# Supplementary material
Source: PubMed Central journal article supplement (PMC2946519)
Supplement: NIHMS213292-supplement-supp_info.pdf [file NIHMS213292-supplement-supp_info.pdf]

## Supplementary Information for

### **Global analysis of lysine ubiquitination by ubiquitin remnant immunoaffinity profiling**

Guoqiang Xu, Jeremy S Paige, Samie R Jaffrey

Department of Pharmacology, Weill Medical College, Cornell University, New York, NY 10065, USA.

#### **Supplementary Information includes:**

1. Supplementary Figs. 1-18.
2. Supplementary Tables 1-2.
3. Supplementary references.

## Supplementary Fig. 1

**a**

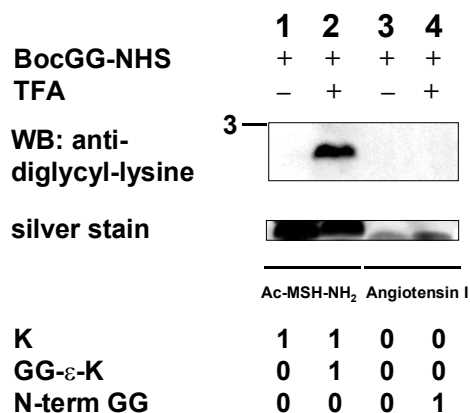

**b**

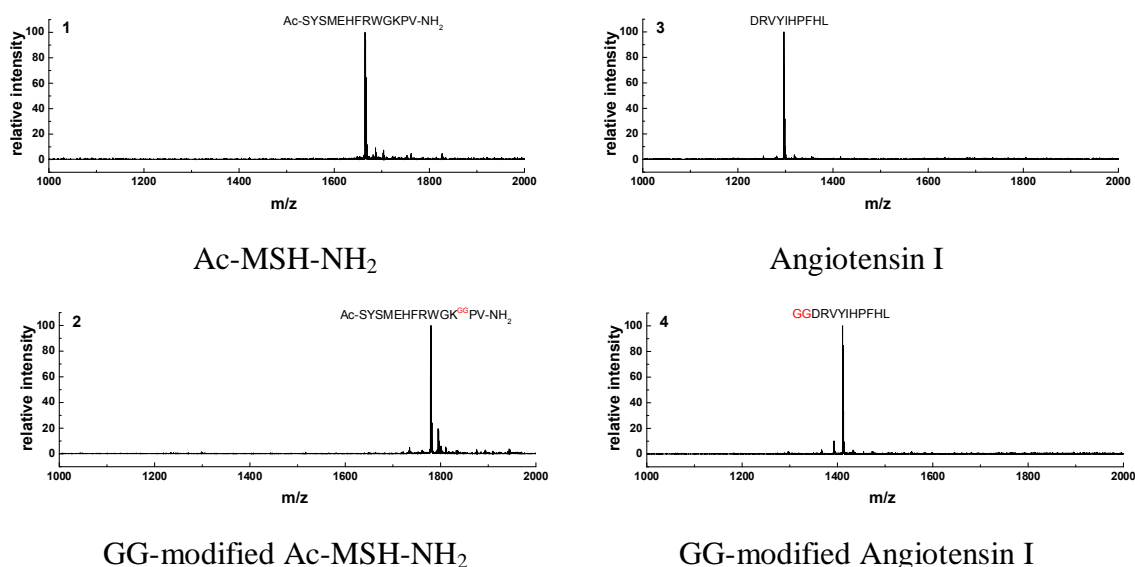

**Supplementary Fig. 1 The anti-diglycyl-lysine antibody specifically interacts with diglycine-modifications on the ε-amine of lysine and does not recognize a peptide with an N-terminal Gly-Gly sequence.**

(a) In our tests of the specificity of the anti-diglycyl-lysine antibody, we considered the fact that 0.4% of tryptic peptides in the human proteome are predicted to contain two glycine residues as the first two N-terminal amino acids. Therefore, we tested the ability of the anti-diglycyl-lysine antibody to recognize peptides that contain this N-terminal sequence. Western blot analysis using the anti-diglycyl-lysine antibody of the following samples: (1) unmodified Ac-MSH-NH<sub>2</sub> peptide, which contains one internal lysine; (2) diglycine (GG)-modified Ac-MSH-NH<sub>2</sub> peptide, which contains a GG-modified lysine; (3) angiotensin I, which contains no lysines; (4) angiotensin I modified to contain a GlyGly sequence at the N-terminus. The numbers of lysines, GG-modified lysines (GG-ε-K), and N-terminal GG sequences are indicated in the chart at the bottom of the blot. A silver stained gel is shown to document peptide loading. The Western blotting experiment demonstrated that the antibody only interacts with the peptide containing GG-ε-K but not the peptide containing an N-terminal GlyGly sequence.

(b) MALDI-TOF-MS of the peptides used in the Western blot experiment above to confirm the complete modification of the lysine and the N-terminal amine in sample 2 and 4, respectively.

## Supplementary Fig. 2

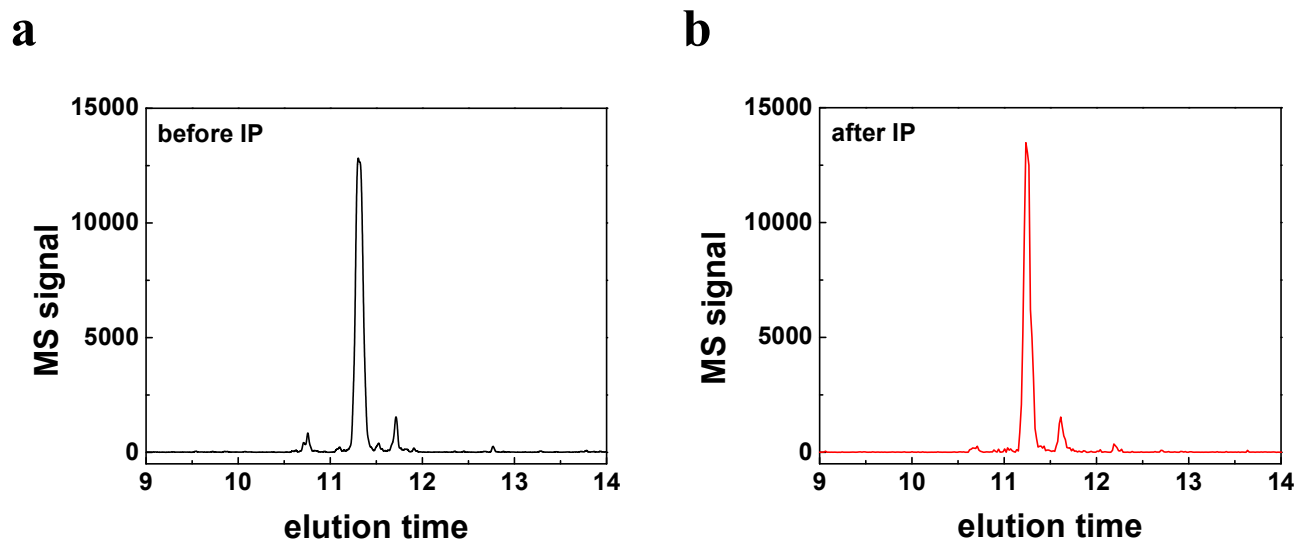

### Supplementary Fig. 2 The anti-diglycyl-lysine antibody can quantitatively immunoprecipitate peptides containing diglycine-modified lysines.

(a) Extracted Ion Chromatography (EIC) of a sample containing a peptide with a diglycine-modified lysine before immunoprecipitation. (b) EIC of the anti-diglycyl-lysine antibody immunoprecipitate. The yield of the immunoprecipitation is calculated based on the areas of the peptide peaks before and after immunoprecipitation. The yield measured from the average of three independent runs is  $1.1 \pm 0.2$ .

A GlyGly-modified Ac-MSH-NH<sub>2</sub> peptide, Ac-SYSMEHFRWGK\*PV-NH<sub>2</sub> (K\* representing Gly-Gly-modified lysine), was dissolved in a buffer containing 50 mM Tris-HCl (pH 7.4) and 150 mM NaCl at a concentration of 0.3 nmol/mL. 100  $\mu$ L of the peptide solution was incubated with 20  $\mu$ L beads coupled with the anti-diglycyl-lysine antibody, washed and eluted five times with 20  $\mu$ L elution buffer (10 mM citric acid, pH 3). The samples before and after immunopurification were acidified and 1  $\mu$ L of each sample was injected to LC-Q-TOF MS for the analysis in MS mode. The EIC of GlyGly-modified Ac-MSH-NH<sub>2</sub> peptide was integrated to calculate the yield. The result indicated that the peptide containing GlyGly-modified lysine was completely immunoprecipitated within the experimental error.

### Supplementary Fig. 3

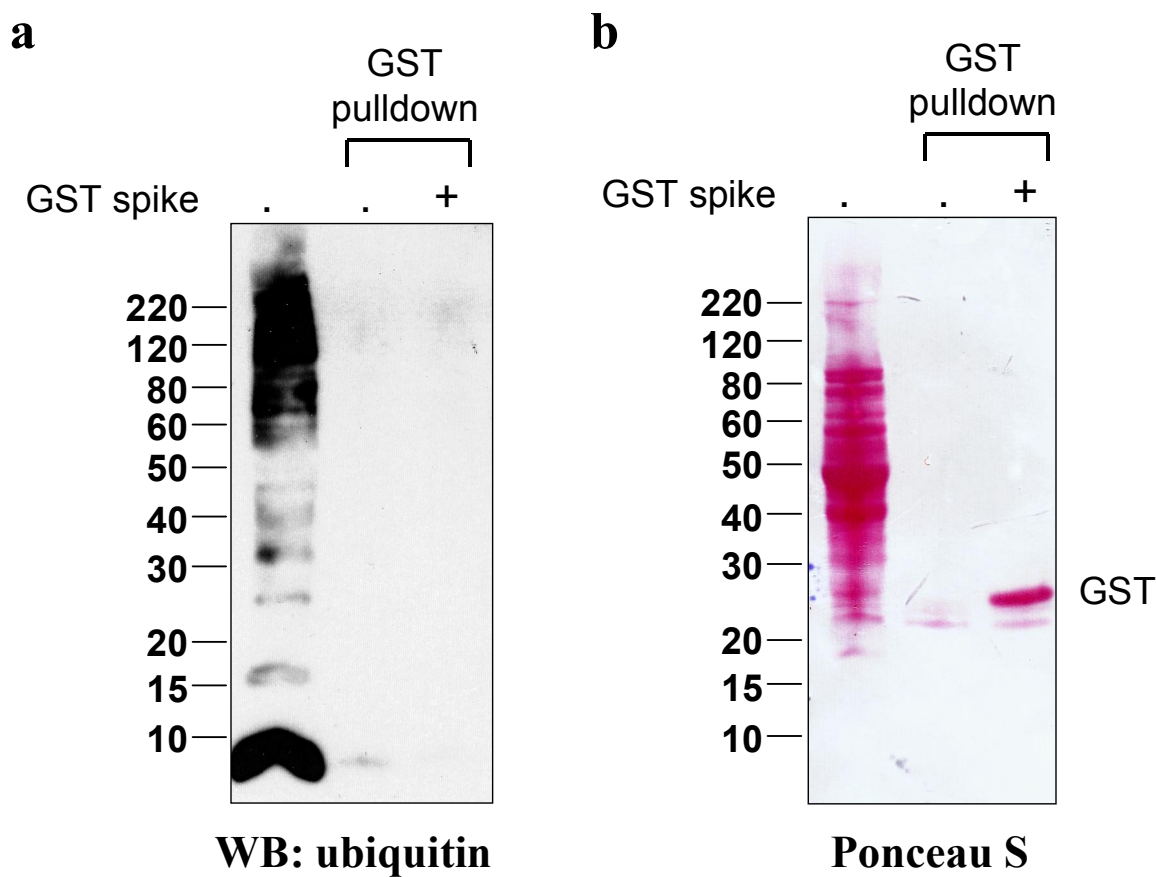

#### Supplementary Fig. 3 Ubiquitination does not occur to a detectable level during sample preparation.

(a) An anti-ubiquitin Western blot to detect the ubiquitination of GST spiked in during sample preparation. To detect whether ubiquitination could happen during the sample preparation, we spiked ~10  $\mu\text{g}$  of bacterially expressed and purified ubiquitin-free glutathione S-transferase (GST), a protein that has surface lysine residues<sup>1</sup> and can be ubiquitinated in cells<sup>2</sup>, to a lysate containing ~100  $\mu\text{g}$  of protein at the beginning of the experiment. Then, glutathione agarose beads were added to the lysate to pull down GST for Western blot analysis. It has been shown that ubiquitinated GST can be pulled down by glutathione agarose beads<sup>2</sup>. In order to assay the non-specific binding, same amount of glutathione agarose beads were added to a lysate without spiking GST. Western blot analysis using an anti-ubiquitin antibody indicated numerous ubiquitinated proteins in the lysate, but absolutely no GST-dependent ubiquitination signal was detected. This indicates that the degree of *ex vivo* ubiquitination is exceedingly low under our experimental conditions. This result confirmed that the ubiquitination occurs in the cells but does not occur, at least not to a detectable level, during the sample preparation.

(b) Ponceau S stain to measure protein loading in the Western blot experiment in (a). The Ponceau S stain of the membrane confirms that GST was pulled down during the experiment.

## Supplementary Fig. 4

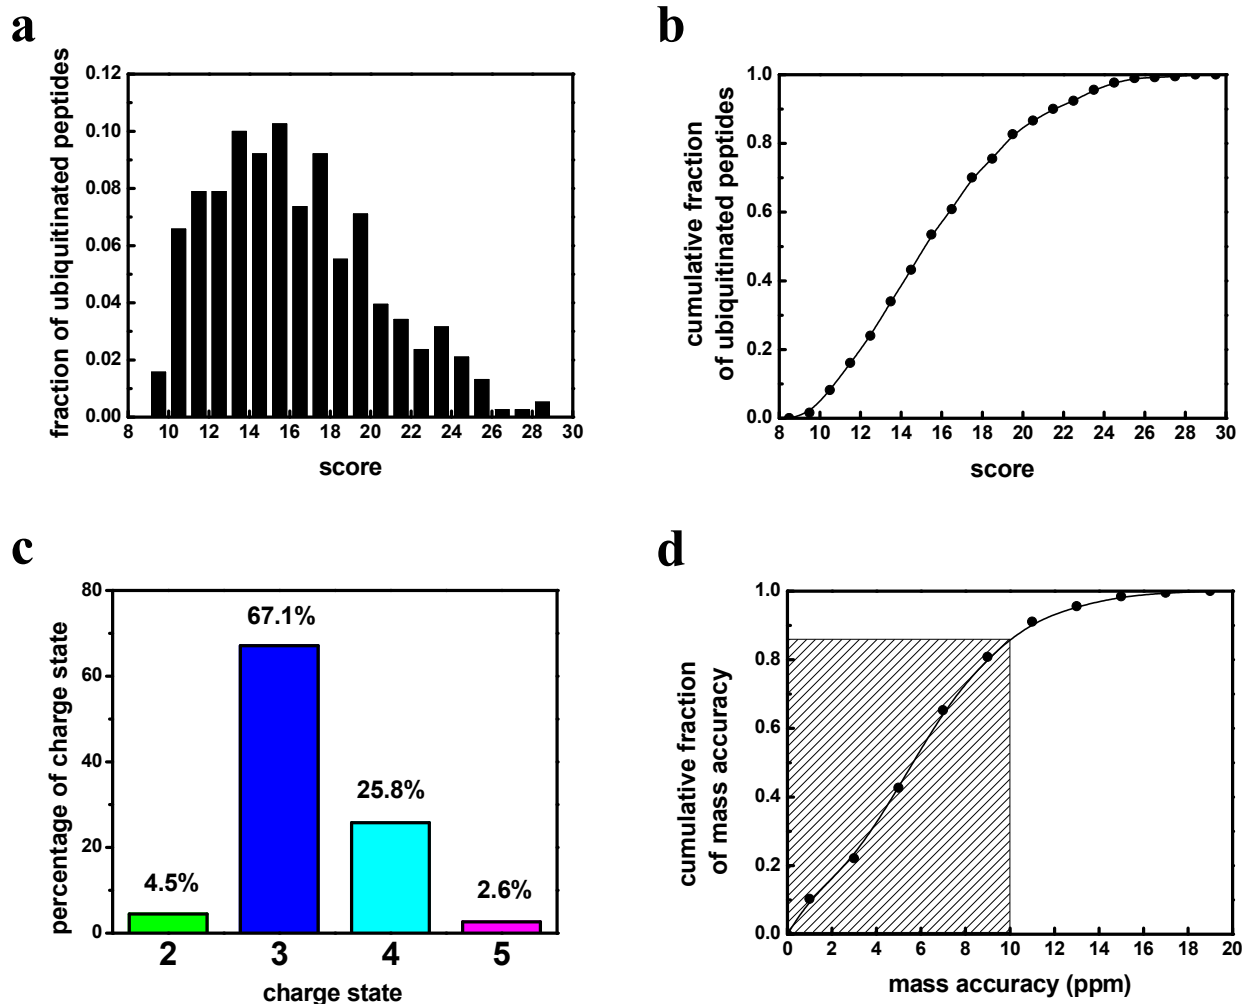

**Supplementary Fig. 4 Distribution of Spectrum Mill score, charge state and mass accuracy of the ubiquitinated peptides identified in our experiments.**

(a) Fraction and (b) Cumulative fraction of scores of ubiquitinated peptides identified by Spectrum Mill. The scores range from 9 to 29. About 80% of the ubiquitinated peptides have a score larger than 12.

(c) Charge state distribution of Spectrum Mill-identified ubiquitinated peptides. The majority (91.4%) of the ubiquitinated peptides have +3 or +4 charges. Ubiquitin remnant peptides have an additional charge since the diglycine moiety on the lysines have an amine.

(d) Cumulative distribution of mass accuracy (ppm) of ubiquitinated peptides identified by Spectrum Mill. More than 80% of ubiquitinated peptides have a mass accuracy of less than 10 ppm, which corresponds to a 0.01 Da mass deviation for a peptide with 1000 Da molecular weight.

## Supplementary Fig. 5

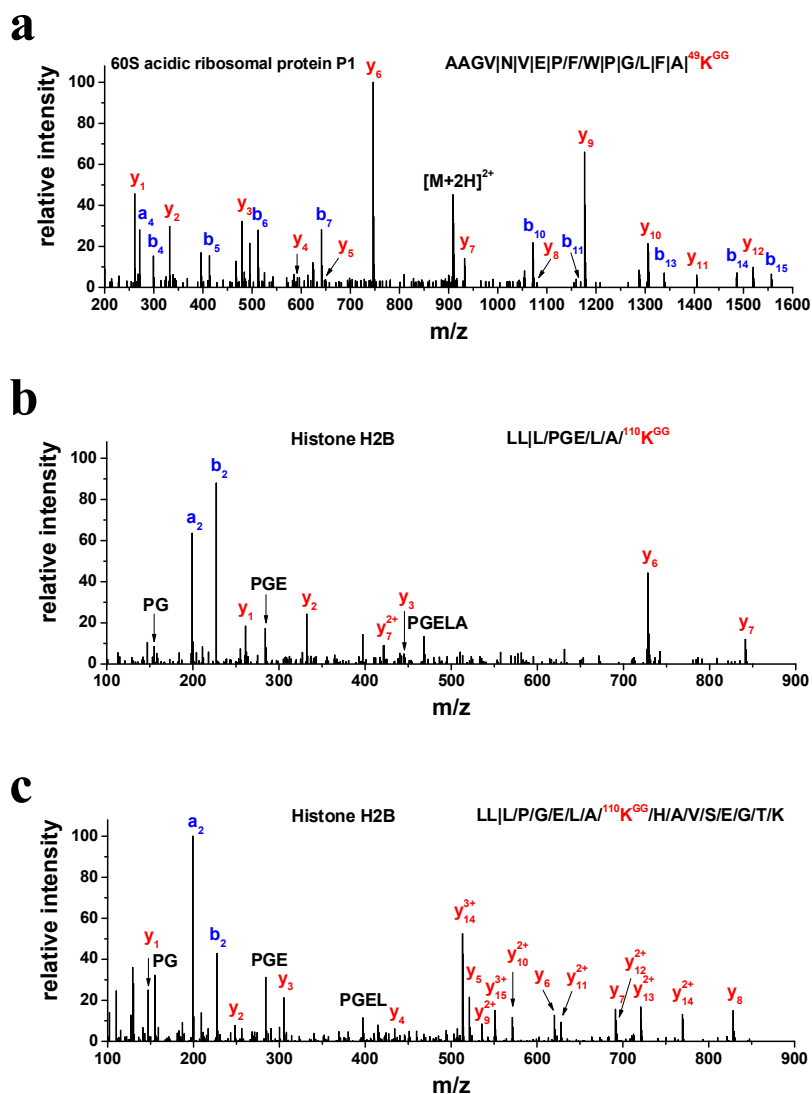

### Supplementary Fig. 5 Ubiquitinated peptides with C-terminal GlyGly-modified lysines are detected.

MS/MS spectra of ubiquitinated peptides from 60S acidic ribosomal protein P1 (**a**) and Histone H2B (**b**), which have a diglycine-modified lysine at the C-terminus (Lys49 and Lys110, respectively). We also detected the same ubiquitinated H2B lysine in a peptide that contained the diglycine-modified Lys at 110 but was not cleaved after this modified lysine (**c**).

The presence of the diglycine-modified lysines at C-terminus of some peptides, such as the one from Histone H2B above, indicates that the C-terminal peptide bond of the diglycine-modified lysine can also be cleaved during the sample preparation by trypsin. Overall, this cleavage is less efficient than that after unmodified lysines or arginines, presumably because the presence of a positive charge on the amino group of GlyGly allows this modified residue to interact with trypsin in a manner similar to the  $\epsilon$ -amine of lysine. This result is consistent with a previous study<sup>3</sup>. In total, our experiments identified 14 (~3%) unique peptides with a C-terminal diglycine-modified lysine.

## Supplementary Fig. 6

(Please see next 380 pages.)

### Supplementary Fig. 6 Annotated MS/MS spectra of ubiquitinated peptides identified in HEK293 cells.

In the **Result Summary**, a list of rank, score, the percentage of the scored peak intensity (SPI%), backbone cleavage score (BCS), variable modification, peptide sequence, precursor ion mass ( $MH^+$ ), precursor ion mass error ( $MH^+$  error), protein molecular weight (MW), Swiss-Prot accession number, and protein name, is shown for the peptides, including up to five highest scored peptides, if they exist, as identified by Spectrum Mill.

In the **Detailed Result**, the peptide rank, modification site, score, SPI%, BCS, sequence map, precursor ion mass ( $MH^+$ ), precursor ion mass error ( $MH^+$  error), protein molecular weight (MW), Swiss-Prot accession number, and protein name are listed for the highest scored peptide. The symbols, \, / and |, represent *b*-ions, *y*-ions, and both *b*-ions and *y*-ions, respectively.

The table shows the *m/z* of experimental MS/MS fragment ions and the matched ion-types as well as the peak intensity, score of each matched ions, and delta mass (ppm) measuring the difference between the theoretical and experimental peptide precursor masses.

In the annotated spectra, matched ions are shown in red vertical segments and labeled as *b* or *y*-ions, while the unmatched ions are shown in black vertical segments. Some red vertical segments are not labeled automatically by Spectrum Mill because of the lack of space in the spectra. The detailed information about these peaks is listed in the table of fragment ions.

In total, 380 ubiquitinated peptides were detected and their annotated MS/MS spectra were provided. The number at the left upper corner of each spectrum corresponds to the number in Supplementary Table 1.

Note that some ubiquitination sites in the ubiquitinated peptides containing two diglycine-modified lysines are also identified in the ubiquitinated peptides containing a single diglycine-modified lysine. Therefore, this list has six more ubiquitinated peptides than ubiquitination sites.

Result Summary

| Rank | Score | SPI (%) | BCS | # Unmatched Ions | Variable sites | Sequence                          | MH <sup>+</sup> Calculated (Da) | MH <sup>+</sup> Error (Da) | MH <sup>+</sup> Error (ppm) | Protein MW/pl (Da) | Species | Accession # | Protein Name                                                 |
|------|-------|---------|-----|------------------|----------------|-----------------------------------|---------------------------------|----------------------------|-----------------------------|--------------------|---------|-------------|--------------------------------------------------------------|
| 1    | 19.31 | 80.4    | 10  | 4/25             | K51k           | (R)NLLSVAYK <sup>N</sup> VVGAR(R) | 1503.8642                       | 114.0478                   | 3.0                         | 28082.5/4.76       | HUMAN   | P31946      | 14-3-3 protein beta/alpha OS=Homo sapiens GN=YWHAB PE=1 SV=3 |
| 1    | 19.31 | 80.4    | 10  | 4/25             | K50k           | (R)NLLSVAYK <sup>N</sup> VVGAR(R) | 1503.8642                       | 114.0478                   | 3.0                         | 28218.9/4.76       | HUMAN   | Q04917      | 14-3-3 protein eta OS=Homo sapiens GN=YWHAH PE=1 SV=4        |
| 1    | 19.31 | 80.4    | 10  | 4/25             | K50k           | (R)NLLSVAYK <sup>N</sup> VVGAR(R) | 1503.8642                       | 114.0478                   | 3.0                         | 28302.7/4.80       | HUMAN   | P61981      | 14-3-3 protein gamma OS=Homo sapiens GN=YWHAG PE=1 SV=2      |
| 1    | 19.31 | 80.4    | 10  | 4/25             | K49k           | (R)NLLSVAYK <sup>N</sup> VVGAR(R) | 1503.8642                       | 114.0478                   | 3.0                         | 27745.3/4.73       | HUMAN   | P63104      | 14-3-3 protein zeta/delta OS=Homo sapiens GN=YWHAZ PE=1 SV=1 |
| 2    | 16.55 | 78.3    | 8   | 5/25             | None           | (R)NLLSVAYK <sup>N</sup> VVGQR(A) | 1617.9071                       | 0.0048                     | 3.0                         | 27774.2/4.68       | HUMAN   | P31947      | 14-3-3 protein sigma OS=Homo sapiens GN=SFN PE=1 SV=1        |

Detailed Results

| Rank | Score | SPI (%) | BCS | # Unmatched Ions | Variable sites | Sequence                          | MH <sup>+</sup> Calculated (Da) | MH <sup>+</sup> Error (Da) | MH <sup>+</sup> Error (ppm) | Protein MW/pl (Da) | Species | Accession # | MS-Digest Index # | Protein Name                                                 |
|------|-------|---------|-----|------------------|----------------|-----------------------------------|---------------------------------|----------------------------|-----------------------------|--------------------|---------|-------------|-------------------|--------------------------------------------------------------|
| 1    | 19.31 | 80.4    | 10  | 4/25             | K51k           | (R)NLLSVAYK <sup>N</sup> VVGAR(R) | 1503.8642                       | 114.0478                   | 3.0                         | 28082.5/4.76       | HUMAN   | P31946      | 283               | 14-3-3 protein beta/alpha OS=Homo sapiens GN=YWHAB PE=1 SV=3 |
| 1    | 19.31 | 80.4    | 10  | 4/25             | K50k           | (R)NLLSVAYK <sup>N</sup> VVGAR(R) | 1503.8642                       | 114.0478                   | 3.0                         | 28218.9/4.76       | HUMAN   | Q04917      | 329               | 14-3-3 protein eta OS=Homo sapiens GN=YWHAH PE=1 SV=4        |
| 1    | 19.31 | 80.4    | 10  | 4/25             | K50k           | (R)NLLSVAYK <sup>N</sup> VVGAR(R) | 1503.8642                       | 114.0478                   | 3.0                         | 28302.7/4.80       | HUMAN   | P61981      | 341               | 14-3-3 protein gamma OS=Homo sapiens GN=YWHAG PE=1 SV=2      |
| 1    | 19.31 | 80.4    | 10  | 4/25             | K49k           | (R)NLLSVAYK <sup>N</sup> VVGAR(R) | 1503.8642                       | 114.0478                   | 3.0                         | 27745.3/4.73       | HUMAN   | P63104      | 387               | 14-3-3 protein zeta/delta OS=Homo sapiens GN=YWHAZ PE=1 SV=1 |

| Fragment-ion (m/z)     | 70.064 | 72.080 | 84.080 | 86.095 | 87.053 | 136.074 | 141.100 | 155.118 | 159.111 | 175.115 | 183.111 | 187.105 | 200.138 | 228.135 | 303.176 | 324.181 | 341.216 | 402.247 | 501.316 | 510.777 <sup>+2</sup> | 615.359 | 695.885 <sup>+2</sup> | 857.494 | 1020.573 | 1091.593 |
|------------------------|--------|--------|--------|--------|--------|---------|---------|---------|---------|---------|---------|---------|---------|---------|---------|---------|---------|---------|---------|-----------------------|---------|-----------------------|---------|----------|----------|
| Frac. Inten.(% of TIC) | 0.01   | 0.17   | 10.02  | 0.58   | 2.66   | 0.11    | 2.80    | 3.09    | 4.04    | 3.85    | 3.66    | 2.84    | 14.34   | 3.62    | 5.67    | 2.69    | 3.60    | 7.12    | 2.95    | 2.91                  | 8.29    | 3.36                  | 4.37    | 3.54     | 3.73     |
| Rel. Inten.(% of BP)   | 0.04   | 1.16   | 69.87  | 4.03   | 18.57  | 0.75    | 19.50   | 21.53   | 28.20   | 26.84   | 25.52   | 19.78   | 100.00  | 25.28   | 39.55   | 18.77   | 25.11   | 49.69   | 20.55   | 20.29                 | 57.79   | 23.40                 | 30.46   | 24.67    | 26.02    |
| Score                  | 0.20   | 0.50   | -0.70  | 0.22   | 0.50   | 1.00    | -0.19   | -0.22   | 0.50    | 1.50    | -0.26   | 0.75    | 0.50    | 0.75    | 1.50    | 0.25    | 0.50    | 1.50    | 1.50    | 1.50                  | 1.50    | 1.50                  | 1.50    | 1.50     | 1.50     |
| Ion-type               | PR     | V      |        | LI     | a1     | Y       |         | SV-28   | y1      |         | SV      |         | a2      | b2      | y3      | b3-NH3  | b3      | y4      | y5      | y6 <sup>+2</sup>      | y6      | b12+H2O <sup>+2</sup> | y7      | y8       | y9       |
| Delta ppm              | -14.6  | -10.8  |        | -13.1  | -38.9  | 0.50    | -15.4   |         | -20.1   | -22.0   |         | -22.0   | -11.7   | -0.7    | -3.4    | -37.3   | -10.9   | 2.1     | 2.9     | -11.9                 | 2.6     | -5.7                  | -1.4    | 14.0     | -2.3     |
|                        |        |        |        | NR     |        |         |         |         |         |         |         |         | VGA-28  | VGA     |         |         |         |         |         |                       |         | y12 <sup>+2</sup>     |         |          |          |
|                        |        |        |        | -26.3  |        |         |         |         |         |         |         |         | -11.7   | -0.7    |         |         |         |         |         |                       |         | -12.9                 |         |          |          |

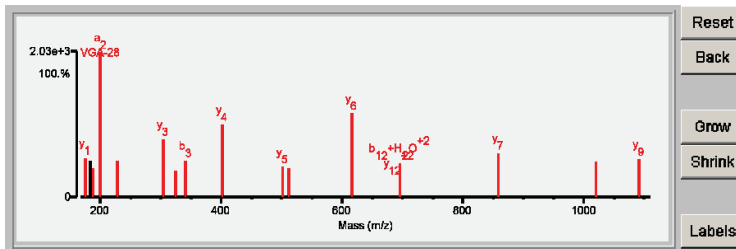



Result Summary

| Rank | Score | SPI (%) | BCS | # Unmatched Ions | Variable sites | Sequence                                | MH <sup>+</sup> Calculated (Da) | MH <sup>+</sup> Error (Da) | MH <sup>+</sup> Error (ppm) | Protein MW/pi (Da) | Species | Accession # | Protein Name                                              |
|------|-------|---------|-----|------------------|----------------|-----------------------------------------|---------------------------------|----------------------------|-----------------------------|--------------------|---------|-------------|-----------------------------------------------------------|
| 1    | 21.38 | 89.2    | 10  | 4/25             | K106k          | (K) <u>LICCDILDVLDKHLIPAANTGESK</u> (V) | 2695.3793                       | 114.0592                   | 5.8                         | 29174.1/4.63       | HUMAN   | P62258      | 14-3-3 protein epsilon OS=Homo sapiens GN=YWHAE PE=1 SV=1 |
| 2    | 11.42 | 68.1    | 6   | 9/25             | K118k          | (K) <u>LICCDILDVLDKHLIPAANTGESK</u> (V) | 2695.3793                       | 114.0592                   | 5.8                         | 29174.1/4.63       | HUMAN   | P62258      | 14-3-3 protein epsilon OS=Homo sapiens GN=YWHAE PE=1 SV=1 |

Detailed Results

| Rank                   | Score | SPI (%) | BCS | # Unmatched Ions | Variable sites | Sequence                                                              | MH <sup>+</sup> Calculated (Da) | MH <sup>+</sup> Error (Da) | MH <sup>+</sup> Error (ppm) | Protein MW/pi (Da) | Species | Accession #    | MS-Digest Index # | Protein Name                                              |                              |                |         |                |                |         |                |                       |                              |                       |                               |                       |                               |                       |         |                        |          |      |       |  |
|------------------------|-------|---------|-----|------------------|----------------|-----------------------------------------------------------------------|---------------------------------|----------------------------|-----------------------------|--------------------|---------|----------------|-------------------|-----------------------------------------------------------|------------------------------|----------------|---------|----------------|----------------|---------|----------------|-----------------------|------------------------------|-----------------------|-------------------------------|-----------------------|-------------------------------|-----------------------|---------|------------------------|----------|------|-------|--|
| 1                      | 21.38 | 89.2    | 10  | 4/25             | K106k          | (K) L I / C D I I L / D V L D K H L I / P / A A / N / T G E / S R (V) | 2695.3793                       | 114.0592                   | 5.8                         | 29174.1/4.63       | HUMAN   | P62258         | 317               | 14-3-3 protein epsilon OS=Homo sapiens GN=YWHAE PE=1 SV=1 |                              |                |         |                |                |         |                |                       |                              |                       |                               |                       |                               |                       |         |                        |          |      |       |  |
| Fragment-ion (m/z)     |       |         |     |                  |                |                                                                       | 72.078                          | 84.079                     | 86.095                      | 199.180            | 229.116 | 234.138        | 389.155           | 436.096                                                   | 437.716 <sup>+2</sup>        | 521.251        | 549.170 | 635.301        | 662.254        | 721.400 | 775.342        | 776.370 <sup>+2</sup> | 777.366                      | 797.947 <sup>+2</sup> | 854.974 <sup>+2</sup>         | 861.752 <sup>+3</sup> | 874.427                       | 961.517 <sup>+2</sup> | 987.521 | 1018.039 <sup>+2</sup> | 1048.570 |      |       |  |
| Frac. Inten.(% of TIC) |       |         |     |                  |                |                                                                       | 0.11                            | 0.06                       | 17.41                       | 9.06               | 1.86    | 1.86           | 1.97              | 5.97                                                      | 10.94                        | 2.04           | 1.88    | 1.91           | 3.85           | 2.56    | 1.82           | 1.85                  | 3.83                         | 2.80                  | 3.18                          | 2.65                  | 12.07                         | 2.93                  | 1.92    | 2.45                   | 3.01     |      |       |  |
| Rel. Inten.(% of BP)   |       |         |     |                  |                |                                                                       | 0.62                            | 0.33                       | 100.00                      | 52.01              | 10.70   | 10.71          | 11.34             | 34.26                                                     | 62.85                        | 11.69          | 10.77   | 22.11          | 14.70          | 10.46   | 10.61          | 21.98                 | 16.08                        | 18.28                 | 15.22                         | 69.31                 | 16.82                         | 11.05                 | 14.09   | 17.31                  |          |      |       |  |
| Score                  |       |         |     |                  |                |                                                                       | 0.50                            | 0.50                       | 0.50                        | 0.50               | 0.75    | 1.50           | 0.75              | 0.75                                                      | 1.50                         | 0.75           | 1.50    | 0.75           | 1.50           | 0.75    | 0.50           | -0.11                 | 1.50                         | -0.16                 | -0.18                         | 1.50                  | 1.50                          | 1.50                  | 1.50    | 1.50                   | 1.50     | 1.50 | -0.17 |  |
| Ion-type               |       |         |     |                  |                |                                                                       | V                               | KQ                         | a <sub>1</sub>              | a <sub>2</sub>     | LD      | y <sub>2</sub> | CDI               | CCD                                                       | y <sub>9</sub> <sup>+2</sup> | y <sub>5</sub> | CCDI    | y <sub>6</sub> | b <sub>5</sub> | DkHLI   | b <sub>6</sub> | y <sub>8</sub>        | y <sub>2</sub> <sup>+3</sup> | y <sub>9</sub>        | y <sub>17</sub> <sup>+2</sup> | y <sub>10</sub>       | y <sub>18</sub> <sup>+2</sup> |                       |         |                        |          |      |       |  |
| Delta ppm              |       |         |     |                  |                |                                                                       | -35.7                           | -22.3                      | -27.0                       | -8.5               | -13.9   | -27.9          | 13.5              | -1.9                                                      | -2.0                         | -9.7           | -20.0   | 2.2            | -15.9          | -0.6    | -9.4           | -9.7                  |                              |                       | -5.0                          | 0.4                   | 15.5                          | 10.4                  |         |                        |          |      |       |  |

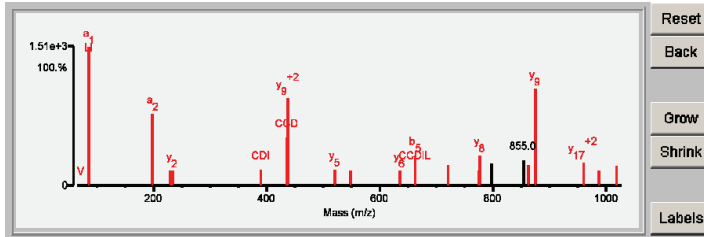

Result Summary

| Rank | Score | SPI (%) | BCS | # Unmatched Ions | Variable sites | Sequence                    | MH <sup>+</sup> Calculated (Da) | MH <sup>+</sup> Error (Da) | MH <sup>+</sup> Error (ppm) | Protein MW/pl (Da) | Species | Accession # | Protein Name                                              |
|------|-------|---------|-----|------------------|----------------|-----------------------------|---------------------------------|----------------------------|-----------------------------|--------------------|---------|-------------|-----------------------------------------------------------|
| 1    | 23.12 | 93.4    | 14  | 2/25             | K196K          | (R) LAKAFDDAIELDTLSEESYK(D) | 2400.1817                       | 114.0568                   | 5.5                         | 29174.114.63       | HUMAN   | P62258      | 14-3-3 protein epsilon OS=Homo sapiens GN=YWHAE PE=1 SV=1 |

Detailed Results

| Rank                   | Score | SPI (%) | BCS    | # Unmatched Ions | Variable sites | Sequence                    | MH <sup>+</sup> Calculated (Da) | MH <sup>+</sup> Error (Da) | MH <sup>+</sup> Error (ppm) | Protein MW/pl (Da)    | Species               | Accession # | MS-Digest Index #     | Protein Name                                              |                       |         |                       |                       |         |         |          |          |          |          |          |          |
|------------------------|-------|---------|--------|------------------|----------------|-----------------------------|---------------------------------|----------------------------|-----------------------------|-----------------------|-----------------------|-------------|-----------------------|-----------------------------------------------------------|-----------------------|---------|-----------------------|-----------------------|---------|---------|----------|----------|----------|----------|----------|----------|
| 1                      | 23.12 | 93.4    | 14     | 2/25             | K196K          | (R) LAKAFDDAIELDTLSEESYK(D) | 2400.1817                       | 114.0568                   | 5.5                         | 29174.114.63          | HUMAN                 | P62258      | 317                   | 14-3-3 protein epsilon OS=Homo sapiens GN=YWHAE PE=1 SV=1 |                       |         |                       |                       |         |         |          |          |          |          |          |          |
| Fragment-ion (m/z)     |       | 84.081  | 86.096 | 185.130          | 201.082        | 217.082                     | 310.177                         | 314.168                    | 397.209                     | 473.733 <sup>+2</sup> | 509.263 <sup>+2</sup> | 526.251     | 527.243 <sup>+2</sup> | 655.301                                                   | 665.827 <sup>+2</sup> | 742.330 | 743.331 <sup>+2</sup> | 831.418 <sup>+2</sup> | 855.417 | 956.463 | 1017.504 | 1071.474 | 1130.564 | 1184.587 | 1313.588 | 1384.636 |
| Frac. Inten.(% of TIC) |       | 0.09    | 17.28  | 2.09             | 2.60           | 1.93                        | 3.65                            | 2.79                       | 2.41                        | 2.71                  | 2.48                  | 2.10        | 2.97                  | 2.25                                                      | 2.19                  | 8.28    | 4.23                  | 2.40                  | 4.17    | 3.48    | 6.31     | 9.89     | 2.77     | 3.44     | 3.08     | 4.40     |
| Rel. Inten.(% of BP)   |       | 0.52    | 100.00 | 12.12            | 15.05          | 11.16                       | 21.15                           | 16.16                      | 13.95                       | 15.67                 | 14.33                 | 12.13       | 17.18                 | 13.00                                                     | 12.69                 | 47.92   | 24.49                 | 13.88                 | 24.10   | 20.12   | 36.53    | 57.25    | 16.05    | 19.89    | 17.85    | 25.47    |
| Score                  |       | 0.50    | 0.50   | 0.75             | 0.75           | 0.75                        | 1.50                            | 0.75                       | 1.50                        | 0.50                  | 0.50                  | 1.50        | 0.50                  | 1.50                                                      | 0.50                  | 1.50    | -0.24                 | -0.14                 | 1.50    | 1.50    | 0.50     | 1.50     | 1.50     | 1.50     | 1.50     | 1.50     |
| Ion-type               |       | KQ      | a1     | b2               | AE             | ES                          | y2                              | AEL                        | y3                          | b9 <sup>+2</sup>      | b9 <sup>+2</sup>      | y4          | y4                    | y5                                                        | b12 <sup>+2</sup>     | y6      | y6                    | y7                    | y8      | b9      | y9       | b10      | y10      | y11      | y12      |          |
| Delta ppm              |       | 6.2     | -21.2  | 1.9              | -30.7          | -3.2                        | 1.8                             | -11.9                      | 1.9                         | -5.1                  | 17.7                  | 0.3         | 4.8                   | 11.1                                                      | -14.4                 | 6.0     |                       |                       | 8.6     | 6.5     | 2.8      | -9.6     | -19.1    | 15.7     | -17.7    | -8.5     |
|                        |       |         | 0.50   |                  | IA             |                             |                                 |                            |                             |                       |                       |             |                       |                                                           |                       |         |                       |                       |         |         |          |          |          |          |          |          |
|                        |       |         | -8.4   |                  | LI             |                             |                                 |                            |                             |                       |                       |             |                       |                                                           |                       |         |                       |                       |         |         |          |          |          |          |          |          |

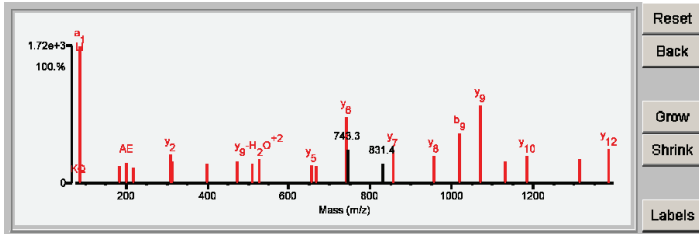

Result Summary

| Rank | Score | SPI (%) | BCS | # Unmatched Ions | Variable sites | Sequence             | MH <sup>+</sup> Calculated (Da) | MH <sup>+</sup> Error (Da) | MH <sup>+</sup> Error (ppm) | Protein MW/pi (Da) | Species | Accession # | Protein Name                                              |
|------|-------|---------|-----|------------------|----------------|----------------------|---------------------------------|----------------------------|-----------------------------|--------------------|---------|-------------|-----------------------------------------------------------|
| 1    | 12.54 | 62.0    | 9   | 10/25            | K50k           | (R)NLLSVAYKNVIGAR(R) | 1517.8798                       | 114.0442                   | 0.8                         | 29174.1/4.63       | HUMAN   | P62258      | 14-3-3 protein epsilon OS=Homo sapiens GN=YWHAE PE=1 SV=1 |

Detailed Results

| Rank | Score | SPI (%) | BCS | # Unmatched Ions | Variable sites | Sequence                           | MH <sup>+</sup> Calculated (Da) | MH <sup>+</sup> Error (Da) | MH <sup>+</sup> Error (ppm) | Protein MW/pi (Da) | Species | Accession # | MS-Digest Index # | Protein Name                                              |
|------|-------|---------|-----|------------------|----------------|------------------------------------|---------------------------------|----------------------------|-----------------------------|--------------------|---------|-------------|-------------------|-----------------------------------------------------------|
| 1    | 12.54 | 62.0    | 9   | 10/25            | K50k           | (R)N L/L/S V A/Y/K/N/V/I/G A/R (R) | 1517.8798                       | 114.0442                   | 0.8                         | 29174.1/4.63       | HUMAN   | P62258      | 317               | 14-3-3 protein epsilon OS=Homo sapiens GN=YWHAE PE=1 SV=1 |

  

| Fragment-ion (m/z)      | 70.065 | 72.079 | 84.079 | 86.095 | 87.054 | 120.080 | 155.119 | 159.112 | 175.117 | 183.111 | 200.140 | 282.175 | 303.187 | 341.217 | 385.115 | 416.262 | 515.315 | 603.337 | 619.328 | 629.367 | 702.899 <sup>+2</sup>                           | 764.928 | 848.894 | 871.516 | 1034.548 |
|-------------------------|--------|--------|--------|--------|--------|---------|---------|---------|---------|---------|---------|---------|---------|---------|---------|---------|---------|---------|---------|---------|-------------------------------------------------|---------|---------|---------|----------|
| Frac. Inten. (% of TIC) | 0.00   | 0.26   | 9.47   | 0.72   | 3.74   | 3.34    | 4.82    | 2.85    | 6.24    | 2.70    | 13.21   | 2.72    | 6.17    | 5.60    | 3.48    | 5.19    | 2.90    | 2.95    | 2.80    | 4.78    | 4.16                                            | 3.18    | 2.54    | 2.96    | 3.22     |
| Rel. Inten. (% of BP)   | 0.04   | 1.96   | 71.69  | 5.48   | 28.31  | 25.26   | 36.51   | 21.59   | 47.24   | 20.44   | 100.00  | 20.61   | 46.69   | 42.38   | 26.33   | 39.27   | 21.95   | 22.35   | 21.23   | 36.22   | 31.47                                           | 24.05   | 19.25   | 22.41   | 24.41    |
| Score                   | 0.20   | 0.50   | -0.72  | 0.22   | 0.50   | -0.25   | -0.37   | -0.22   | 1.50    | -0.20   | 0.50    | -0.21   | 1.50    | 0.75    | -0.26   | 1.50    | 1.50    | -0.22   | 0.75    | 1.50    | 1.50                                            | -0.24   | -0.19   | 1.50    | 1.50     |
| Ion-type                | PR     | V      | V      | LI     | a1     |         |         | y1      |         | a2      |         | y3      | b3      |         | y4      | y5      |         | YKNV    |         | y6      | b <sub>12</sub> +H <sub>2</sub> O <sup>+2</sup> |         |         | y7      | y8       |
| Delta ppm               | -4.6   | -20.5  |        | -11.9  | -32.0  | 0.50    |         | -9.4    |         | -3.8    |         | 30.2    |         | -5.9    | 0.5     | -29.3   |         | 12.1    |         | -10.1   | 3.8                                             |         |         | 5.9     | -25.2    |
|                         |        |        |        |        | NR     |         |         |         |         |         |         |         |         | VIGA    |         |         |         |         |         |         | -3.5                                            |         |         |         |          |

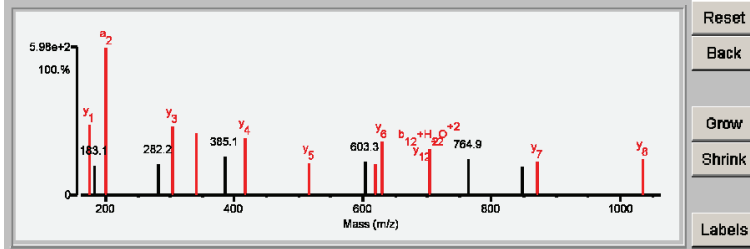

Result Summary

| Rank | Score | SPI (%) | BCS | # Unmatched Ions | Variable sites | Sequence              | MH <sup>+</sup> Calculated (Da) | MH <sup>+</sup> Error (Da) | MH <sup>+</sup> Error (ppm) | Protein MW/pi (Da) | Species | Accession # | Protein Name                                                         |
|------|-------|---------|-----|------------------|----------------|-----------------------|---------------------------------|----------------------------|-----------------------------|--------------------|---------|-------------|----------------------------------------------------------------------|
| 1    | 17.93 | 88.4    | 8   | 5/24             | K258k          | (R)VGSELIQKYLGDGPK(L) | 1702.9374                       | 114.0569                   | 7.7                         | 49184.8/5.87       | HUMAN   | P62191      | 26S protease regulatory subunit 4 OS=Homo sapiens GN=PSMC1 PE=1 SV=1 |
| 2    | 11.24 | 71.8    | 4   | 9/24             | K265k          | (R)VGSELIQKYLGDGPK(L) | 1702.9374                       | 114.0569                   | 7.7                         | 49184.8/5.87       | HUMAN   | P62191      | 26S protease regulatory subunit 4 OS=Homo sapiens GN=PSMC1 PE=1 SV=1 |

Detailed Results

| Rank                                                                                                                                                                                                                                                                                                                                                                                                                                                                                                                                                                                                                                                                                                                                                                                                                                                                                                                                                                                                                                                                                                                                                                                                                                                                                                                                                                                                                                                                                                                                                                                                                                                                                                                                                                                                                                                                                                                                                                                                                                                                                                                                                                                                                                                                                                                                                                                                                                                                                                                                  | Score  | SPI (%) | BCS    | # Unmatched Ions | Variable sites | Sequence                                                | MH <sup>+</sup> Calculated (Da) | MH <sup>+</sup> Error (Da) | MH <sup>+</sup> Error (ppm) | Protein MW/pi (Da) | Species | Accession # | MS-Digest Index # | Protein Name                                                         |                       |         |         |         |                       |                                    |                       |         |          |          |         |         |         |         |         |                       |         |         |         |                       |                       |                       |         |          |          |                         |      |      |      |      |      |       |      |      |      |      |      |      |      |      |      |      |      |      |      |      |       |      |      |      |                       |      |      |      |      |       |        |       |       |       |       |       |       |       |       |       |       |       |       |       |       |       |       |       |       |       |      |      |      |      |       |      |      |       |      |      |      |       |      |      |      |       |      |      |       |      |      |      |      |      |          |    |    |    |    |  |    |    |  |                      |     |    |  |      |    |                  |  |    |    |  |                                    |                   |    |    |     |           |       |       |       |       |  |      |       |  |       |      |      |  |     |      |     |  |      |      |  |      |      |     |     |      |
|---------------------------------------------------------------------------------------------------------------------------------------------------------------------------------------------------------------------------------------------------------------------------------------------------------------------------------------------------------------------------------------------------------------------------------------------------------------------------------------------------------------------------------------------------------------------------------------------------------------------------------------------------------------------------------------------------------------------------------------------------------------------------------------------------------------------------------------------------------------------------------------------------------------------------------------------------------------------------------------------------------------------------------------------------------------------------------------------------------------------------------------------------------------------------------------------------------------------------------------------------------------------------------------------------------------------------------------------------------------------------------------------------------------------------------------------------------------------------------------------------------------------------------------------------------------------------------------------------------------------------------------------------------------------------------------------------------------------------------------------------------------------------------------------------------------------------------------------------------------------------------------------------------------------------------------------------------------------------------------------------------------------------------------------------------------------------------------------------------------------------------------------------------------------------------------------------------------------------------------------------------------------------------------------------------------------------------------------------------------------------------------------------------------------------------------------------------------------------------------------------------------------------------------|--------|---------|--------|------------------|----------------|---------------------------------------------------------|---------------------------------|----------------------------|-----------------------------|--------------------|---------|-------------|-------------------|----------------------------------------------------------------------|-----------------------|---------|---------|---------|-----------------------|------------------------------------|-----------------------|---------|----------|----------|---------|---------|---------|---------|---------|-----------------------|---------|---------|---------|-----------------------|-----------------------|-----------------------|---------|----------|----------|-------------------------|------|------|------|------|------|-------|------|------|------|------|------|------|------|------|------|------|------|------|------|------|-------|------|------|------|-----------------------|------|------|------|------|-------|--------|-------|-------|-------|-------|-------|-------|-------|-------|-------|-------|-------|-------|-------|-------|-------|-------|-------|-------|-------|------|------|------|------|-------|------|------|-------|------|------|------|-------|------|------|------|-------|------|------|-------|------|------|------|------|------|----------|----|----|----|----|--|----|----|--|----------------------|-----|----|--|------|----|------------------|--|----|----|--|------------------------------------|-------------------|----|----|-----|-----------|-------|-------|-------|-------|--|------|-------|--|-------|------|------|--|-----|------|-----|--|------|------|--|------|------|-----|-----|------|
| 1                                                                                                                                                                                                                                                                                                                                                                                                                                                                                                                                                                                                                                                                                                                                                                                                                                                                                                                                                                                                                                                                                                                                                                                                                                                                                                                                                                                                                                                                                                                                                                                                                                                                                                                                                                                                                                                                                                                                                                                                                                                                                                                                                                                                                                                                                                                                                                                                                                                                                                                                     | 17.93  | 88.4    | 8      | 5/24             | K258k          | (R) V V   G S E L / I / Q / k / Y / L / G D / G P K (L) | 1702.9374                       | 114.0569                   | 7.7                         | 49184.8/5.87       | HUMAN   | P62191      | 520859            | 26S protease regulatory subunit 4 OS=Homo sapiens GN=PSMC1 PE=1 SV=1 |                       |         |         |         |                       |                                    |                       |         |          |          |         |         |         |         |         |                       |         |         |         |                       |                       |                       |         |          |          |                         |      |      |      |      |      |       |      |      |      |      |      |      |      |      |      |      |      |      |      |      |       |      |      |      |                       |      |      |      |      |       |        |       |       |       |       |       |       |       |       |       |       |       |       |       |       |       |       |       |       |       |      |      |      |      |       |      |      |       |      |      |      |       |      |      |      |       |      |      |       |      |      |      |      |      |          |    |    |    |    |  |    |    |  |                      |     |    |  |      |    |                  |  |    |    |  |                                    |                   |    |    |     |           |       |       |       |       |  |      |       |  |       |      |      |  |     |      |     |  |      |      |  |      |      |     |     |      |
| <table border="1"> <thead> <tr> <th>Fragment-ion (m/z)</th> <th>70.064</th> <th>72.081</th> <th>84.079</th> <th>86.095</th> <th>147.104</th> <th>171.149</th> <th>199.143</th> <th>200.145</th> <th>256.087</th> <th>274.102</th> <th>301.186</th> <th>310.150</th> <th>387.190</th> <th>473.246</th> <th>496.264<sup>+2</sup></th> <th>551.805</th> <th>586.319</th> <th>749.392</th> <th>752.897<sup>+2</sup></th> <th>800.931<sup>+2</sup></th> <th>809.937<sup>+2</sup></th> <th>991.525</th> <th>1119.582</th> <th>1232.659</th> </tr> </thead> <tbody> <tr> <td>Frac. Inten. (% of TIC)</td> <td>0.00</td> <td>0.93</td> <td>0.23</td> <td>0.18</td> <td>2.48</td> <td>18.04</td> <td>2.80</td> <td>3.12</td> <td>3.15</td> <td>4.00</td> <td>5.26</td> <td>2.95</td> <td>3.88</td> <td>5.20</td> <td>3.10</td> <td>3.94</td> <td>5.52</td> <td>5.51</td> <td>2.66</td> <td>2.21</td> <td>13.79</td> <td>4.00</td> <td>4.36</td> <td>2.70</td> </tr> <tr> <td>Rel. Inten. (% of BP)</td> <td>0.03</td> <td>5.15</td> <td>1.29</td> <td>1.02</td> <td>13.77</td> <td>100.00</td> <td>15.54</td> <td>17.28</td> <td>17.44</td> <td>22.18</td> <td>29.16</td> <td>16.34</td> <td>21.50</td> <td>28.81</td> <td>17.21</td> <td>21.81</td> <td>30.60</td> <td>30.52</td> <td>14.73</td> <td>12.23</td> <td>76.44</td> <td>22.16</td> <td>24.19</td> <td>14.96</td> </tr> <tr> <td>Score</td> <td>0.20</td> <td>0.50</td> <td>0.50</td> <td>0.22</td> <td>-0.08</td> <td>0.50</td> <td>0.50</td> <td>-0.10</td> <td>0.50</td> <td>0.75</td> <td>1.50</td> <td>-0.10</td> <td>0.75</td> <td>1.50</td> <td>1.50</td> <td>-0.13</td> <td>1.50</td> <td>1.50</td> <td>-0.09</td> <td>0.50</td> <td>1.50</td> <td>1.50</td> <td>1.50</td> <td>1.50</td> </tr> <tr> <td>Ion-type</td> <td>PR</td> <td>a1</td> <td>KQ</td> <td>LI</td> <td></td> <td>a2</td> <td>b2</td> <td></td> <td>GSE-H<sub>2</sub>O</td> <td>GSE</td> <td>y3</td> <td></td> <td>GSEL</td> <td>y5</td> <td>y8<sup>+2</sup></td> <td></td> <td>y6</td> <td>y7</td> <td></td> <td>y14-H<sub>2</sub>O<sup>+2</sup></td> <td>y14<sup>+2</sup></td> <td>y8</td> <td>y9</td> <td>y10</td> </tr> <tr> <td>Delta ppm</td> <td>-18.9</td> <td>-17.7</td> <td>-21.1</td> <td>-17.7</td> <td></td> <td>-4.6</td> <td>-12.1</td> <td></td> <td>-28.9</td> <td>-7.9</td> <td>-4.8</td> <td></td> <td>3.0</td> <td>23.2</td> <td>0.2</td> <td></td> <td>-0.5</td> <td>12.4</td> <td></td> <td>13.6</td> <td>14.1</td> <td>3.9</td> <td>2.7</td> <td>-3.6</td> </tr> </tbody> </table> |        |         |        |                  |                |                                                         |                                 |                            |                             |                    |         |             |                   |                                                                      | Fragment-ion (m/z)    | 70.064  | 72.081  | 84.079  | 86.095                | 147.104                            | 171.149               | 199.143 | 200.145  | 256.087  | 274.102 | 301.186 | 310.150 | 387.190 | 473.246 | 496.264 <sup>+2</sup> | 551.805 | 586.319 | 749.392 | 752.897 <sup>+2</sup> | 800.931 <sup>+2</sup> | 809.937 <sup>+2</sup> | 991.525 | 1119.582 | 1232.659 | Frac. Inten. (% of TIC) | 0.00 | 0.93 | 0.23 | 0.18 | 2.48 | 18.04 | 2.80 | 3.12 | 3.15 | 4.00 | 5.26 | 2.95 | 3.88 | 5.20 | 3.10 | 3.94 | 5.52 | 5.51 | 2.66 | 2.21 | 13.79 | 4.00 | 4.36 | 2.70 | Rel. Inten. (% of BP) | 0.03 | 5.15 | 1.29 | 1.02 | 13.77 | 100.00 | 15.54 | 17.28 | 17.44 | 22.18 | 29.16 | 16.34 | 21.50 | 28.81 | 17.21 | 21.81 | 30.60 | 30.52 | 14.73 | 12.23 | 76.44 | 22.16 | 24.19 | 14.96 | Score | 0.20 | 0.50 | 0.50 | 0.22 | -0.08 | 0.50 | 0.50 | -0.10 | 0.50 | 0.75 | 1.50 | -0.10 | 0.75 | 1.50 | 1.50 | -0.13 | 1.50 | 1.50 | -0.09 | 0.50 | 1.50 | 1.50 | 1.50 | 1.50 | Ion-type | PR | a1 | KQ | LI |  | a2 | b2 |  | GSE-H <sub>2</sub> O | GSE | y3 |  | GSEL | y5 | y8 <sup>+2</sup> |  | y6 | y7 |  | y14-H <sub>2</sub> O <sup>+2</sup> | y14 <sup>+2</sup> | y8 | y9 | y10 | Delta ppm | -18.9 | -17.7 | -21.1 | -17.7 |  | -4.6 | -12.1 |  | -28.9 | -7.9 | -4.8 |  | 3.0 | 23.2 | 0.2 |  | -0.5 | 12.4 |  | 13.6 | 14.1 | 3.9 | 2.7 | -3.6 |
| Fragment-ion (m/z)                                                                                                                                                                                                                                                                                                                                                                                                                                                                                                                                                                                                                                                                                                                                                                                                                                                                                                                                                                                                                                                                                                                                                                                                                                                                                                                                                                                                                                                                                                                                                                                                                                                                                                                                                                                                                                                                                                                                                                                                                                                                                                                                                                                                                                                                                                                                                                                                                                                                                                                    | 70.064 | 72.081  | 84.079 | 86.095           | 147.104        | 171.149                                                 | 199.143                         | 200.145                    | 256.087                     | 274.102            | 301.186 | 310.150     | 387.190           | 473.246                                                              | 496.264 <sup>+2</sup> | 551.805 | 586.319 | 749.392 | 752.897 <sup>+2</sup> | 800.931 <sup>+2</sup>              | 809.937 <sup>+2</sup> | 991.525 | 1119.582 | 1232.659 |         |         |         |         |         |                       |         |         |         |                       |                       |                       |         |          |          |                         |      |      |      |      |      |       |      |      |      |      |      |      |      |      |      |      |      |      |      |      |       |      |      |      |                       |      |      |      |      |       |        |       |       |       |       |       |       |       |       |       |       |       |       |       |       |       |       |       |       |       |      |      |      |      |       |      |      |       |      |      |      |       |      |      |      |       |      |      |       |      |      |      |      |      |          |    |    |    |    |  |    |    |  |                      |     |    |  |      |    |                  |  |    |    |  |                                    |                   |    |    |     |           |       |       |       |       |  |      |       |  |       |      |      |  |     |      |     |  |      |      |  |      |      |     |     |      |
| Frac. Inten. (% of TIC)                                                                                                                                                                                                                                                                                                                                                                                                                                                                                                                                                                                                                                                                                                                                                                                                                                                                                                                                                                                                                                                                                                                                                                                                                                                                                                                                                                                                                                                                                                                                                                                                                                                                                                                                                                                                                                                                                                                                                                                                                                                                                                                                                                                                                                                                                                                                                                                                                                                                                                               | 0.00   | 0.93    | 0.23   | 0.18             | 2.48           | 18.04                                                   | 2.80                            | 3.12                       | 3.15                        | 4.00               | 5.26    | 2.95        | 3.88              | 5.20                                                                 | 3.10                  | 3.94    | 5.52    | 5.51    | 2.66                  | 2.21                               | 13.79                 | 4.00    | 4.36     | 2.70     |         |         |         |         |         |                       |         |         |         |                       |                       |                       |         |          |          |                         |      |      |      |      |      |       |      |      |      |      |      |      |      |      |      |      |      |      |      |      |       |      |      |      |                       |      |      |      |      |       |        |       |       |       |       |       |       |       |       |       |       |       |       |       |       |       |       |       |       |       |      |      |      |      |       |      |      |       |      |      |      |       |      |      |      |       |      |      |       |      |      |      |      |      |          |    |    |    |    |  |    |    |  |                      |     |    |  |      |    |                  |  |    |    |  |                                    |                   |    |    |     |           |       |       |       |       |  |      |       |  |       |      |      |  |     |      |     |  |      |      |  |      |      |     |     |      |
| Rel. Inten. (% of BP)                                                                                                                                                                                                                                                                                                                                                                                                                                                                                                                                                                                                                                                                                                                                                                                                                                                                                                                                                                                                                                                                                                                                                                                                                                                                                                                                                                                                                                                                                                                                                                                                                                                                                                                                                                                                                                                                                                                                                                                                                                                                                                                                                                                                                                                                                                                                                                                                                                                                                                                 | 0.03   | 5.15    | 1.29   | 1.02             | 13.77          | 100.00                                                  | 15.54                           | 17.28                      | 17.44                       | 22.18              | 29.16   | 16.34       | 21.50             | 28.81                                                                | 17.21                 | 21.81   | 30.60   | 30.52   | 14.73                 | 12.23                              | 76.44                 | 22.16   | 24.19    | 14.96    |         |         |         |         |         |                       |         |         |         |                       |                       |                       |         |          |          |                         |      |      |      |      |      |       |      |      |      |      |      |      |      |      |      |      |      |      |      |      |       |      |      |      |                       |      |      |      |      |       |        |       |       |       |       |       |       |       |       |       |       |       |       |       |       |       |       |       |       |       |      |      |      |      |       |      |      |       |      |      |      |       |      |      |      |       |      |      |       |      |      |      |      |      |          |    |    |    |    |  |    |    |  |                      |     |    |  |      |    |                  |  |    |    |  |                                    |                   |    |    |     |           |       |       |       |       |  |      |       |  |       |      |      |  |     |      |     |  |      |      |  |      |      |     |     |      |
| Score                                                                                                                                                                                                                                                                                                                                                                                                                                                                                                                                                                                                                                                                                                                                                                                                                                                                                                                                                                                                                                                                                                                                                                                                                                                                                                                                                                                                                                                                                                                                                                                                                                                                                                                                                                                                                                                                                                                                                                                                                                                                                                                                                                                                                                                                                                                                                                                                                                                                                                                                 | 0.20   | 0.50    | 0.50   | 0.22             | -0.08          | 0.50                                                    | 0.50                            | -0.10                      | 0.50                        | 0.75               | 1.50    | -0.10       | 0.75              | 1.50                                                                 | 1.50                  | -0.13   | 1.50    | 1.50    | -0.09                 | 0.50                               | 1.50                  | 1.50    | 1.50     | 1.50     |         |         |         |         |         |                       |         |         |         |                       |                       |                       |         |          |          |                         |      |      |      |      |      |       |      |      |      |      |      |      |      |      |      |      |      |      |      |      |       |      |      |      |                       |      |      |      |      |       |        |       |       |       |       |       |       |       |       |       |       |       |       |       |       |       |       |       |       |       |      |      |      |      |       |      |      |       |      |      |      |       |      |      |      |       |      |      |       |      |      |      |      |      |          |    |    |    |    |  |    |    |  |                      |     |    |  |      |    |                  |  |    |    |  |                                    |                   |    |    |     |           |       |       |       |       |  |      |       |  |       |      |      |  |     |      |     |  |      |      |  |      |      |     |     |      |
| Ion-type                                                                                                                                                                                                                                                                                                                                                                                                                                                                                                                                                                                                                                                                                                                                                                                                                                                                                                                                                                                                                                                                                                                                                                                                                                                                                                                                                                                                                                                                                                                                                                                                                                                                                                                                                                                                                                                                                                                                                                                                                                                                                                                                                                                                                                                                                                                                                                                                                                                                                                                              | PR     | a1      | KQ     | LI               |                | a2                                                      | b2                              |                            | GSE-H <sub>2</sub> O        | GSE                | y3      |             | GSEL              | y5                                                                   | y8 <sup>+2</sup>      |         | y6      | y7      |                       | y14-H <sub>2</sub> O <sup>+2</sup> | y14 <sup>+2</sup>     | y8      | y9       | y10      |         |         |         |         |         |                       |         |         |         |                       |                       |                       |         |          |          |                         |      |      |      |      |      |       |      |      |      |      |      |      |      |      |      |      |      |      |      |      |       |      |      |      |                       |      |      |      |      |       |        |       |       |       |       |       |       |       |       |       |       |       |       |       |       |       |       |       |       |       |      |      |      |      |       |      |      |       |      |      |      |       |      |      |      |       |      |      |       |      |      |      |      |      |          |    |    |    |    |  |    |    |  |                      |     |    |  |      |    |                  |  |    |    |  |                                    |                   |    |    |     |           |       |       |       |       |  |      |       |  |       |      |      |  |     |      |     |  |      |      |  |      |      |     |     |      |
| Delta ppm                                                                                                                                                                                                                                                                                                                                                                                                                                                                                                                                                                                                                                                                                                                                                                                                                                                                                                                                                                                                                                                                                                                                                                                                                                                                                                                                                                                                                                                                                                                                                                                                                                                                                                                                                                                                                                                                                                                                                                                                                                                                                                                                                                                                                                                                                                                                                                                                                                                                                                                             | -18.9  | -17.7   | -21.1  | -17.7            |                | -4.6                                                    | -12.1                           |                            | -28.9                       | -7.9               | -4.8    |             | 3.0               | 23.2                                                                 | 0.2                   |         | -0.5    | 12.4    |                       | 13.6                               | 14.1                  | 3.9     | 2.7      | -3.6     |         |         |         |         |         |                       |         |         |         |                       |                       |                       |         |          |          |                         |      |      |      |      |      |       |      |      |      |      |      |      |      |      |      |      |      |      |      |      |       |      |      |      |                       |      |      |      |      |       |        |       |       |       |       |       |       |       |       |       |       |       |       |       |       |       |       |       |       |       |      |      |      |      |       |      |      |       |      |      |      |       |      |      |      |       |      |      |       |      |      |      |      |      |          |    |    |    |    |  |    |    |  |                      |     |    |  |      |    |                  |  |    |    |  |                                    |                   |    |    |     |           |       |       |       |       |  |      |       |  |       |      |      |  |     |      |     |  |      |      |  |      |      |     |     |      |

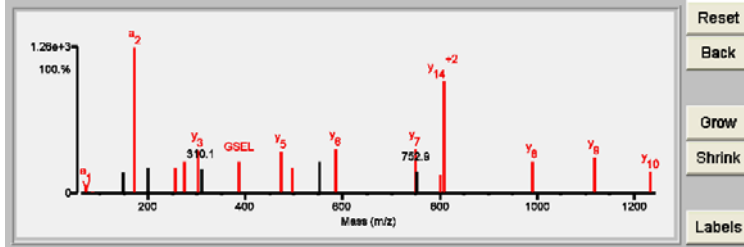

Reset

Back

Grow

Shrink

Labels

Result Summary

| Rank | Score | SPI (%) | BCS | # Unmatched Ions | Variable sites | Sequence                                  | MH <sup>+</sup> Calculated (Da) | MH <sup>+</sup> Error (Da) | MH <sup>+</sup> Error (ppm) | Protein MW/pl (Da) | Species | Accession # | Protein Name                                                         |
|------|-------|---------|-----|------------------|----------------|-------------------------------------------|---------------------------------|----------------------------|-----------------------------|--------------------|---------|-------------|----------------------------------------------------------------------|
| 1    | 21.06 | 96.0    | 10  | 2/25             | K210k          | (R)FVNLGI <sup>+</sup> PPKGVLLFGPPGTGK(T) | 2237.2693                       | 114.0422                   | -0.3                        | 48634.1/5.71       | HUMAN   | P35998      | 26S protease regulatory subunit 7 OS=Homo sapiens GN=PSMC2 PE=1 SV=3 |
| 2    | 10.39 | 62.3    | 5   | 10/25            | K222k          | (R)FVNLGI <sup>+</sup> PPKGVLLFGPPGTGK(T) | 2237.2693                       | 114.0422                   | -0.3                        | 48634.1/5.71       | HUMAN   | P35998      | 26S protease regulatory subunit 7 OS=Homo sapiens GN=PSMC2 PE=1 SV=3 |

Detailed Results

| Rank                    | Score | SPI (%) | BCS | # Unmatched Ions | Variable sites | Sequence                                  | MH <sup>+</sup> Calculated (Da) | MH <sup>+</sup> Error (Da) | MH <sup>+</sup> Error (ppm) | Protein MW/pl (Da) | Species | Accession # | MS-Digest Index # | Protein Name                                                         |         |         |         |                       |         |                   |         |         |                       |                       |         |                       |         |                       |         |                       |                        |      |
|-------------------------|-------|---------|-----|------------------|----------------|-------------------------------------------|---------------------------------|----------------------------|-----------------------------|--------------------|---------|-------------|-------------------|----------------------------------------------------------------------|---------|---------|---------|-----------------------|---------|-------------------|---------|---------|-----------------------|-----------------------|---------|-----------------------|---------|-----------------------|---------|-----------------------|------------------------|------|
| 1                       | 21.06 | 96.0    | 10  | 2/25             | K210k          | (R)FVNLGI <sup>+</sup> PPKGVLLFGPPGTGK(T) | 2237.2693                       | 114.0422                   | -0.3                        | 48634.1/5.71       | HUMAN   | P35998      | 520926            | 26S protease regulatory subunit 7 OS=Homo sapiens GN=PSMC2 PE=1 SV=3 |         |         |         |                       |         |                   |         |         |                       |                       |         |                       |         |                       |         |                       |                        |      |
| Fragment-ion (m/z)      |       |         |     |                  |                |                                           | 72.082                          | 84.082                     | 86.097                      | 120.079            | 219.149 | 247.147     | 361.191           | 474.272                                                              | 556.311 | 593.336 | 613.331 | 674.359 <sup>+2</sup> | 706.424 | 741.429           | 756.394 | 760.400 | 786.944 <sup>+2</sup> | 789.953 <sup>+2</sup> | 819.504 | 845.468 <sup>+2</sup> | 873.481 | 939.519 <sup>+2</sup> | 986.567 | 987.556 <sup>+2</sup> | 1053.078 <sup>+2</sup> |      |
| Frac. Inten. (% of TIC) |       |         |     |                  |                |                                           | 0.07                            | 0.07                       | 0.24                        | 0.09               | 3.87    | 2.32        | 6.36              | 2.21                                                                 | 4.69    | 2.57    | 9.58    | 1.79                  | 3.15    | 1.88              | 3.91    | 6.18    | 1.69                  | 23.85                 | 2.30    | 4.24                  | 3.89    | 7.61                  | 1.81    | 2.56                  | 3.06                   |      |
| Rel. Inten. (% of BP)   |       |         |     |                  |                |                                           | 0.30                            | 0.30                       | 1.01                        | 0.38               | 16.21   | 9.73        | 26.65             | 9.28                                                                 | 19.68   | 10.79   | 40.15   | 7.51                  | 13.22   | 7.88              | 16.38   | 25.89   | 7.06                  | 100.00                | 9.64    | 17.78                 | 16.32   | 31.92                 | 7.59    | 10.75                 | 12.83                  |      |
| Score                   |       |         |     |                  |                |                                           | 0.50                            | 0.50                       | 0.22                        | 1.00               | 0.50    | 0.50        | 0.50              | 1.50                                                                 | 0.75    | 1.50    | 0.25    | 1.50                  | 0.75    | 1.50              | 0.25    | 1.50    | 0.25                  | 1.50                  | 0.25    | 1.50                  | 0.25    | 1.50                  | 0.50    | 1.50                  | 0.50                   | 1.50 |
| Ion-type                |       |         |     |                  |                |                                           | V                               | KQ                         | LI                          | a1                 | a2      | b2          | b3                | b4                                                                   | y6      | PPKGV   | y7      | b12-H2O <sup>+2</sup> | PPKGV   | y <sup>++14</sup> | b7-NH3  | y8      |                       | y15 <sup>+2</sup>     |         | y16-H2O <sup>+2</sup> | y9      | y18 <sup>+2</sup>     | y10     | y19-NH3 <sup>+2</sup> | y20 <sup>+2</sup>      |      |
| Delta ppm               |       |         |     |                  |                |                                           | 11.4                            | 8.6                        | 9.0                         | -25.6              | -5.0    | 8.1         | 8.2               | 0.2                                                                  | 3.5     | -9.0    | 0.3     | -23.8                 | -1.7    | 2.2               | 0.2     | 1.0     |                       | -1.0                  |         | -1.7                  | -2.2    | -9.4                  | 0.5     | -1.1                  | -12.8                  |      |

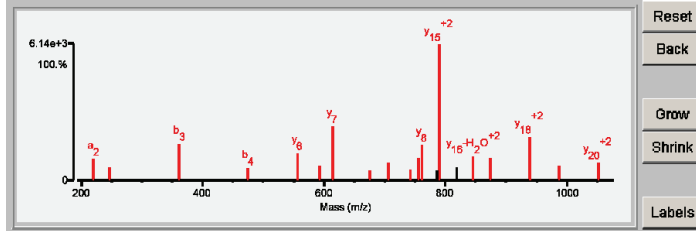

Result Summary

| Rank | Score | SPI (%) | BCS | Unmatched Ions | # Variable sites | Sequence                         | MH <sup>+</sup> Calculated (Da) | MH <sup>+</sup> Error (Da) | MH <sup>+</sup> Error (ppm) | Protein MW/pl (Da) | Species | Accession # | Protein Name                                                         |
|------|-------|---------|-----|----------------|------------------|----------------------------------|---------------------------------|----------------------------|-----------------------------|--------------------|---------|-------------|----------------------------------------------------------------------|
| 1    | 10.94 | 65.2    | 8   | 12/25          | K210k K222k      | (R)FVNLGIEPPKGVLLFGPPGTGKTLCA(R) | 2838.5699                       | 228.0947                   | 2.9                         | 48634.1/5.71       | HUMAN   | P35998      | 26S protease regulatory subunit 7 OS=Homo sapiens GN=PSMC2 PE=1 SV=3 |

Detailed Results

| Rank | Score | SPI (%) | BCS | Unmatched Ions | # Variable sites | Sequence                         | MH <sup>+</sup> Calculated (Da) | MH <sup>+</sup> Error (Da) | MH <sup>+</sup> Error (ppm) | Protein MW/pl (Da) | Species | Accession # | MS-Digest Index # | Protein Name                                                         |
|------|-------|---------|-----|----------------|------------------|----------------------------------|---------------------------------|----------------------------|-----------------------------|--------------------|---------|-------------|-------------------|----------------------------------------------------------------------|
| 1    | 10.94 | 65.2    | 8   | 12/25          | K210k K222k      | (R)FVNLGIEPPKGVLLFGPPGTGKTLCA(R) | 2838.5699                       | 228.0947                   | 2.9                         | 48634.1/5.71       | HUMAN   | P35998      | 520925            | 26S protease regulatory subunit 7 OS=Homo sapiens GN=PSMC2 PE=1 SV=3 |

  

| Fragment-ion (m/z)      | 70.066 | 86.093 | 120.079        | 219.145        | 247.147        | 361.183        | 408.225 | 489.271 | 555.272 <sup>+2</sup> | 593.335 | 636.320 <sup>+2</sup>         | 664.856 <sup>+2</sup>         | 729.866 | 732.420 | 738.390          | 738.850 | 754.410 <sup>+2</sup> | 794.913 <sup>+2</sup>         | 819.514 | 820.878 <sup>+2</sup> | 849.765 | 865.482 <sup>+3</sup> | 1024.591 | 1147.648 <sup>+2</sup>        | 1174.571        |
|-------------------------|--------|--------|----------------|----------------|----------------|----------------|---------|---------|-----------------------|---------|-------------------------------|-------------------------------|---------|---------|------------------|---------|-----------------------|-------------------------------|---------|-----------------------|---------|-----------------------|----------|-------------------------------|-----------------|
| Frac. Inten. (% of TIC) | 0.01   | 0.31   | 0.16           | 4.22           | 3.12           | 10.14          | 2.47    | 2.54    | 2.51                  | 2.37    | 15.59                         | 5.15                          | 2.85    | 2.43    | 7.39             | 2.81    | 3.04                  | 3.29                          | 4.09    | 3.87                  | 2.56    | 2.98                  | 2.65     | 5.42                          | 8.04            |
| Rel. Inten. (% of BP)   | 0.06   | 1.99   | 1.01           | 27.10          | 20.01          | 65.03          | 15.82   | 16.30   | 16.08                 | 15.20   | 100.00                        | 33.04                         | 18.47   | 15.56   | 47.43            | 18.04   | 19.49                 | 21.09                         | 25.25   | 24.82                 | 16.41   | 19.12                 | 17.00    | 34.75                         | 51.57           |
| Score                   | 0.20   | 0.22   | 1.00           | 0.50           | 0.50           | 0.50           | -0.16   | -0.16   | -0.16                 | 0.75    | 1.50                          | 1.50                          | -0.18   | -0.16   | 1.50             | -0.18   | -0.19                 | 1.50                          | -0.26   | -0.25                 | -0.16   | -0.19                 | -0.17    | 1.50                          | 1.50            |
| Ion-type                | PR     | LI     | a <sub>1</sub> | a <sub>2</sub> | b <sub>2</sub> | b <sub>3</sub> |         |         |                       | PPKGV   | y <sub>11</sub> <sup>+2</sup> | y <sub>12</sub> <sup>+2</sup> |         |         | y <sup>+13</sup> |         |                       | y <sub>14</sub> <sup>+2</sup> |         |                       |         |                       |          | y <sub>20</sub> <sup>+2</sup> | y <sub>10</sub> |
| Delta ppm               | 8.2    | -35.1  | -27.3          | -23.2          | 6.1            | -15.0          |         |         |                       | -11.4   | -15.7                         | 22.7                          |         |         | 20.6             |         |                       | -5.5                          |         |                       |         |                       |          | 19.5                          | -24.9           |

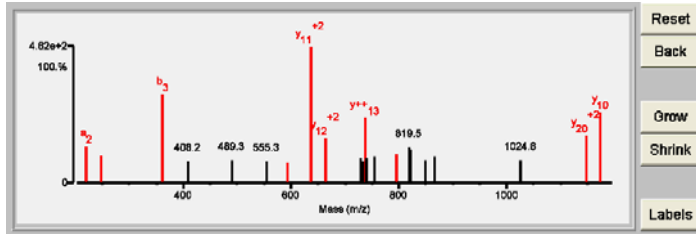

Result Summary

| Rank | Score | SPI (%) | BCS | # Unmatched Ions | Variable sites | Sequence               | MH <sup>+</sup> Calculated (Da) | MH <sup>+</sup> Error (Da) | MH <sup>+</sup> Error (ppm) | Protein MW/pI (Da) | Species | Accession # | Protein Name                                                         |
|------|-------|---------|-----|------------------|----------------|------------------------|---------------------------------|----------------------------|-----------------------------|--------------------|---------|-------------|----------------------------------------------------------------------|
| 1    | 13.24 | 76.9    | 7   | 10/25            | K222k          | (K)GVLLFGPPGTGKTLCA(A) | 1743.9574                       | 114.0577                   | 8.0                         | 48634.1/5.71       | HUMAN   | P35998      | 26S protease regulatory subunit 7 OS=Homo sapiens GN=PSMC2 PE=1 SV=3 |

Detailed Results

| Rank                                                                                                                                                                                                                                                                                                                                                                                                                                                                                                                                                                                                                                                                                                                                                                                                                                                                                                                                                                                                                                                                                                                                                                                                                                                                                                                                                                                                                                                                                                                                                                                                                                                                                                                                                                                                                                                                                                                                                                                                                                                                                                                                                                                                                                                                                                                                                                                                                                                                                                                                                                                                                                                                                                                           | Score  | SPI (%) | BCS    | # Unmatched Ions | Variable sites | Sequence               | MH <sup>+</sup> Calculated (Da) | MH <sup>+</sup> Error (Da) | MH <sup>+</sup> Error (ppm) | Protein MW/pI (Da) | Species | Accession #    | MS-Digest Index #                               | Protein Name                                                         |                    |         |                               |         |                               |                  |         |                               |                       |                |                 |         |         |                       |         |         |         |                       |         |                       |         |         |                       |                       |          |          |                        |      |      |      |      |      |      |      |      |      |      |      |      |      |      |      |      |       |      |       |      |      |      |      |      |      |                      |      |      |      |      |       |      |      |       |       |       |      |       |      |       |      |      |        |      |       |       |       |       |      |      |       |       |      |       |      |       |      |      |       |      |      |       |       |      |      |      |       |       |      |       |      |      |       |      |       |      |      |          |    |  |    |  |       |                |  |    |                |  |  |                |                                                 |                  |  |  |                               |  |                               |                  |  |                               |  |                |                 |           |      |  |       |  |       |       |  |       |       |  |  |     |     |     |  |  |      |  |     |      |  |     |  |     |       |
|--------------------------------------------------------------------------------------------------------------------------------------------------------------------------------------------------------------------------------------------------------------------------------------------------------------------------------------------------------------------------------------------------------------------------------------------------------------------------------------------------------------------------------------------------------------------------------------------------------------------------------------------------------------------------------------------------------------------------------------------------------------------------------------------------------------------------------------------------------------------------------------------------------------------------------------------------------------------------------------------------------------------------------------------------------------------------------------------------------------------------------------------------------------------------------------------------------------------------------------------------------------------------------------------------------------------------------------------------------------------------------------------------------------------------------------------------------------------------------------------------------------------------------------------------------------------------------------------------------------------------------------------------------------------------------------------------------------------------------------------------------------------------------------------------------------------------------------------------------------------------------------------------------------------------------------------------------------------------------------------------------------------------------------------------------------------------------------------------------------------------------------------------------------------------------------------------------------------------------------------------------------------------------------------------------------------------------------------------------------------------------------------------------------------------------------------------------------------------------------------------------------------------------------------------------------------------------------------------------------------------------------------------------------------------------------------------------------------------------|--------|---------|--------|------------------|----------------|------------------------|---------------------------------|----------------------------|-----------------------------|--------------------|---------|----------------|-------------------------------------------------|----------------------------------------------------------------------|--------------------|---------|-------------------------------|---------|-------------------------------|------------------|---------|-------------------------------|-----------------------|----------------|-----------------|---------|---------|-----------------------|---------|---------|---------|-----------------------|---------|-----------------------|---------|---------|-----------------------|-----------------------|----------|----------|------------------------|------|------|------|------|------|------|------|------|------|------|------|------|------|------|------|------|-------|------|-------|------|------|------|------|------|------|----------------------|------|------|------|------|-------|------|------|-------|-------|-------|------|-------|------|-------|------|------|--------|------|-------|-------|-------|-------|------|------|-------|-------|------|-------|------|-------|------|------|-------|------|------|-------|-------|------|------|------|-------|-------|------|-------|------|------|-------|------|-------|------|------|----------|----|--|----|--|-------|----------------|--|----|----------------|--|--|----------------|-------------------------------------------------|------------------|--|--|-------------------------------|--|-------------------------------|------------------|--|-------------------------------|--|----------------|-----------------|-----------|------|--|-------|--|-------|-------|--|-------|-------|--|--|-----|-----|-----|--|--|------|--|-----|------|--|-----|--|-----|-------|
| 1                                                                                                                                                                                                                                                                                                                                                                                                                                                                                                                                                                                                                                                                                                                                                                                                                                                                                                                                                                                                                                                                                                                                                                                                                                                                                                                                                                                                                                                                                                                                                                                                                                                                                                                                                                                                                                                                                                                                                                                                                                                                                                                                                                                                                                                                                                                                                                                                                                                                                                                                                                                                                                                                                                                              | 13.24  | 76.9    | 7      | 10/25            | K222k          | (K)GVLLFGPPGTGKTLCA(A) | 1743.9574                       | 114.0577                   | 8.0                         | 48634.1/5.71       | HUMAN   | P35998         | 520925                                          | 26S protease regulatory subunit 7 OS=Homo sapiens GN=PSMC2 PE=1 SV=3 |                    |         |                               |         |                               |                  |         |                               |                       |                |                 |         |         |                       |         |         |         |                       |         |                       |         |         |                       |                       |          |          |                        |      |      |      |      |      |      |      |      |      |      |      |      |      |      |      |      |       |      |       |      |      |      |      |      |      |                      |      |      |      |      |       |      |      |       |       |       |      |       |      |       |      |      |        |      |       |       |       |       |      |      |       |       |      |       |      |       |      |      |       |      |      |       |       |      |      |      |       |       |      |       |      |      |       |      |       |      |      |          |    |  |    |  |       |                |  |    |                |  |  |                |                                                 |                  |  |  |                               |  |                               |                  |  |                               |  |                |                 |           |      |  |       |  |       |       |  |       |       |  |  |     |     |     |  |  |      |  |     |      |  |     |  |     |       |
| <table border="1"> <thead> <tr> <th>Fragment-ion (m/z)</th> <th>70.064</th> <th>84.079</th> <th>86.095</th> <th>87.099</th> <th>127.085</th> <th>129.100</th> <th>136.073</th> <th>155.079</th> <th>157.094</th> <th>187.142</th> <th>225.155</th> <th>270.183</th> <th>578.803<sup>+2</sup></th> <th>587.804</th> <th>588.308</th> <th>601.315</th> <th>636.329<sup>+2</sup></th> <th>655.356</th> <th>664.843<sup>+2</sup></th> <th>738.369</th> <th>738.889</th> <th>794.922<sup>+2</sup></th> <th>851.936<sup>+2</sup></th> <th>1077.548</th> <th>1174.585</th> </tr> </thead> <tbody> <tr> <td>Frac. Inten.(% of TIC)</td> <td>0.01</td> <td>1.61</td> <td>0.47</td> <td>2.36</td> <td>3.46</td> <td>2.17</td> <td>1.64</td> <td>3.85</td> <td>3.27</td> <td>3.57</td> <td>1.69</td> <td>5.23</td> <td>1.88</td> <td>3.72</td> <td>1.61</td> <td>1.67</td> <td>24.79</td> <td>2.37</td> <td>13.60</td> <td>3.87</td> <td>4.88</td> <td>3.39</td> <td>1.65</td> <td>1.56</td> <td>5.69</td> </tr> <tr> <td>Rel. Inten.(% of BP)</td> <td>0.02</td> <td>6.49</td> <td>1.88</td> <td>9.52</td> <td>13.97</td> <td>8.74</td> <td>6.63</td> <td>15.52</td> <td>13.18</td> <td>14.38</td> <td>6.83</td> <td>21.10</td> <td>7.58</td> <td>15.01</td> <td>6.48</td> <td>6.72</td> <td>100.00</td> <td>9.55</td> <td>54.83</td> <td>15.60</td> <td>19.70</td> <td>13.68</td> <td>6.67</td> <td>6.29</td> <td>22.95</td> </tr> <tr> <td>Score</td> <td>0.20</td> <td>-0.06</td> <td>0.22</td> <td>-0.10</td> <td>0.50</td> <td>0.50</td> <td>-0.07</td> <td>0.75</td> <td>0.50</td> <td>-0.14</td> <td>-0.07</td> <td>0.50</td> <td>0.50</td> <td>1.50</td> <td>-0.06</td> <td>-0.07</td> <td>1.50</td> <td>-0.10</td> <td>1.50</td> <td>1.50</td> <td>-0.20</td> <td>1.50</td> <td>-0.07</td> <td>1.50</td> <td>1.50</td> </tr> <tr> <td>Ion-type</td> <td>PR</td> <td></td> <td>LI</td> <td></td> <td>PG-28</td> <td>a<sub>2</sub></td> <td></td> <td>PG</td> <td>b<sub>2</sub></td> <td></td> <td></td> <td>b<sub>3</sub></td> <td>y<sub>10</sub>-H<sub>2</sub>O<sup>+2</sup></td> <td>y<sup>+10</sup></td> <td></td> <td></td> <td>y<sub>11</sub><sup>+2</sup></td> <td></td> <td>y<sub>12</sub><sup>+2</sup></td> <td>y<sup>+13</sup></td> <td></td> <td>y<sub>14</sub><sup>+2</sup></td> <td></td> <td>y<sub>9</sub></td> <td>y<sub>10</sub></td> </tr> <tr> <td>Delta ppm</td> <td>-8.9</td> <td></td> <td>-14.2</td> <td></td> <td>-20.4</td> <td>-22.7</td> <td></td> <td>-23.2</td> <td>-29.6</td> <td></td> <td></td> <td>1.4</td> <td>8.6</td> <td>0.2</td> <td></td> <td></td> <td>-1.2</td> <td></td> <td>3.0</td> <td>-8.6</td> <td></td> <td>6.9</td> <td></td> <td>1.0</td> <td>-12.9</td> </tr> </tbody> </table> |        |         |        |                  |                |                        |                                 |                            |                             |                    |         |                |                                                 |                                                                      | Fragment-ion (m/z) | 70.064  | 84.079                        | 86.095  | 87.099                        | 127.085          | 129.100 | 136.073                       | 155.079               | 157.094        | 187.142         | 225.155 | 270.183 | 578.803 <sup>+2</sup> | 587.804 | 588.308 | 601.315 | 636.329 <sup>+2</sup> | 655.356 | 664.843 <sup>+2</sup> | 738.369 | 738.889 | 794.922 <sup>+2</sup> | 851.936 <sup>+2</sup> | 1077.548 | 1174.585 | Frac. Inten.(% of TIC) | 0.01 | 1.61 | 0.47 | 2.36 | 3.46 | 2.17 | 1.64 | 3.85 | 3.27 | 3.57 | 1.69 | 5.23 | 1.88 | 3.72 | 1.61 | 1.67 | 24.79 | 2.37 | 13.60 | 3.87 | 4.88 | 3.39 | 1.65 | 1.56 | 5.69 | Rel. Inten.(% of BP) | 0.02 | 6.49 | 1.88 | 9.52 | 13.97 | 8.74 | 6.63 | 15.52 | 13.18 | 14.38 | 6.83 | 21.10 | 7.58 | 15.01 | 6.48 | 6.72 | 100.00 | 9.55 | 54.83 | 15.60 | 19.70 | 13.68 | 6.67 | 6.29 | 22.95 | Score | 0.20 | -0.06 | 0.22 | -0.10 | 0.50 | 0.50 | -0.07 | 0.75 | 0.50 | -0.14 | -0.07 | 0.50 | 0.50 | 1.50 | -0.06 | -0.07 | 1.50 | -0.10 | 1.50 | 1.50 | -0.20 | 1.50 | -0.07 | 1.50 | 1.50 | Ion-type | PR |  | LI |  | PG-28 | a <sub>2</sub> |  | PG | b <sub>2</sub> |  |  | b <sub>3</sub> | y <sub>10</sub> -H <sub>2</sub> O <sup>+2</sup> | y <sup>+10</sup> |  |  | y <sub>11</sub> <sup>+2</sup> |  | y <sub>12</sub> <sup>+2</sup> | y <sup>+13</sup> |  | y <sub>14</sub> <sup>+2</sup> |  | y <sub>9</sub> | y <sub>10</sub> | Delta ppm | -8.9 |  | -14.2 |  | -20.4 | -22.7 |  | -23.2 | -29.6 |  |  | 1.4 | 8.6 | 0.2 |  |  | -1.2 |  | 3.0 | -8.6 |  | 6.9 |  | 1.0 | -12.9 |
| Fragment-ion (m/z)                                                                                                                                                                                                                                                                                                                                                                                                                                                                                                                                                                                                                                                                                                                                                                                                                                                                                                                                                                                                                                                                                                                                                                                                                                                                                                                                                                                                                                                                                                                                                                                                                                                                                                                                                                                                                                                                                                                                                                                                                                                                                                                                                                                                                                                                                                                                                                                                                                                                                                                                                                                                                                                                                                             | 70.064 | 84.079  | 86.095 | 87.099           | 127.085        | 129.100                | 136.073                         | 155.079                    | 157.094                     | 187.142            | 225.155 | 270.183        | 578.803 <sup>+2</sup>                           | 587.804                                                              | 588.308            | 601.315 | 636.329 <sup>+2</sup>         | 655.356 | 664.843 <sup>+2</sup>         | 738.369          | 738.889 | 794.922 <sup>+2</sup>         | 851.936 <sup>+2</sup> | 1077.548       | 1174.585        |         |         |                       |         |         |         |                       |         |                       |         |         |                       |                       |          |          |                        |      |      |      |      |      |      |      |      |      |      |      |      |      |      |      |      |       |      |       |      |      |      |      |      |      |                      |      |      |      |      |       |      |      |       |       |       |      |       |      |       |      |      |        |      |       |       |       |       |      |      |       |       |      |       |      |       |      |      |       |      |      |       |       |      |      |      |       |       |      |       |      |      |       |      |       |      |      |          |    |  |    |  |       |                |  |    |                |  |  |                |                                                 |                  |  |  |                               |  |                               |                  |  |                               |  |                |                 |           |      |  |       |  |       |       |  |       |       |  |  |     |     |     |  |  |      |  |     |      |  |     |  |     |       |
| Frac. Inten.(% of TIC)                                                                                                                                                                                                                                                                                                                                                                                                                                                                                                                                                                                                                                                                                                                                                                                                                                                                                                                                                                                                                                                                                                                                                                                                                                                                                                                                                                                                                                                                                                                                                                                                                                                                                                                                                                                                                                                                                                                                                                                                                                                                                                                                                                                                                                                                                                                                                                                                                                                                                                                                                                                                                                                                                                         | 0.01   | 1.61    | 0.47   | 2.36             | 3.46           | 2.17                   | 1.64                            | 3.85                       | 3.27                        | 3.57               | 1.69    | 5.23           | 1.88                                            | 3.72                                                                 | 1.61               | 1.67    | 24.79                         | 2.37    | 13.60                         | 3.87             | 4.88    | 3.39                          | 1.65                  | 1.56           | 5.69            |         |         |                       |         |         |         |                       |         |                       |         |         |                       |                       |          |          |                        |      |      |      |      |      |      |      |      |      |      |      |      |      |      |      |      |       |      |       |      |      |      |      |      |      |                      |      |      |      |      |       |      |      |       |       |       |      |       |      |       |      |      |        |      |       |       |       |       |      |      |       |       |      |       |      |       |      |      |       |      |      |       |       |      |      |      |       |       |      |       |      |      |       |      |       |      |      |          |    |  |    |  |       |                |  |    |                |  |  |                |                                                 |                  |  |  |                               |  |                               |                  |  |                               |  |                |                 |           |      |  |       |  |       |       |  |       |       |  |  |     |     |     |  |  |      |  |     |      |  |     |  |     |       |
| Rel. Inten.(% of BP)                                                                                                                                                                                                                                                                                                                                                                                                                                                                                                                                                                                                                                                                                                                                                                                                                                                                                                                                                                                                                                                                                                                                                                                                                                                                                                                                                                                                                                                                                                                                                                                                                                                                                                                                                                                                                                                                                                                                                                                                                                                                                                                                                                                                                                                                                                                                                                                                                                                                                                                                                                                                                                                                                                           | 0.02   | 6.49    | 1.88   | 9.52             | 13.97          | 8.74                   | 6.63                            | 15.52                      | 13.18                       | 14.38              | 6.83    | 21.10          | 7.58                                            | 15.01                                                                | 6.48               | 6.72    | 100.00                        | 9.55    | 54.83                         | 15.60            | 19.70   | 13.68                         | 6.67                  | 6.29           | 22.95           |         |         |                       |         |         |         |                       |         |                       |         |         |                       |                       |          |          |                        |      |      |      |      |      |      |      |      |      |      |      |      |      |      |      |      |       |      |       |      |      |      |      |      |      |                      |      |      |      |      |       |      |      |       |       |       |      |       |      |       |      |      |        |      |       |       |       |       |      |      |       |       |      |       |      |       |      |      |       |      |      |       |       |      |      |      |       |       |      |       |      |      |       |      |       |      |      |          |    |  |    |  |       |                |  |    |                |  |  |                |                                                 |                  |  |  |                               |  |                               |                  |  |                               |  |                |                 |           |      |  |       |  |       |       |  |       |       |  |  |     |     |     |  |  |      |  |     |      |  |     |  |     |       |
| Score                                                                                                                                                                                                                                                                                                                                                                                                                                                                                                                                                                                                                                                                                                                                                                                                                                                                                                                                                                                                                                                                                                                                                                                                                                                                                                                                                                                                                                                                                                                                                                                                                                                                                                                                                                                                                                                                                                                                                                                                                                                                                                                                                                                                                                                                                                                                                                                                                                                                                                                                                                                                                                                                                                                          | 0.20   | -0.06   | 0.22   | -0.10            | 0.50           | 0.50                   | -0.07                           | 0.75                       | 0.50                        | -0.14              | -0.07   | 0.50           | 0.50                                            | 1.50                                                                 | -0.06              | -0.07   | 1.50                          | -0.10   | 1.50                          | 1.50             | -0.20   | 1.50                          | -0.07                 | 1.50           | 1.50            |         |         |                       |         |         |         |                       |         |                       |         |         |                       |                       |          |          |                        |      |      |      |      |      |      |      |      |      |      |      |      |      |      |      |      |       |      |       |      |      |      |      |      |      |                      |      |      |      |      |       |      |      |       |       |       |      |       |      |       |      |      |        |      |       |       |       |       |      |      |       |       |      |       |      |       |      |      |       |      |      |       |       |      |      |      |       |       |      |       |      |      |       |      |       |      |      |          |    |  |    |  |       |                |  |    |                |  |  |                |                                                 |                  |  |  |                               |  |                               |                  |  |                               |  |                |                 |           |      |  |       |  |       |       |  |       |       |  |  |     |     |     |  |  |      |  |     |      |  |     |  |     |       |
| Ion-type                                                                                                                                                                                                                                                                                                                                                                                                                                                                                                                                                                                                                                                                                                                                                                                                                                                                                                                                                                                                                                                                                                                                                                                                                                                                                                                                                                                                                                                                                                                                                                                                                                                                                                                                                                                                                                                                                                                                                                                                                                                                                                                                                                                                                                                                                                                                                                                                                                                                                                                                                                                                                                                                                                                       | PR     |         | LI     |                  | PG-28          | a <sub>2</sub>         |                                 | PG                         | b <sub>2</sub>              |                    |         | b <sub>3</sub> | y <sub>10</sub> -H <sub>2</sub> O <sup>+2</sup> | y <sup>+10</sup>                                                     |                    |         | y <sub>11</sub> <sup>+2</sup> |         | y <sub>12</sub> <sup>+2</sup> | y <sup>+13</sup> |         | y <sub>14</sub> <sup>+2</sup> |                       | y <sub>9</sub> | y <sub>10</sub> |         |         |                       |         |         |         |                       |         |                       |         |         |                       |                       |          |          |                        |      |      |      |      |      |      |      |      |      |      |      |      |      |      |      |      |       |      |       |      |      |      |      |      |      |                      |      |      |      |      |       |      |      |       |       |       |      |       |      |       |      |      |        |      |       |       |       |       |      |      |       |       |      |       |      |       |      |      |       |      |      |       |       |      |      |      |       |       |      |       |      |      |       |      |       |      |      |          |    |  |    |  |       |                |  |    |                |  |  |                |                                                 |                  |  |  |                               |  |                               |                  |  |                               |  |                |                 |           |      |  |       |  |       |       |  |       |       |  |  |     |     |     |  |  |      |  |     |      |  |     |  |     |       |
| Delta ppm                                                                                                                                                                                                                                                                                                                                                                                                                                                                                                                                                                                                                                                                                                                                                                                                                                                                                                                                                                                                                                                                                                                                                                                                                                                                                                                                                                                                                                                                                                                                                                                                                                                                                                                                                                                                                                                                                                                                                                                                                                                                                                                                                                                                                                                                                                                                                                                                                                                                                                                                                                                                                                                                                                                      | -8.9   |         | -14.2  |                  | -20.4          | -22.7                  |                                 | -23.2                      | -29.6                       |                    |         | 1.4            | 8.6                                             | 0.2                                                                  |                    |         | -1.2                          |         | 3.0                           | -8.6             |         | 6.9                           |                       | 1.0            | -12.9           |         |         |                       |         |         |         |                       |         |                       |         |         |                       |                       |          |          |                        |      |      |      |      |      |      |      |      |      |      |      |      |      |      |      |      |       |      |       |      |      |      |      |      |      |                      |      |      |      |      |       |      |      |       |       |       |      |       |      |       |      |      |        |      |       |       |       |       |      |      |       |       |      |       |      |       |      |      |       |      |      |       |       |      |      |      |       |       |      |       |      |      |       |      |       |      |      |          |    |  |    |  |       |                |  |    |                |  |  |                |                                                 |                  |  |  |                               |  |                               |                  |  |                               |  |                |                 |           |      |  |       |  |       |       |  |       |       |  |  |     |     |     |  |  |      |  |     |      |  |     |  |     |       |

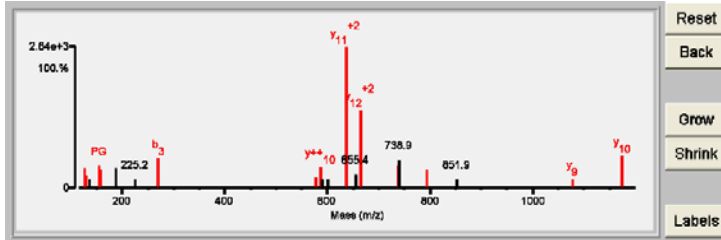

Result Summary

| Rank | Score | SPI (%) | BCS | # Unmatched Ions | Variable sites | Sequence               | MH <sup>+</sup> Calculated (Da) | MH <sup>+</sup> Error (Da) | MH <sup>+</sup> Error (ppm) | Protein MW/pI (Da) | Species | Accession # | Protein Name                                                                         |
|------|-------|---------|-----|------------------|----------------|------------------------|---------------------------------|----------------------------|-----------------------------|--------------------|---------|-------------|--------------------------------------------------------------------------------------|
| 1    | 17.56 | 85.3    | 8   | 6/25             | K248k          | (R)VGSELVQkYVGEGAR(M)  | 1704.9279                       | 114.0731                   | 16.6                        | 48634.1/5.71       | HUMAN   | P35998      | 26S protease regulatory subunit 7 OS=Homo sapiens GN=PSMC2 PE=1 SV=3                 |
| 2    | 5.86  | 53.5    | 1   | 11/25            | None           | (K)EIVTNIQRGFIESGKK(D) | 1819.0072                       | -0.0062                    | -3.4                        | 94048.1/7.97       | HUMAN   | Q5TYW2      | Ankyrin repeat domain-containing protein 20A1 OS=Homo sapiens GN=ANKRD20A1 PE=2 SV=1 |
| 2    | 5.86  | 53.5    | 1   | 11/25            | None           | (K)EIVTNIQRGFIESGKK(D) | 1819.0072                       | -0.0062                    | -3.4                        | 94087.1/8.12       | HUMAN   | Q5SQ80      | Ankyrin repeat domain-containing protein 20A2 OS=Homo sapiens GN=ANKRD20A2 PE=2 SV=1 |
| 2    | 5.86  | 53.5    | 1   | 11/25            | None           | (K)EIVTNIQRGFIESGKK(D) | 1819.0072                       | -0.0062                    | -3.4                        | 94108.1/8.12       | HUMAN   | Q5VUR7      | Ankyrin repeat domain-containing protein 20A3 OS=Homo sapiens GN=ANKRD20A3 PE=4 SV=1 |
| 2    | 5.86  | 53.5    | 1   | 11/25            | None           | (K)EIVTNIQRGFIESGKK(D) | 1819.0072                       | -0.0062                    | -3.4                        | 94149.2/8.11       | HUMAN   | Q4UJ75      | Ankyrin repeat domain-containing protein 20A4 OS=Homo sapiens GN=ANKRD20A4 PE=2 SV=1 |

Detailed Results

| Rank | Score | SPI (%) | BCS | # Unmatched Ions | Variable sites | Sequence                                            | MH <sup>+</sup> Calculated (Da) | MH <sup>+</sup> Error (Da) | MH <sup>+</sup> Error (ppm) | Protein MW/pI (Da) | Species | Accession # | MS-Digest Index # | Protein Name                                                         |
|------|-------|---------|-----|------------------|----------------|-----------------------------------------------------|---------------------------------|----------------------------|-----------------------------|--------------------|---------|-------------|-------------------|----------------------------------------------------------------------|
| 1    | 17.56 | 85.3    | 8   | 6/25             | K248k          | (R) V I G S E L V Q / k / Y / V / G E / G A / R (M) | 1704.9279                       | 114.0731                   | 16.6                        | 48634.1/5.71       | HUMAN   | P35998      | 520925            | 26S protease regulatory subunit 7 OS=Homo sapiens GN=PSMC2 PE=1 SV=3 |

  

| Fragment-ion (m/z)     | 70.064 | 72.081 | 84.080 | 86.096 | 87.096 | 120.080 | 136.079 | 141.101 | 175.119 | 185.166 | 213.159 | 243.142 | 256.094 | 274.106 | 303.174 | 354.170 | 387.195 | 489.249 | 515.266 | 588.312 | 632.370 | 751.377           | 803.920 <sup>+2</sup> | 993.514 | 1121.583 |
|------------------------|--------|--------|--------|--------|--------|---------|---------|---------|---------|---------|---------|---------|---------|---------|---------|---------|---------|---------|---------|---------|---------|-------------------|-----------------------|---------|----------|
| Frac. Inten.(% of TIC) | 0.00   | 0.61   | 0.36   | 0.97   | 2.53   | 3.44    | 0.15    | 3.30    | 4.73    | 20.37   | 3.66    | 3.31    | 3.84    | 3.27    | 3.58    | 2.60    | 3.64    | 9.13    | 2.48    | 5.63    | 3.21    | 6.24              | 6.63                  | 2.60    | 3.72     |
| Rel. Inten.(% of BP)   | 0.02   | 3.00   | 1.75   | 4.75   | 12.41  | 16.87   | 0.74    | 16.20   | 23.24   | 100.00  | 17.98   | 16.25   | 18.84   | 16.05   | 17.59   | 12.74   | 17.86   | 44.80   | 12.17   | 27.61   | 15.78   | 30.64             | 32.55                 | 12.74   | 18.24    |
| Score                  | 0.20   | 0.50   | 0.50   | 0.22   | -0.12  | -0.17   | 1.00    | -0.16   | 1.50    | 0.50    | 0.75    | 0.75    | 0.50    | 0.75    | 1.50    | -0.13   | 0.75    | 1.50    | -0.12   | 1.50    | -0.16   | 1.50              | 1.50                  | 1.50    | 1.50     |
| Ion-type               | PR     | a1     | KQ     | LI     |        | Y       |         | y1      | a2      | b2      | EL      | GSE-H2O | GSE     | y3      |         | GSEL    | y5      |         | y6      |         | y7      | y14 <sup>+2</sup> | y8                    | y9      |          |
| Delta ppm              | -18.9  | -17.7  | -4.5   | -6.1   |        | 23.6    |         | -0.9    | -1.3    | -7.7    | 28.3    | -0.8    | 4.2     | -12.3   |         | 17.2    | 14.7    |         | 3.2     |         | 5.2     | 9.6               | 2.5                   | 12.1    |          |

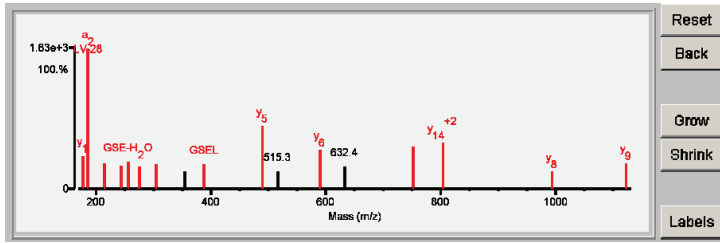

Reset

Back

Grow

Shrink

Labels



Result Summary

| Rank | Score | SPI (%) | BCS | # Unmatched Ions | Variable sites | Sequence                 | MH <sup>+</sup> Calculated (Da) | MH <sup>+</sup> Error (Da) | MH <sup>+</sup> Error (ppm) | Protein MW/pl (Da) | Species | Accession # | Protein Name                                                                      |
|------|-------|---------|-----|------------------|----------------|--------------------------|---------------------------------|----------------------------|-----------------------------|--------------------|---------|-------------|-----------------------------------------------------------------------------------|
| 1    | 12.49 | 69.4    | 6   | 9/25             | K310k          | (K)TSSAFVGGKTPAESPEPK(D) | 1732.8752                       | 114.0432                   | 0.2                         | 105836.9/5.25      | HUMAN   | Q99460      | 26S proteasome non-ATPase regulatory subunit 1 OS=Homo sapiens GN=PSMD1 PE=1 SV=2 |

Detailed Results

| Rank                                                                                                                                                                                                                                                                                                                                                                                                                                                                                                                                                                                                                                                                                                                                                                                                                                                                                                                                                                                                                                                                                                                                                                                                                                                                                                                                                                                                                                                                                                                                                                                                                                                                                                                                                                                                                                                                                                                                                                                                                                                                                                                                                                                                                                                                                                                                                                                                                                                                                                                                                                                                                                                                                                   | Score  | SPI (%) | BCS    | # Unmatched Ions | Variable sites               | Sequence                 | MH <sup>+</sup> Calculated (Da) | MH <sup>+</sup> Error (Da) | MH <sup>+</sup> Error (ppm)     | Protein MW/pl (Da) | Species | Accession #    | MS-Digest Index #                | Protein Name                                                                      |                    |         |                              |         |                       |                       |         |         |         |                |                |                 |         |         |         |         |         |         |         |                       |                       |         |         |         |         |          |                        |      |      |      |      |      |      |      |      |      |      |      |      |      |      |      |      |      |      |      |      |      |      |      |      |      |                      |       |      |      |        |      |       |       |      |       |       |       |       |       |       |       |       |       |       |       |       |       |       |       |       |       |       |       |      |      |      |      |       |       |      |      |      |       |      |      |      |       |       |      |       |      |      |       |       |      |      |      |          |  |    |   |  |                |    |  |   |                                 |                |  |                |                                  |                                  |  |  |                              |  |  |  |  |  |  |                |                |                 |           |  |      |       |       |                              |     |  |       |       |     |  |     |       |       |  |  |     |  |  |  |  |  |  |       |      |       |
|--------------------------------------------------------------------------------------------------------------------------------------------------------------------------------------------------------------------------------------------------------------------------------------------------------------------------------------------------------------------------------------------------------------------------------------------------------------------------------------------------------------------------------------------------------------------------------------------------------------------------------------------------------------------------------------------------------------------------------------------------------------------------------------------------------------------------------------------------------------------------------------------------------------------------------------------------------------------------------------------------------------------------------------------------------------------------------------------------------------------------------------------------------------------------------------------------------------------------------------------------------------------------------------------------------------------------------------------------------------------------------------------------------------------------------------------------------------------------------------------------------------------------------------------------------------------------------------------------------------------------------------------------------------------------------------------------------------------------------------------------------------------------------------------------------------------------------------------------------------------------------------------------------------------------------------------------------------------------------------------------------------------------------------------------------------------------------------------------------------------------------------------------------------------------------------------------------------------------------------------------------------------------------------------------------------------------------------------------------------------------------------------------------------------------------------------------------------------------------------------------------------------------------------------------------------------------------------------------------------------------------------------------------------------------------------------------------|--------|---------|--------|------------------|------------------------------|--------------------------|---------------------------------|----------------------------|---------------------------------|--------------------|---------|----------------|----------------------------------|-----------------------------------------------------------------------------------|--------------------|---------|------------------------------|---------|-----------------------|-----------------------|---------|---------|---------|----------------|----------------|-----------------|---------|---------|---------|---------|---------|---------|---------|-----------------------|-----------------------|---------|---------|---------|---------|----------|------------------------|------|------|------|------|------|------|------|------|------|------|------|------|------|------|------|------|------|------|------|------|------|------|------|------|------|----------------------|-------|------|------|--------|------|-------|-------|------|-------|-------|-------|-------|-------|-------|-------|-------|-------|-------|-------|-------|-------|-------|-------|-------|-------|-------|-------|------|------|------|------|-------|-------|------|------|------|-------|------|------|------|-------|-------|------|-------|------|------|-------|-------|------|------|------|----------|--|----|---|--|----------------|----|--|---|---------------------------------|----------------|--|----------------|----------------------------------|----------------------------------|--|--|------------------------------|--|--|--|--|--|--|----------------|----------------|-----------------|-----------|--|------|-------|-------|------------------------------|-----|--|-------|-------|-----|--|-----|-------|-------|--|--|-----|--|--|--|--|--|--|-------|------|-------|
| 1                                                                                                                                                                                                                                                                                                                                                                                                                                                                                                                                                                                                                                                                                                                                                                                                                                                                                                                                                                                                                                                                                                                                                                                                                                                                                                                                                                                                                                                                                                                                                                                                                                                                                                                                                                                                                                                                                                                                                                                                                                                                                                                                                                                                                                                                                                                                                                                                                                                                                                                                                                                                                                                                                                      | 12.49  | 69.4    | 6      | 9/25             | K310k                        | (K)TSSAFVGGKTPAESPEPK(D) | 1732.8752                       | 114.0432                   | 0.2                             | 105836.9/5.25      | HUMAN   | Q99460         | 265435                           | 26S proteasome non-ATPase regulatory subunit 1 OS=Homo sapiens GN=PSMD1 PE=1 SV=2 |                    |         |                              |         |                       |                       |         |         |         |                |                |                 |         |         |         |         |         |         |         |                       |                       |         |         |         |         |          |                        |      |      |      |      |      |      |      |      |      |      |      |      |      |      |      |      |      |      |      |      |      |      |      |      |      |                      |       |      |      |        |      |       |       |      |       |       |       |       |       |       |       |       |       |       |       |       |       |       |       |       |       |       |       |      |      |      |      |       |       |      |      |      |       |      |      |      |       |       |      |       |      |      |       |       |      |      |      |          |  |    |   |  |                |    |  |   |                                 |                |  |                |                                  |                                  |  |  |                              |  |  |  |  |  |  |                |                |                 |           |  |      |       |       |                              |     |  |       |       |     |  |     |       |       |  |  |     |  |  |  |  |  |  |       |      |       |
| <table border="1"> <thead> <tr> <th>Fragment-ion (m/z)</th> <th>60.041</th> <th>70.065</th> <th>72.079</th> <th>74.060</th> <th>84.081</th> <th>110.068</th> <th>116.071</th> <th>120.077</th> <th>130.083</th> <th>161.094</th> <th>191.114</th> <th>244.167</th> <th>258.105</th> <th>329.142</th> <th>383.194</th> <th>385.155</th> <th>427.720</th> <th>619.307</th> <th>627.816<sup>+2</sup></th> <th>677.364<sup>+2</sup></th> <th>681.277</th> <th>774.373</th> <th>854.407</th> <th>955.484</th> <th>1254.609</th> </tr> </thead> <tbody> <tr> <td>Frac. Inten.(% of TIC)</td> <td>3.29</td> <td>0.00</td> <td>0.09</td> <td>9.53</td> <td>0.31</td> <td>2.94</td> <td>3.01</td> <td>0.15</td> <td>3.28</td> <td>4.05</td> <td>2.90</td> <td>6.85</td> <td>3.30</td> <td>6.19</td> <td>3.10</td> <td>2.94</td> <td>8.07</td> <td>3.42</td> <td>7.23</td> <td>2.98</td> <td>5.69</td> <td>3.36</td> <td>7.91</td> <td>5.84</td> <td>3.58</td> </tr> <tr> <td>Rel. Inten.(% of BP)</td> <td>34.53</td> <td>0.04</td> <td>0.92</td> <td>100.00</td> <td>3.26</td> <td>30.88</td> <td>31.54</td> <td>1.60</td> <td>34.43</td> <td>42.49</td> <td>30.41</td> <td>71.84</td> <td>34.59</td> <td>64.88</td> <td>32.47</td> <td>30.85</td> <td>84.64</td> <td>35.82</td> <td>75.82</td> <td>31.21</td> <td>59.67</td> <td>35.26</td> <td>82.95</td> <td>61.23</td> <td>37.51</td> </tr> <tr> <td>Score</td> <td>-0.35</td> <td>0.20</td> <td>0.50</td> <td>1.50</td> <td>0.50</td> <td>-0.31</td> <td>-0.32</td> <td>1.00</td> <td>0.50</td> <td>0.50</td> <td>-0.30</td> <td>1.50</td> <td>0.25</td> <td>0.25</td> <td>-0.32</td> <td>-0.31</td> <td>1.50</td> <td>-0.36</td> <td>1.50</td> <td>1.50</td> <td>-0.60</td> <td>-0.35</td> <td>1.50</td> <td>1.50</td> <td>1.50</td> </tr> <tr> <td>Ion-type</td> <td></td> <td>PR</td> <td>V</td> <td></td> <td>a<sub>1</sub></td> <td>KQ</td> <td></td> <td>F</td> <td>y<sub>1</sub>-NH<sub>3</sub></td> <td>a<sub>2</sub></td> <td></td> <td>y<sub>2</sub></td> <td>b<sub>3</sub>-H<sub>2</sub>O</td> <td>b<sub>4</sub>-H<sub>2</sub>O</td> <td></td> <td></td> <td>y<sup>++</sup><sub>8</sub></td> <td></td> <td></td> <td></td> <td></td> <td></td> <td></td> <td>y<sub>8</sub></td> <td>y<sub>9</sub></td> <td>y<sub>11</sub></td> </tr> <tr> <td>Delta ppm</td> <td></td> <td>-6.1</td> <td>-23.2</td> <td>-12.7</td> <td>y<sup>++</sup><sub>1</sub></td> <td>5.0</td> <td></td> <td>-29.8</td> <td>-21.2</td> <td>7.0</td> <td></td> <td>5.9</td> <td>-19.2</td> <td>-14.5</td> <td></td> <td></td> <td>9.0</td> <td></td> <td></td> <td></td> <td></td> <td></td> <td></td> <td>-21.7</td> <td>11.0</td> <td>-18.9</td> </tr> </tbody> </table> |        |         |        |                  |                              |                          |                                 |                            |                                 |                    |         |                |                                  |                                                                                   | Fragment-ion (m/z) | 60.041  | 70.065                       | 72.079  | 74.060                | 84.081                | 110.068 | 116.071 | 120.077 | 130.083        | 161.094        | 191.114         | 244.167 | 258.105 | 329.142 | 383.194 | 385.155 | 427.720 | 619.307 | 627.816 <sup>+2</sup> | 677.364 <sup>+2</sup> | 681.277 | 774.373 | 854.407 | 955.484 | 1254.609 | Frac. Inten.(% of TIC) | 3.29 | 0.00 | 0.09 | 9.53 | 0.31 | 2.94 | 3.01 | 0.15 | 3.28 | 4.05 | 2.90 | 6.85 | 3.30 | 6.19 | 3.10 | 2.94 | 8.07 | 3.42 | 7.23 | 2.98 | 5.69 | 3.36 | 7.91 | 5.84 | 3.58 | Rel. Inten.(% of BP) | 34.53 | 0.04 | 0.92 | 100.00 | 3.26 | 30.88 | 31.54 | 1.60 | 34.43 | 42.49 | 30.41 | 71.84 | 34.59 | 64.88 | 32.47 | 30.85 | 84.64 | 35.82 | 75.82 | 31.21 | 59.67 | 35.26 | 82.95 | 61.23 | 37.51 | Score | -0.35 | 0.20 | 0.50 | 1.50 | 0.50 | -0.31 | -0.32 | 1.00 | 0.50 | 0.50 | -0.30 | 1.50 | 0.25 | 0.25 | -0.32 | -0.31 | 1.50 | -0.36 | 1.50 | 1.50 | -0.60 | -0.35 | 1.50 | 1.50 | 1.50 | Ion-type |  | PR | V |  | a <sub>1</sub> | KQ |  | F | y <sub>1</sub> -NH <sub>3</sub> | a <sub>2</sub> |  | y <sub>2</sub> | b <sub>3</sub> -H <sub>2</sub> O | b <sub>4</sub> -H <sub>2</sub> O |  |  | y <sup>++</sup> <sub>8</sub> |  |  |  |  |  |  | y <sub>8</sub> | y <sub>9</sub> | y <sub>11</sub> | Delta ppm |  | -6.1 | -23.2 | -12.7 | y <sup>++</sup> <sub>1</sub> | 5.0 |  | -29.8 | -21.2 | 7.0 |  | 5.9 | -19.2 | -14.5 |  |  | 9.0 |  |  |  |  |  |  | -21.7 | 11.0 | -18.9 |
| Fragment-ion (m/z)                                                                                                                                                                                                                                                                                                                                                                                                                                                                                                                                                                                                                                                                                                                                                                                                                                                                                                                                                                                                                                                                                                                                                                                                                                                                                                                                                                                                                                                                                                                                                                                                                                                                                                                                                                                                                                                                                                                                                                                                                                                                                                                                                                                                                                                                                                                                                                                                                                                                                                                                                                                                                                                                                     | 60.041 | 70.065  | 72.079 | 74.060           | 84.081                       | 110.068                  | 116.071                         | 120.077                    | 130.083                         | 161.094            | 191.114 | 244.167        | 258.105                          | 329.142                                                                           | 383.194            | 385.155 | 427.720                      | 619.307 | 627.816 <sup>+2</sup> | 677.364 <sup>+2</sup> | 681.277 | 774.373 | 854.407 | 955.484        | 1254.609       |                 |         |         |         |         |         |         |         |                       |                       |         |         |         |         |          |                        |      |      |      |      |      |      |      |      |      |      |      |      |      |      |      |      |      |      |      |      |      |      |      |      |      |                      |       |      |      |        |      |       |       |      |       |       |       |       |       |       |       |       |       |       |       |       |       |       |       |       |       |       |       |      |      |      |      |       |       |      |      |      |       |      |      |      |       |       |      |       |      |      |       |       |      |      |      |          |  |    |   |  |                |    |  |   |                                 |                |  |                |                                  |                                  |  |  |                              |  |  |  |  |  |  |                |                |                 |           |  |      |       |       |                              |     |  |       |       |     |  |     |       |       |  |  |     |  |  |  |  |  |  |       |      |       |
| Frac. Inten.(% of TIC)                                                                                                                                                                                                                                                                                                                                                                                                                                                                                                                                                                                                                                                                                                                                                                                                                                                                                                                                                                                                                                                                                                                                                                                                                                                                                                                                                                                                                                                                                                                                                                                                                                                                                                                                                                                                                                                                                                                                                                                                                                                                                                                                                                                                                                                                                                                                                                                                                                                                                                                                                                                                                                                                                 | 3.29   | 0.00    | 0.09   | 9.53             | 0.31                         | 2.94                     | 3.01                            | 0.15                       | 3.28                            | 4.05               | 2.90    | 6.85           | 3.30                             | 6.19                                                                              | 3.10               | 2.94    | 8.07                         | 3.42    | 7.23                  | 2.98                  | 5.69    | 3.36    | 7.91    | 5.84           | 3.58           |                 |         |         |         |         |         |         |         |                       |                       |         |         |         |         |          |                        |      |      |      |      |      |      |      |      |      |      |      |      |      |      |      |      |      |      |      |      |      |      |      |      |      |                      |       |      |      |        |      |       |       |      |       |       |       |       |       |       |       |       |       |       |       |       |       |       |       |       |       |       |       |      |      |      |      |       |       |      |      |      |       |      |      |      |       |       |      |       |      |      |       |       |      |      |      |          |  |    |   |  |                |    |  |   |                                 |                |  |                |                                  |                                  |  |  |                              |  |  |  |  |  |  |                |                |                 |           |  |      |       |       |                              |     |  |       |       |     |  |     |       |       |  |  |     |  |  |  |  |  |  |       |      |       |
| Rel. Inten.(% of BP)                                                                                                                                                                                                                                                                                                                                                                                                                                                                                                                                                                                                                                                                                                                                                                                                                                                                                                                                                                                                                                                                                                                                                                                                                                                                                                                                                                                                                                                                                                                                                                                                                                                                                                                                                                                                                                                                                                                                                                                                                                                                                                                                                                                                                                                                                                                                                                                                                                                                                                                                                                                                                                                                                   | 34.53  | 0.04    | 0.92   | 100.00           | 3.26                         | 30.88                    | 31.54                           | 1.60                       | 34.43                           | 42.49              | 30.41   | 71.84          | 34.59                            | 64.88                                                                             | 32.47              | 30.85   | 84.64                        | 35.82   | 75.82                 | 31.21                 | 59.67   | 35.26   | 82.95   | 61.23          | 37.51          |                 |         |         |         |         |         |         |         |                       |                       |         |         |         |         |          |                        |      |      |      |      |      |      |      |      |      |      |      |      |      |      |      |      |      |      |      |      |      |      |      |      |      |                      |       |      |      |        |      |       |       |      |       |       |       |       |       |       |       |       |       |       |       |       |       |       |       |       |       |       |       |      |      |      |      |       |       |      |      |      |       |      |      |      |       |       |      |       |      |      |       |       |      |      |      |          |  |    |   |  |                |    |  |   |                                 |                |  |                |                                  |                                  |  |  |                              |  |  |  |  |  |  |                |                |                 |           |  |      |       |       |                              |     |  |       |       |     |  |     |       |       |  |  |     |  |  |  |  |  |  |       |      |       |
| Score                                                                                                                                                                                                                                                                                                                                                                                                                                                                                                                                                                                                                                                                                                                                                                                                                                                                                                                                                                                                                                                                                                                                                                                                                                                                                                                                                                                                                                                                                                                                                                                                                                                                                                                                                                                                                                                                                                                                                                                                                                                                                                                                                                                                                                                                                                                                                                                                                                                                                                                                                                                                                                                                                                  | -0.35  | 0.20    | 0.50   | 1.50             | 0.50                         | -0.31                    | -0.32                           | 1.00                       | 0.50                            | 0.50               | -0.30   | 1.50           | 0.25                             | 0.25                                                                              | -0.32              | -0.31   | 1.50                         | -0.36   | 1.50                  | 1.50                  | -0.60   | -0.35   | 1.50    | 1.50           | 1.50           |                 |         |         |         |         |         |         |         |                       |                       |         |         |         |         |          |                        |      |      |      |      |      |      |      |      |      |      |      |      |      |      |      |      |      |      |      |      |      |      |      |      |      |                      |       |      |      |        |      |       |       |      |       |       |       |       |       |       |       |       |       |       |       |       |       |       |       |       |       |       |       |      |      |      |      |       |       |      |      |      |       |      |      |      |       |       |      |       |      |      |       |       |      |      |      |          |  |    |   |  |                |    |  |   |                                 |                |  |                |                                  |                                  |  |  |                              |  |  |  |  |  |  |                |                |                 |           |  |      |       |       |                              |     |  |       |       |     |  |     |       |       |  |  |     |  |  |  |  |  |  |       |      |       |
| Ion-type                                                                                                                                                                                                                                                                                                                                                                                                                                                                                                                                                                                                                                                                                                                                                                                                                                                                                                                                                                                                                                                                                                                                                                                                                                                                                                                                                                                                                                                                                                                                                                                                                                                                                                                                                                                                                                                                                                                                                                                                                                                                                                                                                                                                                                                                                                                                                                                                                                                                                                                                                                                                                                                                                               |        | PR      | V      |                  | a <sub>1</sub>               | KQ                       |                                 | F                          | y <sub>1</sub> -NH <sub>3</sub> | a <sub>2</sub>     |         | y <sub>2</sub> | b <sub>3</sub> -H <sub>2</sub> O | b <sub>4</sub> -H <sub>2</sub> O                                                  |                    |         | y <sup>++</sup> <sub>8</sub> |         |                       |                       |         |         |         | y <sub>8</sub> | y <sub>9</sub> | y <sub>11</sub> |         |         |         |         |         |         |         |                       |                       |         |         |         |         |          |                        |      |      |      |      |      |      |      |      |      |      |      |      |      |      |      |      |      |      |      |      |      |      |      |      |      |                      |       |      |      |        |      |       |       |      |       |       |       |       |       |       |       |       |       |       |       |       |       |       |       |       |       |       |       |      |      |      |      |       |       |      |      |      |       |      |      |      |       |       |      |       |      |      |       |       |      |      |      |          |  |    |   |  |                |    |  |   |                                 |                |  |                |                                  |                                  |  |  |                              |  |  |  |  |  |  |                |                |                 |           |  |      |       |       |                              |     |  |       |       |     |  |     |       |       |  |  |     |  |  |  |  |  |  |       |      |       |
| Delta ppm                                                                                                                                                                                                                                                                                                                                                                                                                                                                                                                                                                                                                                                                                                                                                                                                                                                                                                                                                                                                                                                                                                                                                                                                                                                                                                                                                                                                                                                                                                                                                                                                                                                                                                                                                                                                                                                                                                                                                                                                                                                                                                                                                                                                                                                                                                                                                                                                                                                                                                                                                                                                                                                                                              |        | -6.1    | -23.2  | -12.7            | y <sup>++</sup> <sub>1</sub> | 5.0                      |                                 | -29.8                      | -21.2                           | 7.0                |         | 5.9            | -19.2                            | -14.5                                                                             |                    |         | 9.0                          |         |                       |                       |         |         |         | -21.7          | 11.0           | -18.9           |         |         |         |         |         |         |         |                       |                       |         |         |         |         |          |                        |      |      |      |      |      |      |      |      |      |      |      |      |      |      |      |      |      |      |      |      |      |      |      |      |      |                      |       |      |      |        |      |       |       |      |       |       |       |       |       |       |       |       |       |       |       |       |       |       |       |       |       |       |       |      |      |      |      |       |       |      |      |      |       |      |      |      |       |       |      |       |      |      |       |       |      |      |      |          |  |    |   |  |                |    |  |   |                                 |                |  |                |                                  |                                  |  |  |                              |  |  |  |  |  |  |                |                |                 |           |  |      |       |       |                              |     |  |       |       |     |  |     |       |       |  |  |     |  |  |  |  |  |  |       |      |       |

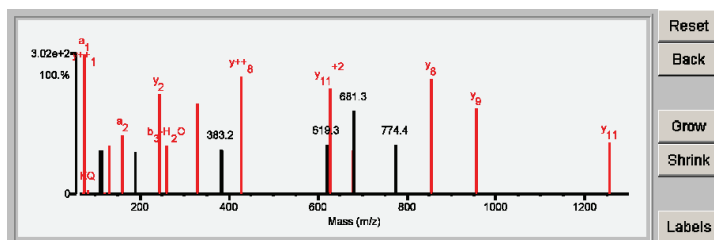

Reset

Back

Grow

Shrink

Labels

Result Summary

| Rank | Score | SPI (%) | BCS | # Unmatched Ions | Variable sites | Sequence                                           | MH <sup>+</sup> Calculated (Da) | MH <sup>+</sup> Error (Da) | MH <sup>+</sup> Error (ppm) | Protein MW/pI (Da) | Species | Accession # | Protein Name                                                                      |
|------|-------|---------|-----|------------------|----------------|----------------------------------------------------|---------------------------------|----------------------------|-----------------------------|--------------------|---------|-------------|-----------------------------------------------------------------------------------|
| 1    | 15.10 | 73.2    | 7   | 9/25             | K122k          | (R)IIAFVGS <del>P</del> VEDNEKDLV <del>K</del> (L) | 1973.0590                       | 114.0560                   | 6.2                         | 40736.9/4.68       | HUMAN   | P55036      | 26S proteasome non-ATPase regulatory subunit 4 OS=Homo sapiens GN=PSMD4 PE=1 SV=1 |
| 2    | 11.77 | 67.9    | 5   | 11/25            | K126k          | (R)IIAFVGS <del>P</del> VEDNEKDLV <del>K</del> (L) | 1973.0590                       | 114.0560                   | 6.2                         | 40736.9/4.68       | HUMAN   | P55036      | 26S proteasome non-ATPase regulatory subunit 4 OS=Homo sapiens GN=PSMD4 PE=1 SV=1 |
| 3    | 3.24  | 56.0    | 3   | 17/25            | M409m K401k    | (K)LLAQKAAEAQEMQR <del>K</del> (A)                 | 1957.0535                       | 130.0614                   | 11.3                        | 69690.6/6.11       | HUMAN   | P35240      | Merlin OS=Homo sapiens GN=NF2 PE=1 SV=1                                           |

Detailed Results

| Rank | Score | SPI (%) | BCS | # Unmatched Ions | Variable sites | Sequence                                           | MH <sup>+</sup> Calculated (Da) | MH <sup>+</sup> Error (Da) | MH <sup>+</sup> Error (ppm) | Protein MW/pI (Da) | Species | Accession # | MS-Digest Index # | Protein Name                                                                      |
|------|-------|---------|-----|------------------|----------------|----------------------------------------------------|---------------------------------|----------------------------|-----------------------------|--------------------|---------|-------------|-------------------|-----------------------------------------------------------------------------------|
| 1    | 15.10 | 73.2    | 7   | 9/25             | K122k          | (R)IIAFVGS <del>P</del> VEDNEKDLV <del>K</del> (L) | 1973.0590                       | 114.0560                   | 6.2                         | 40736.9/4.68       | HUMAN   | P55036      | 530917            | 26S proteasome non-ATPase regulatory subunit 4 OS=Homo sapiens GN=PSMD4 PE=1 SV=1 |

  

| Fragment-ion (m/z)     | 70.062 | 84.075 | 86.094 | 120.079 | 191.116 | 199.180 | 219.108 | 227.171 | 246.182 | 298.210 | 359.269 | 364.199 | 445.273 | 468.249           | 700.356 <sup>+2</sup> | 744.378           | 772.375 <sup>+2</sup> | 773.389 <sup>+2</sup> | 813.411          | 821.923 | 822.405 | 895.456 <sup>+2</sup> | 930.980          | 931.461 | 1399.689 |
|------------------------|--------|--------|--------|---------|---------|---------|---------|---------|---------|---------|---------|---------|---------|-------------------|-----------------------|-------------------|-----------------------|-----------------------|------------------|---------|---------|-----------------------|------------------|---------|----------|
| Frac. Inten.(% of TIC) | 2.66   | 1.76   | 11.19  | 0.05    | 2.02    | 16.22   | 2.30    | 5.08    | 2.22    | 2.80    | 3.04    | 1.80    | 1.98    | 1.88              | 8.19                  | 1.89              | 2.25                  | 2.94                  | 1.76             | 3.06    | 3.18    | 5.33                  | 5.16             | 8.96    | 2.27     |
| Rel. Inten.(% of BP)   | 16.41  | 10.84  | 68.96  | 0.33    | 12.44   | 100.00  | 14.17   | 31.32   | 13.71   | 17.23   | 18.73   | 11.08   | 12.23   | 11.62             | 50.49                 | 11.65             | 13.84                 | 18.15                 | 10.86            | 18.87   | 19.60   | 32.84                 | 31.78            | 55.20   | 14.01    |
| Score                  | -0.16  | -0.11  | 0.50   |         | 1.00    | 0.50    | 0.75    | 0.50    | 1.50    | 0.50    | 1.50    | -0.11   | 0.50    | -0.12             | 1.50                  | -0.12             | 1.50                  | -0.18                 | -0.11            | 1.50    | -0.20   | 1.50                  | 1.50             | -0.55   | 1.50     |
| Ion-type               |        |        | a1     | F       | AF      | z       | AF      | b2      | y2      | b3      | y3      |         | b4      | y11 <sup>+2</sup> |                       | y13 <sup>+2</sup> |                       |                       | y <sup>+14</sup> |         |         | y15 <sup>+2</sup>     | y <sup>+16</sup> | y11     |          |
| Delta ppm              |        |        | -31.7  | -17.3   | -9.4    | -0.5    | -22.8   | -19.8   | 2.8     | -8.1    | 11.7    |         | -18.7   |                   | -0.7                  |                   | -11.5                 |                       |                  | 6.4     |         | 4.7                   | 10.3             | -12.8   |          |

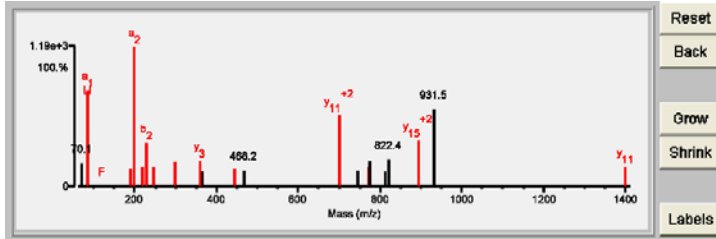

Result Summary

| Rank | Score | SPI (%) | BCS | # Unmatched Ions | Variable sites | Sequence                                | MH <sup>+</sup> Calculated (Da) | MH <sup>+</sup> Error (Da) | MH <sup>+</sup> Error (ppm) | Protein MW/pI (Da) | Species | Accession # | Protein Name                                                                      |
|------|-------|---------|-----|------------------|----------------|-----------------------------------------|---------------------------------|----------------------------|-----------------------------|--------------------|---------|-------------|-----------------------------------------------------------------------------------|
| 1    | 17.20 | 72.3    | 10  | 6/25             | K40k           | (R) L Q A Q D A V N I V C H S K T R (S) | 1968.0080                       | 114.0582                   | 7.3                         | 40736.9/4.68       | HUMAN   | P55036      | 26S proteasome non-ATPase regulatory subunit 4 OS=Homo sapiens GN=PSMD4 PE=1 SV=1 |

Detailed Results

| Rank                                                                                                                                                                                                                                                                                                                                                                                                                                                                                                                                                                                                                                                                                                                                                                                                                                                                                                                                                                                                                                                                                                                                                                                                                                                                                                                                                                                                                                                                                                                                                                                                                                                                                                                                                                                                                                                                                                                                                                                                                                                                                                                                                                                                                                                                                                                                                                                                                                                                                                                                                                                                                                                                                                                                               | Score  | SPI (%) | BCS    | # Unmatched Ions | Variable sites | Sequence                                | MH <sup>+</sup> Calculated (Da) | MH <sup>+</sup> Error (Da) | MH <sup>+</sup> Error (ppm) | Protein MW/pI (Da) | Species | Accession # | MS-Digest Index # | Protein Name                                                                      |                    |         |                              |                              |                              |                |                              |                               |                |                |                |         |         |         |         |         |         |                       |                       |         |         |                       |                       |         |         |          |                        |      |      |      |      |       |      |      |      |      |      |      |      |      |      |      |      |      |      |      |      |      |      |      |      |      |                      |      |      |       |      |        |      |       |      |       |       |       |       |       |       |       |       |       |       |       |       |       |       |       |       |       |       |      |      |       |      |      |      |       |      |       |      |       |       |      |      |      |       |      |      |      |      |      |      |      |      |      |          |    |   |  |    |                |   |  |     |                |  |  |  |                |                |     |  |                              |                              |                              |                |                              |                               |                |                |                |           |      |      |  |      |       |       |  |       |  |     |  |  |       |       |      |  |      |      |     |     |     |     |      |      |     |
|----------------------------------------------------------------------------------------------------------------------------------------------------------------------------------------------------------------------------------------------------------------------------------------------------------------------------------------------------------------------------------------------------------------------------------------------------------------------------------------------------------------------------------------------------------------------------------------------------------------------------------------------------------------------------------------------------------------------------------------------------------------------------------------------------------------------------------------------------------------------------------------------------------------------------------------------------------------------------------------------------------------------------------------------------------------------------------------------------------------------------------------------------------------------------------------------------------------------------------------------------------------------------------------------------------------------------------------------------------------------------------------------------------------------------------------------------------------------------------------------------------------------------------------------------------------------------------------------------------------------------------------------------------------------------------------------------------------------------------------------------------------------------------------------------------------------------------------------------------------------------------------------------------------------------------------------------------------------------------------------------------------------------------------------------------------------------------------------------------------------------------------------------------------------------------------------------------------------------------------------------------------------------------------------------------------------------------------------------------------------------------------------------------------------------------------------------------------------------------------------------------------------------------------------------------------------------------------------------------------------------------------------------------------------------------------------------------------------------------------------------|--------|---------|--------|------------------|----------------|-----------------------------------------|---------------------------------|----------------------------|-----------------------------|--------------------|---------|-------------|-------------------|-----------------------------------------------------------------------------------|--------------------|---------|------------------------------|------------------------------|------------------------------|----------------|------------------------------|-------------------------------|----------------|----------------|----------------|---------|---------|---------|---------|---------|---------|-----------------------|-----------------------|---------|---------|-----------------------|-----------------------|---------|---------|----------|------------------------|------|------|------|------|-------|------|------|------|------|------|------|------|------|------|------|------|------|------|------|------|------|------|------|------|------|----------------------|------|------|-------|------|--------|------|-------|------|-------|-------|-------|-------|-------|-------|-------|-------|-------|-------|-------|-------|-------|-------|-------|-------|-------|-------|------|------|-------|------|------|------|-------|------|-------|------|-------|-------|------|------|------|-------|------|------|------|------|------|------|------|------|------|----------|----|---|--|----|----------------|---|--|-----|----------------|--|--|--|----------------|----------------|-----|--|------------------------------|------------------------------|------------------------------|----------------|------------------------------|-------------------------------|----------------|----------------|----------------|-----------|------|------|--|------|-------|-------|--|-------|--|-----|--|--|-------|-------|------|--|------|------|-----|-----|-----|-----|------|------|-----|
| 1                                                                                                                                                                                                                                                                                                                                                                                                                                                                                                                                                                                                                                                                                                                                                                                                                                                                                                                                                                                                                                                                                                                                                                                                                                                                                                                                                                                                                                                                                                                                                                                                                                                                                                                                                                                                                                                                                                                                                                                                                                                                                                                                                                                                                                                                                                                                                                                                                                                                                                                                                                                                                                                                                                                                                  | 17.20  | 72.3    | 10     | 6/25             | K40k           | (R) L Q A Q D A V N I V C H S K T R (S) | 1968.0080                       | 114.0582                   | 7.3                         | 40736.9/4.68       | HUMAN   | P55036      | 530917            | 26S proteasome non-ATPase regulatory subunit 4 OS=Homo sapiens GN=PSMD4 PE=1 SV=1 |                    |         |                              |                              |                              |                |                              |                               |                |                |                |         |         |         |         |         |         |                       |                       |         |         |                       |                       |         |         |          |                        |      |      |      |      |       |      |      |      |      |      |      |      |      |      |      |      |      |      |      |      |      |      |      |      |      |                      |      |      |       |      |        |      |       |      |       |       |       |       |       |       |       |       |       |       |       |       |       |       |       |       |       |       |      |      |       |      |      |      |       |      |       |      |       |       |      |      |      |       |      |      |      |      |      |      |      |      |      |          |    |   |  |    |                |   |  |     |                |  |  |  |                |                |     |  |                              |                              |                              |                |                              |                               |                |                |                |           |      |      |  |      |       |       |  |       |  |     |  |  |       |       |      |  |      |      |     |     |     |     |      |      |     |
| <table border="1"> <thead> <tr> <th>Fragment-ion (m/z)</th> <th>70.065</th> <th>72.081</th> <th>84.044</th> <th>84.080</th> <th>86.096</th> <th>110.070</th> <th>120.078</th> <th>129.101</th> <th>136.076</th> <th>175.120</th> <th>200.136</th> <th>233.126</th> <th>242.147</th> <th>313.179</th> <th>327.204</th> <th>406.199</th> <th>451.722<sup>+2</sup></th> <th>501.257<sup>+2</sup></th> <th>557.794</th> <th>605.340</th> <th>614.817<sup>+2</sup></th> <th>664.352<sup>+2</sup></th> <th>684.343</th> <th>902.420</th> <th>1001.497</th> </tr> </thead> <tbody> <tr> <td>Frac. Inten.(% of TIC)</td> <td>0.01</td> <td>0.51</td> <td>9.03</td> <td>0.41</td> <td>19.11</td> <td>0.18</td> <td>2.88</td> <td>0.10</td> <td>4.09</td> <td>3.00</td> <td>4.48</td> <td>3.49</td> <td>4.08</td> <td>2.86</td> <td>3.71</td> <td>3.73</td> <td>3.87</td> <td>3.94</td> <td>3.48</td> <td>5.58</td> <td>7.34</td> <td>3.23</td> <td>3.13</td> <td>4.32</td> <td>3.44</td> </tr> <tr> <td>Rel. Inten.(% of BP)</td> <td>0.04</td> <td>2.67</td> <td>47.24</td> <td>2.13</td> <td>100.00</td> <td>0.95</td> <td>15.08</td> <td>0.52</td> <td>21.38</td> <td>15.68</td> <td>23.44</td> <td>18.27</td> <td>21.35</td> <td>14.97</td> <td>19.42</td> <td>19.50</td> <td>20.26</td> <td>20.62</td> <td>18.20</td> <td>29.22</td> <td>38.42</td> <td>16.90</td> <td>16.40</td> <td>22.62</td> <td>17.99</td> </tr> <tr> <td>Score</td> <td>0.20</td> <td>0.50</td> <td>-0.47</td> <td>0.50</td> <td>0.50</td> <td>1.00</td> <td>-0.15</td> <td>0.20</td> <td>-0.21</td> <td>1.50</td> <td>-0.23</td> <td>-0.18</td> <td>0.50</td> <td>0.50</td> <td>0.75</td> <td>-0.19</td> <td>1.50</td> <td>1.50</td> <td>1.50</td> <td>1.50</td> <td>1.50</td> <td>1.50</td> <td>0.50</td> <td>1.50</td> <td>1.50</td> </tr> <tr> <td>Ion-type</td> <td>PR</td> <td>V</td> <td></td> <td>KQ</td> <td>a<sub>1</sub></td> <td>H</td> <td></td> <td>RKQ</td> <td>y<sub>1</sub></td> <td></td> <td></td> <td></td> <td>b<sub>2</sub></td> <td>b<sub>3</sub></td> <td>NIV</td> <td></td> <td>y<sub>6</sub><sup>+2</sup></td> <td>y<sub>7</sub><sup>+2</sup></td> <td>y<sub>8</sub><sup>+2</sup></td> <td>y<sub>4</sub></td> <td>y<sub>9</sub><sup>+2</sup></td> <td>y<sub>10</sub><sup>+2</sup></td> <td>b<sub>6</sub></td> <td>y<sub>6</sub></td> <td>y<sub>7</sub></td> </tr> <tr> <td>Delta ppm</td> <td>-0.4</td> <td>-2.4</td> <td></td> <td>-6.8</td> <td>-22.3</td> <td>-13.4</td> <td></td> <td>-11.1</td> <td></td> <td>4.8</td> <td></td> <td></td> <td>-14.9</td> <td>-29.1</td> <td>-0.5</td> <td></td> <td>11.3</td> <td>12.8</td> <td>2.8</td> <td>5.5</td> <td>3.9</td> <td>5.0</td> <td>15.2</td> <td>-6.7</td> <td>2.6</td> </tr> </tbody> </table> |        |         |        |                  |                |                                         |                                 |                            |                             |                    |         |             |                   |                                                                                   | Fragment-ion (m/z) | 70.065  | 72.081                       | 84.044                       | 84.080                       | 86.096         | 110.070                      | 120.078                       | 129.101        | 136.076        | 175.120        | 200.136 | 233.126 | 242.147 | 313.179 | 327.204 | 406.199 | 451.722 <sup>+2</sup> | 501.257 <sup>+2</sup> | 557.794 | 605.340 | 614.817 <sup>+2</sup> | 664.352 <sup>+2</sup> | 684.343 | 902.420 | 1001.497 | Frac. Inten.(% of TIC) | 0.01 | 0.51 | 9.03 | 0.41 | 19.11 | 0.18 | 2.88 | 0.10 | 4.09 | 3.00 | 4.48 | 3.49 | 4.08 | 2.86 | 3.71 | 3.73 | 3.87 | 3.94 | 3.48 | 5.58 | 7.34 | 3.23 | 3.13 | 4.32 | 3.44 | Rel. Inten.(% of BP) | 0.04 | 2.67 | 47.24 | 2.13 | 100.00 | 0.95 | 15.08 | 0.52 | 21.38 | 15.68 | 23.44 | 18.27 | 21.35 | 14.97 | 19.42 | 19.50 | 20.26 | 20.62 | 18.20 | 29.22 | 38.42 | 16.90 | 16.40 | 22.62 | 17.99 | Score | 0.20 | 0.50 | -0.47 | 0.50 | 0.50 | 1.00 | -0.15 | 0.20 | -0.21 | 1.50 | -0.23 | -0.18 | 0.50 | 0.50 | 0.75 | -0.19 | 1.50 | 1.50 | 1.50 | 1.50 | 1.50 | 1.50 | 0.50 | 1.50 | 1.50 | Ion-type | PR | V |  | KQ | a <sub>1</sub> | H |  | RKQ | y <sub>1</sub> |  |  |  | b <sub>2</sub> | b <sub>3</sub> | NIV |  | y <sub>6</sub> <sup>+2</sup> | y <sub>7</sub> <sup>+2</sup> | y <sub>8</sub> <sup>+2</sup> | y <sub>4</sub> | y <sub>9</sub> <sup>+2</sup> | y <sub>10</sub> <sup>+2</sup> | b <sub>6</sub> | y <sub>6</sub> | y <sub>7</sub> | Delta ppm | -0.4 | -2.4 |  | -6.8 | -22.3 | -13.4 |  | -11.1 |  | 4.8 |  |  | -14.9 | -29.1 | -0.5 |  | 11.3 | 12.8 | 2.8 | 5.5 | 3.9 | 5.0 | 15.2 | -6.7 | 2.6 |
| Fragment-ion (m/z)                                                                                                                                                                                                                                                                                                                                                                                                                                                                                                                                                                                                                                                                                                                                                                                                                                                                                                                                                                                                                                                                                                                                                                                                                                                                                                                                                                                                                                                                                                                                                                                                                                                                                                                                                                                                                                                                                                                                                                                                                                                                                                                                                                                                                                                                                                                                                                                                                                                                                                                                                                                                                                                                                                                                 | 70.065 | 72.081  | 84.044 | 84.080           | 86.096         | 110.070                                 | 120.078                         | 129.101                    | 136.076                     | 175.120            | 200.136 | 233.126     | 242.147           | 313.179                                                                           | 327.204            | 406.199 | 451.722 <sup>+2</sup>        | 501.257 <sup>+2</sup>        | 557.794                      | 605.340        | 614.817 <sup>+2</sup>        | 664.352 <sup>+2</sup>         | 684.343        | 902.420        | 1001.497       |         |         |         |         |         |         |                       |                       |         |         |                       |                       |         |         |          |                        |      |      |      |      |       |      |      |      |      |      |      |      |      |      |      |      |      |      |      |      |      |      |      |      |      |                      |      |      |       |      |        |      |       |      |       |       |       |       |       |       |       |       |       |       |       |       |       |       |       |       |       |       |      |      |       |      |      |      |       |      |       |      |       |       |      |      |      |       |      |      |      |      |      |      |      |      |      |          |    |   |  |    |                |   |  |     |                |  |  |  |                |                |     |  |                              |                              |                              |                |                              |                               |                |                |                |           |      |      |  |      |       |       |  |       |  |     |  |  |       |       |      |  |      |      |     |     |     |     |      |      |     |
| Frac. Inten.(% of TIC)                                                                                                                                                                                                                                                                                                                                                                                                                                                                                                                                                                                                                                                                                                                                                                                                                                                                                                                                                                                                                                                                                                                                                                                                                                                                                                                                                                                                                                                                                                                                                                                                                                                                                                                                                                                                                                                                                                                                                                                                                                                                                                                                                                                                                                                                                                                                                                                                                                                                                                                                                                                                                                                                                                                             | 0.01   | 0.51    | 9.03   | 0.41             | 19.11          | 0.18                                    | 2.88                            | 0.10                       | 4.09                        | 3.00               | 4.48    | 3.49        | 4.08              | 2.86                                                                              | 3.71               | 3.73    | 3.87                         | 3.94                         | 3.48                         | 5.58           | 7.34                         | 3.23                          | 3.13           | 4.32           | 3.44           |         |         |         |         |         |         |                       |                       |         |         |                       |                       |         |         |          |                        |      |      |      |      |       |      |      |      |      |      |      |      |      |      |      |      |      |      |      |      |      |      |      |      |      |                      |      |      |       |      |        |      |       |      |       |       |       |       |       |       |       |       |       |       |       |       |       |       |       |       |       |       |      |      |       |      |      |      |       |      |       |      |       |       |      |      |      |       |      |      |      |      |      |      |      |      |      |          |    |   |  |    |                |   |  |     |                |  |  |  |                |                |     |  |                              |                              |                              |                |                              |                               |                |                |                |           |      |      |  |      |       |       |  |       |  |     |  |  |       |       |      |  |      |      |     |     |     |     |      |      |     |
| Rel. Inten.(% of BP)                                                                                                                                                                                                                                                                                                                                                                                                                                                                                                                                                                                                                                                                                                                                                                                                                                                                                                                                                                                                                                                                                                                                                                                                                                                                                                                                                                                                                                                                                                                                                                                                                                                                                                                                                                                                                                                                                                                                                                                                                                                                                                                                                                                                                                                                                                                                                                                                                                                                                                                                                                                                                                                                                                                               | 0.04   | 2.67    | 47.24  | 2.13             | 100.00         | 0.95                                    | 15.08                           | 0.52                       | 21.38                       | 15.68              | 23.44   | 18.27       | 21.35             | 14.97                                                                             | 19.42              | 19.50   | 20.26                        | 20.62                        | 18.20                        | 29.22          | 38.42                        | 16.90                         | 16.40          | 22.62          | 17.99          |         |         |         |         |         |         |                       |                       |         |         |                       |                       |         |         |          |                        |      |      |      |      |       |      |      |      |      |      |      |      |      |      |      |      |      |      |      |      |      |      |      |      |      |                      |      |      |       |      |        |      |       |      |       |       |       |       |       |       |       |       |       |       |       |       |       |       |       |       |       |       |      |      |       |      |      |      |       |      |       |      |       |       |      |      |      |       |      |      |      |      |      |      |      |      |      |          |    |   |  |    |                |   |  |     |                |  |  |  |                |                |     |  |                              |                              |                              |                |                              |                               |                |                |                |           |      |      |  |      |       |       |  |       |  |     |  |  |       |       |      |  |      |      |     |     |     |     |      |      |     |
| Score                                                                                                                                                                                                                                                                                                                                                                                                                                                                                                                                                                                                                                                                                                                                                                                                                                                                                                                                                                                                                                                                                                                                                                                                                                                                                                                                                                                                                                                                                                                                                                                                                                                                                                                                                                                                                                                                                                                                                                                                                                                                                                                                                                                                                                                                                                                                                                                                                                                                                                                                                                                                                                                                                                                                              | 0.20   | 0.50    | -0.47  | 0.50             | 0.50           | 1.00                                    | -0.15                           | 0.20                       | -0.21                       | 1.50               | -0.23   | -0.18       | 0.50              | 0.50                                                                              | 0.75               | -0.19   | 1.50                         | 1.50                         | 1.50                         | 1.50           | 1.50                         | 1.50                          | 0.50           | 1.50           | 1.50           |         |         |         |         |         |         |                       |                       |         |         |                       |                       |         |         |          |                        |      |      |      |      |       |      |      |      |      |      |      |      |      |      |      |      |      |      |      |      |      |      |      |      |      |                      |      |      |       |      |        |      |       |      |       |       |       |       |       |       |       |       |       |       |       |       |       |       |       |       |       |       |      |      |       |      |      |      |       |      |       |      |       |       |      |      |      |       |      |      |      |      |      |      |      |      |      |          |    |   |  |    |                |   |  |     |                |  |  |  |                |                |     |  |                              |                              |                              |                |                              |                               |                |                |                |           |      |      |  |      |       |       |  |       |  |     |  |  |       |       |      |  |      |      |     |     |     |     |      |      |     |
| Ion-type                                                                                                                                                                                                                                                                                                                                                                                                                                                                                                                                                                                                                                                                                                                                                                                                                                                                                                                                                                                                                                                                                                                                                                                                                                                                                                                                                                                                                                                                                                                                                                                                                                                                                                                                                                                                                                                                                                                                                                                                                                                                                                                                                                                                                                                                                                                                                                                                                                                                                                                                                                                                                                                                                                                                           | PR     | V       |        | KQ               | a <sub>1</sub> | H                                       |                                 | RKQ                        | y <sub>1</sub>              |                    |         |             | b <sub>2</sub>    | b <sub>3</sub>                                                                    | NIV                |         | y <sub>6</sub> <sup>+2</sup> | y <sub>7</sub> <sup>+2</sup> | y <sub>8</sub> <sup>+2</sup> | y <sub>4</sub> | y <sub>9</sub> <sup>+2</sup> | y <sub>10</sub> <sup>+2</sup> | b <sub>6</sub> | y <sub>6</sub> | y <sub>7</sub> |         |         |         |         |         |         |                       |                       |         |         |                       |                       |         |         |          |                        |      |      |      |      |       |      |      |      |      |      |      |      |      |      |      |      |      |      |      |      |      |      |      |      |      |                      |      |      |       |      |        |      |       |      |       |       |       |       |       |       |       |       |       |       |       |       |       |       |       |       |       |       |      |      |       |      |      |      |       |      |       |      |       |       |      |      |      |       |      |      |      |      |      |      |      |      |      |          |    |   |  |    |                |   |  |     |                |  |  |  |                |                |     |  |                              |                              |                              |                |                              |                               |                |                |                |           |      |      |  |      |       |       |  |       |  |     |  |  |       |       |      |  |      |      |     |     |     |     |      |      |     |
| Delta ppm                                                                                                                                                                                                                                                                                                                                                                                                                                                                                                                                                                                                                                                                                                                                                                                                                                                                                                                                                                                                                                                                                                                                                                                                                                                                                                                                                                                                                                                                                                                                                                                                                                                                                                                                                                                                                                                                                                                                                                                                                                                                                                                                                                                                                                                                                                                                                                                                                                                                                                                                                                                                                                                                                                                                          | -0.4   | -2.4    |        | -6.8             | -22.3          | -13.4                                   |                                 | -11.1                      |                             | 4.8                |         |             | -14.9             | -29.1                                                                             | -0.5               |         | 11.3                         | 12.8                         | 2.8                          | 5.5            | 3.9                          | 5.0                           | 15.2           | -6.7           | 2.6            |         |         |         |         |         |         |                       |                       |         |         |                       |                       |         |         |          |                        |      |      |      |      |       |      |      |      |      |      |      |      |      |      |      |      |      |      |      |      |      |      |      |      |      |                      |      |      |       |      |        |      |       |      |       |       |       |       |       |       |       |       |       |       |       |       |       |       |       |       |       |       |      |      |       |      |      |      |       |      |       |      |       |       |      |      |      |       |      |      |      |      |      |      |      |      |      |          |    |   |  |    |                |   |  |     |                |  |  |  |                |                |     |  |                              |                              |                              |                |                              |                               |                |                |                |           |      |      |  |      |       |       |  |       |  |     |  |  |       |       |      |  |      |      |     |     |     |     |      |      |     |

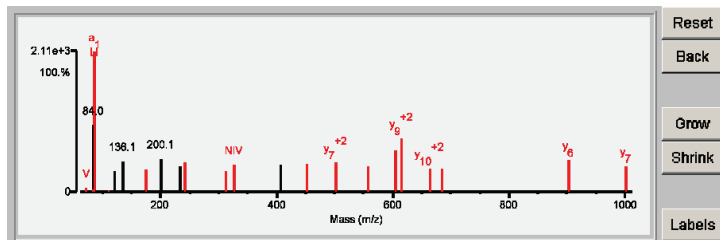

Reset

Back

Grow

Shrink

Labels

Result Summary

| Rank | Score | SPI (%) | BCS | # Unmatched Ions | Variable sites | Sequence                                 | MH <sup>+</sup> Calculated (Da) | MH <sup>+</sup> Error (Da) | MH <sup>+</sup> Error (ppm) | Protein MW/pl (Da) | Species | Accession # | Protein Name                                                               |
|------|-------|---------|-----|------------------|----------------|------------------------------------------|---------------------------------|----------------------------|-----------------------------|--------------------|---------|-------------|----------------------------------------------------------------------------|
| 1    | 12.70 | 60.5    | 6   | 10/25            | K119k          | (R)A I V A Y L F P S G L F E / k / R (A) | 1611.8893                       | 114.0598                   | 9.8                         | 45835.1/9.54       | HUMAN   | P82933      | 28S ribosomal protein S9, mitochondrial OS=Homo sapiens GN=MRPS9 PE=1 SV=2 |

Detailed Results

| Rank | Score | SPI (%) | BCS | # Unmatched Ions | Variable sites | Sequence                                 | MH <sup>+</sup> Calculated (Da) | MH <sup>+</sup> Error (Da) | MH <sup>+</sup> Error (ppm) | Protein MW/pl (Da) | Species | Accession # | MS-Digest Index # | Protein Name                                                               |
|------|-------|---------|-----|------------------|----------------|------------------------------------------|---------------------------------|----------------------------|-----------------------------|--------------------|---------|-------------|-------------------|----------------------------------------------------------------------------|
| 1    | 12.70 | 60.5    | 6   | 10/25            | K119k          | (R)A I V A Y L F P S G L F E / k / R (A) | 1611.8893                       | 114.0598                   | 9.8                         | 45835.1/9.54       | HUMAN   | P82933      | 696951            | 28S ribosomal protein S9, mitochondrial OS=Homo sapiens GN=MRPS9 PE=1 SV=2 |

  

| Fragment-ion (m/z)      | 62.009 | 70.065 | 84.082 | 86.095 | 87.100 | 120.077 | 136.077 | 157.131 | 175.120 | 185.130 | 235.110 | 348.204 | 357.225 | 396.227 | 417.243 | 466.206 | 489.601 | 524.283 <sup>+2</sup> | 541.952 | 597.818 <sup>+2</sup> | 692.402 | 707.357 | 950.515 | 1047.543 | 1194.603 |
|-------------------------|--------|--------|--------|--------|--------|---------|---------|---------|---------|---------|---------|---------|---------|---------|---------|---------|---------|-----------------------|---------|-----------------------|---------|---------|---------|----------|----------|
| Frac. Inten. (% of TIC) | 2.78   | 0.01   | 3.44   | 0.59   | 4.65   | 0.16    | 0.29    | 13.28   | 2.41    | 4.19    | 5.43    | 2.71    | 3.83    | 2.70    | 2.86    | 3.00    | 3.27    | 3.17                  | 2.43    | 6.11                  | 8.02    | 5.37    | 4.48    | 12.21    | 2.60     |
| Rel. Inten. (% of BP)   | 20.92  | 0.05   | 25.94  | 4.46   | 35.02  | 1.19    | 2.18    | 100.00  | 18.18   | 31.58   | 40.88   | 20.41   | 28.81   | 20.36   | 21.51   | 22.61   | 24.64   | 23.88                 | 18.33   | 46.01                 | 60.36   | 40.46   | 33.75   | 91.91    | 19.59    |
| Score                   | -0.21  | 0.20   | -0.26  | 0.22   | -0.35  | 1.00    | 1.00    | 0.50    | 1.50    | 0.75    | 0.75    | 0.75    | -0.29   | -0.20   | 1.50    | -0.23   | -0.25   | 1.50                  | -0.18   | 1.50                  | -0.60   | -0.40   | 1.50    | 1.50     | 1.50     |
| Ion-type                |        | PR     |        | LI     |        | F       | Y       | a2      | y1      | b2      | AY      | AYL     |         |         | y2      |         |         | y8 <sup>+2</sup>      |         | y9 <sup>+2</sup>      |         |         | y7      | y8       | y9       |
| Delta ppm               |        | -6.1   |        | -20.0  |        | -28.1   | 8.2     | -20.6   | 4.8     | 3.0     | 4.6     | 30.8    |         |         | -32.5   |         |         | 0.5                   |         | 2.3                   |         |         | 10.0    | -14.1    | -20.2    |

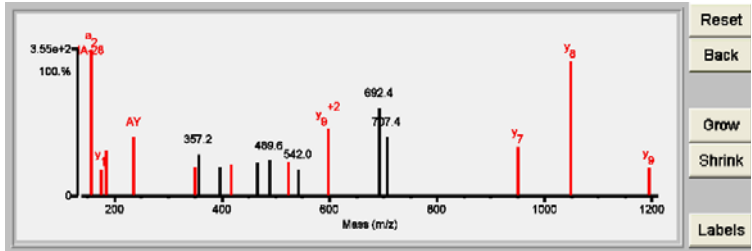

Result Summary

| Rank | Score | SPI (%) | BCS | # Unmatched Ions | Variable sites | Sequence                            | MH <sup>+</sup> Calculated (Da) | MH <sup>+</sup> Error (Da) | MH <sup>+</sup> Error (ppm) | Protein MW/pl (Da) | Species | Accession #            | Protein Name                                                                 |
|------|-------|---------|-----|------------------|----------------|-------------------------------------|---------------------------------|----------------------------|-----------------------------|--------------------|---------|------------------------|------------------------------------------------------------------------------|
| 1    | 10.75 | 73.2    | 8   | 10/25            | K135k          | (K)LEGLPEKVL <del>SLVDDPR</del> (N) | 1893.0692                       | 114.0529                   | 5.0                         | 48117.7/8.83       | HUMAN   | <a href="#">Q9BZE1</a> | 39S ribosomal protein L37, mitochondrial OS=Homo sapiens GN=MRPL37 PE=1 SV=2 |
| 2    | 5.92  | 55.5    | 1   | 13/25            | M87m           | (K)ALLEGHmLL <del>TQKDRPR</del> (R) | 1991.1219                       | 16.0002                    | 2.6                         | 55134.5/8.83       | HUMAN   | <a href="#">Q5VWM6</a> | PRAME family member 13 OS=Homo sapiens GN=PRAMEF13 PE=3 SV=1                 |
| 2    | 5.92  | 55.5    | 1   | 13/25            | M87m           | (K)ALLEGHmLL <del>TQKDRPR</del> (R) | 1991.1219                       | 16.0002                    | 2.6                         | 49433.8/8.70       | HUMAN   | <a href="#">Q5SWL7</a> | PRAME family member 14 OS=Homo sapiens GN=PRAMEF14 PE=2 SV=1                 |
| 2    | 5.92  | 55.5    | 1   | 13/25            | M87m           | (K)ALLEGHmLL <del>TQKDRPR</del> (R) | 1991.1219                       | 16.0002                    | 2.6                         | 55162.5/8.93       | HUMAN   | <a href="#">Q95521</a> | PRAME family member 1 OS=Homo sapiens GN=PRAMEF1 PE=2 SV=2                   |
| 2    | 5.92  | 55.5    | 1   | 13/25            | M87m           | (K)ALLEGHmLL <del>TQKDRPR</del> (R) | 1991.1219                       | 16.0002                    | 2.6                         | 54872.0/8.12       | HUMAN   | <a href="#">Q60811</a> | PRAME family member 2 OS=Homo sapiens GN=PRAMEF2 PE=2 SV=2                   |

Detailed Results

| Rank | Score | SPI (%) | BCS | # Unmatched Ions | Variable sites | Sequence                                            | MH <sup>+</sup> Calculated (Da) | MH <sup>+</sup> Error (Da) | MH <sup>+</sup> Error (ppm) | Protein MW/pl (Da) | Species | Accession #            | MS-Digest Index #      | Protein Name                                                                 |
|------|-------|---------|-----|------------------|----------------|-----------------------------------------------------|---------------------------------|----------------------------|-----------------------------|--------------------|---------|------------------------|------------------------|------------------------------------------------------------------------------|
| 1    | 10.75 | 73.2    | 8   | 10/25            | K135k          | (K) L I \ E V G L I P E K V L / S / L V / D P R (N) | 1893.0692                       | 114.0529                   | 5.0                         | 48117.7/8.83       | HUMAN   | <a href="#">Q9BZE1</a> | <a href="#">636953</a> | 39S ribosomal protein L37, mitochondrial OS=Homo sapiens GN=MRPL37 PE=1 SV=2 |

  

| Fragment-ion (m/z)      | 70.066 | 84.046 | 84.080 | 86.096 | 87.053 | 116.080 | 120.079 | 147.047 | 199.177 | 227.095 | 227.172 | 272.171 | 356.217 | 368.271 | 413.228 | 486.273 | 500.284 | 502.238 | 526.326 | 568.314 | 573.021 <sup>+3</sup> | 714.377 | 741.433 <sup>+2</sup> | 801.410 | 881.540 |
|-------------------------|--------|--------|--------|--------|--------|---------|---------|---------|---------|---------|---------|---------|---------|---------|---------|---------|---------|---------|---------|---------|-----------------------|---------|-----------------------|---------|---------|
| Frac. Inten. (% of TIC) | 0.00   | 0.06   | 3.67   | 15.11  | 0.06   | 2.52    | 1.92    | 2.07    | 9.04    | 3.45    | 6.78    | 17.44   | 2.49    | 2.45    | 3.13    | 2.47    | 2.93    | 2.38    | 2.54    | 3.28    | 3.00                  | 2.09    | 3.77                  | 5.34    | 2.00    |
| Rel. Inten. (% of BP)   | 0.03   | 0.33   | 21.02  | 86.64  | 0.34   | 14.46   | 11.03   | 11.87   | 51.81   | 19.77   | 38.84   | 100.00  | 14.26   | 14.02   | 17.94   | 14.18   | 16.81   | 13.62   | 14.57   | 18.81   | 17.21                 | 12.00   | 21.62                 | 30.63   | 11.46   |
| Score                   | 0.20   | 1.00   | -0.21  | 0.50   | 0.33   | -0.14   | -0.11   | -0.12   | 0.50    | 0.75    | 0.50    | 1.50    | 0.50    | -0.14   | 0.75    | -0.14   | -0.17   | 1.50    | 0.50    | 0.75    | -0.17                 | 1.50    | -0.22                 | 1.50    | -0.11   |
| Ion-type                | PR     | E      |        | a1     | NR     |         |         | a2      | PE      | b2      | y2      | b3      | b4      |         |         |         | y4      | b5      | PEKV    |         |                       | y6      |                       | y7      |         |
| Delta ppm               | 11.1   | 15.6   |        | -17.7  | 0.50   | -28.6   |         | -23.0   | -37.6   | -21.6   | -1.9    | -7.0    |         |         |         |         | 25.7    | 2.2     | 6.4     |         |                       | -1.0    |                       | 0.2     |         |

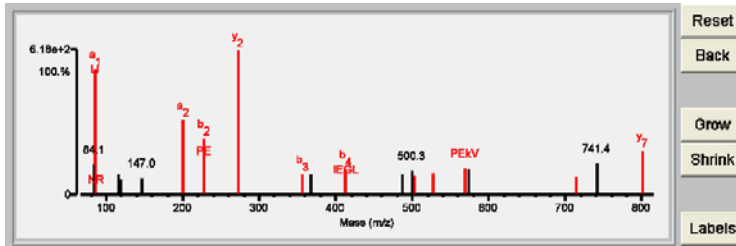

Reset

Back

Grow

Shrink

Labels

Result Summary

| Rank | Score | SPI (%) | BCS | # Unmatched Ions | Variable sites | Sequence                      | MH <sup>+</sup> Calculated (Da) | MH <sup>+</sup> Error (Da) | MH <sup>+</sup> Error (ppm) | Protein MW/PI (Da) | Species | Accession # | Protein Name                                                                           |
|------|-------|---------|-----|------------------|----------------|-------------------------------|---------------------------------|----------------------------|-----------------------------|--------------------|---------|-------------|----------------------------------------------------------------------------------------|
| 1    | 9.31  | 61.8    | 6   | 12/25            | K138k K139k    | (R)SAVPPGADkAEAGAGSATEFQFR(G) | 2392.1892                       | 228.0826                   | -1.2                        | 18897.9/10.15      | HUMAN   | P46783      | 40S ribosomal protein S10 OS=Homo sapiens GN=RPS10 PE=1 SV=1                           |
| 2    | 5.57  | 55.1    | 3   | 12/25            | None           | (K)IQIKDDNQEIASMERQLTDTKKE(I) | 2620.2883                       | -0.0165                    | -6.3                        | 69239.7/5.73       | HUMAN   | Q96LB3      | Intraflagellar transport protein 74 homolog OS=Homo sapiens GN=IFT74 PE=2 SV=1         |
| 3    | 5.28  | 56.0    | 2   | 12/25            | K78k           | (K)YSASGTPGTPOSSQRVCSPTTLK(A) | 2506.2024                       | 114.0693                   | 10.1                        | 37899.5/5.98       | HUMAN   | A6NCF5      | Putative MAGE domain-containing protein MAGEA13P OS=Homo sapiens GN=MAGEA13P PE=5 SV=1 |
| 4    | 5.09  | 52.0    | 3   | 13/25            | None           | (K)EKETDLQREMSAEQNDDKIQIK(L)  | 2620.2883                       | -0.0165                    | -6.3                        | 69239.7/5.74       | HUMAN   | RQ96LB3     | REVERSE Intraflagellar transport protein 74 homolog OS=Homo sapiens GN=IFT74 PE=2 SV=1 |
| 5    | 3.90  | 51.8    | 3   | 12/25            | None           | (K)TVAPPTHISESAMFESFQLLAEK(K) | 2620.2963                       | -0.0246                    | -8.4                        | 191100.8/5.74      | HUMAN   | RQ9P129     | REVERSE Uncharacterized protein KIAA1529 OS=Homo sapiens GN=KIAA1529 PE=1 SV=2         |

Detailed Results

| Rank | Score | SPI (%) | BCS | # Unmatched Ions | Variable sites | Sequence                                                 | MH <sup>+</sup> Calculated (Da) | MH <sup>+</sup> Error (Da) | MH <sup>+</sup> Error (ppm) | Protein MW/PI (Da) | Species | Accession # | MS-Digest Index # | Protein Name                                                 |
|------|-------|---------|-----|------------------|----------------|----------------------------------------------------------|---------------------------------|----------------------------|-----------------------------|--------------------|---------|-------------|-------------------|--------------------------------------------------------------|
| 1    | 9.31  | 61.8    | 6   | 12/25            | K138k K139k    | (R)S AVI P P G A D k k A E A G A G S A T E F / Q F R (G) | 2392.1892                       | 228.0826                   | -1.2                        | 18897.9/10.15      | HUMAN   | P46783      | 663631            | 40S ribosomal protein S10 OS=Homo sapiens GN=RPS10 PE=1 SV=1 |

| Fragment-ion (m/z)      | 70.066 | 72.082 | 86.095 | 102.053 | 131.081 | 159.076 | 203.108 | 258.143 | 450.242 | 587.044 <sup>+2</sup> | 587.278 <sup>+2</sup> | 597.314 | 661.329 | 661.824 | 726.350 | 733.352 <sup>+2</sup> | 750.046 <sup>+3</sup> | 760.366 | 768.886 | 782.374 <sup>+3</sup> | 788.372 <sup>+3</sup> | 810.396 <sup>+2</sup> | 827.394 | 874.899 <sup>+2</sup> | 883.900 <sup>+2</sup> |
|-------------------------|--------|--------|--------|---------|---------|---------|---------|---------|---------|-----------------------|-----------------------|---------|---------|---------|---------|-----------------------|-----------------------|---------|---------|-----------------------|-----------------------|-----------------------|---------|-----------------------|-----------------------|
| Frac. Inten. (% of TIC) | 0.00   | 0.30   | 2.07   | 0.12    | 2.35    | 5.55    | 2.06    | 3.27    | 4.06    | 4.52                  | 4.89                  | 9.72    | 3.77    | 2.11    | 4.63    | 3.66                  | 3.54                  | 2.50    | 2.54    | 8.45                  | 14.46                 | 3.00                  | 5.35    | 3.26                  | 3.81                  |
| Rel. Inten. (% of BP)   | 0.02   | 2.09   | 14.33  | 0.81    | 16.23   | 38.34   | 14.25   | 22.58   | 28.10   | 31.23                 | 33.84                 | 67.21   | 26.04   | 14.60   | 31.99   | 25.30                 | 24.49                 | 17.30   | 17.57   | 58.43                 | 100.00                | 20.76                 | 36.99   | 22.53                 | 26.35                 |
| Score                   | 0.20   | 0.50   | -0.14  | 1.00    | 0.50    | 0.75    | -0.14   | 0.50    | 1.50    | -0.31                 | -0.34                 | 1.50    | -0.26   | -0.15   | 1.50    | -0.25                 | 0.50                  | -0.17   | -0.18   | 0.50                  | 1.50                  | -0.21                 | 1.50    | -0.23                 | -0.26                 |
| Ion-type                | PR     | V      |        | E       | a2      | b2      |         | b3      | y3      |                       |                       | y4      |         |         | y5      |                       | y20+H2O <sup>+3</sup> |         |         | y21+H2O <sup>+3</sup> |                       | y21 <sup>+3</sup>     | ye      |                       |                       |
| Delta ppm               | 12.5   | 12.8   |        | -16.2   |         | SA.28   | SA      | -1.6    | -2.6    |                       |                       |         |         |         |         |                       | 21.8                  |         |         | -8.5                  | -15.4                 |                       | -12.2   |                       |                       |

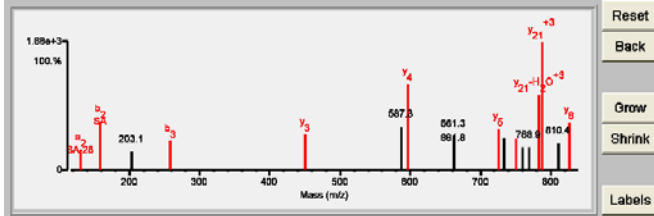

Result Summary

| Rank | Score | SPI (%) | BCS | # Unmatched Ions | Variable sites | Sequence            | MH <sup>+</sup> Calculated (Da) | MH <sup>+</sup> Error (Da) | MH <sup>+</sup> Error (ppm) | Protein MW/pl (Da) | Species | Accession # | Protein Name                                                 |
|------|-------|---------|-----|------------------|----------------|---------------------|---------------------------------|----------------------------|-----------------------------|--------------------|---------|-------------|--------------------------------------------------------------|
| 1    | 10.75 | 69.7    | 5   | 8/25             | K43k           | (K)KGLTPSQIGVILR(D) | 1381.8526                       | 114.0431                   | 0.1                         | 17222.4/10.53      | HUMAN   | P62277      | 40S ribosomal protein S13 OS=Homo sapiens GN=RPS13 PE=1 SV=2 |

Detailed Results

| Rank                   | Score  | SPI (%) | BCS    | # Unmatched Ions | Variable sites | Sequence            | MH <sup>+</sup> Calculated (Da) | MH <sup>+</sup> Error (Da) | MH <sup>+</sup> Error (ppm)     | Protein MW/pl (Da) | Species | Accession # | MS-Digest Index #               | Protein Name                                                 |                |         |                       |                       |                       |                |                |                       |                |                                 |                |
|------------------------|--------|---------|--------|------------------|----------------|---------------------|---------------------------------|----------------------------|---------------------------------|--------------------|---------|-------------|---------------------------------|--------------------------------------------------------------|----------------|---------|-----------------------|-----------------------|-----------------------|----------------|----------------|-----------------------|----------------|---------------------------------|----------------|
| 1                      | 10.75  | 69.7    | 5      | 8/25             | K43k           | (K)KGLTPSQIGVILR(D) | 1381.8526                       | 114.0431                   | 0.1                             | 17222.4/10.53      | HUMAN   | P62277      | 668175                          | 40S ribosomal protein S13 OS=Homo sapiens GN=RPS13 PE=1 SV=2 |                |         |                       |                       |                       |                |                |                       |                |                                 |                |
| Fragment-ion (m/z)     | 70.065 | 72.076  | 84.079 | 86.096           | 101.067        | 129.104             | 132.076                         | 157.095                    | 158.093                         | 270.175            | 312.203 | 349.198     | 384.250                         | 401.295                                                      | 413.255        | 469.305 | 514.295 <sup>+2</sup> | 519.303 <sup>+2</sup> | 521.761 <sup>+2</sup> | 557.371        | 583.337        | 605.785 <sup>+2</sup> | 670.468        | 781.485                         | 798.516        |
| Frac. Inten.(% of TIC) | 0.01   | 7.17    | 0.42   | 0.75             | 0.16           | 3.77                | 3.35                            | 2.75                       | 4.16                            | 4.16               | 5.08    | 2.72        | 3.21                            | 2.98                                                         | 3.38           | 3.84    | 5.04                  | 2.52                  | 2.79                  | 21.37          | 3.89           | 2.86                  | 7.13           | 2.53                            | 3.94           |
| Rel. Inten.(% of BP)   | 0.05   | 33.56   | 1.97   | 3.53             | 0.74           | 17.66               | 15.69                           | 12.85                      | 19.47                           | 19.47              | 23.76   | 12.73       | 15.03                           | 13.96                                                        | 15.83          | 17.95   | 23.58                 | 11.79                 | 13.06                 | 100.00         | 18.18          | 13.37                 | 33.36          | 11.84                           | 18.46          |
| Score                  | 0.20   | -0.34   | 0.50   | 0.22             |                | 0.50                | -0.16                           | 0.75                       | 0.50                            | 0.75               | 0.75    | -0.13       | 0.50                            | 1.50                                                         | 0.50           | -0.18   | -0.24                 | -0.12                 | -0.13                 | 1.50           | 0.50           | -0.13                 | 1.50           | 0.50                            | 1.50           |
| Ion-type               | PR     |         | KQ     | LI               | KQ             | RKQ                 |                                 | GV                         | y <sub>1</sub> -NH <sub>3</sub> | GV                 | LTP     |             | y <sub>3</sub> -NH <sub>3</sub> | y <sub>3</sub>                                               | b <sub>3</sub> |         |                       |                       |                       | y <sub>5</sub> | a <sub>5</sub> |                       | y <sub>6</sub> | y <sub>7</sub> -NH <sub>3</sub> | y <sub>7</sub> |
| Delta ppm              | -1.8   |         | -19.9  | -10.8            |                | 15.2                |                                 | -20.1                      | 3.1                             | -28.2              | 31.8    |             | -27.9                           | 19.2                                                         | 6.8            |         |                       |                       |                       | -9.8           | -35.7          |                       | 10.6           | -10.0                           | -3.9           |

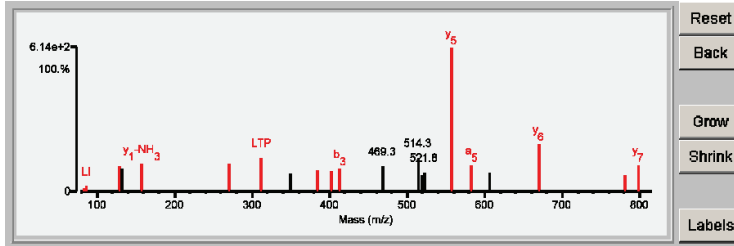

Result Summary

| Rank | Score | SPI (%) | BCS | # Unmatched Ions | Variable sites | Sequence              | MH <sup>+</sup> Calculated (Da) | MH <sup>+</sup> Error (Da) | MH <sup>+</sup> Error (ppm) | Protein MW/pl (Da) | Species | Accession # | Protein Name                                                 |
|------|-------|---------|-----|------------------|----------------|-----------------------|---------------------------------|----------------------------|-----------------------------|--------------------|---------|-------------|--------------------------------------------------------------|
| 1    | 14.88 | 74.3    | 9   | 6/25             | K50k           | (R)TLQYKLLPEVLLLGK(E) | 1728.0670                       | 114.0515                   | 4.6                         | 16445.4/10.21      | HUMAN   | P62249      | 40S ribosomal protein S16 OS=Homo sapiens GN=RPS16 PE=1 SV=2 |

Detailed Results

| Rank                   | Score | SPI (%) | BCS    | # Unmatched Ions | Variable sites | Sequence                             | MH <sup>+</sup> Calculated (Da) | MH <sup>+</sup> Error (Da) | MH <sup>+</sup> Error (ppm) | Protein MW/pl (Da)               | Species        | Accession #    | MS-Digest Index # | Protein Name                                                 |                |                |                              |                       |                |         |                |                |                       |                       |                |         |
|------------------------|-------|---------|--------|------------------|----------------|--------------------------------------|---------------------------------|----------------------------|-----------------------------|----------------------------------|----------------|----------------|-------------------|--------------------------------------------------------------|----------------|----------------|------------------------------|-----------------------|----------------|---------|----------------|----------------|-----------------------|-----------------------|----------------|---------|
| 1                      | 14.88 | 74.3    | 9      | 6/25             | K50k           | (R)T L\Q\Y k L\L/E/P V/L/L/L/G K (E) | 1728.0670                       | 114.0515                   | 4.6                         | 16445.4/10.21                    | HUMAN          | P62249         | 672877            | 40S ribosomal protein S16 OS=Homo sapiens GN=RPS16 PE=1 SV=2 |                |                |                              |                       |                |         |                |                |                       |                       |                |         |
| Fragment-ion (m/z)     |       | 70.063  | 72.078 | 84.077           | 86.096         | 101.073                              | 169.128                         | 187.143                    | 188.142                     | 197.127                          | 204.141        | 215.136        | 227.183           | 310.206                                                      | 317.222        | 343.199        | 370.254 <sup>+2</sup>        | 372.717 <sup>+2</sup> | 430.304        | 439.231 | 543.387        | 739.510        | 750.382 <sup>+2</sup> | 806.464 <sup>+2</sup> | 861.462        | 868.558 |
| Frac. Inten.(% of TIC) |       | 0.00    | 0.07   | 12.59            | 0.47           | 0.08                                 | 4.78                            | 14.33                      | 2.13                        | 2.71                             | 3.05           | 2.18           | 2.40              | 4.13                                                         | 4.39           | 3.38           | 7.63                         | 2.30                  | 3.59           | 2.26    | 2.64           | 10.19          | 2.93                  | 3.48                  | 3.17           | 5.08    |
| Rel. Inten.(% of BP)   |       | 0.03    | 0.49   | 87.82            | 3.29           | 0.59                                 | 33.33                           | 100.00                     | 14.88                       | 18.91                            | 21.28          | 15.22          | 16.74             | 28.82                                                        | 30.65          | 23.59          | 53.26                        | 16.05                 | 25.07          | 15.80   | 18.45          | 71.07          | 20.45                 | 24.25                 | 22.13          | 35.44   |
| Score                  |       | 0.20    | 0.50   | -0.88            | 0.22           | 0.50                                 | 0.50                            | 0.50                       | -0.15                       | 0.75                             | 1.50           | 0.50           | 0.75              | 0.75                                                         | 1.50           | 0.50           | 1.50                         | -0.16                 | 1.50           | -0.16   | 1.50           | 1.50           | -0.20                 | -0.24                 | 0.50           | 1.50    |
| Ion-type               |       | PR      | V      |                  | LI             | QK                                   | PV-28                           | #2                         |                             | b <sub>2</sub> -H <sub>2</sub> O | y <sub>2</sub> | b <sub>2</sub> | LL                | PVL                                                          | y <sub>3</sub> | b <sub>3</sub> | y <sub>7</sub> <sup>+2</sup> |                       | y <sub>4</sub> |         | y <sub>5</sub> | y <sub>7</sub> |                       | b <sub>6</sub>        | y <sub>8</sub> |         |
| Delta ppm              |       | -26.1   | -37.1  |                  | -8.4           | 16.4                                 | -41.6                           | -9.6                       |                             | -13.5                            | 34.9           | -17.3          | 26.8              | -23.6                                                        | 10.9           | 2.1            | -8.3                         |                       | 3.3            |         | 1.0            | 3.5            |                       |                       | -24.9          | 9.1     |

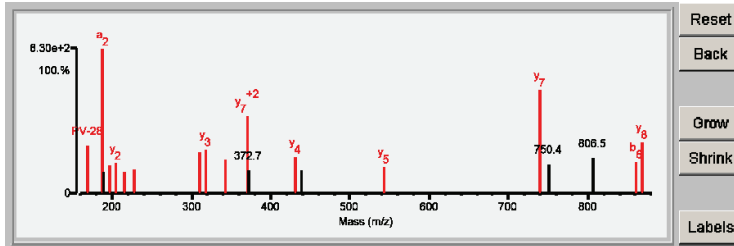



Result Summary

| Rank | Score | SPI (%) | BCS | # Unmatched Ions | Variable sites | Sequence             | MH <sup>+</sup> Calculated (Da) | MH <sup>+</sup> Error (Da) | MH <sup>+</sup> Error (ppm) | Protein MW/pl (Da) | Species | Accession # | Protein Name                                                 |
|------|-------|---------|-----|------------------|----------------|----------------------|---------------------------------|----------------------------|-----------------------------|--------------------|---------|-------------|--------------------------------------------------------------|
| 1    | 14.04 | 73.0    | 7   | 6/24             | K19k           | (R)VIIEKYYTR(L)      | 1184.6674                       | 114.0518                   | 6.8                         | 15550.2/9.85       | HUMAN   | P08708      | 40S ribosomal protein S17 OS=Homo sapiens GN=RPS17 PE=1 SV=2 |
| 2    | 4.42  | 51.2    | 1   | 11/24            | None           | (R)VGGTGGAVSELVPR(S) | 1298.7063                       | 0.0129                     | 9.9                         | 102048.7/5.28      | HUMAN   | Q9Y5H7      | Protocadherin alpha-5 OS=Homo sapiens GN=PCHA5 PE=1 SV=1     |
| 2    | 4.42  | 51.2    | 1   | 11/24            | None           | (R)VGGTGGAVSELVPR(S) | 1298.7063                       | 0.0129                     | 9.9                         | 102716.2/4.93      | HUMAN   | Q9UN73      | Protocadherin alpha-6 OS=Homo sapiens GN=PCHA6 PE=1 SV=1     |

Detailed Results

| Rank                                                                                                                                                                                                                                                                                                                                                                                                                                                                                                                                                                                                                                                                                                                                                                                                                                                                                                                                                                                                                                                                                                                                                                                                                                                                                                                                                                                                                                                                                                                                                                                                                                                                                                                                                                                                                                                                                                                                                                                                                                                                                                                                                                                                                                                                                                                                                                                             | Score  | SPI (%) | BCS    | # Unmatched Ions | Variable sites | Sequence                            | MH <sup>+</sup> Calculated (Da) | MH <sup>+</sup> Error (Da) | MH <sup>+</sup> Error (ppm) | Protein MW/pl (Da) | Species | Accession # | MS-Digest Index # | Protein Name                                                 |                    |         |         |         |         |                       |         |         |         |         |         |         |         |         |         |         |         |         |         |         |                       |         |         |         |         |                         |      |      |       |      |      |      |      |      |      |      |      |      |       |      |      |      |      |      |      |      |      |      |      |      |                       |      |      |        |      |      |       |       |      |      |      |       |       |       |       |       |       |       |       |       |       |       |       |       |       |       |      |      |       |      |      |       |       |      |      |      |       |      |      |       |      |      |      |      |      |      |      |       |      |      |          |  |    |    |    |    |   |     |   |   |   |   |    |    |  |    |       |    |    |    |                  |    |    |    |           |  |     |       |      |       |  |  |      |      |      |  |      |      |  |      |       |      |      |     |     |      |     |     |
|--------------------------------------------------------------------------------------------------------------------------------------------------------------------------------------------------------------------------------------------------------------------------------------------------------------------------------------------------------------------------------------------------------------------------------------------------------------------------------------------------------------------------------------------------------------------------------------------------------------------------------------------------------------------------------------------------------------------------------------------------------------------------------------------------------------------------------------------------------------------------------------------------------------------------------------------------------------------------------------------------------------------------------------------------------------------------------------------------------------------------------------------------------------------------------------------------------------------------------------------------------------------------------------------------------------------------------------------------------------------------------------------------------------------------------------------------------------------------------------------------------------------------------------------------------------------------------------------------------------------------------------------------------------------------------------------------------------------------------------------------------------------------------------------------------------------------------------------------------------------------------------------------------------------------------------------------------------------------------------------------------------------------------------------------------------------------------------------------------------------------------------------------------------------------------------------------------------------------------------------------------------------------------------------------------------------------------------------------------------------------------------------------|--------|---------|--------|------------------|----------------|-------------------------------------|---------------------------------|----------------------------|-----------------------------|--------------------|---------|-------------|-------------------|--------------------------------------------------------------|--------------------|---------|---------|---------|---------|-----------------------|---------|---------|---------|---------|---------|---------|---------|---------|---------|---------|---------|---------|---------|---------|-----------------------|---------|---------|---------|---------|-------------------------|------|------|-------|------|------|------|------|------|------|------|------|------|-------|------|------|------|------|------|------|------|------|------|------|------|-----------------------|------|------|--------|------|------|-------|-------|------|------|------|-------|-------|-------|-------|-------|-------|-------|-------|-------|-------|-------|-------|-------|-------|-------|------|------|-------|------|------|-------|-------|------|------|------|-------|------|------|-------|------|------|------|------|------|------|------|-------|------|------|----------|--|----|----|----|----|---|-----|---|---|---|---|----|----|--|----|-------|----|----|----|------------------|----|----|----|-----------|--|-----|-------|------|-------|--|--|------|------|------|--|------|------|--|------|-------|------|------|-----|-----|------|-----|-----|
| 1                                                                                                                                                                                                                                                                                                                                                                                                                                                                                                                                                                                                                                                                                                                                                                                                                                                                                                                                                                                                                                                                                                                                                                                                                                                                                                                                                                                                                                                                                                                                                                                                                                                                                                                                                                                                                                                                                                                                                                                                                                                                                                                                                                                                                                                                                                                                                                                                | 14.04  | 73.0    | 7      | 6/24             | K19k           | (R) V I I E / k / Y / Y / T / R (L) | 1184.6674                       | 114.0518                   | 6.8                         | 15550.2/9.85       | HUMAN   | P08708      | 337184            | 40S ribosomal protein S17 OS=Homo sapiens GN=RPS17 PE=1 SV=2 |                    |         |         |         |         |                       |         |         |         |         |         |         |         |         |         |         |         |         |         |         |                       |         |         |         |         |                         |      |      |       |      |      |      |      |      |      |      |      |      |       |      |      |      |      |      |      |      |      |      |      |      |                       |      |      |        |      |      |       |       |      |      |      |       |       |       |       |       |       |       |       |       |       |       |       |       |       |       |      |      |       |      |      |       |       |      |      |      |       |      |      |       |      |      |      |      |      |      |      |       |      |      |          |  |    |    |    |    |   |     |   |   |   |   |    |    |  |    |       |    |    |    |                  |    |    |    |           |  |     |       |      |       |  |  |      |      |      |  |      |      |  |      |       |      |      |     |     |      |     |     |
| <table border="1"> <thead> <tr> <th>Fragment-ion (m/z)</th> <th>70.065</th> <th>72.081</th> <th>84.080</th> <th>86.096</th> <th>87.053</th> <th>87.099</th> <th>110.070</th> <th>112.086</th> <th>129.102</th> <th>136.075</th> <th>141.102</th> <th>175.121</th> <th>185.166</th> <th>199.179</th> <th>213.160</th> <th>215.138</th> <th>243.142</th> <th>276.165</th> <th>439.233</th> <th>543.787<sup>+2</sup></th> <th>602.293</th> <th>787.407</th> <th>844.434</th> <th>973.475</th> </tr> </thead> <tbody> <tr> <td>Frac. Inten. (% of TIC)</td> <td>0.00</td> <td>0.65</td> <td>17.76</td> <td>1.25</td> <td>0.08</td> <td>3.45</td> <td>2.30</td> <td>0.06</td> <td>0.11</td> <td>0.18</td> <td>3.27</td> <td>7.27</td> <td>10.52</td> <td>2.63</td> <td>4.36</td> <td>3.10</td> <td>2.62</td> <td>6.12</td> <td>8.84</td> <td>3.79</td> <td>8.75</td> <td>3.30</td> <td>4.49</td> <td>5.10</td> </tr> <tr> <td>Rel. Inten. (% of BP)</td> <td>0.02</td> <td>3.68</td> <td>100.00</td> <td>7.04</td> <td>0.48</td> <td>19.43</td> <td>12.94</td> <td>0.34</td> <td>0.60</td> <td>0.99</td> <td>18.42</td> <td>40.93</td> <td>59.28</td> <td>14.81</td> <td>24.56</td> <td>17.46</td> <td>14.77</td> <td>34.47</td> <td>49.79</td> <td>21.32</td> <td>49.26</td> <td>18.56</td> <td>25.31</td> <td>28.73</td> </tr> <tr> <td>Score</td> <td>0.20</td> <td>0.50</td> <td>-0.81</td> <td>0.22</td> <td>0.33</td> <td>-0.16</td> <td>-0.11</td> <td>0.33</td> <td>0.20</td> <td>1.00</td> <td>-0.15</td> <td>1.50</td> <td>0.50</td> <td>-0.12</td> <td>0.50</td> <td>0.50</td> <td>0.75</td> <td>1.50</td> <td>1.50</td> <td>1.50</td> <td>1.50</td> <td>-0.15</td> <td>1.50</td> <td>1.50</td> </tr> <tr> <td>Ion-type</td> <td></td> <td>PR</td> <td>a1</td> <td>LI</td> <td>NR</td> <td>R</td> <td>RKQ</td> <td>Y</td> <td>Y</td> <td>Y</td> <td>Y</td> <td>a1</td> <td>a2</td> <td></td> <td>b2</td> <td>IE-28</td> <td>IE</td> <td>Y2</td> <td>Y3</td> <td>Y7<sup>+2</sup></td> <td>Y4</td> <td>Y5</td> <td>Y6</td> </tr> <tr> <td>Delta ppm</td> <td></td> <td>2.5</td> <td>-16.3</td> <td>-0.3</td> <td>-21.7</td> <td></td> <td></td> <td>-6.5</td> <td>-1.1</td> <td>-7.3</td> <td></td> <td>11.7</td> <td>-1.8</td> <td></td> <td>-4.0</td> <td>-11.7</td> <td>26.6</td> <td>-6.6</td> <td>7.6</td> <td>7.8</td> <td>-0.8</td> <td>2.9</td> <td>1.5</td> </tr> </tbody> </table> |        |         |        |                  |                |                                     |                                 |                            |                             |                    |         |             |                   |                                                              | Fragment-ion (m/z) | 70.065  | 72.081  | 84.080  | 86.096  | 87.053                | 87.099  | 110.070 | 112.086 | 129.102 | 136.075 | 141.102 | 175.121 | 185.166 | 199.179 | 213.160 | 215.138 | 243.142 | 276.165 | 439.233 | 543.787 <sup>+2</sup> | 602.293 | 787.407 | 844.434 | 973.475 | Frac. Inten. (% of TIC) | 0.00 | 0.65 | 17.76 | 1.25 | 0.08 | 3.45 | 2.30 | 0.06 | 0.11 | 0.18 | 3.27 | 7.27 | 10.52 | 2.63 | 4.36 | 3.10 | 2.62 | 6.12 | 8.84 | 3.79 | 8.75 | 3.30 | 4.49 | 5.10 | Rel. Inten. (% of BP) | 0.02 | 3.68 | 100.00 | 7.04 | 0.48 | 19.43 | 12.94 | 0.34 | 0.60 | 0.99 | 18.42 | 40.93 | 59.28 | 14.81 | 24.56 | 17.46 | 14.77 | 34.47 | 49.79 | 21.32 | 49.26 | 18.56 | 25.31 | 28.73 | Score | 0.20 | 0.50 | -0.81 | 0.22 | 0.33 | -0.16 | -0.11 | 0.33 | 0.20 | 1.00 | -0.15 | 1.50 | 0.50 | -0.12 | 0.50 | 0.50 | 0.75 | 1.50 | 1.50 | 1.50 | 1.50 | -0.15 | 1.50 | 1.50 | Ion-type |  | PR | a1 | LI | NR | R | RKQ | Y | Y | Y | Y | a1 | a2 |  | b2 | IE-28 | IE | Y2 | Y3 | Y7 <sup>+2</sup> | Y4 | Y5 | Y6 | Delta ppm |  | 2.5 | -16.3 | -0.3 | -21.7 |  |  | -6.5 | -1.1 | -7.3 |  | 11.7 | -1.8 |  | -4.0 | -11.7 | 26.6 | -6.6 | 7.6 | 7.8 | -0.8 | 2.9 | 1.5 |
| Fragment-ion (m/z)                                                                                                                                                                                                                                                                                                                                                                                                                                                                                                                                                                                                                                                                                                                                                                                                                                                                                                                                                                                                                                                                                                                                                                                                                                                                                                                                                                                                                                                                                                                                                                                                                                                                                                                                                                                                                                                                                                                                                                                                                                                                                                                                                                                                                                                                                                                                                                               | 70.065 | 72.081  | 84.080 | 86.096           | 87.053         | 87.099                              | 110.070                         | 112.086                    | 129.102                     | 136.075            | 141.102 | 175.121     | 185.166           | 199.179                                                      | 213.160            | 215.138 | 243.142 | 276.165 | 439.233 | 543.787 <sup>+2</sup> | 602.293 | 787.407 | 844.434 | 973.475 |         |         |         |         |         |         |         |         |         |         |                       |         |         |         |         |                         |      |      |       |      |      |      |      |      |      |      |      |      |       |      |      |      |      |      |      |      |      |      |      |      |                       |      |      |        |      |      |       |       |      |      |      |       |       |       |       |       |       |       |       |       |       |       |       |       |       |       |      |      |       |      |      |       |       |      |      |      |       |      |      |       |      |      |      |      |      |      |      |       |      |      |          |  |    |    |    |    |   |     |   |   |   |   |    |    |  |    |       |    |    |    |                  |    |    |    |           |  |     |       |      |       |  |  |      |      |      |  |      |      |  |      |       |      |      |     |     |      |     |     |
| Frac. Inten. (% of TIC)                                                                                                                                                                                                                                                                                                                                                                                                                                                                                                                                                                                                                                                                                                                                                                                                                                                                                                                                                                                                                                                                                                                                                                                                                                                                                                                                                                                                                                                                                                                                                                                                                                                                                                                                                                                                                                                                                                                                                                                                                                                                                                                                                                                                                                                                                                                                                                          | 0.00   | 0.65    | 17.76  | 1.25             | 0.08           | 3.45                                | 2.30                            | 0.06                       | 0.11                        | 0.18               | 3.27    | 7.27        | 10.52             | 2.63                                                         | 4.36               | 3.10    | 2.62    | 6.12    | 8.84    | 3.79                  | 8.75    | 3.30    | 4.49    | 5.10    |         |         |         |         |         |         |         |         |         |         |                       |         |         |         |         |                         |      |      |       |      |      |      |      |      |      |      |      |      |       |      |      |      |      |      |      |      |      |      |      |      |                       |      |      |        |      |      |       |       |      |      |      |       |       |       |       |       |       |       |       |       |       |       |       |       |       |       |      |      |       |      |      |       |       |      |      |      |       |      |      |       |      |      |      |      |      |      |      |       |      |      |          |  |    |    |    |    |   |     |   |   |   |   |    |    |  |    |       |    |    |    |                  |    |    |    |           |  |     |       |      |       |  |  |      |      |      |  |      |      |  |      |       |      |      |     |     |      |     |     |
| Rel. Inten. (% of BP)                                                                                                                                                                                                                                                                                                                                                                                                                                                                                                                                                                                                                                                                                                                                                                                                                                                                                                                                                                                                                                                                                                                                                                                                                                                                                                                                                                                                                                                                                                                                                                                                                                                                                                                                                                                                                                                                                                                                                                                                                                                                                                                                                                                                                                                                                                                                                                            | 0.02   | 3.68    | 100.00 | 7.04             | 0.48           | 19.43                               | 12.94                           | 0.34                       | 0.60                        | 0.99               | 18.42   | 40.93       | 59.28             | 14.81                                                        | 24.56              | 17.46   | 14.77   | 34.47   | 49.79   | 21.32                 | 49.26   | 18.56   | 25.31   | 28.73   |         |         |         |         |         |         |         |         |         |         |                       |         |         |         |         |                         |      |      |       |      |      |      |      |      |      |      |      |      |       |      |      |      |      |      |      |      |      |      |      |      |                       |      |      |        |      |      |       |       |      |      |      |       |       |       |       |       |       |       |       |       |       |       |       |       |       |       |      |      |       |      |      |       |       |      |      |      |       |      |      |       |      |      |      |      |      |      |      |       |      |      |          |  |    |    |    |    |   |     |   |   |   |   |    |    |  |    |       |    |    |    |                  |    |    |    |           |  |     |       |      |       |  |  |      |      |      |  |      |      |  |      |       |      |      |     |     |      |     |     |
| Score                                                                                                                                                                                                                                                                                                                                                                                                                                                                                                                                                                                                                                                                                                                                                                                                                                                                                                                                                                                                                                                                                                                                                                                                                                                                                                                                                                                                                                                                                                                                                                                                                                                                                                                                                                                                                                                                                                                                                                                                                                                                                                                                                                                                                                                                                                                                                                                            | 0.20   | 0.50    | -0.81  | 0.22             | 0.33           | -0.16                               | -0.11                           | 0.33                       | 0.20                        | 1.00               | -0.15   | 1.50        | 0.50              | -0.12                                                        | 0.50               | 0.50    | 0.75    | 1.50    | 1.50    | 1.50                  | 1.50    | -0.15   | 1.50    | 1.50    |         |         |         |         |         |         |         |         |         |         |                       |         |         |         |         |                         |      |      |       |      |      |      |      |      |      |      |      |      |       |      |      |      |      |      |      |      |      |      |      |      |                       |      |      |        |      |      |       |       |      |      |      |       |       |       |       |       |       |       |       |       |       |       |       |       |       |       |      |      |       |      |      |       |       |      |      |      |       |      |      |       |      |      |      |      |      |      |      |       |      |      |          |  |    |    |    |    |   |     |   |   |   |   |    |    |  |    |       |    |    |    |                  |    |    |    |           |  |     |       |      |       |  |  |      |      |      |  |      |      |  |      |       |      |      |     |     |      |     |     |
| Ion-type                                                                                                                                                                                                                                                                                                                                                                                                                                                                                                                                                                                                                                                                                                                                                                                                                                                                                                                                                                                                                                                                                                                                                                                                                                                                                                                                                                                                                                                                                                                                                                                                                                                                                                                                                                                                                                                                                                                                                                                                                                                                                                                                                                                                                                                                                                                                                                                         |        | PR      | a1     | LI               | NR             | R                                   | RKQ                             | Y                          | Y                           | Y                  | Y       | a1          | a2                |                                                              | b2                 | IE-28   | IE      | Y2      | Y3      | Y7 <sup>+2</sup>      | Y4      | Y5      | Y6      |         |         |         |         |         |         |         |         |         |         |         |                       |         |         |         |         |                         |      |      |       |      |      |      |      |      |      |      |      |      |       |      |      |      |      |      |      |      |      |      |      |      |                       |      |      |        |      |      |       |       |      |      |      |       |       |       |       |       |       |       |       |       |       |       |       |       |       |       |      |      |       |      |      |       |       |      |      |      |       |      |      |       |      |      |      |      |      |      |      |       |      |      |          |  |    |    |    |    |   |     |   |   |   |   |    |    |  |    |       |    |    |    |                  |    |    |    |           |  |     |       |      |       |  |  |      |      |      |  |      |      |  |      |       |      |      |     |     |      |     |     |
| Delta ppm                                                                                                                                                                                                                                                                                                                                                                                                                                                                                                                                                                                                                                                                                                                                                                                                                                                                                                                                                                                                                                                                                                                                                                                                                                                                                                                                                                                                                                                                                                                                                                                                                                                                                                                                                                                                                                                                                                                                                                                                                                                                                                                                                                                                                                                                                                                                                                                        |        | 2.5     | -16.3  | -0.3             | -21.7          |                                     |                                 | -6.5                       | -1.1                        | -7.3               |         | 11.7        | -1.8              |                                                              | -4.0               | -11.7   | 26.6    | -6.6    | 7.6     | 7.8                   | -0.8    | 2.9     | 1.5     |         |         |         |         |         |         |         |         |         |         |         |                       |         |         |         |         |                         |      |      |       |      |      |      |      |      |      |      |      |      |       |      |      |      |      |      |      |      |      |      |      |      |                       |      |      |        |      |      |       |       |      |      |      |       |       |       |       |       |       |       |       |       |       |       |       |       |       |       |      |      |       |      |      |       |       |      |      |      |       |      |      |       |      |      |      |      |      |      |      |       |      |      |          |  |    |    |    |    |   |     |   |   |   |   |    |    |  |    |       |    |    |    |                  |    |    |    |           |  |     |       |      |       |  |  |      |      |      |  |      |      |  |      |       |      |      |     |     |      |     |     |

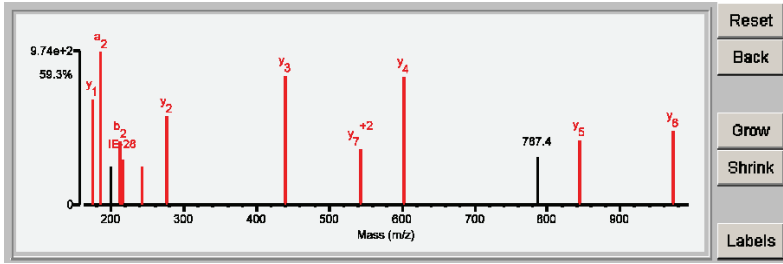

Result Summary

| Rank | Score | SPI (%) | BCS | # Unmatched Ions | Variable sites | Sequence                | MH <sup>+</sup> Calculated (Da) | MH <sup>+</sup> Error (Da) | MH <sup>+</sup> Error (ppm) | Protein MW (kDa) | Species | Accession # | Protein Name                                               |
|------|-------|---------|-----|------------------|----------------|-------------------------|---------------------------------|----------------------------|-----------------------------|------------------|---------|-------------|------------------------------------------------------------|
| 1    | 14.47 | 64.0    | 8   | 8/25             | K18k           | (K)FVADGIFKAELNEFLTR(E) | 1970.0382                       | 114.0681                   | 12.1                        | 26688.5/9.68     | HUMAN   | P23396      | 40S ribosomal protein S3 OS=Homo sapiens GN=RPS3 PE=1 SV=2 |

Detailed Results

| Rank | Score | SPI (%) | BCS | # Unmatched Ions | Variable sites | Sequence                | MH <sup>+</sup> Calculated (Da) | MH <sup>+</sup> Error (Da) | MH <sup>+</sup> Error (ppm) | Protein MW (kDa) | Species | Accession # | MS-Digest Index # | Protein Name                                               |         |         |         |         |         |         |         |         |         |                       |         |         |                       |                       |                       |          |          |      |
|------|-------|---------|-----|------------------|----------------|-------------------------|---------------------------------|----------------------------|-----------------------------|------------------|---------|-------------|-------------------|------------------------------------------------------------|---------|---------|---------|---------|---------|---------|---------|---------|---------|-----------------------|---------|---------|-----------------------|-----------------------|-----------------------|----------|----------|------|
| 1    | 14.47 | 64.0    | 8   | 8/25             | K18k           | (K)FVADGIFKAELNEFLTR(E) | 1970.0382                       | 114.0681                   | 12.1                        | 26688.5/9.68     | HUMAN   | P23396      | 683973            | 40S ribosomal protein S3 OS=Homo sapiens GN=RPS3 PE=1 SV=2 |         |         |         |         |         |         |         |         |         |                       |         |         |                       |                       |                       |          |          |      |
|      |       |         |     |                  |                | Fragment-ion (m/z)      | 70.063                          | 72.080                     | 84.079                      | 86.095           | 120.079 | 141.068     | 158.089           | 219.149                                                    | 220.151 | 230.147 | 247.145 | 357.184 | 389.248 | 514.311 | 536.317 | 585.348 | 665.360 | 741.394 <sup>+2</sup> | 746.385 | 779.413 | 884.490 <sup>+2</sup> | 919.468 <sup>+2</sup> | 948.559 <sup>+2</sup> | 1021.540 | 1092.582 |      |
|      |       |         |     |                  |                | Frac. Inten. (% of TIC) | 0.00                            | 0.09                       | 6.28                        | 0.25             | 0.32    | 2.46        | 4.87              | 12.19                                                      | 3.81    | 3.15    | 4.47    | 2.51    | 2.32    | 6.43    | 2.41    | 7.36    | 2.39    | 5.75                  | 4.58    | 4.32    | 3.96                  | 9.90                  | 2.57                  | 3.03     | 4.57     |      |
|      |       |         |     |                  |                | Rel. Inten. (% of BP)   | 0.04                            | 0.75                       | 51.54                       | 2.06             | 2.64    | 20.22       | 39.98             | 100.00                                                     | 31.23   | 25.88   | 36.65   | 20.60   | 19.04   | 52.79   | 19.77   | 60.43   | 19.64   | 47.14                 | 37.56   | 35.48   | 32.47                 | 81.26                 | 21.06                 | 24.85    | 37.54    |      |
|      |       |         |     |                  |                | Score                   | 0.20                            | 0.50                       | -0.52                       | 0.22             | 1.00    | -0.20       | 0.50              | 0.50                                                       | -0.31   | -0.26   | 0.50    | 0.75    | 1.50    | -0.53   | 1.50    | -0.60   | 1.50    | 1.50                  | 1.50    | 1.50    | 1.50                  | 1.50                  | 1.50                  | 1.50     | 1.50     | 1.50 |
|      |       |         |     |                  |                | Ion-type                | PR                              | V                          |                             | LI               | a1      |             | y1-NH3            | a2                                                         |         | b2      | LNE     |         |         |         |         | y4      | y5      | y11 <sup>+2</sup>     | ELNEFL  | y6      |                       | y15 <sup>+2</sup>     | y8                    | y9       |          |      |
|      |       |         |     |                  |                | Delta ppm               | -26.1                           | -16.3                      |                             | -16.6            | -25.6   |             | -20.3             | -5.9                                                       |         | -1.6    | 16.9    | -6.9    |         |         |         | -4.3    | -2.1    | 4.6                   | 15.5    | 11.1    |                       | -8.1                  |                       | 8.6      | 12.4     |      |

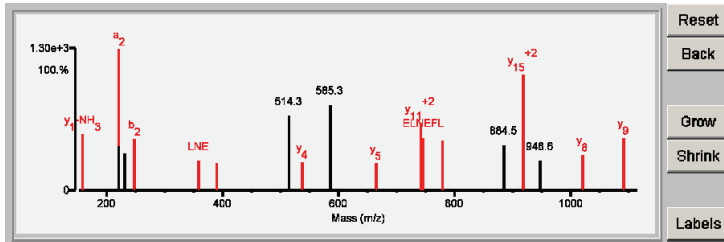

Result Summary

| Rank | Score | SPI (%) | BCS | # Unmatched ions | Variable sites | Sequence             | MH <sup>+</sup> Calculated (Da) | MH <sup>+</sup> Error (Da) | MH <sup>+</sup> Error (ppm) | Protein MW pI (Da) | Species | Accession # | Protein Name                                               |
|------|-------|---------|-----|------------------|----------------|----------------------|---------------------------------|----------------------------|-----------------------------|--------------------|---------|-------------|------------------------------------------------------------|
| 1    | 17.79 | 77.5    | 6   | 6/25             | K197k          | (K)IMLPWDPTGKIGPK(K) | 1552.8556                       | 114.0526                   | 5.8                         | 26688.5/9.68       | HUMAN   | P23396      | 40S ribosomal protein S3 OS=Homo sapiens GN=RPS3 PE=1 SV=2 |
| 2    | 15.31 | 73.8    | 6   | 8/25             | K201k          | (K)IMLPWDPTGKIGPK(K) | 1552.8556                       | 114.0526                   | 5.8                         | 26688.5/9.68       | HUMAN   | P23396      | 40S ribosomal protein S3 OS=Homo sapiens GN=RPS3 PE=1 SV=2 |

Detailed Results

| Rank                                                                                                                                                                                                                                                                                                                                                                                                                                                                                                                                                                                                                                                                                                                                                                                                                                                                                                                                                                                                                                                                                                                                                                                                                                                                                                                                                                                                                                                                                                                                                                                                                                                                                                                                                                                                                                                                                                                                                                                                                                                                                                                                                                                                                                                                                                                                                                                                                                                                                                                                                                                                                                                                                                                                                                                                                                                                                                                                                                                                                                                                                                                                                     | Score  | SPI (%) | BCS    | # Unmatched ions | Variable sites | Sequence                    | MH <sup>+</sup> Calculated (Da) | MH <sup>+</sup> Error (Da) | MH <sup>+</sup> Error (ppm) | Protein MW pI (Da) | Species | Accession # | MS-Digest Index # | Protein Name                                               |                    |         |                       |         |         |                       |                  |         |         |          |          |         |         |         |         |         |         |                       |         |         |                       |         |         |         |          |          |                        |      |      |       |      |      |      |      |      |      |       |      |      |      |      |      |      |      |      |      |      |      |      |      |      |      |                      |      |      |        |       |       |      |       |       |       |       |       |       |       |       |       |       |       |       |      |       |       |       |       |       |       |       |      |      |      |       |       |      |       |      |       |      |      |      |      |       |      |      |      |      |      |      |      |       |      |      |      |          |    |    |    |  |  |   |  |    |  |    |    |       |    |  |     |    |                  |      |       |                   |                  |  |    |    |     |           |      |       |  |      |  |       |  |       |  |       |      |      |      |  |       |     |       |      |       |      |       |  |      |      |      |  |  |  |    |  |  |  |  |  |  |       |    |  |  |  |  |  |  |  |  |  |  |  |  |  |  |  |  |  |      |  |  |  |  |  |  |       |      |  |  |  |  |  |  |  |  |  |  |  |  |  |  |
|----------------------------------------------------------------------------------------------------------------------------------------------------------------------------------------------------------------------------------------------------------------------------------------------------------------------------------------------------------------------------------------------------------------------------------------------------------------------------------------------------------------------------------------------------------------------------------------------------------------------------------------------------------------------------------------------------------------------------------------------------------------------------------------------------------------------------------------------------------------------------------------------------------------------------------------------------------------------------------------------------------------------------------------------------------------------------------------------------------------------------------------------------------------------------------------------------------------------------------------------------------------------------------------------------------------------------------------------------------------------------------------------------------------------------------------------------------------------------------------------------------------------------------------------------------------------------------------------------------------------------------------------------------------------------------------------------------------------------------------------------------------------------------------------------------------------------------------------------------------------------------------------------------------------------------------------------------------------------------------------------------------------------------------------------------------------------------------------------------------------------------------------------------------------------------------------------------------------------------------------------------------------------------------------------------------------------------------------------------------------------------------------------------------------------------------------------------------------------------------------------------------------------------------------------------------------------------------------------------------------------------------------------------------------------------------------------------------------------------------------------------------------------------------------------------------------------------------------------------------------------------------------------------------------------------------------------------------------------------------------------------------------------------------------------------------------------------------------------------------------------------------------------------|--------|---------|--------|------------------|----------------|-----------------------------|---------------------------------|----------------------------|-----------------------------|--------------------|---------|-------------|-------------------|------------------------------------------------------------|--------------------|---------|-----------------------|---------|---------|-----------------------|------------------|---------|---------|----------|----------|---------|---------|---------|---------|---------|---------|-----------------------|---------|---------|-----------------------|---------|---------|---------|----------|----------|------------------------|------|------|-------|------|------|------|------|------|------|-------|------|------|------|------|------|------|------|------|------|------|------|------|------|------|------|----------------------|------|------|--------|-------|-------|------|-------|-------|-------|-------|-------|-------|-------|-------|-------|-------|-------|-------|------|-------|-------|-------|-------|-------|-------|-------|------|------|------|-------|-------|------|-------|------|-------|------|------|------|------|-------|------|------|------|------|------|------|------|-------|------|------|------|----------|----|----|----|--|--|---|--|----|--|----|----|-------|----|--|-----|----|------------------|------|-------|-------------------|------------------|--|----|----|-----|-----------|------|-------|--|------|--|-------|--|-------|--|-------|------|------|------|--|-------|-----|-------|------|-------|------|-------|--|------|------|------|--|--|--|----|--|--|--|--|--|--|-------|----|--|--|--|--|--|--|--|--|--|--|--|--|--|--|--|--|--|------|--|--|--|--|--|--|-------|------|--|--|--|--|--|--|--|--|--|--|--|--|--|--|
| 1                                                                                                                                                                                                                                                                                                                                                                                                                                                                                                                                                                                                                                                                                                                                                                                                                                                                                                                                                                                                                                                                                                                                                                                                                                                                                                                                                                                                                                                                                                                                                                                                                                                                                                                                                                                                                                                                                                                                                                                                                                                                                                                                                                                                                                                                                                                                                                                                                                                                                                                                                                                                                                                                                                                                                                                                                                                                                                                                                                                                                                                                                                                                                        | 17.79  | 77.5    | 6      | 6/25             | K197k          | (K)IMLPW/D/P/TGK/I G P K(K) | 1552.8556                       | 114.0526                   | 5.8                         | 26688.5/9.68       | HUMAN   | P23396      | 683973            | 40S ribosomal protein S3 OS=Homo sapiens GN=RPS3 PE=1 SV=2 |                    |         |                       |         |         |                       |                  |         |         |          |          |         |         |         |         |         |         |                       |         |         |                       |         |         |         |          |          |                        |      |      |       |      |      |      |      |      |      |       |      |      |      |      |      |      |      |      |      |      |      |      |      |      |      |                      |      |      |        |       |       |      |       |       |       |       |       |       |       |       |       |       |       |       |      |       |       |       |       |       |       |       |      |      |      |       |       |      |       |      |       |      |      |      |      |       |      |      |      |      |      |      |      |       |      |      |      |          |    |    |    |  |  |   |  |    |  |    |    |       |    |  |     |    |                  |      |       |                   |                  |  |    |    |     |           |      |       |  |      |  |       |  |       |  |       |      |      |      |  |       |     |       |      |       |      |       |  |      |      |      |  |  |  |    |  |  |  |  |  |  |       |    |  |  |  |  |  |  |  |  |  |  |  |  |  |  |  |  |  |      |  |  |  |  |  |  |       |      |  |  |  |  |  |  |  |  |  |  |  |  |  |  |
| <table border="1"> <thead> <tr> <th>Fragment-ion (m/z)</th> <th>70.065</th> <th>84.079</th> <th>86.097</th> <th>87.096</th> <th>125.074</th> <th>159.088</th> <th>169.135</th> <th>171.107</th> <th>199.177</th> <th>217.135</th> <th>245.131</th> <th>256.149</th> <th>284.149</th> <th>300.185</th> <th>399.159</th> <th>414.275</th> <th>456.264<sup>+2</sup></th> <th>500.214</th> <th>611.340</th> <th>655.346<sup>+2</sup></th> <th>711.882</th> <th>712.396</th> <th>911.523</th> <th>1026.554</th> <th>1212.631</th> </tr> </thead> <tbody> <tr> <td>Frac. Inten.(% of TIC)</td> <td>0.01</td> <td>0.11</td> <td>15.94</td> <td>4.21</td> <td>2.26</td> <td>0.06</td> <td>7.15</td> <td>1.60</td> <td>2.58</td> <td>10.33</td> <td>5.08</td> <td>2.39</td> <td>3.06</td> <td>1.78</td> <td>6.73</td> <td>2.09</td> <td>2.21</td> <td>1.63</td> <td>1.55</td> <td>9.43</td> <td>3.01</td> <td>4.53</td> <td>6.42</td> <td>3.35</td> <td>2.48</td> </tr> <tr> <td>Rel. Inten.(% of BP)</td> <td>0.04</td> <td>0.71</td> <td>100.00</td> <td>26.43</td> <td>14.17</td> <td>0.36</td> <td>44.87</td> <td>10.02</td> <td>16.16</td> <td>64.80</td> <td>31.88</td> <td>14.98</td> <td>19.16</td> <td>11.15</td> <td>42.19</td> <td>13.13</td> <td>13.87</td> <td>10.24</td> <td>9.75</td> <td>59.15</td> <td>18.86</td> <td>28.38</td> <td>40.27</td> <td>21.04</td> <td>15.56</td> </tr> <tr> <td>Score</td> <td>0.20</td> <td>0.50</td> <td>0.50</td> <td>-0.26</td> <td>-0.14</td> <td>2.00</td> <td>-0.45</td> <td>0.75</td> <td>-0.16</td> <td>0.50</td> <td>0.75</td> <td>0.50</td> <td>0.75</td> <td>-0.11</td> <td>0.75</td> <td>1.50</td> <td>1.50</td> <td>0.75</td> <td>0.75</td> <td>1.50</td> <td>1.50</td> <td>-0.28</td> <td>1.50</td> <td>1.50</td> <td>1.50</td> </tr> <tr> <td>Ion-type</td> <td>PR</td> <td>KQ</td> <td>a1</td> <td></td> <td></td> <td>W</td> <td></td> <td>IG</td> <td></td> <td>a2</td> <td>b2</td> <td>PW-28</td> <td>PW</td> <td></td> <td>WDP</td> <td>y4</td> <td>y8<sup>+2</sup></td> <td>WDPT</td> <td>PTGkl</td> <td>y11<sup>+2</sup></td> <td>y<sup>+12</sup></td> <td></td> <td>y8</td> <td>y9</td> <td>y10</td> </tr> <tr> <td>Delta ppm</td> <td>-1.8</td> <td>-25.9</td> <td></td> <td>-2.6</td> <td></td> <td>-22.5</td> <td></td> <td>-37.4</td> <td></td> <td>-15.7</td> <td>-7.4</td> <td>14.3</td> <td>29.0</td> <td></td> <td>-21.8</td> <td>9.2</td> <td>-10.5</td> <td>-1.7</td> <td>-20.3</td> <td>-4.7</td> <td>-11.8</td> <td></td> <td>-9.1</td> <td>-3.6</td> <td>-5.1</td> </tr> <tr> <td></td> <td></td> <td></td> <td>LI</td> <td></td> <td></td> <td></td> <td></td> <td></td> <td></td> <td>ML-28</td> <td>ML</td> <td></td> </tr> <tr> <td></td> <td></td> <td></td> <td>10.2</td> <td></td> <td></td> <td></td> <td></td> <td></td> <td></td> <td>-15.7</td> <td>-7.4</td> <td></td> </tr> </tbody> </table> |        |         |        |                  |                |                             |                                 |                            |                             |                    |         |             |                   |                                                            | Fragment-ion (m/z) | 70.065  | 84.079                | 86.097  | 87.096  | 125.074               | 159.088          | 169.135 | 171.107 | 199.177  | 217.135  | 245.131 | 256.149 | 284.149 | 300.185 | 399.159 | 414.275 | 456.264 <sup>+2</sup> | 500.214 | 611.340 | 655.346 <sup>+2</sup> | 711.882 | 712.396 | 911.523 | 1026.554 | 1212.631 | Frac. Inten.(% of TIC) | 0.01 | 0.11 | 15.94 | 4.21 | 2.26 | 0.06 | 7.15 | 1.60 | 2.58 | 10.33 | 5.08 | 2.39 | 3.06 | 1.78 | 6.73 | 2.09 | 2.21 | 1.63 | 1.55 | 9.43 | 3.01 | 4.53 | 6.42 | 3.35 | 2.48 | Rel. Inten.(% of BP) | 0.04 | 0.71 | 100.00 | 26.43 | 14.17 | 0.36 | 44.87 | 10.02 | 16.16 | 64.80 | 31.88 | 14.98 | 19.16 | 11.15 | 42.19 | 13.13 | 13.87 | 10.24 | 9.75 | 59.15 | 18.86 | 28.38 | 40.27 | 21.04 | 15.56 | Score | 0.20 | 0.50 | 0.50 | -0.26 | -0.14 | 2.00 | -0.45 | 0.75 | -0.16 | 0.50 | 0.75 | 0.50 | 0.75 | -0.11 | 0.75 | 1.50 | 1.50 | 0.75 | 0.75 | 1.50 | 1.50 | -0.28 | 1.50 | 1.50 | 1.50 | Ion-type | PR | KQ | a1 |  |  | W |  | IG |  | a2 | b2 | PW-28 | PW |  | WDP | y4 | y8 <sup>+2</sup> | WDPT | PTGkl | y11 <sup>+2</sup> | y <sup>+12</sup> |  | y8 | y9 | y10 | Delta ppm | -1.8 | -25.9 |  | -2.6 |  | -22.5 |  | -37.4 |  | -15.7 | -7.4 | 14.3 | 29.0 |  | -21.8 | 9.2 | -10.5 | -1.7 | -20.3 | -4.7 | -11.8 |  | -9.1 | -3.6 | -5.1 |  |  |  | LI |  |  |  |  |  |  | ML-28 | ML |  |  |  |  |  |  |  |  |  |  |  |  |  |  |  |  |  | 10.2 |  |  |  |  |  |  | -15.7 | -7.4 |  |  |  |  |  |  |  |  |  |  |  |  |  |  |
| Fragment-ion (m/z)                                                                                                                                                                                                                                                                                                                                                                                                                                                                                                                                                                                                                                                                                                                                                                                                                                                                                                                                                                                                                                                                                                                                                                                                                                                                                                                                                                                                                                                                                                                                                                                                                                                                                                                                                                                                                                                                                                                                                                                                                                                                                                                                                                                                                                                                                                                                                                                                                                                                                                                                                                                                                                                                                                                                                                                                                                                                                                                                                                                                                                                                                                                                       | 70.065 | 84.079  | 86.097 | 87.096           | 125.074        | 159.088                     | 169.135                         | 171.107                    | 199.177                     | 217.135            | 245.131 | 256.149     | 284.149           | 300.185                                                    | 399.159            | 414.275 | 456.264 <sup>+2</sup> | 500.214 | 611.340 | 655.346 <sup>+2</sup> | 711.882          | 712.396 | 911.523 | 1026.554 | 1212.631 |         |         |         |         |         |         |                       |         |         |                       |         |         |         |          |          |                        |      |      |       |      |      |      |      |      |      |       |      |      |      |      |      |      |      |      |      |      |      |      |      |      |      |                      |      |      |        |       |       |      |       |       |       |       |       |       |       |       |       |       |       |       |      |       |       |       |       |       |       |       |      |      |      |       |       |      |       |      |       |      |      |      |      |       |      |      |      |      |      |      |      |       |      |      |      |          |    |    |    |  |  |   |  |    |  |    |    |       |    |  |     |    |                  |      |       |                   |                  |  |    |    |     |           |      |       |  |      |  |       |  |       |  |       |      |      |      |  |       |     |       |      |       |      |       |  |      |      |      |  |  |  |    |  |  |  |  |  |  |       |    |  |  |  |  |  |  |  |  |  |  |  |  |  |  |  |  |  |      |  |  |  |  |  |  |       |      |  |  |  |  |  |  |  |  |  |  |  |  |  |  |
| Frac. Inten.(% of TIC)                                                                                                                                                                                                                                                                                                                                                                                                                                                                                                                                                                                                                                                                                                                                                                                                                                                                                                                                                                                                                                                                                                                                                                                                                                                                                                                                                                                                                                                                                                                                                                                                                                                                                                                                                                                                                                                                                                                                                                                                                                                                                                                                                                                                                                                                                                                                                                                                                                                                                                                                                                                                                                                                                                                                                                                                                                                                                                                                                                                                                                                                                                                                   | 0.01   | 0.11    | 15.94  | 4.21             | 2.26           | 0.06                        | 7.15                            | 1.60                       | 2.58                        | 10.33              | 5.08    | 2.39        | 3.06              | 1.78                                                       | 6.73               | 2.09    | 2.21                  | 1.63    | 1.55    | 9.43                  | 3.01             | 4.53    | 6.42    | 3.35     | 2.48     |         |         |         |         |         |         |                       |         |         |                       |         |         |         |          |          |                        |      |      |       |      |      |      |      |      |      |       |      |      |      |      |      |      |      |      |      |      |      |      |      |      |      |                      |      |      |        |       |       |      |       |       |       |       |       |       |       |       |       |       |       |       |      |       |       |       |       |       |       |       |      |      |      |       |       |      |       |      |       |      |      |      |      |       |      |      |      |      |      |      |      |       |      |      |      |          |    |    |    |  |  |   |  |    |  |    |    |       |    |  |     |    |                  |      |       |                   |                  |  |    |    |     |           |      |       |  |      |  |       |  |       |  |       |      |      |      |  |       |     |       |      |       |      |       |  |      |      |      |  |  |  |    |  |  |  |  |  |  |       |    |  |  |  |  |  |  |  |  |  |  |  |  |  |  |  |  |  |      |  |  |  |  |  |  |       |      |  |  |  |  |  |  |  |  |  |  |  |  |  |  |
| Rel. Inten.(% of BP)                                                                                                                                                                                                                                                                                                                                                                                                                                                                                                                                                                                                                                                                                                                                                                                                                                                                                                                                                                                                                                                                                                                                                                                                                                                                                                                                                                                                                                                                                                                                                                                                                                                                                                                                                                                                                                                                                                                                                                                                                                                                                                                                                                                                                                                                                                                                                                                                                                                                                                                                                                                                                                                                                                                                                                                                                                                                                                                                                                                                                                                                                                                                     | 0.04   | 0.71    | 100.00 | 26.43            | 14.17          | 0.36                        | 44.87                           | 10.02                      | 16.16                       | 64.80              | 31.88   | 14.98       | 19.16             | 11.15                                                      | 42.19              | 13.13   | 13.87                 | 10.24   | 9.75    | 59.15                 | 18.86            | 28.38   | 40.27   | 21.04    | 15.56    |         |         |         |         |         |         |                       |         |         |                       |         |         |         |          |          |                        |      |      |       |      |      |      |      |      |      |       |      |      |      |      |      |      |      |      |      |      |      |      |      |      |      |                      |      |      |        |       |       |      |       |       |       |       |       |       |       |       |       |       |       |       |      |       |       |       |       |       |       |       |      |      |      |       |       |      |       |      |       |      |      |      |      |       |      |      |      |      |      |      |      |       |      |      |      |          |    |    |    |  |  |   |  |    |  |    |    |       |    |  |     |    |                  |      |       |                   |                  |  |    |    |     |           |      |       |  |      |  |       |  |       |  |       |      |      |      |  |       |     |       |      |       |      |       |  |      |      |      |  |  |  |    |  |  |  |  |  |  |       |    |  |  |  |  |  |  |  |  |  |  |  |  |  |  |  |  |  |      |  |  |  |  |  |  |       |      |  |  |  |  |  |  |  |  |  |  |  |  |  |  |
| Score                                                                                                                                                                                                                                                                                                                                                                                                                                                                                                                                                                                                                                                                                                                                                                                                                                                                                                                                                                                                                                                                                                                                                                                                                                                                                                                                                                                                                                                                                                                                                                                                                                                                                                                                                                                                                                                                                                                                                                                                                                                                                                                                                                                                                                                                                                                                                                                                                                                                                                                                                                                                                                                                                                                                                                                                                                                                                                                                                                                                                                                                                                                                                    | 0.20   | 0.50    | 0.50   | -0.26            | -0.14          | 2.00                        | -0.45                           | 0.75                       | -0.16                       | 0.50               | 0.75    | 0.50        | 0.75              | -0.11                                                      | 0.75               | 1.50    | 1.50                  | 0.75    | 0.75    | 1.50                  | 1.50             | -0.28   | 1.50    | 1.50     | 1.50     |         |         |         |         |         |         |                       |         |         |                       |         |         |         |          |          |                        |      |      |       |      |      |      |      |      |      |       |      |      |      |      |      |      |      |      |      |      |      |      |      |      |      |                      |      |      |        |       |       |      |       |       |       |       |       |       |       |       |       |       |       |       |      |       |       |       |       |       |       |       |      |      |      |       |       |      |       |      |       |      |      |      |      |       |      |      |      |      |      |      |      |       |      |      |      |          |    |    |    |  |  |   |  |    |  |    |    |       |    |  |     |    |                  |      |       |                   |                  |  |    |    |     |           |      |       |  |      |  |       |  |       |  |       |      |      |      |  |       |     |       |      |       |      |       |  |      |      |      |  |  |  |    |  |  |  |  |  |  |       |    |  |  |  |  |  |  |  |  |  |  |  |  |  |  |  |  |  |      |  |  |  |  |  |  |       |      |  |  |  |  |  |  |  |  |  |  |  |  |  |  |
| Ion-type                                                                                                                                                                                                                                                                                                                                                                                                                                                                                                                                                                                                                                                                                                                                                                                                                                                                                                                                                                                                                                                                                                                                                                                                                                                                                                                                                                                                                                                                                                                                                                                                                                                                                                                                                                                                                                                                                                                                                                                                                                                                                                                                                                                                                                                                                                                                                                                                                                                                                                                                                                                                                                                                                                                                                                                                                                                                                                                                                                                                                                                                                                                                                 | PR     | KQ      | a1     |                  |                | W                           |                                 | IG                         |                             | a2                 | b2      | PW-28       | PW                |                                                            | WDP                | y4      | y8 <sup>+2</sup>      | WDPT    | PTGkl   | y11 <sup>+2</sup>     | y <sup>+12</sup> |         | y8      | y9       | y10      |         |         |         |         |         |         |                       |         |         |                       |         |         |         |          |          |                        |      |      |       |      |      |      |      |      |      |       |      |      |      |      |      |      |      |      |      |      |      |      |      |      |      |                      |      |      |        |       |       |      |       |       |       |       |       |       |       |       |       |       |       |       |      |       |       |       |       |       |       |       |      |      |      |       |       |      |       |      |       |      |      |      |      |       |      |      |      |      |      |      |      |       |      |      |      |          |    |    |    |  |  |   |  |    |  |    |    |       |    |  |     |    |                  |      |       |                   |                  |  |    |    |     |           |      |       |  |      |  |       |  |       |  |       |      |      |      |  |       |     |       |      |       |      |       |  |      |      |      |  |  |  |    |  |  |  |  |  |  |       |    |  |  |  |  |  |  |  |  |  |  |  |  |  |  |  |  |  |      |  |  |  |  |  |  |       |      |  |  |  |  |  |  |  |  |  |  |  |  |  |  |
| Delta ppm                                                                                                                                                                                                                                                                                                                                                                                                                                                                                                                                                                                                                                                                                                                                                                                                                                                                                                                                                                                                                                                                                                                                                                                                                                                                                                                                                                                                                                                                                                                                                                                                                                                                                                                                                                                                                                                                                                                                                                                                                                                                                                                                                                                                                                                                                                                                                                                                                                                                                                                                                                                                                                                                                                                                                                                                                                                                                                                                                                                                                                                                                                                                                | -1.8   | -25.9   |        | -2.6             |                | -22.5                       |                                 | -37.4                      |                             | -15.7              | -7.4    | 14.3        | 29.0              |                                                            | -21.8              | 9.2     | -10.5                 | -1.7    | -20.3   | -4.7                  | -11.8            |         | -9.1    | -3.6     | -5.1     |         |         |         |         |         |         |                       |         |         |                       |         |         |         |          |          |                        |      |      |       |      |      |      |      |      |      |       |      |      |      |      |      |      |      |      |      |      |      |      |      |      |      |                      |      |      |        |       |       |      |       |       |       |       |       |       |       |       |       |       |       |       |      |       |       |       |       |       |       |       |      |      |      |       |       |      |       |      |       |      |      |      |      |       |      |      |      |      |      |      |      |       |      |      |      |          |    |    |    |  |  |   |  |    |  |    |    |       |    |  |     |    |                  |      |       |                   |                  |  |    |    |     |           |      |       |  |      |  |       |  |       |  |       |      |      |      |  |       |     |       |      |       |      |       |  |      |      |      |  |  |  |    |  |  |  |  |  |  |       |    |  |  |  |  |  |  |  |  |  |  |  |  |  |  |  |  |  |      |  |  |  |  |  |  |       |      |  |  |  |  |  |  |  |  |  |  |  |  |  |  |
|                                                                                                                                                                                                                                                                                                                                                                                                                                                                                                                                                                                                                                                                                                                                                                                                                                                                                                                                                                                                                                                                                                                                                                                                                                                                                                                                                                                                                                                                                                                                                                                                                                                                                                                                                                                                                                                                                                                                                                                                                                                                                                                                                                                                                                                                                                                                                                                                                                                                                                                                                                                                                                                                                                                                                                                                                                                                                                                                                                                                                                                                                                                                                          |        |         | LI     |                  |                |                             |                                 |                            |                             | ML-28              | ML      |             |                   |                                                            |                    |         |                       |         |         |                       |                  |         |         |          |          |         |         |         |         |         |         |                       |         |         |                       |         |         |         |          |          |                        |      |      |       |      |      |      |      |      |      |       |      |      |      |      |      |      |      |      |      |      |      |      |      |      |      |                      |      |      |        |       |       |      |       |       |       |       |       |       |       |       |       |       |       |       |      |       |       |       |       |       |       |       |      |      |      |       |       |      |       |      |       |      |      |      |      |       |      |      |      |      |      |      |      |       |      |      |      |          |    |    |    |  |  |   |  |    |  |    |    |       |    |  |     |    |                  |      |       |                   |                  |  |    |    |     |           |      |       |  |      |  |       |  |       |  |       |      |      |      |  |       |     |       |      |       |      |       |  |      |      |      |  |  |  |    |  |  |  |  |  |  |       |    |  |  |  |  |  |  |  |  |  |  |  |  |  |  |  |  |  |      |  |  |  |  |  |  |       |      |  |  |  |  |  |  |  |  |  |  |  |  |  |  |
|                                                                                                                                                                                                                                                                                                                                                                                                                                                                                                                                                                                                                                                                                                                                                                                                                                                                                                                                                                                                                                                                                                                                                                                                                                                                                                                                                                                                                                                                                                                                                                                                                                                                                                                                                                                                                                                                                                                                                                                                                                                                                                                                                                                                                                                                                                                                                                                                                                                                                                                                                                                                                                                                                                                                                                                                                                                                                                                                                                                                                                                                                                                                                          |        |         | 10.2   |                  |                |                             |                                 |                            |                             | -15.7              | -7.4    |             |                   |                                                            |                    |         |                       |         |         |                       |                  |         |         |          |          |         |         |         |         |         |         |                       |         |         |                       |         |         |         |          |          |                        |      |      |       |      |      |      |      |      |      |       |      |      |      |      |      |      |      |      |      |      |      |      |      |      |      |                      |      |      |        |       |       |      |       |       |       |       |       |       |       |       |       |       |       |       |      |       |       |       |       |       |       |       |      |      |      |       |       |      |       |      |       |      |      |      |      |       |      |      |      |      |      |      |      |       |      |      |      |          |    |    |    |  |  |   |  |    |  |    |    |       |    |  |     |    |                  |      |       |                   |                  |  |    |    |     |           |      |       |  |      |  |       |  |       |  |       |      |      |      |  |       |     |       |      |       |      |       |  |      |      |      |  |  |  |    |  |  |  |  |  |  |       |    |  |  |  |  |  |  |  |  |  |  |  |  |  |  |  |  |  |      |  |  |  |  |  |  |       |      |  |  |  |  |  |  |  |  |  |  |  |  |  |  |

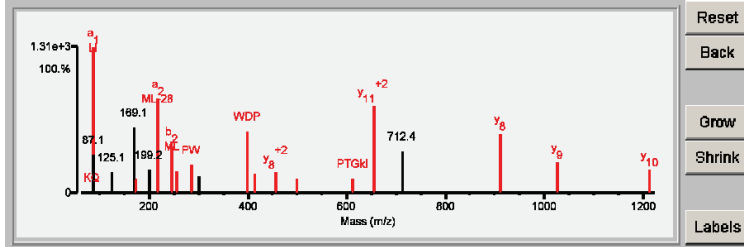

Reset

Back

Grow

Shrink

Labels

Result Summary

| Rank | Score | SPI (%) | BCS | # Unmatched ions | Variable sites | Sequence                 | MH <sup>+</sup> Calculated (Da) | MH <sup>+</sup> Error (Da) | MH <sup>+</sup> Error (ppm) | Protein MW/pl (Da) | Species | Accession # | Protein Name                                                              |
|------|-------|---------|-----|------------------|----------------|--------------------------|---------------------------------|----------------------------|-----------------------------|--------------------|---------|-------------|---------------------------------------------------------------------------|
| 1    | 21.40 | 80.5    | 8   | 6/25             | K90k           | (R)EGFPEGSVELYAEKVATR(G) | 2000.0124                       | 114.0588                   | 7.5                         | 26688.5/9.68       | HUMAN   | P23396      | 40S ribosomal protein S3 OS=Homo sapiens GN=RPS3 PE=1 SV=2                |
| 2    | 4.24  | 51.3    | 2   | 16/25            | M1m            | (-)mSVVGIDLGLNCYIAVAR(S) | 2096.0824                       | 15.9888                    | -2.9                        | 94487.0/5.63       | HUMAN   | Q95757      | Heat shock 70 kDa protein 4L OS=Homo sapiens GN=HSPA4L PE=1 SV=2          |
| 3    | 3.24  | 51.3    | 0   | 15/25            | K424k          | (K)EFGWPLEKAYNYVKQK(R)   | 2000.0276                       | 114.0435                   | 0.3                         | 115511.7/5.87      | HUMAN   | Q8WYL5      | Protein phosphatase Slingshot homolog 1 OS=Homo sapiens GN=SSH1 PE=1 SV=2 |
| 3    | 3.24  | 51.3    | 0   | 15/25            | K418k          | (K)EFGWPLEKAYNYVKQK(R)   | 2000.0276                       | 114.0435                   | 0.3                         | 115511.7/5.87      | HUMAN   | Q8WYL5      | Protein phosphatase Slingshot homolog 1 OS=Homo sapiens GN=SSH1 PE=1 SV=2 |
| 3    | 3.24  | 51.3    | 0   | 15/25            | K426k          | (K)EFGWPLEKAYNYVKQK(R)   | 2000.0276                       | 114.0435                   | 0.3                         | 115511.7/5.87      | HUMAN   | Q8WYL5      | Protein phosphatase Slingshot homolog 1 OS=Homo sapiens GN=SSH1 PE=1 SV=2 |

Detailed Results

| Rank                                                                                                                                                                                                                                                                                                                                                                                                                                                                                                                                                                                                                                                                                                                                                                                                                                                                                                                                                                                                                                                                                                                                                                                                                                                                                                                                                                                                                                                                                                                                                                                                                                                                                                                                                                                                                                                                                                                                                                                                                                                                                                                                                                                                                                                                                                                                                                                                                                                                                                                                                                                                                                                                                                                                                                                                                            | Score  | SPI (%) | BCS            | # Unmatched ions | Variable sites | Sequence                    | MH <sup>+</sup> Calculated (Da) | MH <sup>+</sup> Error (Da) | MH <sup>+</sup> Error (ppm) | Protein MW/pl (Da)    | Species               | Accession #     | MS-Digest Index #             | Protein Name                                               |                    |         |         |                |                                                 |                               |                |                               |                               |                |                       |                       |         |                       |         |         |         |         |         |                       |                       |         |                       |                       |          |          |                        |      |      |      |      |      |      |      |      |      |      |      |      |       |      |      |      |      |      |      |       |      |      |      |      |      |                      |      |      |      |      |      |       |       |       |       |       |       |      |       |      |       |      |      |       |      |        |       |       |       |       |       |       |      |      |      |      |       |      |       |      |       |      |       |      |      |      |       |       |      |      |      |      |      |      |      |      |      |          |    |    |                |   |  |                |  |                |  |                 |  |                 |                               |        |  |  |         |                |                                                 |                               |                |                               |                               |                |                 |           |      |      |  |       |      |  |       |  |  |      |  |      |      |      |  |  |     |     |       |      |      |      |     |      |      |
|---------------------------------------------------------------------------------------------------------------------------------------------------------------------------------------------------------------------------------------------------------------------------------------------------------------------------------------------------------------------------------------------------------------------------------------------------------------------------------------------------------------------------------------------------------------------------------------------------------------------------------------------------------------------------------------------------------------------------------------------------------------------------------------------------------------------------------------------------------------------------------------------------------------------------------------------------------------------------------------------------------------------------------------------------------------------------------------------------------------------------------------------------------------------------------------------------------------------------------------------------------------------------------------------------------------------------------------------------------------------------------------------------------------------------------------------------------------------------------------------------------------------------------------------------------------------------------------------------------------------------------------------------------------------------------------------------------------------------------------------------------------------------------------------------------------------------------------------------------------------------------------------------------------------------------------------------------------------------------------------------------------------------------------------------------------------------------------------------------------------------------------------------------------------------------------------------------------------------------------------------------------------------------------------------------------------------------------------------------------------------------------------------------------------------------------------------------------------------------------------------------------------------------------------------------------------------------------------------------------------------------------------------------------------------------------------------------------------------------------------------------------------------------------------------------------------------------|--------|---------|----------------|------------------|----------------|-----------------------------|---------------------------------|----------------------------|-----------------------------|-----------------------|-----------------------|-----------------|-------------------------------|------------------------------------------------------------|--------------------|---------|---------|----------------|-------------------------------------------------|-------------------------------|----------------|-------------------------------|-------------------------------|----------------|-----------------------|-----------------------|---------|-----------------------|---------|---------|---------|---------|---------|-----------------------|-----------------------|---------|-----------------------|-----------------------|----------|----------|------------------------|------|------|------|------|------|------|------|------|------|------|------|------|-------|------|------|------|------|------|------|-------|------|------|------|------|------|----------------------|------|------|------|------|------|-------|-------|-------|-------|-------|-------|------|-------|------|-------|------|------|-------|------|--------|-------|-------|-------|-------|-------|-------|------|------|------|------|-------|------|-------|------|-------|------|-------|------|------|------|-------|-------|------|------|------|------|------|------|------|------|------|----------|----|----|----------------|---|--|----------------|--|----------------|--|-----------------|--|-----------------|-------------------------------|--------|--|--|---------|----------------|-------------------------------------------------|-------------------------------|----------------|-------------------------------|-------------------------------|----------------|-----------------|-----------|------|------|--|-------|------|--|-------|--|--|------|--|------|------|------|--|--|-----|-----|-------|------|------|------|-----|------|------|
| 1                                                                                                                                                                                                                                                                                                                                                                                                                                                                                                                                                                                                                                                                                                                                                                                                                                                                                                                                                                                                                                                                                                                                                                                                                                                                                                                                                                                                                                                                                                                                                                                                                                                                                                                                                                                                                                                                                                                                                                                                                                                                                                                                                                                                                                                                                                                                                                                                                                                                                                                                                                                                                                                                                                                                                                                                                               | 21.40  | 80.5    | 8              | 6/25             | K90k           | (R)EFGIPEPESVLELYAEKVATR(G) | 2000.0124                       | 114.0588                   | 7.5                         | 26688.5/9.68          | HUMAN                 | P23396          | 341987                        | 40S ribosomal protein S3 OS=Homo sapiens GN=RPS3 PE=1 SV=2 |                    |         |         |                |                                                 |                               |                |                               |                               |                |                       |                       |         |                       |         |         |         |         |         |                       |                       |         |                       |                       |          |          |                        |      |      |      |      |      |      |      |      |      |      |      |      |       |      |      |      |      |      |      |       |      |      |      |      |      |                      |      |      |      |      |      |       |       |       |       |       |       |      |       |      |       |      |      |       |      |        |       |       |       |       |       |       |      |      |      |      |       |      |       |      |       |      |       |      |      |      |       |       |      |      |      |      |      |      |      |      |      |          |    |    |                |   |  |                |  |                |  |                 |  |                 |                               |        |  |  |         |                |                                                 |                               |                |                               |                               |                |                 |           |      |      |  |       |      |  |       |  |  |      |  |      |      |      |  |  |     |     |       |      |      |      |     |      |      |
| <table border="1"> <thead> <tr> <th>Fragment-ion (m/z)</th> <th>70.066</th> <th>86.098</th> <th>120.079</th> <th>136.075</th> <th>199.177</th> <th>205.094</th> <th>227.168</th> <th>347.204</th> <th>371.178</th> <th>444.759<sup>+2</sup></th> <th>446.264<sup>+2</sup></th> <th>526.299</th> <th>588.313<sup>+3</sup></th> <th>599.278</th> <th>637.334</th> <th>679.209</th> <th>712.354</th> <th>817.458</th> <th>872.928<sup>+2</sup></th> <th>881.946<sup>+2</sup></th> <th>888.486</th> <th>955.519<sup>+2</sup></th> <th>984.002<sup>+2</sup></th> <th>1051.552</th> <th>1293.697</th> </tr> </thead> <tbody> <tr> <td>Frac. Inten.(% of TIC)</td> <td>0.00</td> <td>0.24</td> <td>0.71</td> <td>0.13</td> <td>2.44</td> <td>4.71</td> <td>2.78</td> <td>4.34</td> <td>3.11</td> <td>3.75</td> <td>4.35</td> <td>2.31</td> <td>12.07</td> <td>2.35</td> <td>4.62</td> <td>2.21</td> <td>2.32</td> <td>2.70</td> <td>2.18</td> <td>25.23</td> <td>4.68</td> <td>3.13</td> <td>3.49</td> <td>3.40</td> <td>2.74</td> </tr> <tr> <td>Rel. Inten.(% of BP)</td> <td>0.02</td> <td>0.95</td> <td>2.81</td> <td>0.53</td> <td>9.66</td> <td>18.68</td> <td>11.02</td> <td>17.20</td> <td>12.31</td> <td>14.88</td> <td>17.24</td> <td>9.15</td> <td>47.85</td> <td>9.33</td> <td>18.30</td> <td>8.77</td> <td>9.20</td> <td>10.68</td> <td>8.62</td> <td>100.00</td> <td>18.56</td> <td>12.41</td> <td>13.84</td> <td>13.46</td> <td>10.87</td> </tr> <tr> <td>Score</td> <td>0.20</td> <td>0.22</td> <td>1.00</td> <td>1.00</td> <td>-0.10</td> <td>0.75</td> <td>-0.11</td> <td>1.50</td> <td>-0.12</td> <td>1.50</td> <td>-0.17</td> <td>1.50</td> <td>15.4</td> <td>0.75</td> <td>-0.18</td> <td>-0.09</td> <td>0.75</td> <td>1.50</td> <td>0.50</td> <td>1.50</td> <td>1.50</td> <td>1.50</td> <td>1.50</td> <td>1.50</td> <td>1.50</td> </tr> <tr> <td>Ion-type</td> <td>PR</td> <td>LI</td> <td>a<sub>1</sub></td> <td>Y</td> <td></td> <td>b<sub>2</sub></td> <td></td> <td>y<sub>3</sub></td> <td></td> <td>y<sup>+2</sup></td> <td></td> <td>y<sup>+8</sup></td> <td>y<sub>15</sub><sup>+3</sup></td> <td>PEGSVE</td> <td></td> <td></td> <td>PEGSVEL</td> <td>y<sub>6</sub></td> <td>y<sub>15</sub>+H<sub>2</sub>O<sup>+2</sup></td> <td>y<sub>15</sub><sup>+2</sup></td> <td>y<sub>7</sub></td> <td>y<sub>16</sub><sup>+2</sup></td> <td>y<sub>17</sub><sup>+2</sup></td> <td>y<sub>8</sub></td> <td>y<sub>10</sub></td> </tr> <tr> <td>Delta ppm</td> <td>12.5</td> <td>13.6</td> <td></td> <td>-23.1</td> <td>-5.8</td> <td></td> <td>-19.3</td> <td></td> <td></td> <td>23.4</td> <td></td> <td>36.7</td> <td>15.4</td> <td>16.1</td> <td></td> <td></td> <td>2.7</td> <td>7.0</td> <td>-21.7</td> <td>-6.9</td> <td>-4.8</td> <td>34.3</td> <td>5.2</td> <td>-0.7</td> <td>13.3</td> </tr> </tbody> </table> |        |         |                |                  |                |                             |                                 |                            |                             |                       |                       |                 |                               |                                                            | Fragment-ion (m/z) | 70.066  | 86.098  | 120.079        | 136.075                                         | 199.177                       | 205.094        | 227.168                       | 347.204                       | 371.178        | 444.759 <sup>+2</sup> | 446.264 <sup>+2</sup> | 526.299 | 588.313 <sup>+3</sup> | 599.278 | 637.334 | 679.209 | 712.354 | 817.458 | 872.928 <sup>+2</sup> | 881.946 <sup>+2</sup> | 888.486 | 955.519 <sup>+2</sup> | 984.002 <sup>+2</sup> | 1051.552 | 1293.697 | Frac. Inten.(% of TIC) | 0.00 | 0.24 | 0.71 | 0.13 | 2.44 | 4.71 | 2.78 | 4.34 | 3.11 | 3.75 | 4.35 | 2.31 | 12.07 | 2.35 | 4.62 | 2.21 | 2.32 | 2.70 | 2.18 | 25.23 | 4.68 | 3.13 | 3.49 | 3.40 | 2.74 | Rel. Inten.(% of BP) | 0.02 | 0.95 | 2.81 | 0.53 | 9.66 | 18.68 | 11.02 | 17.20 | 12.31 | 14.88 | 17.24 | 9.15 | 47.85 | 9.33 | 18.30 | 8.77 | 9.20 | 10.68 | 8.62 | 100.00 | 18.56 | 12.41 | 13.84 | 13.46 | 10.87 | Score | 0.20 | 0.22 | 1.00 | 1.00 | -0.10 | 0.75 | -0.11 | 1.50 | -0.12 | 1.50 | -0.17 | 1.50 | 15.4 | 0.75 | -0.18 | -0.09 | 0.75 | 1.50 | 0.50 | 1.50 | 1.50 | 1.50 | 1.50 | 1.50 | 1.50 | Ion-type | PR | LI | a <sub>1</sub> | Y |  | b <sub>2</sub> |  | y <sub>3</sub> |  | y <sup>+2</sup> |  | y <sup>+8</sup> | y <sub>15</sub> <sup>+3</sup> | PEGSVE |  |  | PEGSVEL | y <sub>6</sub> | y <sub>15</sub> +H <sub>2</sub> O <sup>+2</sup> | y <sub>15</sub> <sup>+2</sup> | y <sub>7</sub> | y <sub>16</sub> <sup>+2</sup> | y <sub>17</sub> <sup>+2</sup> | y <sub>8</sub> | y <sub>10</sub> | Delta ppm | 12.5 | 13.6 |  | -23.1 | -5.8 |  | -19.3 |  |  | 23.4 |  | 36.7 | 15.4 | 16.1 |  |  | 2.7 | 7.0 | -21.7 | -6.9 | -4.8 | 34.3 | 5.2 | -0.7 | 13.3 |
| Fragment-ion (m/z)                                                                                                                                                                                                                                                                                                                                                                                                                                                                                                                                                                                                                                                                                                                                                                                                                                                                                                                                                                                                                                                                                                                                                                                                                                                                                                                                                                                                                                                                                                                                                                                                                                                                                                                                                                                                                                                                                                                                                                                                                                                                                                                                                                                                                                                                                                                                                                                                                                                                                                                                                                                                                                                                                                                                                                                                              | 70.066 | 86.098  | 120.079        | 136.075          | 199.177        | 205.094                     | 227.168                         | 347.204                    | 371.178                     | 444.759 <sup>+2</sup> | 446.264 <sup>+2</sup> | 526.299         | 588.313 <sup>+3</sup>         | 599.278                                                    | 637.334            | 679.209 | 712.354 | 817.458        | 872.928 <sup>+2</sup>                           | 881.946 <sup>+2</sup>         | 888.486        | 955.519 <sup>+2</sup>         | 984.002 <sup>+2</sup>         | 1051.552       | 1293.697              |                       |         |                       |         |         |         |         |         |                       |                       |         |                       |                       |          |          |                        |      |      |      |      |      |      |      |      |      |      |      |      |       |      |      |      |      |      |      |       |      |      |      |      |      |                      |      |      |      |      |      |       |       |       |       |       |       |      |       |      |       |      |      |       |      |        |       |       |       |       |       |       |      |      |      |      |       |      |       |      |       |      |       |      |      |      |       |       |      |      |      |      |      |      |      |      |      |          |    |    |                |   |  |                |  |                |  |                 |  |                 |                               |        |  |  |         |                |                                                 |                               |                |                               |                               |                |                 |           |      |      |  |       |      |  |       |  |  |      |  |      |      |      |  |  |     |     |       |      |      |      |     |      |      |
| Frac. Inten.(% of TIC)                                                                                                                                                                                                                                                                                                                                                                                                                                                                                                                                                                                                                                                                                                                                                                                                                                                                                                                                                                                                                                                                                                                                                                                                                                                                                                                                                                                                                                                                                                                                                                                                                                                                                                                                                                                                                                                                                                                                                                                                                                                                                                                                                                                                                                                                                                                                                                                                                                                                                                                                                                                                                                                                                                                                                                                                          | 0.00   | 0.24    | 0.71           | 0.13             | 2.44           | 4.71                        | 2.78                            | 4.34                       | 3.11                        | 3.75                  | 4.35                  | 2.31            | 12.07                         | 2.35                                                       | 4.62               | 2.21    | 2.32    | 2.70           | 2.18                                            | 25.23                         | 4.68           | 3.13                          | 3.49                          | 3.40           | 2.74                  |                       |         |                       |         |         |         |         |         |                       |                       |         |                       |                       |          |          |                        |      |      |      |      |      |      |      |      |      |      |      |      |       |      |      |      |      |      |      |       |      |      |      |      |      |                      |      |      |      |      |      |       |       |       |       |       |       |      |       |      |       |      |      |       |      |        |       |       |       |       |       |       |      |      |      |      |       |      |       |      |       |      |       |      |      |      |       |       |      |      |      |      |      |      |      |      |      |          |    |    |                |   |  |                |  |                |  |                 |  |                 |                               |        |  |  |         |                |                                                 |                               |                |                               |                               |                |                 |           |      |      |  |       |      |  |       |  |  |      |  |      |      |      |  |  |     |     |       |      |      |      |     |      |      |
| Rel. Inten.(% of BP)                                                                                                                                                                                                                                                                                                                                                                                                                                                                                                                                                                                                                                                                                                                                                                                                                                                                                                                                                                                                                                                                                                                                                                                                                                                                                                                                                                                                                                                                                                                                                                                                                                                                                                                                                                                                                                                                                                                                                                                                                                                                                                                                                                                                                                                                                                                                                                                                                                                                                                                                                                                                                                                                                                                                                                                                            | 0.02   | 0.95    | 2.81           | 0.53             | 9.66           | 18.68                       | 11.02                           | 17.20                      | 12.31                       | 14.88                 | 17.24                 | 9.15            | 47.85                         | 9.33                                                       | 18.30              | 8.77    | 9.20    | 10.68          | 8.62                                            | 100.00                        | 18.56          | 12.41                         | 13.84                         | 13.46          | 10.87                 |                       |         |                       |         |         |         |         |         |                       |                       |         |                       |                       |          |          |                        |      |      |      |      |      |      |      |      |      |      |      |      |       |      |      |      |      |      |      |       |      |      |      |      |      |                      |      |      |      |      |      |       |       |       |       |       |       |      |       |      |       |      |      |       |      |        |       |       |       |       |       |       |      |      |      |      |       |      |       |      |       |      |       |      |      |      |       |       |      |      |      |      |      |      |      |      |      |          |    |    |                |   |  |                |  |                |  |                 |  |                 |                               |        |  |  |         |                |                                                 |                               |                |                               |                               |                |                 |           |      |      |  |       |      |  |       |  |  |      |  |      |      |      |  |  |     |     |       |      |      |      |     |      |      |
| Score                                                                                                                                                                                                                                                                                                                                                                                                                                                                                                                                                                                                                                                                                                                                                                                                                                                                                                                                                                                                                                                                                                                                                                                                                                                                                                                                                                                                                                                                                                                                                                                                                                                                                                                                                                                                                                                                                                                                                                                                                                                                                                                                                                                                                                                                                                                                                                                                                                                                                                                                                                                                                                                                                                                                                                                                                           | 0.20   | 0.22    | 1.00           | 1.00             | -0.10          | 0.75                        | -0.11                           | 1.50                       | -0.12                       | 1.50                  | -0.17                 | 1.50            | 15.4                          | 0.75                                                       | -0.18              | -0.09   | 0.75    | 1.50           | 0.50                                            | 1.50                          | 1.50           | 1.50                          | 1.50                          | 1.50           | 1.50                  |                       |         |                       |         |         |         |         |         |                       |                       |         |                       |                       |          |          |                        |      |      |      |      |      |      |      |      |      |      |      |      |       |      |      |      |      |      |      |       |      |      |      |      |      |                      |      |      |      |      |      |       |       |       |       |       |       |      |       |      |       |      |      |       |      |        |       |       |       |       |       |       |      |      |      |      |       |      |       |      |       |      |       |      |      |      |       |       |      |      |      |      |      |      |      |      |      |          |    |    |                |   |  |                |  |                |  |                 |  |                 |                               |        |  |  |         |                |                                                 |                               |                |                               |                               |                |                 |           |      |      |  |       |      |  |       |  |  |      |  |      |      |      |  |  |     |     |       |      |      |      |     |      |      |
| Ion-type                                                                                                                                                                                                                                                                                                                                                                                                                                                                                                                                                                                                                                                                                                                                                                                                                                                                                                                                                                                                                                                                                                                                                                                                                                                                                                                                                                                                                                                                                                                                                                                                                                                                                                                                                                                                                                                                                                                                                                                                                                                                                                                                                                                                                                                                                                                                                                                                                                                                                                                                                                                                                                                                                                                                                                                                                        | PR     | LI      | a <sub>1</sub> | Y                |                | b <sub>2</sub>              |                                 | y <sub>3</sub>             |                             | y <sup>+2</sup>       |                       | y <sup>+8</sup> | y <sub>15</sub> <sup>+3</sup> | PEGSVE                                                     |                    |         | PEGSVEL | y <sub>6</sub> | y <sub>15</sub> +H <sub>2</sub> O <sup>+2</sup> | y <sub>15</sub> <sup>+2</sup> | y <sub>7</sub> | y <sub>16</sub> <sup>+2</sup> | y <sub>17</sub> <sup>+2</sup> | y <sub>8</sub> | y <sub>10</sub>       |                       |         |                       |         |         |         |         |         |                       |                       |         |                       |                       |          |          |                        |      |      |      |      |      |      |      |      |      |      |      |      |       |      |      |      |      |      |      |       |      |      |      |      |      |                      |      |      |      |      |      |       |       |       |       |       |       |      |       |      |       |      |      |       |      |        |       |       |       |       |       |       |      |      |      |      |       |      |       |      |       |      |       |      |      |      |       |       |      |      |      |      |      |      |      |      |      |          |    |    |                |   |  |                |  |                |  |                 |  |                 |                               |        |  |  |         |                |                                                 |                               |                |                               |                               |                |                 |           |      |      |  |       |      |  |       |  |  |      |  |      |      |      |  |  |     |     |       |      |      |      |     |      |      |
| Delta ppm                                                                                                                                                                                                                                                                                                                                                                                                                                                                                                                                                                                                                                                                                                                                                                                                                                                                                                                                                                                                                                                                                                                                                                                                                                                                                                                                                                                                                                                                                                                                                                                                                                                                                                                                                                                                                                                                                                                                                                                                                                                                                                                                                                                                                                                                                                                                                                                                                                                                                                                                                                                                                                                                                                                                                                                                                       | 12.5   | 13.6    |                | -23.1            | -5.8           |                             | -19.3                           |                            |                             | 23.4                  |                       | 36.7            | 15.4                          | 16.1                                                       |                    |         | 2.7     | 7.0            | -21.7                                           | -6.9                          | -4.8           | 34.3                          | 5.2                           | -0.7           | 13.3                  |                       |         |                       |         |         |         |         |         |                       |                       |         |                       |                       |          |          |                        |      |      |      |      |      |      |      |      |      |      |      |      |       |      |      |      |      |      |      |       |      |      |      |      |      |                      |      |      |      |      |      |       |       |       |       |       |       |      |       |      |       |      |      |       |      |        |       |       |       |       |       |       |      |      |      |      |       |      |       |      |       |      |       |      |      |      |       |       |      |      |      |      |      |      |      |      |      |          |    |    |                |   |  |                |  |                |  |                 |  |                 |                               |        |  |  |         |                |                                                 |                               |                |                               |                               |                |                 |           |      |      |  |       |      |  |       |  |  |      |  |      |      |      |  |  |     |     |       |      |      |      |     |      |      |

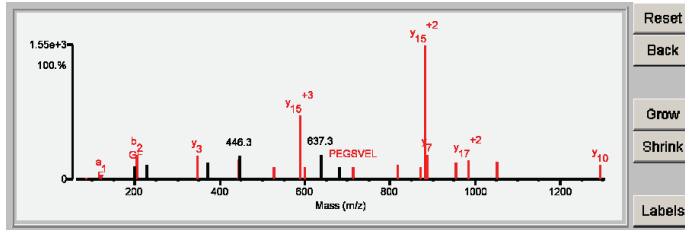

Result Summary

| Rank | Score | SPI (%) | BCS | # Unmatched Ions | Variable sites | Sequence                              | MH <sup>+</sup> Calculated (Da) | MH <sup>+</sup> Error (Da) | MH <sup>+</sup> Error (ppm) | Protein MW/pi (Da) | Species | Accession # | Protein Name                                               |
|------|-------|---------|-----|------------------|----------------|---------------------------------------|---------------------------------|----------------------------|-----------------------------|--------------------|---------|-------------|------------------------------------------------------------|
| 1    | 10.37 | 60.6    | 7   | 10/25            | K142k          | (R)TLTAVHDAIEDLVF/R/S E I V G K/R (I) | 2523.3817                       | 114.0229                   | -7.6                        | 22127.0/10.09      | HUMAN   | P62081      | 40S ribosomal protein S7 OS=Homo sapiens GN=RPS7 PE=1 SV=1 |

Detailed Results

| Rank | Score | SPI (%) | BCS | # Unmatched Ions | Variable sites | Sequence                                                      | MH <sup>+</sup> Calculated (Da) | MH <sup>+</sup> Error (Da) | MH <sup>+</sup> Error (ppm) | Protein MW/pi (Da) | Species | Accession # | MS-Digest Index # | Protein Name                                               |
|------|-------|---------|-----|------------------|----------------|---------------------------------------------------------------|---------------------------------|----------------------------|-----------------------------|--------------------|---------|-------------|-------------------|------------------------------------------------------------|
| 1    | 10.37 | 60.6    | 7   | 10/25            | K142k          | (R) T L T A V H D A I L E D L V F / R / S E I V G K / R ( I ) | 2523.3817                       | 114.0229                   | -7.6                        | 22127.0/10.09      | HUMAN   | P62081      | 690005            | 40S ribosomal protein S7 OS=Homo sapiens GN=RPS7 PE=1 SV=1 |

  

| Fragment-ion (m/z)      | 70.064 | 72.081 | 84.042 | 84.078 | 86.095 | 86.133 | 101.070 | 110.070 | 120.077 | 175.116 | 187.142 | 215.129 | 227.066 | 396.197 | 500.278 <sup>+2</sup> | 533.263 | 573.336 <sup>+2</sup> | 686.425 <sup>+2</sup> | 711.930 | 809.443 | 902.495 | 922.490 | 999.548 | 1146.619 | 1279.652 |
|-------------------------|--------|--------|--------|--------|--------|--------|---------|---------|---------|---------|---------|---------|---------|---------|-----------------------|---------|-----------------------|-----------------------|---------|---------|---------|---------|---------|----------|----------|
| Frac. Inten. (% of TIC) | 0.01   | 0.15   | 0.12   | 3.21   | 0.61   | 3.28   | 2.94    | 0.17    | 0.20    | 6.61    | 11.43   | 3.70    | 4.07    | 2.87    | 11.93                 | 3.16    | 10.33                 | 3.20                  | 2.68    | 3.21    | 6.69    | 5.20    | 7.09    | 4.53     | 2.63     |
| Rel. Inten. (% of BP)   | 0.04   | 1.24   | 1.01   | 26.89  | 5.13   | 27.46  | 24.66   | 1.41    | 1.66    | 55.42   | 95.84   | 31.01   | 34.14   | 24.04   | 100.00                | 26.49   | 86.63                 | 26.80                 | 22.44   | 26.89   | 56.08   | 43.59   | 59.42   | 37.95    | 22.04    |
| Score                   | 0.20   | 0.50   | 1.00   | -0.27  | 0.22   | -0.27  | -0.25   | 1.00    | 1.00    | 1.50    | 0.50    | -0.31   | -0.34   | -0.24   | 1.50                  | -0.26   | -0.87                 | -0.27                 | -0.22   | 0.50    | 1.50    | 1.50    | 1.50    | 0.50     |          |
| Ion-type                | PR     | V      | b1-H2O |        | LI     |        | H       | F       | y1      | a2      |         |         |         |         | y6 <sup>+2</sup>      |         |                       |                       |         | bs      | y7      | b9      | y8      | b11-H2O  | b12      |
| Delta ppm               | -23.2  | -3.8   | -42.7  |        | -17.7  |        | -15.2   | -28.9   | -19.1   | -19.2   |         |         |         |         | -10.3                 |         |                       |                       |         | 32.8    | -11.6   | -11.1   | -9.8    | 2.1      | -1.5     |

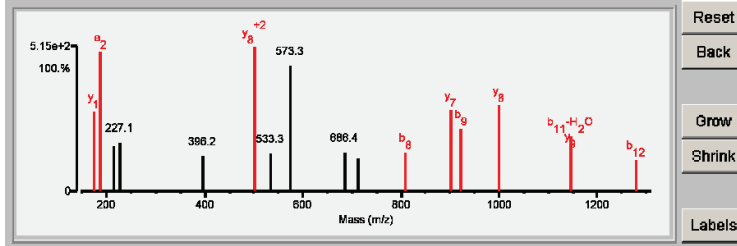

Result Summary

| Rank | Score | SPI (%) | BCS | # Unmatched Ions | Variable sites | Sequence              | MH <sup>+</sup> Calculated (Da) | MH <sup>+</sup> Error (Da) | MH <sup>+</sup> Error (ppm) | Protein MW/pl (Da) | Species | Accession # | Protein Name                                               |
|------|-------|---------|-----|------------------|----------------|-----------------------|---------------------------------|----------------------------|-----------------------------|--------------------|---------|-------------|------------------------------------------------------------|
| 1    | 16.64 | 76.5    | 9   | 6/25             | K49k           | (R)ELNITAAKIEVGGGR(K) | 1656.8915                       | 114.0555                   | 7.1                         | 22127.0/10.09      | HUMAN   | P62081      | 40S ribosomal protein S7 OS=Homo sapiens GN=RPS7 PE=1 SV=1 |

Detailed Results

| Rank | Score | SPI (%) | BCS | # Unmatched Ions | Variable sites | Sequence              | MH <sup>+</sup> Calculated (Da) | MH <sup>+</sup> Error (Da) | MH <sup>+</sup> Error (ppm) | Protein MW/pl (Da) | Species | Accession # | MS-Digest Index # | Protein Name                                               |
|------|-------|---------|-----|------------------|----------------|-----------------------|---------------------------------|----------------------------|-----------------------------|--------------------|---------|-------------|-------------------|------------------------------------------------------------|
| 1    | 16.64 | 76.5    | 9   | 6/25             | K49k           | (R)ELNITAAKIEVGGGR(K) | 1656.8915                       | 114.0555                   | 7.1                         | 22127.0/10.09      | HUMAN   | P62081      | 690005            | 40S ribosomal protein S7 OS=Homo sapiens GN=RPS7 PE=1 SV=1 |

  

| Fragment-ion (m/z)     | 72.078 | 84.081 | 86.096 | 136.073 | 175.114 | 197.131             | 215.139                          | 225.122 | 228.130                          | 339.166 | 346.185        | 357.172 | 372.172 | 445.252 | 451.255          | 485.262           | 529.786 <sup>+2</sup> | 555.285           | 574.301 | 606.310 | 623.320 | 651.352 <sup>+2</sup> | 687.378 | 707.877 <sup>+2</sup> | 816.429 |
|------------------------|--------|--------|--------|---------|---------|---------------------|----------------------------------|---------|----------------------------------|---------|----------------|---------|---------|---------|------------------|-------------------|-----------------------|-------------------|---------|---------|---------|-----------------------|---------|-----------------------|---------|
| Frac. Inten.(% of TIC) | 0.07   | 9.16   | 0.41   | 3.69    | 2.15    | 2.97                | 7.49                             | 3.34    | 2.45                             | 5.55    | 11.29          | 2.26    | 2.19    | 5.09    | 2.30             | 2.86              | 3.49                  | 3.21              | 7.92    | 2.09    | 3.03    | 5.27                  | 5.80    | 2.09                  | 3.84    |
| Rel. Inten.(% of BP)   | 0.65   | 81.10  | 3.66   | 32.66   | 19.06   | 26.33               | 66.32                            | 29.58   | 21.67                            | 49.14   | 100.00         | 19.99   | 19.40   | 45.07   | 20.35            | 25.30             | 30.86                 | 28.39             | 70.10   | 18.54   | 26.79   | 46.68                 | 51.32   | 18.47                 | 33.96   |
| Score                  | 0.50   | -0.81  | 0.22   | -0.33   | 1.50    | 0.50                | 0.75                             | 0.25    | 0.75                             | 0.25    | 1.50           | 0.50    | 0.75    | 1.50    | -0.20            | 0.75              | 1.50                  | -0.28             | 1.50    | -0.19   | -0.27   | 1.50                  | 1.50    | 1.50                  | 1.50    |
| Ion-type               | V      |        | LI     |         | Y1      | IT-H <sub>2</sub> O | b <sub>2</sub> -H <sub>2</sub> O | NI      | b <sub>3</sub> -H <sub>2</sub> O | Y4      | b <sub>3</sub> | EIE     | Y5      | Y6      | Y9 <sup>+2</sup> | Y12 <sup>+2</sup> | Y7                    | Y13 <sup>+2</sup> | Y8      |         |         |                       |         |                       |         |
| Delta ppm              | -37.1  |        | -9.6   |         | -26.6   | 6.3                 | -8.6                             | -12.3   | -24.8                            | -4.7    | 4.2            | -15.6   | -15.6   | 0.5     |                  | -21.5             | 6.3                   |                   | 10.9    |         |         |                       |         |                       |         |

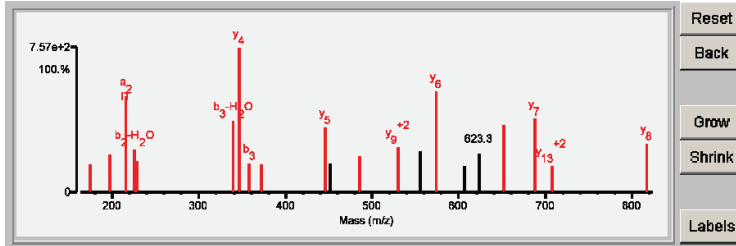

Result Summary

| Rank | Score | SPI (%) | BCS | # Unmatched ions | Variable sites | Sequence             | MH <sup>+</sup> Calculated (Da) | MH <sup>+</sup> Error (Da) | MH <sup>+</sup> Error (ppm) | Protein MW/pi (Da) | Species | Accession # | Protein Name                                                       |
|------|-------|---------|-----|------------------|----------------|----------------------|---------------------------------|----------------------------|-----------------------------|--------------------|---------|-------------|--------------------------------------------------------------------|
| 1    | 18.77 | 93.2    | 10  | 2/25             | K128k          | (K)GAKLTPEEEIILNK(K) | 1570.8323                       | 114.0580                   | 8.9                         | 24205.3/10.32      | HUMAN   | P62241      | 40S ribosomal protein S8 OS=Homo sapiens GN=RPS8 PE=1 SV=2         |
| 2    | 6.77  | 63.2    | 1   | 8/25             | K81k           | (K)NLIEEEPTLkAGK(K)  | 1570.8323                       | 114.0580                   | 8.9                         | 24205.3/10.32      | HUMAN   | RP62241     | REVERSE 40S ribosomal protein S8 OS=Homo sapiens GN=RPS8 PE=1 SV=2 |

Detailed Results

| Rank                                                                                                                                                                                                                                                                                                                                                                                                                                                                                                                                                                                                                                                                                                                                                                                                                                                                                                                                                                                                                                                                                                                                                                                                                                                                                                                                                                                                                                                                                                                                                                                                                                                                                                                                                                                                                                                                                                                                                                                                                                                                                                                                                                                                                                                                                                                                                                                                                                                                                                         | Score  | SPI (%) | BCS    | # Unmatched ions | Variable sites | Sequence                                       | MH <sup>+</sup> Calculated (Da) | MH <sup>+</sup> Error (Da) | MH <sup>+</sup> Error (ppm) | Protein MW/pi (Da) | Species | Accession # | MS-Digest Index # | Protein Name                                               |                    |         |         |         |         |         |         |         |         |         |         |         |         |         |         |         |         |         |         |         |         |         |         |         |         |         |                         |      |      |      |      |      |      |      |      |      |      |      |      |      |      |      |      |      |      |      |      |      |      |      |      |      |                       |      |       |      |       |      |      |       |       |       |       |       |       |       |       |       |       |       |       |       |       |        |       |       |       |       |       |      |      |      |       |      |      |      |      |      |      |      |      |      |       |      |      |      |      |      |      |      |      |      |      |      |          |    |    |    |  |   |     |        |    |    |    |        |    |    |  |     |    |    |     |    |    |    |    |        |    |    |           |     |       |     |  |     |      |      |       |     |     |     |     |      |  |      |      |      |       |      |      |     |     |      |     |      |
|--------------------------------------------------------------------------------------------------------------------------------------------------------------------------------------------------------------------------------------------------------------------------------------------------------------------------------------------------------------------------------------------------------------------------------------------------------------------------------------------------------------------------------------------------------------------------------------------------------------------------------------------------------------------------------------------------------------------------------------------------------------------------------------------------------------------------------------------------------------------------------------------------------------------------------------------------------------------------------------------------------------------------------------------------------------------------------------------------------------------------------------------------------------------------------------------------------------------------------------------------------------------------------------------------------------------------------------------------------------------------------------------------------------------------------------------------------------------------------------------------------------------------------------------------------------------------------------------------------------------------------------------------------------------------------------------------------------------------------------------------------------------------------------------------------------------------------------------------------------------------------------------------------------------------------------------------------------------------------------------------------------------------------------------------------------------------------------------------------------------------------------------------------------------------------------------------------------------------------------------------------------------------------------------------------------------------------------------------------------------------------------------------------------------------------------------------------------------------------------------------------------|--------|---------|--------|------------------|----------------|------------------------------------------------|---------------------------------|----------------------------|-----------------------------|--------------------|---------|-------------|-------------------|------------------------------------------------------------|--------------------|---------|---------|---------|---------|---------|---------|---------|---------|---------|---------|---------|---------|---------|---------|---------|---------|---------|---------|---------|---------|---------|---------|---------|---------|---------|-------------------------|------|------|------|------|------|------|------|------|------|------|------|------|------|------|------|------|------|------|------|------|------|------|------|------|------|-----------------------|------|-------|------|-------|------|------|-------|-------|-------|-------|-------|-------|-------|-------|-------|-------|-------|-------|-------|-------|--------|-------|-------|-------|-------|-------|------|------|------|-------|------|------|------|------|------|------|------|------|------|-------|------|------|------|------|------|------|------|------|------|------|------|----------|----|----|----|--|---|-----|--------|----|----|----|--------|----|----|--|-----|----|----|-----|----|----|----|----|--------|----|----|-----------|-----|-------|-----|--|-----|------|------|-------|-----|-----|-----|-----|------|--|------|------|------|-------|------|------|-----|-----|------|-----|------|
| 1                                                                                                                                                                                                                                                                                                                                                                                                                                                                                                                                                                                                                                                                                                                                                                                                                                                                                                                                                                                                                                                                                                                                                                                                                                                                                                                                                                                                                                                                                                                                                                                                                                                                                                                                                                                                                                                                                                                                                                                                                                                                                                                                                                                                                                                                                                                                                                                                                                                                                                            | 18.77  | 93.2    | 10     | 2/25             | K128k          | (K)G A k L V T P E / E / E / E / L / N / K (K) | 1570.8323                       | 114.0580                   | 8.9                         | 24205.3/10.32      | HUMAN   | P62241      | 691655            | 40S ribosomal protein S8 OS=Homo sapiens GN=RPS8 PE=1 SV=2 |                    |         |         |         |         |         |         |         |         |         |         |         |         |         |         |         |         |         |         |         |         |         |         |         |         |         |                         |      |      |      |      |      |      |      |      |      |      |      |      |      |      |      |      |      |      |      |      |      |      |      |      |      |                       |      |       |      |       |      |      |       |       |       |       |       |       |       |       |       |       |       |       |       |       |        |       |       |       |       |       |      |      |      |       |      |      |      |      |      |      |      |      |      |       |      |      |      |      |      |      |      |      |      |      |      |          |    |    |    |  |   |     |        |    |    |    |        |    |    |  |     |    |    |     |    |    |    |    |        |    |    |           |     |       |     |  |     |      |      |       |     |     |     |     |      |  |      |      |      |       |      |      |     |     |      |     |      |
| <table border="1"> <thead> <tr> <th>Fragment-ion (m/z)</th> <th>70.066</th> <th>84.080</th> <th>86.097</th> <th>101.067</th> <th>102.056</th> <th>129.101</th> <th>130.085</th> <th>147.111</th> <th>199.110</th> <th>227.105</th> <th>241.085</th> <th>259.094</th> <th>261.155</th> <th>328.231</th> <th>356.143</th> <th>371.202</th> <th>374.244</th> <th>457.271</th> <th>484.285</th> <th>487.334</th> <th>585.342</th> <th>616.368</th> <th>727.338</th> <th>745.413</th> <th>874.444</th> </tr> </thead> <tbody> <tr> <td>Frac. Inten. (% of TIC)</td> <td>0.01</td> <td>0.86</td> <td>0.50</td> <td>3.37</td> <td>0.21</td> <td>0.22</td> <td>3.57</td> <td>3.90</td> <td>4.49</td> <td>6.69</td> <td>4.11</td> <td>3.68</td> <td>6.85</td> <td>3.44</td> <td>6.80</td> <td>8.00</td> <td>4.13</td> <td>4.99</td> <td>3.78</td> <td>4.24</td> <td>8.01</td> <td>4.71</td> <td>3.34</td> <td>3.83</td> <td>6.26</td> </tr> <tr> <td>Rel. Inten. (% of BP)</td> <td>0.18</td> <td>10.74</td> <td>6.27</td> <td>42.10</td> <td>2.66</td> <td>2.72</td> <td>44.58</td> <td>48.75</td> <td>56.03</td> <td>83.50</td> <td>51.31</td> <td>45.98</td> <td>85.48</td> <td>42.98</td> <td>84.88</td> <td>99.94</td> <td>51.57</td> <td>62.33</td> <td>47.16</td> <td>52.95</td> <td>100.00</td> <td>58.77</td> <td>41.76</td> <td>47.82</td> <td>78.13</td> </tr> <tr> <td>Score</td> <td>0.20</td> <td>0.50</td> <td>0.22</td> <td>-0.42</td> <td>1.00</td> <td>0.20</td> <td>0.50</td> <td>1.50</td> <td>0.75</td> <td>0.75</td> <td>0.50</td> <td>0.75</td> <td>1.50</td> <td>-0.43</td> <td>0.75</td> <td>0.50</td> <td>1.50</td> <td>0.75</td> <td>0.50</td> <td>1.50</td> <td>0.50</td> <td>1.50</td> <td>0.75</td> <td>1.50</td> <td>1.50</td> </tr> <tr> <td>Ion-type</td> <td>PR</td> <td>KQ</td> <td>LI</td> <td></td> <td>E</td> <td>RKQ</td> <td>y1-NH3</td> <td>y1</td> <td>TP</td> <td>PE</td> <td>EE-H2O</td> <td>EE</td> <td>y2</td> <td></td> <td>PEE</td> <td>b3</td> <td>y3</td> <td>kLT</td> <td>b4</td> <td>y4</td> <td>b5</td> <td>y5</td> <td>PEEEEE</td> <td>y6</td> <td>y7</td> </tr> <tr> <td>Delta ppm</td> <td>8.2</td> <td>-12.8</td> <td>0.9</td> <td></td> <td>6.3</td> <td>-8.1</td> <td>-8.9</td> <td>-12.9</td> <td>5.4</td> <td>3.4</td> <td>8.7</td> <td>2.9</td> <td>-1.7</td> <td></td> <td>-8.8</td> <td>-7.4</td> <td>10.4</td> <td>-16.2</td> <td>-8.9</td> <td>20.8</td> <td>9.3</td> <td>2.7</td> <td>31.5</td> <td>5.6</td> <td>-8.4</td> </tr> </tbody> </table> |        |         |        |                  |                |                                                |                                 |                            |                             |                    |         |             |                   |                                                            | Fragment-ion (m/z) | 70.066  | 84.080  | 86.097  | 101.067 | 102.056 | 129.101 | 130.085 | 147.111 | 199.110 | 227.105 | 241.085 | 259.094 | 261.155 | 328.231 | 356.143 | 371.202 | 374.244 | 457.271 | 484.285 | 487.334 | 585.342 | 616.368 | 727.338 | 745.413 | 874.444 | Frac. Inten. (% of TIC) | 0.01 | 0.86 | 0.50 | 3.37 | 0.21 | 0.22 | 3.57 | 3.90 | 4.49 | 6.69 | 4.11 | 3.68 | 6.85 | 3.44 | 6.80 | 8.00 | 4.13 | 4.99 | 3.78 | 4.24 | 8.01 | 4.71 | 3.34 | 3.83 | 6.26 | Rel. Inten. (% of BP) | 0.18 | 10.74 | 6.27 | 42.10 | 2.66 | 2.72 | 44.58 | 48.75 | 56.03 | 83.50 | 51.31 | 45.98 | 85.48 | 42.98 | 84.88 | 99.94 | 51.57 | 62.33 | 47.16 | 52.95 | 100.00 | 58.77 | 41.76 | 47.82 | 78.13 | Score | 0.20 | 0.50 | 0.22 | -0.42 | 1.00 | 0.20 | 0.50 | 1.50 | 0.75 | 0.75 | 0.50 | 0.75 | 1.50 | -0.43 | 0.75 | 0.50 | 1.50 | 0.75 | 0.50 | 1.50 | 0.50 | 1.50 | 0.75 | 1.50 | 1.50 | Ion-type | PR | KQ | LI |  | E | RKQ | y1-NH3 | y1 | TP | PE | EE-H2O | EE | y2 |  | PEE | b3 | y3 | kLT | b4 | y4 | b5 | y5 | PEEEEE | y6 | y7 | Delta ppm | 8.2 | -12.8 | 0.9 |  | 6.3 | -8.1 | -8.9 | -12.9 | 5.4 | 3.4 | 8.7 | 2.9 | -1.7 |  | -8.8 | -7.4 | 10.4 | -16.2 | -8.9 | 20.8 | 9.3 | 2.7 | 31.5 | 5.6 | -8.4 |
| Fragment-ion (m/z)                                                                                                                                                                                                                                                                                                                                                                                                                                                                                                                                                                                                                                                                                                                                                                                                                                                                                                                                                                                                                                                                                                                                                                                                                                                                                                                                                                                                                                                                                                                                                                                                                                                                                                                                                                                                                                                                                                                                                                                                                                                                                                                                                                                                                                                                                                                                                                                                                                                                                           | 70.066 | 84.080  | 86.097 | 101.067          | 102.056        | 129.101                                        | 130.085                         | 147.111                    | 199.110                     | 227.105            | 241.085 | 259.094     | 261.155           | 328.231                                                    | 356.143            | 371.202 | 374.244 | 457.271 | 484.285 | 487.334 | 585.342 | 616.368 | 727.338 | 745.413 | 874.444 |         |         |         |         |         |         |         |         |         |         |         |         |         |         |         |                         |      |      |      |      |      |      |      |      |      |      |      |      |      |      |      |      |      |      |      |      |      |      |      |      |      |                       |      |       |      |       |      |      |       |       |       |       |       |       |       |       |       |       |       |       |       |       |        |       |       |       |       |       |      |      |      |       |      |      |      |      |      |      |      |      |      |       |      |      |      |      |      |      |      |      |      |      |      |          |    |    |    |  |   |     |        |    |    |    |        |    |    |  |     |    |    |     |    |    |    |    |        |    |    |           |     |       |     |  |     |      |      |       |     |     |     |     |      |  |      |      |      |       |      |      |     |     |      |     |      |
| Frac. Inten. (% of TIC)                                                                                                                                                                                                                                                                                                                                                                                                                                                                                                                                                                                                                                                                                                                                                                                                                                                                                                                                                                                                                                                                                                                                                                                                                                                                                                                                                                                                                                                                                                                                                                                                                                                                                                                                                                                                                                                                                                                                                                                                                                                                                                                                                                                                                                                                                                                                                                                                                                                                                      | 0.01   | 0.86    | 0.50   | 3.37             | 0.21           | 0.22                                           | 3.57                            | 3.90                       | 4.49                        | 6.69               | 4.11    | 3.68        | 6.85              | 3.44                                                       | 6.80               | 8.00    | 4.13    | 4.99    | 3.78    | 4.24    | 8.01    | 4.71    | 3.34    | 3.83    | 6.26    |         |         |         |         |         |         |         |         |         |         |         |         |         |         |         |                         |      |      |      |      |      |      |      |      |      |      |      |      |      |      |      |      |      |      |      |      |      |      |      |      |      |                       |      |       |      |       |      |      |       |       |       |       |       |       |       |       |       |       |       |       |       |       |        |       |       |       |       |       |      |      |      |       |      |      |      |      |      |      |      |      |      |       |      |      |      |      |      |      |      |      |      |      |      |          |    |    |    |  |   |     |        |    |    |    |        |    |    |  |     |    |    |     |    |    |    |    |        |    |    |           |     |       |     |  |     |      |      |       |     |     |     |     |      |  |      |      |      |       |      |      |     |     |      |     |      |
| Rel. Inten. (% of BP)                                                                                                                                                                                                                                                                                                                                                                                                                                                                                                                                                                                                                                                                                                                                                                                                                                                                                                                                                                                                                                                                                                                                                                                                                                                                                                                                                                                                                                                                                                                                                                                                                                                                                                                                                                                                                                                                                                                                                                                                                                                                                                                                                                                                                                                                                                                                                                                                                                                                                        | 0.18   | 10.74   | 6.27   | 42.10            | 2.66           | 2.72                                           | 44.58                           | 48.75                      | 56.03                       | 83.50              | 51.31   | 45.98       | 85.48             | 42.98                                                      | 84.88              | 99.94   | 51.57   | 62.33   | 47.16   | 52.95   | 100.00  | 58.77   | 41.76   | 47.82   | 78.13   |         |         |         |         |         |         |         |         |         |         |         |         |         |         |         |                         |      |      |      |      |      |      |      |      |      |      |      |      |      |      |      |      |      |      |      |      |      |      |      |      |      |                       |      |       |      |       |      |      |       |       |       |       |       |       |       |       |       |       |       |       |       |       |        |       |       |       |       |       |      |      |      |       |      |      |      |      |      |      |      |      |      |       |      |      |      |      |      |      |      |      |      |      |      |          |    |    |    |  |   |     |        |    |    |    |        |    |    |  |     |    |    |     |    |    |    |    |        |    |    |           |     |       |     |  |     |      |      |       |     |     |     |     |      |  |      |      |      |       |      |      |     |     |      |     |      |
| Score                                                                                                                                                                                                                                                                                                                                                                                                                                                                                                                                                                                                                                                                                                                                                                                                                                                                                                                                                                                                                                                                                                                                                                                                                                                                                                                                                                                                                                                                                                                                                                                                                                                                                                                                                                                                                                                                                                                                                                                                                                                                                                                                                                                                                                                                                                                                                                                                                                                                                                        | 0.20   | 0.50    | 0.22   | -0.42            | 1.00           | 0.20                                           | 0.50                            | 1.50                       | 0.75                        | 0.75               | 0.50    | 0.75        | 1.50              | -0.43                                                      | 0.75               | 0.50    | 1.50    | 0.75    | 0.50    | 1.50    | 0.50    | 1.50    | 0.75    | 1.50    | 1.50    |         |         |         |         |         |         |         |         |         |         |         |         |         |         |         |                         |      |      |      |      |      |      |      |      |      |      |      |      |      |      |      |      |      |      |      |      |      |      |      |      |      |                       |      |       |      |       |      |      |       |       |       |       |       |       |       |       |       |       |       |       |       |       |        |       |       |       |       |       |      |      |      |       |      |      |      |      |      |      |      |      |      |       |      |      |      |      |      |      |      |      |      |      |      |          |    |    |    |  |   |     |        |    |    |    |        |    |    |  |     |    |    |     |    |    |    |    |        |    |    |           |     |       |     |  |     |      |      |       |     |     |     |     |      |  |      |      |      |       |      |      |     |     |      |     |      |
| Ion-type                                                                                                                                                                                                                                                                                                                                                                                                                                                                                                                                                                                                                                                                                                                                                                                                                                                                                                                                                                                                                                                                                                                                                                                                                                                                                                                                                                                                                                                                                                                                                                                                                                                                                                                                                                                                                                                                                                                                                                                                                                                                                                                                                                                                                                                                                                                                                                                                                                                                                                     | PR     | KQ      | LI     |                  | E              | RKQ                                            | y1-NH3                          | y1                         | TP                          | PE                 | EE-H2O  | EE          | y2                |                                                            | PEE                | b3      | y3      | kLT     | b4      | y4      | b5      | y5      | PEEEEE  | y6      | y7      |         |         |         |         |         |         |         |         |         |         |         |         |         |         |         |                         |      |      |      |      |      |      |      |      |      |      |      |      |      |      |      |      |      |      |      |      |      |      |      |      |      |                       |      |       |      |       |      |      |       |       |       |       |       |       |       |       |       |       |       |       |       |       |        |       |       |       |       |       |      |      |      |       |      |      |      |      |      |      |      |      |      |       |      |      |      |      |      |      |      |      |      |      |      |          |    |    |    |  |   |     |        |    |    |    |        |    |    |  |     |    |    |     |    |    |    |    |        |    |    |           |     |       |     |  |     |      |      |       |     |     |     |     |      |  |      |      |      |       |      |      |     |     |      |     |      |
| Delta ppm                                                                                                                                                                                                                                                                                                                                                                                                                                                                                                                                                                                                                                                                                                                                                                                                                                                                                                                                                                                                                                                                                                                                                                                                                                                                                                                                                                                                                                                                                                                                                                                                                                                                                                                                                                                                                                                                                                                                                                                                                                                                                                                                                                                                                                                                                                                                                                                                                                                                                                    | 8.2    | -12.8   | 0.9    |                  | 6.3            | -8.1                                           | -8.9                            | -12.9                      | 5.4                         | 3.4                | 8.7     | 2.9         | -1.7              |                                                            | -8.8               | -7.4    | 10.4    | -16.2   | -8.9    | 20.8    | 9.3     | 2.7     | 31.5    | 5.6     | -8.4    |         |         |         |         |         |         |         |         |         |         |         |         |         |         |         |                         |      |      |      |      |      |      |      |      |      |      |      |      |      |      |      |      |      |      |      |      |      |      |      |      |      |                       |      |       |      |       |      |      |       |       |       |       |       |       |       |       |       |       |       |       |       |       |        |       |       |       |       |       |      |      |      |       |      |      |      |      |      |      |      |      |      |       |      |      |      |      |      |      |      |      |      |      |      |          |    |    |    |  |   |     |        |    |    |    |        |    |    |  |     |    |    |     |    |    |    |    |        |    |    |           |     |       |     |  |     |      |      |       |     |     |     |     |      |  |      |      |      |       |      |      |     |     |      |     |      |

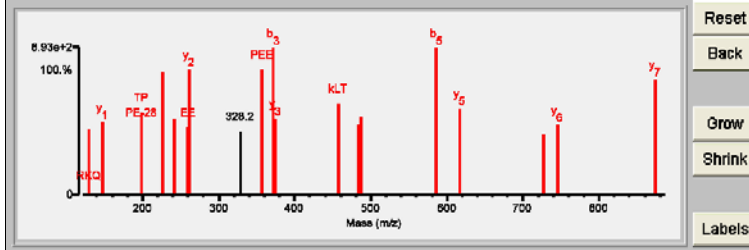

Result Summary

| Rank | Score | SPI (%) | BCS | # Unmatched Ions | Variable sites | Sequence                      | MH <sup>+</sup> Calculated (Da) | MH <sup>+</sup> Error (Da) | MH <sup>+</sup> Error (ppm) | Protein MW/pI (Da) | Species | Accession #            | Protein Name                                                                     |
|------|-------|---------|-----|------------------|----------------|-------------------------------|---------------------------------|----------------------------|-----------------------------|--------------------|---------|------------------------|----------------------------------------------------------------------------------|
| 1    | 11.43 | 71.9    | 3   | 10/25            | K344k K347k    | (R) <u>VLGFVkvakeQGAk</u> (V) | 1473.8788                       | 228.0951                   | 5.5                         | 53802.2/5.69       | HUMAN   | <a href="#">P49189</a> | 4-trimethylaminobutyraldehyde dehydrogenase OS=Homo sapiens GN=ALDH9A1 PE=1 SV=3 |
| 2    | 9.18  | 65.1    | 2   | 12/25            | K344k K352k    | (R) <u>VLGFVkvakeQGAk</u> (V) | 1473.8788                       | 228.0951                   | 5.5                         | 53802.2/5.69       | HUMAN   | <a href="#">P49189</a> | 4-trimethylaminobutyraldehyde dehydrogenase OS=Homo sapiens GN=ALDH9A1 PE=1 SV=3 |

Detailed Results

| Rank | Score | SPI (%) | BCS | # Unmatched Ions | Variable sites | Sequence                            | MH <sup>+</sup> Calculated (Da) | MH <sup>+</sup> Error (Da) | MH <sup>+</sup> Error (ppm) | Protein MW/pI (Da) | Species | Accession #            | MS-Digest Index #     | Protein Name                                                                     |
|------|-------|---------|-----|------------------|----------------|-------------------------------------|---------------------------------|----------------------------|-----------------------------|--------------------|---------|------------------------|-----------------------|----------------------------------------------------------------------------------|
| 1    | 11.43 | 71.9    | 3   | 10/25            | K344k K347k    | (R) V L G F V k v a k e Q G A k (V) | 1473.8788                       | 228.0951                   | 5.5                         | 53802.2/5.69       | HUMAN   | <a href="#">P49189</a> | <a href="#">18407</a> | 4-trimethylaminobutyraldehyde dehydrogenase OS=Homo sapiens GN=ALDH9A1 PE=1 SV=3 |

  

| Fragment-ion (m/z)      | 120.084 | 143.122 | 171.117 | 219.158 | 247.152 | 273.167 | 318.192 | 362.184 | 389.268 | 417.263 | 518.281 | 532.293 | 546.315 | 604.323 | 631.364 | 645.380 | 658.355 <sup>2</sup> | 675.359 | 774.427 | 928.542 | 1057.584 | 1170.681 | 1285.702 | 1315.685 | 1384.766 |
|-------------------------|---------|---------|---------|---------|---------|---------|---------|---------|---------|---------|---------|---------|---------|---------|---------|---------|----------------------|---------|---------|---------|----------|----------|----------|----------|----------|
| Frac. Inten. (% of TIC) | 0.19    | 1.94    | 2.97    | 2.49    | 1.59    | 2.23    | 9.36    | 4.01    | 1.77    | 2.24    | 1.62    | 3.03    | 1.88    | 1.62    | 2.02    | 3.03    | 2.02                 | 2.81    | 4.45    | 26.38   | 8.35     | 3.73     | 6.81     | 1.67     | 1.78     |
| Rel. Inten. (% of BP)   | 0.71    | 7.37    | 11.26   | 9.45    | 6.02    | 8.44    | 35.49   | 15.18   | 6.69    | 8.49    | 6.15    | 11.48   | 7.14    | 6.15    | 7.57    | 11.49   | 7.64                 | 10.65   | 16.88   | 100.00  | 31.65    | 14.16    | 25.82    | 6.34     | 6.75     |
| Score                   | 1.00    | 0.50    | 0.75    | 0.50    | 0.75    | -0.08   | 0.75    | -0.15   | 0.50    | 0.75    | -0.06   | 1.50    | 0.75    | -0.06   | -0.08   | 0.75    | -0.08                | -0.11   | 1.50    | 0.50    | -0.32    | 0.50     | 1.50     | -0.06    | -0.07    |
| Ion-type                | F       | VA-28   | VA      | FV-28   | FV      |         | LGF     |         | a4      | b4      |         | ys      | GFVkv   |         |         | GFVkv   |                      |         | ye      | b8      |          | b9       | y10      |          |          |
| Delta ppm               | 25.2    | 17.6    | 20.4    | 32.9    | 26.7    |         | 31.1    |         | LGFV-28 | 31.6    | LGFV    | 39.0    | 18.8    |         |         | 11.0    |                      | 20.9    | -22.0   |         | -16.9    | -15.8    |          |          |          |

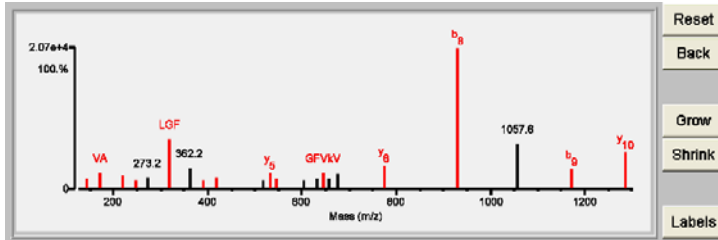



Result Summary

| Rank | Score | SPI (%) | BCS | # Unmatched Ions | # Variable sites | Sequence                  | MH <sup>+</sup> Calculated (Da) | MH <sup>+</sup> Error (Da) | MH <sup>+</sup> Error (ppm) | Protein MW/pl (Da) | Species | Accession #            | Protein Name                                                                |
|------|-------|---------|-----|------------------|------------------|---------------------------|---------------------------------|----------------------------|-----------------------------|--------------------|---------|------------------------|-----------------------------------------------------------------------------|
| 1    | 10.47 | 61.2    | 6   | 10/25            | K292k            | (R) <u>LkVGLQVAVK</u> (A) | 1153.7667                       | 114.0419                   | -0.8                        | 61055.0/5.70       | HUMAN   | <a href="#">P10809</a> | 60 kDa heat shock protein, mitochondrial OS=Homo sapiens GN=HSPD1 PE=1 SV=2 |

Detailed Results

| Rank | Score | SPI (%) | BCS | # Unmatched Ions | # Variable sites | Sequence                        | MH <sup>+</sup> Calculated (Da) | MH <sup>+</sup> Error (Da) | MH <sup>+</sup> Error (ppm) | Protein MW/pl (Da) | Species | Accession #            | MS-Digest Index #     | Protein Name                                                                |
|------|-------|---------|-----|------------------|------------------|---------------------------------|---------------------------------|----------------------------|-----------------------------|--------------------|---------|------------------------|-----------------------|-----------------------------------------------------------------------------|
| 1    | 10.47 | 61.2    | 6   | 10/25            | K292k            | (R) L k v G L Q V V A V V K (A) | 1153.7667                       | 114.0419                   | -0.8                        | 61055.0/5.70       | HUMAN   | <a href="#">P10809</a> | <a href="#">96413</a> | 60 kDa heat shock protein, mitochondrial OS=Homo sapiens GN=HSPD1 PE=1 SV=2 |

  

| Fragment-ion (m/z)      | 72.081 | 84.045 | 84.080 | 86.097         | 101.069 | 129.099 | 130.085                         | 143.117 | 147.111        | 170.058 | 171.136 | 199.146 | 246.179        | 270.178 | 271.159 | 310.165 | 313.204 | 317.213        | 327.194 | 381.209 | 416.284 | 427.284 | 512.315        | 515.355        | 624.416 |
|-------------------------|--------|--------|--------|----------------|---------|---------|---------------------------------|---------|----------------|---------|---------|---------|----------------|---------|---------|---------|---------|----------------|---------|---------|---------|---------|----------------|----------------|---------|
| Frac. Inten. (% of TIC) | 0.92   | 9.89   | 0.58   | 17.40          | 0.15    | 0.12    | 5.41                            | 3.55    | 8.03           | 3.00    | 2.53    | 3.65    | 6.52           | 3.19    | 2.50    | 3.71    | 3.19    | 2.67           | 2.47    | 3.35    | 4.43    | 2.44    | 2.44           | 3.26           | 4.59    |
| Rel. Inten. (% of BP)   | 5.31   | 56.86  | 3.34   | 100.00         | 0.84    | 0.69    | 31.09                           | 20.41   | 46.13          | 17.24   | 14.57   | 21.00   | 37.49          | 18.32   | 14.35   | 21.34   | 18.33   | 15.36          | 14.20   | 19.24   | 25.46   | 14.04   | 14.03          | 18.77          | 26.40   |
| Score                   | 0.50   | -0.57  | 0.50   | 0.50           |         | 0.20    | 0.50                            | -0.20   | 1.50           | -0.17   | -0.15   | 0.75    | 1.50           | 0.75    | -0.14   | -0.21   | -0.18   | 1.50           | 0.75    | -0.14   | -0.21   | -0.18   | 1.50           | 0.75           | -0.26   |
| Ion-type                | V      |        | KQ     | a <sub>1</sub> | KQ      | RKQ     | y <sub>1</sub> -NH <sub>3</sub> |         | y <sub>1</sub> |         |         | VV      | y <sub>2</sub> | VAV     |         |         |         | y <sub>3</sub> | QVV     |         |         |         | b <sub>4</sub> | y <sub>5</sub> |         |
| Delta ppm               | -2.4   |        | -4.5   | -8.4           | 0.50    | 4.3     | -22.0                           | -10.4   | -9.5           |         |         | 2.5     | -7.0           | -15.2   |         |         |         | -15.9          | -30.5   |         |         |         | -9.4           | -0.9           |         |

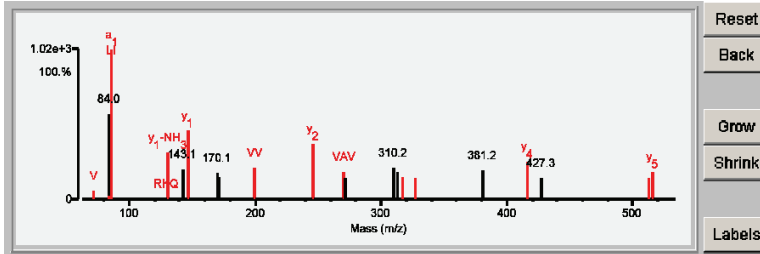

Result Summary

| Rank | Score | SPI (%) | BCS | # Unmatched Ions | Variable sites | Sequence               | MH <sup>+</sup> Calculated (Da) | MH <sup>+</sup> Error (Da) | MH <sup>+</sup> Error (ppm) | Protein MW/pi (Da) | Species | Accession # | Protein Name                                                              |
|------|-------|---------|-----|------------------|----------------|------------------------|---------------------------------|----------------------------|-----------------------------|--------------------|---------|-------------|---------------------------------------------------------------------------|
| 1    | 18.01 | 96.3    | 9   | 2/25             | K49k           | (K)AAGVNVPEFWPGLFAK(A) | 1702.8952                       | 114.0490                   | 3.3                         | 11514.0/4.26       | HUMAN   | P05386      | 60S acidic ribosomal protein P1 OS=Homo sapiens GN=RPLP1 PE=1 SV=1        |
| 2    | 6.21  | 59.9    | 3   | 13/25            | K3470k         | (R)JETLSPNNALFEKVK(V)  | 1702.9374                       | 114.0067                   | -19.9                       | 514666.7/5.95      | HUMAN   | RQ96JB1     | REVERSE Dynein heavy chain 8, axonemal OS=Homo sapiens GN=DNAH8 PE=1 SV=2 |
| 3    | 5.46  | 59.9    | 2   | 13/25            | K3468k         | (R)JETLSPNNALFEKVK(V)  | 1702.9374                       | 114.0067                   | -19.9                       | 514666.7/5.95      | HUMAN   | RQ96JB1     | REVERSE Dynein heavy chain 8, axonemal OS=Homo sapiens GN=DNAH8 PE=1 SV=2 |

Detailed Results

| Rank | Score | SPI (%) | BCS | # Unmatched Ions | Variable sites | Sequence               | MH <sup>+</sup> Calculated (Da) | MH <sup>+</sup> Error (Da) | MH <sup>+</sup> Error (ppm) | Protein MW/pi (Da) | Species | Accession # | MS-Digest Index # | Protein Name                                                       |
|------|-------|---------|-----|------------------|----------------|------------------------|---------------------------------|----------------------------|-----------------------------|--------------------|---------|-------------|-------------------|--------------------------------------------------------------------|
| 1    | 18.01 | 96.3    | 9   | 2/25             | K49k           | (K)AAGVNVPEFWPGLFAK(A) | 1702.8952                       | 114.0490                   | 3.3                         | 11514.0/4.26       | HUMAN   | P05386      | 632593            | 60S acidic ribosomal protein P1 OS=Homo sapiens GN=RPLP1 PE=1 SV=1 |

  

| Fragment-ion (m/z)      | 72.082 | 86.095 | 261.158 | 271.175 | 299.173 | 332.193 | 396.197 | 413.218 | 467.269 | 479.261 | 484.288 | 495.253 | 512.284 | 623.316 | 641.327 | 642.323 <sup>2</sup> | 746.419 | 932.498 | 1053.519 | 1071.520 | 1176.621 | 1287.651 | 1305.659 | 1485.737 | 1518.761 |
|-------------------------|--------|--------|---------|---------|---------|---------|---------|---------|---------|---------|---------|---------|---------|---------|---------|----------------------|---------|---------|----------|----------|----------|----------|----------|----------|----------|
| Frac. Inten. (% of TIC) | 0.04   | 0.06   | 5.44    | 3.34    | 1.82    | 4.23    | 2.63    | 2.51    | 2.09    | 4.70    | 2.07    | 3.33    | 4.81    | 3.87    | 3.36    | 1.63                 | 17.82   | 2.91    | 2.05     | 4.76     | 14.58    | 2.18     | 5.51     | 1.39     | 2.87     |
| Rel. Inten. (% of BP)   | 0.23   | 0.35   | 30.53   | 18.74   | 10.20   | 23.75   | 14.74   | 14.10   | 11.70   | 26.35   | 11.64   | 18.67   | 26.96   | 18.83   | 21.69   | 9.15                 | 100.00  | 16.34   | 11.50    | 26.70    | 81.79    | 12.24    | 30.91    | 7.80     | 16.12    |
| Score                   | 0.50   | 0.22   | 1.50    | 0.50    | 0.50    | 1.50    | 0.25    | 0.50    | -0.12   | 1.50    | 0.50    | 0.25    | 0.50    | 0.25    | 0.50    | -0.09                | 1.50    | 1.50    | 0.25     | 0.50     | 1.50     | 0.50     | 1.50     | 0.50     | 1.50     |
| Ion-type                | V      | LI     | y1      | a4      | b4      | y2      | b5-NH3  | b5      | y3      | a6      | b6-NH3  | b6      | b7-H2O  | b7      | b7      |                      | y6      | y7      | b10-H2O  | b10      | y9       | y10-H2O  | y10      | b14      | y12      |
| Delta ppm               | 11.4   | -20.0  |         | 7.2     | 3.4     | 2.0     | LFA     | 5.6     | -0.1    | -1.9    | -9.4    | -0.4    | 0.1     | 1.2     |         | -1.3                 | -0.9    | 2.7     | -6.9     | 0.7      | -1.1     | -2.5     | -10.9    | -8.3     |          |

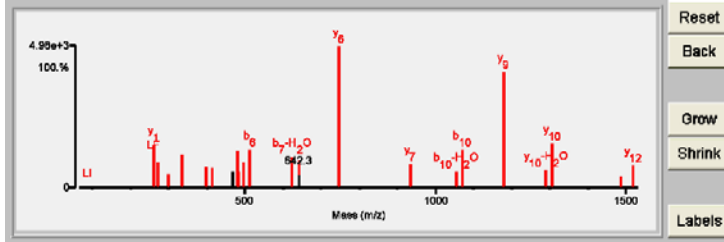

Result Summary

| Rank | Score | SPI (%) | BCS | # Unmatched Ions | Variable sites | Sequence                   | MH <sup>+</sup> Calculated (Da) | MH <sup>+</sup> Error (Da) | MH <sup>+</sup> Error (ppm) | Protein MW/pI (Da) | Species | Accession # | Protein Name                                                       |
|------|-------|---------|-----|------------------|----------------|----------------------------|---------------------------------|----------------------------|-----------------------------|--------------------|---------|-------------|--------------------------------------------------------------------|
| 1    | 20.91 | 82.6    | 11  | 7/25             | K21k           | (R)YVASYLLAALGGNSSPSAKD(K) | 2225.1812                       | 114.0417                   | -0.5                        | 11665.0/4.42       | HUMAN   | P05387      | 60S acidic ribosomal protein P2 OS=Homo sapiens GN=RPLP2 PE=1 SV=1 |
| 2    | 17.65 | 77.0    | 9   | 9/25             | K24k           | (R)YVASYLLAALGGNSSPSAKD(K) | 2225.1812                       | 114.0417                   | -0.5                        | 11665.0/4.42       | HUMAN   | P05387      | 60S acidic ribosomal protein P2 OS=Homo sapiens GN=RPLP2 PE=1 SV=1 |

Detailed Results

| Rank                                                                                                                                                                                                                                                                                                                                                                                                                                                                                                                                                                                                                                                                                                                                                                                                                                                                                                                                                                                                                                                                                                                                                                                                                                                                                                                                                                                                                                                                                                                                                                                                                                                                                                                                                                                                                                                                                                                                                                                                                                                                                                                                                                                                                                                                                                                                                                                                                                                                                                                                                                                                                                                                                                  | Score  | SPI (%) | BCS     | # Unmatched Ions | Variable sites | Sequence                   | MH <sup>+</sup> Calculated (Da) | MH <sup>+</sup> Error (Da) | MH <sup>+</sup> Error (ppm) | Protein MW/pI (Da) | Species | Accession # | MS-Digest Index #     | Protein Name                                                       |                    |                       |                       |                       |                       |         |                       |         |                        |                        |          |         |         |                       |                       |         |                       |                       |                       |                       |         |                       |         |                        |                        |          |                         |      |      |      |      |       |      |      |      |      |      |      |      |      |      |      |      |      |      |      |      |      |      |      |      |      |                       |      |      |      |      |        |       |       |       |      |       |       |      |      |       |       |       |       |       |       |       |       |       |       |       |       |       |      |      |      |       |      |       |      |      |      |      |       |       |      |       |      |      |       |      |      |      |      |       |      |      |      |          |    |    |    |  |    |  |    |    |    |    |  |  |                 |  |    |                   |  |                   |                   |    |                   |  |                   |                   |     |           |      |       |       |  |      |  |      |     |     |       |  |  |       |  |      |     |  |       |      |      |     |  |      |     |       |
|-------------------------------------------------------------------------------------------------------------------------------------------------------------------------------------------------------------------------------------------------------------------------------------------------------------------------------------------------------------------------------------------------------------------------------------------------------------------------------------------------------------------------------------------------------------------------------------------------------------------------------------------------------------------------------------------------------------------------------------------------------------------------------------------------------------------------------------------------------------------------------------------------------------------------------------------------------------------------------------------------------------------------------------------------------------------------------------------------------------------------------------------------------------------------------------------------------------------------------------------------------------------------------------------------------------------------------------------------------------------------------------------------------------------------------------------------------------------------------------------------------------------------------------------------------------------------------------------------------------------------------------------------------------------------------------------------------------------------------------------------------------------------------------------------------------------------------------------------------------------------------------------------------------------------------------------------------------------------------------------------------------------------------------------------------------------------------------------------------------------------------------------------------------------------------------------------------------------------------------------------------------------------------------------------------------------------------------------------------------------------------------------------------------------------------------------------------------------------------------------------------------------------------------------------------------------------------------------------------------------------------------------------------------------------------------------------------|--------|---------|---------|------------------|----------------|----------------------------|---------------------------------|----------------------------|-----------------------------|--------------------|---------|-------------|-----------------------|--------------------------------------------------------------------|--------------------|-----------------------|-----------------------|-----------------------|-----------------------|---------|-----------------------|---------|------------------------|------------------------|----------|---------|---------|-----------------------|-----------------------|---------|-----------------------|-----------------------|-----------------------|-----------------------|---------|-----------------------|---------|------------------------|------------------------|----------|-------------------------|------|------|------|------|-------|------|------|------|------|------|------|------|------|------|------|------|------|------|------|------|------|------|------|------|------|-----------------------|------|------|------|------|--------|-------|-------|-------|------|-------|-------|------|------|-------|-------|-------|-------|-------|-------|-------|-------|-------|-------|-------|-------|-------|------|------|------|-------|------|-------|------|------|------|------|-------|-------|------|-------|------|------|-------|------|------|------|------|-------|------|------|------|----------|----|----|----|--|----|--|----|----|----|----|--|--|-----------------|--|----|-------------------|--|-------------------|-------------------|----|-------------------|--|-------------------|-------------------|-----|-----------|------|-------|-------|--|------|--|------|-----|-----|-------|--|--|-------|--|------|-----|--|-------|------|------|-----|--|------|-----|-------|
| 1                                                                                                                                                                                                                                                                                                                                                                                                                                                                                                                                                                                                                                                                                                                                                                                                                                                                                                                                                                                                                                                                                                                                                                                                                                                                                                                                                                                                                                                                                                                                                                                                                                                                                                                                                                                                                                                                                                                                                                                                                                                                                                                                                                                                                                                                                                                                                                                                                                                                                                                                                                                                                                                                                                     | 20.91  | 82.6    | 11      | 7/25             | K21k           | (R)YVASYLLAALGGNSSPSAKD(K) | 2225.1812                       | 114.0417                   | -0.5                        | 11665.0/4.42       | HUMAN   | P05387      | 632663                | 60S acidic ribosomal protein P2 OS=Homo sapiens GN=RPLP2 PE=1 SV=1 |                    |                       |                       |                       |                       |         |                       |         |                        |                        |          |         |         |                       |                       |         |                       |                       |                       |                       |         |                       |         |                        |                        |          |                         |      |      |      |      |       |      |      |      |      |      |      |      |      |      |      |      |      |      |      |      |      |      |      |      |      |                       |      |      |      |      |        |       |       |       |      |       |       |      |      |       |       |       |       |       |       |       |       |       |       |       |       |       |      |      |      |       |      |       |      |      |      |      |       |       |      |       |      |      |       |      |      |      |      |       |      |      |      |          |    |    |    |  |    |  |    |    |    |    |  |  |                 |  |    |                   |  |                   |                   |    |                   |  |                   |                   |     |           |      |       |       |  |      |  |      |     |     |       |  |  |       |  |      |     |  |       |      |      |     |  |      |     |       |
| <table border="1"> <thead> <tr> <th>Fragment-ion (m/z)</th> <th>84.080</th> <th>86.095</th> <th>136.073</th> <th>137.071</th> <th>235.144</th> <th>236.148</th> <th>260.196</th> <th>263.140</th> <th>334.180</th> <th>375.216</th> <th>390.212</th> <th>417.218</th> <th>436.739<sup>+2</sup></th> <th>601.319<sup>+2</sup></th> <th>617.360</th> <th>694.368<sup>+2</sup></th> <th>729.323<sup>+2</sup></th> <th>765.379<sup>+2</sup></th> <th>821.937<sup>+2</sup></th> <th>872.484</th> <th>878.486<sup>+2</sup></th> <th>960.498</th> <th>1003.524<sup>+2</sup></th> <th>1039.050<sup>+2</sup></th> <th>1274.617</th> </tr> </thead> <tbody> <tr> <td>Frac. Inten. (% of TIC)</td> <td>0.11</td> <td>0.15</td> <td>0.58</td> <td>1.98</td> <td>21.52</td> <td>2.79</td> <td>3.35</td> <td>5.82</td> <td>2.05</td> <td>2.25</td> <td>2.15</td> <td>2.04</td> <td>1.96</td> <td>2.28</td> <td>4.24</td> <td>4.21</td> <td>3.55</td> <td>2.58</td> <td>4.01</td> <td>8.52</td> <td>4.44</td> <td>2.59</td> <td>3.23</td> <td>9.29</td> <td>4.31</td> </tr> <tr> <td>Rel. Inten. (% of BP)</td> <td>0.50</td> <td>0.71</td> <td>2.70</td> <td>9.19</td> <td>100.00</td> <td>12.98</td> <td>15.55</td> <td>27.06</td> <td>9.55</td> <td>10.46</td> <td>10.01</td> <td>9.47</td> <td>9.10</td> <td>10.61</td> <td>19.69</td> <td>19.55</td> <td>16.50</td> <td>11.97</td> <td>18.63</td> <td>39.61</td> <td>20.62</td> <td>12.06</td> <td>15.02</td> <td>43.20</td> <td>20.05</td> </tr> <tr> <td>Score</td> <td>0.50</td> <td>0.22</td> <td>1.00</td> <td>-0.09</td> <td>0.50</td> <td>-0.13</td> <td>1.50</td> <td>0.50</td> <td>0.50</td> <td>1.50</td> <td>-0.10</td> <td>-0.09</td> <td>1.50</td> <td>-0.11</td> <td>1.50</td> <td>1.50</td> <td>-0.17</td> <td>1.50</td> <td>1.50</td> <td>1.50</td> <td>1.50</td> <td>-0.12</td> <td>1.50</td> <td>1.50</td> <td>1.50</td> </tr> <tr> <td>Ion-type</td> <td>KQ</td> <td>LI</td> <td>at</td> <td></td> <td>b2</td> <td></td> <td>y2</td> <td>b2</td> <td>b3</td> <td>y3</td> <td></td> <td></td> <td>y<sup>+2</sup></td> <td></td> <td>y4</td> <td>y13<sup>+2</sup></td> <td></td> <td>y15<sup>+2</sup></td> <td>y16<sup>+2</sup></td> <td>y7</td> <td>y17<sup>+2</sup></td> <td></td> <td>y19<sup>+2</sup></td> <td>y20<sup>+2</sup></td> <td>y12</td> </tr> <tr> <td>Delta ppm</td> <td>-5.7</td> <td>-21.2</td> <td>-24.9</td> <td></td> <td>-5.5</td> <td></td> <td>-4.9</td> <td>0.3</td> <td>8.6</td> <td>-20.8</td> <td></td> <td></td> <td>-14.3</td> <td></td> <td>-3.1</td> <td>7.6</td> <td></td> <td>-27.4</td> <td>-5.4</td> <td>-0.1</td> <td>2.2</td> <td></td> <td>-7.4</td> <td>0.3</td> <td>-13.4</td> </tr> </tbody> </table> |        |         |         |                  |                |                            |                                 |                            |                             |                    |         |             |                       |                                                                    | Fragment-ion (m/z) | 84.080                | 86.095                | 136.073               | 137.071               | 235.144 | 236.148               | 260.196 | 263.140                | 334.180                | 375.216  | 390.212 | 417.218 | 436.739 <sup>+2</sup> | 601.319 <sup>+2</sup> | 617.360 | 694.368 <sup>+2</sup> | 729.323 <sup>+2</sup> | 765.379 <sup>+2</sup> | 821.937 <sup>+2</sup> | 872.484 | 878.486 <sup>+2</sup> | 960.498 | 1003.524 <sup>+2</sup> | 1039.050 <sup>+2</sup> | 1274.617 | Frac. Inten. (% of TIC) | 0.11 | 0.15 | 0.58 | 1.98 | 21.52 | 2.79 | 3.35 | 5.82 | 2.05 | 2.25 | 2.15 | 2.04 | 1.96 | 2.28 | 4.24 | 4.21 | 3.55 | 2.58 | 4.01 | 8.52 | 4.44 | 2.59 | 3.23 | 9.29 | 4.31 | Rel. Inten. (% of BP) | 0.50 | 0.71 | 2.70 | 9.19 | 100.00 | 12.98 | 15.55 | 27.06 | 9.55 | 10.46 | 10.01 | 9.47 | 9.10 | 10.61 | 19.69 | 19.55 | 16.50 | 11.97 | 18.63 | 39.61 | 20.62 | 12.06 | 15.02 | 43.20 | 20.05 | Score | 0.50 | 0.22 | 1.00 | -0.09 | 0.50 | -0.13 | 1.50 | 0.50 | 0.50 | 1.50 | -0.10 | -0.09 | 1.50 | -0.11 | 1.50 | 1.50 | -0.17 | 1.50 | 1.50 | 1.50 | 1.50 | -0.12 | 1.50 | 1.50 | 1.50 | Ion-type | KQ | LI | at |  | b2 |  | y2 | b2 | b3 | y3 |  |  | y <sup>+2</sup> |  | y4 | y13 <sup>+2</sup> |  | y15 <sup>+2</sup> | y16 <sup>+2</sup> | y7 | y17 <sup>+2</sup> |  | y19 <sup>+2</sup> | y20 <sup>+2</sup> | y12 | Delta ppm | -5.7 | -21.2 | -24.9 |  | -5.5 |  | -4.9 | 0.3 | 8.6 | -20.8 |  |  | -14.3 |  | -3.1 | 7.6 |  | -27.4 | -5.4 | -0.1 | 2.2 |  | -7.4 | 0.3 | -13.4 |
| Fragment-ion (m/z)                                                                                                                                                                                                                                                                                                                                                                                                                                                                                                                                                                                                                                                                                                                                                                                                                                                                                                                                                                                                                                                                                                                                                                                                                                                                                                                                                                                                                                                                                                                                                                                                                                                                                                                                                                                                                                                                                                                                                                                                                                                                                                                                                                                                                                                                                                                                                                                                                                                                                                                                                                                                                                                                                    | 84.080 | 86.095  | 136.073 | 137.071          | 235.144        | 236.148                    | 260.196                         | 263.140                    | 334.180                     | 375.216            | 390.212 | 417.218     | 436.739 <sup>+2</sup> | 601.319 <sup>+2</sup>                                              | 617.360            | 694.368 <sup>+2</sup> | 729.323 <sup>+2</sup> | 765.379 <sup>+2</sup> | 821.937 <sup>+2</sup> | 872.484 | 878.486 <sup>+2</sup> | 960.498 | 1003.524 <sup>+2</sup> | 1039.050 <sup>+2</sup> | 1274.617 |         |         |                       |                       |         |                       |                       |                       |                       |         |                       |         |                        |                        |          |                         |      |      |      |      |       |      |      |      |      |      |      |      |      |      |      |      |      |      |      |      |      |      |      |      |      |                       |      |      |      |      |        |       |       |       |      |       |       |      |      |       |       |       |       |       |       |       |       |       |       |       |       |       |      |      |      |       |      |       |      |      |      |      |       |       |      |       |      |      |       |      |      |      |      |       |      |      |      |          |    |    |    |  |    |  |    |    |    |    |  |  |                 |  |    |                   |  |                   |                   |    |                   |  |                   |                   |     |           |      |       |       |  |      |  |      |     |     |       |  |  |       |  |      |     |  |       |      |      |     |  |      |     |       |
| Frac. Inten. (% of TIC)                                                                                                                                                                                                                                                                                                                                                                                                                                                                                                                                                                                                                                                                                                                                                                                                                                                                                                                                                                                                                                                                                                                                                                                                                                                                                                                                                                                                                                                                                                                                                                                                                                                                                                                                                                                                                                                                                                                                                                                                                                                                                                                                                                                                                                                                                                                                                                                                                                                                                                                                                                                                                                                                               | 0.11   | 0.15    | 0.58    | 1.98             | 21.52          | 2.79                       | 3.35                            | 5.82                       | 2.05                        | 2.25               | 2.15    | 2.04        | 1.96                  | 2.28                                                               | 4.24               | 4.21                  | 3.55                  | 2.58                  | 4.01                  | 8.52    | 4.44                  | 2.59    | 3.23                   | 9.29                   | 4.31     |         |         |                       |                       |         |                       |                       |                       |                       |         |                       |         |                        |                        |          |                         |      |      |      |      |       |      |      |      |      |      |      |      |      |      |      |      |      |      |      |      |      |      |      |      |      |                       |      |      |      |      |        |       |       |       |      |       |       |      |      |       |       |       |       |       |       |       |       |       |       |       |       |       |      |      |      |       |      |       |      |      |      |      |       |       |      |       |      |      |       |      |      |      |      |       |      |      |      |          |    |    |    |  |    |  |    |    |    |    |  |  |                 |  |    |                   |  |                   |                   |    |                   |  |                   |                   |     |           |      |       |       |  |      |  |      |     |     |       |  |  |       |  |      |     |  |       |      |      |     |  |      |     |       |
| Rel. Inten. (% of BP)                                                                                                                                                                                                                                                                                                                                                                                                                                                                                                                                                                                                                                                                                                                                                                                                                                                                                                                                                                                                                                                                                                                                                                                                                                                                                                                                                                                                                                                                                                                                                                                                                                                                                                                                                                                                                                                                                                                                                                                                                                                                                                                                                                                                                                                                                                                                                                                                                                                                                                                                                                                                                                                                                 | 0.50   | 0.71    | 2.70    | 9.19             | 100.00         | 12.98                      | 15.55                           | 27.06                      | 9.55                        | 10.46              | 10.01   | 9.47        | 9.10                  | 10.61                                                              | 19.69              | 19.55                 | 16.50                 | 11.97                 | 18.63                 | 39.61   | 20.62                 | 12.06   | 15.02                  | 43.20                  | 20.05    |         |         |                       |                       |         |                       |                       |                       |                       |         |                       |         |                        |                        |          |                         |      |      |      |      |       |      |      |      |      |      |      |      |      |      |      |      |      |      |      |      |      |      |      |      |      |                       |      |      |      |      |        |       |       |       |      |       |       |      |      |       |       |       |       |       |       |       |       |       |       |       |       |       |      |      |      |       |      |       |      |      |      |      |       |       |      |       |      |      |       |      |      |      |      |       |      |      |      |          |    |    |    |  |    |  |    |    |    |    |  |  |                 |  |    |                   |  |                   |                   |    |                   |  |                   |                   |     |           |      |       |       |  |      |  |      |     |     |       |  |  |       |  |      |     |  |       |      |      |     |  |      |     |       |
| Score                                                                                                                                                                                                                                                                                                                                                                                                                                                                                                                                                                                                                                                                                                                                                                                                                                                                                                                                                                                                                                                                                                                                                                                                                                                                                                                                                                                                                                                                                                                                                                                                                                                                                                                                                                                                                                                                                                                                                                                                                                                                                                                                                                                                                                                                                                                                                                                                                                                                                                                                                                                                                                                                                                 | 0.50   | 0.22    | 1.00    | -0.09            | 0.50           | -0.13                      | 1.50                            | 0.50                       | 0.50                        | 1.50               | -0.10   | -0.09       | 1.50                  | -0.11                                                              | 1.50               | 1.50                  | -0.17                 | 1.50                  | 1.50                  | 1.50    | 1.50                  | -0.12   | 1.50                   | 1.50                   | 1.50     |         |         |                       |                       |         |                       |                       |                       |                       |         |                       |         |                        |                        |          |                         |      |      |      |      |       |      |      |      |      |      |      |      |      |      |      |      |      |      |      |      |      |      |      |      |      |                       |      |      |      |      |        |       |       |       |      |       |       |      |      |       |       |       |       |       |       |       |       |       |       |       |       |       |      |      |      |       |      |       |      |      |      |      |       |       |      |       |      |      |       |      |      |      |      |       |      |      |      |          |    |    |    |  |    |  |    |    |    |    |  |  |                 |  |    |                   |  |                   |                   |    |                   |  |                   |                   |     |           |      |       |       |  |      |  |      |     |     |       |  |  |       |  |      |     |  |       |      |      |     |  |      |     |       |
| Ion-type                                                                                                                                                                                                                                                                                                                                                                                                                                                                                                                                                                                                                                                                                                                                                                                                                                                                                                                                                                                                                                                                                                                                                                                                                                                                                                                                                                                                                                                                                                                                                                                                                                                                                                                                                                                                                                                                                                                                                                                                                                                                                                                                                                                                                                                                                                                                                                                                                                                                                                                                                                                                                                                                                              | KQ     | LI      | at      |                  | b2             |                            | y2                              | b2                         | b3                          | y3                 |         |             | y <sup>+2</sup>       |                                                                    | y4                 | y13 <sup>+2</sup>     |                       | y15 <sup>+2</sup>     | y16 <sup>+2</sup>     | y7      | y17 <sup>+2</sup>     |         | y19 <sup>+2</sup>      | y20 <sup>+2</sup>      | y12      |         |         |                       |                       |         |                       |                       |                       |                       |         |                       |         |                        |                        |          |                         |      |      |      |      |       |      |      |      |      |      |      |      |      |      |      |      |      |      |      |      |      |      |      |      |      |                       |      |      |      |      |        |       |       |       |      |       |       |      |      |       |       |       |       |       |       |       |       |       |       |       |       |       |      |      |      |       |      |       |      |      |      |      |       |       |      |       |      |      |       |      |      |      |      |       |      |      |      |          |    |    |    |  |    |  |    |    |    |    |  |  |                 |  |    |                   |  |                   |                   |    |                   |  |                   |                   |     |           |      |       |       |  |      |  |      |     |     |       |  |  |       |  |      |     |  |       |      |      |     |  |      |     |       |
| Delta ppm                                                                                                                                                                                                                                                                                                                                                                                                                                                                                                                                                                                                                                                                                                                                                                                                                                                                                                                                                                                                                                                                                                                                                                                                                                                                                                                                                                                                                                                                                                                                                                                                                                                                                                                                                                                                                                                                                                                                                                                                                                                                                                                                                                                                                                                                                                                                                                                                                                                                                                                                                                                                                                                                                             | -5.7   | -21.2   | -24.9   |                  | -5.5           |                            | -4.9                            | 0.3                        | 8.6                         | -20.8              |         |             | -14.3                 |                                                                    | -3.1               | 7.6                   |                       | -27.4                 | -5.4                  | -0.1    | 2.2                   |         | -7.4                   | 0.3                    | -13.4    |         |         |                       |                       |         |                       |                       |                       |                       |         |                       |         |                        |                        |          |                         |      |      |      |      |       |      |      |      |      |      |      |      |      |      |      |      |      |      |      |      |      |      |      |      |      |                       |      |      |      |      |        |       |       |       |      |       |       |      |      |       |       |       |       |       |       |       |       |       |       |       |       |       |      |      |      |       |      |       |      |      |      |      |       |       |      |       |      |      |       |      |      |      |      |       |      |      |      |          |    |    |    |  |    |  |    |    |    |    |  |  |                 |  |    |                   |  |                   |                   |    |                   |  |                   |                   |     |           |      |       |       |  |      |  |      |     |     |       |  |  |       |  |      |     |  |       |      |      |     |  |      |     |       |

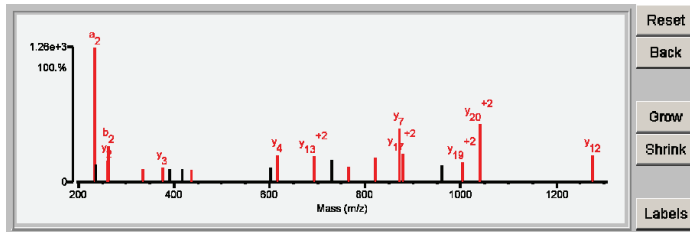

Result Summary

| Rank | Score | SPI (%) | BCS | # Unmatched Ions | Variable sites | Sequence                      | MH <sup>+</sup> Calculated (Da) | MH <sup>+</sup> Error (Da) | MH <sup>+</sup> Error (ppm) | Protein MW <sub>pl</sub> (Da) | Species | Accession # | Protein Name                                                       |
|------|-------|---------|-----|------------------|----------------|-------------------------------|---------------------------------|----------------------------|-----------------------------|-------------------------------|---------|-------------|--------------------------------------------------------------------|
| 1    | 10.66 | 75.3    | 6   | 10/25            | K41k           | (R)LNK <del>V</del> SELNGK(N) | 1214.7103                       | 114.0421                   | -0.6                        | 11665.0/4.42                  | HUMAN   | P05387      | 60S acidic ribosomal protein P2 OS=Homo sapiens GN=RPLP2 PE=1 SV=1 |

Detailed Results

| Rank | Score | SPI (%) | BCS | # Unmatched Ions | Variable sites | Sequence                      | MH <sup>+</sup> Calculated (Da) | MH <sup>+</sup> Error (Da) | MH <sup>+</sup> Error (ppm) | Protein MW <sub>pl</sub> (Da) | Species | Accession # | MS-Digest Index # | Protein Name                                                       |
|------|-------|---------|-----|------------------|----------------|-------------------------------|---------------------------------|----------------------------|-----------------------------|-------------------------------|---------|-------------|-------------------|--------------------------------------------------------------------|
| 1    | 10.66 | 75.3    | 6   | 10/25            | K41k           | (R)LNK <del>V</del> SELNGK(N) | 1214.7103                       | 114.0421                   | -0.6                        | 11665.0/4.42                  | HUMAN   | P05387      | 632663            | 60S acidic ribosomal protein P2 OS=Homo sapiens GN=RPLP2 PE=1 SV=1 |

  

| Fragment-ion (m/z)      | 69.071 | 70.065 | 72.081 | 84.081 | 85.086 | 86.097 | 87.056 | 110.072 | 129.103 | 130.088 | 141.102 | 173.124 | 204.134 | 228.135 | 271.173 | 301.149 | 314.211 | 318.176 | 319.186 <sup>+</sup> 2 | 413.246 | 453.254 | 470.267 | 569.346 | 647.335 | 760.425 |
|-------------------------|--------|--------|--------|--------|--------|--------|--------|---------|---------|---------|---------|---------|---------|---------|---------|---------|---------|---------|------------------------|---------|---------|---------|---------|---------|---------|
| Frac. Inten. (% of TIC) | 2.94   | 0.11   | 0.20   | 0.67   | 2.03   | 39.59  | 0.09   | 3.14    | 0.10    | 3.22    | 2.46    | 2.67    | 4.81    | 2.00    | 2.11    | 2.67    | 2.53    | 2.22    | 3.41                   | 3.32    | 2.77    | 2.56    | 2.30    | 8.60    | 3.51    |
| Rel. Inten. (% of BP)   | 7.44   | 0.27   | 0.51   | 1.69   | 5.12   | 100.00 | 0.22   | 7.92    | 0.25    | 8.12    | 6.21    | 6.73    | 12.16   | 5.05    | 5.33    | 6.73    | 6.38    | 5.62    | 8.61                   | 8.39    | 7.00    | 6.47    | 5.82    | 21.72   | 8.66    |
| Score                   | -0.07  | -0.00  |        | 0.50   | 0.50   | -0.05  | 0.50   | 0.33    | 0.20    | 0.50    | -0.06   | -0.07   | 1.50    | 0.75    | -0.05   | 0.50    | -0.06   | 1.50    | -0.09                  | -0.08   | 1.50    | 0.50    | 0.75    | 1.50    | 1.50    |
| Ion-type                |        |        | V      | KQ     |        | a1     | NR     |         | RKQ     | y1-NH3  |         |         | y2      |         | b2      | y3-NH3  |         | y3      |                        | b3-NH3  | b3      | b4      | y6      | y7      |         |
| Delta ppm               |        |        | -3.8   | 7.4    |        | -1.4   | 11.6   |         | 4.3     | 14.2    |         |         | -3.3    |         | -4.5    |         |         | -5.3    |                        | 16.5    | -13.5   | 7.3     | -1.5    | 6.8     |         |
|                         |        |        |        |        |        | LI     |        |         |         |         |         |         |         |         |         |         |         |         |                        |         |         | NkVI    |         |         |         |
|                         |        |        |        |        |        | 11.3   |        |         |         |         |         |         |         |         |         |         |         |         |                        |         |         | 7.3     |         |         |         |

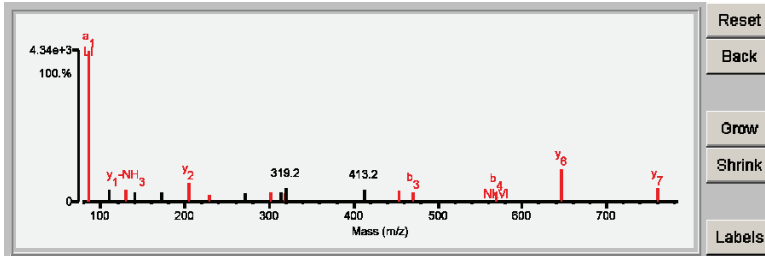

Result Summary

| Rank | Score | SPI (%) | BCS | # Unmatched Ions | Variable sites | Sequence                                           | MH <sup>+</sup> Calculated (Da) | MH <sup>+</sup> Error (Da) | MH <sup>+</sup> Error (ppm) | Protein MW/pi (Da) | Species | Accession # | Protein Name                                                       |
|------|-------|---------|-----|------------------|----------------|----------------------------------------------------|---------------------------------|----------------------------|-----------------------------|--------------------|---------|-------------|--------------------------------------------------------------------|
| 1    | 17.22 | 81.7    | 9   | 8/25             | K61k           | (K)NIEDVIAGIGKLSVPAAGGAVAVSAAPGSAAPAAAGSAPAAAEK(K) | 4012.0986                       | 114.0404                   | -0.6                        | 11665.0442         | HUMAN   | P05387      | 60S acidic ribosomal protein P2 OS=Homo sapiens GN=RPLP2 PE=1 SV=1 |

Detailed Results

| Rank | Score | SPI (%) | BCS | # Unmatched Ions | Variable sites | Sequence                                           | MH <sup>+</sup> Calculated (Da) | MH <sup>+</sup> Error (Da) | MH <sup>+</sup> Error (ppm) | Protein MW/pi (Da) | Species | Accession #           | MS-Digest Index #     | Protein Name                                                       |                   |         |                       |         |         |                       |                       |                       |         |          |                   |                        |                        |          |                        |          |          |
|------|-------|---------|-----|------------------|----------------|----------------------------------------------------|---------------------------------|----------------------------|-----------------------------|--------------------|---------|-----------------------|-----------------------|--------------------------------------------------------------------|-------------------|---------|-----------------------|---------|---------|-----------------------|-----------------------|-----------------------|---------|----------|-------------------|------------------------|------------------------|----------|------------------------|----------|----------|
| 1    | 17.22 | 81.7    | 9   | 8/25             | K61k           | (K)NIEDVIAGIGKLSVPAAGGAVAVSAAPGSAAPAAAGSAPAAAEK(K) | 4012.0986                       | 114.0404                   | -0.6                        | 11665.0442         | HUMAN   | P05387                | 632663                | 60S acidic ribosomal protein P2 OS=Homo sapiens GN=RPLP2 PE=1 SV=1 |                   |         |                       |         |         |                       |                       |                       |         |          |                   |                        |                        |          |                        |          |          |
|      |       |         |     |                  |                | Fragment-ion (m/z)                                 | 169.095                         | 240.134                    | 295.136                     | 384.183            | 571.260 | 585.290 <sup>+2</sup> | 620.821 <sup>+2</sup> | 715.357                                                            | 754.418           | 767.864 | 776.879 <sup>+2</sup> | 803.936 | 812.425 | 843.405               | 852.972 <sup>+2</sup> | 873.450 <sup>+2</sup> | 930.448 | 1025.472 | 1169.573          | 1202.607 <sup>+2</sup> | 1235.639 <sup>+2</sup> | 1240.603 | 1287.653 <sup>+2</sup> | 1552.752 | 1722.938 |
|      |       |         |     |                  |                | Frac. Inten. (% of TIC)                            | 2.25                            | 2.01                       | 2.72                        | 3.03               | 2.50    | 9.81                  | 3.30                  | 4.93                                                               | 2.69              | 2.11    | 10.29                 | 1.92    | 2.29    | 1.92                  | 6.96                  | 2.63                  | 7.54    | 2.03     | 10.08             | 6.40                   | 2.26                   | 1.79     | 2.33                   | 2.90     | 3.22     |
|      |       |         |     |                  |                | Rel. Inten. (% of BP)                              | 21.87                           | 19.53                      | 26.39                       | 29.42              | 24.31   | 95.27                 | 32.97                 | 47.84                                                              | 26.11             | 20.54   | 100.00                | 18.67   | 22.22   | 18.65                 | 67.59                 | 25.53                 | 73.29   | 19.76    | 97.91             | 62.15                  | 21.97                  | 17.35    | 22.64                  | 28.14    | 31.31    |
|      |       |         |     |                  |                | Score                                              | 0.75                            | 0.75                       | -0.26                       | 0.75               | 0.50    | 1.50                  | 1.50                  | 1.50                                                               | 1.50              | -0.26   | -0.21                 | 1.50    | -0.19   | 1.50                  | 0.25                  | -0.26                 | 1.50    | -0.20    | 1.50              | 1.50                   | -0.22                  | 1.50     | 0.50                   | 1.50     | 0.50     |
|      |       |         |     |                  |                | Ion-type                                           | PA                              | PAA                        |                             | GSAPA              | bs      | y13 <sup>+2</sup>     | y14 <sup>+2</sup>     | y7                                                                 | y18 <sup>+2</sup> |         | y18 <sup>+2</sup>     |         | b++15   | b16+H2O <sup>+2</sup> |                       | y10                   |         | y13      | y29 <sup>+2</sup> | y14                    | b27 <sup>+2</sup>      | y18      | b16                    |          |          |
|      |       |         |     |                  |                | Delta ppm                                          | -18.0                           | -5.3                       |                             | -14.5              | -23.8   | -6.6                  | 13.8                  | -7.4                                                               |                   |         | -6.7                  |         | -17.7   | 4.8                   |                       | -4.8                  |         | -6.1     | -1.6              |                        | -10.8                  | -35.4    | -5.0                   | -1.1     |          |

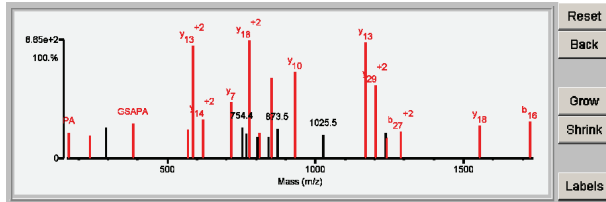

Result Summary

| Rank | Score | SPI (%) | BCS | # Unmatched ions | Variable sites | Sequence                                                        | MH <sup>+</sup> Calculated (Da) | MH <sup>+</sup> Error (Da) | MH <sup>+</sup> Error (ppm) | Protein MW/pi (Da) | Species | Accession #            | Protein Name                                                 |
|------|-------|---------|-----|------------------|----------------|-----------------------------------------------------------------|---------------------------------|----------------------------|-----------------------------|--------------------|---------|------------------------|--------------------------------------------------------------|
| 1    | 16.61 | 73.4    | 8   | 8/25             | K169k          | (R)W <b>FQ</b> Q <b>Y</b> D <b>G</b> I <b>L</b> P <b>G</b> K(-) | 1692.9108                       | 114.0524                   | 5.3                         | 20252.5/9.64       | HUMAN   | <a href="#">P62913</a> | 60S ribosomal protein L11 OS=Homo sapiens GN=RPL11 PE=1 SV=2 |

Detailed Results

| Rank                                                                                                                                                                                                                                                                                                                                                                                                                                                                                                                                                                                                                                                                                                                                                                                                                                                                                                                                                                                                                                                                                                                                                                                                                                                                                                                                                                                                                                                                                                                                                                                                                                                                                                                                                                                                                                                                                                                                                                                                                                                                                                                                                                                                                                                                                                                                                                                                                                                                                                                     | Score  | SPI (%) | BCS    | # Unmatched ions | Variable sites | Sequence                                                                                             | MH <sup>+</sup> Calculated (Da) | MH <sup>+</sup> Error (Da) | MH <sup>+</sup> Error (ppm) | Protein MW/pi (Da) | Species | Accession #            | MS-Digest Index #      | Protein Name                                                 |                    |         |         |         |         |         |         |         |                       |                       |         |         |         |         |         |         |         |         |         |         |         |         |         |                       |                       |         |                         |      |      |      |      |      |      |      |      |      |      |      |      |      |      |       |      |      |      |      |      |      |      |      |      |      |                       |       |      |      |      |       |      |      |      |      |      |      |       |      |       |        |      |       |       |      |      |      |       |      |       |      |       |       |      |      |      |       |      |      |      |       |       |      |       |      |       |      |      |      |      |      |       |      |      |       |      |      |          |  |    |    |     |  |   |    |    |  |  |    |  |     |  |    |    |    |    |    |  |        |    |  |                       |    |           |  |      |      |       |  |      |       |       |      |  |       |  |      |  |      |       |      |       |       |  |       |      |  |      |     |
|--------------------------------------------------------------------------------------------------------------------------------------------------------------------------------------------------------------------------------------------------------------------------------------------------------------------------------------------------------------------------------------------------------------------------------------------------------------------------------------------------------------------------------------------------------------------------------------------------------------------------------------------------------------------------------------------------------------------------------------------------------------------------------------------------------------------------------------------------------------------------------------------------------------------------------------------------------------------------------------------------------------------------------------------------------------------------------------------------------------------------------------------------------------------------------------------------------------------------------------------------------------------------------------------------------------------------------------------------------------------------------------------------------------------------------------------------------------------------------------------------------------------------------------------------------------------------------------------------------------------------------------------------------------------------------------------------------------------------------------------------------------------------------------------------------------------------------------------------------------------------------------------------------------------------------------------------------------------------------------------------------------------------------------------------------------------------------------------------------------------------------------------------------------------------------------------------------------------------------------------------------------------------------------------------------------------------------------------------------------------------------------------------------------------------------------------------------------------------------------------------------------------------|--------|---------|--------|------------------|----------------|------------------------------------------------------------------------------------------------------|---------------------------------|----------------------------|-----------------------------|--------------------|---------|------------------------|------------------------|--------------------------------------------------------------|--------------------|---------|---------|---------|---------|---------|---------|---------|-----------------------|-----------------------|---------|---------|---------|---------|---------|---------|---------|---------|---------|---------|---------|---------|---------|-----------------------|-----------------------|---------|-------------------------|------|------|------|------|------|------|------|------|------|------|------|------|------|------|-------|------|------|------|------|------|------|------|------|------|------|-----------------------|-------|------|------|------|-------|------|------|------|------|------|------|-------|------|-------|--------|------|-------|-------|------|------|------|-------|------|-------|------|-------|-------|------|------|------|-------|------|------|------|-------|-------|------|-------|------|-------|------|------|------|------|------|-------|------|------|-------|------|------|----------|--|----|----|-----|--|---|----|----|--|--|----|--|-----|--|----|----|----|----|----|--|--------|----|--|-----------------------|----|-----------|--|------|------|-------|--|------|-------|-------|------|--|-------|--|------|--|------|-------|------|-------|-------|--|-------|------|--|------|-----|
| 1                                                                                                                                                                                                                                                                                                                                                                                                                                                                                                                                                                                                                                                                                                                                                                                                                                                                                                                                                                                                                                                                                                                                                                                                                                                                                                                                                                                                                                                                                                                                                                                                                                                                                                                                                                                                                                                                                                                                                                                                                                                                                                                                                                                                                                                                                                                                                                                                                                                                                                                        | 16.61  | 73.4    | 8      | 8/25             | K169k          | (R)W <b>F</b> Q <b>Q</b> <b>Y</b> <b>D</b> <b>G</b> <b>I</b> <b>L</b> <b>P</b> <b>G</b> <b>K</b> (-) | 1692.9108                       | 114.0524                   | 5.3                         | 20252.5/9.64       | HUMAN   | <a href="#">P62913</a> | <a href="#">585835</a> | 60S ribosomal protein L11 OS=Homo sapiens GN=RPL11 PE=1 SV=2 |                    |         |         |         |         |         |         |         |                       |                       |         |         |         |         |         |         |         |         |         |         |         |         |         |                       |                       |         |                         |      |      |      |      |      |      |      |      |      |      |      |      |      |      |       |      |      |      |      |      |      |      |      |      |      |                       |       |      |      |      |       |      |      |      |      |      |      |       |      |       |        |      |       |       |      |      |      |       |      |       |      |       |       |      |      |      |       |      |      |      |       |       |      |       |      |       |      |      |      |      |      |       |      |      |       |      |      |          |  |    |    |     |  |   |    |    |  |  |    |  |     |  |    |    |    |    |    |  |        |    |  |                       |    |           |  |      |      |       |  |      |       |       |      |  |       |  |      |  |      |       |      |       |       |  |       |      |  |      |     |
| <table border="1"> <thead> <tr> <th>Fragment-ion (m/z)</th> <th>84.044</th> <th>84.080</th> <th>86.096</th> <th>129.099</th> <th>130.071</th> <th>136.076</th> <th>147.110</th> <th>159.090</th> <th>170.059</th> <th>187.140</th> <th>204.132</th> <th>234.123</th> <th>284.202</th> <th>289.133</th> <th>301.185</th> <th>306.158</th> <th>334.155</th> <th>414.266</th> <th>527.347</th> <th>543.307</th> <th>573.232</th> <th>697.457</th> <th>719.928<sup>+2</sup></th> <th>728.398<sup>+2</sup></th> <th>812.494</th> </tr> </thead> <tbody> <tr> <td>Frac. Inten. (% of TIC)</td> <td>3.73</td> <td>0.20</td> <td>0.30</td> <td>0.09</td> <td>4.31</td> <td>0.12</td> <td>2.87</td> <td>0.30</td> <td>3.14</td> <td>2.72</td> <td>2.68</td> <td>3.75</td> <td>2.82</td> <td>3.34</td> <td>32.92</td> <td>3.15</td> <td>4.00</td> <td>5.97</td> <td>2.65</td> <td>2.58</td> <td>2.77</td> <td>5.85</td> <td>3.03</td> <td>3.97</td> <td>2.75</td> </tr> <tr> <td>Rel. Inten. (% of BP)</td> <td>11.34</td> <td>0.62</td> <td>0.90</td> <td>0.28</td> <td>13.08</td> <td>0.36</td> <td>8.70</td> <td>0.91</td> <td>9.54</td> <td>8.27</td> <td>8.14</td> <td>11.40</td> <td>8.56</td> <td>10.14</td> <td>100.00</td> <td>9.56</td> <td>12.14</td> <td>18.14</td> <td>8.04</td> <td>7.84</td> <td>8.40</td> <td>17.77</td> <td>9.21</td> <td>12.05</td> <td>8.35</td> </tr> <tr> <td>Score</td> <td>-0.11</td> <td>0.50</td> <td>0.22</td> <td>0.20</td> <td>-0.13</td> <td>1.00</td> <td>1.50</td> <td>2.00</td> <td>-0.10</td> <td>-0.08</td> <td>1.50</td> <td>-0.11</td> <td>0.75</td> <td>-0.10</td> <td>1.50</td> <td>0.50</td> <td>0.50</td> <td>1.50</td> <td>1.50</td> <td>-0.08</td> <td>0.25</td> <td>1.50</td> <td>-0.09</td> <td>0.50</td> <td>1.50</td> </tr> <tr> <td>Ion-type</td> <td></td> <td>KQ</td> <td>LI</td> <td>RKQ</td> <td></td> <td>Y</td> <td>y1</td> <td>a1</td> <td></td> <td></td> <td>y2</td> <td></td> <td>GII</td> <td></td> <td>y3</td> <td>a2</td> <td>b2</td> <td>y4</td> <td>y5</td> <td></td> <td>b4-NH3</td> <td>y7</td> <td></td> <td>y12+H2O<sup>+2</sup></td> <td>y8</td> </tr> <tr> <td>Delta ppm</td> <td></td> <td>-8.0</td> <td>-7.3</td> <td>-25.9</td> <td></td> <td>-0.7</td> <td>-20.4</td> <td>-14.9</td> <td>2.00</td> <td></td> <td>-10.1</td> <td></td> <td>14.2</td> <td></td> <td>-6.1</td> <td>-11.1</td> <td>-4.2</td> <td>-11.8</td> <td>-15.9</td> <td></td> <td>-25.8</td> <td>-5.1</td> <td></td> <td>-5.0</td> <td>7.3</td> </tr> </tbody> </table> |        |         |        |                  |                |                                                                                                      |                                 |                            |                             |                    |         |                        |                        |                                                              | Fragment-ion (m/z) | 84.044  | 84.080  | 86.096  | 129.099 | 130.071 | 136.076 | 147.110 | 159.090               | 170.059               | 187.140 | 204.132 | 234.123 | 284.202 | 289.133 | 301.185 | 306.158 | 334.155 | 414.266 | 527.347 | 543.307 | 573.232 | 697.457 | 719.928 <sup>+2</sup> | 728.398 <sup>+2</sup> | 812.494 | Frac. Inten. (% of TIC) | 3.73 | 0.20 | 0.30 | 0.09 | 4.31 | 0.12 | 2.87 | 0.30 | 3.14 | 2.72 | 2.68 | 3.75 | 2.82 | 3.34 | 32.92 | 3.15 | 4.00 | 5.97 | 2.65 | 2.58 | 2.77 | 5.85 | 3.03 | 3.97 | 2.75 | Rel. Inten. (% of BP) | 11.34 | 0.62 | 0.90 | 0.28 | 13.08 | 0.36 | 8.70 | 0.91 | 9.54 | 8.27 | 8.14 | 11.40 | 8.56 | 10.14 | 100.00 | 9.56 | 12.14 | 18.14 | 8.04 | 7.84 | 8.40 | 17.77 | 9.21 | 12.05 | 8.35 | Score | -0.11 | 0.50 | 0.22 | 0.20 | -0.13 | 1.00 | 1.50 | 2.00 | -0.10 | -0.08 | 1.50 | -0.11 | 0.75 | -0.10 | 1.50 | 0.50 | 0.50 | 1.50 | 1.50 | -0.08 | 0.25 | 1.50 | -0.09 | 0.50 | 1.50 | Ion-type |  | KQ | LI | RKQ |  | Y | y1 | a1 |  |  | y2 |  | GII |  | y3 | a2 | b2 | y4 | y5 |  | b4-NH3 | y7 |  | y12+H2O <sup>+2</sup> | y8 | Delta ppm |  | -8.0 | -7.3 | -25.9 |  | -0.7 | -20.4 | -14.9 | 2.00 |  | -10.1 |  | 14.2 |  | -6.1 | -11.1 | -4.2 | -11.8 | -15.9 |  | -25.8 | -5.1 |  | -5.0 | 7.3 |
| Fragment-ion (m/z)                                                                                                                                                                                                                                                                                                                                                                                                                                                                                                                                                                                                                                                                                                                                                                                                                                                                                                                                                                                                                                                                                                                                                                                                                                                                                                                                                                                                                                                                                                                                                                                                                                                                                                                                                                                                                                                                                                                                                                                                                                                                                                                                                                                                                                                                                                                                                                                                                                                                                                       | 84.044 | 84.080  | 86.096 | 129.099          | 130.071        | 136.076                                                                                              | 147.110                         | 159.090                    | 170.059                     | 187.140            | 204.132 | 234.123                | 284.202                | 289.133                                                      | 301.185            | 306.158 | 334.155 | 414.266 | 527.347 | 543.307 | 573.232 | 697.457 | 719.928 <sup>+2</sup> | 728.398 <sup>+2</sup> | 812.494 |         |         |         |         |         |         |         |         |         |         |         |         |                       |                       |         |                         |      |      |      |      |      |      |      |      |      |      |      |      |      |      |       |      |      |      |      |      |      |      |      |      |      |                       |       |      |      |      |       |      |      |      |      |      |      |       |      |       |        |      |       |       |      |      |      |       |      |       |      |       |       |      |      |      |       |      |      |      |       |       |      |       |      |       |      |      |      |      |      |       |      |      |       |      |      |          |  |    |    |     |  |   |    |    |  |  |    |  |     |  |    |    |    |    |    |  |        |    |  |                       |    |           |  |      |      |       |  |      |       |       |      |  |       |  |      |  |      |       |      |       |       |  |       |      |  |      |     |
| Frac. Inten. (% of TIC)                                                                                                                                                                                                                                                                                                                                                                                                                                                                                                                                                                                                                                                                                                                                                                                                                                                                                                                                                                                                                                                                                                                                                                                                                                                                                                                                                                                                                                                                                                                                                                                                                                                                                                                                                                                                                                                                                                                                                                                                                                                                                                                                                                                                                                                                                                                                                                                                                                                                                                  | 3.73   | 0.20    | 0.30   | 0.09             | 4.31           | 0.12                                                                                                 | 2.87                            | 0.30                       | 3.14                        | 2.72               | 2.68    | 3.75                   | 2.82                   | 3.34                                                         | 32.92              | 3.15    | 4.00    | 5.97    | 2.65    | 2.58    | 2.77    | 5.85    | 3.03                  | 3.97                  | 2.75    |         |         |         |         |         |         |         |         |         |         |         |         |                       |                       |         |                         |      |      |      |      |      |      |      |      |      |      |      |      |      |      |       |      |      |      |      |      |      |      |      |      |      |                       |       |      |      |      |       |      |      |      |      |      |      |       |      |       |        |      |       |       |      |      |      |       |      |       |      |       |       |      |      |      |       |      |      |      |       |       |      |       |      |       |      |      |      |      |      |       |      |      |       |      |      |          |  |    |    |     |  |   |    |    |  |  |    |  |     |  |    |    |    |    |    |  |        |    |  |                       |    |           |  |      |      |       |  |      |       |       |      |  |       |  |      |  |      |       |      |       |       |  |       |      |  |      |     |
| Rel. Inten. (% of BP)                                                                                                                                                                                                                                                                                                                                                                                                                                                                                                                                                                                                                                                                                                                                                                                                                                                                                                                                                                                                                                                                                                                                                                                                                                                                                                                                                                                                                                                                                                                                                                                                                                                                                                                                                                                                                                                                                                                                                                                                                                                                                                                                                                                                                                                                                                                                                                                                                                                                                                    | 11.34  | 0.62    | 0.90   | 0.28             | 13.08          | 0.36                                                                                                 | 8.70                            | 0.91                       | 9.54                        | 8.27               | 8.14    | 11.40                  | 8.56                   | 10.14                                                        | 100.00             | 9.56    | 12.14   | 18.14   | 8.04    | 7.84    | 8.40    | 17.77   | 9.21                  | 12.05                 | 8.35    |         |         |         |         |         |         |         |         |         |         |         |         |                       |                       |         |                         |      |      |      |      |      |      |      |      |      |      |      |      |      |      |       |      |      |      |      |      |      |      |      |      |      |                       |       |      |      |      |       |      |      |      |      |      |      |       |      |       |        |      |       |       |      |      |      |       |      |       |      |       |       |      |      |      |       |      |      |      |       |       |      |       |      |       |      |      |      |      |      |       |      |      |       |      |      |          |  |    |    |     |  |   |    |    |  |  |    |  |     |  |    |    |    |    |    |  |        |    |  |                       |    |           |  |      |      |       |  |      |       |       |      |  |       |  |      |  |      |       |      |       |       |  |       |      |  |      |     |
| Score                                                                                                                                                                                                                                                                                                                                                                                                                                                                                                                                                                                                                                                                                                                                                                                                                                                                                                                                                                                                                                                                                                                                                                                                                                                                                                                                                                                                                                                                                                                                                                                                                                                                                                                                                                                                                                                                                                                                                                                                                                                                                                                                                                                                                                                                                                                                                                                                                                                                                                                    | -0.11  | 0.50    | 0.22   | 0.20             | -0.13          | 1.00                                                                                                 | 1.50                            | 2.00                       | -0.10                       | -0.08              | 1.50    | -0.11                  | 0.75                   | -0.10                                                        | 1.50               | 0.50    | 0.50    | 1.50    | 1.50    | -0.08   | 0.25    | 1.50    | -0.09                 | 0.50                  | 1.50    |         |         |         |         |         |         |         |         |         |         |         |         |                       |                       |         |                         |      |      |      |      |      |      |      |      |      |      |      |      |      |      |       |      |      |      |      |      |      |      |      |      |      |                       |       |      |      |      |       |      |      |      |      |      |      |       |      |       |        |      |       |       |      |      |      |       |      |       |      |       |       |      |      |      |       |      |      |      |       |       |      |       |      |       |      |      |      |      |      |       |      |      |       |      |      |          |  |    |    |     |  |   |    |    |  |  |    |  |     |  |    |    |    |    |    |  |        |    |  |                       |    |           |  |      |      |       |  |      |       |       |      |  |       |  |      |  |      |       |      |       |       |  |       |      |  |      |     |
| Ion-type                                                                                                                                                                                                                                                                                                                                                                                                                                                                                                                                                                                                                                                                                                                                                                                                                                                                                                                                                                                                                                                                                                                                                                                                                                                                                                                                                                                                                                                                                                                                                                                                                                                                                                                                                                                                                                                                                                                                                                                                                                                                                                                                                                                                                                                                                                                                                                                                                                                                                                                 |        | KQ      | LI     | RKQ              |                | Y                                                                                                    | y1                              | a1                         |                             |                    | y2      |                        | GII                    |                                                              | y3                 | a2      | b2      | y4      | y5      |         | b4-NH3  | y7      |                       | y12+H2O <sup>+2</sup> | y8      |         |         |         |         |         |         |         |         |         |         |         |         |                       |                       |         |                         |      |      |      |      |      |      |      |      |      |      |      |      |      |      |       |      |      |      |      |      |      |      |      |      |      |                       |       |      |      |      |       |      |      |      |      |      |      |       |      |       |        |      |       |       |      |      |      |       |      |       |      |       |       |      |      |      |       |      |      |      |       |       |      |       |      |       |      |      |      |      |      |       |      |      |       |      |      |          |  |    |    |     |  |   |    |    |  |  |    |  |     |  |    |    |    |    |    |  |        |    |  |                       |    |           |  |      |      |       |  |      |       |       |      |  |       |  |      |  |      |       |      |       |       |  |       |      |  |      |     |
| Delta ppm                                                                                                                                                                                                                                                                                                                                                                                                                                                                                                                                                                                                                                                                                                                                                                                                                                                                                                                                                                                                                                                                                                                                                                                                                                                                                                                                                                                                                                                                                                                                                                                                                                                                                                                                                                                                                                                                                                                                                                                                                                                                                                                                                                                                                                                                                                                                                                                                                                                                                                                |        | -8.0    | -7.3   | -25.9            |                | -0.7                                                                                                 | -20.4                           | -14.9                      | 2.00                        |                    | -10.1   |                        | 14.2                   |                                                              | -6.1               | -11.1   | -4.2    | -11.8   | -15.9   |         | -25.8   | -5.1    |                       | -5.0                  | 7.3     |         |         |         |         |         |         |         |         |         |         |         |         |                       |                       |         |                         |      |      |      |      |      |      |      |      |      |      |      |      |      |      |       |      |      |      |      |      |      |      |      |      |      |                       |       |      |      |      |       |      |      |      |      |      |      |       |      |       |        |      |       |       |      |      |      |       |      |       |      |       |       |      |      |      |       |      |      |      |       |       |      |       |      |       |      |      |      |      |      |       |      |      |       |      |      |          |  |    |    |     |  |   |    |    |  |  |    |  |     |  |    |    |    |    |    |  |        |    |  |                       |    |           |  |      |      |       |  |      |       |       |      |  |       |  |      |  |      |       |      |       |       |  |       |      |  |      |     |

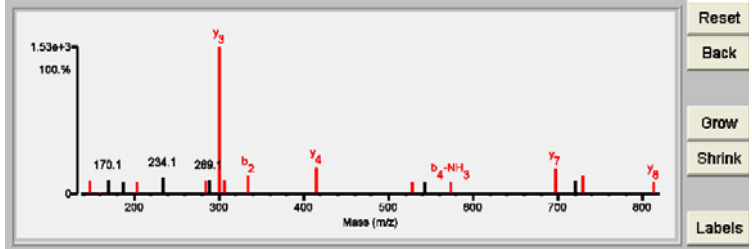

Reset  
Back  
Grow  
Shrink  
Labels

Result Summary

| Rank | Score | SPI (%) | BCS | # Unmatched Ions | Variable sites | Sequence                 | MH <sup>+</sup> Calculated (Da) | MH <sup>+</sup> Error (Da) | MH <sup>+</sup> Error (ppm) | Protein MW/pI (Da) | Species | Accession # | Protein Name                                                 |
|------|-------|---------|-----|------------------|----------------|--------------------------|---------------------------------|----------------------------|-----------------------------|--------------------|---------|-------------|--------------------------------------------------------------|
| 1    | 11.91 | 73.8    | 9   | 8/25             | K38k           | (R)AAKLVLEQLTGQTPVFSK(A) | 1817.0167                       | 114.0478                   | 2.5                         | 20252.5/9.64       | HUMAN   | P62913      | 60S ribosomal protein L11 OS=Homo sapiens GN=RPL11 PE=1 SV=2 |

Detailed Results

| Rank | Score | SPI (%) | BCS | # Unmatched Ions | Variable sites | Sequence                                   | MH <sup>+</sup> Calculated (Da) | MH <sup>+</sup> Error (Da) | MH <sup>+</sup> Error (ppm) | Protein MW/pI (Da) | Species | Accession # | MS-Digest Index # | Protein Name                                                 |
|------|-------|---------|-----|------------------|----------------|--------------------------------------------|---------------------------------|----------------------------|-----------------------------|--------------------|---------|-------------|-------------------|--------------------------------------------------------------|
| 1    | 11.91 | 73.8    | 9   | 8/25             | K38k           | (R)A A K V L V E Q L T G Q T P V F S K (A) | 1817.0167                       | 114.0478                   | 2.5                         | 20252.5/9.64       | HUMAN   | P62913      | 585835            | 60S ribosomal protein L11 OS=Homo sapiens GN=RPL11 PE=1 SV=2 |

  

| Fragment-ion (m/z)     | 84.079 | 86.097 | 101.068 | 129.064 | 129.101 | 131.084 | 197.128 | 230.617 | 234.146 | 235.138 | 289.171 | 328.191 | 381.208 | 385.220 | 418.234 | 465.733 | 470.259 <sup>+</sup> 2 | 484.277 <sup>+</sup> 2 | 531.287 <sup>+</sup> 2 | 577.337 | 597.357 | 678.373 | 726.408 | 863.461 | 964.496 |
|------------------------|--------|--------|---------|---------|---------|---------|---------|---------|---------|---------|---------|---------|---------|---------|---------|---------|------------------------|------------------------|------------------------|---------|---------|---------|---------|---------|---------|
| Frac. Inten.(% of TIC) | 0.18   | 0.27   | 0.20    | 0.15    | 0.12    | 3.23    | 3.37    | 2.94    | 4.24    | 3.88    | 2.88    | 2.91    | 11.10   | 2.89    | 3.94    | 3.12    | 3.31                   | 3.76                   | 2.82                   | 8.89    | 6.13    | 6.15    | 2.78    | 11.54   | 9.20    |
| Rel. Inten.(% of BP)   | 1.57   | 2.37   | 1.74    | 1.26    | 1.08    | 28.00   | 29.16   | 25.50   | 36.73   | 33.80   | 24.96   | 25.20   | 96.16   | 25.02   | 34.14   | 27.05   | 28.72                  | 32.59                  | 24.46                  | 77.06   | 53.11   | 53.32   | 24.10   | 100.00  | 79.71   |
| Score                  |        | 0.22   | 0.50    | 0.20    |         | -0.28   | 0.75    | -0.25   | 1.50    | -0.34   | 1.50    | -0.25   | 1.50    | 0.50    | -0.34   | -0.27   | -0.29                  | 0.50                   | -0.24                  | 1.50    | 0.50    | 1.50    | 0.50    | 1.50    | 1.50    |
| Ion-type               |        | QK     | L1      | QK      | QKR     | QKR     | PV      | Y2      | Y2      | Y2      | Y2      | Y2      | Y2      | Y2      | Y2      | Y2      | Y2                     | Y2                     | Y2                     | Y2      | Y2      | Y2      | Y2      | Y2      | Y2      |
| Delta ppm              |        | 4.3    | -26.1   | -15.9   |         |         | -9.4    |         | 5.0     |         | 1.2     |         | -14.8   | -1.5    |         |         |                        | -10.8                  |                        | 5.2     | -27.1   | -12.8   | -10.8   | -13.8   |         |

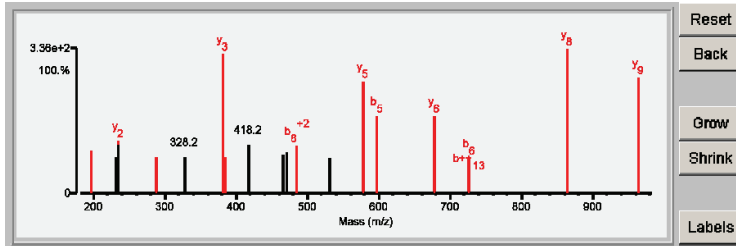

Result Summary

| Rank | Score | SPI (%) | BCS | # Unmatched Ions | # Variable sites | Sequence                        | MH <sup>+</sup> Calculated (Da) | MH <sup>+</sup> Error (Da) | MH <sup>+</sup> Error (ppm) | Protein MW/pl (Da) | Species | Accession # | Protein Name                                                 |
|------|-------|---------|-----|------------------|------------------|---------------------------------|---------------------------------|----------------------------|-----------------------------|--------------------|---------|-------------|--------------------------------------------------------------|
| 1    | 15.00 | 70.7    | 11  | 8/25             | K140k            | (K)F <b>F</b> EEVILIDPFHkAIR(R) | 1845.0422                       | 114.0520                   | 4.6                         | 24146.2/11.62      | HUMAN   | P61313      | 60S ribosomal protein L15 OS=Homo sapiens GN=RPL15 PE=1 SV=2 |

Detailed Results

| Rank                                                                                                                                                                                                                                                                                                                                                                                                                                                                                                                                                                                                                                                                                                                                                                                                                                                                                                                                                                                                                                                                                                                                                                                                                                                                                                                                                                                                                                                                                                                                                                                                                                                                                                                                                                                                                                                                                                                                                                                                                                                                                                                                                                                                                                                                                                                                                                                                                                                                                                                     | Score  | SPI (%) | BCS     | # Unmatched Ions | # Variable sites | Sequence                        | MH <sup>+</sup> Calculated (Da) | MH <sup>+</sup> Error (Da) | MH <sup>+</sup> Error (ppm) | Protein MW/pl (Da) | Species | Accession # | MS-Digest Index #     | Protein Name                                                 |                    |         |         |         |         |         |         |                       |         |         |         |         |         |                       |         |         |         |         |         |         |         |         |                       |         |         |         |                         |      |      |      |      |      |      |      |      |      |      |      |      |      |      |      |      |      |      |      |      |      |      |      |      |      |                       |      |       |      |      |       |       |       |       |       |       |       |       |       |       |       |       |       |       |       |       |        |       |       |       |       |       |      |      |      |      |       |      |      |      |      |      |       |      |       |       |      |       |      |       |      |       |      |      |       |      |      |          |    |    |   |    |    |    |    |    |      |    |      |    |  |  |      |  |    |  |      |  |    |  |       |    |    |           |       |      |      |       |     |       |      |      |       |      |  |  |  |  |       |  |       |  |       |  |     |  |       |      |       |
|--------------------------------------------------------------------------------------------------------------------------------------------------------------------------------------------------------------------------------------------------------------------------------------------------------------------------------------------------------------------------------------------------------------------------------------------------------------------------------------------------------------------------------------------------------------------------------------------------------------------------------------------------------------------------------------------------------------------------------------------------------------------------------------------------------------------------------------------------------------------------------------------------------------------------------------------------------------------------------------------------------------------------------------------------------------------------------------------------------------------------------------------------------------------------------------------------------------------------------------------------------------------------------------------------------------------------------------------------------------------------------------------------------------------------------------------------------------------------------------------------------------------------------------------------------------------------------------------------------------------------------------------------------------------------------------------------------------------------------------------------------------------------------------------------------------------------------------------------------------------------------------------------------------------------------------------------------------------------------------------------------------------------------------------------------------------------------------------------------------------------------------------------------------------------------------------------------------------------------------------------------------------------------------------------------------------------------------------------------------------------------------------------------------------------------------------------------------------------------------------------------------------------|--------|---------|---------|------------------|------------------|---------------------------------|---------------------------------|----------------------------|-----------------------------|--------------------|---------|-------------|-----------------------|--------------------------------------------------------------|--------------------|---------|---------|---------|---------|---------|---------|-----------------------|---------|---------|---------|---------|---------|-----------------------|---------|---------|---------|---------|---------|---------|---------|---------|-----------------------|---------|---------|---------|-------------------------|------|------|------|------|------|------|------|------|------|------|------|------|------|------|------|------|------|------|------|------|------|------|------|------|------|-----------------------|------|-------|------|------|-------|-------|-------|-------|-------|-------|-------|-------|-------|-------|-------|-------|-------|-------|-------|-------|--------|-------|-------|-------|-------|-------|------|------|------|------|-------|------|------|------|------|------|-------|------|-------|-------|------|-------|------|-------|------|-------|------|------|-------|------|------|----------|----|----|---|----|----|----|----|----|------|----|------|----|--|--|------|--|----|--|------|--|----|--|-------|----|----|-----------|-------|------|------|-------|-----|-------|------|------|-------|------|--|--|--|--|-------|--|-------|--|-------|--|-----|--|-------|------|-------|
| 1                                                                                                                                                                                                                                                                                                                                                                                                                                                                                                                                                                                                                                                                                                                                                                                                                                                                                                                                                                                                                                                                                                                                                                                                                                                                                                                                                                                                                                                                                                                                                                                                                                                                                                                                                                                                                                                                                                                                                                                                                                                                                                                                                                                                                                                                                                                                                                                                                                                                                                                        | 15.00  | 70.7    | 11      | 8/25             | K140k            | (K)F <b>F</b> EEVILIDPFHkAIR(R) | 1845.0422                       | 114.0520                   | 4.6                         | 24146.2/11.62      | HUMAN   | P61313      | 590423                | 60S ribosomal protein L15 OS=Homo sapiens GN=RPL15 PE=1 SV=2 |                    |         |         |         |         |         |         |                       |         |         |         |         |         |                       |         |         |         |         |         |         |         |         |                       |         |         |         |                         |      |      |      |      |      |      |      |      |      |      |      |      |      |      |      |      |      |      |      |      |      |      |      |      |      |                       |      |       |      |      |       |       |       |       |       |       |       |       |       |       |       |       |       |       |       |       |        |       |       |       |       |       |      |      |      |      |       |      |      |      |      |      |       |      |       |       |      |       |      |       |      |       |      |      |       |      |      |          |    |    |   |    |    |    |    |    |      |    |      |    |  |  |      |  |    |  |      |  |    |  |       |    |    |           |       |      |      |       |     |       |      |      |       |      |  |  |  |  |       |  |       |  |       |  |     |  |       |      |       |
| <table border="1"> <thead> <tr> <th>Fragment-ion (m/z)</th> <th>70.064</th> <th>86.096</th> <th>110.074</th> <th>120.078</th> <th>121.081</th> <th>175.121</th> <th>267.141</th> <th>295.144</th> <th>359.237</th> <th>369.708</th> <th>370.225</th> <th>424.187</th> <th>434.775<sup>+2</sup></th> <th>435.271</th> <th>443.244</th> <th>498.945</th> <th>523.245</th> <th>537.267</th> <th>549.290</th> <th>599.302</th> <th>601.380</th> <th>605.831<sup>+3</sup></th> <th>662.365</th> <th>738.448</th> <th>982.538</th> </tr> </thead> <tbody> <tr> <td>Frac. Inten. (% of TIC)</td> <td>0.01</td> <td>1.30</td> <td>0.18</td> <td>0.68</td> <td>3.25</td> <td>4.84</td> <td>8.28</td> <td>4.42</td> <td>3.56</td> <td>5.96</td> <td>3.75</td> <td>6.98</td> <td>3.52</td> <td>4.35</td> <td>3.73</td> <td>3.65</td> <td>3.61</td> <td>3.50</td> <td>6.17</td> <td>3.51</td> <td>8.56</td> <td>3.73</td> <td>3.03</td> <td>5.02</td> <td>4.43</td> </tr> <tr> <td>Rel. Inten. (% of BP)</td> <td>0.11</td> <td>15.14</td> <td>2.09</td> <td>7.94</td> <td>37.96</td> <td>56.49</td> <td>96.68</td> <td>51.59</td> <td>41.63</td> <td>69.57</td> <td>43.81</td> <td>81.47</td> <td>41.13</td> <td>50.84</td> <td>43.61</td> <td>42.62</td> <td>42.17</td> <td>40.83</td> <td>72.10</td> <td>40.98</td> <td>100.00</td> <td>43.61</td> <td>35.33</td> <td>58.57</td> <td>51.68</td> </tr> <tr> <td>Score</td> <td>0.20</td> <td>0.22</td> <td>1.00</td> <td>1.00</td> <td>-0.38</td> <td>1.50</td> <td>0.50</td> <td>0.50</td> <td>1.50</td> <td>1.50</td> <td>-0.44</td> <td>0.50</td> <td>-0.41</td> <td>-0.51</td> <td>1.50</td> <td>-0.43</td> <td>0.50</td> <td>-0.41</td> <td>1.50</td> <td>-0.41</td> <td>1.50</td> <td>1.50</td> <td>-0.44</td> <td>1.50</td> <td>1.50</td> </tr> <tr> <td>Ion-type</td> <td>PR</td> <td>LI</td> <td>H</td> <td>a1</td> <td>y1</td> <td>a2</td> <td>b2</td> <td>y3</td> <td>y++5</td> <td>b3</td> <td>y++6</td> <td>b3</td> <td></td> <td></td> <td>y++6</td> <td></td> <td>b4</td> <td></td> <td>y++8</td> <td></td> <td>y4</td> <td></td> <td>y++10</td> <td>y5</td> <td>y7</td> </tr> <tr> <td>Delta ppm</td> <td>-13.2</td> <td>-6.1</td> <td>20.2</td> <td>-29.8</td> <td>9.4</td> <td>-33.3</td> <td>-4.7</td> <td>-7.9</td> <td>-37.3</td> <td>-3.1</td> <td></td> <td></td> <td></td> <td></td> <td>-28.0</td> <td></td> <td>-20.7</td> <td></td> <td>-11.0</td> <td></td> <td>3.1</td> <td></td> <td>-23.0</td> <td>15.4</td> <td>-20.9</td> </tr> </tbody> </table> |        |         |         |                  |                  |                                 |                                 |                            |                             |                    |         |             |                       |                                                              | Fragment-ion (m/z) | 70.064  | 86.096  | 110.074 | 120.078 | 121.081 | 175.121 | 267.141               | 295.144 | 359.237 | 369.708 | 370.225 | 424.187 | 434.775 <sup>+2</sup> | 435.271 | 443.244 | 498.945 | 523.245 | 537.267 | 549.290 | 599.302 | 601.380 | 605.831 <sup>+3</sup> | 662.365 | 738.448 | 982.538 | Frac. Inten. (% of TIC) | 0.01 | 1.30 | 0.18 | 0.68 | 3.25 | 4.84 | 8.28 | 4.42 | 3.56 | 5.96 | 3.75 | 6.98 | 3.52 | 4.35 | 3.73 | 3.65 | 3.61 | 3.50 | 6.17 | 3.51 | 8.56 | 3.73 | 3.03 | 5.02 | 4.43 | Rel. Inten. (% of BP) | 0.11 | 15.14 | 2.09 | 7.94 | 37.96 | 56.49 | 96.68 | 51.59 | 41.63 | 69.57 | 43.81 | 81.47 | 41.13 | 50.84 | 43.61 | 42.62 | 42.17 | 40.83 | 72.10 | 40.98 | 100.00 | 43.61 | 35.33 | 58.57 | 51.68 | Score | 0.20 | 0.22 | 1.00 | 1.00 | -0.38 | 1.50 | 0.50 | 0.50 | 1.50 | 1.50 | -0.44 | 0.50 | -0.41 | -0.51 | 1.50 | -0.43 | 0.50 | -0.41 | 1.50 | -0.41 | 1.50 | 1.50 | -0.44 | 1.50 | 1.50 | Ion-type | PR | LI | H | a1 | y1 | a2 | b2 | y3 | y++5 | b3 | y++6 | b3 |  |  | y++6 |  | b4 |  | y++8 |  | y4 |  | y++10 | y5 | y7 | Delta ppm | -13.2 | -6.1 | 20.2 | -29.8 | 9.4 | -33.3 | -4.7 | -7.9 | -37.3 | -3.1 |  |  |  |  | -28.0 |  | -20.7 |  | -11.0 |  | 3.1 |  | -23.0 | 15.4 | -20.9 |
| Fragment-ion (m/z)                                                                                                                                                                                                                                                                                                                                                                                                                                                                                                                                                                                                                                                                                                                                                                                                                                                                                                                                                                                                                                                                                                                                                                                                                                                                                                                                                                                                                                                                                                                                                                                                                                                                                                                                                                                                                                                                                                                                                                                                                                                                                                                                                                                                                                                                                                                                                                                                                                                                                                       | 70.064 | 86.096  | 110.074 | 120.078          | 121.081          | 175.121                         | 267.141                         | 295.144                    | 359.237                     | 369.708            | 370.225 | 424.187     | 434.775 <sup>+2</sup> | 435.271                                                      | 443.244            | 498.945 | 523.245 | 537.267 | 549.290 | 599.302 | 601.380 | 605.831 <sup>+3</sup> | 662.365 | 738.448 | 982.538 |         |         |                       |         |         |         |         |         |         |         |         |                       |         |         |         |                         |      |      |      |      |      |      |      |      |      |      |      |      |      |      |      |      |      |      |      |      |      |      |      |      |      |                       |      |       |      |      |       |       |       |       |       |       |       |       |       |       |       |       |       |       |       |       |        |       |       |       |       |       |      |      |      |      |       |      |      |      |      |      |       |      |       |       |      |       |      |       |      |       |      |      |       |      |      |          |    |    |   |    |    |    |    |    |      |    |      |    |  |  |      |  |    |  |      |  |    |  |       |    |    |           |       |      |      |       |     |       |      |      |       |      |  |  |  |  |       |  |       |  |       |  |     |  |       |      |       |
| Frac. Inten. (% of TIC)                                                                                                                                                                                                                                                                                                                                                                                                                                                                                                                                                                                                                                                                                                                                                                                                                                                                                                                                                                                                                                                                                                                                                                                                                                                                                                                                                                                                                                                                                                                                                                                                                                                                                                                                                                                                                                                                                                                                                                                                                                                                                                                                                                                                                                                                                                                                                                                                                                                                                                  | 0.01   | 1.30    | 0.18    | 0.68             | 3.25             | 4.84                            | 8.28                            | 4.42                       | 3.56                        | 5.96               | 3.75    | 6.98        | 3.52                  | 4.35                                                         | 3.73               | 3.65    | 3.61    | 3.50    | 6.17    | 3.51    | 8.56    | 3.73                  | 3.03    | 5.02    | 4.43    |         |         |                       |         |         |         |         |         |         |         |         |                       |         |         |         |                         |      |      |      |      |      |      |      |      |      |      |      |      |      |      |      |      |      |      |      |      |      |      |      |      |      |                       |      |       |      |      |       |       |       |       |       |       |       |       |       |       |       |       |       |       |       |       |        |       |       |       |       |       |      |      |      |      |       |      |      |      |      |      |       |      |       |       |      |       |      |       |      |       |      |      |       |      |      |          |    |    |   |    |    |    |    |    |      |    |      |    |  |  |      |  |    |  |      |  |    |  |       |    |    |           |       |      |      |       |     |       |      |      |       |      |  |  |  |  |       |  |       |  |       |  |     |  |       |      |       |
| Rel. Inten. (% of BP)                                                                                                                                                                                                                                                                                                                                                                                                                                                                                                                                                                                                                                                                                                                                                                                                                                                                                                                                                                                                                                                                                                                                                                                                                                                                                                                                                                                                                                                                                                                                                                                                                                                                                                                                                                                                                                                                                                                                                                                                                                                                                                                                                                                                                                                                                                                                                                                                                                                                                                    | 0.11   | 15.14   | 2.09    | 7.94             | 37.96            | 56.49                           | 96.68                           | 51.59                      | 41.63                       | 69.57              | 43.81   | 81.47       | 41.13                 | 50.84                                                        | 43.61              | 42.62   | 42.17   | 40.83   | 72.10   | 40.98   | 100.00  | 43.61                 | 35.33   | 58.57   | 51.68   |         |         |                       |         |         |         |         |         |         |         |         |                       |         |         |         |                         |      |      |      |      |      |      |      |      |      |      |      |      |      |      |      |      |      |      |      |      |      |      |      |      |      |                       |      |       |      |      |       |       |       |       |       |       |       |       |       |       |       |       |       |       |       |       |        |       |       |       |       |       |      |      |      |      |       |      |      |      |      |      |       |      |       |       |      |       |      |       |      |       |      |      |       |      |      |          |    |    |   |    |    |    |    |    |      |    |      |    |  |  |      |  |    |  |      |  |    |  |       |    |    |           |       |      |      |       |     |       |      |      |       |      |  |  |  |  |       |  |       |  |       |  |     |  |       |      |       |
| Score                                                                                                                                                                                                                                                                                                                                                                                                                                                                                                                                                                                                                                                                                                                                                                                                                                                                                                                                                                                                                                                                                                                                                                                                                                                                                                                                                                                                                                                                                                                                                                                                                                                                                                                                                                                                                                                                                                                                                                                                                                                                                                                                                                                                                                                                                                                                                                                                                                                                                                                    | 0.20   | 0.22    | 1.00    | 1.00             | -0.38            | 1.50                            | 0.50                            | 0.50                       | 1.50                        | 1.50               | -0.44   | 0.50        | -0.41                 | -0.51                                                        | 1.50               | -0.43   | 0.50    | -0.41   | 1.50    | -0.41   | 1.50    | 1.50                  | -0.44   | 1.50    | 1.50    |         |         |                       |         |         |         |         |         |         |         |         |                       |         |         |         |                         |      |      |      |      |      |      |      |      |      |      |      |      |      |      |      |      |      |      |      |      |      |      |      |      |      |                       |      |       |      |      |       |       |       |       |       |       |       |       |       |       |       |       |       |       |       |       |        |       |       |       |       |       |      |      |      |      |       |      |      |      |      |      |       |      |       |       |      |       |      |       |      |       |      |      |       |      |      |          |    |    |   |    |    |    |    |    |      |    |      |    |  |  |      |  |    |  |      |  |    |  |       |    |    |           |       |      |      |       |     |       |      |      |       |      |  |  |  |  |       |  |       |  |       |  |     |  |       |      |       |
| Ion-type                                                                                                                                                                                                                                                                                                                                                                                                                                                                                                                                                                                                                                                                                                                                                                                                                                                                                                                                                                                                                                                                                                                                                                                                                                                                                                                                                                                                                                                                                                                                                                                                                                                                                                                                                                                                                                                                                                                                                                                                                                                                                                                                                                                                                                                                                                                                                                                                                                                                                                                 | PR     | LI      | H       | a1               | y1               | a2                              | b2                              | y3                         | y++5                        | b3                 | y++6    | b3          |                       |                                                              | y++6               |         | b4      |         | y++8    |         | y4      |                       | y++10   | y5      | y7      |         |         |                       |         |         |         |         |         |         |         |         |                       |         |         |         |                         |      |      |      |      |      |      |      |      |      |      |      |      |      |      |      |      |      |      |      |      |      |      |      |      |      |                       |      |       |      |      |       |       |       |       |       |       |       |       |       |       |       |       |       |       |       |       |        |       |       |       |       |       |      |      |      |      |       |      |      |      |      |      |       |      |       |       |      |       |      |       |      |       |      |      |       |      |      |          |    |    |   |    |    |    |    |    |      |    |      |    |  |  |      |  |    |  |      |  |    |  |       |    |    |           |       |      |      |       |     |       |      |      |       |      |  |  |  |  |       |  |       |  |       |  |     |  |       |      |       |
| Delta ppm                                                                                                                                                                                                                                                                                                                                                                                                                                                                                                                                                                                                                                                                                                                                                                                                                                                                                                                                                                                                                                                                                                                                                                                                                                                                                                                                                                                                                                                                                                                                                                                                                                                                                                                                                                                                                                                                                                                                                                                                                                                                                                                                                                                                                                                                                                                                                                                                                                                                                                                | -13.2  | -6.1    | 20.2    | -29.8            | 9.4              | -33.3                           | -4.7                            | -7.9                       | -37.3                       | -3.1               |         |             |                       |                                                              | -28.0              |         | -20.7   |         | -11.0   |         | 3.1     |                       | -23.0   | 15.4    | -20.9   |         |         |                       |         |         |         |         |         |         |         |         |                       |         |         |         |                         |      |      |      |      |      |      |      |      |      |      |      |      |      |      |      |      |      |      |      |      |      |      |      |      |      |                       |      |       |      |      |       |       |       |       |       |       |       |       |       |       |       |       |       |       |       |       |        |       |       |       |       |       |      |      |      |      |       |      |      |      |      |      |       |      |       |       |      |       |      |       |      |       |      |      |       |      |      |          |    |    |   |    |    |    |    |    |      |    |      |    |  |  |      |  |    |  |      |  |    |  |       |    |    |           |       |      |      |       |     |       |      |      |       |      |  |  |  |  |       |  |       |  |       |  |     |  |       |      |       |

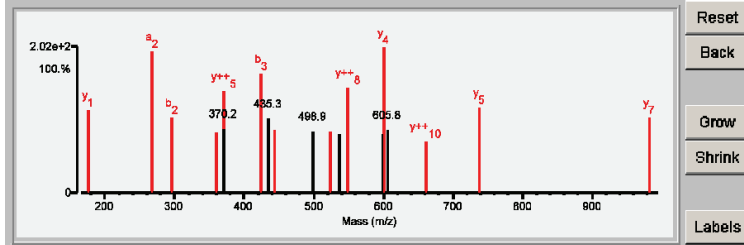



Result Summary

| Rank | Score | SPI (%) | BCS | # Unmatched Ions | Variable sites | Sequence           | MH <sup>+</sup> Calculated (Da) | MH <sup>+</sup> Error (Da) | MH <sup>+</sup> Error (ppm) | Protein MW/PI (Da) | Species | Accession # | Protein Name                                                 |
|------|-------|---------|-----|------------------|----------------|--------------------|---------------------------------|----------------------------|-----------------------------|--------------------|---------|-------------|--------------------------------------------------------------|
| 1    | 10.85 | 63.6    | 6   | 11/25            | K13k           | (R)YSLDPENPTKSK(S) | 1538.7155                       | 114.0567                   | 8.3                         | 21397.2/10.18      | HUMAN   | P18621      | 60S ribosomal protein L17 OS=Homo sapiens GN=RPL17 PE=1 SV=3 |
| 2    | 8.97  | 58.8    | 5   | 12/25            | K16k           | (R)YSLDPENPTKSK(S) | 1538.7155                       | 114.0567                   | 8.3                         | 21397.2/10.18      | HUMAN   | P18621      | 60S ribosomal protein L17 OS=Homo sapiens GN=RPL17 PE=1 SV=3 |

Detailed Results

| Rank                                                                                                                                                                                                                                                                                                                                                                                                                                                                                                                                                                                                                                                                                                                                                                                                                                                                                                                                                                                                                                                                                                                                                                                                                                                                                                                                                                                                                                                                                                                                                                                                                                                                                                                                                                                                                                                                                                                                                                                                                                                                                                                                                                                                                                                                                                                                                                                                                                                                                                                                                        | Score  | SPI (%) | BCS    | # Unmatched Ions | Variable sites | Sequence           | MH <sup>+</sup> Calculated (Da) | MH <sup>+</sup> Error (Da) | MH <sup>+</sup> Error (ppm) | Protein MW/PI (Da) | Species | Accession # | MS-Digest Index # | Protein Name                                                 |                    |         |         |         |                       |                       |                       |                       |         |         |         |         |         |         |         |         |         |         |         |                       |                       |                       |                       |         |         |         |                         |      |      |      |      |      |      |      |      |      |      |      |      |      |      |      |      |      |      |       |       |      |      |      |      |      |                       |      |       |      |      |      |       |       |       |       |       |       |       |       |       |       |       |       |       |       |        |       |       |       |       |       |       |      |       |      |      |      |       |       |       |       |       |      |       |       |      |      |       |       |      |      |      |      |       |      |      |      |          |  |  |    |    |    |  |  |  |  |  |    |  |  |     |    |  |  |      |                      |                  |                   |  |    |    |    |           |  |      |  |      |  |       |  |  |  |  |       |  |  |       |       |  |  |     |       |      |      |  |      |      |       |
|-------------------------------------------------------------------------------------------------------------------------------------------------------------------------------------------------------------------------------------------------------------------------------------------------------------------------------------------------------------------------------------------------------------------------------------------------------------------------------------------------------------------------------------------------------------------------------------------------------------------------------------------------------------------------------------------------------------------------------------------------------------------------------------------------------------------------------------------------------------------------------------------------------------------------------------------------------------------------------------------------------------------------------------------------------------------------------------------------------------------------------------------------------------------------------------------------------------------------------------------------------------------------------------------------------------------------------------------------------------------------------------------------------------------------------------------------------------------------------------------------------------------------------------------------------------------------------------------------------------------------------------------------------------------------------------------------------------------------------------------------------------------------------------------------------------------------------------------------------------------------------------------------------------------------------------------------------------------------------------------------------------------------------------------------------------------------------------------------------------------------------------------------------------------------------------------------------------------------------------------------------------------------------------------------------------------------------------------------------------------------------------------------------------------------------------------------------------------------------------------------------------------------------------------------------------|--------|---------|--------|------------------|----------------|--------------------|---------------------------------|----------------------------|-----------------------------|--------------------|---------|-------------|-------------------|--------------------------------------------------------------|--------------------|---------|---------|---------|-----------------------|-----------------------|-----------------------|-----------------------|---------|---------|---------|---------|---------|---------|---------|---------|---------|---------|---------|-----------------------|-----------------------|-----------------------|-----------------------|---------|---------|---------|-------------------------|------|------|------|------|------|------|------|------|------|------|------|------|------|------|------|------|------|------|-------|-------|------|------|------|------|------|-----------------------|------|-------|------|------|------|-------|-------|-------|-------|-------|-------|-------|-------|-------|-------|-------|-------|-------|-------|--------|-------|-------|-------|-------|-------|-------|------|-------|------|------|------|-------|-------|-------|-------|-------|------|-------|-------|------|------|-------|-------|------|------|------|------|-------|------|------|------|----------|--|--|----|----|----|--|--|--|--|--|----|--|--|-----|----|--|--|------|----------------------|------------------|-------------------|--|----|----|----|-----------|--|------|--|------|--|-------|--|--|--|--|-------|--|--|-------|-------|--|--|-----|-------|------|------|--|------|------|-------|
| 1                                                                                                                                                                                                                                                                                                                                                                                                                                                                                                                                                                                                                                                                                                                                                                                                                                                                                                                                                                                                                                                                                                                                                                                                                                                                                                                                                                                                                                                                                                                                                                                                                                                                                                                                                                                                                                                                                                                                                                                                                                                                                                                                                                                                                                                                                                                                                                                                                                                                                                                                                           | 10.85  | 63.6    | 6      | 11/25            | K13k           | (R)YSLDPENPTKSK(S) | 1538.7155                       | 114.0567                   | 8.3                         | 21397.2/10.18      | HUMAN   | P18621      | 593383            | 60S ribosomal protein L17 OS=Homo sapiens GN=RPL17 PE=1 SV=3 |                    |         |         |         |                       |                       |                       |                       |         |         |         |         |         |         |         |         |         |         |         |                       |                       |                       |                       |         |         |         |                         |      |      |      |      |      |      |      |      |      |      |      |      |      |      |      |      |      |      |       |       |      |      |      |      |      |                       |      |       |      |      |      |       |       |       |       |       |       |       |       |       |       |       |       |       |       |        |       |       |       |       |       |       |      |       |      |      |      |       |       |       |       |       |      |       |       |      |      |       |       |      |      |      |      |       |      |      |      |          |  |  |    |    |    |  |  |  |  |  |    |  |  |     |    |  |  |      |                      |                  |                   |  |    |    |    |           |  |      |  |      |  |       |  |  |  |  |       |  |  |       |       |  |  |     |       |      |      |  |      |      |       |
| <table border="1"> <thead> <tr> <th>Fragment-ion (m/z)</th> <th>70.064</th> <th>72.077</th> <th>86.093</th> <th>87.055</th> <th>136.075</th> <th>137.075</th> <th>148.038</th> <th>185.114</th> <th>189.086</th> <th>201.111</th> <th>223.104</th> <th>309.188</th> <th>327.152</th> <th>341.140</th> <th>394.167</th> <th>410.200</th> <th>443.219</th> <th>455.215</th> <th>579.252<sup>+2</sup></th> <th>587.779<sup>+2</sup></th> <th>645.289<sup>+2</sup></th> <th>719.315<sup>+2</sup></th> <th>737.380</th> <th>834.407</th> <th>948.441</th> </tr> </thead> <tbody> <tr> <td>Frac. Inten. (% of TIC)</td> <td>0.01</td> <td>3.97</td> <td>0.32</td> <td>0.11</td> <td>0.42</td> <td>3.59</td> <td>2.80</td> <td>3.60</td> <td>2.70</td> <td>2.68</td> <td>8.08</td> <td>2.67</td> <td>2.67</td> <td>4.13</td> <td>4.80</td> <td>3.40</td> <td>5.38</td> <td>3.87</td> <td>10.31</td> <td>12.53</td> <td>5.59</td> <td>2.96</td> <td>3.08</td> <td>7.01</td> <td>3.32</td> </tr> <tr> <td>Rel. Inten. (% of BP)</td> <td>0.07</td> <td>31.66</td> <td>2.56</td> <td>0.89</td> <td>3.36</td> <td>28.66</td> <td>22.36</td> <td>28.74</td> <td>21.54</td> <td>21.41</td> <td>64.47</td> <td>21.30</td> <td>21.30</td> <td>32.97</td> <td>38.34</td> <td>27.11</td> <td>42.98</td> <td>30.92</td> <td>82.27</td> <td>100.00</td> <td>44.59</td> <td>23.62</td> <td>24.63</td> <td>55.96</td> <td>26.53</td> </tr> <tr> <td>Score</td> <td>0.20</td> <td>-0.32</td> <td>0.22</td> <td>0.33</td> <td>1.00</td> <td>-0.29</td> <td>-0.22</td> <td>-0.29</td> <td>-0.22</td> <td>-0.21</td> <td>0.50</td> <td>-0.21</td> <td>-0.21</td> <td>0.75</td> <td>1.50</td> <td>-0.27</td> <td>-0.43</td> <td>0.75</td> <td>0.50</td> <td>1.50</td> <td>1.50</td> <td>-0.24</td> <td>1.50</td> <td>1.50</td> <td>1.50</td> </tr> <tr> <td>Ion-type</td> <td></td> <td></td> <td>LI</td> <td>NR</td> <td>a1</td> <td></td> <td></td> <td></td> <td></td> <td></td> <td>a2</td> <td></td> <td></td> <td>ENP</td> <td>y3</td> <td></td> <td></td> <td>LDPE</td> <td>y9-NH3<sup>+2</sup></td> <td>y9<sup>+2</sup></td> <td>y10<sup>+2</sup></td> <td></td> <td>y5</td> <td>y6</td> <td>y7</td> </tr> <tr> <td>Delta ppm</td> <td></td> <td>-8.9</td> <td></td> <td>-9.1</td> <td></td> <td>-10.9</td> <td></td> <td></td> <td></td> <td></td> <td>-19.8</td> <td></td> <td></td> <td>-18.1</td> <td>-22.0</td> <td></td> <td></td> <td>0.6</td> <td>-24.7</td> <td>-1.0</td> <td>-7.1</td> <td></td> <td>25.4</td> <td>-8.5</td> <td>-16.5</td> </tr> </tbody> </table> |        |         |        |                  |                |                    |                                 |                            |                             |                    |         |             |                   |                                                              | Fragment-ion (m/z) | 70.064  | 72.077  | 86.093  | 87.055                | 136.075               | 137.075               | 148.038               | 185.114 | 189.086 | 201.111 | 223.104 | 309.188 | 327.152 | 341.140 | 394.167 | 410.200 | 443.219 | 455.215 | 579.252 <sup>+2</sup> | 587.779 <sup>+2</sup> | 645.289 <sup>+2</sup> | 719.315 <sup>+2</sup> | 737.380 | 834.407 | 948.441 | Frac. Inten. (% of TIC) | 0.01 | 3.97 | 0.32 | 0.11 | 0.42 | 3.59 | 2.80 | 3.60 | 2.70 | 2.68 | 8.08 | 2.67 | 2.67 | 4.13 | 4.80 | 3.40 | 5.38 | 3.87 | 10.31 | 12.53 | 5.59 | 2.96 | 3.08 | 7.01 | 3.32 | Rel. Inten. (% of BP) | 0.07 | 31.66 | 2.56 | 0.89 | 3.36 | 28.66 | 22.36 | 28.74 | 21.54 | 21.41 | 64.47 | 21.30 | 21.30 | 32.97 | 38.34 | 27.11 | 42.98 | 30.92 | 82.27 | 100.00 | 44.59 | 23.62 | 24.63 | 55.96 | 26.53 | Score | 0.20 | -0.32 | 0.22 | 0.33 | 1.00 | -0.29 | -0.22 | -0.29 | -0.22 | -0.21 | 0.50 | -0.21 | -0.21 | 0.75 | 1.50 | -0.27 | -0.43 | 0.75 | 0.50 | 1.50 | 1.50 | -0.24 | 1.50 | 1.50 | 1.50 | Ion-type |  |  | LI | NR | a1 |  |  |  |  |  | a2 |  |  | ENP | y3 |  |  | LDPE | y9-NH3 <sup>+2</sup> | y9 <sup>+2</sup> | y10 <sup>+2</sup> |  | y5 | y6 | y7 | Delta ppm |  | -8.9 |  | -9.1 |  | -10.9 |  |  |  |  | -19.8 |  |  | -18.1 | -22.0 |  |  | 0.6 | -24.7 | -1.0 | -7.1 |  | 25.4 | -8.5 | -16.5 |
| Fragment-ion (m/z)                                                                                                                                                                                                                                                                                                                                                                                                                                                                                                                                                                                                                                                                                                                                                                                                                                                                                                                                                                                                                                                                                                                                                                                                                                                                                                                                                                                                                                                                                                                                                                                                                                                                                                                                                                                                                                                                                                                                                                                                                                                                                                                                                                                                                                                                                                                                                                                                                                                                                                                                          | 70.064 | 72.077  | 86.093 | 87.055           | 136.075        | 137.075            | 148.038                         | 185.114                    | 189.086                     | 201.111            | 223.104 | 309.188     | 327.152           | 341.140                                                      | 394.167            | 410.200 | 443.219 | 455.215 | 579.252 <sup>+2</sup> | 587.779 <sup>+2</sup> | 645.289 <sup>+2</sup> | 719.315 <sup>+2</sup> | 737.380 | 834.407 | 948.441 |         |         |         |         |         |         |         |         |                       |                       |                       |                       |         |         |         |                         |      |      |      |      |      |      |      |      |      |      |      |      |      |      |      |      |      |      |       |       |      |      |      |      |      |                       |      |       |      |      |      |       |       |       |       |       |       |       |       |       |       |       |       |       |       |        |       |       |       |       |       |       |      |       |      |      |      |       |       |       |       |       |      |       |       |      |      |       |       |      |      |      |      |       |      |      |      |          |  |  |    |    |    |  |  |  |  |  |    |  |  |     |    |  |  |      |                      |                  |                   |  |    |    |    |           |  |      |  |      |  |       |  |  |  |  |       |  |  |       |       |  |  |     |       |      |      |  |      |      |       |
| Frac. Inten. (% of TIC)                                                                                                                                                                                                                                                                                                                                                                                                                                                                                                                                                                                                                                                                                                                                                                                                                                                                                                                                                                                                                                                                                                                                                                                                                                                                                                                                                                                                                                                                                                                                                                                                                                                                                                                                                                                                                                                                                                                                                                                                                                                                                                                                                                                                                                                                                                                                                                                                                                                                                                                                     | 0.01   | 3.97    | 0.32   | 0.11             | 0.42           | 3.59               | 2.80                            | 3.60                       | 2.70                        | 2.68               | 8.08    | 2.67        | 2.67              | 4.13                                                         | 4.80               | 3.40    | 5.38    | 3.87    | 10.31                 | 12.53                 | 5.59                  | 2.96                  | 3.08    | 7.01    | 3.32    |         |         |         |         |         |         |         |         |                       |                       |                       |                       |         |         |         |                         |      |      |      |      |      |      |      |      |      |      |      |      |      |      |      |      |      |      |       |       |      |      |      |      |      |                       |      |       |      |      |      |       |       |       |       |       |       |       |       |       |       |       |       |       |       |        |       |       |       |       |       |       |      |       |      |      |      |       |       |       |       |       |      |       |       |      |      |       |       |      |      |      |      |       |      |      |      |          |  |  |    |    |    |  |  |  |  |  |    |  |  |     |    |  |  |      |                      |                  |                   |  |    |    |    |           |  |      |  |      |  |       |  |  |  |  |       |  |  |       |       |  |  |     |       |      |      |  |      |      |       |
| Rel. Inten. (% of BP)                                                                                                                                                                                                                                                                                                                                                                                                                                                                                                                                                                                                                                                                                                                                                                                                                                                                                                                                                                                                                                                                                                                                                                                                                                                                                                                                                                                                                                                                                                                                                                                                                                                                                                                                                                                                                                                                                                                                                                                                                                                                                                                                                                                                                                                                                                                                                                                                                                                                                                                                       | 0.07   | 31.66   | 2.56   | 0.89             | 3.36           | 28.66              | 22.36                           | 28.74                      | 21.54                       | 21.41              | 64.47   | 21.30       | 21.30             | 32.97                                                        | 38.34              | 27.11   | 42.98   | 30.92   | 82.27                 | 100.00                | 44.59                 | 23.62                 | 24.63   | 55.96   | 26.53   |         |         |         |         |         |         |         |         |                       |                       |                       |                       |         |         |         |                         |      |      |      |      |      |      |      |      |      |      |      |      |      |      |      |      |      |      |       |       |      |      |      |      |      |                       |      |       |      |      |      |       |       |       |       |       |       |       |       |       |       |       |       |       |       |        |       |       |       |       |       |       |      |       |      |      |      |       |       |       |       |       |      |       |       |      |      |       |       |      |      |      |      |       |      |      |      |          |  |  |    |    |    |  |  |  |  |  |    |  |  |     |    |  |  |      |                      |                  |                   |  |    |    |    |           |  |      |  |      |  |       |  |  |  |  |       |  |  |       |       |  |  |     |       |      |      |  |      |      |       |
| Score                                                                                                                                                                                                                                                                                                                                                                                                                                                                                                                                                                                                                                                                                                                                                                                                                                                                                                                                                                                                                                                                                                                                                                                                                                                                                                                                                                                                                                                                                                                                                                                                                                                                                                                                                                                                                                                                                                                                                                                                                                                                                                                                                                                                                                                                                                                                                                                                                                                                                                                                                       | 0.20   | -0.32   | 0.22   | 0.33             | 1.00           | -0.29              | -0.22                           | -0.29                      | -0.22                       | -0.21              | 0.50    | -0.21       | -0.21             | 0.75                                                         | 1.50               | -0.27   | -0.43   | 0.75    | 0.50                  | 1.50                  | 1.50                  | -0.24                 | 1.50    | 1.50    | 1.50    |         |         |         |         |         |         |         |         |                       |                       |                       |                       |         |         |         |                         |      |      |      |      |      |      |      |      |      |      |      |      |      |      |      |      |      |      |       |       |      |      |      |      |      |                       |      |       |      |      |      |       |       |       |       |       |       |       |       |       |       |       |       |       |       |        |       |       |       |       |       |       |      |       |      |      |      |       |       |       |       |       |      |       |       |      |      |       |       |      |      |      |      |       |      |      |      |          |  |  |    |    |    |  |  |  |  |  |    |  |  |     |    |  |  |      |                      |                  |                   |  |    |    |    |           |  |      |  |      |  |       |  |  |  |  |       |  |  |       |       |  |  |     |       |      |      |  |      |      |       |
| Ion-type                                                                                                                                                                                                                                                                                                                                                                                                                                                                                                                                                                                                                                                                                                                                                                                                                                                                                                                                                                                                                                                                                                                                                                                                                                                                                                                                                                                                                                                                                                                                                                                                                                                                                                                                                                                                                                                                                                                                                                                                                                                                                                                                                                                                                                                                                                                                                                                                                                                                                                                                                    |        |         | LI     | NR               | a1             |                    |                                 |                            |                             |                    | a2      |             |                   | ENP                                                          | y3                 |         |         | LDPE    | y9-NH3 <sup>+2</sup>  | y9 <sup>+2</sup>      | y10 <sup>+2</sup>     |                       | y5      | y6      | y7      |         |         |         |         |         |         |         |         |                       |                       |                       |                       |         |         |         |                         |      |      |      |      |      |      |      |      |      |      |      |      |      |      |      |      |      |      |       |       |      |      |      |      |      |                       |      |       |      |      |      |       |       |       |       |       |       |       |       |       |       |       |       |       |       |        |       |       |       |       |       |       |      |       |      |      |      |       |       |       |       |       |      |       |       |      |      |       |       |      |      |      |      |       |      |      |      |          |  |  |    |    |    |  |  |  |  |  |    |  |  |     |    |  |  |      |                      |                  |                   |  |    |    |    |           |  |      |  |      |  |       |  |  |  |  |       |  |  |       |       |  |  |     |       |      |      |  |      |      |       |
| Delta ppm                                                                                                                                                                                                                                                                                                                                                                                                                                                                                                                                                                                                                                                                                                                                                                                                                                                                                                                                                                                                                                                                                                                                                                                                                                                                                                                                                                                                                                                                                                                                                                                                                                                                                                                                                                                                                                                                                                                                                                                                                                                                                                                                                                                                                                                                                                                                                                                                                                                                                                                                                   |        | -8.9    |        | -9.1             |                | -10.9              |                                 |                            |                             |                    | -19.8   |             |                   | -18.1                                                        | -22.0              |         |         | 0.6     | -24.7                 | -1.0                  | -7.1                  |                       | 25.4    | -8.5    | -16.5   |         |         |         |         |         |         |         |         |                       |                       |                       |                       |         |         |         |                         |      |      |      |      |      |      |      |      |      |      |      |      |      |      |      |      |      |      |       |       |      |      |      |      |      |                       |      |       |      |      |      |       |       |       |       |       |       |       |       |       |       |       |       |       |       |        |       |       |       |       |       |       |      |       |      |      |      |       |       |       |       |       |      |       |       |      |      |       |       |      |      |      |      |       |      |      |      |          |  |  |    |    |    |  |  |  |  |  |    |  |  |     |    |  |  |      |                      |                  |                   |  |    |    |    |           |  |      |  |      |  |       |  |  |  |  |       |  |  |       |       |  |  |     |       |      |      |  |      |      |       |

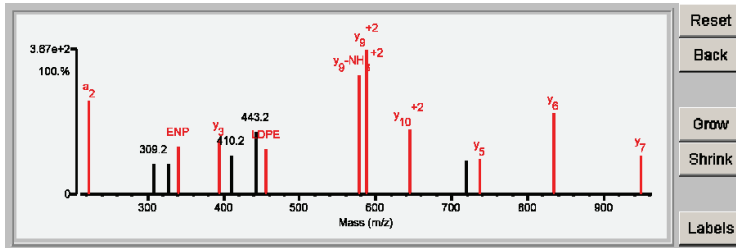

Reset

Back

Grow

Shrink

Labels

Result Summary

| Rank | Score | SPI (%) | BCS | # Unmatched Ions | Variable sites | Sequence                | MH <sup>+</sup> Calculated (Da) | MH <sup>+</sup> Error (Da) | MH <sup>+</sup> Error (ppm) | Protein MW/pi (Da) | Species | Accession # | Protein Name                                                 |
|------|-------|---------|-----|------------------|----------------|-------------------------|---------------------------------|----------------------------|-----------------------------|--------------------|---------|-------------|--------------------------------------------------------------|
| 1    | 15.94 | 87.0    | 11  | 4/25             | K119k          | (R)AGGKILTFDQLALDSPK(G) | 1773.9745                       | 114.0475                   | 2.4                         | 21634.6/11.73      | HUMAN   | Q07020      | 60S ribosomal protein L18 OS=Homo sapiens GN=RPL18 PE=1 SV=2 |

Detailed Results

| Rank                    | Score  | SPI (%) | BCS    | # Unmatched Ions | Variable sites | Sequence                                   | MH <sup>+</sup> Calculated (Da) | MH <sup>+</sup> Error (Da) | MH <sup>+</sup> Error (ppm) | Protein MW/pi (Da) | Species | Accession #                      | MS-Digest Index # | Protein Name                                                 |                |                |                                  |                |                |                                  |                |                |                |                 |          |
|-------------------------|--------|---------|--------|------------------|----------------|--------------------------------------------|---------------------------------|----------------------------|-----------------------------|--------------------|---------|----------------------------------|-------------------|--------------------------------------------------------------|----------------|----------------|----------------------------------|----------------|----------------|----------------------------------|----------------|----------------|----------------|-----------------|----------|
| 1                       | 15.94  | 87.0    | 11     | 4/25             | K119k          | (R)A G\G k\I L\T\F/D Q\I L A/L/D/S/P K (G) | 1773.9745                       | 114.0475                   | 2.4                         | 21634.6/11.73      | HUMAN   | Q07020                           | 594913            | 60S ribosomal protein L18 OS=Homo sapiens GN=RPL18 PE=1 SV=2 |                |                |                                  |                |                |                                  |                |                |                |                 |          |
| Fragment-ion (m/z)      | 70.065 | 84.080  | 86.096 | 101.069          | 120.079        | 129.063                                    | 221.128                         | 244.093                    | 244.165                     | 331.192            | 364.147 | 413.257                          | 425.272           | 428.223                                                      | 446.228        | 508.280        | 541.305                          | 559.311        | 654.386        | 737.424                          | 743.429        | 755.439        | 854.532        | 986.511         | 1145.590 |
| Frac. Inten. (% of TIC) | 0.00   | 0.45    | 0.62   | 0.13             | 0.42           | 3.19                                       | 4.09                            | 3.99                       | 7.00                        | 5.16               | 4.64    | 3.22                             | 3.10              | 5.52                                                         | 3.64           | 2.87           | 6.47                             | 7.49           | 5.84           | 3.60                             | 9.15           | 6.40           | 3.50           | 6.47            | 3.05     |
| Rel. Inten. (% of BP)   | 0.03   | 4.93    | 6.78   | 1.39             | 4.55           | 34.86                                      | 44.72                           | 43.64                      | 76.53                       | 56.36              | 50.71   | 35.25                            | 33.88             | 60.34                                                        | 39.85          | 31.41          | 70.68                            | 81.87          | 63.82          | 39.36                            | 100.00         | 69.95          | 38.23          | 70.70           | 33.40    |
| Score                   | 0.20   | 0.50    | 0.22   | 0.50             | 1.00           | 0.50                                       | -0.45                           | 0.75                       | 1.50                        | 1.50               | 0.75    | 0.75                             | -0.34             | 0.75                                                         | 1.50           | -0.31          | 0.75                             | 1.50           | 0.50           | 0.25                             | 1.50           | 0.50           | 1.50           | 0.50            | 0.50     |
| Ion-type                | PR     | KQ      | LI     | a <sub>2</sub>   | F              | b <sub>2</sub>                             | DQ                              | y <sub>2</sub>             | y <sub>3</sub>              | TFD                | Gkl     | b <sub>4</sub>                   | y <sub>4</sub>    | b <sub>5</sub>                                               | y <sub>5</sub> | b <sub>6</sub> | b <sub>7</sub> -H <sub>2</sub> O | y <sub>7</sub> | b <sub>7</sub> | y <sub>8</sub> -H <sub>2</sub> O | y <sub>9</sub> | b <sub>9</sub> | y <sub>9</sub> | b <sub>10</sub> |          |
| Delta ppm               | 2.5    | -10.4   | -10.8  | -32.0            | -16.5          | -32.9                                      | -4.9                            | -3.6                       | -16.9                       | -11.0              | 12.8    | -8.0                             | 7.3               | -10.3                                                        | 4.6            | -12.1          | -9.6                             | -0.6           | -3.7           |                                  |                |                | -4.5           | -5.5            |          |
|                         |        |         |        | KQ               |                | QKR                                        |                                 |                            |                             |                    |         | y <sub>4</sub> -H <sub>2</sub> O |                   |                                                              |                |                |                                  |                |                | y <sub>5</sub> -H <sub>2</sub> O |                |                |                |                 |          |
|                         |        |         |        |                  |                |                                            |                                 |                            |                             |                    |         | 20.8                             |                   |                                                              |                |                |                                  |                |                | 12.5                             |                |                |                |                 |          |
|                         |        |         |        |                  |                |                                            |                                 |                            |                             |                    |         | DQLA                             |                   |                                                              |                |                |                                  |                |                | QLALD                            |                |                |                |                 |          |
|                         |        |         |        |                  |                |                                            |                                 |                            |                             |                    |         | 18.3                             |                   |                                                              |                |                |                                  |                |                | 10.5                             |                |                |                |                 |          |

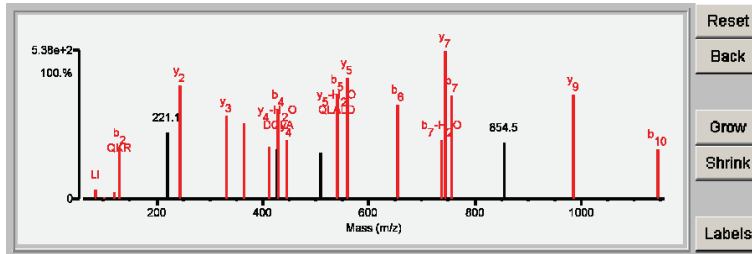

Result Summary

| Rank | Score | SPI (%) | BCS | # Unmatched Ions | Variable sites | Sequence                        | MH <sup>+</sup> Calculated (Da) | MH <sup>+</sup> Error (Da) | MH <sup>+</sup> Error (ppm) | Protein MW/pi (Da) | Species | Accession #            | Protein Name                                                   |
|------|-------|---------|-----|------------------|----------------|---------------------------------|---------------------------------|----------------------------|-----------------------------|--------------------|---------|------------------------|----------------------------------------------------------------|
| 1    | 15.72 | 79.4    | 8   | 5/25             | K152k          | (R) <u>LAPDYDALDVANKIGI</u> (-) | 1800.9742                       | 114.0563                   | 7.0                         | 17695.1/10.44      | HUMAN   | <a href="#">P62750</a> | 60S ribosomal protein L23a OS=Homo sapiens GN=RPL23A PE=1 SV=1 |

Detailed Results

| Rank                                                                                                                                                                                                                                                                                                                                                                                                                                                                                                                                                                                                                                                                                                                                                                                                                                                                                                                                                                                                                                                                                                                                                                                                                                                                                                                                                                                                                                                                                                                                                                                                                                                                                                                                                                                                                                                                                                                                                                                                                                                                                                                                                                                                                                                                                                                                                                                                                                                                                                                                                                                                                                                                                                                                                                                                                                                                                                                                                                                                                                                                                                                              | Score  | SPI (%) | BCS     | # Unmatched Ions | Variable sites | Sequence                                            | MH <sup>+</sup> Calculated (Da) | MH <sup>+</sup> Error (Da) | MH <sup>+</sup> Error (ppm) | Protein MW/pi (Da) | Species | Accession #            | MS-Digest Index #      | Protein Name                                                   |                    |         |         |         |                   |                       |         |                       |         |          |          |         |         |         |         |         |         |         |         |         |                       |         |                       |         |          |          |                        |      |      |      |      |      |      |      |      |      |      |      |      |      |      |      |      |      |      |      |       |      |      |      |      |      |                      |      |       |       |       |       |       |       |       |       |       |       |       |       |       |       |       |       |       |       |        |       |       |       |       |       |       |      |      |      |      |      |      |      |      |      |      |      |      |      |      |      |      |       |       |      |      |       |       |       |      |      |          |    |    |    |    |    |    |    |     |      |      |      |       |    |        |    |    |    |    |                   |  |  |  |    |     |  |           |      |       |       |       |       |       |     |       |     |      |      |       |  |      |      |      |  |  |     |      |  |  |      |      |  |  |  |    |  |  |  |  |  |  |  |  |  |  |        |  |         |  |  |  |  |  |  |  |  |  |  |  |  |  |  |  |  |  |  |  |  |  |  |  |  |  |  |  |  |  |  |  |  |  |  |  |  |
|-----------------------------------------------------------------------------------------------------------------------------------------------------------------------------------------------------------------------------------------------------------------------------------------------------------------------------------------------------------------------------------------------------------------------------------------------------------------------------------------------------------------------------------------------------------------------------------------------------------------------------------------------------------------------------------------------------------------------------------------------------------------------------------------------------------------------------------------------------------------------------------------------------------------------------------------------------------------------------------------------------------------------------------------------------------------------------------------------------------------------------------------------------------------------------------------------------------------------------------------------------------------------------------------------------------------------------------------------------------------------------------------------------------------------------------------------------------------------------------------------------------------------------------------------------------------------------------------------------------------------------------------------------------------------------------------------------------------------------------------------------------------------------------------------------------------------------------------------------------------------------------------------------------------------------------------------------------------------------------------------------------------------------------------------------------------------------------------------------------------------------------------------------------------------------------------------------------------------------------------------------------------------------------------------------------------------------------------------------------------------------------------------------------------------------------------------------------------------------------------------------------------------------------------------------------------------------------------------------------------------------------------------------------------------------------------------------------------------------------------------------------------------------------------------------------------------------------------------------------------------------------------------------------------------------------------------------------------------------------------------------------------------------------------------------------------------------------------------------------------------------------|--------|---------|---------|------------------|----------------|-----------------------------------------------------|---------------------------------|----------------------------|-----------------------------|--------------------|---------|------------------------|------------------------|----------------------------------------------------------------|--------------------|---------|---------|---------|-------------------|-----------------------|---------|-----------------------|---------|----------|----------|---------|---------|---------|---------|---------|---------|---------|---------|---------|-----------------------|---------|-----------------------|---------|----------|----------|------------------------|------|------|------|------|------|------|------|------|------|------|------|------|------|------|------|------|------|------|------|-------|------|------|------|------|------|----------------------|------|-------|-------|-------|-------|-------|-------|-------|-------|-------|-------|-------|-------|-------|-------|-------|-------|-------|-------|--------|-------|-------|-------|-------|-------|-------|------|------|------|------|------|------|------|------|------|------|------|------|------|------|------|------|-------|-------|------|------|-------|-------|-------|------|------|----------|----|----|----|----|----|----|----|-----|------|------|------|-------|----|--------|----|----|----|----|-------------------|--|--|--|----|-----|--|-----------|------|-------|-------|-------|-------|-------|-----|-------|-----|------|------|-------|--|------|------|------|--|--|-----|------|--|--|------|------|--|--|--|----|--|--|--|--|--|--|--|--|--|--|--------|--|---------|--|--|--|--|--|--|--|--|--|--|--|--|--|--|--|--|--|--|--|--|--|--|--|--|--|--|--|--|--|--|--|--|--|--|--|--|
| 1                                                                                                                                                                                                                                                                                                                                                                                                                                                                                                                                                                                                                                                                                                                                                                                                                                                                                                                                                                                                                                                                                                                                                                                                                                                                                                                                                                                                                                                                                                                                                                                                                                                                                                                                                                                                                                                                                                                                                                                                                                                                                                                                                                                                                                                                                                                                                                                                                                                                                                                                                                                                                                                                                                                                                                                                                                                                                                                                                                                                                                                                                                                                 | 15.72  | 79.4    | 8       | 5/25             | K152k          | (R) L A / P D Y D \A L D V \A / N K / I G / I I (-) | 1800.9742                       | 114.0563                   | 7.0                         | 17695.1/10.44      | HUMAN   | <a href="#">P62750</a> | <a href="#">603145</a> | 60S ribosomal protein L23a OS=Homo sapiens GN=RPL23A PE=1 SV=1 |                    |         |         |         |                   |                       |         |                       |         |          |          |         |         |         |         |         |         |         |         |         |                       |         |                       |         |          |          |                        |      |      |      |      |      |      |      |      |      |      |      |      |      |      |      |      |      |      |      |       |      |      |      |      |      |                      |      |       |       |       |       |       |       |       |       |       |       |       |       |       |       |       |       |       |       |        |       |       |       |       |       |       |      |      |      |      |      |      |      |      |      |      |      |      |      |      |      |      |       |       |      |      |       |       |       |      |      |          |    |    |    |    |    |    |    |     |      |      |      |       |    |        |    |    |    |    |                   |  |  |  |    |     |  |           |      |       |       |       |       |       |     |       |     |      |      |       |  |      |      |      |  |  |     |      |  |  |      |      |  |  |  |    |  |  |  |  |  |  |  |  |  |  |        |  |         |  |  |  |  |  |  |  |  |  |  |  |  |  |  |  |  |  |  |  |  |  |  |  |  |  |  |  |  |  |  |  |  |  |  |  |  |
| <table border="1"> <thead> <tr> <th>Fragment-ion (m/z)</th> <th>70.066</th> <th>86.096</th> <th>157.132</th> <th>171.112</th> <th>213.085</th> <th>245.179</th> <th>415.293</th> <th>428.217</th> <th>491.180</th> <th>526.341</th> <th>541.307</th> <th>640.371</th> <th>675.295</th> <th>711.418</th> <th>746.333</th> <th>771.467</th> <th>790.327</th> <th>843.513</th> <th>859.421</th> <th>865.945<sup>+2</sup></th> <th>889.393</th> <th>922.432<sup>+2</sup></th> <th>924.629</th> <th>1056.599</th> <th>1073.511</th> </tr> </thead> <tbody> <tr> <td>Frac. Inten.(% of TIC)</td> <td>0.00</td> <td>4.12</td> <td>2.29</td> <td>3.40</td> <td>3.40</td> <td>2.49</td> <td>3.51</td> <td>2.95</td> <td>5.73</td> <td>3.87</td> <td>3.28</td> <td>2.20</td> <td>4.85</td> <td>6.16</td> <td>2.85</td> <td>2.60</td> <td>6.40</td> <td>2.55</td> <td>4.26</td> <td>13.92</td> <td>2.28</td> <td>2.16</td> <td>7.15</td> <td>3.29</td> <td>4.28</td> </tr> <tr> <td>Rel. Inten.(% of BP)</td> <td>0.02</td> <td>29.58</td> <td>16.46</td> <td>24.44</td> <td>24.43</td> <td>17.88</td> <td>25.20</td> <td>21.22</td> <td>41.14</td> <td>27.81</td> <td>23.56</td> <td>15.84</td> <td>34.88</td> <td>44.28</td> <td>20.46</td> <td>18.68</td> <td>46.03</td> <td>18.35</td> <td>30.61</td> <td>100.00</td> <td>16.39</td> <td>15.54</td> <td>51.41</td> <td>23.66</td> <td>30.73</td> </tr> <tr> <td>Score</td> <td>0.20</td> <td>0.50</td> <td>0.50</td> <td>0.75</td> <td>0.75</td> <td>1.50</td> <td>1.50</td> <td>0.75</td> <td>0.75</td> <td>0.75</td> <td>0.75</td> <td>0.75</td> <td>0.75</td> <td>0.75</td> <td>0.75</td> <td>1.50</td> <td>-0.46</td> <td>-0.18</td> <td>0.50</td> <td>1.50</td> <td>-0.16</td> <td>-0.16</td> <td>-0.51</td> <td>1.50</td> <td>0.50</td> </tr> <tr> <td>Ion-type</td> <td>PR</td> <td>a1</td> <td>a2</td> <td>G1</td> <td>PD</td> <td>y2</td> <td>y4</td> <td>ANK</td> <td>PDYD</td> <td>KIGI</td> <td>ANKI</td> <td>NKIGI</td> <td>b6</td> <td>ANKIGI</td> <td>b7</td> <td>y6</td> <td>b8</td> <td>b8</td> <td>y15<sup>+2</sup></td> <td></td> <td></td> <td></td> <td>y9</td> <td>b10</td> <td></td> </tr> <tr> <td>Delta ppm</td> <td>12.5</td> <td>-18.9</td> <td>-15.5</td> <td>-11.1</td> <td>-14.5</td> <td>-27.6</td> <td>2.9</td> <td>-21.3</td> <td>2.9</td> <td>10.0</td> <td>-6.0</td> <td>-12.5</td> <td></td> <td>-7.2</td> <td>-5.4</td> <td>-6.5</td> <td></td> <td></td> <td>0.2</td> <td>-8.1</td> <td></td> <td></td> <td>-5.4</td> <td>-5.1</td> <td></td> </tr> <tr> <td></td> <td></td> <td>LI</td> <td></td> <td>PDYDAL</td> <td></td> <td>APDYDAL</td> <td></td> </tr> <tr> <td></td> </tr> </tbody> </table> |        |         |         |                  |                |                                                     |                                 |                            |                             |                    |         |                        |                        |                                                                | Fragment-ion (m/z) | 70.066  | 86.096  | 157.132 | 171.112           | 213.085               | 245.179 | 415.293               | 428.217 | 491.180  | 526.341  | 541.307 | 640.371 | 675.295 | 711.418 | 746.333 | 771.467 | 790.327 | 843.513 | 859.421 | 865.945 <sup>+2</sup> | 889.393 | 922.432 <sup>+2</sup> | 924.629 | 1056.599 | 1073.511 | Frac. Inten.(% of TIC) | 0.00 | 4.12 | 2.29 | 3.40 | 3.40 | 2.49 | 3.51 | 2.95 | 5.73 | 3.87 | 3.28 | 2.20 | 4.85 | 6.16 | 2.85 | 2.60 | 6.40 | 2.55 | 4.26 | 13.92 | 2.28 | 2.16 | 7.15 | 3.29 | 4.28 | Rel. Inten.(% of BP) | 0.02 | 29.58 | 16.46 | 24.44 | 24.43 | 17.88 | 25.20 | 21.22 | 41.14 | 27.81 | 23.56 | 15.84 | 34.88 | 44.28 | 20.46 | 18.68 | 46.03 | 18.35 | 30.61 | 100.00 | 16.39 | 15.54 | 51.41 | 23.66 | 30.73 | Score | 0.20 | 0.50 | 0.50 | 0.75 | 0.75 | 1.50 | 1.50 | 0.75 | 0.75 | 0.75 | 0.75 | 0.75 | 0.75 | 0.75 | 0.75 | 1.50 | -0.46 | -0.18 | 0.50 | 1.50 | -0.16 | -0.16 | -0.51 | 1.50 | 0.50 | Ion-type | PR | a1 | a2 | G1 | PD | y2 | y4 | ANK | PDYD | KIGI | ANKI | NKIGI | b6 | ANKIGI | b7 | y6 | b8 | b8 | y15 <sup>+2</sup> |  |  |  | y9 | b10 |  | Delta ppm | 12.5 | -18.9 | -15.5 | -11.1 | -14.5 | -27.6 | 2.9 | -21.3 | 2.9 | 10.0 | -6.0 | -12.5 |  | -7.2 | -5.4 | -6.5 |  |  | 0.2 | -8.1 |  |  | -5.4 | -5.1 |  |  |  | LI |  |  |  |  |  |  |  |  |  |  | PDYDAL |  | APDYDAL |  |  |  |  |  |  |  |  |  |  |  |  |  |  |  |  |  |  |  |  |  |  |  |  |  |  |  |  |  |  |  |  |  |  |  |  |
| Fragment-ion (m/z)                                                                                                                                                                                                                                                                                                                                                                                                                                                                                                                                                                                                                                                                                                                                                                                                                                                                                                                                                                                                                                                                                                                                                                                                                                                                                                                                                                                                                                                                                                                                                                                                                                                                                                                                                                                                                                                                                                                                                                                                                                                                                                                                                                                                                                                                                                                                                                                                                                                                                                                                                                                                                                                                                                                                                                                                                                                                                                                                                                                                                                                                                                                | 70.066 | 86.096  | 157.132 | 171.112          | 213.085        | 245.179                                             | 415.293                         | 428.217                    | 491.180                     | 526.341            | 541.307 | 640.371                | 675.295                | 711.418                                                        | 746.333            | 771.467 | 790.327 | 843.513 | 859.421           | 865.945 <sup>+2</sup> | 889.393 | 922.432 <sup>+2</sup> | 924.629 | 1056.599 | 1073.511 |         |         |         |         |         |         |         |         |         |                       |         |                       |         |          |          |                        |      |      |      |      |      |      |      |      |      |      |      |      |      |      |      |      |      |      |      |       |      |      |      |      |      |                      |      |       |       |       |       |       |       |       |       |       |       |       |       |       |       |       |       |       |       |        |       |       |       |       |       |       |      |      |      |      |      |      |      |      |      |      |      |      |      |      |      |      |       |       |      |      |       |       |       |      |      |          |    |    |    |    |    |    |    |     |      |      |      |       |    |        |    |    |    |    |                   |  |  |  |    |     |  |           |      |       |       |       |       |       |     |       |     |      |      |       |  |      |      |      |  |  |     |      |  |  |      |      |  |  |  |    |  |  |  |  |  |  |  |  |  |  |        |  |         |  |  |  |  |  |  |  |  |  |  |  |  |  |  |  |  |  |  |  |  |  |  |  |  |  |  |  |  |  |  |  |  |  |  |  |  |
| Frac. Inten.(% of TIC)                                                                                                                                                                                                                                                                                                                                                                                                                                                                                                                                                                                                                                                                                                                                                                                                                                                                                                                                                                                                                                                                                                                                                                                                                                                                                                                                                                                                                                                                                                                                                                                                                                                                                                                                                                                                                                                                                                                                                                                                                                                                                                                                                                                                                                                                                                                                                                                                                                                                                                                                                                                                                                                                                                                                                                                                                                                                                                                                                                                                                                                                                                            | 0.00   | 4.12    | 2.29    | 3.40             | 3.40           | 2.49                                                | 3.51                            | 2.95                       | 5.73                        | 3.87               | 3.28    | 2.20                   | 4.85                   | 6.16                                                           | 2.85               | 2.60    | 6.40    | 2.55    | 4.26              | 13.92                 | 2.28    | 2.16                  | 7.15    | 3.29     | 4.28     |         |         |         |         |         |         |         |         |         |                       |         |                       |         |          |          |                        |      |      |      |      |      |      |      |      |      |      |      |      |      |      |      |      |      |      |      |       |      |      |      |      |      |                      |      |       |       |       |       |       |       |       |       |       |       |       |       |       |       |       |       |       |       |        |       |       |       |       |       |       |      |      |      |      |      |      |      |      |      |      |      |      |      |      |      |      |       |       |      |      |       |       |       |      |      |          |    |    |    |    |    |    |    |     |      |      |      |       |    |        |    |    |    |    |                   |  |  |  |    |     |  |           |      |       |       |       |       |       |     |       |     |      |      |       |  |      |      |      |  |  |     |      |  |  |      |      |  |  |  |    |  |  |  |  |  |  |  |  |  |  |        |  |         |  |  |  |  |  |  |  |  |  |  |  |  |  |  |  |  |  |  |  |  |  |  |  |  |  |  |  |  |  |  |  |  |  |  |  |  |
| Rel. Inten.(% of BP)                                                                                                                                                                                                                                                                                                                                                                                                                                                                                                                                                                                                                                                                                                                                                                                                                                                                                                                                                                                                                                                                                                                                                                                                                                                                                                                                                                                                                                                                                                                                                                                                                                                                                                                                                                                                                                                                                                                                                                                                                                                                                                                                                                                                                                                                                                                                                                                                                                                                                                                                                                                                                                                                                                                                                                                                                                                                                                                                                                                                                                                                                                              | 0.02   | 29.58   | 16.46   | 24.44            | 24.43          | 17.88                                               | 25.20                           | 21.22                      | 41.14                       | 27.81              | 23.56   | 15.84                  | 34.88                  | 44.28                                                          | 20.46              | 18.68   | 46.03   | 18.35   | 30.61             | 100.00                | 16.39   | 15.54                 | 51.41   | 23.66    | 30.73    |         |         |         |         |         |         |         |         |         |                       |         |                       |         |          |          |                        |      |      |      |      |      |      |      |      |      |      |      |      |      |      |      |      |      |      |      |       |      |      |      |      |      |                      |      |       |       |       |       |       |       |       |       |       |       |       |       |       |       |       |       |       |       |        |       |       |       |       |       |       |      |      |      |      |      |      |      |      |      |      |      |      |      |      |      |      |       |       |      |      |       |       |       |      |      |          |    |    |    |    |    |    |    |     |      |      |      |       |    |        |    |    |    |    |                   |  |  |  |    |     |  |           |      |       |       |       |       |       |     |       |     |      |      |       |  |      |      |      |  |  |     |      |  |  |      |      |  |  |  |    |  |  |  |  |  |  |  |  |  |  |        |  |         |  |  |  |  |  |  |  |  |  |  |  |  |  |  |  |  |  |  |  |  |  |  |  |  |  |  |  |  |  |  |  |  |  |  |  |  |
| Score                                                                                                                                                                                                                                                                                                                                                                                                                                                                                                                                                                                                                                                                                                                                                                                                                                                                                                                                                                                                                                                                                                                                                                                                                                                                                                                                                                                                                                                                                                                                                                                                                                                                                                                                                                                                                                                                                                                                                                                                                                                                                                                                                                                                                                                                                                                                                                                                                                                                                                                                                                                                                                                                                                                                                                                                                                                                                                                                                                                                                                                                                                                             | 0.20   | 0.50    | 0.50    | 0.75             | 0.75           | 1.50                                                | 1.50                            | 0.75                       | 0.75                        | 0.75               | 0.75    | 0.75                   | 0.75                   | 0.75                                                           | 0.75               | 1.50    | -0.46   | -0.18   | 0.50              | 1.50                  | -0.16   | -0.16                 | -0.51   | 1.50     | 0.50     |         |         |         |         |         |         |         |         |         |                       |         |                       |         |          |          |                        |      |      |      |      |      |      |      |      |      |      |      |      |      |      |      |      |      |      |      |       |      |      |      |      |      |                      |      |       |       |       |       |       |       |       |       |       |       |       |       |       |       |       |       |       |       |        |       |       |       |       |       |       |      |      |      |      |      |      |      |      |      |      |      |      |      |      |      |      |       |       |      |      |       |       |       |      |      |          |    |    |    |    |    |    |    |     |      |      |      |       |    |        |    |    |    |    |                   |  |  |  |    |     |  |           |      |       |       |       |       |       |     |       |     |      |      |       |  |      |      |      |  |  |     |      |  |  |      |      |  |  |  |    |  |  |  |  |  |  |  |  |  |  |        |  |         |  |  |  |  |  |  |  |  |  |  |  |  |  |  |  |  |  |  |  |  |  |  |  |  |  |  |  |  |  |  |  |  |  |  |  |  |
| Ion-type                                                                                                                                                                                                                                                                                                                                                                                                                                                                                                                                                                                                                                                                                                                                                                                                                                                                                                                                                                                                                                                                                                                                                                                                                                                                                                                                                                                                                                                                                                                                                                                                                                                                                                                                                                                                                                                                                                                                                                                                                                                                                                                                                                                                                                                                                                                                                                                                                                                                                                                                                                                                                                                                                                                                                                                                                                                                                                                                                                                                                                                                                                                          | PR     | a1      | a2      | G1               | PD             | y2                                                  | y4                              | ANK                        | PDYD                        | KIGI               | ANKI    | NKIGI                  | b6                     | ANKIGI                                                         | b7                 | y6      | b8      | b8      | y15 <sup>+2</sup> |                       |         |                       | y9      | b10      |          |         |         |         |         |         |         |         |         |         |                       |         |                       |         |          |          |                        |      |      |      |      |      |      |      |      |      |      |      |      |      |      |      |      |      |      |      |       |      |      |      |      |      |                      |      |       |       |       |       |       |       |       |       |       |       |       |       |       |       |       |       |       |       |        |       |       |       |       |       |       |      |      |      |      |      |      |      |      |      |      |      |      |      |      |      |      |       |       |      |      |       |       |       |      |      |          |    |    |    |    |    |    |    |     |      |      |      |       |    |        |    |    |    |    |                   |  |  |  |    |     |  |           |      |       |       |       |       |       |     |       |     |      |      |       |  |      |      |      |  |  |     |      |  |  |      |      |  |  |  |    |  |  |  |  |  |  |  |  |  |  |        |  |         |  |  |  |  |  |  |  |  |  |  |  |  |  |  |  |  |  |  |  |  |  |  |  |  |  |  |  |  |  |  |  |  |  |  |  |  |
| Delta ppm                                                                                                                                                                                                                                                                                                                                                                                                                                                                                                                                                                                                                                                                                                                                                                                                                                                                                                                                                                                                                                                                                                                                                                                                                                                                                                                                                                                                                                                                                                                                                                                                                                                                                                                                                                                                                                                                                                                                                                                                                                                                                                                                                                                                                                                                                                                                                                                                                                                                                                                                                                                                                                                                                                                                                                                                                                                                                                                                                                                                                                                                                                                         | 12.5   | -18.9   | -15.5   | -11.1            | -14.5          | -27.6                                               | 2.9                             | -21.3                      | 2.9                         | 10.0               | -6.0    | -12.5                  |                        | -7.2                                                           | -5.4               | -6.5    |         |         | 0.2               | -8.1                  |         |                       | -5.4    | -5.1     |          |         |         |         |         |         |         |         |         |         |                       |         |                       |         |          |          |                        |      |      |      |      |      |      |      |      |      |      |      |      |      |      |      |      |      |      |      |       |      |      |      |      |      |                      |      |       |       |       |       |       |       |       |       |       |       |       |       |       |       |       |       |       |       |        |       |       |       |       |       |       |      |      |      |      |      |      |      |      |      |      |      |      |      |      |      |      |       |       |      |      |       |       |       |      |      |          |    |    |    |    |    |    |    |     |      |      |      |       |    |        |    |    |    |    |                   |  |  |  |    |     |  |           |      |       |       |       |       |       |     |       |     |      |      |       |  |      |      |      |  |  |     |      |  |  |      |      |  |  |  |    |  |  |  |  |  |  |  |  |  |  |        |  |         |  |  |  |  |  |  |  |  |  |  |  |  |  |  |  |  |  |  |  |  |  |  |  |  |  |  |  |  |  |  |  |  |  |  |  |  |
|                                                                                                                                                                                                                                                                                                                                                                                                                                                                                                                                                                                                                                                                                                                                                                                                                                                                                                                                                                                                                                                                                                                                                                                                                                                                                                                                                                                                                                                                                                                                                                                                                                                                                                                                                                                                                                                                                                                                                                                                                                                                                                                                                                                                                                                                                                                                                                                                                                                                                                                                                                                                                                                                                                                                                                                                                                                                                                                                                                                                                                                                                                                                   |        | LI      |         |                  |                |                                                     |                                 |                            |                             |                    |         |                        | PDYDAL                 |                                                                | APDYDAL            |         |         |         |                   |                       |         |                       |         |          |          |         |         |         |         |         |         |         |         |         |                       |         |                       |         |          |          |                        |      |      |      |      |      |      |      |      |      |      |      |      |      |      |      |      |      |      |      |       |      |      |      |      |      |                      |      |       |       |       |       |       |       |       |       |       |       |       |       |       |       |       |       |       |       |        |       |       |       |       |       |       |      |      |      |      |      |      |      |      |      |      |      |      |      |      |      |      |       |       |      |      |       |       |       |      |      |          |    |    |    |    |    |    |    |     |      |      |      |       |    |        |    |    |    |    |                   |  |  |  |    |     |  |           |      |       |       |       |       |       |     |       |     |      |      |       |  |      |      |      |  |  |     |      |  |  |      |      |  |  |  |    |  |  |  |  |  |  |  |  |  |  |        |  |         |  |  |  |  |  |  |  |  |  |  |  |  |  |  |  |  |  |  |  |  |  |  |  |  |  |  |  |  |  |  |  |  |  |  |  |  |
|                                                                                                                                                                                                                                                                                                                                                                                                                                                                                                                                                                                                                                                                                                                                                                                                                                                                                                                                                                                                                                                                                                                                                                                                                                                                                                                                                                                                                                                                                                                                                                                                                                                                                                                                                                                                                                                                                                                                                                                                                                                                                                                                                                                                                                                                                                                                                                                                                                                                                                                                                                                                                                                                                                                                                                                                                                                                                                                                                                                                                                                                                                                                   |        |         |         |                  |                |                                                     |                                 |                            |                             |                    |         |                        |                        |                                                                |                    |         |         |         |                   |                       |         |                       |         |          |          |         |         |         |         |         |         |         |         |         |                       |         |                       |         |          |          |                        |      |      |      |      |      |      |      |      |      |      |      |      |      |      |      |      |      |      |      |       |      |      |      |      |      |                      |      |       |       |       |       |       |       |       |       |       |       |       |       |       |       |       |       |       |       |        |       |       |       |       |       |       |      |      |      |      |      |      |      |      |      |      |      |      |      |      |      |      |       |       |      |      |       |       |       |      |      |          |    |    |    |    |    |    |    |     |      |      |      |       |    |        |    |    |    |    |                   |  |  |  |    |     |  |           |      |       |       |       |       |       |     |       |     |      |      |       |  |      |      |      |  |  |     |      |  |  |      |      |  |  |  |    |  |  |  |  |  |  |  |  |  |  |        |  |         |  |  |  |  |  |  |  |  |  |  |  |  |  |  |  |  |  |  |  |  |  |  |  |  |  |  |  |  |  |  |  |  |  |  |  |  |

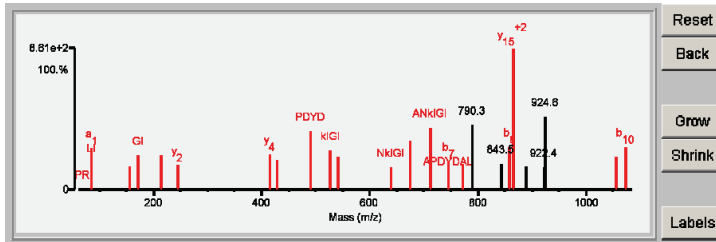

Reset  
Back  
Grow  
Shrink  
Labels

Result Summary

| Rank | Score | SPI (%) | BCS | # Unmatched Ions | Variable sites | Sequence                 | MH <sup>+</sup> Calculated (Da) | MH <sup>+</sup> Error (Da) | MH <sup>+</sup> Error (ppm) | Protein MW/pi (Da) | Species | Accession # | Protein Name                                                 |
|------|-------|---------|-----|------------------|----------------|--------------------------|---------------------------------|----------------------------|-----------------------------|--------------------|---------|-------------|--------------------------------------------------------------|
| 1    | 15.93 | 68.3    | 7   | 6/24             | K12k           | (K)VELCSFGYkiYPGHGR(R)   | 1969.9589                       | 114.0637                   | 10.0                        | 17779.1/11.26      | HUMAN   | P83731      | 60S ribosomal protein L24 OS=Homo sapiens GN=RPL24 PE=1 SV=1 |
| 2    | 3.39  | 55.5    | 0   | 11/24            | None           | (R)LQAQSDLGPDREVQTVEK(T) | 2084.0618                       | -0.0393                    | -18.8                       | 231619.2/6.57      | HUMAN   | RQ92817     | REVERSE Envoplakin OS=Homo sapiens GN=EVPL PE=1 SV=2         |

Detailed Results

| Rank | Score | SPI (%) | BCS | # Unmatched Ions | Variable sites | Sequence                                               | MH <sup>+</sup> Calculated (Da) | MH <sup>+</sup> Error (Da) | MH <sup>+</sup> Error (ppm) | Protein MW/pi (Da) | Species | Accession # | MS-Digest Index # | Protein Name                                                 |
|------|-------|---------|-----|------------------|----------------|--------------------------------------------------------|---------------------------------|----------------------------|-----------------------------|--------------------|---------|-------------|-------------------|--------------------------------------------------------------|
| 1    | 15.93 | 68.3    | 7   | 6/24             | K12k           | (K)Y E I L C S F S / G Y k / I / Y P / G H / G / R (R) | 1969.9589                       | 114.0637                   | 10.0                        | 17779.1/11.26      | HUMAN   | P83731      | 605091            | 60S ribosomal protein L24 OS=Homo sapiens GN=RPL24 PE=1 SV=1 |

  

| Fragment-Ion (m/z)      | 70.065 | 72.080 | 73.085 | 84.081 | 86.094 | 102.054 | 120.080 | 133.046 | 136.075 | 175.114 | 183.114 | 201.123 | 225.118 | 229.117 | 232.138 | 274.116 | 352.174 | 395.132 | 421.213 <sup>+3</sup> | 426.219 | 524.285 | 619.318 <sup>+3</sup> | 686.340 | 799.417 |
|-------------------------|--------|--------|--------|--------|--------|---------|---------|---------|---------|---------|---------|---------|---------|---------|---------|---------|---------|---------|-----------------------|---------|---------|-----------------------|---------|---------|
| Frac. Inten. (% of TIC) | 0.00   | 0.80   | 4.17   | 20.00  | 0.35   | 0.16    | 0.24    | 4.52    | 0.23    | 2.88    | 3.66    | 9.24    | 3.65    | 7.83    | 4.29    | 3.04    | 4.26    | 2.83    | 3.38                  | 4.21    | 3.89    | 3.06                  | 7.52    | 5.78    |
| Rel. Inten. (% of BP)   | 0.02   | 4.01   | 20.83  | 100.00 | 1.77   | 0.80    | 1.21    | 22.59   | 1.15    | 14.42   | 18.28   | 46.22   | 18.26   | 39.16   | 21.43   | 15.19   | 21.28   | 14.17   | 16.88                 | 21.05   | 19.44   | 15.29                 | 37.62   | 28.90   |
| Score                   | 0.20   | 0.50   | -0.16  | -0.75  | 0.22   | 1.00    | 1.00    | -0.17   | 1.00    | 1.50    | 0.50    | -0.14   | 0.50    | 0.50    | 1.50    | 0.75    | 0.50    | 0.75    | 1.50                  | 1.50    | -0.15   | 1.50                  | 1.50    | 1.50    |
| Ion-type                | PR     | a1     |        |        | LI     | E       | F       | Y       | Y1      | a2      | b2      | y2      | b2      | y2      | LC      | y3-NH3  | CSF     |         | y10 <sup>+3</sup>     | y4      |         | y15 <sup>+3</sup>     | y6      | y7      |
| Delta ppm               | -0.4   | -21.8  | 0.50   |        | -22.4  | -7.4    | -4.0    |         | -8.7    | -30.6   | -6.3    |         | -8.6    | -11.3   | -27.7   | 4.6     | -17.6   |         | -15.0                 | -3.5    |         | 25.6                  | 4.7     | -5.3    |

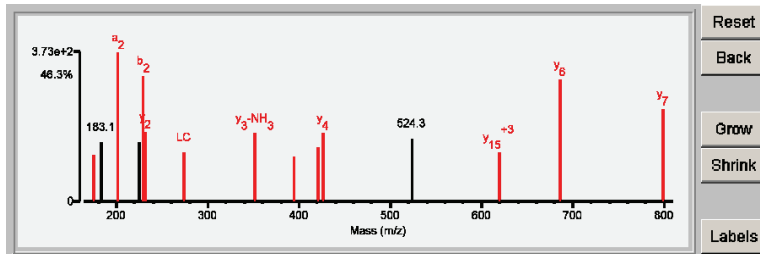

Result Summary

| Rank | Score | SPI (%) | BCS | # Unmatched Ions | Variable sites | Sequence           | MH <sup>+</sup> Calculated (Da) | MH <sup>+</sup> Error (Da) | MH <sup>+</sup> Error (ppm) | Protein MW/pl (Da) | Species | Accession # | Protein Name                                                 |
|------|-------|---------|-----|------------------|----------------|--------------------|---------------------------------|----------------------------|-----------------------------|--------------------|---------|-------------|--------------------------------------------------------------|
| 1    | 10.72 | 66.3    | 5   | 9/24             | K27k           | (R)TDGKVFQFLNAK(C) | 1367.7318                       | 114.0513                   | 5.6                         | 17779.1/11.26      | HUMAN   | P83731      | 60S ribosomal protein L24 OS=Homo sapiens GN=RPL24 PE=1 SV=1 |

Detailed Results

| Rank                        | Score | SPI (%) | BCS    | # Unmatched Ions | Variable sites | Sequence                       | MH <sup>+</sup> Calculated (Da) | MH <sup>+</sup> Error (Da) | MH <sup>+</sup> Error (ppm) | Protein MW/pl (Da) | Species        | Accession #    | MS-Digest Index # | Protein Name                                                 |                                 |                |         |         |         |         |                |                |                |         |         |
|-----------------------------|-------|---------|--------|------------------|----------------|--------------------------------|---------------------------------|----------------------------|-----------------------------|--------------------|----------------|----------------|-------------------|--------------------------------------------------------------|---------------------------------|----------------|---------|---------|---------|---------|----------------|----------------|----------------|---------|---------|
| 1                           | 10.72 | 66.3    | 5      | 9/24             | K27k           | (R)T D G k V\F/Q/F L/N A/K (C) | 1367.7318                       | 114.0513                   | 5.6                         | 17779.1/11.26      | HUMAN          | P83731         | 605091            | 60S ribosomal protein L24 OS=Homo sapiens GN=RPL24 PE=1 SV=1 |                                 |                |         |         |         |         |                |                |                |         |         |
| Fragment-ion (m/z)          |       | 69.040  | 72.079 | 74.059           | 84.080         | 86.095                         | 101.072                         | 120.078                    | 121.087                     | 129.099            | 136.072        | 147.111        | 189.085           | 228.132                                                      | 294.150                         | 305.198        | 315.162 | 332.187 | 340.161 | 398.197 | 445.248        | 592.351        | 615.298        | 704.366 | 720.388 |
| Frac. Inten. (% of TIC)     |       | 3.14    | 0.14   | 23.24            | 1.00           | 0.38                           | 0.17                            | 0.75                       | 3.78                        | 0.14               | 3.00           | 4.22           | 2.99              | 5.81                                                         | 4.14                            | 4.07           | 3.51    | 5.30    | 3.68    | 3.19    | 5.70           | 9.33           | 5.32           | 3.01    | 3.98    |
| Rel. Inten. (% of BP) Score |       | 13.50   | 0.61   | 100.00           | 4.32           | 1.62                           | 0.74                            | 3.24                       | 16.26                       | 0.59               | 12.90          | 18.17          | 12.88             | 25.00                                                        | 17.83                           | 17.52          | 15.09   | 22.82   | 15.82   | 13.73   | 24.54          | 40.13          | 22.88          | 12.94   | 17.14   |
| Ion-type                    |       |         | V      | a <sub>1</sub>   | KQ             | LI                             | KQ                              | F                          |                             | RKQ                | y <sub>1</sub> | a <sub>2</sub> | LN                |                                                              | y <sub>3</sub> -NH <sub>3</sub> | y <sub>3</sub> |         |         |         |         | y <sub>5</sub> | b <sub>5</sub> | y <sub>6</sub> |         |         |
| Delta ppm                   |       |         | -17.7  | -30.2            | -8.0           | -16.6                          |                                 | -19.8                      |                             | -22.8              | -10.2          | -15.8          | -14.8             |                                                              | -13.3                           | -18.2          |         |         |         |         | 9.9            | -20.9          |                |         |         |

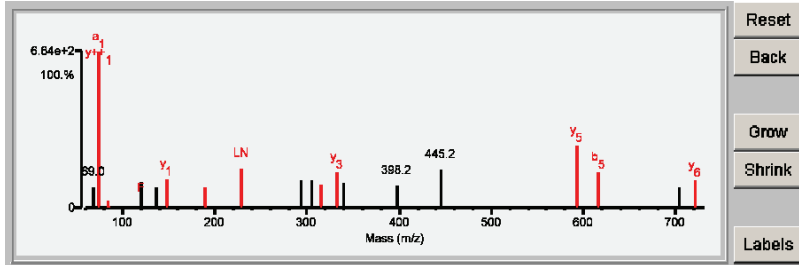

Result Summary

| Rank | Score | SPI (%) | BCS | # Unmatched ions | Variable sites | Sequence             | MH <sup>+</sup> Calculated (Da) | MH <sup>+</sup> Error (Da) | MH <sup>+</sup> Error (ppm) | Protein MW (Da) | Species | Accession # | Protein Name                                                                                          |
|------|-------|---------|-----|------------------|----------------|----------------------|---------------------------------|----------------------------|-----------------------------|-----------------|---------|-------------|-------------------------------------------------------------------------------------------------------|
| 1    | 19.09 | 80.8    | 10  | 8/25             | K93k           | (R)AITGASLADIMAKR(N) | 1417.7832                       | 114.0537                   | 7.0                         | 17779.1/11.26   | HUMAN   | P83731      | 60S ribosomal protein L24 OS=Homo sapiens GN=RPL24 PE=1 SV=1                                          |
| 2    | 7.86  | 63.3    | 5   | 19/25            | M36m K44k      | (K)STmGLIALQAKR(E)   | 1401.8246                       | 130.0122                   | -16.7                       | 83638.4/5.65    | HUMAN   | RQ1L529     | REVERSE LON peptidase N-terminal domain and RING finger protein 2 OS=Homo sapiens GN=LONRF2 PE=2 SV=2 |
| 3    | 6.56  | 52.4    | 2   | 13/25            | K315k          | (R)ALAIIDAASKSMVK(T) | 1417.8083                       | 114.0285                   | -9.4                        | 62184.1/6.58    | HUMAN   | RQ14194     | REVERSE Dihydropyrimidinase-related protein 1 OS=Homo sapiens GN=CRMP1 PE=1 SV=1                      |

Detailed Results

| Rank                                                                                                                                                                                                                                                                                                                                                                                                                                                                                                                                                                                                                                                                                                                                                                                                                                                                                                                                                                                                                                                                                                                                                                                                                                                                                                                                                                                                                                                                                                                                                                                                                                                                                                                                                                                                                                                                                                                                                                                                                                                                                                                                                                                                                                                                                                                                                | Score  | SPI (%) | BCS    | # Unmatched ions | Variable sites | Sequence                           | MH <sup>+</sup> Calculated (Da) | MH <sup>+</sup> Error (Da) | MH <sup>+</sup> Error (ppm) | Protein MW (Da) | Species | Accession # | MS-Digest Index # | Protein Name                                                 |                    |         |         |         |         |         |         |         |         |         |          |         |         |         |         |         |         |         |         |         |         |         |         |         |         |          |                         |      |      |      |      |      |      |       |      |      |      |      |      |      |      |      |      |      |      |      |      |      |      |      |      |      |                       |      |      |      |       |      |      |        |       |       |      |       |       |       |      |      |       |       |       |       |      |       |       |       |       |       |       |       |       |      |       |      |       |      |      |      |      |       |      |      |       |       |      |      |      |      |      |      |       |      |      |      |          |  |  |    |  |       |  |    |    |    |    |     |     |  |  |  |    |    |      |    |      |  |  |    |    |    |    |           |  |  |      |  |       |  |       |       |       |       |       |       |  |  |  |      |       |       |      |     |  |  |     |     |     |      |
|-----------------------------------------------------------------------------------------------------------------------------------------------------------------------------------------------------------------------------------------------------------------------------------------------------------------------------------------------------------------------------------------------------------------------------------------------------------------------------------------------------------------------------------------------------------------------------------------------------------------------------------------------------------------------------------------------------------------------------------------------------------------------------------------------------------------------------------------------------------------------------------------------------------------------------------------------------------------------------------------------------------------------------------------------------------------------------------------------------------------------------------------------------------------------------------------------------------------------------------------------------------------------------------------------------------------------------------------------------------------------------------------------------------------------------------------------------------------------------------------------------------------------------------------------------------------------------------------------------------------------------------------------------------------------------------------------------------------------------------------------------------------------------------------------------------------------------------------------------------------------------------------------------------------------------------------------------------------------------------------------------------------------------------------------------------------------------------------------------------------------------------------------------------------------------------------------------------------------------------------------------------------------------------------------------------------------------------------------------|--------|---------|--------|------------------|----------------|------------------------------------|---------------------------------|----------------------------|-----------------------------|-----------------|---------|-------------|-------------------|--------------------------------------------------------------|--------------------|---------|---------|---------|---------|---------|---------|---------|---------|---------|----------|---------|---------|---------|---------|---------|---------|---------|---------|---------|---------|---------|---------|---------|---------|----------|-------------------------|------|------|------|------|------|------|-------|------|------|------|------|------|------|------|------|------|------|------|------|------|------|------|------|------|------|-----------------------|------|------|------|-------|------|------|--------|-------|-------|------|-------|-------|-------|------|------|-------|-------|-------|-------|------|-------|-------|-------|-------|-------|-------|-------|-------|------|-------|------|-------|------|------|------|------|-------|------|------|-------|-------|------|------|------|------|------|------|-------|------|------|------|----------|--|--|----|--|-------|--|----|----|----|----|-----|-----|--|--|--|----|----|------|----|------|--|--|----|----|----|----|-----------|--|--|------|--|-------|--|-------|-------|-------|-------|-------|-------|--|--|--|------|-------|-------|------|-----|--|--|-----|-----|-----|------|
| 1                                                                                                                                                                                                                                                                                                                                                                                                                                                                                                                                                                                                                                                                                                                                                                                                                                                                                                                                                                                                                                                                                                                                                                                                                                                                                                                                                                                                                                                                                                                                                                                                                                                                                                                                                                                                                                                                                                                                                                                                                                                                                                                                                                                                                                                                                                                                                   | 19.09  | 80.8    | 10     | 8/25             | K93k           | (R)A I T G A S L A D I M A K R (N) | 1417.7832                       | 114.0537                   | 7.0                         | 17779.1/11.26   | HUMAN   | P83731      | 605091            | 60S ribosomal protein L24 OS=Homo sapiens GN=RPL24 PE=1 SV=1 |                    |         |         |         |         |         |         |         |         |         |          |         |         |         |         |         |         |         |         |         |         |         |         |         |         |          |                         |      |      |      |      |      |      |       |      |      |      |      |      |      |      |      |      |      |      |      |      |      |      |      |      |      |                       |      |      |      |       |      |      |        |       |       |      |       |       |       |      |      |       |       |       |       |      |       |       |       |       |       |       |       |       |      |       |      |       |      |      |      |      |       |      |      |       |       |      |      |      |      |      |      |       |      |      |      |          |  |  |    |  |       |  |    |    |    |    |     |     |  |  |  |    |    |      |    |      |  |  |    |    |    |    |           |  |  |      |  |       |  |       |       |       |       |       |       |  |  |  |      |       |       |      |     |  |  |     |     |     |      |
| <table border="1"> <thead> <tr> <th>Fragment-ion (m/z)</th> <th>74.059</th><th>84.082</th><th>86.096</th><th>87.102</th><th>131.080</th><th>141.101</th><th>157.132</th><th>159.076</th><th>175.116</th><th>185.125</th><th>198.095</th><th>209.128</th><th>300.152</th><th>342.190</th><th>412.219</th><th>417.255</th><th>488.289</th><th>595.313</th><th>619.331</th><th>674.358</th><th>674.856</th><th>732.422</th><th>847.448</th><th>918.488</th><th>1031.566</th> </tr> </thead> <tbody> <tr> <td>Frac. Inten. (% of TIC)</td> <td>2.01</td><td>2.10</td><td>0.84</td><td>2.22</td><td>1.87</td><td>2.14</td><td>21.59</td><td>4.32</td><td>3.26</td><td>1.84</td><td>2.22</td><td>2.32</td><td>3.38</td><td>1.88</td><td>1.87</td><td>3.01</td><td>4.59</td><td>2.69</td><td>9.79</td><td>1.80</td><td>4.71</td><td>4.71</td><td>4.98</td><td>6.73</td><td>3.13</td> </tr> <tr> <td>Rel. Inten. (% of BP)</td> <td>9.32</td><td>9.73</td><td>3.89</td><td>10.27</td><td>8.64</td><td>9.90</td><td>100.00</td><td>20.01</td><td>15.09</td><td>8.53</td><td>10.29</td><td>10.74</td><td>15.64</td><td>8.73</td><td>8.67</td><td>13.96</td><td>21.24</td><td>12.47</td><td>45.37</td><td>8.35</td><td>21.82</td><td>21.82</td><td>23.09</td><td>31.20</td><td>14.48</td> </tr> <tr> <td>Score</td> <td>-0.09</td><td>-0.10</td><td>0.22</td><td>-0.10</td><td>0.50</td><td>-0.10</td><td>0.75</td><td>1.50</td><td>0.75</td><td>1.50</td><td>-0.10</td><td>1.50</td><td>0.75</td><td>-0.09</td><td>-0.09</td><td>1.50</td><td>1.50</td><td>1.50</td><td>1.50</td><td>1.50</td><td>1.50</td><td>-0.22</td><td>1.50</td><td>1.50</td><td>1.50</td> </tr> <tr> <td>Ion-type</td> <td></td><td></td><td>LI</td><td></td><td>AS-28</td><td></td><td>a2</td><td>AS</td><td>y1</td><td>b2</td><td>y+2</td><td>ADI</td><td></td><td></td><td></td><td>y2</td><td>y3</td><td>y+10</td><td>y4</td><td>y+12</td><td></td><td></td><td>y5</td><td>y6</td><td>y7</td><td>y8</td> </tr> <tr> <td>Delta ppm</td> <td></td><td></td><td>-3.8</td><td></td><td>-17.6</td><td></td><td>-13.6</td><td>-11.4</td><td>-18.0</td><td>-25.1</td><td>-19.9</td><td>-16.3</td><td></td><td></td><td></td><td>-5.4</td><td>-10.6</td><td>-14.8</td><td>-6.0</td><td>3.1</td><td></td><td></td><td>4.9</td><td>3.2</td><td>5.5</td><td>-0.3</td> </tr> </tbody> </table> |        |         |        |                  |                |                                    |                                 |                            |                             |                 |         |             |                   |                                                              | Fragment-ion (m/z) | 74.059  | 84.082  | 86.096  | 87.102  | 131.080 | 141.101 | 157.132 | 159.076 | 175.116 | 185.125  | 198.095 | 209.128 | 300.152 | 342.190 | 412.219 | 417.255 | 488.289 | 595.313 | 619.331 | 674.358 | 674.856 | 732.422 | 847.448 | 918.488 | 1031.566 | Frac. Inten. (% of TIC) | 2.01 | 2.10 | 0.84 | 2.22 | 1.87 | 2.14 | 21.59 | 4.32 | 3.26 | 1.84 | 2.22 | 2.32 | 3.38 | 1.88 | 1.87 | 3.01 | 4.59 | 2.69 | 9.79 | 1.80 | 4.71 | 4.71 | 4.98 | 6.73 | 3.13 | Rel. Inten. (% of BP) | 9.32 | 9.73 | 3.89 | 10.27 | 8.64 | 9.90 | 100.00 | 20.01 | 15.09 | 8.53 | 10.29 | 10.74 | 15.64 | 8.73 | 8.67 | 13.96 | 21.24 | 12.47 | 45.37 | 8.35 | 21.82 | 21.82 | 23.09 | 31.20 | 14.48 | Score | -0.09 | -0.10 | 0.22 | -0.10 | 0.50 | -0.10 | 0.75 | 1.50 | 0.75 | 1.50 | -0.10 | 1.50 | 0.75 | -0.09 | -0.09 | 1.50 | 1.50 | 1.50 | 1.50 | 1.50 | 1.50 | -0.22 | 1.50 | 1.50 | 1.50 | Ion-type |  |  | LI |  | AS-28 |  | a2 | AS | y1 | b2 | y+2 | ADI |  |  |  | y2 | y3 | y+10 | y4 | y+12 |  |  | y5 | y6 | y7 | y8 | Delta ppm |  |  | -3.8 |  | -17.6 |  | -13.6 | -11.4 | -18.0 | -25.1 | -19.9 | -16.3 |  |  |  | -5.4 | -10.6 | -14.8 | -6.0 | 3.1 |  |  | 4.9 | 3.2 | 5.5 | -0.3 |
| Fragment-ion (m/z)                                                                                                                                                                                                                                                                                                                                                                                                                                                                                                                                                                                                                                                                                                                                                                                                                                                                                                                                                                                                                                                                                                                                                                                                                                                                                                                                                                                                                                                                                                                                                                                                                                                                                                                                                                                                                                                                                                                                                                                                                                                                                                                                                                                                                                                                                                                                  | 74.059 | 84.082  | 86.096 | 87.102           | 131.080        | 141.101                            | 157.132                         | 159.076                    | 175.116                     | 185.125         | 198.095 | 209.128     | 300.152           | 342.190                                                      | 412.219            | 417.255 | 488.289 | 595.313 | 619.331 | 674.358 | 674.856 | 732.422 | 847.448 | 918.488 | 1031.566 |         |         |         |         |         |         |         |         |         |         |         |         |         |         |          |                         |      |      |      |      |      |      |       |      |      |      |      |      |      |      |      |      |      |      |      |      |      |      |      |      |      |                       |      |      |      |       |      |      |        |       |       |      |       |       |       |      |      |       |       |       |       |      |       |       |       |       |       |       |       |       |      |       |      |       |      |      |      |      |       |      |      |       |       |      |      |      |      |      |      |       |      |      |      |          |  |  |    |  |       |  |    |    |    |    |     |     |  |  |  |    |    |      |    |      |  |  |    |    |    |    |           |  |  |      |  |       |  |       |       |       |       |       |       |  |  |  |      |       |       |      |     |  |  |     |     |     |      |
| Frac. Inten. (% of TIC)                                                                                                                                                                                                                                                                                                                                                                                                                                                                                                                                                                                                                                                                                                                                                                                                                                                                                                                                                                                                                                                                                                                                                                                                                                                                                                                                                                                                                                                                                                                                                                                                                                                                                                                                                                                                                                                                                                                                                                                                                                                                                                                                                                                                                                                                                                                             | 2.01   | 2.10    | 0.84   | 2.22             | 1.87           | 2.14                               | 21.59                           | 4.32                       | 3.26                        | 1.84            | 2.22    | 2.32        | 3.38              | 1.88                                                         | 1.87               | 3.01    | 4.59    | 2.69    | 9.79    | 1.80    | 4.71    | 4.71    | 4.98    | 6.73    | 3.13     |         |         |         |         |         |         |         |         |         |         |         |         |         |         |          |                         |      |      |      |      |      |      |       |      |      |      |      |      |      |      |      |      |      |      |      |      |      |      |      |      |      |                       |      |      |      |       |      |      |        |       |       |      |       |       |       |      |      |       |       |       |       |      |       |       |       |       |       |       |       |       |      |       |      |       |      |      |      |      |       |      |      |       |       |      |      |      |      |      |      |       |      |      |      |          |  |  |    |  |       |  |    |    |    |    |     |     |  |  |  |    |    |      |    |      |  |  |    |    |    |    |           |  |  |      |  |       |  |       |       |       |       |       |       |  |  |  |      |       |       |      |     |  |  |     |     |     |      |
| Rel. Inten. (% of BP)                                                                                                                                                                                                                                                                                                                                                                                                                                                                                                                                                                                                                                                                                                                                                                                                                                                                                                                                                                                                                                                                                                                                                                                                                                                                                                                                                                                                                                                                                                                                                                                                                                                                                                                                                                                                                                                                                                                                                                                                                                                                                                                                                                                                                                                                                                                               | 9.32   | 9.73    | 3.89   | 10.27            | 8.64           | 9.90                               | 100.00                          | 20.01                      | 15.09                       | 8.53            | 10.29   | 10.74       | 15.64             | 8.73                                                         | 8.67               | 13.96   | 21.24   | 12.47   | 45.37   | 8.35    | 21.82   | 21.82   | 23.09   | 31.20   | 14.48    |         |         |         |         |         |         |         |         |         |         |         |         |         |         |          |                         |      |      |      |      |      |      |       |      |      |      |      |      |      |      |      |      |      |      |      |      |      |      |      |      |      |                       |      |      |      |       |      |      |        |       |       |      |       |       |       |      |      |       |       |       |       |      |       |       |       |       |       |       |       |       |      |       |      |       |      |      |      |      |       |      |      |       |       |      |      |      |      |      |      |       |      |      |      |          |  |  |    |  |       |  |    |    |    |    |     |     |  |  |  |    |    |      |    |      |  |  |    |    |    |    |           |  |  |      |  |       |  |       |       |       |       |       |       |  |  |  |      |       |       |      |     |  |  |     |     |     |      |
| Score                                                                                                                                                                                                                                                                                                                                                                                                                                                                                                                                                                                                                                                                                                                                                                                                                                                                                                                                                                                                                                                                                                                                                                                                                                                                                                                                                                                                                                                                                                                                                                                                                                                                                                                                                                                                                                                                                                                                                                                                                                                                                                                                                                                                                                                                                                                                               | -0.09  | -0.10   | 0.22   | -0.10            | 0.50           | -0.10                              | 0.75                            | 1.50                       | 0.75                        | 1.50            | -0.10   | 1.50        | 0.75              | -0.09                                                        | -0.09              | 1.50    | 1.50    | 1.50    | 1.50    | 1.50    | 1.50    | -0.22   | 1.50    | 1.50    | 1.50     |         |         |         |         |         |         |         |         |         |         |         |         |         |         |          |                         |      |      |      |      |      |      |       |      |      |      |      |      |      |      |      |      |      |      |      |      |      |      |      |      |      |                       |      |      |      |       |      |      |        |       |       |      |       |       |       |      |      |       |       |       |       |      |       |       |       |       |       |       |       |       |      |       |      |       |      |      |      |      |       |      |      |       |       |      |      |      |      |      |      |       |      |      |      |          |  |  |    |  |       |  |    |    |    |    |     |     |  |  |  |    |    |      |    |      |  |  |    |    |    |    |           |  |  |      |  |       |  |       |       |       |       |       |       |  |  |  |      |       |       |      |     |  |  |     |     |     |      |
| Ion-type                                                                                                                                                                                                                                                                                                                                                                                                                                                                                                                                                                                                                                                                                                                                                                                                                                                                                                                                                                                                                                                                                                                                                                                                                                                                                                                                                                                                                                                                                                                                                                                                                                                                                                                                                                                                                                                                                                                                                                                                                                                                                                                                                                                                                                                                                                                                            |        |         | LI     |                  | AS-28          |                                    | a2                              | AS                         | y1                          | b2              | y+2     | ADI         |                   |                                                              |                    | y2      | y3      | y+10    | y4      | y+12    |         |         | y5      | y6      | y7       | y8      |         |         |         |         |         |         |         |         |         |         |         |         |         |          |                         |      |      |      |      |      |      |       |      |      |      |      |      |      |      |      |      |      |      |      |      |      |      |      |      |      |                       |      |      |      |       |      |      |        |       |       |      |       |       |       |      |      |       |       |       |       |      |       |       |       |       |       |       |       |       |      |       |      |       |      |      |      |      |       |      |      |       |       |      |      |      |      |      |      |       |      |      |      |          |  |  |    |  |       |  |    |    |    |    |     |     |  |  |  |    |    |      |    |      |  |  |    |    |    |    |           |  |  |      |  |       |  |       |       |       |       |       |       |  |  |  |      |       |       |      |     |  |  |     |     |     |      |
| Delta ppm                                                                                                                                                                                                                                                                                                                                                                                                                                                                                                                                                                                                                                                                                                                                                                                                                                                                                                                                                                                                                                                                                                                                                                                                                                                                                                                                                                                                                                                                                                                                                                                                                                                                                                                                                                                                                                                                                                                                                                                                                                                                                                                                                                                                                                                                                                                                           |        |         | -3.8   |                  | -17.6          |                                    | -13.6                           | -11.4                      | -18.0                       | -25.1           | -19.9   | -16.3       |                   |                                                              |                    | -5.4    | -10.6   | -14.8   | -6.0    | 3.1     |         |         | 4.9     | 3.2     | 5.5      | -0.3    |         |         |         |         |         |         |         |         |         |         |         |         |         |          |                         |      |      |      |      |      |      |       |      |      |      |      |      |      |      |      |      |      |      |      |      |      |      |      |      |      |                       |      |      |      |       |      |      |        |       |       |      |       |       |       |      |      |       |       |       |       |      |       |       |       |       |       |       |       |       |      |       |      |       |      |      |      |      |       |      |      |       |       |      |      |      |      |      |      |       |      |      |      |          |  |  |    |  |       |  |    |    |    |    |     |     |  |  |  |    |    |      |    |      |  |  |    |    |    |    |           |  |  |      |  |       |  |       |       |       |       |       |       |  |  |  |      |       |       |      |     |  |  |     |     |     |      |

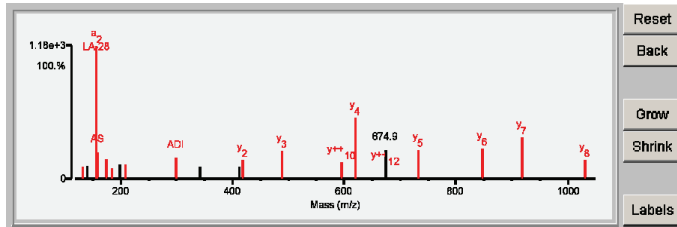

Result Summary

| Rank | Score | SPI (%) | BCS | # Unmatched Ions | Variable sites | Sequence                     | MH <sup>+</sup> Calculated (Da) | MH <sup>+</sup> Error (Da) | MH <sup>+</sup> Error (ppm) | Protein MW/pl (Da) | Species | Accession # | Protein Name                                                         |
|------|-------|---------|-----|------------------|----------------|------------------------------|---------------------------------|----------------------------|-----------------------------|--------------------|---------|-------------|----------------------------------------------------------------------|
| 1    | 13.95 | 81.5    | 5   | 6/25             | K134k          | (K)AKDQTKAQAAAPASVPAQAPK(R)  | 2049.1087                       | 114.0678                   | 11.5                        | 17752.2/11.67      | HUMAN   | P47914      | 60S ribosomal protein L29 OS=Homo sapiens GN=RPL29 PE=1 SV=2         |
| 2    | 13.01 | 77.7    | 5   | 7/25             | K130k          | (K)AKDQTKAQAAAPASVPAQAPK(R)  | 2049.1087                       | 114.0678                   | 11.5                        | 17752.2/11.67      | HUMAN   | P47914      | 60S ribosomal protein L29 OS=Homo sapiens GN=RPL29 PE=1 SV=2         |
| 3    | 7.27  | 58.5    | 2   | 12/25            | K561k          | (R)AASSVPLKKTNAQAAPKPR(K)    | 2049.1563                       | 114.0202                   | -10.5                       | 112212.0/6.93      | HUMAN   | Q66K74      | Microtubule-associated protein 1S OS=Homo sapiens GN=MAP1S PE=1 SV=2 |
| 4    | 4.55  | 60.6    | 2   | 12/25            | K1895k K1901k  | (K)KAPPVTKDPSLAKATPGIK(D)    | 1935.1273                       | 228.0492                   | -16.9                       | 222658.9/6.15      | HUMAN   | Q9JUK3      | CASP8-associated protein 2 OS=Homo sapiens GN=CASP8AP2 PE=1 SV=1     |
| 5    | 3.31  | 56.2    | 1   | 13/25            | None           | (R)KASDERLTVTGGVPASAPPPGR(E) | 2163.1517                       | 0.0249                     | 11.5                        | 122676.5/6.01      | HUMAN   | RQ9ULE0     | REVERSE Protein WWC3 OS=Homo sapiens GN=WWC3 PE=2 SV=3               |

Detailed Results

| Rank                                                                                                                                                                                                                                                                                                                                                                                                                                                                                                                                                                                                                                                                                                                                                                                                                                                                                                                                                                                                                                                                                                                                                                                                                                                                                                                                                                                                                                                                                                                                                                                                                                                                                                                                                                                                                                                                                                                                                                                                                                                                                                                                                                                                                                                                                                                                                                                                                                                                                                                                                                                                                                   | Score  | SPI (%) | BCS    | # Unmatched Ions | Variable sites | Sequence                    | MH <sup>+</sup> Calculated (Da) | MH <sup>+</sup> Error (Da) | MH <sup>+</sup> Error (ppm) | Protein MW/pl (Da)   | Species | Accession # | MS-Digest Index #                | Protein Name                                                 |                              |                |         |         |                |         |                       |                       |                |                               |                       |         |         |         |         |                       |         |         |         |         |         |                       |                       |         |         |                       |                         |      |      |      |      |      |      |      |      |      |      |      |      |      |      |       |      |      |      |      |      |      |      |       |      |      |                       |       |      |      |      |      |      |       |       |       |       |       |       |       |       |       |       |       |       |       |       |       |       |        |       |       |       |       |  |      |      |  |      |      |      |      |      |      |      |      |      |      |      |      |      |      |      |       |       |      |       |      |          |  |    |   |    |  |     |       |    |    |                      |    |     |                                  |  |                              |                |      |     |                |  |  |  |                |                               |           |  |  |     |       |     |  |     |       |       |     |     |      |     |  |      |     |      |      |      |  |  |  |  |      |      |
|----------------------------------------------------------------------------------------------------------------------------------------------------------------------------------------------------------------------------------------------------------------------------------------------------------------------------------------------------------------------------------------------------------------------------------------------------------------------------------------------------------------------------------------------------------------------------------------------------------------------------------------------------------------------------------------------------------------------------------------------------------------------------------------------------------------------------------------------------------------------------------------------------------------------------------------------------------------------------------------------------------------------------------------------------------------------------------------------------------------------------------------------------------------------------------------------------------------------------------------------------------------------------------------------------------------------------------------------------------------------------------------------------------------------------------------------------------------------------------------------------------------------------------------------------------------------------------------------------------------------------------------------------------------------------------------------------------------------------------------------------------------------------------------------------------------------------------------------------------------------------------------------------------------------------------------------------------------------------------------------------------------------------------------------------------------------------------------------------------------------------------------------------------------------------------------------------------------------------------------------------------------------------------------------------------------------------------------------------------------------------------------------------------------------------------------------------------------------------------------------------------------------------------------------------------------------------------------------------------------------------------------|--------|---------|--------|------------------|----------------|-----------------------------|---------------------------------|----------------------------|-----------------------------|----------------------|---------|-------------|----------------------------------|--------------------------------------------------------------|------------------------------|----------------|---------|---------|----------------|---------|-----------------------|-----------------------|----------------|-------------------------------|-----------------------|---------|---------|---------|---------|-----------------------|---------|---------|---------|---------|---------|-----------------------|-----------------------|---------|---------|-----------------------|-------------------------|------|------|------|------|------|------|------|------|------|------|------|------|------|------|-------|------|------|------|------|------|------|------|-------|------|------|-----------------------|-------|------|------|------|------|------|-------|-------|-------|-------|-------|-------|-------|-------|-------|-------|-------|-------|-------|-------|-------|-------|--------|-------|-------|-------|-------|--|------|------|--|------|------|------|------|------|------|------|------|------|------|------|------|------|------|------|-------|-------|------|-------|------|----------|--|----|---|----|--|-----|-------|----|----|----------------------|----|-----|----------------------------------|--|------------------------------|----------------|------|-----|----------------|--|--|--|----------------|-------------------------------|-----------|--|--|-----|-------|-----|--|-----|-------|-------|-----|-----|------|-----|--|------|-----|------|------|------|--|--|--|--|------|------|
| 1                                                                                                                                                                                                                                                                                                                                                                                                                                                                                                                                                                                                                                                                                                                                                                                                                                                                                                                                                                                                                                                                                                                                                                                                                                                                                                                                                                                                                                                                                                                                                                                                                                                                                                                                                                                                                                                                                                                                                                                                                                                                                                                                                                                                                                                                                                                                                                                                                                                                                                                                                                                                                                      | 13.95  | 81.5    | 5      | 6/25             | K134k          | (K)AKDQTKAQAAAPASVPAQAPK(R) | 2049.1087                       | 114.0678                   | 11.5                        | 17752.2/11.67        | HUMAN   | P47914      | 610387                           | 60S ribosomal protein L29 OS=Homo sapiens GN=RPL29 PE=1 SV=2 |                              |                |         |         |                |         |                       |                       |                |                               |                       |         |         |         |         |                       |         |         |         |         |         |                       |                       |         |         |                       |                         |      |      |      |      |      |      |      |      |      |      |      |      |      |      |       |      |      |      |      |      |      |      |       |      |      |                       |       |      |      |      |      |      |       |       |       |       |       |       |       |       |       |       |       |       |       |       |       |       |        |       |       |       |       |  |      |      |  |      |      |      |      |      |      |      |      |      |      |      |      |      |      |      |       |       |      |       |      |          |  |    |   |    |  |     |       |    |    |                      |    |     |                                  |  |                              |                |      |     |                |  |  |  |                |                               |           |  |  |     |       |     |  |     |       |       |     |     |      |     |  |      |     |      |      |      |  |  |  |  |      |      |
| <table border="1"> <thead> <tr> <th>Fragment-Ion (m/z)</th> <th>60.045</th> <th>70.066</th> <th>72.080</th> <th>84.081</th> <th>101.070</th> <th>129.103</th> <th>141.100</th> <th>169.095</th> <th>200.105</th> <th>238.120</th> <th>244.164</th> <th>256.133</th> <th>297.156</th> <th>298.156</th> <th>306.182<sup>+2</sup></th> <th>315.202</th> <th>368.192</th> <th>442.242</th> <th>514.305</th> <th>554.345</th> <th>597.300<sup>+2</sup></th> <th>600.308<sup>+2</sup></th> <th>611.351</th> <th>638.300</th> <th>683.853<sup>+2</sup></th> </tr> </thead> <tbody> <tr> <td>Frac. Inten. (% of TIC)</td> <td>3.44</td> <td>0.02</td> <td>0.61</td> <td>0.34</td> <td>0.09</td> <td>0.19</td> <td>6.55</td> <td>3.14</td> <td>2.49</td> <td>4.50</td> <td>5.25</td> <td>4.31</td> <td>3.46</td> <td>2.62</td> <td>10.12</td> <td>2.65</td> <td>6.60</td> <td>3.80</td> <td>5.10</td> <td>4.22</td> <td>2.53</td> <td>3.15</td> <td>19.46</td> <td>2.51</td> <td>2.85</td> </tr> <tr> <td>Rel. Inten. (% of BP)</td> <td>17.65</td> <td>0.10</td> <td>3.16</td> <td>1.76</td> <td>0.44</td> <td>0.97</td> <td>33.64</td> <td>16.15</td> <td>12.79</td> <td>23.15</td> <td>26.97</td> <td>22.12</td> <td>17.80</td> <td>13.46</td> <td>51.99</td> <td>13.61</td> <td>33.90</td> <td>19.55</td> <td>26.22</td> <td>21.67</td> <td>13.02</td> <td>16.20</td> <td>100.00</td> <td>12.88</td> <td>14.66</td> </tr> <tr> <td>Score</td> <td>-0.18</td> <td></td> <td>0.50</td> <td>0.50</td> <td></td> <td>0.20</td> <td>0.50</td> <td>0.75</td> <td>0.75</td> <td>0.50</td> <td>1.50</td> <td>0.75</td> <td>0.75</td> <td>0.75</td> <td>1.50</td> <td>1.50</td> <td>0.75</td> <td>1.50</td> <td>0.75</td> <td>1.50</td> <td>-0.22</td> <td>-0.13</td> <td>0.50</td> <td>-0.13</td> <td>0.50</td> </tr> <tr> <td>Ion-type</td> <td></td> <td>FR</td> <td>V</td> <td>KQ</td> <td></td> <td>RKQ</td> <td>AP-28</td> <td>AP</td> <td>QA</td> <td>PAS-H<sub>2</sub>O</td> <td>Yz</td> <td>PAS</td> <td>b<sub>3</sub>-H<sub>2</sub>O</td> <td></td> <td>y<sub>6</sub><sup>+2</sup></td> <td>y<sub>3</sub></td> <td>AQAP</td> <td>KAQ</td> <td>y<sub>5</sub></td> <td></td> <td></td> <td></td> <td>y<sub>6</sub></td> <td>b<sub>13</sub><sup>+2</sup></td> </tr> <tr> <td>Delta ppm</td> <td></td> <td></td> <td>5.3</td> <td>-10.8</td> <td>2.7</td> <td></td> <td>6.7</td> <td>-27.2</td> <td>-16.9</td> <td>5.2</td> <td>0.8</td> <td>-7.2</td> <td>9.1</td> <td></td> <td>-4.5</td> <td>8.8</td> <td>-2.2</td> <td>-4.7</td> <td>-0.8</td> <td></td> <td></td> <td></td> <td></td> <td>-0.7</td> <td>-7.6</td> </tr> </tbody> </table> |        |         |        |                  |                |                             |                                 |                            |                             |                      |         |             |                                  |                                                              | Fragment-Ion (m/z)           | 60.045         | 70.066  | 72.080  | 84.081         | 101.070 | 129.103               | 141.100               | 169.095        | 200.105                       | 238.120               | 244.164 | 256.133 | 297.156 | 298.156 | 306.182 <sup>+2</sup> | 315.202 | 368.192 | 442.242 | 514.305 | 554.345 | 597.300 <sup>+2</sup> | 600.308 <sup>+2</sup> | 611.351 | 638.300 | 683.853 <sup>+2</sup> | Frac. Inten. (% of TIC) | 3.44 | 0.02 | 0.61 | 0.34 | 0.09 | 0.19 | 6.55 | 3.14 | 2.49 | 4.50 | 5.25 | 4.31 | 3.46 | 2.62 | 10.12 | 2.65 | 6.60 | 3.80 | 5.10 | 4.22 | 2.53 | 3.15 | 19.46 | 2.51 | 2.85 | Rel. Inten. (% of BP) | 17.65 | 0.10 | 3.16 | 1.76 | 0.44 | 0.97 | 33.64 | 16.15 | 12.79 | 23.15 | 26.97 | 22.12 | 17.80 | 13.46 | 51.99 | 13.61 | 33.90 | 19.55 | 26.22 | 21.67 | 13.02 | 16.20 | 100.00 | 12.88 | 14.66 | Score | -0.18 |  | 0.50 | 0.50 |  | 0.20 | 0.50 | 0.75 | 0.75 | 0.50 | 1.50 | 0.75 | 0.75 | 0.75 | 1.50 | 1.50 | 0.75 | 1.50 | 0.75 | 1.50 | -0.22 | -0.13 | 0.50 | -0.13 | 0.50 | Ion-type |  | FR | V | KQ |  | RKQ | AP-28 | AP | QA | PAS-H <sub>2</sub> O | Yz | PAS | b <sub>3</sub> -H <sub>2</sub> O |  | y <sub>6</sub> <sup>+2</sup> | y <sub>3</sub> | AQAP | KAQ | y <sub>5</sub> |  |  |  | y <sub>6</sub> | b <sub>13</sub> <sup>+2</sup> | Delta ppm |  |  | 5.3 | -10.8 | 2.7 |  | 6.7 | -27.2 | -16.9 | 5.2 | 0.8 | -7.2 | 9.1 |  | -4.5 | 8.8 | -2.2 | -4.7 | -0.8 |  |  |  |  | -0.7 | -7.6 |
| Fragment-Ion (m/z)                                                                                                                                                                                                                                                                                                                                                                                                                                                                                                                                                                                                                                                                                                                                                                                                                                                                                                                                                                                                                                                                                                                                                                                                                                                                                                                                                                                                                                                                                                                                                                                                                                                                                                                                                                                                                                                                                                                                                                                                                                                                                                                                                                                                                                                                                                                                                                                                                                                                                                                                                                                                                     | 60.045 | 70.066  | 72.080 | 84.081           | 101.070        | 129.103                     | 141.100                         | 169.095                    | 200.105                     | 238.120              | 244.164 | 256.133     | 297.156                          | 298.156                                                      | 306.182 <sup>+2</sup>        | 315.202        | 368.192 | 442.242 | 514.305        | 554.345 | 597.300 <sup>+2</sup> | 600.308 <sup>+2</sup> | 611.351        | 638.300                       | 683.853 <sup>+2</sup> |         |         |         |         |                       |         |         |         |         |         |                       |                       |         |         |                       |                         |      |      |      |      |      |      |      |      |      |      |      |      |      |      |       |      |      |      |      |      |      |      |       |      |      |                       |       |      |      |      |      |      |       |       |       |       |       |       |       |       |       |       |       |       |       |       |       |       |        |       |       |       |       |  |      |      |  |      |      |      |      |      |      |      |      |      |      |      |      |      |      |      |       |       |      |       |      |          |  |    |   |    |  |     |       |    |    |                      |    |     |                                  |  |                              |                |      |     |                |  |  |  |                |                               |           |  |  |     |       |     |  |     |       |       |     |     |      |     |  |      |     |      |      |      |  |  |  |  |      |      |
| Frac. Inten. (% of TIC)                                                                                                                                                                                                                                                                                                                                                                                                                                                                                                                                                                                                                                                                                                                                                                                                                                                                                                                                                                                                                                                                                                                                                                                                                                                                                                                                                                                                                                                                                                                                                                                                                                                                                                                                                                                                                                                                                                                                                                                                                                                                                                                                                                                                                                                                                                                                                                                                                                                                                                                                                                                                                | 3.44   | 0.02    | 0.61   | 0.34             | 0.09           | 0.19                        | 6.55                            | 3.14                       | 2.49                        | 4.50                 | 5.25    | 4.31        | 3.46                             | 2.62                                                         | 10.12                        | 2.65           | 6.60    | 3.80    | 5.10           | 4.22    | 2.53                  | 3.15                  | 19.46          | 2.51                          | 2.85                  |         |         |         |         |                       |         |         |         |         |         |                       |                       |         |         |                       |                         |      |      |      |      |      |      |      |      |      |      |      |      |      |      |       |      |      |      |      |      |      |      |       |      |      |                       |       |      |      |      |      |      |       |       |       |       |       |       |       |       |       |       |       |       |       |       |       |       |        |       |       |       |       |  |      |      |  |      |      |      |      |      |      |      |      |      |      |      |      |      |      |      |       |       |      |       |      |          |  |    |   |    |  |     |       |    |    |                      |    |     |                                  |  |                              |                |      |     |                |  |  |  |                |                               |           |  |  |     |       |     |  |     |       |       |     |     |      |     |  |      |     |      |      |      |  |  |  |  |      |      |
| Rel. Inten. (% of BP)                                                                                                                                                                                                                                                                                                                                                                                                                                                                                                                                                                                                                                                                                                                                                                                                                                                                                                                                                                                                                                                                                                                                                                                                                                                                                                                                                                                                                                                                                                                                                                                                                                                                                                                                                                                                                                                                                                                                                                                                                                                                                                                                                                                                                                                                                                                                                                                                                                                                                                                                                                                                                  | 17.65  | 0.10    | 3.16   | 1.76             | 0.44           | 0.97                        | 33.64                           | 16.15                      | 12.79                       | 23.15                | 26.97   | 22.12       | 17.80                            | 13.46                                                        | 51.99                        | 13.61          | 33.90   | 19.55   | 26.22          | 21.67   | 13.02                 | 16.20                 | 100.00         | 12.88                         | 14.66                 |         |         |         |         |                       |         |         |         |         |         |                       |                       |         |         |                       |                         |      |      |      |      |      |      |      |      |      |      |      |      |      |      |       |      |      |      |      |      |      |      |       |      |      |                       |       |      |      |      |      |      |       |       |       |       |       |       |       |       |       |       |       |       |       |       |       |       |        |       |       |       |       |  |      |      |  |      |      |      |      |      |      |      |      |      |      |      |      |      |      |      |       |       |      |       |      |          |  |    |   |    |  |     |       |    |    |                      |    |     |                                  |  |                              |                |      |     |                |  |  |  |                |                               |           |  |  |     |       |     |  |     |       |       |     |     |      |     |  |      |     |      |      |      |  |  |  |  |      |      |
| Score                                                                                                                                                                                                                                                                                                                                                                                                                                                                                                                                                                                                                                                                                                                                                                                                                                                                                                                                                                                                                                                                                                                                                                                                                                                                                                                                                                                                                                                                                                                                                                                                                                                                                                                                                                                                                                                                                                                                                                                                                                                                                                                                                                                                                                                                                                                                                                                                                                                                                                                                                                                                                                  | -0.18  |         | 0.50   | 0.50             |                | 0.20                        | 0.50                            | 0.75                       | 0.75                        | 0.50                 | 1.50    | 0.75        | 0.75                             | 0.75                                                         | 1.50                         | 1.50           | 0.75    | 1.50    | 0.75           | 1.50    | -0.22                 | -0.13                 | 0.50           | -0.13                         | 0.50                  |         |         |         |         |                       |         |         |         |         |         |                       |                       |         |         |                       |                         |      |      |      |      |      |      |      |      |      |      |      |      |      |      |       |      |      |      |      |      |      |      |       |      |      |                       |       |      |      |      |      |      |       |       |       |       |       |       |       |       |       |       |       |       |       |       |       |       |        |       |       |       |       |  |      |      |  |      |      |      |      |      |      |      |      |      |      |      |      |      |      |      |       |       |      |       |      |          |  |    |   |    |  |     |       |    |    |                      |    |     |                                  |  |                              |                |      |     |                |  |  |  |                |                               |           |  |  |     |       |     |  |     |       |       |     |     |      |     |  |      |     |      |      |      |  |  |  |  |      |      |
| Ion-type                                                                                                                                                                                                                                                                                                                                                                                                                                                                                                                                                                                                                                                                                                                                                                                                                                                                                                                                                                                                                                                                                                                                                                                                                                                                                                                                                                                                                                                                                                                                                                                                                                                                                                                                                                                                                                                                                                                                                                                                                                                                                                                                                                                                                                                                                                                                                                                                                                                                                                                                                                                                                               |        | FR      | V      | KQ               |                | RKQ                         | AP-28                           | AP                         | QA                          | PAS-H <sub>2</sub> O | Yz      | PAS         | b <sub>3</sub> -H <sub>2</sub> O |                                                              | y <sub>6</sub> <sup>+2</sup> | y <sub>3</sub> | AQAP    | KAQ     | y <sub>5</sub> |         |                       |                       | y <sub>6</sub> | b <sub>13</sub> <sup>+2</sup> |                       |         |         |         |         |                       |         |         |         |         |         |                       |                       |         |         |                       |                         |      |      |      |      |      |      |      |      |      |      |      |      |      |      |       |      |      |      |      |      |      |      |       |      |      |                       |       |      |      |      |      |      |       |       |       |       |       |       |       |       |       |       |       |       |       |       |       |       |        |       |       |       |       |  |      |      |  |      |      |      |      |      |      |      |      |      |      |      |      |      |      |      |       |       |      |       |      |          |  |    |   |    |  |     |       |    |    |                      |    |     |                                  |  |                              |                |      |     |                |  |  |  |                |                               |           |  |  |     |       |     |  |     |       |       |     |     |      |     |  |      |     |      |      |      |  |  |  |  |      |      |
| Delta ppm                                                                                                                                                                                                                                                                                                                                                                                                                                                                                                                                                                                                                                                                                                                                                                                                                                                                                                                                                                                                                                                                                                                                                                                                                                                                                                                                                                                                                                                                                                                                                                                                                                                                                                                                                                                                                                                                                                                                                                                                                                                                                                                                                                                                                                                                                                                                                                                                                                                                                                                                                                                                                              |        |         | 5.3    | -10.8            | 2.7            |                             | 6.7                             | -27.2                      | -16.9                       | 5.2                  | 0.8     | -7.2        | 9.1                              |                                                              | -4.5                         | 8.8            | -2.2    | -4.7    | -0.8           |         |                       |                       |                | -0.7                          | -7.6                  |         |         |         |         |                       |         |         |         |         |         |                       |                       |         |         |                       |                         |      |      |      |      |      |      |      |      |      |      |      |      |      |      |       |      |      |      |      |      |      |      |       |      |      |                       |       |      |      |      |      |      |       |       |       |       |       |       |       |       |       |       |       |       |       |       |       |       |        |       |       |       |       |  |      |      |  |      |      |      |      |      |      |      |      |      |      |      |      |      |      |      |       |       |      |       |      |          |  |    |   |    |  |     |       |    |    |                      |    |     |                                  |  |                              |                |      |     |                |  |  |  |                |                               |           |  |  |     |       |     |  |     |       |       |     |     |      |     |  |      |     |      |      |      |  |  |  |  |      |      |

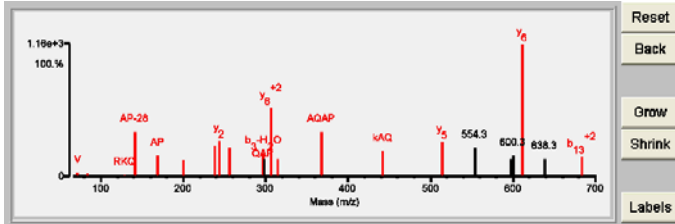

Result Summary

| Rank | Score | SPI (%) | BCS | # Unmatched Ions | Variable sites | Sequence             | MH <sup>+</sup> Calculated (Da) | MH <sup>+</sup> Error (Da) | MH <sup>+</sup> Error (ppm) | Protein MW/pi (Da) | Species | Accession # | Protein Name                                                 |
|------|-------|---------|-----|------------------|----------------|----------------------|---------------------------------|----------------------------|-----------------------------|--------------------|---------|-------------|--------------------------------------------------------------|
| 1    | 16.01 | 76.3    | 8   | 6/25             | K149k          | (K)AQAAPASVPAQAPK(R) | 1533.8496                       | 114.0404                   | -1.5                        | 17752.2/11.67      | HUMAN   | P47914      | 60S ribosomal protein L29 OS=Homo sapiens GN=RPL29 PE=1 SV=2 |

Detailed Results

| Rank                    | Score  | SPI (%) | BCS    | # Unmatched Ions | Variable sites | Sequence                        | MH <sup>+</sup> Calculated (Da) | MH <sup>+</sup> Error (Da) | MH <sup>+</sup> Error (ppm) | Protein MW/pi (Da) | Species | Accession #           | MS-Digest Index # | Protein Name                                                 |                |                |                |                               |                                  |                               |         |                |                |                |          |
|-------------------------|--------|---------|--------|------------------|----------------|---------------------------------|---------------------------------|----------------------------|-----------------------------|--------------------|---------|-----------------------|-------------------|--------------------------------------------------------------|----------------|----------------|----------------|-------------------------------|----------------------------------|-------------------------------|---------|----------------|----------------|----------------|----------|
| 1                       | 16.01  | 76.3    | 8      | 6/25             | K149k          | (K)AQAAPASVPAQAPK(R)            | 1533.8496                       | 114.0404                   | -1.5                        | 17752.2/11.67      | HUMAN   | P47914                | 610387            | 60S ribosomal protein L29 OS=Homo sapiens GN=RPL29 PE=1 SV=2 |                |                |                |                               |                                  |                               |         |                |                |                |          |
| Fragment-Ion (m/z)      | 60.046 | 70.065  | 72.081 | 84.078           | 159.107        | 183.078                         | 200.101                         | 297.155                    | 311.168                     | 355.201            | 369.192 | 370.697 <sup>+2</sup> | 413.213           | 441.249                                                      | 441.751        | 514.309        | 585.332        | 618.334 <sup>+2</sup>         | 650.340                          | 653.865 <sup>+2</sup>         | 668.298 | 713.404        | 767.397        | 881.496        | 1067.567 |
| Frac. Inten. (% of TIC) | 2.07   | 0.00    | 0.09   | 0.07             | 2.68           | 3.40                            | 8.54                            | 3.56                       | 3.51                        | 3.20               | 2.72    | 8.47                  | 4.67              | 8.06                                                         | 4.61           | 4.19           | 3.08           | 6.64                          | 2.28                             | 2.97                          | 3.18    | 3.42           | 2.47           | 14.05          | 2.08     |
| Rel. Inten. (% of BP)   | 14.70  | 0.03    | 0.62   | 0.47             | 19.07          | 24.18                           | 60.79                           | 25.32                      | 25.00                       | 22.77              | 19.34   | 60.32                 | 33.26             | 57.37                                                        | 32.85          | 29.79          | 21.92          | 47.27                         | 16.21                            | 21.15                         | 22.63   | 24.31          | 17.62          | 100.00         | 14.83    |
| Score                   | -0.15  | 0.20    | 0.50   | 0.50             | -0.19          | 0.25                            | 0.75                            | 0.75                       | 0.75                        | 0.75               | -0.19   | -0.60                 | 0.50              | 1.50                                                         | -0.33          | 1.50           | 1.50           | 1.50                          | 0.25                             | 1.50                          | -0.23   | 1.50           | 0.50           | 1.50           | 1.50     |
| Ion-type                | PR     | PR      | V      | KQ               |                | b <sub>2</sub> -NH <sub>3</sub> | b <sub>2</sub>                  | QAP                        | AAPA                        | SVPA               |         | b <sub>5</sub>        | y <sup>++7</sup>  | y <sup>++7</sup>                                             | y <sub>3</sub> | y <sub>4</sub> | y <sub>4</sub> | y <sub>11</sub> <sup>+2</sup> | b <sub>8</sub> -H <sub>2</sub> O | y <sub>12</sub> <sup>+2</sup> |         | y <sub>5</sub> | b <sub>9</sub> | y <sub>9</sub> |          |
| Delta ppm               |        | 2.5     | 3.1    | -31.8            |                | 2.1                             | -17.3                           | -5.8                       | -13.4                       | 5.9                |         | -6.1                  | -5.3              |                                                              | -1.0           | -25.5          | -20.4          | 20.5                          | -0.1                             |                               | -1.4    | -11.4          | 0.6            | -27.1          |          |

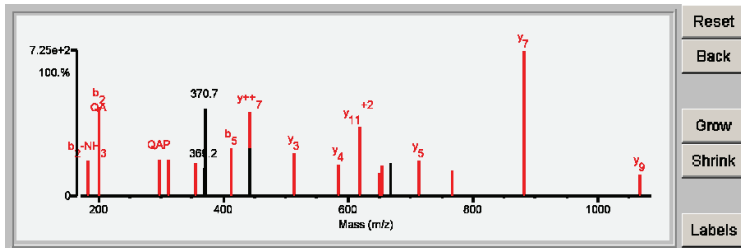

Reset  
Back  
Grow  
Shrink  
Labels



Result Summary

| Rank | Score | SPI (%) | BCS | # Unmatched Ions | Variable sites | Sequence           | MH <sup>+</sup> Calculated (Da) | MH <sup>+</sup> Error (Da) | MH <sup>+</sup> Error (ppm) | Protein MW/pl (Da) | Species | Accession # | Protein Name                                                 |
|------|-------|---------|-----|------------------|----------------|--------------------|---------------------------------|----------------------------|-----------------------------|--------------------|---------|-------------|--------------------------------------------------------------|
| 1    | 13.22 | 62.8    | 8   | 12/24            | K131k          | (K)GDVPTkRPPVLR(A) | 1334.7903                       | 114.0563                   | 9.2                         | 29995.8/10.61      | HUMAN   | P62424      | 60S ribosomal protein L7a OS=Homo sapiens GN=RPL7A PE=1 SV=2 |

Detailed Results

| Rank                   | Score  | SPI (%) | BCS    | # Unmatched Ions | Variable sites | Sequence                       | MH <sup>+</sup> Calculated (Da) | MH <sup>+</sup> Error (Da) | MH <sup>+</sup> Error (ppm) | Protein MW/pl (Da)    | Species | Accession #           | MS-Digest Index #     | Protein Name                                                 |                       |                  |                       |                       |                                   |                       |         |         |         |                       |
|------------------------|--------|---------|--------|------------------|----------------|--------------------------------|---------------------------------|----------------------------|-----------------------------|-----------------------|---------|-----------------------|-----------------------|--------------------------------------------------------------|-----------------------|------------------|-----------------------|-----------------------|-----------------------------------|-----------------------|---------|---------|---------|-----------------------|
| 1                      | 13.22  | 62.8    | 8      | 12/24            | K131k          | (K)G D V P T k R P P V L R (A) | 1334.7903                       | 114.0563                   | 9.2                         | 29995.8/10.61         | HUMAN   | P62424                | 629511                | 60S ribosomal protein L7a OS=Homo sapiens GN=RPL7A PE=1 SV=2 |                       |                  |                       |                       |                                   |                       |         |         |         |                       |
| Fragment-ion (m/z)     | 70.065 | 72.082  | 86.104 | 127.053          | 142.094        | 149.025                        | 175.119                         | 288.195                    | 291.684                     | 326.203 <sup>+3</sup> | 369.229 | 374.241 <sup>+3</sup> | 393.244 <sup>+3</sup> | 407.233                                                      | 461.823 <sup>+2</sup> | 484.317          | 490.314 <sup>+2</sup> | 512.318 <sup>+2</sup> | 531.816 <sup>+2</sup>             | 540.836 <sup>+2</sup> | 560.849 | 563.330 | 581.383 | 589.360 <sup>+2</sup> |
| Frac. Inten.(% of TIC) | 0.02   | 0.58    | 1.95   | 3.06             | 1.78           | 4.36                           | 3.54                            | 1.90                       | 1.92                        | 2.52                  | 2.59    | 6.69                  | 25.24                 | 2.04                                                         | 3.69                  | 2.50             | 3.84                  | 4.54                  | 3.84                              | 9.73                  | 2.32    | 2.38    | 3.96    | 5.02                  |
| Rel. Inten.(% of BP)   | 0.08   | 2.29    | 7.74   | 12.13            | 7.04           | 17.27                          | 14.02                           | 7.51                       | 7.61                        | 9.98                  | 10.26   | 26.50                 | 100.00                | 8.08                                                         | 14.63                 | 9.90             | 15.24                 | 17.99                 | 15.23                             | 38.55                 | 9.19    | 9.43    | 15.71   | 19.90                 |
| Score                  | 0.20   | 0.50    | -0.08  | -0.12            | -0.07          | -0.17                          | 1.50                            | 1.50                       | -0.08                       | -0.10                 | 1.50    | -0.26                 | 1.50                  | -0.08                                                        | -0.15                 | 1.50             | 1.50                  | -0.18                 | 0.50                              | 1.50                  | -0.09   | -0.09   | 1.50    | 1.50                  |
| Ion-type               | PR     | V       |        |                  |                | Y1                             | Y2                              |                            |                             | Y <sup>++6</sup>      |         | Y <sup>3</sup>        |                       |                                                              | Y4                    | Y7 <sup>+2</sup> |                       |                       | Y8-H <sub>2</sub> O <sup>+2</sup> | Y8 <sup>+2</sup>      |         |         | Y5      | Y9 <sup>+2</sup>      |
| Delta ppm              | -0.4   | 17.0    |        |                  |                | -1.4                           | -27.5                           |                            |                             | -36.2                 |         | 0.9                   |                       |                                                              | -14.0                 | 5.1              |                       |                       | -26.3                             | 0.8                   |         |         | 9.7     | -2.4                  |

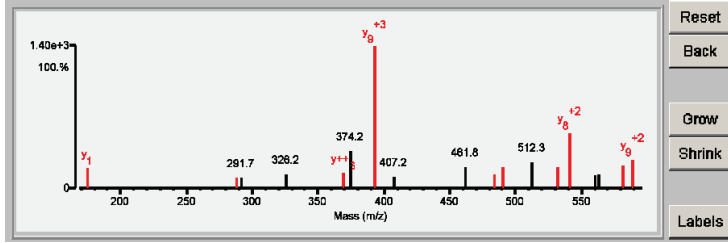

Reset

Back

Grow

Shrink

Labels

Result Summary

| Rank | Score | SPI (%) | BCS | # Unmatched Ions | Variable sites | Sequence          | MH <sup>+</sup> Calculated (Da) | MH <sup>+</sup> Error (Da) | MH <sup>+</sup> Error (ppm) | Protein MW/pl (Da) | Species | Accession # | Protein Name                                                 |
|------|-------|---------|-----|------------------|----------------|-------------------|---------------------------------|----------------------------|-----------------------------|--------------------|---------|-------------|--------------------------------------------------------------|
| 1    | 18.45 | 86.5    | 8   | 3/25             | K217k          | (K)GALAKLVEAIR(T) | 1140.7099                       | 114.0430                   | 0.1                         | 29995.8/10.61      | HUMAN   | P62424      | 60S ribosomal protein L7a OS=Homo sapiens GN=RPL7A PE=1 SV=2 |
| 2    | 8.27  | 60.0    | 4   | 12/25            | None           | (R)LRERVLELAG(G)  | 1254.7641                       | -0.0111                    | -8.9                        | 76119.6/5.76       | HUMAN   | Q8NE01      | Metal transporter CNNM3 OS=Homo sapiens GN=CNNM3 PE=1 SV=1   |

Detailed Results

| Rank                                                                                                                                                                                                                                                                                                                                                                                                                                                                                                                                                                                                                                                                                                                                                                                                                                                                                                                                                                                                                                                                                                                                                                                                                                                                                                                                                                                                                                                                                                                                                                                                                                                                                                                                                                                                                                                                                                                                                                                                                                                                                                                                                                                                                                                                                                                                                                                                                                                                                                                                                                                         | Score  | SPI (%) | BCS    | # Unmatched Ions | Variable sites | Sequence                         | MH <sup>+</sup> Calculated (Da) | MH <sup>+</sup> Error (Da) | MH <sup>+</sup> Error (ppm) | Protein MW/pl (Da) | Species | Accession # | MS-Digest Index # | Protein Name                                                 |                    |         |                       |         |                       |         |         |                       |         |         |         |         |         |         |                       |         |         |                       |         |                       |         |         |                       |         |         |         |                         |      |      |      |      |      |      |      |      |      |      |      |      |      |      |      |      |      |       |      |      |      |      |      |      |      |                       |      |       |      |       |       |      |       |       |       |       |      |       |       |      |       |       |       |        |       |      |      |       |       |       |       |       |      |       |      |      |      |  |       |      |      |       |      |      |      |      |      |      |      |      |      |      |      |      |      |      |      |          |   |    |    |    |    |     |  |    |    |  |    |    |    |                  |     |        |                  |    |                  |      |    |                  |    |    |    |           |     |  |     |      |  |  |  |     |     |  |      |      |     |     |      |      |      |      |      |       |      |     |      |     |      |
|----------------------------------------------------------------------------------------------------------------------------------------------------------------------------------------------------------------------------------------------------------------------------------------------------------------------------------------------------------------------------------------------------------------------------------------------------------------------------------------------------------------------------------------------------------------------------------------------------------------------------------------------------------------------------------------------------------------------------------------------------------------------------------------------------------------------------------------------------------------------------------------------------------------------------------------------------------------------------------------------------------------------------------------------------------------------------------------------------------------------------------------------------------------------------------------------------------------------------------------------------------------------------------------------------------------------------------------------------------------------------------------------------------------------------------------------------------------------------------------------------------------------------------------------------------------------------------------------------------------------------------------------------------------------------------------------------------------------------------------------------------------------------------------------------------------------------------------------------------------------------------------------------------------------------------------------------------------------------------------------------------------------------------------------------------------------------------------------------------------------------------------------------------------------------------------------------------------------------------------------------------------------------------------------------------------------------------------------------------------------------------------------------------------------------------------------------------------------------------------------------------------------------------------------------------------------------------------------|--------|---------|--------|------------------|----------------|----------------------------------|---------------------------------|----------------------------|-----------------------------|--------------------|---------|-------------|-------------------|--------------------------------------------------------------|--------------------|---------|-----------------------|---------|-----------------------|---------|---------|-----------------------|---------|---------|---------|---------|---------|---------|-----------------------|---------|---------|-----------------------|---------|-----------------------|---------|---------|-----------------------|---------|---------|---------|-------------------------|------|------|------|------|------|------|------|------|------|------|------|------|------|------|------|------|------|-------|------|------|------|------|------|------|------|-----------------------|------|-------|------|-------|-------|------|-------|-------|-------|-------|------|-------|-------|------|-------|-------|-------|--------|-------|------|------|-------|-------|-------|-------|-------|------|-------|------|------|------|--|-------|------|------|-------|------|------|------|------|------|------|------|------|------|------|------|------|------|------|------|----------|---|----|----|----|----|-----|--|----|----|--|----|----|----|------------------|-----|--------|------------------|----|------------------|------|----|------------------|----|----|----|-----------|-----|--|-----|------|--|--|--|-----|-----|--|------|------|-----|-----|------|------|------|------|------|-------|------|-----|------|-----|------|
| 1                                                                                                                                                                                                                                                                                                                                                                                                                                                                                                                                                                                                                                                                                                                                                                                                                                                                                                                                                                                                                                                                                                                                                                                                                                                                                                                                                                                                                                                                                                                                                                                                                                                                                                                                                                                                                                                                                                                                                                                                                                                                                                                                                                                                                                                                                                                                                                                                                                                                                                                                                                                            | 18.45  | 86.5    | 8      | 3/25             | K217k          | (K)G A L I A K L I V E A I R (T) | 1140.7099                       | 114.0430                   | 0.1                         | 29995.8/10.61      | HUMAN   | P62424      | 629511            | 60S ribosomal protein L7a OS=Homo sapiens GN=RPL7A PE=1 SV=2 |                    |         |                       |         |                       |         |         |                       |         |         |         |         |         |         |                       |         |         |                       |         |                       |         |         |                       |         |         |         |                         |      |      |      |      |      |      |      |      |      |      |      |      |      |      |      |      |      |       |      |      |      |      |      |      |      |                       |      |       |      |       |       |      |       |       |       |       |      |       |       |      |       |       |       |        |       |      |      |       |       |       |       |       |      |       |      |      |      |  |       |      |      |       |      |      |      |      |      |      |      |      |      |      |      |      |      |      |      |          |   |    |    |    |    |     |  |    |    |  |    |    |    |                  |     |        |                  |    |                  |      |    |                  |    |    |    |           |     |  |     |      |  |  |  |     |     |  |      |      |     |     |      |      |      |      |      |       |      |     |      |     |      |
| <table border="1"> <thead> <tr> <th>Fragment-ion (m/z)</th> <th>72.081</th> <th>84.081</th> <th>86.097</th> <th>101.071</th> <th>129.067</th> <th>129.100</th> <th>157.134</th> <th>175.119</th> <th>242.153</th> <th>271.158</th> <th>313.192</th> <th>356.229</th> <th>359.242</th> <th>370.246<sup>+2</sup></th> <th>427.265</th> <th>470.272</th> <th>471.796<sup>+2</sup></th> <th>488.282</th> <th>507.307<sup>+2</sup></th> <th>540.345</th> <th>555.326</th> <th>563.851<sup>+2</sup></th> <th>587.350</th> <th>668.411</th> <th>700.430</th> </tr> </thead> <tbody> <tr> <td>Frac. Inten. (% of TIC)</td> <td>0.25</td> <td>9.23</td> <td>0.76</td> <td>6.21</td> <td>2.83</td> <td>0.05</td> <td>2.38</td> <td>5.75</td> <td>2.75</td> <td>1.91</td> <td>1.75</td> <td>1.88</td> <td>5.85</td> <td>1.83</td> <td>2.40</td> <td>2.08</td> <td>3.42</td> <td>18.62</td> <td>4.90</td> <td>1.41</td> <td>1.61</td> <td>3.92</td> <td>7.88</td> <td>2.99</td> <td>7.35</td> </tr> <tr> <td>Rel. Inten. (% of BP)</td> <td>1.35</td> <td>49.60</td> <td>4.08</td> <td>33.34</td> <td>15.21</td> <td>0.27</td> <td>12.80</td> <td>30.88</td> <td>14.76</td> <td>10.24</td> <td>9.41</td> <td>10.08</td> <td>31.41</td> <td>9.84</td> <td>12.88</td> <td>11.15</td> <td>18.36</td> <td>100.00</td> <td>26.34</td> <td>7.59</td> <td>8.65</td> <td>21.06</td> <td>42.35</td> <td>16.06</td> <td>39.47</td> </tr> <tr> <td>Score</td> <td>0.50</td> <td>-0.50</td> <td>0.22</td> <td>0.50</td> <td>0.50</td> <td></td> <td>-0.13</td> <td>1.50</td> <td>0.50</td> <td>-0.10</td> <td>0.50</td> <td>0.75</td> <td>1.50</td> <td>0.50</td> <td>0.75</td> <td>0.50</td> <td>1.50</td> <td>1.50</td> <td>1.50</td> <td>0.75</td> <td>0.50</td> <td>1.50</td> <td>1.50</td> <td>0.50</td> <td>1.50</td> </tr> <tr> <td>Ion-type</td> <td>V</td> <td>LI</td> <td>LI</td> <td>a2</td> <td>b2</td> <td>QKR</td> <td></td> <td>y1</td> <td>b3</td> <td></td> <td>b4</td> <td>kL</td> <td>y3</td> <td>a7<sup>+2</sup></td> <td>AkL</td> <td>y4-H2O</td> <td>y7<sup>+2</sup></td> <td>y4</td> <td>y8<sup>+2</sup></td> <td>LAKL</td> <td>b5</td> <td>y9<sup>+2</sup></td> <td>y5</td> <td>b6</td> <td>y6</td> </tr> <tr> <td>Delta ppm</td> <td>5.9</td> <td></td> <td>9.0</td> <td>-7.3</td> <td></td> <td></td> <td></td> <td>0.3</td> <td>6.1</td> <td></td> <td>10.8</td> <td>-5.1</td> <td>5.8</td> <td>1.5</td> <td>-5.7</td> <td>-1.4</td> <td>12.8</td> <td>-1.3</td> <td>-3.2</td> <td>-11.3</td> <td>-0.9</td> <td>0.4</td> <td>-1.9</td> <td>2.0</td> <td>-7.3</td> </tr> </tbody> </table> |        |         |        |                  |                |                                  |                                 |                            |                             |                    |         |             |                   |                                                              | Fragment-ion (m/z) | 72.081  | 84.081                | 86.097  | 101.071               | 129.067 | 129.100 | 157.134               | 175.119 | 242.153 | 271.158 | 313.192 | 356.229 | 359.242 | 370.246 <sup>+2</sup> | 427.265 | 470.272 | 471.796 <sup>+2</sup> | 488.282 | 507.307 <sup>+2</sup> | 540.345 | 555.326 | 563.851 <sup>+2</sup> | 587.350 | 668.411 | 700.430 | Frac. Inten. (% of TIC) | 0.25 | 9.23 | 0.76 | 6.21 | 2.83 | 0.05 | 2.38 | 5.75 | 2.75 | 1.91 | 1.75 | 1.88 | 5.85 | 1.83 | 2.40 | 2.08 | 3.42 | 18.62 | 4.90 | 1.41 | 1.61 | 3.92 | 7.88 | 2.99 | 7.35 | Rel. Inten. (% of BP) | 1.35 | 49.60 | 4.08 | 33.34 | 15.21 | 0.27 | 12.80 | 30.88 | 14.76 | 10.24 | 9.41 | 10.08 | 31.41 | 9.84 | 12.88 | 11.15 | 18.36 | 100.00 | 26.34 | 7.59 | 8.65 | 21.06 | 42.35 | 16.06 | 39.47 | Score | 0.50 | -0.50 | 0.22 | 0.50 | 0.50 |  | -0.13 | 1.50 | 0.50 | -0.10 | 0.50 | 0.75 | 1.50 | 0.50 | 0.75 | 0.50 | 1.50 | 1.50 | 1.50 | 0.75 | 0.50 | 1.50 | 1.50 | 0.50 | 1.50 | Ion-type | V | LI | LI | a2 | b2 | QKR |  | y1 | b3 |  | b4 | kL | y3 | a7 <sup>+2</sup> | AkL | y4-H2O | y7 <sup>+2</sup> | y4 | y8 <sup>+2</sup> | LAKL | b5 | y9 <sup>+2</sup> | y5 | b6 | y6 | Delta ppm | 5.9 |  | 9.0 | -7.3 |  |  |  | 0.3 | 6.1 |  | 10.8 | -5.1 | 5.8 | 1.5 | -5.7 | -1.4 | 12.8 | -1.3 | -3.2 | -11.3 | -0.9 | 0.4 | -1.9 | 2.0 | -7.3 |
| Fragment-ion (m/z)                                                                                                                                                                                                                                                                                                                                                                                                                                                                                                                                                                                                                                                                                                                                                                                                                                                                                                                                                                                                                                                                                                                                                                                                                                                                                                                                                                                                                                                                                                                                                                                                                                                                                                                                                                                                                                                                                                                                                                                                                                                                                                                                                                                                                                                                                                                                                                                                                                                                                                                                                                           | 72.081 | 84.081  | 86.097 | 101.071          | 129.067        | 129.100                          | 157.134                         | 175.119                    | 242.153                     | 271.158            | 313.192 | 356.229     | 359.242           | 370.246 <sup>+2</sup>                                        | 427.265            | 470.272 | 471.796 <sup>+2</sup> | 488.282 | 507.307 <sup>+2</sup> | 540.345 | 555.326 | 563.851 <sup>+2</sup> | 587.350 | 668.411 | 700.430 |         |         |         |                       |         |         |                       |         |                       |         |         |                       |         |         |         |                         |      |      |      |      |      |      |      |      |      |      |      |      |      |      |      |      |      |       |      |      |      |      |      |      |      |                       |      |       |      |       |       |      |       |       |       |       |      |       |       |      |       |       |       |        |       |      |      |       |       |       |       |       |      |       |      |      |      |  |       |      |      |       |      |      |      |      |      |      |      |      |      |      |      |      |      |      |      |          |   |    |    |    |    |     |  |    |    |  |    |    |    |                  |     |        |                  |    |                  |      |    |                  |    |    |    |           |     |  |     |      |  |  |  |     |     |  |      |      |     |     |      |      |      |      |      |       |      |     |      |     |      |
| Frac. Inten. (% of TIC)                                                                                                                                                                                                                                                                                                                                                                                                                                                                                                                                                                                                                                                                                                                                                                                                                                                                                                                                                                                                                                                                                                                                                                                                                                                                                                                                                                                                                                                                                                                                                                                                                                                                                                                                                                                                                                                                                                                                                                                                                                                                                                                                                                                                                                                                                                                                                                                                                                                                                                                                                                      | 0.25   | 9.23    | 0.76   | 6.21             | 2.83           | 0.05                             | 2.38                            | 5.75                       | 2.75                        | 1.91               | 1.75    | 1.88        | 5.85              | 1.83                                                         | 2.40               | 2.08    | 3.42                  | 18.62   | 4.90                  | 1.41    | 1.61    | 3.92                  | 7.88    | 2.99    | 7.35    |         |         |         |                       |         |         |                       |         |                       |         |         |                       |         |         |         |                         |      |      |      |      |      |      |      |      |      |      |      |      |      |      |      |      |      |       |      |      |      |      |      |      |      |                       |      |       |      |       |       |      |       |       |       |       |      |       |       |      |       |       |       |        |       |      |      |       |       |       |       |       |      |       |      |      |      |  |       |      |      |       |      |      |      |      |      |      |      |      |      |      |      |      |      |      |      |          |   |    |    |    |    |     |  |    |    |  |    |    |    |                  |     |        |                  |    |                  |      |    |                  |    |    |    |           |     |  |     |      |  |  |  |     |     |  |      |      |     |     |      |      |      |      |      |       |      |     |      |     |      |
| Rel. Inten. (% of BP)                                                                                                                                                                                                                                                                                                                                                                                                                                                                                                                                                                                                                                                                                                                                                                                                                                                                                                                                                                                                                                                                                                                                                                                                                                                                                                                                                                                                                                                                                                                                                                                                                                                                                                                                                                                                                                                                                                                                                                                                                                                                                                                                                                                                                                                                                                                                                                                                                                                                                                                                                                        | 1.35   | 49.60   | 4.08   | 33.34            | 15.21          | 0.27                             | 12.80                           | 30.88                      | 14.76                       | 10.24              | 9.41    | 10.08       | 31.41             | 9.84                                                         | 12.88              | 11.15   | 18.36                 | 100.00  | 26.34                 | 7.59    | 8.65    | 21.06                 | 42.35   | 16.06   | 39.47   |         |         |         |                       |         |         |                       |         |                       |         |         |                       |         |         |         |                         |      |      |      |      |      |      |      |      |      |      |      |      |      |      |      |      |      |       |      |      |      |      |      |      |      |                       |      |       |      |       |       |      |       |       |       |       |      |       |       |      |       |       |       |        |       |      |      |       |       |       |       |       |      |       |      |      |      |  |       |      |      |       |      |      |      |      |      |      |      |      |      |      |      |      |      |      |      |          |   |    |    |    |    |     |  |    |    |  |    |    |    |                  |     |        |                  |    |                  |      |    |                  |    |    |    |           |     |  |     |      |  |  |  |     |     |  |      |      |     |     |      |      |      |      |      |       |      |     |      |     |      |
| Score                                                                                                                                                                                                                                                                                                                                                                                                                                                                                                                                                                                                                                                                                                                                                                                                                                                                                                                                                                                                                                                                                                                                                                                                                                                                                                                                                                                                                                                                                                                                                                                                                                                                                                                                                                                                                                                                                                                                                                                                                                                                                                                                                                                                                                                                                                                                                                                                                                                                                                                                                                                        | 0.50   | -0.50   | 0.22   | 0.50             | 0.50           |                                  | -0.13                           | 1.50                       | 0.50                        | -0.10              | 0.50    | 0.75        | 1.50              | 0.50                                                         | 0.75               | 0.50    | 1.50                  | 1.50    | 1.50                  | 0.75    | 0.50    | 1.50                  | 1.50    | 0.50    | 1.50    |         |         |         |                       |         |         |                       |         |                       |         |         |                       |         |         |         |                         |      |      |      |      |      |      |      |      |      |      |      |      |      |      |      |      |      |       |      |      |      |      |      |      |      |                       |      |       |      |       |       |      |       |       |       |       |      |       |       |      |       |       |       |        |       |      |      |       |       |       |       |       |      |       |      |      |      |  |       |      |      |       |      |      |      |      |      |      |      |      |      |      |      |      |      |      |      |          |   |    |    |    |    |     |  |    |    |  |    |    |    |                  |     |        |                  |    |                  |      |    |                  |    |    |    |           |     |  |     |      |  |  |  |     |     |  |      |      |     |     |      |      |      |      |      |       |      |     |      |     |      |
| Ion-type                                                                                                                                                                                                                                                                                                                                                                                                                                                                                                                                                                                                                                                                                                                                                                                                                                                                                                                                                                                                                                                                                                                                                                                                                                                                                                                                                                                                                                                                                                                                                                                                                                                                                                                                                                                                                                                                                                                                                                                                                                                                                                                                                                                                                                                                                                                                                                                                                                                                                                                                                                                     | V      | LI      | LI     | a2               | b2             | QKR                              |                                 | y1                         | b3                          |                    | b4      | kL          | y3                | a7 <sup>+2</sup>                                             | AkL                | y4-H2O  | y7 <sup>+2</sup>      | y4      | y8 <sup>+2</sup>      | LAKL    | b5      | y9 <sup>+2</sup>      | y5      | b6      | y6      |         |         |         |                       |         |         |                       |         |                       |         |         |                       |         |         |         |                         |      |      |      |      |      |      |      |      |      |      |      |      |      |      |      |      |      |       |      |      |      |      |      |      |      |                       |      |       |      |       |       |      |       |       |       |       |      |       |       |      |       |       |       |        |       |      |      |       |       |       |       |       |      |       |      |      |      |  |       |      |      |       |      |      |      |      |      |      |      |      |      |      |      |      |      |      |      |          |   |    |    |    |    |     |  |    |    |  |    |    |    |                  |     |        |                  |    |                  |      |    |                  |    |    |    |           |     |  |     |      |  |  |  |     |     |  |      |      |     |     |      |      |      |      |      |       |      |     |      |     |      |
| Delta ppm                                                                                                                                                                                                                                                                                                                                                                                                                                                                                                                                                                                                                                                                                                                                                                                                                                                                                                                                                                                                                                                                                                                                                                                                                                                                                                                                                                                                                                                                                                                                                                                                                                                                                                                                                                                                                                                                                                                                                                                                                                                                                                                                                                                                                                                                                                                                                                                                                                                                                                                                                                                    | 5.9    |         | 9.0    | -7.3             |                |                                  |                                 | 0.3                        | 6.1                         |                    | 10.8    | -5.1        | 5.8               | 1.5                                                          | -5.7               | -1.4    | 12.8                  | -1.3    | -3.2                  | -11.3   | -0.9    | 0.4                   | -1.9    | 2.0     | -7.3    |         |         |         |                       |         |         |                       |         |                       |         |         |                       |         |         |         |                         |      |      |      |      |      |      |      |      |      |      |      |      |      |      |      |      |      |       |      |      |      |      |      |      |      |                       |      |       |      |       |       |      |       |       |       |       |      |       |       |      |       |       |       |        |       |      |      |       |       |       |       |       |      |       |      |      |      |  |       |      |      |       |      |      |      |      |      |      |      |      |      |      |      |      |      |      |      |          |   |    |    |    |    |     |  |    |    |  |    |    |    |                  |     |        |                  |    |                  |      |    |                  |    |    |    |           |     |  |     |      |  |  |  |     |     |  |      |      |     |     |      |      |      |      |      |       |      |     |      |     |      |

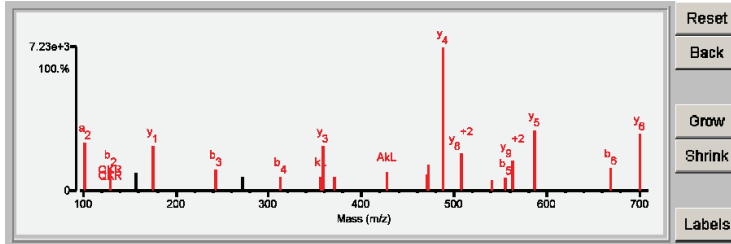

Result Summary

| Rank | Score | SPI (%) | BCS | # Unmatched Ions | Variable sites | Sequence               | MH <sup>+</sup> Calculated (Da) | MH <sup>+</sup> Error (Da) | MH <sup>+</sup> Error (ppm) | Protein MW (pl) (Da) | Species | Accession # | Protein Name                                                                              |
|------|-------|---------|-----|------------------|----------------|------------------------|---------------------------------|----------------------------|-----------------------------|----------------------|---------|-------------|-------------------------------------------------------------------------------------------|
| 1    | 13.40 | 65.8    | 7   | 8/25             | K302k          | (R)VWTSQLKSTIQTAELR(L) | 1932.0549                       | 114.0560                   | 6.4                         | 59609.5/8.49         | HUMAN   | Q16875      | 6-phosphofructo-2-kinase/fructose-2,6-biphosphatase 3 OS=Homo sapiens GN=PFKFB3 PE=1 SV=1 |

Detailed Results

| Rank                   | Score | SPI (%) | BCS | # Unmatched Ions | Variable sites | Sequence                                | MH <sup>+</sup> Calculated (Da) | MH <sup>+</sup> Error (Da) | MH <sup>+</sup> Error (ppm) | Protein MW (pl) (Da) | Species | Accession # | MS-Digest Index # | Protein Name                                                                              |         |         |         |                       |         |         |         |         |         |         |                       |                       |         |                       |                       |                       |          |      |      |      |      |
|------------------------|-------|---------|-----|------------------|----------------|-----------------------------------------|---------------------------------|----------------------------|-----------------------------|----------------------|---------|-------------|-------------------|-------------------------------------------------------------------------------------------|---------|---------|---------|-----------------------|---------|---------|---------|---------|---------|---------|-----------------------|-----------------------|---------|-----------------------|-----------------------|-----------------------|----------|------|------|------|------|
| 1                      | 13.40 | 65.8    | 7   | 8/25             | K302k          | (R) V W T S Q L K S T I Q T A E L R (L) | 1932.0549                       | 114.0560                   | 6.4                         | 59609.5/8.49         | HUMAN   | Q16875      | 204273            | 6-phosphofructo-2-kinase/fructose-2,6-biphosphatase 3 OS=Homo sapiens GN=PFKFB3 PE=1 SV=1 |         |         |         |                       |         |         |         |         |         |         |                       |                       |         |                       |                       |                       |          |      |      |      |      |
| Fragment-ion (m/z)     |       |         |     |                  |                |                                         | 72.079                          | 84.041                     | 84.079                      | 86.095               | 101.068 | 127.085     | 159.086           | 175.116                                                                                   | 185.166 | 258.162 | 286.148 | 346.160 <sup>+2</sup> | 356.185 | 385.205 | 440.280 | 488.284 | 532.236 | 660.370 | 722.904 <sup>+2</sup> | 777.944 <sup>+2</sup> | 788.429 | 872.485 <sup>+2</sup> | 880.983 <sup>+2</sup> | 975.029 <sup>+2</sup> | 1089.582 |      |      |      |      |
| Frac. Inten.(% of TIC) |       |         |     |                  |                |                                         | 0.38                            | 4.77                       | 0.27                        | 0.39                 | 0.13    | 7.92        | 0.09              | 3.83                                                                                      | 5.54    | 4.04    | 7.37    | 3.59                  | 2.88    | 3.88    | 5.89    | 4.02    | 2.84    | 6.58    | 4.34                  | 4.34                  | 3.84    | 5.67                  | 4.65                  | 8.95                  | 4.92     | 3.22 |      |      |      |
| Rel. Inten.(% of BP)   |       |         |     |                  |                |                                         | 4.19                            | 53.26                      | 3.03                        | 4.40                 | 1.42    | 88.47       | 0.97              | 42.81                                                                                     | 61.92   | 45.12   | 82.34   | 40.14                 | 32.11   | 43.33   | 65.75   | 44.90   | 31.75   | 73.50   | 48.43                 | 42.89                 | 63.32   | 51.89                 | 100.00                | 54.93                 | 35.99    | 1.50 | 1.50 | 1.50 | 1.50 |
| Score                  |       |         |     |                  |                |                                         | 0.50                            | -0.38                      | 0.50                        | 0.22                 |         | 88.47       | 2.00              | 1.50                                                                                      | -0.44   | 0.50    | 0.50    | -0.29                 | -0.23   | 0.75    | 0.47    | 1.50    | -0.23   | 1.50    | 1.50                  | 1.50                  | 1.50    | 1.50                  | 1.50                  | 1.50                  | 1.50     | 1.50 | 1.50 | 1.50 | 1.50 |
| Ion-type               |       |         |     |                  |                |                                         | a1                              | KQ                         | LI                          | KQ                   |         | W           | y1                | a2                                                                                        | b2      |         |         |                       | y4      |         |         | y6      |         |         | y12 <sup>+2</sup>     | y13-H2O <sup>+2</sup> | y7      | y15-NH3 <sup>+2</sup> | y15 <sup>+2</sup>     |                       | y10      |      |      |      |      |
| Delta ppm              |       |         |     |                  |                |                                         | -45.4                           |                            | -22.3                       | -15.4                |         |             |                   | -36.3                                                                                     | -19.1   |         | 2.4     | -28.7                 |         |         |         | 3.4     |         |         | 3.2                   |                       | -8.1    | 14.0                  | 3.4                   | 22.6                  | 5.0      |      | -7.2 |      |      |
| V                      |       |         |     |                  |                |                                         |                                 |                            |                             |                      |         |             |                   |                                                                                           |         |         |         |                       |         |         |         |         |         |         |                       |                       |         |                       |                       |                       |          |      |      |      |      |
| -30.2                  |       |         |     |                  |                |                                         |                                 |                            |                             |                      |         |             |                   |                                                                                           |         |         |         |                       |         |         |         |         |         |         |                       |                       |         |                       |                       |                       |          |      |      |      |      |

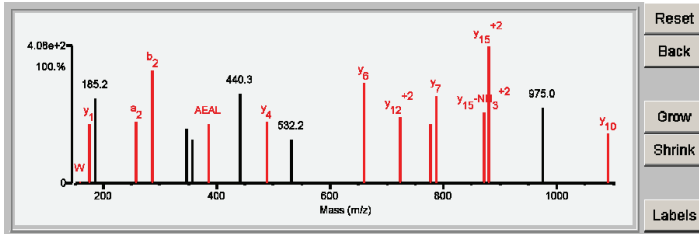

Result Summary

| Rank | Score | SPI (%) | BCS | # Unmatched ions | Variable sites | Sequence           | MH <sup>+</sup> Calculated (Da) | MH <sup>+</sup> Error (Da) | MH <sup>+</sup> Error (ppm) | Protein MW/pi (Da) | Species | Accession # | Protein Name                                                                       |
|------|-------|---------|-----|------------------|----------------|--------------------|---------------------------------|----------------------------|-----------------------------|--------------------|---------|-------------|------------------------------------------------------------------------------------|
| 1    | 11.93 | 74.5    | 6   | 10/24            | K59k           | (K)VWGAQLKEMVSK(L) | 1375.7614                       | 114.0662                   | 15.6                        | 53140.3/6.80       | HUMAN   | P52209      | 6-phosphogluconate dehydrogenase, decarboxylating OS=Homo sapiens GN=PGD PE=1 SV=3 |

Detailed Results

| Rank | Score | SPI (%) | BCS | # Unmatched ions | Variable sites | Sequence                                     | MH <sup>+</sup> Calculated (Da) | MH <sup>+</sup> Error (Da) | MH <sup>+</sup> Error (ppm) | Protein MW/pi (Da) | Species | Accession # | MS-Digest Index # | Protein Name                                                                       |
|------|-------|---------|-----|------------------|----------------|----------------------------------------------|---------------------------------|----------------------------|-----------------------------|--------------------|---------|-------------|-------------------|------------------------------------------------------------------------------------|
| 1    | 11.93 | 74.5    | 6   | 10/24            | K59k           | (K)V V I G A Q / S L / k E / M V / S / K (L) | 1375.7614                       | 114.0662                   | 15.6                        | 53140.3/6.80       | HUMAN   | P52209      | 2667              | 6-phosphogluconate dehydrogenase, decarboxylating OS=Homo sapiens GN=PGD PE=1 SV=3 |

  

| Fragment-ion (m/z)     | 70.066 | 72.081 | 84.046 | 84.081 | 86.096 | 101.071 | 120.080 | 129.088 | 136.076 | 141.102 | 147.111 | 171.149 | 173.129 | 187.139 | 199.080 | 199.143 | 216.127             | 234.149 | 455.297 | 464.250 | 573.308           | 646.342 <sup>+2</sup> | 835.454 | 1035.559 |
|------------------------|--------|--------|--------|--------|--------|---------|---------|---------|---------|---------|---------|---------|---------|---------|---------|---------|---------------------|---------|---------|---------|-------------------|-----------------------|---------|----------|
| Frac. Inten.(% of TIC) | 0.09   | 1.40   | 0.12   | 0.68   | 0.40   | 0.59    | 2.50    | 7.87    | 5.60    | 3.22    | 5.25    | 14.40   | 5.48    | 2.88    | 3.19    | 5.28    | 2.58                | 11.29   | 3.18    | 3.20    | 3.02              | 9.39                  | 3.90    | 4.47     |
| Rel. Inten.(% of BP)   | 0.63   | 9.75   | 0.83   | 4.75   | 2.81   | 4.12    | 17.36   | 54.66   | 38.90   | 22.38   | 36.47   | 100.00  | 38.04   | 19.98   | 22.19   | 36.68   | 17.95               | 78.45   | 22.10   | 22.20   | 20.98             | 65.26                 | 27.06   | 31.07    |
| Score                  | -0.00  | 0.50   | 1.00   | 0.50   | 0.22   | 0.22    | -0.05   | -0.17   | -0.12   | -0.07   | 1.50    | 0.50    | -0.12   | -0.06   | -0.07   | 0.50    | 0.50                | 1.50    | -0.07   | 1.50    | -0.06             | 1.50                  | 1.50    | 1.50     |
| Ion-type               |        | a1     | E      | KQ     | LI     | KQ      |         |         |         |         | y1      | a2      |         |         |         | b2      | y2-H <sub>2</sub> O | y2      |         | y4      | y11 <sup>+2</sup> | y6                    | y8      |          |
| Delta ppm              |        | -12.1  | 22.7   | 0.3    | -6.1   |         |         |         |         |         | -10.9   | -8.7    |         |         |         | -9.0    | -33.2               | 16.9    |         | 1.50    | 7.8               | 23.4                  | 8.3     |          |

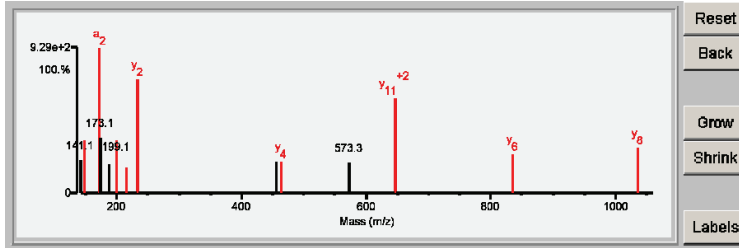

Result Summary

| Rank | Score | SPI (%) | BCS | # Unmatched ions | Variable sites | Sequence                         | MH <sup>+</sup> Calculated (Da) | MH <sup>+</sup> Error (Da) | MH <sup>+</sup> Error (ppm) | Protein MW/pI (Da) | Species | Accession # | Protein Name                                                     |
|------|-------|---------|-----|------------------|----------------|----------------------------------|---------------------------------|----------------------------|-----------------------------|--------------------|---------|-------------|------------------------------------------------------------------|
| 1    | 16.48 | 65.3    | 8   | 8/25             | K86k           | (K)YPIEHGIITNWDDMEKWHHTFYNELR(V) | 3457.6423                       | 114.0651                   | 6.2                         | 42019.2/5.23       | HUMAN   | P68032      | Actin, alpha cardiac muscle 1 OS=Homo sapiens GN=ACTC1 PE=1 SV=1 |
| 1    | 16.48 | 65.3    | 8   | 8/25             | K86k           | (K)YPIEHGIITNWDDMEKWHHTFYNELR(V) | 3457.6423                       | 114.0651                   | 6.2                         | 42051.3/5.23       | HUMAN   | P68133      | Actin, alpha skeletal muscle OS=Homo sapiens GN=ACTA1 PE=1 SV=1  |

Detailed Results

| Rank | Score | SPI (%) | BCS | # Unmatched ions | Variable sites | Sequence                         | MH <sup>+</sup> Calculated (Da) | MH <sup>+</sup> Error (Da) | MH <sup>+</sup> Error (ppm) | Protein MW/pI (Da) | Species | Accession # | MS-Digest Index # | Protein Name                                                     |
|------|-------|---------|-----|------------------|----------------|----------------------------------|---------------------------------|----------------------------|-----------------------------|--------------------|---------|-------------|-------------------|------------------------------------------------------------------|
| 1    | 16.48 | 65.3    | 8   | 8/25             | K86k           | (K)YPIEHGIITNWDDMEKWHHTFYNELR(V) | 3457.6423                       | 114.0651                   | 6.2                         | 42019.2/5.23       | HUMAN   | P68032      | 12371             | Actin, alpha cardiac muscle 1 OS=Homo sapiens GN=ACTC1 PE=1 SV=1 |
| 1    | 16.48 | 65.3    | 8   | 8/25             | K86k           | (K)YPIEHGIITNWDDMEKWHHTFYNELR(V) | 3457.6423                       | 114.0651                   | 6.2                         | 42051.3/5.23       | HUMAN   | P68133      | 12707             | Actin, alpha skeletal muscle OS=Homo sapiens GN=ACTA1 PE=1 SV=1  |

| Fragment-ion (m/z)      | 70.064 | 72.078 | 84.082 | 86.096 | 104.054 | 110.071 | 136.073 | 147.041 | 159.091 | 233.126 | 288.209 | 317.197 <sup>+2</sup> | 399.225              | 531.254 <sup>+2</sup> | 547.288 | 682.935 <sup>+5</sup> | 750.358 <sup>+3</sup> | 758.380 | 848.655 <sup>+4</sup> | 852.892 <sup>+4</sup> | 883.723 <sup>+3</sup> | 943.968 <sup>+2</sup> | 1009.515 <sup>+2</sup> | 1066.993 <sup>+2</sup> | 1124.505 <sup>+2</sup> |
|-------------------------|--------|--------|--------|--------|---------|---------|---------|---------|---------|---------|---------|-----------------------|----------------------|-----------------------|---------|-----------------------|-----------------------|---------|-----------------------|-----------------------|-----------------------|-----------------------|------------------------|------------------------|------------------------|
| Frac. Inten. (% of TIC) | 0.01   | 3.46   | 6.45   | 0.25   | 4.55    | 0.14    | 0.74    | 4.64    | 0.24    | 5.72    | 4.00    | 3.39                  | 3.80                 | 4.45                  | 3.90    | 4.51                  | 3.84                  | 5.49    | 3.64                  | 14.23                 | 3.81                  | 5.12                  | 3.52                   | 3.84                   | 6.28                   |
| Rel. Inten. (% of BP)   | 0.07   | 24.31  | 45.32  | 1.74   | 32.01   | 0.95    | 5.19    | 32.61   | 1.68    | 40.22   | 28.11   | 23.85                 | 26.71                | 31.30                 | 27.39   | 31.67                 | 27.02                 | 38.68   | 25.57                 | 100.00                | 26.80                 | 35.99                 | 24.73                  | 26.99                  | 44.13                  |
| Score                   | 0.20   | -0.24  | -0.45  | 0.22   | -0.32   | 1.00    | 1.00    | 2.00    | 0.50    | 1.50    | -0.24   | 0.50                  | 0.50                 | -0.27                 | -0.32   | -0.27                 | -0.27                 | 1.50    | 0.50                  | 1.50                  | 1.50                  | 1.50                  | 1.50                   | 1.50                   | 1.50                   |
| Ion-type                | PR     |        |        | LI     |         | H       | B1      | W       | a2      | y2      |         | y3-H2O                | y8-H2O <sup>+2</sup> |                       |         |                       |                       | y**+11  | y26-NH3 <sup>+4</sup> |                       | y19                   | y13 <sup>+2</sup>     | y14 <sup>+2</sup>      | y15 <sup>+2</sup>      | y16 <sup>+2</sup>      |
| Delta ppm               | -14.6  |        |        | -10.8  |         | -0.7    | -19.8   | 1.00    | -2.4    | -11.8   | 19.4    |                       | -24.4                | -15.2                 |         |                       |                       | 1.8     | 0.7                   | -21.7                 | -14.7                 | -0.4                  | 26.4                   | -8.3                   | -9.3                   |

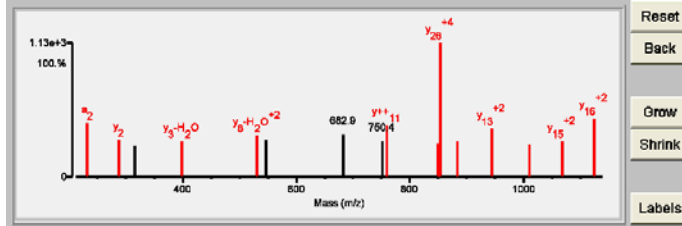

Result Summary

| Rank | Score | SPI (%) | BCS | # Unmatched Ions | Variable sites | Sequence            | MH <sup>+</sup> Calculated (Da) | MH <sup>+</sup> Error (Da) | MH <sup>+</sup> Error (ppm) | Protein MW/pl (Da) | Species | Accession # | Protein Name                                                                       |
|------|-------|---------|-----|------------------|----------------|---------------------|---------------------------------|----------------------------|-----------------------------|--------------------|---------|-------------|------------------------------------------------------------------------------------|
| 1    | 16.27 | 78.8    | 8   | 8/25             | K193k          | (R)DLTDYLMKILTER(G) | 1610.8458                       | 114.0545                   | 6.7                         | 42009.2/5.24       | HUMAN   | P62736      | Actin, aortic smooth muscle OS=Homo sapiens GN=ACTA2 PE=1 SV=1                     |
| 1    | 16.27 | 78.8    | 8   | 8/25             | K192k          | (R)DLTDYLMKILTER(G) | 1610.8458                       | 114.0545                   | 6.7                         | 42003.4/5.39       | HUMAN   | Q562R1      | Beta-actin-like protein 2 OS=Homo sapiens GN=ACTBL2 PE=1 SV=2                      |
| 1    | 16.27 | 78.8    | 8   | 8/25             | K191k          | (R)DLTDYLMKILTER(G) | 1610.8458                       | 114.0545                   | 6.7                         | 41737.0/5.29       | HUMAN   | P60709      | Actin, cytoplasmic 1 OS=Homo sapiens GN=ACTB PE=1 SV=1                             |
| 1    | 16.27 | 78.8    | 8   | 8/25             | K193k          | (R)DLTDYLMKILTER(G) | 1610.8458                       | 114.0545                   | 6.7                         | 42019.2/5.23       | HUMAN   | P68032      | Actin, alpha cardiac muscle 1 OS=Homo sapiens GN=ACTC1 PE=1 SV=1                   |
| 1    | 16.27 | 78.8    | 8   | 8/25             | K191k          | (R)DLTDYLMKILTER(G) | 1610.8458                       | 114.0545                   | 6.7                         | 41793.1/5.31       | HUMAN   | P63261      | Actin, cytoplasmic 2 OS=Homo sapiens GN=ACTG1 PE=1 SV=1                            |
| 1    | 16.27 | 78.8    | 8   | 8/25             | K192k          | (R)DLTDYLMKILTER(G) | 1610.8458                       | 114.0545                   | 6.7                         | 41877.1/5.31       | HUMAN   | P63267      | Actin, gamma-enteric smooth muscle OS=Homo sapiens GN=ACTG2 PE=1 SV=1              |
| 1    | 16.27 | 78.8    | 8   | 8/25             | K193k          | (R)DLTDYLMKILTER(G) | 1610.8458                       | 114.0545                   | 6.7                         | 42051.3/5.23       | HUMAN   | P68133      | Actin, alpha skeletal muscle OS=Homo sapiens GN=ACTA1 PE=1 SV=1                    |
| 2    | 8.61  | 68.9    | 2   | 12/25            | None           | (R)LDLAVRYESKFER(L) | 1724.9330                       | -0.0326                    | -18.9                       | 42324.7/8.65       | HUMAN   | RQ8IUS5     | REVERSE Abhydrolase domain-containing protein 7 OS=Homo sapiens GN=ABHD7 PE=2 SV=2 |

Detailed Results

| Rank | Score | SPI (%) | BCS | # Unmatched Ions | Variable sites | Sequence                                      | MH <sup>+</sup> Calculated (Da) | MH <sup>+</sup> Error (Da) | MH <sup>+</sup> Error (ppm) | Protein MW/pl (Da) | Species | Accession # | MS-Digest Index # | Protein Name                                                          |
|------|-------|---------|-----|------------------|----------------|-----------------------------------------------|---------------------------------|----------------------------|-----------------------------|--------------------|---------|-------------|-------------------|-----------------------------------------------------------------------|
| 1    | 16.27 | 78.8    | 8   | 8/25             | K193k          | (R) D L I T D Y L M / k / I / L / T E / R (G) | 1610.8458                       | 114.0545                   | 6.7                         | 42009.2/5.24       | HUMAN   | P62736      | 12247             | Actin, aortic smooth muscle OS=Homo sapiens GN=ACTA2 PE=1 SV=1        |
| 1    | 16.27 | 78.8    | 8   | 8/25             | K192k          | (R) D L I T D Y L M / k / I / L / T E / R (G) | 1610.8458                       | 114.0545                   | 6.7                         | 42003.4/5.39       | HUMAN   | Q562R1      | 12273             | Beta-actin-like protein 2 OS=Homo sapiens GN=ACTBL2 PE=1 SV=2         |
| 1    | 16.27 | 78.8    | 8   | 8/25             | K191k          | (R) D L I T D Y L M / k / I / L / T E / R (G) | 1610.8458                       | 114.0545                   | 6.7                         | 41737.0/5.29       | HUMAN   | P60709      | 12305             | Actin, cytoplasmic 1 OS=Homo sapiens GN=ACTB PE=1 SV=1                |
| 1    | 16.27 | 78.8    | 8   | 8/25             | K193k          | (R) D L I T D Y L M / k / I / L / T E / R (G) | 1610.8458                       | 114.0545                   | 6.7                         | 42019.2/5.23       | HUMAN   | P68032      | 12371             | Actin, alpha cardiac muscle 1 OS=Homo sapiens GN=ACTC1 PE=1 SV=1      |
| 1    | 16.27 | 78.8    | 8   | 8/25             | K191k          | (R) D L I T D Y L M / k / I / L / T E / R (G) | 1610.8458                       | 114.0545                   | 6.7                         | 41793.1/5.31       | HUMAN   | P63261      | 12403             | Actin, cytoplasmic 2 OS=Homo sapiens GN=ACTG1 PE=1 SV=1               |
| 1    | 16.27 | 78.8    | 8   | 8/25             | K192k          | (R) D L I T D Y L M / k / I / L / T E / R (G) | 1610.8458                       | 114.0545                   | 6.7                         | 41877.1/5.31       | HUMAN   | P63267      | 12441             | Actin, gamma-enteric smooth muscle OS=Homo sapiens GN=ACTG2 PE=1 SV=1 |
| 1    | 16.27 | 78.8    | 8   | 8/25             | K193k          | (R) D L I T D Y L M / k / I / L / T E / R (G) | 1610.8458                       | 114.0545                   | 6.7                         | 42051.3/5.23       | HUMAN   | P68133      | 12707             | Actin, alpha skeletal muscle OS=Homo sapiens GN=ACTA1 PE=1 SV=1       |

  

| Fragment-ion (m/z)     | 72.081 | 84.079 | 86.096 | 129.101 | 136.074 | 141.094 | 175.118 | 183.119 | 201.122 | 202.127 | 229.120 | 249.156 | 328.229 | 363.190 | 380.139 | 391.226 | 405.208 | 500.278 | 518.295 | 600.334 | 631.379 | 640.843 | 748.887 <sup>+2</sup> | 873.519 | 1004.573 |
|------------------------|--------|--------|--------|---------|---------|---------|---------|---------|---------|---------|---------|---------|---------|---------|---------|---------|---------|---------|---------|---------|---------|---------|-----------------------|---------|----------|
| Frac. Inten.(% of TIC) | 1.25   | 9.07   | 0.36   | 0.04    | 0.31    | 1.45    | 5.70    | 1.76    | 23.55   | 1.68    | 3.06    | 2.73    | 1.40    | 1.47    | 3.61    | 1.80    | 8.31    | 2.50    | 7.93    | 1.51    | 6.69    | 2.25    | 3.77                  | 3.71    | 4.10     |
| Rel. Inten.(% of BP)   | 5.30   | 38.52  | 1.53   | 0.16    | 1.31    | 6.17    | 24.20   | 7.47    | 100.00  | 7.12    | 13.00   | 11.59   | 5.95    | 6.25    | 15.32   | 7.66    | 35.27   | 10.63   | 33.66   | 6.40    | 28.41   | 9.55    | 16.01                 | 15.74   | 17.42    |
| Score                  | -0.05  | -0.39  |        | 0.22    | 0.20    | 1.00    | -0.06   | 1.50    | -0.07   | 0.50    | -0.07   | 0.50    | -0.12   | 0.75    | -0.06   | 0.75    | -0.08   | 1.50    | 0.50    | 1.50    | 0.75    | 1.50    | 1.50                  | 1.50    | 1.50     |
| Ion-type               |        |        | LI     |         | RKQ     | Y       |         | y1      | a2      |         | b2      |         | ILT     |         | TDY     |         |         | y3      | y4+H2O  | y4      | MkIL    | y5      | y11 <sup>+2</sup>     | y6      | y7       |
| Delta ppm              |        |        | -8.4   |         | -10.4   | -12.4   |         | -8.3    | -11.3   |         | 4.4     |         | 15.3    |         | -20.6   |         |         | -3.5    | -8.6    | 3.1     | -34.6   | 2.8     | -18.7                 | -7.0    | 4.8      |

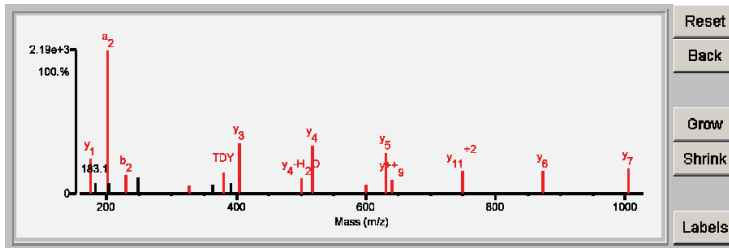

Result Summary

| Rank | Score | SPI (%) | BCS | # Unmatched ions | Variable sites | Sequence            | MH <sup>+</sup> Calculated (Da) | MH <sup>+</sup> Error (Da) | MH <sup>+</sup> Error (ppm) | Protein MW/pI (Da) | Species | Accession # | Protein Name                                                          |
|------|-------|---------|-----|------------------|----------------|---------------------|---------------------------------|----------------------------|-----------------------------|--------------------|---------|-------------|-----------------------------------------------------------------------|
| 1    | 13.37 | 80.6    | 5   | 6/25             | K328k          | (K)EITALAPSTMkIK(I) | 1402.7974                       | 114.0493                   | 4.2                         | 42009.2/5.24       | HUMAN   | P62736      | Actin, aortic smooth muscle OS=Homo sapiens GN=ACTA2 PE=1 SV=1        |
| 1    | 13.37 | 80.6    | 5   | 6/25             | K326k          | (K)EITALAPSTMkIK(I) | 1402.7974                       | 114.0493                   | 4.2                         | 41737.0/5.29       | HUMAN   | P60709      | Actin, cytoplasmic 1 OS=Homo sapiens GN=ACTB PE=1 SV=1                |
| 1    | 13.37 | 80.6    | 5   | 6/25             | K328k          | (K)EITALAPSTMkIK(I) | 1402.7974                       | 114.0493                   | 4.2                         | 42019.2/5.23       | HUMAN   | P68032      | Actin, alpha cardiac muscle 1 OS=Homo sapiens GN=ACTC1 PE=1 SV=1      |
| 1    | 13.37 | 80.6    | 5   | 6/25             | K326k          | (K)EITALAPSTMkIK(I) | 1402.7974                       | 114.0493                   | 4.2                         | 41793.1/5.31       | HUMAN   | P63261      | Actin, cytoplasmic 2 OS=Homo sapiens GN=ACTG1 PE=1 SV=1               |
| 1    | 13.37 | 80.6    | 5   | 6/25             | K327k          | (K)EITALAPSTMkIK(I) | 1402.7974                       | 114.0493                   | 4.2                         | 41877.1/5.31       | HUMAN   | P63267      | Actin, gamma-enteric smooth muscle OS=Homo sapiens GN=ACTG2 PE=1 SV=1 |
| 1    | 13.37 | 80.6    | 5   | 6/25             | K328k          | (K)EITALAPSTMkIK(I) | 1402.7974                       | 114.0493                   | 4.2                         | 42051.3/5.23       | HUMAN   | P68133      | Actin, alpha skeletal muscle OS=Homo sapiens GN=ACTA1 PE=1 SV=1       |
| 2    | 10.04 | 70.1    | 4   | 8/25             | K330k          | (K)EITALAPSTMkIK(I) | 1402.7974                       | 114.0493                   | 4.2                         | 42009.2/5.24       | HUMAN   | P62736      | Actin, aortic smooth muscle OS=Homo sapiens GN=ACTA2 PE=1 SV=1        |

Detailed Results

| Rank | Score | SPI (%) | BCS | # Unmatched ions | Variable sites | Sequence            | MH <sup>+</sup> Calculated (Da) | MH <sup>+</sup> Error (Da) | MH <sup>+</sup> Error (ppm) | Protein MW/pI (Da) | Species | Accession # | MS-Digest Index # | Protein Name                                                          |
|------|-------|---------|-----|------------------|----------------|---------------------|---------------------------------|----------------------------|-----------------------------|--------------------|---------|-------------|-------------------|-----------------------------------------------------------------------|
| 1    | 13.37 | 80.6    | 5   | 6/25             | K328k          | (K)EITALAPSTMkIK(I) | 1402.7974                       | 114.0493                   | 4.2                         | 42009.2/5.24       | HUMAN   | P62736      | 12247             | Actin, aortic smooth muscle OS=Homo sapiens GN=ACTA2 PE=1 SV=1        |
| 1    | 13.37 | 80.6    | 5   | 6/25             | K326k          | (K)EITALAPSTMkIK(I) | 1402.7974                       | 114.0493                   | 4.2                         | 41737.0/5.29       | HUMAN   | P60709      | 12305             | Actin, cytoplasmic 1 OS=Homo sapiens GN=ACTB PE=1 SV=1                |
| 1    | 13.37 | 80.6    | 5   | 6/25             | K328k          | (K)EITALAPSTMkIK(I) | 1402.7974                       | 114.0493                   | 4.2                         | 42019.2/5.23       | HUMAN   | P68032      | 12371             | Actin, alpha cardiac muscle 1 OS=Homo sapiens GN=ACTC1 PE=1 SV=1      |
| 1    | 13.37 | 80.6    | 5   | 6/25             | K326k          | (K)EITALAPSTMkIK(I) | 1402.7974                       | 114.0493                   | 4.2                         | 41793.1/5.31       | HUMAN   | P63261      | 12403             | Actin, cytoplasmic 2 OS=Homo sapiens GN=ACTG1 PE=1 SV=1               |
| 1    | 13.37 | 80.6    | 5   | 6/25             | K327k          | (K)EITALAPSTMkIK(I) | 1402.7974                       | 114.0493                   | 4.2                         | 41877.1/5.31       | HUMAN   | P63267      | 12441             | Actin, gamma-enteric smooth muscle OS=Homo sapiens GN=ACTG2 PE=1 SV=1 |
| 1    | 13.37 | 80.6    | 5   | 6/25             | K328k          | (K)EITALAPSTMkIK(I) | 1402.7974                       | 114.0493                   | 4.2                         | 42051.3/5.23       | HUMAN   | P68133      | 12707             | Actin, alpha skeletal muscle OS=Homo sapiens GN=ACTA1 PE=1 SV=1       |

| Fragment-ion (m/z)      | 70.065 | 74.061           | 84.081 | 86.096 | 120.080 | 129.065 | 141.101 | 145.096 | 157.127             | 173.091 | 185.125 | 197.128             | 199.181 | 215.140             | 286.169          | 308.169 | 326.170 | 356.229 | 379.195 | 397.209 | 459.758 <sup>+2</sup> | 633.375 | 734.423 | 821.456 | 918.506 |
|-------------------------|--------|------------------|--------|--------|---------|---------|---------|---------|---------------------|---------|---------|---------------------|---------|---------------------|------------------|---------|---------|---------|---------|---------|-----------------------|---------|---------|---------|---------|
| Frac. Inten. (% of TIC) | 0.02   | 7.35             | 0.48   | 0.63   | 2.92    | 0.20    | 2.40    | 5.34    | 3.91                | 6.21    | 3.77    | 6.88                | 2.46    | 7.72                | 4.19             | 4.90    | 7.04    | 3.07    | 2.84    | 4.06    | 9.69                  | 2.88    | 2.88    | 3.33    | 4.83    |
| Rel. Inten. (% of BP)   | 0.17   | 75.85            | 4.95   | 6.51   | 30.19   | 2.09    | 24.81   | 55.16   | 40.32               | 64.14   | 38.94   | 71.05               | 25.39   | 79.64               | 43.22            | 50.58   | 72.67   | 31.67   | 29.34   | 41.95   | 100.00                | 29.69   | 29.69   | 34.35   | 49.87   |
| Score                   | 0.20   | 1.50             | 0.50   | 0.22   | -0.30   | 0.20    | -0.25   | 0.50    | -0.40               | 0.75    | 0.75    | 0.50                | -0.25   | 0.75                | 0.75             | -0.51   | 0.25    | 0.75    | -0.29   | 0.25    | 1.50                  | 1.50    | 1.50    | 1.50    | 1.50    |
| Ion-type                | PR     | y <sup>++1</sup> | KQ     | LI     | QKR     | TA-28   | TA      | LA      | IT-H <sub>2</sub> O | a2      | TAL     | b3-H <sub>2</sub> O | kl      | b4-H <sub>2</sub> O | y7 <sup>+2</sup> | y4      | y5      | y6      | y7      |         |                       |         |         |         |         |
| Delta ppm               | 1.1    | 11.6             | -2.1   | -3.8   | -5.8    | -12.1   | -10.2   | -24.0   | -10.2               | -19     | -27.7   | -6.3                | -2.3    | -1.2                | 1.1              | 0.4     | 0.1     | 0.8     | -1.8    |         |                       |         |         |         |         |

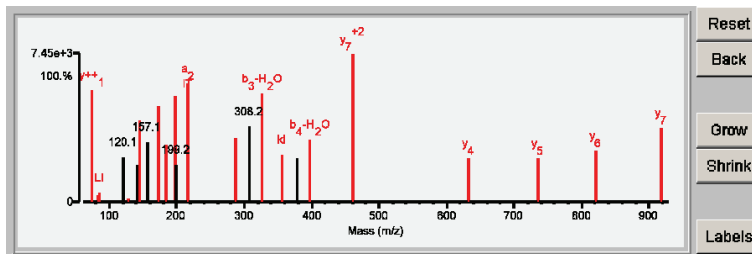

Result Summary

| Rank | Score | SPI (%) | BCS | # Unmatched Ions | Variable sites | Sequence        | MH <sup>+</sup> Calculated (Da) | MH <sup>+</sup> Error (Da) | MH <sup>+</sup> Error (ppm) | Protein MW/PI (Da) | Species | Accession # | Protein Name                                                          |
|------|-------|---------|-----|------------------|----------------|-----------------|---------------------------------|----------------------------|-----------------------------|--------------------|---------|-------------|-----------------------------------------------------------------------|
| 1    | 11.50 | 63.6    | 6   | 11/25            | K330k          | (K)IKIAPPERR(K) | 1036.6513                       | 114.0526                   | 8.4                         | 42009.2/5.24       | HUMAN   | P62736      | Actin, aortic smooth muscle OS=Homo sapiens GN=ACTA2 PE=1 SV=1        |
| 1    | 11.50 | 63.6    | 6   | 11/25            | K329k          | (K)IKIAPPERR(K) | 1036.6513                       | 114.0526                   | 8.4                         | 42003.4/5.39       | HUMAN   | Q562R1      | Beta-actin-like protein 2 OS=Homo sapiens GN=ACTBL2 PE=1 SV=2         |
| 1    | 11.50 | 63.6    | 6   | 11/25            | K328k          | (K)IKIAPPERR(K) | 1036.6513                       | 114.0526                   | 8.4                         | 41737.0/5.29       | HUMAN   | P60709      | Actin, cytoplasmic 1 OS=Homo sapiens GN=ACTB PE=1 SV=1                |
| 1    | 11.50 | 63.6    | 6   | 11/25            | K330k          | (K)IKIAPPERR(K) | 1036.6513                       | 114.0526                   | 8.4                         | 42019.2/5.23       | HUMAN   | P68032      | Actin, alpha cardiac muscle 1 OS=Homo sapiens GN=ACTC1 PE=1 SV=1      |
| 1    | 11.50 | 63.6    | 6   | 11/25            | K328k          | (K)IKIAPPERR(K) | 1036.6513                       | 114.0526                   | 8.4                         | 41793.1/5.31       | HUMAN   | P63261      | Actin, cytoplasmic 2 OS=Homo sapiens GN=ACTG1 PE=1 SV=1               |
| 1    | 11.50 | 63.6    | 6   | 11/25            | K329k          | (K)IKIAPPERR(K) | 1036.6513                       | 114.0526                   | 8.4                         | 41877.1/5.31       | HUMAN   | P63267      | Actin, gamma-enteric smooth muscle OS=Homo sapiens GN=ACTG2 PE=1 SV=1 |
| 1    | 11.50 | 63.6    | 6   | 11/25            | K330k          | (K)IKIAPPERR(K) | 1036.6513                       | 114.0526                   | 8.4                         | 42051.3/5.23       | HUMAN   | P68133      | Actin, alpha skeletal muscle OS=Homo sapiens GN=ACTA1 PE=1 SV=1       |

Detailed Results

| Rank | Score | SPI (%) | BCS | # Unmatched Ions | Variable sites | Sequence        | MH <sup>+</sup> Calculated (Da) | MH <sup>+</sup> Error (Da) | MH <sup>+</sup> Error (ppm) | Protein MW/PI (Da) | Species | Accession # | MS-Digest Index # | Protein Name                                                          |
|------|-------|---------|-----|------------------|----------------|-----------------|---------------------------------|----------------------------|-----------------------------|--------------------|---------|-------------|-------------------|-----------------------------------------------------------------------|
| 1    | 11.50 | 63.6    | 6   | 11/25            | K330k          | (K)IKIAPPERR(K) | 1036.6513                       | 114.0526                   | 8.4                         | 42009.2/5.24       | HUMAN   | P62736      | 6124              | Actin, aortic smooth muscle OS=Homo sapiens GN=ACTA2 PE=1 SV=1        |
| 1    | 11.50 | 63.6    | 6   | 11/25            | K329k          | (K)IKIAPPERR(K) | 1036.6513                       | 114.0526                   | 8.4                         | 42003.4/5.39       | HUMAN   | Q562R1      | 6137              | Beta-actin-like protein 2 OS=Homo sapiens GN=ACTBL2 PE=1 SV=2         |
| 1    | 11.50 | 63.6    | 6   | 11/25            | K328k          | (K)IKIAPPERR(K) | 1036.6513                       | 114.0526                   | 8.4                         | 41737.0/5.29       | HUMAN   | P60709      | 6153              | Actin, cytoplasmic 1 OS=Homo sapiens GN=ACTB PE=1 SV=1                |
| 1    | 11.50 | 63.6    | 6   | 11/25            | K330k          | (K)IKIAPPERR(K) | 1036.6513                       | 114.0526                   | 8.4                         | 42019.2/5.23       | HUMAN   | P68032      | 6186              | Actin, alpha cardiac muscle 1 OS=Homo sapiens GN=ACTC1 PE=1 SV=1      |
| 1    | 11.50 | 63.6    | 6   | 11/25            | K328k          | (K)IKIAPPERR(K) | 1036.6513                       | 114.0526                   | 8.4                         | 41793.1/5.31       | HUMAN   | P63261      | 6202              | Actin, cytoplasmic 2 OS=Homo sapiens GN=ACTG1 PE=1 SV=1               |
| 1    | 11.50 | 63.6    | 6   | 11/25            | K329k          | (K)IKIAPPERR(K) | 1036.6513                       | 114.0526                   | 8.4                         | 41877.1/5.31       | HUMAN   | P63267      | 6221              | Actin, gamma-enteric smooth muscle OS=Homo sapiens GN=ACTG2 PE=1 SV=1 |
| 1    | 11.50 | 63.6    | 6   | 11/25            | K330k          | (K)IKIAPPERR(K) | 1036.6513                       | 114.0526                   | 8.4                         | 42051.3/5.23       | HUMAN   | P68133      | 6354              | Actin, alpha skeletal muscle OS=Homo sapiens GN=ACTA1 PE=1 SV=1       |

| Fragment-ion (m/z)      | 69.069 | 70.065 | 84.081 | 86.097 | 116.068 | 120.080 | 129.102 | 141.101 | 157.135 | 175.118 | 199.104 | 201.118 | 214.117 | 227.099 | 249.638 | 271.138 | 310.219 | 338.221 | 341.192 | 356.224 | 401.216 | 469.315 | 498.270 | 540.358 | 569.316 |
|-------------------------|--------|--------|--------|--------|---------|---------|---------|---------|---------|---------|---------|---------|---------|---------|---------|---------|---------|---------|---------|---------|---------|---------|---------|---------|---------|
| Frac. Inten. (% of TIC) | 2.09   | 0.02   | 16.16  | 19.14  | 1.53    | 1.47    | 0.07    | 2.59    | 1.44    | 8.52    | 1.66    | 1.42    | 1.40    | 1.76    | 2.42    | 2.17    | 3.02    | 2.34    | 2.23    | 3.24    | 9.92    | 3.02    | 7.47    | 2.28    | 2.61    |
| Rel. Inten. (% of BP)   | 10.90  | 0.11   | 84.41  | 100.00 | 7.99    | 7.66    | 0.39    | 13.55   | 7.52    | 44.52   | 8.66    | 7.43    | 7.32    | 9.21    | 12.62   | 11.35   | 15.80   | 12.24   | 11.63   | 16.93   | 51.82   | 15.79   | 39.03   | 11.93   | 13.66   |
| Score                   | -0.11  | 0.20   | -0.84  | 0.50   | -0.08   | -0.08   | 0.20    | -0.14   | -0.08   | 1.50    | 0.50    | 1.50    | -0.07   | 0.75    | 1.50    | -0.11   | -0.16   | -0.12   | -0.12   | 0.75    | 1.50    | 0.75    | 1.50    | 0.75    | 1.50    |
| Ion-type                |        | PR     |        | a1     |         |         | RKQ     |         |         | y1      | PE-28   | y++3    |         | PE      | y++4    |         |         |         |         | b2      | y3      | b3      | y4      | kIIA    | y5      |
| Delta ppm               |        | -1.8   |        |        | -9.6    |         | 1.2     |         |         | -7.1    | -23.2   | 37.3    |         | -21.3   | 2.9     |         |         |         |         | -17.2   | 3.0     | 1.7     | 5.3     | 12.8    | 20.6    |
|                         |        |        |        |        | 0.50    |         |         |         |         |         |         |         |         |         |         |         |         |         |         | -17.2   |         | 1.7     |         |         |         |
|                         |        |        |        |        | 3.2     |         |         |         |         |         |         |         |         |         |         |         |         |         |         |         |         |         |         |         |         |

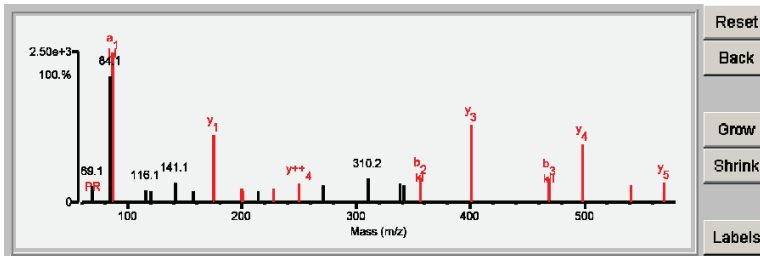



Result Summary

| Rank | Score | SPI (%) | BCS | # Unmatched Ions | Variable sites | Sequence                     | MH <sup>+</sup> Calculated (Da) | MH <sup>+</sup> Error (Da) | MH <sup>+</sup> Error (ppm) | Protein MW/pI (Da) | Species | Accession # | Protein Name                                                  |
|------|-------|---------|-----|------------------|----------------|------------------------------|---------------------------------|----------------------------|-----------------------------|--------------------|---------|-------------|---------------------------------------------------------------|
| 1    | 13.67 | 78.9    | 4   | 7/25             | K113k          | (R)VAPEEHPVLLTEAPLNPKNR(E)   | 2295.2456                       | 114.0674                   | 10.2                        | 41737.0/5.29       | HUMAN   | P60709      | Actin, cytoplasmic 1 OS=Homo sapiens GN=ACTB PE=1 SV=1        |
| 1    | 13.67 | 78.9    | 4   | 7/25             | K113k          | (R)VAPEEHPVLLTEAPLNPKNR(E)   | 2295.2456                       | 114.0674                   | 10.2                        | 41793.1/5.31       | HUMAN   | P63261      | Actin, cytoplasmic 2 OS=Homo sapiens GN=ACTG1 PE=1 SV=1       |
| 2    | 5.89  | 60.9    | 1   | 11/25            | K351k          | (K)VEDVSAVEIVGGATRIPAWKER(I) | 2295.2667                       | 114.0463                   | 1.4                         | 96865.5/5.28       | HUMAN   | Q92598      | Heat shock protein 105 kDa OS=Homo sapiens GN=HSPH1 PE=1 SV=1 |

Detailed Results

| Rank | Score | SPI (%) | BCS | # Unmatched Ions | Variable sites | Sequence                   | MH <sup>+</sup> Calculated (Da) | MH <sup>+</sup> Error (Da) | MH <sup>+</sup> Error (ppm) | Protein MW/pI (Da) | Species | Accession # | MS-Digest Index # | Protein Name                                            |
|------|-------|---------|-----|------------------|----------------|----------------------------|---------------------------------|----------------------------|-----------------------------|--------------------|---------|-------------|-------------------|---------------------------------------------------------|
| 1    | 13.67 | 78.9    | 4   | 7/25             | K113k          | (R)VAPEEHPVLLTEAPLNPKNR(E) | 2295.2456                       | 114.0674                   | 10.2                        | 41737.0/5.29       | HUMAN   | P60709      | 12305             | Actin, cytoplasmic 1 OS=Homo sapiens GN=ACTB PE=1 SV=1  |
| 1    | 13.67 | 78.9    | 4   | 7/25             | K113k          | (R)VAPEEHPVLLTEAPLNPKNR(E) | 2295.2456                       | 114.0674                   | 10.2                        | 41793.1/5.31       | HUMAN   | P63261      | 12403             | Actin, cytoplasmic 2 OS=Homo sapiens GN=ACTG1 PE=1 SV=1 |

  

| Fragment-ion (m/z)      | 70.065 | 72.079         | 84.080 | 86.096 | 102.052        | 143.116        | 171.112 | 183.150 | 211.145 | 302.131 | 325.186                 | 331.169 <sup>+2</sup>        | 350.202 <sup>+2</sup>        | 401.716 <sup>+2</sup> | 493.214 | 500.272 | 504.274 <sup>+2</sup> | 512.293 <sup>+2</sup>        | 573.279 <sup>+2</sup> | 608.804 <sup>+2</sup> | 689.340 | 699.390        | 813.436        | 1023.567       | 1216.629 |
|-------------------------|--------|----------------|--------|--------|----------------|----------------|---------|---------|---------|---------|-------------------------|------------------------------|------------------------------|-----------------------|---------|---------|-----------------------|------------------------------|-----------------------|-----------------------|---------|----------------|----------------|----------------|----------|
| Frac. Inten. (% of TIC) | 0.01   | 0.49           | 4.65   | 0.18   | 0.09           | 9.77           | 4.02    | 3.43    | 2.75    | 2.75    | 3.83                    | 4.33                         | 8.40                         | 4.89                  | 3.81    | 2.96    | 2.37                  | 7.87                         | 2.92                  | 3.02                  | 3.94    | 11.22          | 4.44           | 4.23           | 3.65     |
| Rel. Inten. (% of BP)   | 0.11   | 4.34           | 41.42  | 1.57   | 0.78           | 87.08          | 35.80   | 30.58   | 24.48   | 24.47   | 34.18                   | 38.55                        | 74.86                        | 43.55                 | 33.97   | 26.40   | 21.09                 | 70.14                        | 26.02                 | 26.94                 | 35.12   | 100.00         | 39.55          | 37.72          | 32.55    |
| Score                   | 0.20   | 0.50           | -0.29  | 0.22   | 1.00           | 0.50           | 0.50    | 0.50    | 0.75    | 0.75    | 0.75                    | 0.50                         | 1.50                         | -0.30                 | 0.75    | 0.75    | -0.18                 | 1.50                         | -0.18                 | -0.19                 | 0.75    | 1.50           | 1.50           | 1.50           | -0.22    |
| Ion-type                | PR     | a <sub>1</sub> | LI     | E      | a <sub>2</sub> | b <sub>2</sub> | PL-28   | PL      | TEA     | LNP     | PEEHPV-28 <sup>+2</sup> | y <sub>5</sub> <sup>+2</sup> | y <sub>6</sub> <sup>+2</sup> | EEHP                  |         |         |                       | y <sub>8</sub> <sup>+2</sup> |                       |                       | PEEHPV  | y <sub>5</sub> | y <sub>6</sub> | y <sub>8</sub> |          |
| Delta ppm               | -3.2   | -35.7          | 0.50   | -10.8  | -30.9          | -18.8          | -9.9    | -3.8    | -2.8    | -16.4   | -5.3                    | 0.0                          | 10.1                         |                       | 18.0    |         |                       | 9.1                          |                       |                       | 19.6    | 0.4            | 4.7            | -2.8           |          |

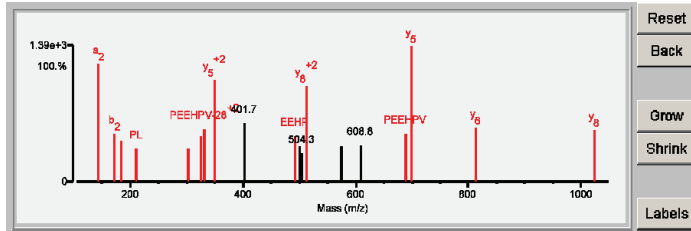



Result Summary

| Rank | Score | SPI (%) | BCS | # Unmatched Ions | Variable sites | Sequence                    | MH <sup>+</sup> Calculated (Da) | MH <sup>+</sup> Error (Da) | MH <sup>+</sup> Error (ppm) | Protein MW (Da) | Species | Accession # | Protein Name                                         |
|------|-------|---------|-----|------------------|----------------|-----------------------------|---------------------------------|----------------------------|-----------------------------|-----------------|---------|-------------|------------------------------------------------------|
| 1    | 14.06 | 75.6    | 8   | 7/25             | K196k K209k    | (K)EKGSTLDLSDLEAEKLVMFQR(R) | 2409.2330                       | 228.1152                   | 11.1                        | 41522.9/9.07    | HUMAN   | O00767      | Acyl-CoA desaturase OS=Homo sapiens GN=SCD PE=1 SV=2 |

Detailed Results

| Rank | Score | SPI (%) | BCS | # Unmatched Ions | Variable sites | Sequence                                                     | MH <sup>+</sup> Calculated (Da) | MH <sup>+</sup> Error (Da) | MH <sup>+</sup> Error (ppm) | Protein MW (Da) | Species | Accession # | MS-Digest Index # | Protein Name                                         |
|------|-------|---------|-----|------------------|----------------|--------------------------------------------------------------|---------------------------------|----------------------------|-----------------------------|-----------------|---------|-------------|-------------------|------------------------------------------------------|
| 1    | 14.06 | 75.6    | 8   | 7/25             | K196k K209k    | (K)E K G S T L D L S / D L E A E K / L / V / M / F Q / R (R) | 2409.2330                       | 228.1152                   | 11.1                        | 41522.9/9.07    | HUMAN   | O00767      | 8933              | Acyl-CoA desaturase OS=Homo sapiens GN=SCD PE=1 SV=2 |

  

| Fragment-ion (m/z)      | 70.064 | 72.079 | 84.081 | 86.096 | 120.078 | 132.080 | 175.117 | 201.128 | 229.119 | 233.165 | 314.168 | 356.232 | 450.240 | 460.214 | 497.260 | 558.255 <sup>+2</sup> | 568.198 | 581.277 | 617.282 | 654.134 <sup>+2</sup> | 680.375 | 793.434 | 796.920 <sup>+2</sup> | 827.397 | 845.399 |
|-------------------------|--------|--------|--------|--------|---------|---------|---------|---------|---------|---------|---------|---------|---------|---------|---------|-----------------------|---------|---------|---------|-----------------------|---------|---------|-----------------------|---------|---------|
| Frac. Inten. (% of TIC) | 0.00   | 0.36   | 0.40   | 0.97   | 0.09    | 2.76    | 3.34    | 4.25    | 2.93    | 3.19    | 5.35    | 3.50    | 10.19   | 2.89    | 5.27    | 3.55                  | 3.30    | 15.20   | 3.47    | 3.48                  | 6.97    | 5.62    | 3.79                  | 2.79    | 6.33    |
| Rel. Inten. (% of BP)   | 0.02   | 2.37   | 2.65   | 6.40   | 0.58    | 18.16   | 21.97   | 27.97   | 19.27   | 20.98   | 35.21   | 23.02   | 67.04   | 18.99   | 34.66   | 23.34                 | 21.73   | 100.00  | 22.85   | 22.91                 | 45.83   | 36.94   | 24.93                 | 18.38   | 41.66   |
| Score                   | 0.20   | 0.50   | 0.50   | 0.22   | 1.00    | -0.18   | 1.50    | 0.75    | 0.75    | -0.21   | 0.75    | 0.75    | 1.50    | -0.19   | -0.35   | -0.23                 | -0.22   | 1.50    | 0.50    | -0.23                 | 1.50    | 1.50    | 1.50                  | 0.25    | 0.50    |
| Ion-type                | PR     | V      | KQ     | LI     | F       |         | y1      | LS      | DL      |         | LEA     | kL      | y3      |         |         |                       |         | y4      | b5      |                       | y5      | y6      | y12 <sup>+2</sup>     | b7-H2O  | b7      |
| Delta ppm               | -17.5  | -21.9  | 0.3    | -4.9   | -23.9   |         | -11.1   | 19.6    | -1.7    |         | -13.2   | 5.5     | -13.6   |         |         |                       |         | -16.9   | -13.3   |                       | 28.9    | -6.6    | 14.5                  | 7.6     | -2.4    |

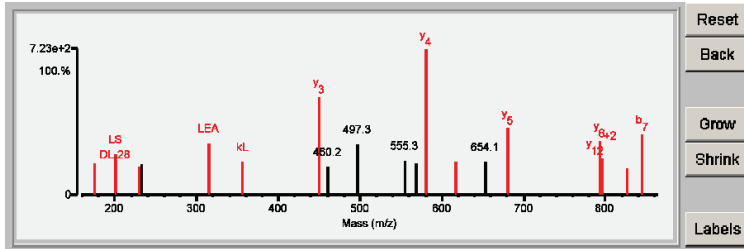

Result Summary

| Rank | Score | SPI (%) | BCS | # Unmatched Ions | Variable sites | Sequence                  | MH <sup>+</sup> Calculated (Da) | MH <sup>+</sup> Error (Da) | MH <sup>+</sup> Error (ppm) | Protein MW/pi (Da) | Species | Accession # | Protein Name                                         |
|------|-------|---------|-----|------------------|----------------|---------------------------|---------------------------------|----------------------------|-----------------------------|--------------------|---------|-------------|------------------------------------------------------|
| 1    | 19.65 | 80.6    | 11  | 5/25             | K209k          | (K)GSTLDLSDLEAEKLVMFQR(R) | 2152.0954                       | 114.0589                   | 7.0                         | 41522.9/9.07       | HUMAN   | O00767      | Acyl-CoA desaturase OS=Homo sapiens GN=SCD PE=1 SV=2 |

Detailed Results

| Rank | Score | SPI (%) | BCS | # Unmatched Ions | Variable sites | Sequence                                     | MH <sup>+</sup> Calculated (Da) | MH <sup>+</sup> Error (Da) | MH <sup>+</sup> Error (ppm) | Protein MW/pi (Da) | Species | Accession # | MS-Digest Index # | Protein Name                                         |         |                |         |                                  |                |         |                |                       |                       |                                                 |                       |                               |                               |                               |                               |                               |                               |                |      |      |      |      |      |
|------|-------|---------|-----|------------------|----------------|----------------------------------------------|---------------------------------|----------------------------|-----------------------------|--------------------|---------|-------------|-------------------|------------------------------------------------------|---------|----------------|---------|----------------------------------|----------------|---------|----------------|-----------------------|-----------------------|-------------------------------------------------|-----------------------|-------------------------------|-------------------------------|-------------------------------|-------------------------------|-------------------------------|-------------------------------|----------------|------|------|------|------|------|
| 1    | 19.65 | 80.6    | 11  | 5/25             | K209k          | (K)G S T/L/D/L/S D L E A E/k/L/V/M/F/Q/R (R) | 2152.0954                       | 114.0589                   | 7.0                         | 41522.9/9.07       | HUMAN   | O00767      | 8933              | Acyl-CoA desaturase OS=Homo sapiens GN=SCD PE=1 SV=2 |         |                |         |                                  |                |         |                |                       |                       |                                                 |                       |                               |                               |                               |                               |                               |                               |                |      |      |      |      |      |
|      |       |         |     |                  |                |                                              | 72.080                          | 74.060                     | 86.096                      | 175.116            | 201.117 | 214.118     | 228.096           | 229.112                                              | 303.178 | 316.156        | 341.176 | 450.241                          | 455.296        | 581.285 | 680.354        | 683.370 <sup>+3</sup> | 702.032 <sup>+3</sup> | 793.434                                         | 840.444 <sup>+2</sup> | 896.973 <sup>+2</sup>         | 950.996 <sup>+2</sup>         | 954.481 <sup>+2</sup>         | 1011.024 <sup>+2</sup>        | 1024.534                      | 1035.575                      |                |      |      |      |      |      |
|      |       |         |     |                  |                |                                              | Frac. Inten.(% of TIC)          | 0.08                       | 3.69                        | 0.22               | 2.58    | 2.63        | 3.57              | 6.34                                                 | 2.66    | 2.38           | 2.33    | 2.47                             | 4.03           | 2.69    | 8.76           | 5.19                  | 3.07                  | 4.70                                            | 3.50                  | 6.79                          | 4.82                          | 6.66                          | 12.34                         | 3.94                          | 2.37                          | 2.21           |      |      |      |      |      |
|      |       |         |     |                  |                |                                              | Rel. Inten.(% of BP)            | 0.63                       | 29.88                       | 1.75               | 20.95   | 21.31       | 28.96             | 51.38                                                | 21.58   | 19.29          | 18.86   | 20.05                            | 32.63          | 21.79   | 71.04          | 42.05                 | 24.88                 | 38.11                                           | 28.36                 | 55.01                         | 39.08                         | 53.97                         | 100.00                        | 31.93                         | 19.19                         | 17.93          |      |      |      |      |      |
|      |       |         |     |                  |                |                                              | Score                           | 0.50                       | -0.30                       | 0.22               | 1.50    | 0.75        | -0.29             | 0.25                                                 | 0.75    | 1.50           | 0.25    | 1.50                             | 0.75           | 1.50    | 0.75           | 1.50                  | 1.50                  | -0.25                                           | 0.50                  | 1.50                          | 1.50                          | 1.50                          | 1.50                          | 1.50                          | 1.50                          | 1.50           | 1.50 | 1.50 | 1.50 | 1.50 | 1.50 |
|      |       |         |     |                  |                |                                              | Ion-type                        | V                          |                             | LI                 | y1      | LS          |                   | b <sub>3</sub> -H <sub>2</sub> O                     | DL      | y <sub>2</sub> | SDL     | b <sub>4</sub> -H <sub>2</sub> O | y <sub>3</sub> | kLV     | y <sub>4</sub> | y <sub>5</sub>        |                       | y <sub>17</sub> -H <sub>2</sub> O <sup>+3</sup> | y <sub>6</sub>        | y <sub>13</sub> <sup>+2</sup> | y <sub>14</sub> <sup>+2</sup> | y <sub>15</sub> <sup>+2</sup> | y <sub>16</sub> <sup>+2</sup> | y <sub>15</sub> <sup>+2</sup> | y <sub>16</sub> <sup>+2</sup> | y <sub>7</sub> |      |      |      |      |      |
|      |       |         |     |                  |                |                                              | Delta ppm                       | -16.3                      |                             | -8.4               | -18.0   | -35.1       | -35.1             | -10.9                                                | -30.5   | 0.6            | 15.8    | -22.1                            | -10.8          | -5.1    | -2.3           | -0.8                  |                       | 3.5                                             | -6.7                  | 22.7                          | 22.7                          | 7.5                           | 1.0                           | 1.3                           | 1.3                           | -1.3           |      |      |      |      |      |

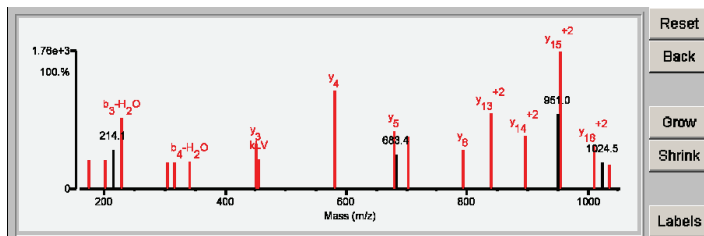

Result Summary

| Rank | Score | SPI (%) | BCS | # Unmatched Ions | Variable sites | Sequence                  | MH <sup>+</sup> Calculated (Da) | MH <sup>+</sup> Error (Da) | MH <sup>+</sup> Error (ppm) | Protein MW/pI (Da) | Species | Accession # | Protein Name                                         |
|------|-------|---------|-----|------------------|----------------|---------------------------|---------------------------------|----------------------------|-----------------------------|--------------------|---------|-------------|------------------------------------------------------|
| 1    | 12.98 | 66.2    | 6   | 11/25            | K12k           | (R)LLLLNNGAKMPLILGLTWK(S) | 1939.1198                       | 114.0535                   | 5.1                         | 35853.6/6.52       | HUMAN   | P15121      | Aldose reductase OS=Homo sapiens GN=AKR1B1 PE=1 SV=3 |

Detailed Results

| Rank | Score | SPI (%) | BCS | # Unmatched Ions | Variable sites | Sequence                                              | MH <sup>+</sup> Calculated (Da) | MH <sup>+</sup> Error (Da) | MH <sup>+</sup> Error (ppm) | Protein MW/pI (Da) | Species | Accession # | MS-Digest Index # | Protein Name                                         |         |         |         |         |         |                       |         |                       |         |         |         |                       |         |                       |                       |         |          |      |
|------|-------|---------|-----|------------------|----------------|-------------------------------------------------------|---------------------------------|----------------------------|-----------------------------|--------------------|---------|-------------|-------------------|------------------------------------------------------|---------|---------|---------|---------|---------|-----------------------|---------|-----------------------|---------|---------|---------|-----------------------|---------|-----------------------|-----------------------|---------|----------|------|
| 1    | 12.98 | 66.2    | 6   | 11/25            | K12k           | (R) L L L / N N G A k / M / P I / L / G L G T W K (S) | 1939.1198                       | 114.0535                   | 5.1                         | 35853.6/6.52       | HUMAN   | P15121      | 18937             | Aldose reductase OS=Homo sapiens GN=AKR1B1 PE=1 SV=3 |         |         |         |         |         |                       |         |                       |         |         |         |                       |         |                       |                       |         |          |      |
|      |       |         |     |                  |                | Fragment-ion (m/z)                                    | 70.063                          | 84.083                     | 86.095                      | 87.098             | 120.081 | 159.088     | 183.148           | 199.182                                              | 201.120 | 211.140 | 227.178 | 423.194 | 488.800 | 492.267 <sup>+2</sup> | 497.287 | 501.896 <sup>+3</sup> | 640.660 | 661.355 | 774.439 | 776.504 <sup>+2</sup> | 824.353 | 857.487 <sup>+2</sup> | 914.009 <sup>+2</sup> | 984.588 | 1115.619 |      |
|      |       |         |     |                  |                | Frac. Inten. (% of TIC)                               | 0.00                            | 0.18                       | 19.59                       | 4.53               | 2.31    | 0.07        | 6.05              | 6.89                                                 | 3.20    | 2.40    | 2.40    | 2.83    | 2.40    | 3.73                  | 3.74    | 2.51                  | 2.17    | 3.92    | 5.45    | 3.57                  | 2.82    | 3.48                  | 3.80                  | 9.81    | 2.17     |      |
|      |       |         |     |                  |                | Rel. Inten. (% of BP)                                 | 0.01                            | 0.92                       | 100.00                      | 23.10              | 11.78   | 0.35        | 30.88             | 35.19                                                | 16.32   | 12.24   | 12.23   | 14.42   | 12.27   | 19.02                 | 19.09   | 12.82                 | 11.07   | 20.03   | 27.84   | 18.22                 | 14.37   | 17.88                 | 19.41                 | 50.05   | 11.08    |      |
|      |       |         |     |                  |                | Score                                                 | 0.20                            | 0.50                       | 0.50                        | -0.23              | -0.12   | 2.00        | 0.50              | 0.50                                                 | -0.16   | 0.75    | 0.75    | -0.14   | -0.12   | -0.19                 | -0.19   | -0.13                 | -0.11   | 1.50    | 1.50    | 1.50                  | 1.50    | 1.50                  | 1.50                  | 1.50    | 1.50     | 1.50 |
|      |       |         |     |                  |                | Ion-type                                              | PR                              | KQ                         | a1                          |                    |         | W           | PI-28             | a2                                                   |         | PI      | b2      |         |         |                       |         |                       | y6      | y7      |         |                       |         | y15 <sup>+2</sup>     | y16 <sup>+2</sup>     | y9      | y10      |      |
|      |       |         |     |                  |                | Delta ppm                                             | -24.6                           | 30.0                       | -34.0                       |                    |         | -25.0       | -14.7             | 1.1                                                  | -24.6   | 7.5     | 7.5     | -17.5   | -15.7   |                       |         |                       | -17.5   | -15.7   |         |                       | 32.5    | 9.3                   | 0.2                   | -8.2    |          |      |

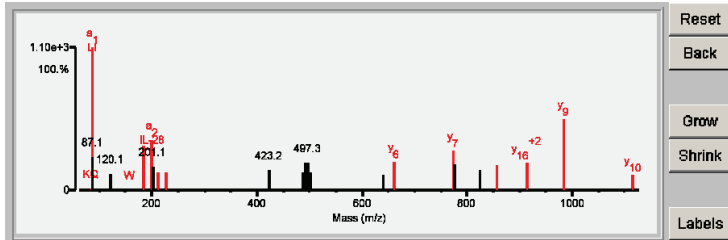

Reset  
Back  
Grow  
Shrink  
Labels

Result Summary

| Rank | Score | SPI (%) | BCS | # Unmatched Ions | Variable sites | Sequence                      | MH <sup>+</sup> Calculated (Da) | MH <sup>+</sup> Error (Da) | MH <sup>+</sup> Error (ppm) | Protein MW/pl (Da) | Species | Accession # | Protein Name                                                           |
|------|-------|---------|-----|------------------|----------------|-------------------------------|---------------------------------|----------------------------|-----------------------------|--------------------|---------|-------------|------------------------------------------------------------------------|
| 1    | 16.24 | 85.8    | 8   | 3/25             | K153k          | (K)AIAHYEQSADYYKGEESNSSANK(C) | 2562.1379                       | 114.0539                   | 4.1                         | 33232.9/5.23       | HUMAN   | P54920      | Alpha-soluble NSF attachment protein OS=Homo sapiens GN=NAPA PE=1 SV=3 |
| 1    | 16.24 | 85.8    | 8   | 3/25             | K153k          | (K)AIAHYEQSADYYKGEESNSSANK(C) | 2562.1379                       | 114.0539                   | 4.1                         | 33557.1/5.32       | HUMAN   | Q9H115      | Beta-soluble NSF attachment protein OS=Homo sapiens GN=NAPB PE=2 SV=2  |
| 2    | 7.07  | 62.6    | 5   | 8/25             | K163k          | (K)AIAHYEQSADYYKGEESNSSANK(C) | 2562.1379                       | 114.0539                   | 4.1                         | 33232.9/5.23       | HUMAN   | P54920      | Alpha-soluble NSF attachment protein OS=Homo sapiens GN=NAPA PE=1 SV=3 |
| 2    | 7.07  | 62.6    | 5   | 8/25             | K163k          | (K)AIAHYEQSADYYKGEESNSSANK(C) | 2562.1379                       | 114.0539                   | 4.1                         | 33557.1/5.32       | HUMAN   | Q9H115      | Beta-soluble NSF attachment protein OS=Homo sapiens GN=NAPB PE=2 SV=2  |

Detailed Results

| Rank | Score | SPI (%) | BCS | # Unmatched Ions | Variable sites | Sequence                      | MH <sup>+</sup> Calculated (Da) | MH <sup>+</sup> Error (Da) | MH <sup>+</sup> Error (ppm) | Protein MW/pl (Da) | Species | Accession # | MS-Digest Index # | Protein Name                                                           |
|------|-------|---------|-----|------------------|----------------|-------------------------------|---------------------------------|----------------------------|-----------------------------|--------------------|---------|-------------|-------------------|------------------------------------------------------------------------|
| 1    | 16.24 | 85.8    | 8   | 3/25             | K153k          | (K)AIAHYEQSADYYKGEESNSSANK(C) | 2562.1379                       | 114.0539                   | 4.1                         | 33232.9/5.23       | HUMAN   | P54920      | 361752            | Alpha-soluble NSF attachment protein OS=Homo sapiens GN=NAPA PE=1 SV=3 |
| 1    | 16.24 | 85.8    | 8   | 3/25             | K153k          | (K)AIAHYEQSADYYKGEESNSSANK(C) | 2562.1379                       | 114.0539                   | 4.1                         | 33557.1/5.32       | HUMAN   | Q9H115      | 361759            | Beta-soluble NSF attachment protein OS=Homo sapiens GN=NAPB PE=2 SV=2  |

  

| Fragment-ion (m/z)      | 60.043 | 84.045 | 84.080 | 86.094 | 129.101 | 136.076 | 157.131 | 209.098 | 350.135 | 372.168 | 400.151 <sup>+2</sup> | 406.213 <sup>+2</sup> | 419.219 | 429.204 | 441.716 <sup>+2</sup>                          | 506.252 | 569.265 | 620.291 | 632.787 <sup>+2</sup>         | 685.321 | 714.317 <sup>+2</sup>         | 882.402                          | 1004.424                          | 1022.431        | 1086.496        |
|-------------------------|--------|--------|--------|--------|---------|---------|---------|---------|---------|---------|-----------------------|-----------------------|---------|---------|------------------------------------------------|---------|---------|---------|-------------------------------|---------|-------------------------------|----------------------------------|-----------------------------------|-----------------|-----------------|
| Frac. Inten. (% of TIC) | 5.41   | 0.19   | 0.27   | 0.16   | 0.11    | 0.36    | 6.14    | 4.34    | 3.22    | 4.77    | 3.44                  | 5.33                  | 3.37    | 4.71    | 3.82                                           | 4.17    | 4.52    | 4.99    | 6.99                          | 5.12    | 4.77                          | 6.59                             | 3.86                              | 7.33            | 6.03            |
| Rel. Inten. (% of BP)   | 73.75  | 2.54   | 3.66   | 2.18   | 1.54    | 4.85    | 83.71   | 59.18   | 43.88   | 65.09   | 46.91                 | 72.67                 | 45.92   | 64.31   | 52.16                                          | 56.85   | 61.66   | 68.12   | 95.40                         | 69.87   | 65.01                         | 89.83                            | 52.62                             | 100.00          | 82.23           |
| Score                   | -0.74  | 1.00   | 0.50   | 0.22   | 1.00    | 0.50    | 0.75    | 0.75    | 0.75    | 0.75    | -0.47                 | -0.73                 | 1.50    | 0.75    | 0.25                                           | 1.50    | 0.75    | 1.50    | 1.50                          | 0.50    | 1.50                          | 0.25                             | 0.50                              | 1.50            | 0.50            |
| Ion-type                | E      | KQ     | LI     | RKQ    | Y       | a2      | AH      | ADY     | AHY     |         |                       |                       | y4      | kGE     | b <sub>8</sub> -H <sub>2</sub> O <sup>+2</sup> | y5      | YYk     | y6      | y <sub>11</sub> <sup>+2</sup> | b6      | y <sub>12</sub> <sup>+2</sup> | b <sub>8</sub> -H <sub>2</sub> O | y <sub>10</sub> -H <sub>2</sub> O | y <sub>10</sub> | b <sub>10</sub> |
| Delta ppm               |        | 6.1    | -11.6  | -27.0  | -6.5    | 5.2     | -21.9   | -30.6   | -1.0    | -0.1    |                       |                       | -13.5   | -13.8   | 15.6                                           | -9.1    | -14.8   | -14.9   | -7.2                          | -15.3   | -9.7                          | -10.7                            | -3.8                              | -7.7            | 9.4             |

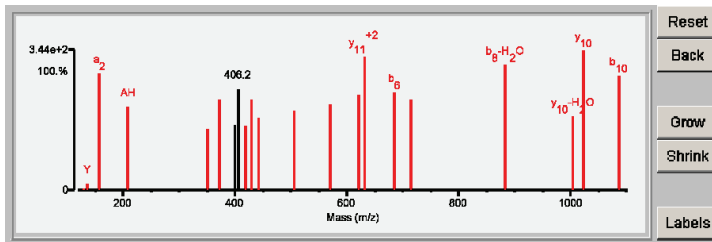

Reset

Back

Grow

Shrink

Labels

Result Summary

| Rank | Score | SPI (%) | BCS | # Unmatched Ions | Variable sites | Sequence                   | MH <sup>+</sup> Calculated (Da) | MH <sup>+</sup> Error (Da) | MH <sup>+</sup> Error (ppm) | Protein MW (kDa) | Species | Accession #             | Protein Name                                                                                                            |
|------|-------|---------|-----|------------------|----------------|----------------------------|---------------------------------|----------------------------|-----------------------------|------------------|---------|-------------------------|-------------------------------------------------------------------------------------------------------------------------|
| 1    | 17.23 | 85.4    | 8   | 6/25             | K239k          | (R)LTSPVNTSLDTNIAFER(T)    | 2119.1394                       | 114.0390                   | -1.8                        | 67619.41494      | HUMAN   | <a href="#">Q8IZ07</a>  | Ankyrin repeat domain-containing protein 13A OS=Homo sapiens GN=ANKRD13A PE=1 SV=3                                      |
| 2    | 5.92  | 62.3    | 4   | 13/25            | None           | (R)TLSATSTGTLARPTGTLAR(S)  | 2233.1783                       | 0.0001                     | 0.0                         | 59411.91306      | HUMAN   | <a href="#">RQ9UF83</a> | REVERSE Uncharacterized protein DKFZP434B061 OS=Homo sapiens PE=2 SV=2                                                  |
| 3    | 4.77  | 54.3    | 2   | 13/25            | None           | (R)TLEPVRPPWPNDYVSPSTR(N)  | 2233.1975                       | -0.0192                    | -8.6                        | 55663.51582      | HUMAN   | <a href="#">Q9NYB9</a>  | Abi Interactor 2 OS=Homo sapiens GN=ABI2 PE=1 SV=1                                                                      |
| 4    | 4.41  | 52.4    | 2   | 13/25            | None           | (K)DVANANAKTLLFVEEER(K)    | 2233.1459                       | 0.0324                     | 14.5                        | 27542.01849      | HUMAN   | <a href="#">RA7E2S9</a> | REVERSE Putative ankyrin repeat domain-containing protein encoded by NCRNA00164 OS=Homo sapiens GN=NCRNA00164 PE=5 SV=2 |
| 5    | 3.95  | 58.9    | 2   | 15/25            | None           | (K)TLSEKCLKLTMLQLEANKEK(L) | 2233.2108                       | -0.0325                    | -14.5                       | 158836.11608     | HUMAN   | <a href="#">RQ9BXX3</a> | REVERSE Ankyrin repeat domain-containing protein 30A OS=Homo sapiens GN=ANKRD30A PE=1 SV=3                              |

Detailed Results

| Rank                                                                                                                                                                                                                                                                                                                                                                                                                                                                                                                                                                                                                                                                                                                                                                                                                                                                                                                                                                                                                                                                                                                                                                                                                                                                                                                                                                                                                                                                                                                                                                                                                                                                                                                                                                                                                                                                                                                                                                                                                                                                                                                                                                                                                                                                                                                                                                                                                                                                                                                                                                                                                                                                                                                                   | Score  | SPI (%) | BCS    | # Unmatched Ions | Variable sites | Sequence                | MH <sup>+</sup> Calculated (Da) | MH <sup>+</sup> Error (Da) | MH <sup>+</sup> Error (ppm) | Protein MW (kDa) | Species | Accession #            | MS-Digest Index #     | Protein Name                                                                       |                       |                       |                       |                       |                       |         |                       |                       |                       |                       |                        |         |         |         |         |                       |                       |                       |                       |                       |         |                       |                       |                       |                       |                        |                         |      |      |      |      |      |      |      |      |      |      |      |      |      |      |      |      |      |      |      |      |      |      |      |      |      |                       |      |      |       |        |       |       |       |       |       |       |       |       |       |       |       |       |       |       |       |       |       |       |       |       |       |       |      |      |       |      |       |      |      |      |      |      |      |       |      |      |       |       |      |      |       |      |      |      |      |      |      |          |    |   |  |    |  |      |    |    |        |    |        |    |    |    |  |  |                       |                   |  |  |                       |                   |                   |                   |                   |           |      |      |  |  |  |       |       |       |       |      |      |     |      |  |  |  |     |      |  |       |      |      |       |      |     |
|----------------------------------------------------------------------------------------------------------------------------------------------------------------------------------------------------------------------------------------------------------------------------------------------------------------------------------------------------------------------------------------------------------------------------------------------------------------------------------------------------------------------------------------------------------------------------------------------------------------------------------------------------------------------------------------------------------------------------------------------------------------------------------------------------------------------------------------------------------------------------------------------------------------------------------------------------------------------------------------------------------------------------------------------------------------------------------------------------------------------------------------------------------------------------------------------------------------------------------------------------------------------------------------------------------------------------------------------------------------------------------------------------------------------------------------------------------------------------------------------------------------------------------------------------------------------------------------------------------------------------------------------------------------------------------------------------------------------------------------------------------------------------------------------------------------------------------------------------------------------------------------------------------------------------------------------------------------------------------------------------------------------------------------------------------------------------------------------------------------------------------------------------------------------------------------------------------------------------------------------------------------------------------------------------------------------------------------------------------------------------------------------------------------------------------------------------------------------------------------------------------------------------------------------------------------------------------------------------------------------------------------------------------------------------------------------------------------------------------------|--------|---------|--------|------------------|----------------|-------------------------|---------------------------------|----------------------------|-----------------------------|------------------|---------|------------------------|-----------------------|------------------------------------------------------------------------------------|-----------------------|-----------------------|-----------------------|-----------------------|-----------------------|---------|-----------------------|-----------------------|-----------------------|-----------------------|------------------------|---------|---------|---------|---------|-----------------------|-----------------------|-----------------------|-----------------------|-----------------------|---------|-----------------------|-----------------------|-----------------------|-----------------------|------------------------|-------------------------|------|------|------|------|------|------|------|------|------|------|------|------|------|------|------|------|------|------|------|------|------|------|------|------|------|-----------------------|------|------|-------|--------|-------|-------|-------|-------|-------|-------|-------|-------|-------|-------|-------|-------|-------|-------|-------|-------|-------|-------|-------|-------|-------|-------|------|------|-------|------|-------|------|------|------|------|------|------|-------|------|------|-------|-------|------|------|-------|------|------|------|------|------|------|----------|----|---|--|----|--|------|----|----|--------|----|--------|----|----|----|--|--|-----------------------|-------------------|--|--|-----------------------|-------------------|-------------------|-------------------|-------------------|-----------|------|------|--|--|--|-------|-------|-------|-------|------|------|-----|------|--|--|--|-----|------|--|-------|------|------|-------|------|-----|
| 1                                                                                                                                                                                                                                                                                                                                                                                                                                                                                                                                                                                                                                                                                                                                                                                                                                                                                                                                                                                                                                                                                                                                                                                                                                                                                                                                                                                                                                                                                                                                                                                                                                                                                                                                                                                                                                                                                                                                                                                                                                                                                                                                                                                                                                                                                                                                                                                                                                                                                                                                                                                                                                                                                                                                      | 17.23  | 85.4    | 8      | 6/25             | K239k          | (R)LTSPVNTSLDTNIAFER(T) | 2119.1394                       | 114.0390                   | -1.8                        | 67619.41494      | HUMAN   | <a href="#">Q8IZ07</a> | <a href="#">23377</a> | Ankyrin repeat domain-containing protein 13A OS=Homo sapiens GN=ANKRD13A PE=1 SV=3 |                       |                       |                       |                       |                       |         |                       |                       |                       |                       |                        |         |         |         |         |                       |                       |                       |                       |                       |         |                       |                       |                       |                       |                        |                         |      |      |      |      |      |      |      |      |      |      |      |      |      |      |      |      |      |      |      |      |      |      |      |      |      |                       |      |      |       |        |       |       |       |       |       |       |       |       |       |       |       |       |       |       |       |       |       |       |       |       |       |       |      |      |       |      |       |      |      |      |      |      |      |       |      |      |       |       |      |      |       |      |      |      |      |      |      |          |    |   |  |    |  |      |    |    |        |    |        |    |    |    |  |  |                       |                   |  |  |                       |                   |                   |                   |                   |           |      |      |  |  |  |       |       |       |       |      |      |     |      |  |  |  |     |      |  |       |      |      |       |      |     |
| <table border="1"> <thead> <tr> <th>Fragment-ion (m/z)</th> <th>70.065</th> <th>72.080</th> <th>84.079</th> <th>86.095</th> <th>87.087</th> <th>169.132</th> <th>175.116</th> <th>187.143</th> <th>197.125</th> <th>215.140</th> <th>284.159</th> <th>291.193</th> <th>451.231</th> <th>522.261</th> <th>635.352<sup>+3</sup></th> <th>644.317<sup>+3</sup></th> <th>667.686<sup>+3</sup></th> <th>673.686<sup>+3</sup></th> <th>706.383<sup>+2</sup></th> <th>749.386</th> <th>802.904<sup>+2</sup></th> <th>811.904<sup>+2</sup></th> <th>868.440<sup>+2</sup></th> <th>866.509<sup>+2</sup></th> <th>1010.034<sup>+2</sup></th> </tr> </thead> <tbody> <tr> <td>Frac. Inten. (% of TIC)</td> <td>0.00</td> <td>0.06</td> <td>1.42</td> <td>9.95</td> <td>1.39</td> <td>2.36</td> <td>1.40</td> <td>2.87</td> <td>7.17</td> <td>3.99</td> <td>6.84</td> <td>2.39</td> <td>1.90</td> <td>4.28</td> <td>1.35</td> <td>6.69</td> <td>6.67</td> <td>7.50</td> <td>1.36</td> <td>2.53</td> <td>1.84</td> <td>3.05</td> <td>4.78</td> <td>8.31</td> <td>9.94</td> </tr> <tr> <td>Rel. Inten. (% of BP)</td> <td>0.04</td> <td>0.62</td> <td>14.26</td> <td>100.00</td> <td>13.92</td> <td>23.67</td> <td>14.02</td> <td>28.87</td> <td>72.00</td> <td>40.08</td> <td>68.71</td> <td>23.99</td> <td>19.09</td> <td>43.02</td> <td>13.55</td> <td>67.22</td> <td>66.97</td> <td>75.34</td> <td>13.64</td> <td>25.38</td> <td>18.44</td> <td>30.63</td> <td>48.03</td> <td>83.46</td> <td>99.85</td> </tr> <tr> <td>Score</td> <td>0.20</td> <td>0.50</td> <td>-0.14</td> <td>0.50</td> <td>-0.14</td> <td>0.50</td> <td>1.50</td> <td>0.50</td> <td>0.75</td> <td>0.50</td> <td>0.75</td> <td>-0.24</td> <td>1.50</td> <td>1.50</td> <td>-0.14</td> <td>-0.67</td> <td>0.50</td> <td>1.50</td> <td>-0.14</td> <td>1.50</td> <td>0.50</td> <td>1.50</td> <td>1.50</td> <td>1.50</td> <td>1.50</td> </tr> <tr> <td>Ion-type</td> <td>PR</td> <td>V</td> <td></td> <td>B1</td> <td></td> <td>PW28</td> <td>Y1</td> <td>B2</td> <td>b2-H2O</td> <td>b2</td> <td>b2-H2O</td> <td>Y3</td> <td>Y6</td> <td>Y6</td> <td></td> <td></td> <td>Y17-H2O<sup>+3</sup></td> <td>Y17<sup>+3</sup></td> <td></td> <td></td> <td>Y13-H2O<sup>+2</sup></td> <td>Y13<sup>+2</sup></td> <td>Y14<sup>+2</sup></td> <td>Y14<sup>+2</sup></td> <td>Y17<sup>+2</sup></td> </tr> <tr> <td>Delta ppm</td> <td>-6.1</td> <td>-6.6</td> <td></td> <td></td> <td></td> <td>-28.1</td> <td>-13.2</td> <td>-16.9</td> <td>-13.4</td> <td>-2.4</td> <td>-9.1</td> <td>SPV</td> <td>-9.1</td> <td></td> <td></td> <td></td> <td>4.4</td> <td>-3.5</td> <td></td> <td>-10.8</td> <td>-1.0</td> <td>-7.5</td> <td>-14.4</td> <td>-4.2</td> <td>4.8</td> </tr> </tbody> </table> |        |         |        |                  |                |                         |                                 |                            |                             |                  |         |                        |                       |                                                                                    | Fragment-ion (m/z)    | 70.065                | 72.080                | 84.079                | 86.095                | 87.087  | 169.132               | 175.116               | 187.143               | 197.125               | 215.140                | 284.159 | 291.193 | 451.231 | 522.261 | 635.352 <sup>+3</sup> | 644.317 <sup>+3</sup> | 667.686 <sup>+3</sup> | 673.686 <sup>+3</sup> | 706.383 <sup>+2</sup> | 749.386 | 802.904 <sup>+2</sup> | 811.904 <sup>+2</sup> | 868.440 <sup>+2</sup> | 866.509 <sup>+2</sup> | 1010.034 <sup>+2</sup> | Frac. Inten. (% of TIC) | 0.00 | 0.06 | 1.42 | 9.95 | 1.39 | 2.36 | 1.40 | 2.87 | 7.17 | 3.99 | 6.84 | 2.39 | 1.90 | 4.28 | 1.35 | 6.69 | 6.67 | 7.50 | 1.36 | 2.53 | 1.84 | 3.05 | 4.78 | 8.31 | 9.94 | Rel. Inten. (% of BP) | 0.04 | 0.62 | 14.26 | 100.00 | 13.92 | 23.67 | 14.02 | 28.87 | 72.00 | 40.08 | 68.71 | 23.99 | 19.09 | 43.02 | 13.55 | 67.22 | 66.97 | 75.34 | 13.64 | 25.38 | 18.44 | 30.63 | 48.03 | 83.46 | 99.85 | Score | 0.20 | 0.50 | -0.14 | 0.50 | -0.14 | 0.50 | 1.50 | 0.50 | 0.75 | 0.50 | 0.75 | -0.24 | 1.50 | 1.50 | -0.14 | -0.67 | 0.50 | 1.50 | -0.14 | 1.50 | 0.50 | 1.50 | 1.50 | 1.50 | 1.50 | Ion-type | PR | V |  | B1 |  | PW28 | Y1 | B2 | b2-H2O | b2 | b2-H2O | Y3 | Y6 | Y6 |  |  | Y17-H2O <sup>+3</sup> | Y17 <sup>+3</sup> |  |  | Y13-H2O <sup>+2</sup> | Y13 <sup>+2</sup> | Y14 <sup>+2</sup> | Y14 <sup>+2</sup> | Y17 <sup>+2</sup> | Delta ppm | -6.1 | -6.6 |  |  |  | -28.1 | -13.2 | -16.9 | -13.4 | -2.4 | -9.1 | SPV | -9.1 |  |  |  | 4.4 | -3.5 |  | -10.8 | -1.0 | -7.5 | -14.4 | -4.2 | 4.8 |
| Fragment-ion (m/z)                                                                                                                                                                                                                                                                                                                                                                                                                                                                                                                                                                                                                                                                                                                                                                                                                                                                                                                                                                                                                                                                                                                                                                                                                                                                                                                                                                                                                                                                                                                                                                                                                                                                                                                                                                                                                                                                                                                                                                                                                                                                                                                                                                                                                                                                                                                                                                                                                                                                                                                                                                                                                                                                                                                     | 70.065 | 72.080  | 84.079 | 86.095           | 87.087         | 169.132                 | 175.116                         | 187.143                    | 197.125                     | 215.140          | 284.159 | 291.193                | 451.231               | 522.261                                                                            | 635.352 <sup>+3</sup> | 644.317 <sup>+3</sup> | 667.686 <sup>+3</sup> | 673.686 <sup>+3</sup> | 706.383 <sup>+2</sup> | 749.386 | 802.904 <sup>+2</sup> | 811.904 <sup>+2</sup> | 868.440 <sup>+2</sup> | 866.509 <sup>+2</sup> | 1010.034 <sup>+2</sup> |         |         |         |         |                       |                       |                       |                       |                       |         |                       |                       |                       |                       |                        |                         |      |      |      |      |      |      |      |      |      |      |      |      |      |      |      |      |      |      |      |      |      |      |      |      |      |                       |      |      |       |        |       |       |       |       |       |       |       |       |       |       |       |       |       |       |       |       |       |       |       |       |       |       |      |      |       |      |       |      |      |      |      |      |      |       |      |      |       |       |      |      |       |      |      |      |      |      |      |          |    |   |  |    |  |      |    |    |        |    |        |    |    |    |  |  |                       |                   |  |  |                       |                   |                   |                   |                   |           |      |      |  |  |  |       |       |       |       |      |      |     |      |  |  |  |     |      |  |       |      |      |       |      |     |
| Frac. Inten. (% of TIC)                                                                                                                                                                                                                                                                                                                                                                                                                                                                                                                                                                                                                                                                                                                                                                                                                                                                                                                                                                                                                                                                                                                                                                                                                                                                                                                                                                                                                                                                                                                                                                                                                                                                                                                                                                                                                                                                                                                                                                                                                                                                                                                                                                                                                                                                                                                                                                                                                                                                                                                                                                                                                                                                                                                | 0.00   | 0.06    | 1.42   | 9.95             | 1.39           | 2.36                    | 1.40                            | 2.87                       | 7.17                        | 3.99             | 6.84    | 2.39                   | 1.90                  | 4.28                                                                               | 1.35                  | 6.69                  | 6.67                  | 7.50                  | 1.36                  | 2.53    | 1.84                  | 3.05                  | 4.78                  | 8.31                  | 9.94                   |         |         |         |         |                       |                       |                       |                       |                       |         |                       |                       |                       |                       |                        |                         |      |      |      |      |      |      |      |      |      |      |      |      |      |      |      |      |      |      |      |      |      |      |      |      |      |                       |      |      |       |        |       |       |       |       |       |       |       |       |       |       |       |       |       |       |       |       |       |       |       |       |       |       |      |      |       |      |       |      |      |      |      |      |      |       |      |      |       |       |      |      |       |      |      |      |      |      |      |          |    |   |  |    |  |      |    |    |        |    |        |    |    |    |  |  |                       |                   |  |  |                       |                   |                   |                   |                   |           |      |      |  |  |  |       |       |       |       |      |      |     |      |  |  |  |     |      |  |       |      |      |       |      |     |
| Rel. Inten. (% of BP)                                                                                                                                                                                                                                                                                                                                                                                                                                                                                                                                                                                                                                                                                                                                                                                                                                                                                                                                                                                                                                                                                                                                                                                                                                                                                                                                                                                                                                                                                                                                                                                                                                                                                                                                                                                                                                                                                                                                                                                                                                                                                                                                                                                                                                                                                                                                                                                                                                                                                                                                                                                                                                                                                                                  | 0.04   | 0.62    | 14.26  | 100.00           | 13.92          | 23.67                   | 14.02                           | 28.87                      | 72.00                       | 40.08            | 68.71   | 23.99                  | 19.09                 | 43.02                                                                              | 13.55                 | 67.22                 | 66.97                 | 75.34                 | 13.64                 | 25.38   | 18.44                 | 30.63                 | 48.03                 | 83.46                 | 99.85                  |         |         |         |         |                       |                       |                       |                       |                       |         |                       |                       |                       |                       |                        |                         |      |      |      |      |      |      |      |      |      |      |      |      |      |      |      |      |      |      |      |      |      |      |      |      |      |                       |      |      |       |        |       |       |       |       |       |       |       |       |       |       |       |       |       |       |       |       |       |       |       |       |       |       |      |      |       |      |       |      |      |      |      |      |      |       |      |      |       |       |      |      |       |      |      |      |      |      |      |          |    |   |  |    |  |      |    |    |        |    |        |    |    |    |  |  |                       |                   |  |  |                       |                   |                   |                   |                   |           |      |      |  |  |  |       |       |       |       |      |      |     |      |  |  |  |     |      |  |       |      |      |       |      |     |
| Score                                                                                                                                                                                                                                                                                                                                                                                                                                                                                                                                                                                                                                                                                                                                                                                                                                                                                                                                                                                                                                                                                                                                                                                                                                                                                                                                                                                                                                                                                                                                                                                                                                                                                                                                                                                                                                                                                                                                                                                                                                                                                                                                                                                                                                                                                                                                                                                                                                                                                                                                                                                                                                                                                                                                  | 0.20   | 0.50    | -0.14  | 0.50             | -0.14          | 0.50                    | 1.50                            | 0.50                       | 0.75                        | 0.50             | 0.75    | -0.24                  | 1.50                  | 1.50                                                                               | -0.14                 | -0.67                 | 0.50                  | 1.50                  | -0.14                 | 1.50    | 0.50                  | 1.50                  | 1.50                  | 1.50                  | 1.50                   |         |         |         |         |                       |                       |                       |                       |                       |         |                       |                       |                       |                       |                        |                         |      |      |      |      |      |      |      |      |      |      |      |      |      |      |      |      |      |      |      |      |      |      |      |      |      |                       |      |      |       |        |       |       |       |       |       |       |       |       |       |       |       |       |       |       |       |       |       |       |       |       |       |       |      |      |       |      |       |      |      |      |      |      |      |       |      |      |       |       |      |      |       |      |      |      |      |      |      |          |    |   |  |    |  |      |    |    |        |    |        |    |    |    |  |  |                       |                   |  |  |                       |                   |                   |                   |                   |           |      |      |  |  |  |       |       |       |       |      |      |     |      |  |  |  |     |      |  |       |      |      |       |      |     |
| Ion-type                                                                                                                                                                                                                                                                                                                                                                                                                                                                                                                                                                                                                                                                                                                                                                                                                                                                                                                                                                                                                                                                                                                                                                                                                                                                                                                                                                                                                                                                                                                                                                                                                                                                                                                                                                                                                                                                                                                                                                                                                                                                                                                                                                                                                                                                                                                                                                                                                                                                                                                                                                                                                                                                                                                               | PR     | V       |        | B1               |                | PW28                    | Y1                              | B2                         | b2-H2O                      | b2               | b2-H2O  | Y3                     | Y6                    | Y6                                                                                 |                       |                       | Y17-H2O <sup>+3</sup> | Y17 <sup>+3</sup>     |                       |         | Y13-H2O <sup>+2</sup> | Y13 <sup>+2</sup>     | Y14 <sup>+2</sup>     | Y14 <sup>+2</sup>     | Y17 <sup>+2</sup>      |         |         |         |         |                       |                       |                       |                       |                       |         |                       |                       |                       |                       |                        |                         |      |      |      |      |      |      |      |      |      |      |      |      |      |      |      |      |      |      |      |      |      |      |      |      |      |                       |      |      |       |        |       |       |       |       |       |       |       |       |       |       |       |       |       |       |       |       |       |       |       |       |       |       |      |      |       |      |       |      |      |      |      |      |      |       |      |      |       |       |      |      |       |      |      |      |      |      |      |          |    |   |  |    |  |      |    |    |        |    |        |    |    |    |  |  |                       |                   |  |  |                       |                   |                   |                   |                   |           |      |      |  |  |  |       |       |       |       |      |      |     |      |  |  |  |     |      |  |       |      |      |       |      |     |
| Delta ppm                                                                                                                                                                                                                                                                                                                                                                                                                                                                                                                                                                                                                                                                                                                                                                                                                                                                                                                                                                                                                                                                                                                                                                                                                                                                                                                                                                                                                                                                                                                                                                                                                                                                                                                                                                                                                                                                                                                                                                                                                                                                                                                                                                                                                                                                                                                                                                                                                                                                                                                                                                                                                                                                                                                              | -6.1   | -6.6    |        |                  |                | -28.1                   | -13.2                           | -16.9                      | -13.4                       | -2.4             | -9.1    | SPV                    | -9.1                  |                                                                                    |                       |                       | 4.4                   | -3.5                  |                       | -10.8   | -1.0                  | -7.5                  | -14.4                 | -4.2                  | 4.8                    |         |         |         |         |                       |                       |                       |                       |                       |         |                       |                       |                       |                       |                        |                         |      |      |      |      |      |      |      |      |      |      |      |      |      |      |      |      |      |      |      |      |      |      |      |      |      |                       |      |      |       |        |       |       |       |       |       |       |       |       |       |       |       |       |       |       |       |       |       |       |       |       |       |       |      |      |       |      |       |      |      |      |      |      |      |       |      |      |       |       |      |      |       |      |      |      |      |      |      |          |    |   |  |    |  |      |    |    |        |    |        |    |    |    |  |  |                       |                   |  |  |                       |                   |                   |                   |                   |           |      |      |  |  |  |       |       |       |       |      |      |     |      |  |  |  |     |      |  |       |      |      |       |      |     |

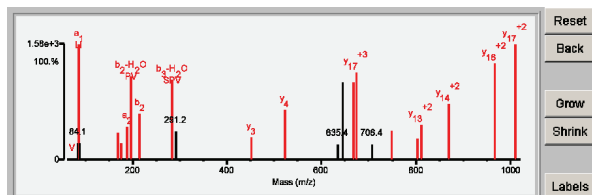

Result Summary

| Rank | Score | SPI (%) | BCS | # Unmatched Ions | Variable sites | Sequence                           | MH <sup>+</sup> Calculated (Da) | MH <sup>+</sup> Error (Da) | MH <sup>+</sup> Error (ppm) | Protein MW/pI (Da) | Species | Accession # | Protein Name                                                                               |
|------|-------|---------|-----|------------------|----------------|------------------------------------|---------------------------------|----------------------------|-----------------------------|--------------------|---------|-------------|--------------------------------------------------------------------------------------------|
| 1    | 13.19 | 64.4    | 9   | 11/25            | K1209K         | (K)A Q E E P P A K L L D L F R (K) | 1741.9119                       | 114.0707                   | 15.0                        | 151888.2/6.08      | HUMAN   | Q9UKV3      | Apoptotic chromatin condensation inducer in the nucleus OS=Homo sapiens GN=ACIN1 PE=1 SV=1 |

Detailed Results

| Rank                                                                                                                                                                                                                                                                                                                                                                                                                                                                                                                                                                                                                                                                                                                                                                                                                                                                                                                                                                                                                                                                                                                                                                                                                                                                                                                                                                                                                                                                                                                                                                                                                                                                                                                                                                                                                                                                                                                                                                                                                                                                                                                                                                                                                                                                                                                                                                                                                                                                                                                                                               | Score  | SPI (%) | BCS    | # Unmatched Ions | Variable sites | Sequence                            | MH <sup>+</sup> Calculated (Da) | MH <sup>+</sup> Error (Da) | MH <sup>+</sup> Error (ppm) | Protein MW/pI (Da) | Species | Accession # | MS-Digest Index # | Protein Name                                                                               |                    |                       |                       |         |                       |                       |         |         |         |         |                       |         |         |         |         |         |                       |                       |         |                       |                       |         |         |         |         |                       |                        |      |      |      |      |      |      |      |      |      |      |      |      |      |      |      |      |       |      |      |       |      |      |      |      |      |                      |      |      |      |      |       |       |       |       |       |       |       |       |       |       |       |       |       |       |       |        |       |       |      |       |       |       |      |      |      |      |       |       |       |       |      |      |      |       |      |       |      |      |      |      |       |      |      |       |       |       |       |          |    |   |    |    |  |  |  |  |    |        |    |  |    |  |    |                  |                   |    |  |                   |    |  |  |  |  |           |       |      |       |      |  |  |  |  |       |       |     |  |     |  |      |      |       |     |  |      |     |  |  |  |  |
|--------------------------------------------------------------------------------------------------------------------------------------------------------------------------------------------------------------------------------------------------------------------------------------------------------------------------------------------------------------------------------------------------------------------------------------------------------------------------------------------------------------------------------------------------------------------------------------------------------------------------------------------------------------------------------------------------------------------------------------------------------------------------------------------------------------------------------------------------------------------------------------------------------------------------------------------------------------------------------------------------------------------------------------------------------------------------------------------------------------------------------------------------------------------------------------------------------------------------------------------------------------------------------------------------------------------------------------------------------------------------------------------------------------------------------------------------------------------------------------------------------------------------------------------------------------------------------------------------------------------------------------------------------------------------------------------------------------------------------------------------------------------------------------------------------------------------------------------------------------------------------------------------------------------------------------------------------------------------------------------------------------------------------------------------------------------------------------------------------------------------------------------------------------------------------------------------------------------------------------------------------------------------------------------------------------------------------------------------------------------------------------------------------------------------------------------------------------------------------------------------------------------------------------------------------------------|--------|---------|--------|------------------|----------------|-------------------------------------|---------------------------------|----------------------------|-----------------------------|--------------------|---------|-------------|-------------------|--------------------------------------------------------------------------------------------|--------------------|-----------------------|-----------------------|---------|-----------------------|-----------------------|---------|---------|---------|---------|-----------------------|---------|---------|---------|---------|---------|-----------------------|-----------------------|---------|-----------------------|-----------------------|---------|---------|---------|---------|-----------------------|------------------------|------|------|------|------|------|------|------|------|------|------|------|------|------|------|------|------|-------|------|------|-------|------|------|------|------|------|----------------------|------|------|------|------|-------|-------|-------|-------|-------|-------|-------|-------|-------|-------|-------|-------|-------|-------|-------|--------|-------|-------|------|-------|-------|-------|------|------|------|------|-------|-------|-------|-------|------|------|------|-------|------|-------|------|------|------|------|-------|------|------|-------|-------|-------|-------|----------|----|---|----|----|--|--|--|--|----|--------|----|--|----|--|----|------------------|-------------------|----|--|-------------------|----|--|--|--|--|-----------|-------|------|-------|------|--|--|--|--|-------|-------|-----|--|-----|--|------|------|-------|-----|--|------|-----|--|--|--|--|
| 1                                                                                                                                                                                                                                                                                                                                                                                                                                                                                                                                                                                                                                                                                                                                                                                                                                                                                                                                                                                                                                                                                                                                                                                                                                                                                                                                                                                                                                                                                                                                                                                                                                                                                                                                                                                                                                                                                                                                                                                                                                                                                                                                                                                                                                                                                                                                                                                                                                                                                                                                                                  | 13.19  | 64.4    | 9      | 11/25            | K1209K         | (K) A Q E E P P A K L L D L F R (K) | 1741.9119                       | 114.0707                   | 15.0                        | 151888.2/6.08      | HUMAN   | Q9UKV3      | 8007              | Apoptotic chromatin condensation inducer in the nucleus OS=Homo sapiens GN=ACIN1 PE=1 SV=1 |                    |                       |                       |         |                       |                       |         |         |         |         |                       |         |         |         |         |         |                       |                       |         |                       |                       |         |         |         |         |                       |                        |      |      |      |      |      |      |      |      |      |      |      |      |      |      |      |      |       |      |      |       |      |      |      |      |      |                      |      |      |      |      |       |       |       |       |       |       |       |       |       |       |       |       |       |       |       |        |       |       |      |       |       |       |      |      |      |      |       |       |       |       |      |      |      |       |      |       |      |      |      |      |       |      |      |       |       |       |       |          |    |   |    |    |  |  |  |  |    |        |    |  |    |  |    |                  |                   |    |  |                   |    |  |  |  |  |           |       |      |       |      |  |  |  |  |       |       |     |  |     |  |      |      |       |     |  |      |     |  |  |  |  |
| <table border="1"> <thead> <tr> <th>Fragment-ion (m/z)</th> <th>70.064</th> <th>84.046</th> <th>84.080</th> <th>86.099</th> <th>89.070</th> <th>90.075</th> <th>112.079</th> <th>141.107</th> <th>175.113</th> <th>183.073</th> <th>200.105</th> <th>241.076</th> <th>435.272</th> <th>442.246</th> <th>550.294</th> <th>602.859<sup>+2</sup></th> <th>651.353<sup>+2</sup></th> <th>665.328</th> <th>666.329<sup>+2</sup></th> <th>699.886<sup>+2</sup></th> <th>778.414</th> <th>790.384</th> <th>849.507</th> <th>890.529</th> <th>892.492<sup>+2</sup></th> </tr> </thead> <tbody> <tr> <td>Frac. Inten.(% of TIC)</td> <td>0.00</td> <td>0.19</td> <td>0.20</td> <td>0.08</td> <td>4.38</td> <td>3.04</td> <td>3.07</td> <td>2.77</td> <td>4.47</td> <td>2.96</td> <td>4.06</td> <td>3.98</td> <td>4.65</td> <td>2.63</td> <td>3.84</td> <td>4.30</td> <td>10.38</td> <td>2.45</td> <td>3.12</td> <td>23.98</td> <td>2.81</td> <td>3.12</td> <td>2.26</td> <td>2.67</td> <td>4.58</td> </tr> <tr> <td>Rel. Inten.(% of BP)</td> <td>0.02</td> <td>0.81</td> <td>0.84</td> <td>0.34</td> <td>18.28</td> <td>12.70</td> <td>12.81</td> <td>11.54</td> <td>18.65</td> <td>12.34</td> <td>16.93</td> <td>16.62</td> <td>19.38</td> <td>10.99</td> <td>16.04</td> <td>17.93</td> <td>43.30</td> <td>10.21</td> <td>13.01</td> <td>100.00</td> <td>11.73</td> <td>13.01</td> <td>9.41</td> <td>11.13</td> <td>19.09</td> </tr> <tr> <td>Score</td> <td>0.20</td> <td>1.00</td> <td>0.50</td> <td>0.22</td> <td>-0.18</td> <td>-0.13</td> <td>-0.13</td> <td>-0.12</td> <td>1.50</td> <td>0.25</td> <td>0.50</td> <td>-0.17</td> <td>1.50</td> <td>-0.11</td> <td>1.50</td> <td>1.50</td> <td>1.50</td> <td>1.50</td> <td>-0.13</td> <td>1.50</td> <td>1.50</td> <td>-0.13</td> <td>-0.09</td> <td>-0.11</td> <td>-0.19</td> </tr> <tr> <td>Ion-type</td> <td>PR</td> <td>E</td> <td>KQ</td> <td>LI</td> <td></td> <td></td> <td></td> <td></td> <td>y1</td> <td>b2-NH3</td> <td>b2</td> <td></td> <td>y3</td> <td></td> <td>y4</td> <td>y5<sup>+2</sup></td> <td>y10<sup>+2</sup></td> <td>y5</td> <td></td> <td>y11<sup>+2</sup></td> <td>y6</td> <td></td> <td></td> <td></td> <td></td> </tr> <tr> <td>Delta ppm</td> <td>-11.8</td> <td>15.6</td> <td>-11.6</td> <td>27.6</td> <td></td> <td></td> <td></td> <td></td> <td>-32.3</td> <td>-26.3</td> <td>2.2</td> <td></td> <td>0.8</td> <td></td> <td>-7.9</td> <td>34.9</td> <td>-17.6</td> <td>4.5</td> <td></td> <td>-6.9</td> <td>6.3</td> <td></td> <td></td> <td></td> <td></td> </tr> </tbody> </table> |        |         |        |                  |                |                                     |                                 |                            |                             |                    |         |             |                   |                                                                                            | Fragment-ion (m/z) | 70.064                | 84.046                | 84.080  | 86.099                | 89.070                | 90.075  | 112.079 | 141.107 | 175.113 | 183.073               | 200.105 | 241.076 | 435.272 | 442.246 | 550.294 | 602.859 <sup>+2</sup> | 651.353 <sup>+2</sup> | 665.328 | 666.329 <sup>+2</sup> | 699.886 <sup>+2</sup> | 778.414 | 790.384 | 849.507 | 890.529 | 892.492 <sup>+2</sup> | Frac. Inten.(% of TIC) | 0.00 | 0.19 | 0.20 | 0.08 | 4.38 | 3.04 | 3.07 | 2.77 | 4.47 | 2.96 | 4.06 | 3.98 | 4.65 | 2.63 | 3.84 | 4.30 | 10.38 | 2.45 | 3.12 | 23.98 | 2.81 | 3.12 | 2.26 | 2.67 | 4.58 | Rel. Inten.(% of BP) | 0.02 | 0.81 | 0.84 | 0.34 | 18.28 | 12.70 | 12.81 | 11.54 | 18.65 | 12.34 | 16.93 | 16.62 | 19.38 | 10.99 | 16.04 | 17.93 | 43.30 | 10.21 | 13.01 | 100.00 | 11.73 | 13.01 | 9.41 | 11.13 | 19.09 | Score | 0.20 | 1.00 | 0.50 | 0.22 | -0.18 | -0.13 | -0.13 | -0.12 | 1.50 | 0.25 | 0.50 | -0.17 | 1.50 | -0.11 | 1.50 | 1.50 | 1.50 | 1.50 | -0.13 | 1.50 | 1.50 | -0.13 | -0.09 | -0.11 | -0.19 | Ion-type | PR | E | KQ | LI |  |  |  |  | y1 | b2-NH3 | b2 |  | y3 |  | y4 | y5 <sup>+2</sup> | y10 <sup>+2</sup> | y5 |  | y11 <sup>+2</sup> | y6 |  |  |  |  | Delta ppm | -11.8 | 15.6 | -11.6 | 27.6 |  |  |  |  | -32.3 | -26.3 | 2.2 |  | 0.8 |  | -7.9 | 34.9 | -17.6 | 4.5 |  | -6.9 | 6.3 |  |  |  |  |
| Fragment-ion (m/z)                                                                                                                                                                                                                                                                                                                                                                                                                                                                                                                                                                                                                                                                                                                                                                                                                                                                                                                                                                                                                                                                                                                                                                                                                                                                                                                                                                                                                                                                                                                                                                                                                                                                                                                                                                                                                                                                                                                                                                                                                                                                                                                                                                                                                                                                                                                                                                                                                                                                                                                                                 | 70.064 | 84.046  | 84.080 | 86.099           | 89.070         | 90.075                              | 112.079                         | 141.107                    | 175.113                     | 183.073            | 200.105 | 241.076     | 435.272           | 442.246                                                                                    | 550.294            | 602.859 <sup>+2</sup> | 651.353 <sup>+2</sup> | 665.328 | 666.329 <sup>+2</sup> | 699.886 <sup>+2</sup> | 778.414 | 790.384 | 849.507 | 890.529 | 892.492 <sup>+2</sup> |         |         |         |         |         |                       |                       |         |                       |                       |         |         |         |         |                       |                        |      |      |      |      |      |      |      |      |      |      |      |      |      |      |      |      |       |      |      |       |      |      |      |      |      |                      |      |      |      |      |       |       |       |       |       |       |       |       |       |       |       |       |       |       |       |        |       |       |      |       |       |       |      |      |      |      |       |       |       |       |      |      |      |       |      |       |      |      |      |      |       |      |      |       |       |       |       |          |    |   |    |    |  |  |  |  |    |        |    |  |    |  |    |                  |                   |    |  |                   |    |  |  |  |  |           |       |      |       |      |  |  |  |  |       |       |     |  |     |  |      |      |       |     |  |      |     |  |  |  |  |
| Frac. Inten.(% of TIC)                                                                                                                                                                                                                                                                                                                                                                                                                                                                                                                                                                                                                                                                                                                                                                                                                                                                                                                                                                                                                                                                                                                                                                                                                                                                                                                                                                                                                                                                                                                                                                                                                                                                                                                                                                                                                                                                                                                                                                                                                                                                                                                                                                                                                                                                                                                                                                                                                                                                                                                                             | 0.00   | 0.19    | 0.20   | 0.08             | 4.38           | 3.04                                | 3.07                            | 2.77                       | 4.47                        | 2.96               | 4.06    | 3.98        | 4.65              | 2.63                                                                                       | 3.84               | 4.30                  | 10.38                 | 2.45    | 3.12                  | 23.98                 | 2.81    | 3.12    | 2.26    | 2.67    | 4.58                  |         |         |         |         |         |                       |                       |         |                       |                       |         |         |         |         |                       |                        |      |      |      |      |      |      |      |      |      |      |      |      |      |      |      |      |       |      |      |       |      |      |      |      |      |                      |      |      |      |      |       |       |       |       |       |       |       |       |       |       |       |       |       |       |       |        |       |       |      |       |       |       |      |      |      |      |       |       |       |       |      |      |      |       |      |       |      |      |      |      |       |      |      |       |       |       |       |          |    |   |    |    |  |  |  |  |    |        |    |  |    |  |    |                  |                   |    |  |                   |    |  |  |  |  |           |       |      |       |      |  |  |  |  |       |       |     |  |     |  |      |      |       |     |  |      |     |  |  |  |  |
| Rel. Inten.(% of BP)                                                                                                                                                                                                                                                                                                                                                                                                                                                                                                                                                                                                                                                                                                                                                                                                                                                                                                                                                                                                                                                                                                                                                                                                                                                                                                                                                                                                                                                                                                                                                                                                                                                                                                                                                                                                                                                                                                                                                                                                                                                                                                                                                                                                                                                                                                                                                                                                                                                                                                                                               | 0.02   | 0.81    | 0.84   | 0.34             | 18.28          | 12.70                               | 12.81                           | 11.54                      | 18.65                       | 12.34              | 16.93   | 16.62       | 19.38             | 10.99                                                                                      | 16.04              | 17.93                 | 43.30                 | 10.21   | 13.01                 | 100.00                | 11.73   | 13.01   | 9.41    | 11.13   | 19.09                 |         |         |         |         |         |                       |                       |         |                       |                       |         |         |         |         |                       |                        |      |      |      |      |      |      |      |      |      |      |      |      |      |      |      |      |       |      |      |       |      |      |      |      |      |                      |      |      |      |      |       |       |       |       |       |       |       |       |       |       |       |       |       |       |       |        |       |       |      |       |       |       |      |      |      |      |       |       |       |       |      |      |      |       |      |       |      |      |      |      |       |      |      |       |       |       |       |          |    |   |    |    |  |  |  |  |    |        |    |  |    |  |    |                  |                   |    |  |                   |    |  |  |  |  |           |       |      |       |      |  |  |  |  |       |       |     |  |     |  |      |      |       |     |  |      |     |  |  |  |  |
| Score                                                                                                                                                                                                                                                                                                                                                                                                                                                                                                                                                                                                                                                                                                                                                                                                                                                                                                                                                                                                                                                                                                                                                                                                                                                                                                                                                                                                                                                                                                                                                                                                                                                                                                                                                                                                                                                                                                                                                                                                                                                                                                                                                                                                                                                                                                                                                                                                                                                                                                                                                              | 0.20   | 1.00    | 0.50   | 0.22             | -0.18          | -0.13                               | -0.13                           | -0.12                      | 1.50                        | 0.25               | 0.50    | -0.17       | 1.50              | -0.11                                                                                      | 1.50               | 1.50                  | 1.50                  | 1.50    | -0.13                 | 1.50                  | 1.50    | -0.13   | -0.09   | -0.11   | -0.19                 |         |         |         |         |         |                       |                       |         |                       |                       |         |         |         |         |                       |                        |      |      |      |      |      |      |      |      |      |      |      |      |      |      |      |      |       |      |      |       |      |      |      |      |      |                      |      |      |      |      |       |       |       |       |       |       |       |       |       |       |       |       |       |       |       |        |       |       |      |       |       |       |      |      |      |      |       |       |       |       |      |      |      |       |      |       |      |      |      |      |       |      |      |       |       |       |       |          |    |   |    |    |  |  |  |  |    |        |    |  |    |  |    |                  |                   |    |  |                   |    |  |  |  |  |           |       |      |       |      |  |  |  |  |       |       |     |  |     |  |      |      |       |     |  |      |     |  |  |  |  |
| Ion-type                                                                                                                                                                                                                                                                                                                                                                                                                                                                                                                                                                                                                                                                                                                                                                                                                                                                                                                                                                                                                                                                                                                                                                                                                                                                                                                                                                                                                                                                                                                                                                                                                                                                                                                                                                                                                                                                                                                                                                                                                                                                                                                                                                                                                                                                                                                                                                                                                                                                                                                                                           | PR     | E       | KQ     | LI               |                |                                     |                                 |                            | y1                          | b2-NH3             | b2      |             | y3                |                                                                                            | y4                 | y5 <sup>+2</sup>      | y10 <sup>+2</sup>     | y5      |                       | y11 <sup>+2</sup>     | y6      |         |         |         |                       |         |         |         |         |         |                       |                       |         |                       |                       |         |         |         |         |                       |                        |      |      |      |      |      |      |      |      |      |      |      |      |      |      |      |      |       |      |      |       |      |      |      |      |      |                      |      |      |      |      |       |       |       |       |       |       |       |       |       |       |       |       |       |       |       |        |       |       |      |       |       |       |      |      |      |      |       |       |       |       |      |      |      |       |      |       |      |      |      |      |       |      |      |       |       |       |       |          |    |   |    |    |  |  |  |  |    |        |    |  |    |  |    |                  |                   |    |  |                   |    |  |  |  |  |           |       |      |       |      |  |  |  |  |       |       |     |  |     |  |      |      |       |     |  |      |     |  |  |  |  |
| Delta ppm                                                                                                                                                                                                                                                                                                                                                                                                                                                                                                                                                                                                                                                                                                                                                                                                                                                                                                                                                                                                                                                                                                                                                                                                                                                                                                                                                                                                                                                                                                                                                                                                                                                                                                                                                                                                                                                                                                                                                                                                                                                                                                                                                                                                                                                                                                                                                                                                                                                                                                                                                          | -11.8  | 15.6    | -11.6  | 27.6             |                |                                     |                                 |                            | -32.3                       | -26.3              | 2.2     |             | 0.8               |                                                                                            | -7.9               | 34.9                  | -17.6                 | 4.5     |                       | -6.9                  | 6.3     |         |         |         |                       |         |         |         |         |         |                       |                       |         |                       |                       |         |         |         |         |                       |                        |      |      |      |      |      |      |      |      |      |      |      |      |      |      |      |      |       |      |      |       |      |      |      |      |      |                      |      |      |      |      |       |       |       |       |       |       |       |       |       |       |       |       |       |       |       |        |       |       |      |       |       |       |      |      |      |      |       |       |       |       |      |      |      |       |      |       |      |      |      |      |       |      |      |       |       |       |       |          |    |   |    |    |  |  |  |  |    |        |    |  |    |  |    |                  |                   |    |  |                   |    |  |  |  |  |           |       |      |       |      |  |  |  |  |       |       |     |  |     |  |      |      |       |     |  |      |     |  |  |  |  |

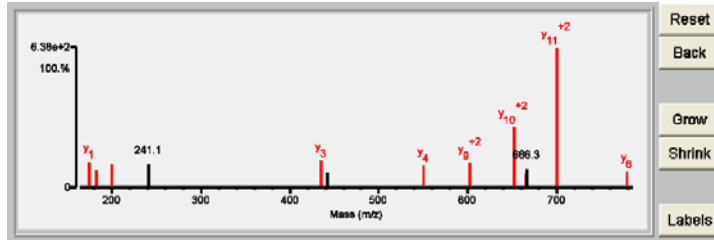



Result Summary

| Rank | Score | SPI (%) | BCS | # Unmatched Ions | Variable sites | Sequence               | MH <sup>+</sup> Calculated (Da) | MH <sup>+</sup> Error (Da) | MH <sup>+</sup> Error (ppm) | Protein MW/pI (Da) | Species | Accession #             | Protein Name                                                                |
|------|-------|---------|-----|------------------|----------------|------------------------|---------------------------------|----------------------------|-----------------------------|--------------------|---------|-------------------------|-----------------------------------------------------------------------------|
| 1    | 12.81 | 67.4    | 7   | 9/25             | K134k          | (R)FLAAQKGYPIIFTAWK(L) | 1925.0684                       | 114.0454                   | 1.2                         | 54142.2/5.83       | HUMAN   | <a href="#">Q6NXE6</a>  | Armadillo repeat-containing protein 6 OS=Homo sapiens GN=ARMC6 PE=1 SV=2    |
| 2    | 6.48  | 53.1    | 3   | 12/25            | K1066k         | (R)KELTDFLRKPKDAYGK(S) | 1925.0855                       | 114.0283                   | -7.2                        | 138605.0/6.45      | HUMAN   | <a href="#">Q86Y13</a>  | E3 ubiquitin-protein ligase DZIP3 OS=Homo sapiens GN=DZIP3 PE=1 SV=2        |
| 3    | 5.91  | 54.3    | 1   | 11/25            | K172k          | (R)QLIDYERQLFGKSTVK(M) | 1925.0491                       | 114.0647                   | 10.7                        | 22255.1/9.62       | HUMAN   | <a href="#">Q95147</a>  | Dual specificity protein phosphatase 14 OS=Homo sapiens GN=DUSP14 PE=1 SV=1 |
| 4    | 5.27  | 57.9    | 1   | 14/25            | K117k          | (K)ILSESALFADYKALKK(V) | 1925.1106                       | 114.0031                   | -19.5                       | 24831.5/9.94       | HUMAN   | <a href="#">RP62906</a> | REVERSE 60S ribosomal protein L10a OS=Homo sapiens GN=RPL10A PE=1 SV=2      |
| 5    | 4.18  | 50.8    | 2   | 14/25            | K294k          | (R)HIRQHMLSTSKQIFAK(G) | 1925.0538                       | 114.0600                   | 8.3                         | 98221.8/8.68       | HUMAN   | <a href="#">RQ5JVG2</a> | REVERSE Zinc finger protein 484 OS=Homo sapiens GN=ZNF484 PE=1 SV=1         |

Detailed Results

| Rank                   | Score  | SPI (%) | BCS    | # Unmatched Ions | Variable sites | Sequence               | MH <sup>+</sup> Calculated (Da) | MH <sup>+</sup> Error (Da) | MH <sup>+</sup> Error (ppm) | Protein MW/pI (Da) | Species | Accession #            | MS-Digest Index #     | Protein Name                                                             |         |                       |                  |                       |         |         |         |                   |                       |         |         |
|------------------------|--------|---------|--------|------------------|----------------|------------------------|---------------------------------|----------------------------|-----------------------------|--------------------|---------|------------------------|-----------------------|--------------------------------------------------------------------------|---------|-----------------------|------------------|-----------------------|---------|---------|---------|-------------------|-----------------------|---------|---------|
| 1                      | 12.81  | 67.4    | 7      | 9/25             | K134k          | (R)FLAAQKGYPIIFTAWK(L) | 1925.0684                       | 114.0454                   | 1.2                         | 54142.2/5.83       | HUMAN   | <a href="#">Q6NXE6</a> | <a href="#">35499</a> | Armadillo repeat-containing protein 6 OS=Homo sapiens GN=ARMC6 PE=1 SV=2 |         |                       |                  |                       |         |         |         |                   |                       |         |         |
| Fragment-ion (m/z)     | 70.066 | 72.081  | 84.044 | 86.094           | 120.078        | 129.103                | 136.074                         | 159.082                    | 183.151                     | 233.163            | 261.161 | 332.207                | 368.191               | 446.758 <sup>+2</sup>                                                    | 459.248 | 488.284 <sup>+2</sup> | 505.275          | 518.797 <sup>+2</sup> | 543.277 | 616.289 | 652.337 | 765.425           | 889.971 <sup>+2</sup> | 901.506 | 975.558 |
| Frac. Inten.(% of TIC) | 0.00   | 3.05    | 3.44   | 0.41             | 0.29           | 0.08                   | 0.08                            | 4.90                       | 5.62                        | 15.83              | 7.87    | 5.98                   | 2.56                  | 3.35                                                                     | 3.14    | 11.51                 | 3.88             | 3.24                  | 2.76    | 3.80    | 4.21    | 4.48              | 3.36                  | 2.62    | 3.54    |
| Rel. Inten.(% of BP)   | 0.02   | 19.25   | 21.71  | 2.61             | 1.86           | 0.52                   | 0.50                            | 30.98                      | 35.49                       | 100.00             | 49.72   | 37.81                  | 16.17                 | 21.17                                                                    | 19.86   | 72.71                 | 24.52            | 20.48                 | 17.42   | 23.99   | 26.63   | 28.32             | 21.22                 | 16.55   | 22.40   |
| Score                  | 0.20   | -0.19   | -0.22  | 0.22             | 1.00           | 0.20                   | 1.00                            | -0.31                      | -0.35                       | 0.50               | 0.75    | 0.50                   | -0.16                 | -0.21                                                                    | -0.20   | 1.50                  | 1.50             | 0.50                  | -0.17   | -0.24   | 1.50    | 1.50              | 1.50                  | 0.50    | 1.50    |
| Ion-type               | PR     |         | LI     | a1               | RKQ            | Y                      |                                 | a2                         | b2                          | b3                 |         |                        |                       | y6 <sup>+2</sup>                                                         | y4      | y6 <sup>+2</sup>      | a9 <sup>+2</sup> | y5                    | y6      |         |         | y15 <sup>+2</sup> | b8                    | y6      |         |
| Delta ppm              | 9.6    |         | -24.7  | -29.8            | 1.00           | 7.4                    | -11.7                           | -14.3                      | IF-28                       | IF                 | 28.4    |                        |                       | -6.4                                                                     | -3.6    | 28.0                  |                  | -12.1                 | -5.9    |         |         | -13.5             | 17.7                  | -8.5    |         |

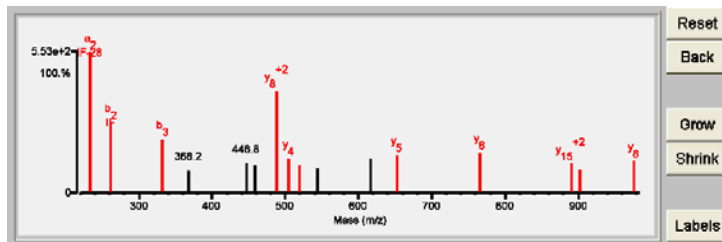

| Rank | Score | SPI (%) | BCS | Unmatched Ions | Variable sites | Sequence                                             | Calculated (Da) | Error (Da) | Error (ppm) | MW/pl (Da)    | Species | Accession # | Protein Name                                                                               |
|------|-------|---------|-----|----------------|----------------|------------------------------------------------------|-----------------|------------|-------------|---------------|---------|-------------|--------------------------------------------------------------------------------------------|
| 1    | 13.37 | 72.3    | 5   | 9/25           | K221k          | (R)DVP L H A L Y D N V E K L F P G F E I E T V K (N) | 2773.4447       | 114.0683   | 8.8         | 64370.3/6.39  | HUMAN   | P08243      | Asparagine synthetase [glutamine-hydrolyzing] OS=Homo sapiens GN=ASNS PE=1 SV=4            |
| 2    | 4.22  | 52.8    | 1   | 14/25          | K339k          | (K)NNGSVGKQYFKAPKYGIFAPLSK(I)                        | 2773.4494       | 114.0636   | 7.1         | 76317.0/8.93  | HUMAN   | Q8N3C7      | CAP-Gly domain-containing linker protein 4 OS=Homo sapiens GN=CLIP4 PE=2 SV=1              |
| 3    | 4.22  | 52.8    | 1   | 14/25          | K335k          | (K)NNGSVGKQYFKAPKYGIFAPLSK(I)                        | 2773.4494       | 114.0636   | 7.1         | 76317.0/8.93  | HUMAN   | Q8N3C7      | CAP-Gly domain-containing linker protein 4 OS=Homo sapiens GN=CLIP4 PE=2 SV=1              |
| 3    | 3.85  | 55.0    | 1   | 13/25          | None           | (K)GKSPQTPELVSA L T F R E W T C P N L K K (L)        | 2887.5135       | -0.0005    | -0.2        | 120576.7/8.19 | HUMAN   | Q9NX05      | Constitutive coactivator of PPAR-gamma-like protein 2 OS=Homo sapiens GN=FAM120C PE=2 SV=2 |
| 4    | 3.56  | 50.8    | 2   | 15/25          | M1543m         | (K)LPSSVLISGTPNLLSPKSDMPFM RQR(E)                    | 2871.5219       | 15.9910    | -1.3        | 270211.1/6.67 | HUMAN   | R075376     | REVERSE Nuclear receptor corepressor 1 OS=Homo sapiens GN=NCOR1 PE=1 SV=2                  |

Detailed Results

| Rank                                                                                                                                                                                                                                                                                                                                                                                                                                                                                                                                                                                                                                                                                                                                                                                                                                                                                                                                                                                                                                                                                                                                                                                                                                                                                                                                                                                                                                                                                                                                                                                                                                                                                                                                                                                                                                                                                                                                                                                                                                                                                                                                                                                                                                                                                                                                                                                                                                                                                                                                                                                                                                                                                               | Score  | SPI (%) | BCS    | # Unmatched Ions | Variable sites | Sequence                                               | MH <sup>+</sup> Calculated (Da) | MH <sup>+</sup> Error (Da) | MH <sup>+</sup> Error (ppm) | Protein MW/pl (Da) | Species | Accession #      | MS-Digest Index # | Protein Name                                                                    |                    |                       |                  |                  |                       |                       |                       |                       |                  |                  |                  |         |         |         |         |         |                       |         |         |                       |                       |                       |                       |         |          |          |                         |      |      |      |      |      |      |      |      |      |       |      |      |      |      |      |       |      |      |      |      |      |      |      |       |      |                       |      |      |      |      |       |      |      |       |       |       |       |       |       |       |       |        |       |       |       |       |       |       |       |       |       |       |      |      |      |      |       |      |      |       |       |      |       |       |      |      |       |        |      |      |       |       |      |       |      |      |      |          |    |   |    |    |   |   |   |   |    |    |    |                  |                  |                  |                  |                  |                  |                  |                  |                  |                  |                  |                  |                  |                  |           |     |      |      |      |  |      |       |  |  |  |  |  |  |  |  |  |  |  |  |  |  |  |  |  |  |
|----------------------------------------------------------------------------------------------------------------------------------------------------------------------------------------------------------------------------------------------------------------------------------------------------------------------------------------------------------------------------------------------------------------------------------------------------------------------------------------------------------------------------------------------------------------------------------------------------------------------------------------------------------------------------------------------------------------------------------------------------------------------------------------------------------------------------------------------------------------------------------------------------------------------------------------------------------------------------------------------------------------------------------------------------------------------------------------------------------------------------------------------------------------------------------------------------------------------------------------------------------------------------------------------------------------------------------------------------------------------------------------------------------------------------------------------------------------------------------------------------------------------------------------------------------------------------------------------------------------------------------------------------------------------------------------------------------------------------------------------------------------------------------------------------------------------------------------------------------------------------------------------------------------------------------------------------------------------------------------------------------------------------------------------------------------------------------------------------------------------------------------------------------------------------------------------------------------------------------------------------------------------------------------------------------------------------------------------------------------------------------------------------------------------------------------------------------------------------------------------------------------------------------------------------------------------------------------------------------------------------------------------------------------------------------------------------|--------|---------|--------|------------------|----------------|--------------------------------------------------------|---------------------------------|----------------------------|-----------------------------|--------------------|---------|------------------|-------------------|---------------------------------------------------------------------------------|--------------------|-----------------------|------------------|------------------|-----------------------|-----------------------|-----------------------|-----------------------|------------------|------------------|------------------|---------|---------|---------|---------|---------|-----------------------|---------|---------|-----------------------|-----------------------|-----------------------|-----------------------|---------|----------|----------|-------------------------|------|------|------|------|------|------|------|------|------|-------|------|------|------|------|------|-------|------|------|------|------|------|------|------|-------|------|-----------------------|------|------|------|------|-------|------|------|-------|-------|-------|-------|-------|-------|-------|-------|--------|-------|-------|-------|-------|-------|-------|-------|-------|-------|-------|------|------|------|------|-------|------|------|-------|-------|------|-------|-------|------|------|-------|--------|------|------|-------|-------|------|-------|------|------|------|----------|----|---|----|----|---|---|---|---|----|----|----|------------------|------------------|------------------|------------------|------------------|------------------|------------------|------------------|------------------|------------------|------------------|------------------|------------------|------------------|-----------|-----|------|------|------|--|------|-------|--|--|--|--|--|--|--|--|--|--|--|--|--|--|--|--|--|--|
| 1                                                                                                                                                                                                                                                                                                                                                                                                                                                                                                                                                                                                                                                                                                                                                                                                                                                                                                                                                                                                                                                                                                                                                                                                                                                                                                                                                                                                                                                                                                                                                                                                                                                                                                                                                                                                                                                                                                                                                                                                                                                                                                                                                                                                                                                                                                                                                                                                                                                                                                                                                                                                                                                                                                  | 13.37  | 72.3    | 5      | 9/25             | K221k          | (R)D V P L H A L Y D N V E K L F P G F E I E T V K (N) | 2773.4447                       | 114.0683                   | 8.8                         | 64370.3/6.39       | HUMAN   | P08243           | 43793             | Asparagine synthetase [glutamine-hydrolyzing] OS=Homo sapiens GN=ASNS PE=1 SV=4 |                    |                       |                  |                  |                       |                       |                       |                       |                  |                  |                  |         |         |         |         |         |                       |         |         |                       |                       |                       |                       |         |          |          |                         |      |      |      |      |      |      |      |      |      |       |      |      |      |      |      |       |      |      |      |      |      |      |      |       |      |                       |      |      |      |      |       |      |      |       |       |       |       |       |       |       |       |        |       |       |       |       |       |       |       |       |       |       |      |      |      |      |       |      |      |       |       |      |       |       |      |      |       |        |      |      |       |       |      |       |      |      |      |          |    |   |    |    |   |   |   |   |    |    |    |                  |                  |                  |                  |                  |                  |                  |                  |                  |                  |                  |                  |                  |                  |           |     |      |      |      |  |      |       |  |  |  |  |  |  |  |  |  |  |  |  |  |  |  |  |  |  |
| <table border="1"> <thead> <tr> <th>Fragment-ion (m/z)</th> <th>70.065</th> <th>72.080</th> <th>84.080</th> <th>86.097</th> <th>101.064</th> <th>110.071</th> <th>120.079</th> <th>121.083</th> <th>147.075</th> <th>187.108</th> <th>188.112</th> <th>346.173</th> <th>356.223</th> <th>433.239</th> <th>498.282</th> <th>510.275<sup>+2</sup></th> <th>589.339</th> <th>632.335</th> <th>805.393<sup>+2</sup></th> <th>828.440<sup>+2</sup></th> <th>861.419<sup>+2</sup></th> <th>892.160<sup>+3</sup></th> <th>922.499</th> <th>1019.548</th> <th>1166.617</th> </tr> </thead> <tbody> <tr> <td>Frac. Inten. (% of TIC)</td> <td>0.00</td> <td>0.24</td> <td>0.08</td> <td>0.08</td> <td>2.71</td> <td>0.07</td> <td>0.30</td> <td>3.06</td> <td>2.97</td> <td>13.06</td> <td>3.54</td> <td>2.35</td> <td>3.04</td> <td>3.30</td> <td>2.65</td> <td>17.88</td> <td>4.54</td> <td>4.05</td> <td>2.64</td> <td>3.93</td> <td>2.34</td> <td>3.86</td> <td>6.61</td> <td>11.07</td> <td>5.61</td> </tr> <tr> <td>Rel. Inten. (% of BP)</td> <td>0.02</td> <td>1.36</td> <td>0.45</td> <td>0.47</td> <td>15.18</td> <td>0.40</td> <td>1.70</td> <td>17.11</td> <td>16.59</td> <td>73.07</td> <td>19.78</td> <td>13.16</td> <td>17.03</td> <td>18.49</td> <td>14.85</td> <td>100.00</td> <td>25.37</td> <td>22.65</td> <td>14.78</td> <td>21.99</td> <td>13.07</td> <td>21.58</td> <td>37.00</td> <td>61.91</td> <td>31.39</td> </tr> <tr> <td>Score</td> <td>0.20</td> <td>0.50</td> <td>0.50</td> <td>0.22</td> <td>-0.15</td> <td>1.00</td> <td>1.00</td> <td>-0.17</td> <td>16.59</td> <td>0.50</td> <td>-0.20</td> <td>-0.13</td> <td>0.75</td> <td>1.50</td> <td>-0.15</td> <td>100.00</td> <td>1.50</td> <td>0.75</td> <td>14.78</td> <td>-0.22</td> <td>0.50</td> <td>-0.22</td> <td>1.50</td> <td>1.50</td> <td>1.50</td> </tr> <tr> <td>Ion-type</td> <td>PR</td> <td>V</td> <td>KQ</td> <td>LI</td> <td>H</td> <td>F</td> <td>F</td> <td>F</td> <td>KL</td> <td>KL</td> <td>KL</td> <td>Y<sup>++7</sup></td> <td>Y<sup>++7</sup></td> <td>Y<sup>++7</sup></td> <td>Y<sup>++2</sup></td> </tr> <tr> <td>Delta ppm</td> <td>1.1</td> <td>-9.4</td> <td>-6.8</td> <td>10.2</td> <td></td> <td>-5.2</td> <td>-16.5</td> <td></td> </tr> </tbody> </table> |        |         |        |                  |                |                                                        |                                 |                            |                             |                    |         |                  |                   |                                                                                 | Fragment-ion (m/z) | 70.065                | 72.080           | 84.080           | 86.097                | 101.064               | 110.071               | 120.079               | 121.083          | 147.075          | 187.108          | 188.112 | 346.173 | 356.223 | 433.239 | 498.282 | 510.275 <sup>+2</sup> | 589.339 | 632.335 | 805.393 <sup>+2</sup> | 828.440 <sup>+2</sup> | 861.419 <sup>+2</sup> | 892.160 <sup>+3</sup> | 922.499 | 1019.548 | 1166.617 | Frac. Inten. (% of TIC) | 0.00 | 0.24 | 0.08 | 0.08 | 2.71 | 0.07 | 0.30 | 3.06 | 2.97 | 13.06 | 3.54 | 2.35 | 3.04 | 3.30 | 2.65 | 17.88 | 4.54 | 4.05 | 2.64 | 3.93 | 2.34 | 3.86 | 6.61 | 11.07 | 5.61 | Rel. Inten. (% of BP) | 0.02 | 1.36 | 0.45 | 0.47 | 15.18 | 0.40 | 1.70 | 17.11 | 16.59 | 73.07 | 19.78 | 13.16 | 17.03 | 18.49 | 14.85 | 100.00 | 25.37 | 22.65 | 14.78 | 21.99 | 13.07 | 21.58 | 37.00 | 61.91 | 31.39 | Score | 0.20 | 0.50 | 0.50 | 0.22 | -0.15 | 1.00 | 1.00 | -0.17 | 16.59 | 0.50 | -0.20 | -0.13 | 0.75 | 1.50 | -0.15 | 100.00 | 1.50 | 0.75 | 14.78 | -0.22 | 0.50 | -0.22 | 1.50 | 1.50 | 1.50 | Ion-type | PR | V | KQ | LI | H | F | F | F | KL | KL | KL | Y <sup>++7</sup> | Y <sup>++7</sup> | Y <sup>++7</sup> | Y <sup>++2</sup> | Y <sup>++2</sup> | Y <sup>++2</sup> | Y <sup>++2</sup> | Y <sup>++2</sup> | Y <sup>++2</sup> | Y <sup>++2</sup> | Y <sup>++2</sup> | Y <sup>++2</sup> | Y <sup>++2</sup> | Y <sup>++2</sup> | Delta ppm | 1.1 | -9.4 | -6.8 | 10.2 |  | -5.2 | -16.5 |  |  |  |  |  |  |  |  |  |  |  |  |  |  |  |  |  |  |
| Fragment-ion (m/z)                                                                                                                                                                                                                                                                                                                                                                                                                                                                                                                                                                                                                                                                                                                                                                                                                                                                                                                                                                                                                                                                                                                                                                                                                                                                                                                                                                                                                                                                                                                                                                                                                                                                                                                                                                                                                                                                                                                                                                                                                                                                                                                                                                                                                                                                                                                                                                                                                                                                                                                                                                                                                                                                                 | 70.065 | 72.080  | 84.080 | 86.097           | 101.064        | 110.071                                                | 120.079                         | 121.083                    | 147.075                     | 187.108            | 188.112 | 346.173          | 356.223           | 433.239                                                                         | 498.282            | 510.275 <sup>+2</sup> | 589.339          | 632.335          | 805.393 <sup>+2</sup> | 828.440 <sup>+2</sup> | 861.419 <sup>+2</sup> | 892.160 <sup>+3</sup> | 922.499          | 1019.548         | 1166.617         |         |         |         |         |         |                       |         |         |                       |                       |                       |                       |         |          |          |                         |      |      |      |      |      |      |      |      |      |       |      |      |      |      |      |       |      |      |      |      |      |      |      |       |      |                       |      |      |      |      |       |      |      |       |       |       |       |       |       |       |       |        |       |       |       |       |       |       |       |       |       |       |      |      |      |      |       |      |      |       |       |      |       |       |      |      |       |        |      |      |       |       |      |       |      |      |      |          |    |   |    |    |   |   |   |   |    |    |    |                  |                  |                  |                  |                  |                  |                  |                  |                  |                  |                  |                  |                  |                  |           |     |      |      |      |  |      |       |  |  |  |  |  |  |  |  |  |  |  |  |  |  |  |  |  |  |
| Frac. Inten. (% of TIC)                                                                                                                                                                                                                                                                                                                                                                                                                                                                                                                                                                                                                                                                                                                                                                                                                                                                                                                                                                                                                                                                                                                                                                                                                                                                                                                                                                                                                                                                                                                                                                                                                                                                                                                                                                                                                                                                                                                                                                                                                                                                                                                                                                                                                                                                                                                                                                                                                                                                                                                                                                                                                                                                            | 0.00   | 0.24    | 0.08   | 0.08             | 2.71           | 0.07                                                   | 0.30                            | 3.06                       | 2.97                        | 13.06              | 3.54    | 2.35             | 3.04              | 3.30                                                                            | 2.65               | 17.88                 | 4.54             | 4.05             | 2.64                  | 3.93                  | 2.34                  | 3.86                  | 6.61             | 11.07            | 5.61             |         |         |         |         |         |                       |         |         |                       |                       |                       |                       |         |          |          |                         |      |      |      |      |      |      |      |      |      |       |      |      |      |      |      |       |      |      |      |      |      |      |      |       |      |                       |      |      |      |      |       |      |      |       |       |       |       |       |       |       |       |        |       |       |       |       |       |       |       |       |       |       |      |      |      |      |       |      |      |       |       |      |       |       |      |      |       |        |      |      |       |       |      |       |      |      |      |          |    |   |    |    |   |   |   |   |    |    |    |                  |                  |                  |                  |                  |                  |                  |                  |                  |                  |                  |                  |                  |                  |           |     |      |      |      |  |      |       |  |  |  |  |  |  |  |  |  |  |  |  |  |  |  |  |  |  |
| Rel. Inten. (% of BP)                                                                                                                                                                                                                                                                                                                                                                                                                                                                                                                                                                                                                                                                                                                                                                                                                                                                                                                                                                                                                                                                                                                                                                                                                                                                                                                                                                                                                                                                                                                                                                                                                                                                                                                                                                                                                                                                                                                                                                                                                                                                                                                                                                                                                                                                                                                                                                                                                                                                                                                                                                                                                                                                              | 0.02   | 1.36    | 0.45   | 0.47             | 15.18          | 0.40                                                   | 1.70                            | 17.11                      | 16.59                       | 73.07              | 19.78   | 13.16            | 17.03             | 18.49                                                                           | 14.85              | 100.00                | 25.37            | 22.65            | 14.78                 | 21.99                 | 13.07                 | 21.58                 | 37.00            | 61.91            | 31.39            |         |         |         |         |         |                       |         |         |                       |                       |                       |                       |         |          |          |                         |      |      |      |      |      |      |      |      |      |       |      |      |      |      |      |       |      |      |      |      |      |      |      |       |      |                       |      |      |      |      |       |      |      |       |       |       |       |       |       |       |       |        |       |       |       |       |       |       |       |       |       |       |      |      |      |      |       |      |      |       |       |      |       |       |      |      |       |        |      |      |       |       |      |       |      |      |      |          |    |   |    |    |   |   |   |   |    |    |    |                  |                  |                  |                  |                  |                  |                  |                  |                  |                  |                  |                  |                  |                  |           |     |      |      |      |  |      |       |  |  |  |  |  |  |  |  |  |  |  |  |  |  |  |  |  |  |
| Score                                                                                                                                                                                                                                                                                                                                                                                                                                                                                                                                                                                                                                                                                                                                                                                                                                                                                                                                                                                                                                                                                                                                                                                                                                                                                                                                                                                                                                                                                                                                                                                                                                                                                                                                                                                                                                                                                                                                                                                                                                                                                                                                                                                                                                                                                                                                                                                                                                                                                                                                                                                                                                                                                              | 0.20   | 0.50    | 0.50   | 0.22             | -0.15          | 1.00                                                   | 1.00                            | -0.17                      | 16.59                       | 0.50               | -0.20   | -0.13            | 0.75              | 1.50                                                                            | -0.15              | 100.00                | 1.50             | 0.75             | 14.78                 | -0.22                 | 0.50                  | -0.22                 | 1.50             | 1.50             | 1.50             |         |         |         |         |         |                       |         |         |                       |                       |                       |                       |         |          |          |                         |      |      |      |      |      |      |      |      |      |       |      |      |      |      |      |       |      |      |      |      |      |      |      |       |      |                       |      |      |      |      |       |      |      |       |       |       |       |       |       |       |       |        |       |       |       |       |       |       |       |       |       |       |      |      |      |      |       |      |      |       |       |      |       |       |      |      |       |        |      |      |       |       |      |       |      |      |      |          |    |   |    |    |   |   |   |   |    |    |    |                  |                  |                  |                  |                  |                  |                  |                  |                  |                  |                  |                  |                  |                  |           |     |      |      |      |  |      |       |  |  |  |  |  |  |  |  |  |  |  |  |  |  |  |  |  |  |
| Ion-type                                                                                                                                                                                                                                                                                                                                                                                                                                                                                                                                                                                                                                                                                                                                                                                                                                                                                                                                                                                                                                                                                                                                                                                                                                                                                                                                                                                                                                                                                                                                                                                                                                                                                                                                                                                                                                                                                                                                                                                                                                                                                                                                                                                                                                                                                                                                                                                                                                                                                                                                                                                                                                                                                           | PR     | V       | KQ     | LI               | H              | F                                                      | F                               | F                          | KL                          | KL                 | KL      | Y <sup>++7</sup> | Y <sup>++7</sup>  | Y <sup>++7</sup>                                                                | Y <sup>++2</sup>   | Y <sup>++2</sup>      | Y <sup>++2</sup> | Y <sup>++2</sup> | Y <sup>++2</sup>      | Y <sup>++2</sup>      | Y <sup>++2</sup>      | Y <sup>++2</sup>      | Y <sup>++2</sup> | Y <sup>++2</sup> | Y <sup>++2</sup> |         |         |         |         |         |                       |         |         |                       |                       |                       |                       |         |          |          |                         |      |      |      |      |      |      |      |      |      |       |      |      |      |      |      |       |      |      |      |      |      |      |      |       |      |                       |      |      |      |      |       |      |      |       |       |       |       |       |       |       |       |        |       |       |       |       |       |       |       |       |       |       |      |      |      |      |       |      |      |       |       |      |       |       |      |      |       |        |      |      |       |       |      |       |      |      |      |          |    |   |    |    |   |   |   |   |    |    |    |                  |                  |                  |                  |                  |                  |                  |                  |                  |                  |                  |                  |                  |                  |           |     |      |      |      |  |      |       |  |  |  |  |  |  |  |  |  |  |  |  |  |  |  |  |  |  |
| Delta ppm                                                                                                                                                                                                                                                                                                                                                                                                                                                                                                                                                                                                                                                                                                                                                                                                                                                                                                                                                                                                                                                                                                                                                                                                                                                                                                                                                                                                                                                                                                                                                                                                                                                                                                                                                                                                                                                                                                                                                                                                                                                                                                                                                                                                                                                                                                                                                                                                                                                                                                                                                                                                                                                                                          | 1.1    | -9.4    | -6.8   | 10.2             |                | -5.2                                                   | -16.5                           |                            |                             |                    |         |                  |                   |                                                                                 |                    |                       |                  |                  |                       |                       |                       |                       |                  |                  |                  |         |         |         |         |         |                       |         |         |                       |                       |                       |                       |         |          |          |                         |      |      |      |      |      |      |      |      |      |       |      |      |      |      |      |       |      |      |      |      |      |      |      |       |      |                       |      |      |      |      |       |      |      |       |       |       |       |       |       |       |       |        |       |       |       |       |       |       |       |       |       |       |      |      |      |      |       |      |      |       |       |      |       |       |      |      |       |        |      |      |       |       |      |       |      |      |      |          |    |   |    |    |   |   |   |   |    |    |    |                  |                  |                  |                  |                  |                  |                  |                  |                  |                  |                  |                  |                  |                  |           |     |      |      |      |  |      |       |  |  |  |  |  |  |  |  |  |  |  |  |  |  |  |  |  |  |

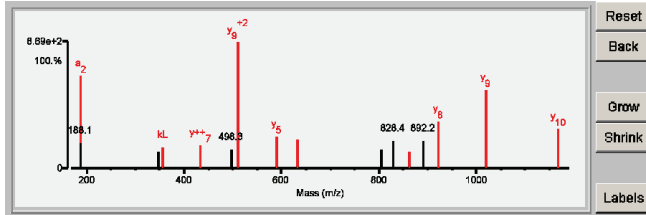



Result Summary

| Rank | Score | SPI (%) | BCS | # Unmatched ions | Variable sites | Sequence                 | MH <sup>+</sup> Calculated (Da) | MH <sup>+</sup> Error (Da) | MH <sup>+</sup> Error (ppm) | Protein MWipl (Da) | Species | Accession # | Protein Name                                                                                                |
|------|-------|---------|-----|------------------|----------------|--------------------------|---------------------------------|----------------------------|-----------------------------|--------------------|---------|-------------|-------------------------------------------------------------------------------------------------------------|
| 1    | 15.15 | 74.0    | 8   | 10/25            | K262k          | (K)ITSDEPLTKDDIPVFLR(H)  | 1959.0433                       | 114.0601                   | 8.3                         | 53489.1/5.12       | HUMAN   | Q9UBB4      | Ataxin-10 OS=Homo sapiens GN=ATXN10 PE=1 SV=1                                                               |
| 2    | 6.93  | 57.6    | 3   | 14/25            | K319k          | (K)LFPELDLIDGELVTLKTR(N) | 1959.0797                       | 114.0237                   | -9.3                        | 42052.4/8.16       | HUMAN   | RP26439     | REVERSE 3 beta-hydroxysteroid dehydrogenase/Delta 5->4-isomerase type 2 OS=Homo sapiens GN=HSD3B2 PE=1 SV=2 |
| 2    | 6.93  | 57.6    | 3   | 14/25            | K169k          | (K)LFPELDLIDGELVTLKTR(N) | 1959.0797                       | 114.0237                   | -9.3                        | 24986.9/5.92       | HUMAN   | RQ6A10      | REVERSE Putative 3-beta-HSD family protein DKFZp686G19280 OS=Homo sapiens PE=5 SV=1                         |

Detailed Results

| Rank | Score | SPI (%) | BCS | # Unmatched ions | Variable sites | Sequence                                | MH <sup>+</sup> Calculated (Da) | MH <sup>+</sup> Error (Da) | MH <sup>+</sup> Error (ppm) | Protein MWipl (Da) | Species | Accession # | MS-Digest Index # | Protein Name                                  |
|------|-------|---------|-----|------------------|----------------|-----------------------------------------|---------------------------------|----------------------------|-----------------------------|--------------------|---------|-------------|-------------------|-----------------------------------------------|
| 1    | 15.15 | 74.0    | 8   | 10/25            | K262k          | (K)I/T/S/D/E/P/L/T/K/D/D/I/P/V/F/L/R(H) | 1959.0433                       | 114.0601                   | 8.3                         | 53489.1/5.12       | HUMAN   | Q9UBB4      | 62417             | Ataxin-10 OS=Homo sapiens GN=ATXN10 PE=1 SV=1 |

  

| Fragment-Ion (m/z)     | 70.064 | 72.081 | 84.080 | 86.096 | 142.119 | 173.123 | 175.114 | 183.149 | 187.149             | 197.127             | 215.135 | 311.113 | 316.200 | 483.263 | 631.397 | 643.415 <sup>+2</sup> | 659.372 <sup>+2</sup> | 744.467 | 764.432 <sup>+2</sup> | 850.928 <sup>+2</sup> | 897.470 | 907.993 | 929.975 <sup>+2</sup> | 974.542 | 980.498 <sup>+2</sup> |
|------------------------|--------|--------|--------|--------|---------|---------|---------|---------|---------------------|---------------------|---------|---------|---------|---------|---------|-----------------------|-----------------------|---------|-----------------------|-----------------------|---------|---------|-----------------------|---------|-----------------------|
| Frac. Inten.(% of TIC) | 0.00   | 0.05   | 4.00   | 13.18  | 2.98    | 2.39    | 2.33    | 2.88    | 2.87                | 2.87                | 4.05    | 1.85    | 2.90    | 3.71    | 16.81   | 1.99                  | 3.09                  | 3.68    | 8.44                  | 1.88                  | 2.44    | 1.89    | 7.11                  | 2.50    | 4.10                  |
| Rel. Inten.(% of BP)   | 0.01   | 0.31   | 23.78  | 78.43  | 17.76   | 14.23   | 13.84   | 17.14   | 17.07               | 24.09               | 10.99   | 17.27   | 22.04   | 100.00  | 11.85   | 18.41                 | 21.88                 | 50.18   | 11.15                 | 14.50                 | 11.26   | 42.31   | 14.89                 | 24.41   |                       |
| Score                  | 0.20   | 0.50   | -0.24  | 0.50   | -0.18   | -0.14   | 1.50    | -0.17   | 0.50                | 0.75                | 0.75    | -0.11   | -0.22   | 1.50    | -0.12   | 1.50                  | 1.50                  | 1.50    | -0.11                 | -0.14                 | -0.11   | 1.50    | 1.50                  | 1.50    |                       |
| Ion-type               | PR     | V      |        | a1     |         |         | y1      | a2      | b2-H <sub>2</sub> O | b2                  |         |         | y++5    | y5      |         | y10 <sup>+2</sup>     |                       | y6      | y12 <sup>+2</sup>     |                       |         |         | y15 <sup>+2</sup>     | y6      |                       |
| Delta ppm              | -13.2  | 0.3    |        | -14.2  |         |         | -30.0   |         | 23.0                | -14.0               |         |         | 1.8     | 6.3     |         | 15.3                  |                       | -12.9   | 2.2                   |                       |         |         | -6.2                  | 11.6    | -7.0                  |
|                        |        |        |        | 0.50   |         |         |         |         | LT-28               | PV                  |         |         |         |         |         |                       |                       |         |                       |                       |         |         |                       |         |                       |
|                        |        |        |        | LI     |         |         |         |         | 23.0                | LT-H <sub>2</sub> O |         |         |         |         |         |                       |                       |         |                       |                       |         |         |                       |         |                       |
|                        |        |        |        | -1.5   |         |         |         |         | -14.0               | -25.2               |         |         |         |         |         |                       |                       |         |                       |                       |         |         |                       |         |                       |
|                        |        |        |        |        |         |         |         |         | -14.0               | -14.0               |         |         |         |         |         |                       |                       |         |                       |                       |         |         |                       |         |                       |

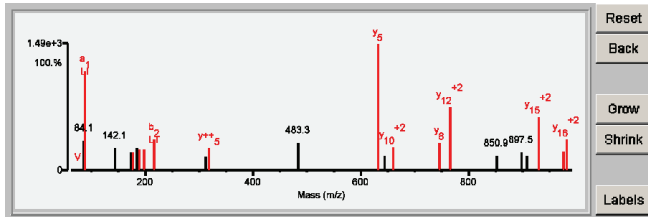

Result Summary

| Rank | Score | SPI (%) | BCS | # Unmatched Ions | Variable sites | Sequence                | MH <sup>+</sup> Calculated (Da) | MH <sup>+</sup> Error (Da) | MH <sup>+</sup> Error (ppm) | Protein MW/pl (Da) | Species | Accession # | Protein Name                                                                               |
|------|-------|---------|-----|------------------|----------------|-------------------------|---------------------------------|----------------------------|-----------------------------|--------------------|---------|-------------|--------------------------------------------------------------------------------------------|
| 1    | 23.10 | 77.8    | 10  | 4/25             | K117k          | (R)SFGICNYKEHWFTVR(K)   | 1886.9007                       | 114.0543                   | 5.7                         | 43417.8/4.86       | HUMAN   | P54252      | Ataxin-3 OS=Homo sapiens GN=ATXN3 PE=1 SV=3                                                |
| 2    | 8.88  | 50.5    | 4   | 13/25            | M99m M100m     | (K)SFLGPLSPSCKMVQmmR(Q) | 1968.9526                       | 32.0023                    | 6.3                         | 57915.4/8.35       | HUMAN   | Q8N8W4      | Patatin-like phospholipase domain-containing protein 1 OS=Homo sapiens GN=PNPLA1 PE=2 SV=2 |
| 3    | 7.88  | 50.5    | 3   | 13/25            | M96m M100m     | (K)SFLGPLSPSCKmVQMMr(Q) | 1968.9526                       | 32.0023                    | 6.3                         | 57915.4/8.35       | HUMAN   | Q8N8W4      | Patatin-like phospholipase domain-containing protein 1 OS=Homo sapiens GN=PNPLA1 PE=2 SV=2 |
| 3    | 7.88  | 50.5    | 3   | 13/25            | M96m M99m      | (K)SFLGPLSPSCKmVQmMR(Q) | 1968.9526                       | 32.0023                    | 6.3                         | 57915.4/8.35       | HUMAN   | Q8N8W4      | Patatin-like phospholipase domain-containing protein 1 OS=Homo sapiens GN=PNPLA1 PE=2 SV=2 |

Detailed Results

| Rank                                                                                                                                                                                                                                                                                                                                                                                                                                                                                                                                                                                                                                                                                                                                                                                                                                                                                                                                                                                                                                                                                                                                                                                                                                                                                                                                                                                                                                                                                                                                                                                                                                                                                                                                                                                                                                                                                                                                                                                                                                                                                                                                                                                                                                                                                                                                                                                                                                                                                                                                                                                                                                                                                                                                                                                                                                                                | Score          | SPI (%) | BCS    | # Unmatched Ions | Variable sites | Sequence                                               | MH <sup>+</sup> Calculated (Da) | MH <sup>+</sup> Error (Da) | MH <sup>+</sup> Error (ppm) | Protein MW/pl (Da) | Species | Accession #    | MS-Digest Index # | Protein Name                                |                    |                               |                               |                              |                              |                |                               |                                              |                               |                |                |         |         |         |         |         |                       |                       |                       |                       |         |                       |                       |                       |         |         |                         |      |       |      |      |      |      |      |      |      |      |      |      |       |      |      |      |      |      |      |      |      |      |      |      |      |                       |       |       |      |      |      |      |       |       |      |      |       |       |        |       |       |       |       |       |       |       |       |       |       |       |       |       |      |       |      |      |      |      |       |       |      |      |       |      |      |      |      |      |      |      |      |      |      |      |      |      |      |          |                |  |    |    |   |   |  |  |   |   |  |                |                |                |                |                               |                               |                              |                              |                |                               |                                              |                               |                |                |           |       |  |      |      |       |      |  |  |      |       |  |       |       |      |      |      |     |     |      |     |     |     |     |      |     |
|---------------------------------------------------------------------------------------------------------------------------------------------------------------------------------------------------------------------------------------------------------------------------------------------------------------------------------------------------------------------------------------------------------------------------------------------------------------------------------------------------------------------------------------------------------------------------------------------------------------------------------------------------------------------------------------------------------------------------------------------------------------------------------------------------------------------------------------------------------------------------------------------------------------------------------------------------------------------------------------------------------------------------------------------------------------------------------------------------------------------------------------------------------------------------------------------------------------------------------------------------------------------------------------------------------------------------------------------------------------------------------------------------------------------------------------------------------------------------------------------------------------------------------------------------------------------------------------------------------------------------------------------------------------------------------------------------------------------------------------------------------------------------------------------------------------------------------------------------------------------------------------------------------------------------------------------------------------------------------------------------------------------------------------------------------------------------------------------------------------------------------------------------------------------------------------------------------------------------------------------------------------------------------------------------------------------------------------------------------------------------------------------------------------------------------------------------------------------------------------------------------------------------------------------------------------------------------------------------------------------------------------------------------------------------------------------------------------------------------------------------------------------------------------------------------------------------------------------------------------------|----------------|---------|--------|------------------|----------------|--------------------------------------------------------|---------------------------------|----------------------------|-----------------------------|--------------------|---------|----------------|-------------------|---------------------------------------------|--------------------|-------------------------------|-------------------------------|------------------------------|------------------------------|----------------|-------------------------------|----------------------------------------------|-------------------------------|----------------|----------------|---------|---------|---------|---------|---------|-----------------------|-----------------------|-----------------------|-----------------------|---------|-----------------------|-----------------------|-----------------------|---------|---------|-------------------------|------|-------|------|------|------|------|------|------|------|------|------|------|-------|------|------|------|------|------|------|------|------|------|------|------|------|-----------------------|-------|-------|------|------|------|------|-------|-------|------|------|-------|-------|--------|-------|-------|-------|-------|-------|-------|-------|-------|-------|-------|-------|-------|-------|------|-------|------|------|------|------|-------|-------|------|------|-------|------|------|------|------|------|------|------|------|------|------|------|------|------|------|----------|----------------|--|----|----|---|---|--|--|---|---|--|----------------|----------------|----------------|----------------|-------------------------------|-------------------------------|------------------------------|------------------------------|----------------|-------------------------------|----------------------------------------------|-------------------------------|----------------|----------------|-----------|-------|--|------|------|-------|------|--|--|------|-------|--|-------|-------|------|------|------|-----|-----|------|-----|-----|-----|-----|------|-----|
| 1                                                                                                                                                                                                                                                                                                                                                                                                                                                                                                                                                                                                                                                                                                                                                                                                                                                                                                                                                                                                                                                                                                                                                                                                                                                                                                                                                                                                                                                                                                                                                                                                                                                                                                                                                                                                                                                                                                                                                                                                                                                                                                                                                                                                                                                                                                                                                                                                                                                                                                                                                                                                                                                                                                                                                                                                                                                                   | 23.10          | 77.8    | 10     | 4/25             | K117k          | (R)S F I I / C / N / Y / K / E / H / W / F T V / R (K) | 1886.9007                       | 114.0543                   | 5.7                         | 43417.8/4.86       | HUMAN   | P54252         | 62477             | Ataxin-3 OS=Homo sapiens GN=ATXN3 PE=1 SV=3 |                    |                               |                               |                              |                              |                |                               |                                              |                               |                |                |         |         |         |         |         |                       |                       |                       |                       |         |                       |                       |                       |         |         |                         |      |       |      |      |      |      |      |      |      |      |      |      |       |      |      |      |      |      |      |      |      |      |      |      |      |                       |       |       |      |      |      |      |       |       |      |      |       |       |        |       |       |       |       |       |       |       |       |       |       |       |       |       |      |       |      |      |      |      |       |       |      |      |       |      |      |      |      |      |      |      |      |      |      |      |      |      |      |          |                |  |    |    |   |   |  |  |   |   |  |                |                |                |                |                               |                               |                              |                              |                |                               |                                              |                               |                |                |           |       |  |      |      |       |      |  |  |      |       |  |       |       |      |      |      |     |     |      |     |     |     |     |      |     |
| <table border="1"> <thead> <tr> <th>Fragment-ion (m/z)</th> <th>60.044</th> <th>84.080</th> <th>86.096</th> <th>87.055</th> <th>110.069</th> <th>120.080</th> <th>131.117</th> <th>133.040</th> <th>136.074</th> <th>159.089</th> <th>162.089</th> <th>175.117</th> <th>207.112</th> <th>235.108</th> <th>522.302</th> <th>551.933<sup>+3</sup></th> <th>589.620<sup>+3</sup></th> <th>608.816<sup>+2</sup></th> <th>690.343<sup>+2</sup></th> <th>708.387</th> <th>747.370<sup>+2</sup></th> <th>818.873<sup>+2</sup></th> <th>827.390<sup>+2</sup></th> <th>845.436</th> <th>974.490</th> </tr> </thead> <tbody> <tr> <td>Frac. Inten. (% of TIC)</td> <td>5.66</td> <td>11.58</td> <td>0.79</td> <td>0.14</td> <td>0.13</td> <td>0.46</td> <td>3.53</td> <td>3.94</td> <td>0.16</td> <td>0.09</td> <td>3.11</td> <td>5.67</td> <td>23.11</td> <td>3.00</td> <td>5.19</td> <td>2.79</td> <td>3.02</td> <td>3.48</td> <td>3.24</td> <td>5.07</td> <td>3.23</td> <td>2.74</td> <td>3.41</td> <td>3.67</td> <td>2.79</td> </tr> <tr> <td>Rel. Inten. (% of BP)</td> <td>24.51</td> <td>50.12</td> <td>3.40</td> <td>0.63</td> <td>0.57</td> <td>1.99</td> <td>15.28</td> <td>17.07</td> <td>0.71</td> <td>0.40</td> <td>13.45</td> <td>24.54</td> <td>100.00</td> <td>12.96</td> <td>22.47</td> <td>12.06</td> <td>13.09</td> <td>15.06</td> <td>14.02</td> <td>21.95</td> <td>13.96</td> <td>11.84</td> <td>14.77</td> <td>15.88</td> <td>12.09</td> </tr> <tr> <td>Score</td> <td>0.50</td> <td>-0.50</td> <td>0.22</td> <td>0.33</td> <td>1.00</td> <td>1.00</td> <td>-0.15</td> <td>-0.17</td> <td>1.00</td> <td>2.00</td> <td>-0.13</td> <td>1.50</td> <td>0.50</td> <td>1.50</td> <td>1.50</td> <td>1.50</td> <td>1.50</td> <td>1.50</td> <td>1.50</td> <td>1.50</td> <td>1.50</td> <td>0.50</td> <td>1.50</td> <td>1.50</td> <td>1.50</td> </tr> <tr> <td>Ion-type</td> <td>a<sub>1</sub></td> <td></td> <td>LI</td> <td>NR</td> <td>H</td> <td>F</td> <td></td> <td></td> <td>Y</td> <td>W</td> <td></td> <td>y<sub>1</sub></td> <td>a<sub>2</sub></td> <td>b<sub>2</sub></td> <td>y<sub>4</sub></td> <td>y<sub>11</sub><sup>+3</sup></td> <td>y<sub>12</sub><sup>+3</sup></td> <td>y<sub>6</sub><sup>+2</sup></td> <td>y<sub>9</sub><sup>+2</sup></td> <td>y<sub>5</sub></td> <td>y<sub>10</sub><sup>+2</sup></td> <td>y<sub>11-NH<sub>3</sub></sub><sup>+2</sup></td> <td>y<sub>11</sub><sup>+2</sup></td> <td>y<sub>6</sub></td> <td>y<sub>7</sub></td> </tr> <tr> <td>Delta ppm</td> <td>-18.1</td> <td></td> <td>-9.6</td> <td>-3.3</td> <td>-19.7</td> <td>-9.0</td> <td></td> <td></td> <td>-9.5</td> <td>-16.2</td> <td></td> <td>-11.7</td> <td>-10.1</td> <td>-4.7</td> <td>-3.6</td> <td>16.3</td> <td>0.6</td> <td>5.7</td> <td>-4.8</td> <td>5.7</td> <td>2.5</td> <td>4.2</td> <td>7.7</td> <td>-6.6</td> <td>5.4</td> </tr> </tbody> </table> |                |         |        |                  |                |                                                        |                                 |                            |                             |                    |         |                |                   |                                             | Fragment-ion (m/z) | 60.044                        | 84.080                        | 86.096                       | 87.055                       | 110.069        | 120.080                       | 131.117                                      | 133.040                       | 136.074        | 159.089        | 162.089 | 175.117 | 207.112 | 235.108 | 522.302 | 551.933 <sup>+3</sup> | 589.620 <sup>+3</sup> | 608.816 <sup>+2</sup> | 690.343 <sup>+2</sup> | 708.387 | 747.370 <sup>+2</sup> | 818.873 <sup>+2</sup> | 827.390 <sup>+2</sup> | 845.436 | 974.490 | Frac. Inten. (% of TIC) | 5.66 | 11.58 | 0.79 | 0.14 | 0.13 | 0.46 | 3.53 | 3.94 | 0.16 | 0.09 | 3.11 | 5.67 | 23.11 | 3.00 | 5.19 | 2.79 | 3.02 | 3.48 | 3.24 | 5.07 | 3.23 | 2.74 | 3.41 | 3.67 | 2.79 | Rel. Inten. (% of BP) | 24.51 | 50.12 | 3.40 | 0.63 | 0.57 | 1.99 | 15.28 | 17.07 | 0.71 | 0.40 | 13.45 | 24.54 | 100.00 | 12.96 | 22.47 | 12.06 | 13.09 | 15.06 | 14.02 | 21.95 | 13.96 | 11.84 | 14.77 | 15.88 | 12.09 | Score | 0.50 | -0.50 | 0.22 | 0.33 | 1.00 | 1.00 | -0.15 | -0.17 | 1.00 | 2.00 | -0.13 | 1.50 | 0.50 | 1.50 | 1.50 | 1.50 | 1.50 | 1.50 | 1.50 | 1.50 | 1.50 | 0.50 | 1.50 | 1.50 | 1.50 | Ion-type | a <sub>1</sub> |  | LI | NR | H | F |  |  | Y | W |  | y <sub>1</sub> | a <sub>2</sub> | b <sub>2</sub> | y <sub>4</sub> | y <sub>11</sub> <sup>+3</sup> | y <sub>12</sub> <sup>+3</sup> | y <sub>6</sub> <sup>+2</sup> | y <sub>9</sub> <sup>+2</sup> | y <sub>5</sub> | y <sub>10</sub> <sup>+2</sup> | y <sub>11-NH<sub>3</sub></sub> <sup>+2</sup> | y <sub>11</sub> <sup>+2</sup> | y <sub>6</sub> | y <sub>7</sub> | Delta ppm | -18.1 |  | -9.6 | -3.3 | -19.7 | -9.0 |  |  | -9.5 | -16.2 |  | -11.7 | -10.1 | -4.7 | -3.6 | 16.3 | 0.6 | 5.7 | -4.8 | 5.7 | 2.5 | 4.2 | 7.7 | -6.6 | 5.4 |
| Fragment-ion (m/z)                                                                                                                                                                                                                                                                                                                                                                                                                                                                                                                                                                                                                                                                                                                                                                                                                                                                                                                                                                                                                                                                                                                                                                                                                                                                                                                                                                                                                                                                                                                                                                                                                                                                                                                                                                                                                                                                                                                                                                                                                                                                                                                                                                                                                                                                                                                                                                                                                                                                                                                                                                                                                                                                                                                                                                                                                                                  | 60.044         | 84.080  | 86.096 | 87.055           | 110.069        | 120.080                                                | 131.117                         | 133.040                    | 136.074                     | 159.089            | 162.089 | 175.117        | 207.112           | 235.108                                     | 522.302            | 551.933 <sup>+3</sup>         | 589.620 <sup>+3</sup>         | 608.816 <sup>+2</sup>        | 690.343 <sup>+2</sup>        | 708.387        | 747.370 <sup>+2</sup>         | 818.873 <sup>+2</sup>                        | 827.390 <sup>+2</sup>         | 845.436        | 974.490        |         |         |         |         |         |                       |                       |                       |                       |         |                       |                       |                       |         |         |                         |      |       |      |      |      |      |      |      |      |      |      |      |       |      |      |      |      |      |      |      |      |      |      |      |      |                       |       |       |      |      |      |      |       |       |      |      |       |       |        |       |       |       |       |       |       |       |       |       |       |       |       |       |      |       |      |      |      |      |       |       |      |      |       |      |      |      |      |      |      |      |      |      |      |      |      |      |      |          |                |  |    |    |   |   |  |  |   |   |  |                |                |                |                |                               |                               |                              |                              |                |                               |                                              |                               |                |                |           |       |  |      |      |       |      |  |  |      |       |  |       |       |      |      |      |     |     |      |     |     |     |     |      |     |
| Frac. Inten. (% of TIC)                                                                                                                                                                                                                                                                                                                                                                                                                                                                                                                                                                                                                                                                                                                                                                                                                                                                                                                                                                                                                                                                                                                                                                                                                                                                                                                                                                                                                                                                                                                                                                                                                                                                                                                                                                                                                                                                                                                                                                                                                                                                                                                                                                                                                                                                                                                                                                                                                                                                                                                                                                                                                                                                                                                                                                                                                                             | 5.66           | 11.58   | 0.79   | 0.14             | 0.13           | 0.46                                                   | 3.53                            | 3.94                       | 0.16                        | 0.09               | 3.11    | 5.67           | 23.11             | 3.00                                        | 5.19               | 2.79                          | 3.02                          | 3.48                         | 3.24                         | 5.07           | 3.23                          | 2.74                                         | 3.41                          | 3.67           | 2.79           |         |         |         |         |         |                       |                       |                       |                       |         |                       |                       |                       |         |         |                         |      |       |      |      |      |      |      |      |      |      |      |      |       |      |      |      |      |      |      |      |      |      |      |      |      |                       |       |       |      |      |      |      |       |       |      |      |       |       |        |       |       |       |       |       |       |       |       |       |       |       |       |       |      |       |      |      |      |      |       |       |      |      |       |      |      |      |      |      |      |      |      |      |      |      |      |      |      |          |                |  |    |    |   |   |  |  |   |   |  |                |                |                |                |                               |                               |                              |                              |                |                               |                                              |                               |                |                |           |       |  |      |      |       |      |  |  |      |       |  |       |       |      |      |      |     |     |      |     |     |     |     |      |     |
| Rel. Inten. (% of BP)                                                                                                                                                                                                                                                                                                                                                                                                                                                                                                                                                                                                                                                                                                                                                                                                                                                                                                                                                                                                                                                                                                                                                                                                                                                                                                                                                                                                                                                                                                                                                                                                                                                                                                                                                                                                                                                                                                                                                                                                                                                                                                                                                                                                                                                                                                                                                                                                                                                                                                                                                                                                                                                                                                                                                                                                                                               | 24.51          | 50.12   | 3.40   | 0.63             | 0.57           | 1.99                                                   | 15.28                           | 17.07                      | 0.71                        | 0.40               | 13.45   | 24.54          | 100.00            | 12.96                                       | 22.47              | 12.06                         | 13.09                         | 15.06                        | 14.02                        | 21.95          | 13.96                         | 11.84                                        | 14.77                         | 15.88          | 12.09          |         |         |         |         |         |                       |                       |                       |                       |         |                       |                       |                       |         |         |                         |      |       |      |      |      |      |      |      |      |      |      |      |       |      |      |      |      |      |      |      |      |      |      |      |      |                       |       |       |      |      |      |      |       |       |      |      |       |       |        |       |       |       |       |       |       |       |       |       |       |       |       |       |      |       |      |      |      |      |       |       |      |      |       |      |      |      |      |      |      |      |      |      |      |      |      |      |      |          |                |  |    |    |   |   |  |  |   |   |  |                |                |                |                |                               |                               |                              |                              |                |                               |                                              |                               |                |                |           |       |  |      |      |       |      |  |  |      |       |  |       |       |      |      |      |     |     |      |     |     |     |     |      |     |
| Score                                                                                                                                                                                                                                                                                                                                                                                                                                                                                                                                                                                                                                                                                                                                                                                                                                                                                                                                                                                                                                                                                                                                                                                                                                                                                                                                                                                                                                                                                                                                                                                                                                                                                                                                                                                                                                                                                                                                                                                                                                                                                                                                                                                                                                                                                                                                                                                                                                                                                                                                                                                                                                                                                                                                                                                                                                                               | 0.50           | -0.50   | 0.22   | 0.33             | 1.00           | 1.00                                                   | -0.15                           | -0.17                      | 1.00                        | 2.00               | -0.13   | 1.50           | 0.50              | 1.50                                        | 1.50               | 1.50                          | 1.50                          | 1.50                         | 1.50                         | 1.50           | 1.50                          | 0.50                                         | 1.50                          | 1.50           | 1.50           |         |         |         |         |         |                       |                       |                       |                       |         |                       |                       |                       |         |         |                         |      |       |      |      |      |      |      |      |      |      |      |      |       |      |      |      |      |      |      |      |      |      |      |      |      |                       |       |       |      |      |      |      |       |       |      |      |       |       |        |       |       |       |       |       |       |       |       |       |       |       |       |       |      |       |      |      |      |      |       |       |      |      |       |      |      |      |      |      |      |      |      |      |      |      |      |      |      |          |                |  |    |    |   |   |  |  |   |   |  |                |                |                |                |                               |                               |                              |                              |                |                               |                                              |                               |                |                |           |       |  |      |      |       |      |  |  |      |       |  |       |       |      |      |      |     |     |      |     |     |     |     |      |     |
| Ion-type                                                                                                                                                                                                                                                                                                                                                                                                                                                                                                                                                                                                                                                                                                                                                                                                                                                                                                                                                                                                                                                                                                                                                                                                                                                                                                                                                                                                                                                                                                                                                                                                                                                                                                                                                                                                                                                                                                                                                                                                                                                                                                                                                                                                                                                                                                                                                                                                                                                                                                                                                                                                                                                                                                                                                                                                                                                            | a <sub>1</sub> |         | LI     | NR               | H              | F                                                      |                                 |                            | Y                           | W                  |         | y <sub>1</sub> | a <sub>2</sub>    | b <sub>2</sub>                              | y <sub>4</sub>     | y <sub>11</sub> <sup>+3</sup> | y <sub>12</sub> <sup>+3</sup> | y <sub>6</sub> <sup>+2</sup> | y <sub>9</sub> <sup>+2</sup> | y <sub>5</sub> | y <sub>10</sub> <sup>+2</sup> | y <sub>11-NH<sub>3</sub></sub> <sup>+2</sup> | y <sub>11</sub> <sup>+2</sup> | y <sub>6</sub> | y <sub>7</sub> |         |         |         |         |         |                       |                       |                       |                       |         |                       |                       |                       |         |         |                         |      |       |      |      |      |      |      |      |      |      |      |      |       |      |      |      |      |      |      |      |      |      |      |      |      |                       |       |       |      |      |      |      |       |       |      |      |       |       |        |       |       |       |       |       |       |       |       |       |       |       |       |       |      |       |      |      |      |      |       |       |      |      |       |      |      |      |      |      |      |      |      |      |      |      |      |      |      |          |                |  |    |    |   |   |  |  |   |   |  |                |                |                |                |                               |                               |                              |                              |                |                               |                                              |                               |                |                |           |       |  |      |      |       |      |  |  |      |       |  |       |       |      |      |      |     |     |      |     |     |     |     |      |     |
| Delta ppm                                                                                                                                                                                                                                                                                                                                                                                                                                                                                                                                                                                                                                                                                                                                                                                                                                                                                                                                                                                                                                                                                                                                                                                                                                                                                                                                                                                                                                                                                                                                                                                                                                                                                                                                                                                                                                                                                                                                                                                                                                                                                                                                                                                                                                                                                                                                                                                                                                                                                                                                                                                                                                                                                                                                                                                                                                                           | -18.1          |         | -9.6   | -3.3             | -19.7          | -9.0                                                   |                                 |                            | -9.5                        | -16.2              |         | -11.7          | -10.1             | -4.7                                        | -3.6               | 16.3                          | 0.6                           | 5.7                          | -4.8                         | 5.7            | 2.5                           | 4.2                                          | 7.7                           | -6.6           | 5.4            |         |         |         |         |         |                       |                       |                       |                       |         |                       |                       |                       |         |         |                         |      |       |      |      |      |      |      |      |      |      |      |      |       |      |      |      |      |      |      |      |      |      |      |      |      |                       |       |       |      |      |      |      |       |       |      |      |       |       |        |       |       |       |       |       |       |       |       |       |       |       |       |       |      |       |      |      |      |      |       |       |      |      |       |      |      |      |      |      |      |      |      |      |      |      |      |      |      |          |                |  |    |    |   |   |  |  |   |   |  |                |                |                |                |                               |                               |                              |                              |                |                               |                                              |                               |                |                |           |       |  |      |      |       |      |  |  |      |       |  |       |       |      |      |      |     |     |      |     |     |     |     |      |     |

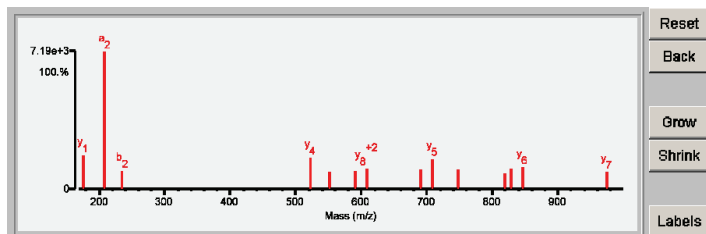

Reset

Back

Grow

Shrink

Labels

Result Summary

| Rank | Score | SPI (%) | BCS | # Unmatched Ions | Variable sites | Sequence           | MH <sup>+</sup> Calculated (Da) | MH <sup>+</sup> Error (Da) | MH <sup>+</sup> Error (ppm) | Protein MW/pl (Da) | Species | Accession # | Protein Name                                |
|------|-------|---------|-----|------------------|----------------|--------------------|---------------------------------|----------------------------|-----------------------------|--------------------|---------|-------------|---------------------------------------------|
| 1    | 19.91 | 91.8    | 8   | 4/25             | K200k          | (K)LIGEELAQLEQR(V) | 1526.8537                       | 114.0533                   | 6.3                         | 43417.8/4.86       | HUMAN   | P54252      | Ataxin-3 OS=Homo sapiens GN=ATXN3 PE=1 SV=3 |

Detailed Results

| Rank                                                                                                                                                                                                                                                                                                                                                                                                                                                                                                                                                                                                                                                                                                                                                                                                                                                                                                                                                                                                                                                                                                                                                                                                                                                                                                                                                                                                                                                                                                                                                                                                                                                                                                                                                                                                                                                                                                                                                                                                                                                                                                                                                                                                                                                                                                                                                                                                                                                                                                                                                                                                                                                                                                                                                                              | Score  | SPI (%) | BCS    | # Unmatched Ions | Variable sites | Sequence           | MH <sup>+</sup> Calculated (Da) | MH <sup>+</sup> Error (Da) | MH <sup>+</sup> Error (ppm) | Protein MW/pl (Da) | Species | Accession # | MS-Digest Index # | Protein Name                                |                    |         |           |           |         |         |           |         |         |         |         |         |         |         |           |         |         |           |           |         |         |           |         |         |         |         |                        |      |      |       |      |      |      |      |      |      |      |      |      |      |      |      |      |      |      |      |      |      |      |      |      |      |                      |      |      |        |      |      |      |       |       |       |      |      |       |      |      |       |      |      |      |      |       |       |       |      |       |       |       |      |      |      |       |      |       |      |      |      |      |      |      |      |      |      |       |      |       |      |      |      |      |      |      |      |          |    |    |    |  |        |  |    |    |    |    |    |    |     |      |    |  |      |  |    |    |  |       |    |        |    |           |     |       |     |  |       |  |     |     |       |      |       |      |     |     |  |  |       |  |      |       |  |      |       |     |     |  |  |  |    |      |  |  |  |  |  |  |  |  |  |  |  |  |  |  |  |  |  |  |  |  |  |
|-----------------------------------------------------------------------------------------------------------------------------------------------------------------------------------------------------------------------------------------------------------------------------------------------------------------------------------------------------------------------------------------------------------------------------------------------------------------------------------------------------------------------------------------------------------------------------------------------------------------------------------------------------------------------------------------------------------------------------------------------------------------------------------------------------------------------------------------------------------------------------------------------------------------------------------------------------------------------------------------------------------------------------------------------------------------------------------------------------------------------------------------------------------------------------------------------------------------------------------------------------------------------------------------------------------------------------------------------------------------------------------------------------------------------------------------------------------------------------------------------------------------------------------------------------------------------------------------------------------------------------------------------------------------------------------------------------------------------------------------------------------------------------------------------------------------------------------------------------------------------------------------------------------------------------------------------------------------------------------------------------------------------------------------------------------------------------------------------------------------------------------------------------------------------------------------------------------------------------------------------------------------------------------------------------------------------------------------------------------------------------------------------------------------------------------------------------------------------------------------------------------------------------------------------------------------------------------------------------------------------------------------------------------------------------------------------------------------------------------------------------------------------------------|--------|---------|--------|------------------|----------------|--------------------|---------------------------------|----------------------------|-----------------------------|--------------------|---------|-------------|-------------------|---------------------------------------------|--------------------|---------|-----------|-----------|---------|---------|-----------|---------|---------|---------|---------|---------|---------|---------|-----------|---------|---------|-----------|-----------|---------|---------|-----------|---------|---------|---------|---------|------------------------|------|------|-------|------|------|------|------|------|------|------|------|------|------|------|------|------|------|------|------|------|------|------|------|------|------|----------------------|------|------|--------|------|------|------|-------|-------|-------|------|------|-------|------|------|-------|------|------|------|------|-------|-------|-------|------|-------|-------|-------|------|------|------|-------|------|-------|------|------|------|------|------|------|------|------|------|-------|------|-------|------|------|------|------|------|------|------|----------|----|----|----|--|--------|--|----|----|----|----|----|----|-----|------|----|--|------|--|----|----|--|-------|----|--------|----|-----------|-----|-------|-----|--|-------|--|-----|-----|-------|------|-------|------|-----|-----|--|--|-------|--|------|-------|--|------|-------|-----|-----|--|--|--|----|------|--|--|--|--|--|--|--|--|--|--|--|--|--|--|--|--|--|--|--|--|--|
| 1                                                                                                                                                                                                                                                                                                                                                                                                                                                                                                                                                                                                                                                                                                                                                                                                                                                                                                                                                                                                                                                                                                                                                                                                                                                                                                                                                                                                                                                                                                                                                                                                                                                                                                                                                                                                                                                                                                                                                                                                                                                                                                                                                                                                                                                                                                                                                                                                                                                                                                                                                                                                                                                                                                                                                                                 | 19.91  | 91.8    | 8      | 4/25             | K200k          | (K)LIGEELAQLEQR(V) | 1526.8537                       | 114.0533                   | 6.3                         | 43417.8/4.86       | HUMAN   | P54252      | 62477             | Ataxin-3 OS=Homo sapiens GN=ATXN3 PE=1 SV=3 |                    |         |           |           |         |         |           |         |         |         |         |         |         |         |           |         |         |           |           |         |         |           |         |         |         |         |                        |      |      |       |      |      |      |      |      |      |      |      |      |      |      |      |      |      |      |      |      |      |      |      |      |      |                      |      |      |        |      |      |      |       |       |       |      |      |       |      |      |       |      |      |      |      |       |       |       |      |       |       |       |      |      |      |       |      |       |      |      |      |      |      |      |      |      |      |       |      |       |      |      |      |      |      |      |      |          |    |    |    |  |        |  |    |    |    |    |    |    |     |      |    |  |      |  |    |    |  |       |    |        |    |           |     |       |     |  |       |  |     |     |       |      |       |      |     |     |  |  |       |  |      |       |  |      |       |     |     |  |  |  |    |      |  |  |  |  |  |  |  |  |  |  |  |  |  |  |  |  |  |  |  |  |  |
| <table border="1"> <thead> <tr> <th>Fragment-ion (m/z)</th> <th>70.066</th> <th>84.080</th> <th>86.098</th> <th>87.102</th> <th>158.089</th> <th>159.070</th> <th>187.074</th> <th>199.182</th> <th>200.101</th> <th>227.176</th> <th>259.089</th> <th>303.181</th> <th>316.117</th> <th>394.228*2</th> <th>432.207</th> <th>476.244</th> <th>550.304*2</th> <th>650.850*2</th> <th>655.361</th> <th>674.348</th> <th>707.875*2</th> <th>787.433</th> <th>898.483</th> <th>915.505</th> <th>986.524</th> </tr> </thead> <tbody> <tr> <td>Frac. Inten.(% of TIC)</td> <td>0.00</td> <td>0.12</td> <td>28.13</td> <td>2.00</td> <td>1.99</td> <td>2.65</td> <td>6.38</td> <td>9.14</td> <td>2.91</td> <td>1.57</td> <td>2.08</td> <td>4.35</td> <td>2.11</td> <td>1.74</td> <td>3.10</td> <td>1.76</td> <td>1.58</td> <td>1.76</td> <td>2.41</td> <td>5.16</td> <td>4.69</td> <td>5.31</td> <td>1.97</td> <td>3.16</td> <td>3.94</td> </tr> <tr> <td>Rel. Inten.(% of BP)</td> <td>0.01</td> <td>0.44</td> <td>100.00</td> <td>7.11</td> <td>7.06</td> <td>9.44</td> <td>22.69</td> <td>32.48</td> <td>10.36</td> <td>5.57</td> <td>7.39</td> <td>15.45</td> <td>7.51</td> <td>6.19</td> <td>11.01</td> <td>6.26</td> <td>5.62</td> <td>6.26</td> <td>8.55</td> <td>18.35</td> <td>16.68</td> <td>18.87</td> <td>7.01</td> <td>11.23</td> <td>14.02</td> </tr> <tr> <td>Score</td> <td>0.20</td> <td>0.50</td> <td>0.50</td> <td>-0.07</td> <td>0.50</td> <td>-0.09</td> <td>0.75</td> <td>0.50</td> <td>0.75</td> <td>0.75</td> <td>1.50</td> <td>0.75</td> <td>1.50</td> <td>1.50</td> <td>1.50</td> <td>-0.06</td> <td>1.50</td> <td>-0.06</td> <td>0.50</td> <td>1.50</td> <td>1.50</td> <td>1.50</td> <td>0.50</td> <td>1.50</td> <td>1.50</td> </tr> <tr> <td>Ion-type</td> <td>PR</td> <td>KQ</td> <td>a1</td> <td></td> <td>y1-NH3</td> <td></td> <td>OE</td> <td>a2</td> <td>AO</td> <td>b2</td> <td>EE</td> <td>y2</td> <td>GEE</td> <td>y5*2</td> <td>y3</td> <td></td> <td>y6*2</td> <td></td> <td>bg</td> <td>y4</td> <td></td> <td>y11*2</td> <td>y5</td> <td>y6-NH3</td> <td>y6</td> </tr> <tr> <td>Delta ppm</td> <td>8.2</td> <td>-11.6</td> <td>3.2</td> <td></td> <td>-22.2</td> <td></td> <td>8.4</td> <td>4.1</td> <td>-15.3</td> <td>-4.4</td> <td>-16.1</td> <td>10.1</td> <td>5.0</td> <td>7.9</td> <td></td> <td></td> <td>-18.5</td> <td></td> <td>-9.9</td> <td>-15.3</td> <td></td> <td>10.6</td> <td>-11.3</td> <td>9.9</td> <td>4.7</td> </tr> <tr> <td></td> <td></td> <td></td> <td>LI</td> <td>16.0</td> <td></td> </tr> </tbody> </table> |        |         |        |                  |                |                    |                                 |                            |                             |                    |         |             |                   |                                             | Fragment-ion (m/z) | 70.066  | 84.080    | 86.098    | 87.102  | 158.089 | 159.070   | 187.074 | 199.182 | 200.101 | 227.176 | 259.089 | 303.181 | 316.117 | 394.228*2 | 432.207 | 476.244 | 550.304*2 | 650.850*2 | 655.361 | 674.348 | 707.875*2 | 787.433 | 898.483 | 915.505 | 986.524 | Frac. Inten.(% of TIC) | 0.00 | 0.12 | 28.13 | 2.00 | 1.99 | 2.65 | 6.38 | 9.14 | 2.91 | 1.57 | 2.08 | 4.35 | 2.11 | 1.74 | 3.10 | 1.76 | 1.58 | 1.76 | 2.41 | 5.16 | 4.69 | 5.31 | 1.97 | 3.16 | 3.94 | Rel. Inten.(% of BP) | 0.01 | 0.44 | 100.00 | 7.11 | 7.06 | 9.44 | 22.69 | 32.48 | 10.36 | 5.57 | 7.39 | 15.45 | 7.51 | 6.19 | 11.01 | 6.26 | 5.62 | 6.26 | 8.55 | 18.35 | 16.68 | 18.87 | 7.01 | 11.23 | 14.02 | Score | 0.20 | 0.50 | 0.50 | -0.07 | 0.50 | -0.09 | 0.75 | 0.50 | 0.75 | 0.75 | 1.50 | 0.75 | 1.50 | 1.50 | 1.50 | -0.06 | 1.50 | -0.06 | 0.50 | 1.50 | 1.50 | 1.50 | 0.50 | 1.50 | 1.50 | Ion-type | PR | KQ | a1 |  | y1-NH3 |  | OE | a2 | AO | b2 | EE | y2 | GEE | y5*2 | y3 |  | y6*2 |  | bg | y4 |  | y11*2 | y5 | y6-NH3 | y6 | Delta ppm | 8.2 | -11.6 | 3.2 |  | -22.2 |  | 8.4 | 4.1 | -15.3 | -4.4 | -16.1 | 10.1 | 5.0 | 7.9 |  |  | -18.5 |  | -9.9 | -15.3 |  | 10.6 | -11.3 | 9.9 | 4.7 |  |  |  | LI | 16.0 |  |  |  |  |  |  |  |  |  |  |  |  |  |  |  |  |  |  |  |  |  |
| Fragment-ion (m/z)                                                                                                                                                                                                                                                                                                                                                                                                                                                                                                                                                                                                                                                                                                                                                                                                                                                                                                                                                                                                                                                                                                                                                                                                                                                                                                                                                                                                                                                                                                                                                                                                                                                                                                                                                                                                                                                                                                                                                                                                                                                                                                                                                                                                                                                                                                                                                                                                                                                                                                                                                                                                                                                                                                                                                                | 70.066 | 84.080  | 86.098 | 87.102           | 158.089        | 159.070            | 187.074                         | 199.182                    | 200.101                     | 227.176            | 259.089 | 303.181     | 316.117           | 394.228*2                                   | 432.207            | 476.244 | 550.304*2 | 650.850*2 | 655.361 | 674.348 | 707.875*2 | 787.433 | 898.483 | 915.505 | 986.524 |         |         |         |           |         |         |           |           |         |         |           |         |         |         |         |                        |      |      |       |      |      |      |      |      |      |      |      |      |      |      |      |      |      |      |      |      |      |      |      |      |      |                      |      |      |        |      |      |      |       |       |       |      |      |       |      |      |       |      |      |      |      |       |       |       |      |       |       |       |      |      |      |       |      |       |      |      |      |      |      |      |      |      |      |       |      |       |      |      |      |      |      |      |      |          |    |    |    |  |        |  |    |    |    |    |    |    |     |      |    |  |      |  |    |    |  |       |    |        |    |           |     |       |     |  |       |  |     |     |       |      |       |      |     |     |  |  |       |  |      |       |  |      |       |     |     |  |  |  |    |      |  |  |  |  |  |  |  |  |  |  |  |  |  |  |  |  |  |  |  |  |  |
| Frac. Inten.(% of TIC)                                                                                                                                                                                                                                                                                                                                                                                                                                                                                                                                                                                                                                                                                                                                                                                                                                                                                                                                                                                                                                                                                                                                                                                                                                                                                                                                                                                                                                                                                                                                                                                                                                                                                                                                                                                                                                                                                                                                                                                                                                                                                                                                                                                                                                                                                                                                                                                                                                                                                                                                                                                                                                                                                                                                                            | 0.00   | 0.12    | 28.13  | 2.00             | 1.99           | 2.65               | 6.38                            | 9.14                       | 2.91                        | 1.57               | 2.08    | 4.35        | 2.11              | 1.74                                        | 3.10               | 1.76    | 1.58      | 1.76      | 2.41    | 5.16    | 4.69      | 5.31    | 1.97    | 3.16    | 3.94    |         |         |         |           |         |         |           |           |         |         |           |         |         |         |         |                        |      |      |       |      |      |      |      |      |      |      |      |      |      |      |      |      |      |      |      |      |      |      |      |      |      |                      |      |      |        |      |      |      |       |       |       |      |      |       |      |      |       |      |      |      |      |       |       |       |      |       |       |       |      |      |      |       |      |       |      |      |      |      |      |      |      |      |      |       |      |       |      |      |      |      |      |      |      |          |    |    |    |  |        |  |    |    |    |    |    |    |     |      |    |  |      |  |    |    |  |       |    |        |    |           |     |       |     |  |       |  |     |     |       |      |       |      |     |     |  |  |       |  |      |       |  |      |       |     |     |  |  |  |    |      |  |  |  |  |  |  |  |  |  |  |  |  |  |  |  |  |  |  |  |  |  |
| Rel. Inten.(% of BP)                                                                                                                                                                                                                                                                                                                                                                                                                                                                                                                                                                                                                                                                                                                                                                                                                                                                                                                                                                                                                                                                                                                                                                                                                                                                                                                                                                                                                                                                                                                                                                                                                                                                                                                                                                                                                                                                                                                                                                                                                                                                                                                                                                                                                                                                                                                                                                                                                                                                                                                                                                                                                                                                                                                                                              | 0.01   | 0.44    | 100.00 | 7.11             | 7.06           | 9.44               | 22.69                           | 32.48                      | 10.36                       | 5.57               | 7.39    | 15.45       | 7.51              | 6.19                                        | 11.01              | 6.26    | 5.62      | 6.26      | 8.55    | 18.35   | 16.68     | 18.87   | 7.01    | 11.23   | 14.02   |         |         |         |           |         |         |           |           |         |         |           |         |         |         |         |                        |      |      |       |      |      |      |      |      |      |      |      |      |      |      |      |      |      |      |      |      |      |      |      |      |      |                      |      |      |        |      |      |      |       |       |       |      |      |       |      |      |       |      |      |      |      |       |       |       |      |       |       |       |      |      |      |       |      |       |      |      |      |      |      |      |      |      |      |       |      |       |      |      |      |      |      |      |      |          |    |    |    |  |        |  |    |    |    |    |    |    |     |      |    |  |      |  |    |    |  |       |    |        |    |           |     |       |     |  |       |  |     |     |       |      |       |      |     |     |  |  |       |  |      |       |  |      |       |     |     |  |  |  |    |      |  |  |  |  |  |  |  |  |  |  |  |  |  |  |  |  |  |  |  |  |  |
| Score                                                                                                                                                                                                                                                                                                                                                                                                                                                                                                                                                                                                                                                                                                                                                                                                                                                                                                                                                                                                                                                                                                                                                                                                                                                                                                                                                                                                                                                                                                                                                                                                                                                                                                                                                                                                                                                                                                                                                                                                                                                                                                                                                                                                                                                                                                                                                                                                                                                                                                                                                                                                                                                                                                                                                                             | 0.20   | 0.50    | 0.50   | -0.07            | 0.50           | -0.09              | 0.75                            | 0.50                       | 0.75                        | 0.75               | 1.50    | 0.75        | 1.50              | 1.50                                        | 1.50               | -0.06   | 1.50      | -0.06     | 0.50    | 1.50    | 1.50      | 1.50    | 0.50    | 1.50    | 1.50    |         |         |         |           |         |         |           |           |         |         |           |         |         |         |         |                        |      |      |       |      |      |      |      |      |      |      |      |      |      |      |      |      |      |      |      |      |      |      |      |      |      |                      |      |      |        |      |      |      |       |       |       |      |      |       |      |      |       |      |      |      |      |       |       |       |      |       |       |       |      |      |      |       |      |       |      |      |      |      |      |      |      |      |      |       |      |       |      |      |      |      |      |      |      |          |    |    |    |  |        |  |    |    |    |    |    |    |     |      |    |  |      |  |    |    |  |       |    |        |    |           |     |       |     |  |       |  |     |     |       |      |       |      |     |     |  |  |       |  |      |       |  |      |       |     |     |  |  |  |    |      |  |  |  |  |  |  |  |  |  |  |  |  |  |  |  |  |  |  |  |  |  |
| Ion-type                                                                                                                                                                                                                                                                                                                                                                                                                                                                                                                                                                                                                                                                                                                                                                                                                                                                                                                                                                                                                                                                                                                                                                                                                                                                                                                                                                                                                                                                                                                                                                                                                                                                                                                                                                                                                                                                                                                                                                                                                                                                                                                                                                                                                                                                                                                                                                                                                                                                                                                                                                                                                                                                                                                                                                          | PR     | KQ      | a1     |                  | y1-NH3         |                    | OE                              | a2                         | AO                          | b2                 | EE      | y2          | GEE               | y5*2                                        | y3                 |         | y6*2      |           | bg      | y4      |           | y11*2   | y5      | y6-NH3  | y6      |         |         |         |           |         |         |           |           |         |         |           |         |         |         |         |                        |      |      |       |      |      |      |      |      |      |      |      |      |      |      |      |      |      |      |      |      |      |      |      |      |      |                      |      |      |        |      |      |      |       |       |       |      |      |       |      |      |       |      |      |      |      |       |       |       |      |       |       |       |      |      |      |       |      |       |      |      |      |      |      |      |      |      |      |       |      |       |      |      |      |      |      |      |      |          |    |    |    |  |        |  |    |    |    |    |    |    |     |      |    |  |      |  |    |    |  |       |    |        |    |           |     |       |     |  |       |  |     |     |       |      |       |      |     |     |  |  |       |  |      |       |  |      |       |     |     |  |  |  |    |      |  |  |  |  |  |  |  |  |  |  |  |  |  |  |  |  |  |  |  |  |  |
| Delta ppm                                                                                                                                                                                                                                                                                                                                                                                                                                                                                                                                                                                                                                                                                                                                                                                                                                                                                                                                                                                                                                                                                                                                                                                                                                                                                                                                                                                                                                                                                                                                                                                                                                                                                                                                                                                                                                                                                                                                                                                                                                                                                                                                                                                                                                                                                                                                                                                                                                                                                                                                                                                                                                                                                                                                                                         | 8.2    | -11.6   | 3.2    |                  | -22.2          |                    | 8.4                             | 4.1                        | -15.3                       | -4.4               | -16.1   | 10.1        | 5.0               | 7.9                                         |                    |         | -18.5     |           | -9.9    | -15.3   |           | 10.6    | -11.3   | 9.9     | 4.7     |         |         |         |           |         |         |           |           |         |         |           |         |         |         |         |                        |      |      |       |      |      |      |      |      |      |      |      |      |      |      |      |      |      |      |      |      |      |      |      |      |      |                      |      |      |        |      |      |      |       |       |       |      |      |       |      |      |       |      |      |      |      |       |       |       |      |       |       |       |      |      |      |       |      |       |      |      |      |      |      |      |      |      |      |       |      |       |      |      |      |      |      |      |      |          |    |    |    |  |        |  |    |    |    |    |    |    |     |      |    |  |      |  |    |    |  |       |    |        |    |           |     |       |     |  |       |  |     |     |       |      |       |      |     |     |  |  |       |  |      |       |  |      |       |     |     |  |  |  |    |      |  |  |  |  |  |  |  |  |  |  |  |  |  |  |  |  |  |  |  |  |  |
|                                                                                                                                                                                                                                                                                                                                                                                                                                                                                                                                                                                                                                                                                                                                                                                                                                                                                                                                                                                                                                                                                                                                                                                                                                                                                                                                                                                                                                                                                                                                                                                                                                                                                                                                                                                                                                                                                                                                                                                                                                                                                                                                                                                                                                                                                                                                                                                                                                                                                                                                                                                                                                                                                                                                                                                   |        |         | LI     | 16.0             |                |                    |                                 |                            |                             |                    |         |             |                   |                                             |                    |         |           |           |         |         |           |         |         |         |         |         |         |         |           |         |         |           |           |         |         |           |         |         |         |         |                        |      |      |       |      |      |      |      |      |      |      |      |      |      |      |      |      |      |      |      |      |      |      |      |      |      |                      |      |      |        |      |      |      |       |       |       |      |      |       |      |      |       |      |      |      |      |       |       |       |      |       |       |       |      |      |      |       |      |       |      |      |      |      |      |      |      |      |      |       |      |       |      |      |      |      |      |      |      |          |    |    |    |  |        |  |    |    |    |    |    |    |     |      |    |  |      |  |    |    |  |       |    |        |    |           |     |       |     |  |       |  |     |     |       |      |       |      |     |     |  |  |       |  |      |       |  |      |       |     |     |  |  |  |    |      |  |  |  |  |  |  |  |  |  |  |  |  |  |  |  |  |  |  |  |  |  |

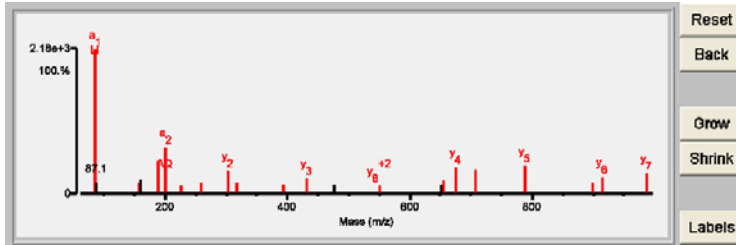

Reset  
Back  
Grow  
Shrink  
Labels

Result Summary

| Rank | Score | SPI (%) | BCS | # Unmatched Ions | Variable sites | Sequence                        | MH <sup>+</sup> Calculated (Da) | MH <sup>+</sup> Error (Da) | MH <sup>+</sup> Error (ppm) | Protein MW/pl (Da) | Species | Accession # | Protein Name                                                              |
|------|-------|---------|-----|------------------|----------------|---------------------------------|---------------------------------|----------------------------|-----------------------------|--------------------|---------|-------------|---------------------------------------------------------------------------|
| 1    | 15.38 | 80.1    | 7   | 5/25             | K195k          | (R) <u>LGHGSPFLK</u> GITEQQK(E) | 1894.0181                       | 114.0588                   | 7.9                         | 82705.0/5.55       | HUMAN   | P13010      | ATP-dependent DNA helicase 2 subunit 2 OS=Homo sapiens GN=XRCC5 PE=1 SV=3 |

Detailed Results

| Rank                                                                                                                                                                                                                                                                                                                                                                                                                                                                                                                                                                                                                                                                                                                                                                                                                                                                                                                                                                                                                                                                                                                                                                                                                                                                                                                                                                                                                                                                                                                                                                                                                                                                                                                                                                                                                                                                                                                                                                                                                                                                                                                                                                                                                                                                                                                                                                                                                                                                                                                                                                                                                                                                                                                                                                                                                                                                                                                                                                                                                                                                                                                                                     | Score  | SPI (%) | BCS    | # Unmatched Ions | Variable sites | Sequence                                          | MH <sup>+</sup> Calculated (Da) | MH <sup>+</sup> Error (Da) | MH <sup>+</sup> Error (ppm) | Protein MW/pl (Da) | Species | Accession # | MS-Digest Index # | Protein Name                                                              |                       |         |         |         |                       |             |                       |         |         |         |         |         |         |         |         |                       |         |         |         |                       |         |                       |         |         |         |         |                        |      |      |       |      |      |      |      |      |      |      |      |      |      |      |      |      |      |      |      |      |      |      |      |      |      |                      |      |      |        |       |      |      |      |       |       |       |       |       |       |       |       |       |      |      |       |       |       |       |       |       |       |       |      |      |      |       |      |      |      |      |      |       |      |       |      |       |      |       |      |      |      |      |      |      |      |      |      |          |    |    |    |  |   |   |     |        |    |  |    |  |  |  |                  |  |    |     |                  |             |                   |    |         |    |        |           |      |      |       |  |       |      |       |      |       |  |      |  |  |  |      |  |      |     |      |      |      |     |     |     |     |  |  |  |    |  |  |  |  |  |  |  |  |  |  |  |  |  |  |  |  |  |  |  |  |  |    |  |  |  |      |  |  |  |  |  |  |  |  |  |  |  |  |  |  |  |  |  |  |  |  |  |     |
|----------------------------------------------------------------------------------------------------------------------------------------------------------------------------------------------------------------------------------------------------------------------------------------------------------------------------------------------------------------------------------------------------------------------------------------------------------------------------------------------------------------------------------------------------------------------------------------------------------------------------------------------------------------------------------------------------------------------------------------------------------------------------------------------------------------------------------------------------------------------------------------------------------------------------------------------------------------------------------------------------------------------------------------------------------------------------------------------------------------------------------------------------------------------------------------------------------------------------------------------------------------------------------------------------------------------------------------------------------------------------------------------------------------------------------------------------------------------------------------------------------------------------------------------------------------------------------------------------------------------------------------------------------------------------------------------------------------------------------------------------------------------------------------------------------------------------------------------------------------------------------------------------------------------------------------------------------------------------------------------------------------------------------------------------------------------------------------------------------------------------------------------------------------------------------------------------------------------------------------------------------------------------------------------------------------------------------------------------------------------------------------------------------------------------------------------------------------------------------------------------------------------------------------------------------------------------------------------------------------------------------------------------------------------------------------------------------------------------------------------------------------------------------------------------------------------------------------------------------------------------------------------------------------------------------------------------------------------------------------------------------------------------------------------------------------------------------------------------------------------------------------------------------|--------|---------|--------|------------------|----------------|---------------------------------------------------|---------------------------------|----------------------------|-----------------------------|--------------------|---------|-------------|-------------------|---------------------------------------------------------------------------|-----------------------|---------|---------|---------|-----------------------|-------------|-----------------------|---------|---------|---------|---------|---------|---------|---------|---------|-----------------------|---------|---------|---------|-----------------------|---------|-----------------------|---------|---------|---------|---------|------------------------|------|------|-------|------|------|------|------|------|------|------|------|------|------|------|------|------|------|------|------|------|------|------|------|------|------|----------------------|------|------|--------|-------|------|------|------|-------|-------|-------|-------|-------|-------|-------|-------|-------|------|------|-------|-------|-------|-------|-------|-------|-------|-------|------|------|------|-------|------|------|------|------|------|-------|------|-------|------|-------|------|-------|------|------|------|------|------|------|------|------|------|----------|----|----|----|--|---|---|-----|--------|----|--|----|--|--|--|------------------|--|----|-----|------------------|-------------|-------------------|----|---------|----|--------|-----------|------|------|-------|--|-------|------|-------|------|-------|--|------|--|--|--|------|--|------|-----|------|------|------|-----|-----|-----|-----|--|--|--|----|--|--|--|--|--|--|--|--|--|--|--|--|--|--|--|--|--|--|--|--|--|----|--|--|--|------|--|--|--|--|--|--|--|--|--|--|--|--|--|--|--|--|--|--|--|--|--|-----|
| 1                                                                                                                                                                                                                                                                                                                                                                                                                                                                                                                                                                                                                                                                                                                                                                                                                                                                                                                                                                                                                                                                                                                                                                                                                                                                                                                                                                                                                                                                                                                                                                                                                                                                                                                                                                                                                                                                                                                                                                                                                                                                                                                                                                                                                                                                                                                                                                                                                                                                                                                                                                                                                                                                                                                                                                                                                                                                                                                                                                                                                                                                                                                                                        | 15.38  | 80.1    | 7      | 5/25             | K195k          | (R) L G G H G P S F L K / G I / T E / Q Q / K (E) | 1894.0181                       | 114.0588                   | 7.9                         | 82705.0/5.55       | HUMAN   | P13010      | 347305            | ATP-dependent DNA helicase 2 subunit 2 OS=Homo sapiens GN=XRCC5 PE=1 SV=3 |                       |         |         |         |                       |             |                       |         |         |         |         |         |         |         |         |                       |         |         |         |                       |         |                       |         |         |         |         |                        |      |      |       |      |      |      |      |      |      |      |      |      |      |      |      |      |      |      |      |      |      |      |      |      |      |                      |      |      |        |       |      |      |      |       |       |       |       |       |       |       |       |       |      |      |       |       |       |       |       |       |       |       |      |      |      |       |      |      |      |      |      |       |      |       |      |       |      |       |      |      |      |      |      |      |      |      |      |          |    |    |    |  |   |   |     |        |    |  |    |  |  |  |                  |  |    |     |                  |             |                   |    |         |    |        |           |      |      |       |  |       |      |       |      |       |  |      |  |  |  |      |  |      |     |      |      |      |     |     |     |     |  |  |  |    |  |  |  |  |  |  |  |  |  |  |  |  |  |  |  |  |  |  |  |  |  |    |  |  |  |      |  |  |  |  |  |  |  |  |  |  |  |  |  |  |  |  |  |  |  |  |  |     |
| <table border="1"> <thead> <tr> <th>Fragment-ion (m/z)</th> <th>70.065</th> <th>84.080</th> <th>86.096</th> <th>87.054</th> <th>110.069</th> <th>120.080</th> <th>129.101</th> <th>130.090</th> <th>147.109</th> <th>183.149</th> <th>195.088</th> <th>257.158</th> <th>258.147</th> <th>354.182</th> <th>363.187<sup>+2</sup></th> <th>385.230</th> <th>422.212</th> <th>453.284</th> <th>523.298<sup>+2</sup></th> <th>622.286</th> <th>628.353<sup>+2</sup></th> <th>633.321</th> <th>640.287</th> <th>753.372</th> <th>803.427</th> </tr> </thead> <tbody> <tr> <td>Frac. Inten.(% of TIC)</td> <td>0.02</td> <td>0.81</td> <td>25.96</td> <td>3.11</td> <td>0.17</td> <td>0.46</td> <td>0.20</td> <td>2.74</td> <td>2.74</td> <td>4.57</td> <td>2.71</td> <td>3.24</td> <td>2.85</td> <td>3.47</td> <td>4.09</td> <td>5.47</td> <td>2.52</td> <td>2.52</td> <td>4.61</td> <td>3.78</td> <td>6.76</td> <td>5.17</td> <td>3.32</td> <td>3.58</td> <td>5.14</td> </tr> <tr> <td>Rel. Inten.(% of BP)</td> <td>0.07</td> <td>3.12</td> <td>100.00</td> <td>12.00</td> <td>0.65</td> <td>1.78</td> <td>0.76</td> <td>10.55</td> <td>10.54</td> <td>17.59</td> <td>10.44</td> <td>12.48</td> <td>10.98</td> <td>13.36</td> <td>15.75</td> <td>21.09</td> <td>9.72</td> <td>9.71</td> <td>17.78</td> <td>14.57</td> <td>26.03</td> <td>19.91</td> <td>12.80</td> <td>13.79</td> <td>19.81</td> </tr> <tr> <td>Score</td> <td>0.20</td> <td>0.50</td> <td>0.50</td> <td>-0.12</td> <td>1.00</td> <td>1.00</td> <td>0.20</td> <td>0.50</td> <td>1.50</td> <td>-0.18</td> <td>0.75</td> <td>-0.12</td> <td>0.50</td> <td>-0.13</td> <td>0.50</td> <td>-0.21</td> <td>0.50</td> <td>0.75</td> <td>1.50</td> <td>0.50</td> <td>1.50</td> <td>1.50</td> <td>0.75</td> <td>0.50</td> <td>1.50</td> </tr> <tr> <td>Ion-type</td> <td>PR</td> <td>KQ</td> <td>a1</td> <td></td> <td>H</td> <td>F</td> <td>RKQ</td> <td>y1-NH3</td> <td>y1</td> <td></td> <td>HG</td> <td></td> <td></td> <td></td> <td>a8<sup>+2</sup></td> <td></td> <td>b5</td> <td>PLK</td> <td>y6<sup>+2</sup></td> <td>GGHGSPF-H2O</td> <td>y10<sup>+2</sup></td> <td>y5</td> <td>GGHGSPF</td> <td>b8</td> <td>b+++15</td> </tr> <tr> <td>Delta ppm</td> <td>-3.2</td> <td>-4.5</td> <td>-17.7</td> <td></td> <td>-17.0</td> <td>-9.8</td> <td>-10.4</td> <td>30.3</td> <td>-28.6</td> <td></td> <td>-5.9</td> <td></td> <td></td> <td></td> <td>-9.8</td> <td></td> <td>-9.8</td> <td>1.3</td> <td>23.8</td> <td>18.8</td> <td>-1.6</td> <td>1.4</td> <td>3.0</td> <td>4.2</td> <td>4.6</td> </tr> <tr> <td></td> <td></td> <td></td> <td>LI</td> <td></td> <td>y7</td> </tr> <tr> <td></td> <td></td> <td></td> <td>-4.9</td> <td></td> <td>1.7</td> </tr> </tbody> </table> |        |         |        |                  |                |                                                   |                                 |                            |                             |                    |         |             |                   |                                                                           | Fragment-ion (m/z)    | 70.065  | 84.080  | 86.096  | 87.054                | 110.069     | 120.080               | 129.101 | 130.090 | 147.109 | 183.149 | 195.088 | 257.158 | 258.147 | 354.182 | 363.187 <sup>+2</sup> | 385.230 | 422.212 | 453.284 | 523.298 <sup>+2</sup> | 622.286 | 628.353 <sup>+2</sup> | 633.321 | 640.287 | 753.372 | 803.427 | Frac. Inten.(% of TIC) | 0.02 | 0.81 | 25.96 | 3.11 | 0.17 | 0.46 | 0.20 | 2.74 | 2.74 | 4.57 | 2.71 | 3.24 | 2.85 | 3.47 | 4.09 | 5.47 | 2.52 | 2.52 | 4.61 | 3.78 | 6.76 | 5.17 | 3.32 | 3.58 | 5.14 | Rel. Inten.(% of BP) | 0.07 | 3.12 | 100.00 | 12.00 | 0.65 | 1.78 | 0.76 | 10.55 | 10.54 | 17.59 | 10.44 | 12.48 | 10.98 | 13.36 | 15.75 | 21.09 | 9.72 | 9.71 | 17.78 | 14.57 | 26.03 | 19.91 | 12.80 | 13.79 | 19.81 | Score | 0.20 | 0.50 | 0.50 | -0.12 | 1.00 | 1.00 | 0.20 | 0.50 | 1.50 | -0.18 | 0.75 | -0.12 | 0.50 | -0.13 | 0.50 | -0.21 | 0.50 | 0.75 | 1.50 | 0.50 | 1.50 | 1.50 | 0.75 | 0.50 | 1.50 | Ion-type | PR | KQ | a1 |  | H | F | RKQ | y1-NH3 | y1 |  | HG |  |  |  | a8 <sup>+2</sup> |  | b5 | PLK | y6 <sup>+2</sup> | GGHGSPF-H2O | y10 <sup>+2</sup> | y5 | GGHGSPF | b8 | b+++15 | Delta ppm | -3.2 | -4.5 | -17.7 |  | -17.0 | -9.8 | -10.4 | 30.3 | -28.6 |  | -5.9 |  |  |  | -9.8 |  | -9.8 | 1.3 | 23.8 | 18.8 | -1.6 | 1.4 | 3.0 | 4.2 | 4.6 |  |  |  | LI |  |  |  |  |  |  |  |  |  |  |  |  |  |  |  |  |  |  |  |  |  | y7 |  |  |  | -4.9 |  |  |  |  |  |  |  |  |  |  |  |  |  |  |  |  |  |  |  |  |  | 1.7 |
| Fragment-ion (m/z)                                                                                                                                                                                                                                                                                                                                                                                                                                                                                                                                                                                                                                                                                                                                                                                                                                                                                                                                                                                                                                                                                                                                                                                                                                                                                                                                                                                                                                                                                                                                                                                                                                                                                                                                                                                                                                                                                                                                                                                                                                                                                                                                                                                                                                                                                                                                                                                                                                                                                                                                                                                                                                                                                                                                                                                                                                                                                                                                                                                                                                                                                                                                       | 70.065 | 84.080  | 86.096 | 87.054           | 110.069        | 120.080                                           | 129.101                         | 130.090                    | 147.109                     | 183.149            | 195.088 | 257.158     | 258.147           | 354.182                                                                   | 363.187 <sup>+2</sup> | 385.230 | 422.212 | 453.284 | 523.298 <sup>+2</sup> | 622.286     | 628.353 <sup>+2</sup> | 633.321 | 640.287 | 753.372 | 803.427 |         |         |         |         |                       |         |         |         |                       |         |                       |         |         |         |         |                        |      |      |       |      |      |      |      |      |      |      |      |      |      |      |      |      |      |      |      |      |      |      |      |      |      |                      |      |      |        |       |      |      |      |       |       |       |       |       |       |       |       |       |      |      |       |       |       |       |       |       |       |       |      |      |      |       |      |      |      |      |      |       |      |       |      |       |      |       |      |      |      |      |      |      |      |      |      |          |    |    |    |  |   |   |     |        |    |  |    |  |  |  |                  |  |    |     |                  |             |                   |    |         |    |        |           |      |      |       |  |       |      |       |      |       |  |      |  |  |  |      |  |      |     |      |      |      |     |     |     |     |  |  |  |    |  |  |  |  |  |  |  |  |  |  |  |  |  |  |  |  |  |  |  |  |  |    |  |  |  |      |  |  |  |  |  |  |  |  |  |  |  |  |  |  |  |  |  |  |  |  |  |     |
| Frac. Inten.(% of TIC)                                                                                                                                                                                                                                                                                                                                                                                                                                                                                                                                                                                                                                                                                                                                                                                                                                                                                                                                                                                                                                                                                                                                                                                                                                                                                                                                                                                                                                                                                                                                                                                                                                                                                                                                                                                                                                                                                                                                                                                                                                                                                                                                                                                                                                                                                                                                                                                                                                                                                                                                                                                                                                                                                                                                                                                                                                                                                                                                                                                                                                                                                                                                   | 0.02   | 0.81    | 25.96  | 3.11             | 0.17           | 0.46                                              | 0.20                            | 2.74                       | 2.74                        | 4.57               | 2.71    | 3.24        | 2.85              | 3.47                                                                      | 4.09                  | 5.47    | 2.52    | 2.52    | 4.61                  | 3.78        | 6.76                  | 5.17    | 3.32    | 3.58    | 5.14    |         |         |         |         |                       |         |         |         |                       |         |                       |         |         |         |         |                        |      |      |       |      |      |      |      |      |      |      |      |      |      |      |      |      |      |      |      |      |      |      |      |      |      |                      |      |      |        |       |      |      |      |       |       |       |       |       |       |       |       |       |      |      |       |       |       |       |       |       |       |       |      |      |      |       |      |      |      |      |      |       |      |       |      |       |      |       |      |      |      |      |      |      |      |      |      |          |    |    |    |  |   |   |     |        |    |  |    |  |  |  |                  |  |    |     |                  |             |                   |    |         |    |        |           |      |      |       |  |       |      |       |      |       |  |      |  |  |  |      |  |      |     |      |      |      |     |     |     |     |  |  |  |    |  |  |  |  |  |  |  |  |  |  |  |  |  |  |  |  |  |  |  |  |  |    |  |  |  |      |  |  |  |  |  |  |  |  |  |  |  |  |  |  |  |  |  |  |  |  |  |     |
| Rel. Inten.(% of BP)                                                                                                                                                                                                                                                                                                                                                                                                                                                                                                                                                                                                                                                                                                                                                                                                                                                                                                                                                                                                                                                                                                                                                                                                                                                                                                                                                                                                                                                                                                                                                                                                                                                                                                                                                                                                                                                                                                                                                                                                                                                                                                                                                                                                                                                                                                                                                                                                                                                                                                                                                                                                                                                                                                                                                                                                                                                                                                                                                                                                                                                                                                                                     | 0.07   | 3.12    | 100.00 | 12.00            | 0.65           | 1.78                                              | 0.76                            | 10.55                      | 10.54                       | 17.59              | 10.44   | 12.48       | 10.98             | 13.36                                                                     | 15.75                 | 21.09   | 9.72    | 9.71    | 17.78                 | 14.57       | 26.03                 | 19.91   | 12.80   | 13.79   | 19.81   |         |         |         |         |                       |         |         |         |                       |         |                       |         |         |         |         |                        |      |      |       |      |      |      |      |      |      |      |      |      |      |      |      |      |      |      |      |      |      |      |      |      |      |                      |      |      |        |       |      |      |      |       |       |       |       |       |       |       |       |       |      |      |       |       |       |       |       |       |       |       |      |      |      |       |      |      |      |      |      |       |      |       |      |       |      |       |      |      |      |      |      |      |      |      |      |          |    |    |    |  |   |   |     |        |    |  |    |  |  |  |                  |  |    |     |                  |             |                   |    |         |    |        |           |      |      |       |  |       |      |       |      |       |  |      |  |  |  |      |  |      |     |      |      |      |     |     |     |     |  |  |  |    |  |  |  |  |  |  |  |  |  |  |  |  |  |  |  |  |  |  |  |  |  |    |  |  |  |      |  |  |  |  |  |  |  |  |  |  |  |  |  |  |  |  |  |  |  |  |  |     |
| Score                                                                                                                                                                                                                                                                                                                                                                                                                                                                                                                                                                                                                                                                                                                                                                                                                                                                                                                                                                                                                                                                                                                                                                                                                                                                                                                                                                                                                                                                                                                                                                                                                                                                                                                                                                                                                                                                                                                                                                                                                                                                                                                                                                                                                                                                                                                                                                                                                                                                                                                                                                                                                                                                                                                                                                                                                                                                                                                                                                                                                                                                                                                                                    | 0.20   | 0.50    | 0.50   | -0.12            | 1.00           | 1.00                                              | 0.20                            | 0.50                       | 1.50                        | -0.18              | 0.75    | -0.12       | 0.50              | -0.13                                                                     | 0.50                  | -0.21   | 0.50    | 0.75    | 1.50                  | 0.50        | 1.50                  | 1.50    | 0.75    | 0.50    | 1.50    |         |         |         |         |                       |         |         |         |                       |         |                       |         |         |         |         |                        |      |      |       |      |      |      |      |      |      |      |      |      |      |      |      |      |      |      |      |      |      |      |      |      |      |                      |      |      |        |       |      |      |      |       |       |       |       |       |       |       |       |       |      |      |       |       |       |       |       |       |       |       |      |      |      |       |      |      |      |      |      |       |      |       |      |       |      |       |      |      |      |      |      |      |      |      |      |          |    |    |    |  |   |   |     |        |    |  |    |  |  |  |                  |  |    |     |                  |             |                   |    |         |    |        |           |      |      |       |  |       |      |       |      |       |  |      |  |  |  |      |  |      |     |      |      |      |     |     |     |     |  |  |  |    |  |  |  |  |  |  |  |  |  |  |  |  |  |  |  |  |  |  |  |  |  |    |  |  |  |      |  |  |  |  |  |  |  |  |  |  |  |  |  |  |  |  |  |  |  |  |  |     |
| Ion-type                                                                                                                                                                                                                                                                                                                                                                                                                                                                                                                                                                                                                                                                                                                                                                                                                                                                                                                                                                                                                                                                                                                                                                                                                                                                                                                                                                                                                                                                                                                                                                                                                                                                                                                                                                                                                                                                                                                                                                                                                                                                                                                                                                                                                                                                                                                                                                                                                                                                                                                                                                                                                                                                                                                                                                                                                                                                                                                                                                                                                                                                                                                                                 | PR     | KQ      | a1     |                  | H              | F                                                 | RKQ                             | y1-NH3                     | y1                          |                    | HG      |             |                   |                                                                           | a8 <sup>+2</sup>      |         | b5      | PLK     | y6 <sup>+2</sup>      | GGHGSPF-H2O | y10 <sup>+2</sup>     | y5      | GGHGSPF | b8      | b+++15  |         |         |         |         |                       |         |         |         |                       |         |                       |         |         |         |         |                        |      |      |       |      |      |      |      |      |      |      |      |      |      |      |      |      |      |      |      |      |      |      |      |      |      |                      |      |      |        |       |      |      |      |       |       |       |       |       |       |       |       |       |      |      |       |       |       |       |       |       |       |       |      |      |      |       |      |      |      |      |      |       |      |       |      |       |      |       |      |      |      |      |      |      |      |      |      |          |    |    |    |  |   |   |     |        |    |  |    |  |  |  |                  |  |    |     |                  |             |                   |    |         |    |        |           |      |      |       |  |       |      |       |      |       |  |      |  |  |  |      |  |      |     |      |      |      |     |     |     |     |  |  |  |    |  |  |  |  |  |  |  |  |  |  |  |  |  |  |  |  |  |  |  |  |  |    |  |  |  |      |  |  |  |  |  |  |  |  |  |  |  |  |  |  |  |  |  |  |  |  |  |     |
| Delta ppm                                                                                                                                                                                                                                                                                                                                                                                                                                                                                                                                                                                                                                                                                                                                                                                                                                                                                                                                                                                                                                                                                                                                                                                                                                                                                                                                                                                                                                                                                                                                                                                                                                                                                                                                                                                                                                                                                                                                                                                                                                                                                                                                                                                                                                                                                                                                                                                                                                                                                                                                                                                                                                                                                                                                                                                                                                                                                                                                                                                                                                                                                                                                                | -3.2   | -4.5    | -17.7  |                  | -17.0          | -9.8                                              | -10.4                           | 30.3                       | -28.6                       |                    | -5.9    |             |                   |                                                                           | -9.8                  |         | -9.8    | 1.3     | 23.8                  | 18.8        | -1.6                  | 1.4     | 3.0     | 4.2     | 4.6     |         |         |         |         |                       |         |         |         |                       |         |                       |         |         |         |         |                        |      |      |       |      |      |      |      |      |      |      |      |      |      |      |      |      |      |      |      |      |      |      |      |      |      |                      |      |      |        |       |      |      |      |       |       |       |       |       |       |       |       |       |      |      |       |       |       |       |       |       |       |       |      |      |      |       |      |      |      |      |      |       |      |       |      |       |      |       |      |      |      |      |      |      |      |      |      |          |    |    |    |  |   |   |     |        |    |  |    |  |  |  |                  |  |    |     |                  |             |                   |    |         |    |        |           |      |      |       |  |       |      |       |      |       |  |      |  |  |  |      |  |      |     |      |      |      |     |     |     |     |  |  |  |    |  |  |  |  |  |  |  |  |  |  |  |  |  |  |  |  |  |  |  |  |  |    |  |  |  |      |  |  |  |  |  |  |  |  |  |  |  |  |  |  |  |  |  |  |  |  |  |     |
|                                                                                                                                                                                                                                                                                                                                                                                                                                                                                                                                                                                                                                                                                                                                                                                                                                                                                                                                                                                                                                                                                                                                                                                                                                                                                                                                                                                                                                                                                                                                                                                                                                                                                                                                                                                                                                                                                                                                                                                                                                                                                                                                                                                                                                                                                                                                                                                                                                                                                                                                                                                                                                                                                                                                                                                                                                                                                                                                                                                                                                                                                                                                                          |        |         | LI     |                  |                |                                                   |                                 |                            |                             |                    |         |             |                   |                                                                           |                       |         |         |         |                       |             |                       |         |         |         | y7      |         |         |         |         |                       |         |         |         |                       |         |                       |         |         |         |         |                        |      |      |       |      |      |      |      |      |      |      |      |      |      |      |      |      |      |      |      |      |      |      |      |      |      |                      |      |      |        |       |      |      |      |       |       |       |       |       |       |       |       |       |      |      |       |       |       |       |       |       |       |       |      |      |      |       |      |      |      |      |      |       |      |       |      |       |      |       |      |      |      |      |      |      |      |      |      |          |    |    |    |  |   |   |     |        |    |  |    |  |  |  |                  |  |    |     |                  |             |                   |    |         |    |        |           |      |      |       |  |       |      |       |      |       |  |      |  |  |  |      |  |      |     |      |      |      |     |     |     |     |  |  |  |    |  |  |  |  |  |  |  |  |  |  |  |  |  |  |  |  |  |  |  |  |  |    |  |  |  |      |  |  |  |  |  |  |  |  |  |  |  |  |  |  |  |  |  |  |  |  |  |     |
|                                                                                                                                                                                                                                                                                                                                                                                                                                                                                                                                                                                                                                                                                                                                                                                                                                                                                                                                                                                                                                                                                                                                                                                                                                                                                                                                                                                                                                                                                                                                                                                                                                                                                                                                                                                                                                                                                                                                                                                                                                                                                                                                                                                                                                                                                                                                                                                                                                                                                                                                                                                                                                                                                                                                                                                                                                                                                                                                                                                                                                                                                                                                                          |        |         | -4.9   |                  |                |                                                   |                                 |                            |                             |                    |         |             |                   |                                                                           |                       |         |         |         |                       |             |                       |         |         |         | 1.7     |         |         |         |         |                       |         |         |         |                       |         |                       |         |         |         |         |                        |      |      |       |      |      |      |      |      |      |      |      |      |      |      |      |      |      |      |      |      |      |      |      |      |      |                      |      |      |        |       |      |      |      |       |       |       |       |       |       |       |       |       |      |      |       |       |       |       |       |       |       |       |      |      |      |       |      |      |      |      |      |       |      |       |      |       |      |       |      |      |      |      |      |      |      |      |      |          |    |    |    |  |   |   |     |        |    |  |    |  |  |  |                  |  |    |     |                  |             |                   |    |         |    |        |           |      |      |       |  |       |      |       |      |       |  |      |  |  |  |      |  |      |     |      |      |      |     |     |     |     |  |  |  |    |  |  |  |  |  |  |  |  |  |  |  |  |  |  |  |  |  |  |  |  |  |    |  |  |  |      |  |  |  |  |  |  |  |  |  |  |  |  |  |  |  |  |  |  |  |  |  |     |

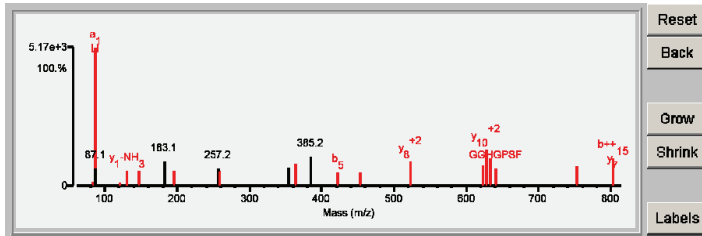

Result Summary

| Rank | Score | SPI (%) | BCS | # Unmatched Ions | Variable sites | Sequence                     | MH <sup>+</sup> Calculated (Da) | MH <sup>+</sup> Error (Da) | MH <sup>+</sup> Error (ppm) | Protein MW/pl (Da) | Species | Accession # | Protein Name                                                              |
|------|-------|---------|-----|------------------|----------------|------------------------------|---------------------------------|----------------------------|-----------------------------|--------------------|---------|-------------|---------------------------------------------------------------------------|
| 1    | 16.37 | 81.6    | 9   | 8/25             | K137k          | (R)LVTLISQQATLLASNEAFKK(Q)   | 2175.2383                       | 114.0586                   | 6.8                         | 27991.8/8.44       | HUMAN   | P51572      | B-cell receptor-associated protein 31 OS=Homo sapiens GN=BCAP31 PE=1 SV=3 |
| 2    | 14.71 | 79.8    | 8   | 9/25             | K138k          | (R)LVTLISQQATLLASNEAFKK(Q)   | 2175.2383                       | 114.0586                   | 6.8                         | 27991.8/8.44       | HUMAN   | P51572      | B-cell receptor-associated protein 31 OS=Homo sapiens GN=BCAP31 PE=1 SV=3 |
| 3    | 5.37  | 58.4    | 2   | 13/25            | None           | (K)LVLTLSRSRGIRTGYQAKQVRR(W) | 2289.3262                       | -0.0293                    | -12.8                       | 273401.0/5.99      | HUMAN   | P49327      | Fatty acid synthase OS=Homo sapiens GN=FASN PE=1 SV=2                     |
| 4    | 4.65  | 52.5    | 3   | 13/25            | None           | (R)SILLKTLCKLVDSLSLKL(L)     | 2289.3098                       | -0.0128                    | -5.6                        | 96867.1/8.53       | HUMAN   | Q8NEN0      | Armadillo repeat-containing protein 2 OS=Homo sapiens GN=ARMC2 PE=1 SV=4  |

Detailed Results

| Rank                   | Score  | SPI (%) | BCS    | # Unmatched Ions | Variable sites | Sequence                   | MH <sup>+</sup> Calculated (Da) | MH <sup>+</sup> Error (Da) | MH <sup>+</sup> Error (ppm) | Protein MW/pl (Da) | Species | Accession # | MS-Digest Index # | Protein Name                                                              |         |                       |                       |                       |                       |         |                       |          |          |          |          |     |
|------------------------|--------|---------|--------|------------------|----------------|----------------------------|---------------------------------|----------------------------|-----------------------------|--------------------|---------|-------------|-------------------|---------------------------------------------------------------------------|---------|-----------------------|-----------------------|-----------------------|-----------------------|---------|-----------------------|----------|----------|----------|----------|-----|
| 1                      | 16.37  | 81.6    | 9      | 8/25             | K137k          | (R)LVTLISQQATLLASNEAFKK(Q) | 2175.2383                       | 114.0586                   | 6.8                         | 27991.8/8.44       | HUMAN   | P51572      | 64683             | B-cell receptor-associated protein 31 OS=Homo sapiens GN=BCAP31 PE=1 SV=3 |         |                       |                       |                       |                       |         |                       |          |          |          |          |     |
| Fragment-ion (m/z)     | 70.065 | 72.079  | 86.095 | 136.072          | 147.109        | 173.124                    | 185.165                         | 187.142                    | 213.158                     | 215.137            | 296.195 | 314.207     | 389.170           | 723.326                                                                   | 850.449 | 875.463 <sup>+2</sup> | 903.430 <sup>+2</sup> | 903.683 <sup>+2</sup> | 931.999 <sup>+2</sup> | 937.477 | 988.521 <sup>+2</sup> | 1008.513 | 1039.074 | 1039.575 | 1121.585 |     |
| Frac. Inten.(% of TIC) | 0.11   | 0.12    | 11.28  | 2.74             | 1.86           | 2.88                       | 8.07                            | 3.49                       | 5.85                        | 3.80               | 2.69    | 5.94        | 2.19              | 1.93                                                                      | 2.18    | 5.81                  | 2.81                  | 2.67                  | 8.78                  | 4.80    | 2.95                  | 4.40     | 6.68     | 3.03     | 2.93     |     |
| Rel. Inten.(% of BP)   | 1.02   | 1.05    | 100.00 | 24.31            | 16.53          | 25.50                      | 71.51                           | 30.94                      | 51.88                       | 33.72              | 23.63   | 52.66       | 19.40             | 17.13                                                                     | 19.34   | 51.46                 | 24.90                 | 23.64                 | 77.79                 | 42.53   | 26.17                 | 38.97    | 59.22    | 26.90    | 25.95    |     |
| Score                  | -0.01  | 0.50    | 0.50   | -0.24            | 1.50           | -0.26                      | 0.50                            | 0.50                       | 0.75                        | 0.50               | 0.75    | 0.50        | 0.75              | -0.19                                                                     | 1.50    | 1.50                  | -0.25                 | -0.24                 | 1.50                  | 1.50    | 1.50                  | 1.50     | 1.50     | 1.50     | 1.50     |     |
| Ion-type               | V      | a1      | a1     | a1               | y1             | a2                         | b2                              | TL                         | b3-H2O                      | b3                 | y6      | y6          | y6                | y6                                                                        | y6      | y15                   | y15                   | y15                   | y16                   | y17     | y17                   | y17      | y17      | y17      | y17      | y17 |
| Delta ppm              |        | -19.1   | -29.3  | 0.50             | -26.5          | -5.1                       | -16.6                           | -13.8                      | -15.4                       | -11.0              | -5.2    | -5.2        | -5.2              | -5.2                                                                      | 8.5     | 3.3                   | 3.3                   | 3.3                   | -3.7                  | 3.4     | 3.4                   | 3.4      | 3.4      | 3.4      | 3.4      |     |

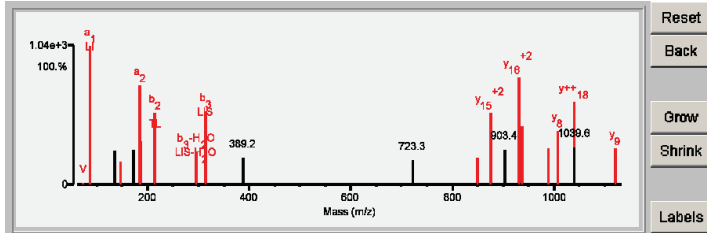



Result Summary

| Rank | Score | SPI (%) | BCS | # Unmatched Ions | Variable sites | Sequence                   | MH <sup>+</sup> Calculated (Da) | MH <sup>+</sup> Error (Da) | MH <sup>+</sup> Error (ppm) | Protein MW/pl (Da) | Species | Accession # | Protein Name                                                              |
|------|-------|---------|-----|------------------|----------------|----------------------------|---------------------------------|----------------------------|-----------------------------|--------------------|---------|-------------|---------------------------------------------------------------------------|
| 1    | 13.62 | 69.4    | 8   | 7/23             | K95k           | (K)YVNLQNNPGAMEHFHMKLFR(A) | 2283.1274                       | 114.0650                   | 9.2                         | 27991.8/8.44       | HUMAN   | P51572      | B-cell receptor-associated protein 31 OS=Homo sapiens GN=BCAP31 PE=1 SV=3 |

Detailed Results

| Rank | Score | SPI (%) | BCS | # Unmatched Ions | Variable sites | Sequence                   | MH <sup>+</sup> Calculated (Da) | MH <sup>+</sup> Error (Da) | MH <sup>+</sup> Error (ppm) | Protein MW/pl (Da) | Species | Accession # | MS-Digest Index # | Protein Name                                                              |
|------|-------|---------|-----|------------------|----------------|----------------------------|---------------------------------|----------------------------|-----------------------------|--------------------|---------|-------------|-------------------|---------------------------------------------------------------------------|
| 1    | 13.62 | 69.4    | 8   | 7/23             | K95k           | (K)YVNLQNNPGAMEHFHMKLFR(A) | 2283.1274                       | 114.0650                   | 9.2                         | 27991.8/8.44       | HUMAN   | P51572      | 32342             | B-cell receptor-associated protein 31 OS=Homo sapiens GN=BCAP31 PE=1 SV=3 |

| Fragment-ion (m/z)     | 70.028 | 70.065 | 72.081 | 84.044 | 84.080 | 86.097 | 87.055 | 104.051 | 110.071 | 120.080 | 156.078 | 175.119 | 214.116 | 215.119 | 257.134           | 320.183           | 327.204 | 435.276 | 449.467           | 572.278 <sup>+3</sup> | 809.414 <sup>+2</sup> | 945.513 | 1092.553 |
|------------------------|--------|--------|--------|--------|--------|--------|--------|---------|---------|---------|---------|---------|---------|---------|-------------------|-------------------|---------|---------|-------------------|-----------------------|-----------------------|---------|----------|
| Frac. Inten.(% of TIC) | 7.85   | 0.02   | 1.09   | 0.23   | 0.23   | 0.69   | 0.36   | 10.58   | 0.52    | 0.27    | 3.78    | 6.78    | 6.26    | 3.73    | 3.77              | 6.68              | 4.14    | 5.30    | 5.09              | 14.41                 | 8.23                  | 6.23    | 3.75     |
| Rel. Inten.(% of BP)   | 54.49  | 0.17   | 7.59   | 1.58   | 1.63   | 4.78   | 2.51   | 73.39   | 3.60    | 1.84    | 26.21   | 47.02   | 43.43   | 25.86   | 26.17             | 46.32             | 28.75   | 36.75   | 35.33             | 100.00                | 57.12                 | 43.21   | 26.04    |
| Score                  | -0.22  | 0.20   | 0.50   | 1.00   | 0.50   | 0.22   | 0.33   | -0.29   | 1.00    | 1.00    | -0.10   | 1.50    | 0.50    | -0.10   | -0.10             | -0.18             | 0.50    | 1.50    | -0.14             | 1.50                  | 1.50                  | 1.50    | 1.50     |
| Ion-type               | PR     | a1     | E      | KQ     | LI     | NR     | H      | F       | y1      | b2      | y1      | b2      | b3      | y3      | y13 <sup>+3</sup> | y12 <sup>+2</sup> | y6      | y7      | y13 <sup>+3</sup> | y12 <sup>+2</sup>     | y6                    | y7      | y7       |
| Delta ppm              |        | -4.6   | -13.5  | 0.1    | -14.0  | 0.9    | -2.2   |         | -4.3    | -6.5    |         | -0.9    | -18.8   |         |                   |                   | -0.2    | 10.7    |                   | -6.2                  | 26.7                  | 4.8     | -22.3    |
|                        |        |        | 0.50   |        |        |        |        |         |         |         |         |         |         |         |                   |                   |         |         |                   |                       |                       |         | 18.0     |
|                        |        |        | 1.7    |        |        |        |        |         |         |         |         |         |         |         |                   |                   |         |         |                   |                       |                       |         |          |

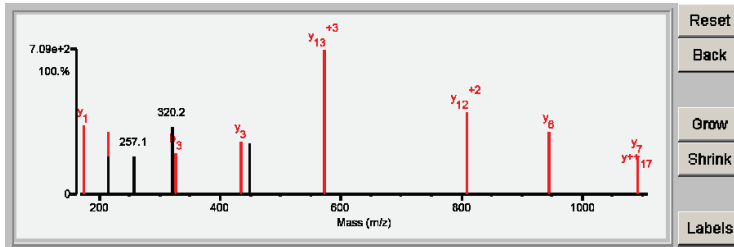

Reset

Back

Grow

Shrink

Labels

Result Summary

| Rank | Score | SPI (%) | BCS | # Unmatched Ions | Variable sites | Sequence                            | MH <sup>+</sup> Calculated (Da) | MH <sup>+</sup> Error (Da) | MH <sup>+</sup> Error (ppm) | Protein MW/pI (Da) | Species | Accession # | Protein Name                                        |
|------|-------|---------|-----|------------------|----------------|-------------------------------------|---------------------------------|----------------------------|-----------------------------|--------------------|---------|-------------|-----------------------------------------------------|
| 1    | 24.06 | 96.0    | 12  | 2/25             | K1460k         | (R) L I V N K N A G E T L L Q R (A) | 1568.9119                       | 114.0614                   | 11.0                        | 192189.6/6.06      | HUMAN   | Q6W2J9      | BCL-6 corepressor OS=Homo sapiens GN=BCOR PE=1 SV=1 |

Detailed Results

| Rank                    | Score  | SPI (%) | BCS    | # Unmatched Ions | Variable sites | Sequence                            | MH <sup>+</sup> Calculated (Da) | MH <sup>+</sup> Error (Da) | MH <sup>+</sup> Error (ppm) | Protein MW/pI (Da) | Species | Accession # | MS-Digest Index # | Protein Name                                        |         |         |                    |         |                       |                       |                       |         |         |         |          |
|-------------------------|--------|---------|--------|------------------|----------------|-------------------------------------|---------------------------------|----------------------------|-----------------------------|--------------------|---------|-------------|-------------------|-----------------------------------------------------|---------|---------|--------------------|---------|-----------------------|-----------------------|-----------------------|---------|---------|---------|----------|
| 1                       | 24.06  | 96.0    | 12     | 2/25             | K1460k         | (R) L I V N K N A G E T L L Q R (A) | 1568.9119                       | 114.0614                   | 11.0                        | 192189.6/6.06      | HUMAN   | Q6W2J9      | 65703             | BCL-6 corepressor OS=Homo sapiens GN=BCOR PE=1 SV=1 |         |         |                    |         |                       |                       |                       |         |         |         |          |
| Fragment-Ion (m/z)      | 70.066 | 72.080  | 84.080 | 86.096           | 87.098         | 175.117                             | 187.145                         | 199.180                    | 200.187                     | 215.141            | 227.175 | 303.178     | 357.192           | 416.262                                             | 456.261 | 529.347 | 622.324            | 630.396 | 679.376 <sup>+2</sup> | 719.899 <sup>+2</sup> | 728.904 <sup>+2</sup> | 759.438 | 816.465 | 887.495 | 1001.539 |
| Frac. Inten. (% of TIC) | 0.00   | 0.09    | 0.30   | 27.78            | 2.30           | 3.22                                | 1.34                            | 13.85                      | 1.71                        | 1.47               | 4.53    | 2.75        | 1.54              | 4.83                                                | 1.68    | 2.78    | 1.67               | 4.57    | 1.74                  | 2.02                  | 5.85                  | 1.84    | 6.03    | 2.98    | 3.14     |
| Rel. Inten. (% of BP)   | 0.01   | 0.33    | 1.07   | 100.00           | 8.29           | 11.60                               | 4.84                            | 49.87                      | 6.15                        | 5.30               | 16.31   | 9.89        | 5.53              | 17.39                                               | 6.03    | 10.01   | 6.00               | 16.46   | 6.25                  | 7.26                  | 21.05                 | 6.63    | 21.69   | 10.75   | 11.31    |
| Score                   | 0.20   | 0.50    | 0.50   | 0.50             | -0.08          | 1.50                                | 0.50                            | 0.50                       | -0.06                       | 0.75               | 0.75    | 1.50        | 0.75              | 1.50                                                | 0.75    | 1.50    | 1.50               | 1.50    | 1.50                  | 0.50                  | 1.50                  | 1.50    | 1.50    | 1.50    | 1.50     |
| Ion-type                | PR     | V       | KQ     | a1               |                | y1                                  | TL-28                           | a2                         |                             | TL                 | b2      | y2          | kN                | y3                                                  | VNk     | y4      | y <sup>++</sup> 10 | y5      |                       | y11 <sup>+2</sup>     | y12 <sup>+2</sup>     | y6      | y7      | y8      | y9       |
| Delta ppm               | 9.6    | -5.2    | -9.2   | -2.6             |                | -10.6                               | 2.6                             | -3.5                       |                             | 6.9                | -1.3    | 0.6         | 11.8              | 0.7                                                 | 9.8     | 3.1     | -28.1              | 3.7     | 19.3                  | 10.2                  | 9.4                   | 3.1     | 8.7     | 0.8     | 1.3      |

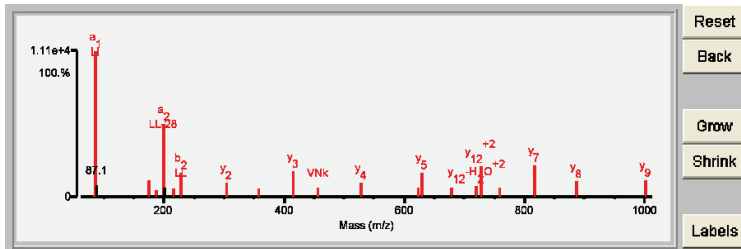

Reset  
Back  
Grow  
Shrink  
Labels

Result Summary

| Rank | Score | SPI (%) | BCS | # Unmatched Ions | Variable sites | Sequence                 | MH <sup>+</sup> Calculated (Da) | MH <sup>+</sup> Error (Da) | MH <sup>+</sup> Error (ppm) | Protein MW/pI (Da) | Species | Accession # | Protein Name                                                                                 |
|------|-------|---------|-----|------------------|----------------|--------------------------|---------------------------------|----------------------------|-----------------------------|--------------------|---------|-------------|----------------------------------------------------------------------------------------------|
| 1    | 18.07 | 81.6    | 9   | 5/25             | K509k          | (K)MkALFEEVPELLTEAEK(K)  | 2032.0637                       | 114.0327                   | -4.8                        | 64616.2/6.27       | HUMAN   | P31939      | Bifunctional purine biosynthesis protein PURH OS=Homo sapiens GN=ATIC PE=1 SV=3              |
| 2    | 8.81  | 60.5    | 2   | 12/25            | K333k K335k    | (R)ATkSkMELSQVTPPELQK(A) | 1918.0314                       | 228.0651                   | -9.7                        | 94048.1/7.99       | HUMAN   | RQ5TYWZ     | REVERSE Ankyrin repeat domain-containing protein 20A1 OS=Homo sapiens GN=ANKRD20A1 PE=2 SV=1 |
| 2    | 8.81  | 60.5    | 2   | 12/25            | K333k K335k    | (R)ATkSkMELSQVTPPELQK(A) | 1918.0314                       | 228.0651                   | -9.7                        | 94087.1/8.13       | HUMAN   | RQ6SQ80     | REVERSE Ankyrin repeat domain-containing protein 20A2 OS=Homo sapiens GN=ANKRD20A2 PE=2 SV=1 |
| 2    | 8.81  | 60.5    | 2   | 12/25            | K333k K335k    | (R)ATkSkMELSQVTPPELQK(A) | 1918.0314                       | 228.0651                   | -9.7                        | 94108.1/8.13       | HUMAN   | RQ6VUR7     | REVERSE Ankyrin repeat domain-containing protein 20A3 OS=Homo sapiens GN=ANKRD20A3 PE=4 SV=1 |
| 2    | 8.81  | 60.5    | 2   | 12/25            | K333k K335k    | (R)ATkSkMELSQVTPPELQK(A) | 1918.0314                       | 228.0651                   | -9.7                        | 94149.2/8.13       | HUMAN   | RQ4UJ75     | REVERSE Ankyrin repeat domain-containing protein 20A4 OS=Homo sapiens GN=ANKRD20A4 PE=2 SV=1 |

Detailed Results

| Rank                                                                                                                                                                                                                                                                                                                                                                                                                                                                                                                                                                                                                                                                                                                                                                                                                                                                                                                                                                                                                                                                                                                                                                                                                                                                                                                                                                                                                                                                                                                                                                                                                                                                                                                                                                                                                                                                                                                                                                                                                                                                                                                                                                                                                                                                                                                                                                                                                                                                                                                                                    | Score  | SPI (%) | BCS    | # Unmatched Ions | Variable sites | Sequence                | MH <sup>+</sup> Calculated (Da) | MH <sup>+</sup> Error (Da) | MH <sup>+</sup> Error (ppm) | Protein MW/pI (Da) | Species | Accession # | MS-Digest Index # | Protein Name                                                                    |                       |                  |                       |         |         |         |         |         |          |          |          |         |         |         |         |                       |         |                       |         |         |         |         |         |          |          |          |                        |      |      |      |      |      |      |      |      |      |      |      |      |      |      |      |      |       |      |      |      |      |      |      |       |      |                      |      |      |      |      |       |      |      |      |      |       |       |      |      |      |      |      |        |      |       |      |       |      |       |       |       |       |      |      |  |       |       |      |      |      |      |      |       |       |      |      |      |       |      |      |      |      |      |      |      |      |      |          |    |   |   |  |  |   |   |    |       |    |  |     |    |                                   |  |                  |  |    |    |    |    |    |    |    |    |           |       |       |  |  |  |       |       |       |       |       |  |       |       |       |      |  |       |  |       |       |      |       |       |       |       |
|---------------------------------------------------------------------------------------------------------------------------------------------------------------------------------------------------------------------------------------------------------------------------------------------------------------------------------------------------------------------------------------------------------------------------------------------------------------------------------------------------------------------------------------------------------------------------------------------------------------------------------------------------------------------------------------------------------------------------------------------------------------------------------------------------------------------------------------------------------------------------------------------------------------------------------------------------------------------------------------------------------------------------------------------------------------------------------------------------------------------------------------------------------------------------------------------------------------------------------------------------------------------------------------------------------------------------------------------------------------------------------------------------------------------------------------------------------------------------------------------------------------------------------------------------------------------------------------------------------------------------------------------------------------------------------------------------------------------------------------------------------------------------------------------------------------------------------------------------------------------------------------------------------------------------------------------------------------------------------------------------------------------------------------------------------------------------------------------------------------------------------------------------------------------------------------------------------------------------------------------------------------------------------------------------------------------------------------------------------------------------------------------------------------------------------------------------------------------------------------------------------------------------------------------------------|--------|---------|--------|------------------|----------------|-------------------------|---------------------------------|----------------------------|-----------------------------|--------------------|---------|-------------|-------------------|---------------------------------------------------------------------------------|-----------------------|------------------|-----------------------|---------|---------|---------|---------|---------|----------|----------|----------|---------|---------|---------|---------|-----------------------|---------|-----------------------|---------|---------|---------|---------|---------|----------|----------|----------|------------------------|------|------|------|------|------|------|------|------|------|------|------|------|------|------|------|------|-------|------|------|------|------|------|------|-------|------|----------------------|------|------|------|------|-------|------|------|------|------|-------|-------|------|------|------|------|------|--------|------|-------|------|-------|------|-------|-------|-------|-------|------|------|--|-------|-------|------|------|------|------|------|-------|-------|------|------|------|-------|------|------|------|------|------|------|------|------|------|----------|----|---|---|--|--|---|---|----|-------|----|--|-----|----|-----------------------------------|--|------------------|--|----|----|----|----|----|----|----|----|-----------|-------|-------|--|--|--|-------|-------|-------|-------|-------|--|-------|-------|-------|------|--|-------|--|-------|-------|------|-------|-------|-------|-------|
| 1                                                                                                                                                                                                                                                                                                                                                                                                                                                                                                                                                                                                                                                                                                                                                                                                                                                                                                                                                                                                                                                                                                                                                                                                                                                                                                                                                                                                                                                                                                                                                                                                                                                                                                                                                                                                                                                                                                                                                                                                                                                                                                                                                                                                                                                                                                                                                                                                                                                                                                                                                       | 18.07  | 81.6    | 9      | 5/25             | K509k          | (K)WkALFEEVPELLTEAEK(K) | 2032.0637                       | 114.0327                   | -4.8                        | 64616.2/6.27       | HUMAN   | P31939      | 538719            | Bifunctional purine biosynthesis protein PURH OS=Homo sapiens GN=ATIC PE=1 SV=3 |                       |                  |                       |         |         |         |         |         |          |          |          |         |         |         |         |                       |         |                       |         |         |         |         |         |          |          |          |                        |      |      |      |      |      |      |      |      |      |      |      |      |      |      |      |      |       |      |      |      |      |      |      |       |      |                      |      |      |      |      |       |      |      |      |      |       |       |      |      |      |      |      |        |      |       |      |       |      |       |       |       |       |      |      |  |       |       |      |      |      |      |      |       |       |      |      |      |       |      |      |      |      |      |      |      |      |      |          |    |   |   |  |  |   |   |    |       |    |  |     |    |                                   |  |                  |  |    |    |    |    |    |    |    |    |           |       |       |  |  |  |       |       |       |       |       |  |       |       |       |      |  |       |  |       |       |      |       |       |       |       |
| <table border="1"> <thead> <tr> <th>Fragment-ion (m/z)</th> <th>70.062</th> <th>72.079</th> <th>84.041</th> <th>84.077</th> <th>86.093</th> <th>102.051</th> <th>120.078</th> <th>147.111</th> <th>199.101</th> <th>227.096</th> <th>230.107</th> <th>328.150</th> <th>340.179</th> <th>476.223</th> <th>506.269*<sup>2</sup></th> <th>509.745</th> <th>515.269*<sup>2</sup></th> <th>577.273</th> <th>690.360</th> <th>760.414</th> <th>803.439</th> <th>932.471</th> <th>1018.484</th> <th>1029.530</th> <th>1117.555</th> </tr> </thead> <tbody> <tr> <td>Frac. Inten.(% of TIC)</td> <td>0.01</td> <td>0.42</td> <td>0.06</td> <td>2.01</td> <td>4.72</td> <td>0.10</td> <td>0.07</td> <td>1.67</td> <td>2.89</td> <td>2.98</td> <td>6.96</td> <td>2.43</td> <td>2.28</td> <td>1.77</td> <td>1.81</td> <td>2.25</td> <td>29.00</td> <td>2.55</td> <td>3.22</td> <td>1.55</td> <td>2.97</td> <td>1.81</td> <td>8.38</td> <td>14.11</td> <td>4.00</td> </tr> <tr> <td>Rel. Inten.(% of BP)</td> <td>0.02</td> <td>1.46</td> <td>0.21</td> <td>6.93</td> <td>16.29</td> <td>0.34</td> <td>0.23</td> <td>5.75</td> <td>9.95</td> <td>10.27</td> <td>24.00</td> <td>8.38</td> <td>7.88</td> <td>6.10</td> <td>6.24</td> <td>7.76</td> <td>100.00</td> <td>8.78</td> <td>11.09</td> <td>5.34</td> <td>10.23</td> <td>6.24</td> <td>28.88</td> <td>48.66</td> <td>13.80</td> </tr> <tr> <td>Score</td> <td>0.20</td> <td>0.50</td> <td></td> <td>-0.07</td> <td>-0.16</td> <td>1.00</td> <td>1.00</td> <td>1.50</td> <td>0.50</td> <td>0.75</td> <td>-0.24</td> <td>-0.08</td> <td>0.75</td> <td>1.50</td> <td>0.50</td> <td>-0.08</td> <td>1.50</td> <td>1.50</td> <td>1.50</td> <td>0.50</td> <td>1.50</td> <td>0.50</td> <td>1.50</td> <td>0.50</td> <td>1.50</td> </tr> <tr> <td>Ion-type</td> <td>PR</td> <td>V</td> <td>E</td> <td></td> <td></td> <td>E</td> <td>F</td> <td>y1</td> <td>PE-28</td> <td>PE</td> <td></td> <td>PEL</td> <td>y4</td> <td>y9-H<sub>2</sub>O*<sup>2</sup></td> <td></td> <td>y5*<sup>2</sup></td> <td></td> <td>y6</td> <td>y6</td> <td>b5</td> <td>y7</td> <td>y8</td> <td>b7</td> <td>y9</td> <td>b8</td> </tr> <tr> <td>Delta ppm</td> <td>-38.9</td> <td>-30.2</td> <td></td> <td></td> <td></td> <td>-38.8</td> <td>-20.6</td> <td>-11.6</td> <td>-38.3</td> <td>-34.5</td> <td></td> <td>-25.0</td> <td>-25.0</td> <td>-26.0</td> <td>-4.5</td> <td></td> <td>-15.5</td> <td></td> <td>-16.4</td> <td>-10.1</td> <td>-1.8</td> <td>-15.1</td> <td>-24.2</td> <td>-15.9</td> <td>-12.7</td> </tr> </tbody> </table> |        |         |        |                  |                |                         |                                 |                            |                             |                    |         |             |                   |                                                                                 | Fragment-ion (m/z)    | 70.062           | 72.079                | 84.041  | 84.077  | 86.093  | 102.051 | 120.078 | 147.111  | 199.101  | 227.096  | 230.107 | 328.150 | 340.179 | 476.223 | 506.269* <sup>2</sup> | 509.745 | 515.269* <sup>2</sup> | 577.273 | 690.360 | 760.414 | 803.439 | 932.471 | 1018.484 | 1029.530 | 1117.555 | Frac. Inten.(% of TIC) | 0.01 | 0.42 | 0.06 | 2.01 | 4.72 | 0.10 | 0.07 | 1.67 | 2.89 | 2.98 | 6.96 | 2.43 | 2.28 | 1.77 | 1.81 | 2.25 | 29.00 | 2.55 | 3.22 | 1.55 | 2.97 | 1.81 | 8.38 | 14.11 | 4.00 | Rel. Inten.(% of BP) | 0.02 | 1.46 | 0.21 | 6.93 | 16.29 | 0.34 | 0.23 | 5.75 | 9.95 | 10.27 | 24.00 | 8.38 | 7.88 | 6.10 | 6.24 | 7.76 | 100.00 | 8.78 | 11.09 | 5.34 | 10.23 | 6.24 | 28.88 | 48.66 | 13.80 | Score | 0.20 | 0.50 |  | -0.07 | -0.16 | 1.00 | 1.00 | 1.50 | 0.50 | 0.75 | -0.24 | -0.08 | 0.75 | 1.50 | 0.50 | -0.08 | 1.50 | 1.50 | 1.50 | 0.50 | 1.50 | 0.50 | 1.50 | 0.50 | 1.50 | Ion-type | PR | V | E |  |  | E | F | y1 | PE-28 | PE |  | PEL | y4 | y9-H <sub>2</sub> O* <sup>2</sup> |  | y5* <sup>2</sup> |  | y6 | y6 | b5 | y7 | y8 | b7 | y9 | b8 | Delta ppm | -38.9 | -30.2 |  |  |  | -38.8 | -20.6 | -11.6 | -38.3 | -34.5 |  | -25.0 | -25.0 | -26.0 | -4.5 |  | -15.5 |  | -16.4 | -10.1 | -1.8 | -15.1 | -24.2 | -15.9 | -12.7 |
| Fragment-ion (m/z)                                                                                                                                                                                                                                                                                                                                                                                                                                                                                                                                                                                                                                                                                                                                                                                                                                                                                                                                                                                                                                                                                                                                                                                                                                                                                                                                                                                                                                                                                                                                                                                                                                                                                                                                                                                                                                                                                                                                                                                                                                                                                                                                                                                                                                                                                                                                                                                                                                                                                                                                      | 70.062 | 72.079  | 84.041 | 84.077           | 86.093         | 102.051                 | 120.078                         | 147.111                    | 199.101                     | 227.096            | 230.107 | 328.150     | 340.179           | 476.223                                                                         | 506.269* <sup>2</sup> | 509.745          | 515.269* <sup>2</sup> | 577.273 | 690.360 | 760.414 | 803.439 | 932.471 | 1018.484 | 1029.530 | 1117.555 |         |         |         |         |                       |         |                       |         |         |         |         |         |          |          |          |                        |      |      |      |      |      |      |      |      |      |      |      |      |      |      |      |      |       |      |      |      |      |      |      |       |      |                      |      |      |      |      |       |      |      |      |      |       |       |      |      |      |      |      |        |      |       |      |       |      |       |       |       |       |      |      |  |       |       |      |      |      |      |      |       |       |      |      |      |       |      |      |      |      |      |      |      |      |      |          |    |   |   |  |  |   |   |    |       |    |  |     |    |                                   |  |                  |  |    |    |    |    |    |    |    |    |           |       |       |  |  |  |       |       |       |       |       |  |       |       |       |      |  |       |  |       |       |      |       |       |       |       |
| Frac. Inten.(% of TIC)                                                                                                                                                                                                                                                                                                                                                                                                                                                                                                                                                                                                                                                                                                                                                                                                                                                                                                                                                                                                                                                                                                                                                                                                                                                                                                                                                                                                                                                                                                                                                                                                                                                                                                                                                                                                                                                                                                                                                                                                                                                                                                                                                                                                                                                                                                                                                                                                                                                                                                                                  | 0.01   | 0.42    | 0.06   | 2.01             | 4.72           | 0.10                    | 0.07                            | 1.67                       | 2.89                        | 2.98               | 6.96    | 2.43        | 2.28              | 1.77                                                                            | 1.81                  | 2.25             | 29.00                 | 2.55    | 3.22    | 1.55    | 2.97    | 1.81    | 8.38     | 14.11    | 4.00     |         |         |         |         |                       |         |                       |         |         |         |         |         |          |          |          |                        |      |      |      |      |      |      |      |      |      |      |      |      |      |      |      |      |       |      |      |      |      |      |      |       |      |                      |      |      |      |      |       |      |      |      |      |       |       |      |      |      |      |      |        |      |       |      |       |      |       |       |       |       |      |      |  |       |       |      |      |      |      |      |       |       |      |      |      |       |      |      |      |      |      |      |      |      |      |          |    |   |   |  |  |   |   |    |       |    |  |     |    |                                   |  |                  |  |    |    |    |    |    |    |    |    |           |       |       |  |  |  |       |       |       |       |       |  |       |       |       |      |  |       |  |       |       |      |       |       |       |       |
| Rel. Inten.(% of BP)                                                                                                                                                                                                                                                                                                                                                                                                                                                                                                                                                                                                                                                                                                                                                                                                                                                                                                                                                                                                                                                                                                                                                                                                                                                                                                                                                                                                                                                                                                                                                                                                                                                                                                                                                                                                                                                                                                                                                                                                                                                                                                                                                                                                                                                                                                                                                                                                                                                                                                                                    | 0.02   | 1.46    | 0.21   | 6.93             | 16.29          | 0.34                    | 0.23                            | 5.75                       | 9.95                        | 10.27              | 24.00   | 8.38        | 7.88              | 6.10                                                                            | 6.24                  | 7.76             | 100.00                | 8.78    | 11.09   | 5.34    | 10.23   | 6.24    | 28.88    | 48.66    | 13.80    |         |         |         |         |                       |         |                       |         |         |         |         |         |          |          |          |                        |      |      |      |      |      |      |      |      |      |      |      |      |      |      |      |      |       |      |      |      |      |      |      |       |      |                      |      |      |      |      |       |      |      |      |      |       |       |      |      |      |      |      |        |      |       |      |       |      |       |       |       |       |      |      |  |       |       |      |      |      |      |      |       |       |      |      |      |       |      |      |      |      |      |      |      |      |      |          |    |   |   |  |  |   |   |    |       |    |  |     |    |                                   |  |                  |  |    |    |    |    |    |    |    |    |           |       |       |  |  |  |       |       |       |       |       |  |       |       |       |      |  |       |  |       |       |      |       |       |       |       |
| Score                                                                                                                                                                                                                                                                                                                                                                                                                                                                                                                                                                                                                                                                                                                                                                                                                                                                                                                                                                                                                                                                                                                                                                                                                                                                                                                                                                                                                                                                                                                                                                                                                                                                                                                                                                                                                                                                                                                                                                                                                                                                                                                                                                                                                                                                                                                                                                                                                                                                                                                                                   | 0.20   | 0.50    |        | -0.07            | -0.16          | 1.00                    | 1.00                            | 1.50                       | 0.50                        | 0.75               | -0.24   | -0.08       | 0.75              | 1.50                                                                            | 0.50                  | -0.08            | 1.50                  | 1.50    | 1.50    | 0.50    | 1.50    | 0.50    | 1.50     | 0.50     | 1.50     |         |         |         |         |                       |         |                       |         |         |         |         |         |          |          |          |                        |      |      |      |      |      |      |      |      |      |      |      |      |      |      |      |      |       |      |      |      |      |      |      |       |      |                      |      |      |      |      |       |      |      |      |      |       |       |      |      |      |      |      |        |      |       |      |       |      |       |       |       |       |      |      |  |       |       |      |      |      |      |      |       |       |      |      |      |       |      |      |      |      |      |      |      |      |      |          |    |   |   |  |  |   |   |    |       |    |  |     |    |                                   |  |                  |  |    |    |    |    |    |    |    |    |           |       |       |  |  |  |       |       |       |       |       |  |       |       |       |      |  |       |  |       |       |      |       |       |       |       |
| Ion-type                                                                                                                                                                                                                                                                                                                                                                                                                                                                                                                                                                                                                                                                                                                                                                                                                                                                                                                                                                                                                                                                                                                                                                                                                                                                                                                                                                                                                                                                                                                                                                                                                                                                                                                                                                                                                                                                                                                                                                                                                                                                                                                                                                                                                                                                                                                                                                                                                                                                                                                                                | PR     | V       | E      |                  |                | E                       | F                               | y1                         | PE-28                       | PE                 |         | PEL         | y4                | y9-H <sub>2</sub> O* <sup>2</sup>                                               |                       | y5* <sup>2</sup> |                       | y6      | y6      | b5      | y7      | y8      | b7       | y9       | b8       |         |         |         |         |                       |         |                       |         |         |         |         |         |          |          |          |                        |      |      |      |      |      |      |      |      |      |      |      |      |      |      |      |      |       |      |      |      |      |      |      |       |      |                      |      |      |      |      |       |      |      |      |      |       |       |      |      |      |      |      |        |      |       |      |       |      |       |       |       |       |      |      |  |       |       |      |      |      |      |      |       |       |      |      |      |       |      |      |      |      |      |      |      |      |      |          |    |   |   |  |  |   |   |    |       |    |  |     |    |                                   |  |                  |  |    |    |    |    |    |    |    |    |           |       |       |  |  |  |       |       |       |       |       |  |       |       |       |      |  |       |  |       |       |      |       |       |       |       |
| Delta ppm                                                                                                                                                                                                                                                                                                                                                                                                                                                                                                                                                                                                                                                                                                                                                                                                                                                                                                                                                                                                                                                                                                                                                                                                                                                                                                                                                                                                                                                                                                                                                                                                                                                                                                                                                                                                                                                                                                                                                                                                                                                                                                                                                                                                                                                                                                                                                                                                                                                                                                                                               | -38.9  | -30.2   |        |                  |                | -38.8                   | -20.6                           | -11.6                      | -38.3                       | -34.5              |         | -25.0       | -25.0             | -26.0                                                                           | -4.5                  |                  | -15.5                 |         | -16.4   | -10.1   | -1.8    | -15.1   | -24.2    | -15.9    | -12.7    |         |         |         |         |                       |         |                       |         |         |         |         |         |          |          |          |                        |      |      |      |      |      |      |      |      |      |      |      |      |      |      |      |      |       |      |      |      |      |      |      |       |      |                      |      |      |      |      |       |      |      |      |      |       |       |      |      |      |      |      |        |      |       |      |       |      |       |       |       |       |      |      |  |       |       |      |      |      |      |      |       |       |      |      |      |       |      |      |      |      |      |      |      |      |      |          |    |   |   |  |  |   |   |    |       |    |  |     |    |                                   |  |                  |  |    |    |    |    |    |    |    |    |           |       |       |  |  |  |       |       |       |       |       |  |       |       |       |      |  |       |  |       |       |      |       |       |       |       |

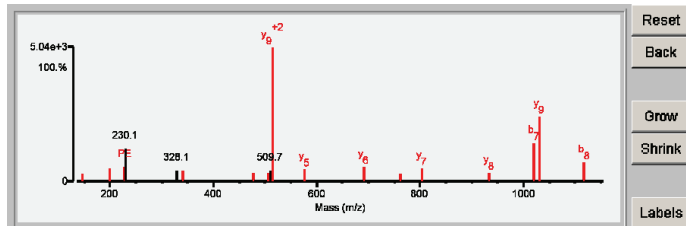

Result Summary

| Rank | Score | SPI (%) | BCS | # Unmatched Ions | Variable sites | Sequence                        | MH <sup>+</sup> Calculated (Da) | MH <sup>+</sup> Error (Da) | MH <sup>+</sup> Error (ppm) | Protein MW (Da) | Species | Accession #             | Protein Name                                                                |
|------|-------|---------|-----|------------------|----------------|---------------------------------|---------------------------------|----------------------------|-----------------------------|-----------------|---------|-------------------------|-----------------------------------------------------------------------------|
| 1    | 23.35 | 91.6    | 10  | 3/25             | K381k K385k    | (R)LVASKTDGKIVQYECGDTCQEEK(I)   | 2787.2812                       | 228.1150                   | 9.7                         | 67291.0/5.64    | HUMAN   | <a href="#">Q7Z569</a>  | BRCA1-associated protein OS=Homo sapiens GN=BRAP PE=1 SV=1                  |
| 2    | 6.51  | 53.7    | 1   | 12/25            | M184m          | (R)CFNLYTSFESPYGKCLVEIPTSmKK(E) | 2999.4351                       | 15.9610                    | -11.2                       | 47315.4/9.68    | HUMAN   | <a href="#">RP49674</a> | REVERSE Casein kinase I isoform epsilon OS=Homo sapiens GN=CSNK1E PE=1 SV=1 |

Detailed Results

| Rank | Score | SPI (%) | BCS | # Unmatched Ions | Variable sites | Sequence                                | MH <sup>+</sup> Calculated (Da) | MH <sup>+</sup> Error (Da) | MH <sup>+</sup> Error (ppm) | Protein MW (Da) | Species | Accession #            | MS-Digest Index #     | Protein Name                                               |
|------|-------|---------|-----|------------------|----------------|-----------------------------------------|---------------------------------|----------------------------|-----------------------------|-----------------|---------|------------------------|-----------------------|------------------------------------------------------------|
| 1    | 23.35 | 91.6    | 10  | 3/25             | K381k K385k    | (R)LVASkTDGkIVQYEC/E/G/D/T/C/Q/E/E/K(I) | 2787.2812                       | 228.1150                   | 9.7                         | 67291.0/5.64    | HUMAN   | <a href="#">Q7Z569</a> | <a href="#">70829</a> | BRCA1-associated protein OS=Homo sapiens GN=BRAP PE=1 SV=1 |

| Fragment-ion (m/z)      | 72.080 | 84.044 | 84.080 | 86.097 | 102.054 | 133.042 | 136.076 | 147.111 | 185.165 | 186.168 | 213.160 | 276.155 | 397.672 <sup>+2</sup> | 515.263 | 533.261 | 628.227           | 693.292 | 774.873 <sup>+2</sup> | 794.336 | 880.962 <sup>+2</sup> | 909.364 | 936.083 <sup>+3</sup> | 966.385 | 1095.426 | 1255.456 |
|-------------------------|--------|--------|--------|--------|---------|---------|---------|---------|---------|---------|---------|---------|-----------------------|---------|---------|-------------------|---------|-----------------------|---------|-----------------------|---------|-----------------------|---------|----------|----------|
| Frac. Inten. (% of TIC) | 0.23   | 0.10   | 0.19   | 12.33  | 0.18    | 4.06    | 0.13    | 2.88    | 20.83   | 2.34    | 9.23    | 2.09    | 2.21                  | 2.55    | 2.05    | 2.45              | 4.44    | 1.97                  | 5.23    | 2.14                  | 3.13    | 2.49                  | 9.07    | 3.73     | 3.96     |
| Rel. Inten. (% of BP)   | 1.11   | 0.49   | 0.93   | 59.20  | 0.84    | 19.51   | 0.63    | 13.84   | 100.00  | 11.25   | 44.32   | 10.03   | 10.60                 | 12.22   | 9.82    | 11.74             | 21.32   | 9.45                  | 25.10   | 10.26                 | 15.01   | 11.94                 | 43.55   | 17.91    | 19.04    |
| Score                   | 0.50   | 0.50   | 0.50   | a1     | 1.00    | -0.20   | 1.00    | 1.50    | 0.50    | -0.11   | 0.75    | 1.50    | 1.50                  | 0.50    | 1.50    | 1.50              | 1.50    | -0.09                 | 1.50    | 0.50                  | 1.50    | 1.50                  | 1.50    | 1.50     | 1.50     |
| Ion-type                | V      | E      | KQ     |        | E       |         | Y       | y1      | a2      |         | b2      | y2      | y6 <sup>+2</sup>      | y4-H2O  | y4      | y4 <sup>+10</sup> | y5      |                       | y6      | b14 <sup>+2</sup>     | y7      | y22 <sup>+3</sup>     | y8      | y9       | y10      |
| Delta ppm               | -6.6   |        | -8.0   |        | -6.4    |         | 1.5     | -10.2   |         |         | -5.6    | -4.9    | -2.2                  | 2.1     | 33.6    | 8.1               | -8.0    | 6.6                   |         | 1.5                   | 2.8     | 7.3                   | 2.3     | 0.3      | -0.2     |

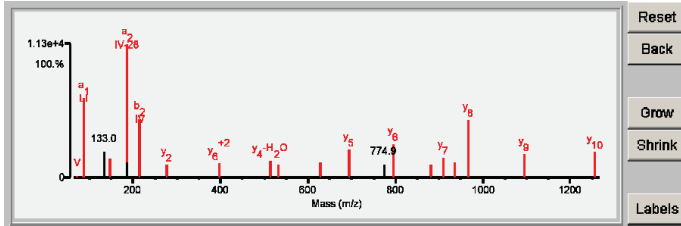

Result Summary

| Rank | Score | SPI (%) | BCS | # Unmatched Ions | Variable sites | Sequence                                                     | MH <sup>+</sup> Calculated (Da) | MH <sup>+</sup> Error (Da) | MH <sup>+</sup> Error (ppm) | Protein MW/pi (Da) | Species | Accession # | Protein Name                                               |
|------|-------|---------|-----|------------------|----------------|--------------------------------------------------------------|---------------------------------|----------------------------|-----------------------------|--------------------|---------|-------------|------------------------------------------------------------|
| 1    | 19.31 | 82.4    | 12  | 5/25             | K385k          | (K)T D G k I V Q Y E / C / E / G / D / T / C Q / E / E K (I) | 2288.9646                       | 114.0459                   | 1.2                         | 67291.0/5.64       | HUMAN   | Q7Z569      | BRCA1-associated protein OS=Homo sapiens GN=BRAP PE=1 SV=1 |

Detailed Results

| Rank | Score | SPI (%) | BCS | # Unmatched Ions | Variable sites | Sequence                                                      | MH <sup>+</sup> Calculated (Da) | MH <sup>+</sup> Error (Da) | MH <sup>+</sup> Error (ppm) | Protein MW/pi (Da) | Species | Accession # | MS-Digest Index # | Protein Name                                               |
|------|-------|---------|-----|------------------|----------------|---------------------------------------------------------------|---------------------------------|----------------------------|-----------------------------|--------------------|---------|-------------|-------------------|------------------------------------------------------------|
| 1    | 19.31 | 82.4    | 12  | 5/25             | K385k          | (K) T D G k I V Q Y E / C / E / G / D / T / C Q / E / E K (I) | 2288.9646                       | 114.0459                   | 1.2                         | 67291.0/5.64       | HUMAN   | Q7Z569      | 70829             | BRCA1-associated protein OS=Homo sapiens GN=BRAP PE=1 SV=1 |

  

| Fragment-ion (m/z)      | 86.094 | 136.075 | 217.081        | 276.155        | 290.076 | 300.164 | 405.187        | 415.189 | 420.197            | 582.246 | 615.294 | 628.241 | 684.237 | 693.279 | 710.397                          | 728.401        | 794.324        | 841.428 | 856.440        | 909.342        | 966.377        | 1019.503 | 1095.421       | 1255.453        | 1384.461        |
|-------------------------|--------|---------|----------------|----------------|---------|---------|----------------|---------|--------------------|---------|---------|---------|---------|---------|----------------------------------|----------------|----------------|---------|----------------|----------------|----------------|----------|----------------|-----------------|-----------------|
| Frac. Inten. (% of TIC) | 0.12   | 0.10    | 6.26           | 3.24           | 3.24    | 2.73    | 4.48           | 2.86    | 5.35               | 3.77    | 2.82    | 10.57   | 2.96    | 4.63    | 3.25                             | 4.50           | 6.81           | 2.69    | 6.36           | 2.74           | 8.03           | 2.82     | 2.86           | 4.13            | 2.64            |
| Rel. Inten. (% of BP)   | 1.17   | 0.98    | 59.23          | 30.68          | 30.64   | 25.87   | 42.38          | 27.10   | 50.65              | 35.68   | 26.67   | 100.00  | 28.21   | 43.84   | 30.72                            | 42.61          | 64.47          | 25.48   | 60.16          | 25.94          | 76.02          | 26.67    | 27.10          | 39.11           | 24.98           |
| Score                   | 0.22   | 1.00    | 0.75           | 1.50           | 0.75    | 0.75    | 1.50           | 0.75    | -0.51              | -0.36   | -0.27   | 1.50    | -0.28   | 1.50    | 0.25                             | 0.50           | 1.50           | 0.25    | 0.50           | 1.50           | 1.50           | 0.50     | 1.50           | 1.50            | 1.50            |
| Ion-type                | LI     | Y       | b <sub>2</sub> | y <sub>2</sub> | CE      | Gk      | y <sub>3</sub> | DGk     | y <sup>++</sup> 10 |         |         |         |         | ys      | b <sub>6</sub> +H <sub>2</sub> O | b <sub>6</sub> | y <sub>6</sub> |         | b <sub>7</sub> | y <sub>7</sub> | y <sub>8</sub> | bs       | y <sub>9</sub> | y <sub>10</sub> | y <sub>11</sub> |
| Delta ppm               | -24.7  | -8.7    |                | -0.4           | -19.0   | -11.4   | -26.1          | -13.7   |                    |         |         | 14.2    |         | -11.3   | 17.8                             | 7.9            | -13.8          |         | -16.1          | -21.4          | -6.7           | -13.4    | -4.7           | -3.0            | -27.7           |

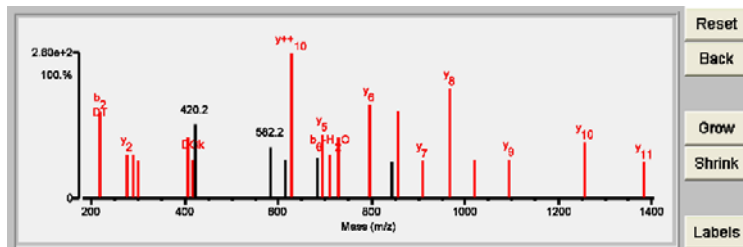

Result Summary

| Rank | Score | SPI (%) | BCS | # Unmatched Ions | Variable sites | Sequence              | MH <sup>+</sup> Calculated (Da) | MH <sup>+</sup> Error (Da) | MH <sup>+</sup> Error (ppm) | Protein MW/pi (Da) | Species | Accession # | Protein Name                                  |
|------|-------|---------|-----|------------------|----------------|-----------------------|---------------------------------|----------------------------|-----------------------------|--------------------|---------|-------------|-----------------------------------------------|
| 1    | 13.41 | 69.9    | 9   | 9/25             | K31k           | (K)DGDGTTTKELGTVMR(S) | 1693.8425                       | 114.0528                   | 5.5                         | 16837.714.09       | HUMAN   | P62158      | Calmodulin OS=Homo sapiens GN=CALM1 PE=1 SV=2 |

Detailed Results

| Rank                   | Score | SPI (%) | BCS    | # Unmatched Ions | Variable sites | Sequence              | MH <sup>+</sup> Calculated (Da) | MH <sup>+</sup> Error (Da) | MH <sup>+</sup> Error (ppm) | Protein MW/pi (Da) | Species | Accession # | MS-Digest Index # | Protein Name                                  |         |                       |                       |         |                       |                       |                       |                       |         |         |         |          |
|------------------------|-------|---------|--------|------------------|----------------|-----------------------|---------------------------------|----------------------------|-----------------------------|--------------------|---------|-------------|-------------------|-----------------------------------------------|---------|-----------------------|-----------------------|---------|-----------------------|-----------------------|-----------------------|-----------------------|---------|---------|---------|----------|
| 1                      | 13.41 | 69.9    | 9      | 9/25             | K31k           | (K)DGDGTTTKELGTVMR(S) | 1693.8425                       | 114.0528                   | 5.5                         | 16837.714.09       | HUMAN   | P62158      | 77191             | Calmodulin OS=Homo sapiens GN=CALM1 PE=1 SV=2 |         |                       |                       |         |                       |                       |                       |                       |         |         |         |          |
| Fragment-ion (m/z)     |       | 84.081  | 86.095 | 136.076          | 145.058        | 173.055               | 175.117                         | 288.078                    | 306.156                     | 327.087            | 353.104 | 356.164     | 371.191           | 428.143                                       | 477.212 | 506.275 <sup>+2</sup> | 524.269 <sup>+2</sup> | 563.296 | 565.284 <sup>+2</sup> | 566.288 <sup>+2</sup> | 616.318 <sup>+2</sup> | 625.339 <sup>+2</sup> | 676.377 | 805.433 | 811.413 | 1047.582 |
| Frac. Inten.(% of TIC) |       | 8.69    | 0.23   | 2.33             | 3.12           | 7.51                  | 3.65                            | 4.37                       | 2.46                        | 3.69               | 2.64    | 2.20        | 3.70              | 5.30                                          | 2.27    | 3.25                  | 3.81                  | 14.58   | 2.42                  | 3.06                  | 2.54                  | 2.84                  | 5.24    | 5.29    | 2.64    | 2.21     |
| Rel. Inten.(% of BP)   |       | 59.58   | 1.54   | 15.99            | 21.43          | 51.52                 | 25.02                           | 29.96                      | 16.87                       | 25.31              | 18.07   | 15.08       | 25.36             | 36.33                                         | 15.56   | 22.30                 | 26.10                 | 100.00  | 16.58                 | 20.96                 | 17.39                 | 19.45                 | 35.92   | 36.27   | 18.11   | 15.17    |
| Score                  |       | -0.60   | 0.22   | -0.16            | 0.50           | 0.75                  | 1.50                            | 0.50                       | 1.50                        | 0.25               | 18.07   | -0.15       | -0.25             | 0.25                                          | -0.16   | -0.22                 | 1.50                  | 100.00  | -0.17                 | 0.50                  | 0.50                  | 1.50                  | 1.50    | 1.50    | -0.18   | 1.50     |
| Ion-type               |       | LI      |        |                  | a2             | b2                    | y1                              | b3                         | y2                          | b4-H2O             |         |             | b5-H2O            |                                               |         | y6 <sup>+2</sup>      | y5                    |         |                       | y9-NH3 <sup>+2</sup>  | y10+H2O <sup>+2</sup> | y10 <sup>+2</sup>     | y6      | y7      | y6      |          |
| Delta ppm              |       |         | -11.9  |                  |                | -26.0                 | -12.6                           | -14.0                      | -19.2                       | -10.9              |         |             | 0.7               |                                               |         | -29.2                 |                       |         |                       | -12.0                 | -13.6                 | 11.7                  | -5.6    | 11.7    | 19.2    |          |

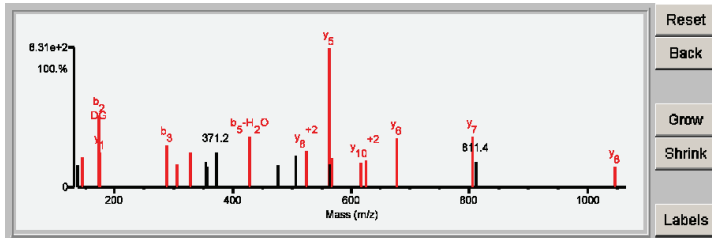

Reset

Back

Grow

Shrink

Labels

Result Summary

| Rank | Score | SPI (%) | BCS | # Unmatched Ions | Variable sites | Sequence               | MH <sup>+</sup> Calculated (Da) | MH <sup>+</sup> Error (Da) | MH <sup>+</sup> Error (ppm) | Protein MW/pi (Da) | Species | Accession # | Protein Name                                  |
|------|-------|---------|-----|------------------|----------------|------------------------|---------------------------------|----------------------------|-----------------------------|--------------------|---------|-------------|-----------------------------------------------|
| 1    | 13.06 | 70.8    | 8   | 11/25            | K95k           | (R)VFDKDGNGYISAAELR(H) | 1754.8708                       | 114.0479                   | 2.6                         | 16837.714.09       | HUMAN   | P62158      | Calmodulin OS=Homo sapiens GN=CALM1 PE=1 SV=2 |

Detailed Results

| Rank                    | Score | SPI (%) | BCS    | # Unmatched Ions | Variable sites | Sequence               | MH <sup>+</sup> Calculated (Da) | MH <sup>+</sup> Error (Da) | MH <sup>+</sup> Error (ppm) | Protein MW/pi (Da) | Species | Accession # | MS-Digest Index # | Protein Name                                  |         |         |         |         |         |         |         |         |                       |         |         |          |  |
|-------------------------|-------|---------|--------|------------------|----------------|------------------------|---------------------------------|----------------------------|-----------------------------|--------------------|---------|-------------|-------------------|-----------------------------------------------|---------|---------|---------|---------|---------|---------|---------|---------|-----------------------|---------|---------|----------|--|
| 1                       | 13.06 | 70.8    | 8      | 11/25            | K95k           | (R)VFDKDGNGYISAAELR(H) | 1754.8708                       | 114.0479                   | 2.6                         | 16837.714.09       | HUMAN   | P62158      | 77191             | Calmodulin OS=Homo sapiens GN=CALM1 PE=1 SV=2 |         |         |         |         |         |         |         |         |                       |         |         |          |  |
| Fragment-ion (m/z)      |       | 70.067  | 72.081 | 84.080           | 86.096         | 120.081                | 136.076                         | 173.123                    | 175.117                     | 199.177            | 219.145 | 288.203     | 300.078           | 340.165                                       | 417.245 | 426.168 | 454.208 | 481.288 | 488.279 | 559.322 | 646.356 | 759.439 | 812.380 <sup>+2</sup> | 834.329 | 947.417 | 1111.462 |  |
| Frac. Inten. (% of TIC) |       | 0.00    | 0.30   | 8.59             | 0.48           | 0.17                   | 0.22                            | 2.20                       | 3.30                        | 1.89               | 6.64    | 5.32        | 2.77              | 1.97                                          | 3.20    | 2.51    | 1.89    | 2.16    | 5.98    | 7.37    | 23.51   | 9.38    | 2.98                  | 2.49    | 2.11    | 2.57     |  |
| Rel. Inten. (% of BP)   |       | 0.01    | 1.27   | 36.56            | 2.04           | 0.73                   | 0.92                            | 9.37                       | 14.02                       | 8.05               | 28.23   | 22.64       | 11.79             | 8.40                                          | 13.59   | 10.87   | 8.06    | 9.19    | 25.43   | 31.36   | 100.00  | 39.88   | 12.69                 | 10.57   | 8.98    | 10.95    |  |
| Score                   |       | 0.20    | 0.50   | -0.37            | 0.22           | 1.00                   | 1.00                            | -0.09                      | 1.50                        | -0.08              | 0.50    | 1.50        | -0.12             | -0.08                                         | 1.50    | -0.11   | -0.08   | -0.09   | 1.50    | 1.50    | 1.50    | 1.50    | -0.13                 | -0.11   | 0.50    | -0.11    |  |
| Ion-type                |       | PR      | a1     |                  | LI             | F                      | Y                               | y1                         | a2                          | y2                 |         | y3          |                   | y3                                            |         |         |         | y4      | y5      | y6      | y7      |         |                       | bs      |         |          |  |
| Delta ppm               |       | 28.2    | -13.5  |                  | -10.8          | 1.9                    | -0.7                            |                            | -10.6                       |                    | -23.2   | -0.4        |                   |                                               | -1.9    |         |         |         | -7.2    | 3.3     | 5.8     | 4.6     |                       |         |         | -5.8     |  |
|                         |       |         | 0.50   |                  |                |                        |                                 |                            |                             |                    |         |             |                   |                                               |         |         |         |         |         |         |         |         |                       |         |         |          |  |
|                         |       |         | 1.7    |                  |                |                        |                                 |                            |                             |                    |         |             |                   |                                               |         |         |         |         |         |         |         |         |                       |         |         |          |  |

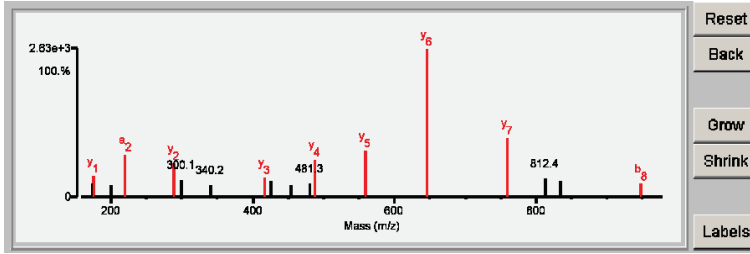

Result Summary

| Rank | Score | SPI (%) | BCS | # Unmatched Ions | Variable sites | Sequence           | MH <sup>+</sup> Calculated (Da) | MH <sup>+</sup> Error (Da) | MH <sup>+</sup> Error (ppm) | Protein MW/pI (Da) | Species | Accession # | Protein Name                                                                                       |
|------|-------|---------|-----|------------------|----------------|--------------------|---------------------------------|----------------------------|-----------------------------|--------------------|---------|-------------|----------------------------------------------------------------------------------------------------|
| 1    | 19.92 | 82.7    | 10  | 6/25             | K261k          | (K)VSILESLDKWER(L) | 1474.7900                       | 114.0471                   | 2.6                         | 43210.1/5.27       | HUMAN   | P10644      | cAMP-dependent protein kinase type I-alpha regulatory subunit OS=Homo sapiens GN=PRKAR1A PE=1 SV=1 |

Detailed Results

| Rank                    | Score | SPI (%)        | BCS    | # Unmatched Ions | Variable sites | Sequence           | MH <sup>+</sup> Calculated (Da) | MH <sup>+</sup> Error (Da) | MH <sup>+</sup> Error (ppm) | Protein MW/pI (Da) | Species | Accession # | MS-Digest Index # | Protein Name                                                                                       |                  |                |                                                |                              |                              |                       |                |                               |                       |                |                |          |
|-------------------------|-------|----------------|--------|------------------|----------------|--------------------|---------------------------------|----------------------------|-----------------------------|--------------------|---------|-------------|-------------------|----------------------------------------------------------------------------------------------------|------------------|----------------|------------------------------------------------|------------------------------|------------------------------|-----------------------|----------------|-------------------------------|-----------------------|----------------|----------------|----------|
| 1                       | 19.92 | 82.7           | 10     | 6/25             | K261k          | (K)VSILESLDKWER(L) | 1474.7900                       | 114.0471                   | 2.6                         | 43210.1/5.27       | HUMAN   | P10644      | 333703            | cAMP-dependent protein kinase type I-alpha regulatory subunit OS=Homo sapiens GN=PRKAR1A PE=1 SV=1 |                  |                |                                                |                              |                              |                       |                |                               |                       |                |                |          |
| Fragment-ion (m/z)      |       | 72.080         | 86.096 | 87.100           | 120.079        | 159.111            | 173.127                         | 175.117                    | 187.106                     | 199.177            | 201.123 | 243.134     | 244.089           | 304.161                                                                                            | 310.164          | 424.216        | 490.239                                        | 579.781 <sup>+2</sup>        | 588.793 <sup>+2</sup>        | 645.325 <sup>+2</sup> | 702.366        | 732.375                       | 745.384 <sup>+2</sup> | 847.409        | 1047.519       | 1176.563 |
| Frac. Inten. (% of TIC) |       | 0.82           | 0.81   | 2.44             | 3.28           | 5.82               | 6.32                            | 3.50                       | 5.56                        | 5.65               | 3.54    | 2.73        | 2.73              | 3.03                                                                                               | 4.79             | 2.58           | 3.60                                           | 4.85                         | 3.37                         | 6.67                  | 2.99           | 2.56                          | 6.26                  | 4.31           | 6.90           | 5.11     |
| Rel. Inten. (% of BP)   |       | 11.89          | 11.67  | 35.29            | 47.59          | 84.27              | 91.53                           | 50.76                      | 80.54                       | 81.89              | 51.23   | 39.60       | 39.49             | 43.84                                                                                              | 69.43            | 37.39          | 52.15                                          | 67.42                        | 48.79                        | 96.65                 | 43.30          | 37.08                         | 90.69                 | 62.42          | 100.00         | 74.01    |
| Score                   |       | 0.50           | 0.22   | -0.09            | -0.12          | 0.50               | 0.50                            | 1.50                       | 0.50                        | -0.21              | 0.75    | 0.75        | -0.10             | 1.50                                                                                               | -0.18            | 1.50           | 1.50                                           | 0.50                         | 1.50                         | 1.50                  | -0.11          | 1.50                          | 1.50                  | 1.50           | 1.50           | 1.50     |
| Ion-type                |       | a <sub>1</sub> | LI     |                  |                | a <sub>2</sub>     | SL-28                           | y <sub>1</sub>             | b <sub>2</sub>              |                    | SL      | LE          |                   | y <sub>2</sub>                                                                                     | y <sup>++5</sup> | y <sub>3</sub> | y <sub>6</sub> -H <sub>2</sub> O <sup>+2</sup> | y <sub>6</sub> <sup>+2</sup> | y <sub>9</sub> <sup>+2</sup> |                       | y <sub>4</sub> | y <sub>11</sub> <sup>+2</sup> | y <sub>5</sub>        | y <sub>7</sub> | y <sub>8</sub> |          |
| Delta ppm               |       | -5.2           | -4.9   |                  |                | -11.3              | -10.7                           | -14.0                      | -7.0                        |                    | -3.3    | 1.1         |                   | -3.1                                                                                               |                  | 23.4           | -3.6                                           | 1.3                          | 11.9                         | -4.6                  |                | -4.8                          | -2.3                  | 3.9            | -2.8           | -1.0     |

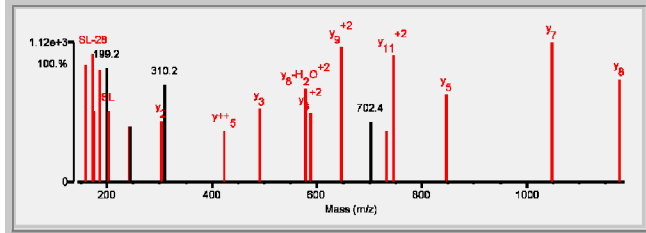

Reset

Back

Grow

Shrink

Labels



Result Summary

| Rank | Score | SPI (%) | BCS | # Unmatched Ions | Variable sites | Sequence                          | MH <sup>+</sup> Calculated (Da) | MH <sup>+</sup> Error (Da) | MH <sup>+</sup> Error (ppm) | Protein MW/pl (Da) | Species | Accession # | Protein Name                                                        |
|------|-------|---------|-----|------------------|----------------|-----------------------------------|---------------------------------|----------------------------|-----------------------------|--------------------|---------|-------------|---------------------------------------------------------------------|
| 1    | 15.26 | 77.7    | 10  | 6/25             | K122k          | (R)TPALVFEHVNNTDFkQLYQLTLDYDIR(F) | 3241.6164                       | 114.0726                   | 8.8                         | 45143.87.29        | HUMAN   | P68400      | Casein kinase II subunit alpha OS=Homo sapiens GN=CSNK2A1 PE=1 SV=1 |

Detailed Results

| Rank                    | Score | SPI (%) | BCS    | # Unmatched Ions | Variable sites | Sequence                          | MH <sup>+</sup> Calculated (Da) | MH <sup>+</sup> Error (Da) | MH <sup>+</sup> Error (ppm) | Protein MW/pl (Da) | Species | Accession # | MS-Digest Index #     | Protein Name                                                        |         |         |         |                       |                   |         |                       |         |         |                       |         |          |
|-------------------------|-------|---------|--------|------------------|----------------|-----------------------------------|---------------------------------|----------------------------|-----------------------------|--------------------|---------|-------------|-----------------------|---------------------------------------------------------------------|---------|---------|---------|-----------------------|-------------------|---------|-----------------------|---------|---------|-----------------------|---------|----------|
| 1                       | 15.26 | 77.7    | 10     | 6/25             | K122k          | (R)TPALVFEHVNNTDFkQLYQLTLDYDIR(F) | 3241.6164                       | 114.0726                   | 8.8                         | 45143.87.29        | HUMAN   | P68400      | 128017                | Casein kinase II subunit alpha OS=Homo sapiens GN=CSNK2A1 PE=1 SV=1 |         |         |         |                       |                   |         |                       |         |         |                       |         |          |
| Fragment-ion (m/z)      |       | 70.063  | 84.080 | 86.095           | 110.067        | 120.080                           | 136.071                         | 169.096                    | 171.110                     | 199.104            | 288.202 | 414.178     | 554.791 <sup>+2</sup> | 566.292                                                             | 681.334 | 719.977 | 744.056 | 762.888 <sup>+2</sup> | 782.380           | 793.406 | 814.656 <sup>+2</sup> | 877.374 | 895.497 | 991.814 <sup>+3</sup> | 996.501 | 1287.562 |
| Frac. Inten. (% of TIC) |       | 0.01    | 0.32   | 0.32             | 0.11           | 0.10                              | 0.12                            | 3.42                       | 3.69                        | 3.64               | 13.46   | 3.09        | 3.28                  | 6.71                                                                | 4.10    | 4.19    | 3.30    | 3.38                  | 12.04             | 5.39    | 4.31                  | 3.03    | 5.53    | 4.59                  | 7.75    | 4.11     |
| Rel. Inten. (% of BP)   |       | 0.04    | 2.39   | 2.39             | 0.81           | 0.77                              | 0.92                            | 25.40                      | 27.39                       | 27.06              | 100.00  | 22.99       | 24.35                 | 49.83                                                               | 30.47   | 31.12   | 24.55   | 25.12                 | 89.48             | 40.02   | 32.04                 | 22.49   | 41.07   | 34.13                 | 57.59   | 30.55    |
| Score                   |       | 0.20    | 0.50   | 0.22             | 1.00           | 1.00                              | 1.00                            | 0.75                       | 0.50                        | 0.50               | 1.50    | 0.75        | 0.50                  | 1.50                                                                | 1.50    | -0.31   | -0.25   | -0.25                 | 1.50              | 0.50    | -0.32                 | -0.22   | 0.50    | 1.50                  | 1.50    | -0.31    |
| Ion-type                |       | PR      | KQ     | LI               | H              | F                                 | Y                               | PA                         | Q2                          | Q2                 | Q2      | Q2          | b10 <sup>-2</sup>     | y4                                                                  | y5      |         |         | y6                    | b <sup>++14</sup> |         |                       |         | b6      | y23 <sup>+3</sup>     | y6      |          |
| Delta ppm               |       | -28.9   | -14.0  | -15.4            | -38.8          | -9.0                              | -38.1                           | -13.3                      | -24.0                       | -22.2              | -5.3    | -1.2        | -5.0                  | -1.9                                                                | 19.9    |         |         | 15.6                  | 24.4              |         |                       |         | 32.5    | -3.1                  | 1.2     |          |

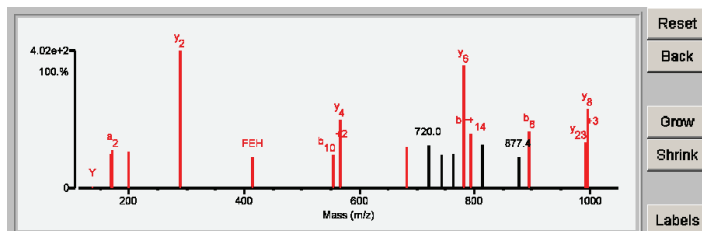

Result Summary

| Rank | Score | SPI (%) | BCS | # Unmatched Ions | Variable sites | Sequence                    | MH <sup>+</sup> Calculated (Da) | MH <sup>+</sup> Error (Da) | MH <sup>+</sup> Error (ppm) | Protein MW/pl (Da) | Species | Accession # | Protein Name                                       |
|------|-------|---------|-----|------------------|----------------|-----------------------------|---------------------------------|----------------------------|-----------------------------|--------------------|---------|-------------|----------------------------------------------------|
| 1    | 23.73 | 91.0    | 12  | 4/25             | K170k          | (K)LLNDEDQVVVNKAAMVHQLSK(K) | 2450.3072                       | 114.0674                   | 9.5                         | 85497.1/5.53       | HUMAN   | P35222      | Catenin beta-1 OS=Homo sapiens GN=CTNNB1 PE=1 SV=1 |
| 2    | 14.26 | 75.8    | 6   | 10/25            | K180k          | (K)LLNDEDQVVVNKAAMVHQLSK(K) | 2450.3072                       | 114.0674                   | 9.5                         | 85497.1/5.53       | HUMAN   | P35222      | Catenin beta-1 OS=Homo sapiens GN=CTNNB1 PE=1 SV=1 |

Detailed Results

| Rank                   | Score  | SPI (%) | BCS    | # Unmatched Ions | Variable sites | Sequence                                                                  | MH <sup>+</sup> Calculated (Da) | MH <sup>+</sup> Error (Da) | MH <sup>+</sup> Error (ppm) | Protein MW/pl (Da) | Species | Accession #           | MS-Digest Index # | Protein Name                                       |         |                       |                       |                       |                       |         |                       |         |                       |          |          |
|------------------------|--------|---------|--------|------------------|----------------|---------------------------------------------------------------------------|---------------------------------|----------------------------|-----------------------------|--------------------|---------|-----------------------|-------------------|----------------------------------------------------|---------|-----------------------|-----------------------|-----------------------|-----------------------|---------|-----------------------|---------|-----------------------|----------|----------|
| 1                      | 23.73  | 91.0    | 12     | 4/25             | K170k          | (K) L L N D E / D Q / V / V / V / N K / A / A / V / M / V / H Q L S K (K) | 2450.3072                       | 114.0674                   | 9.5                         | 85497.1/5.53       | HUMAN   | P35222                | 130857            | Catenin beta-1 OS=Homo sapiens GN=CTNNB1 PE=1 SV=1 |         |                       |                       |                       |                       |         |                       |         |                       |          |          |
| Fragment-ion (m/z)     | 72.080 | 84.044  | 84.080 | 86.096           | 88.040         | 110.070                                                                   | 199.180                         | 227.174                    | 230.075                     | 359.118            | 454.207 | 546.282 <sup>+3</sup> | 584.213           | 612.345                                            | 711.410 | 720.398 <sup>+2</sup> | 769.932 <sup>+2</sup> | 780.048 <sup>+3</sup> | 819.460 <sup>+2</sup> | 842.458 | 868.990 <sup>+2</sup> | 941.513 | 990.551 <sup>+2</sup> | 1012.567 | 1083.583 |
| Frac. Inten.(% of TIC) | 0.37   | 0.07    | 0.23   | 32.70            | 2.22           | 0.06                                                                      | 13.64                           | 3.09                       | 3.59                        | 2.23               | 2.87    | 2.03                  | 1.87              | 2.76                                               | 2.17    | 4.19                  | 3.50                  | 3.24                  | 4.25                  | 2.76    | 2.02                  | 2.34    | 2.62                  | 2.72     | 2.45     |
| Rel. Inten.(% of BP)   | 1.13   | 0.21    | 0.71   | 100.00           | 6.80           | 0.19                                                                      | 41.72                           | 9.44                       | 10.97                       | 6.83               | 8.77    | 6.21                  | 5.72              | 8.44                                               | 6.63    | 12.82                 | 10.71                 | 9.92                  | 13.01                 | 8.44    | 6.17                  | 7.16    | 8.00                  | 8.32     | 7.50     |
| Score                  | 0.50   | 1.00    | 0.50   | 0.50             | -0.07          | 1.00                                                                      | 0.50                            | 0.50                       | 0.75                        | 0.75               | -0.09   | -0.06                 | -0.06             | 1.50                                               | 1.50    | 1.50                  | 1.50                  | 1.50                  | 1.50                  | 1.50    | 1.50                  | 1.50    | 1.50                  | 1.50     | 1.50     |
| Ion-type               | V      | E       | KQ     | a1               | H              | a2                                                                        | b2                              | ND                         | NDE                         |                    |         |                       |                   | y5                                                 | y6      | y12 <sup>+2</sup>     | y13 <sup>+2</sup>     | y20 <sup>+3</sup>     | y14 <sup>+2</sup>     | y7      | y15 <sup>+2</sup>     | y8      | y17 <sup>+2</sup>     | y9       | y10      |
| Delta ppm              | -14.9  | 1.3     | -4.5   | -15.4            | -14.3          | -7.5                                                                      | -9.7                            | -13.7                      | -8.5                        |                    |         |                       |                   | -2.4                                               | -7.3    | 6.4                   | 6.3                   | -22.2                 | -1.9                  | 3.5     | -6.5                  | -10.9   | 12.4                  | 6.4      | -14.1    |

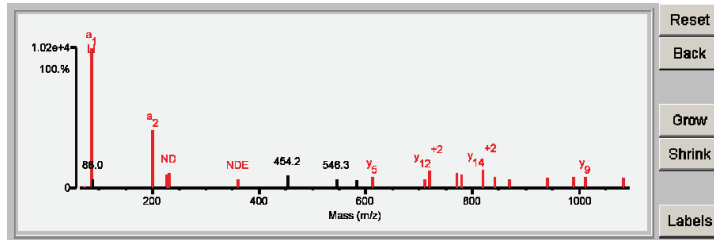

Reset  
Back  
Grow  
Shrink  
Labels



Result Summary

| Rank | Score | SPI (%) | BCS | # Unmatched Ions | Variable sites | Sequence                 | MH <sup>+</sup> Calculated (Da) | MH <sup>+</sup> Error (Da) | MH <sup>+</sup> Error (ppm) | Protein MW/pi (Da) | Species | Accession # | Protein Name                                       |
|------|-------|---------|-----|------------------|----------------|--------------------------|---------------------------------|----------------------------|-----------------------------|--------------------|---------|-------------|----------------------------------------------------|
| 1    | 10.37 | 64.8    | 9   | 11/25            | K435k          | (K)NKKMMVQCQVGGIEALVR(T) | 1804.9230                       | 114.0710                   | 14.6                        | 85497.1/5.53       | HUMAN   | P35222      | Catenin beta-1 OS=Homo sapiens GN=CTNNB1 PE=1 SV=1 |

Detailed Results

| Rank                   | Score  | SPI (%) | BCS    | # Unmatched Ions | Variable sites | Sequence                 | MH <sup>+</sup> Calculated (Da) | MH <sup>+</sup> Error (Da) | MH <sup>+</sup> Error (ppm) | Protein MW/pi (Da) | Species | Accession # | MS-Digest Index # | Protein Name                                       |         |         |                       |         |                       |                       |         |         |         |         |          |
|------------------------|--------|---------|--------|------------------|----------------|--------------------------|---------------------------------|----------------------------|-----------------------------|--------------------|---------|-------------|-------------------|----------------------------------------------------|---------|---------|-----------------------|---------|-----------------------|-----------------------|---------|---------|---------|---------|----------|
| 1                      | 10.37  | 64.8    | 9      | 11/25            | K435k          | (K)NKKMMVQCQVGGIEALVR(T) | 1804.9230                       | 114.0710                   | 14.6                        | 85497.1/5.53       | HUMAN   | P35222      | 130857            | Catenin beta-1 OS=Homo sapiens GN=CTNNB1 PE=1 SV=1 |         |         |                       |         |                       |                       |         |         |         |         |          |
| Fragment-ion (m/z)     | 70.065 | 72.080  | 84.080 | 86.096           | 104.050        | 133.045                  | 136.075                         | 141.100                    | 159.091                     | 175.116            | 187.144 | 215.145     | 237.119           | 357.184                                            | 410.223 | 458.296 | 466.710 <sup>+2</sup> | 488.222 | 503.730 <sup>+2</sup> | 530.277 <sup>+2</sup> | 587.344 | 718.339 | 757.451 | 814.472 | 1006.444 |
| Frac. Inten.(% of TIC) | 0.00   | 0.59    | 0.22   | 0.44             | 2.88           | 2.76                     | 3.98                            | 2.93                       | 3.75                        | 3.14               | 3.80    | 2.86        | 2.91              | 3.16                                               | 3.62    | 4.04    | 3.16                  | 2.46    | 2.73                  | 2.56                  | 7.01    | 3.14    | 6.65    | 27.12   | 4.09     |
| Rel. Inten.(% of BP)   | 0.01   | 2.19    | 0.83   | 1.62             | 10.62          | 10.17                    | 14.67                           | 10.79                      | 13.84                       | 11.59              | 14.01   | 10.56       | 10.72             | 11.64                                              | 13.34   | 14.90   | 11.65                 | 9.07    | 10.06                 | 9.45                  | 25.84   | 11.57   | 24.53   | 100.00  | 15.07    |
| Score                  | 0.20   | 0.50    | 0.50   | 0.22             | -0.11          | -0.10                    | -0.15                           | -0.11                      | -0.14                       | 1.50               | -0.14   | -0.11       | -0.11             | 0.75                                               | -0.13   | 1.50    | -0.12                 | 0.50    | 0.50                  | -0.09                 | 1.50    | 0.50    | 1.50    | 1.50    | 0.50     |
| Ion-type               | PR     | V       | KQ     | LI               |                |                          |                                 |                            |                             | y1                 |         |             |                   | b2                                                 |         | y4      |                       | b3      |                       | b7 <sup>+2</sup>      | y5      | b5      | y7      | y8      | b7       |
| Delta ppm              | -0.4   | -14.9   | -12.8  | -9.6             |                |                          |                                 |                            |                             | -16.9              |         |             |                   | -14.3                                              |         | -26.5   |                       | -16.1   |                       | 25.2                  | -12.3   | 0.3     | -7.9    | -8.0    | 15.9     |

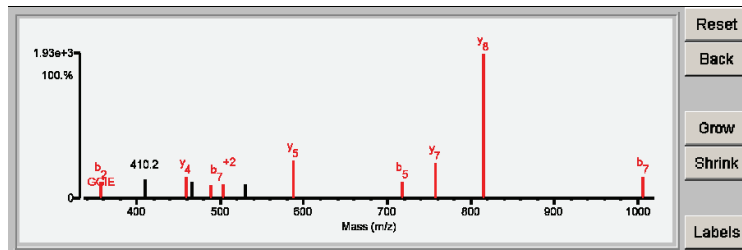

Reset  
Back  
Grow  
Shrink  
Labels

Result Summary

| Rank | Score | SPI (%) | BCS | # Unmatched Ions | # Variable sites | Sequence                  | MH <sup>+</sup> Calculated (Da) | MH <sup>+</sup> Error (Da) | MH <sup>+</sup> Error (ppm) | Protein MW/pl (Da) | Species | Accession # | Protein Name                                       |
|------|-------|---------|-----|------------------|------------------|---------------------------|---------------------------------|----------------------------|-----------------------------|--------------------|---------|-------------|----------------------------------------------------|
| 1    | 12.75 | 72.0    | 7   | 8/25             | K508k            | (K)LLHPPSHWPLIKATVGLIR(N) | 2148.2804                       | 114.0653                   | 9.9                         | 85497.1/5.53       | HUMAN   | P35222      | Catenin beta-1 OS=Homo sapiens GN=CTNNB1 PE=1 SV=1 |

Detailed Results

| Rank | Score | SPI (%) | BCS | # Unmatched Ions | # Variable sites | Sequence                                          | MH <sup>+</sup> Calculated (Da) | MH <sup>+</sup> Error (Da) | MH <sup>+</sup> Error (ppm) | Protein MW/pl (Da) | Species | Accession # | MS-Digest Index # | Protein Name                                       |
|------|-------|---------|-----|------------------|------------------|---------------------------------------------------|---------------------------------|----------------------------|-----------------------------|--------------------|---------|-------------|-------------------|----------------------------------------------------|
| 1    | 12.75 | 72.0    | 7   | 8/25             | K508k            | (K) L L H P P S H W P L I K A / T V G L I / R (N) | 2148.2804                       | 114.0653                   | 9.9                         | 85497.1/5.53       | HUMAN   | P35222      | 130857            | Catenin beta-1 OS=Homo sapiens GN=CTNNB1 PE=1 SV=1 |

  

| Fragment-Ion (m/z)      | 70.064 | 72.079 | 84.079 | 86.095 | 110.070 | 120.080 | 129.100 | 159.089 | 160.091 | 173.128 | 175.118 | 183.146 | 199.183 | 211.139 | 346.228 | 364.233 | 419.207 | 458.308 | 471.268 | 476.745 <sup>+2</sup> | 589.822 <sup>+2</sup> | 658.423 | 729.464 | 733.906 <sup>+2</sup> | 782.432 |
|-------------------------|--------|--------|--------|--------|---------|---------|---------|---------|---------|---------|---------|---------|---------|---------|---------|---------|---------|---------|---------|-----------------------|-----------------------|---------|---------|-----------------------|---------|
| Frac. Inten. (% of TIC) | 0.01   | 0.13   | 10.69  | 16.95  | 0.45    | 1.99    | 0.06    | 0.36    | 2.38    | 3.34    | 5.67    | 3.83    | 2.48    | 3.14    | 2.77    | 8.51    | 3.12    | 11.45   | 2.17    | 1.97                  | 2.57                  | 6.13    | 4.59    | 2.63                  | 2.58    |
| Rel. Inten. (% of BP)   | 0.05   | 0.74   | 63.08  | 100.00 | 2.68    | 11.76   | 0.35    | 2.13    | 14.07   | 19.72   | 33.48   | 22.60   | 14.64   | 18.54   | 16.35   | 50.22   | 18.41   | 67.55   | 12.82   | 11.63                 | 15.14                 | 36.18   | 27.06   | 15.51                 | 15.22   |
| Score                   | 0.20   | 0.50   | -0.63  | 0.50   | 1.00    | -0.12   | 0.20    | 2.00    | -0.14   | -0.20   | 1.50    | 0.50    | 0.50    | 0.75    | -0.16   | 0.50    | 0.75    | 1.50    | -0.13   | -0.12                 | 0.50                  | 1.50    | 1.50    | -0.16                 | 0.50    |
| Ion-type                | PR     | V      |        | a1     | H       | RKQ     | W       |         |         |         | y1      | PL-28   | a2      | PL      | b3      | PPSH    | y4      |         |         |                       | b10 <sup>+2</sup>     | y6      | y7      |                       | b7      |
| Delta ppm               | -14.6  | -23.2  |        | -25.8  | 0.50    | -8.8    | -15.0   | -14.3   |         |         | -3.2    | -26.1   | 9.1     | -29.8   | -8.0    | 4.0     | -1.2    |         |         |                       | -10.3                 | -2.3    | 2.5     |                       | 0.5     |

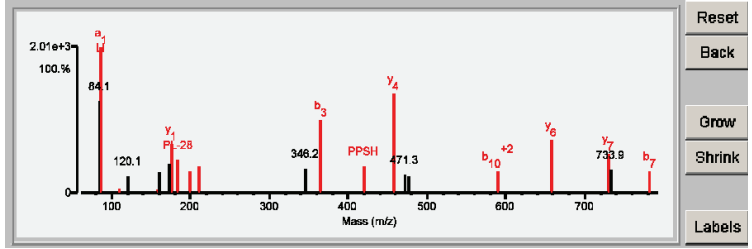

Reset  
Back  
Grow  
Shrink  
Labels

Result Summary

| Rank | Score | SPI (%) | BCS | # Unmatched Ions | Variable sites | Sequence          | MH <sup>+</sup> Calculated (Da) | MH <sup>+</sup> Error (Da) | MH <sup>+</sup> Error (ppm) | Protein MW/pl (Da) | Species | Accession # | Protein Name                                                                            |
|------|-------|---------|-----|------------------|----------------|-------------------|---------------------------------|----------------------------|-----------------------------|--------------------|---------|-------------|-----------------------------------------------------------------------------------------|
| 1    | 11.33 | 65.2    | 4   | 13/25            | K220k          | (K)DYYPFGQKVR(A)  | 1109.5738                       | 114.0569                   | 11.4                        | 42099.3/7.16       | HUMAN   | P56202      | Cathepsin W OS=Homo sapiens GN=CTSW PE=1 SV=1                                           |
| 2    | 6.22  | 54.2    | 2   | 16/25            | M353m          | (R)mNKNFERLR(S)   | 1207.6364                       | 15.9943                    | -0.5                        | 161737.3/8.78      | HUMAN   | Q5JU85      | IQ motif and SEC7 domain-containing protein 2 OS=Homo sapiens GN=IQSEC2 PE=2 SV=1       |
| 3    | 5.71  | 61.4    | 1   | 15/25            | None           | (K)FLPRVGYTDR(G)  | 1223.6531                       | -0.0224                    | -18.3                       | 64370.3/6.40       | HUMAN   | RP08243     | REVERSE Asparagine synthetase [glutamine-hydrolyzing] OS=Homo sapiens GN=ASNS PE=1 SV=4 |
| 4    | 3.66  | 52.3    | 1   | 18/25            | None           | (K)KPFDYQALNK(Y)  | 1223.6419                       | -0.0112                    | -9.1                        | 479394.8/5.01      | HUMAN   | Q9NYQ8      | Protocadherin Fat 2 OS=Homo sapiens GN=FAT2 PE=1 SV=1                                   |
| 5    | 3.39  | 50.1    | 2   | 20/25            | M214m          | (R)mLDGLVIFDGK(T) | 1207.6391                       | 15.9916                    | -2.7                        | 126968.6/5.14      | HUMAN   | RQ16531     | REVERSE DNA damage-binding protein 1 OS=Homo sapiens GN=DDB1 PE=1 SV=1                  |

Detailed Results

| Rank | Score | SPI (%) | BCS | # Unmatched Ions | Variable sites | Sequence                          | MH <sup>+</sup> Calculated (Da) | MH <sup>+</sup> Error (Da) | MH <sup>+</sup> Error (ppm) | Protein MW/pl (Da) | Species | Accession # | MS-Digest Index # | Protein Name                                  |
|------|-------|---------|-----|------------------|----------------|-----------------------------------|---------------------------------|----------------------------|-----------------------------|--------------------|---------|-------------|-------------------|-----------------------------------------------|
| 1    | 11.33 | 65.2    | 4   | 13/25            | K220k          | (K) D Y / R / F Q / G k V / R (A) | 1109.5738                       | 114.0569                   | 11.4                        | 42099.3/7.16       | HUMAN   | P56202      | 81077             | Cathepsin W OS=Homo sapiens GN=CTSW PE=1 SV=1 |

  

| Fragment-ion (m/z)      | 70.065 | 71.070 | 120.080 | 127.085 | 155.081 | 158.095 | 175.122 | 203.117 | 204.119 | 251.120 | 252.126 | 274.161 | 279.117 | 287.171 | 302.147 | 345.189 | 373.183 | 465.244 | 473.262 <sup>+2</sup> | 556.304 | 573.335 | 644.375 | 791.437 | 848.463 | 945.516 |
|-------------------------|--------|--------|---------|---------|---------|---------|---------|---------|---------|---------|---------|---------|---------|---------|---------|---------|---------|---------|-----------------------|---------|---------|---------|---------|---------|---------|
| Frac. Inten. (% of TIC) | 0.01   | 0.89   | 0.11    | 1.60    | 4.13    | 0.72    | 1.20    | 8.14    | 1.03    | 3.51    | 1.17    | 0.75    | 1.09    | 0.92    | 4.15    | 2.86    | 2.94    | 0.82    | 30.99                 | 1.07    | 8.97    | 3.84    | 3.67    | 5.17    | 10.26   |
| Rel. Inten. (% of BP)   | 0.02   | 2.88   | 0.35    | 5.15    | 13.32   | 2.31    | 3.86    | 26.27   | 3.32    | 11.34   | 3.78    | 2.40    | 3.50    | 2.98    | 13.38   | 9.24    | 9.49    | 2.63    | 100.00                | 3.45    | 28.94   | 12.37   | 11.84   | 16.69   | 33.10   |
| Score                   | 0.20   | -0.03  | 1.00    | -0.05   | -0.13   | 0.50    | 1.50    | -0.26   | -0.03   | -0.11   | -0.04   | -0.02   | -0.04   | -0.13   | 0.50    | 0.75    | -0.03   | -0.03   | 1.50                  | 0.50    | 1.50    | -0.12   | -0.12   | 1.50    | 1.50    |
| Ion-type                | PR     | F      |         |         |         | y1-NH3  | y1      |         |         |         |         |         |         | y4      | PFQ-28  | PFQ     | PFQ     |         | y7 <sup>+2</sup>      | y4-NH3  | y4      |         | y6      | y7      |         |
| Delta ppm               | -1.8   |        | -6.5    |         |         | 15.8    | 17.4    |         |         |         |         |         |         | -19.8   | -12.8   | -14.3   |         |         | -9.5                  | -28.3   | -20.3   |         | -12.9   | -11.2   |         |

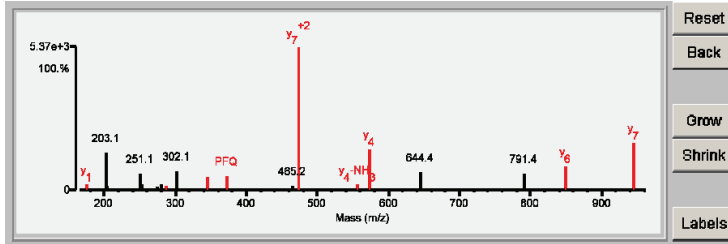

Reset

Back

Grow

Shrink

Labels

Result Summary

| Rank | Score | SPI (%) | BCS | # Unmatched Ions | Variable sites | Sequence                    | MH <sup>+</sup> Calculated (Da) | MH <sup>+</sup> Error (Da) | MH <sup>+</sup> Error (ppm) | Protein MW/pI (Da) | Species | Accession #             | Protein Name                                                                       |
|------|-------|---------|-----|------------------|----------------|-----------------------------|---------------------------------|----------------------------|-----------------------------|--------------------|---------|-------------------------|------------------------------------------------------------------------------------|
| 1    | 13.78 | 69.5    | 4   | 6/24             | K166k          | (R)EQFYHSCKQYGITGENV(R)(G)  | 2216.0189                       | 114.0668                   | 10.3                        | 56921.0/4.68       | HUMAN   | <a href="#">Q96JB5</a>  | CDK5 regulatory subunit-associated protein 3 OS=Homo sapiens GN=CDK5RAP3 PE=1 SV=2 |
| 2    | 6.66  | 54.2    | 2   | 12/24            | None           | (R)LAGGESSNESGRRRIGPSPCK(A) | 2330.1153                       | -0.0296                    | -12.7                       | 128109.8/6.02      | HUMAN   | <a href="#">R015068</a> | REVERSE Guanine nucleotide exchange factor DBS OS=Homo sapiens GN=MCF2L PE=1 SV=2  |

Detailed Results

| Rank | Score | SPI (%) | BCS | # Unmatched Ions | Variable sites | Sequence                   | MH <sup>+</sup> Calculated (Da) | MH <sup>+</sup> Error (Da) | MH <sup>+</sup> Error (ppm) | Protein MW/pI (Da) | Species | Accession #            | MS-Digest Index #      | Protein Name                                                                       |
|------|-------|---------|-----|------------------|----------------|----------------------------|---------------------------------|----------------------------|-----------------------------|--------------------|---------|------------------------|------------------------|------------------------------------------------------------------------------------|
| 1    | 13.78 | 69.5    | 4   | 6/24             | K166k          | (R)EQFYHSCKQYGITGENV(R)(G) | 2216.0189                       | 114.0668                   | 10.3                        | 56921.0/4.68       | HUMAN   | <a href="#">Q96JB5</a> | <a href="#">102879</a> | CDK5 regulatory subunit-associated protein 3 OS=Homo sapiens GN=CDK5RAP3 PE=1 SV=2 |

  

| Fragment-ion (m/z)      | 72.080 | 74.060 | 84.043 | 84.079 | 86.095 | 87.053 | 87.095 | 102.053 | 110.071 | 120.081 | 129.066 | 136.073 | 159.073 | 175.117             | 240.099 | 314.171          | 338.172 <sup>+2</sup> | 387.163 | 517.273 | 657.299 | 675.338 | 706.787 <sup>+2</sup> | 754.339 | 845.428 |
|-------------------------|--------|--------|--------|--------|--------|--------|--------|---------|---------|---------|---------|---------|---------|---------------------|---------|------------------|-----------------------|---------|---------|---------|---------|-----------------------|---------|---------|
| Frac. Inten. (% of TIC) | 0.15   | 8.39   | 0.33   | 0.46   | 1.00   | 0.16   | 4.14   | 0.29    | 0.21    | 0.25    | 0.30    | 0.47    | 3.82    | 3.95                | 5.82    | 4.41             | 3.76                  | 10.37   | 7.77    | 4.21    | 24.88   | 3.93                  | 5.41    | 5.52    |
| Rel. Inten. (% of BP)   | 0.59   | 33.72  | 1.32   | 1.85   | 4.04   | 0.65   | 16.62  | 1.15    | 0.83    | 0.99    | 1.20    | 1.89    | 15.37   | 15.88               | 23.40   | 17.72            | 15.09                 | 41.67   | 31.23   | 16.94   | 100.00  | 15.77                 | 21.75   | 22.19   |
| Score                   | 0.50   | -0.34  | 1.00   | 0.50   | 0.22   | 0.33   | -0.17  | 1.00    | 1.00    | 1.00    | 0.20    | 1.00    | 0.75    | 1.50                | 0.25    | -0.18            | 1.50                  | 0.25    | 1.50    | -0.17   | 1.50    | -0.16                 | -0.22   | 1.50    |
| Ion-type                | V      | E      | E      | KQ     | LI     | NR     | a1     | H       | F       | QKR     | Y       | TG      | y1      | b2-H <sub>2</sub> O |         | y6 <sup>+2</sup> | b3-H <sub>2</sub> O   | y4      | y6      |         | y6      |                       | y8      |         |
| Delta ppm               | -6.6   |        | -11.8  | -19.9  | -11.9  | -30.9  |        | -32.8   | 1.1     | -1.5    | 2.7     | -19.8   | -25.9   | -9.4                | -0.3    |                  | -7.0                  | -11.9   | 1.0     |         | -6.0    |                       | -23.2   |         |

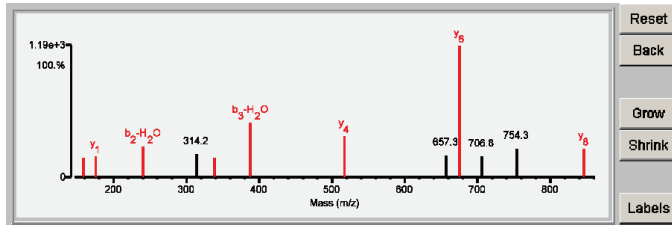

Result Summary

| Rank | Score | SPI (%) | BCS | # Unmatched Ions | Variable sites | Sequence            | MH <sup>+</sup> Calculated (Da) | MH <sup>+</sup> Error (Da) | MH <sup>+</sup> Error (ppm) | Protein MW/pi (Da) | Species | Accession #            | Protein Name                                                    |
|------|-------|---------|-----|------------------|----------------|---------------------|---------------------------------|----------------------------|-----------------------------|--------------------|---------|------------------------|-----------------------------------------------------------------|
| 1    | 13.07 | 80.8    | 7   | 7/25             | K103k          | (R)GFSIPECQKLLPK(A) | 1516.8192                       | 114.0557                   | 7.9                         | 51712.7/8.45       | HUMAN   | <a href="#">O75390</a> | Citrate synthase, mitochondrial OS=Homo sapiens GN=CS PE=1 SV=2 |
| 2    | 7.06  | 62.6    | 4   | 11/25            | K107k          | (R)GFSIPECQKLLPK(A) | 1516.8192                       | 114.0557                   | 7.9                         | 51712.7/8.45       | HUMAN   | <a href="#">O75390</a> | Citrate synthase, mitochondrial OS=Homo sapiens GN=CS PE=1 SV=2 |

Detailed Results

| Rank                                                                                                                                                                                                                                                                                                                                                                                                                                                                                                                                                                                                                                                                                                                                                                                                                                                                                                                                                                                                                                                                                                                                                                                                                                                                                                                                                                                                                                                                                                                                                                                                                                                                                                                                                                                                                                                                                                                                                                                                                                                                                                                                                                                                                                                                                                                                                                                                                                                                                   | Score  | SPI (%) | BCS    | # Unmatched Ions | Variable sites | Sequence                           | MH <sup>+</sup> Calculated (Da) | MH <sup>+</sup> Error (Da) | MH <sup>+</sup> Error (ppm) | Protein MW/pi (Da) | Species | Accession #            | MS-Digest Index #      | Protein Name                                                    |                    |         |         |         |         |         |         |                       |         |         |          |         |         |         |         |         |         |         |         |         |         |         |                       |         |         |          |                         |      |      |      |      |      |      |      |      |       |      |      |      |      |      |       |      |      |      |      |      |      |       |      |      |      |                       |      |      |      |      |      |      |       |       |       |      |      |       |       |       |       |      |       |       |      |      |      |        |      |       |      |       |      |      |      |      |       |      |      |       |      |       |      |      |       |      |      |       |      |      |      |       |      |      |       |      |      |          |    |    |    |   |  |     |    |  |    |  |       |    |  |    |    |  |        |    |    |  |     |                  |        |    |           |      |      |       |      |  |      |       |  |      |  |      |      |  |     |     |  |     |      |      |  |      |     |       |     |
|----------------------------------------------------------------------------------------------------------------------------------------------------------------------------------------------------------------------------------------------------------------------------------------------------------------------------------------------------------------------------------------------------------------------------------------------------------------------------------------------------------------------------------------------------------------------------------------------------------------------------------------------------------------------------------------------------------------------------------------------------------------------------------------------------------------------------------------------------------------------------------------------------------------------------------------------------------------------------------------------------------------------------------------------------------------------------------------------------------------------------------------------------------------------------------------------------------------------------------------------------------------------------------------------------------------------------------------------------------------------------------------------------------------------------------------------------------------------------------------------------------------------------------------------------------------------------------------------------------------------------------------------------------------------------------------------------------------------------------------------------------------------------------------------------------------------------------------------------------------------------------------------------------------------------------------------------------------------------------------------------------------------------------------------------------------------------------------------------------------------------------------------------------------------------------------------------------------------------------------------------------------------------------------------------------------------------------------------------------------------------------------------------------------------------------------------------------------------------------------|--------|---------|--------|------------------|----------------|------------------------------------|---------------------------------|----------------------------|-----------------------------|--------------------|---------|------------------------|------------------------|-----------------------------------------------------------------|--------------------|---------|---------|---------|---------|---------|---------|-----------------------|---------|---------|----------|---------|---------|---------|---------|---------|---------|---------|---------|---------|---------|---------|-----------------------|---------|---------|----------|-------------------------|------|------|------|------|------|------|------|------|-------|------|------|------|------|------|-------|------|------|------|------|------|------|-------|------|------|------|-----------------------|------|------|------|------|------|------|-------|-------|-------|------|------|-------|-------|-------|-------|------|-------|-------|------|------|------|--------|------|-------|------|-------|------|------|------|------|-------|------|------|-------|------|-------|------|------|-------|------|------|-------|------|------|------|-------|------|------|-------|------|------|----------|----|----|----|---|--|-----|----|--|----|--|-------|----|--|----|----|--|--------|----|----|--|-----|------------------|--------|----|-----------|------|------|-------|------|--|------|-------|--|------|--|------|------|--|-----|-----|--|-----|------|------|--|------|-----|-------|-----|
| 1                                                                                                                                                                                                                                                                                                                                                                                                                                                                                                                                                                                                                                                                                                                                                                                                                                                                                                                                                                                                                                                                                                                                                                                                                                                                                                                                                                                                                                                                                                                                                                                                                                                                                                                                                                                                                                                                                                                                                                                                                                                                                                                                                                                                                                                                                                                                                                                                                                                                                      | 13.07  | 80.8    | 7      | 7/25             | K103k          | (R)G F P S I P E C Q K L L P K (A) | 1516.8192                       | 114.0557                   | 7.9                         | 51712.7/8.45       | HUMAN   | <a href="#">O75390</a> | <a href="#">101769</a> | Citrate synthase, mitochondrial OS=Homo sapiens GN=CS PE=1 SV=2 |                    |         |         |         |         |         |         |                       |         |         |          |         |         |         |         |         |         |         |         |         |         |         |                       |         |         |          |                         |      |      |      |      |      |      |      |      |       |      |      |      |      |      |       |      |      |      |      |      |      |       |      |      |      |                       |      |      |      |      |      |      |       |       |       |      |      |       |       |       |       |      |       |       |      |      |      |        |      |       |      |       |      |      |      |      |       |      |      |       |      |       |      |      |       |      |      |       |      |      |      |       |      |      |       |      |      |          |    |    |    |   |  |     |    |  |    |  |       |    |  |    |    |  |        |    |    |  |     |                  |        |    |           |      |      |       |      |  |      |       |  |      |  |      |      |  |     |     |  |     |      |      |  |      |     |       |     |
| <table border="1"> <thead> <tr> <th>Fragment-ion (m/z)</th> <th>70.065</th> <th>84.080</th> <th>86.096</th> <th>120.080</th> <th>121.084</th> <th>129.102</th> <th>147.111</th> <th>173.128</th> <th>177.102</th> <th>178.104</th> <th>199.108</th> <th>205.096</th> <th>226.155</th> <th>227.105</th> <th>244.166</th> <th>245.168</th> <th>274.120</th> <th>292.130</th> <th>357.249</th> <th>359.209</th> <th>469.314</th> <th>613.834<sup>+2</sup></th> <th>870.418</th> <th>983.505</th> <th>1000.563</th> </tr> </thead> <tbody> <tr> <td>Frac. Inten. (% of TIC)</td> <td>0.01</td> <td>0.18</td> <td>0.22</td> <td>0.66</td> <td>1.99</td> <td>0.10</td> <td>2.67</td> <td>6.36</td> <td>17.42</td> <td>2.13</td> <td>1.85</td> <td>3.50</td> <td>2.57</td> <td>2.67</td> <td>12.01</td> <td>2.17</td> <td>3.55</td> <td>2.77</td> <td>1.77</td> <td>2.19</td> <td>1.80</td> <td>23.95</td> <td>1.80</td> <td>4.12</td> <td>1.55</td> </tr> <tr> <td>Rel. Inten. (% of BP)</td> <td>0.04</td> <td>0.73</td> <td>0.90</td> <td>2.75</td> <td>8.30</td> <td>0.43</td> <td>11.13</td> <td>26.57</td> <td>72.75</td> <td>8.89</td> <td>7.74</td> <td>14.63</td> <td>10.73</td> <td>11.15</td> <td>50.15</td> <td>9.07</td> <td>14.82</td> <td>11.58</td> <td>7.38</td> <td>9.14</td> <td>7.51</td> <td>100.00</td> <td>7.50</td> <td>17.18</td> <td>6.49</td> </tr> <tr> <td>Score</td> <td>0.20</td> <td>0.50</td> <td>0.22</td> <td>1.00</td> <td>-0.08</td> <td>0.20</td> <td>1.50</td> <td>-0.27</td> <td>0.50</td> <td>-0.09</td> <td>0.50</td> <td>0.50</td> <td>-0.11</td> <td>0.75</td> <td>1.50</td> <td>-0.09</td> <td>0.25</td> <td>0.50</td> <td>1.50</td> <td>-0.09</td> <td>0.75</td> <td>1.50</td> <td>-0.07</td> <td>0.50</td> <td>1.50</td> </tr> <tr> <td>Ion-type</td> <td>PR</td> <td>KQ</td> <td>LI</td> <td>F</td> <td></td> <td>RKQ</td> <td>y1</td> <td></td> <td>a2</td> <td></td> <td>PE-28</td> <td>b2</td> <td></td> <td>PE</td> <td>y2</td> <td></td> <td>b3-H2O</td> <td>b3</td> <td>y3</td> <td></td> <td>kLL</td> <td>y9<sup>+2</sup></td> <td>y7-NH3</td> <td>y7</td> </tr> <tr> <td>Delta ppm</td> <td>-3.2</td> <td>-8.0</td> <td>-10.8</td> <td>-6.5</td> <td></td> <td>-5.0</td> <td>-10.9</td> <td></td> <td>-9.8</td> <td></td> <td>-3.1</td> <td>-8.5</td> <td></td> <td>4.3</td> <td>0.1</td> <td></td> <td>0.7</td> <td>-0.3</td> <td>-0.9</td> <td></td> <td>-0.6</td> <td>4.0</td> <td>-29.5</td> <td>1.9</td> </tr> </tbody> </table> |        |         |        |                  |                |                                    |                                 |                            |                             |                    |         |                        |                        |                                                                 | Fragment-ion (m/z) | 70.065  | 84.080  | 86.096  | 120.080 | 121.084 | 129.102 | 147.111               | 173.128 | 177.102 | 178.104  | 199.108 | 205.096 | 226.155 | 227.105 | 244.166 | 245.168 | 274.120 | 292.130 | 357.249 | 359.209 | 469.314 | 613.834 <sup>+2</sup> | 870.418 | 983.505 | 1000.563 | Frac. Inten. (% of TIC) | 0.01 | 0.18 | 0.22 | 0.66 | 1.99 | 0.10 | 2.67 | 6.36 | 17.42 | 2.13 | 1.85 | 3.50 | 2.57 | 2.67 | 12.01 | 2.17 | 3.55 | 2.77 | 1.77 | 2.19 | 1.80 | 23.95 | 1.80 | 4.12 | 1.55 | Rel. Inten. (% of BP) | 0.04 | 0.73 | 0.90 | 2.75 | 8.30 | 0.43 | 11.13 | 26.57 | 72.75 | 8.89 | 7.74 | 14.63 | 10.73 | 11.15 | 50.15 | 9.07 | 14.82 | 11.58 | 7.38 | 9.14 | 7.51 | 100.00 | 7.50 | 17.18 | 6.49 | Score | 0.20 | 0.50 | 0.22 | 1.00 | -0.08 | 0.20 | 1.50 | -0.27 | 0.50 | -0.09 | 0.50 | 0.50 | -0.11 | 0.75 | 1.50 | -0.09 | 0.25 | 0.50 | 1.50 | -0.09 | 0.75 | 1.50 | -0.07 | 0.50 | 1.50 | Ion-type | PR | KQ | LI | F |  | RKQ | y1 |  | a2 |  | PE-28 | b2 |  | PE | y2 |  | b3-H2O | b3 | y3 |  | kLL | y9 <sup>+2</sup> | y7-NH3 | y7 | Delta ppm | -3.2 | -8.0 | -10.8 | -6.5 |  | -5.0 | -10.9 |  | -9.8 |  | -3.1 | -8.5 |  | 4.3 | 0.1 |  | 0.7 | -0.3 | -0.9 |  | -0.6 | 4.0 | -29.5 | 1.9 |
| Fragment-ion (m/z)                                                                                                                                                                                                                                                                                                                                                                                                                                                                                                                                                                                                                                                                                                                                                                                                                                                                                                                                                                                                                                                                                                                                                                                                                                                                                                                                                                                                                                                                                                                                                                                                                                                                                                                                                                                                                                                                                                                                                                                                                                                                                                                                                                                                                                                                                                                                                                                                                                                                     | 70.065 | 84.080  | 86.096 | 120.080          | 121.084        | 129.102                            | 147.111                         | 173.128                    | 177.102                     | 178.104            | 199.108 | 205.096                | 226.155                | 227.105                                                         | 244.166            | 245.168 | 274.120 | 292.130 | 357.249 | 359.209 | 469.314 | 613.834 <sup>+2</sup> | 870.418 | 983.505 | 1000.563 |         |         |         |         |         |         |         |         |         |         |         |                       |         |         |          |                         |      |      |      |      |      |      |      |      |       |      |      |      |      |      |       |      |      |      |      |      |      |       |      |      |      |                       |      |      |      |      |      |      |       |       |       |      |      |       |       |       |       |      |       |       |      |      |      |        |      |       |      |       |      |      |      |      |       |      |      |       |      |       |      |      |       |      |      |       |      |      |      |       |      |      |       |      |      |          |    |    |    |   |  |     |    |  |    |  |       |    |  |    |    |  |        |    |    |  |     |                  |        |    |           |      |      |       |      |  |      |       |  |      |  |      |      |  |     |     |  |     |      |      |  |      |     |       |     |
| Frac. Inten. (% of TIC)                                                                                                                                                                                                                                                                                                                                                                                                                                                                                                                                                                                                                                                                                                                                                                                                                                                                                                                                                                                                                                                                                                                                                                                                                                                                                                                                                                                                                                                                                                                                                                                                                                                                                                                                                                                                                                                                                                                                                                                                                                                                                                                                                                                                                                                                                                                                                                                                                                                                | 0.01   | 0.18    | 0.22   | 0.66             | 1.99           | 0.10                               | 2.67                            | 6.36                       | 17.42                       | 2.13               | 1.85    | 3.50                   | 2.57                   | 2.67                                                            | 12.01              | 2.17    | 3.55    | 2.77    | 1.77    | 2.19    | 1.80    | 23.95                 | 1.80    | 4.12    | 1.55     |         |         |         |         |         |         |         |         |         |         |         |                       |         |         |          |                         |      |      |      |      |      |      |      |      |       |      |      |      |      |      |       |      |      |      |      |      |      |       |      |      |      |                       |      |      |      |      |      |      |       |       |       |      |      |       |       |       |       |      |       |       |      |      |      |        |      |       |      |       |      |      |      |      |       |      |      |       |      |       |      |      |       |      |      |       |      |      |      |       |      |      |       |      |      |          |    |    |    |   |  |     |    |  |    |  |       |    |  |    |    |  |        |    |    |  |     |                  |        |    |           |      |      |       |      |  |      |       |  |      |  |      |      |  |     |     |  |     |      |      |  |      |     |       |     |
| Rel. Inten. (% of BP)                                                                                                                                                                                                                                                                                                                                                                                                                                                                                                                                                                                                                                                                                                                                                                                                                                                                                                                                                                                                                                                                                                                                                                                                                                                                                                                                                                                                                                                                                                                                                                                                                                                                                                                                                                                                                                                                                                                                                                                                                                                                                                                                                                                                                                                                                                                                                                                                                                                                  | 0.04   | 0.73    | 0.90   | 2.75             | 8.30           | 0.43                               | 11.13                           | 26.57                      | 72.75                       | 8.89               | 7.74    | 14.63                  | 10.73                  | 11.15                                                           | 50.15              | 9.07    | 14.82   | 11.58   | 7.38    | 9.14    | 7.51    | 100.00                | 7.50    | 17.18   | 6.49     |         |         |         |         |         |         |         |         |         |         |         |                       |         |         |          |                         |      |      |      |      |      |      |      |      |       |      |      |      |      |      |       |      |      |      |      |      |      |       |      |      |      |                       |      |      |      |      |      |      |       |       |       |      |      |       |       |       |       |      |       |       |      |      |      |        |      |       |      |       |      |      |      |      |       |      |      |       |      |       |      |      |       |      |      |       |      |      |      |       |      |      |       |      |      |          |    |    |    |   |  |     |    |  |    |  |       |    |  |    |    |  |        |    |    |  |     |                  |        |    |           |      |      |       |      |  |      |       |  |      |  |      |      |  |     |     |  |     |      |      |  |      |     |       |     |
| Score                                                                                                                                                                                                                                                                                                                                                                                                                                                                                                                                                                                                                                                                                                                                                                                                                                                                                                                                                                                                                                                                                                                                                                                                                                                                                                                                                                                                                                                                                                                                                                                                                                                                                                                                                                                                                                                                                                                                                                                                                                                                                                                                                                                                                                                                                                                                                                                                                                                                                  | 0.20   | 0.50    | 0.22   | 1.00             | -0.08          | 0.20                               | 1.50                            | -0.27                      | 0.50                        | -0.09              | 0.50    | 0.50                   | -0.11                  | 0.75                                                            | 1.50               | -0.09   | 0.25    | 0.50    | 1.50    | -0.09   | 0.75    | 1.50                  | -0.07   | 0.50    | 1.50     |         |         |         |         |         |         |         |         |         |         |         |                       |         |         |          |                         |      |      |      |      |      |      |      |      |       |      |      |      |      |      |       |      |      |      |      |      |      |       |      |      |      |                       |      |      |      |      |      |      |       |       |       |      |      |       |       |       |       |      |       |       |      |      |      |        |      |       |      |       |      |      |      |      |       |      |      |       |      |       |      |      |       |      |      |       |      |      |      |       |      |      |       |      |      |          |    |    |    |   |  |     |    |  |    |  |       |    |  |    |    |  |        |    |    |  |     |                  |        |    |           |      |      |       |      |  |      |       |  |      |  |      |      |  |     |     |  |     |      |      |  |      |     |       |     |
| Ion-type                                                                                                                                                                                                                                                                                                                                                                                                                                                                                                                                                                                                                                                                                                                                                                                                                                                                                                                                                                                                                                                                                                                                                                                                                                                                                                                                                                                                                                                                                                                                                                                                                                                                                                                                                                                                                                                                                                                                                                                                                                                                                                                                                                                                                                                                                                                                                                                                                                                                               | PR     | KQ      | LI     | F                |                | RKQ                                | y1                              |                            | a2                          |                    | PE-28   | b2                     |                        | PE                                                              | y2                 |         | b3-H2O  | b3      | y3      |         | kLL     | y9 <sup>+2</sup>      | y7-NH3  | y7      |          |         |         |         |         |         |         |         |         |         |         |         |                       |         |         |          |                         |      |      |      |      |      |      |      |      |       |      |      |      |      |      |       |      |      |      |      |      |      |       |      |      |      |                       |      |      |      |      |      |      |       |       |       |      |      |       |       |       |       |      |       |       |      |      |      |        |      |       |      |       |      |      |      |      |       |      |      |       |      |       |      |      |       |      |      |       |      |      |      |       |      |      |       |      |      |          |    |    |    |   |  |     |    |  |    |  |       |    |  |    |    |  |        |    |    |  |     |                  |        |    |           |      |      |       |      |  |      |       |  |      |  |      |      |  |     |     |  |     |      |      |  |      |     |       |     |
| Delta ppm                                                                                                                                                                                                                                                                                                                                                                                                                                                                                                                                                                                                                                                                                                                                                                                                                                                                                                                                                                                                                                                                                                                                                                                                                                                                                                                                                                                                                                                                                                                                                                                                                                                                                                                                                                                                                                                                                                                                                                                                                                                                                                                                                                                                                                                                                                                                                                                                                                                                              | -3.2   | -8.0    | -10.8  | -6.5             |                | -5.0                               | -10.9                           |                            | -9.8                        |                    | -3.1    | -8.5                   |                        | 4.3                                                             | 0.1                |         | 0.7     | -0.3    | -0.9    |         | -0.6    | 4.0                   | -29.5   | 1.9     |          |         |         |         |         |         |         |         |         |         |         |         |                       |         |         |          |                         |      |      |      |      |      |      |      |      |       |      |      |      |      |      |       |      |      |      |      |      |      |       |      |      |      |                       |      |      |      |      |      |      |       |       |       |      |      |       |       |       |       |      |       |       |      |      |      |        |      |       |      |       |      |      |      |      |       |      |      |       |      |       |      |      |       |      |      |       |      |      |      |       |      |      |       |      |      |          |    |    |    |   |  |     |    |  |    |  |       |    |  |    |    |  |        |    |    |  |     |                  |        |    |           |      |      |       |      |  |      |       |  |      |  |      |      |  |     |     |  |     |      |      |  |      |     |       |     |

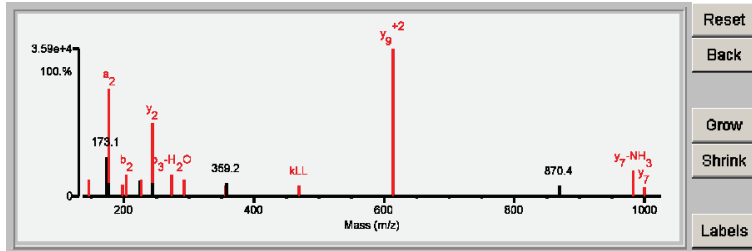

Reset

Back

Grow

Shrink

Labels



Result Summary

| Rank | Score | SPI (%) | BCS | # Unmatched Ions | Variable sites | Sequence                   | MH <sup>+</sup> Calculated (Da) | MH <sup>+</sup> Error (Da) | MH <sup>+</sup> Error (ppm) | Protein MW/pI (Da) | Species | Accession #             | Protein Name                                                                              |
|------|-------|---------|-----|------------------|----------------|----------------------------|---------------------------------|----------------------------|-----------------------------|--------------------|---------|-------------------------|-------------------------------------------------------------------------------------------|
| 1    | 24.20 | 100.0   | 9   | 0/25             | K382k          | (K)LVLAQLYKIVPNVLLLEQGK(A) | 2025.2107                       | 114.0701                   | 12.7                        | 51712.7/8.45       | HUMAN   | <a href="#">Q75390</a>  | Citrate synthase, mitochondrial OS=Homo sapiens GN=CS PE=1 SV=2                           |
| 2    | 9.17  | 62.1    | 4   | 10/25            | K393k          | (K)LVLAQLYKIVPNVLLLEQGK(A) | 2025.2107                       | 114.0701                   | 12.7                        | 51712.7/8.45       | HUMAN   | <a href="#">Q75390</a>  | Citrate synthase, mitochondrial OS=Homo sapiens GN=CS PE=1 SV=2                           |
| 3    | 5.74  | 62.8    | 4   | 14/25            | K261k K264k    | (K)VIKSKDLDLWGTAAIR(F)     | 1911.1637                       | 228.1170                   | 14.6                        | 145808.0/6.04      | HUMAN   | <a href="#">RQ14692</a> | REVERSE Ribosome biogenesis protein BMS1 homolog OS=Homo sapiens GN=BMS1 PE=1 SV=1        |
| 4    | 3.11  | 55.9    | 0   | 14/25            | K1424k         | (R)ENIIKVLISQLNITKGNK(L)   | 2025.2067                       | 114.0741                   | 14.6                        | 170545.1/7.01      | HUMAN   | <a href="#">RQ14146</a> | REVERSE Unhealthy ribosome biogenesis protein 2 homolog OS=Homo sapiens GN=URB2 PE=1 SV=2 |

Detailed Results

| Rank | Score | SPI (%) | BCS | # Unmatched Ions | Variable sites | Sequence                   | MH <sup>+</sup> Calculated (Da) | MH <sup>+</sup> Error (Da) | MH <sup>+</sup> Error (ppm) | Protein MW/pI (Da) | Species | Accession #            | MS-Digest Index #      | Protein Name                                                    |
|------|-------|---------|-----|------------------|----------------|----------------------------|---------------------------------|----------------------------|-----------------------------|--------------------|---------|------------------------|------------------------|-----------------------------------------------------------------|
| 1    | 24.20 | 100.0   | 9   | 0/25             | K382k          | (K)LVLAQLYKIVPNVLLLEQGK(A) | 2025.2107                       | 114.0701                   | 12.7                        | 51712.7/8.45       | HUMAN   | <a href="#">Q75390</a> | <a href="#">101769</a> | Citrate synthase, mitochondrial OS=Homo sapiens GN=CS PE=1 SV=2 |

| Fragment-ion (m/z)      | 70.064 | 72.080 | 84.079 | 86.096 | 185.164 | 200.103 | 212.102 | 213.158 | 311.171 | 313.188 | 455.296 | 499.290 <sup>+2</sup> | 519.296 | 548.828 <sup>+2</sup> | 574.323 | 618.358 | 687.411 | 726.443 <sup>+2</sup> | 786.471 | 900.513 | 930.546 | 964.053 <sup>+2</sup> | 997.570 | 1043.636 | 1096.630 |
|-------------------------|--------|--------|--------|--------|---------|---------|---------|---------|---------|---------|---------|-----------------------|---------|-----------------------|---------|---------|---------|-----------------------|---------|---------|---------|-----------------------|---------|----------|----------|
| Frac. Inten. (% of TIC) | 0.00   | 0.16   | 0.12   | 11.70  | 8.75    | 2.16    | 3.37    | 4.88    | 3.06    | 2.53    | 2.11    | 12.20                 | 1.97    | 2.24                  | 4.09    | 2.17    | 5.44    | 1.88                  | 2.85    | 1.89    | 2.96    | 4.48                  | 14.97   | 2.09     | 1.93     |
| Rel. Inten. (% of BP)   | 0.02   | 1.10   | 0.83   | 78.16  | 58.48   | 14.40   | 22.51   | 32.60   | 20.46   | 16.93   | 14.10   | 81.49                 | 13.13   | 14.99                 | 27.32   | 14.48   | 36.33   | 12.53                 | 19.05   | 12.63   | 19.75   | 29.92                 | 100.00  | 13.99    | 12.87    |
| Score                   | 0.20   | 0.50   | 0.50   | 0.50   | 0.50    | 0.75    | 0.75    | 0.75    | 0.75    | 0.75    | 0.75    | 1.50                  | 0.75    | 1.50                  | 1.50    | 0.75    | 1.50    | 1.50                  | 1.50    | 1.50    | 0.50    | 1.50                  | 1.50    | 0.50     | 1.50     |
| Ion-type                | PR     | V      | KQ     | 81     | 82      | AQ      | PN      | b2      | PNV     | AQL     | VLLE    | y9 <sup>+2</sup>      | Yk1     | y10 <sup>+2</sup>     | ys      | YkV     | y6      | y12 <sup>+2</sup>     | y7      | y8      | b7      | y16 <sup>+2</sup>     | y9      | bs       | y10      |
| Delta ppm               | -8.9   | -5.2   | -15.2  | -16.5  | -12.1   | -7.3    | -11.2   | -15.7   | -3.8    | -0.4    | 23.5    | 4.7                   | 4.9     | 12.1                  | 6.4     | -6.7    | 10.7    | 14.2                  | -0.6    | -2.7    | 4.8     | -0.7                  | 2.5     | 9.7      | -5.8     |
|                         |        |        |        | 0.50   | VL-28   | LI      | -12.1   | VL      | VL      |         |         |                       |         |                       |         |         |         |                       |         |         |         |                       |         |          |          |

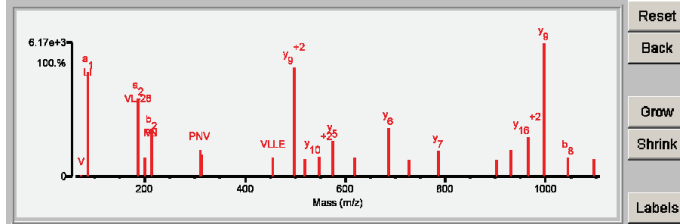

Result Summary

| Rank | Score | SPI (%) | BCS | # Unmatched Ions | Variable sites | Sequence              | MH <sup>+</sup> Calculated (Da) | MH <sup>+</sup> Error (Da) | MH <sup>+</sup> Error (ppm) | Protein MW/pI (Da) | Species | Accession #             | Protein Name                                                                                     |
|------|-------|---------|-----|------------------|----------------|-----------------------|---------------------------------|----------------------------|-----------------------------|--------------------|---------|-------------------------|--------------------------------------------------------------------------------------------------|
| 1    | 15.56 | 86.2    | 9   | 8/25             | K43K           | (K)DILADLIPKEGAR(I)   | 1481.8322                       | 114.0456                   | 1.7                         | 51712.7/8.45       | HUMAN   | <a href="#">Q75390</a>  | Citrate synthase, mitochondrial OS=Homo sapiens GN=CS PE=1 SV=2                                  |
| 2    | 8.06  | 69.2    | 2   | 13/25            | None           | (R)VQNALVNLRHFR(R)    | 1595.8765                       | 0.0014                     | 0.9                         | 337856.6/5.90      | HUMAN   | <a href="#">Q9Y485</a>  | DmX-like protein 1 OS=Homo sapiens GN=DMXL1 PE=1 SV=2                                            |
| 3    | 6.95  | 78.0    | 1   | 12/25            | None           | (R)SRHKNLAIDKEK(E)    | 1595.8612                       | 0.0166                     | 10.4                        | 79417.7/6.44       | HUMAN   | <a href="#">R094844</a> | REVERSE Rho-related BTB domain-containing protein 1 OS=Homo sapiens GN=RHOBTB1 PE=1 SV=2         |
| 4    | 6.92  | 66.1    | 3   | 13/25            | None           | (R)NTALLSELNKKVTHR(E) | 1595.8864                       | -0.0085                    | -5.3                        | 133504.9/5.87      | HUMAN   | <a href="#">RQ66GS9</a> | REVERSE Centrosomal protein of 135 kDa OS=Homo sapiens GN=CEP135 PE=1 SV=1                       |
| 5    | 6.64  | 73.4    | 2   | 14/25            | None           | (K)LPSPLDITAEVER(L)   | 1595.8751                       | 0.0027                     | 1.7                         | 125430.4/5.66      | HUMAN   | <a href="#">Q72222</a>  | Elongation factor Tu GTP-binding domain-containing protein 1 OS=Homo sapiens GN=EFTUD1 PE=1 SV=2 |

Detailed Results

| Rank | Score | SPI (%) | BCS | # Unmatched Ions | Variable sites | Sequence                                           | MH <sup>+</sup> Calculated (Da) | MH <sup>+</sup> Error (Da) | MH <sup>+</sup> Error (ppm) | Protein MW/pI (Da) | Species | Accession #            | MS-Digest Index #      | Protein Name                                                    |
|------|-------|---------|-----|------------------|----------------|----------------------------------------------------|---------------------------------|----------------------------|-----------------------------|--------------------|---------|------------------------|------------------------|-----------------------------------------------------------------|
| 1    | 15.56 | 86.2    | 9   | 8/25             | K43K           | (K)D I \ L A A \ D L / I / P / K / E / Q A / R (I) | 1481.8322                       | 114.0456                   | 1.7                         | 51712.7/8.45       | HUMAN   | <a href="#">Q75390</a> | <a href="#">101769</a> | Citrate synthase, mitochondrial OS=Homo sapiens GN=CS PE=1 SV=2 |

  

| Fragment-ion (m/z)      | 70.064 | 84.080 | 86.096 | 87.099 | 141.102 | 156.101 | 175.116 | 183.111 | 185.127 | 201.123 | 202.125 | 215.141 | 229.118 | 300.155 | 342.201 | 374.216 | 385.244 | 393.214 <sup>+2</sup> | 413.237 | 421.729 <sup>+2</sup> | 503.254 | 745.399 | 818.485 | 842.448 | 955.536 |
|-------------------------|--------|--------|--------|--------|---------|---------|---------|---------|---------|---------|---------|---------|---------|---------|---------|---------|---------|-----------------------|---------|-----------------------|---------|---------|---------|---------|---------|
| Frac. Inten. (% of TIC) | 0.00   | 0.07   | 0.78   | 1.28   | 1.93    | 2.30    | 1.41    | 1.62    | 1.45    | 22.61   | 2.23    | 1.45    | 4.73    | 8.65    | 1.56    | 1.69    | 1.56    | 1.76                  | 3.21    | 14.27                 | 2.79    | 2.13    | 1.23    | 17.55   | 1.74    |
| Rel. Inten. (% of BP)   | 0.01   | 0.30   | 3.43   | 5.65   | 8.52    | 10.19   | 6.25    | 7.15    | 6.42    | 100.00  | 9.86    | 6.40    | 20.94   | 38.23   | 6.88    | 7.49    | 6.89    | 7.77                  | 14.21   | 63.12                 | 12.35   | 9.41    | 5.45    | 77.62   | 7.70    |
| Score                   | 0.20   | 0.50   | 0.22   | -0.06  | -0.09   | -0.10   | 1.50    | -0.07   | 0.75    | 0.50    | -0.10   | -0.06   | 0.75    | 0.75    | 0.75    | 1.50    | 0.50    | -0.08                 | 0.75    | 1.50                  | 1.50    | 1.50    | -0.05   | 1.50    | 1.50    |
| Ion-type                | PR     | KQ     | LI     |        |         |         | y1      |         | LA      | a2      |         | b2      | ADL     | b3      | y3      | a4      |         |                       | b4      | y6 <sup>+2</sup>      | y4      | y5      |         | y6      | y7      |
| Delta ppm               | -13.2  | -11.6  | -9.6   |        |         |         | -16.9   |         | -13.2   |         | DL-28   |         | DL      |         | DLI     | ADLI-28 |         |                       | ADLI    | 3.8                   | -6.8    | 4.8     |         | 0.6     | 4.5     |

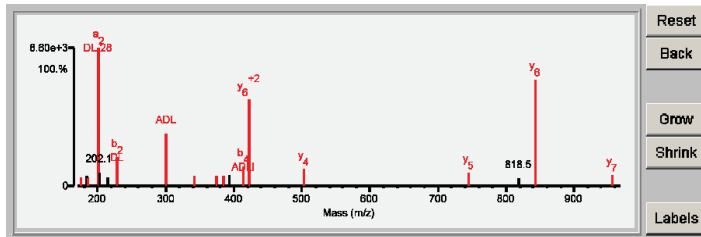

Result Summary

| Rank | Score | SPI (%) | BCS | # Unmatched ions | Variable sites | Sequence             | MH <sup>+</sup> Calculated (Da) | MH <sup>+</sup> Error (Da) | MH <sup>+</sup> Error (ppm) | Protein MW/pl (Da) | Species | Accession # | Protein Name                                                    |
|------|-------|---------|-----|------------------|----------------|----------------------|---------------------------------|----------------------------|-----------------------------|--------------------|---------|-------------|-----------------------------------------------------------------|
| 1    | 11.38 | 56.3    | 6   | 10/24            | K459K          | (K)SMSTEGLMKFVDSK(S) | 1559.7444                       | 114.0501                   | 4.3                         | 51712.7/8.45       | HUMAN   | O75390      | Citrate synthase, mitochondrial OS=Homo sapiens GN=CS PE=1 SV=2 |

Detailed Results

| Rank | Score | SPI (%) | BCS | # Unmatched ions | Variable sites | Sequence                                       | MH <sup>+</sup> Calculated (Da) | MH <sup>+</sup> Error (Da) | MH <sup>+</sup> Error (ppm) | Protein MW/pl (Da) | Species | Accession # | MS-Digest Index # | Protein Name                                                    |
|------|-------|---------|-----|------------------|----------------|------------------------------------------------|---------------------------------|----------------------------|-----------------------------|--------------------|---------|-------------|-------------------|-----------------------------------------------------------------|
| 1    | 11.38 | 56.3    | 6   | 10/24            | K459K          | (K)S M I S T E / G L / M k / F V / D / S K (S) | 1559.7444                       | 114.0501                   | 4.3                         | 51712.7/8.45       | HUMAN   | O75390      | 101769            | Citrate synthase, mitochondrial OS=Homo sapiens GN=CS PE=1 SV=2 |

| Fragment-ion (m/z)     | 60.043 | 72.081 | 84.079 | 86.095 | 87.052 | 104.053 | 129.097 | 143.079 | 144.082 | 189.080 | 191.083 | 219.081 | 234.142 | 288.115 | 300.119 | 349.175 | 358.216 <sup>+2</sup> | 406.267 | 411.206 | 595.289 | 728.353 <sup>+2</sup> | 844.447 | 968.484 | 1138.569 |
|------------------------|--------|--------|--------|--------|--------|---------|---------|---------|---------|---------|---------|---------|---------|---------|---------|---------|-----------------------|---------|---------|---------|-----------------------|---------|---------|----------|
| Frac. Inten.(% of TIC) | 5.06   | 0.11   | 0.35   | 0.33   | 3.99   | 3.35    | 5.07    | 20.91   | 1.84    | 3.73    | 13.74   | 4.15    | 7.79    | 1.87    | 1.73    | 3.81    | 1.66                  | 1.65    | 1.97    | 2.63    | 7.01                  | 1.56    | 3.97    | 1.72     |
| Rel. Inten.(% of BP)   | 24.21  | 0.52   | 1.67   | 1.56   | 19.10  | 16.03   | 24.24   | 100.00  | 8.81    | 17.81   | 65.68   | 19.83   | 37.27   | 8.96    | 8.25    | 18.21   | 7.93                  | 7.90    | 9.44    | 12.57   | 33.52                 | 7.46    | 18.97   | 8.21     |
| Score                  | 0.50   | 0.50   | 0.50   | 0.22   | -0.19  | -0.16   | -0.24   | -1.00   | -0.09   | 0.75    | 0.50    | 0.75    | 1.50    | 0.75    | -0.08   | 1.50    | -0.08                 | -0.08   | -0.09   | 1.50    | 1.50                  | -0.07   | 1.50    | 1.50     |
| Ion-type               | a1     | V      | KQ     | LI     |        |         |         |         |         | ST      | a2      | b2      | y2      | TEG     | y3      |         |                       |         |         | y5      | y12 <sup>+2</sup>     | y7      | y9      |          |
| Delta ppm              | -39.8  | 1.7    | -24.7  | -17.7  |        |         |         |         |         | -41.1   | -17.6   | -1.3    | -11.2   | -16.3   | 10.4    |         |                       |         |         | -33.8   | -10.8                 | -3.4    | -20.3   |          |
|                        |        |        |        |        |        |         |         |         |         | MS-28   | MS      |         |         |         |         |         |                       |         |         |         |                       |         |         |          |

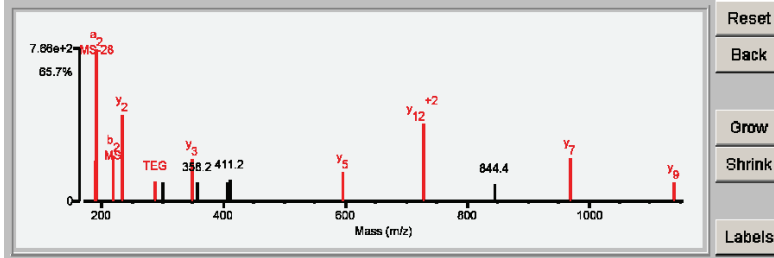

Result Summary

| Rank | Score | SPI (%) | BCS | # Unmatched Ions | Variable sites | Sequence                                      | MH <sup>+</sup> Calculated (Da) | MH <sup>+</sup> Error (Da) | MH <sup>+</sup> Error (ppm) | Protein MW (Da) | Species | Accession # | Protein Name                                               |
|------|-------|---------|-----|------------------|----------------|-----------------------------------------------|---------------------------------|----------------------------|-----------------------------|-----------------|---------|-------------|------------------------------------------------------------|
| 1    | 17.74 | 87.8    | 8   | 4/25             | K265k          | (K)DSGYPETLVNLI <del>VLS</del> QHLGKPEVTNR(Y) | 2976.5789                       | 114.0629                   | 6.4                         | 34482.2/4.98    | HUMAN   | O14579      | Coatomer subunit epsilon OS=Homo sapiens GN=COPE PE=1 SV=3 |

Detailed Results

| Rank                    | Score  | SPI (%) | BCS    | # Unmatched Ions | Variable sites | Sequence                                                                         | MH <sup>+</sup> Calculated (Da) | MH <sup>+</sup> Error (Da) | MH <sup>+</sup> Error (ppm)      | Protein MW (Da) | Species | Accession #    | MS-Digest Index #     | Protein Name                                               |                       |         |                               |                               |                               |                                                |                               |                               |                       |                               |          |       |
|-------------------------|--------|---------|--------|------------------|----------------|----------------------------------------------------------------------------------|---------------------------------|----------------------------|----------------------------------|-----------------|---------|----------------|-----------------------|------------------------------------------------------------|-----------------------|---------|-------------------------------|-------------------------------|-------------------------------|------------------------------------------------|-------------------------------|-------------------------------|-----------------------|-------------------------------|----------|-------|
| 1                       | 17.74  | 87.8    | 8      | 4/25             | K265k          | (K)D S <del>G</del> V P E T L V N L I <del>V</del> L S Q H L G K P E V T N R (Y) | 2976.5789                       | 114.0629                   | 6.4                              | 34482.2/4.98    | HUMAN   | O14579         | 118189                | Coatomer subunit epsilon OS=Homo sapiens GN=COPE PE=1 SV=3 |                       |         |                               |                               |                               |                                                |                               |                               |                       |                               |          |       |
| Fragment-ion (m/z)      | 70.066 | 72.079  | 84.079 | 86.097           | 110.070        | 136.073                                                                          | 203.068                         | 227.098                    | 242.081                          | 260.090         | 328.144 | 395.156        | 406.726 <sup>+2</sup> | 423.142                                                    | 631.806 <sup>+2</sup> | 637.293 | 768.904 <sup>+2</sup>         | 812.433                       | 845.473 <sup>+2</sup>         | 884.491 <sup>+3</sup>                          | 890.169 <sup>+3</sup>         | 894.981 <sup>+2</sup>         | 929.093 <sup>+2</sup> | 951.530 <sup>+2</sup>         | 1112.621 |       |
| Frac. Inten. (% of TIC) | 0.01   | 0.12    | 0.11   | 0.29             | 0.11           | 0.27                                                                             | 3.90                            | 3.43                       | 5.28                             | 5.93            | 3.26    | 3.74           | 3.76                  | 4.33                                                       | 4.11                  | 2.66    | 3.85                          | 7.57                          | 2.87                          | 3.06                                           | 27.92                         | 4.97                          | 2.87                  | 3.06                          | 2.52     |       |
| Rel. Inten. (% of BP)   | 0.02   | 0.43    | 0.39   | 1.05             | 0.40           | 0.95                                                                             | 13.98                           | 12.27                      | 18.91                            | 21.22           | 11.67   | 13.40          | 13.47                 | 15.51                                                      | 14.74                 | 9.51    | 13.81                         | 27.12                         | 10.28                         | 10.95                                          | 100.00                        | 17.82                         | 10.28                 | 10.97                         | 9.01     |       |
| Score                   | 0.20   | 0.50    | 0.50   | 0.22             | 1.00           | 1.00                                                                             | 0.50                            | 0.75                       | 0.25                             | 0.50            | 0.75    | 0.50           | 0.50                  | 0.50                                                       | -0.15                 | -0.10   | 1.50                          | 1.50                          | 1.50                          | 0.50                                           | 1.50                          | 1.50                          | 1.50                  | -0.10                         | 1.50     | -0.09 |
| Ion-type                | PR     | V       | KQ     | LI               | H              | Y                                                                                | b <sub>2</sub>                  | PE                         | b <sub>3</sub> +H <sub>2</sub> O | b <sub>3</sub>  | PET     | a <sub>1</sub> | y <sup>+2</sup>       | b <sub>4</sub>                                             |                       |         | y <sub>13</sub> <sup>+2</sup> | y <sub>14</sub> <sup>+2</sup> | y <sub>15</sub> <sup>+2</sup> | y <sub>23</sub> -NH <sub>3</sub> <sup>+3</sup> | y <sub>23</sub> <sup>+3</sup> | y <sub>15</sub> <sup>+2</sup> |                       | y <sub>16</sub> <sup>+2</sup> |          |       |
| Delta ppm               | 6.8    | -20.5   | -24.7  | 3.2              | -13.4          | -22.0                                                                            | 3.2                             | -26.6                      | 11.0                             | 3.0             | -21.1   | -2.3           | 22.2                  | -23.5                                                      |                       |         | -11.7                         | 8.4                           | 21.6                          | 3.1                                            | 5.5                           | -8.8                          |                       | -1.2                          |          |       |

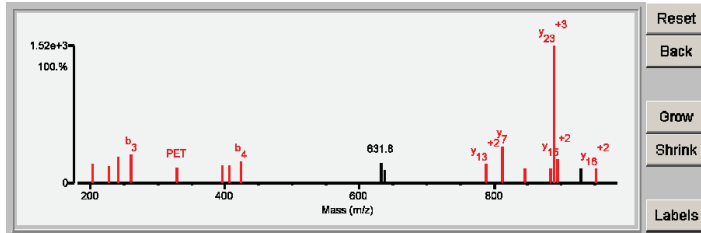

Result Summary

| Rank | Score | SPI (%) | BCS | # Unmatched Ions | Variable sites | Sequence                  | MH <sup>+</sup> Calculated (Da) | MH <sup>+</sup> Error (Da) | MH <sup>+</sup> Error (ppm) | Protein MW/pl (Da) | Species | Accession # | Protein Name                                |
|------|-------|---------|-----|------------------|----------------|---------------------------|---------------------------------|----------------------------|-----------------------------|--------------------|---------|-------------|---------------------------------------------|
| 1    | 13.52 | 71.7    | 7   | 8/25             | K112k          | (K)KEDLVFIFWAPESAPLkSk(M) | 2205.1954                       | 114.0636                   | 8.9                         | 18502.6/8.22       | HUMAN   | P23528      | Cofilin-1 OS=Homo sapiens GN=CFL1 PE=1 SV=3 |
| 1    | 13.52 | 71.7    | 7   | 8/25             | K112k          | (K)KEDLVFIFWAPESAPLkSk(M) | 2205.1954                       | 114.0636                   | 8.9                         | 18736.7/7.66       | HUMAN   | Q9Y281      | Cofilin-2 OS=Homo sapiens GN=CFL2 PE=1 SV=1 |
| 2    | 11.82 | 68.8    | 6   | 9/25             | K114k          | (K)KEDLVFIFWAPESAPLkSk(M) | 2205.1954                       | 114.0636                   | 8.9                         | 18502.6/8.22       | HUMAN   | P23528      | Cofilin-1 OS=Homo sapiens GN=CFL1 PE=1 SV=3 |
| 2    | 11.82 | 68.8    | 6   | 9/25             | K114k          | (K)KEDLVFIFWAPESAPLkSk(M) | 2205.1954                       | 114.0636                   | 8.9                         | 18736.7/7.66       | HUMAN   | Q9Y281      | Cofilin-2 OS=Homo sapiens GN=CFL2 PE=1 SV=1 |

Detailed Results

| Rank | Score | SPI (%) | BCS | # Unmatched Ions | Variable sites | Sequence                  | MH <sup>+</sup> Calculated (Da) | MH <sup>+</sup> Error (Da) | MH <sup>+</sup> Error (ppm) | Protein MW/pl (Da) | Species | Accession # | MS-Digest Index # | Protein Name                                |
|------|-------|---------|-----|------------------|----------------|---------------------------|---------------------------------|----------------------------|-----------------------------|--------------------|---------|-------------|-------------------|---------------------------------------------|
| 1    | 13.52 | 71.7    | 7   | 8/25             | K112k          | (K)KEDLVFIFWAPESAPLkSk(M) | 2205.1954                       | 114.0636                   | 8.9                         | 18502.6/8.22       | HUMAN   | P23528      | 116581            | Cofilin-1 OS=Homo sapiens GN=CFL1 PE=1 SV=3 |
| 1    | 13.52 | 71.7    | 7   | 8/25             | K112k          | (K)KEDLVFIFWAPESAPLkSk(M) | 2205.1954                       | 114.0636                   | 8.9                         | 18736.7/7.66       | HUMAN   | Q9Y281      | 116601            | Cofilin-2 OS=Homo sapiens GN=CFL2 PE=1 SV=1 |

  

| Fragment-ion (m/z)      | 70.064 | 72.081 | 84.081 | 86.096 | 120.080 | 121.083 | 130.071 | 159.092 | 185.162 | 199.100 | 234.150        | 296.124 | 334.154 | 343.715 <sup>+2</sup>        | 458.242 | 486.270        | 500.236 | 535.798 <sup>+2</sup>        | 585.317        | 588.318 | 686.422        | 732.386        | 845.464        | 991.515        | 1070.593 |
|-------------------------|--------|--------|--------|--------|---------|---------|---------|---------|---------|---------|----------------|---------|---------|------------------------------|---------|----------------|---------|------------------------------|----------------|---------|----------------|----------------|----------------|----------------|----------|
| Frac. Inten. (% of TIC) | 0.01   | 0.17   | 0.32   | 0.53   | 0.73    | 3.62    | 2.80    | 0.09    | 3.09    | 4.62    | 2.92           | 3.34    | 4.86    | 14.86                        | 5.03    | 3.52           | 2.85    | 9.48                         | 3.57           | 3.83    | 7.04           | 7.31           | 7.89           | 2.94           | 4.58     |
| Rel. Inten. (% of BP)   | 0.07   | 1.17   | 2.15   | 3.59   | 4.89    | 24.33   | 18.84   | 0.62    | 20.76   | 31.08   | 19.66          | 22.47   | 32.67   | 100.00                       | 33.86   | 23.69          | 19.19   | 63.76                        | 24.04          | 25.75   | 47.38          | 49.19          | 53.09          | 19.79          | 30.80    |
| Score                   | 0.20   | 0.50   | 0.50   | 0.22   | 1.00    | -0.24   | -0.19   | 2.00    | -0.21   | -0.31   | 1.50           | -0.22   | 0.75    | 1.50                         | -0.34   | 0.50           | -0.19   | 1.50                         | 0.50           | 0.75    | 1.50           | 0.50           | 0.50           | -0.20          | 1.50     |
| Ion-type                | PR     | V      | KQ     | LI     | F       |         | W       |         |         |         | y <sub>2</sub> |         | FW      | y <sub>5</sub> <sup>+2</sup> |         | b <sub>4</sub> |         | y <sub>9</sub> <sup>+2</sup> | b <sub>5</sub> | DLVFI   | y <sub>5</sub> | b <sub>6</sub> | b <sub>7</sub> | y <sub>9</sub> |          |
| Delta ppm               | -13.2  | 1.7    | 1.5    | -10.8  | -10.6   |         | 1.4     |         |         |         | 24.2           |         | -7.2    | 5.2                          |         | 26.7           |         | 4.9                          | -14.1          | -38.7   | 3.1            | -10.7          | -16.4          | 8.1            |          |

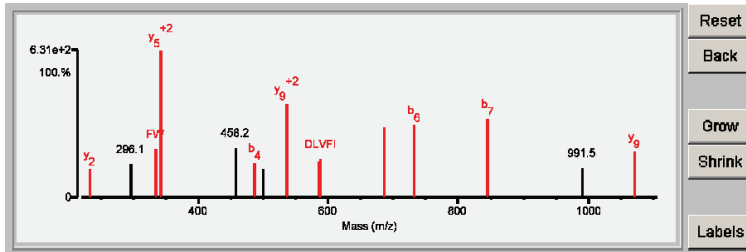

Result Summary

| Rank | Score | SPI (%) | BCS | # Unmatched ions | Variable sites | Sequence            | MH <sup>+</sup> Calculated (Da) | MH <sup>+</sup> Error (Da) | MH <sup>+</sup> Error (ppm) | Protein MW/pI (Da) | Species | Accession # | Protein Name                                                                   |
|------|-------|---------|-----|------------------|----------------|---------------------|---------------------------------|----------------------------|-----------------------------|--------------------|---------|-------------|--------------------------------------------------------------------------------|
| 1    | 18.40 | 93.7    | 7   | 1/25             | K63K           | (K)ELVEKLLEGYLK(E)  | 1433.8250                       | 114.0498                   | 4.5                         | 39446.9/4.93       | HUMAN   | Q96G28      | Coiled-coil domain-containing protein 104 OS=Homo sapiens GN=CCDC104 PE=1 SV=2 |
| 2    | 6.29  | 56.6    | 2   | 9/25             | None           | (K)AAKSEHITKNIHK(A) | 1547.8653                       | 0.0096                     | 6.2                         | 111631.0/8.76      | HUMAN   | Q9Y2L6      | FERM domain-containing protein 4B OS=Homo sapiens GN=FRMD4B PE=1 SV=2          |

Detailed Results

| Rank                                                                                                                                                                                                                                                                                                                                                                                                                                                                                                                                                                                                                                                                                                                                                                                                                                                                                                                                                                                                                                                                                                                                                                                                                                                                                                                                                                                                                                                                                                                                                                                                                                                                                                                                                                                                                                                                                                                                                                                                                                                                                                                                                                                                                                                                                                                                                                                                                                                                                                                  | Score  | SPI (%) | BCS    | # Unmatched ions | Variable sites | Sequence           | MH <sup>+</sup> Calculated (Da) | MH <sup>+</sup> Error (Da) | MH <sup>+</sup> Error (ppm) | Protein MW/pI (Da) | Species | Accession # | MS-Digest Index # | Protein Name                                                                   |                    |         |         |         |         |         |         |         |         |         |         |         |         |         |         |         |         |         |         |         |         |         |         |         |         |         |                        |      |      |      |      |      |      |      |      |      |      |       |      |      |      |      |      |      |      |      |      |      |       |      |      |      |                      |      |      |      |       |      |      |       |      |       |       |       |       |       |       |       |       |       |       |       |       |       |        |       |       |       |       |      |      |      |      |      |      |      |      |      |       |      |      |      |      |      |      |      |      |      |      |      |      |      |      |      |          |   |   |    |    |    |     |        |   |    |    |    |    |    |        |     |     |    |        |    |        |    |        |    |    |  |           |      |  |      |      |       |      |       |      |       |  |      |     |      |     |       |     |      |      |      |     |      |     |      |     |      |
|-----------------------------------------------------------------------------------------------------------------------------------------------------------------------------------------------------------------------------------------------------------------------------------------------------------------------------------------------------------------------------------------------------------------------------------------------------------------------------------------------------------------------------------------------------------------------------------------------------------------------------------------------------------------------------------------------------------------------------------------------------------------------------------------------------------------------------------------------------------------------------------------------------------------------------------------------------------------------------------------------------------------------------------------------------------------------------------------------------------------------------------------------------------------------------------------------------------------------------------------------------------------------------------------------------------------------------------------------------------------------------------------------------------------------------------------------------------------------------------------------------------------------------------------------------------------------------------------------------------------------------------------------------------------------------------------------------------------------------------------------------------------------------------------------------------------------------------------------------------------------------------------------------------------------------------------------------------------------------------------------------------------------------------------------------------------------------------------------------------------------------------------------------------------------------------------------------------------------------------------------------------------------------------------------------------------------------------------------------------------------------------------------------------------------------------------------------------------------------------------------------------------------|--------|---------|--------|------------------|----------------|--------------------|---------------------------------|----------------------------|-----------------------------|--------------------|---------|-------------|-------------------|--------------------------------------------------------------------------------|--------------------|---------|---------|---------|---------|---------|---------|---------|---------|---------|---------|---------|---------|---------|---------|---------|---------|---------|---------|---------|---------|---------|---------|---------|---------|---------|------------------------|------|------|------|------|------|------|------|------|------|------|-------|------|------|------|------|------|------|------|------|------|------|-------|------|------|------|----------------------|------|------|------|-------|------|------|-------|------|-------|-------|-------|-------|-------|-------|-------|-------|-------|-------|-------|-------|-------|--------|-------|-------|-------|-------|------|------|------|------|------|------|------|------|------|-------|------|------|------|------|------|------|------|------|------|------|------|------|------|------|------|----------|---|---|----|----|----|-----|--------|---|----|----|----|----|----|--------|-----|-----|----|--------|----|--------|----|--------|----|----|--|-----------|------|--|------|------|-------|------|-------|------|-------|--|------|-----|------|-----|-------|-----|------|------|------|-----|------|-----|------|-----|------|
| 1                                                                                                                                                                                                                                                                                                                                                                                                                                                                                                                                                                                                                                                                                                                                                                                                                                                                                                                                                                                                                                                                                                                                                                                                                                                                                                                                                                                                                                                                                                                                                                                                                                                                                                                                                                                                                                                                                                                                                                                                                                                                                                                                                                                                                                                                                                                                                                                                                                                                                                                     | 18.40  | 93.7    | 7      | 1/25             | K63K           | (K)ELVEKLLEGYLK(E) | 1433.8250                       | 114.0498                   | 4.5                         | 39446.9/4.93       | HUMAN   | Q96G28      | 84057             | Coiled-coil domain-containing protein 104 OS=Homo sapiens GN=CCDC104 PE=1 SV=2 |                    |         |         |         |         |         |         |         |         |         |         |         |         |         |         |         |         |         |         |         |         |         |         |         |         |         |                        |      |      |      |      |      |      |      |      |      |      |       |      |      |      |      |      |      |      |      |      |      |       |      |      |      |                      |      |      |      |       |      |      |       |      |       |       |       |       |       |       |       |       |       |       |       |       |       |        |       |       |       |       |      |      |      |      |      |      |      |      |      |       |      |      |      |      |      |      |      |      |      |      |      |      |      |      |      |          |   |   |    |    |    |     |        |   |    |    |    |    |    |        |     |     |    |        |    |        |    |        |    |    |  |           |      |  |      |      |       |      |       |      |       |  |      |     |      |     |       |     |      |      |      |     |      |     |      |     |      |
| <table border="1"> <thead> <tr> <th>Fragment-ion (m/z)</th> <th>72.080</th> <th>84.044</th> <th>84.080</th> <th>86.096</th> <th>102.055</th> <th>129.101</th> <th>130.084</th> <th>136.074</th> <th>147.111</th> <th>197.128</th> <th>215.140</th> <th>229.120</th> <th>243.135</th> <th>260.197</th> <th>324.189</th> <th>350.137</th> <th>356.229</th> <th>372.187</th> <th>453.242</th> <th>480.285</th> <th>591.321</th> <th>609.325</th> <th>695.371</th> <th>722.410</th> <th>835.489</th> </tr> </thead> <tbody> <tr> <td>Frac. Inten.(% of TIC)</td> <td>0.53</td> <td>0.13</td> <td>0.79</td> <td>1.23</td> <td>0.13</td> <td>0.23</td> <td>3.72</td> <td>0.30</td> <td>7.86</td> <td>6.30</td> <td>10.11</td> <td>3.13</td> <td>4.24</td> <td>4.90</td> <td>3.18</td> <td>5.15</td> <td>3.64</td> <td>4.24</td> <td>2.74</td> <td>8.54</td> <td>2.77</td> <td>11.95</td> <td>4.04</td> <td>6.82</td> <td>3.36</td> </tr> <tr> <td>Rel. Inten.(% of BP)</td> <td>4.40</td> <td>1.08</td> <td>6.58</td> <td>10.27</td> <td>1.12</td> <td>1.93</td> <td>31.10</td> <td>2.48</td> <td>65.79</td> <td>52.71</td> <td>84.60</td> <td>26.19</td> <td>35.49</td> <td>41.04</td> <td>26.62</td> <td>43.12</td> <td>30.46</td> <td>35.46</td> <td>22.95</td> <td>71.49</td> <td>23.18</td> <td>100.00</td> <td>33.78</td> <td>57.08</td> <td>28.13</td> </tr> <tr> <td>Score</td> <td>0.50</td> <td>0.50</td> <td>0.22</td> <td>1.00</td> <td>0.20</td> <td>0.50</td> <td>1.00</td> <td>1.50</td> <td>1.50</td> <td>-0.53</td> <td>0.50</td> <td>0.75</td> <td>0.75</td> <td>1.50</td> <td>0.25</td> <td>0.75</td> <td>0.75</td> <td>0.75</td> <td>0.25</td> <td>1.50</td> <td>0.50</td> <td>1.50</td> <td>0.25</td> <td>1.50</td> <td>1.50</td> </tr> <tr> <td>Ion-type</td> <td>V</td> <td>E</td> <td>KQ</td> <td>LI</td> <td>a1</td> <td>RKQ</td> <td>y1-NH3</td> <td>Y</td> <td>y1</td> <td>a2</td> <td>VE</td> <td>b2</td> <td>y2</td> <td>b3-H2O</td> <td>EGY</td> <td>LLE</td> <td>Ek</td> <td>b4-H2O</td> <td>y4</td> <td>y5-H2O</td> <td>y5</td> <td>b5-H2O</td> <td>y6</td> <td>y7</td> <td></td> </tr> <tr> <td>Delta ppm</td> <td>-5.2</td> <td></td> <td>-8.0</td> <td>-8.4</td> <td>-12.3</td> <td>-8.8</td> <td>-19.6</td> <td>-9.5</td> <td>-13.6</td> <td></td> <td>-1.9</td> <td>1.4</td> <td>-1.8</td> <td>1.3</td> <td>-10.7</td> <td>4.4</td> <td>29.2</td> <td>-5.8</td> <td>14.0</td> <td>7.2</td> <td>11.5</td> <td>0.9</td> <td>-2.8</td> <td>1.8</td> <td>-3.7</td> </tr> </tbody> </table> |        |         |        |                  |                |                    |                                 |                            |                             |                    |         |             |                   |                                                                                | Fragment-ion (m/z) | 72.080  | 84.044  | 84.080  | 86.096  | 102.055 | 129.101 | 130.084 | 136.074 | 147.111 | 197.128 | 215.140 | 229.120 | 243.135 | 260.197 | 324.189 | 350.137 | 356.229 | 372.187 | 453.242 | 480.285 | 591.321 | 609.325 | 695.371 | 722.410 | 835.489 | Frac. Inten.(% of TIC) | 0.53 | 0.13 | 0.79 | 1.23 | 0.13 | 0.23 | 3.72 | 0.30 | 7.86 | 6.30 | 10.11 | 3.13 | 4.24 | 4.90 | 3.18 | 5.15 | 3.64 | 4.24 | 2.74 | 8.54 | 2.77 | 11.95 | 4.04 | 6.82 | 3.36 | Rel. Inten.(% of BP) | 4.40 | 1.08 | 6.58 | 10.27 | 1.12 | 1.93 | 31.10 | 2.48 | 65.79 | 52.71 | 84.60 | 26.19 | 35.49 | 41.04 | 26.62 | 43.12 | 30.46 | 35.46 | 22.95 | 71.49 | 23.18 | 100.00 | 33.78 | 57.08 | 28.13 | Score | 0.50 | 0.50 | 0.22 | 1.00 | 0.20 | 0.50 | 1.00 | 1.50 | 1.50 | -0.53 | 0.50 | 0.75 | 0.75 | 1.50 | 0.25 | 0.75 | 0.75 | 0.75 | 0.25 | 1.50 | 0.50 | 1.50 | 0.25 | 1.50 | 1.50 | Ion-type | V | E | KQ | LI | a1 | RKQ | y1-NH3 | Y | y1 | a2 | VE | b2 | y2 | b3-H2O | EGY | LLE | Ek | b4-H2O | y4 | y5-H2O | y5 | b5-H2O | y6 | y7 |  | Delta ppm | -5.2 |  | -8.0 | -8.4 | -12.3 | -8.8 | -19.6 | -9.5 | -13.6 |  | -1.9 | 1.4 | -1.8 | 1.3 | -10.7 | 4.4 | 29.2 | -5.8 | 14.0 | 7.2 | 11.5 | 0.9 | -2.8 | 1.8 | -3.7 |
| Fragment-ion (m/z)                                                                                                                                                                                                                                                                                                                                                                                                                                                                                                                                                                                                                                                                                                                                                                                                                                                                                                                                                                                                                                                                                                                                                                                                                                                                                                                                                                                                                                                                                                                                                                                                                                                                                                                                                                                                                                                                                                                                                                                                                                                                                                                                                                                                                                                                                                                                                                                                                                                                                                    | 72.080 | 84.044  | 84.080 | 86.096           | 102.055        | 129.101            | 130.084                         | 136.074                    | 147.111                     | 197.128            | 215.140 | 229.120     | 243.135           | 260.197                                                                        | 324.189            | 350.137 | 356.229 | 372.187 | 453.242 | 480.285 | 591.321 | 609.325 | 695.371 | 722.410 | 835.489 |         |         |         |         |         |         |         |         |         |         |         |         |         |         |         |                        |      |      |      |      |      |      |      |      |      |      |       |      |      |      |      |      |      |      |      |      |      |       |      |      |      |                      |      |      |      |       |      |      |       |      |       |       |       |       |       |       |       |       |       |       |       |       |       |        |       |       |       |       |      |      |      |      |      |      |      |      |      |       |      |      |      |      |      |      |      |      |      |      |      |      |      |      |      |          |   |   |    |    |    |     |        |   |    |    |    |    |    |        |     |     |    |        |    |        |    |        |    |    |  |           |      |  |      |      |       |      |       |      |       |  |      |     |      |     |       |     |      |      |      |     |      |     |      |     |      |
| Frac. Inten.(% of TIC)                                                                                                                                                                                                                                                                                                                                                                                                                                                                                                                                                                                                                                                                                                                                                                                                                                                                                                                                                                                                                                                                                                                                                                                                                                                                                                                                                                                                                                                                                                                                                                                                                                                                                                                                                                                                                                                                                                                                                                                                                                                                                                                                                                                                                                                                                                                                                                                                                                                                                                | 0.53   | 0.13    | 0.79   | 1.23             | 0.13           | 0.23               | 3.72                            | 0.30                       | 7.86                        | 6.30               | 10.11   | 3.13        | 4.24              | 4.90                                                                           | 3.18               | 5.15    | 3.64    | 4.24    | 2.74    | 8.54    | 2.77    | 11.95   | 4.04    | 6.82    | 3.36    |         |         |         |         |         |         |         |         |         |         |         |         |         |         |         |                        |      |      |      |      |      |      |      |      |      |      |       |      |      |      |      |      |      |      |      |      |      |       |      |      |      |                      |      |      |      |       |      |      |       |      |       |       |       |       |       |       |       |       |       |       |       |       |       |        |       |       |       |       |      |      |      |      |      |      |      |      |      |       |      |      |      |      |      |      |      |      |      |      |      |      |      |      |      |          |   |   |    |    |    |     |        |   |    |    |    |    |    |        |     |     |    |        |    |        |    |        |    |    |  |           |      |  |      |      |       |      |       |      |       |  |      |     |      |     |       |     |      |      |      |     |      |     |      |     |      |
| Rel. Inten.(% of BP)                                                                                                                                                                                                                                                                                                                                                                                                                                                                                                                                                                                                                                                                                                                                                                                                                                                                                                                                                                                                                                                                                                                                                                                                                                                                                                                                                                                                                                                                                                                                                                                                                                                                                                                                                                                                                                                                                                                                                                                                                                                                                                                                                                                                                                                                                                                                                                                                                                                                                                  | 4.40   | 1.08    | 6.58   | 10.27            | 1.12           | 1.93               | 31.10                           | 2.48                       | 65.79                       | 52.71              | 84.60   | 26.19       | 35.49             | 41.04                                                                          | 26.62              | 43.12   | 30.46   | 35.46   | 22.95   | 71.49   | 23.18   | 100.00  | 33.78   | 57.08   | 28.13   |         |         |         |         |         |         |         |         |         |         |         |         |         |         |         |                        |      |      |      |      |      |      |      |      |      |      |       |      |      |      |      |      |      |      |      |      |      |       |      |      |      |                      |      |      |      |       |      |      |       |      |       |       |       |       |       |       |       |       |       |       |       |       |       |        |       |       |       |       |      |      |      |      |      |      |      |      |      |       |      |      |      |      |      |      |      |      |      |      |      |      |      |      |      |          |   |   |    |    |    |     |        |   |    |    |    |    |    |        |     |     |    |        |    |        |    |        |    |    |  |           |      |  |      |      |       |      |       |      |       |  |      |     |      |     |       |     |      |      |      |     |      |     |      |     |      |
| Score                                                                                                                                                                                                                                                                                                                                                                                                                                                                                                                                                                                                                                                                                                                                                                                                                                                                                                                                                                                                                                                                                                                                                                                                                                                                                                                                                                                                                                                                                                                                                                                                                                                                                                                                                                                                                                                                                                                                                                                                                                                                                                                                                                                                                                                                                                                                                                                                                                                                                                                 | 0.50   | 0.50    | 0.22   | 1.00             | 0.20           | 0.50               | 1.00                            | 1.50                       | 1.50                        | -0.53              | 0.50    | 0.75        | 0.75              | 1.50                                                                           | 0.25               | 0.75    | 0.75    | 0.75    | 0.25    | 1.50    | 0.50    | 1.50    | 0.25    | 1.50    | 1.50    |         |         |         |         |         |         |         |         |         |         |         |         |         |         |         |                        |      |      |      |      |      |      |      |      |      |      |       |      |      |      |      |      |      |      |      |      |      |       |      |      |      |                      |      |      |      |       |      |      |       |      |       |       |       |       |       |       |       |       |       |       |       |       |       |        |       |       |       |       |      |      |      |      |      |      |      |      |      |       |      |      |      |      |      |      |      |      |      |      |      |      |      |      |      |          |   |   |    |    |    |     |        |   |    |    |    |    |    |        |     |     |    |        |    |        |    |        |    |    |  |           |      |  |      |      |       |      |       |      |       |  |      |     |      |     |       |     |      |      |      |     |      |     |      |     |      |
| Ion-type                                                                                                                                                                                                                                                                                                                                                                                                                                                                                                                                                                                                                                                                                                                                                                                                                                                                                                                                                                                                                                                                                                                                                                                                                                                                                                                                                                                                                                                                                                                                                                                                                                                                                                                                                                                                                                                                                                                                                                                                                                                                                                                                                                                                                                                                                                                                                                                                                                                                                                              | V      | E       | KQ     | LI               | a1             | RKQ                | y1-NH3                          | Y                          | y1                          | a2                 | VE      | b2          | y2                | b3-H2O                                                                         | EGY                | LLE     | Ek      | b4-H2O  | y4      | y5-H2O  | y5      | b5-H2O  | y6      | y7      |         |         |         |         |         |         |         |         |         |         |         |         |         |         |         |         |                        |      |      |      |      |      |      |      |      |      |      |       |      |      |      |      |      |      |      |      |      |      |       |      |      |      |                      |      |      |      |       |      |      |       |      |       |       |       |       |       |       |       |       |       |       |       |       |       |        |       |       |       |       |      |      |      |      |      |      |      |      |      |       |      |      |      |      |      |      |      |      |      |      |      |      |      |      |      |          |   |   |    |    |    |     |        |   |    |    |    |    |    |        |     |     |    |        |    |        |    |        |    |    |  |           |      |  |      |      |       |      |       |      |       |  |      |     |      |     |       |     |      |      |      |     |      |     |      |     |      |
| Delta ppm                                                                                                                                                                                                                                                                                                                                                                                                                                                                                                                                                                                                                                                                                                                                                                                                                                                                                                                                                                                                                                                                                                                                                                                                                                                                                                                                                                                                                                                                                                                                                                                                                                                                                                                                                                                                                                                                                                                                                                                                                                                                                                                                                                                                                                                                                                                                                                                                                                                                                                             | -5.2   |         | -8.0   | -8.4             | -12.3          | -8.8               | -19.6                           | -9.5                       | -13.6                       |                    | -1.9    | 1.4         | -1.8              | 1.3                                                                            | -10.7              | 4.4     | 29.2    | -5.8    | 14.0    | 7.2     | 11.5    | 0.9     | -2.8    | 1.8     | -3.7    |         |         |         |         |         |         |         |         |         |         |         |         |         |         |         |                        |      |      |      |      |      |      |      |      |      |      |       |      |      |      |      |      |      |      |      |      |      |       |      |      |      |                      |      |      |      |       |      |      |       |      |       |       |       |       |       |       |       |       |       |       |       |       |       |        |       |       |       |       |      |      |      |      |      |      |      |      |      |       |      |      |      |      |      |      |      |      |      |      |      |      |      |      |      |          |   |   |    |    |    |     |        |   |    |    |    |    |    |        |     |     |    |        |    |        |    |        |    |    |  |           |      |  |      |      |       |      |       |      |       |  |      |     |      |     |       |     |      |      |      |     |      |     |      |     |      |

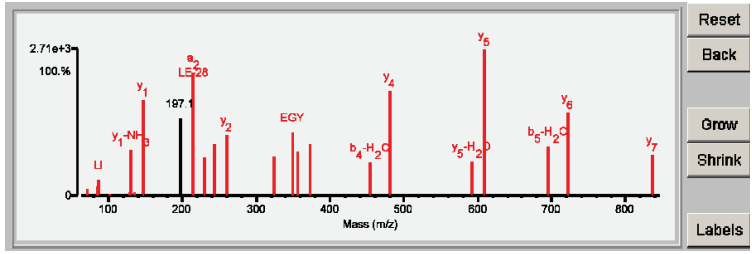

Result Summary

| Rank | Score | SPI (%) | BCS | # Unmatched Ions | Variable sites | Sequence                  | MH <sup>+</sup> Calculated (Da) | MH <sup>+</sup> Error (Da) | MH <sup>+</sup> Error (ppm) | Protein MW/pl (Da) | Species | Accession #             | Protein Name                                                                           |
|------|-------|---------|-----|------------------|----------------|---------------------------|---------------------------------|----------------------------|-----------------------------|--------------------|---------|-------------------------|----------------------------------------------------------------------------------------|
| 1    | 11.75 | 77.9    | 5   | 13/25            | K289k          | (R) <u>SLPESLkR</u> (I)   | 1042.6255                       | 114.0282                   | -12.7                       | 187149.1/6.02      | HUMAN   | <a href="#">P01024</a>  | Complement C3 OS=Homo sapiens GN=C3 PE=1 SV=2                                          |
| 2    | 11.56 | 74.7    | 4   | 11/25            | None           | (R) <u>YTLQIEGLQR</u> (R) | 1156.6684                       | -0.0147                    | -12.7                       | 100036.0/8.68      | HUMAN   | <a href="#">RA0FGR9</a> | REVERSE Extended synaptotagmin-3 OS=Homo sapiens GN=FAM62C PE=2 SV=1                   |
| 3    | 11.21 | 76.8    | 4   | 12/25            | None           | (R) <u>SLAQTLTPR</u> (G)  | 1156.6684                       | -0.0147                    | -12.7                       | 154689.8/8.31      | HUMAN   | <a href="#">Q6F5E8</a>  | Leucine-rich repeat-containing protein 16C OS=Homo sapiens GN=RLTPR PE=1 SV=2          |
| 4    | 10.19 | 76.7    | 4   | 14/25            | K1665k K1669k  | (K) <u>LSLPkAGDk</u> (V)  | 928.5462                        | 228.1075                   | 18.7                        | 226356.8/8.39      | HUMAN   | <a href="#">RO60293</a> | REVERSE Zinc finger C3H1 domain-containing protein OS=Homo sapiens GN=ZFC3H1 PE=1 SV=3 |
| 5    | 9.03  | 72.6    | 3   | 14/25            | None           | (R) <u>LSLEGERQPK</u> (S) | 1156.6321                       | 0.0217                     | 18.7                        | 213620.7/7.15      | HUMAN   | <a href="#">P35658</a>  | Nuclear pore complex protein Nup214 OS=Homo sapiens GN=NUP214 PE=1 SV=2                |

Detailed Results

| Rank | Score | SPI (%) | BCS | # Unmatched Ions | Variable sites | Sequence                  | MH <sup>+</sup> Calculated (Da) | MH <sup>+</sup> Error (Da) | MH <sup>+</sup> Error (ppm) | Protein MW/pl (Da) | Species | Accession #            | MS-Digest Index #      | Protein Name                                  |
|------|-------|---------|-----|------------------|----------------|---------------------------|---------------------------------|----------------------------|-----------------------------|--------------------|---------|------------------------|------------------------|-----------------------------------------------|
| 1    | 11.75 | 77.9    | 5   | 13/25            | K289k          | (R) I/S L/P/E S L k/R (I) | 1042.6255                       | 114.0282                   | -12.7                       | 187149.1/6.02      | HUMAN   | <a href="#">P01024</a> | <a href="#">111117</a> | Complement C3 OS=Homo sapiens GN=C3 PE=1 SV=2 |

  

| Fragment-ion (m/z)      | 70.064 | 72.079 | 84.080 | 86.095 | 87.100 | 115.087 | 136.073 | 173.128 | 175.120 | 201.122 | 230.091 | 246.142 | 258.087 | 296.197             | 360.200 | 371.179 | 399.160 | 422.229 <sup>+2</sup> | 473.283 | 478.771 <sup>+2</sup> | 586.364 | 746.407 | 843.452 | 956.526 | 1043.580 |
|-------------------------|--------|--------|--------|--------|--------|---------|---------|---------|---------|---------|---------|---------|---------|---------------------|---------|---------|---------|-----------------------|---------|-----------------------|---------|---------|---------|---------|----------|
| Frac. Inten. (% of TIC) | 0.01   | 1.47   | 1.20   | 20.23  | 1.11   | 1.01    | 1.91    | 1.86    | 1.23    | 1.45    | 1.20    | 0.97    | 2.38    | 2.44                | 1.55    | 1.91    | 0.97    | 23.13                 | 3.52    | 4.65                  | 2.88    | 4.98    | 15.81   | 1.07    | 1.08     |
| Rel. Inten. (% of BP)   | 0.02   | 6.37   | 5.20   | 87.48  | 4.79   | 4.37    | 8.26    | 8.04    | 5.31    | 6.25    | 5.20    | 4.19    | 10.31   | 10.55               | 6.69    | 8.25    | 4.19    | 100.00                | 15.21   | 20.10                 | 12.46   | 21.53   | 68.35   | 4.64    | 4.66     |
| Score                   | 0.20   | -0.06  | -0.05  | 0.50   | -0.05  | -0.04   | -0.08   | 0.50    | 1.50    | 0.75    | -0.05   | -0.04   | -0.10   | 0.25                | -0.07   | -0.08   | -0.04   | 1.50                  | -0.15   | 1.50                  | -0.12   | 1.50    | 1.50    | 1.50    | 1.50     |
| Ion-type                | PR     |        |        | a1     |        |         |         | a2      | y1      | b2      |         |         |         | b3+H <sub>2</sub> O |         |         |         | y6 <sup>+2</sup>      |         | y7 <sup>+2</sup>      |         | y5      | y6      | y7      | y8       |
| Delta ppm               | -17.5  |        |        | -24.7  |        |         |         | -7.8    | 8.3     | -11.8   |         |         |         | -4.3                |         |         |         | -19.6                 |         | -18.9                 |         | -11.2   | -19.8   | -27.4   | -4.3     |

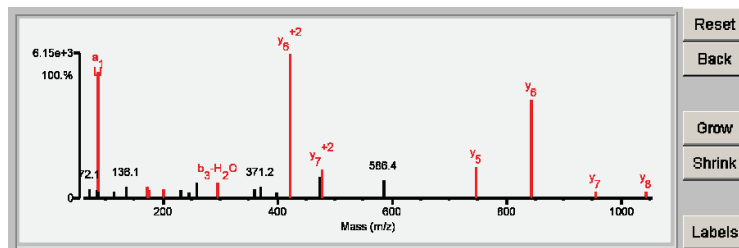

Result Summary

| Rank | Score | SPI (%) | BCS | # Unmatched Ions | Variable sites | Sequence             | MH <sup>+</sup> Calculated (Da) | MH <sup>+</sup> Error (Da) | MH <sup>+</sup> Error (ppm) | Protein MW (Da) | Species | Accession # | Protein Name                                                          |
|------|-------|---------|-----|------------------|----------------|----------------------|---------------------------------|----------------------------|-----------------------------|-----------------|---------|-------------|-----------------------------------------------------------------------|
| 1    | 13.83 | 78.5    | 8   | 8/25             | K243k          | (K)VQQLPKYTSQIVGR(F) | 1616.9119                       | 114.0425                   | -0.3                        | 47873.4/6.19    | HUMAN   | Q9UN52      | COP9 signalosome complex subunit 3 OS=Homo sapiens GN=COPS3 PE=1 SV=3 |

Detailed Results

| Rank                   | Score  | SPI (%) | BCS    | # Unmatched Ions | Variable sites | Sequence             | MH <sup>+</sup> Calculated (Da) | MH <sup>+</sup> Error (Da) | MH <sup>+</sup> Error (ppm) | Protein MW (Da) | Species | Accession # | MS-Digest Index # | Protein Name                                                          |         |         |         |         |         |                       |         |                       |                       |         |         |       |
|------------------------|--------|---------|--------|------------------|----------------|----------------------|---------------------------------|----------------------------|-----------------------------|-----------------|---------|-------------|-------------------|-----------------------------------------------------------------------|---------|---------|---------|---------|---------|-----------------------|---------|-----------------------|-----------------------|---------|---------|-------|
| 1                      | 13.83  | 78.5    | 8      | 8/25             | K243k          | (K)VQQLPKYTSQIVGR(F) | 1616.9119                       | 114.0425                   | -0.3                        | 47873.4/6.19    | HUMAN   | Q9UN52      | 64255             | COP9 signalosome complex subunit 3 OS=Homo sapiens GN=COPS3 PE=1 SV=3 |         |         |         |         |         |                       |         |                       |                       |         |         |       |
| Fragment-Ion (m/z)     | 72.079 | 84.041  | 84.078 | 86.094           | 121.078        | 132.084              | 141.099                         | 185.154                    | 200.134                     | 211.103         | 214.150 | 228.132     | 331.206           | 338.160                                                               | 356.188 | 382.211 | 444.282 | 453.278 | 469.280 | 631.847 <sup>+2</sup> | 659.408 | 688.394 <sup>+2</sup> | 743.418 <sup>+2</sup> | 760.431 | 923.483 |       |
| Frac. Inten.(% of TIC) | 0.22   | 2.52    | 0.33   | 0.19             | 2.53           | 2.49                 | 3.32                            | 2.80                       | 2.71                        | 3.09            | 3.13    | 6.16        | 5.66              | 3.47                                                                  | 8.71    | 2.74    | 5.14    | 2.82    | 4.09    | 16.55                 | 6.09    | 2.72                  | 3.58                  | 4.22    | 4.73    |       |
| Rel. Inten.(% of BP)   | 1.32   | 15.21   | 2.01   | 1.14             | 15.31          | 15.03                | 20.08                           | 16.90                      | 16.36                       | 18.68           | 18.92   | 37.20       | 34.20             | 20.93                                                                 | 52.60   | 16.52   | 31.03   | 17.04   | 24.69   | 100.00                | 36.76   | 16.44                 | 21.61                 | 25.48   | 28.60   |       |
| Score                  | 0.50   | -0.15   | 0.50   | 0.22             | -0.15          | -0.15                | -0.20                           | -0.17                      | 0.50                        | 0.25            | -0.19   | 0.50        | 1.50              | -0.21                                                                 | 0.50    | -0.17   | 1.50    | 0.75    | 0.50    | 1.50                  | 1.50    | 1.50                  | 1.50                  | 1.50    | 1.50    |       |
| Ion-type               | a1     |         | KQ     | LI               |                |                      | a2                              |                            | b2-NH3                      |                 | b2      | y3          |                   |                                                                       | b3      |         | y4      | LPk     | b4      |                       | y6      | y11 <sup>+2</sup>     | y12-H2O <sup>+2</sup> | y7      | y8      |       |
| Delta ppm              | -42.6  |         | -28.3  | -22.4            |                |                      |                                 |                            | -30.2                       |                 | -26.1   | -13.9       | -8.5              |                                                                       | -15.6   |         | -23.8   | -12.1   | 3.8     |                       | 1.9     | 36.9                  | 8.2                   | 7.9     | 0.0     | -12.0 |
|                        | 0.50   |         |        |                  |                |                      |                                 |                            |                             |                 |         |             |                   |                                                                       |         |         |         |         |         |                       |         |                       |                       |         |         |       |
|                        | V      |         |        |                  |                |                      |                                 |                            |                             |                 |         |             |                   |                                                                       |         |         |         |         |         |                       |         |                       |                       |         |         |       |
|                        | -27.4  |         |        |                  |                |                      |                                 |                            |                             |                 |         |             |                   |                                                                       |         |         |         |         |         |                       |         |                       |                       |         |         |       |

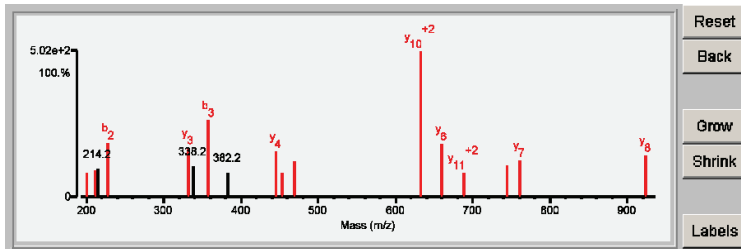



Result Summary

| Rank | Score | SPI (%) | BCS | # Unmatched Ions | Variable sites | Sequence                    | MH <sup>+</sup> Calculated (Da) | MH <sup>+</sup> Error (Da) | MH <sup>+</sup> Error (ppm) | Protein MW/pi (Da) | Species | Accession #            | Protein Name                                                |
|------|-------|---------|-----|------------------|----------------|-----------------------------|---------------------------------|----------------------------|-----------------------------|--------------------|---------|------------------------|-------------------------------------------------------------|
| 1    | 19.49 | 84.5    | 9   | 4/25             | K116k          | (K)GVTIASGGVLPNIHPPELLAK(R) | 2114.2332                       | 114.0746                   | 14.2                        | 39617.3/9.80       | HUMAN   | <a href="#">O75367</a> | Core histone macro-H2A.1 OS=Homo sapiens GN=H2AFY PE=1 SV=4 |
| 2    | 17.82 | 81.0    | 8   | 5/25             | K117k          | (K)GVTIASGGVLPNIHPPELLAK(R) | 2114.2332                       | 114.0746                   | 14.2                        | 39617.3/9.80       | HUMAN   | <a href="#">O75367</a> | Core histone macro-H2A.1 OS=Homo sapiens GN=H2AFY PE=1 SV=4 |

Detailed Results

| Rank                                                                                                                                                                                                                                                                                                                                                                                                                                                                                                                                                                                                                                                                                                                                                                                                                                                                                                                                                                                                                                                                                                                                                                                                                                                                                                                                                                                                                                                                                                                                                                                                                                                                                                                                                                                                                                                                                                                                                                                                                                                                                                                                                                                                                                                                                                                                                                                                                                                                                                                                                                                                                                                                                                                         | Score  | SPI (%) | BCS              | # Unmatched Ions | Variable sites | Sequence                    | MH <sup>+</sup> Calculated (Da) | MH <sup>+</sup> Error (Da) | MH <sup>+</sup> Error (ppm) | Protein MW/pi (Da) | Species | Accession #            | MS-Digest Index #      | Protein Name                                                |                    |                |         |                               |                |         |                              |                |                               |                               |                |         |         |         |         |         |         |         |                       |         |         |                       |         |                       |                       |         |                         |      |      |      |      |      |      |      |      |      |       |      |      |      |      |      |      |      |      |      |      |      |      |       |      |      |                       |      |      |       |      |      |      |       |      |       |       |       |       |       |       |       |       |       |       |       |       |       |       |        |       |       |       |      |      |      |      |      |      |       |      |       |      |       |      |      |      |      |      |       |      |      |      |      |      |      |      |      |          |    |   |                  |    |    |    |  |   |  |                |  |    |                |     |     |                |  |                               |                |      |                              |                |                               |                               |                |           |      |      |     |      |     |      |  |       |  |      |  |      |       |      |       |     |  |      |      |     |      |      |     |      |     |
|------------------------------------------------------------------------------------------------------------------------------------------------------------------------------------------------------------------------------------------------------------------------------------------------------------------------------------------------------------------------------------------------------------------------------------------------------------------------------------------------------------------------------------------------------------------------------------------------------------------------------------------------------------------------------------------------------------------------------------------------------------------------------------------------------------------------------------------------------------------------------------------------------------------------------------------------------------------------------------------------------------------------------------------------------------------------------------------------------------------------------------------------------------------------------------------------------------------------------------------------------------------------------------------------------------------------------------------------------------------------------------------------------------------------------------------------------------------------------------------------------------------------------------------------------------------------------------------------------------------------------------------------------------------------------------------------------------------------------------------------------------------------------------------------------------------------------------------------------------------------------------------------------------------------------------------------------------------------------------------------------------------------------------------------------------------------------------------------------------------------------------------------------------------------------------------------------------------------------------------------------------------------------------------------------------------------------------------------------------------------------------------------------------------------------------------------------------------------------------------------------------------------------------------------------------------------------------------------------------------------------------------------------------------------------------------------------------------------------|--------|---------|------------------|------------------|----------------|-----------------------------|---------------------------------|----------------------------|-----------------------------|--------------------|---------|------------------------|------------------------|-------------------------------------------------------------|--------------------|----------------|---------|-------------------------------|----------------|---------|------------------------------|----------------|-------------------------------|-------------------------------|----------------|---------|---------|---------|---------|---------|---------|---------|-----------------------|---------|---------|-----------------------|---------|-----------------------|-----------------------|---------|-------------------------|------|------|------|------|------|------|------|------|------|-------|------|------|------|------|------|------|------|------|------|------|------|------|-------|------|------|-----------------------|------|------|-------|------|------|------|-------|------|-------|-------|-------|-------|-------|-------|-------|-------|-------|-------|-------|-------|-------|-------|--------|-------|-------|-------|------|------|------|------|------|------|-------|------|-------|------|-------|------|------|------|------|------|-------|------|------|------|------|------|------|------|------|----------|----|---|------------------|----|----|----|--|---|--|----------------|--|----|----------------|-----|-----|----------------|--|-------------------------------|----------------|------|------------------------------|----------------|-------------------------------|-------------------------------|----------------|-----------|------|------|-----|------|-----|------|--|-------|--|------|--|------|-------|------|-------|-----|--|------|------|-----|------|------|-----|------|-----|
| 1                                                                                                                                                                                                                                                                                                                                                                                                                                                                                                                                                                                                                                                                                                                                                                                                                                                                                                                                                                                                                                                                                                                                                                                                                                                                                                                                                                                                                                                                                                                                                                                                                                                                                                                                                                                                                                                                                                                                                                                                                                                                                                                                                                                                                                                                                                                                                                                                                                                                                                                                                                                                                                                                                                                            | 19.49  | 84.5    | 9                | 4/25             | K116k          | (K)GVTIASGGVLPNIHPPELLAK(R) | 2114.2332                       | 114.0746                   | 14.2                        | 39617.3/9.80       | HUMAN   | <a href="#">O75367</a> | <a href="#">271841</a> | Core histone macro-H2A.1 OS=Homo sapiens GN=H2AFY PE=1 SV=4 |                    |                |         |                               |                |         |                              |                |                               |                               |                |         |         |         |         |         |         |         |                       |         |         |                       |         |                       |                       |         |                         |      |      |      |      |      |      |      |      |      |       |      |      |      |      |      |      |      |      |      |      |      |      |       |      |      |                       |      |      |       |      |      |      |       |      |       |       |       |       |       |       |       |       |       |       |       |       |       |       |        |       |       |       |      |      |      |      |      |      |       |      |       |      |       |      |      |      |      |      |       |      |      |      |      |      |      |      |      |          |    |   |                  |    |    |    |  |   |  |                |  |    |                |     |     |                |  |                               |                |      |                              |                |                               |                               |                |           |      |      |     |      |     |      |  |       |  |      |  |      |       |      |       |     |  |      |      |     |      |      |     |      |     |
| <table border="1"> <thead> <tr> <th>Fragment-ion (m/z)</th> <th>70.065</th> <th>72.081</th> <th>74.061</th> <th>84.081</th> <th>86.097</th> <th>87.058</th> <th>87.098</th> <th>110.069</th> <th>120.078</th> <th>129.101</th> <th>187.145</th> <th>212.104</th> <th>258.143</th> <th>325.185</th> <th>340.182</th> <th>389.254</th> <th>440.252</th> <th>458.611<sup>+3</sup></th> <th>460.285</th> <th>462.249</th> <th>525.322<sup>+2</sup></th> <th>573.385</th> <th>687.402<sup>+2</sup></th> <th>743.934<sup>+2</sup></th> <th>912.556</th> </tr> </thead> <tbody> <tr> <td>Frac. Inten. (% of TIC)</td> <td>0.01</td> <td>0.70</td> <td>3.45</td> <td>0.39</td> <td>0.68</td> <td>0.08</td> <td>2.39</td> <td>0.14</td> <td>3.43</td> <td>13.33</td> <td>6.54</td> <td>6.09</td> <td>2.23</td> <td>4.75</td> <td>4.43</td> <td>2.80</td> <td>3.18</td> <td>3.15</td> <td>2.60</td> <td>4.03</td> <td>3.86</td> <td>2.27</td> <td>20.22</td> <td>4.48</td> <td>4.78</td> </tr> <tr> <td>Rel. Inten. (% of BP)</td> <td>0.04</td> <td>3.46</td> <td>17.07</td> <td>1.95</td> <td>3.34</td> <td>0.37</td> <td>11.82</td> <td>0.69</td> <td>16.98</td> <td>65.95</td> <td>32.34</td> <td>30.14</td> <td>11.05</td> <td>23.47</td> <td>21.91</td> <td>13.83</td> <td>15.72</td> <td>15.60</td> <td>12.84</td> <td>19.93</td> <td>19.08</td> <td>11.24</td> <td>100.00</td> <td>22.17</td> <td>23.62</td> </tr> <tr> <td>Score</td> <td>0.20</td> <td>0.50</td> <td>1.50</td> <td>0.50</td> <td>0.22</td> <td>0.33</td> <td>-0.12</td> <td>1.00</td> <td>-0.17</td> <td>0.50</td> <td>-0.32</td> <td>0.75</td> <td>0.50</td> <td>0.75</td> <td>0.75</td> <td>1.50</td> <td>-0.16</td> <td>1.50</td> <td>1.50</td> <td>0.75</td> <td>1.50</td> <td>1.50</td> <td>1.50</td> <td>1.50</td> <td>1.50</td> </tr> <tr> <td>Ion-type</td> <td>PR</td> <td>V</td> <td>y<sup>++1</sup></td> <td>KQ</td> <td>LI</td> <td>NR</td> <td></td> <td>H</td> <td></td> <td>a<sub>2</sub></td> <td></td> <td>PN</td> <td>b<sub>3</sub></td> <td>PNI</td> <td>PEL</td> <td>y<sub>2</sub></td> <td></td> <td>y<sub>11</sub><sup>+3</sup></td> <td>y<sub>3</sub></td> <td>NIHP</td> <td>y<sub>6</sub><sup>+2</sup></td> <td>y<sub>4</sub></td> <td>y<sub>11</sub><sup>+2</sup></td> <td>y<sub>12</sub><sup>+2</sup></td> <td>y<sub>7</sub></td> </tr> <tr> <td>Delta ppm</td> <td>-6.1</td> <td>-2.4</td> <td>7.6</td> <td>-2.1</td> <td>2.0</td> <td>27.7</td> <td></td> <td>-18.8</td> <td></td> <td>0.50</td> <td></td> <td>-2.7</td> <td>-10.6</td> <td>-8.4</td> <td>-17.9</td> <td>8.5</td> <td></td> <td>21.4</td> <td>-6.1</td> <td>3.4</td> <td>25.5</td> <td>22.4</td> <td>5.1</td> <td>-9.5</td> <td>5.0</td> </tr> </tbody> </table> |        |         |                  |                  |                |                             |                                 |                            |                             |                    |         |                        |                        |                                                             | Fragment-ion (m/z) | 70.065         | 72.081  | 74.061                        | 84.081         | 86.097  | 87.058                       | 87.098         | 110.069                       | 120.078                       | 129.101        | 187.145 | 212.104 | 258.143 | 325.185 | 340.182 | 389.254 | 440.252 | 458.611 <sup>+3</sup> | 460.285 | 462.249 | 525.322 <sup>+2</sup> | 573.385 | 687.402 <sup>+2</sup> | 743.934 <sup>+2</sup> | 912.556 | Frac. Inten. (% of TIC) | 0.01 | 0.70 | 3.45 | 0.39 | 0.68 | 0.08 | 2.39 | 0.14 | 3.43 | 13.33 | 6.54 | 6.09 | 2.23 | 4.75 | 4.43 | 2.80 | 3.18 | 3.15 | 2.60 | 4.03 | 3.86 | 2.27 | 20.22 | 4.48 | 4.78 | Rel. Inten. (% of BP) | 0.04 | 3.46 | 17.07 | 1.95 | 3.34 | 0.37 | 11.82 | 0.69 | 16.98 | 65.95 | 32.34 | 30.14 | 11.05 | 23.47 | 21.91 | 13.83 | 15.72 | 15.60 | 12.84 | 19.93 | 19.08 | 11.24 | 100.00 | 22.17 | 23.62 | Score | 0.20 | 0.50 | 1.50 | 0.50 | 0.22 | 0.33 | -0.12 | 1.00 | -0.17 | 0.50 | -0.32 | 0.75 | 0.50 | 0.75 | 0.75 | 1.50 | -0.16 | 1.50 | 1.50 | 0.75 | 1.50 | 1.50 | 1.50 | 1.50 | 1.50 | Ion-type | PR | V | y <sup>++1</sup> | KQ | LI | NR |  | H |  | a <sub>2</sub> |  | PN | b <sub>3</sub> | PNI | PEL | y <sub>2</sub> |  | y <sub>11</sub> <sup>+3</sup> | y <sub>3</sub> | NIHP | y <sub>6</sub> <sup>+2</sup> | y <sub>4</sub> | y <sub>11</sub> <sup>+2</sup> | y <sub>12</sub> <sup>+2</sup> | y <sub>7</sub> | Delta ppm | -6.1 | -2.4 | 7.6 | -2.1 | 2.0 | 27.7 |  | -18.8 |  | 0.50 |  | -2.7 | -10.6 | -8.4 | -17.9 | 8.5 |  | 21.4 | -6.1 | 3.4 | 25.5 | 22.4 | 5.1 | -9.5 | 5.0 |
| Fragment-ion (m/z)                                                                                                                                                                                                                                                                                                                                                                                                                                                                                                                                                                                                                                                                                                                                                                                                                                                                                                                                                                                                                                                                                                                                                                                                                                                                                                                                                                                                                                                                                                                                                                                                                                                                                                                                                                                                                                                                                                                                                                                                                                                                                                                                                                                                                                                                                                                                                                                                                                                                                                                                                                                                                                                                                                           | 70.065 | 72.081  | 74.061           | 84.081           | 86.097         | 87.058                      | 87.098                          | 110.069                    | 120.078                     | 129.101            | 187.145 | 212.104                | 258.143                | 325.185                                                     | 340.182            | 389.254        | 440.252 | 458.611 <sup>+3</sup>         | 460.285        | 462.249 | 525.322 <sup>+2</sup>        | 573.385        | 687.402 <sup>+2</sup>         | 743.934 <sup>+2</sup>         | 912.556        |         |         |         |         |         |         |         |                       |         |         |                       |         |                       |                       |         |                         |      |      |      |      |      |      |      |      |      |       |      |      |      |      |      |      |      |      |      |      |      |      |       |      |      |                       |      |      |       |      |      |      |       |      |       |       |       |       |       |       |       |       |       |       |       |       |       |       |        |       |       |       |      |      |      |      |      |      |       |      |       |      |       |      |      |      |      |      |       |      |      |      |      |      |      |      |      |          |    |   |                  |    |    |    |  |   |  |                |  |    |                |     |     |                |  |                               |                |      |                              |                |                               |                               |                |           |      |      |     |      |     |      |  |       |  |      |  |      |       |      |       |     |  |      |      |     |      |      |     |      |     |
| Frac. Inten. (% of TIC)                                                                                                                                                                                                                                                                                                                                                                                                                                                                                                                                                                                                                                                                                                                                                                                                                                                                                                                                                                                                                                                                                                                                                                                                                                                                                                                                                                                                                                                                                                                                                                                                                                                                                                                                                                                                                                                                                                                                                                                                                                                                                                                                                                                                                                                                                                                                                                                                                                                                                                                                                                                                                                                                                                      | 0.01   | 0.70    | 3.45             | 0.39             | 0.68           | 0.08                        | 2.39                            | 0.14                       | 3.43                        | 13.33              | 6.54    | 6.09                   | 2.23                   | 4.75                                                        | 4.43               | 2.80           | 3.18    | 3.15                          | 2.60           | 4.03    | 3.86                         | 2.27           | 20.22                         | 4.48                          | 4.78           |         |         |         |         |         |         |         |                       |         |         |                       |         |                       |                       |         |                         |      |      |      |      |      |      |      |      |      |       |      |      |      |      |      |      |      |      |      |      |      |      |       |      |      |                       |      |      |       |      |      |      |       |      |       |       |       |       |       |       |       |       |       |       |       |       |       |       |        |       |       |       |      |      |      |      |      |      |       |      |       |      |       |      |      |      |      |      |       |      |      |      |      |      |      |      |      |          |    |   |                  |    |    |    |  |   |  |                |  |    |                |     |     |                |  |                               |                |      |                              |                |                               |                               |                |           |      |      |     |      |     |      |  |       |  |      |  |      |       |      |       |     |  |      |      |     |      |      |     |      |     |
| Rel. Inten. (% of BP)                                                                                                                                                                                                                                                                                                                                                                                                                                                                                                                                                                                                                                                                                                                                                                                                                                                                                                                                                                                                                                                                                                                                                                                                                                                                                                                                                                                                                                                                                                                                                                                                                                                                                                                                                                                                                                                                                                                                                                                                                                                                                                                                                                                                                                                                                                                                                                                                                                                                                                                                                                                                                                                                                                        | 0.04   | 3.46    | 17.07            | 1.95             | 3.34           | 0.37                        | 11.82                           | 0.69                       | 16.98                       | 65.95              | 32.34   | 30.14                  | 11.05                  | 23.47                                                       | 21.91              | 13.83          | 15.72   | 15.60                         | 12.84          | 19.93   | 19.08                        | 11.24          | 100.00                        | 22.17                         | 23.62          |         |         |         |         |         |         |         |                       |         |         |                       |         |                       |                       |         |                         |      |      |      |      |      |      |      |      |      |       |      |      |      |      |      |      |      |      |      |      |      |      |       |      |      |                       |      |      |       |      |      |      |       |      |       |       |       |       |       |       |       |       |       |       |       |       |       |       |        |       |       |       |      |      |      |      |      |      |       |      |       |      |       |      |      |      |      |      |       |      |      |      |      |      |      |      |      |          |    |   |                  |    |    |    |  |   |  |                |  |    |                |     |     |                |  |                               |                |      |                              |                |                               |                               |                |           |      |      |     |      |     |      |  |       |  |      |  |      |       |      |       |     |  |      |      |     |      |      |     |      |     |
| Score                                                                                                                                                                                                                                                                                                                                                                                                                                                                                                                                                                                                                                                                                                                                                                                                                                                                                                                                                                                                                                                                                                                                                                                                                                                                                                                                                                                                                                                                                                                                                                                                                                                                                                                                                                                                                                                                                                                                                                                                                                                                                                                                                                                                                                                                                                                                                                                                                                                                                                                                                                                                                                                                                                                        | 0.20   | 0.50    | 1.50             | 0.50             | 0.22           | 0.33                        | -0.12                           | 1.00                       | -0.17                       | 0.50               | -0.32   | 0.75                   | 0.50                   | 0.75                                                        | 0.75               | 1.50           | -0.16   | 1.50                          | 1.50           | 0.75    | 1.50                         | 1.50           | 1.50                          | 1.50                          | 1.50           |         |         |         |         |         |         |         |                       |         |         |                       |         |                       |                       |         |                         |      |      |      |      |      |      |      |      |      |       |      |      |      |      |      |      |      |      |      |      |      |      |       |      |      |                       |      |      |       |      |      |      |       |      |       |       |       |       |       |       |       |       |       |       |       |       |       |       |        |       |       |       |      |      |      |      |      |      |       |      |       |      |       |      |      |      |      |      |       |      |      |      |      |      |      |      |      |          |    |   |                  |    |    |    |  |   |  |                |  |    |                |     |     |                |  |                               |                |      |                              |                |                               |                               |                |           |      |      |     |      |     |      |  |       |  |      |  |      |       |      |       |     |  |      |      |     |      |      |     |      |     |
| Ion-type                                                                                                                                                                                                                                                                                                                                                                                                                                                                                                                                                                                                                                                                                                                                                                                                                                                                                                                                                                                                                                                                                                                                                                                                                                                                                                                                                                                                                                                                                                                                                                                                                                                                                                                                                                                                                                                                                                                                                                                                                                                                                                                                                                                                                                                                                                                                                                                                                                                                                                                                                                                                                                                                                                                     | PR     | V       | y <sup>++1</sup> | KQ               | LI             | NR                          |                                 | H                          |                             | a <sub>2</sub>     |         | PN                     | b <sub>3</sub>         | PNI                                                         | PEL                | y <sub>2</sub> |         | y <sub>11</sub> <sup>+3</sup> | y <sub>3</sub> | NIHP    | y <sub>6</sub> <sup>+2</sup> | y <sub>4</sub> | y <sub>11</sub> <sup>+2</sup> | y <sub>12</sub> <sup>+2</sup> | y <sub>7</sub> |         |         |         |         |         |         |         |                       |         |         |                       |         |                       |                       |         |                         |      |      |      |      |      |      |      |      |      |       |      |      |      |      |      |      |      |      |      |      |      |      |       |      |      |                       |      |      |       |      |      |      |       |      |       |       |       |       |       |       |       |       |       |       |       |       |       |       |        |       |       |       |      |      |      |      |      |      |       |      |       |      |       |      |      |      |      |      |       |      |      |      |      |      |      |      |      |          |    |   |                  |    |    |    |  |   |  |                |  |    |                |     |     |                |  |                               |                |      |                              |                |                               |                               |                |           |      |      |     |      |     |      |  |       |  |      |  |      |       |      |       |     |  |      |      |     |      |      |     |      |     |
| Delta ppm                                                                                                                                                                                                                                                                                                                                                                                                                                                                                                                                                                                                                                                                                                                                                                                                                                                                                                                                                                                                                                                                                                                                                                                                                                                                                                                                                                                                                                                                                                                                                                                                                                                                                                                                                                                                                                                                                                                                                                                                                                                                                                                                                                                                                                                                                                                                                                                                                                                                                                                                                                                                                                                                                                                    | -6.1   | -2.4    | 7.6              | -2.1             | 2.0            | 27.7                        |                                 | -18.8                      |                             | 0.50               |         | -2.7                   | -10.6                  | -8.4                                                        | -17.9              | 8.5            |         | 21.4                          | -6.1           | 3.4     | 25.5                         | 22.4           | 5.1                           | -9.5                          | 5.0            |         |         |         |         |         |         |         |                       |         |         |                       |         |                       |                       |         |                         |      |      |      |      |      |      |      |      |      |       |      |      |      |      |      |      |      |      |      |      |      |      |       |      |      |                       |      |      |       |      |      |      |       |      |       |       |       |       |       |       |       |       |       |       |       |       |       |       |        |       |       |       |      |      |      |      |      |      |       |      |       |      |       |      |      |      |      |      |       |      |      |      |      |      |      |      |      |          |    |   |                  |    |    |    |  |   |  |                |  |    |                |     |     |                |  |                               |                |      |                              |                |                               |                               |                |           |      |      |     |      |     |      |  |       |  |      |  |      |       |      |       |     |  |      |      |     |      |      |     |      |     |

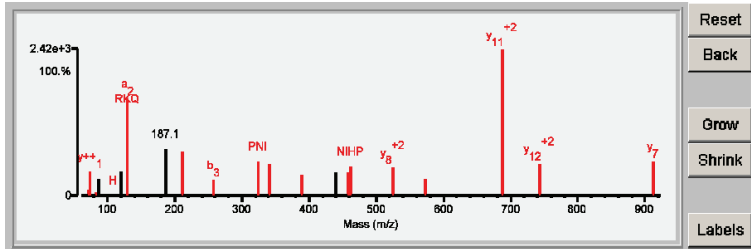

Reset

Back

Grow

Shrink

Labels

Result Summary

| Rank | Score | SPI (%) | BCS | # Unmatched ions | Variable sites | Sequence                   | MH <sup>+</sup> Calculated (Da) | MH <sup>+</sup> Error (Da) | MH <sup>+</sup> Error (ppm) | Protein MW/pl (Da) | Species | Accession #            | Protein Name                                                                                   |
|------|-------|---------|-----|------------------|----------------|----------------------------|---------------------------------|----------------------------|-----------------------------|--------------------|---------|------------------------|------------------------------------------------------------------------------------------------|
| 1    | 21.61 | 97.7    | 8   | 1/25             | K117k          | (K)GVTIASGGVLPNIHPELLAK(R) | 2114.2332                       | 114.0382                   | -2.1                        | 39617.3/9.80       | HUMAN   | <a href="#">O75367</a> | Core histone macro-H2A.1 OS=Homo sapiens GN=H2AFY PE=1 SV=4                                    |
| 1    | 21.61 | 97.7    | 8   | 1/25             | K116k          | (K)GVTIASGGVLPNIHPELLAK(R) | 2114.2332                       | 114.0382                   | -2.1                        | 39617.3/9.80       | HUMAN   | <a href="#">O75367</a> | Core histone macro-H2A.1 OS=Homo sapiens GN=H2AFY PE=1 SV=4                                    |
| 2    | 9.02  | 67.0    | 2   | 12/25            | K629k K630k    | (R)EKKIQIPFQVLTTRKR(K)     | 2000.1764                       | 228.0950                   | 4.1                         | 101736.6/5.49      | HUMAN   | <a href="#">P18868</a> | DNA ligase 1 OS=Homo sapiens GN=LIG1 PE=1 SV=1                                                 |
| 3    | 8.47  | 71.0    | 2   | 13/25            | K634k          | (R)IKGEVTLRLHHEHNR(Y)      | 2114.2193                       | 114.0521                   | 4.1                         | 186839.5/5.90      | HUMAN   | <a href="#">Q9P2K8</a> | Eukaryotic translation initiation factor 2-alpha kinase 4 OS=Homo sapiens GN=EIF2AK4 PE=1 SV=2 |
| 4    | 7.66  | 65.3    | 1   | 12/25            | None           | (K)VRLDNEKEGFPITAREIK(I)   | 2228.2397                       | 0.0316                     | 14.2                        | 164924.0/9.71      | HUMAN   | <a href="#">Q14004</a> | Cell division cycle 2-like protein kinase 5 OS=Homo sapiens GN=CDC2L5 PE=1 SV=2                |

Detailed Results

| Rank                                                                                                                                                                                                                                                                                                                                                                                                                                                                                                                                                                                                                                                                                                                                                                                                                                                                                                                                                                                                                                                                                                                                                                                                                                                                                                                                                                                                                                                                                                                                                                                                                                                                                                                                                                                                                                                                                                                                                                                                                                                                                                                                                                                                                                                                                                                                                                                                                                                                                                                                                                                                                                                                                                                                                                                                                                                                                                  | Score  | SPI (%) | BCS    | # Unmatched ions | Variable sites | Sequence                                                                                                                                                                              | MH <sup>+</sup> Calculated (Da) | MH <sup>+</sup> Error (Da) | MH <sup>+</sup> Error (ppm) | Protein MW/pl (Da) | Species | Accession #            | MS-Digest Index #            | Protein Name                                                |                    |                               |                                  |                               |                                  |                               |                               |                               |                       |                                   |                       |         |         |                       |                       |         |         |                       |         |                       |         |                       |                       |                       |         |                       |                        |      |      |      |      |       |      |      |      |      |      |      |      |      |      |      |      |      |      |       |      |      |      |      |      |      |                      |      |      |      |      |       |      |       |      |      |      |      |      |      |       |      |      |      |      |        |      |       |      |      |       |      |       |      |      |      |      |      |      |      |      |      |      |      |      |      |      |       |      |      |      |      |      |      |      |      |      |      |          |    |   |    |    |                |                |       |    |    |                |    |         |                              |                               |      |                               |                                  |                               |                                  |                               |                               |                               |                |                                   |           |      |      |     |     |      |      |    |      |       |       |     |     |      |      |     |     |     |      |      |      |      |      |     |      |     |
|-------------------------------------------------------------------------------------------------------------------------------------------------------------------------------------------------------------------------------------------------------------------------------------------------------------------------------------------------------------------------------------------------------------------------------------------------------------------------------------------------------------------------------------------------------------------------------------------------------------------------------------------------------------------------------------------------------------------------------------------------------------------------------------------------------------------------------------------------------------------------------------------------------------------------------------------------------------------------------------------------------------------------------------------------------------------------------------------------------------------------------------------------------------------------------------------------------------------------------------------------------------------------------------------------------------------------------------------------------------------------------------------------------------------------------------------------------------------------------------------------------------------------------------------------------------------------------------------------------------------------------------------------------------------------------------------------------------------------------------------------------------------------------------------------------------------------------------------------------------------------------------------------------------------------------------------------------------------------------------------------------------------------------------------------------------------------------------------------------------------------------------------------------------------------------------------------------------------------------------------------------------------------------------------------------------------------------------------------------------------------------------------------------------------------------------------------------------------------------------------------------------------------------------------------------------------------------------------------------------------------------------------------------------------------------------------------------------------------------------------------------------------------------------------------------------------------------------------------------------------------------------------------------|--------|---------|--------|------------------|----------------|---------------------------------------------------------------------------------------------------------------------------------------------------------------------------------------|---------------------------------|----------------------------|-----------------------------|--------------------|---------|------------------------|------------------------------|-------------------------------------------------------------|--------------------|-------------------------------|----------------------------------|-------------------------------|----------------------------------|-------------------------------|-------------------------------|-------------------------------|-----------------------|-----------------------------------|-----------------------|---------|---------|-----------------------|-----------------------|---------|---------|-----------------------|---------|-----------------------|---------|-----------------------|-----------------------|-----------------------|---------|-----------------------|------------------------|------|------|------|------|-------|------|------|------|------|------|------|------|------|------|------|------|------|------|-------|------|------|------|------|------|------|----------------------|------|------|------|------|-------|------|-------|------|------|------|------|------|------|-------|------|------|------|------|--------|------|-------|------|------|-------|------|-------|------|------|------|------|------|------|------|------|------|------|------|------|------|------|-------|------|------|------|------|------|------|------|------|------|------|----------|----|---|----|----|----------------|----------------|-------|----|----|----------------|----|---------|------------------------------|-------------------------------|------|-------------------------------|----------------------------------|-------------------------------|----------------------------------|-------------------------------|-------------------------------|-------------------------------|----------------|-----------------------------------|-----------|------|------|-----|-----|------|------|----|------|-------|-------|-----|-----|------|------|-----|-----|-----|------|------|------|------|------|-----|------|-----|
| 1                                                                                                                                                                                                                                                                                                                                                                                                                                                                                                                                                                                                                                                                                                                                                                                                                                                                                                                                                                                                                                                                                                                                                                                                                                                                                                                                                                                                                                                                                                                                                                                                                                                                                                                                                                                                                                                                                                                                                                                                                                                                                                                                                                                                                                                                                                                                                                                                                                                                                                                                                                                                                                                                                                                                                                                                                                                                                                     | 21.61  | 97.7    | 8      | 1/25             | K117k          | (K)GV <sup>+</sup> TI <sup>+</sup> AS <sup>+</sup> GG <sup>+</sup> VL <sup>+</sup> PN <sup>+</sup> I <sup>+</sup> H <sup>+</sup> PE <sup>+</sup> LL <sup>+</sup> AK <sup>+</sup> k(R) | 2114.2332                       | 114.0382                   | -2.1                        | 39617.3/9.80       | HUMAN   | <a href="#">O75367</a> | <a href="#">271841</a>       | Core histone macro-H2A.1 OS=Homo sapiens GN=H2AFY PE=1 SV=4 |                    |                               |                                  |                               |                                  |                               |                               |                               |                       |                                   |                       |         |         |                       |                       |         |         |                       |         |                       |         |                       |                       |                       |         |                       |                        |      |      |      |      |       |      |      |      |      |      |      |      |      |      |      |      |      |      |       |      |      |      |      |      |      |                      |      |      |      |      |       |      |       |      |      |      |      |      |      |       |      |      |      |      |        |      |       |      |      |       |      |       |      |      |      |      |      |      |      |      |      |      |      |      |      |      |       |      |      |      |      |      |      |      |      |      |      |          |    |   |    |    |                |                |       |    |    |                |    |         |                              |                               |      |                               |                                  |                               |                                  |                               |                               |                               |                |                                   |           |      |      |     |     |      |      |    |      |       |       |     |     |      |      |     |     |     |      |      |      |      |      |     |      |     |
| <table border="1"> <thead> <tr> <th>Fragment-ion (m/z)</th> <th>70.065</th> <th>72.082</th> <th>84.081</th> <th>86.097</th> <th>129.102</th> <th>157.098</th> <th>187.144</th> <th>212.102</th> <th>215.137</th> <th>258.146</th> <th>325.190</th> <th>434.252</th> <th>456.777<sup>+2</sup></th> <th>458.604<sup>+3</sup></th> <th>459.271</th> <th>462.248</th> <th>496.298<sup>+3</sup></th> <th>625.329</th> <th>687.397<sup>+2</sup></th> <th>724.397</th> <th>743.939<sup>+2</sup></th> <th>850.490<sup>+2</sup></th> <th>894.019<sup>+2</sup></th> <th>912.548</th> <th>929.534<sup>+2</sup></th> </tr> </thead> <tbody> <tr> <td>Frac. Inten.(% of TIC)</td> <td>0.00</td> <td>0.21</td> <td>0.08</td> <td>0.57</td> <td>10.28</td> <td>2.33</td> <td>5.70</td> <td>2.19</td> <td>1.98</td> <td>1.55</td> <td>2.55</td> <td>1.74</td> <td>1.92</td> <td>4.64</td> <td>2.33</td> <td>2.69</td> <td>2.22</td> <td>2.14</td> <td>34.71</td> <td>2.87</td> <td>5.52</td> <td>1.55</td> <td>1.79</td> <td>5.72</td> <td>2.71</td> </tr> <tr> <td>Rel. Inten.(% of BP)</td> <td>0.01</td> <td>0.60</td> <td>0.22</td> <td>1.64</td> <td>29.60</td> <td>6.72</td> <td>16.43</td> <td>6.32</td> <td>5.71</td> <td>4.46</td> <td>7.36</td> <td>5.02</td> <td>5.53</td> <td>13.37</td> <td>6.70</td> <td>7.76</td> <td>6.40</td> <td>6.16</td> <td>100.00</td> <td>8.26</td> <td>15.90</td> <td>4.47</td> <td>5.16</td> <td>16.46</td> <td>7.81</td> </tr> <tr> <td>Score</td> <td>0.20</td> <td>0.50</td> <td>0.50</td> <td>0.22</td> <td>0.50</td> <td>0.75</td> <td>0.50</td> <td>0.75</td> <td>0.75</td> <td>0.50</td> <td>0.75</td> <td>0.50</td> <td>1.50</td> <td>1.50</td> <td>-0.07</td> <td>0.75</td> <td>1.50</td> <td>0.75</td> <td>1.50</td> <td>0.25</td> <td>1.50</td> <td>1.50</td> <td>1.50</td> <td>1.50</td> <td>1.50</td> </tr> <tr> <td>Ion-type</td> <td>PR</td> <td>V</td> <td>KQ</td> <td>LI</td> <td>b<sub>2</sub></td> <td>b<sub>2</sub></td> <td>TI-28</td> <td>PN</td> <td>TI</td> <td>b<sub>3</sub></td> <td>PN</td> <td>NIHP-28</td> <td>y<sub>7</sub><sup>+2</sup></td> <td>y<sub>11</sub><sup>+3</sup></td> <td>NIHP</td> <td>y<sub>12</sub><sup>+3</sup></td> <td>b<sub>8</sub>-H<sub>2</sub>O</td> <td>y<sub>11</sub><sup>+2</sup></td> <td>b<sub>9</sub>-H<sub>2</sub>O</td> <td>y<sub>12</sub><sup>+2</sup></td> <td>y<sub>15</sub><sup>+2</sup></td> <td>y<sub>16</sub><sup>+2</sup></td> <td>y<sub>7</sub></td> <td>b<sub>19</sub>+H<sub>2</sub>O</td> </tr> <tr> <td>Delta ppm</td> <td>-0.4</td> <td>11.4</td> <td>7.4</td> <td>7.8</td> <td>-7.3</td> <td>-1.6</td> <td>GV</td> <td>-1.6</td> <td>-10.2</td> <td>-15.4</td> <td>1.8</td> <td>7.0</td> <td>-1.4</td> <td>-6.1</td> <td>4.6</td> <td>1.4</td> <td>3.8</td> <td>-3.8</td> <td>-2.2</td> <td>-3.6</td> <td>-2.0</td> <td>-8.0</td> <td>7.2</td> <td>-3.1</td> <td>3.8</td> </tr> </tbody> </table> |        |         |        |                  |                |                                                                                                                                                                                       |                                 |                            |                             |                    |         |                        |                              |                                                             | Fragment-ion (m/z) | 70.065                        | 72.082                           | 84.081                        | 86.097                           | 129.102                       | 157.098                       | 187.144                       | 212.102               | 215.137                           | 258.146               | 325.190 | 434.252 | 456.777 <sup>+2</sup> | 458.604 <sup>+3</sup> | 459.271 | 462.248 | 496.298 <sup>+3</sup> | 625.329 | 687.397 <sup>+2</sup> | 724.397 | 743.939 <sup>+2</sup> | 850.490 <sup>+2</sup> | 894.019 <sup>+2</sup> | 912.548 | 929.534 <sup>+2</sup> | Frac. Inten.(% of TIC) | 0.00 | 0.21 | 0.08 | 0.57 | 10.28 | 2.33 | 5.70 | 2.19 | 1.98 | 1.55 | 2.55 | 1.74 | 1.92 | 4.64 | 2.33 | 2.69 | 2.22 | 2.14 | 34.71 | 2.87 | 5.52 | 1.55 | 1.79 | 5.72 | 2.71 | Rel. Inten.(% of BP) | 0.01 | 0.60 | 0.22 | 1.64 | 29.60 | 6.72 | 16.43 | 6.32 | 5.71 | 4.46 | 7.36 | 5.02 | 5.53 | 13.37 | 6.70 | 7.76 | 6.40 | 6.16 | 100.00 | 8.26 | 15.90 | 4.47 | 5.16 | 16.46 | 7.81 | Score | 0.20 | 0.50 | 0.50 | 0.22 | 0.50 | 0.75 | 0.50 | 0.75 | 0.75 | 0.50 | 0.75 | 0.50 | 1.50 | 1.50 | -0.07 | 0.75 | 1.50 | 0.75 | 1.50 | 0.25 | 1.50 | 1.50 | 1.50 | 1.50 | 1.50 | Ion-type | PR | V | KQ | LI | b <sub>2</sub> | b <sub>2</sub> | TI-28 | PN | TI | b <sub>3</sub> | PN | NIHP-28 | y <sub>7</sub> <sup>+2</sup> | y <sub>11</sub> <sup>+3</sup> | NIHP | y <sub>12</sub> <sup>+3</sup> | b <sub>8</sub> -H <sub>2</sub> O | y <sub>11</sub> <sup>+2</sup> | b <sub>9</sub> -H <sub>2</sub> O | y <sub>12</sub> <sup>+2</sup> | y <sub>15</sub> <sup>+2</sup> | y <sub>16</sub> <sup>+2</sup> | y <sub>7</sub> | b <sub>19</sub> +H <sub>2</sub> O | Delta ppm | -0.4 | 11.4 | 7.4 | 7.8 | -7.3 | -1.6 | GV | -1.6 | -10.2 | -15.4 | 1.8 | 7.0 | -1.4 | -6.1 | 4.6 | 1.4 | 3.8 | -3.8 | -2.2 | -3.6 | -2.0 | -8.0 | 7.2 | -3.1 | 3.8 |
| Fragment-ion (m/z)                                                                                                                                                                                                                                                                                                                                                                                                                                                                                                                                                                                                                                                                                                                                                                                                                                                                                                                                                                                                                                                                                                                                                                                                                                                                                                                                                                                                                                                                                                                                                                                                                                                                                                                                                                                                                                                                                                                                                                                                                                                                                                                                                                                                                                                                                                                                                                                                                                                                                                                                                                                                                                                                                                                                                                                                                                                                                    | 70.065 | 72.082  | 84.081 | 86.097           | 129.102        | 157.098                                                                                                                                                                               | 187.144                         | 212.102                    | 215.137                     | 258.146            | 325.190 | 434.252                | 456.777 <sup>+2</sup>        | 458.604 <sup>+3</sup>                                       | 459.271            | 462.248                       | 496.298 <sup>+3</sup>            | 625.329                       | 687.397 <sup>+2</sup>            | 724.397                       | 743.939 <sup>+2</sup>         | 850.490 <sup>+2</sup>         | 894.019 <sup>+2</sup> | 912.548                           | 929.534 <sup>+2</sup> |         |         |                       |                       |         |         |                       |         |                       |         |                       |                       |                       |         |                       |                        |      |      |      |      |       |      |      |      |      |      |      |      |      |      |      |      |      |      |       |      |      |      |      |      |      |                      |      |      |      |      |       |      |       |      |      |      |      |      |      |       |      |      |      |      |        |      |       |      |      |       |      |       |      |      |      |      |      |      |      |      |      |      |      |      |      |      |       |      |      |      |      |      |      |      |      |      |      |          |    |   |    |    |                |                |       |    |    |                |    |         |                              |                               |      |                               |                                  |                               |                                  |                               |                               |                               |                |                                   |           |      |      |     |     |      |      |    |      |       |       |     |     |      |      |     |     |     |      |      |      |      |      |     |      |     |
| Frac. Inten.(% of TIC)                                                                                                                                                                                                                                                                                                                                                                                                                                                                                                                                                                                                                                                                                                                                                                                                                                                                                                                                                                                                                                                                                                                                                                                                                                                                                                                                                                                                                                                                                                                                                                                                                                                                                                                                                                                                                                                                                                                                                                                                                                                                                                                                                                                                                                                                                                                                                                                                                                                                                                                                                                                                                                                                                                                                                                                                                                                                                | 0.00   | 0.21    | 0.08   | 0.57             | 10.28          | 2.33                                                                                                                                                                                  | 5.70                            | 2.19                       | 1.98                        | 1.55               | 2.55    | 1.74                   | 1.92                         | 4.64                                                        | 2.33               | 2.69                          | 2.22                             | 2.14                          | 34.71                            | 2.87                          | 5.52                          | 1.55                          | 1.79                  | 5.72                              | 2.71                  |         |         |                       |                       |         |         |                       |         |                       |         |                       |                       |                       |         |                       |                        |      |      |      |      |       |      |      |      |      |      |      |      |      |      |      |      |      |      |       |      |      |      |      |      |      |                      |      |      |      |      |       |      |       |      |      |      |      |      |      |       |      |      |      |      |        |      |       |      |      |       |      |       |      |      |      |      |      |      |      |      |      |      |      |      |      |      |       |      |      |      |      |      |      |      |      |      |      |          |    |   |    |    |                |                |       |    |    |                |    |         |                              |                               |      |                               |                                  |                               |                                  |                               |                               |                               |                |                                   |           |      |      |     |     |      |      |    |      |       |       |     |     |      |      |     |     |     |      |      |      |      |      |     |      |     |
| Rel. Inten.(% of BP)                                                                                                                                                                                                                                                                                                                                                                                                                                                                                                                                                                                                                                                                                                                                                                                                                                                                                                                                                                                                                                                                                                                                                                                                                                                                                                                                                                                                                                                                                                                                                                                                                                                                                                                                                                                                                                                                                                                                                                                                                                                                                                                                                                                                                                                                                                                                                                                                                                                                                                                                                                                                                                                                                                                                                                                                                                                                                  | 0.01   | 0.60    | 0.22   | 1.64             | 29.60          | 6.72                                                                                                                                                                                  | 16.43                           | 6.32                       | 5.71                        | 4.46               | 7.36    | 5.02                   | 5.53                         | 13.37                                                       | 6.70               | 7.76                          | 6.40                             | 6.16                          | 100.00                           | 8.26                          | 15.90                         | 4.47                          | 5.16                  | 16.46                             | 7.81                  |         |         |                       |                       |         |         |                       |         |                       |         |                       |                       |                       |         |                       |                        |      |      |      |      |       |      |      |      |      |      |      |      |      |      |      |      |      |      |       |      |      |      |      |      |      |                      |      |      |      |      |       |      |       |      |      |      |      |      |      |       |      |      |      |      |        |      |       |      |      |       |      |       |      |      |      |      |      |      |      |      |      |      |      |      |      |      |       |      |      |      |      |      |      |      |      |      |      |          |    |   |    |    |                |                |       |    |    |                |    |         |                              |                               |      |                               |                                  |                               |                                  |                               |                               |                               |                |                                   |           |      |      |     |     |      |      |    |      |       |       |     |     |      |      |     |     |     |      |      |      |      |      |     |      |     |
| Score                                                                                                                                                                                                                                                                                                                                                                                                                                                                                                                                                                                                                                                                                                                                                                                                                                                                                                                                                                                                                                                                                                                                                                                                                                                                                                                                                                                                                                                                                                                                                                                                                                                                                                                                                                                                                                                                                                                                                                                                                                                                                                                                                                                                                                                                                                                                                                                                                                                                                                                                                                                                                                                                                                                                                                                                                                                                                                 | 0.20   | 0.50    | 0.50   | 0.22             | 0.50           | 0.75                                                                                                                                                                                  | 0.50                            | 0.75                       | 0.75                        | 0.50               | 0.75    | 0.50                   | 1.50                         | 1.50                                                        | -0.07              | 0.75                          | 1.50                             | 0.75                          | 1.50                             | 0.25                          | 1.50                          | 1.50                          | 1.50                  | 1.50                              | 1.50                  |         |         |                       |                       |         |         |                       |         |                       |         |                       |                       |                       |         |                       |                        |      |      |      |      |       |      |      |      |      |      |      |      |      |      |      |      |      |      |       |      |      |      |      |      |      |                      |      |      |      |      |       |      |       |      |      |      |      |      |      |       |      |      |      |      |        |      |       |      |      |       |      |       |      |      |      |      |      |      |      |      |      |      |      |      |      |      |       |      |      |      |      |      |      |      |      |      |      |          |    |   |    |    |                |                |       |    |    |                |    |         |                              |                               |      |                               |                                  |                               |                                  |                               |                               |                               |                |                                   |           |      |      |     |     |      |      |    |      |       |       |     |     |      |      |     |     |     |      |      |      |      |      |     |      |     |
| Ion-type                                                                                                                                                                                                                                                                                                                                                                                                                                                                                                                                                                                                                                                                                                                                                                                                                                                                                                                                                                                                                                                                                                                                                                                                                                                                                                                                                                                                                                                                                                                                                                                                                                                                                                                                                                                                                                                                                                                                                                                                                                                                                                                                                                                                                                                                                                                                                                                                                                                                                                                                                                                                                                                                                                                                                                                                                                                                                              | PR     | V       | KQ     | LI               | b <sub>2</sub> | b <sub>2</sub>                                                                                                                                                                        | TI-28                           | PN                         | TI                          | b <sub>3</sub>     | PN      | NIHP-28                | y <sub>7</sub> <sup>+2</sup> | y <sub>11</sub> <sup>+3</sup>                               | NIHP               | y <sub>12</sub> <sup>+3</sup> | b <sub>8</sub> -H <sub>2</sub> O | y <sub>11</sub> <sup>+2</sup> | b <sub>9</sub> -H <sub>2</sub> O | y <sub>12</sub> <sup>+2</sup> | y <sub>15</sub> <sup>+2</sup> | y <sub>16</sub> <sup>+2</sup> | y <sub>7</sub>        | b <sub>19</sub> +H <sub>2</sub> O |                       |         |         |                       |                       |         |         |                       |         |                       |         |                       |                       |                       |         |                       |                        |      |      |      |      |       |      |      |      |      |      |      |      |      |      |      |      |      |      |       |      |      |      |      |      |      |                      |      |      |      |      |       |      |       |      |      |      |      |      |      |       |      |      |      |      |        |      |       |      |      |       |      |       |      |      |      |      |      |      |      |      |      |      |      |      |      |      |       |      |      |      |      |      |      |      |      |      |      |          |    |   |    |    |                |                |       |    |    |                |    |         |                              |                               |      |                               |                                  |                               |                                  |                               |                               |                               |                |                                   |           |      |      |     |     |      |      |    |      |       |       |     |     |      |      |     |     |     |      |      |      |      |      |     |      |     |
| Delta ppm                                                                                                                                                                                                                                                                                                                                                                                                                                                                                                                                                                                                                                                                                                                                                                                                                                                                                                                                                                                                                                                                                                                                                                                                                                                                                                                                                                                                                                                                                                                                                                                                                                                                                                                                                                                                                                                                                                                                                                                                                                                                                                                                                                                                                                                                                                                                                                                                                                                                                                                                                                                                                                                                                                                                                                                                                                                                                             | -0.4   | 11.4    | 7.4    | 7.8              | -7.3           | -1.6                                                                                                                                                                                  | GV                              | -1.6                       | -10.2                       | -15.4              | 1.8     | 7.0                    | -1.4                         | -6.1                                                        | 4.6                | 1.4                           | 3.8                              | -3.8                          | -2.2                             | -3.6                          | -2.0                          | -8.0                          | 7.2                   | -3.1                              | 3.8                   |         |         |                       |                       |         |         |                       |         |                       |         |                       |                       |                       |         |                       |                        |      |      |      |      |       |      |      |      |      |      |      |      |      |      |      |      |      |      |       |      |      |      |      |      |      |                      |      |      |      |      |       |      |       |      |      |      |      |      |      |       |      |      |      |      |        |      |       |      |      |       |      |       |      |      |      |      |      |      |      |      |      |      |      |      |      |      |       |      |      |      |      |      |      |      |      |      |      |          |    |   |    |    |                |                |       |    |    |                |    |         |                              |                               |      |                               |                                  |                               |                                  |                               |                               |                               |                |                                   |           |      |      |     |     |      |      |    |      |       |       |     |     |      |      |     |     |     |      |      |      |      |      |     |      |     |

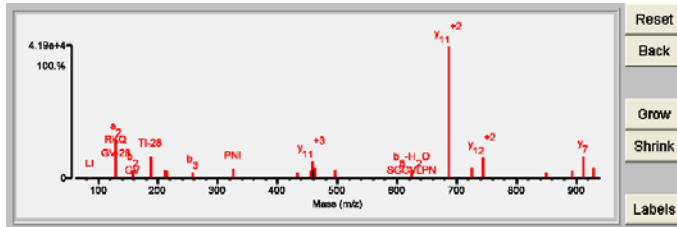

Result Summary

| Rank | Score | SPI (%) | BCS | # Unmatched Ions | Variable sites | Sequence                      | MH <sup>+</sup> Calculated (Da) | MH <sup>+</sup> Error (Da) | MH <sup>+</sup> Error (ppm) | Protein MW/PI (Da) | Species | Accession #            | Protein Name                                                |
|------|-------|---------|-----|------------------|----------------|-------------------------------|---------------------------------|----------------------------|-----------------------------|--------------------|---------|------------------------|-------------------------------------------------------------|
| 1    | 17.55 | 77.5    | 8   | 5/25             | K292k          | (K)FVIHCNSPWGADKCEELLEKTVK(N) | 2859.4168                       | 114.0591                   | 5.4                         | 39617.3/9.80       | HUMAN   | <a href="#">O75367</a> | Core histone macro-H2A.1 OS=Homo sapiens GN=H2AFY PE=1 SV=4 |
| 2    | 13.83 | 67.2    | 6   | 7/25             | K295k          | (K)FVIHCNSPWGADKCEELLEKTVK(N) | 2859.4168                       | 114.0591                   | 5.4                         | 39617.3/9.80       | HUMAN   | <a href="#">O75367</a> | Core histone macro-H2A.1 OS=Homo sapiens GN=H2AFY PE=1 SV=4 |
| 3    | 13.62 | 64.1    | 6   | 7/25             | K285k          | (K)FVIHCNSPWGADKCEELLEKTVK(N) | 2859.4168                       | 114.0591                   | 5.4                         | 39617.3/9.80       | HUMAN   | <a href="#">O75367</a> | Core histone macro-H2A.1 OS=Homo sapiens GN=H2AFY PE=1 SV=4 |

Detailed Results

| Rank | Score | SPI (%) | BCS | # Unmatched Ions | Variable sites | Sequence                                                    | MH <sup>+</sup> Calculated (Da) | MH <sup>+</sup> Error (Da) | MH <sup>+</sup> Error (ppm) | Protein MW/PI (Da) | Species | Accession #            | MS-Digest Index #      | Protein Name                                                |         |         |         |         |         |         |         |         |         |                       |         |         |         |         |         |                   |                       |                       |      |      |
|------|-------|---------|-----|------------------|----------------|-------------------------------------------------------------|---------------------------------|----------------------------|-----------------------------|--------------------|---------|------------------------|------------------------|-------------------------------------------------------------|---------|---------|---------|---------|---------|---------|---------|---------|---------|-----------------------|---------|---------|---------|---------|---------|-------------------|-----------------------|-----------------------|------|------|
| 1    | 17.55 | 77.5    | 8   | 5/25             | K292k          | (K)FV I H C N S P V W / G A D K C E E L / L E K T V / K (N) | 2859.4168                       | 114.0591                   | 5.4                         | 39617.3/9.80       | HUMAN   | <a href="#">O75367</a> | <a href="#">271841</a> | Core histone macro-H2A.1 OS=Homo sapiens GN=H2AFY PE=1 SV=4 |         |         |         |         |         |         |         |         |         |                       |         |         |         |         |         |                   |                       |                       |      |      |
|      |       |         |     |                  |                |                                                             | Fragment-ion (m/z)              | 60.044                     | 70.065                      | 72.080             | 84.081  | 86.096                 | 102.055                | 110.069                                                     | 120.079 | 129.100 | 130.073 | 147.110 | 159.089 | 169.132 | 219.148 | 246.183 | 354.184 | 407.196 <sup>+2</sup> | 497.281 | 612.253 | 661.270 | 718.406 | 831.489 | 858.397           | 867.438 <sup>+2</sup> | 960.489 <sup>+2</sup> |      |      |
|      |       |         |     |                  |                |                                                             | Frac. Inten.(% of TIC)          | 4.27                       | 0.02                        | 0.39               | 0.42    | 1.47                   | 0.26                   | 0.30                                                        | 0.88    | 0.32    | 5.36    | 6.42    | 0.72    | 4.97    | 14.35   | 3.93    | 3.90    | 3.99                  | 4.16    | 4.23    | 5.53    | 7.75    | 5.66    | 4.53              | 8.51                  | 7.66                  |      |      |
|      |       |         |     |                  |                |                                                             | Rel. Inten.(% of BP)            | 29.78                      | 0.14                        | 2.69               | 2.92    | 10.26                  | 1.80                   | 2.07                                                        | 6.16    | 2.24    | 37.36   | 44.75   | 5.03    | 34.65   | 100.00  | 27.40   | 27.17   | 27.78                 | 29.00   | 29.44   | 38.54   | 54.00   | 39.43   | 31.56             | 59.31                 | 53.36                 |      |      |
|      |       |         |     |                  |                |                                                             | Score                           | -0.30                      | 0.20                        | 0.50               | 0.50    | 0.22                   | 1.00                   | 1.00                                                        | 1.00    | 0.20    | 1.50    | 2.00    | -0.35   | 0.50    | 1.50    | -0.27   | -0.28   | 0.50                  | 0.75    | 0.75    | 0.75    | 1.50    | 1.50    | 0.50              | 1.50                  | 1.50                  | 1.50 | 1.50 |
|      |       |         |     |                  |                |                                                             | Ion-type                        | PR                         | V                           | KQ                 | LI      | E                      | H                      | a1                                                          | RKQ     | y1      | W       | a2      | y2      |         |         |         |         | b4                    | IHCNS   | GADKCE  | y5      | y6      | b7      | y14 <sup>+2</sup> | y15 <sup>+2</sup>     |                       |      |      |
|      |       |         |     |                  |                |                                                             | Delta ppm                       | -7.5                       | -5.2                        | -3.3               | -2.6    | 1.4                    | -22.5                  | -23.1                                                       | 1.00    | -18.1   | -17.0   | -20.0   | -11.3   | 7.6     |         |         |         |                       | -14.2   | -6.0    | GADKCE  | 12.7    | -4.8    | -5.0              | 3.9                   | 2.9                   | 9.2  |      |

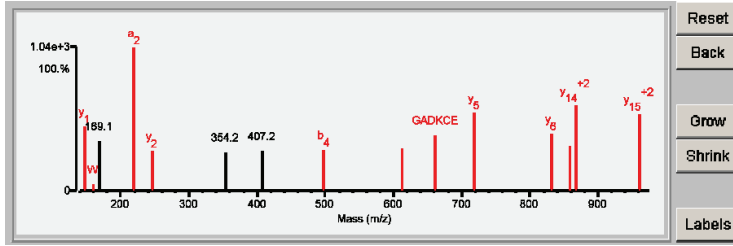

Reset  
Back  
Grow  
Shrink  
Labels

Result Summary

| Rank | Score | SPI (%) | BCS | # Unmatched Ions | Variable sites | Sequence              | MH <sup>+</sup> Calculated (Da) | MH <sup>+</sup> Error (Da) | MH <sup>+</sup> Error (ppm) | Protein MW/pI (Da) | Species | Accession # | Protein Name                                                             |
|------|-------|---------|-----|------------------|----------------|-----------------------|---------------------------------|----------------------------|-----------------------------|--------------------|---------|-------------|--------------------------------------------------------------------------|
| 1    | 18.63 | 83.6    | 10  | 8/25             | K16k           | (R)VDFDETWNKLLTTIK(A) | 1922.0270                       | 114.0529                   | 4.9                         | 86983.6/6.46       | HUMAN   | Q13617      | Cullin-2 OS=Homo sapiens GN=CUL2 PE=1 SV=2                               |
| 2    | 12.98 | 75.3    | 6   | 11/25            | K22k           | (R)VDFDETWNKLLTTIK(A) | 1922.0270                       | 114.0529                   | 4.9                         | 86983.6/6.46       | HUMAN   | Q13617      | Cullin-2 OS=Homo sapiens GN=CUL2 PE=1 SV=2                               |
| 3    | 7.40  | 63.6    | 3   | 15/25            | K849k          | (R)VKDMLKWCCKEVMKK(D) | 1922.0424                       | 114.0374                   | -2.7                        | 99647.4/6.10       | HUMAN   | RP22681     | REVERSE E3 ubiquitin-protein ligase CBL OS=Homo sapiens GN=CBL PE=1 SV=1 |
| 3    | 7.40  | 63.6    | 3   | 15/25            | K853k          | (R)VKDMLKWCCKEVMKK(D) | 1922.0424                       | 114.0374                   | -2.7                        | 99647.4/6.10       | HUMAN   | RP22681     | REVERSE E3 ubiquitin-protein ligase CBL OS=Homo sapiens GN=CBL PE=1 SV=1 |
| 3    | 7.40  | 63.6    | 3   | 15/25            | K842k          | (R)VKDMLKWCCKEVMKK(D) | 1922.0424                       | 114.0374                   | -2.7                        | 99647.4/6.10       | HUMAN   | RP22681     | REVERSE E3 ubiquitin-protein ligase CBL OS=Homo sapiens GN=CBL PE=1 SV=1 |

Detailed Results

| Rank                                                                                                                                                                                                                                                                                                                                                                                                                                                                                                                                                                                                                                                                                                                                                                                                                                                                                                                                                                                                                                                                                                                                                                                                                                                                                                                                                                                                                                                                                                                                                                                                                                                                                                                                                                                                                                                                                                                                                                                                                                                                                                                                                                                                                                                                                                                                                                                                                                                                                                                                                                                                                                                                                                                                                                                                                                                                                                                                                                                                                                                                                                                                                                                                                                                                                 | Score          | SPI (%) | BCS    | # Unmatched Ions | Variable sites | Sequence                                | MH <sup>+</sup> Calculated (Da) | MH <sup>+</sup> Error (Da) | MH <sup>+</sup> Error (ppm) | Protein MW/pI (Da) | Species        | Accession # | MS-Digest Index # | Protein Name                               |                    |                |         |                |                               |                  |         |                               |                               |                |                |         |         |         |         |         |         |         |         |                       |         |         |                       |                       |          |          |                        |      |      |      |      |      |      |       |      |      |      |      |      |      |      |      |      |      |      |      |      |      |       |      |      |      |                      |      |      |      |      |      |      |       |       |       |      |      |      |      |      |       |       |      |       |       |       |      |        |       |      |       |       |      |       |      |      |      |      |      |      |       |      |       |       |       |       |      |      |       |      |      |      |       |      |      |      |      |          |                |  |    |     |                |   |                |                |  |  |                |  |  |  |                |                |  |                |                               |                  |  |                               |                               |                |                |           |       |  |      |      |     |       |       |       |  |  |      |  |  |  |       |     |  |      |      |      |  |     |     |       |     |  |      |  |  |  |  |  |  |  |  |  |  |  |  |  |  |  |  |  |  |  |  |  |  |  |  |  |       |  |  |  |  |  |  |  |  |  |  |  |  |  |  |  |  |  |  |  |  |  |  |  |  |
|--------------------------------------------------------------------------------------------------------------------------------------------------------------------------------------------------------------------------------------------------------------------------------------------------------------------------------------------------------------------------------------------------------------------------------------------------------------------------------------------------------------------------------------------------------------------------------------------------------------------------------------------------------------------------------------------------------------------------------------------------------------------------------------------------------------------------------------------------------------------------------------------------------------------------------------------------------------------------------------------------------------------------------------------------------------------------------------------------------------------------------------------------------------------------------------------------------------------------------------------------------------------------------------------------------------------------------------------------------------------------------------------------------------------------------------------------------------------------------------------------------------------------------------------------------------------------------------------------------------------------------------------------------------------------------------------------------------------------------------------------------------------------------------------------------------------------------------------------------------------------------------------------------------------------------------------------------------------------------------------------------------------------------------------------------------------------------------------------------------------------------------------------------------------------------------------------------------------------------------------------------------------------------------------------------------------------------------------------------------------------------------------------------------------------------------------------------------------------------------------------------------------------------------------------------------------------------------------------------------------------------------------------------------------------------------------------------------------------------------------------------------------------------------------------------------------------------------------------------------------------------------------------------------------------------------------------------------------------------------------------------------------------------------------------------------------------------------------------------------------------------------------------------------------------------------------------------------------------------------------------------------------------------------|----------------|---------|--------|------------------|----------------|-----------------------------------------|---------------------------------|----------------------------|-----------------------------|--------------------|----------------|-------------|-------------------|--------------------------------------------|--------------------|----------------|---------|----------------|-------------------------------|------------------|---------|-------------------------------|-------------------------------|----------------|----------------|---------|---------|---------|---------|---------|---------|---------|---------|-----------------------|---------|---------|-----------------------|-----------------------|----------|----------|------------------------|------|------|------|------|------|------|-------|------|------|------|------|------|------|------|------|------|------|------|------|------|------|-------|------|------|------|----------------------|------|------|------|------|------|------|-------|-------|-------|------|------|------|------|------|-------|-------|------|-------|-------|-------|------|--------|-------|------|-------|-------|------|-------|------|------|------|------|------|------|-------|------|-------|-------|-------|-------|------|------|-------|------|------|------|-------|------|------|------|------|----------|----------------|--|----|-----|----------------|---|----------------|----------------|--|--|----------------|--|--|--|----------------|----------------|--|----------------|-------------------------------|------------------|--|-------------------------------|-------------------------------|----------------|----------------|-----------|-------|--|------|------|-----|-------|-------|-------|--|--|------|--|--|--|-------|-----|--|------|------|------|--|-----|-----|-------|-----|--|------|--|--|--|--|--|--|--|--|--|--|--|--|--|--|--|--|--|--|--|--|--|--|--|--|--|-------|--|--|--|--|--|--|--|--|--|--|--|--|--|--|--|--|--|--|--|--|--|--|--|--|
| 1                                                                                                                                                                                                                                                                                                                                                                                                                                                                                                                                                                                                                                                                                                                                                                                                                                                                                                                                                                                                                                                                                                                                                                                                                                                                                                                                                                                                                                                                                                                                                                                                                                                                                                                                                                                                                                                                                                                                                                                                                                                                                                                                                                                                                                                                                                                                                                                                                                                                                                                                                                                                                                                                                                                                                                                                                                                                                                                                                                                                                                                                                                                                                                                                                                                                                    | 18.63          | 83.6    | 10     | 8/25             | K16k           | (R)V/V/D/E/F/D/E/T/W/N/K/L/L/T/T/I/K(A) | 1922.0270                       | 114.0529                   | 4.9                         | 86983.6/6.46       | HUMAN          | Q13617      | 132065            | Cullin-2 OS=Homo sapiens GN=CUL2 PE=1 SV=2 |                    |                |         |                |                               |                  |         |                               |                               |                |                |         |         |         |         |         |         |         |         |                       |         |         |                       |                       |          |          |                        |      |      |      |      |      |      |       |      |      |      |      |      |      |      |      |      |      |      |      |      |      |       |      |      |      |                      |      |      |      |      |      |      |       |       |       |      |      |      |      |      |       |       |      |       |       |       |      |        |       |      |       |       |      |       |      |      |      |      |      |      |       |      |       |       |       |       |      |      |       |      |      |      |       |      |      |      |      |          |                |  |    |     |                |   |                |                |  |  |                |  |  |  |                |                |  |                |                               |                  |  |                               |                               |                |                |           |       |  |      |      |     |       |       |       |  |  |      |  |  |  |       |     |  |      |      |      |  |     |     |       |     |  |      |  |  |  |  |  |  |  |  |  |  |  |  |  |  |  |  |  |  |  |  |  |  |  |  |  |       |  |  |  |  |  |  |  |  |  |  |  |  |  |  |  |  |  |  |  |  |  |  |  |  |
| <table border="1"> <thead> <tr> <th>Fragment-ion (m/z)</th> <th>72.079</th> <th>73.082</th> <th>86.098</th> <th>129.101</th> <th>147.114</th> <th>159.087</th> <th>171.146</th> <th>199.138</th> <th>235.103</th> <th>242.185</th> <th>314.170</th> <th>340.166</th> <th>364.158</th> <th>392.185</th> <th>462.287</th> <th>575.382</th> <th>655.846</th> <th>688.459</th> <th>788.441<sup>+2</sup></th> <th>861.974</th> <th>862.459</th> <th>919.470<sup>+2</sup></th> <th>969.008<sup>+2</sup></th> <th>1044.621</th> <th>1230.723</th> </tr> </thead> <tbody> <tr> <td>Frac. Inten.(% of TIC)</td> <td>0.77</td> <td>1.98</td> <td>0.06</td> <td>0.07</td> <td>1.96</td> <td>0.07</td> <td>17.27</td> <td>2.73</td> <td>5.23</td> <td>2.02</td> <td>1.94</td> <td>2.24</td> <td>2.33</td> <td>2.24</td> <td>3.96</td> <td>3.18</td> <td>2.29</td> <td>3.27</td> <td>4.73</td> <td>4.16</td> <td>2.15</td> <td>23.87</td> <td>5.65</td> <td>2.25</td> <td>3.58</td> </tr> <tr> <td>Rel. Inten.(% of BP)</td> <td>3.24</td> <td>8.31</td> <td>0.24</td> <td>0.30</td> <td>8.19</td> <td>0.30</td> <td>72.34</td> <td>11.42</td> <td>21.90</td> <td>8.46</td> <td>8.12</td> <td>9.38</td> <td>9.74</td> <td>9.38</td> <td>16.59</td> <td>13.34</td> <td>9.61</td> <td>13.68</td> <td>19.82</td> <td>17.43</td> <td>8.99</td> <td>100.00</td> <td>23.69</td> <td>9.44</td> <td>15.01</td> </tr> <tr> <td>Score</td> <td>0.50</td> <td>-0.08</td> <td>0.22</td> <td>0.20</td> <td>1.50</td> <td>2.00</td> <td>0.50</td> <td>0.50</td> <td>-0.20</td> <td>0.50</td> <td>-0.09</td> <td>-0.09</td> <td>-0.09</td> <td>-0.09</td> <td>1.50</td> <td>1.50</td> <td>-0.09</td> <td>1.50</td> <td>1.50</td> <td>1.50</td> <td>-0.08</td> <td>1.50</td> <td>1.50</td> <td>1.50</td> <td>1.50</td> </tr> <tr> <td>Ion-type</td> <td>a<sub>1</sub></td> <td></td> <td>LI</td> <td>RKQ</td> <td>y<sub>1</sub></td> <td>W</td> <td>a<sub>2</sub></td> <td>b<sub>2</sub></td> <td></td> <td></td> <td>b<sub>3</sub></td> <td></td> <td></td> <td></td> <td>y<sub>4</sub></td> <td>y<sub>5</sub></td> <td></td> <td>y<sub>6</sub></td> <td>y<sub>12</sub><sup>+2</sup></td> <td>y<sup>+13</sup></td> <td></td> <td>y<sub>14</sub><sup>+2</sup></td> <td>y<sub>15</sub><sup>+2</sup></td> <td>y<sub>8</sub></td> <td>y<sub>9</sub></td> </tr> <tr> <td>Delta ppm</td> <td>-35.7</td> <td></td> <td>16.0</td> <td>-6.5</td> <td>5.4</td> <td>-29.4</td> <td>-22.7</td> <td>-33.7</td> <td></td> <td></td> <td>-6.8</td> <td></td> <td></td> <td></td> <td>-10.7</td> <td>9.6</td> <td></td> <td>-2.3</td> <td>22.9</td> <td>20.0</td> <td></td> <td>0.0</td> <td>4.2</td> <td>-19.3</td> <td>1.9</td> </tr> <tr> <td></td> <td>0.50</td> <td></td> </tr> <tr> <td></td> <td>-20.5</td> <td></td> </tr> </tbody> </table> |                |         |        |                  |                |                                         |                                 |                            |                             |                    |                |             |                   |                                            | Fragment-ion (m/z) | 72.079         | 73.082  | 86.098         | 129.101                       | 147.114          | 159.087 | 171.146                       | 199.138                       | 235.103        | 242.185        | 314.170 | 340.166 | 364.158 | 392.185 | 462.287 | 575.382 | 655.846 | 688.459 | 788.441 <sup>+2</sup> | 861.974 | 862.459 | 919.470 <sup>+2</sup> | 969.008 <sup>+2</sup> | 1044.621 | 1230.723 | Frac. Inten.(% of TIC) | 0.77 | 1.98 | 0.06 | 0.07 | 1.96 | 0.07 | 17.27 | 2.73 | 5.23 | 2.02 | 1.94 | 2.24 | 2.33 | 2.24 | 3.96 | 3.18 | 2.29 | 3.27 | 4.73 | 4.16 | 2.15 | 23.87 | 5.65 | 2.25 | 3.58 | Rel. Inten.(% of BP) | 3.24 | 8.31 | 0.24 | 0.30 | 8.19 | 0.30 | 72.34 | 11.42 | 21.90 | 8.46 | 8.12 | 9.38 | 9.74 | 9.38 | 16.59 | 13.34 | 9.61 | 13.68 | 19.82 | 17.43 | 8.99 | 100.00 | 23.69 | 9.44 | 15.01 | Score | 0.50 | -0.08 | 0.22 | 0.20 | 1.50 | 2.00 | 0.50 | 0.50 | -0.20 | 0.50 | -0.09 | -0.09 | -0.09 | -0.09 | 1.50 | 1.50 | -0.09 | 1.50 | 1.50 | 1.50 | -0.08 | 1.50 | 1.50 | 1.50 | 1.50 | Ion-type | a <sub>1</sub> |  | LI | RKQ | y <sub>1</sub> | W | a <sub>2</sub> | b <sub>2</sub> |  |  | b <sub>3</sub> |  |  |  | y <sub>4</sub> | y <sub>5</sub> |  | y <sub>6</sub> | y <sub>12</sub> <sup>+2</sup> | y <sup>+13</sup> |  | y <sub>14</sub> <sup>+2</sup> | y <sub>15</sub> <sup>+2</sup> | y <sub>8</sub> | y <sub>9</sub> | Delta ppm | -35.7 |  | 16.0 | -6.5 | 5.4 | -29.4 | -22.7 | -33.7 |  |  | -6.8 |  |  |  | -10.7 | 9.6 |  | -2.3 | 22.9 | 20.0 |  | 0.0 | 4.2 | -19.3 | 1.9 |  | 0.50 |  |  |  |  |  |  |  |  |  |  |  |  |  |  |  |  |  |  |  |  |  |  |  |  |  | -20.5 |  |  |  |  |  |  |  |  |  |  |  |  |  |  |  |  |  |  |  |  |  |  |  |  |
| Fragment-ion (m/z)                                                                                                                                                                                                                                                                                                                                                                                                                                                                                                                                                                                                                                                                                                                                                                                                                                                                                                                                                                                                                                                                                                                                                                                                                                                                                                                                                                                                                                                                                                                                                                                                                                                                                                                                                                                                                                                                                                                                                                                                                                                                                                                                                                                                                                                                                                                                                                                                                                                                                                                                                                                                                                                                                                                                                                                                                                                                                                                                                                                                                                                                                                                                                                                                                                                                   | 72.079         | 73.082  | 86.098 | 129.101          | 147.114        | 159.087                                 | 171.146                         | 199.138                    | 235.103                     | 242.185            | 314.170        | 340.166     | 364.158           | 392.185                                    | 462.287            | 575.382        | 655.846 | 688.459        | 788.441 <sup>+2</sup>         | 861.974          | 862.459 | 919.470 <sup>+2</sup>         | 969.008 <sup>+2</sup>         | 1044.621       | 1230.723       |         |         |         |         |         |         |         |         |                       |         |         |                       |                       |          |          |                        |      |      |      |      |      |      |       |      |      |      |      |      |      |      |      |      |      |      |      |      |      |       |      |      |      |                      |      |      |      |      |      |      |       |       |       |      |      |      |      |      |       |       |      |       |       |       |      |        |       |      |       |       |      |       |      |      |      |      |      |      |       |      |       |       |       |       |      |      |       |      |      |      |       |      |      |      |      |          |                |  |    |     |                |   |                |                |  |  |                |  |  |  |                |                |  |                |                               |                  |  |                               |                               |                |                |           |       |  |      |      |     |       |       |       |  |  |      |  |  |  |       |     |  |      |      |      |  |     |     |       |     |  |      |  |  |  |  |  |  |  |  |  |  |  |  |  |  |  |  |  |  |  |  |  |  |  |  |  |       |  |  |  |  |  |  |  |  |  |  |  |  |  |  |  |  |  |  |  |  |  |  |  |  |
| Frac. Inten.(% of TIC)                                                                                                                                                                                                                                                                                                                                                                                                                                                                                                                                                                                                                                                                                                                                                                                                                                                                                                                                                                                                                                                                                                                                                                                                                                                                                                                                                                                                                                                                                                                                                                                                                                                                                                                                                                                                                                                                                                                                                                                                                                                                                                                                                                                                                                                                                                                                                                                                                                                                                                                                                                                                                                                                                                                                                                                                                                                                                                                                                                                                                                                                                                                                                                                                                                                               | 0.77           | 1.98    | 0.06   | 0.07             | 1.96           | 0.07                                    | 17.27                           | 2.73                       | 5.23                        | 2.02               | 1.94           | 2.24        | 2.33              | 2.24                                       | 3.96               | 3.18           | 2.29    | 3.27           | 4.73                          | 4.16             | 2.15    | 23.87                         | 5.65                          | 2.25           | 3.58           |         |         |         |         |         |         |         |         |                       |         |         |                       |                       |          |          |                        |      |      |      |      |      |      |       |      |      |      |      |      |      |      |      |      |      |      |      |      |      |       |      |      |      |                      |      |      |      |      |      |      |       |       |       |      |      |      |      |      |       |       |      |       |       |       |      |        |       |      |       |       |      |       |      |      |      |      |      |      |       |      |       |       |       |       |      |      |       |      |      |      |       |      |      |      |      |          |                |  |    |     |                |   |                |                |  |  |                |  |  |  |                |                |  |                |                               |                  |  |                               |                               |                |                |           |       |  |      |      |     |       |       |       |  |  |      |  |  |  |       |     |  |      |      |      |  |     |     |       |     |  |      |  |  |  |  |  |  |  |  |  |  |  |  |  |  |  |  |  |  |  |  |  |  |  |  |  |       |  |  |  |  |  |  |  |  |  |  |  |  |  |  |  |  |  |  |  |  |  |  |  |  |
| Rel. Inten.(% of BP)                                                                                                                                                                                                                                                                                                                                                                                                                                                                                                                                                                                                                                                                                                                                                                                                                                                                                                                                                                                                                                                                                                                                                                                                                                                                                                                                                                                                                                                                                                                                                                                                                                                                                                                                                                                                                                                                                                                                                                                                                                                                                                                                                                                                                                                                                                                                                                                                                                                                                                                                                                                                                                                                                                                                                                                                                                                                                                                                                                                                                                                                                                                                                                                                                                                                 | 3.24           | 8.31    | 0.24   | 0.30             | 8.19           | 0.30                                    | 72.34                           | 11.42                      | 21.90                       | 8.46               | 8.12           | 9.38        | 9.74              | 9.38                                       | 16.59              | 13.34          | 9.61    | 13.68          | 19.82                         | 17.43            | 8.99    | 100.00                        | 23.69                         | 9.44           | 15.01          |         |         |         |         |         |         |         |         |                       |         |         |                       |                       |          |          |                        |      |      |      |      |      |      |       |      |      |      |      |      |      |      |      |      |      |      |      |      |      |       |      |      |      |                      |      |      |      |      |      |      |       |       |       |      |      |      |      |      |       |       |      |       |       |       |      |        |       |      |       |       |      |       |      |      |      |      |      |      |       |      |       |       |       |       |      |      |       |      |      |      |       |      |      |      |      |          |                |  |    |     |                |   |                |                |  |  |                |  |  |  |                |                |  |                |                               |                  |  |                               |                               |                |                |           |       |  |      |      |     |       |       |       |  |  |      |  |  |  |       |     |  |      |      |      |  |     |     |       |     |  |      |  |  |  |  |  |  |  |  |  |  |  |  |  |  |  |  |  |  |  |  |  |  |  |  |  |       |  |  |  |  |  |  |  |  |  |  |  |  |  |  |  |  |  |  |  |  |  |  |  |  |
| Score                                                                                                                                                                                                                                                                                                                                                                                                                                                                                                                                                                                                                                                                                                                                                                                                                                                                                                                                                                                                                                                                                                                                                                                                                                                                                                                                                                                                                                                                                                                                                                                                                                                                                                                                                                                                                                                                                                                                                                                                                                                                                                                                                                                                                                                                                                                                                                                                                                                                                                                                                                                                                                                                                                                                                                                                                                                                                                                                                                                                                                                                                                                                                                                                                                                                                | 0.50           | -0.08   | 0.22   | 0.20             | 1.50           | 2.00                                    | 0.50                            | 0.50                       | -0.20                       | 0.50               | -0.09          | -0.09       | -0.09             | -0.09                                      | 1.50               | 1.50           | -0.09   | 1.50           | 1.50                          | 1.50             | -0.08   | 1.50                          | 1.50                          | 1.50           | 1.50           |         |         |         |         |         |         |         |         |                       |         |         |                       |                       |          |          |                        |      |      |      |      |      |      |       |      |      |      |      |      |      |      |      |      |      |      |      |      |      |       |      |      |      |                      |      |      |      |      |      |      |       |       |       |      |      |      |      |      |       |       |      |       |       |       |      |        |       |      |       |       |      |       |      |      |      |      |      |      |       |      |       |       |       |       |      |      |       |      |      |      |       |      |      |      |      |          |                |  |    |     |                |   |                |                |  |  |                |  |  |  |                |                |  |                |                               |                  |  |                               |                               |                |                |           |       |  |      |      |     |       |       |       |  |  |      |  |  |  |       |     |  |      |      |      |  |     |     |       |     |  |      |  |  |  |  |  |  |  |  |  |  |  |  |  |  |  |  |  |  |  |  |  |  |  |  |  |       |  |  |  |  |  |  |  |  |  |  |  |  |  |  |  |  |  |  |  |  |  |  |  |  |
| Ion-type                                                                                                                                                                                                                                                                                                                                                                                                                                                                                                                                                                                                                                                                                                                                                                                                                                                                                                                                                                                                                                                                                                                                                                                                                                                                                                                                                                                                                                                                                                                                                                                                                                                                                                                                                                                                                                                                                                                                                                                                                                                                                                                                                                                                                                                                                                                                                                                                                                                                                                                                                                                                                                                                                                                                                                                                                                                                                                                                                                                                                                                                                                                                                                                                                                                                             | a <sub>1</sub> |         | LI     | RKQ              | y <sub>1</sub> | W                                       | a <sub>2</sub>                  | b <sub>2</sub>             |                             |                    | b <sub>3</sub> |             |                   |                                            | y <sub>4</sub>     | y <sub>5</sub> |         | y <sub>6</sub> | y <sub>12</sub> <sup>+2</sup> | y <sup>+13</sup> |         | y <sub>14</sub> <sup>+2</sup> | y <sub>15</sub> <sup>+2</sup> | y <sub>8</sub> | y <sub>9</sub> |         |         |         |         |         |         |         |         |                       |         |         |                       |                       |          |          |                        |      |      |      |      |      |      |       |      |      |      |      |      |      |      |      |      |      |      |      |      |      |       |      |      |      |                      |      |      |      |      |      |      |       |       |       |      |      |      |      |      |       |       |      |       |       |       |      |        |       |      |       |       |      |       |      |      |      |      |      |      |       |      |       |       |       |       |      |      |       |      |      |      |       |      |      |      |      |          |                |  |    |     |                |   |                |                |  |  |                |  |  |  |                |                |  |                |                               |                  |  |                               |                               |                |                |           |       |  |      |      |     |       |       |       |  |  |      |  |  |  |       |     |  |      |      |      |  |     |     |       |     |  |      |  |  |  |  |  |  |  |  |  |  |  |  |  |  |  |  |  |  |  |  |  |  |  |  |  |       |  |  |  |  |  |  |  |  |  |  |  |  |  |  |  |  |  |  |  |  |  |  |  |  |
| Delta ppm                                                                                                                                                                                                                                                                                                                                                                                                                                                                                                                                                                                                                                                                                                                                                                                                                                                                                                                                                                                                                                                                                                                                                                                                                                                                                                                                                                                                                                                                                                                                                                                                                                                                                                                                                                                                                                                                                                                                                                                                                                                                                                                                                                                                                                                                                                                                                                                                                                                                                                                                                                                                                                                                                                                                                                                                                                                                                                                                                                                                                                                                                                                                                                                                                                                                            | -35.7          |         | 16.0   | -6.5             | 5.4            | -29.4                                   | -22.7                           | -33.7                      |                             |                    | -6.8           |             |                   |                                            | -10.7              | 9.6            |         | -2.3           | 22.9                          | 20.0             |         | 0.0                           | 4.2                           | -19.3          | 1.9            |         |         |         |         |         |         |         |         |                       |         |         |                       |                       |          |          |                        |      |      |      |      |      |      |       |      |      |      |      |      |      |      |      |      |      |      |      |      |      |       |      |      |      |                      |      |      |      |      |      |      |       |       |       |      |      |      |      |      |       |       |      |       |       |       |      |        |       |      |       |       |      |       |      |      |      |      |      |      |       |      |       |       |       |       |      |      |       |      |      |      |       |      |      |      |      |          |                |  |    |     |                |   |                |                |  |  |                |  |  |  |                |                |  |                |                               |                  |  |                               |                               |                |                |           |       |  |      |      |     |       |       |       |  |  |      |  |  |  |       |     |  |      |      |      |  |     |     |       |     |  |      |  |  |  |  |  |  |  |  |  |  |  |  |  |  |  |  |  |  |  |  |  |  |  |  |  |       |  |  |  |  |  |  |  |  |  |  |  |  |  |  |  |  |  |  |  |  |  |  |  |  |
|                                                                                                                                                                                                                                                                                                                                                                                                                                                                                                                                                                                                                                                                                                                                                                                                                                                                                                                                                                                                                                                                                                                                                                                                                                                                                                                                                                                                                                                                                                                                                                                                                                                                                                                                                                                                                                                                                                                                                                                                                                                                                                                                                                                                                                                                                                                                                                                                                                                                                                                                                                                                                                                                                                                                                                                                                                                                                                                                                                                                                                                                                                                                                                                                                                                                                      | 0.50           |         |        |                  |                |                                         |                                 |                            |                             |                    |                |             |                   |                                            |                    |                |         |                |                               |                  |         |                               |                               |                |                |         |         |         |         |         |         |         |         |                       |         |         |                       |                       |          |          |                        |      |      |      |      |      |      |       |      |      |      |      |      |      |      |      |      |      |      |      |      |      |       |      |      |      |                      |      |      |      |      |      |      |       |       |       |      |      |      |      |      |       |       |      |       |       |       |      |        |       |      |       |       |      |       |      |      |      |      |      |      |       |      |       |       |       |       |      |      |       |      |      |      |       |      |      |      |      |          |                |  |    |     |                |   |                |                |  |  |                |  |  |  |                |                |  |                |                               |                  |  |                               |                               |                |                |           |       |  |      |      |     |       |       |       |  |  |      |  |  |  |       |     |  |      |      |      |  |     |     |       |     |  |      |  |  |  |  |  |  |  |  |  |  |  |  |  |  |  |  |  |  |  |  |  |  |  |  |  |       |  |  |  |  |  |  |  |  |  |  |  |  |  |  |  |  |  |  |  |  |  |  |  |  |
|                                                                                                                                                                                                                                                                                                                                                                                                                                                                                                                                                                                                                                                                                                                                                                                                                                                                                                                                                                                                                                                                                                                                                                                                                                                                                                                                                                                                                                                                                                                                                                                                                                                                                                                                                                                                                                                                                                                                                                                                                                                                                                                                                                                                                                                                                                                                                                                                                                                                                                                                                                                                                                                                                                                                                                                                                                                                                                                                                                                                                                                                                                                                                                                                                                                                                      | -20.5          |         |        |                  |                |                                         |                                 |                            |                             |                    |                |             |                   |                                            |                    |                |         |                |                               |                  |         |                               |                               |                |                |         |         |         |         |         |         |         |         |                       |         |         |                       |                       |          |          |                        |      |      |      |      |      |      |       |      |      |      |      |      |      |      |      |      |      |      |      |      |      |       |      |      |      |                      |      |      |      |      |      |      |       |       |       |      |      |      |      |      |       |       |      |       |       |       |      |        |       |      |       |       |      |       |      |      |      |      |      |      |       |      |       |       |       |       |      |      |       |      |      |      |       |      |      |      |      |          |                |  |    |     |                |   |                |                |  |  |                |  |  |  |                |                |  |                |                               |                  |  |                               |                               |                |                |           |       |  |      |      |     |       |       |       |  |  |      |  |  |  |       |     |  |      |      |      |  |     |     |       |     |  |      |  |  |  |  |  |  |  |  |  |  |  |  |  |  |  |  |  |  |  |  |  |  |  |  |  |       |  |  |  |  |  |  |  |  |  |  |  |  |  |  |  |  |  |  |  |  |  |  |  |  |

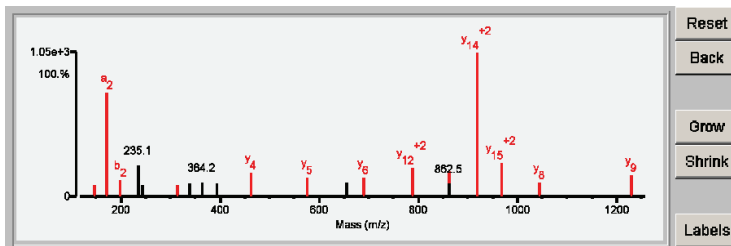

Result Summary

| Rank | Score | SPI (%) | BCS | # Unmatched ions | Variable sites | Sequence                   | MH <sup>+</sup> Calculated (Da) | MH <sup>+</sup> Error (Da) | MH <sup>+</sup> Error (ppm) | Protein MW/pi (Da) | Species | Accession # | Protein Name                                                        |
|------|-------|---------|-----|------------------|----------------|----------------------------|---------------------------------|----------------------------|-----------------------------|--------------------|---------|-------------|---------------------------------------------------------------------|
| 1    | 13.59 | 77.7    | 6   | 7/25             | K63k           | (R)IYDAQNELSAATHLTskLLK(E) | 2216.1921                       | 114.0720                   | 12.5                        | 79663.9/5.28       | HUMAN   | Q9UKG1      | DCC-interacting protein 13-alpha OS=Homo sapiens GN=APPL1 PE=1 SV=1 |
| 2    | 11.39 | 71.2    | 5   | 9/25             | K66k           | (R)IYDAQNELSAATHLTskLLK(E) | 2216.1921                       | 114.0720                   | 12.5                        | 79663.9/5.28       | HUMAN   | Q9UKG1      | DCC-interacting protein 13-alpha OS=Homo sapiens GN=APPL1 PE=1 SV=1 |

Detailed Results

| Rank                    | Score | SPI (%) | BCS | # Unmatched ions | Variable sites | Sequence                    | MH <sup>+</sup> Calculated (Da) | MH <sup>+</sup> Error (Da) | MH <sup>+</sup> Error (ppm) | Protein MW/pi (Da) | Species | Accession # | MS-Digest Index # | Protein Name                                                        |         |         |         |         |         |         |         |         |         |         |         |                       |                       |                       |                       |         |         |  |  |  |  |  |
|-------------------------|-------|---------|-----|------------------|----------------|-----------------------------|---------------------------------|----------------------------|-----------------------------|--------------------|---------|-------------|-------------------|---------------------------------------------------------------------|---------|---------|---------|---------|---------|---------|---------|---------|---------|---------|---------|-----------------------|-----------------------|-----------------------|-----------------------|---------|---------|--|--|--|--|--|
| 1                       | 13.59 | 77.7    | 6   | 7/25             | K63k           | (R)IYDAQNELS/AATHLTskLLK(E) | 2216.1921                       | 114.0720                   | 12.5                        | 79663.9/5.28       | HUMAN   | Q9UKG1      | 169043            | DCC-interacting protein 13-alpha OS=Homo sapiens GN=APPL1 PE=1 SV=1 |         |         |         |         |         |         |         |         |         |         |         |                       |                       |                       |                       |         |         |  |  |  |  |  |
| Fragment-ion (m/z)      |       |         |     |                  |                |                             | 70.065                          | 84.044                     | 84.081                      | 86.097             | 87.055  | 87.101      | 101.072           | 102.055                                                             | 110.071 | 120.082 | 129.102 | 130.084 | 136.074 | 147.112 | 159.078 | 249.159 | 339.161 | 392.178 | 436.249 | 462.972 <sup>+4</sup> | 648.889 <sup>+2</sup> | 692.413 <sup>+2</sup> | 748.957 <sup>+2</sup> | 833.472 | 916.582 |  |  |  |  |  |
| Frac. Inten. (% of TIC) |       |         |     |                  |                |                             | 0.15                            | 0.22                       | 0.29                        | 32.14              | 0.13    | 3.53        | 0.09              | 0.31                                                                | 0.15    | 4.94    | 0.15    | 2.92    | 0.21    | 3.54    | 4.78    | 3.53    | 4.54    | 3.35    | 3.02    | 3.06                  | 3.04                  | 13.37                 | 6.50                  | 3.07    | 2.98    |  |  |  |  |  |
| Rel. Inten. (% of BP)   |       |         |     |                  |                |                             | 0.47                            | 0.67                       | 0.89                        | 100.00             | 0.41    | 10.99       | 0.27              | 0.96                                                                | 0.45    | 15.36   | 0.46    | 9.10    | 0.64    | 11.02   | 14.87   | 10.99   | 14.12   | 10.42   | 9.40    | 9.52                  | 9.46                  | 41.61                 | 20.23                 | 9.56    | 9.26    |  |  |  |  |  |
| Score                   |       |         |     |                  |                |                             | -0.00                           |                            | 0.50                        | 0.33               | -0.11   |             |                   | 1.00                                                                | 1.00    | -0.15   | 0.20    | 0.50    | 1.00    | 1.50    | 0.75    | 0.50    | -0.14   | 0.50    | -0.09   | -0.10                 | 1.50                  | 1.50                  | -0.10                 | 1.50    |         |  |  |  |  |  |
| Ion-type                |       |         |     |                  |                |                             |                                 | E                          | KQ                          |                    |         |             |                   | KQ                                                                  | E       | H       |         | RKQ     | y1-NH3  | Y       | y1      | SA      | a2      |         |         |                       |                       |                       |                       |         |         |  |  |  |  |  |
| Delta ppm               |       |         |     |                  |                |                             |                                 |                            | 5.0                         |                    |         |             |                   |                                                                     |         |         |         |         |         |         |         |         |         |         |         |                       |                       |                       |                       |         |         |  |  |  |  |  |
|                         |       |         |     |                  |                |                             |                                 |                            | -10.7                       |                    |         |             |                   | -1.5                                                                | -5.2    |         |         |         |         |         |         |         |         |         |         |                       |                       |                       |                       |         |         |  |  |  |  |  |
|                         |       |         |     |                  |                |                             |                                 |                            | 0.50                        |                    |         |             |                   |                                                                     |         |         |         |         |         |         |         |         |         |         |         |                       |                       |                       |                       |         |         |  |  |  |  |  |
|                         |       |         |     |                  |                |                             |                                 |                            | LI                          |                    |         |             |                   |                                                                     |         |         |         |         |         |         |         |         |         |         |         |                       |                       |                       |                       |         |         |  |  |  |  |  |
|                         |       |         |     |                  |                |                             |                                 |                            | 2.0                         |                    |         |             |                   |                                                                     |         |         |         |         |         |         |         |         |         |         |         |                       |                       |                       |                       |         |         |  |  |  |  |  |

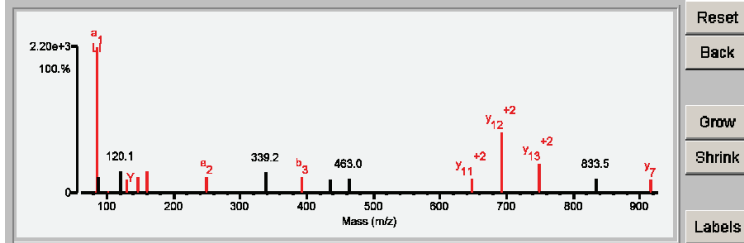

Reset

Back

Grow

Shrink

Labels

Result Summary

| Rank | Score | SPI (%) | BCS | # Unmatched Ions | Variable sites | Sequence            | MH <sup>+</sup> Calculated (Da) | MH <sup>+</sup> Error (Da) | MH <sup>+</sup> Error (ppm) | Protein MW/pi (Da) | Species | Accession # | Protein Name                              |
|------|-------|---------|-----|------------------|----------------|---------------------|---------------------------------|----------------------------|-----------------------------|--------------------|---------|-------------|-------------------------------------------|
| 1    | 12.91 | 66.2    | 9   | 8/25             | K109k          | (R)TNEKVELQELNDR(F) | 1587.7973                       | 114.0409                   | -1.2                        | 53536.0/5.21       | HUMAN   | P17661      | Desmin OS=Homo sapiens GN=DES PE=1 SV=3   |
| 1    | 12.91 | 66.2    | 9   | 8/25             | K104k          | (R)TNEKVELQELNDR(F) | 1587.7973                       | 114.0409                   | -1.2                        | 53651.9/5.06       | HUMAN   | P08670      | Vimentin OS=Homo sapiens GN=VIM PE=1 SV=4 |

Detailed Results

| Rank | Score | SPI (%) | BCS | # Unmatched Ions | Variable sites | Sequence            | MH <sup>+</sup> Calculated (Da) | MH <sup>+</sup> Error (Da) | MH <sup>+</sup> Error (ppm) | Protein MW/pi (Da) | Species | Accession # | MS-Digest Index # | Protein Name                              |
|------|-------|---------|-----|------------------|----------------|---------------------|---------------------------------|----------------------------|-----------------------------|--------------------|---------|-------------|-------------------|-------------------------------------------|
| 1    | 12.91 | 66.2    | 9   | 8/25             | K109k          | (R)TNEKVELQELNDR(F) | 1587.7973                       | 114.0409                   | -1.2                        | 53536.0/5.21       | HUMAN   | P17661      | 157549            | Desmin OS=Homo sapiens GN=DES PE=1 SV=3   |
| 1    | 12.91 | 66.2    | 9   | 8/25             | K104k          | (R)TNEKVELQELNDR(F) | 1587.7973                       | 114.0409                   | -1.2                        | 53651.9/5.06       | HUMAN   | P08670      | 837031            | Vimentin OS=Homo sapiens GN=VIM PE=1 SV=4 |

  

| Fragment-ion (m/z)      | 70.062 | 72.079 | 84.047                           | 84.080 | 86.093 | 101.070 | 102.052        | 155.039        | 175.115        | 216.105        | 248.127        | 294.152        | 307.115        | 354.168        | 371.183 | 404.191        | 441.750 <sup>+2</sup> | 517.283        | 519.790 <sup>+2</sup> | 585.298        | 646.316        | 677.361 <sup>+2</sup>            | 756.355        | 774.382        | 887.439 |
|-------------------------|--------|--------|----------------------------------|--------|--------|---------|----------------|----------------|----------------|----------------|----------------|----------------|----------------|----------------|---------|----------------|-----------------------|----------------|-----------------------|----------------|----------------|----------------------------------|----------------|----------------|---------|
| Frac. Inten. (% of TIC) | 0.01   | 0.23   | 0.14                             | 0.11   | 6.19   | 0.19    | 0.23           | 3.82           | 3.49           | 8.83           | 3.07           | 3.07           | 6.26           | 2.78           | 3.48    | 4.20           | 4.38                  | 4.96           | 4.53                  | 4.72           | 16.61          | 2.81                             | 5.85           | 6.39           | 3.68    |
| Rel. Inten. (% of BP)   | 0.03   | 1.38   | 0.86                             | 0.65   | 37.27  | 1.12    | 1.36           | 23.00          | 21.03          | 53.15          | 18.48          | 18.48          | 37.65          | 16.73          | 20.95   | 25.27          | 26.34                 | 29.85          | 27.25                 | 28.40          | 100.00         | 16.89                            | 35.21          | 38.44          | 22.15   |
| Score                   | 0.20   | 0.50   | 1.00                             |        | -0.37  |         | 0.50           | 1.00           | -0.23          | 1.50           | 0.50           | -0.18          | 1.50           | -0.38          | -0.17   | 1.50           | -0.26                 | 1.50           | 0.75                  | 0.75           | 1.50           | 1.50                             | 0.50           | 1.50           | 1.50    |
| Ion-type                | PR     | V      | b <sub>1</sub> -H <sub>2</sub> O | QK     |        | QK      | b <sub>1</sub> | y <sub>1</sub> | b <sub>2</sub> | b <sub>2</sub> | b <sub>2</sub> | b <sub>2</sub> | b <sub>2</sub> | b <sub>2</sub> | QEL     | y <sub>3</sub> | y <sub>4</sub>        | y <sub>4</sub> | NEKV                  | y <sub>5</sub> | y <sub>5</sub> | y <sub>6</sub> -H <sub>2</sub> O | y <sub>6</sub> | y <sub>7</sub> |         |
| Delta ppm               | -38.9  | -23.2  | 14.4                             |        |        | -12.3   | -40.7          | 1.00           | -22.0          | 27.4           |                | 30.0           |                |                | -29.1   | 4.4            |                       | 19.7           |                       | -3.2           | 0.2            | -11.5                            | 10.4           | -22.0          |         |

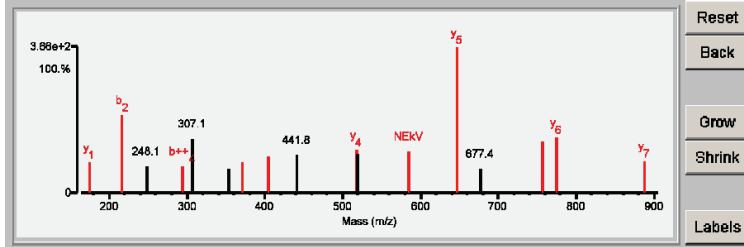

Reset

Back

Grow

Shrink

Labels

Result Summary

| Rank | Score | SPI (%) | BCS | # Unmatched ions | Variable sites | Sequence            | MH <sup>+</sup> Calculated (Da) | MH <sup>+</sup> Error (Da) | MH <sup>+</sup> Error (ppm) | Protein MW/pI (Da) | Species | Accession # | Protein Name                                                                      |
|------|-------|---------|-----|------------------|----------------|---------------------|---------------------------------|----------------------------|-----------------------------|--------------------|---------|-------------|-----------------------------------------------------------------------------------|
| 1    | 14.55 | 72.4    | 11  | 6/25             | K159k          | (K)KIIENELEGFQIR(L) | 1517.8322                       | 114.0561                   | 8.1                         | 40542.4/9.00       | HUMAN   | Q9Y295      | Developmentally-regulated GTP-binding protein 1 OS=Homo sapiens GN=DRG1 PE=1 SV=1 |

Detailed Results

| Rank | Score | SPI (%) | BCS | # Unmatched ions | Variable sites | Sequence            | MH <sup>+</sup> Calculated (Da) | MH <sup>+</sup> Error (Da) | MH <sup>+</sup> Error (ppm) | Protein MW/pI (Da) | Species | Accession # | MS-Digest Index # | Protein Name                                                                      |
|------|-------|---------|-----|------------------|----------------|---------------------|---------------------------------|----------------------------|-----------------------------|--------------------|---------|-------------|-------------------|-----------------------------------------------------------------------------------|
| 1    | 14.55 | 72.4    | 11  | 6/25             | K159k          | (K)KIIENELEGFQIR(L) | 1517.8322                       | 114.0561                   | 8.1                         | 40542.4/9.00       | HUMAN   | Q9Y295      | 85945             | Developmentally-regulated GTP-binding protein 1 OS=Homo sapiens GN=DRG1 PE=1 SV=1 |

| Fragment-ion (m/z)      | 70.065 | 84.044 | 84.081 | 86.096 | 89.060 | 102.054 | 116.066 | 120.080 | 175.122 | 243.136 | 328.221 | 345.223 | 356.229 | 469.200 <sup>+2</sup> | 469.303 | 492.295 | 549.316 | 579.203 | 598.354 | 616.331 | 660.337 | 678.353 | 712.393 | 791.432 | 841.442 |
|-------------------------|--------|--------|--------|--------|--------|---------|---------|---------|---------|---------|---------|---------|---------|-----------------------|---------|---------|---------|---------|---------|---------|---------|---------|---------|---------|---------|
| Frac. Inten. (% of TIC) | 0.00   | 0.08   | 13.64  | 0.98   | 3.74   | 0.25    | 3.22    | 0.17    | 3.03    | 1.90    | 2.63    | 4.93    | 3.78    | 2.94                  | 2.52    | 3.76    | 17.03   | 2.05    | 2.37    | 2.06    | 3.59    | 11.86   | 2.67    | 3.21    | 7.56    |
| Rel. Inten. (% of BP)   | 0.02   | 0.48   | 80.11  | 5.74   | 21.93  | 1.49    | 18.89   | 1.01    | 17.81   | 11.14   | 15.44   | 28.96   | 22.20   | 17.28                 | 14.83   | 22.10   | 100.00  | 12.04   | 13.91   | 12.08   | 21.10   | 69.66   | 15.69   | 18.85   | 44.40   |
| Score                   | 0.20   |        | -0.80  | 0.22   | -0.22  | 1.00    | -0.19   | 1.00    | 1.50    | 0.75    | 0.50    | 1.50    | 0.75    | -0.17                 | 0.50    | 1.50    | 1.50    | -0.12   | 0.50    | -0.12   | 0.50    | 1.50    | 0.75    | 1.50    | 0.50    |
| Ion-type                | PR     | E      |        | LI     |        | E       | F       |         | y1      | b1      | IIIE-28 | y3      | b2      |                       | b3      | y4      | y5      |         | b4      |         | y6-H2O  | y6      | b5      | y7      | b6      |
| Delta ppm               | -1.8   |        |        | -10.8  |        | -11.3   |         | -4.8    | 16.8    | -41.4   | LE      | -10.6   | -5.1    |                       | -24.3   | 4.1     | 3.4     |         | -5.3    |         | -14.2   | -5.2    | -9.4    | -11.3   | -1.2    |

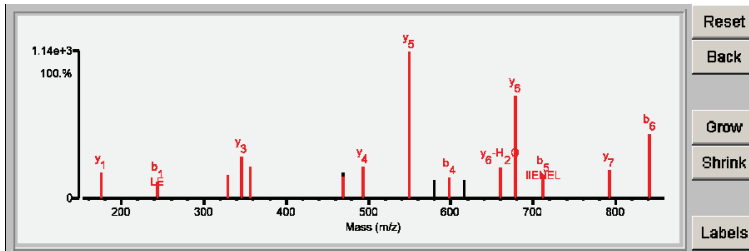

Result Summary

| Rank | Score | SPI (%) | BCS | # Unmatched ions | Variable sites | Sequence                        | MH <sup>+</sup> Calculated (Da) | MH <sup>+</sup> Error (Da) | MH <sup>+</sup> Error (ppm) | Protein MW/pI (Da) | Species | Accession # | Protein Name                                                      |
|------|-------|---------|-----|------------------|----------------|---------------------------------|---------------------------------|----------------------------|-----------------------------|--------------------|---------|-------------|-------------------------------------------------------------------|
| 1    | 14.62 | 72.2    | 9   | 10/25            | K123k          | (R)QYTSLLGKMNSEEEDEVWQVIIGAR(A) | 2895.4193                       | 114.0591                   | 5.4                         | 27131.0/5.68       | HUMAN   | Q9NR28      | Diablo homolog, mitochondrial OS=Homo sapiens GN=DIABLO PE=1 SV=1 |

Detailed Results

| Rank                   | Score | SPI (%)        | BCS     | # Unmatched ions | Variable sites | Sequence                        | MH <sup>+</sup> Calculated (Da) | MH <sup>+</sup> Error (Da) | MH <sup>+</sup> Error (ppm)  | Protein MW/pI (Da) | Species | Accession #                      | MS-Digest Index # | Protein Name                                                      |                       |         |                |         |                       |                                                 |                        |          |                               |                               |                        |                        |
|------------------------|-------|----------------|---------|------------------|----------------|---------------------------------|---------------------------------|----------------------------|------------------------------|--------------------|---------|----------------------------------|-------------------|-------------------------------------------------------------------|-----------------------|---------|----------------|---------|-----------------------|-------------------------------------------------|------------------------|----------|-------------------------------|-------------------------------|------------------------|------------------------|
| 1                      | 14.62 | 72.2           | 9       | 10/25            | K123k          | (R)QYTSLLGKMNSEEEDEVWQVIIGAR(A) | 2895.4193                       | 114.0591                   | 5.4                          | 27131.0/5.68       | HUMAN   | Q9NR28                           | 148915            | Diablo homolog, mitochondrial OS=Homo sapiens GN=DIABLO PE=1 SV=1 |                       |         |                |         |                       |                                                 |                        |          |                               |                               |                        |                        |
| Fragment-ion (m/z)     |       | 175.118        | 243.142 | 246.165          | 264.128        | 303.172                         | 416.268                         | 447.218 <sup>+2</sup>      | 471.789 <sup>+2</sup>        | 529.342            | 558.250 | 628.414                          | 688.352           | 756.467                                                           | 757.464 <sup>+3</sup> | 836.445 | 935.492        | 942.556 | 975.981 <sup>+2</sup> | 1010.332                                        | 1025.476 <sup>+2</sup> | 1041.605 | 1153.548                      | 1241.016 <sup>+2</sup>        | 1283.587 <sup>+2</sup> | 1360.182 <sup>+2</sup> |
| Frac. Inten.(% of TIC) |       | 2.64           | 2.64    | 2.56             | 5.34           | 7.67                            | 6.06                            | 2.79                       | 2.64                         | 8.17               | 3.11    | 5.79                             | 4.69              | 3.14                                                              | 2.52                  | 2.59    | 2.55           | 11.70   | 2.92                  | 3.21                                            | 2.94                   | 3.55     | 2.87                          | 2.82                          | 2.46                   | 2.63                   |
| Rel. Inten.(% of BP)   |       | 22.56          | 22.53   | 21.92            | 45.61          | 65.55                           | 51.75                           | 23.83                      | 22.58                        | 69.86              | 26.61   | 49.52                            | 40.10             | 26.87                                                             | 21.57                 | 22.16   | 21.78          | 100.00  | 24.98                 | 27.43                                           | 25.10                  | 30.30    | 24.49                         | 24.09                         | 21.03                  | 22.46                  |
| Score                  |       | 1.50           | -0.23   | 1.50             | 0.50           | 1.50                            | 1.50                            | -0.24                      | 1.50                         | 1.50               | -0.27   | 1.50                             | 0.25              | 1.50                                                              | -0.22                 | -0.22   | -0.22          | 1.50    | -0.25                 | -0.27                                           | 0.25                   | 1.50     | -0.24                         | 0.50                          | 0.50                   | -0.22                  |
| Ion-type               |       | y <sub>1</sub> |         | y <sub>2</sub>   | a <sub>2</sub> | y <sub>3</sub>                  | y <sub>4</sub>                  |                            | y <sub>6</sub> <sup>+2</sup> | y <sub>5</sub>     |         | y <sub>6</sub> -H <sub>2</sub> O | y <sub>7</sub>    |                                                                   |                       |         | y <sub>8</sub> |         |                       | b <sub>17</sub> -H <sub>2</sub> O <sup>+2</sup> | y <sub>9</sub>         |          | b <sub>20</sub> <sup>+2</sup> | a <sub>21</sub> <sup>+2</sup> |                        |                        |
| Delta ppm              |       | -3.7           |         | 35.1             | -26.4          | -17.6                           | 15.6                            |                            | 19.9                         | -7.7               |         | 0.7                              | -22.7             | -7.5                                                              |                       |         | 4.7            |         |                       | 18.0                                            | -14.4                  |          | -40.1                         | -18.8                         |                        |                        |

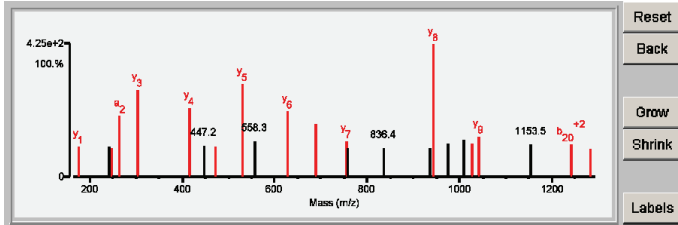





Result Summary

| Rank | Score | SPI (%) | BCS | # Unmatched Ions | Variable sites | Sequence                  | MH <sup>+</sup> Calculated (Da) | MH <sup>+</sup> Error (Da) | MH <sup>+</sup> Error (ppm) | Protein MW/pl (Da) | Species | Accession # | Protein Name                                                                                   |
|------|-------|---------|-----|------------------|----------------|---------------------------|---------------------------------|----------------------------|-----------------------------|--------------------|---------|-------------|------------------------------------------------------------------------------------------------|
| 1    | 19.34 | 88.9    | 7   | 4/25             | K158k          | (K)YKLLPEYPGVLSDVQEEK(G)  | 2107.0958                       | 114.0640                   | 9.5                         | 21452.9/6.85       | HUMAN   | P00374      | Dihydrofolate reductase OS=Homo sapiens GN=DHFR PE=1 SV=2                                      |
| 2    | 5.84  | 50.1    | 1   | 12/25            | M4936m K4935k  | (K)VKPGkHLVDVPMISIKPAK(I) | 2091.1453                       | 130.0144                   | -10.5                       | 629104.8/5.80      | HUMAN   | RQ09666     | REVERSE Neuroblast differentiation-associated protein AHNAK OS=Homo sapiens GN=AHNAK PE=1 SV=2 |
| 3    | 4.63  | 53.9    | 1   | 14/25            | None           | (R)KQHPYTFPGSGTVFARNTR(R) | 2221.1261                       | 0.0336                     | 15.1                        | 64733.1/8.63       | HUMAN   | Q10471      | Polypeptide N-acetylglucosaminyltransferase 2 OS=Homo sapiens GN=GALNT2 PE=1 SV=1              |

Detailed Results

| Rank | Score | SPI (%) | BCS | # Unmatched Ions | Variable sites | Sequence                 | MH <sup>+</sup> Calculated (Da) | MH <sup>+</sup> Error (Da) | MH <sup>+</sup> Error (ppm) | Protein MW/pl (Da) | Species | Accession # | MS-Digest Index # | Protein Name                                              |
|------|-------|---------|-----|------------------|----------------|--------------------------|---------------------------------|----------------------------|-----------------------------|--------------------|---------|-------------|-------------------|-----------------------------------------------------------|
| 1    | 19.34 | 88.9    | 7   | 4/25             | K158k          | (K)YKLLPEYPGVLSDVQEEK(G) | 2107.0958                       | 114.0640                   | 9.5                         | 21452.9/6.85       | HUMAN   | P00374      | 177907            | Dihydrofolate reductase OS=Homo sapiens GN=DHFR PE=1 SV=2 |

| Fragment-ion (m/z)      | 70.064 | 72.080 | 84.080 | 86.095 | 136.075 | 155.079 | 226.152 | 227.102 | 254.150 | 339.237 | 390.168 | 497.298 <sup>+2</sup> | 600.811 <sup>+2</sup> | 632.371 | 682.345 <sup>+2</sup> | 710.397 <sup>+2</sup> | 734.037 | 747.375 | 795.371 <sup>+2</sup> | 834.387 | 858.470 | 947.471 | 1021.537 | 1103.560 | 1200.617 |
|-------------------------|--------|--------|--------|--------|---------|---------|---------|---------|---------|---------|---------|-----------------------|-----------------------|---------|-----------------------|-----------------------|---------|---------|-----------------------|---------|---------|---------|----------|----------|----------|
| Frac. Inten. (% of TIC) | 0.01   | 0.16   | 0.05   | 0.18   | 0.39    | 5.99    | 2.27    | 2.18    | 4.21    | 3.16    | 2.22    | 2.36                  | 19.03                 | 5.52    | 2.76                  | 2.87                  | 2.70    | 2.50    | 2.20                  | 8.63    | 5.03    | 7.89    | 11.21    | 2.08     | 4.37     |
| Rel. Inten. (% of BP)   | 0.03   | 0.82   | 0.29   | 0.97   | 2.05    | 31.50   | 11.94   | 11.47   | 22.15   | 16.59   | 11.66   | 12.42                 | 100.00                | 29.00   | 14.52                 | 15.09                 | 14.17   | 13.15   | 11.58                 | 45.35   | 26.45   | 41.49   | 58.92    | 10.93    | 22.98    |
| Score                   | 0.20   | 0.50   | 0.50   | 0.22   | 1.00    | 0.75    | 0.50    | 0.75    | 0.75    | -0.17   | 0.75    | -0.12                 | 1.50                  | 0.50    | 1.50                  | -0.15                 | -0.14   | 1.50    | 1.50                  | 1.50    | 1.50    | 1.50    | 1.50     | 1.50     | 1.50     |
| Ion-type                | PR     | V      | KQ     | LI     | a1      | PG      | PGV-28  | PE      | PGV     | EYP     |         |                       | y11 <sup>+2</sup>     | b4      | y12 <sup>+2</sup>     |                       |         | y6      | y14 <sup>+2</sup>     | y7      | b6      | y8      | b7       | y10      | y11      |
| Delta ppm               | -13.2  | -10.8  | -6.8   | -13.1  | -14.6   | -21.9   | -16.4   | -8.1    | -2.0    |         |         |                       | 3.4                   | -10.3   | 6.0                   |                       |         | 30.6    | -21.9                 | 3.9     | -3.1    | 2.8     | 0.7      | 2.2      | 5.6      |

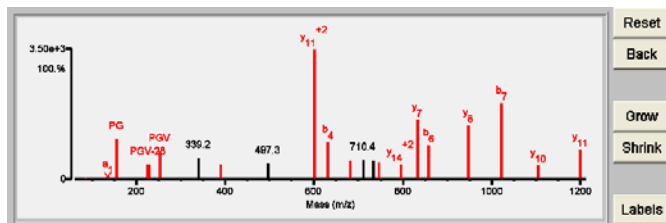

Result Summary

| Rank | Score | SPI (%) | BCS | # Unmatched Ions | Variable sites | Sequence                   | MH <sup>+</sup> Calculated (Da) | MH <sup>+</sup> Error (Da) | MH <sup>+</sup> Error (ppm) | Protein MW/pI (Da) | Species | Accession # | Protein Name                                              |
|------|-------|---------|-----|------------------|----------------|----------------------------|---------------------------------|----------------------------|-----------------------------|--------------------|---------|-------------|-----------------------------------------------------------|
| 1    | 12.30 | 68.7    | 7   | 7/25             | K158k K174k    | (K)YKLLPEYGVLSDVQEEKGIK(Y) | 2405.2963                       | 228.0943                   | 3.2                         | 21452.9/6.85       | HUMAN   | P00374      | Dihydrofolate reductase OS=Homo sapiens GN=DHFR PE=1 SV=2 |
| 2    | 9.15  | 58.7    | 6   | 9/25             | K158k K177k    | (K)YKLLPEYGVLSDVQEEKGIK(Y) | 2405.2963                       | 228.0943                   | 3.2                         | 21452.9/6.85       | HUMAN   | P00374      | Dihydrofolate reductase OS=Homo sapiens GN=DHFR PE=1 SV=2 |

Detailed Results

| Rank | Score | SPI (%) | BCS | # Unmatched Ions | Variable sites | Sequence                                                      | MH <sup>+</sup> Calculated (Da) | MH <sup>+</sup> Error (Da) | MH <sup>+</sup> Error (ppm) | Protein MW/pI (Da) | Species | Accession # | MS-Digest Index # | Protein Name                                              |
|------|-------|---------|-----|------------------|----------------|---------------------------------------------------------------|---------------------------------|----------------------------|-----------------------------|--------------------|---------|-------------|-------------------|-----------------------------------------------------------|
| 1    | 12.30 | 68.7    | 7   | 7/25             | K158k K174k    | (K) Y k L L I P E I Y / P / G V L S D V Q / E / E k G I K (Y) | 2405.2963                       | 228.0943                   | 3.2                         | 21452.9/6.85       | HUMAN   | P00374      | 177907            | Dihydrofolate reductase OS=Homo sapiens GN=DHFR PE=1 SV=2 |

  

| Fragment-ion (m/z)      | 70.066 | 72.079 | 84.079 | 86.097 | 101.072 | 120.080 | 129.099 | 136.073 | 147.107 | 300.177 | 316.124 | 454.242                | 472.238 | 519.261 | 538.289 <sup>+3</sup> | 616.362 | 619.327 | 632.366 | 688.385 | 729.412 <sup>+2</sup> | 758.396 <sup>+2</sup> | 806.934 <sup>+2</sup> | 817.433 | 858.482 | 888.951 |
|-------------------------|--------|--------|--------|--------|---------|---------|---------|---------|---------|---------|---------|------------------------|---------|---------|-----------------------|---------|---------|---------|---------|-----------------------|-----------------------|-----------------------|---------|---------|---------|
| Frac. Inten. (% of TIC) | 0.01   | 0.28   | 0.28   | 0.40   | 0.12    | 6.75    | 0.15    | 0.76    | 5.07    | 4.92    | 3.71    | 3.46                   | 3.46    | 3.84    | 10.55                 | 4.75    | 3.86    | 4.99    | 3.71    | 4.99                  | 4.22                  | 11.10                 | 6.33    | 8.88    | 3.42    |
| Rel. Inten. (% of BP)   | 0.07   | 2.53   | 2.49   | 3.59   | 1.07    | 60.80   | 1.33    | 6.86    | 45.68   | 44.27   | 33.45   | 31.16                  | 31.16   | 34.58   | 95.01                 | 42.74   | 34.74   | 44.95   | 33.41   | 44.91                 | 38.00                 | 100.00                | 57.02   | 80.02   | 30.84   |
| Score                   | 0.20   | 0.50   | 0.50   | 0.22   |         | -0.61   | 0.20    | 1.00    | 1.50    | 0.75    | -0.33   | 0.50                   | 0.75    | -0.35   | 1.50                  | -0.43   | -0.35   | 0.50    | 1.50    | -0.45                 | 1.50                  | 1.50                  | 0.50    | 0.50    | -0.31   |
| Ion-type                | PR     | V      | KQ     | LI     | KQ      |         | RKQ     | a1      | y1      | KG      |         | GVLSD-H <sub>2</sub> O | GVLSD   |         | y14 <sup>+3</sup>     |         |         | b4      | y5      |                       | y13 <sup>+2</sup>     | y14 <sup>+2</sup>     | y6      | b6      |         |
| Delta ppm               | 12.5   | -19.1  | -22.3  | 3.2    |         |         | -22.8   | -19.0   | -36.7   | 33.2    |         | 26.6                   | -3.6    |         | -0.8                  |         |         | -17.4   | -19.8   |                       | -11.3                 | 4.4                   | -10.4   | 11.2    |         |

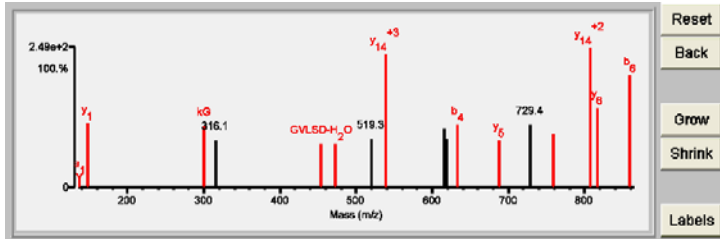

Result Summary

| Rank | Score | SPI (%) | BCS | # Unmatched Ions | Variable sites | Sequence                                                                                 | MH <sup>+</sup> Calculated (Da) | MH <sup>+</sup> Error (Da) | MH <sup>+</sup> Error (ppm) | Protein MW/pl (Da) | Species | Accession #            | Protein Name                                                   |
|------|-------|---------|-----|------------------|----------------|------------------------------------------------------------------------------------------|---------------------------------|----------------------------|-----------------------------|--------------------|---------|------------------------|----------------------------------------------------------------|
| 1    | 14.32 | 64.8    | 8   | 10/25            | K1121k         | (K)MQE <span style="color:red">V</span> ANLQYD <span style="color:red">DGS</span> GMR(E) | 2040.9477                       | 114.0569                   | 6.5                         | 126968.6/5.14      | HUMAN   | <a href="#">Q16531</a> | DNA damage-binding protein 1 OS=Homo sapiens GN=DDB1 PE=1 SV=1 |

Detailed Results

| Rank                   | Score  | SPI (%) | BCS     | # Unmatched Ions | Variable sites | Sequence                                                                  | MH <sup>+</sup> Calculated (Da) | MH <sup>+</sup> Error (Da) | MH <sup>+</sup> Error (ppm) | Protein MW/pl (Da)    | Species | Accession #            | MS-Digest Index #      | Protein Name                                                   |         |         |         |         |                       |                       |                       |         |                       |         |          |
|------------------------|--------|---------|---------|------------------|----------------|---------------------------------------------------------------------------|---------------------------------|----------------------------|-----------------------------|-----------------------|---------|------------------------|------------------------|----------------------------------------------------------------|---------|---------|---------|---------|-----------------------|-----------------------|-----------------------|---------|-----------------------|---------|----------|
| 1                      | 14.32  | 64.8    | 8       | 10/25            | K1121k         | (K) M Q/E <span style="color:red">V</span> /A/N/L Q/Y/D G/G S/G M K R (E) | 2040.9477                       | 114.0569                   | 6.5                         | 126968.6/5.14         | HUMAN   | <a href="#">Q16531</a> | <a href="#">152761</a> | DNA damage-binding protein 1 OS=Homo sapiens GN=DDB1 PE=1 SV=1 |         |         |         |         |                       |                       |                       |         |                       |         |          |
| Fragment-ion (m/z)     | 86.090 | 104.051 | 136.071 | 201.119          | 258.105        | 260.096                                                                   | 328.185                         | 339.159                    | 394.126                     | 488.216 <sup>+2</sup> | 490.256 | 571.736                | 593.228                | 605.310                                                        | 668.354 | 749.366 | 772.348 | 784.831 | 834.388 <sup>+2</sup> | 884.427 <sup>+2</sup> | 887.126 <sup>+2</sup> | 948.426 | 948.942 <sup>+2</sup> | 979.436 | 1142.481 |
| Frac. Inten.(% of TIC) | 2.89   | 13.13   | 0.10    | 4.58             | 4.75           | 5.64                                                                      | 4.32                            | 2.97                       | 2.84                        | 2.60                  | 3.22    | 2.64                   | 4.44                   | 2.51                                                           | 4.63    | 6.96    | 3.97    | 2.98    | 3.27                  | 4.41                  | 2.85                  | 5.20    | 2.62                  | 3.55    | 2.95     |
| Rel. Inten.(% of BP)   | 21.98  | 100.00  | 0.75    | 34.85            | 36.15          | 42.91                                                                     | 32.87                           | 22.59                      | 21.65                       | 19.83                 | 24.54   | 33.81                  | 19.08                  | 35.27                                                          | 52.99   | 30.23   | 22.69   | 24.90   | 33.58                 | 21.72                 | 39.56                 | 19.96   | 27.02                 | 22.43   |          |
| Score                  | -0.22  | 0.50    | 1.00    | -0.35            | 0.75           | 0.75                                                                      | 0.75                            | -0.23                      | 0.75                        | -0.20                 | -0.25   | 1.50                   | -0.34                  | 1.50                                                           | -0.35   | 1.50    | 0.50    | 1.50    | 1.50                  | -0.34                 | -0.22                 | 1.50    | -0.20                 | 1.50    | 1.50     |
| Ion-type               |        | a1      | Y       |                  | QE             | DGS                                                                       | EWV                             |                            | YDD                         |                       |         | y++9                   |                        | y4                                                             |         | y6      | b7      | y+++13  | y14 <sup>+2</sup>     |                       |                       | y++16   |                       | y8      | y9       |
| Delta ppm              |        | -22.5   | -32.3   |                  | -14.5          | 31.1                                                                      | -3.6                            |                            | 3.8                         |                       |         | -22.2                  |                        | -14.2                                                          |         | 33.5    | -23.4   | -37.1   | -7.6                  |                       |                       | -24.5   |                       | 10.3    | -7.2     |

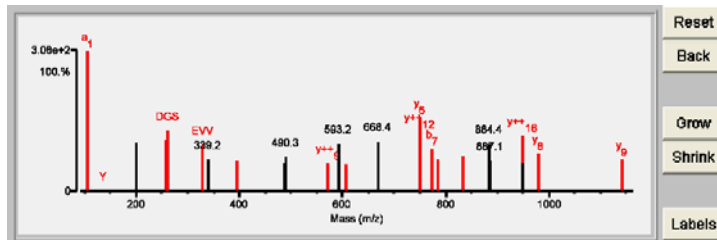

Result Summary

| Rank | Score | SPI (%) | BCS | # Unmatched Ions | Variable sites | Sequence               | MH <sup>+</sup> Calculated (Da) | MH <sup>+</sup> Error (Da) | MH <sup>+</sup> Error (ppm) | Protein MW/pl (Da) | Species | Accession # | Protein Name                                                   |
|------|-------|---------|-----|------------------|----------------|------------------------|---------------------------------|----------------------------|-----------------------------|--------------------|---------|-------------|----------------------------------------------------------------|
| 1    | 14.96 | 80.8    | 7   | 5/25             | K1131k         | (R)EATADDLTKVVEELTR(I) | 1801.9542                       | 114.0537                   | 5.6                         | 126968.6/5.14      | HUMAN   | Q16531      | DNA damage-binding protein 1 OS=Homo sapiens GN=DDB1 PE=1 SV=1 |

Detailed Results

| Rank                                                                                                                                                                                                                                                                                                                                                                                                                                                                                                                                                                                                                                                                                                                                                                                                                                                                                                                                                                                                                                                                                                                                                                                                                                                                                                                                                                                                                                                                                                                                                                                                                                                                                                                                                                                                                                                                                                                                                                                                                                                                                                                                                                                                                                                                                                                                                                                                                                                                                                                                                                                                                                                                                                                                                    | Score  | SPI (%) | BCS     | # Unmatched Ions    | Variable sites | Sequence                         | MH <sup>+</sup> Calculated (Da) | MH <sup>+</sup> Error (Da)       | MH <sup>+</sup> Error (ppm) | Protein MW/pl (Da) | Species        | Accession # | MS-Digest Index # | Protein Name                                                   |                       |                |                                  |                              |                |                                  |                |                                  |                |                |         |         |         |         |         |                       |         |         |                       |         |         |         |         |         |         |         |                         |      |      |      |      |      |      |      |      |      |      |      |      |      |      |      |      |      |      |       |      |      |      |      |      |      |                       |      |       |      |       |       |       |       |       |       |       |       |       |       |       |       |       |       |       |        |       |       |       |       |       |       |       |      |       |      |       |      |      |      |      |      |      |      |      |       |      |       |      |      |      |      |      |      |      |      |      |       |          |   |    |    |                     |    |                                  |    |                                  |       |    |                |  |  |    |  |                |                                  |                              |                |                                  |                |                                  |                |                |           |       |       |      |   |      |     |     |     |       |       |      |     |       |     |  |      |       |       |     |     |     |       |     |      |
|---------------------------------------------------------------------------------------------------------------------------------------------------------------------------------------------------------------------------------------------------------------------------------------------------------------------------------------------------------------------------------------------------------------------------------------------------------------------------------------------------------------------------------------------------------------------------------------------------------------------------------------------------------------------------------------------------------------------------------------------------------------------------------------------------------------------------------------------------------------------------------------------------------------------------------------------------------------------------------------------------------------------------------------------------------------------------------------------------------------------------------------------------------------------------------------------------------------------------------------------------------------------------------------------------------------------------------------------------------------------------------------------------------------------------------------------------------------------------------------------------------------------------------------------------------------------------------------------------------------------------------------------------------------------------------------------------------------------------------------------------------------------------------------------------------------------------------------------------------------------------------------------------------------------------------------------------------------------------------------------------------------------------------------------------------------------------------------------------------------------------------------------------------------------------------------------------------------------------------------------------------------------------------------------------------------------------------------------------------------------------------------------------------------------------------------------------------------------------------------------------------------------------------------------------------------------------------------------------------------------------------------------------------------------------------------------------------------------------------------------------------|--------|---------|---------|---------------------|----------------|----------------------------------|---------------------------------|----------------------------------|-----------------------------|--------------------|----------------|-------------|-------------------|----------------------------------------------------------------|-----------------------|----------------|----------------------------------|------------------------------|----------------|----------------------------------|----------------|----------------------------------|----------------|----------------|---------|---------|---------|---------|---------|-----------------------|---------|---------|-----------------------|---------|---------|---------|---------|---------|---------|---------|-------------------------|------|------|------|------|------|------|------|------|------|------|------|------|------|------|------|------|------|------|-------|------|------|------|------|------|------|-----------------------|------|-------|------|-------|-------|-------|-------|-------|-------|-------|-------|-------|-------|-------|-------|-------|-------|-------|--------|-------|-------|-------|-------|-------|-------|-------|------|-------|------|-------|------|------|------|------|------|------|------|------|-------|------|-------|------|------|------|------|------|------|------|------|------|-------|----------|---|----|----|---------------------|----|----------------------------------|----|----------------------------------|-------|----|----------------|--|--|----|--|----------------|----------------------------------|------------------------------|----------------|----------------------------------|----------------|----------------------------------|----------------|----------------|-----------|-------|-------|------|---|------|-----|-----|-----|-------|-------|------|-----|-------|-----|--|------|-------|-------|-----|-----|-----|-------|-----|------|
| 1                                                                                                                                                                                                                                                                                                                                                                                                                                                                                                                                                                                                                                                                                                                                                                                                                                                                                                                                                                                                                                                                                                                                                                                                                                                                                                                                                                                                                                                                                                                                                                                                                                                                                                                                                                                                                                                                                                                                                                                                                                                                                                                                                                                                                                                                                                                                                                                                                                                                                                                                                                                                                                                                                                                                                       | 14.96  | 80.8    | 7       | 5/25                | K1131k         | (R)EATADDLTKVVEELTR(I)           | 1801.9542                       | 114.0537                         | 5.6                         | 126968.6/5.14      | HUMAN          | Q16531      | 152761            | DNA damage-binding protein 1 OS=Homo sapiens GN=DDB1 PE=1 SV=1 |                       |                |                                  |                              |                |                                  |                |                                  |                |                |         |         |         |         |         |                       |         |         |                       |         |         |         |         |         |         |         |                         |      |      |      |      |      |      |      |      |      |      |      |      |      |      |      |      |      |      |       |      |      |      |      |      |      |                       |      |       |      |       |       |       |       |       |       |       |       |       |       |       |       |       |       |       |        |       |       |       |       |       |       |       |      |       |      |       |      |      |      |      |      |      |      |      |       |      |       |      |      |      |      |      |      |      |      |      |       |          |   |    |    |                     |    |                                  |    |                                  |       |    |                |  |  |    |  |                |                                  |                              |                |                                  |                |                                  |                |                |           |       |       |      |   |      |     |     |     |       |       |      |     |       |     |  |      |       |       |     |     |     |       |     |      |
| <table border="1"> <thead> <tr> <th>Fragment-Ion (m/z)</th> <th>72.078</th> <th>84.079</th> <th>102.055</th> <th>141.106</th> <th>155.082</th> <th>173.095</th> <th>183.079</th> <th>215.135</th> <th>284.122</th> <th>314.223</th> <th>342.217</th> <th>389.236</th> <th>397.166</th> <th>455.301</th> <th>498.232<sup>+3</sup></th> <th>518.290</th> <th>585.208</th> <th>600.839<sup>+2</sup></th> <th>647.337</th> <th>698.304</th> <th>746.407</th> <th>811.376</th> <th>829.398</th> <th>845.484</th> <th>953.503</th> </tr> </thead> <tbody> <tr> <td>Frac. Inten. (% of TIC)</td> <td>0.31</td> <td>6.55</td> <td>0.15</td> <td>4.48</td> <td>3.09</td> <td>6.83</td> <td>3.42</td> <td>3.26</td> <td>2.42</td> <td>2.68</td> <td>2.41</td> <td>2.39</td> <td>3.36</td> <td>2.54</td> <td>2.42</td> <td>4.61</td> <td>3.39</td> <td>4.96</td> <td>10.72</td> <td>7.08</td> <td>8.47</td> <td>3.28</td> <td>3.87</td> <td>4.87</td> <td>2.42</td> </tr> <tr> <td>Rel. Inten. (% of BP)</td> <td>2.93</td> <td>61.14</td> <td>1.41</td> <td>41.82</td> <td>28.82</td> <td>63.76</td> <td>31.87</td> <td>30.46</td> <td>22.56</td> <td>24.96</td> <td>22.45</td> <td>22.34</td> <td>31.36</td> <td>23.69</td> <td>22.62</td> <td>43.03</td> <td>31.67</td> <td>46.31</td> <td>100.00</td> <td>66.07</td> <td>79.02</td> <td>30.60</td> <td>36.07</td> <td>45.40</td> <td>22.56</td> </tr> <tr> <td>Score</td> <td>0.50</td> <td>-0.61</td> <td>1.00</td> <td>-0.42</td> <td>0.50</td> <td>0.75</td> <td>0.25</td> <td>0.75</td> <td>0.25</td> <td>0.50</td> <td>0.75</td> <td>1.50</td> <td>-0.31</td> <td>0.75</td> <td>-0.23</td> <td>1.50</td> <td>0.25</td> <td>1.50</td> <td>1.50</td> <td>0.25</td> <td>1.50</td> <td>0.25</td> <td>0.50</td> <td>1.50</td> <td>-0.23</td> </tr> <tr> <td>Ion-type</td> <td>V</td> <td>a1</td> <td>a1</td> <td>TA-H<sub>2</sub>O</td> <td>a2</td> <td>b<sub>2</sub>-H<sub>2</sub>O</td> <td>LT</td> <td>b<sub>3</sub>-H<sub>2</sub>O</td> <td>kV-28</td> <td>kV</td> <td>y<sub>3</sub></td> <td></td> <td></td> <td>kV</td> <td></td> <td>y<sub>4</sub></td> <td>b<sub>6</sub>-H<sub>2</sub>O</td> <td>y<sub>9</sub><sup>+2</sup></td> <td>y<sub>5</sub></td> <td>b<sub>7</sub>-H<sub>2</sub>O</td> <td>y<sub>6</sub></td> <td>b<sub>8</sub>-H<sub>2</sub>O</td> <td>b<sub>8</sub></td> <td>y<sub>7</sub></td> </tr> <tr> <td>Delta ppm</td> <td>-38.5</td> <td>-12.3</td> <td>10.0</td> <td>E</td> <td>-5.8</td> <td>7.7</td> <td>7.7</td> <td>5.9</td> <td>-22.4</td> <td>-12.3</td> <td>10.6</td> <td>7.7</td> <td>-37.2</td> <td>5.0</td> <td></td> <td>-6.7</td> <td>-13.8</td> <td>-20.6</td> <td>1.6</td> <td>5.4</td> <td>4.2</td> <td>-10.5</td> <td>3.3</td> <td>12.9</td> </tr> </tbody> </table> |        |         |         |                     |                |                                  |                                 |                                  |                             |                    |                |             |                   |                                                                | Fragment-Ion (m/z)    | 72.078         | 84.079                           | 102.055                      | 141.106        | 155.082                          | 173.095        | 183.079                          | 215.135        | 284.122        | 314.223 | 342.217 | 389.236 | 397.166 | 455.301 | 498.232 <sup>+3</sup> | 518.290 | 585.208 | 600.839 <sup>+2</sup> | 647.337 | 698.304 | 746.407 | 811.376 | 829.398 | 845.484 | 953.503 | Frac. Inten. (% of TIC) | 0.31 | 6.55 | 0.15 | 4.48 | 3.09 | 6.83 | 3.42 | 3.26 | 2.42 | 2.68 | 2.41 | 2.39 | 3.36 | 2.54 | 2.42 | 4.61 | 3.39 | 4.96 | 10.72 | 7.08 | 8.47 | 3.28 | 3.87 | 4.87 | 2.42 | Rel. Inten. (% of BP) | 2.93 | 61.14 | 1.41 | 41.82 | 28.82 | 63.76 | 31.87 | 30.46 | 22.56 | 24.96 | 22.45 | 22.34 | 31.36 | 23.69 | 22.62 | 43.03 | 31.67 | 46.31 | 100.00 | 66.07 | 79.02 | 30.60 | 36.07 | 45.40 | 22.56 | Score | 0.50 | -0.61 | 1.00 | -0.42 | 0.50 | 0.75 | 0.25 | 0.75 | 0.25 | 0.50 | 0.75 | 1.50 | -0.31 | 0.75 | -0.23 | 1.50 | 0.25 | 1.50 | 1.50 | 0.25 | 1.50 | 0.25 | 0.50 | 1.50 | -0.23 | Ion-type | V | a1 | a1 | TA-H <sub>2</sub> O | a2 | b <sub>2</sub> -H <sub>2</sub> O | LT | b <sub>3</sub> -H <sub>2</sub> O | kV-28 | kV | y <sub>3</sub> |  |  | kV |  | y <sub>4</sub> | b <sub>6</sub> -H <sub>2</sub> O | y <sub>9</sub> <sup>+2</sup> | y <sub>5</sub> | b <sub>7</sub> -H <sub>2</sub> O | y <sub>6</sub> | b <sub>8</sub> -H <sub>2</sub> O | b <sub>8</sub> | y <sub>7</sub> | Delta ppm | -38.5 | -12.3 | 10.0 | E | -5.8 | 7.7 | 7.7 | 5.9 | -22.4 | -12.3 | 10.6 | 7.7 | -37.2 | 5.0 |  | -6.7 | -13.8 | -20.6 | 1.6 | 5.4 | 4.2 | -10.5 | 3.3 | 12.9 |
| Fragment-Ion (m/z)                                                                                                                                                                                                                                                                                                                                                                                                                                                                                                                                                                                                                                                                                                                                                                                                                                                                                                                                                                                                                                                                                                                                                                                                                                                                                                                                                                                                                                                                                                                                                                                                                                                                                                                                                                                                                                                                                                                                                                                                                                                                                                                                                                                                                                                                                                                                                                                                                                                                                                                                                                                                                                                                                                                                      | 72.078 | 84.079  | 102.055 | 141.106             | 155.082        | 173.095                          | 183.079                         | 215.135                          | 284.122                     | 314.223            | 342.217        | 389.236     | 397.166           | 455.301                                                        | 498.232 <sup>+3</sup> | 518.290        | 585.208                          | 600.839 <sup>+2</sup>        | 647.337        | 698.304                          | 746.407        | 811.376                          | 829.398        | 845.484        | 953.503 |         |         |         |         |                       |         |         |                       |         |         |         |         |         |         |         |                         |      |      |      |      |      |      |      |      |      |      |      |      |      |      |      |      |      |      |       |      |      |      |      |      |      |                       |      |       |      |       |       |       |       |       |       |       |       |       |       |       |       |       |       |       |        |       |       |       |       |       |       |       |      |       |      |       |      |      |      |      |      |      |      |      |       |      |       |      |      |      |      |      |      |      |      |      |       |          |   |    |    |                     |    |                                  |    |                                  |       |    |                |  |  |    |  |                |                                  |                              |                |                                  |                |                                  |                |                |           |       |       |      |   |      |     |     |     |       |       |      |     |       |     |  |      |       |       |     |     |     |       |     |      |
| Frac. Inten. (% of TIC)                                                                                                                                                                                                                                                                                                                                                                                                                                                                                                                                                                                                                                                                                                                                                                                                                                                                                                                                                                                                                                                                                                                                                                                                                                                                                                                                                                                                                                                                                                                                                                                                                                                                                                                                                                                                                                                                                                                                                                                                                                                                                                                                                                                                                                                                                                                                                                                                                                                                                                                                                                                                                                                                                                                                 | 0.31   | 6.55    | 0.15    | 4.48                | 3.09           | 6.83                             | 3.42                            | 3.26                             | 2.42                        | 2.68               | 2.41           | 2.39        | 3.36              | 2.54                                                           | 2.42                  | 4.61           | 3.39                             | 4.96                         | 10.72          | 7.08                             | 8.47           | 3.28                             | 3.87           | 4.87           | 2.42    |         |         |         |         |                       |         |         |                       |         |         |         |         |         |         |         |                         |      |      |      |      |      |      |      |      |      |      |      |      |      |      |      |      |      |      |       |      |      |      |      |      |      |                       |      |       |      |       |       |       |       |       |       |       |       |       |       |       |       |       |       |       |        |       |       |       |       |       |       |       |      |       |      |       |      |      |      |      |      |      |      |      |       |      |       |      |      |      |      |      |      |      |      |      |       |          |   |    |    |                     |    |                                  |    |                                  |       |    |                |  |  |    |  |                |                                  |                              |                |                                  |                |                                  |                |                |           |       |       |      |   |      |     |     |     |       |       |      |     |       |     |  |      |       |       |     |     |     |       |     |      |
| Rel. Inten. (% of BP)                                                                                                                                                                                                                                                                                                                                                                                                                                                                                                                                                                                                                                                                                                                                                                                                                                                                                                                                                                                                                                                                                                                                                                                                                                                                                                                                                                                                                                                                                                                                                                                                                                                                                                                                                                                                                                                                                                                                                                                                                                                                                                                                                                                                                                                                                                                                                                                                                                                                                                                                                                                                                                                                                                                                   | 2.93   | 61.14   | 1.41    | 41.82               | 28.82          | 63.76                            | 31.87                           | 30.46                            | 22.56                       | 24.96              | 22.45          | 22.34       | 31.36             | 23.69                                                          | 22.62                 | 43.03          | 31.67                            | 46.31                        | 100.00         | 66.07                            | 79.02          | 30.60                            | 36.07          | 45.40          | 22.56   |         |         |         |         |                       |         |         |                       |         |         |         |         |         |         |         |                         |      |      |      |      |      |      |      |      |      |      |      |      |      |      |      |      |      |      |       |      |      |      |      |      |      |                       |      |       |      |       |       |       |       |       |       |       |       |       |       |       |       |       |       |       |        |       |       |       |       |       |       |       |      |       |      |       |      |      |      |      |      |      |      |      |       |      |       |      |      |      |      |      |      |      |      |      |       |          |   |    |    |                     |    |                                  |    |                                  |       |    |                |  |  |    |  |                |                                  |                              |                |                                  |                |                                  |                |                |           |       |       |      |   |      |     |     |     |       |       |      |     |       |     |  |      |       |       |     |     |     |       |     |      |
| Score                                                                                                                                                                                                                                                                                                                                                                                                                                                                                                                                                                                                                                                                                                                                                                                                                                                                                                                                                                                                                                                                                                                                                                                                                                                                                                                                                                                                                                                                                                                                                                                                                                                                                                                                                                                                                                                                                                                                                                                                                                                                                                                                                                                                                                                                                                                                                                                                                                                                                                                                                                                                                                                                                                                                                   | 0.50   | -0.61   | 1.00    | -0.42               | 0.50           | 0.75                             | 0.25                            | 0.75                             | 0.25                        | 0.50               | 0.75           | 1.50        | -0.31             | 0.75                                                           | -0.23                 | 1.50           | 0.25                             | 1.50                         | 1.50           | 0.25                             | 1.50           | 0.25                             | 0.50           | 1.50           | -0.23   |         |         |         |         |                       |         |         |                       |         |         |         |         |         |         |         |                         |      |      |      |      |      |      |      |      |      |      |      |      |      |      |      |      |      |      |       |      |      |      |      |      |      |                       |      |       |      |       |       |       |       |       |       |       |       |       |       |       |       |       |       |       |        |       |       |       |       |       |       |       |      |       |      |       |      |      |      |      |      |      |      |      |       |      |       |      |      |      |      |      |      |      |      |      |       |          |   |    |    |                     |    |                                  |    |                                  |       |    |                |  |  |    |  |                |                                  |                              |                |                                  |                |                                  |                |                |           |       |       |      |   |      |     |     |     |       |       |      |     |       |     |  |      |       |       |     |     |     |       |     |      |
| Ion-type                                                                                                                                                                                                                                                                                                                                                                                                                                                                                                                                                                                                                                                                                                                                                                                                                                                                                                                                                                                                                                                                                                                                                                                                                                                                                                                                                                                                                                                                                                                                                                                                                                                                                                                                                                                                                                                                                                                                                                                                                                                                                                                                                                                                                                                                                                                                                                                                                                                                                                                                                                                                                                                                                                                                                | V      | a1      | a1      | TA-H <sub>2</sub> O | a2             | b <sub>2</sub> -H <sub>2</sub> O | LT                              | b <sub>3</sub> -H <sub>2</sub> O | kV-28                       | kV                 | y <sub>3</sub> |             |                   | kV                                                             |                       | y <sub>4</sub> | b <sub>6</sub> -H <sub>2</sub> O | y <sub>9</sub> <sup>+2</sup> | y <sub>5</sub> | b <sub>7</sub> -H <sub>2</sub> O | y <sub>6</sub> | b <sub>8</sub> -H <sub>2</sub> O | b <sub>8</sub> | y <sub>7</sub> |         |         |         |         |         |                       |         |         |                       |         |         |         |         |         |         |         |                         |      |      |      |      |      |      |      |      |      |      |      |      |      |      |      |      |      |      |       |      |      |      |      |      |      |                       |      |       |      |       |       |       |       |       |       |       |       |       |       |       |       |       |       |       |        |       |       |       |       |       |       |       |      |       |      |       |      |      |      |      |      |      |      |      |       |      |       |      |      |      |      |      |      |      |      |      |       |          |   |    |    |                     |    |                                  |    |                                  |       |    |                |  |  |    |  |                |                                  |                              |                |                                  |                |                                  |                |                |           |       |       |      |   |      |     |     |     |       |       |      |     |       |     |  |      |       |       |     |     |     |       |     |      |
| Delta ppm                                                                                                                                                                                                                                                                                                                                                                                                                                                                                                                                                                                                                                                                                                                                                                                                                                                                                                                                                                                                                                                                                                                                                                                                                                                                                                                                                                                                                                                                                                                                                                                                                                                                                                                                                                                                                                                                                                                                                                                                                                                                                                                                                                                                                                                                                                                                                                                                                                                                                                                                                                                                                                                                                                                                               | -38.5  | -12.3   | 10.0    | E                   | -5.8           | 7.7                              | 7.7                             | 5.9                              | -22.4                       | -12.3              | 10.6           | 7.7         | -37.2             | 5.0                                                            |                       | -6.7           | -13.8                            | -20.6                        | 1.6            | 5.4                              | 4.2            | -10.5                            | 3.3            | 12.9           |         |         |         |         |         |                       |         |         |                       |         |         |         |         |         |         |         |                         |      |      |      |      |      |      |      |      |      |      |      |      |      |      |      |      |      |      |       |      |      |      |      |      |      |                       |      |       |      |       |       |       |       |       |       |       |       |       |       |       |       |       |       |       |        |       |       |       |       |       |       |       |      |       |      |       |      |      |      |      |      |      |      |      |       |      |       |      |      |      |      |      |      |      |      |      |       |          |   |    |    |                     |    |                                  |    |                                  |       |    |                |  |  |    |  |                |                                  |                              |                |                                  |                |                                  |                |                |           |       |       |      |   |      |     |     |     |       |       |      |     |       |     |  |      |       |       |     |     |     |       |     |      |

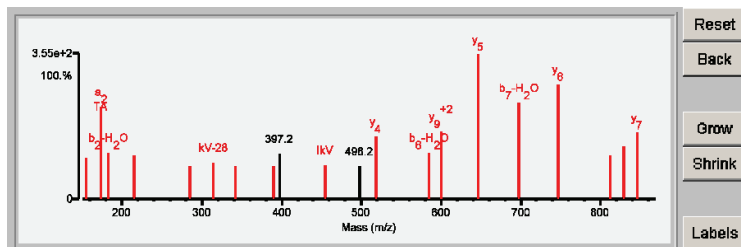

Reset  
Back  
Grow  
Shrink  
Labels

Result Summary

| Rank | Score | SP1 (%) | BCS | # Unmatched Ions | Variable sites | Sequence                                      | MH <sup>+</sup> Calculated (Da) | MH <sup>+</sup> Error (Da) | MH <sup>+</sup> Error (ppm) | Protein MW/pl (Da) | Species | Accession # | Protein Name                                                            |
|------|-------|---------|-----|------------------|----------------|-----------------------------------------------|---------------------------------|----------------------------|-----------------------------|--------------------|---------|-------------|-------------------------------------------------------------------------|
| 1    | 21.81 | 87.6    | 15  | 3/25             | K600k          | (R)SVLHEVMEQQTL <del>SL</del> AKAGIICQLNAR(T) | 2909.5336                       | 114.0870                   | 14.6                        | 96558.4/6.28       | HUMAN   | P33991      | DNA replication licensing factor MCM4 OS=Homo sapiens GN=MCM4 PE=1 SV=5 |

Detailed Results

| Rank                    | Score | SP1 (%) | BCS | # Unmatched Ions | Variable sites | Sequence                                      | MH <sup>+</sup> Calculated (Da) | MH <sup>+</sup> Error (Da) | MH <sup>+</sup> Error (ppm) | Protein MW/pl (Da) | Species | Accession # | MS-Digest Index # | Protein Name                                                            |         |                       |                       |         |                       |                       |         |         |                       |                       |         |                       |                       |         |                        |          |          |
|-------------------------|-------|---------|-----|------------------|----------------|-----------------------------------------------|---------------------------------|----------------------------|-----------------------------|--------------------|---------|-------------|-------------------|-------------------------------------------------------------------------|---------|-----------------------|-----------------------|---------|-----------------------|-----------------------|---------|---------|-----------------------|-----------------------|---------|-----------------------|-----------------------|---------|------------------------|----------|----------|
| 1                       | 21.81 | 87.6    | 15  | 3/25             | K600k          | (R)SVLHEVMEQQTL <del>SL</del> AKAGIICQLNAR(T) | 2909.5336                       | 114.0870                   | 14.6                        | 96558.4/6.28       | HUMAN   | P33991      | 381743            | DNA replication licensing factor MCM4 OS=Homo sapiens GN=MCM4 PE=1 SV=5 |         |                       |                       |         |                       |                       |         |         |                       |                       |         |                       |                       |         |                        |          |          |
| Fragment-ion (m/z)      |       |         |     |                  |                |                                               | 72.080                          | 84.044                     | 84.081                      | 86.096             | 166.084 | 251.152     | 360.200           | 473.288                                                                 | 601.345 | 632.811 <sup>+2</sup> | 641.810 <sup>+2</sup> | 665.366 | 679.382 <sup>+2</sup> | 714.894 <sup>+2</sup> | 761.380 | 796.409 | 814.956 <sup>+2</sup> | 871.500 <sup>+2</sup> | 874.464 | 875.476 <sup>+2</sup> | 922.036 <sup>+2</sup> | 925.464 | 1001.000 <sup>+2</sup> | 1044.574 | 1115.612 |
| Frac. Inten. (% of TIC) |       |         |     |                  |                |                                               | 0.24                            | 0.13                       | 0.22                        | 0.33               | 3.99    | 4.62        | 3.30              | 2.98                                                                    | 3.44    | 5.35                  | 5.20                  | 6.55    | 3.88                  | 6.88                  | 8.81    | 3.58    | 7.30                  | 3.27                  | 3.73    | 3.14                  | 3.34                  | 4.02    | 5.31                   | 5.87     | 4.55     |
| Rel. Inten. (% of BP)   |       |         |     |                  |                |                                               | 2.70                            | 1.42                       | 2.46                        | 3.74               | 45.26   | 52.41       | 37.42             | 33.79                                                                   | 39.10   | 60.72                 | 58.98                 | 74.36   | 44.05                 | 78.15                 | 100.00  | 40.84   | 82.87                 | 37.09                 | 42.34   | 35.68                 | 37.86                 | 45.64   | 60.22                  | 66.62    | 51.64    |
| Score                   |       |         |     |                  |                |                                               | 0.50                            | 1.00                       | 0.50                        | 0.22               | -0.45   | 0.75        | 1.50              | 1.50                                                                    | 1.50    | 0.25                  | 0.50                  | 1.50    | 1.50                  | 0.50                  | 1.50    | 1.50    | 0.50                  | 1.50                  | 1.50    | 1.50                  | -0.36                 | 1.50    | 0.50                   | 1.50     | 1.50     |
| Ion-type                |       |         |     |                  |                |                                               | V                               | E                          | KQ                          | LI                 | LH      | Y3          | Y4                | Y5                                                                      | Y6      | b11-H2O <sup>+2</sup> | b11 <sup>+2</sup>     | b6      | y11 <sup>+2</sup>     | y12 <sup>+2</sup>     | y6      | b7      | y14 <sup>+2</sup>     | y15 <sup>+2</sup>     | y7      | b8                    | y9                    | y10     |                        |          |          |
| Delta ppm               |       |         |     |                  |                |                                               | -13.5                           | -3.5                       | -3.3                        | -6.1               |         | 2.6         | 3.3               | 9.6                                                                     | 5.9     | b11-H2O <sup>+2</sup> | 11.4                  | 2.2     | 5.3                   | 14.6                  | 5.1     | 10.0    | 7.8                   | 8.6                   | 11.0    | 8.5                   | 23.3                  | 19.3    |                        | 11.1     | 11.9     |

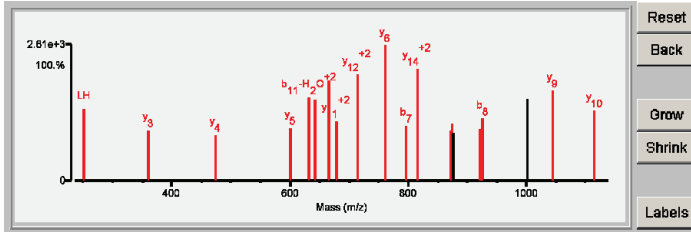

Result Summary

| Rank | Score | SPI (%) | BCS | # Unmatched Ions | Variable sites | Sequence             | MH <sup>+</sup> Calculated (Da) | MH <sup>+</sup> Error (Da) | MH <sup>+</sup> Error (ppm) | Protein MW/pi (Da) | Species | Accession # | Protein Name                                                            |
|------|-------|---------|-----|------------------|----------------|----------------------|---------------------------------|----------------------------|-----------------------------|--------------------|---------|-------------|-------------------------------------------------------------------------|
| 1    | 14.11 | 76.9    | 9   | 5/25             | K145k          | (R)RFELYFGPSSNKPR(V) | 1825.9344                       | 114.0614                   | 9.5                         | 81308.4/6.08       | HUMAN   | P33993      | DNA replication licensing factor MCM7 OS=Homo sapiens GN=MCM7 PE=1 SV=4 |

Detailed Results

| Rank | Score | SPI (%) | BCS | # Unmatched Ions | Variable sites | Sequence                                   | MH <sup>+</sup> Calculated (Da) | MH <sup>+</sup> Error (Da) | MH <sup>+</sup> Error (ppm) | Protein MW/pi (Da) | Species | Accession # | MS-Digest Index # | Protein Name                                                            |
|------|-------|---------|-----|------------------|----------------|--------------------------------------------|---------------------------------|----------------------------|-----------------------------|--------------------|---------|-------------|-------------------|-------------------------------------------------------------------------|
| 1    | 14.11 | 76.9    | 9   | 5/25             | K145k          | (R)R F E \L \Y \F Q /G P /S /N k /P /R (V) | 1825.9344                       | 114.0614                   | 9.5                         | 81308.4/6.08       | HUMAN   | P33993      | 190904            | DNA replication licensing factor MCM7 OS=Homo sapiens GN=MCM7 PE=1 SV=4 |

| Fragment-ion (m/z)      | 70.065 | 72.080 | 84.045 | 84.080 | 86.095 | 101.069 | 103.053 | 120.080 | 136.074 | 140.081 | 175.117 | 259.154 | 272.167 | 354.173 | 405.223 | 433.219 | 518.308 | 533.259 <sup>+2</sup> | 546.301 | 628.343 | 681.375 | 709.370 | 715.382 | 802.420 | 956.500 |
|-------------------------|--------|--------|--------|--------|--------|---------|---------|---------|---------|---------|---------|---------|---------|---------|---------|---------|---------|-----------------------|---------|---------|---------|---------|---------|---------|---------|
| Frac. Inten. (% of TIC) | 0.02   | 5.07   | 0.25   | 0.47   | 0.57   | 0.16    | 3.77    | 0.81    | 0.98    | 3.45    | 5.98    | 3.39    | 5.11    | 4.36    | 4.13    | 11.20   | 4.74    | 6.47                  | 10.13   | 2.76    | 5.28    | 9.20    | 4.15    | 4.13    | 3.42    |
| Rel. Inten. (% of BP)   | 0.15   | 45.25  | 2.25   | 4.23   | 5.05   | 1.44    | 33.64   | 7.27    | 8.76    | 30.80   | 53.35   | 30.23   | 45.65   | 38.95   | 36.89   | 100.00  | 42.32   | 57.78                 | 90.48   | 24.61   | 47.15   | 82.17   | 37.01   | 36.84   | 30.50   |
| Score                   | 0.20   | -0.45  | 1.00   | 0.50   | 0.22   |         | -0.34   | 1.00    | 1.00    | 0.25    | 1.50    | -0.30   | 1.50    | -0.39   | 0.50    | 0.50    | 0.50    | -0.58                 | 0.50    | 1.50    | 0.50    | 1.50    | 1.50    | 1.50    | 1.50    |
| Ion-type                | PR     |        | E      | KQ     | LI     | KQ      |         | F       | Y       | b1-NH3  | y1      |         | y2      | a3      | b3      | a4      |         | b4                    | y4      | a5      | b5      | y5      | y6      | a7      |         |
| Delta ppm               | -7.5   |        | 2.5    | -5.7   | -18.9  |         |         | -5.6    | -10.2   | -17.4   | -11.7   |         | -16.2   |         | -6.4    | -2.3    | -2.4    |                       | -7.2    | -14.5   | 3.1     | 2.4     | -3.0    | 3.8     | 0.0     |
|                         |        |        |        |        |        |         |         |         |         |         |         |         |         |         |         |         |         |                       |         |         |         |         |         |         | 9.6     |

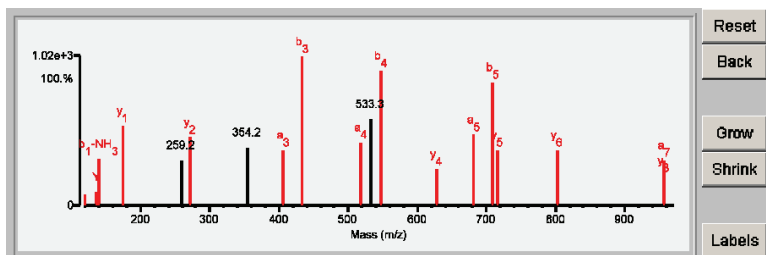

Result Summary

| Rank | Score | SPI (%) | BCS | # Unmatched ions | Variable sites | Sequence                | MH <sup>+</sup> Calculated (Da) | MH <sup>+</sup> Error (Da) | MH <sup>+</sup> Error (ppm) | Protein MW/pl (Da) | Species | Accession # | Protein Name                                                            |
|------|-------|---------|-----|------------------|----------------|-------------------------|---------------------------------|----------------------------|-----------------------------|--------------------|---------|-------------|-------------------------------------------------------------------------|
| 1    | 12.54 | 67.0    | 6   | 7/25             | K75k           | (R)YAKLFADAVQELLPQYK(E) | 1997.0742                       | 114.0605                   | 8.3                         | 81308.4/6.08       | HUMAN   | P33993      | DNA replication licensing factor MCM7 OS=Homo sapiens GN=MCM7 PE=1 SV=4 |

Detailed Results

| Rank                                                                                                                                                                                                                                                                                                                                                                                                                                                                                                                                                                                                                                                                                                                                                                                                                                                                                                                                                                                                                                                                                                                                                                                                                                                                                                                                                                                                                                                                                                                                                                                                                                                                                                                                                                                                                                                                                                                                                                                                                                                                                                                                                                                                                                                                                                                                                                                                                                                                                                                       | Score  | SPI (%) | BCS    | # Unmatched ions | Variable sites | Sequence                | MH <sup>+</sup> Calculated (Da) | MH <sup>+</sup> Error (Da) | MH <sup>+</sup> Error (ppm) | Protein MW/pl (Da) | Species | Accession # | MS-Digest Index # | Protein Name                                                            |                    |         |                       |                       |         |         |                       |         |         |                     |          |         |         |         |         |         |         |                       |                       |         |         |                       |         |         |         |          |                         |      |      |      |      |      |      |      |      |      |      |      |      |      |      |       |      |      |      |      |      |      |      |      |      |      |                       |      |      |      |      |      |      |      |      |       |       |       |       |       |       |        |       |       |       |       |       |       |       |       |       |       |       |      |      |      |      |      |      |      |      |       |      |      |       |       |       |      |      |       |      |      |       |       |      |      |      |      |          |    |   |   |    |    |    |   |    |    |    |  |  |  |  |    |    |  |                   |    |  |    |    |    |                     |           |       |       |       |       |     |  |     |      |      |     |       |  |  |  |      |      |  |      |      |  |      |       |       |       |
|----------------------------------------------------------------------------------------------------------------------------------------------------------------------------------------------------------------------------------------------------------------------------------------------------------------------------------------------------------------------------------------------------------------------------------------------------------------------------------------------------------------------------------------------------------------------------------------------------------------------------------------------------------------------------------------------------------------------------------------------------------------------------------------------------------------------------------------------------------------------------------------------------------------------------------------------------------------------------------------------------------------------------------------------------------------------------------------------------------------------------------------------------------------------------------------------------------------------------------------------------------------------------------------------------------------------------------------------------------------------------------------------------------------------------------------------------------------------------------------------------------------------------------------------------------------------------------------------------------------------------------------------------------------------------------------------------------------------------------------------------------------------------------------------------------------------------------------------------------------------------------------------------------------------------------------------------------------------------------------------------------------------------------------------------------------------------------------------------------------------------------------------------------------------------------------------------------------------------------------------------------------------------------------------------------------------------------------------------------------------------------------------------------------------------------------------------------------------------------------------------------------------------|--------|---------|--------|------------------|----------------|-------------------------|---------------------------------|----------------------------|-----------------------------|--------------------|---------|-------------|-------------------|-------------------------------------------------------------------------|--------------------|---------|-----------------------|-----------------------|---------|---------|-----------------------|---------|---------|---------------------|----------|---------|---------|---------|---------|---------|---------|-----------------------|-----------------------|---------|---------|-----------------------|---------|---------|---------|----------|-------------------------|------|------|------|------|------|------|------|------|------|------|------|------|------|------|-------|------|------|------|------|------|------|------|------|------|------|-----------------------|------|------|------|------|------|------|------|------|-------|-------|-------|-------|-------|-------|--------|-------|-------|-------|-------|-------|-------|-------|-------|-------|-------|-------|------|------|------|------|------|------|------|------|-------|------|------|-------|-------|-------|------|------|-------|------|------|-------|-------|------|------|------|------|----------|----|---|---|----|----|----|---|----|----|----|--|--|--|--|----|----|--|-------------------|----|--|----|----|----|---------------------|-----------|-------|-------|-------|-------|-----|--|-----|------|------|-----|-------|--|--|--|------|------|--|------|------|--|------|-------|-------|-------|
| 1                                                                                                                                                                                                                                                                                                                                                                                                                                                                                                                                                                                                                                                                                                                                                                                                                                                                                                                                                                                                                                                                                                                                                                                                                                                                                                                                                                                                                                                                                                                                                                                                                                                                                                                                                                                                                                                                                                                                                                                                                                                                                                                                                                                                                                                                                                                                                                                                                                                                                                                          | 12.54  | 67.0    | 6      | 7/25             | K75k           | (R)YAKLFADAVQELLPQYK(E) | 1997.0742                       | 114.0605                   | 8.3                         | 81308.4/6.08       | HUMAN   | P33993      | 381807            | DNA replication licensing factor MCM7 OS=Homo sapiens GN=MCM7 PE=1 SV=4 |                    |         |                       |                       |         |         |                       |         |         |                     |          |         |         |         |         |         |         |                       |                       |         |         |                       |         |         |         |          |                         |      |      |      |      |      |      |      |      |      |      |      |      |      |      |       |      |      |      |      |      |      |      |      |      |      |                       |      |      |      |      |      |      |      |      |       |       |       |       |       |       |        |       |       |       |       |       |       |       |       |       |       |       |      |      |      |      |      |      |      |      |       |      |      |       |       |       |      |      |       |      |      |       |       |      |      |      |      |          |    |   |   |    |    |    |   |    |    |    |  |  |  |  |    |    |  |                   |    |  |    |    |    |                     |           |       |       |       |       |     |  |     |      |      |     |       |  |  |  |      |      |  |      |      |  |      |       |       |       |
| <table border="1"> <thead> <tr> <th>Fragment-ion (m/z)</th> <th>70.064</th> <th>72.080</th> <th>84.043</th> <th>84.078</th> <th>86.097</th> <th>101.069</th> <th>120.082</th> <th>136.080</th> <th>143.120</th> <th>187.072</th> <th>258.106</th> <th>367.276</th> <th>442.222</th> <th>499.282</th> <th>535.285</th> <th>648.391</th> <th>666.332<sup>+2</sup></th> <th>675.837<sup>+2</sup></th> <th>761.464</th> <th>780.403</th> <th>847.438<sup>+2</sup></th> <th>890.492</th> <th>923.448</th> <th>994.470</th> <th>1000.519</th> </tr> </thead> <tbody> <tr> <td>Frac. Inten. (% of TIC)</td> <td>0.01</td> <td>0.22</td> <td>0.14</td> <td>0.23</td> <td>0.45</td> <td>0.11</td> <td>0.18</td> <td>0.14</td> <td>3.91</td> <td>4.97</td> <td>4.05</td> <td>5.85</td> <td>3.58</td> <td>6.97</td> <td>17.52</td> <td>4.70</td> <td>5.28</td> <td>4.83</td> <td>8.29</td> <td>3.68</td> <td>3.69</td> <td>6.93</td> <td>3.78</td> <td>4.43</td> <td>6.08</td> </tr> <tr> <td>Rel. Inten. (% of BP)</td> <td>0.04</td> <td>1.23</td> <td>0.80</td> <td>1.30</td> <td>2.59</td> <td>0.65</td> <td>1.03</td> <td>0.82</td> <td>22.30</td> <td>28.37</td> <td>23.09</td> <td>33.40</td> <td>20.41</td> <td>39.77</td> <td>100.00</td> <td>26.83</td> <td>30.14</td> <td>27.55</td> <td>47.35</td> <td>21.02</td> <td>21.05</td> <td>39.58</td> <td>21.55</td> <td>25.27</td> <td>34.70</td> </tr> <tr> <td>Score</td> <td>0.20</td> <td>0.50</td> <td>1.00</td> <td>0.50</td> <td>0.22</td> <td>1.00</td> <td>1.00</td> <td>1.00</td> <td>-0.22</td> <td>0.75</td> <td>0.75</td> <td>-0.33</td> <td>-0.20</td> <td>-0.40</td> <td>1.50</td> <td>1.50</td> <td>-0.30</td> <td>0.50</td> <td>1.50</td> <td>-0.21</td> <td>-0.21</td> <td>1.50</td> <td>0.50</td> <td>0.50</td> <td>0.50</td> </tr> <tr> <td>Ion-type</td> <td>PR</td> <td>V</td> <td>E</td> <td>KQ</td> <td>LI</td> <td>KQ</td> <td>F</td> <td>a1</td> <td>DA</td> <td>QE</td> <td></td> <td></td> <td></td> <td></td> <td>y4</td> <td>y5</td> <td></td> <td>b11<sup>+2</sup></td> <td>y6</td> <td></td> <td>y7</td> <td>b7</td> <td>b8</td> <td>y8-H<sub>2</sub>O</td> </tr> <tr> <td>Delta ppm</td> <td>-23.2</td> <td>-10.8</td> <td>-16.5</td> <td>-30.6</td> <td>6.7</td> <td></td> <td>6.9</td> <td>26.5</td> <td>1.00</td> <td>0.4</td> <td>-13.7</td> <td></td> <td></td> <td></td> <td>-4.1</td> <td>29.7</td> <td></td> <td>-1.6</td> <td>11.6</td> <td></td> <td>-7.0</td> <td>-16.3</td> <td>-31.0</td> <td>-27.5</td> </tr> </tbody> </table> |        |         |        |                  |                |                         |                                 |                            |                             |                    |         |             |                   |                                                                         | Fragment-ion (m/z) | 70.064  | 72.080                | 84.043                | 84.078  | 86.097  | 101.069               | 120.082 | 136.080 | 143.120             | 187.072  | 258.106 | 367.276 | 442.222 | 499.282 | 535.285 | 648.391 | 666.332 <sup>+2</sup> | 675.837 <sup>+2</sup> | 761.464 | 780.403 | 847.438 <sup>+2</sup> | 890.492 | 923.448 | 994.470 | 1000.519 | Frac. Inten. (% of TIC) | 0.01 | 0.22 | 0.14 | 0.23 | 0.45 | 0.11 | 0.18 | 0.14 | 3.91 | 4.97 | 4.05 | 5.85 | 3.58 | 6.97 | 17.52 | 4.70 | 5.28 | 4.83 | 8.29 | 3.68 | 3.69 | 6.93 | 3.78 | 4.43 | 6.08 | Rel. Inten. (% of BP) | 0.04 | 1.23 | 0.80 | 1.30 | 2.59 | 0.65 | 1.03 | 0.82 | 22.30 | 28.37 | 23.09 | 33.40 | 20.41 | 39.77 | 100.00 | 26.83 | 30.14 | 27.55 | 47.35 | 21.02 | 21.05 | 39.58 | 21.55 | 25.27 | 34.70 | Score | 0.20 | 0.50 | 1.00 | 0.50 | 0.22 | 1.00 | 1.00 | 1.00 | -0.22 | 0.75 | 0.75 | -0.33 | -0.20 | -0.40 | 1.50 | 1.50 | -0.30 | 0.50 | 1.50 | -0.21 | -0.21 | 1.50 | 0.50 | 0.50 | 0.50 | Ion-type | PR | V | E | KQ | LI | KQ | F | a1 | DA | QE |  |  |  |  | y4 | y5 |  | b11 <sup>+2</sup> | y6 |  | y7 | b7 | b8 | y8-H <sub>2</sub> O | Delta ppm | -23.2 | -10.8 | -16.5 | -30.6 | 6.7 |  | 6.9 | 26.5 | 1.00 | 0.4 | -13.7 |  |  |  | -4.1 | 29.7 |  | -1.6 | 11.6 |  | -7.0 | -16.3 | -31.0 | -27.5 |
| Fragment-ion (m/z)                                                                                                                                                                                                                                                                                                                                                                                                                                                                                                                                                                                                                                                                                                                                                                                                                                                                                                                                                                                                                                                                                                                                                                                                                                                                                                                                                                                                                                                                                                                                                                                                                                                                                                                                                                                                                                                                                                                                                                                                                                                                                                                                                                                                                                                                                                                                                                                                                                                                                                         | 70.064 | 72.080  | 84.043 | 84.078           | 86.097         | 101.069                 | 120.082                         | 136.080                    | 143.120                     | 187.072            | 258.106 | 367.276     | 442.222           | 499.282                                                                 | 535.285            | 648.391 | 666.332 <sup>+2</sup> | 675.837 <sup>+2</sup> | 761.464 | 780.403 | 847.438 <sup>+2</sup> | 890.492 | 923.448 | 994.470             | 1000.519 |         |         |         |         |         |         |                       |                       |         |         |                       |         |         |         |          |                         |      |      |      |      |      |      |      |      |      |      |      |      |      |      |       |      |      |      |      |      |      |      |      |      |      |                       |      |      |      |      |      |      |      |      |       |       |       |       |       |       |        |       |       |       |       |       |       |       |       |       |       |       |      |      |      |      |      |      |      |      |       |      |      |       |       |       |      |      |       |      |      |       |       |      |      |      |      |          |    |   |   |    |    |    |   |    |    |    |  |  |  |  |    |    |  |                   |    |  |    |    |    |                     |           |       |       |       |       |     |  |     |      |      |     |       |  |  |  |      |      |  |      |      |  |      |       |       |       |
| Frac. Inten. (% of TIC)                                                                                                                                                                                                                                                                                                                                                                                                                                                                                                                                                                                                                                                                                                                                                                                                                                                                                                                                                                                                                                                                                                                                                                                                                                                                                                                                                                                                                                                                                                                                                                                                                                                                                                                                                                                                                                                                                                                                                                                                                                                                                                                                                                                                                                                                                                                                                                                                                                                                                                    | 0.01   | 0.22    | 0.14   | 0.23             | 0.45           | 0.11                    | 0.18                            | 0.14                       | 3.91                        | 4.97               | 4.05    | 5.85        | 3.58              | 6.97                                                                    | 17.52              | 4.70    | 5.28                  | 4.83                  | 8.29    | 3.68    | 3.69                  | 6.93    | 3.78    | 4.43                | 6.08     |         |         |         |         |         |         |                       |                       |         |         |                       |         |         |         |          |                         |      |      |      |      |      |      |      |      |      |      |      |      |      |      |       |      |      |      |      |      |      |      |      |      |      |                       |      |      |      |      |      |      |      |      |       |       |       |       |       |       |        |       |       |       |       |       |       |       |       |       |       |       |      |      |      |      |      |      |      |      |       |      |      |       |       |       |      |      |       |      |      |       |       |      |      |      |      |          |    |   |   |    |    |    |   |    |    |    |  |  |  |  |    |    |  |                   |    |  |    |    |    |                     |           |       |       |       |       |     |  |     |      |      |     |       |  |  |  |      |      |  |      |      |  |      |       |       |       |
| Rel. Inten. (% of BP)                                                                                                                                                                                                                                                                                                                                                                                                                                                                                                                                                                                                                                                                                                                                                                                                                                                                                                                                                                                                                                                                                                                                                                                                                                                                                                                                                                                                                                                                                                                                                                                                                                                                                                                                                                                                                                                                                                                                                                                                                                                                                                                                                                                                                                                                                                                                                                                                                                                                                                      | 0.04   | 1.23    | 0.80   | 1.30             | 2.59           | 0.65                    | 1.03                            | 0.82                       | 22.30                       | 28.37              | 23.09   | 33.40       | 20.41             | 39.77                                                                   | 100.00             | 26.83   | 30.14                 | 27.55                 | 47.35   | 21.02   | 21.05                 | 39.58   | 21.55   | 25.27               | 34.70    |         |         |         |         |         |         |                       |                       |         |         |                       |         |         |         |          |                         |      |      |      |      |      |      |      |      |      |      |      |      |      |      |       |      |      |      |      |      |      |      |      |      |      |                       |      |      |      |      |      |      |      |      |       |       |       |       |       |       |        |       |       |       |       |       |       |       |       |       |       |       |      |      |      |      |      |      |      |      |       |      |      |       |       |       |      |      |       |      |      |       |       |      |      |      |      |          |    |   |   |    |    |    |   |    |    |    |  |  |  |  |    |    |  |                   |    |  |    |    |    |                     |           |       |       |       |       |     |  |     |      |      |     |       |  |  |  |      |      |  |      |      |  |      |       |       |       |
| Score                                                                                                                                                                                                                                                                                                                                                                                                                                                                                                                                                                                                                                                                                                                                                                                                                                                                                                                                                                                                                                                                                                                                                                                                                                                                                                                                                                                                                                                                                                                                                                                                                                                                                                                                                                                                                                                                                                                                                                                                                                                                                                                                                                                                                                                                                                                                                                                                                                                                                                                      | 0.20   | 0.50    | 1.00   | 0.50             | 0.22           | 1.00                    | 1.00                            | 1.00                       | -0.22                       | 0.75               | 0.75    | -0.33       | -0.20             | -0.40                                                                   | 1.50               | 1.50    | -0.30                 | 0.50                  | 1.50    | -0.21   | -0.21                 | 1.50    | 0.50    | 0.50                | 0.50     |         |         |         |         |         |         |                       |                       |         |         |                       |         |         |         |          |                         |      |      |      |      |      |      |      |      |      |      |      |      |      |      |       |      |      |      |      |      |      |      |      |      |      |                       |      |      |      |      |      |      |      |      |       |       |       |       |       |       |        |       |       |       |       |       |       |       |       |       |       |       |      |      |      |      |      |      |      |      |       |      |      |       |       |       |      |      |       |      |      |       |       |      |      |      |      |          |    |   |   |    |    |    |   |    |    |    |  |  |  |  |    |    |  |                   |    |  |    |    |    |                     |           |       |       |       |       |     |  |     |      |      |     |       |  |  |  |      |      |  |      |      |  |      |       |       |       |
| Ion-type                                                                                                                                                                                                                                                                                                                                                                                                                                                                                                                                                                                                                                                                                                                                                                                                                                                                                                                                                                                                                                                                                                                                                                                                                                                                                                                                                                                                                                                                                                                                                                                                                                                                                                                                                                                                                                                                                                                                                                                                                                                                                                                                                                                                                                                                                                                                                                                                                                                                                                                   | PR     | V       | E      | KQ               | LI             | KQ                      | F                               | a1                         | DA                          | QE                 |         |             |                   |                                                                         | y4                 | y5      |                       | b11 <sup>+2</sup>     | y6      |         | y7                    | b7      | b8      | y8-H <sub>2</sub> O |          |         |         |         |         |         |         |                       |                       |         |         |                       |         |         |         |          |                         |      |      |      |      |      |      |      |      |      |      |      |      |      |      |       |      |      |      |      |      |      |      |      |      |      |                       |      |      |      |      |      |      |      |      |       |       |       |       |       |       |        |       |       |       |       |       |       |       |       |       |       |       |      |      |      |      |      |      |      |      |       |      |      |       |       |       |      |      |       |      |      |       |       |      |      |      |      |          |    |   |   |    |    |    |   |    |    |    |  |  |  |  |    |    |  |                   |    |  |    |    |    |                     |           |       |       |       |       |     |  |     |      |      |     |       |  |  |  |      |      |  |      |      |  |      |       |       |       |
| Delta ppm                                                                                                                                                                                                                                                                                                                                                                                                                                                                                                                                                                                                                                                                                                                                                                                                                                                                                                                                                                                                                                                                                                                                                                                                                                                                                                                                                                                                                                                                                                                                                                                                                                                                                                                                                                                                                                                                                                                                                                                                                                                                                                                                                                                                                                                                                                                                                                                                                                                                                                                  | -23.2  | -10.8   | -16.5  | -30.6            | 6.7            |                         | 6.9                             | 26.5                       | 1.00                        | 0.4                | -13.7   |             |                   |                                                                         | -4.1               | 29.7    |                       | -1.6                  | 11.6    |         | -7.0                  | -16.3   | -31.0   | -27.5               |          |         |         |         |         |         |         |                       |                       |         |         |                       |         |         |         |          |                         |      |      |      |      |      |      |      |      |      |      |      |      |      |      |       |      |      |      |      |      |      |      |      |      |      |                       |      |      |      |      |      |      |      |      |       |       |       |       |       |       |        |       |       |       |       |       |       |       |       |       |       |       |      |      |      |      |      |      |      |      |       |      |      |       |       |       |      |      |       |      |      |       |       |      |      |      |      |          |    |   |   |    |    |    |   |    |    |    |  |  |  |  |    |    |  |                   |    |  |    |    |    |                     |           |       |       |       |       |     |  |     |      |      |     |       |  |  |  |      |      |  |      |      |  |      |       |       |       |

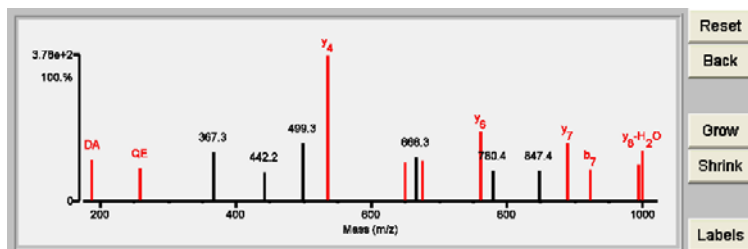

Reset

Back

Grow

Shrink

Labels



Result Summary

| Rank | Score | SPI (%) | BCS | # Unmatched Ions | Variable sites | Sequence                               | MH <sup>+</sup> Calculated (Da) | MH <sup>+</sup> Error (Da) | MH <sup>+</sup> Error (ppm) | Protein MW/PI (Da) | Species | Accession #            | Protein Name                                                             |
|------|-------|---------|-----|------------------|----------------|----------------------------------------|---------------------------------|----------------------------|-----------------------------|--------------------|---------|------------------------|--------------------------------------------------------------------------|
| 1    | 14.63 | 81.0    | 5   | 6/25             | K252k          | (K) <u>LSPkAEVATFFAK</u> (M)           | 1537.8261                       | 114.0582                   | 9.2                         | 90726.2/9.33       | HUMAN   | <a href="#">P11387</a> | DNA topoisomerase 1 OS=Homo sapiens GN=TOP1 PE=1 SV=2                    |
| 2    | 9.14  | 57.5    | 2   | 8/25             | K44k K49k      | (R) <u>LLEPLVTQVTLVNTSNkGPSgk</u> (K)  | 2524.4345                       | 228.0344                   | -18.7                       | 105313.5/5.52      | HUMAN   | <a href="#">P26232</a> | Catenin alpha-2 OS=Homo sapiens GN=CTNNA2 PE=1 SV=5                      |
| 3    | 8.17  | 63.7    | 2   | 8/25             | M560m K555k    | (R) <u>NLAESSGVRGAGSRPkPEAPmAK</u> (G) | 2622.3893                       | 130.0796                   | 15.2                        | 97502.7/9.63       | HUMAN   | <a href="#">Q81Y33</a> | MICAL-like protein 2 OS=Homo sapiens GN=MICAL2 PE=1 SV=1                 |
| 4    | 6.80  | 52.1    | 3   | 9/25             | K71k           | (K) <u>KLEPIWNEVGLEmkSIGSPkVgk</u> (M) | 2638.4637                       | 114.0052                   | -13.7                       | 51872.3/4.80       | HUMAN   | <a href="#">Q96J77</a> | Protein disulfide-isomerase TXNDC10 OS=Homo sapiens GN=TXNDC10 PE=1 SV=2 |
| 5    | 6.42  | 55.5    | 1   | 7/25             | None           | (K) <u>HQMNLLeARSHPMVfELSVpSK</u> (E)  | 2752.4888                       | -0.0199                    | -7.2                        | 115192.6/6.30      | HUMAN   | <a href="#">Q3MIS4</a> | Uncharacterized protein C6orf224 OS=Homo sapiens GN=C6orf224 PE=2 SV=2   |

Detailed Results

| Rank                                                                                                                                                                                                                                                                                                                                                                                                                                                                                                                                                                                                                                                                                                                                                                                                                                                                                                                                                                                                                                                                                                                                                                                                                                                                                                                                                                                                                                                                                                                                                                                                                                                                                                                                                                                                                                                                                                                                                                                                                                                                                                                                                                                                                                                                                                                                                                                                                                                                                             | Score  | SPI (%) | BCS    | # Unmatched Ions | Variable sites | Sequence                            | MH <sup>+</sup> Calculated (Da) | MH <sup>+</sup> Error (Da) | MH <sup>+</sup> Error (ppm) | Protein MW/PI (Da) | Species | Accession #            | MS-Digest Index #      | Protein Name                                          |                    |         |           |         |         |         |         |         |         |           |         |         |         |         |         |         |         |           |         |         |         |         |         |         |           |         |                         |      |      |      |      |       |      |      |      |      |      |      |      |      |      |      |      |      |      |      |      |      |      |      |      |      |                       |      |      |      |      |        |      |      |       |       |       |       |       |       |       |       |       |       |       |       |       |       |       |       |       |       |       |      |      |      |      |      |      |      |      |      |      |      |      |      |      |      |       |       |       |       |      |      |      |      |      |       |          |    |   |   |    |    |   |     |        |    |       |    |    |    |    |    |  |  |  |  |  |    |       |    |       |  |           |       |       |       |     |       |       |       |     |       |       |       |      |       |     |      |  |  |  |  |  |      |     |     |     |  |
|--------------------------------------------------------------------------------------------------------------------------------------------------------------------------------------------------------------------------------------------------------------------------------------------------------------------------------------------------------------------------------------------------------------------------------------------------------------------------------------------------------------------------------------------------------------------------------------------------------------------------------------------------------------------------------------------------------------------------------------------------------------------------------------------------------------------------------------------------------------------------------------------------------------------------------------------------------------------------------------------------------------------------------------------------------------------------------------------------------------------------------------------------------------------------------------------------------------------------------------------------------------------------------------------------------------------------------------------------------------------------------------------------------------------------------------------------------------------------------------------------------------------------------------------------------------------------------------------------------------------------------------------------------------------------------------------------------------------------------------------------------------------------------------------------------------------------------------------------------------------------------------------------------------------------------------------------------------------------------------------------------------------------------------------------------------------------------------------------------------------------------------------------------------------------------------------------------------------------------------------------------------------------------------------------------------------------------------------------------------------------------------------------------------------------------------------------------------------------------------------------|--------|---------|--------|------------------|----------------|-------------------------------------|---------------------------------|----------------------------|-----------------------------|--------------------|---------|------------------------|------------------------|-------------------------------------------------------|--------------------|---------|-----------|---------|---------|---------|---------|---------|---------|-----------|---------|---------|---------|---------|---------|---------|---------|-----------|---------|---------|---------|---------|---------|---------|-----------|---------|-------------------------|------|------|------|------|-------|------|------|------|------|------|------|------|------|------|------|------|------|------|------|------|------|------|------|------|------|-----------------------|------|------|------|------|--------|------|------|-------|-------|-------|-------|-------|-------|-------|-------|-------|-------|-------|-------|-------|-------|-------|-------|-------|-------|-------|------|------|------|------|------|------|------|------|------|------|------|------|------|------|------|-------|-------|-------|-------|------|------|------|------|------|-------|----------|----|---|---|----|----|---|-----|--------|----|-------|----|----|----|----|----|--|--|--|--|--|----|-------|----|-------|--|-----------|-------|-------|-------|-----|-------|-------|-------|-----|-------|-------|-------|------|-------|-----|------|--|--|--|--|--|------|-----|-----|-----|--|
| 1                                                                                                                                                                                                                                                                                                                                                                                                                                                                                                                                                                                                                                                                                                                                                                                                                                                                                                                                                                                                                                                                                                                                                                                                                                                                                                                                                                                                                                                                                                                                                                                                                                                                                                                                                                                                                                                                                                                                                                                                                                                                                                                                                                                                                                                                                                                                                                                                                                                                                                | 14.63  | 81.0    | 5      | 6/25             | K252k          | (K) L S P k A E E V A T F F A K (M) | 1537.8261                       | 114.0582                   | 9.2                         | 90726.2/9.33       | HUMAN   | <a href="#">P11387</a> | <a href="#">394331</a> | DNA topoisomerase 1 OS=Homo sapiens GN=TOP1 PE=1 SV=2 |                    |         |           |         |         |         |         |         |         |           |         |         |         |         |         |         |         |           |         |         |         |         |         |         |           |         |                         |      |      |      |      |       |      |      |      |      |      |      |      |      |      |      |      |      |      |      |      |      |      |      |      |      |                       |      |      |      |      |        |      |      |       |       |       |       |       |       |       |       |       |       |       |       |       |       |       |       |       |       |       |      |      |      |      |      |      |      |      |      |      |      |      |      |      |      |       |       |       |       |      |      |      |      |      |       |          |    |   |   |    |    |   |     |        |    |       |    |    |    |    |    |  |  |  |  |  |    |       |    |       |  |           |       |       |       |     |       |       |       |     |       |       |       |      |       |     |      |  |  |  |  |  |      |     |     |     |  |
| <table border="1"> <thead> <tr> <th>Fragment-ion (m/z)</th> <th>70.064</th> <th>72.080</th> <th>84.043</th> <th>84.081</th> <th>86.095</th> <th>120.079</th> <th>129.099</th> <th>130.087</th> <th>147.111</th> <th>157.095</th> <th>173.127</th> <th>185.093</th> <th>201.122</th> <th>218.150</th> <th>340.196</th> <th>390.188</th> <th>411.229*3</th> <th>511.272</th> <th>520.284</th> <th>607.353</th> <th>613.334</th> <th>669.322</th> <th>684.376</th> <th>726.380*2</th> <th>835.443</th> </tr> </thead> <tbody> <tr> <td>Frac. Inten. (% of TIC)</td> <td>0.01</td> <td>0.56</td> <td>0.10</td> <td>0.44</td> <td>18.60</td> <td>0.30</td> <td>0.15</td> <td>3.39</td> <td>4.41</td> <td>4.26</td> <td>4.54</td> <td>3.01</td> <td>5.52</td> <td>7.77</td> <td>4.93</td> <td>3.07</td> <td>3.45</td> <td>2.97</td> <td>2.96</td> <td>3.20</td> <td>3.71</td> <td>4.51</td> <td>7.53</td> <td>7.28</td> <td>3.33</td> </tr> <tr> <td>Rel. Inten. (% of BP)</td> <td>0.05</td> <td>3.01</td> <td>0.54</td> <td>2.36</td> <td>100.00</td> <td>1.62</td> <td>0.82</td> <td>18.22</td> <td>23.71</td> <td>22.89</td> <td>24.40</td> <td>16.18</td> <td>29.66</td> <td>41.78</td> <td>26.50</td> <td>16.49</td> <td>18.55</td> <td>15.96</td> <td>15.93</td> <td>17.19</td> <td>19.92</td> <td>24.23</td> <td>40.45</td> <td>39.16</td> <td>17.89</td> </tr> <tr> <td>Score</td> <td>0.20</td> <td>0.50</td> <td>1.00</td> <td>0.50</td> <td>0.50</td> <td>1.00</td> <td>0.20</td> <td>0.50</td> <td>1.50</td> <td>0.50</td> <td>0.50</td> <td>0.75</td> <td>0.50</td> <td>1.50</td> <td>0.75</td> <td>-0.16</td> <td>-0.19</td> <td>-0.16</td> <td>-0.17</td> <td>1.50</td> <td>0.75</td> <td>1.50</td> <td>1.50</td> <td>1.50</td> <td>-0.18</td> </tr> <tr> <td>Ion-type</td> <td>PR</td> <td>V</td> <td>E</td> <td>KQ</td> <td>a1</td> <td>F</td> <td>RKQ</td> <td>y1-NH3</td> <td>y1</td> <td>SP-28</td> <td>a2</td> <td>SP</td> <td>b2</td> <td>y2</td> <td>Pk</td> <td></td> <td></td> <td></td> <td></td> <td></td> <td>y5</td> <td>PKAEE</td> <td>y6</td> <td>y12*2</td> <td></td> </tr> <tr> <td>Delta ppm</td> <td>-11.8</td> <td>-13.5</td> <td>-18.9</td> <td>6.2</td> <td>-24.7</td> <td>-15.6</td> <td>-28.2</td> <td>1.9</td> <td>-15.0</td> <td>-23.2</td> <td>-17.0</td> <td>-0.4</td> <td>-11.3</td> <td>1.8</td> <td>-7.7</td> <td></td> <td></td> <td></td> <td></td> <td></td> <td>-1.3</td> <td>0.6</td> <td>6.4</td> <td>0.0</td> <td></td> </tr> </tbody> </table> |        |         |        |                  |                |                                     |                                 |                            |                             |                    |         |                        |                        |                                                       | Fragment-ion (m/z) | 70.064  | 72.080    | 84.043  | 84.081  | 86.095  | 120.079 | 129.099 | 130.087 | 147.111   | 157.095 | 173.127 | 185.093 | 201.122 | 218.150 | 340.196 | 390.188 | 411.229*3 | 511.272 | 520.284 | 607.353 | 613.334 | 669.322 | 684.376 | 726.380*2 | 835.443 | Frac. Inten. (% of TIC) | 0.01 | 0.56 | 0.10 | 0.44 | 18.60 | 0.30 | 0.15 | 3.39 | 4.41 | 4.26 | 4.54 | 3.01 | 5.52 | 7.77 | 4.93 | 3.07 | 3.45 | 2.97 | 2.96 | 3.20 | 3.71 | 4.51 | 7.53 | 7.28 | 3.33 | Rel. Inten. (% of BP) | 0.05 | 3.01 | 0.54 | 2.36 | 100.00 | 1.62 | 0.82 | 18.22 | 23.71 | 22.89 | 24.40 | 16.18 | 29.66 | 41.78 | 26.50 | 16.49 | 18.55 | 15.96 | 15.93 | 17.19 | 19.92 | 24.23 | 40.45 | 39.16 | 17.89 | Score | 0.20 | 0.50 | 1.00 | 0.50 | 0.50 | 1.00 | 0.20 | 0.50 | 1.50 | 0.50 | 0.50 | 0.75 | 0.50 | 1.50 | 0.75 | -0.16 | -0.19 | -0.16 | -0.17 | 1.50 | 0.75 | 1.50 | 1.50 | 1.50 | -0.18 | Ion-type | PR | V | E | KQ | a1 | F | RKQ | y1-NH3 | y1 | SP-28 | a2 | SP | b2 | y2 | Pk |  |  |  |  |  | y5 | PKAEE | y6 | y12*2 |  | Delta ppm | -11.8 | -13.5 | -18.9 | 6.2 | -24.7 | -15.6 | -28.2 | 1.9 | -15.0 | -23.2 | -17.0 | -0.4 | -11.3 | 1.8 | -7.7 |  |  |  |  |  | -1.3 | 0.6 | 6.4 | 0.0 |  |
| Fragment-ion (m/z)                                                                                                                                                                                                                                                                                                                                                                                                                                                                                                                                                                                                                                                                                                                                                                                                                                                                                                                                                                                                                                                                                                                                                                                                                                                                                                                                                                                                                                                                                                                                                                                                                                                                                                                                                                                                                                                                                                                                                                                                                                                                                                                                                                                                                                                                                                                                                                                                                                                                               | 70.064 | 72.080  | 84.043 | 84.081           | 86.095         | 120.079                             | 129.099                         | 130.087                    | 147.111                     | 157.095            | 173.127 | 185.093                | 201.122                | 218.150                                               | 340.196            | 390.188 | 411.229*3 | 511.272 | 520.284 | 607.353 | 613.334 | 669.322 | 684.376 | 726.380*2 | 835.443 |         |         |         |         |         |         |           |         |         |         |         |         |         |           |         |                         |      |      |      |      |       |      |      |      |      |      |      |      |      |      |      |      |      |      |      |      |      |      |      |      |      |                       |      |      |      |      |        |      |      |       |       |       |       |       |       |       |       |       |       |       |       |       |       |       |       |       |       |       |      |      |      |      |      |      |      |      |      |      |      |      |      |      |      |       |       |       |       |      |      |      |      |      |       |          |    |   |   |    |    |   |     |        |    |       |    |    |    |    |    |  |  |  |  |  |    |       |    |       |  |           |       |       |       |     |       |       |       |     |       |       |       |      |       |     |      |  |  |  |  |  |      |     |     |     |  |
| Frac. Inten. (% of TIC)                                                                                                                                                                                                                                                                                                                                                                                                                                                                                                                                                                                                                                                                                                                                                                                                                                                                                                                                                                                                                                                                                                                                                                                                                                                                                                                                                                                                                                                                                                                                                                                                                                                                                                                                                                                                                                                                                                                                                                                                                                                                                                                                                                                                                                                                                                                                                                                                                                                                          | 0.01   | 0.56    | 0.10   | 0.44             | 18.60          | 0.30                                | 0.15                            | 3.39                       | 4.41                        | 4.26               | 4.54    | 3.01                   | 5.52                   | 7.77                                                  | 4.93               | 3.07    | 3.45      | 2.97    | 2.96    | 3.20    | 3.71    | 4.51    | 7.53    | 7.28      | 3.33    |         |         |         |         |         |         |           |         |         |         |         |         |         |           |         |                         |      |      |      |      |       |      |      |      |      |      |      |      |      |      |      |      |      |      |      |      |      |      |      |      |      |                       |      |      |      |      |        |      |      |       |       |       |       |       |       |       |       |       |       |       |       |       |       |       |       |       |       |       |      |      |      |      |      |      |      |      |      |      |      |      |      |      |      |       |       |       |       |      |      |      |      |      |       |          |    |   |   |    |    |   |     |        |    |       |    |    |    |    |    |  |  |  |  |  |    |       |    |       |  |           |       |       |       |     |       |       |       |     |       |       |       |      |       |     |      |  |  |  |  |  |      |     |     |     |  |
| Rel. Inten. (% of BP)                                                                                                                                                                                                                                                                                                                                                                                                                                                                                                                                                                                                                                                                                                                                                                                                                                                                                                                                                                                                                                                                                                                                                                                                                                                                                                                                                                                                                                                                                                                                                                                                                                                                                                                                                                                                                                                                                                                                                                                                                                                                                                                                                                                                                                                                                                                                                                                                                                                                            | 0.05   | 3.01    | 0.54   | 2.36             | 100.00         | 1.62                                | 0.82                            | 18.22                      | 23.71                       | 22.89              | 24.40   | 16.18                  | 29.66                  | 41.78                                                 | 26.50              | 16.49   | 18.55     | 15.96   | 15.93   | 17.19   | 19.92   | 24.23   | 40.45   | 39.16     | 17.89   |         |         |         |         |         |         |           |         |         |         |         |         |         |           |         |                         |      |      |      |      |       |      |      |      |      |      |      |      |      |      |      |      |      |      |      |      |      |      |      |      |      |                       |      |      |      |      |        |      |      |       |       |       |       |       |       |       |       |       |       |       |       |       |       |       |       |       |       |       |      |      |      |      |      |      |      |      |      |      |      |      |      |      |      |       |       |       |       |      |      |      |      |      |       |          |    |   |   |    |    |   |     |        |    |       |    |    |    |    |    |  |  |  |  |  |    |       |    |       |  |           |       |       |       |     |       |       |       |     |       |       |       |      |       |     |      |  |  |  |  |  |      |     |     |     |  |
| Score                                                                                                                                                                                                                                                                                                                                                                                                                                                                                                                                                                                                                                                                                                                                                                                                                                                                                                                                                                                                                                                                                                                                                                                                                                                                                                                                                                                                                                                                                                                                                                                                                                                                                                                                                                                                                                                                                                                                                                                                                                                                                                                                                                                                                                                                                                                                                                                                                                                                                            | 0.20   | 0.50    | 1.00   | 0.50             | 0.50           | 1.00                                | 0.20                            | 0.50                       | 1.50                        | 0.50               | 0.50    | 0.75                   | 0.50                   | 1.50                                                  | 0.75               | -0.16   | -0.19     | -0.16   | -0.17   | 1.50    | 0.75    | 1.50    | 1.50    | 1.50      | -0.18   |         |         |         |         |         |         |           |         |         |         |         |         |         |           |         |                         |      |      |      |      |       |      |      |      |      |      |      |      |      |      |      |      |      |      |      |      |      |      |      |      |      |                       |      |      |      |      |        |      |      |       |       |       |       |       |       |       |       |       |       |       |       |       |       |       |       |       |       |       |      |      |      |      |      |      |      |      |      |      |      |      |      |      |      |       |       |       |       |      |      |      |      |      |       |          |    |   |   |    |    |   |     |        |    |       |    |    |    |    |    |  |  |  |  |  |    |       |    |       |  |           |       |       |       |     |       |       |       |     |       |       |       |      |       |     |      |  |  |  |  |  |      |     |     |     |  |
| Ion-type                                                                                                                                                                                                                                                                                                                                                                                                                                                                                                                                                                                                                                                                                                                                                                                                                                                                                                                                                                                                                                                                                                                                                                                                                                                                                                                                                                                                                                                                                                                                                                                                                                                                                                                                                                                                                                                                                                                                                                                                                                                                                                                                                                                                                                                                                                                                                                                                                                                                                         | PR     | V       | E      | KQ               | a1             | F                                   | RKQ                             | y1-NH3                     | y1                          | SP-28              | a2      | SP                     | b2                     | y2                                                    | Pk                 |         |           |         |         |         | y5      | PKAEE   | y6      | y12*2     |         |         |         |         |         |         |         |           |         |         |         |         |         |         |           |         |                         |      |      |      |      |       |      |      |      |      |      |      |      |      |      |      |      |      |      |      |      |      |      |      |      |      |                       |      |      |      |      |        |      |      |       |       |       |       |       |       |       |       |       |       |       |       |       |       |       |       |       |       |       |      |      |      |      |      |      |      |      |      |      |      |      |      |      |      |       |       |       |       |      |      |      |      |      |       |          |    |   |   |    |    |   |     |        |    |       |    |    |    |    |    |  |  |  |  |  |    |       |    |       |  |           |       |       |       |     |       |       |       |     |       |       |       |      |       |     |      |  |  |  |  |  |      |     |     |     |  |
| Delta ppm                                                                                                                                                                                                                                                                                                                                                                                                                                                                                                                                                                                                                                                                                                                                                                                                                                                                                                                                                                                                                                                                                                                                                                                                                                                                                                                                                                                                                                                                                                                                                                                                                                                                                                                                                                                                                                                                                                                                                                                                                                                                                                                                                                                                                                                                                                                                                                                                                                                                                        | -11.8  | -13.5   | -18.9  | 6.2              | -24.7          | -15.6                               | -28.2                           | 1.9                        | -15.0                       | -23.2              | -17.0   | -0.4                   | -11.3                  | 1.8                                                   | -7.7               |         |           |         |         |         | -1.3    | 0.6     | 6.4     | 0.0       |         |         |         |         |         |         |         |           |         |         |         |         |         |         |           |         |                         |      |      |      |      |       |      |      |      |      |      |      |      |      |      |      |      |      |      |      |      |      |      |      |      |      |                       |      |      |      |      |        |      |      |       |       |       |       |       |       |       |       |       |       |       |       |       |       |       |       |       |       |       |      |      |      |      |      |      |      |      |      |      |      |      |      |      |      |       |       |       |       |      |      |      |      |      |       |          |    |   |   |    |    |   |     |        |    |       |    |    |    |    |    |  |  |  |  |  |    |       |    |       |  |           |       |       |       |     |       |       |       |     |       |       |       |      |       |     |      |  |  |  |  |  |      |     |     |     |  |

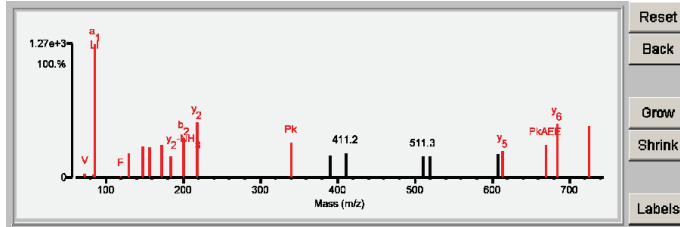

Result Summary

| Rank | Score | SPI (%) | BCS | # Unmatched Ions | Variable sites | Sequence                | MH <sup>+</sup> Calculated (Da) | MH <sup>+</sup> Error (Da) | MH <sup>+</sup> Error (ppm) | Protein MW/pI (Da) | Species | Accession # | Protein Name                                                                         |
|------|-------|---------|-----|------------------|----------------|-------------------------|---------------------------------|----------------------------|-----------------------------|--------------------|---------|-------------|--------------------------------------------------------------------------------------|
| 1    | 22.58 | 93.5    | 8   | 3/25             | K129k          | (R)LLMPSQLVSGVQKELLR(L) | 1911.1096                       | 114.0560                   | 6.4                         | 25370.7/4.87       | HUMAN   | Q9NX09      | DNA-damage-inducible transcript 4 protein OS=Homo sapiens GN=DDIT4 PE=1 SV=1         |
| 2    | 11.77 | 61.1    | 4   | 9/25             | K104k          | (R)LLEKGVQSVLQSPMLLR(A) | 1911.1096                       | 114.0560                   | 6.4                         | 25370.7/4.87       | HUMAN   | RQ9NX09     | REVERSE DNA-damage-inducible transcript 4 protein OS=Homo sapiens GN=DDIT4 PE=1 SV=1 |
| 3    | 6.17  | 64.6    | 2   | 16/25            | K276k          | (K)ILMANKINENLKPERK(E)  | 1911.0844                       | 114.0811                   | 18.9                        | 35583.1/10.00      | HUMAN   | RQ9H7B2     | REVERSE Brix domain-containing protein 1 OS=Homo sapiens GN=BXDC1 PE=1 SV=2          |
| 3    | 6.17  | 64.6    | 2   | 16/25            | K282k          | (K)ILMANKINENLKPERK(E)  | 1911.0844                       | 114.0811                   | 18.9                        | 35583.1/10.00      | HUMAN   | RQ9H7B2     | REVERSE Brix domain-containing protein 1 OS=Homo sapiens GN=BXDC1 PE=1 SV=2          |
| 3    | 6.17  | 64.6    | 2   | 16/25            | K286k          | (K)ILMANKINENLKPERK(E)  | 1911.0844                       | 114.0811                   | 18.9                        | 35583.1/10.00      | HUMAN   | RQ9H7B2     | REVERSE Brix domain-containing protein 1 OS=Homo sapiens GN=BXDC1 PE=1 SV=2          |

Detailed Results

| Rank | Score | SPI (%) | BCS | # Unmatched Ions | Variable sites | Sequence                                  | MH <sup>+</sup> Calculated (Da) | MH <sup>+</sup> Error (Da) | MH <sup>+</sup> Error (ppm) | Protein MW/pI (Da) | Species | Accession # | MS-Digest Index # | Protein Name                                                                 |
|------|-------|---------|-----|------------------|----------------|-------------------------------------------|---------------------------------|----------------------------|-----------------------------|--------------------|---------|-------------|-------------------|------------------------------------------------------------------------------|
| 1    | 22.58 | 93.5    | 8   | 3/25             | K129k          | (R) L L M P S Q L V S G V Q K E L L R (L) | 1911.1096                       | 114.0560                   | 6.4                         | 25370.7/4.87       | HUMAN   | Q9NX09      | 154071            | DNA-damage-inducible transcript 4 protein OS=Homo sapiens GN=DDIT4 PE=1 SV=1 |

  

| Fragment-ion (m/z)     | 70.065 | 72.079 | 86.096         | 101.068 | 104.052        | 175.120        | 199.181        | 200.181        | 216.094              | 227.174 | 288.201        | 295.136 | 313.156 | 415.269 <sup>+2</sup>        | 426.243 | 525.306 | 530.333        | 556.651 <sup>+3</sup>         | 600.334 <sup>+3</sup>         | 829.493        | 834.483 <sup>+2</sup>         | 874.417                       | 899.991 <sup>+2</sup> | 928.561        | 1143.640 |
|------------------------|--------|--------|----------------|---------|----------------|----------------|----------------|----------------|----------------------|---------|----------------|---------|---------|------------------------------|---------|---------|----------------|-------------------------------|-------------------------------|----------------|-------------------------------|-------------------------------|-----------------------|----------------|----------|
| Frac. Inten.(% of TIC) | 0.00   | 0.07   | 12.35          | 0.05    | 2.94           | 1.62           | 11.47          | 2.18           | 1.53                 | 10.93   | 1.75           | 1.76    | 1.66    | 1.68                         | 2.95    | 1.60    | 1.89           | 4.20                          | 5.40                          | 5.04           | 17.84                         | 1.42                          | 3.83                  | 1.71           | 4.14     |
| Rel. Inten.(% of BP)   | 0.01   | 0.40   | 69.25          | 0.26    | 16.50          | 9.08           | 64.32          | 12.23          | 8.57                 | 61.28   | 9.83           | 9.84    | 9.30    | 9.39                         | 16.54   | 8.95    | 10.58          | 23.53                         | 30.27                         | 28.25          | 100.00                        | 7.96                          | 21.49                 | 9.57           | 23.23    |
| Score                  | 0.20   | 0.50   | 0.50           | 0.50    | -0.16          | 1.50           | 0.50           | -0.12          | 0.75                 | 0.75    | 1.50           | 0.50    | 0.75    | 1.50                         | 0.75    | 1.50    | 1.50           | 1.50                          | 1.50                          | 1.50           | 1.50                          | 1.50                          | 1.50                  | 1.50           | 1.50     |
| Ion-type               | PR     | V      | a <sub>1</sub> | QK      | y <sub>1</sub> | a <sub>2</sub> | b <sub>2</sub> | y <sub>2</sub> | PSQ-H <sub>2</sub> O | PSQ     | y <sub>2</sub> | PSQ     | PSQ     | y <sub>6</sub> <sup>+2</sup> | PSQL    | PSQLV   | y <sub>4</sub> | y <sub>14</sub> <sup>+3</sup> | y <sub>15</sub> <sup>+3</sup> | y <sub>6</sub> | y <sub>14</sub> <sup>+2</sup> | y <sub>15</sub> <sup>+2</sup> | y <sub>7</sub>        | y <sub>9</sub> |          |
| Delta ppm              | -1.8   | -30.2  |                | -25.1   |                | 3.7            |                | -5.0           |                      | -9.3    | -7.0           | -18.6   | 14.9    | 26.2                         | 16.6    | 3.4     | 6.5            | -3.1                          | 2.2                           | 4.8            | 9.1                           |                               | -4.9                  | 4.0            | -7.3     |

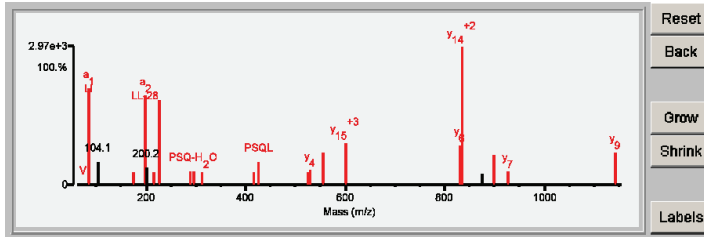

Result Summary

| Rank | Score | SPI (%) | BCS | # Unmatched Ions | Variable sites | Sequence                   | MH <sup>+</sup> Calculated (Da) | MH <sup>+</sup> Error (Da) | MH <sup>+</sup> Error (ppm) | Protein MW/pI (Da) | Species | Accession # | Protein Name                                                                  |
|------|-------|---------|-----|------------------|----------------|----------------------------|---------------------------------|----------------------------|-----------------------------|--------------------|---------|-------------|-------------------------------------------------------------------------------|
| 1    | 18.95 | 87.9    | 10  | 5/25             | K344k          | (K) <u>L</u> SLLEKLLPER(K) | 1310.8042                       | 114.0505                   | 5.3                         | 45610.1/6.65       | HUMAN   | P31689      | DnaJ homolog subfamily A member 1 OS=Homo sapiens GN=DNAJA1 PE=1 SV=2         |
| 2    | 7.68  | 69.0    | 4   | 13/25            | None           | (R)LRGAAERPRRSR(D)         | 1424.8305                       | 0.0242                     | 17.0                        | 103656.7/8.57      | HUMAN   | Q9Y219      | TBC1 domain family member 30 OS=Homo sapiens GN=TBC1D30 PE=2 SV=2             |
| 3    | 6.01  | 63.2    | 3   | 16/25            | None           | (R)LRQLGSPGSLQR(K)         | 1424.8332                       | 0.0215                     | 15.1                        | 178278.3/6.19      | HUMAN   | Q9Y6N6      | Laminin subunit gamma-3 OS=Homo sapiens GN=LAMC3 PE=2 SV=2                    |
| 4    | 5.53  | 63.9    | 2   | 16/25            | None           | (K)LNGVKLWTAGPR(E)         | 1424.8372                       | 0.0175                     | 12.3                        | 49991.9/5.14       | HUMAN   | Q9Y366      | Intracellular transport protein 52 homolog OS=Homo sapiens GN=IFT52 PE=2 SV=3 |
| 5    | 5.05  | 64.2    | 1   | 15/25            | K620k          | (K)LPVADIKAVVTGk(D)        | 1310.8042                       | 114.0505                   | 5.3                         | 84571.6/5.89       | HUMAN   | Q92556      | Engulfment and cell motility protein 1 OS=Homo sapiens GN=ELMO1 PE=1 SV=2     |

Detailed Results

| Rank                                                                                                                                                                                                                                                                                                                                                                                                                                                                                                                                                                                                                                                                                                                                                                                                                                                                                                                                                                                                                                                                                                                                                                                                                                                                                                                                                                                                                                                                                                                                                                                                                                                                                                                                                                                                                                                                                                                                                                                                                                                                                                                                                                                                                                                                                                                                                                                                                                                                                                                                                                                                                                                                                                                                                                                                                                                                                                                                                                                                                                                                                                                                     | Score  | SPI (%) | BCS    | # Unmatched Ions | Variable sites | Sequence                      | MH <sup>+</sup> Calculated (Da) | MH <sup>+</sup> Error (Da) | MH <sup>+</sup> Error (ppm) | Protein MW/pI (Da) | Species | Accession # | MS-Digest Index # | Protein Name                                                          |                    |         |         |                       |         |                  |         |         |                       |         |         |         |         |         |         |         |         |         |                       |         |         |         |         |                       |         |         |                        |      |      |       |      |      |      |      |      |      |      |      |      |      |       |      |      |      |      |      |      |      |      |      |      |      |                      |      |       |       |       |       |       |      |       |      |      |      |      |      |        |      |       |      |      |       |       |      |       |      |      |      |       |      |       |      |      |      |      |      |      |      |      |       |      |      |      |       |       |      |       |      |      |      |      |      |      |      |          |    |  |    |    |    |    |    |        |    |       |  |    |        |    |  |  |     |  |    |    |      |    |                   |    |    |           |      |  |      |      |      |  |     |      |     |       |  |       |      |      |  |  |      |  |     |     |      |     |       |     |      |  |  |  |    |       |  |                  |  |  |  |  |  |  |  |  |  |  |  |  |  |                  |  |  |  |  |  |  |  |  |  |      |  |    |  |  |  |  |  |  |  |  |  |  |  |  |  |      |  |  |  |  |  |
|------------------------------------------------------------------------------------------------------------------------------------------------------------------------------------------------------------------------------------------------------------------------------------------------------------------------------------------------------------------------------------------------------------------------------------------------------------------------------------------------------------------------------------------------------------------------------------------------------------------------------------------------------------------------------------------------------------------------------------------------------------------------------------------------------------------------------------------------------------------------------------------------------------------------------------------------------------------------------------------------------------------------------------------------------------------------------------------------------------------------------------------------------------------------------------------------------------------------------------------------------------------------------------------------------------------------------------------------------------------------------------------------------------------------------------------------------------------------------------------------------------------------------------------------------------------------------------------------------------------------------------------------------------------------------------------------------------------------------------------------------------------------------------------------------------------------------------------------------------------------------------------------------------------------------------------------------------------------------------------------------------------------------------------------------------------------------------------------------------------------------------------------------------------------------------------------------------------------------------------------------------------------------------------------------------------------------------------------------------------------------------------------------------------------------------------------------------------------------------------------------------------------------------------------------------------------------------------------------------------------------------------------------------------------------------------------------------------------------------------------------------------------------------------------------------------------------------------------------------------------------------------------------------------------------------------------------------------------------------------------------------------------------------------------------------------------------------------------------------------------------------------|--------|---------|--------|------------------|----------------|-------------------------------|---------------------------------|----------------------------|-----------------------------|--------------------|---------|-------------|-------------------|-----------------------------------------------------------------------|--------------------|---------|---------|-----------------------|---------|------------------|---------|---------|-----------------------|---------|---------|---------|---------|---------|---------|---------|---------|---------|-----------------------|---------|---------|---------|---------|-----------------------|---------|---------|------------------------|------|------|-------|------|------|------|------|------|------|------|------|------|------|-------|------|------|------|------|------|------|------|------|------|------|------|----------------------|------|-------|-------|-------|-------|-------|------|-------|------|------|------|------|------|--------|------|-------|------|------|-------|-------|------|-------|------|------|------|-------|------|-------|------|------|------|------|------|------|------|------|-------|------|------|------|-------|-------|------|-------|------|------|------|------|------|------|------|----------|----|--|----|----|----|----|----|--------|----|-------|--|----|--------|----|--|--|-----|--|----|----|------|----|-------------------|----|----|-----------|------|--|------|------|------|--|-----|------|-----|-------|--|-------|------|------|--|--|------|--|-----|-----|------|-----|-------|-----|------|--|--|--|----|-------|--|------------------|--|--|--|--|--|--|--|--|--|--|--|--|--|------------------|--|--|--|--|--|--|--|--|--|------|--|----|--|--|--|--|--|--|--|--|--|--|--|--|--|------|--|--|--|--|--|
| 1                                                                                                                                                                                                                                                                                                                                                                                                                                                                                                                                                                                                                                                                                                                                                                                                                                                                                                                                                                                                                                                                                                                                                                                                                                                                                                                                                                                                                                                                                                                                                                                                                                                                                                                                                                                                                                                                                                                                                                                                                                                                                                                                                                                                                                                                                                                                                                                                                                                                                                                                                                                                                                                                                                                                                                                                                                                                                                                                                                                                                                                                                                                                        | 18.95  | 87.9    | 10     | 5/25             | K344k          | (K) L/S/L/L/E/k/L/L/P/E/R (K) | 1310.8042                       | 114.0505                   | 5.3                         | 45610.1/6.65       | HUMAN   | P31689      | 83416             | DnaJ homolog subfamily A member 1 OS=Homo sapiens GN=DNAJA1 PE=1 SV=2 |                    |         |         |                       |         |                  |         |         |                       |         |         |         |         |         |         |         |         |         |                       |         |         |         |         |                       |         |         |                        |      |      |       |      |      |      |      |      |      |      |      |      |      |       |      |      |      |      |      |      |      |      |      |      |      |                      |      |       |       |       |       |       |      |       |      |      |      |      |      |        |      |       |      |      |       |       |      |       |      |      |      |       |      |       |      |      |      |      |      |      |      |      |       |      |      |      |       |       |      |       |      |      |      |      |      |      |      |          |    |  |    |    |    |    |    |        |    |       |  |    |        |    |  |  |     |  |    |    |      |    |                   |    |    |           |      |  |      |      |      |  |     |      |     |       |  |       |      |      |  |  |      |  |     |     |      |     |       |     |      |  |  |  |    |       |  |                  |  |  |  |  |  |  |  |  |  |  |  |  |  |                  |  |  |  |  |  |  |  |  |  |      |  |    |  |  |  |  |  |  |  |  |  |  |  |  |  |      |  |  |  |  |  |
| <table border="1"> <thead> <tr> <th>Fragment-ion (m/z)</th> <th>70.065</th> <th>84.078</th> <th>86.096</th> <th>173.128</th> <th>175.118</th> <th>201.117</th> <th>243.136</th> <th>296.194</th> <th>304.163</th> <th>328.224</th> <th>341.205</th> <th>356.220</th> <th>384.196</th> <th>401.213</th> <th>433.295</th> <th>440.246</th> <th>485.280</th> <th>490.316<sup>+2</sup></th> <th>514.300</th> <th>556.337</th> <th>598.354</th> <th>627.386</th> <th>656.378<sup>+2</sup></th> <th>911.562</th> <th>998.578</th> </tr> </thead> <tbody> <tr> <td>Frac. Inten.(% of TIC)</td> <td>0.00</td> <td>4.54</td> <td>21.04</td> <td>2.93</td> <td>4.17</td> <td>4.63</td> <td>1.36</td> <td>2.48</td> <td>1.61</td> <td>1.27</td> <td>1.35</td> <td>1.42</td> <td>1.46</td> <td>24.39</td> <td>1.61</td> <td>2.72</td> <td>1.75</td> <td>1.87</td> <td>5.82</td> <td>3.08</td> <td>2.09</td> <td>3.56</td> <td>1.39</td> <td>1.67</td> <td>1.79</td> </tr> <tr> <td>Rel. Inten.(% of BP)</td> <td>0.00</td> <td>18.61</td> <td>86.27</td> <td>12.00</td> <td>17.10</td> <td>18.98</td> <td>5.56</td> <td>10.15</td> <td>6.61</td> <td>5.21</td> <td>5.55</td> <td>5.81</td> <td>5.97</td> <td>100.00</td> <td>6.59</td> <td>11.13</td> <td>7.16</td> <td>7.69</td> <td>23.88</td> <td>12.63</td> <td>8.59</td> <td>14.62</td> <td>5.71</td> <td>6.85</td> <td>7.35</td> </tr> <tr> <td>Score</td> <td>0.20</td> <td>-0.19</td> <td>0.50</td> <td>0.50</td> <td>1.50</td> <td>1.50</td> <td>0.75</td> <td>0.25</td> <td>1.50</td> <td>0.50</td> <td>-0.06</td> <td>0.75</td> <td>0.50</td> <td>1.50</td> <td>-0.07</td> <td>-0.11</td> <td>0.75</td> <td>-0.08</td> <td>1.50</td> <td>1.50</td> <td>0.75</td> <td>1.50</td> <td>1.50</td> <td>0.50</td> <td>1.50</td> </tr> <tr> <td>Ion-type</td> <td>PR</td> <td></td> <td>a1</td> <td>a2</td> <td>y1</td> <td>b2</td> <td>LE</td> <td>b3-H2O</td> <td>y2</td> <td>kL-28</td> <td></td> <td>kL</td> <td>y3-NH3</td> <td>y3</td> <td></td> <td></td> <td>EkL</td> <td></td> <td>y4</td> <td>b5</td> <td>EkLL</td> <td>y5</td> <td>y10<sup>+2</sup></td> <td>b7</td> <td>y7</td> </tr> <tr> <td>Delta ppm</td> <td>-7.5</td> <td></td> <td>-7.3</td> <td>-0.3</td> <td>-3.2</td> <td></td> <td>7.3</td> <td>-8.7</td> <td>3.1</td> <td>-32.3</td> <td></td> <td>-24.8</td> <td>22.0</td> <td>-2.8</td> <td></td> <td></td> <td>17.1</td> <td></td> <td>3.0</td> <td>5.2</td> <td>-4.0</td> <td>5.4</td> <td>-10.5</td> <td>6.2</td> <td>15.1</td> </tr> <tr> <td></td> <td></td> <td></td> <td>LI</td> <td>SL-28</td> <td></td> <td>y<sup>++3</sup></td> <td></td> <td>y<sup>++8</sup></td> <td></td> <td></td> <td></td> <td></td> <td></td> </tr> <tr> <td></td> <td></td> <td></td> <td></td> <td>-7.3</td> <td></td> <td>SL</td> <td></td> <td>17.7</td> <td></td> <td></td> <td></td> <td></td> <td></td> </tr> </tbody> </table> |        |         |        |                  |                |                               |                                 |                            |                             |                    |         |             |                   |                                                                       | Fragment-ion (m/z) | 70.065  | 84.078  | 86.096                | 173.128 | 175.118          | 201.117 | 243.136 | 296.194               | 304.163 | 328.224 | 341.205 | 356.220 | 384.196 | 401.213 | 433.295 | 440.246 | 485.280 | 490.316 <sup>+2</sup> | 514.300 | 556.337 | 598.354 | 627.386 | 656.378 <sup>+2</sup> | 911.562 | 998.578 | Frac. Inten.(% of TIC) | 0.00 | 4.54 | 21.04 | 2.93 | 4.17 | 4.63 | 1.36 | 2.48 | 1.61 | 1.27 | 1.35 | 1.42 | 1.46 | 24.39 | 1.61 | 2.72 | 1.75 | 1.87 | 5.82 | 3.08 | 2.09 | 3.56 | 1.39 | 1.67 | 1.79 | Rel. Inten.(% of BP) | 0.00 | 18.61 | 86.27 | 12.00 | 17.10 | 18.98 | 5.56 | 10.15 | 6.61 | 5.21 | 5.55 | 5.81 | 5.97 | 100.00 | 6.59 | 11.13 | 7.16 | 7.69 | 23.88 | 12.63 | 8.59 | 14.62 | 5.71 | 6.85 | 7.35 | Score | 0.20 | -0.19 | 0.50 | 0.50 | 1.50 | 1.50 | 0.75 | 0.25 | 1.50 | 0.50 | -0.06 | 0.75 | 0.50 | 1.50 | -0.07 | -0.11 | 0.75 | -0.08 | 1.50 | 1.50 | 0.75 | 1.50 | 1.50 | 0.50 | 1.50 | Ion-type | PR |  | a1 | a2 | y1 | b2 | LE | b3-H2O | y2 | kL-28 |  | kL | y3-NH3 | y3 |  |  | EkL |  | y4 | b5 | EkLL | y5 | y10 <sup>+2</sup> | b7 | y7 | Delta ppm | -7.5 |  | -7.3 | -0.3 | -3.2 |  | 7.3 | -8.7 | 3.1 | -32.3 |  | -24.8 | 22.0 | -2.8 |  |  | 17.1 |  | 3.0 | 5.2 | -4.0 | 5.4 | -10.5 | 6.2 | 15.1 |  |  |  | LI | SL-28 |  | y <sup>++3</sup> |  |  |  |  |  |  |  |  |  |  |  |  |  | y <sup>++8</sup> |  |  |  |  |  |  |  |  |  | -7.3 |  | SL |  |  |  |  |  |  |  |  |  |  |  |  |  | 17.7 |  |  |  |  |  |
| Fragment-ion (m/z)                                                                                                                                                                                                                                                                                                                                                                                                                                                                                                                                                                                                                                                                                                                                                                                                                                                                                                                                                                                                                                                                                                                                                                                                                                                                                                                                                                                                                                                                                                                                                                                                                                                                                                                                                                                                                                                                                                                                                                                                                                                                                                                                                                                                                                                                                                                                                                                                                                                                                                                                                                                                                                                                                                                                                                                                                                                                                                                                                                                                                                                                                                                       | 70.065 | 84.078  | 86.096 | 173.128          | 175.118        | 201.117                       | 243.136                         | 296.194                    | 304.163                     | 328.224            | 341.205 | 356.220     | 384.196           | 401.213                                                               | 433.295            | 440.246 | 485.280 | 490.316 <sup>+2</sup> | 514.300 | 556.337          | 598.354 | 627.386 | 656.378 <sup>+2</sup> | 911.562 | 998.578 |         |         |         |         |         |         |         |                       |         |         |         |         |                       |         |         |                        |      |      |       |      |      |      |      |      |      |      |      |      |      |       |      |      |      |      |      |      |      |      |      |      |      |                      |      |       |       |       |       |       |      |       |      |      |      |      |      |        |      |       |      |      |       |       |      |       |      |      |      |       |      |       |      |      |      |      |      |      |      |      |       |      |      |      |       |       |      |       |      |      |      |      |      |      |      |          |    |  |    |    |    |    |    |        |    |       |  |    |        |    |  |  |     |  |    |    |      |    |                   |    |    |           |      |  |      |      |      |  |     |      |     |       |  |       |      |      |  |  |      |  |     |     |      |     |       |     |      |  |  |  |    |       |  |                  |  |  |  |  |  |  |  |  |  |  |  |  |  |                  |  |  |  |  |  |  |  |  |  |      |  |    |  |  |  |  |  |  |  |  |  |  |  |  |  |      |  |  |  |  |  |
| Frac. Inten.(% of TIC)                                                                                                                                                                                                                                                                                                                                                                                                                                                                                                                                                                                                                                                                                                                                                                                                                                                                                                                                                                                                                                                                                                                                                                                                                                                                                                                                                                                                                                                                                                                                                                                                                                                                                                                                                                                                                                                                                                                                                                                                                                                                                                                                                                                                                                                                                                                                                                                                                                                                                                                                                                                                                                                                                                                                                                                                                                                                                                                                                                                                                                                                                                                   | 0.00   | 4.54    | 21.04  | 2.93             | 4.17           | 4.63                          | 1.36                            | 2.48                       | 1.61                        | 1.27               | 1.35    | 1.42        | 1.46              | 24.39                                                                 | 1.61               | 2.72    | 1.75    | 1.87                  | 5.82    | 3.08             | 2.09    | 3.56    | 1.39                  | 1.67    | 1.79    |         |         |         |         |         |         |         |                       |         |         |         |         |                       |         |         |                        |      |      |       |      |      |      |      |      |      |      |      |      |      |       |      |      |      |      |      |      |      |      |      |      |      |                      |      |       |       |       |       |       |      |       |      |      |      |      |      |        |      |       |      |      |       |       |      |       |      |      |      |       |      |       |      |      |      |      |      |      |      |      |       |      |      |      |       |       |      |       |      |      |      |      |      |      |      |          |    |  |    |    |    |    |    |        |    |       |  |    |        |    |  |  |     |  |    |    |      |    |                   |    |    |           |      |  |      |      |      |  |     |      |     |       |  |       |      |      |  |  |      |  |     |     |      |     |       |     |      |  |  |  |    |       |  |                  |  |  |  |  |  |  |  |  |  |  |  |  |  |                  |  |  |  |  |  |  |  |  |  |      |  |    |  |  |  |  |  |  |  |  |  |  |  |  |  |      |  |  |  |  |  |
| Rel. Inten.(% of BP)                                                                                                                                                                                                                                                                                                                                                                                                                                                                                                                                                                                                                                                                                                                                                                                                                                                                                                                                                                                                                                                                                                                                                                                                                                                                                                                                                                                                                                                                                                                                                                                                                                                                                                                                                                                                                                                                                                                                                                                                                                                                                                                                                                                                                                                                                                                                                                                                                                                                                                                                                                                                                                                                                                                                                                                                                                                                                                                                                                                                                                                                                                                     | 0.00   | 18.61   | 86.27  | 12.00            | 17.10          | 18.98                         | 5.56                            | 10.15                      | 6.61                        | 5.21               | 5.55    | 5.81        | 5.97              | 100.00                                                                | 6.59               | 11.13   | 7.16    | 7.69                  | 23.88   | 12.63            | 8.59    | 14.62   | 5.71                  | 6.85    | 7.35    |         |         |         |         |         |         |         |                       |         |         |         |         |                       |         |         |                        |      |      |       |      |      |      |      |      |      |      |      |      |      |       |      |      |      |      |      |      |      |      |      |      |      |                      |      |       |       |       |       |       |      |       |      |      |      |      |      |        |      |       |      |      |       |       |      |       |      |      |      |       |      |       |      |      |      |      |      |      |      |      |       |      |      |      |       |       |      |       |      |      |      |      |      |      |      |          |    |  |    |    |    |    |    |        |    |       |  |    |        |    |  |  |     |  |    |    |      |    |                   |    |    |           |      |  |      |      |      |  |     |      |     |       |  |       |      |      |  |  |      |  |     |     |      |     |       |     |      |  |  |  |    |       |  |                  |  |  |  |  |  |  |  |  |  |  |  |  |  |                  |  |  |  |  |  |  |  |  |  |      |  |    |  |  |  |  |  |  |  |  |  |  |  |  |  |      |  |  |  |  |  |
| Score                                                                                                                                                                                                                                                                                                                                                                                                                                                                                                                                                                                                                                                                                                                                                                                                                                                                                                                                                                                                                                                                                                                                                                                                                                                                                                                                                                                                                                                                                                                                                                                                                                                                                                                                                                                                                                                                                                                                                                                                                                                                                                                                                                                                                                                                                                                                                                                                                                                                                                                                                                                                                                                                                                                                                                                                                                                                                                                                                                                                                                                                                                                                    | 0.20   | -0.19   | 0.50   | 0.50             | 1.50           | 1.50                          | 0.75                            | 0.25                       | 1.50                        | 0.50               | -0.06   | 0.75        | 0.50              | 1.50                                                                  | -0.07              | -0.11   | 0.75    | -0.08                 | 1.50    | 1.50             | 0.75    | 1.50    | 1.50                  | 0.50    | 1.50    |         |         |         |         |         |         |         |                       |         |         |         |         |                       |         |         |                        |      |      |       |      |      |      |      |      |      |      |      |      |      |       |      |      |      |      |      |      |      |      |      |      |      |                      |      |       |       |       |       |       |      |       |      |      |      |      |      |        |      |       |      |      |       |       |      |       |      |      |      |       |      |       |      |      |      |      |      |      |      |      |       |      |      |      |       |       |      |       |      |      |      |      |      |      |      |          |    |  |    |    |    |    |    |        |    |       |  |    |        |    |  |  |     |  |    |    |      |    |                   |    |    |           |      |  |      |      |      |  |     |      |     |       |  |       |      |      |  |  |      |  |     |     |      |     |       |     |      |  |  |  |    |       |  |                  |  |  |  |  |  |  |  |  |  |  |  |  |  |                  |  |  |  |  |  |  |  |  |  |      |  |    |  |  |  |  |  |  |  |  |  |  |  |  |  |      |  |  |  |  |  |
| Ion-type                                                                                                                                                                                                                                                                                                                                                                                                                                                                                                                                                                                                                                                                                                                                                                                                                                                                                                                                                                                                                                                                                                                                                                                                                                                                                                                                                                                                                                                                                                                                                                                                                                                                                                                                                                                                                                                                                                                                                                                                                                                                                                                                                                                                                                                                                                                                                                                                                                                                                                                                                                                                                                                                                                                                                                                                                                                                                                                                                                                                                                                                                                                                 | PR     |         | a1     | a2               | y1             | b2                            | LE                              | b3-H2O                     | y2                          | kL-28              |         | kL          | y3-NH3            | y3                                                                    |                    |         | EkL     |                       | y4      | b5               | EkLL    | y5      | y10 <sup>+2</sup>     | b7      | y7      |         |         |         |         |         |         |         |                       |         |         |         |         |                       |         |         |                        |      |      |       |      |      |      |      |      |      |      |      |      |      |       |      |      |      |      |      |      |      |      |      |      |      |                      |      |       |       |       |       |       |      |       |      |      |      |      |      |        |      |       |      |      |       |       |      |       |      |      |      |       |      |       |      |      |      |      |      |      |      |      |       |      |      |      |       |       |      |       |      |      |      |      |      |      |      |          |    |  |    |    |    |    |    |        |    |       |  |    |        |    |  |  |     |  |    |    |      |    |                   |    |    |           |      |  |      |      |      |  |     |      |     |       |  |       |      |      |  |  |      |  |     |     |      |     |       |     |      |  |  |  |    |       |  |                  |  |  |  |  |  |  |  |  |  |  |  |  |  |                  |  |  |  |  |  |  |  |  |  |      |  |    |  |  |  |  |  |  |  |  |  |  |  |  |  |      |  |  |  |  |  |
| Delta ppm                                                                                                                                                                                                                                                                                                                                                                                                                                                                                                                                                                                                                                                                                                                                                                                                                                                                                                                                                                                                                                                                                                                                                                                                                                                                                                                                                                                                                                                                                                                                                                                                                                                                                                                                                                                                                                                                                                                                                                                                                                                                                                                                                                                                                                                                                                                                                                                                                                                                                                                                                                                                                                                                                                                                                                                                                                                                                                                                                                                                                                                                                                                                | -7.5   |         | -7.3   | -0.3             | -3.2           |                               | 7.3                             | -8.7                       | 3.1                         | -32.3              |         | -24.8       | 22.0              | -2.8                                                                  |                    |         | 17.1    |                       | 3.0     | 5.2              | -4.0    | 5.4     | -10.5                 | 6.2     | 15.1    |         |         |         |         |         |         |         |                       |         |         |         |         |                       |         |         |                        |      |      |       |      |      |      |      |      |      |      |      |      |      |       |      |      |      |      |      |      |      |      |      |      |      |                      |      |       |       |       |       |       |      |       |      |      |      |      |      |        |      |       |      |      |       |       |      |       |      |      |      |       |      |       |      |      |      |      |      |      |      |      |       |      |      |      |       |       |      |       |      |      |      |      |      |      |      |          |    |  |    |    |    |    |    |        |    |       |  |    |        |    |  |  |     |  |    |    |      |    |                   |    |    |           |      |  |      |      |      |  |     |      |     |       |  |       |      |      |  |  |      |  |     |     |      |     |       |     |      |  |  |  |    |       |  |                  |  |  |  |  |  |  |  |  |  |  |  |  |  |                  |  |  |  |  |  |  |  |  |  |      |  |    |  |  |  |  |  |  |  |  |  |  |  |  |  |      |  |  |  |  |  |
|                                                                                                                                                                                                                                                                                                                                                                                                                                                                                                                                                                                                                                                                                                                                                                                                                                                                                                                                                                                                                                                                                                                                                                                                                                                                                                                                                                                                                                                                                                                                                                                                                                                                                                                                                                                                                                                                                                                                                                                                                                                                                                                                                                                                                                                                                                                                                                                                                                                                                                                                                                                                                                                                                                                                                                                                                                                                                                                                                                                                                                                                                                                                          |        |         | LI     | SL-28            |                | y <sup>++3</sup>              |                                 |                            |                             |                    |         |             |                   |                                                                       |                    |         |         |                       |         | y <sup>++8</sup> |         |         |                       |         |         |         |         |         |         |         |         |         |                       |         |         |         |         |                       |         |         |                        |      |      |       |      |      |      |      |      |      |      |      |      |      |       |      |      |      |      |      |      |      |      |      |      |      |                      |      |       |       |       |       |       |      |       |      |      |      |      |      |        |      |       |      |      |       |       |      |       |      |      |      |       |      |       |      |      |      |      |      |      |      |      |       |      |      |      |       |       |      |       |      |      |      |      |      |      |      |          |    |  |    |    |    |    |    |        |    |       |  |    |        |    |  |  |     |  |    |    |      |    |                   |    |    |           |      |  |      |      |      |  |     |      |     |       |  |       |      |      |  |  |      |  |     |     |      |     |       |     |      |  |  |  |    |       |  |                  |  |  |  |  |  |  |  |  |  |  |  |  |  |                  |  |  |  |  |  |  |  |  |  |      |  |    |  |  |  |  |  |  |  |  |  |  |  |  |  |      |  |  |  |  |  |
|                                                                                                                                                                                                                                                                                                                                                                                                                                                                                                                                                                                                                                                                                                                                                                                                                                                                                                                                                                                                                                                                                                                                                                                                                                                                                                                                                                                                                                                                                                                                                                                                                                                                                                                                                                                                                                                                                                                                                                                                                                                                                                                                                                                                                                                                                                                                                                                                                                                                                                                                                                                                                                                                                                                                                                                                                                                                                                                                                                                                                                                                                                                                          |        |         |        | -7.3             |                | SL                            |                                 |                            |                             |                    |         |             |                   |                                                                       |                    |         |         |                       |         | 17.7             |         |         |                       |         |         |         |         |         |         |         |         |         |                       |         |         |         |         |                       |         |         |                        |      |      |       |      |      |      |      |      |      |      |      |      |      |       |      |      |      |      |      |      |      |      |      |      |      |                      |      |       |       |       |       |       |      |       |      |      |      |      |      |        |      |       |      |      |       |       |      |       |      |      |      |       |      |       |      |      |      |      |      |      |      |      |       |      |      |      |       |       |      |       |      |      |      |      |      |      |      |          |    |  |    |    |    |    |    |        |    |       |  |    |        |    |  |  |     |  |    |    |      |    |                   |    |    |           |      |  |      |      |      |  |     |      |     |       |  |       |      |      |  |  |      |  |     |     |      |     |       |     |      |  |  |  |    |       |  |                  |  |  |  |  |  |  |  |  |  |  |  |  |  |                  |  |  |  |  |  |  |  |  |  |      |  |    |  |  |  |  |  |  |  |  |  |  |  |  |  |      |  |  |  |  |  |

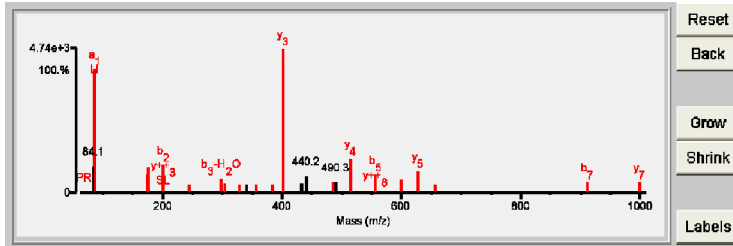

Reset  
Back  
Grow  
Shrink  
Labels

Result Summary

| Rank | Score | SPI (%) | BCS | # Unmatched Ions | Variable sites | Sequence                 | MH <sup>+</sup> Calculated (Da) | MH <sup>+</sup> Error (Da) | MH <sup>+</sup> Error (ppm) | Protein MW pI (Da) | Species | Accession # | Protein Name                                                                                                  |
|------|-------|---------|-----|------------------|----------------|--------------------------|---------------------------------|----------------------------|-----------------------------|--------------------|---------|-------------|---------------------------------------------------------------------------------------------------------------|
| 1    | 17.18 | 77.9    | 11  | 10/25            | K82k           | (R)IQINPQNKADFQGISPER(A) | 2055.0618                       | 114.0624                   | 9.0                         | 12496.8/6.52       | HUMAN   | P61803      | Dolichyl-diphosphooligosaccharide--protein glycosyltransferase subunit DAD1 OS=Homo sapiens GN=DAD1 PE=1 SV=3 |

Detailed Results

| Rank | Score | SPI (%) | BCS | # Unmatched Ions | Variable sites | Sequence                 | MH <sup>+</sup> Calculated (Da) | MH <sup>+</sup> Error (Da) | MH <sup>+</sup> Error (ppm) | Protein MW pI (Da) | Species | Accession # | MS-Digest Index # | Protein Name                                                                                                  |
|------|-------|---------|-----|------------------|----------------|--------------------------|---------------------------------|----------------------------|-----------------------------|--------------------|---------|-------------|-------------------|---------------------------------------------------------------------------------------------------------------|
| 1    | 17.18 | 77.9    | 11  | 10/25            | K82k           | (R)IQINPQNKADFQGISPER(A) | 2055.0618                       | 114.0624                   | 9.0                         | 12496.8/6.52       | HUMAN   | P61803      | 144453            | Dolichyl-diphosphooligosaccharide--protein glycosyltransferase subunit DAD1 OS=Homo sapiens GN=DAD1 PE=1 SV=3 |

  

| Fragment-Ion (m/z)     | 86.097         | 116.071 | 131.117        | 175.120 | 199.179 | 225.119                         | 242.148        | 355.230        | 401.228        | 488.245        | 529.208 | 601.320        | 608.818 | 658.350        | 680.049 | 706.726 | 786.413        | 794.889 | 842.944 <sup>+2</sup> | 850.924 <sup>+2</sup>         | 884.419 | 907.954 <sup>+2</sup>         | 964.520 <sup>+2</sup>         | 1048.507       | 1119.579        |
|------------------------|----------------|---------|----------------|---------|---------|---------------------------------|----------------|----------------|----------------|----------------|---------|----------------|---------|----------------|---------|---------|----------------|---------|-----------------------|-------------------------------|---------|-------------------------------|-------------------------------|----------------|-----------------|
| Frac. Inten (% of TIC) | 10.99          | 1.90    | 2.74           | 2.35    | 1.97    | 4.22                            | 9.94           | 5.66           | 2.29           | 1.83           | 1.77    | 2.95           | 2.88    | 6.16           | 2.63    | 2.21    | 2.19           | 2.02    | 2.06                  | 16.73                         | 2.02    | 3.31                          | 4.36                          | 3.02           | 1.91            |
| Rel. Inten (% of BP)   | 65.70          | 10.78   | 16.35          | 14.04   | 11.76   | 25.24                           | 59.40          | 33.81          | 13.71          | 10.96          | 10.60   | 17.61          | 17.21   | 36.79          | 15.73   | 13.22   | 13.10          | 12.05   | 12.31                 | 100.00                        | 12.06   | 19.76                         | 26.04                         | 18.07          | 11.42           |
| Score                  | 0.50           | -0.11   | -0.16          | 1.50    | -0.12   | 0.25                            | 0.75           | 0.50           | 1.50           | 1.50           | -0.11   | 1.50           | -0.17   | 1.50           | -0.16   | -0.13   | 1.50           | -0.12   | -0.12                 | 1.50                          | -0.12   | 1.50                          | 1.50                          | 1.50           | 1.50            |
| Ion-type               | a <sub>1</sub> |         | y <sub>1</sub> |         |         | b <sub>2</sub> -NH <sub>3</sub> | b <sub>2</sub> | b <sub>3</sub> | y <sub>3</sub> | y <sub>4</sub> |         | y <sub>5</sub> |         | y <sub>6</sub> |         |         | y <sub>7</sub> |         |                       | y <sub>14</sub> <sup>+2</sup> |         | y <sub>15</sub> <sup>+2</sup> | y <sub>16</sub> <sup>+2</sup> | y <sub>9</sub> | y <sub>10</sub> |
| Delta ppm              | -9.6           | 0.50    | LI             | 4.3     |         | -24.3                           | -11.2          | QI             | -13.7          | 34.4           | -2.9    | -16.8          |         | -2.2           |         |         | 3.4            |         |                       | 3.6                           |         | 12.1                          | 36.5                          | 1.6            | 32.4            |

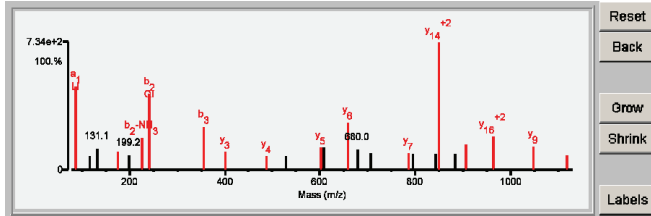

Result Summary

| Rank | Score | SPI (%) | BCS | # Unmatched Ions | Variable sites | Sequence                | MH <sup>+</sup> Calculated (Da) | MH <sup>+</sup> Error (Da) | MH <sup>+</sup> Error (ppm) | Protein MW pI (Da) | Species | Accession # | Protein Name                                                                                                    |
|------|-------|---------|-----|------------------|----------------|-------------------------|---------------------------------|----------------------------|-----------------------------|--------------------|---------|-------------|-----------------------------------------------------------------------------------------------------------------|
| 1    | 17.04 | 66.9    | 9   | 6/25             | K67k           | (R)FLAEEGFYkFHNWFDDR(A) | 2221.0138                       | 114.0632                   | 8.7                         | 80530.1/8.28       | HUMAN   | P46977      | Dolichyl-diphosphooligosaccharide--protein glycosyltransferase subunit STT3A OS=Homo sapiens GN=STT3A PE=1 SV=2 |

Detailed Results

| Rank                                                                                                                                                                                                                                                                                                                                                                                                                                                                                                                                                                                                                                                                                                                                                                                                                                                                                                                                                                                                                                                                                                                                                                                                                                                                                                                                                                                                                                                                                                                                                                                                                                                                                                                                                                                                                                                                                                                                                                                                                                                                                                                                                                                                                                                                                                                                                                                                                                                                                                                                                                                                                  | Score  | SPI (%) | BCS    | # Unmatched Ions | Variable sites | Sequence                                  | MH <sup>+</sup> Calculated (Da) | MH <sup>+</sup> Error (Da) | MH <sup>+</sup> Error (ppm) | Protein MW pI (Da) | Species | Accession # | MS-Digest Index # | Protein Name                                                                                                    |                    |         |                       |                       |                       |                       |                       |         |                       |                       |          |         |         |         |         |         |         |         |                       |                       |                       |                       |         |                       |                       |          |                         |      |      |      |      |      |      |      |      |      |      |      |      |      |      |      |      |      |      |      |      |      |      |      |      |      |                       |      |        |      |      |      |       |       |      |       |       |       |       |       |       |       |       |       |       |       |       |       |       |       |       |       |       |  |       |      |      |      |       |      |       |       |      |      |       |      |      |      |      |      |      |      |      |      |      |       |      |      |          |  |   |  |    |   |   |    |   |  |       |    |  |    |    |    |    |                       |                  |                   |                   |    |  |  |                   |    |           |  |  |      |      |      |      |   |      |  |      |       |      |     |      |       |      |     |      |     |     |  |  |       |      |
|-----------------------------------------------------------------------------------------------------------------------------------------------------------------------------------------------------------------------------------------------------------------------------------------------------------------------------------------------------------------------------------------------------------------------------------------------------------------------------------------------------------------------------------------------------------------------------------------------------------------------------------------------------------------------------------------------------------------------------------------------------------------------------------------------------------------------------------------------------------------------------------------------------------------------------------------------------------------------------------------------------------------------------------------------------------------------------------------------------------------------------------------------------------------------------------------------------------------------------------------------------------------------------------------------------------------------------------------------------------------------------------------------------------------------------------------------------------------------------------------------------------------------------------------------------------------------------------------------------------------------------------------------------------------------------------------------------------------------------------------------------------------------------------------------------------------------------------------------------------------------------------------------------------------------------------------------------------------------------------------------------------------------------------------------------------------------------------------------------------------------------------------------------------------------------------------------------------------------------------------------------------------------------------------------------------------------------------------------------------------------------------------------------------------------------------------------------------------------------------------------------------------------------------------------------------------------------------------------------------------------|--------|---------|--------|------------------|----------------|-------------------------------------------|---------------------------------|----------------------------|-----------------------------|--------------------|---------|-------------|-------------------|-----------------------------------------------------------------------------------------------------------------|--------------------|---------|-----------------------|-----------------------|-----------------------|-----------------------|-----------------------|---------|-----------------------|-----------------------|----------|---------|---------|---------|---------|---------|---------|---------|-----------------------|-----------------------|-----------------------|-----------------------|---------|-----------------------|-----------------------|----------|-------------------------|------|------|------|------|------|------|------|------|------|------|------|------|------|------|------|------|------|------|------|------|------|------|------|------|------|-----------------------|------|--------|------|------|------|-------|-------|------|-------|-------|-------|-------|-------|-------|-------|-------|-------|-------|-------|-------|-------|-------|-------|-------|-------|-------|--|-------|------|------|------|-------|------|-------|-------|------|------|-------|------|------|------|------|------|------|------|------|------|------|-------|------|------|----------|--|---|--|----|---|---|----|---|--|-------|----|--|----|----|----|----|-----------------------|------------------|-------------------|-------------------|----|--|--|-------------------|----|-----------|--|--|------|------|------|------|---|------|--|------|-------|------|-----|------|-------|------|-----|------|-----|-----|--|--|-------|------|
| 1                                                                                                                                                                                                                                                                                                                                                                                                                                                                                                                                                                                                                                                                                                                                                                                                                                                                                                                                                                                                                                                                                                                                                                                                                                                                                                                                                                                                                                                                                                                                                                                                                                                                                                                                                                                                                                                                                                                                                                                                                                                                                                                                                                                                                                                                                                                                                                                                                                                                                                                                                                                                                     | 17.04  | 66.9    | 9      | 6/25             | K67k           | (R) F L A E E G F Y k F H N W F D D R (A) | 2221.0138                       | 114.0632                   | 8.7                         | 80530.1/8.28       | HUMAN   | P46977      | 737579            | Dolichyl-diphosphooligosaccharide--protein glycosyltransferase subunit STT3A OS=Homo sapiens GN=STT3A PE=1 SV=2 |                    |         |                       |                       |                       |                       |                       |         |                       |                       |          |         |         |         |         |         |         |         |                       |                       |                       |                       |         |                       |                       |          |                         |      |      |      |      |      |      |      |      |      |      |      |      |      |      |      |      |      |      |      |      |      |      |      |      |      |                       |      |        |      |      |      |       |       |      |       |       |       |       |       |       |       |       |       |       |       |       |       |       |       |       |       |       |  |       |      |      |      |       |      |       |       |      |      |       |      |      |      |      |      |      |      |      |      |      |       |      |      |          |  |   |  |    |   |   |    |   |  |       |    |  |    |    |    |    |                       |                  |                   |                   |    |  |  |                   |    |           |  |  |      |      |      |      |   |      |  |      |       |      |     |      |       |      |     |      |     |     |  |  |       |      |
| <table border="1"> <thead> <tr> <th>Fragment-Ion (m/z)</th> <th>84.042</th> <th>84.081</th> <th>86.096</th> <th>102.054</th> <th>110.074</th> <th>120.080</th> <th>121.082</th> <th>136.075</th> <th>155.094</th> <th>157.133</th> <th>173.091</th> <th>175.115</th> <th>177.095</th> <th>201.086</th> <th>233.165</th> <th>290.149</th> <th>405.168</th> <th>619.605<sup>+3</sup></th> <th>689.821<sup>+2</sup></th> <th>692.327<sup>+3</sup></th> <th>771.357<sup>+2</sup></th> <th>852.366</th> <th>873.891<sup>+2</sup></th> <th>937.901<sup>+2</sup></th> <th>1136.506</th> </tr> </thead> <tbody> <tr> <td>Frac. Inten. (% of TIC)</td> <td>0.07</td> <td>9.63</td> <td>0.93</td> <td>0.08</td> <td>0.08</td> <td>1.19</td> <td>7.66</td> <td>0.20</td> <td>2.84</td> <td>3.94</td> <td>7.57</td> <td>6.78</td> <td>3.55</td> <td>4.90</td> <td>9.16</td> <td>5.41</td> <td>4.22</td> <td>3.26</td> <td>5.20</td> <td>3.03</td> <td>4.03</td> <td>4.44</td> <td>5.48</td> <td>2.52</td> <td>3.82</td> </tr> <tr> <td>Rel. Inten. (% of BP)</td> <td>0.76</td> <td>100.00</td> <td>9.67</td> <td>0.85</td> <td>0.87</td> <td>12.38</td> <td>79.54</td> <td>2.06</td> <td>29.45</td> <td>40.92</td> <td>78.54</td> <td>70.40</td> <td>36.89</td> <td>50.88</td> <td>95.10</td> <td>56.12</td> <td>43.75</td> <td>33.80</td> <td>53.96</td> <td>31.41</td> <td>41.79</td> <td>46.09</td> <td>56.87</td> <td>26.13</td> <td>39.69</td> </tr> <tr> <td>Score</td> <td></td> <td>-1.00</td> <td>0.22</td> <td>1.00</td> <td>1.00</td> <td>-0.80</td> <td>1.00</td> <td>-0.29</td> <td>-0.41</td> <td>0.50</td> <td>1.50</td> <td>-0.37</td> <td>0.75</td> <td>0.50</td> <td>1.50</td> <td>1.50</td> <td>1.50</td> <td>1.50</td> <td>1.50</td> <td>1.50</td> <td>1.50</td> <td>1.50</td> <td>-0.57</td> <td>1.50</td> <td>1.50</td> </tr> <tr> <td>Ion-type</td> <td></td> <td>E</td> <td></td> <td>LI</td> <td>E</td> <td>H</td> <td>a1</td> <td>Y</td> <td></td> <td>AE-28</td> <td>y1</td> <td></td> <td>AE</td> <td>a2</td> <td>y2</td> <td>y3</td> <td>y13-H2O<sup>+3</sup></td> <td>y9<sup>+2</sup></td> <td>y15<sup>+3</sup></td> <td>y10<sup>+2</sup></td> <td>y6</td> <td></td> <td></td> <td>y13<sup>+2</sup></td> <td>y8</td> </tr> <tr> <td>Delta ppm</td> <td></td> <td></td> <td>-7.3</td> <td>-9.4</td> <td>22.0</td> <td>-5.6</td> <td>F</td> <td>-8.0</td> <td></td> <td>-5.6</td> <td>-23.1</td> <td>-7.4</td> <td>1.1</td> <td>12.4</td> <td>-11.7</td> <td>-6.8</td> <td>3.8</td> <td>29.8</td> <td>9.8</td> <td>2.6</td> <td></td> <td></td> <td>-15.9</td> <td>13.5</td> </tr> </tbody> </table> |        |         |        |                  |                |                                           |                                 |                            |                             |                    |         |             |                   |                                                                                                                 | Fragment-Ion (m/z) | 84.042  | 84.081                | 86.096                | 102.054               | 110.074               | 120.080               | 121.082 | 136.075               | 155.094               | 157.133  | 173.091 | 175.115 | 177.095 | 201.086 | 233.165 | 290.149 | 405.168 | 619.605 <sup>+3</sup> | 689.821 <sup>+2</sup> | 692.327 <sup>+3</sup> | 771.357 <sup>+2</sup> | 852.366 | 873.891 <sup>+2</sup> | 937.901 <sup>+2</sup> | 1136.506 | Frac. Inten. (% of TIC) | 0.07 | 9.63 | 0.93 | 0.08 | 0.08 | 1.19 | 7.66 | 0.20 | 2.84 | 3.94 | 7.57 | 6.78 | 3.55 | 4.90 | 9.16 | 5.41 | 4.22 | 3.26 | 5.20 | 3.03 | 4.03 | 4.44 | 5.48 | 2.52 | 3.82 | Rel. Inten. (% of BP) | 0.76 | 100.00 | 9.67 | 0.85 | 0.87 | 12.38 | 79.54 | 2.06 | 29.45 | 40.92 | 78.54 | 70.40 | 36.89 | 50.88 | 95.10 | 56.12 | 43.75 | 33.80 | 53.96 | 31.41 | 41.79 | 46.09 | 56.87 | 26.13 | 39.69 | Score |  | -1.00 | 0.22 | 1.00 | 1.00 | -0.80 | 1.00 | -0.29 | -0.41 | 0.50 | 1.50 | -0.37 | 0.75 | 0.50 | 1.50 | 1.50 | 1.50 | 1.50 | 1.50 | 1.50 | 1.50 | 1.50 | -0.57 | 1.50 | 1.50 | Ion-type |  | E |  | LI | E | H | a1 | Y |  | AE-28 | y1 |  | AE | a2 | y2 | y3 | y13-H2O <sup>+3</sup> | y9 <sup>+2</sup> | y15 <sup>+3</sup> | y10 <sup>+2</sup> | y6 |  |  | y13 <sup>+2</sup> | y8 | Delta ppm |  |  | -7.3 | -9.4 | 22.0 | -5.6 | F | -8.0 |  | -5.6 | -23.1 | -7.4 | 1.1 | 12.4 | -11.7 | -6.8 | 3.8 | 29.8 | 9.8 | 2.6 |  |  | -15.9 | 13.5 |
| Fragment-Ion (m/z)                                                                                                                                                                                                                                                                                                                                                                                                                                                                                                                                                                                                                                                                                                                                                                                                                                                                                                                                                                                                                                                                                                                                                                                                                                                                                                                                                                                                                                                                                                                                                                                                                                                                                                                                                                                                                                                                                                                                                                                                                                                                                                                                                                                                                                                                                                                                                                                                                                                                                                                                                                                                    | 84.042 | 84.081  | 86.096 | 102.054          | 110.074        | 120.080                                   | 121.082                         | 136.075                    | 155.094                     | 157.133            | 173.091 | 175.115     | 177.095           | 201.086                                                                                                         | 233.165            | 290.149 | 405.168               | 619.605 <sup>+3</sup> | 689.821 <sup>+2</sup> | 692.327 <sup>+3</sup> | 771.357 <sup>+2</sup> | 852.366 | 873.891 <sup>+2</sup> | 937.901 <sup>+2</sup> | 1136.506 |         |         |         |         |         |         |         |                       |                       |                       |                       |         |                       |                       |          |                         |      |      |      |      |      |      |      |      |      |      |      |      |      |      |      |      |      |      |      |      |      |      |      |      |      |                       |      |        |      |      |      |       |       |      |       |       |       |       |       |       |       |       |       |       |       |       |       |       |       |       |       |       |  |       |      |      |      |       |      |       |       |      |      |       |      |      |      |      |      |      |      |      |      |      |       |      |      |          |  |   |  |    |   |   |    |   |  |       |    |  |    |    |    |    |                       |                  |                   |                   |    |  |  |                   |    |           |  |  |      |      |      |      |   |      |  |      |       |      |     |      |       |      |     |      |     |     |  |  |       |      |
| Frac. Inten. (% of TIC)                                                                                                                                                                                                                                                                                                                                                                                                                                                                                                                                                                                                                                                                                                                                                                                                                                                                                                                                                                                                                                                                                                                                                                                                                                                                                                                                                                                                                                                                                                                                                                                                                                                                                                                                                                                                                                                                                                                                                                                                                                                                                                                                                                                                                                                                                                                                                                                                                                                                                                                                                                                               | 0.07   | 9.63    | 0.93   | 0.08             | 0.08           | 1.19                                      | 7.66                            | 0.20                       | 2.84                        | 3.94               | 7.57    | 6.78        | 3.55              | 4.90                                                                                                            | 9.16               | 5.41    | 4.22                  | 3.26                  | 5.20                  | 3.03                  | 4.03                  | 4.44    | 5.48                  | 2.52                  | 3.82     |         |         |         |         |         |         |         |                       |                       |                       |                       |         |                       |                       |          |                         |      |      |      |      |      |      |      |      |      |      |      |      |      |      |      |      |      |      |      |      |      |      |      |      |      |                       |      |        |      |      |      |       |       |      |       |       |       |       |       |       |       |       |       |       |       |       |       |       |       |       |       |       |  |       |      |      |      |       |      |       |       |      |      |       |      |      |      |      |      |      |      |      |      |      |       |      |      |          |  |   |  |    |   |   |    |   |  |       |    |  |    |    |    |    |                       |                  |                   |                   |    |  |  |                   |    |           |  |  |      |      |      |      |   |      |  |      |       |      |     |      |       |      |     |      |     |     |  |  |       |      |
| Rel. Inten. (% of BP)                                                                                                                                                                                                                                                                                                                                                                                                                                                                                                                                                                                                                                                                                                                                                                                                                                                                                                                                                                                                                                                                                                                                                                                                                                                                                                                                                                                                                                                                                                                                                                                                                                                                                                                                                                                                                                                                                                                                                                                                                                                                                                                                                                                                                                                                                                                                                                                                                                                                                                                                                                                                 | 0.76   | 100.00  | 9.67   | 0.85             | 0.87           | 12.38                                     | 79.54                           | 2.06                       | 29.45                       | 40.92              | 78.54   | 70.40       | 36.89             | 50.88                                                                                                           | 95.10              | 56.12   | 43.75                 | 33.80                 | 53.96                 | 31.41                 | 41.79                 | 46.09   | 56.87                 | 26.13                 | 39.69    |         |         |         |         |         |         |         |                       |                       |                       |                       |         |                       |                       |          |                         |      |      |      |      |      |      |      |      |      |      |      |      |      |      |      |      |      |      |      |      |      |      |      |      |      |                       |      |        |      |      |      |       |       |      |       |       |       |       |       |       |       |       |       |       |       |       |       |       |       |       |       |       |  |       |      |      |      |       |      |       |       |      |      |       |      |      |      |      |      |      |      |      |      |      |       |      |      |          |  |   |  |    |   |   |    |   |  |       |    |  |    |    |    |    |                       |                  |                   |                   |    |  |  |                   |    |           |  |  |      |      |      |      |   |      |  |      |       |      |     |      |       |      |     |      |     |     |  |  |       |      |
| Score                                                                                                                                                                                                                                                                                                                                                                                                                                                                                                                                                                                                                                                                                                                                                                                                                                                                                                                                                                                                                                                                                                                                                                                                                                                                                                                                                                                                                                                                                                                                                                                                                                                                                                                                                                                                                                                                                                                                                                                                                                                                                                                                                                                                                                                                                                                                                                                                                                                                                                                                                                                                                 |        | -1.00   | 0.22   | 1.00             | 1.00           | -0.80                                     | 1.00                            | -0.29                      | -0.41                       | 0.50               | 1.50    | -0.37       | 0.75              | 0.50                                                                                                            | 1.50               | 1.50    | 1.50                  | 1.50                  | 1.50                  | 1.50                  | 1.50                  | 1.50    | -0.57                 | 1.50                  | 1.50     |         |         |         |         |         |         |         |                       |                       |                       |                       |         |                       |                       |          |                         |      |      |      |      |      |      |      |      |      |      |      |      |      |      |      |      |      |      |      |      |      |      |      |      |      |                       |      |        |      |      |      |       |       |      |       |       |       |       |       |       |       |       |       |       |       |       |       |       |       |       |       |       |  |       |      |      |      |       |      |       |       |      |      |       |      |      |      |      |      |      |      |      |      |      |       |      |      |          |  |   |  |    |   |   |    |   |  |       |    |  |    |    |    |    |                       |                  |                   |                   |    |  |  |                   |    |           |  |  |      |      |      |      |   |      |  |      |       |      |     |      |       |      |     |      |     |     |  |  |       |      |
| Ion-type                                                                                                                                                                                                                                                                                                                                                                                                                                                                                                                                                                                                                                                                                                                                                                                                                                                                                                                                                                                                                                                                                                                                                                                                                                                                                                                                                                                                                                                                                                                                                                                                                                                                                                                                                                                                                                                                                                                                                                                                                                                                                                                                                                                                                                                                                                                                                                                                                                                                                                                                                                                                              |        | E       |        | LI               | E              | H                                         | a1                              | Y                          |                             | AE-28              | y1      |             | AE                | a2                                                                                                              | y2                 | y3      | y13-H2O <sup>+3</sup> | y9 <sup>+2</sup>      | y15 <sup>+3</sup>     | y10 <sup>+2</sup>     | y6                    |         |                       | y13 <sup>+2</sup>     | y8       |         |         |         |         |         |         |         |                       |                       |                       |                       |         |                       |                       |          |                         |      |      |      |      |      |      |      |      |      |      |      |      |      |      |      |      |      |      |      |      |      |      |      |      |      |                       |      |        |      |      |      |       |       |      |       |       |       |       |       |       |       |       |       |       |       |       |       |       |       |       |       |       |  |       |      |      |      |       |      |       |       |      |      |       |      |      |      |      |      |      |      |      |      |      |       |      |      |          |  |   |  |    |   |   |    |   |  |       |    |  |    |    |    |    |                       |                  |                   |                   |    |  |  |                   |    |           |  |  |      |      |      |      |   |      |  |      |       |      |     |      |       |      |     |      |     |     |  |  |       |      |
| Delta ppm                                                                                                                                                                                                                                                                                                                                                                                                                                                                                                                                                                                                                                                                                                                                                                                                                                                                                                                                                                                                                                                                                                                                                                                                                                                                                                                                                                                                                                                                                                                                                                                                                                                                                                                                                                                                                                                                                                                                                                                                                                                                                                                                                                                                                                                                                                                                                                                                                                                                                                                                                                                                             |        |         | -7.3   | -9.4             | 22.0           | -5.6                                      | F                               | -8.0                       |                             | -5.6               | -23.1   | -7.4        | 1.1               | 12.4                                                                                                            | -11.7              | -6.8    | 3.8                   | 29.8                  | 9.8                   | 2.6                   |                       |         | -15.9                 | 13.5                  |          |         |         |         |         |         |         |         |                       |                       |                       |                       |         |                       |                       |          |                         |      |      |      |      |      |      |      |      |      |      |      |      |      |      |      |      |      |      |      |      |      |      |      |      |      |                       |      |        |      |      |      |       |       |      |       |       |       |       |       |       |       |       |       |       |       |       |       |       |       |       |       |       |  |       |      |      |      |       |      |       |       |      |      |       |      |      |      |      |      |      |      |      |      |      |       |      |      |          |  |   |  |    |   |   |    |   |  |       |    |  |    |    |    |    |                       |                  |                   |                   |    |  |  |                   |    |           |  |  |      |      |      |      |   |      |  |      |       |      |     |      |       |      |     |      |     |     |  |  |       |      |

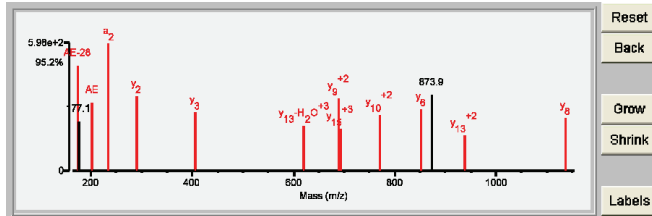

Result Summary

| Rank | Score | SPI (%) | BCS | # Unmatched Ions | Variable sites | Sequence                 | MH <sup>+</sup> Calculated (Da) | MH <sup>+</sup> Error (Da) | MH <sup>+</sup> Error (ppm) | Protein MW/PI (Da) | Species | Accession # | Protein Name                                                           |
|------|-------|---------|-----|------------------|----------------|--------------------------|---------------------------------|----------------------------|-----------------------------|--------------------|---------|-------------|------------------------------------------------------------------------|
| 1    | 15.97 | 69.9    | 10  | 10/25            | K255k          | (R)MAAAGTVSGPSSACKPGR(S) | 1761.8371                       | 114.0539                   | 5.8                         | 289596.3/5.29      | HUMAN   | Q9ULT8      | E3 ubiquitin-protein ligase HECTD1 OS=Homo sapiens GN=HECTD1 PE=1 SV=2 |

Detailed Results

| Rank                                                                                                                                                                                                                                                                                                                                                                                                                                                                                                                                                                                                                                                                                                                                                                                                                                                                                                                                                                                                                                                                                                                                                                                                                                                                                                                                                                                                                                                                                                                                                                                                                                                                                                                                                                                                                                                                                                                                                                                                                                                                                                                                                                                                                                                                                                                                                                                                                                                                                                                                                                                                                                                                                                                                                                                                                                                                                                  | Score  | SPI (%) | BCS     | # Unmatched Ions | Variable sites | Sequence                 | MH <sup>+</sup> Calculated (Da) | MH <sup>+</sup> Error (Da) | MH <sup>+</sup> Error (ppm) | Protein MW/PI (Da) | Species | Accession # | MS-Digest Index # | Protein Name                                                           |                       |         |                    |                       |                       |                       |                       |         |          |          |          |         |         |         |                       |                       |         |         |                       |                       |                       |                       |         |          |          |          |                         |      |      |      |      |      |      |      |      |      |      |      |       |      |      |      |      |      |      |      |      |      |      |      |      |      |                       |       |       |       |       |       |       |       |       |       |       |       |        |       |       |       |       |       |       |       |       |       |       |       |       |       |       |       |      |       |       |       |      |      |       |      |       |       |      |       |      |       |      |      |      |      |      |       |      |      |      |      |          |  |    |  |  |  |    |     |  |    |  |  |    |  |                   |  |    |                    |                   |                   |                   |    |    |     |     |           |  |       |  |  |  |       |       |  |       |  |  |  |  |       |  |       |     |      |      |  |      |       |     |     |     |  |  |  |  |  |  |  |  |  |  |  |  |  |  |  |  |  |  |  |  |     |  |  |  |  |  |
|-------------------------------------------------------------------------------------------------------------------------------------------------------------------------------------------------------------------------------------------------------------------------------------------------------------------------------------------------------------------------------------------------------------------------------------------------------------------------------------------------------------------------------------------------------------------------------------------------------------------------------------------------------------------------------------------------------------------------------------------------------------------------------------------------------------------------------------------------------------------------------------------------------------------------------------------------------------------------------------------------------------------------------------------------------------------------------------------------------------------------------------------------------------------------------------------------------------------------------------------------------------------------------------------------------------------------------------------------------------------------------------------------------------------------------------------------------------------------------------------------------------------------------------------------------------------------------------------------------------------------------------------------------------------------------------------------------------------------------------------------------------------------------------------------------------------------------------------------------------------------------------------------------------------------------------------------------------------------------------------------------------------------------------------------------------------------------------------------------------------------------------------------------------------------------------------------------------------------------------------------------------------------------------------------------------------------------------------------------------------------------------------------------------------------------------------------------------------------------------------------------------------------------------------------------------------------------------------------------------------------------------------------------------------------------------------------------------------------------------------------------------------------------------------------------------------------------------------------------------------------------------------------------|--------|---------|---------|------------------|----------------|--------------------------|---------------------------------|----------------------------|-----------------------------|--------------------|---------|-------------|-------------------|------------------------------------------------------------------------|-----------------------|---------|--------------------|-----------------------|-----------------------|-----------------------|-----------------------|---------|----------|----------|----------|---------|---------|---------|-----------------------|-----------------------|---------|---------|-----------------------|-----------------------|-----------------------|-----------------------|---------|----------|----------|----------|-------------------------|------|------|------|------|------|------|------|------|------|------|------|-------|------|------|------|------|------|------|------|------|------|------|------|------|------|-----------------------|-------|-------|-------|-------|-------|-------|-------|-------|-------|-------|-------|--------|-------|-------|-------|-------|-------|-------|-------|-------|-------|-------|-------|-------|-------|-------|-------|------|-------|-------|-------|------|------|-------|------|-------|-------|------|-------|------|-------|------|------|------|------|------|-------|------|------|------|------|----------|--|----|--|--|--|----|-----|--|----|--|--|----|--|-------------------|--|----|--------------------|-------------------|-------------------|-------------------|----|----|-----|-----|-----------|--|-------|--|--|--|-------|-------|--|-------|--|--|--|--|-------|--|-------|-----|------|------|--|------|-------|-----|-----|-----|--|--|--|--|--|--|--|--|--|--|--|--|--|--|--|--|--|--|--|--|-----|--|--|--|--|--|
| 1                                                                                                                                                                                                                                                                                                                                                                                                                                                                                                                                                                                                                                                                                                                                                                                                                                                                                                                                                                                                                                                                                                                                                                                                                                                                                                                                                                                                                                                                                                                                                                                                                                                                                                                                                                                                                                                                                                                                                                                                                                                                                                                                                                                                                                                                                                                                                                                                                                                                                                                                                                                                                                                                                                                                                                                                                                                                                                     | 15.97  | 69.9    | 10      | 10/25            | K255k          | (R)MAAAGTVSGPSSACKPGR(S) | 1761.8371                       | 114.0539                   | 5.8                         | 289596.3/5.29      | HUMAN   | Q9ULT8      | 277349            | E3 ubiquitin-protein ligase HECTD1 OS=Homo sapiens GN=HECTD1 PE=1 SV=2 |                       |         |                    |                       |                       |                       |                       |         |          |          |          |         |         |         |                       |                       |         |         |                       |                       |                       |                       |         |          |          |          |                         |      |      |      |      |      |      |      |      |      |      |      |       |      |      |      |      |      |      |      |      |      |      |      |      |      |                       |       |       |       |       |       |       |       |       |       |       |       |        |       |       |       |       |       |       |       |       |       |       |       |       |       |       |       |      |       |       |       |      |      |       |      |       |       |      |       |      |       |      |      |      |      |      |       |      |      |      |      |          |  |    |  |  |  |    |     |  |    |  |  |    |  |                   |  |    |                    |                   |                   |                   |    |    |     |     |           |  |       |  |  |  |       |       |  |       |  |  |  |  |       |  |       |     |      |      |  |      |       |     |     |     |  |  |  |  |  |  |  |  |  |  |  |  |  |  |  |  |  |  |  |  |     |  |  |  |  |  |
| <table border="1"> <thead> <tr> <th>Fragment-ion (m/z)</th> <th>84.079</th> <th>104.052</th> <th>173.125</th> <th>175.098</th> <th>176.095</th> <th>203.083</th> <th>214.117</th> <th>269.154</th> <th>274.120</th> <th>288.110</th> <th>296.173</th> <th>329.194</th> <th>364.172</th> <th>565.761<sup>+2</sup></th> <th>609.323<sup>+2</sup></th> <th>731.354</th> <th>737.859</th> <th>766.364<sup>+2</sup></th> <th>801.917<sup>+2</sup></th> <th>837.408<sup>+2</sup></th> <th>838.919<sup>+2</sup></th> <th>976.447</th> <th>1073.526</th> <th>1130.537</th> <th>1217.570</th> </tr> </thead> <tbody> <tr> <td>Frac. Inten. (% of TIC)</td> <td>3.08</td> <td>5.10</td> <td>2.14</td> <td>2.80</td> <td>3.22</td> <td>5.30</td> <td>2.44</td> <td>4.99</td> <td>5.36</td> <td>2.30</td> <td>2.12</td> <td>10.81</td> <td>2.79</td> <td>2.75</td> <td>4.17</td> <td>2.25</td> <td>2.77</td> <td>4.80</td> <td>9.96</td> <td>2.28</td> <td>2.47</td> <td>2.18</td> <td>4.17</td> <td>3.29</td> <td>6.45</td> </tr> <tr> <td>Rel. Inten. (% of BP)</td> <td>28.52</td> <td>47.15</td> <td>19.78</td> <td>25.93</td> <td>29.80</td> <td>49.00</td> <td>22.56</td> <td>46.16</td> <td>49.61</td> <td>21.28</td> <td>19.59</td> <td>100.00</td> <td>25.80</td> <td>25.39</td> <td>38.60</td> <td>20.82</td> <td>25.63</td> <td>44.37</td> <td>92.11</td> <td>21.12</td> <td>22.88</td> <td>20.13</td> <td>38.55</td> <td>30.47</td> <td>59.61</td> </tr> <tr> <td>Score</td> <td>-0.29</td> <td>0.50</td> <td>-0.20</td> <td>-0.26</td> <td>-0.30</td> <td>0.50</td> <td>0.75</td> <td>-0.46</td> <td>0.50</td> <td>-0.21</td> <td>-0.20</td> <td>1.50</td> <td>-0.26</td> <td>1.50</td> <td>-0.39</td> <td>1.50</td> <td>1.50</td> <td>1.50</td> <td>1.50</td> <td>1.50</td> <td>-0.23</td> <td>1.50</td> <td>1.50</td> <td>1.50</td> <td>1.50</td> </tr> <tr> <td>Ion-type</td> <td></td> <td>a1</td> <td></td> <td></td> <td></td> <td>b2</td> <td>AAA</td> <td></td> <td>b3</td> <td></td> <td></td> <td>y3</td> <td></td> <td>y10<sup>+2</sup></td> <td></td> <td>y5</td> <td>y<sup>++</sup>14</td> <td>y15<sup>+2</sup></td> <td>y16<sup>+2</sup></td> <td>a18<sup>+2</sup></td> <td>y8</td> <td>y9</td> <td>y10</td> <td>y11</td> </tr> <tr> <td>Delta ppm</td> <td></td> <td>-18.7</td> <td></td> <td></td> <td></td> <td>-14.6</td> <td>-13.6</td> <td></td> <td>-12.4</td> <td></td> <td></td> <td></td> <td></td> <td>-19.6</td> <td></td> <td>-11.2</td> <td>2.5</td> <td>-4.3</td> <td>38.3</td> <td></td> <td>20.8</td> <td>-16.6</td> <td>9.4</td> <td>0.3</td> <td>0.7</td> </tr> <tr> <td></td> <td>4.1</td> <td></td> <td></td> <td></td> <td></td> <td></td> </tr> </tbody> </table> |        |         |         |                  |                |                          |                                 |                            |                             |                    |         |             |                   |                                                                        | Fragment-ion (m/z)    | 84.079  | 104.052            | 173.125               | 175.098               | 176.095               | 203.083               | 214.117 | 269.154  | 274.120  | 288.110  | 296.173 | 329.194 | 364.172 | 565.761 <sup>+2</sup> | 609.323 <sup>+2</sup> | 731.354 | 737.859 | 766.364 <sup>+2</sup> | 801.917 <sup>+2</sup> | 837.408 <sup>+2</sup> | 838.919 <sup>+2</sup> | 976.447 | 1073.526 | 1130.537 | 1217.570 | Frac. Inten. (% of TIC) | 3.08 | 5.10 | 2.14 | 2.80 | 3.22 | 5.30 | 2.44 | 4.99 | 5.36 | 2.30 | 2.12 | 10.81 | 2.79 | 2.75 | 4.17 | 2.25 | 2.77 | 4.80 | 9.96 | 2.28 | 2.47 | 2.18 | 4.17 | 3.29 | 6.45 | Rel. Inten. (% of BP) | 28.52 | 47.15 | 19.78 | 25.93 | 29.80 | 49.00 | 22.56 | 46.16 | 49.61 | 21.28 | 19.59 | 100.00 | 25.80 | 25.39 | 38.60 | 20.82 | 25.63 | 44.37 | 92.11 | 21.12 | 22.88 | 20.13 | 38.55 | 30.47 | 59.61 | Score | -0.29 | 0.50 | -0.20 | -0.26 | -0.30 | 0.50 | 0.75 | -0.46 | 0.50 | -0.21 | -0.20 | 1.50 | -0.26 | 1.50 | -0.39 | 1.50 | 1.50 | 1.50 | 1.50 | 1.50 | -0.23 | 1.50 | 1.50 | 1.50 | 1.50 | Ion-type |  | a1 |  |  |  | b2 | AAA |  | b3 |  |  | y3 |  | y10 <sup>+2</sup> |  | y5 | y <sup>++</sup> 14 | y15 <sup>+2</sup> | y16 <sup>+2</sup> | a18 <sup>+2</sup> | y8 | y9 | y10 | y11 | Delta ppm |  | -18.7 |  |  |  | -14.6 | -13.6 |  | -12.4 |  |  |  |  | -19.6 |  | -11.2 | 2.5 | -4.3 | 38.3 |  | 20.8 | -16.6 | 9.4 | 0.3 | 0.7 |  |  |  |  |  |  |  |  |  |  |  |  |  |  |  |  |  |  |  |  | 4.1 |  |  |  |  |  |
| Fragment-ion (m/z)                                                                                                                                                                                                                                                                                                                                                                                                                                                                                                                                                                                                                                                                                                                                                                                                                                                                                                                                                                                                                                                                                                                                                                                                                                                                                                                                                                                                                                                                                                                                                                                                                                                                                                                                                                                                                                                                                                                                                                                                                                                                                                                                                                                                                                                                                                                                                                                                                                                                                                                                                                                                                                                                                                                                                                                                                                                                                    | 84.079 | 104.052 | 173.125 | 175.098          | 176.095        | 203.083                  | 214.117                         | 269.154                    | 274.120                     | 288.110            | 296.173 | 329.194     | 364.172           | 565.761 <sup>+2</sup>                                                  | 609.323 <sup>+2</sup> | 731.354 | 737.859            | 766.364 <sup>+2</sup> | 801.917 <sup>+2</sup> | 837.408 <sup>+2</sup> | 838.919 <sup>+2</sup> | 976.447 | 1073.526 | 1130.537 | 1217.570 |         |         |         |                       |                       |         |         |                       |                       |                       |                       |         |          |          |          |                         |      |      |      |      |      |      |      |      |      |      |      |       |      |      |      |      |      |      |      |      |      |      |      |      |      |                       |       |       |       |       |       |       |       |       |       |       |       |        |       |       |       |       |       |       |       |       |       |       |       |       |       |       |       |      |       |       |       |      |      |       |      |       |       |      |       |      |       |      |      |      |      |      |       |      |      |      |      |          |  |    |  |  |  |    |     |  |    |  |  |    |  |                   |  |    |                    |                   |                   |                   |    |    |     |     |           |  |       |  |  |  |       |       |  |       |  |  |  |  |       |  |       |     |      |      |  |      |       |     |     |     |  |  |  |  |  |  |  |  |  |  |  |  |  |  |  |  |  |  |  |  |     |  |  |  |  |  |
| Frac. Inten. (% of TIC)                                                                                                                                                                                                                                                                                                                                                                                                                                                                                                                                                                                                                                                                                                                                                                                                                                                                                                                                                                                                                                                                                                                                                                                                                                                                                                                                                                                                                                                                                                                                                                                                                                                                                                                                                                                                                                                                                                                                                                                                                                                                                                                                                                                                                                                                                                                                                                                                                                                                                                                                                                                                                                                                                                                                                                                                                                                                               | 3.08   | 5.10    | 2.14    | 2.80             | 3.22           | 5.30                     | 2.44                            | 4.99                       | 5.36                        | 2.30               | 2.12    | 10.81       | 2.79              | 2.75                                                                   | 4.17                  | 2.25    | 2.77               | 4.80                  | 9.96                  | 2.28                  | 2.47                  | 2.18    | 4.17     | 3.29     | 6.45     |         |         |         |                       |                       |         |         |                       |                       |                       |                       |         |          |          |          |                         |      |      |      |      |      |      |      |      |      |      |      |       |      |      |      |      |      |      |      |      |      |      |      |      |      |                       |       |       |       |       |       |       |       |       |       |       |       |        |       |       |       |       |       |       |       |       |       |       |       |       |       |       |       |      |       |       |       |      |      |       |      |       |       |      |       |      |       |      |      |      |      |      |       |      |      |      |      |          |  |    |  |  |  |    |     |  |    |  |  |    |  |                   |  |    |                    |                   |                   |                   |    |    |     |     |           |  |       |  |  |  |       |       |  |       |  |  |  |  |       |  |       |     |      |      |  |      |       |     |     |     |  |  |  |  |  |  |  |  |  |  |  |  |  |  |  |  |  |  |  |  |     |  |  |  |  |  |
| Rel. Inten. (% of BP)                                                                                                                                                                                                                                                                                                                                                                                                                                                                                                                                                                                                                                                                                                                                                                                                                                                                                                                                                                                                                                                                                                                                                                                                                                                                                                                                                                                                                                                                                                                                                                                                                                                                                                                                                                                                                                                                                                                                                                                                                                                                                                                                                                                                                                                                                                                                                                                                                                                                                                                                                                                                                                                                                                                                                                                                                                                                                 | 28.52  | 47.15   | 19.78   | 25.93            | 29.80          | 49.00                    | 22.56                           | 46.16                      | 49.61                       | 21.28              | 19.59   | 100.00      | 25.80             | 25.39                                                                  | 38.60                 | 20.82   | 25.63              | 44.37                 | 92.11                 | 21.12                 | 22.88                 | 20.13   | 38.55    | 30.47    | 59.61    |         |         |         |                       |                       |         |         |                       |                       |                       |                       |         |          |          |          |                         |      |      |      |      |      |      |      |      |      |      |      |       |      |      |      |      |      |      |      |      |      |      |      |      |      |                       |       |       |       |       |       |       |       |       |       |       |       |        |       |       |       |       |       |       |       |       |       |       |       |       |       |       |       |      |       |       |       |      |      |       |      |       |       |      |       |      |       |      |      |      |      |      |       |      |      |      |      |          |  |    |  |  |  |    |     |  |    |  |  |    |  |                   |  |    |                    |                   |                   |                   |    |    |     |     |           |  |       |  |  |  |       |       |  |       |  |  |  |  |       |  |       |     |      |      |  |      |       |     |     |     |  |  |  |  |  |  |  |  |  |  |  |  |  |  |  |  |  |  |  |  |     |  |  |  |  |  |
| Score                                                                                                                                                                                                                                                                                                                                                                                                                                                                                                                                                                                                                                                                                                                                                                                                                                                                                                                                                                                                                                                                                                                                                                                                                                                                                                                                                                                                                                                                                                                                                                                                                                                                                                                                                                                                                                                                                                                                                                                                                                                                                                                                                                                                                                                                                                                                                                                                                                                                                                                                                                                                                                                                                                                                                                                                                                                                                                 | -0.29  | 0.50    | -0.20   | -0.26            | -0.30          | 0.50                     | 0.75                            | -0.46                      | 0.50                        | -0.21              | -0.20   | 1.50        | -0.26             | 1.50                                                                   | -0.39                 | 1.50    | 1.50               | 1.50                  | 1.50                  | 1.50                  | -0.23                 | 1.50    | 1.50     | 1.50     | 1.50     |         |         |         |                       |                       |         |         |                       |                       |                       |                       |         |          |          |          |                         |      |      |      |      |      |      |      |      |      |      |      |       |      |      |      |      |      |      |      |      |      |      |      |      |      |                       |       |       |       |       |       |       |       |       |       |       |       |        |       |       |       |       |       |       |       |       |       |       |       |       |       |       |       |      |       |       |       |      |      |       |      |       |       |      |       |      |       |      |      |      |      |      |       |      |      |      |      |          |  |    |  |  |  |    |     |  |    |  |  |    |  |                   |  |    |                    |                   |                   |                   |    |    |     |     |           |  |       |  |  |  |       |       |  |       |  |  |  |  |       |  |       |     |      |      |  |      |       |     |     |     |  |  |  |  |  |  |  |  |  |  |  |  |  |  |  |  |  |  |  |  |     |  |  |  |  |  |
| Ion-type                                                                                                                                                                                                                                                                                                                                                                                                                                                                                                                                                                                                                                                                                                                                                                                                                                                                                                                                                                                                                                                                                                                                                                                                                                                                                                                                                                                                                                                                                                                                                                                                                                                                                                                                                                                                                                                                                                                                                                                                                                                                                                                                                                                                                                                                                                                                                                                                                                                                                                                                                                                                                                                                                                                                                                                                                                                                                              |        | a1      |         |                  |                | b2                       | AAA                             |                            | b3                          |                    |         | y3          |                   | y10 <sup>+2</sup>                                                      |                       | y5      | y <sup>++</sup> 14 | y15 <sup>+2</sup>     | y16 <sup>+2</sup>     | a18 <sup>+2</sup>     | y8                    | y9      | y10      | y11      |          |         |         |         |                       |                       |         |         |                       |                       |                       |                       |         |          |          |          |                         |      |      |      |      |      |      |      |      |      |      |      |       |      |      |      |      |      |      |      |      |      |      |      |      |      |                       |       |       |       |       |       |       |       |       |       |       |       |        |       |       |       |       |       |       |       |       |       |       |       |       |       |       |       |      |       |       |       |      |      |       |      |       |       |      |       |      |       |      |      |      |      |      |       |      |      |      |      |          |  |    |  |  |  |    |     |  |    |  |  |    |  |                   |  |    |                    |                   |                   |                   |    |    |     |     |           |  |       |  |  |  |       |       |  |       |  |  |  |  |       |  |       |     |      |      |  |      |       |     |     |     |  |  |  |  |  |  |  |  |  |  |  |  |  |  |  |  |  |  |  |  |     |  |  |  |  |  |
| Delta ppm                                                                                                                                                                                                                                                                                                                                                                                                                                                                                                                                                                                                                                                                                                                                                                                                                                                                                                                                                                                                                                                                                                                                                                                                                                                                                                                                                                                                                                                                                                                                                                                                                                                                                                                                                                                                                                                                                                                                                                                                                                                                                                                                                                                                                                                                                                                                                                                                                                                                                                                                                                                                                                                                                                                                                                                                                                                                                             |        | -18.7   |         |                  |                | -14.6                    | -13.6                           |                            | -12.4                       |                    |         |             |                   | -19.6                                                                  |                       | -11.2   | 2.5                | -4.3                  | 38.3                  |                       | 20.8                  | -16.6   | 9.4      | 0.3      | 0.7      |         |         |         |                       |                       |         |         |                       |                       |                       |                       |         |          |          |          |                         |      |      |      |      |      |      |      |      |      |      |      |       |      |      |      |      |      |      |      |      |      |      |      |      |      |                       |       |       |       |       |       |       |       |       |       |       |       |        |       |       |       |       |       |       |       |       |       |       |       |       |       |       |       |      |       |       |       |      |      |       |      |       |       |      |       |      |       |      |      |      |      |      |       |      |      |      |      |          |  |    |  |  |  |    |     |  |    |  |  |    |  |                   |  |    |                    |                   |                   |                   |    |    |     |     |           |  |       |  |  |  |       |       |  |       |  |  |  |  |       |  |       |     |      |      |  |      |       |     |     |     |  |  |  |  |  |  |  |  |  |  |  |  |  |  |  |  |  |  |  |  |     |  |  |  |  |  |
|                                                                                                                                                                                                                                                                                                                                                                                                                                                                                                                                                                                                                                                                                                                                                                                                                                                                                                                                                                                                                                                                                                                                                                                                                                                                                                                                                                                                                                                                                                                                                                                                                                                                                                                                                                                                                                                                                                                                                                                                                                                                                                                                                                                                                                                                                                                                                                                                                                                                                                                                                                                                                                                                                                                                                                                                                                                                                                       |        |         |         |                  |                |                          |                                 |                            |                             |                    |         |             |                   |                                                                        |                       |         |                    |                       |                       | 4.1                   |                       |         |          |          |          |         |         |         |                       |                       |         |         |                       |                       |                       |                       |         |          |          |          |                         |      |      |      |      |      |      |      |      |      |      |      |       |      |      |      |      |      |      |      |      |      |      |      |      |      |                       |       |       |       |       |       |       |       |       |       |       |       |        |       |       |       |       |       |       |       |       |       |       |       |       |       |       |       |      |       |       |       |      |      |       |      |       |       |      |       |      |       |      |      |      |      |      |       |      |      |      |      |          |  |    |  |  |  |    |     |  |    |  |  |    |  |                   |  |    |                    |                   |                   |                   |    |    |     |     |           |  |       |  |  |  |       |       |  |       |  |  |  |  |       |  |       |     |      |      |  |      |       |     |     |     |  |  |  |  |  |  |  |  |  |  |  |  |  |  |  |  |  |  |  |  |     |  |  |  |  |  |

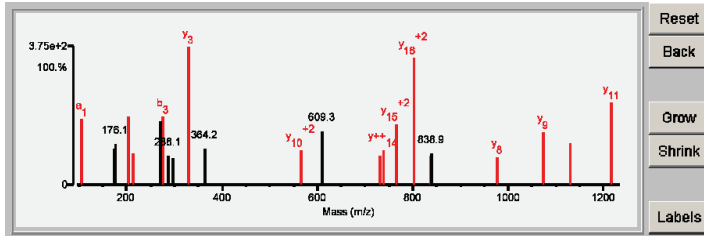

Result Summary

| Rank | Score | SPI (%) | BCS | # Unmatched Ions | Variable sites | Sequence                     | MH <sup>+</sup> Calculated (Da) | MH <sup>+</sup> Error (Da) | MH <sup>+</sup> Error (ppm) | Protein MW/pI (Da) | Species | Accession # | Protein Name                                                         |
|------|-------|---------|-----|------------------|----------------|------------------------------|---------------------------------|----------------------------|-----------------------------|--------------------|---------|-------------|----------------------------------------------------------------------|
| 1    | 21.48 | 92.2    | 11  | 2/25             | K3345k         | (R)HVLDTLIQLAKVFPSSHFTQQR(T) | 2478.3616                       | 114.0586                   | 6.0                         | 481893.3/5.10      | HUMAN   | Q726Z7      | E3 ubiquitin-protein ligase HUWE1 OS=Homo sapiens GN=HUWE1 PE=1 SV=3 |

Detailed Results

| Rank                    | Score  | SPI (%) | BCS     | # Unmatched Ions | Variable sites | Sequence                     | MH <sup>+</sup> Calculated (Da) | MH <sup>+</sup> Error (Da) | MH <sup>+</sup> Error (ppm) | Protein MW/pI (Da) | Species               | Accession #           | MS-Digest Index #     | Protein Name                                                         |         |                       |         |         |         |                       |                       |                       |         |          |          |
|-------------------------|--------|---------|---------|------------------|----------------|------------------------------|---------------------------------|----------------------------|-----------------------------|--------------------|-----------------------|-----------------------|-----------------------|----------------------------------------------------------------------|---------|-----------------------|---------|---------|---------|-----------------------|-----------------------|-----------------------|---------|----------|----------|
| 1                       | 21.48  | 92.2    | 11      | 2/25             | K3345k         | (R)HVLDTLIQLAKVFPSSHFTQQR(T) | 2478.3616                       | 114.0586                   | 6.0                         | 481893.3/5.10      | HUMAN                 | Q726Z7                | 304349                | E3 ubiquitin-protein ligase HUWE1 OS=Homo sapiens GN=HUWE1 PE=1 SV=3 |         |                       |         |         |         |                       |                       |                       |         |          |          |
| Fragment-ion (m/z)      | 84.079 | 86.096  | 101.071 | 110.071          | 120.080        | 209.137                      | 237.135                         | 438.274 <sup>+2</sup>      | 500.753 <sup>+2</sup>       | 566.294            | 574.287 <sup>+2</sup> | 594.983 <sup>+3</sup> | 623.820 <sup>+2</sup> | 661.369                                                              | 679.374 | 744.898 <sup>+2</sup> | 780.405 | 780.914 | 792.464 | 836.948 <sup>+2</sup> | 891.979 <sup>+2</sup> | 900.977 <sup>+2</sup> | 920.525 | 1000.502 | 1147.566 |
| Frac. Inten. (% of TIC) | 0.25   | 0.75    | 0.11    | 0.20             | 0.08           | 3.96                         | 4.17                            | 4.56                       | 4.85                        | 3.29               | 4.92                  | 4.38                  | 2.97                  | 3.51                                                                 | 15.71   | 4.71                  | 6.07    | 3.19    | 3.95    | 5.32                  | 5.43                  | 3.81                  | 2.97    | 6.94     | 3.90     |
| Rel. Inten. (% of BP)   | 1.59   | 4.75    | 0.70    | 1.25             | 0.52           | 25.17                        | 26.54                           | 29.05                      | 30.85                       | 20.97              | 31.32                 | 27.88                 | 18.89                 | 22.37                                                                | 100.00  | 30.00                 | 38.66   | 20.29   | 25.13   | 33.87                 | 34.58                 | 24.25                 | 18.88   | 44.17    | 24.81    |
| Score                   | 0.50   | 0.22    |         | 1.00             | 1.00           | 0.50                         | 0.50                            | -0.29                      | 1.50                        | 0.50               | 1.50                  | 0.50                  | 1.50                  | 0.25                                                                 | 1.50    | 1.50                  | 1.50    | -0.20   | 0.50    | 1.50                  | 1.50                  | 1.50                  | 0.50    | 1.50     | 1.50     |
| Ion-type                | KQ     | LI      | KQ      | a1               | F              | a2                           | b2                              |                            | y6 <sup>+2</sup>            | b5                 | y9 <sup>+2</sup>      | y14-H2O <sup>+3</sup> | y10 <sup>+2</sup>     | b6-H2O                                                               | b6      | y11 <sup>+2</sup>     | y++12   |         | b7      | b14-NH3 <sup>+2</sup> | y14-H2O <sup>+2</sup> | y14 <sup>+2</sup>     | b8      | y8       | y9       |
| Delta ppm               | -16.4  | -9.6    |         | -15.2            | -6.5           | -17.1                        | -2.1                            |                            | 3.6                         | -0.2               | 1.4                   | -3.3                  | 0.5                   | 1.1                                                                  | -6.0    | 11.6                  | -3.5    |         | 1.9     | -32.3                 | 5.6                   | -2.0                  | 4.5     | 6.0      | 1.6      |
|                         |        |         |         | H                |                |                              |                                 |                            |                             |                    |                       |                       |                       |                                                                      | 32.7    |                       |         |         |         | y13 <sup>+2</sup>     |                       |                       |         |          |          |

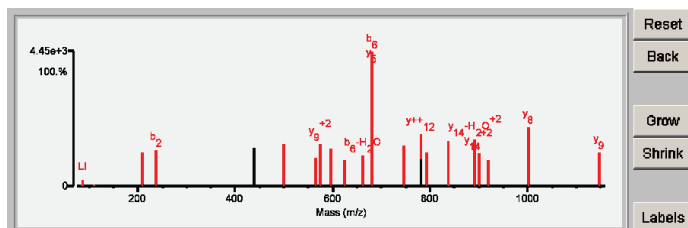

Result Summary

| Rank | Score | SPI (%) | BCS | # Unmatched Ions | Variable sites | Sequence               | MH <sup>+</sup> Calculated (Da) | MH <sup>+</sup> Error (Da) | MH <sup>+</sup> Error (ppm) | Protein MW/pl (Da) | Species | Accession # | Protein Name                                                                |
|------|-------|---------|-----|------------------|----------------|------------------------|---------------------------------|----------------------------|-----------------------------|--------------------|---------|-------------|-----------------------------------------------------------------------------|
| 1    | 15.92 | 76.2    | 8   | 6/25             | K446k          | (K)EFDPLGLPLPPGWEKR(T) | 1737.8959                       | 114.0602                   | 9.3                         | 102803.3/5.94      | HUMAN   | Q96J02      | E3 ubiquitin-protein ligase Itchy homolog OS=Homo sapiens GN=ITCH PE=1 SV=2 |

Detailed Results

| Rank                   | Score | SPI (%) | BCS    | # Unmatched Ions | Variable sites | Sequence               | MH <sup>+</sup> Calculated (Da) | MH <sup>+</sup> Error (Da) | MH <sup>+</sup> Error (ppm) | Protein MW/pl (Da)    | Species | Accession #      | MS-Digest Index #     | Protein Name                                                                |         |         |                       |         |         |         |                       |         |         |         |         |         |
|------------------------|-------|---------|--------|------------------|----------------|------------------------|---------------------------------|----------------------------|-----------------------------|-----------------------|---------|------------------|-----------------------|-----------------------------------------------------------------------------|---------|---------|-----------------------|---------|---------|---------|-----------------------|---------|---------|---------|---------|---------|
| 1                      | 15.92 | 76.2    | 8      | 6/25             | K446k          | (K)EFDPLGLPLPPGWEKR(T) | 1737.8959                       | 114.0602                   | 9.3                         | 102803.3/5.94         | HUMAN   | Q96J02           | 328773                | E3 ubiquitin-protein ligase Itchy homolog OS=Homo sapiens GN=ITCH PE=1 SV=2 |         |         |                       |         |         |         |                       |         |         |         |         |         |
| Fragment-ion (m/z)     |       | 70.064  | 84.081 | 86.096           | 120.079        | 183.145                | 231.112                         | 249.121                    | 374.142                     | 443.735 <sup>+2</sup> | 471.180 | 478.305          | 492.258 <sup>+2</sup> | 507.790                                                                     | 584.272 | 584.369 | 625.821 <sup>+2</sup> | 640.374 | 659.316 | 682.352 | 730.932 <sup>+2</sup> | 756.371 | 788.390 | 869.414 | 886.456 | 983.518 |
| Frac. Inten.(% of TIC) |       | 0.02    | 7.31   | 0.24             | 0.08           | 5.58                   | 3.67                            | 2.76                       | 2.04                        | 5.50                  | 2.57    | 3.83             | 23.68                 | 2.36                                                                        | 2.20    | 2.64    | 2.41                  | 2.24    | 2.38    | 2.85    | 6.35                  | 2.18    | 2.72    | 2.40    | 7.24    | 4.75    |
| Rel. Inten.(% of BP)   |       | 0.08    | 30.87  | 1.03             | 0.36           | 23.57                  | 15.49                           | 11.67                      | 8.62                        | 23.25                 | 10.87   | 16.18            | 100.00                | 9.95                                                                        | 9.31    | 11.13   | 10.16                 | 9.47    | 10.04   | 12.03   | 26.82                 | 9.19    | 11.47   | 10.15   | 30.57   | 20.08   |
| Score                  |       | 0.20    | -0.31  | 0.22             | 1.00           | -0.24                  | -0.15                           | 0.50                       | 0.25                        | 1.50                  | 0.25    | 0.75             | 1.50                  | -0.10                                                                       | 0.25    | -0.11   | 1.50                  | -0.09   | 0.50    | 1.50    | 1.50                  | 38.5    | 17.9    | -34.8   | 1.50    | 1.50    |
| Ion-type               |       | PR      | LI     | LI               | F              |                        | a2                              | b3-H2O                     | y6 <sup>+2</sup>            | b4-H2O                | LGPLP   | y7 <sup>+2</sup> | b5-H2O                | y10 <sup>+2</sup>                                                           | b6      | y11     | y12 <sup>+2</sup>     | b7      | y13     | y14     | y15                   | b16     | y17     | y18     | y19     | y20     |
| Delta ppm              |       | -21.8   |        | -9.6             | -11.5          |                        |                                 | -15.1                      | 16.4                        |                       | 10.8    | -17.2            | 3.6                   |                                                                             |         |         | -23.4                 |         | 17.4    | -36.9   |                       | 17.9    | -34.8   |         | 3.6     | 12.7    |

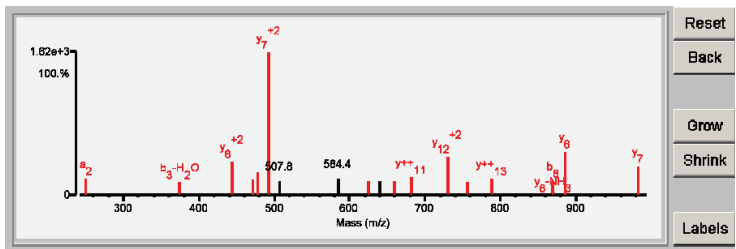

Reset  
Back  
Grow  
Shrink  
Labels



Result Summary

| Rank | Score | SPI (%) | BCS | # Unmatched Ions | Variable sites | Sequence             | MH <sup>+</sup> Calculated (Da) | MH <sup>+</sup> Error (Da) | MH <sup>+</sup> Error (ppm) | Protein MW/pI (Da) | Species | Accession # | Protein Name                                                     |
|------|-------|---------|-----|------------------|----------------|----------------------|---------------------------------|----------------------------|-----------------------------|--------------------|---------|-------------|------------------------------------------------------------------|
| 1    | 16.40 | 63.8    | 7   | 6/25             | K28k           | (K)WGKQDGGEGHVTVR(S) | 1582.7721                       | 114.0489                   | 3.5                         | 110136.6/6.47      | HUMAN   | Q86YT6      | E3 ubiquitin-protein ligase MB1 OS=Homo sapiens GN=MB1 PE=2 SV=1 |

Detailed Results

| Rank | Score | SPI (%) | BCS | # Unmatched Ions | Variable sites | Sequence                             | MH <sup>+</sup> Calculated (Da) | MH <sup>+</sup> Error (Da) | MH <sup>+</sup> Error (ppm) | Protein MW/pI (Da) | Species | Accession # | MS-Digest Index # | Protein Name                                                     |
|------|-------|---------|-----|------------------|----------------|--------------------------------------|---------------------------------|----------------------------|-----------------------------|--------------------|---------|-------------|-------------------|------------------------------------------------------------------|
| 1    | 16.40 | 63.8    | 7   | 6/25             | K28k           | (K)W G k Q/D/G G E/G/H/V/G T V/R (S) | 1582.7721                       | 114.0489                   | 3.5                         | 110136.6/6.47      | HUMAN   | Q86YT6      | 395271            | E3 ubiquitin-protein ligase MB1 OS=Homo sapiens GN=MB1 PE=2 SV=1 |

| Fragment-ion (m/z)      | 72.081 | 84.043 | 84.081 | 87.054 | 88.037 | 101.069 | 110.070 | 115.049 | 129.100 | 130.062 | 132.080 | 141.102 | 142.093 | 159.088 | 167.094 | 170.058 | 175.115 | 195.086 | 227.075 | 334.702          | 432.255 | 484.753 <sup>+2</sup> | 531.326 | 542.275 <sup>+2</sup> | 725.419 |
|-------------------------|--------|--------|--------|--------|--------|---------|---------|---------|---------|---------|---------|---------|---------|---------|---------|---------|---------|---------|---------|------------------|---------|-----------------------|---------|-----------------------|---------|
| Frac. Inten. (% of TIC) | 0.17   | 0.18   | 0.59   | 4.32   | 3.13   | 0.08    | 0.59    | 2.86    | 0.08    | 0.14    | 6.71    | 3.93    | 2.87    | 0.40    | 2.51    | 15.74   | 6.32    | 3.33    | 3.84    | 3.06             | 15.77   | 7.31                  | 11.03   | 2.52                  | 2.51    |
| Rel. Inten. (% of BP)   | 1.07   | 1.17   | 3.77   | 27.43  | 19.86  | 0.49    | 3.73    | 18.15   | 0.50    | 0.90    | 42.53   | 24.93   | 18.19   | 2.56    | 15.94   | 99.79   | 40.06   | 21.14   | 24.35   | 19.41            | 100.00  | 46.39                 | 69.98   | 15.96                 | 15.89   |
| Score                   | 0.50   | 1.00   | 0.50   | 0.50   | -0.20  |         | 1.00    | 0.75    | 0.20    |         | -0.43   | -0.25   | -0.18   |         | 0.50    | -1.00   | 1.50    | 0.75    | 24.35   | 1.50             | 1.50    | 1.50                  | 1.50    | 1.50                  |         |
| Ion-type                | V      | E      | KQ     | NR     |        | KQ      | H       | GG      | RKQ     | W       |         |         |         | a1      | GH-28   |         | y1      | GH      |         | y <sup>++6</sup> | y4      | y10 <sup>+2</sup>     | y5      | y11 <sup>+2</sup>     | y7      |
| Delta ppm               | 4.5    | -16.5  | -0.9   |        | -11.4  | GG-28   | -11.4   |         |         |         |         |         |         | -21.2   | 2.00    | 7.0     | -20.9   | -8.0    | -0.24   | 19.9             | -4.2    | 7.7                   | 1.1     | 24.0                  | 18.5    |

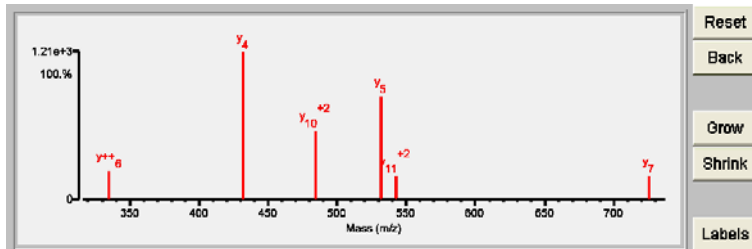

Result Summary

| Rank | Score | SPI (%) | BCS | # Unmatched Ions | Variable sites | Sequence                | MH <sup>+</sup> Calculated (Da) | MH <sup>+</sup> Error (Da) | MH <sup>+</sup> Error (ppm) | Protein MW/pl (Da) | Species | Accession # | Protein Name                                                                    |
|------|-------|---------|-----|------------------|----------------|-------------------------|---------------------------------|----------------------------|-----------------------------|--------------------|---------|-------------|---------------------------------------------------------------------------------|
| 1    | 17.90 | 89.2    | 11  | 3/25             | K421k          | (K)KLFETQESGDLNEELVK(A) | 1978.9968                       | 114.0606                   | 8.4                         | 110136.6/6.47      | HUMAN   | Q86YT6      | E3 ubiquitin-protein ligase MB1 OS=Homo sapiens GN=MB1 PE=2 SV=1                |
| 2    | 6.25  | 58.8    | 3   | 12/25            | K533k          | (K)KIEHAPSPSSGTLKNDK(A) | 1979.0556                       | 114.0017                   | -19.7                       | 164924.0/9.71      | HUMAN   | Q14004      | Cell division cycle 2-like protein kinase 5 OS=Homo sapiens GN=CDC2L5 PE=1 SV=2 |

Detailed Results

| Rank                    | Score | SPI (%) | BCS | # Unmatched Ions | Variable sites | Sequence                                 | MH <sup>+</sup> Calculated (Da) | MH <sup>+</sup> Error (Da) | MH <sup>+</sup> Error (ppm) | Protein MW/pl (Da) | Species | Accession # | MS-Digest Index # | Protein Name                                                     |         |         |         |         |         |         |         |                       |         |                       |         |         |         |         |          |          |          |      |      |      |
|-------------------------|-------|---------|-----|------------------|----------------|------------------------------------------|---------------------------------|----------------------------|-----------------------------|--------------------|---------|-------------|-------------------|------------------------------------------------------------------|---------|---------|---------|---------|---------|---------|---------|-----------------------|---------|-----------------------|---------|---------|---------|---------|----------|----------|----------|------|------|------|
| 1                       | 17.90 | 89.2    | 11  | 3/25             | K421k          | (K)k L\F\B\T Q\E/S/G D L/N/E/E/L V/K (A) | 1978.9968                       | 114.0606                   | 8.4                         | 110136.6/6.47      | HUMAN   | Q86YT6      | 395271            | E3 ubiquitin-protein ligase MB1 OS=Homo sapiens GN=MB1 PE=2 SV=1 |         |         |         |         |         |         |         |                       |         |                       |         |         |         |         |          |          |          |      |      |      |
|                         |       |         |     |                  |                |                                          | 84.042                          | 84.081                     | 86.097                      | 102.053            | 129.100 | 130.091     | 147.112           | 201.119                                                          | 213.084 | 230.112 | 356.225 | 359.255 | 488.310 | 503.301 | 537.272 | 617.350               | 632.347 | 672.326 <sup>+2</sup> | 714.378 | 731.404 | 861.458 | 990.482 | 1016.535 | 1103.568 | 1232.605 |      |      |      |
| Frac. Inten. (% of TIC) |       |         |     |                  |                |                                          | 0.10                            | 0.34                       | 0.24                        | 0.13               | 0.17    | 4.24        | 7.23              | 4.15                                                             | 3.16    | 2.89    | 3.69    | 3.26    | 4.05    | 3.17    | 3.44    | 3.11                  | 4.99    | 3.18                  | 3.90    | 13.87   | 5.77    | 3.92    | 10.15    | 7.69     | 3.15     |      |      |      |
| Rel. Inten. (% of BP)   |       |         |     |                  |                |                                          | 0.75                            | 2.46                       | 1.72                        | 0.97               | 1.25    | 30.55       | 52.10             | 29.89                                                            | 22.81   | 20.84   | 26.58   | 23.48   | 29.21   | 22.86   | 24.83   | 22.44                 | 35.94   | 22.92                 | 28.10   | 100.00  | 41.62   | 28.27   | 73.17    | 55.46    | 22.74    |      |      |      |
| Score                   |       |         |     |                  |                |                                          | 0.50                            | 0.22                       | 1.00                        | 0.20               | 0.50    | 1.50        | 1.50              | -0.30                                                            | -0.23   | 0.75    | 0.50    | 1.50    | 0.50    | -0.25   | 1.50    | 0.50                  | 0.50    | 0.50                  | 0.50    | 0.50    | 0.50    | 0.50    | 0.50     | 0.50     | 0.50     | 1.50 | 1.50 | 1.50 |
| Ion-type                |       |         |     |                  |                |                                          | E                               | KQ                         | LI                          | E                  | RKQ     | y1-NH3      | y1                |                                                                  | TQ      | b2      | y2      | y4      | b3      | y5      | b4      | y12-NH3 <sup>+2</sup> | y6-NH3  | y6                    | b6      | b7      | y9      | y10     | y11      |          |          |      |      |      |
| Delta ppm               |       |         |     |                  |                |                                          | -2.1                            | 3.2                        | -18.2                       | -14.2              |         | 33.4        | -6.8              |                                                                  |         | -11.4   | -16.1   | -28.1   | 3.3     | 3.5     |         | -0.9                  | 9.0     | 9.1                   | 14.9    | 13.8    | 12.4    | -8.6    | 9.2      | 9.2      | 3.7      |      |      |      |

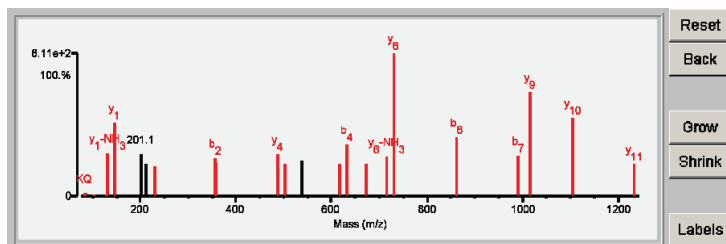

Result Summary

| Rank | Score | SPI (%) | BCS | # Unmatched Ions | Variable sites | Sequence            | MH <sup>+</sup> Calculated (Da) | MH <sup>+</sup> Error (Da) | MH <sup>+</sup> Error (ppm) | Protein MW/pi (Da) | Species | Accession # | Protein Name                                                         |
|------|-------|---------|-----|------------------|----------------|---------------------|---------------------------------|----------------------------|-----------------------------|--------------------|---------|-------------|----------------------------------------------------------------------|
| 1    | 13.52 | 80.5    | 9   | 4/25             | K197k          | (K)RPEPSTSLKQVTK(V) | 1668.9279                       | 114.0488                   | 3.3                         | 56194.9/7.17       | HUMAN   | Q9NS91      | E3 ubiquitin-protein ligase RAD18 OS=Homo sapiens GN=RAD18 PE=1 SV=1 |
| 2    | 6.33  | 64.1    | 7   | 8/25             | K201k          | (K)RPEPSTSLKQVTK(V) | 1668.9279                       | 114.0488                   | 3.3                         | 56194.9/7.17       | HUMAN   | Q9NS91      | E3 ubiquitin-protein ligase RAD18 OS=Homo sapiens GN=RAD18 PE=1 SV=1 |

Detailed Results

| Rank                                                                                                                                                                                                                                                                                                                                                                                                                                                                                                                                                                                                                                                                                                                                                                                                                                                                                                                                                                                                                                                                                                                                                                                                                                                                                                                                                                                                                                                                                                                                                                                                                                                                                                                                                                                                                                                                                                                                                                                                                                                                                                                                                                                                                                                                                                                                                                                                                                                                                                                                                                                                                                                                                                                                                                                                                                                                                                                                                                                                                                                                                                                                                                                                                                                                                                                                                                                                                                                                                                                                                 | Score  | SPI (%)          | BCS    | # Unmatched Ions | Variable sites | Sequence                                       | MH <sup>+</sup> Calculated (Da) | MH <sup>+</sup> Error (Da) | MH <sup>+</sup> Error (ppm) | Protein MW/pi (Da) | Species          | Accession #           | MS-Digest Index # | Protein Name                                                         |                       |                       |         |         |         |                       |                       |         |                       |         |         |         |                       |         |                       |                       |                       |         |         |         |                       |                       |         |                       |         |         |                         |      |      |      |      |      |      |      |      |      |      |      |      |      |      |      |      |      |      |      |      |      |      |      |      |      |                       |      |       |      |      |      |       |       |       |       |       |       |       |       |       |       |       |       |       |       |        |       |       |       |       |       |       |      |      |      |      |      |      |      |      |      |      |      |      |      |       |      |       |      |      |      |       |      |      |       |      |      |          |    |                  |    |    |     |        |    |    |    |        |    |                      |    |  |                       |  |        |    |    |  |                   |    |    |    |  |           |     |       |      |       |       |       |       |      |      |      |       |      |      |  |      |  |       |      |      |  |       |      |  |      |       |  |  |  |  |  |  |  |  |  |  |          |                  |  |  |  |  |  |  |  |  |  |  |  |  |  |  |  |  |  |  |  |  |  |  |  |  |      |  |  |  |  |  |  |  |  |  |  |  |  |  |  |  |  |  |  |  |  |  |  |  |  |  |      |  |  |  |  |  |  |  |  |  |  |  |  |  |  |  |
|------------------------------------------------------------------------------------------------------------------------------------------------------------------------------------------------------------------------------------------------------------------------------------------------------------------------------------------------------------------------------------------------------------------------------------------------------------------------------------------------------------------------------------------------------------------------------------------------------------------------------------------------------------------------------------------------------------------------------------------------------------------------------------------------------------------------------------------------------------------------------------------------------------------------------------------------------------------------------------------------------------------------------------------------------------------------------------------------------------------------------------------------------------------------------------------------------------------------------------------------------------------------------------------------------------------------------------------------------------------------------------------------------------------------------------------------------------------------------------------------------------------------------------------------------------------------------------------------------------------------------------------------------------------------------------------------------------------------------------------------------------------------------------------------------------------------------------------------------------------------------------------------------------------------------------------------------------------------------------------------------------------------------------------------------------------------------------------------------------------------------------------------------------------------------------------------------------------------------------------------------------------------------------------------------------------------------------------------------------------------------------------------------------------------------------------------------------------------------------------------------------------------------------------------------------------------------------------------------------------------------------------------------------------------------------------------------------------------------------------------------------------------------------------------------------------------------------------------------------------------------------------------------------------------------------------------------------------------------------------------------------------------------------------------------------------------------------------------------------------------------------------------------------------------------------------------------------------------------------------------------------------------------------------------------------------------------------------------------------------------------------------------------------------------------------------------------------------------------------------------------------------------------------------------------|--------|------------------|--------|------------------|----------------|------------------------------------------------|---------------------------------|----------------------------|-----------------------------|--------------------|------------------|-----------------------|-------------------|----------------------------------------------------------------------|-----------------------|-----------------------|---------|---------|---------|-----------------------|-----------------------|---------|-----------------------|---------|---------|---------|-----------------------|---------|-----------------------|-----------------------|-----------------------|---------|---------|---------|-----------------------|-----------------------|---------|-----------------------|---------|---------|-------------------------|------|------|------|------|------|------|------|------|------|------|------|------|------|------|------|------|------|------|------|------|------|------|------|------|------|-----------------------|------|-------|------|------|------|-------|-------|-------|-------|-------|-------|-------|-------|-------|-------|-------|-------|-------|-------|--------|-------|-------|-------|-------|-------|-------|------|------|------|------|------|------|------|------|------|------|------|------|------|-------|------|-------|------|------|------|-------|------|------|-------|------|------|----------|----|------------------|----|----|-----|--------|----|----|----|--------|----|----------------------|----|--|-----------------------|--|--------|----|----|--|-------------------|----|----|----|--|-----------|-----|-------|------|-------|-------|-------|-------|------|------|------|-------|------|------|--|------|--|-------|------|------|--|-------|------|--|------|-------|--|--|--|--|--|--|--|--|--|--|----------|------------------|--|--|--|--|--|--|--|--|--|--|--|--|--|--|--|--|--|--|--|--|--|--|--|--|------|--|--|--|--|--|--|--|--|--|--|--|--|--|--|--|--|--|--|--|--|--|--|--|--|--|------|--|--|--|--|--|--|--|--|--|--|--|--|--|--|--|
| 1                                                                                                                                                                                                                                                                                                                                                                                                                                                                                                                                                                                                                                                                                                                                                                                                                                                                                                                                                                                                                                                                                                                                                                                                                                                                                                                                                                                                                                                                                                                                                                                                                                                                                                                                                                                                                                                                                                                                                                                                                                                                                                                                                                                                                                                                                                                                                                                                                                                                                                                                                                                                                                                                                                                                                                                                                                                                                                                                                                                                                                                                                                                                                                                                                                                                                                                                                                                                                                                                                                                                                    | 13.52  | 80.5             | 9      | 4/25             | K197k          | (K)R P I E V P L P S T S / T L L K Q V T K (V) | 1668.9279                       | 114.0488                   | 3.3                         | 56194.9/7.17       | HUMAN            | Q9NS91                | 277676            | E3 ubiquitin-protein ligase RAD18 OS=Homo sapiens GN=RAD18 PE=1 SV=1 |                       |                       |         |         |         |                       |                       |         |                       |         |         |         |                       |         |                       |                       |                       |         |         |         |                       |                       |         |                       |         |         |                         |      |      |      |      |      |      |      |      |      |      |      |      |      |      |      |      |      |      |      |      |      |      |      |      |      |                       |      |       |      |      |      |       |       |       |       |       |       |       |       |       |       |       |       |       |       |        |       |       |       |       |       |       |      |      |      |      |      |      |      |      |      |      |      |      |      |       |      |       |      |      |      |       |      |      |       |      |      |          |    |                  |    |    |     |        |    |    |    |        |    |                      |    |  |                       |  |        |    |    |  |                   |    |    |    |  |           |     |       |      |       |       |       |       |      |      |      |       |      |      |  |      |  |       |      |      |  |       |      |  |      |       |  |  |  |  |  |  |  |  |  |  |          |                  |  |  |  |  |  |  |  |  |  |  |  |  |  |  |  |  |  |  |  |  |  |  |  |  |      |  |  |  |  |  |  |  |  |  |  |  |  |  |  |  |  |  |  |  |  |  |  |  |  |  |      |  |  |  |  |  |  |  |  |  |  |  |  |  |  |  |
| <table border="1"> <thead> <tr> <th>Fragment-ion (m/z)</th> <th>70.065</th> <th>74.059</th> <th>84.080</th> <th>86.095</th> <th>129.101</th> <th>130.083</th> <th>147.111</th> <th>248.163</th> <th>254.161</th> <th>365.194</th> <th>383.201</th> <th>468.231<sup>+2</sup></th> <th>480.255</th> <th>483.284<sup>+2</sup></th> <th>524.771<sup>+2</sup></th> <th>571.321<sup>+3</sup></th> <th>646.324</th> <th>664.352</th> <th>717.424</th> <th>718.434<sup>+2</sup></th> <th>765.392<sup>+2</sup></th> <th>830.518</th> <th>834.415<sup>+2</sup></th> <th>931.572</th> <th>953.488</th> </tr> </thead> <tbody> <tr> <td>Frac. Inten. (% of TIC)</td> <td>0.01</td> <td>5.01</td> <td>0.26</td> <td>0.27</td> <td>0.10</td> <td>2.80</td> <td>4.22</td> <td>4.36</td> <td>4.82</td> <td>4.61</td> <td>6.10</td> <td>4.99</td> <td>6.23</td> <td>5.44</td> <td>3.07</td> <td>3.29</td> <td>5.97</td> <td>3.24</td> <td>7.11</td> <td>7.50</td> <td>3.82</td> <td>6.92</td> <td>3.29</td> <td>3.28</td> <td>3.29</td> </tr> <tr> <td>Rel. Inten. (% of BP)</td> <td>0.17</td> <td>66.83</td> <td>3.48</td> <td>3.59</td> <td>1.31</td> <td>37.29</td> <td>56.31</td> <td>58.13</td> <td>64.32</td> <td>61.52</td> <td>81.38</td> <td>66.55</td> <td>83.09</td> <td>72.52</td> <td>40.94</td> <td>43.89</td> <td>79.64</td> <td>43.26</td> <td>94.77</td> <td>100.00</td> <td>50.94</td> <td>92.23</td> <td>43.87</td> <td>43.76</td> <td>43.89</td> </tr> <tr> <td>Score</td> <td>0.20</td> <td>1.50</td> <td>0.50</td> <td>0.22</td> <td>0.20</td> <td>0.50</td> <td>1.50</td> <td>1.50</td> <td>0.50</td> <td>0.75</td> <td>0.75</td> <td>0.25</td> <td>0.50</td> <td>-0.73</td> <td>0.25</td> <td>-0.44</td> <td>0.25</td> <td>0.50</td> <td>1.50</td> <td>-1.00</td> <td>1.50</td> <td>1.50</td> <td>-0.44</td> <td>1.50</td> <td>0.50</td> </tr> <tr> <td>Ion-type</td> <td>PR</td> <td>y<sup>++1</sup></td> <td>KQ</td> <td>LI</td> <td>RKQ</td> <td>y1-NH3</td> <td>y1</td> <td>y2</td> <td>b2</td> <td>b3-H2O</td> <td>b3</td> <td>b9-H2O<sup>+2</sup></td> <td>b4</td> <td></td> <td>b10-H2O<sup>+2</sup></td> <td></td> <td>b6-H2O</td> <td>b6</td> <td>y5</td> <td></td> <td>y13<sup>+2</sup></td> <td>y6</td> <td>y7</td> <td>b9</td> <td></td> </tr> <tr> <td>Delta ppm</td> <td>3.9</td> <td>-16.7</td> <td>-6.8</td> <td>-21.2</td> <td>-12.7</td> <td>-25.0</td> <td>-15.7</td> <td>10.1</td> <td>-6.5</td> <td>-0.8</td> <td>-10.3</td> <td>-4.6</td> <td>-5.0</td> <td></td> <td>-7.4</td> <td></td> <td>-12.3</td> <td>15.2</td> <td>-2.2</td> <td></td> <td>-26.0</td> <td>10.7</td> <td></td> <td>16.5</td> <td>-12.1</td> </tr> <tr> <td></td> <td>PPST-H2O</td> <td>b<sup>++7</sup></td> <td></td> </tr> <tr> <td></td> <td>PPST</td> <td></td> </tr> <tr> <td></td> <td>19.0</td> <td></td> </tr> </tbody> </table> |        |                  |        |                  |                |                                                |                                 |                            |                             |                    |                  |                       |                   |                                                                      | Fragment-ion (m/z)    | 70.065                | 74.059  | 84.080  | 86.095  | 129.101               | 130.083               | 147.111 | 248.163               | 254.161 | 365.194 | 383.201 | 468.231 <sup>+2</sup> | 480.255 | 483.284 <sup>+2</sup> | 524.771 <sup>+2</sup> | 571.321 <sup>+3</sup> | 646.324 | 664.352 | 717.424 | 718.434 <sup>+2</sup> | 765.392 <sup>+2</sup> | 830.518 | 834.415 <sup>+2</sup> | 931.572 | 953.488 | Frac. Inten. (% of TIC) | 0.01 | 5.01 | 0.26 | 0.27 | 0.10 | 2.80 | 4.22 | 4.36 | 4.82 | 4.61 | 6.10 | 4.99 | 6.23 | 5.44 | 3.07 | 3.29 | 5.97 | 3.24 | 7.11 | 7.50 | 3.82 | 6.92 | 3.29 | 3.28 | 3.29 | Rel. Inten. (% of BP) | 0.17 | 66.83 | 3.48 | 3.59 | 1.31 | 37.29 | 56.31 | 58.13 | 64.32 | 61.52 | 81.38 | 66.55 | 83.09 | 72.52 | 40.94 | 43.89 | 79.64 | 43.26 | 94.77 | 100.00 | 50.94 | 92.23 | 43.87 | 43.76 | 43.89 | Score | 0.20 | 1.50 | 0.50 | 0.22 | 0.20 | 0.50 | 1.50 | 1.50 | 0.50 | 0.75 | 0.75 | 0.25 | 0.50 | -0.73 | 0.25 | -0.44 | 0.25 | 0.50 | 1.50 | -1.00 | 1.50 | 1.50 | -0.44 | 1.50 | 0.50 | Ion-type | PR | y <sup>++1</sup> | KQ | LI | RKQ | y1-NH3 | y1 | y2 | b2 | b3-H2O | b3 | b9-H2O <sup>+2</sup> | b4 |  | b10-H2O <sup>+2</sup> |  | b6-H2O | b6 | y5 |  | y13 <sup>+2</sup> | y6 | y7 | b9 |  | Delta ppm | 3.9 | -16.7 | -6.8 | -21.2 | -12.7 | -25.0 | -15.7 | 10.1 | -6.5 | -0.8 | -10.3 | -4.6 | -5.0 |  | -7.4 |  | -12.3 | 15.2 | -2.2 |  | -26.0 | 10.7 |  | 16.5 | -12.1 |  |  |  |  |  |  |  |  |  |  | PPST-H2O | b <sup>++7</sup> |  |  |  |  |  |  |  |  |  |  |  |  |  |  |  |  |  |  |  |  |  |  |  |  | PPST |  |  |  |  |  |  |  |  |  |  |  |  |  |  |  |  |  |  |  |  |  |  |  |  |  | 19.0 |  |  |  |  |  |  |  |  |  |  |  |  |  |  |  |
| Fragment-ion (m/z)                                                                                                                                                                                                                                                                                                                                                                                                                                                                                                                                                                                                                                                                                                                                                                                                                                                                                                                                                                                                                                                                                                                                                                                                                                                                                                                                                                                                                                                                                                                                                                                                                                                                                                                                                                                                                                                                                                                                                                                                                                                                                                                                                                                                                                                                                                                                                                                                                                                                                                                                                                                                                                                                                                                                                                                                                                                                                                                                                                                                                                                                                                                                                                                                                                                                                                                                                                                                                                                                                                                                   | 70.065 | 74.059           | 84.080 | 86.095           | 129.101        | 130.083                                        | 147.111                         | 248.163                    | 254.161                     | 365.194            | 383.201          | 468.231 <sup>+2</sup> | 480.255           | 483.284 <sup>+2</sup>                                                | 524.771 <sup>+2</sup> | 571.321 <sup>+3</sup> | 646.324 | 664.352 | 717.424 | 718.434 <sup>+2</sup> | 765.392 <sup>+2</sup> | 830.518 | 834.415 <sup>+2</sup> | 931.572 | 953.488 |         |                       |         |                       |                       |                       |         |         |         |                       |                       |         |                       |         |         |                         |      |      |      |      |      |      |      |      |      |      |      |      |      |      |      |      |      |      |      |      |      |      |      |      |      |                       |      |       |      |      |      |       |       |       |       |       |       |       |       |       |       |       |       |       |       |        |       |       |       |       |       |       |      |      |      |      |      |      |      |      |      |      |      |      |      |       |      |       |      |      |      |       |      |      |       |      |      |          |    |                  |    |    |     |        |    |    |    |        |    |                      |    |  |                       |  |        |    |    |  |                   |    |    |    |  |           |     |       |      |       |       |       |       |      |      |      |       |      |      |  |      |  |       |      |      |  |       |      |  |      |       |  |  |  |  |  |  |  |  |  |  |          |                  |  |  |  |  |  |  |  |  |  |  |  |  |  |  |  |  |  |  |  |  |  |  |  |  |      |  |  |  |  |  |  |  |  |  |  |  |  |  |  |  |  |  |  |  |  |  |  |  |  |  |      |  |  |  |  |  |  |  |  |  |  |  |  |  |  |  |
| Frac. Inten. (% of TIC)                                                                                                                                                                                                                                                                                                                                                                                                                                                                                                                                                                                                                                                                                                                                                                                                                                                                                                                                                                                                                                                                                                                                                                                                                                                                                                                                                                                                                                                                                                                                                                                                                                                                                                                                                                                                                                                                                                                                                                                                                                                                                                                                                                                                                                                                                                                                                                                                                                                                                                                                                                                                                                                                                                                                                                                                                                                                                                                                                                                                                                                                                                                                                                                                                                                                                                                                                                                                                                                                                                                              | 0.01   | 5.01             | 0.26   | 0.27             | 0.10           | 2.80                                           | 4.22                            | 4.36                       | 4.82                        | 4.61               | 6.10             | 4.99                  | 6.23              | 5.44                                                                 | 3.07                  | 3.29                  | 5.97    | 3.24    | 7.11    | 7.50                  | 3.82                  | 6.92    | 3.29                  | 3.28    | 3.29    |         |                       |         |                       |                       |                       |         |         |         |                       |                       |         |                       |         |         |                         |      |      |      |      |      |      |      |      |      |      |      |      |      |      |      |      |      |      |      |      |      |      |      |      |      |                       |      |       |      |      |      |       |       |       |       |       |       |       |       |       |       |       |       |       |       |        |       |       |       |       |       |       |      |      |      |      |      |      |      |      |      |      |      |      |      |       |      |       |      |      |      |       |      |      |       |      |      |          |    |                  |    |    |     |        |    |    |    |        |    |                      |    |  |                       |  |        |    |    |  |                   |    |    |    |  |           |     |       |      |       |       |       |       |      |      |      |       |      |      |  |      |  |       |      |      |  |       |      |  |      |       |  |  |  |  |  |  |  |  |  |  |          |                  |  |  |  |  |  |  |  |  |  |  |  |  |  |  |  |  |  |  |  |  |  |  |  |  |      |  |  |  |  |  |  |  |  |  |  |  |  |  |  |  |  |  |  |  |  |  |  |  |  |  |      |  |  |  |  |  |  |  |  |  |  |  |  |  |  |  |
| Rel. Inten. (% of BP)                                                                                                                                                                                                                                                                                                                                                                                                                                                                                                                                                                                                                                                                                                                                                                                                                                                                                                                                                                                                                                                                                                                                                                                                                                                                                                                                                                                                                                                                                                                                                                                                                                                                                                                                                                                                                                                                                                                                                                                                                                                                                                                                                                                                                                                                                                                                                                                                                                                                                                                                                                                                                                                                                                                                                                                                                                                                                                                                                                                                                                                                                                                                                                                                                                                                                                                                                                                                                                                                                                                                | 0.17   | 66.83            | 3.48   | 3.59             | 1.31           | 37.29                                          | 56.31                           | 58.13                      | 64.32                       | 61.52              | 81.38            | 66.55                 | 83.09             | 72.52                                                                | 40.94                 | 43.89                 | 79.64   | 43.26   | 94.77   | 100.00                | 50.94                 | 92.23   | 43.87                 | 43.76   | 43.89   |         |                       |         |                       |                       |                       |         |         |         |                       |                       |         |                       |         |         |                         |      |      |      |      |      |      |      |      |      |      |      |      |      |      |      |      |      |      |      |      |      |      |      |      |      |                       |      |       |      |      |      |       |       |       |       |       |       |       |       |       |       |       |       |       |       |        |       |       |       |       |       |       |      |      |      |      |      |      |      |      |      |      |      |      |      |       |      |       |      |      |      |       |      |      |       |      |      |          |    |                  |    |    |     |        |    |    |    |        |    |                      |    |  |                       |  |        |    |    |  |                   |    |    |    |  |           |     |       |      |       |       |       |       |      |      |      |       |      |      |  |      |  |       |      |      |  |       |      |  |      |       |  |  |  |  |  |  |  |  |  |  |          |                  |  |  |  |  |  |  |  |  |  |  |  |  |  |  |  |  |  |  |  |  |  |  |  |  |      |  |  |  |  |  |  |  |  |  |  |  |  |  |  |  |  |  |  |  |  |  |  |  |  |  |      |  |  |  |  |  |  |  |  |  |  |  |  |  |  |  |
| Score                                                                                                                                                                                                                                                                                                                                                                                                                                                                                                                                                                                                                                                                                                                                                                                                                                                                                                                                                                                                                                                                                                                                                                                                                                                                                                                                                                                                                                                                                                                                                                                                                                                                                                                                                                                                                                                                                                                                                                                                                                                                                                                                                                                                                                                                                                                                                                                                                                                                                                                                                                                                                                                                                                                                                                                                                                                                                                                                                                                                                                                                                                                                                                                                                                                                                                                                                                                                                                                                                                                                                | 0.20   | 1.50             | 0.50   | 0.22             | 0.20           | 0.50                                           | 1.50                            | 1.50                       | 0.50                        | 0.75               | 0.75             | 0.25                  | 0.50              | -0.73                                                                | 0.25                  | -0.44                 | 0.25    | 0.50    | 1.50    | -1.00                 | 1.50                  | 1.50    | -0.44                 | 1.50    | 0.50    |         |                       |         |                       |                       |                       |         |         |         |                       |                       |         |                       |         |         |                         |      |      |      |      |      |      |      |      |      |      |      |      |      |      |      |      |      |      |      |      |      |      |      |      |      |                       |      |       |      |      |      |       |       |       |       |       |       |       |       |       |       |       |       |       |       |        |       |       |       |       |       |       |      |      |      |      |      |      |      |      |      |      |      |      |      |       |      |       |      |      |      |       |      |      |       |      |      |          |    |                  |    |    |     |        |    |    |    |        |    |                      |    |  |                       |  |        |    |    |  |                   |    |    |    |  |           |     |       |      |       |       |       |       |      |      |      |       |      |      |  |      |  |       |      |      |  |       |      |  |      |       |  |  |  |  |  |  |  |  |  |  |          |                  |  |  |  |  |  |  |  |  |  |  |  |  |  |  |  |  |  |  |  |  |  |  |  |  |      |  |  |  |  |  |  |  |  |  |  |  |  |  |  |  |  |  |  |  |  |  |  |  |  |  |      |  |  |  |  |  |  |  |  |  |  |  |  |  |  |  |
| Ion-type                                                                                                                                                                                                                                                                                                                                                                                                                                                                                                                                                                                                                                                                                                                                                                                                                                                                                                                                                                                                                                                                                                                                                                                                                                                                                                                                                                                                                                                                                                                                                                                                                                                                                                                                                                                                                                                                                                                                                                                                                                                                                                                                                                                                                                                                                                                                                                                                                                                                                                                                                                                                                                                                                                                                                                                                                                                                                                                                                                                                                                                                                                                                                                                                                                                                                                                                                                                                                                                                                                                                             | PR     | y <sup>++1</sup> | KQ     | LI               | RKQ            | y1-NH3                                         | y1                              | y2                         | b2                          | b3-H2O             | b3               | b9-H2O <sup>+2</sup>  | b4                |                                                                      | b10-H2O <sup>+2</sup> |                       | b6-H2O  | b6      | y5      |                       | y13 <sup>+2</sup>     | y6      | y7                    | b9      |         |         |                       |         |                       |                       |                       |         |         |         |                       |                       |         |                       |         |         |                         |      |      |      |      |      |      |      |      |      |      |      |      |      |      |      |      |      |      |      |      |      |      |      |      |      |                       |      |       |      |      |      |       |       |       |       |       |       |       |       |       |       |       |       |       |       |        |       |       |       |       |       |       |      |      |      |      |      |      |      |      |      |      |      |      |      |       |      |       |      |      |      |       |      |      |       |      |      |          |    |                  |    |    |     |        |    |    |    |        |    |                      |    |  |                       |  |        |    |    |  |                   |    |    |    |  |           |     |       |      |       |       |       |       |      |      |      |       |      |      |  |      |  |       |      |      |  |       |      |  |      |       |  |  |  |  |  |  |  |  |  |  |          |                  |  |  |  |  |  |  |  |  |  |  |  |  |  |  |  |  |  |  |  |  |  |  |  |  |      |  |  |  |  |  |  |  |  |  |  |  |  |  |  |  |  |  |  |  |  |  |  |  |  |  |      |  |  |  |  |  |  |  |  |  |  |  |  |  |  |  |
| Delta ppm                                                                                                                                                                                                                                                                                                                                                                                                                                                                                                                                                                                                                                                                                                                                                                                                                                                                                                                                                                                                                                                                                                                                                                                                                                                                                                                                                                                                                                                                                                                                                                                                                                                                                                                                                                                                                                                                                                                                                                                                                                                                                                                                                                                                                                                                                                                                                                                                                                                                                                                                                                                                                                                                                                                                                                                                                                                                                                                                                                                                                                                                                                                                                                                                                                                                                                                                                                                                                                                                                                                                            | 3.9    | -16.7            | -6.8   | -21.2            | -12.7          | -25.0                                          | -15.7                           | 10.1                       | -6.5                        | -0.8               | -10.3            | -4.6                  | -5.0              |                                                                      | -7.4                  |                       | -12.3   | 15.2    | -2.2    |                       | -26.0                 | 10.7    |                       | 16.5    | -12.1   |         |                       |         |                       |                       |                       |         |         |         |                       |                       |         |                       |         |         |                         |      |      |      |      |      |      |      |      |      |      |      |      |      |      |      |      |      |      |      |      |      |      |      |      |      |                       |      |       |      |      |      |       |       |       |       |       |       |       |       |       |       |       |       |       |       |        |       |       |       |       |       |       |      |      |      |      |      |      |      |      |      |      |      |      |      |       |      |       |      |      |      |       |      |      |       |      |      |          |    |                  |    |    |     |        |    |    |    |        |    |                      |    |  |                       |  |        |    |    |  |                   |    |    |    |  |           |     |       |      |       |       |       |       |      |      |      |       |      |      |  |      |  |       |      |      |  |       |      |  |      |       |  |  |  |  |  |  |  |  |  |  |          |                  |  |  |  |  |  |  |  |  |  |  |  |  |  |  |  |  |  |  |  |  |  |  |  |  |      |  |  |  |  |  |  |  |  |  |  |  |  |  |  |  |  |  |  |  |  |  |  |  |  |  |      |  |  |  |  |  |  |  |  |  |  |  |  |  |  |  |
|                                                                                                                                                                                                                                                                                                                                                                                                                                                                                                                                                                                                                                                                                                                                                                                                                                                                                                                                                                                                                                                                                                                                                                                                                                                                                                                                                                                                                                                                                                                                                                                                                                                                                                                                                                                                                                                                                                                                                                                                                                                                                                                                                                                                                                                                                                                                                                                                                                                                                                                                                                                                                                                                                                                                                                                                                                                                                                                                                                                                                                                                                                                                                                                                                                                                                                                                                                                                                                                                                                                                                      |        |                  |        |                  |                |                                                |                                 |                            |                             | PPST-H2O           | b <sup>++7</sup> |                       |                   |                                                                      |                       |                       |         |         |         |                       |                       |         |                       |         |         |         |                       |         |                       |                       |                       |         |         |         |                       |                       |         |                       |         |         |                         |      |      |      |      |      |      |      |      |      |      |      |      |      |      |      |      |      |      |      |      |      |      |      |      |      |                       |      |       |      |      |      |       |       |       |       |       |       |       |       |       |       |       |       |       |       |        |       |       |       |       |       |       |      |      |      |      |      |      |      |      |      |      |      |      |      |       |      |       |      |      |      |       |      |      |       |      |      |          |    |                  |    |    |     |        |    |    |    |        |    |                      |    |  |                       |  |        |    |    |  |                   |    |    |    |  |           |     |       |      |       |       |       |       |      |      |      |       |      |      |  |      |  |       |      |      |  |       |      |  |      |       |  |  |  |  |  |  |  |  |  |  |          |                  |  |  |  |  |  |  |  |  |  |  |  |  |  |  |  |  |  |  |  |  |  |  |  |  |      |  |  |  |  |  |  |  |  |  |  |  |  |  |  |  |  |  |  |  |  |  |  |  |  |  |      |  |  |  |  |  |  |  |  |  |  |  |  |  |  |  |
|                                                                                                                                                                                                                                                                                                                                                                                                                                                                                                                                                                                                                                                                                                                                                                                                                                                                                                                                                                                                                                                                                                                                                                                                                                                                                                                                                                                                                                                                                                                                                                                                                                                                                                                                                                                                                                                                                                                                                                                                                                                                                                                                                                                                                                                                                                                                                                                                                                                                                                                                                                                                                                                                                                                                                                                                                                                                                                                                                                                                                                                                                                                                                                                                                                                                                                                                                                                                                                                                                                                                                      |        |                  |        |                  |                |                                                |                                 |                            |                             | PPST               |                  |                       |                   |                                                                      |                       |                       |         |         |         |                       |                       |         |                       |         |         |         |                       |         |                       |                       |                       |         |         |         |                       |                       |         |                       |         |         |                         |      |      |      |      |      |      |      |      |      |      |      |      |      |      |      |      |      |      |      |      |      |      |      |      |      |                       |      |       |      |      |      |       |       |       |       |       |       |       |       |       |       |       |       |       |       |        |       |       |       |       |       |       |      |      |      |      |      |      |      |      |      |      |      |      |      |       |      |       |      |      |      |       |      |      |       |      |      |          |    |                  |    |    |     |        |    |    |    |        |    |                      |    |  |                       |  |        |    |    |  |                   |    |    |    |  |           |     |       |      |       |       |       |       |      |      |      |       |      |      |  |      |  |       |      |      |  |       |      |  |      |       |  |  |  |  |  |  |  |  |  |  |          |                  |  |  |  |  |  |  |  |  |  |  |  |  |  |  |  |  |  |  |  |  |  |  |  |  |      |  |  |  |  |  |  |  |  |  |  |  |  |  |  |  |  |  |  |  |  |  |  |  |  |  |      |  |  |  |  |  |  |  |  |  |  |  |  |  |  |  |
|                                                                                                                                                                                                                                                                                                                                                                                                                                                                                                                                                                                                                                                                                                                                                                                                                                                                                                                                                                                                                                                                                                                                                                                                                                                                                                                                                                                                                                                                                                                                                                                                                                                                                                                                                                                                                                                                                                                                                                                                                                                                                                                                                                                                                                                                                                                                                                                                                                                                                                                                                                                                                                                                                                                                                                                                                                                                                                                                                                                                                                                                                                                                                                                                                                                                                                                                                                                                                                                                                                                                                      |        |                  |        |                  |                |                                                |                                 |                            |                             | 19.0               |                  |                       |                   |                                                                      |                       |                       |         |         |         |                       |                       |         |                       |         |         |         |                       |         |                       |                       |                       |         |         |         |                       |                       |         |                       |         |         |                         |      |      |      |      |      |      |      |      |      |      |      |      |      |      |      |      |      |      |      |      |      |      |      |      |      |                       |      |       |      |      |      |       |       |       |       |       |       |       |       |       |       |       |       |       |       |        |       |       |       |       |       |       |      |      |      |      |      |      |      |      |      |      |      |      |      |       |      |       |      |      |      |       |      |      |       |      |      |          |    |                  |    |    |     |        |    |    |    |        |    |                      |    |  |                       |  |        |    |    |  |                   |    |    |    |  |           |     |       |      |       |       |       |       |      |      |      |       |      |      |  |      |  |       |      |      |  |       |      |  |      |       |  |  |  |  |  |  |  |  |  |  |          |                  |  |  |  |  |  |  |  |  |  |  |  |  |  |  |  |  |  |  |  |  |  |  |  |  |      |  |  |  |  |  |  |  |  |  |  |  |  |  |  |  |  |  |  |  |  |  |  |  |  |  |      |  |  |  |  |  |  |  |  |  |  |  |  |  |  |  |

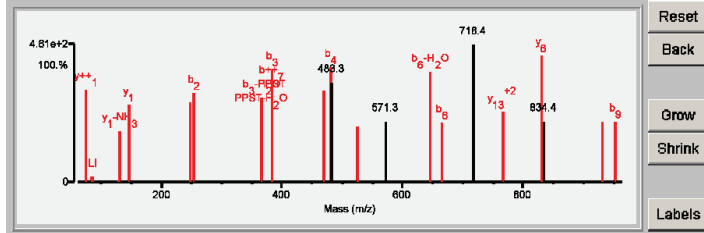

Reset

Back

Grow

Shrink

Labels

Result Summary

| Rank | Score | SPI (%) | BCS | # Unmatched Ions | Variable sites | Sequence                 | MH <sup>+</sup> Calculated (Da) | MH <sup>+</sup> Error (Da) | MH <sup>+</sup> Error (ppm) | Protein MW/pl (Da) | Species | Accession # | Protein Name                                                                 |
|------|-------|---------|-----|------------------|----------------|--------------------------|---------------------------------|----------------------------|-----------------------------|--------------------|---------|-------------|------------------------------------------------------------------------------|
| 1    | 23.47 | 100.0   | 11  | 0/25             | K309k          | (K)SAAEIVQEIEIEKTR(M)    | 1829.9603                       | 114.0639                   | 10.8                        | 56194.9/7.17       | HUMAN   | Q9NS91      | E3 ubiquitin-protein ligase RAD18 OS=Homo sapiens GN=RAD18 PE=1 SV=1         |
| 2    | 8.35  | 59.2    | 2   | 11/25            | None           | (K)QLTEKEFARIAELSAQTR(V) | 1944.0509                       | -0.0266                    | -13.7                       | 76068.7/5.58       | HUMAN   | RQ8N6Y0     | REVERSE USH1C-binding protein 1 OS=Homo sapiens GN=USHBP1 PE=1 SV=1          |
| 3    | 7.66  | 60.4    | 3   | 11/25            | K626k          | (R)LEVQVMQGTQKSTPR(V)    | 1829.9538                       | 114.0704                   | 14.2                        | 70519.5/5.60       | HUMAN   | AMFU49      | SH3 domain-containing protein C1orf113 OS=Homo sapiens GN=C1orf113 PE=1 SV=2 |
| 4    | 6.96  | 55.6    | 1   | 11/25            | None           | (K)EPLSAFAELDNLVYPKR(V)  | 1944.0073                       | 0.0170                     | 8.7                         | 21188.5/9.94       | HUMAN   | RQ9Y3C1     | REVERSE Nucleolar protein 16 OS=Homo sapiens GN=NOP16 PE=1 SV=2              |
| 5    | 6.72  | 51.8    | 3   | 13/25            | None           | (K)DCPVVWSAGNSELSLQLR(L) | 1943.9855                       | 0.0387                     | 19.9                        | 52901.5/7.07       | HUMAN   | Q15036      | Sorting nexin-17 OS=Homo sapiens GN=SNX17 PE=1 SV=1                          |

Detailed Results

| Rank | Score | SPI (%) | BCS | # Unmatched Ions | Variable sites | Sequence                                                   | MH <sup>+</sup> Calculated (Da) | MH <sup>+</sup> Error (Da) | MH <sup>+</sup> Error (ppm) | Protein MW/pl (Da) | Species | Accession # | MS-Digest Index # | Protein Name                                                         |
|------|-------|---------|-----|------------------|----------------|------------------------------------------------------------|---------------------------------|----------------------------|-----------------------------|--------------------|---------|-------------|-------------------|----------------------------------------------------------------------|
| 1    | 23.47 | 100.0   | 11  | 0/25             | K309k          | (K)S A I A \ E I I V Q / E / I / E / N / I E / k T / R (M) | 1829.9603                       | 114.0639                   | 10.8                        | 56194.9/7.17       | HUMAN   | Q9NS91      | 555351            | E3 ubiquitin-protein ligase RAD18 OS=Homo sapiens GN=RAD18 PE=1 SV=1 |

  

| Fragment-ion (m/z)      | 72.080 | 84.041 | 84.081 | 86.095 | 131.082 | 159.077 | 173.094 | 175.116 | 201.088 | 215.139 | 228.138 | 230.116 | 243.139 | 359.157 | 472.254 | 518.301 | 678.346*2 | 736.896*2 | 760.440 | 793.420*2 | 874.471 | 893.451*2 | 1003.513 | 1116.597 | 1245.625 |
|-------------------------|--------|--------|--------|--------|---------|---------|---------|---------|---------|---------|---------|---------|---------|---------|---------|---------|-----------|-----------|---------|-----------|---------|-----------|----------|----------|----------|
| Frac. Inten. (% of TIC) | 0.10   | 0.09   | 0.09   | 0.46   | 8.84    | 16.04   | 2.98    | 3.20    | 3.65    | 3.70    | 3.88    | 4.29    | 4.07    | 5.39    | 3.15    | 3.40    | 5.62      | 6.64      | 3.75    | 3.57      | 3.96    | 2.95      | 3.78     | 2.99     | 3.39     |
| Rel. Inten. (% of BP)   | 0.61   | 0.55   | 0.57   | 2.88   | 55.08   | 100.00  | 18.60   | 19.96   | 22.78   | 23.05   | 24.20   | 26.77   | 25.36   | 33.62   | 19.63   | 21.19   | 35.02     | 41.43     | 23.38   | 22.25     | 24.71   | 18.41     | 23.56    | 18.66    | 21.14    |
| Score                   | 0.50   | 1.00   | 0.50   | 0.22   | 0.50    | 0.50    | 1.50    | 0.75    | 0.50    | 0.75    | 0.50    | 0.75    | 0.50    | 0.50    | 1.50    | 1.50    | 1.50      | 1.50      | 1.50    | 1.50      | 1.50    | 1.50      | 1.50     | 1.50     | 1.50     |
| Ion-type                | V      | E      | KQ     | LI     | a2      | b2      | AE-28   | y1      | AE      | IE-28   | NI      | b3      | IE      | b4      | b5      | y3      | y10+H2O+2 | y11+2     | y5      | y12+2     | y6      | y14+2     | y7       | y8       | y9       |
| Delta ppm               | -10.8  | -39.1  | 7.4    | -14.2  | -3.8    | -1.4    | 4.8     | -14.6   | -1.9    | -3.8    | 12.0    | 3.8     | 18.0    | -0.3    | 26.9    | -6.6    | -5.3      | 10.2      | 11.1    | -13.8     | -3.7    | -22.5     | -4.1     | -3.6     | -14.7    |

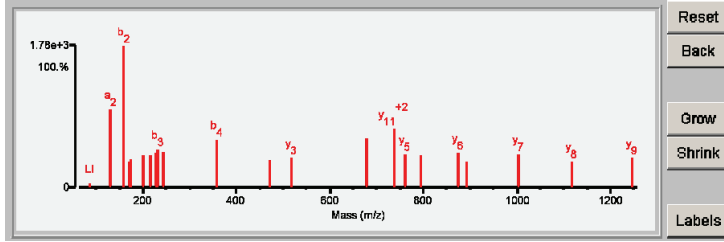

Result Summary

| Rank | Score | SPI (%) | BCS | # Unmatched Ions | Variable sites | Sequence              | MH <sup>+</sup> Calculated (Da) | MH <sup>+</sup> Error (Da) | MH <sup>+</sup> Error (ppm) | Protein MW/pI (Da) | Species | Accession # | Protein Name                                                         |
|------|-------|---------|-----|------------------|----------------|-----------------------|---------------------------------|----------------------------|-----------------------------|--------------------|---------|-------------|----------------------------------------------------------------------|
| 1    | 14.42 | 75.1    | 7   | 9/25             | K318k          | (R)LEASKLNESVMVFTK(D) | 1695.8986                       | 114.0584                   | 8.5                         | 56194.9/7.17       | HUMAN   | Q9NS91      | E3 ubiquitin-protein ligase RAD18 OS=Homo sapiens GN=RAD18 PE=1 SV=1 |

Detailed Results

| Rank                    | Score | SPI (%) | BCS    | # Unmatched Ions | Variable sites | Sequence              | MH <sup>+</sup> Calculated (Da) | MH <sup>+</sup> Error (Da) | MH <sup>+</sup> Error (ppm) | Protein MW/pI (Da) | Species | Accession # | MS-Digest Index # | Protein Name                                                         |         |                       |         |                       |         |         |         |         |                       |         |                       |         |
|-------------------------|-------|---------|--------|------------------|----------------|-----------------------|---------------------------------|----------------------------|-----------------------------|--------------------|---------|-------------|-------------------|----------------------------------------------------------------------|---------|-----------------------|---------|-----------------------|---------|---------|---------|---------|-----------------------|---------|-----------------------|---------|
| 1                       | 14.42 | 75.1    | 7      | 9/25             | K318k          | (R)LEASKLNESVMVFTK(D) | 1695.8986                       | 114.0584                   | 8.5                         | 56194.9/7.17       | HUMAN   | Q9NS91      | 555351            | E3 ubiquitin-protein ligase RAD18 OS=Homo sapiens GN=RAD18 PE=1 SV=1 |         |                       |         |                       |         |         |         |         |                       |         |                       |         |
| Fragment-Ion (m/z)      |       | 70.064  | 72.080 | 84.080           | 86.097         | 87.056                | 102.054                         | 129.099                    | 141.100                     | 147.111            | 187.142 | 215.139     | 243.132           | 244.085                                                              | 248.160 | 311.685 <sup>+2</sup> | 395.233 | 494.292 <sup>+2</sup> | 502.255 | 573.328 | 625.323 | 724.429 | 727.396 <sup>+2</sup> | 738.362 | 784.409 <sup>+2</sup> | 811.448 |
| Frac. Inten. (% of TIC) |       | 0.13    | 0.21   | 0.33             | 28.93          | 0.08                  | 0.12                            | 0.12                       | 2.42                        | 3.64               | 5.33    | 10.15       | 5.85              | 3.03                                                                 | 4.86    | 2.59                  | 3.78    | 2.69                  | 2.45    | 4.24    | 5.49    | 2.27    | 2.41                  | 2.59    | 3.40                  | 2.87    |
| Rel. Inten. (% of BP)   |       | 0.44    | 0.73   | 1.16             | 100.00         | 0.29                  | 0.40                            | 0.42                       | 8.37                        | 12.60              | 18.42   | 35.08       | 20.22             | 10.46                                                                | 16.81   | 8.94                  | 13.07   | 9.30                  | 8.48    | 14.66   | 18.99   | 7.85    | 8.33                  | 8.96    | 11.76                 | 9.92    |
| Score                   |       | -0.00   | 0.50   | 0.50             | 0.50           | 0.33                  | 1.00                            | 0.20                       | -0.08                       | 1.50               | -0.18   | 0.50        | 0.50              | 0.75                                                                 | 1.50    | -0.09                 | 1.50    | -0.09                 | -0.08   | -0.15   | 1.50    | 1.50    | -0.08                 | -0.09   | 1.50                  | 1.50    |
| Ion-type                |       | V       | KQ     | a1               | NR             | E                     | RKQ                             | y1                         | a2                          | b2                 | NE      | y2          | y3                | y5                                                                   | y6      | y7                    | y8      | y9                    | y10     | y11     | y12     | y13     | y14                   | y15     | y16                   | y17     |
| Delta ppm               |       | -13.5   | -9.2   | -8.4             | 0.50           | 5.9                   | -6.4                            | -22.8                      | -9.5                        | -6.6               | -10.8   | -38.1       | -1.9              | 11.1                                                                 | -13.0   | 31.9                  | -23.0   |                       |         |         |         |         |                       |         |                       |         |

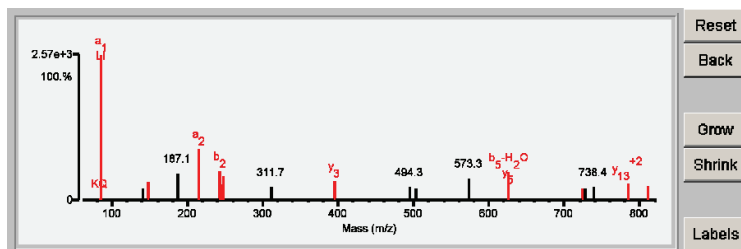

Reset  
Back  
Grow  
Shrink  
Labels



Result Summary

| Rank | Score | SPI (%) | BCS | # Unmatched Ions | Variable sites | Sequence                           | MH <sup>+</sup> Calculated (Da) | MH <sup>+</sup> Error (Da) | MH <sup>+</sup> Error (ppm) | Protein MW/pI (Da) | Species | Accession #            | Protein Name                                                                         |
|------|-------|---------|-----|------------------|----------------|------------------------------------|---------------------------------|----------------------------|-----------------------------|--------------------|---------|------------------------|--------------------------------------------------------------------------------------|
| 1    | 14.45 | 77.7    | 6   | 9/24             | K334k K341k    | (R) <u>LGETQkAMLDPPkPSR</u> (G)    | 1767.9422                       | 228.1000                   | 7.1                         | 51219.0/6.10       | HUMAN   | <a href="#">Q96BH1</a> | E3 ubiquitin-protein ligase RNF25 OS=Homo sapiens GN=RNF25 PE=1 SV=1                 |
| 2    | 8.81  | 75.8    | 4   | 10/24            | None           | (K) <u>KQSKQPDmTHLTELALR</u> (L)   | 1996.0644                       | -0.0223                    | -11.1                       | 109563.3/6.82      | HUMAN   | <a href="#">Q7Z3J2</a> | UPF0505 protein C16orf62 OS=Homo sapiens GN=C16orf62 PE=1 SV=2                       |
| 3    | 8.27  | 66.7    | 3   | 12/24            | K114k          | (R) <u>KSSTLEvkDVQLHLER</u> (Q)    | 1882.0393                       | 114.0029                   | -20.0                       | 17924.6/7.78       | HUMAN   | <a href="#">Q16514</a> | Transcription initiation factor TFIIID subunit 12 OS=Homo sapiens GN=TAF12 PE=1 SV=1 |
| 4    | 7.89  | 56.1    | 2   | 12/24            | K239k          | (R) <u>IHRkNAPAGGSGMASAKTK</u> (T) | 1882.0076                       | 114.0346                   | -4.2                        | 51486.9/9.26       | HUMAN   | <a href="#">P35348</a> | Alpha-1A adrenergic receptor OS=Homo sapiens GN=ADRA1A PE=2 SV=2                     |
| 5    | 7.23  | 62.6    | 4   | 13/24            | K267k          | (K) <u>VEIVCPQSPpkNCTR</u> (N)     | 1881.9310                       | 114.1112                   | 34.2                        | 31076.3/9.45       | HUMAN   | <a href="#">Q8WXH6</a> | Ras-related protein Rab-40A OS=Homo sapiens GN=RAB40A PE=2 SV=2                      |

Detailed Results

| Rank | Score | SPI (%) | BCS | # Unmatched Ions | Variable sites | Sequence                                  | MH <sup>+</sup> Calculated (Da) | MH <sup>+</sup> Error (Da) | MH <sup>+</sup> Error (ppm) | Protein MW/pI (Da) | Species | Accession #            | MS-Digest Index #      | Protein Name                                                         |
|------|-------|---------|-----|------------------|----------------|-------------------------------------------|---------------------------------|----------------------------|-----------------------------|--------------------|---------|------------------------|------------------------|----------------------------------------------------------------------|
| 1    | 14.45 | 77.7    | 6   | 9/24             | K334k K341k    | (R) L G E T Q k A M L D P P k P S / R (G) | 1767.9422                       | 228.1000                   | 7.1                         | 51219.0/6.10       | HUMAN   | <a href="#">Q96BH1</a> | <a href="#">319685</a> | E3 ubiquitin-protein ligase RNF25 OS=Homo sapiens GN=RNF25 PE=1 SV=1 |

  

| Fragment-ion (m/z)     | 70.065 | 72.079 | 84.081 | 85.024 | 86.099 | 104.053 | 110.072 | 127.086 | 129.102 | 175.123 | 203.095 | 231.095 | 262.152 | 341.190 <sup>+2</sup> | 349.700 <sup>+2</sup> | 354.159 | 359.205 | 398.224 <sup>+2</sup> | 412.416 | 437.236 <sup>+2</sup> | 521.248 | 601.327 | 698.382 | 795.449 |
|------------------------|--------|--------|--------|--------|--------|---------|---------|---------|---------|---------|---------|---------|---------|-----------------------|-----------------------|---------|---------|-----------------------|---------|-----------------------|---------|---------|---------|---------|
| Frac. Inten.(% of TIC) | 0.01   | 2.65   | 0.50   | 2.44   | 12.71  | 2.10    | 5.60    | 2.17    | 0.06    | 4.44    | 1.66    | 2.07    | 1.71    | 1.99                  | 10.37                 | 2.05    | 5.74    | 23.58                 | 1.70    | 1.77                  | 1.85    | 1.76    | 8.22    | 2.87    |
| Rel. Inten.(% of BP)   | 0.06   | 11.22  | 2.10   | 10.33  | 53.88  | 8.90    | 23.74   | 9.19    | 0.27    | 18.84   | 7.02    | 8.76    | 7.25    | 8.45                  | 43.98                 | 8.69    | 24.33   | 100.00                | 7.20    | 7.50                  | 7.87    | 7.48    | 34.87   | 12.16   |
| Score                  | 0.20   | -0.11  | 0.50   | -0.10  | 0.50   | -0.09   | -0.24   | -0.09   | 0.20    | 1.50    | 0.75    | 1.50    | 0.50    | 0.50                  | 1.50                  | -0.09   | 1.50    | 1.50                  | -0.07   | -0.07                 | -0.08   | 1.50    | 1.50    | 1.50    |
| Ion-type               | PR     |        | KQ     |        | a1     |         |         | RKQ     | y1      | AM      | ET      | y2      | y2      | y5-NH3                | b+++12 <sup>+2</sup>  | y3      |         | y5 <sup>+2</sup>      |         |                       | b+++10  | b+++12  | b+++12  | y6      |
| Delta ppm              | -4.6   |        | -0.9   |        | 24.1   |         |         | 48.4    | -4.2    | 24.8    |         | -12.3   | 3.5     | 5.7                   | 60.5                  |         | 3.2     | -8.8                  |         |                       | 49.4    | 44.6    | 2.8     | 2.8     |
|                        |        |        |        |        | 0.50   |         |         |         |         | ET-28   |         |         |         |                       | y5 <sup>+2</sup>      |         |         |                       |         |                       | y4      | y5      | y5      |         |
|                        |        |        |        |        | 24.1   |         |         |         |         | -39.1   |         |         |         |                       | -2.4                  |         |         |                       |         |                       | ETQk    | 55.5    |         |         |

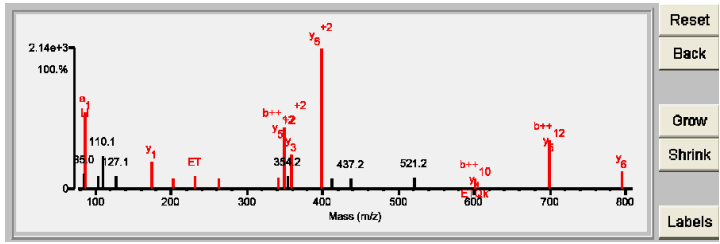

Result Summary

| Rank | Score | SPI (%) | BCS | # Unmatched Ions | Variable sites | Sequence            | MH <sup>+</sup> Calculated (Da) | MH <sup>+</sup> Error (Da) | MH <sup>+</sup> Error (ppm) | Protein MW/pI (Da) | Species | Accession # | Protein Name                                                                   |
|------|-------|---------|-----|------------------|----------------|---------------------|---------------------------------|----------------------------|-----------------------------|--------------------|---------|-------------|--------------------------------------------------------------------------------|
| 1    | 12.33 | 72.9    | 7   | 7/25             | K172k          | (R)YEEIVKEVSTYIK(K) | 1600.8469                       | 114.0515                   | 5.0                         | 50141.1/9.10       | HUMAN   | P68104      | Elongation factor 1-alpha 1 OS=Homo sapiens GN=EEF1A1 PE=1 SV=1                |
| 1    | 12.33 | 72.9    | 7   | 7/25             | K172k          | (R)YEEIVKEVSTYIK(K) | 1600.8469                       | 114.0515                   | 5.0                         | 50185.3/9.15       | HUMAN   | Q5VTE0      | Putative elongation factor 1-alpha-like 3 OS=Homo sapiens GN=EEF1AL3 PE=5 SV=1 |

Detailed Results

| Rank | Score | SPI (%) | BCS | # Unmatched Ions | Variable sites | Sequence            | MH <sup>+</sup> Calculated (Da) | MH <sup>+</sup> Error (Da) | MH <sup>+</sup> Error (ppm) | Protein MW/pI (Da) | Species | Accession # | MS-Digest Index # | Protein Name                                                                   |
|------|-------|---------|-----|------------------|----------------|---------------------|---------------------------------|----------------------------|-----------------------------|--------------------|---------|-------------|-------------------|--------------------------------------------------------------------------------|
| 1    | 12.33 | 72.9    | 7   | 7/25             | K172k          | (R)YEEIVKEVSTYIK(K) | 1600.8469                       | 114.0515                   | 5.0                         | 50141.1/9.10       | HUMAN   | P68104      | 180287            | Elongation factor 1-alpha 1 OS=Homo sapiens GN=EEF1A1 PE=1 SV=1                |
| 1    | 12.33 | 72.9    | 7   | 7/25             | K172k          | (R)YEEIVKEVSTYIK(K) | 1600.8469                       | 114.0515                   | 5.0                         | 50185.3/9.15       | HUMAN   | Q5VTE0      | 180333            | Putative elongation factor 1-alpha-like 3 OS=Homo sapiens GN=EEF1AL3 PE=5 SV=1 |

  

| Fragment-ion (m/z)     | 72.082 | 84.080 | 86.096 | 129.098 | 130.083 | 136.074 | 147.113 | 185.121 | 202.079 | 231.089 | 260.194 | 265.115 | 293.102 | 394.169 | 422.150 | 453.248 | 471.259 | 474.203 | 524.300 | 535.240 <sup>+2</sup> | 541.291 <sup>+2</sup> | 593.326 | 611.351 | 710.404 <sup>+2</sup> | 840.467 |
|------------------------|--------|--------|--------|---------|---------|---------|---------|---------|---------|---------|---------|---------|---------|---------|---------|---------|---------|---------|---------|-----------------------|-----------------------|---------|---------|-----------------------|---------|
| Frac. Inten.(% of TIC) | 0.14   | 0.72   | 0.42   | 0.21    | 3.44    | 0.63    | 4.24    | 3.12    | 3.13    | 3.30    | 3.38    | 10.45   | 7.61    | 3.25    | 10.37   | 3.09    | 4.49    | 3.08    | 4.36    | 3.33                  | 6.52                  | 3.44    | 6.17    | 6.74                  | 4.40    |
| Rel. Inten.(% of BP)   | 1.33   | 6.91   | 3.99   | 1.96    | 32.95   | 6.07    | 40.56   | 29.86   | 29.97   | 31.61   | 32.32   | 100.00  | 72.84   | 31.08   | 99.29   | 29.54   | 42.96   | 29.45   | 41.74   | 31.86                 | 62.40                 | 32.88   | 59.02   | 64.54                 | 42.09   |
| Score                  | 0.50   | 0.50   | 0.22   | 0.20    | 0.50    | 1.00    | 1.50    | -0.30   | -0.30   | -0.32   | 1.50    | 0.75    | 0.50    | 0.50    | 0.50    | 0.50    | 0.75    | -0.29   | 1.50    | -0.32                 | 1.50                  | 0.50    | 1.50    | -0.65                 | -0.42   |
| Ion-type               | V      | KQ     | LI     | RKQ     | y1-NH3  | a1      | y1      |         |         |         | y2      | a2      | b2      | a3      | b3      | kEV-H2O | kEV     |         | y4      |                       | y6 <sup>+2</sup>      | y5-H2O  | y5      |                       |         |
| Delta ppm              | 22.5   | -12.8  | -0.3   | -30.5   | -24.3   | -19.0   | -0.7    |         |         |         | -12.2   | -15.4   | -40.6   | 17.1    | -15.6   | 2.6     | 3.9     |         | -14.8   |                       | -13.0                 | -5.3    | 18.6    |                       |         |

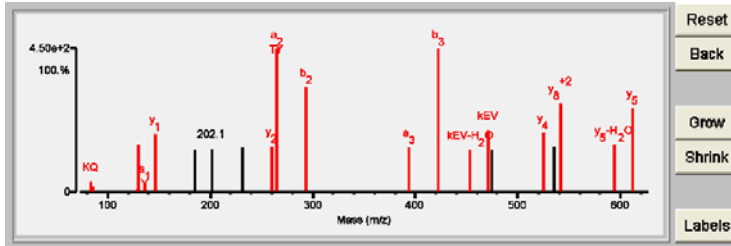



Result Summary

| Rank | Score | SPI (%) | BCS | # Unmatched Ions | Variable sites | Sequence                            | MH <sup>+</sup> Calculated (Da) | MH <sup>+</sup> Error (Da) | MH <sup>+</sup> Error (ppm) | Protein MW/pI (Da) | Species | Accession #            | Protein Name                                                                         |
|------|-------|---------|-----|------------------|----------------|-------------------------------------|---------------------------------|----------------------------|-----------------------------|--------------------|---------|------------------------|--------------------------------------------------------------------------------------|
| 1    | 15.43 | 74.4    | 10  | 11/25            | K244k          | (K)DGNASGTTLLEALDCILPPTTRPTDkPLR(L) | 3021.5674                       | 114.0760                   | 10.6                        | 50141.1/9.10       | HUMAN   | <a href="#">P68104</a> | Elongation factor 1-alpha 1 OS=Homo sapiens GN=EEF1A1 PE=1 SV=1                      |
| 1    | 15.43 | 74.4    | 10  | 11/25            | K244k          | (K)DGNASGTTLLEALDCILPPTTRPTDkPLR(L) | 3021.5674                       | 114.0760                   | 10.6                        | 50185.3/9.15       | HUMAN   | <a href="#">Q5VTE0</a> | Putative elongation factor 1-alpha-like 3 OS=Homo sapiens GN=EEF1AL3 PE=5 SV=1       |
| 2    | 4.95  | 50.2    | 4   | 19/25            | M103m M110m    | (R)GADEQRRSVPFQmLLEKmqDSRQK(A)      | 3103.6139                       | 32.0294                    | 12.6                        | 43011.1/8.04       | HUMAN   | <a href="#">Q9UMW6</a> | Ubl carboxyl-terminal hydrolase 18 OS=Homo sapiens GN=USP18 PE=1 SV=1                |
| 2    | 4.95  | 50.2    | 4   | 19/25            | M103m M110m    | (R)GADEQRRSVPFQmLLEKmqDSRQK(A)      | 3103.6139                       | 32.0294                    | 12.6                        | 41394.4/8.36       | HUMAN   | <a href="#">Q3LFD5</a> | Putative ubiquitin carboxyl-terminal hydrolase 41 OS=Homo sapiens GN=USP41 PE=2 SV=2 |

Detailed Results

| Rank | Score | SPI (%) | BCS | # Unmatched Ions | Variable sites | Sequence                            | MH <sup>+</sup> Calculated (Da) | MH <sup>+</sup> Error (Da) | MH <sup>+</sup> Error (ppm) | Protein MW/pI (Da) | Species | Accession #            | MS-Digest Index #      | Protein Name                                                                   |
|------|-------|---------|-----|------------------|----------------|-------------------------------------|---------------------------------|----------------------------|-----------------------------|--------------------|---------|------------------------|------------------------|--------------------------------------------------------------------------------|
| 1    | 15.43 | 74.4    | 10  | 11/25            | K244k          | (K)DGNASGTTLLEALDCILPPTTRPTDkPLR(L) | 3021.5674                       | 114.0760                   | 10.6                        | 50141.1/9.10       | HUMAN   | <a href="#">P68104</a> | <a href="#">180287</a> | Elongation factor 1-alpha 1 OS=Homo sapiens GN=EEF1A1 PE=1 SV=1                |
| 1    | 15.43 | 74.4    | 10  | 11/25            | K244k          | (K)DGNASGTTLLEALDCILPPTTRPTDkPLR(L) | 3021.5674                       | 114.0760                   | 10.6                        | 50185.3/9.15       | HUMAN   | <a href="#">Q5VTE0</a> | <a href="#">180333</a> | Putative elongation factor 1-alpha-like 3 OS=Homo sapiens GN=EEF1AL3 PE=5 SV=1 |

  

| Fragment-ion (m/z)      | 70.062 | 86.094         | 88.038         | 157.132 | 287.096        | 313.109                           | 400.175 <sup>+2</sup>         | 409.148 | 428.264 | 464.602 <sup>+3</sup>        | 540.787 <sup>+2</sup> | 627.391        | 647.875 <sup>+2</sup>         | 670.350 <sup>+2</sup>         | 696.393 <sup>+2</sup>         | 752.930 <sup>+2</sup>         | 809.474 <sup>+2</sup>         | 877.083        | 889.501 <sup>+2</sup>         | 940.519        | 947.009 <sup>+2</sup>         | 948.970 <sup>+2</sup> | 1004.060 <sup>+2</sup> | 1039.555 <sup>+2</sup> | 1103.590 |
|-------------------------|--------|----------------|----------------|---------|----------------|-----------------------------------|-------------------------------|---------|---------|------------------------------|-----------------------|----------------|-------------------------------|-------------------------------|-------------------------------|-------------------------------|-------------------------------|----------------|-------------------------------|----------------|-------------------------------|-----------------------|------------------------|------------------------|----------|
| Frac. Inten. (% of TIC) | 1.72   | 0.16           | 3.64           | 1.82    | 3.14           | 1.92                              | 1.80                          | 3.21    | 2.23    | 2.06                         | 2.06                  | 2.36           | 2.06                          | 2.29                          | 24.67                         | 11.74                         | 5.97                          | 3.82           | 6.65                          | 1.89           | 5.30                          | 1.74                  | 2.31                   | 2.47                   | 2.96     |
| Rel. Inten. (% of BP)   | 6.99   | 0.65           | 14.75          | 7.37    | 12.72          | 7.76                              | 7.32                          | 13.02   | 9.03    | 8.36                         | 8.36                  | 9.58           | 8.35                          | 9.28                          | 100.00                        | 47.60                         | 24.22                         | 15.48          | 26.98                         | 7.65           | 21.49                         | 7.05                  | 9.37                   | 10.03                  | 12.01    |
| Score                   | -0.07  | 0.22           | 0.50           | -0.07   | 0.50           | -0.08                             | 0.25                          | -0.13   | -0.09   | 1.50                         | -0.08                 | 1.50           | 1.50                          | -0.09                         | 1.50                          | 1.50                          | 1.50                          | -0.15          | 1.50                          | 1.50           | 1.50                          | -0.07                 | -0.09                  | -0.10                  | 1.50     |
| Ion-type                | LI     | a <sub>1</sub> | b <sub>3</sub> |         | b <sub>3</sub> | bg-H <sub>2</sub> O <sup>+2</sup> | y <sub>11</sub> <sup>+3</sup> |         |         | y <sub>1</sub> <sup>+3</sup> |                       | y <sub>4</sub> | y <sub>10</sub> <sup>+2</sup> | y <sub>11</sub> <sup>+2</sup> | y <sub>12</sub> <sup>+2</sup> | y <sub>13</sub> <sup>+2</sup> | y <sub>14</sub> <sup>+2</sup> | y <sub>7</sub> | y <sub>14</sub> <sup>+2</sup> | y <sub>7</sub> | y <sub>15</sub> <sup>+2</sup> |                       |                        | y <sup>+18</sup>       |          |
| Delta ppm               |        | -25.9          | -28.4          |         | -14.0          |                                   | -20.3                         |         |         | 10.7                         |                       | -4.4           | 14.9                          |                               |                               | 2.0                           | -4.6                          | -1.2           |                               | 11.6           | -2.7                          | 4.8                   |                        |                        | 3.4      |

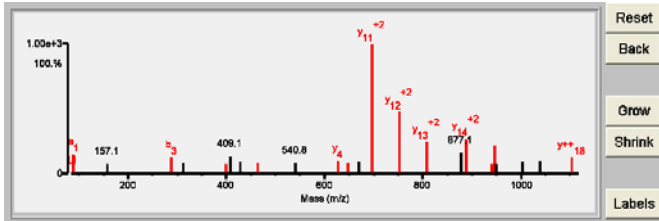

Result Summary

| Rank | Score | SPI (%) | BCS | # Unmatched Ions | Variable sites | Sequence                   | MH <sup>+</sup> Calculated (Da) | MH <sup>+</sup> Error (Da) | MH <sup>+</sup> Error (ppm) | Protein MW/pi (Da) | Species | Accession # | Protein Name                                                                   |
|------|-------|---------|-----|------------------|----------------|----------------------------|---------------------------------|----------------------------|-----------------------------|--------------------|---------|-------------|--------------------------------------------------------------------------------|
| 1    | 14.91 | 77.9    | 9   | 7/25             | K255k          | (R)LPQLQDVYKIGGIGTVPVGR(V) | 1982.1433                       | 114.0484                   | 2.6                         | 50141.1/9.10       | HUMAN   | P68104      | Elongation factor 1-alpha 1 OS=Homo sapiens GN=EEF1A1 PE=1 SV=1                |
| 1    | 14.91 | 77.9    | 9   | 7/25             | K255k          | (R)LPQLQDVYKIGGIGTVPVGR(V) | 1982.1433                       | 114.0484                   | 2.6                         | 50470.4/9.11       | HUMAN   | Q05639      | Elongation factor 1-alpha 2 OS=Homo sapiens GN=EEF1A2 PE=1 SV=1                |
| 1    | 14.91 | 77.9    | 9   | 7/25             | K255k          | (R)LPQLQDVYKIGGIGTVPVGR(V) | 1982.1433                       | 114.0484                   | 2.6                         | 50185.3/9.15       | HUMAN   | Q5VTE0      | Putative elongation factor 1-alpha-like 3 OS=Homo sapiens GN=EEF1AL3 PE=5 SV=1 |

Detailed Results

| Rank | Score | SPI (%) | BCS | # Unmatched Ions | Variable sites | Sequence                   | MH <sup>+</sup> Calculated (Da) | MH <sup>+</sup> Error (Da) | MH <sup>+</sup> Error (ppm) | Protein MW/pi (Da) | Species | Accession # | MS-Digest Index # | Protein Name                                                                   |
|------|-------|---------|-----|------------------|----------------|----------------------------|---------------------------------|----------------------------|-----------------------------|--------------------|---------|-------------|-------------------|--------------------------------------------------------------------------------|
| 1    | 14.91 | 77.9    | 9   | 7/25             | K255k          | (R)LPQLQDVYKIGGIGTVPVGR(V) | 1982.1433                       | 114.0484                   | 2.6                         | 50141.1/9.10       | HUMAN   | P68104      | 180287            | Elongation factor 1-alpha 1 OS=Homo sapiens GN=EEF1A1 PE=1 SV=1                |
| 1    | 14.91 | 77.9    | 9   | 7/25             | K255k          | (R)LPQLQDVYKIGGIGTVPVGR(V) | 1982.1433                       | 114.0484                   | 2.6                         | 50470.4/9.11       | HUMAN   | Q05639      | 180317            | Elongation factor 1-alpha 2 OS=Homo sapiens GN=EEF1A2 PE=1 SV=1                |
| 1    | 14.91 | 77.9    | 9   | 7/25             | K255k          | (R)LPQLQDVYKIGGIGTVPVGR(V) | 1982.1433                       | 114.0484                   | 2.6                         | 50185.3/9.15       | HUMAN   | Q5VTE0      | 180333            | Putative elongation factor 1-alpha-like 3 OS=Homo sapiens GN=EEF1AL3 PE=5 SV=1 |

| Fragment-ion (m/z)     | 70.065 | 84.081 | 86.096 | 183.106 | 211.141 | 212.144 | 344.183 | 356.224 | 406.207 | 410.263 | 428.253 | 504.292 <sup>+2</sup>              | 578.847 <sup>+2</sup> | 583.355 | 619.311 | 628.362 | 634.376 <sup>+2</sup> | 655.366 <sup>+3</sup> | 666.394 | 685.397 | 692.402 | 798.501 | 846.469 | 855.508 | 912.526 |
|------------------------|--------|--------|--------|---------|---------|---------|---------|---------|---------|---------|---------|------------------------------------|-----------------------|---------|---------|---------|-----------------------|-----------------------|---------|---------|---------|---------|---------|---------|---------|
| Frac. Inten.(% of TIC) | 0.00   | 0.24   | 6.02   | 3.02    | 3.34    | 2.52    | 2.72    | 3.59    | 3.06    | 2.73    | 6.12    | 2.55                               | 3.56                  | 2.50    | 3.28    | 3.68    | 3.04                  | 5.45                  | 4.51    | 9.88    | 2.71    | 5.58    | 2.91    | 6.17    | 10.82   |
| Rel. Inten.(% of BP)   | 0.03   | 2.17   | 55.66  | 27.93   | 30.85   | 23.25   | 25.13   | 33.13   | 28.25   | 25.20   | 56.59   | 23.59                              | 32.93                 | 23.10   | 30.31   | 33.99   | 28.09                 | 50.40                 | 41.67   | 91.25   | 25.04   | 51.55   | 26.92   | 56.89   | 100.00  |
| Score                  | 0.20   | 0.50   | 0.50   | -0.28   | 0.75    | -0.23   | -0.25   | 0.75    | 0.75    | -0.25   | 1.50    | 0.50                               | 0.50                  | 0.75    | 1.50    | 1.50    | -0.50                 | 0.50                  | 1.50    | 1.50    | -0.25   | 1.50    | -0.27   | 1.50    | 1.50    |
| Ion-type               | PR     | KQ     | a1     |         | b2      |         |         | kl      | Yk      |         | y4      | y11-H <sub>2</sub> O <sup>+2</sup> | ag <sup>+2</sup>      | kIGGI   | LQDVY   | ys      | y12 <sup>+2</sup>     | bs                    | y7      |         | y8      |         | y9      | y10     |         |
| Delta ppm              | -3.2   | -2.1   | -15.4  |         | -18.5   |         |         | -17.2   | -5.4    |         | -21.2   | -23.1                              | 11.9                  | -4.3    | 1.3     | -24.8   | -2.2                  | 16.1                  | -3.1    |         | 22.9    |         | 3.6     | -0.4    |         |

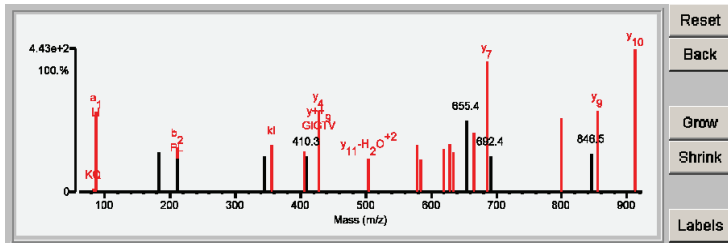

Reset

Back

Grow

Shrink

Labels

Result Summary

| Rank | Score | SP1 (%) | BCS | # Unmatched Ions | Variable sites | Sequence                         | MH <sup>+</sup> Calculated (Da) | MH <sup>+</sup> Error (Da) | MH <sup>+</sup> Error (ppm) | Protein MW/pI (Da) | Species | Accession # | Protein Name                                                                  |
|------|-------|---------|-----|------------------|----------------|----------------------------------|---------------------------------|----------------------------|-----------------------------|--------------------|---------|-------------|-------------------------------------------------------------------------------|
| 1    | 13.04 | 71.2    | 7   | 9/25             | K273k          | (R)YETGV LKPGMVVTFAPVNVITTEVK(S) | 2515.3840                       | 114.0586                   | 6.0                         | 50141.1/9.10       | HUMAN   | P68104      | Elongation factor 1-alpha 1 OS=Homo sapiens GN=EEF1A1 PE=1 SV=1               |
| 1    | 13.04 | 71.2    | 7   | 9/25             | K273k          | (R)YETGV LKPGMVVTFAPVNVITTEVK(S) | 2515.3840                       | 114.0586                   | 6.0                         | 50185.3/9.15       | HUMAN   | Q5VTE0      | Putative elongation factor 1-alpha-like 3 OS=Homo sapiens GN=EEF1A3 PE=5 SV=1 |

Detailed Results

| Rank | Score | SP1 (%) | BCS | # Unmatched Ions | Variable sites | Sequence                         | MH <sup>+</sup> Calculated (Da) | MH <sup>+</sup> Error (Da) | MH <sup>+</sup> Error (ppm) | Protein MW/pI (Da) | Species | Accession # | MS-Digest Index # | Protein Name                                                                  |
|------|-------|---------|-----|------------------|----------------|----------------------------------|---------------------------------|----------------------------|-----------------------------|--------------------|---------|-------------|-------------------|-------------------------------------------------------------------------------|
| 1    | 13.04 | 71.2    | 7   | 9/25             | K273k          | (R)YETGV LKPGMVVTFAPVNVITTEVK(S) | 2515.3840                       | 114.0586                   | 6.0                         | 50141.1/9.10       | HUMAN   | P68104      | 180287            | Elongation factor 1-alpha 1 OS=Homo sapiens GN=EEF1A1 PE=1 SV=1               |
| 1    | 13.04 | 71.2    | 7   | 9/25             | K273k          | (R)YETGV LKPGMVVTFAPVNVITTEVK(S) | 2515.3840                       | 114.0586                   | 6.0                         | 50185.3/9.15       | HUMAN   | Q5VTE0      | 180333            | Putative elongation factor 1-alpha-like 3 OS=Homo sapiens GN=EEF1A3 PE=5 SV=1 |

  

| Fragment-ion (m/z)      | 70.062         | 72.080 | 86.097 | 187.145 | 201.119        | 215.135 | 229.118        | 340.213 | 385.190  | 456.260 | 484.255                      | 493.783 <sup>+2</sup> | 511.257 | 528.257                       | 599.332 <sup>+2</sup> | 714.378 | 790.420 | 825.623 <sup>+3</sup> | 841.481        | 900.465 <sup>+2</sup> | 986.549 | 987.690 | 1057.578 | 1204.639 | 1305.683 |
|-------------------------|----------------|--------|--------|---------|----------------|---------|----------------|---------|----------|---------|------------------------------|-----------------------|---------|-------------------------------|-----------------------|---------|---------|-----------------------|----------------|-----------------------|---------|---------|----------|----------|----------|
| Frac. Inten. (% of TIC) | 2.45           | 0.16   | 0.11   | 4.53    | 2.98           | 3.42    | 5.10           | 5.33    | 3.44     | 2.76    | 4.97                         | 6.88                  | 3.72    | 2.50                          | 2.76                  | 2.61    | 2.75    | 2.47                  | 5.13           | 3.13                  | 15.67   | 2.64    | 6.82     | 3.93     | 3.73     |
| Rel. Inten. (% of BP)   | 15.62          | 1.01   | 0.69   | 28.89   | 19.02          | 21.84   | 32.53          | 34.00   | 21.98    | 17.62   | 31.70                        | 43.91                 | 23.74   | 15.92                         | 17.63                 | 16.65   | 17.55   | 15.73                 | 32.75          | 20.00                 | 100.00  | 16.82   | 43.54    | 25.07    | 23.78    |
| Score                   | -0.16          | 0.50   | 0.22   | -0.29   | 0.75           | -0.22   | 0.75           | -0.34   | 0.75     | 0.50    | 0.75                         | 1.50                  | -0.24   | 0.75                          | 0.50                  | -0.17   | 1.50    | -0.16                 | 0.50           | -0.20                 | 1.50    | -0.17   | 1.50     | 1.50     | 1.50     |
| Ion-type                | a <sub>1</sub> | LI     |        |         | a <sub>2</sub> |         | b <sub>2</sub> | PGMV    | PGMVV-28 | PGMVV   | y <sub>9</sub> <sup>+2</sup> |                       | kPGM    | a <sub>11</sub> <sup>+2</sup> |                       |         |         |                       | b <sub>7</sub> | y <sub>9</sub>        |         |         |          |          |          |
| Delta ppm               |                | -20.4  | 0.50   | 4.3     | -29.7          |         | -5.6           |         | -4.9     | -11.4   | -9.3                         | 6.1                   |         | -7.0                          | -8.8                  |         |         |                       | 2.9            | -2.4                  |         |         |          |          |          |

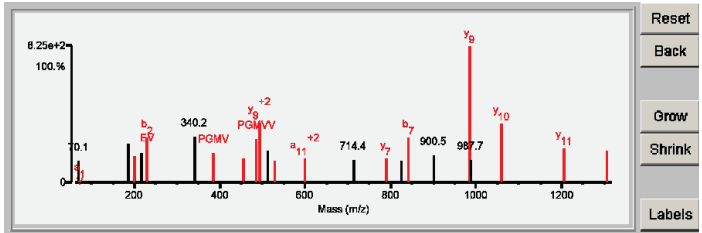

Result Summary

| Rank | Score | SPI (%) | BCS | # Unmatched Ions | Variable sites | Sequence                        | MH <sup>+</sup> Calculated (Da) | MH <sup>+</sup> Error (Da) | MH <sup>+</sup> Error (ppm) | Protein MW/pl (Da) | Species | Accession # | Protein Name                                                 |
|------|-------|---------|-----|------------------|----------------|---------------------------------|---------------------------------|----------------------------|-----------------------------|--------------------|---------|-------------|--------------------------------------------------------------|
| 1    | 14.09 | 71.7    | 8   | 10/25            | K147k          | (R) I L/G/L/L/D A Y/L/K/T/R (T) | 1375.8308                       | 114.0550                   | 8.1                         | 50119.1/6.25       | HUMAN   | P26641      | Elongation factor 1-gamma OS=Homo sapiens GN=EEF1G PE=1 SV=3 |

Detailed Results

| Rank | Score | SPI (%) | BCS | # Unmatched Ions | Variable sites | Sequence                        | MH <sup>+</sup> Calculated (Da) | MH <sup>+</sup> Error (Da) | MH <sup>+</sup> Error (ppm) | Protein MW/pl (Da) | Species | Accession # | MS-Digest Index # | Protein Name                                                 |
|------|-------|---------|-----|------------------|----------------|---------------------------------|---------------------------------|----------------------------|-----------------------------|--------------------|---------|-------------|-------------------|--------------------------------------------------------------|
| 1    | 14.09 | 71.7    | 8   | 10/25            | K147k          | (R) I L/G/L/L/D A Y/L/K/T/R (T) | 1375.8308                       | 114.0550                   | 8.1                         | 50119.1/6.25       | HUMAN   | P26641      | 180797            | Elongation factor 1-gamma OS=Homo sapiens GN=EEF1G PE=1 SV=3 |

  

| Fragment-ion (m/z)      | 70.066 | 72.084 | 84.081 | 86.095         | 87.100 | 89.059 | 129.102 | 136.073 | 143.115 | 171.106 | 175.119        | 199.179        | 228.179 | 229.131 | 276.161        | 284.194        | 369.287        | 399.218 <sup>+2</sup> | 457.297 | 512.308        | 518.310        | 631.385 | 632.375 <sup>+2</sup>         | 980.522        | 1093.585       |
|-------------------------|--------|--------|--------|----------------|--------|--------|---------|---------|---------|---------|----------------|----------------|---------|---------|----------------|----------------|----------------|-----------------------|---------|----------------|----------------|---------|-------------------------------|----------------|----------------|
| Frac. Inten. (% of TIC) | 0.00   | 1.65   | 7.12   | 34.75          | 2.48   | 1.99   | 0.06    | 0.21    | 3.91    | 1.71    | 1.83           | 4.26           | 3.90    | 1.73    | 3.37           | 4.59           | 2.14           | 2.10                  | 1.69    | 2.38           | 6.79           | 3.41    | 3.09                          | 2.81           | 2.03           |
| Rel. Inten. (% of BP)   | 0.01   | 4.76   | 20.47  | 100.00         | 7.14   | 5.73   | 0.17    | 0.61    | 11.26   | 4.93    | 5.28           | 12.26          | 11.21   | 4.98    | 9.69           | 13.22          | 6.16           | 6.04                  | 4.86    | 6.84           | 19.52          | 9.82    | 8.89                          | 8.08           | 5.83           |
| Score                   | 0.20   | -0.05  | -0.20  | 0.50           | -0.07  | -0.06  | 0.20    | 1.00    | -0.11   | -0.05   | 1.50           | 0.50           | -0.11   | -0.05   | 1.50           | 0.75           | 0.50           | -0.06                 | -0.05   | 0.75           | 1.50           | 1.50    | 1.50                          | 1.50           | 1.50           |
| Ion-type                | PR     |        |        | a <sub>1</sub> |        |        | RKQ     | Y       |         |         | y <sub>1</sub> | a <sub>2</sub> |         |         | y <sub>2</sub> | b <sub>3</sub> | a <sub>4</sub> |                       | LGLLD   | y <sub>3</sub> | y <sub>4</sub> |         | y <sub>10</sub> <sup>+2</sup> | y <sub>7</sub> | y <sub>8</sub> |
| Delta ppm               | 16.8   |        |        | -28.1          |        |        | 1.2     | -19.8   |         |         | -0.3           | -14.5          |         |         | -21.1          | -15.0          | -0.9           |                       | -0.9    | 10.2           | -5.5           |         | 29.2                          | 6.3            | -13.8          |

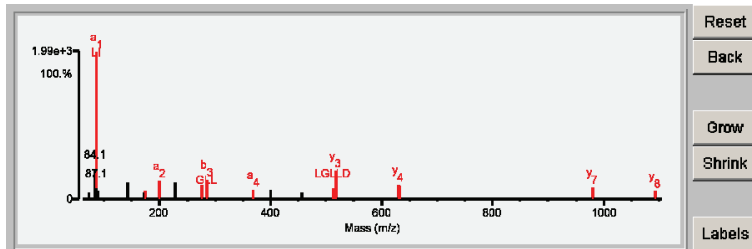

Result Summary

| Rank | Score | SPI (%) | BCS | # Unmatched Ions | Variable sites | Sequence             | MH <sup>+</sup> Calculated (Da) | MH <sup>+</sup> Error (Da) | MH <sup>+</sup> Error (ppm) | Protein MW/pI (Da) | Species | Accession # | Protein Name                                          |
|------|-------|---------|-----|------------------|----------------|----------------------|---------------------------------|----------------------------|-----------------------------|--------------------|---------|-------------|-------------------------------------------------------|
| 1    | 15.38 | 73.7    | 7   | 8/24             | K239k          | (K)FAAkGEGQLGPAER(A) | 1430.7387                       | 114.0549                   | 7.7                         | 95338.7/6.41       | HUMAN   | P13639      | Elongation factor 2 OS=Homo sapiens GN=EEF2 PE=1 SV=4 |

Detailed Results

| Rank                    | Score | SPI (%) | BCS    | # Unmatched Ions | Variable sites | Sequence                                         | MH <sup>+</sup> Calculated (Da) | MH <sup>+</sup> Error (Da) | MH <sup>+</sup> Error (ppm) | Protein MW/pI (Da) | Species | Accession # | MS-Digest Index # | Protein Name                                          |         |           |         |         |         |         |         |           |         |         |          |
|-------------------------|-------|---------|--------|------------------|----------------|--------------------------------------------------|---------------------------------|----------------------------|-----------------------------|--------------------|---------|-------------|-------------------|-------------------------------------------------------|---------|-----------|---------|---------|---------|---------|---------|-----------|---------|---------|----------|
| 1                       | 15.38 | 73.7    | 7      | 8/24             | K239k          | (K) F A \A k / G E G Q I L / G / P / A E / R (A) | 1430.7387                       | 114.0549                   | 7.7                         | 95338.7/6.41       | HUMAN   | P13639      | 180869            | Elongation factor 2 OS=Homo sapiens GN=EEF2 PE=1 SV=4 |         |           |         |         |         |         |         |           |         |         |          |
| Fragment-ion (m/z)      |       | 84.042  | 84.079 | 86.097           | 120.080        | 141.104                                          | 175.118                         | 186.084                    | 187.068                     | 191.110            | 219.119 | 236.632     | 271.134           | 316.215                                               | 321.666 | 339.681*2 | 375.208 | 424.217 | 472.250 | 529.273 | 642.362 | 664.361*2 | 685.333 | 903.462 | 1013.471 |
| Frac. Inten. (% of TIC) |       | 0.15    | 0.61   | 0.26             | 0.52           | 3.45                                             | 4.13                            | 5.20                       | 6.79                        | 2.66               | 3.41    | 5.36        | 3.78              | 3.47                                                  | 3.24    | 2.92      | 4.08    | 2.85    | 3.95    | 16.54   | 12.98   | 3.89      | 2.72    | 3.83    | 3.32     |
| Rel. Inten. (% of BP)   |       | 0.93    | 3.67   | 1.56             | 3.13           | 20.88                                            | 24.96                           | 31.42                      | 41.07                       | 16.08              | 20.60   | 32.42       | 22.85             | 20.97                                                 | 19.58   | 17.64     | 24.68   | 17.22   | 23.29   | 100.00  | 78.51   | 23.54     | 16.42   | 23.13   | 20.05    |
| Score                   |       | 1.00    | 0.50   | 0.22             | 1.00           | -0.21                                            | 1.50                            | 0.75                       | 0.75                        | -0.16              | 0.50    | 1.50        | -0.23             | -0.21                                                 | -0.20   | -0.18     | 1.50    | -0.17   | 1.50    | 1.50    | 1.50    | -0.24     | 0.75    | 0.50    | 1.50     |
| Ion-type                |       | E       | KQ     | LI               | a1             |                                                  | y1                              | GQ                         | EG                          |                    | b2      | y*+4        |                   |                                                       |         |           | y3      | y4      | y5      | y6      |         | AkGEGQ    | b8      | y10     |          |
| Delta ppm               |       | -24.9   | -21.1  | 2.0              | -17.3          |                                                  | -6.0                            | -25.3                      | -25.3                       |                    | 24.6    | 13.3        |                   |                                                       |         |           | 25.2    | -2.0    | -0.5    | 8.0     |         | 7.9       | 31.9    | -30.0   |          |

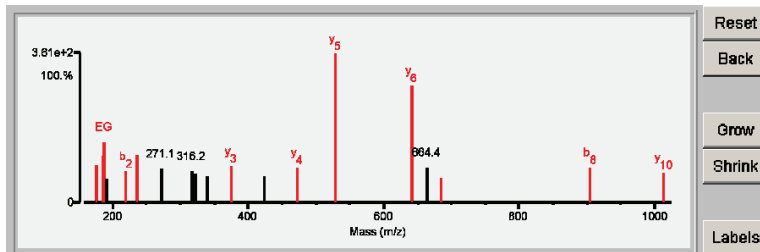

Result Summary

| Rank | Score | SPI (%) | BCS | # Unmatched Ions | Variable sites | Sequence                             | MH <sup>+</sup> Calculated (Da) | MH <sup>+</sup> Error (Da) | MH <sup>+</sup> Error (ppm) | Protein MW/pl (Da) | Species | Accession # | Protein Name                                          |
|------|-------|---------|-----|------------------|----------------|--------------------------------------|---------------------------------|----------------------------|-----------------------------|--------------------|---------|-------------|-------------------------------------------------------|
| 1    | 17.65 | 77.4    | 10  | 6/25             | K42k           | (K)STLTD <del>SLVCK</del> AGIASAR(A) | 1863.0004                       | 114.0574                   | 7.3                         | 95338.7/6.41       | HUMAN   | P13639      | Elongation factor 2 OS=Homo sapiens GN=EEF2 PE=1 SV=4 |

Detailed Results

| Rank                   | Score | SPI (%) | BCS    | # Unmatched Ions | Variable sites | Sequence                                   | MH <sup>+</sup> Calculated (Da) | MH <sup>+</sup> Error (Da) | MH <sup>+</sup> Error (ppm) | Protein MW/pl (Da) | Species                          | Accession #                     | MS-Digest Index # | Protein Name                                          |                |         |                |         |                               |                       |                |                               |                |                               |                               |                 |      |
|------------------------|-------|---------|--------|------------------|----------------|--------------------------------------------|---------------------------------|----------------------------|-----------------------------|--------------------|----------------------------------|---------------------------------|-------------------|-------------------------------------------------------|----------------|---------|----------------|---------|-------------------------------|-----------------------|----------------|-------------------------------|----------------|-------------------------------|-------------------------------|-----------------|------|
| 1                      | 17.65 | 77.4    | 10     | 6/25             | K42k           | (K)S T L T D S L V C K A G I I A S A R (A) | 1863.0004                       | 114.0574                   | 7.3                         | 95338.7/6.41       | HUMAN                            | P13639                          | 180869            | Elongation factor 2 OS=Homo sapiens GN=EEF2 PE=1 SV=4 |                |         |                |         |                               |                       |                |                               |                |                               |                               |                 |      |
| Fragment-ion (m/z)     |       | 70.064  | 84.081 | 86.097           | 116.068        | 120.080                                    | 161.091                         | 171.079                    | 175.120                     | 187.142            | 189.085                          | 284.161                         | 316.152           | 333.183                                               | 341.220        | 404.227 | 474.211        | 517.314 | 580.815 <sup>+2</sup>         | 630.376 <sup>+2</sup> | 687.417        | 730.423 <sup>+2</sup>         | 758.452        | 838.452 <sup>+2</sup>         | 894.985 <sup>+2</sup>         | 1160.628        |      |
| Frac. Inten.(% of TIC) |       | 0.00    | 5.16   | 0.66             | 3.57           | 2.32                                       | 2.90                            | 2.04                       | 2.96                        | 5.51               | 4.47                             | 3.93                            | 2.04              | 2.55                                                  | 2.26           | 5.29    | 2.02           | 6.80    | 4.08                          | 3.81                  | 9.97           | 3.33                          | 8.18           | 6.86                          | 5.41                          | 3.88            |      |
| Rel. Inten.(% of BP)   |       | 0.03    | 51.77  | 6.63             | 35.77          | 23.27                                      | 29.13                           | 20.51                      | 29.70                       | 55.28              | 44.81                            | 39.39                           | 20.43             | 25.60                                                 | 22.65          | 53.05   | 20.26          | 68.16   | 40.89                         | 38.20                 | 100.00         | 33.39                         | 82.06          | 68.79                         | 54.24                         | 38.91           |      |
| Score                  |       | 0.20    | -0.52  | 0.22             | -0.36          | -0.23                                      | 0.50                            | 0.25                       | 1.50                        | -0.55              | 0.50                             | 0.25                            | 0.75              | 1.50                                                  | -0.23          | 1.50    | 0.75           | 1.50    | 1.50                          | -0.38                 | 1.50           | 1.50                          | 1.50           | 1.50                          | 1.50                          | 1.50            | 1.50 |
| Ion-type               |       | PR      | LI     | LI               | a <sub>2</sub> | b <sub>2</sub> -H <sub>2</sub> O           | y <sub>1</sub>                  |                            |                             | b <sub>2</sub>     | b <sub>3</sub> -H <sub>2</sub> O | y <sub>3</sub> -NH <sub>3</sub> | y <sub>3</sub>    |                                                       | y <sub>4</sub> | CkA     | y <sub>5</sub> |         | y <sub>10</sub> <sup>+2</sup> |                       | y <sub>7</sub> | y <sub>13</sub> <sup>+2</sup> | y <sub>8</sub> | y <sub>15</sub> <sup>+2</sup> | y <sub>16</sub> <sup>+2</sup> | y <sub>10</sub> |      |
| Delta ppm              |       | -10.4   |        | 5.5              |                |                                            | -15.9                           | 7.5                        |                             | 4.8                |                                  | -14.2                           | -2.7              | -15.3                                                 |                | 3.4     |                | 10.1    | 2.6                           |                       | 3.8            | 23.8                          | 0.2            | 9.6                           | -0.2                          | 6.1             |      |

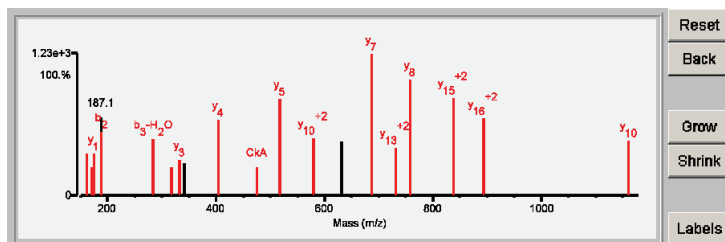

Result Summary

| Rank | Score | SPI (%) | BCS | # Unmatched Ions | Variable sites | Sequence               | MH <sup>+</sup> Calculated (Da) | MH <sup>+</sup> Error (Da) | MH <sup>+</sup> Error (ppm) | Protein MW/pt (Da) | Species | Accession # | Protein Name                                          |
|------|-------|---------|-----|------------------|----------------|------------------------|---------------------------------|----------------------------|-----------------------------|--------------------|---------|-------------|-------------------------------------------------------|
| 1    | 14.58 | 71.4    | 8   | 7/25             | K845k          | (K)GLKEGIPALDNFLDKL(-) | 1742.9687                       | 114.0570                   | 7.6                         | 95338.7/6.41       | HUMAN   | P13639      | Elongation factor 2 OS=Homo sapiens GN=EEF2 PE=1 SV=4 |

Detailed Results

| Rank | Score | SPI (%) | BCS | # Unmatched Ions | Variable sites | Sequence                           | MH <sup>+</sup> Calculated (Da) | MH <sup>+</sup> Error (Da) | MH <sup>+</sup> Error (ppm) | Protein MW/pt (Da) | Species | Accession # | MS-Digest Index # | Protein Name                                          |
|------|-------|---------|-----|------------------|----------------|------------------------------------|---------------------------------|----------------------------|-----------------------------|--------------------|---------|-------------|-------------------|-------------------------------------------------------|
| 1    | 14.58 | 71.4    | 8   | 7/25             | K845k          | (K)G L L R P A L D N F L D K L (-) | 1742.9687                       | 114.0570                   | 7.6                         | 95338.7/6.41       | HUMAN   | P13639      | 180869            | Elongation factor 2 OS=Homo sapiens GN=EEF2 PE=1 SV=4 |

  

| Fragment-ion (m/z)     | 70.064 | 84.079 | 86.096 | 129.101 | 141.101 | 169.090 | 226.116 | 260.193        | 342.714 <sup>+2</sup>        | 375.223        | 391.244 <sup>+2</sup>        | 397.202 | 411.206 | 446.211        | 488.308        | 542.293                       | 573.308 <sup>+2</sup>            | 694.399        | 712.404 | 748.436        | 864.427 | 886.429        | 977.530        | 1048.586        | 1145.597 |
|------------------------|--------|--------|--------|---------|---------|---------|---------|----------------|------------------------------|----------------|------------------------------|---------|---------|----------------|----------------|-------------------------------|----------------------------------|----------------|---------|----------------|---------|----------------|----------------|-----------------|----------|
| Frac. Inten.(% of TIC) | 0.01   | 0.14   | 0.58   | 0.17    | 4.84    | 4.44    | 4.19    | 3.59           | 3.34                         | 3.41           | 4.38                         | 2.83    | 4.34    | 2.92           | 3.30           | 6.28                          | 15.96                            | 2.86           | 6.36    | 4.82           | 5.23    | 3.03           | 6.36           | 3.12            | 3.52     |
| Rel. Inten.(% of BP)   | 0.06   | 0.86   | 3.61   | 1.09    | 30.29   | 27.82   | 26.23   | 22.48          | 20.93                        | 21.36          | 27.45                        | 17.74   | 27.16   | 18.28          | 20.68          | 39.31                         | 100.00                           | 17.93          | 39.81   | 30.21          | 32.76   | 18.97          | 39.81          | 19.54           | 22.04    |
| Score                  | 0.20   | 0.50   | 0.22   | 0.20    | -0.30   | -0.28   | -0.26   | 1.50           | 0.50                         | 1.50           | 0.50                         | 0.75    | -0.27   | -0.18          | 1.50           | 0.75                          | 1.50                             | 0.25           | 0.50    | -0.30          | 1.50    | -0.19          | 1.50           | 1.50            | 1.50     |
| Ion-type               | PR     | KQ     | LI     | RKQ     |         |         |         | y <sub>2</sub> | a <sub>6</sub> <sup>+2</sup> | y <sub>3</sub> | a <sub>7</sub> <sup>+2</sup> | PALD    |         | y <sub>4</sub> | b <sub>4</sub> | y <sub>10</sub> <sup>+2</sup> | b <sub>6</sub> -H <sub>2</sub> O | b <sub>6</sub> |         | y <sub>7</sub> |         | y <sub>8</sub> | y <sub>9</sub> | y <sub>10</sub> |          |
| Delta ppm              | -20.3  | -17.5  | -6.1   | -11.9   |         |         |         | -16.0          | 22.4                         | -1.6           | 30.2                         | -17.8   |         | -0.6           | -2.4           | KEGI                          | -9.6                             | 14.6           | 5.0     | -22.3          |         | -0.2           | 17.6           | -20.1           |          |

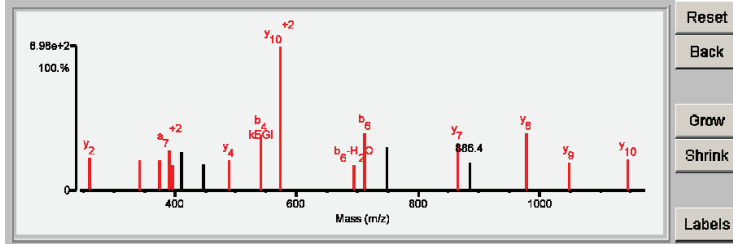

Result Summary

| Rank | Score | SPI (%) | BCS | # Unmatched Ions | Variable sites | Sequence                  | MH <sup>+</sup> Calculated (Da) | MH <sup>+</sup> Error (Da) | MH <sup>+</sup> Error (ppm) | Protein MW/pI (Da) | Species | Accession # | Protein Name                                                          |
|------|-------|---------|-----|------------------|----------------|---------------------------|---------------------------------|----------------------------|-----------------------------|--------------------|---------|-------------|-----------------------------------------------------------------------|
| 1    | 12.86 | 65.3    | 8   | 10/25            | K256K          | (R)DLEKPFLLPVEAVYSVPGR(G) | 2129.1641                       | 114.0525                   | 4.3                         | 49541.87.26        | HUMAN   | P49411      | Elongation factor Tu, mitochondrial OS=Homo sapiens GN=TUFM PE=1 SV=2 |

Detailed Results

| Rank                                                                                                                                                                                                                                                                                                                                                                                                                                                                                                                                                                                                                                                                                                                                                                                                                                                                                                                                                                                                                                                                                                                                                                                                                                                                                                                                                                                                                                                                                                                                                                                                                                                                                                                                                                                                                                                                                                                                                                                                                                                                                                                                                                                                                                                                                                                                                                                                                                                                                                    | Score  | SPI (%) | BCS     | # Unmatched Ions | Variable sites | Sequence                  | MH <sup>+</sup> Calculated (Da) | MH <sup>+</sup> Error (Da) | MH <sup>+</sup> Error (ppm) | Protein MW/pI (Da) | Species | Accession # | MS-Digest Index # | Protein Name                                                          |                    |         |         |         |         |         |         |         |          |          |          |         |         |         |                       |         |         |         |         |         |         |         |         |          |          |          |                        |      |      |      |      |      |      |      |      |      |      |      |      |      |      |      |      |      |       |      |      |      |      |      |      |      |                      |      |       |      |       |       |       |       |       |       |       |       |       |       |       |       |       |       |        |       |       |       |       |       |       |       |       |      |       |      |       |      |       |      |      |      |      |      |       |       |       |      |       |       |      |       |      |      |       |      |      |      |          |    |   |   |    |     |    |     |      |    |    |    |    |    |    |    |    |    |    |    |    |    |    |    |    |    |           |       |       |  |      |  |  |       |      |      |     |      |  |  |      |  |  |  |      |  |     |       |  |      |     |      |
|---------------------------------------------------------------------------------------------------------------------------------------------------------------------------------------------------------------------------------------------------------------------------------------------------------------------------------------------------------------------------------------------------------------------------------------------------------------------------------------------------------------------------------------------------------------------------------------------------------------------------------------------------------------------------------------------------------------------------------------------------------------------------------------------------------------------------------------------------------------------------------------------------------------------------------------------------------------------------------------------------------------------------------------------------------------------------------------------------------------------------------------------------------------------------------------------------------------------------------------------------------------------------------------------------------------------------------------------------------------------------------------------------------------------------------------------------------------------------------------------------------------------------------------------------------------------------------------------------------------------------------------------------------------------------------------------------------------------------------------------------------------------------------------------------------------------------------------------------------------------------------------------------------------------------------------------------------------------------------------------------------------------------------------------------------------------------------------------------------------------------------------------------------------------------------------------------------------------------------------------------------------------------------------------------------------------------------------------------------------------------------------------------------------------------------------------------------------------------------------------------------|--------|---------|---------|------------------|----------------|---------------------------|---------------------------------|----------------------------|-----------------------------|--------------------|---------|-------------|-------------------|-----------------------------------------------------------------------|--------------------|---------|---------|---------|---------|---------|---------|---------|----------|----------|----------|---------|---------|---------|-----------------------|---------|---------|---------|---------|---------|---------|---------|---------|----------|----------|----------|------------------------|------|------|------|------|------|------|------|------|------|------|------|------|------|------|------|------|------|-------|------|------|------|------|------|------|------|----------------------|------|-------|------|-------|-------|-------|-------|-------|-------|-------|-------|-------|-------|-------|-------|-------|-------|--------|-------|-------|-------|-------|-------|-------|-------|-------|------|-------|------|-------|------|-------|------|------|------|------|------|-------|-------|-------|------|-------|-------|------|-------|------|------|-------|------|------|------|----------|----|---|---|----|-----|----|-----|------|----|----|----|----|----|----|----|----|----|----|----|----|----|----|----|----|----|-----------|-------|-------|--|------|--|--|-------|------|------|-----|------|--|--|------|--|--|--|------|--|-----|-------|--|------|-----|------|
| 1                                                                                                                                                                                                                                                                                                                                                                                                                                                                                                                                                                                                                                                                                                                                                                                                                                                                                                                                                                                                                                                                                                                                                                                                                                                                                                                                                                                                                                                                                                                                                                                                                                                                                                                                                                                                                                                                                                                                                                                                                                                                                                                                                                                                                                                                                                                                                                                                                                                                                                       | 12.86  | 65.3    | 8       | 10/25            | K256K          | (R)DLEKPFLLPVEAVYSVPGR(G) | 2129.1641                       | 114.0525                   | 4.3                         | 49541.87.26        | HUMAN   | P49411      | 186445            | Elongation factor Tu, mitochondrial OS=Homo sapiens GN=TUFM PE=1 SV=2 |                    |         |         |         |         |         |         |         |          |          |          |         |         |         |                       |         |         |         |         |         |         |         |         |          |          |          |                        |      |      |      |      |      |      |      |      |      |      |      |      |      |      |      |      |      |       |      |      |      |      |      |      |      |                      |      |       |      |       |       |       |       |       |       |       |       |       |       |       |       |       |       |        |       |       |       |       |       |       |       |       |      |       |      |       |      |       |      |      |      |      |      |       |       |       |      |       |       |      |       |      |      |       |      |      |      |          |    |   |   |    |     |    |     |      |    |    |    |    |    |    |    |    |    |    |    |    |    |    |    |    |    |           |       |       |  |      |  |  |       |      |      |     |      |  |  |      |  |  |  |      |  |     |       |  |      |     |      |
| <table border="1"> <thead> <tr> <th>Fragment-ion (m/z)</th> <th>86.095</th> <th>102.047</th> <th>120.077</th> <th>143.117</th> <th>197.129</th> <th>262.156</th> <th>326.164</th> <th>329.191</th> <th>358.217</th> <th>397.212</th> <th>428.259</th> <th>440.250</th> <th>481.253</th> <th>513.439<sup>+3</sup></th> <th>515.290</th> <th>571.368</th> <th>599.375</th> <th>678.350</th> <th>759.860</th> <th>777.430</th> <th>943.514</th> <th>978.523</th> <th>1070.584</th> <th>1173.636</th> <th>1266.700</th> </tr> </thead> <tbody> <tr> <td>Frac. Inten.(% of TIC)</td> <td>0.33</td> <td>2.96</td> <td>0.18</td> <td>5.07</td> <td>3.74</td> <td>2.91</td> <td>5.56</td> <td>3.80</td> <td>3.02</td> <td>4.91</td> <td>7.03</td> <td>2.99</td> <td>4.31</td> <td>2.94</td> <td>5.93</td> <td>2.68</td> <td>4.05</td> <td>12.12</td> <td>2.70</td> <td>3.92</td> <td>3.23</td> <td>4.03</td> <td>5.68</td> <td>2.98</td> <td>2.93</td> </tr> <tr> <td>Rel. Inten.(% of BP)</td> <td>2.71</td> <td>24.44</td> <td>1.45</td> <td>41.87</td> <td>30.89</td> <td>24.00</td> <td>45.88</td> <td>31.32</td> <td>24.90</td> <td>40.48</td> <td>58.04</td> <td>24.65</td> <td>35.54</td> <td>24.28</td> <td>48.90</td> <td>22.09</td> <td>33.45</td> <td>100.00</td> <td>22.31</td> <td>32.30</td> <td>26.63</td> <td>33.29</td> <td>46.90</td> <td>24.62</td> <td>24.16</td> </tr> <tr> <td>Score</td> <td>0.22</td> <td>-0.24</td> <td>1.00</td> <td>-0.42</td> <td>0.75</td> <td>-0.24</td> <td>0.75</td> <td>1.50</td> <td>0.75</td> <td>1.50</td> <td>1.50</td> <td>-0.25</td> <td>-0.36</td> <td>-0.24</td> <td>1.50</td> <td>-0.22</td> <td>-0.33</td> <td>1.50</td> <td>-0.22</td> <td>1.50</td> <td>1.50</td> <td>-0.33</td> <td>0.50</td> <td>1.50</td> <td>0.50</td> </tr> <tr> <td>Ion-type</td> <td>LI</td> <td>F</td> <td>F</td> <td>VP</td> <td>PVE</td> <td>YS</td> <td>PFL</td> <td>PVEA</td> <td>Y4</td> <td>Y4</td> <td>Y6</td> </tr> <tr> <td>Delta ppm</td> <td>-17.7</td> <td>-32.3</td> <td></td> <td>-5.3</td> <td></td> <td></td> <td>-25.0</td> <td>-6.0</td> <td>10.6</td> <td>7.7</td> <td>-6.5</td> <td></td> <td></td> <td>-7.6</td> <td></td> <td></td> <td></td> <td>-9.7</td> <td></td> <td>6.3</td> <td>-17.9</td> <td></td> <td>-4.8</td> <td>8.6</td> <td>-7.9</td> </tr> </tbody> </table> |        |         |         |                  |                |                           |                                 |                            |                             |                    |         |             |                   |                                                                       | Fragment-ion (m/z) | 86.095  | 102.047 | 120.077 | 143.117 | 197.129 | 262.156 | 326.164 | 329.191  | 358.217  | 397.212  | 428.259 | 440.250 | 481.253 | 513.439 <sup>+3</sup> | 515.290 | 571.368 | 599.375 | 678.350 | 759.860 | 777.430 | 943.514 | 978.523 | 1070.584 | 1173.636 | 1266.700 | Frac. Inten.(% of TIC) | 0.33 | 2.96 | 0.18 | 5.07 | 3.74 | 2.91 | 5.56 | 3.80 | 3.02 | 4.91 | 7.03 | 2.99 | 4.31 | 2.94 | 5.93 | 2.68 | 4.05 | 12.12 | 2.70 | 3.92 | 3.23 | 4.03 | 5.68 | 2.98 | 2.93 | Rel. Inten.(% of BP) | 2.71 | 24.44 | 1.45 | 41.87 | 30.89 | 24.00 | 45.88 | 31.32 | 24.90 | 40.48 | 58.04 | 24.65 | 35.54 | 24.28 | 48.90 | 22.09 | 33.45 | 100.00 | 22.31 | 32.30 | 26.63 | 33.29 | 46.90 | 24.62 | 24.16 | Score | 0.22 | -0.24 | 1.00 | -0.42 | 0.75 | -0.24 | 0.75 | 1.50 | 0.75 | 1.50 | 1.50 | -0.25 | -0.36 | -0.24 | 1.50 | -0.22 | -0.33 | 1.50 | -0.22 | 1.50 | 1.50 | -0.33 | 0.50 | 1.50 | 0.50 | Ion-type | LI | F | F | VP | PVE | YS | PFL | PVEA | Y4 | Y4 | Y6 | Y6 | Y6 | Y6 | Y6 | Y6 | Y6 | Y6 | Y6 | Y6 | Y6 | Y6 | Y6 | Y6 | Y6 | Delta ppm | -17.7 | -32.3 |  | -5.3 |  |  | -25.0 | -6.0 | 10.6 | 7.7 | -6.5 |  |  | -7.6 |  |  |  | -9.7 |  | 6.3 | -17.9 |  | -4.8 | 8.6 | -7.9 |
| Fragment-ion (m/z)                                                                                                                                                                                                                                                                                                                                                                                                                                                                                                                                                                                                                                                                                                                                                                                                                                                                                                                                                                                                                                                                                                                                                                                                                                                                                                                                                                                                                                                                                                                                                                                                                                                                                                                                                                                                                                                                                                                                                                                                                                                                                                                                                                                                                                                                                                                                                                                                                                                                                      | 86.095 | 102.047 | 120.077 | 143.117          | 197.129        | 262.156                   | 326.164                         | 329.191                    | 358.217                     | 397.212            | 428.259 | 440.250     | 481.253           | 513.439 <sup>+3</sup>                                                 | 515.290            | 571.368 | 599.375 | 678.350 | 759.860 | 777.430 | 943.514 | 978.523 | 1070.584 | 1173.636 | 1266.700 |         |         |         |                       |         |         |         |         |         |         |         |         |          |          |          |                        |      |      |      |      |      |      |      |      |      |      |      |      |      |      |      |      |      |       |      |      |      |      |      |      |      |                      |      |       |      |       |       |       |       |       |       |       |       |       |       |       |       |       |       |        |       |       |       |       |       |       |       |       |      |       |      |       |      |       |      |      |      |      |      |       |       |       |      |       |       |      |       |      |      |       |      |      |      |          |    |   |   |    |     |    |     |      |    |    |    |    |    |    |    |    |    |    |    |    |    |    |    |    |    |           |       |       |  |      |  |  |       |      |      |     |      |  |  |      |  |  |  |      |  |     |       |  |      |     |      |
| Frac. Inten.(% of TIC)                                                                                                                                                                                                                                                                                                                                                                                                                                                                                                                                                                                                                                                                                                                                                                                                                                                                                                                                                                                                                                                                                                                                                                                                                                                                                                                                                                                                                                                                                                                                                                                                                                                                                                                                                                                                                                                                                                                                                                                                                                                                                                                                                                                                                                                                                                                                                                                                                                                                                  | 0.33   | 2.96    | 0.18    | 5.07             | 3.74           | 2.91                      | 5.56                            | 3.80                       | 3.02                        | 4.91               | 7.03    | 2.99        | 4.31              | 2.94                                                                  | 5.93               | 2.68    | 4.05    | 12.12   | 2.70    | 3.92    | 3.23    | 4.03    | 5.68     | 2.98     | 2.93     |         |         |         |                       |         |         |         |         |         |         |         |         |          |          |          |                        |      |      |      |      |      |      |      |      |      |      |      |      |      |      |      |      |      |       |      |      |      |      |      |      |      |                      |      |       |      |       |       |       |       |       |       |       |       |       |       |       |       |       |       |        |       |       |       |       |       |       |       |       |      |       |      |       |      |       |      |      |      |      |      |       |       |       |      |       |       |      |       |      |      |       |      |      |      |          |    |   |   |    |     |    |     |      |    |    |    |    |    |    |    |    |    |    |    |    |    |    |    |    |    |           |       |       |  |      |  |  |       |      |      |     |      |  |  |      |  |  |  |      |  |     |       |  |      |     |      |
| Rel. Inten.(% of BP)                                                                                                                                                                                                                                                                                                                                                                                                                                                                                                                                                                                                                                                                                                                                                                                                                                                                                                                                                                                                                                                                                                                                                                                                                                                                                                                                                                                                                                                                                                                                                                                                                                                                                                                                                                                                                                                                                                                                                                                                                                                                                                                                                                                                                                                                                                                                                                                                                                                                                    | 2.71   | 24.44   | 1.45    | 41.87            | 30.89          | 24.00                     | 45.88                           | 31.32                      | 24.90                       | 40.48              | 58.04   | 24.65       | 35.54             | 24.28                                                                 | 48.90              | 22.09   | 33.45   | 100.00  | 22.31   | 32.30   | 26.63   | 33.29   | 46.90    | 24.62    | 24.16    |         |         |         |                       |         |         |         |         |         |         |         |         |          |          |          |                        |      |      |      |      |      |      |      |      |      |      |      |      |      |      |      |      |      |       |      |      |      |      |      |      |      |                      |      |       |      |       |       |       |       |       |       |       |       |       |       |       |       |       |       |        |       |       |       |       |       |       |       |       |      |       |      |       |      |       |      |      |      |      |      |       |       |       |      |       |       |      |       |      |      |       |      |      |      |          |    |   |   |    |     |    |     |      |    |    |    |    |    |    |    |    |    |    |    |    |    |    |    |    |    |           |       |       |  |      |  |  |       |      |      |     |      |  |  |      |  |  |  |      |  |     |       |  |      |     |      |
| Score                                                                                                                                                                                                                                                                                                                                                                                                                                                                                                                                                                                                                                                                                                                                                                                                                                                                                                                                                                                                                                                                                                                                                                                                                                                                                                                                                                                                                                                                                                                                                                                                                                                                                                                                                                                                                                                                                                                                                                                                                                                                                                                                                                                                                                                                                                                                                                                                                                                                                                   | 0.22   | -0.24   | 1.00    | -0.42            | 0.75           | -0.24                     | 0.75                            | 1.50                       | 0.75                        | 1.50               | 1.50    | -0.25       | -0.36             | -0.24                                                                 | 1.50               | -0.22   | -0.33   | 1.50    | -0.22   | 1.50    | 1.50    | -0.33   | 0.50     | 1.50     | 0.50     |         |         |         |                       |         |         |         |         |         |         |         |         |          |          |          |                        |      |      |      |      |      |      |      |      |      |      |      |      |      |      |      |      |      |       |      |      |      |      |      |      |      |                      |      |       |      |       |       |       |       |       |       |       |       |       |       |       |       |       |       |        |       |       |       |       |       |       |       |       |      |       |      |       |      |       |      |      |      |      |      |       |       |       |      |       |       |      |       |      |      |       |      |      |      |          |    |   |   |    |     |    |     |      |    |    |    |    |    |    |    |    |    |    |    |    |    |    |    |    |    |           |       |       |  |      |  |  |       |      |      |     |      |  |  |      |  |  |  |      |  |     |       |  |      |     |      |
| Ion-type                                                                                                                                                                                                                                                                                                                                                                                                                                                                                                                                                                                                                                                                                                                                                                                                                                                                                                                                                                                                                                                                                                                                                                                                                                                                                                                                                                                                                                                                                                                                                                                                                                                                                                                                                                                                                                                                                                                                                                                                                                                                                                                                                                                                                                                                                                                                                                                                                                                                                                | LI     | F       | F       | VP               | PVE            | YS                        | PFL                             | PVEA                       | Y4                          | Y4                 | Y6      | Y6          | Y6                | Y6                                                                    | Y6                 | Y6      | Y6      | Y6      | Y6      | Y6      | Y6      | Y6      | Y6       | Y6       | Y6       |         |         |         |                       |         |         |         |         |         |         |         |         |          |          |          |                        |      |      |      |      |      |      |      |      |      |      |      |      |      |      |      |      |      |       |      |      |      |      |      |      |      |                      |      |       |      |       |       |       |       |       |       |       |       |       |       |       |       |       |       |        |       |       |       |       |       |       |       |       |      |       |      |       |      |       |      |      |      |      |      |       |       |       |      |       |       |      |       |      |      |       |      |      |      |          |    |   |   |    |     |    |     |      |    |    |    |    |    |    |    |    |    |    |    |    |    |    |    |    |    |           |       |       |  |      |  |  |       |      |      |     |      |  |  |      |  |  |  |      |  |     |       |  |      |     |      |
| Delta ppm                                                                                                                                                                                                                                                                                                                                                                                                                                                                                                                                                                                                                                                                                                                                                                                                                                                                                                                                                                                                                                                                                                                                                                                                                                                                                                                                                                                                                                                                                                                                                                                                                                                                                                                                                                                                                                                                                                                                                                                                                                                                                                                                                                                                                                                                                                                                                                                                                                                                                               | -17.7  | -32.3   |         | -5.3             |                |                           | -25.0                           | -6.0                       | 10.6                        | 7.7                | -6.5    |             |                   | -7.6                                                                  |                    |         |         | -9.7    |         | 6.3     | -17.9   |         | -4.8     | 8.6      | -7.9     |         |         |         |                       |         |         |         |         |         |         |         |         |          |          |          |                        |      |      |      |      |      |      |      |      |      |      |      |      |      |      |      |      |      |       |      |      |      |      |      |      |      |                      |      |       |      |       |       |       |       |       |       |       |       |       |       |       |       |       |       |        |       |       |       |       |       |       |       |       |      |       |      |       |      |       |      |      |      |      |      |       |       |       |      |       |       |      |       |      |      |       |      |      |      |          |    |   |   |    |     |    |     |      |    |    |    |    |    |    |    |    |    |    |    |    |    |    |    |    |    |           |       |       |  |      |  |  |       |      |      |     |      |  |  |      |  |  |  |      |  |     |       |  |      |     |      |

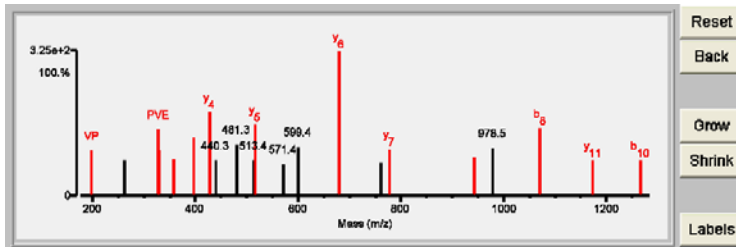



Result Summary

| Rank | Score | SPI (%) | BCS | # Unmatched Ions | Variable sites | Sequence            | MH <sup>+</sup> Calculated (Da) | MH <sup>+</sup> Error (Da) | MH <sup>+</sup> Error (ppm) | Protein MW/pi (Da) | Species | Accession # | Protein Name                                                                       |
|------|-------|---------|-----|------------------|----------------|---------------------|---------------------------------|----------------------------|-----------------------------|--------------------|---------|-------------|------------------------------------------------------------------------------------|
| 1    | 11.84 | 67.1    | 6   | 10/24            | K133k          | (R)VSAALEADkMFLR(T) | 1579.8149                       | 114.0547                   | 6.9                         | 20875.7/3.89       | HUMAN   | Q9Y6B2      | EP300-interacting inhibitor of differentiation 1 OS=Homo sapiens GN=EID1 PE=1 SV=1 |

Detailed Results

| Rank | Score | SPI (%) | BCS | # Unmatched Ions | Variable sites | Sequence            | MH <sup>+</sup> Calculated (Da) | MH <sup>+</sup> Error (Da) | MH <sup>+</sup> Error (ppm) | Protein MW/pi (Da) | Species | Accession # | MS-Digest Index # | Protein Name                                                                       |
|------|-------|---------|-----|------------------|----------------|---------------------|---------------------------------|----------------------------|-----------------------------|--------------------|---------|-------------|-------------------|------------------------------------------------------------------------------------|
| 1    | 11.84 | 67.1    | 6   | 10/24            | K133k          | (R)VSAALEADkMFLR(T) | 1579.8149                       | 114.0547                   | 6.9                         | 20875.7/3.89       | HUMAN   | Q9Y6B2      | 187729            | EP300-interacting inhibitor of differentiation 1 OS=Homo sapiens GN=EID1 PE=1 SV=1 |

| Fragment-ion (m/z)      | 72.081         | 84.081 | 86.097 | 87.056 | 115.085 | 120.079 | 129.095 | 136.070 | 159.107        | 175.118        | 187.145 | 230.113 | 240.131                          | 384.254 | 392.199 | 400.270 | 499.318 | 627.311 | 663.335 | 754.362           | 808.449        | 994.511        | 1123.541       | 1252.604       |
|-------------------------|----------------|--------|--------|--------|---------|---------|---------|---------|----------------|----------------|---------|---------|----------------------------------|---------|---------|---------|---------|---------|---------|-------------------|----------------|----------------|----------------|----------------|
| Frac. Inten. (% of TIC) | 0.86           | 9.35   | 0.49   | 0.10   | 3.57    | 0.14    | 4.66    | 3.46    | 7.80           | 5.16           | 3.31    | 9.75    | 3.56                             | 3.24    | 3.34    | 3.82    | 3.31    | 3.85    | 3.50    | 4.32              | 5.94           | 6.07           | 5.18           | 5.23           |
| Rel. Inten. (% of BP)   | 8.81           | 95.86  | 4.99   | 1.03   | 36.57   | 1.40    | 47.75   | 35.51   | 80.04          | 52.94          | 33.97   | 100.00  | 36.50                            | 33.18   | 34.30   | 39.20   | 33.94   | 39.46   | 35.91   | 44.29             | 60.90          | 62.28          | 53.11          | 53.60          |
| Score                   | 0.50           | -0.33  | 0.22   | 0.33   | -0.12   | 1.00    | -0.16   | -0.12   | 0.50           | 1.50           | -0.12   | 0.75    | 0.25                             | -0.11   | 0.75    | -0.13   | -0.12   | -0.13   | -0.12   | 1.50              | 1.50           | 1.50           | 1.50           | 1.50           |
| Ion-type                | a <sub>1</sub> |        | LI     | NR     |         | F       |         |         | a <sub>2</sub> | y <sub>1</sub> |         | SAA     | b <sub>3</sub> -H <sub>2</sub> O |         | MFL     |         |         |         |         | y <sup>++12</sup> | y <sub>5</sub> | y <sub>7</sub> | y <sub>8</sub> | y <sub>9</sub> |
| Delta ppm               | -9.3           | 0.50   | 12.5   | 11.6   |         | -16.5   |         |         | -43.4          | -7.7           |         | -6.2    | -19.4                            |         | -7.0    |         |         |         |         | -27.5             | -0.4           | -2.6           | -13.8          | 4.1            |

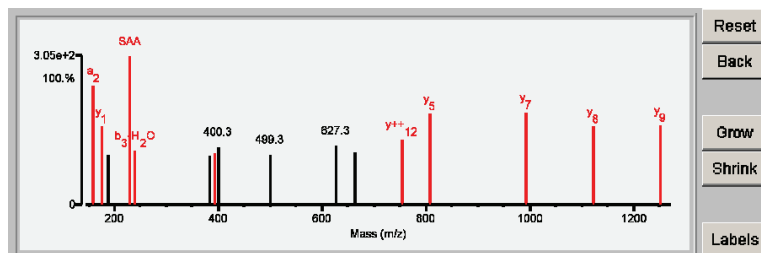

Result Summary

| Rank | Score | SPI (%) | BCS | # Unmatched Ions | Variable sites | Sequence                | MH <sup>+</sup> Calculated (Da) | MH <sup>+</sup> Error (Da) | MH <sup>+</sup> Error (ppm) | Protein MW/pI (Da) | Species | Accession # | Protein Name                              |
|------|-------|---------|-----|------------------|----------------|-------------------------|---------------------------------|----------------------------|-----------------------------|--------------------|---------|-------------|-------------------------------------------|
| 1    | 20.25 | 83.8    | 14  | 4/24             | K107k          | (K)ENMYAQTkLkDFQYVDR(D) | 2120.0117                       | 114.0558                   | 5.8                         | 57575.6/4.77       | HUMAN   | Q9Y6I3      | Epsin-1 OS=Homo sapiens GN=EPN1 PE=1 SV=1 |

Detailed Results

| Rank                       | Score | SPI (%) | BCS    | # Unmatched Ions | Variable sites | Sequence                | MH <sup>+</sup> Calculated (Da) | MH <sup>+</sup> Error (Da) | MH <sup>+</sup> Error (ppm) | Protein MW/pI (Da) | Species | Accession # | MS-Digest Index # | Protein Name                              |                  |         |                   |                       |                   |                   |         |                   |                   |         |          |
|----------------------------|-------|---------|--------|------------------|----------------|-------------------------|---------------------------------|----------------------------|-----------------------------|--------------------|---------|-------------|-------------------|-------------------------------------------|------------------|---------|-------------------|-----------------------|-------------------|-------------------|---------|-------------------|-------------------|---------|----------|
| 1                          | 20.25 | 83.8    | 14     | 4/24             | K107k          | (K)ENMYAQTkLkDFQYVDR(D) | 2120.0117                       | 114.0558                   | 5.8                         | 57575.6/4.77       | HUMAN   | Q9Y6I3      | 195733            | Epsin-1 OS=Homo sapiens GN=EPN1 PE=1 SV=1 |                  |         |                   |                       |                   |                   |         |                   |                   |         |          |
| Fragment-ion (m/z)         |       | 84.048  | 86.095 | 104.053          | 136.073        | 175.117                 | 226.083                         | 244.094                    | 290.142                     | 357.117            | 492.189 | 520.183     | 552.274           | 592.228*2                                 | 649.348*2        | 680.316 | 699.872*2         | 754.893*2             | 763.868*2         | 813.428*2         | 827.400 | 848.949*2         | 930.464*2         | 942.423 | 1184.588 |
| Frac. Inten.(% of TIC)     |       | 4.61    | 0.09   | 2.57             | 0.16           | 3.73                    | 4.02                            | 3.93                       | 3.04                        | 6.51               | 3.17    | 4.14        | 4.58              | 5.81                                      | 2.53             | 2.92    | 5.18              | 7.27                  | 4.19              | 4.73              | 4.45    | 6.37              | 5.76              | 6.83    | 3.41     |
| Rel. Inten.(% of BP) Score |       | 63.42   | 1.18   | 35.39            | 2.19           | 51.31                   | 55.33                           | 54.00                      | 41.87                       | 89.49              | 43.65   | 56.97       | 62.96             | 79.92                                     | 34.75            | 40.10   | 71.22             | 100.00                | 57.59             | 65.08             | 61.20   | 87.67             | 79.24             | 93.96   | 46.85    |
| Score                      |       | -0.63   | 0.22   | -0.35            | 1.00           | 1.50                    | 0.25                            | 0.50                       | 1.50                        | 0.25               | -0.44   | 0.25        | 1.50              | 0.25                                      | 1.50             | 1.50    | 1.50              | 0.50                  | 1.50              | 1.50              | 1.50    | 1.50              | 1.50              | 1.50    | 1.50     |
| Ion-type                   |       |         | LI     |                  | Y              | y1                      | b2-H2O                          | b2                         | b3-H2O                      | b4                 | y4      | b4-H2O      | y4                |                                           | y9 <sup>+2</sup> | a6      | y10 <sup>+2</sup> | y11+H2O <sup>+2</sup> | a12 <sup>+2</sup> | y12 <sup>+2</sup> | y6      | y13 <sup>+2</sup> | y14 <sup>+2</sup> | y7      | y8       |
| Delta ppm                  |       |         | -21.2  |                  | -22.7          | -10.0                   | -0.6                            | -1.6                       | -14.5                       | -18.0              | -8.3    | -7.5        |                   |                                           | 26.7             | 11.4    | 25.3              | 19.6                  | -2.5              | 13.1              | -6.0    | 15.2              | -4.0              | -8.7    | 15.2     |

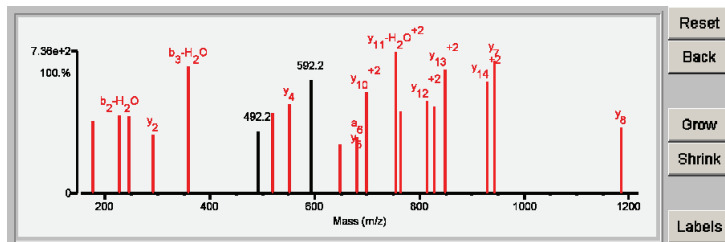

Result Summary

| Rank | Score | SPI (%) | BCS | Unmatched Ions | # Variable sites | Sequence                  | MH <sup>+</sup> Calculated (Da) | MH <sup>+</sup> Error (Da) | MH <sup>+</sup> Error (ppm) | Protein MW (Da) | Species | Accession # | Protein Name                                                          |
|------|-------|---------|-----|----------------|------------------|---------------------------|---------------------------------|----------------------------|-----------------------------|-----------------|---------|-------------|-----------------------------------------------------------------------|
| 1    | 18.52 | 81.4    | 10  | 4/25           | K146k            | (R)AEVQkLQMEAPHIVGTPGR(V) | 2174.1750                       | 114.0707                   | 12.2                        | 46154.2/5.32    | HUMAN   | P60842      | Eukaryotic initiation factor 4A-I OS=Homo sapiens GN=EIF4A1 PE=1 SV=1 |

Detailed Results

| Rank                    | Score  | SPI (%) | BCS    | Unmatched Ions | # Variable sites | Sequence                                                         | MH <sup>+</sup> Calculated (Da) | MH <sup>+</sup> Error (Da) | MH <sup>+</sup> Error (ppm) | Protein MW (Da) | Species | Accession # | MS-Digest Index # | Protein Name                                                          |         |                       |         |         |                       |                       |                       |         |                       |         |          |
|-------------------------|--------|---------|--------|----------------|------------------|------------------------------------------------------------------|---------------------------------|----------------------------|-----------------------------|-----------------|---------|-------------|-------------------|-----------------------------------------------------------------------|---------|-----------------------|---------|---------|-----------------------|-----------------------|-----------------------|---------|-----------------------|---------|----------|
| 1                       | 18.52  | 81.4    | 10     | 4/25           | K146k            | (R)A E V Q / k L Q / M E A / P R / I / I / V / G T / P G / R (V) | 2174.1750                       | 114.0707                   | 12.2                        | 46154.2/5.32    | HUMAN   | P60842      | 312285            | Eukaryotic initiation factor 4A-I OS=Homo sapiens GN=EIF4A1 PE=1 SV=1 |         |                       |         |         |                       |                       |                       |         |                       |         |          |
| Fragment-ion (m/z)      | 70.065 | 72.081  | 84.044 | 84.080         | 86.096           | 102.059                                                          | 173.092                         | 175.119                    | 201.088                     | 228.135         | 235.119 | 243.152     | 312.171           | 329.197                                                               | 351.173 | 356.224 <sup>+2</sup> | 487.275 | 586.330 | 621.009 <sup>+3</sup> | 657.323 <sup>+3</sup> | 689.375 <sup>+2</sup> | 699.430 | 744.395 <sup>+2</sup> | 812.519 | 1046.640 |
| Frac. Inten. (% of TIC) | 0.00   | 0.19    | 0.09   | 0.23           | 0.27             | 4.49                                                             | 7.19                            | 3.43                       | 9.76                        | 2.77            | 5.26    | 2.65        | 3.20              | 3.53                                                                  | 5.13    | 4.90                  | 4.72    | 5.01    | 2.86                  | 6.35                  | 6.19                  | 7.45    | 6.25                  | 4.66    | 3.41     |
| Rel. Inten. (% of BP)   | 0.05   | 1.93    | 0.89   | 2.33           | 2.77             | 45.95                                                            | 73.68                           | 35.17                      | 100.00                      | 28.38           | 53.83   | 27.14       | 32.82             | 36.18                                                                 | 52.54   | 50.24                 | 48.39   | 51.33   | 29.24                 | 65.07                 | 63.37                 | 76.28   | 63.97                 | 47.75   | 34.88    |
| Score                   | 0.20   | 0.50    | 1.00   | 0.50           | 0.22             | -0.46                                                            | 0.50                            | 1.50                       | 0.75                        | 0.75            | 0.75    | -0.27       | 0.50              | 1.50                                                                  | -0.53   | 0.75                  | 1.50    | 1.50    | 1.50                  | 1.50                  | 1.50                  | 1.50    | 0.50                  | 1.50    | 1.50     |
| Ion-type                | PR     | V       | E      | KQ             | LI               |                                                                  | a2                              | y1                         | b2                          | VQ              | PH      |             | y3-NH3            | y3                                                                    |         | VQKLQ <sup>+2</sup>   | y5      | y6      | y16 <sup>+3</sup>     |                       | y13 <sup>+2</sup>     | y7      | y14-H2O <sup>+2</sup> | y8      | y10      |
| Delta ppm               | -6.1   | 3.1     | -7.0   | -9.2           | -2.6             |                                                                  | EA-28                           | 2.0                        | 0.1                         | 0.2             | -5.7    |             | 13.7              | 13.1                                                                  |         | 35.5                  | 25.2    | -0.9    | -0.0                  |                       | 8.7                   | 21.2    | 2.1                   | 24.5    | 27.7     |

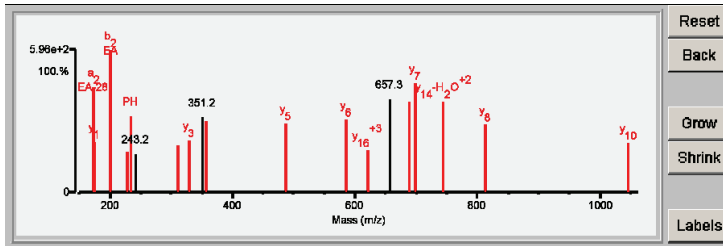

Result Summary

| Rank | Score | SPI (%) | BCS | # Unmatched Ions | Variable sites | Sequence                           | MH <sup>+</sup> Calculated (Da) | MH <sup>+</sup> Error (Da) | MH <sup>+</sup> Error (ppm) | Protein MW/pl (Da) | Species | Accession # | Protein Name                                                          |
|------|-------|---------|-----|------------------|----------------|------------------------------------|---------------------------------|----------------------------|-----------------------------|--------------------|---------|-------------|-----------------------------------------------------------------------|
| 1    | 14.08 | 65.9    | 9   | 8/25             | K177k          | (K)YIKMFVLDEAD <del>E</del> LSR(G) | 1959.9554                       | 114.0642                   | 10.3                        | 46154.2/5.32       | HUMAN   | P60842      | Eukaryotic initiation factor 4A-I OS=Homo sapiens GN=EIF4A1 PE=1 SV=1 |

Detailed Results

| Rank                    | Score | SPI (%) | BCS    | # Unmatched Ions | Variable sites | Sequence                           | MH <sup>+</sup> Calculated (Da) | MH <sup>+</sup> Error (Da) | MH <sup>+</sup> Error (ppm) | Protein MW/pl (Da) | Species | Accession # | MS-Digest Index # | Protein Name                                                          |                       |                       |         |         |         |         |         |         |                       |         |         |          |
|-------------------------|-------|---------|--------|------------------|----------------|------------------------------------|---------------------------------|----------------------------|-----------------------------|--------------------|---------|-------------|-------------------|-----------------------------------------------------------------------|-----------------------|-----------------------|---------|---------|---------|---------|---------|---------|-----------------------|---------|---------|----------|
| 1                       | 14.08 | 65.9    | 9      | 8/25             | K177k          | (K)YIKMFVLDEAD <del>E</del> LSR(G) | 1959.9554                       | 114.0642                   | 10.3                        | 46154.2/5.32       | HUMAN   | P60842      | 312285            | Eukaryotic initiation factor 4A-I OS=Homo sapiens GN=EIF4A1 PE=1 SV=1 |                       |                       |         |         |         |         |         |         |                       |         |         |          |
| Fragment-Ion (m/z)      |       | 72.080  | 84.044 | 84.080           | 86.096         | 102.057                            | 120.082                         | 136.076                    | 217.070                     | 245.076            | 249.156 | 250.163     | 262.149           | 374.226                                                               | 384.214 <sup>+2</sup> | 445.325 <sup>+2</sup> | 474.230 | 506.277 | 519.293 | 635.304 | 750.353 | 821.381 | 849.968 <sup>+2</sup> | 932.388 | 950.426 | 1065.462 |
| Frac. Inten. (% of TIC) |       | 0.37    | 0.12   | 7.11             | 0.40           | 0.09                               | 0.22                            | 0.32                       | 4.14                        | 3.08               | 6.61    | 3.41        | 5.54              | 3.17                                                                  | 6.64                  | 2.90                  | 3.37    | 5.76    | 4.26    | 5.01    | 5.76    | 11.80   | 3.36                  | 3.23    | 5.35    | 8.00     |
| Rel. Inten. (% of BP)   |       | 3.15    | 0.98   | 60.23            | 3.40           | 0.73                               | 1.83                            | 2.71                       | 35.12                       | 26.12              | 56.01   | 28.88       | 46.95             | 26.87                                                                 | 56.25                 | 24.55                 | 28.53   | 48.84   | 36.08   | 42.48   | 48.84   | 100.00  | 28.47                 | 27.37   | 45.32   | 67.81    |
| Score                   |       | 0.50    | 1.00   | -0.60            | 0.22           |                                    | 1.00                            | 1.00                       | -0.35                       | 0.75               | 0.50    | -0.29       | 1.50              | -0.27                                                                 | -0.56                 | -0.25                 | -0.29   | 1.50    | 0.50    | 1.50    | 1.50    | 1.50    | -0.28                 | 0.50    | 1.50    | 1.50     |
| Ion-type                |       | V       | E      |                  | L              | E                                  | F                               | a1                         |                             | DE                 | a2      |             | y2                |                                                                       |                       |                       | y4      | b3      | y5      | y6      | y7      |         | y8-H2O                | b++15   | y9      |          |
| Delta ppm               |       | -8.0    | -5.8   |                  | -8.4           |                                    | 7.7                             | -1.4                       |                             | -4.5               | -15.5   |             | -9.1              |                                                                       |                       |                       | 1.9     | 0.8     | -22.4   | 10.3    | -1.1    |         | -28.5                 | -22.4   | 9.3     |          |

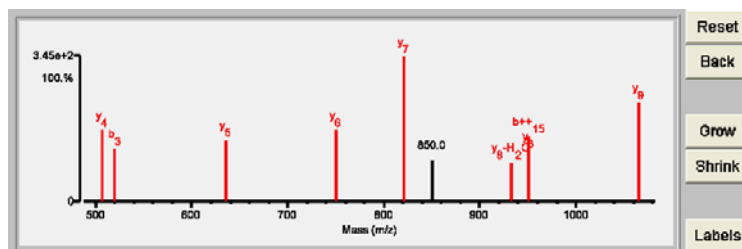

Result Summary

| Rank | Score | SPI (%) | BCS | # Unmatched Ions | Variable sites | Sequence         | MH <sup>+</sup> Calculated (Da) | MH <sup>+</sup> Error (Da) | MH <sup>+</sup> Error (ppm) | Protein MW/pI (Da) | Species | Accession # | Protein Name                                                          |
|------|-------|---------|-----|------------------|----------------|------------------|---------------------------------|----------------------------|-----------------------------|--------------------|---------|-------------|-----------------------------------------------------------------------|
| 1    | 10.53 | 69.6    | 6   | 8/25             | K193k          | (R)GFDQIYDFQK(L) | 1501.7686                       | 114.0614                   | 11.4                        | 46154.2/5.32       | HUMAN   | P60842      | Eukaryotic initiation factor 4A-1 OS=Homo sapiens GN=EIF4A1 PE=1 SV=1 |

Detailed Results

| Rank | Score | SPI (%) | BCS | # Unmatched Ions | Variable sites | Sequence         | MH <sup>+</sup> Calculated (Da) | MH <sup>+</sup> Error (Da) | MH <sup>+</sup> Error (ppm) | Protein MW/pI (Da) | Species | Accession # | MS-Digest Index # | Protein Name                                                          |
|------|-------|---------|-----|------------------|----------------|------------------|---------------------------------|----------------------------|-----------------------------|--------------------|---------|-------------|-------------------|-----------------------------------------------------------------------|
| 1    | 10.53 | 69.6    | 6   | 8/25             | K193k          | (R)GFDQIYDFQK(L) | 1501.7686                       | 114.0614                   | 11.4                        | 46154.2/5.32       | HUMAN   | P60842      | 312285            | Eukaryotic initiation factor 4A-1 OS=Homo sapiens GN=EIF4A1 PE=1 SV=1 |

  

| Fragment-ion (m/z)      | 84.042 | 84.080 | 86.096 | 91.055 | 120.081 | 129.099 | 136.075 | 147.111 | 165.097 | 177.101 | 198.120 | 244.092 | 257.165 | 258.146 | 276.133 | 339.180 | 358.149 | 387.203 | 392.185 | 422.244 | 447.248 | 486.232 | 650.350 | 690.309 | 813.428 |
|-------------------------|--------|--------|--------|--------|---------|---------|---------|---------|---------|---------|---------|---------|---------|---------|---------|---------|---------|---------|---------|---------|---------|---------|---------|---------|---------|
| Frac. Inten. (% of TIC) | 3.86   | 0.44   | 1.18   | 2.59   | 0.56    | 0.19    | 0.65    | 3.16    | 3.79    | 8.97    | 2.75    | 2.95    | 2.79    | 4.93    | 3.45    | 3.84    | 3.68    | 7.08    | 3.50    | 8.59    | 3.33    | 4.35    | 7.39    | 7.28    | 8.70    |
| Rel. Inten. (% of BP)   | 43.07  | 4.93   | 13.15  | 28.88  | 6.27    | 2.10    | 7.28    | 35.21   | 42.28   | 100.00  | 30.65   | 32.91   | 31.07   | 54.94   | 38.51   | 42.89   | 41.03   | 78.99   | 39.09   | 95.80   | 37.18   | 48.52   | 82.45   | 81.22   | 97.01   |
| Score                   | -0.43  | 0.50   | 0.22   | -0.29  | 1.00    | 0.20    | 1.00    | 1.50    | -0.42   | 0.50    | -0.31   | 0.75    | -0.31   | 0.50    | 0.75    | -0.43   | -0.41   | -0.79   | 0.75    | 1.50    | 0.50    | 0.75    | 1.50    | 0.50    | 1.50    |
| Ion-type                |        | KQ     | LI     |        | F       | RKQ     | Y       | y1      |         | a2      |         | DQ      |         | y2-NH3  | FQ      |         |         |         | YDI     | y3      | b3      | kDQ     | y5      | b5      | y6      |
| Delta ppm               |        | -8.0   | -3.8   |        | 4.4     | -28.2   | -4.3    | -15.7   |         | -14.3   |         | -7.4    |         | 6.1     | -8.6    |         |         |         | 5.8     | 10.7    | 25.6    | -0.2    | -1.1    | -17.8   | 16.8    |

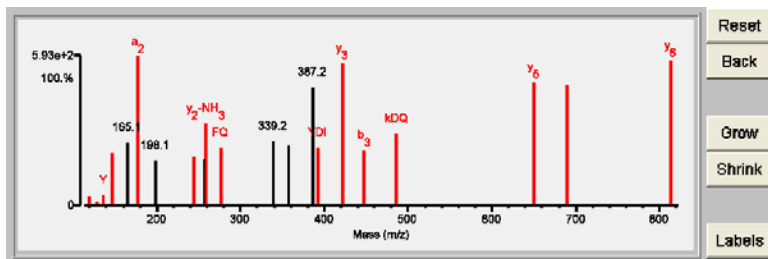

Result Summary

| Rank | Score | SPI (%) | BCS | # Unmatched Ions | Variable sites | Sequence               | MH <sup>+</sup> Calculated (Da) | MH <sup>+</sup> Error (Da) | MH <sup>+</sup> Error (ppm) | Protein MW/pi (Da) | Species | Accession #             | Protein Name                                                                   |
|------|-------|---------|-----|------------------|----------------|------------------------|---------------------------------|----------------------------|-----------------------------|--------------------|---------|-------------------------|--------------------------------------------------------------------------------|
| 1    | 25.87 | 98.1    | 11  | 1/25             | K54k           | (R)GIYAYGFekPSAIQQR(A) | 1827.9388                       | 114.0436                   | 0.4                         | 46154.2/5.32       | HUMAN   | <a href="#">P60842</a>  | Eukaryotic initiation factor 4A-I OS=Homo sapiens GN=EIF4A1 PE=1 SV=1          |
| 1    | 25.87 | 98.1    | 11  | 1/25             | K55k           | (R)GIYAYGFekPSAIQQR(A) | 1827.9388                       | 114.0436                   | 0.4                         | 46402.5/5.33       | HUMAN   | <a href="#">Q14240</a>  | Eukaryotic initiation factor 4A-II OS=Homo sapiens GN=EIF4A2 PE=1 SV=2         |
| 1    | 25.87 | 98.1    | 11  | 1/25             | K60k           | (R)GIYAYGFekPSAIQQR(A) | 1827.9388                       | 114.0436                   | 0.4                         | 46871.3/6.30       | HUMAN   | <a href="#">P38919</a>  | Eukaryotic initiation factor 4A-III OS=Homo sapiens GN=EIF4A3 PE=1 SV=4        |
| 2    | 9.39  | 56.2    | 2   | 11/25            | K353k          | (R)QIASPKkEFGYAYIGR(L) | 1827.9388                       | 114.0436                   | 0.4                         | 46154.2/5.32       | HUMAN   | <a href="#">RP60842</a> | REVERSE Eukaryotic initiation factor 4A-I OS=Homo sapiens GN=EIF4A1 PE=1 SV=1  |
| 2    | 9.39  | 56.2    | 2   | 11/25            | K353k          | (R)QIASPKkEFGYAYIGR(L) | 1827.9388                       | 114.0436                   | 0.4                         | 46402.5/5.33       | HUMAN   | <a href="#">RQ14240</a> | REVERSE Eukaryotic initiation factor 4A-II OS=Homo sapiens GN=EIF4A2 PE=1 SV=2 |

Detailed Results

| Rank | Score | SPI (%) | BCS | # Unmatched Ions | Variable sites | Sequence                                                     | MH <sup>+</sup> Calculated (Da) | MH <sup>+</sup> Error (Da) | MH <sup>+</sup> Error (ppm) | Protein MW/pi (Da) | Species | Accession #            | MS-Digest Index #      | Protein Name                                                            |
|------|-------|---------|-----|------------------|----------------|--------------------------------------------------------------|---------------------------------|----------------------------|-----------------------------|--------------------|---------|------------------------|------------------------|-------------------------------------------------------------------------|
| 1    | 25.87 | 98.1    | 11  | 1/25             | K54k           | (R)G I I Y I A I Y / G / F E / k / P / S / A / I / Q Q R (A) | 1827.9388                       | 114.0436                   | 0.4                         | 46154.2/5.32       | HUMAN   | <a href="#">P60842</a> | <a href="#">312285</a> | Eukaryotic initiation factor 4A-I OS=Homo sapiens GN=EIF4A1 PE=1 SV=1   |
| 1    | 25.87 | 98.1    | 11  | 1/25             | K55k           | (R)G I I Y I A I Y / G / F E / k / P / S / A / I / Q Q R (A) | 1827.9388                       | 114.0436                   | 0.4                         | 46402.5/5.33       | HUMAN   | <a href="#">Q14240</a> | <a href="#">312305</a> | Eukaryotic initiation factor 4A-II OS=Homo sapiens GN=EIF4A2 PE=1 SV=2  |
| 1    | 25.87 | 98.1    | 11  | 1/25             | K60k           | (R)G I I Y I A I Y / G / F E / k / P / S / A / I / Q Q R (A) | 1827.9388                       | 114.0436                   | 0.4                         | 46871.3/6.30       | HUMAN   | <a href="#">P38919</a> | <a href="#">312323</a> | Eukaryotic initiation factor 4A-III OS=Homo sapiens GN=EIF4A3 PE=1 SV=4 |

| Fragment-ion (m/z)     | 84.081 | 86.097 | 136.076 | 143.118 | 171.113 | 207.114 | 235.106 | 334.174 | 400.224 <sup>+2</sup> | 405.213 | 431.233 | 521.297           | 544.320 | 576.272 | 615.355 | 659.345 <sup>+2</sup> | 687.857            | 688.366 | 702.386 | 739.331 | 769.392 <sup>+2</sup> | 799.440 | 804.904 <sup>+2</sup> | 886.434 <sup>+2</sup> | 1041.575 |
|------------------------|--------|--------|---------|---------|---------|---------|---------|---------|-----------------------|---------|---------|-------------------|---------|---------|---------|-----------------------|--------------------|---------|---------|---------|-----------------------|---------|-----------------------|-----------------------|----------|
| Frac. Inten.(% of TIC) | 0.10   | 0.12   | 0.39    | 9.82    | 1.77    | 2.23    | 2.15    | 4.39    | 5.73                  | 2.37    | 2.69    | 3.49              | 1.73    | 1.82    | 1.56    | 2.90                  | 4.07               | 1.94    | 2.14    | 3.60    | 9.76                  | 18.78   | 6.04                  | 8.73                  | 1.66     |
| Rel. Inten.(% of BP)   | 0.53   | 0.64   | 2.06    | 52.29   | 9.43    | 11.89   | 11.46   | 23.40   | 30.49                 | 12.62   | 14.29   | 18.60             | 9.20    | 9.70    | 8.32    | 15.45                 | 21.69              | 10.31   | 11.40   | 19.16   | 51.97                 | 100.00  | 32.13                 | 46.49                 | 8.86     |
| Score                  | 0.50   | 0.22   | 1.00    | 0.50    | 0.50    | 0.50    | 0.75    | 0.50    | 1.50                  | 0.50    | 1.50    | 1.50              | 0.75    | 1.50    | 1.50    | 1.50                  | -0.10              | 1.50    | 1.50    | 0.75    | 1.50                  | 1.50    | 1.50                  | 1.50                  | 1.50     |
| Ion-type               | KQ     | LI     | Y       | #2      | b2      | AY-26   | AY      | b3      | y7 <sup>+2</sup>      | b4      | y3      | y <sup>++</sup> 8 | y4      | GFEK    | y5      | y10 <sup>+2</sup>     | y <sup>++</sup> 11 |         | y6      | YGFEK   | y12 <sup>+2</sup>     | y7      | y13 <sup>+2</sup>     | y14 <sup>+2</sup>     | y8       |
| Delta ppm              | 6.2    | 3.2    | 3.0     | -10.4   | -5.9    | -1.0    | -10.7   | -8.8    | -1.9                  | -4.1    | -6.3    | 6.5               | -0.7    | -11.3   | -3.6    | -6.6                  | -4.2               |         | -5.3    | -14.7   | 1.0                   | -2.7    | -7.9                  | -8.7                  | -4.6     |

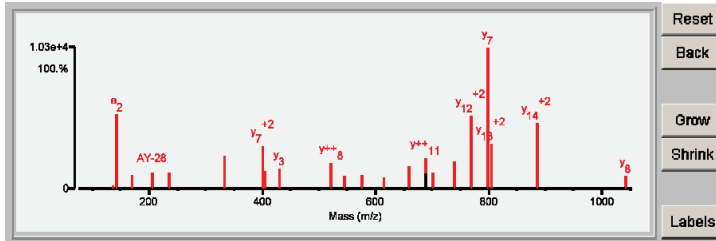

Reset  
Back  
Grow  
Shrink  
Labels

Result Summary

| Rank | Score | SP1 (%) | BCS | # Unmatched Ions | Variable sites | Sequence                                  | MH <sup>+</sup> Calculated (Da) | MH <sup>+</sup> Error (Da) | MH <sup>+</sup> Error (ppm) | Protein MW/pl (Da) | Species | Accession # | Protein Name                                                                 |
|------|-------|---------|-----|------------------|----------------|-------------------------------------------|---------------------------------|----------------------------|-----------------------------|--------------------|---------|-------------|------------------------------------------------------------------------------|
| 1    | 19.96 | 89.4    | 10  | 5/25             | K69K           | (R)AII <sup>a</sup> PCIKGYDVIAQAQSGTGK(T) | 2190.1587                       | 114.0659                   | 10.0                        | 46402.5/5.33       | HUMAN   | Q14240      | Eukaryotic initiation factor 4A-II OS=Homo sapiens GN=EIF4A2 PE=1 SV=2       |
| 1    | 19.96 | 89.4    | 10  | 5/25             | K68K           | (R)AII <sup>a</sup> PCIKGYDVIAQAQSGTGK(T) | 2190.1587                       | 114.0659                   | 10.0                        | 46154.2/5.32       | HUMAN   | P60842      | Eukaryotic initiation factor 4A-I OS=Homo sapiens GN=EIF4A1 PE=1 SV=1        |
| 2    | 5.49  | 53.6    | 2   | 15/25            | K83K           | (R)AII <sup>a</sup> PCIKGYDVIAQAQSGTGK(T) | 2190.1587                       | 114.0659                   | 10.0                        | 46402.5/5.33       | HUMAN   | Q14240      | Eukaryotic initiation factor 4A-II OS=Homo sapiens GN=EIF4A2 PE=1 SV=2       |
| 2    | 5.49  | 53.6    | 2   | 15/25            | K82K           | (R)AII <sup>a</sup> PCIKGYDVIAQAQSGTGK(T) | 2190.1587                       | 114.0659                   | 10.0                        | 46154.2/5.32       | HUMAN   | P60842      | Eukaryotic initiation factor 4A-I OS=Homo sapiens GN=EIF4A1 PE=1 SV=1        |
| 3    | 4.96  | 52.9    | 3   | 16/25            | None           | (R)AII <sup>a</sup> LEMLNHTAHLRLSDTK(L)   | 2304.2493                       | -0.0246                    | -10.7                       | 193000.5/7.34      | HUMAN   | RQ149N8     | REVERSE E3 ubiquitin-protein ligase SHPRH OS=Homo sapiens GN=SHPRH PE=1 SV=2 |

Detailed Results

| Rank | Score | SP1 (%) | BCS | # Unmatched Ions | Variable sites | Sequence                                    | MH <sup>+</sup> Calculated (Da) | MH <sup>+</sup> Error (Da) | MH <sup>+</sup> Error (ppm) | Protein MW/pl (Da) | Species | Accession # | MS-Digest Index # | Protein Name                                                           |
|------|-------|---------|-----|------------------|----------------|---------------------------------------------|---------------------------------|----------------------------|-----------------------------|--------------------|---------|-------------|-------------------|------------------------------------------------------------------------|
| 1    | 19.96 | 89.4    | 10  | 5/25             | K69K           | (R)AII <sup>a</sup> IIPCIKGYDVIAQAQSGTGK(T) | 2190.1587                       | 114.0659                   | 10.0                        | 46402.5/5.33       | HUMAN   | Q14240      | 312305            | Eukaryotic initiation factor 4A-II OS=Homo sapiens GN=EIF4A2 PE=1 SV=2 |

  

| Fragment-ion (m/z)      | 84.078 | 86.095 | 87.097 | 157.133 | 185.128 | 204.132 | 258.085 | 298.214 | 362.204 | 371.176 | 449.228 | 510.251 <sup>+2</sup> | 560.263 | 577.288 | 577.364 | 648.330 | 759.360 | 776.387 | 847.427 | 960.515 | 1004.012 <sup>+2</sup> | 1047.476 | 1060.554 <sup>+2</sup> | 1160.572 | 1344.685 |
|-------------------------|--------|--------|--------|---------|---------|---------|---------|---------|---------|---------|---------|-----------------------|---------|---------|---------|---------|---------|---------|---------|---------|------------------------|----------|------------------------|----------|----------|
| Frac. Inten. (% of TIC) | 0.07   | 0.33   | 1.64   | 6.65    | 13.07   | 1.92    | 1.91    | 3.28    | 2.04    | 1.72    | 3.46    | 2.13                  | 2.74    | 2.01    | 1.58    | 5.65    | 1.81    | 4.46    | 8.73    | 3.27    | 20.78                  | 2.70     | 3.82                   | 2.60     | 1.64     |
| Rel. Inten. (% of BP)   | 0.32   | 1.60   | 7.88   | 32.00   | 62.89   | 9.24    | 9.19    | 15.78   | 9.79    | 8.29    | 16.63   | 10.23                 | 13.18   | 9.67    | 7.62    | 27.19   | 8.72    | 21.47   | 41.98   | 15.71   | 100.00                 | 13.01    | 18.38                  | 12.51    | 7.88     |
| Score                   | 0.50   | 0.22   | -0.08  | 0.50    | 0.75    | 1.50    | 0.75    | 0.50    | 1.50    | 0.75    | 1.50    | -0.10                 | 0.50    | 1.50    | -0.08   | 1.50    | 0.50    | 1.50    | 1.50    | 1.50    | 1.50                   | -0.13    | 1.50                   | -0.13    | 0.50     |
| Ion-type                | KQ     | LI     |        | a2      | b2      | y2      | PC      | b3      | y4      | PCI     | y5      |                       | y6-NH3  | y6      |         | y7      | y8-NH3  | y8      | y9      | y10     | y18 <sup>+2</sup>      |          | y19 <sup>+2</sup>      | b11      |          |
| Delta ppm               | -36.6  | -18.9  |        | -10.4   | -8.9    | -12.6   | -25.5   | 1.3     | 1.9     | -0.4    | -17.4   |                       | -8.7    | -9.9    |         | -1.9    | -3.9    | -3.2    | -0.4    | 4.3     | 10.0                   |          | 9.3                    | -10.7    |          |

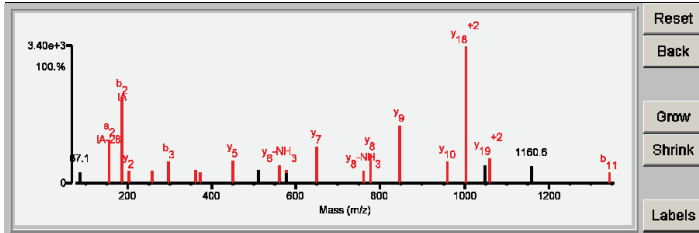

Result Summary

| Rank | Score | SPI (%) | BCS | # Unmatched Ions | Variable sites | Sequence                 | MH <sup>+</sup> Calculated (Da) | MH <sup>+</sup> Error (Da) | MH <sup>+</sup> Error (ppm) | Protein MW/pl (Da) | Species | Accession # | Protein Name                                                                           |
|------|-------|---------|-----|------------------|----------------|--------------------------|---------------------------------|----------------------------|-----------------------------|--------------------|---------|-------------|----------------------------------------------------------------------------------------|
| 1    | 18.38 | 78.3    | 10  | 5/25             | K68k           | (K)KYEDICPSTHNMDVPNIK(R) | 2161.0053                       | 114.0509                   | 3.5                         | 16832.4/5.08       | HUMAN   | P63241      | Eukaryotic translation initiation factor 5A-1 OS=Homo sapiens GN=EIF5A PE=1 SV=2       |
| 1    | 18.38 | 78.3    | 10  | 5/25             | K68k           | (K)KYEDICPSTHNMDVPNIK(R) | 2161.0053                       | 114.0509                   | 3.5                         | 16793.3/5.38       | HUMAN   | Q9GZV4      | Eukaryotic translation initiation factor 5A-2 OS=Homo sapiens GN=EIF5A2 PE=1 SV=3      |
| 1    | 18.38 | 78.3    | 10  | 5/25             | K68k           | (K)KYEDICPSTHNMDVPNIK(R) | 2161.0053                       | 114.0509                   | 3.5                         | 16773.3/4.85       | HUMAN   | Q6IS14      | Eukaryotic translation initiation factor 5A-1-like OS=Homo sapiens GN=EIF5A1 PE=2 SV=2 |
| 2    | 6.88  | 50.0    | 2   | 14/25            | K55k           | (R)ASQSFQKGCCECKFLKER(T) | 2161.0165                       | 114.0397                   | -1.4                        | 92033.5/9.11       | HUMAN   | RQ86WZ6     | REVERSE Zinc finger protein 227 OS=Homo sapiens GN=ZNF227 PE=2 SV=1                    |
| 2    | 6.88  | 50.0    | 2   | 14/25            | K58k           | (R)ASQSFQKGCCECKFLKER(T) | 2161.0165                       | 114.0397                   | -1.4                        | 92033.5/9.11       | HUMAN   | RQ86WZ6     | REVERSE Zinc finger protein 227 OS=Homo sapiens GN=ZNF227 PE=2 SV=1                    |

Detailed Results

| Rank | Score | SPI (%) | BCS | # Unmatched Ions | Variable sites | Sequence                                   | MH <sup>+</sup> Calculated (Da) | MH <sup>+</sup> Error (Da) | MH <sup>+</sup> Error (ppm) | Protein MW/pl (Da) | Species | Accession # | MS-Digest Index # | Protein Name                                                                           |
|------|-------|---------|-----|------------------|----------------|--------------------------------------------|---------------------------------|----------------------------|-----------------------------|--------------------|---------|-------------|-------------------|----------------------------------------------------------------------------------------|
| 1    | 18.38 | 78.3    | 10  | 5/25             | K68k           | (K)k Y E D I C P S T H N M D V P N I K (R) | 2161.0053                       | 114.0509                   | 3.5                         | 16832.4/5.08       | HUMAN   | P63241      | 312563            | Eukaryotic translation initiation factor 5A-1 OS=Homo sapiens GN=EIF5A PE=1 SV=2       |
| 1    | 18.38 | 78.3    | 10  | 5/25             | K68k           | (K)k Y E D I C P S T H N M D V P N I K (R) | 2161.0053                       | 114.0509                   | 3.5                         | 16793.3/5.38       | HUMAN   | Q9GZV4      | 312591            | Eukaryotic translation initiation factor 5A-2 OS=Homo sapiens GN=EIF5A2 PE=1 SV=3      |
| 1    | 18.38 | 78.3    | 10  | 5/25             | K68k           | (K)k Y E D I C P S T H N M D V P N I K (R) | 2161.0053                       | 114.0509                   | 3.5                         | 16773.3/4.85       | HUMAN   | Q6IS14      | 312619            | Eukaryotic translation initiation factor 5A-1-like OS=Homo sapiens GN=EIF5A1 PE=2 SV=2 |

| Fragment-ion (m/z)      | 70.066 | 72.082 | 84.081 | 86.097 | 116.017 | 129.103 | 133.043 | 147.114 | 368.189 <sup>+2</sup> | 406.203 | 451.560 <sup>+3</sup> | 452.229 | 471.292           | 504.902 <sup>+3</sup> | 534.272           | 584.793 <sup>+2</sup> | 628.304 <sup>+2</sup> | 650.276               | 668.325 <sup>+2</sup> | 676.836 <sup>+2</sup> | 685.388           | 756.856 <sup>+2</sup> | 763.361 | 783.311 | 882.376 |
|-------------------------|--------|--------|--------|--------|---------|---------|---------|---------|-----------------------|---------|-----------------------|---------|-------------------|-----------------------|-------------------|-----------------------|-----------------------|-----------------------|-----------------------|-----------------------|-------------------|-----------------------|---------|---------|---------|
| Frac. Inten. (% of TIC) | 0.00   | 0.05   | 0.18   | 0.42   | 2.30    | 0.05    | 12.85   | 1.89    | 2.03                  | 1.62    | 2.64                  | 1.76    | 6.02              | 1.68                  | 3.08              | 2.09                  | 1.74                  | 9.29                  | 2.27                  | 29.29                 | 1.80              | 2.61                  | 9.71    | 2.47    | 2.35    |
| Rel. Inten. (% of BP)   | 0.01   | 0.19   | 0.61   | 1.44   | 7.84    | 0.18    | 43.99   | 6.44    | 6.93                  | 5.52    | 9.03                  | 6.02    | 20.55             | 5.75                  | 10.53             | 7.12                  | 5.93                  | 31.73                 | 7.75                  | 100.00                | 5.48              | 8.90                  | 33.15   | 8.45    | 8.03    |
| Score                   | 0.20   | 0.50   | 0.50   | 0.22   | -0.08   | 0.20    | -0.44   | 1.50    | 0.50                  | 0.50    | 1.50                  | -0.06   | 1.50              | 1.50                  | 1.50              | 1.50                  | 1.50                  | 0.50                  | 0.50                  | 1.50                  | 1.50              | 1.50                  | 0.50    | -0.08   | -0.08   |
| Ion-type                | PR     | V      | KQ     | LI     |         | RKQ     |         | Y1      | a5 <sup>+2</sup>      | b2      | y12 <sup>+3</sup>     | y4      | y13 <sup>+3</sup> | Y++9                  | y10 <sup>+2</sup> | y11 <sup>+2</sup>     | b4                    | y12-NH3 <sup>+2</sup> | y12 <sup>+2</sup>     | y6                    | y13 <sup>+2</sup> | b5                    |         |         |         |
| Delta ppm               | 18.2   | 12.8   | 7.4    | 6.7    |         | 2.8     |         | 11.5    | 2.2                   | -16.2   | 0.9                   |         | -0.6              | 1.1                   | 6.6               | 0.0                   | -7.0                  | -4.5                  | 5.1                   | 0.7                   | 0.6               | 7.4                   | -3.0    |         |         |

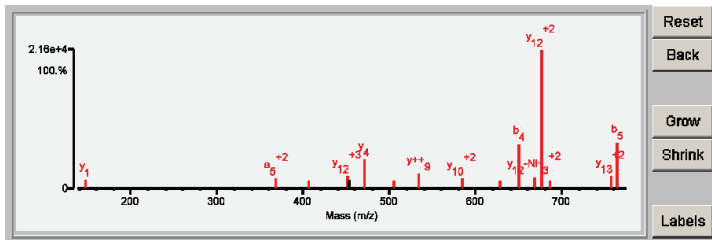



Result Summary

| Rank | Score | SPI (%) | BCS | # Unmatched Ions | Variable sites | Sequence                 | MH <sup>+</sup> Calculated (Da) | MH <sup>+</sup> Error (Da) | MH <sup>+</sup> Error (ppm) | Protein MW/PI (Da) | Species | Accession # | Protein Name                                                                            |
|------|-------|---------|-----|------------------|----------------|--------------------------|---------------------------------|----------------------------|-----------------------------|--------------------|---------|-------------|-----------------------------------------------------------------------------------------|
| 1    | 12.40 | 64.6    | 7   | 9/25             | K85k           | (K)YEDICPSTHNMDVPNIkR(N) | 2189.0114                       | 114.0508                   | 3.4                         | 16832.4/5.08       | HUMAN   | P63241      | Eukaryotic translation initiation factor 5A-1 OS=Homo sapiens GN=EIF5A PE=1 SV=2        |
| 1    | 12.40 | 64.6    | 7   | 9/25             | K85k           | (K)YEDICPSTHNMDVPNIkR(N) | 2189.0114                       | 114.0508                   | 3.4                         | 16793.3/5.38       | HUMAN   | Q9GZV4      | Eukaryotic translation initiation factor 5A-2 OS=Homo sapiens GN=EIF5A2 PE=1 SV=3       |
| 1    | 12.40 | 64.6    | 7   | 9/25             | K85k           | (K)YEDICPSTHNMDVPNIkR(N) | 2189.0114                       | 114.0508                   | 3.4                         | 16773.3/4.85       | HUMAN   | Q6IS14      | Eukaryotic translation initiation factor 5A-1-like OS=Homo sapiens GN=EIF5AL1 PE=2 SV=2 |

Detailed Results

| Rank | Score | SPI (%) | BCS | # Unmatched Ions | Variable sites | Sequence                        | MH <sup>+</sup> Calculated (Da) | MH <sup>+</sup> Error (Da) | MH <sup>+</sup> Error (ppm) | Protein MW/PI (Da) | Species | Accession # | MS-Digest Index # | Protein Name                                                                            |
|------|-------|---------|-----|------------------|----------------|---------------------------------|---------------------------------|----------------------------|-----------------------------|--------------------|---------|-------------|-------------------|-----------------------------------------------------------------------------------------|
| 1    | 12.40 | 64.6    | 7   | 9/25             | K85k           | (K)YEDIDICPSTHNMDV/P/N/I/k/R(N) | 2189.0114                       | 114.0508                   | 3.4                         | 16832.4/5.08       | HUMAN   | P63241      | 312563            | Eukaryotic translation initiation factor 5A-1 OS=Homo sapiens GN=EIF5A PE=1 SV=2        |
| 1    | 12.40 | 64.6    | 7   | 9/25             | K85k           | (K)YEDIDICPSTHNMDV/P/N/I/k/R(N) | 2189.0114                       | 114.0508                   | 3.4                         | 16793.3/5.38       | HUMAN   | Q9GZV4      | 312591            | Eukaryotic translation initiation factor 5A-2 OS=Homo sapiens GN=EIF5A2 PE=1 SV=3       |
| 1    | 12.40 | 64.6    | 7   | 9/25             | K85k           | (K)YEDIDICPSTHNMDV/P/N/I/k/R(N) | 2189.0114                       | 114.0508                   | 3.4                         | 16773.3/4.85       | HUMAN   | Q6IS14      | 312619            | Eukaryotic translation initiation factor 5A-1-like OS=Homo sapiens GN=EIF5AL1 PE=2 SV=2 |

| Fragment-ion (m/z)     | 70.065 | 72.082 | 84.080 | 86.097 | 110.071 | 136.076 | 137.077 | 175.116 | 201.120 | 202.091 | 265.118 | 293.117 | 343.209 | 362.709*2 | 371.222*2 | 399.132 | 408.141 | 417.265 | 530.337 | 537.237 | 644.386 | 720.049 | 741.435 | 783.311 | 943.348 |
|------------------------|--------|--------|--------|--------|---------|---------|---------|---------|---------|---------|---------|---------|---------|-----------|-----------|---------|---------|---------|---------|---------|---------|---------|---------|---------|---------|
| Frac. Inten.(% of TIC) | 0.02   | 0.23   | 4.48   | 0.25   | 0.22    | 0.68    | 3.47    | 5.20    | 5.64    | 3.11    | 7.93    | 4.68    | 3.11    | 3.26      | 8.43      | 3.30    | 6.65    | 2.96    | 3.14    | 3.06    | 6.20    | 3.43    | 12.74   | 5.05    | 3.78    |
| Rel. Inten.(% of BP)   | 0.12   | 1.77   | 35.16  | 1.92   | 1.71    | 5.34    | 27.24   | 40.84   | 44.30   | 24.38   | 62.23   | 36.69   | 24.39   | 25.58     | 66.20     | 25.88   | 44.33   | 23.19   | 24.61   | 24.02   | 48.66   | 26.94   | 100.00  | 39.60   | 29.65   |
| Score                  | 0.20   | 0.50   | -0.35  | 0.22   | 1.00    | 1.00    | -0.27   | 1.50    | -0.44   | -0.24   | 0.50    | 0.50    | -0.24   | 0.50      | 1.50      | -0.26   | 0.50    | 1.50    | 1.50    | 0.75    | 1.50    | -0.27   | 1.50    | -0.40   | -0.30   |
| Ion-type               | PR     | V      |        | LI     | H       | a1      | y1      | a2      | b2      |         | a2      | b2      |         | y5-NH3*2  | y5*2      |         | b3      | y2      | y3      | PSTHN   | y4      |         | y5      |         |         |
| Delta ppm              | 2.5    | 10.0   |        | 11.3   | -7.0    | -7.3    | 1.00    | -14.6   |         |         | -6.0    | 10.3    |         | 1.2       | -0.6      |         | -1.3    | 20.0    | -8.1    | -9.8    | 3.5     |         | -2.6    |         |         |

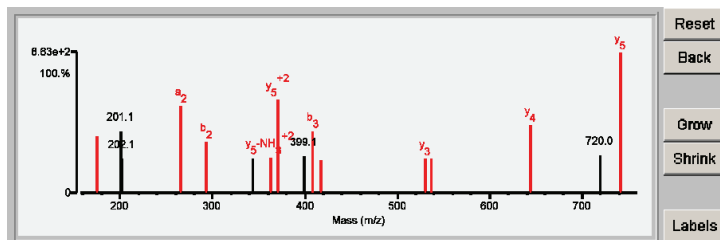

Result Summary

| Rank | Score | SPI (%) | BCS | # Unmatched Ions | Variable sites | Sequence           | MH <sup>+</sup> Calculated (Da) | MH <sup>+</sup> Error (Da) | MH <sup>+</sup> Error (ppm) | Protein MW/PI (Da) | Species | Accession # | Protein Name                                                                                                                 |
|------|-------|---------|-----|------------------|----------------|--------------------|---------------------------------|----------------------------|-----------------------------|--------------------|---------|-------------|------------------------------------------------------------------------------------------------------------------------------|
| 1    | 11.09 | 82.0    | 3   | 12/25            | K224k          | (K)YLSFLEKROK(L)   | 1311.7419                       | 114.0270                   | -11.2                       | 58305.1/5.50       | HUMAN   | Q8NHP7      | Exonuclease 3'-5' domain-like-containing protein 1 OS=Homo sapiens GN=EXDL1 PE=2 SV=3                                        |
| 2    | 8.97  | 79.6    | 2   | 14/25            | K227k          | (K)YLSFLEKROK(L)   | 1311.7419                       | 114.0270                   | -11.2                       | 58305.1/5.50       | HUMAN   | Q8NHP7      | Exonuclease 3'-5' domain-like-containing protein 1 OS=Homo sapiens GN=EXDL1 PE=2 SV=3                                        |
| 3    | 8.97  | 79.6    | 2   | 14/25            | M92m K97k      | (K)YLSAFmPLK(D)    | 1295.7432                       | 130.0257                   | -8.5                        | 56194.0/6.29       | HUMAN   | RQ15172     | REVERSE Serine/threonine-protein phosphatase 2A 56 kDa regulatory subunit alpha isoform OS=Homo sapiens GN=PPP2R5A PE=1 SV=1 |
| 4    | 8.88  | 77.5    | 5   | 13/25            | K1969k K1971k  | (K)AYIPDLFKsk(T)   | 1197.6849                       | 228.0840                   | 11240.7                     | 305413.8/5.90      | HUMAN   | Q8TD26      | Chromodomain-helicase-DNA-binding protein 6 OS=Homo sapiens GN=CHD6 PE=1 SV=3                                                |
| 5    | 7.70  | 72.6    | 2   | 15/25            | None           | (K)YLSNSLDKATGK(Y) | 1425.7919                       | -0.0229                    | -16.1                       | 116454.0/7.92      | HUMAN   | RO76041     | REVERSE Nebulette OS=Homo sapiens GN=NEBL PE=1 SV=1                                                                          |

Detailed Results

| Rank                                                                                                                                                                                                                                                                                                                                                                                                                                                                                                                                                                                                                                                                                                                                                                                                                                                                                                                                                                                                                                                                                                                                                                                                                                                                                                                                                                                                                                                                                                                                                                                                                                                                                                                                                                                                                                                                                                                                                                                                                                                                                                                                                                                                                                                                                                                                                                                                                                                                                                                                    | Score  | SPI (%) | BCS     | # Unmatched Ions | Variable sites | Sequence         | MH <sup>+</sup> Calculated (Da) | MH <sup>+</sup> Error (Da) | MH <sup>+</sup> Error (ppm) | Protein MW/PI (Da) | Species | Accession # | MS-Digest Index # | Protein Name                                                                          |                       |         |                       |                       |         |         |         |                  |         |          |          |         |         |         |         |                       |         |                       |                       |         |         |         |         |         |          |          |                         |      |      |      |      |      |       |      |      |      |      |      |      |      |      |      |      |      |       |      |      |      |      |      |      |       |                       |      |      |      |      |      |        |       |       |      |      |      |       |      |      |       |      |      |       |       |      |      |      |      |       |       |       |      |      |      |      |      |      |       |      |       |       |       |      |       |       |      |       |      |      |       |       |       |       |       |      |      |          |    |    |        |    |    |    |  |    |  |  |    |  |  |  |                  |  |                      |  |  |  |  |                  |  |    |    |           |      |      |      |     |      |      |  |      |  |  |      |  |  |  |       |  |       |  |  |  |  |       |  |       |       |
|-----------------------------------------------------------------------------------------------------------------------------------------------------------------------------------------------------------------------------------------------------------------------------------------------------------------------------------------------------------------------------------------------------------------------------------------------------------------------------------------------------------------------------------------------------------------------------------------------------------------------------------------------------------------------------------------------------------------------------------------------------------------------------------------------------------------------------------------------------------------------------------------------------------------------------------------------------------------------------------------------------------------------------------------------------------------------------------------------------------------------------------------------------------------------------------------------------------------------------------------------------------------------------------------------------------------------------------------------------------------------------------------------------------------------------------------------------------------------------------------------------------------------------------------------------------------------------------------------------------------------------------------------------------------------------------------------------------------------------------------------------------------------------------------------------------------------------------------------------------------------------------------------------------------------------------------------------------------------------------------------------------------------------------------------------------------------------------------------------------------------------------------------------------------------------------------------------------------------------------------------------------------------------------------------------------------------------------------------------------------------------------------------------------------------------------------------------------------------------------------------------------------------------------------|--------|---------|---------|------------------|----------------|------------------|---------------------------------|----------------------------|-----------------------------|--------------------|---------|-------------|-------------------|---------------------------------------------------------------------------------------|-----------------------|---------|-----------------------|-----------------------|---------|---------|---------|------------------|---------|----------|----------|---------|---------|---------|---------|-----------------------|---------|-----------------------|-----------------------|---------|---------|---------|---------|---------|----------|----------|-------------------------|------|------|------|------|------|-------|------|------|------|------|------|------|------|------|------|------|------|-------|------|------|------|------|------|------|-------|-----------------------|------|------|------|------|------|--------|-------|-------|------|------|------|-------|------|------|-------|------|------|-------|-------|------|------|------|------|-------|-------|-------|------|------|------|------|------|------|-------|------|-------|-------|-------|------|-------|-------|------|-------|------|------|-------|-------|-------|-------|-------|------|------|----------|----|----|--------|----|----|----|--|----|--|--|----|--|--|--|------------------|--|----------------------|--|--|--|--|------------------|--|----|----|-----------|------|------|------|-----|------|------|--|------|--|--|------|--|--|--|-------|--|-------|--|--|--|--|-------|--|-------|-------|
| 1                                                                                                                                                                                                                                                                                                                                                                                                                                                                                                                                                                                                                                                                                                                                                                                                                                                                                                                                                                                                                                                                                                                                                                                                                                                                                                                                                                                                                                                                                                                                                                                                                                                                                                                                                                                                                                                                                                                                                                                                                                                                                                                                                                                                                                                                                                                                                                                                                                                                                                                                       | 11.09  | 82.0    | 3       | 12/25            | K224k          | (K)YLSFLEKROK(L) | 1311.7419                       | 114.0270                   | -11.2                       | 58305.1/5.50       | HUMAN   | Q8NHP7      | 201371            | Exonuclease 3'-5' domain-like-containing protein 1 OS=Homo sapiens GN=EXDL1 PE=2 SV=3 |                       |         |                       |                       |         |         |         |                  |         |          |          |         |         |         |         |                       |         |                       |                       |         |         |         |         |         |          |          |                         |      |      |      |      |      |       |      |      |      |      |      |      |      |      |      |      |      |       |      |      |      |      |      |      |       |                       |      |      |      |      |      |        |       |       |      |      |      |       |      |      |       |      |      |       |       |      |      |      |      |       |       |       |      |      |      |      |      |      |       |      |       |       |       |      |       |       |      |       |      |      |       |       |       |       |       |      |      |          |    |    |        |    |    |    |  |    |  |  |    |  |  |  |                  |  |                      |  |  |  |  |                  |  |    |    |           |      |      |      |     |      |      |  |      |  |  |      |  |  |  |       |  |       |  |  |  |  |       |  |       |       |
| <table border="1"> <thead> <tr> <th>Fragment-ion (m/z)</th> <th>70.066</th> <th>86.098</th> <th>130.089</th> <th>136.078</th> <th>147.115</th> <th>249.166</th> <th>250.170</th> <th>277.161</th> <th>278.164</th> <th>310.184</th> <th>341.152</th> <th>364.193</th> <th>423.270</th> <th>523.276</th> <th>531.792<sup>+2</sup></th> <th>538.301</th> <th>566.307<sup>+2</sup></th> <th>575.307<sup>+2</sup></th> <th>609.342</th> <th>722.421</th> <th>727.342</th> <th>850.486</th> <th>965.524</th> <th>1062.567</th> <th>1149.600</th> </tr> </thead> <tbody> <tr> <td>Frac. Inten. (% of TIC)</td> <td>0.00</td> <td>0.20</td> <td>0.95</td> <td>0.34</td> <td>1.53</td> <td>21.47</td> <td>2.91</td> <td>7.69</td> <td>1.31</td> <td>1.79</td> <td>1.33</td> <td>4.62</td> <td>0.99</td> <td>1.11</td> <td>7.45</td> <td>1.11</td> <td>1.67</td> <td>14.51</td> <td>2.17</td> <td>1.70</td> <td>0.96</td> <td>1.14</td> <td>1.47</td> <td>8.06</td> <td>13.55</td> </tr> <tr> <td>Rel. Inten. (% of BP)</td> <td>0.00</td> <td>0.93</td> <td>4.40</td> <td>1.56</td> <td>7.11</td> <td>100.00</td> <td>13.53</td> <td>35.79</td> <td>6.08</td> <td>8.33</td> <td>6.19</td> <td>21.52</td> <td>4.59</td> <td>5.17</td> <td>34.68</td> <td>5.18</td> <td>7.79</td> <td>67.60</td> <td>10.10</td> <td>7.92</td> <td>4.45</td> <td>5.32</td> <td>6.84</td> <td>37.51</td> <td>63.11</td> </tr> <tr> <td>Score</td> <td>0.20</td> <td>0.22</td> <td>0.50</td> <td>1.00</td> <td>1.50</td> <td>0.50</td> <td>-0.14</td> <td>0.50</td> <td>-0.06</td> <td>-0.08</td> <td>-0.06</td> <td>0.50</td> <td>-0.05</td> <td>-0.05</td> <td>1.50</td> <td>-0.05</td> <td>1.50</td> <td>1.50</td> <td>-0.10</td> <td>-0.08</td> <td>-0.04</td> <td>-0.05</td> <td>-0.07</td> <td>1.50</td> <td>1.50</td> </tr> <tr> <td>Ion-type</td> <td>PR</td> <td>LI</td> <td>y1-NH3</td> <td>a1</td> <td>y1</td> <td>a2</td> <td></td> <td>b2</td> <td></td> <td></td> <td>b3</td> <td></td> <td></td> <td></td> <td>y7<sup>+2</sup></td> <td></td> <td>ye-H2O<sup>+2</sup></td> <td></td> <td></td> <td></td> <td></td> <td>ye<sup>+2</sup></td> <td></td> <td>y7</td> <td>ye</td> </tr> <tr> <td>Delta ppm</td> <td>18.2</td> <td>13.6</td> <td>17.3</td> <td>8.9</td> <td>17.6</td> <td>18.7</td> <td></td> <td>18.5</td> <td></td> <td></td> <td>15.4</td> <td></td> <td></td> <td></td> <td>-27.2</td> <td></td> <td>-17.5</td> <td></td> <td></td> <td></td> <td></td> <td>-27.3</td> <td></td> <td>-35.8</td> <td>-32.5</td> </tr> </tbody> </table> |        |         |         |                  |                |                  |                                 |                            |                             |                    |         |             |                   |                                                                                       | Fragment-ion (m/z)    | 70.066  | 86.098                | 130.089               | 136.078 | 147.115 | 249.166 | 250.170          | 277.161 | 278.164  | 310.184  | 341.152 | 364.193 | 423.270 | 523.276 | 531.792 <sup>+2</sup> | 538.301 | 566.307 <sup>+2</sup> | 575.307 <sup>+2</sup> | 609.342 | 722.421 | 727.342 | 850.486 | 965.524 | 1062.567 | 1149.600 | Frac. Inten. (% of TIC) | 0.00 | 0.20 | 0.95 | 0.34 | 1.53 | 21.47 | 2.91 | 7.69 | 1.31 | 1.79 | 1.33 | 4.62 | 0.99 | 1.11 | 7.45 | 1.11 | 1.67 | 14.51 | 2.17 | 1.70 | 0.96 | 1.14 | 1.47 | 8.06 | 13.55 | Rel. Inten. (% of BP) | 0.00 | 0.93 | 4.40 | 1.56 | 7.11 | 100.00 | 13.53 | 35.79 | 6.08 | 8.33 | 6.19 | 21.52 | 4.59 | 5.17 | 34.68 | 5.18 | 7.79 | 67.60 | 10.10 | 7.92 | 4.45 | 5.32 | 6.84 | 37.51 | 63.11 | Score | 0.20 | 0.22 | 0.50 | 1.00 | 1.50 | 0.50 | -0.14 | 0.50 | -0.06 | -0.08 | -0.06 | 0.50 | -0.05 | -0.05 | 1.50 | -0.05 | 1.50 | 1.50 | -0.10 | -0.08 | -0.04 | -0.05 | -0.07 | 1.50 | 1.50 | Ion-type | PR | LI | y1-NH3 | a1 | y1 | a2 |  | b2 |  |  | b3 |  |  |  | y7 <sup>+2</sup> |  | ye-H2O <sup>+2</sup> |  |  |  |  | ye <sup>+2</sup> |  | y7 | ye | Delta ppm | 18.2 | 13.6 | 17.3 | 8.9 | 17.6 | 18.7 |  | 18.5 |  |  | 15.4 |  |  |  | -27.2 |  | -17.5 |  |  |  |  | -27.3 |  | -35.8 | -32.5 |
| Fragment-ion (m/z)                                                                                                                                                                                                                                                                                                                                                                                                                                                                                                                                                                                                                                                                                                                                                                                                                                                                                                                                                                                                                                                                                                                                                                                                                                                                                                                                                                                                                                                                                                                                                                                                                                                                                                                                                                                                                                                                                                                                                                                                                                                                                                                                                                                                                                                                                                                                                                                                                                                                                                                      | 70.066 | 86.098  | 130.089 | 136.078          | 147.115        | 249.166          | 250.170                         | 277.161                    | 278.164                     | 310.184            | 341.152 | 364.193     | 423.270           | 523.276                                                                               | 531.792 <sup>+2</sup> | 538.301 | 566.307 <sup>+2</sup> | 575.307 <sup>+2</sup> | 609.342 | 722.421 | 727.342 | 850.486          | 965.524 | 1062.567 | 1149.600 |         |         |         |         |                       |         |                       |                       |         |         |         |         |         |          |          |                         |      |      |      |      |      |       |      |      |      |      |      |      |      |      |      |      |      |       |      |      |      |      |      |      |       |                       |      |      |      |      |      |        |       |       |      |      |      |       |      |      |       |      |      |       |       |      |      |      |      |       |       |       |      |      |      |      |      |      |       |      |       |       |       |      |       |       |      |       |      |      |       |       |       |       |       |      |      |          |    |    |        |    |    |    |  |    |  |  |    |  |  |  |                  |  |                      |  |  |  |  |                  |  |    |    |           |      |      |      |     |      |      |  |      |  |  |      |  |  |  |       |  |       |  |  |  |  |       |  |       |       |
| Frac. Inten. (% of TIC)                                                                                                                                                                                                                                                                                                                                                                                                                                                                                                                                                                                                                                                                                                                                                                                                                                                                                                                                                                                                                                                                                                                                                                                                                                                                                                                                                                                                                                                                                                                                                                                                                                                                                                                                                                                                                                                                                                                                                                                                                                                                                                                                                                                                                                                                                                                                                                                                                                                                                                                 | 0.00   | 0.20    | 0.95    | 0.34             | 1.53           | 21.47            | 2.91                            | 7.69                       | 1.31                        | 1.79               | 1.33    | 4.62        | 0.99              | 1.11                                                                                  | 7.45                  | 1.11    | 1.67                  | 14.51                 | 2.17    | 1.70    | 0.96    | 1.14             | 1.47    | 8.06     | 13.55    |         |         |         |         |                       |         |                       |                       |         |         |         |         |         |          |          |                         |      |      |      |      |      |       |      |      |      |      |      |      |      |      |      |      |      |       |      |      |      |      |      |      |       |                       |      |      |      |      |      |        |       |       |      |      |      |       |      |      |       |      |      |       |       |      |      |      |      |       |       |       |      |      |      |      |      |      |       |      |       |       |       |      |       |       |      |       |      |      |       |       |       |       |       |      |      |          |    |    |        |    |    |    |  |    |  |  |    |  |  |  |                  |  |                      |  |  |  |  |                  |  |    |    |           |      |      |      |     |      |      |  |      |  |  |      |  |  |  |       |  |       |  |  |  |  |       |  |       |       |
| Rel. Inten. (% of BP)                                                                                                                                                                                                                                                                                                                                                                                                                                                                                                                                                                                                                                                                                                                                                                                                                                                                                                                                                                                                                                                                                                                                                                                                                                                                                                                                                                                                                                                                                                                                                                                                                                                                                                                                                                                                                                                                                                                                                                                                                                                                                                                                                                                                                                                                                                                                                                                                                                                                                                                   | 0.00   | 0.93    | 4.40    | 1.56             | 7.11           | 100.00           | 13.53                           | 35.79                      | 6.08                        | 8.33               | 6.19    | 21.52       | 4.59              | 5.17                                                                                  | 34.68                 | 5.18    | 7.79                  | 67.60                 | 10.10   | 7.92    | 4.45    | 5.32             | 6.84    | 37.51    | 63.11    |         |         |         |         |                       |         |                       |                       |         |         |         |         |         |          |          |                         |      |      |      |      |      |       |      |      |      |      |      |      |      |      |      |      |      |       |      |      |      |      |      |      |       |                       |      |      |      |      |      |        |       |       |      |      |      |       |      |      |       |      |      |       |       |      |      |      |      |       |       |       |      |      |      |      |      |      |       |      |       |       |       |      |       |       |      |       |      |      |       |       |       |       |       |      |      |          |    |    |        |    |    |    |  |    |  |  |    |  |  |  |                  |  |                      |  |  |  |  |                  |  |    |    |           |      |      |      |     |      |      |  |      |  |  |      |  |  |  |       |  |       |  |  |  |  |       |  |       |       |
| Score                                                                                                                                                                                                                                                                                                                                                                                                                                                                                                                                                                                                                                                                                                                                                                                                                                                                                                                                                                                                                                                                                                                                                                                                                                                                                                                                                                                                                                                                                                                                                                                                                                                                                                                                                                                                                                                                                                                                                                                                                                                                                                                                                                                                                                                                                                                                                                                                                                                                                                                                   | 0.20   | 0.22    | 0.50    | 1.00             | 1.50           | 0.50             | -0.14                           | 0.50                       | -0.06                       | -0.08              | -0.06   | 0.50        | -0.05             | -0.05                                                                                 | 1.50                  | -0.05   | 1.50                  | 1.50                  | -0.10   | -0.08   | -0.04   | -0.05            | -0.07   | 1.50     | 1.50     |         |         |         |         |                       |         |                       |                       |         |         |         |         |         |          |          |                         |      |      |      |      |      |       |      |      |      |      |      |      |      |      |      |      |      |       |      |      |      |      |      |      |       |                       |      |      |      |      |      |        |       |       |      |      |      |       |      |      |       |      |      |       |       |      |      |      |      |       |       |       |      |      |      |      |      |      |       |      |       |       |       |      |       |       |      |       |      |      |       |       |       |       |       |      |      |          |    |    |        |    |    |    |  |    |  |  |    |  |  |  |                  |  |                      |  |  |  |  |                  |  |    |    |           |      |      |      |     |      |      |  |      |  |  |      |  |  |  |       |  |       |  |  |  |  |       |  |       |       |
| Ion-type                                                                                                                                                                                                                                                                                                                                                                                                                                                                                                                                                                                                                                                                                                                                                                                                                                                                                                                                                                                                                                                                                                                                                                                                                                                                                                                                                                                                                                                                                                                                                                                                                                                                                                                                                                                                                                                                                                                                                                                                                                                                                                                                                                                                                                                                                                                                                                                                                                                                                                                                | PR     | LI      | y1-NH3  | a1               | y1             | a2               |                                 | b2                         |                             |                    | b3      |             |                   |                                                                                       | y7 <sup>+2</sup>      |         | ye-H2O <sup>+2</sup>  |                       |         |         |         | ye <sup>+2</sup> |         | y7       | ye       |         |         |         |         |                       |         |                       |                       |         |         |         |         |         |          |          |                         |      |      |      |      |      |       |      |      |      |      |      |      |      |      |      |      |      |       |      |      |      |      |      |      |       |                       |      |      |      |      |      |        |       |       |      |      |      |       |      |      |       |      |      |       |       |      |      |      |      |       |       |       |      |      |      |      |      |      |       |      |       |       |       |      |       |       |      |       |      |      |       |       |       |       |       |      |      |          |    |    |        |    |    |    |  |    |  |  |    |  |  |  |                  |  |                      |  |  |  |  |                  |  |    |    |           |      |      |      |     |      |      |  |      |  |  |      |  |  |  |       |  |       |  |  |  |  |       |  |       |       |
| Delta ppm                                                                                                                                                                                                                                                                                                                                                                                                                                                                                                                                                                                                                                                                                                                                                                                                                                                                                                                                                                                                                                                                                                                                                                                                                                                                                                                                                                                                                                                                                                                                                                                                                                                                                                                                                                                                                                                                                                                                                                                                                                                                                                                                                                                                                                                                                                                                                                                                                                                                                                                               | 18.2   | 13.6    | 17.3    | 8.9              | 17.6           | 18.7             |                                 | 18.5                       |                             |                    | 15.4    |             |                   |                                                                                       | -27.2                 |         | -17.5                 |                       |         |         |         | -27.3            |         | -35.8    | -32.5    |         |         |         |         |                       |         |                       |                       |         |         |         |         |         |          |          |                         |      |      |      |      |      |       |      |      |      |      |      |      |      |      |      |      |      |       |      |      |      |      |      |      |       |                       |      |      |      |      |      |        |       |       |      |      |      |       |      |      |       |      |      |       |       |      |      |      |      |       |       |       |      |      |      |      |      |      |       |      |       |       |       |      |       |       |      |       |      |      |       |       |       |       |       |      |      |          |    |    |        |    |    |    |  |    |  |  |    |  |  |  |                  |  |                      |  |  |  |  |                  |  |    |    |           |      |      |      |     |      |      |  |      |  |  |      |  |  |  |       |  |       |  |  |  |  |       |  |       |       |

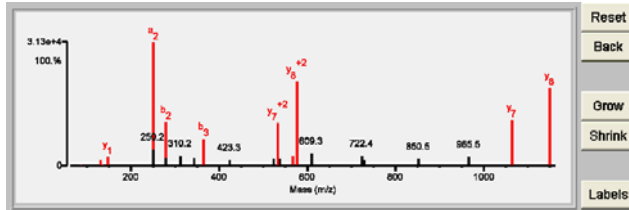

Result Summary

| Rank | Score | SPI (%) | BCS | # Unmatched Ions | # Variable sites | Sequence                | MH <sup>+</sup> Calculated (Da) | MH <sup>+</sup> Error (Da) | MH <sup>+</sup> Error (ppm) | Protein MW/pl (Da) | Species | Accession # | Protein Name                                              |
|------|-------|---------|-----|------------------|------------------|-------------------------|---------------------------------|----------------------------|-----------------------------|--------------------|---------|-------------|-----------------------------------------------------------|
| 1    | 12.97 | 70.9    | 8   | 7/24             | K157K            | (K)TGDVEDSTVLkSLHLPK(N) | 1838.9858                       | 114.0584                   | 7.9                         | 73954.5/4.81       | HUMAN   | Q9UNN5      | FAS-associated factor 1 OS=Homo sapiens GN=FAF1 PE=1 SV=2 |
| 2    | 8.28  | 56.7    | 5   | 9/24             | K163K            | (K)TGDVEDSTVLkSLHLPK(N) | 1838.9858                       | 114.0584                   | 7.9                         | 73954.5/4.81       | HUMAN   | Q9UNN5      | FAS-associated factor 1 OS=Homo sapiens GN=FAF1 PE=1 SV=2 |

Detailed Results

| Rank | Score | SPI (%) | BCS | # Unmatched Ions | # Variable sites | Sequence                         | MH <sup>+</sup> Calculated (Da) | MH <sup>+</sup> Error (Da) | MH <sup>+</sup> Error (ppm) | Protein MW/pl (Da) | Species | Accession # | MS-Digest Index # | Protein Name                                              |
|------|-------|---------|-----|------------------|------------------|----------------------------------|---------------------------------|----------------------------|-----------------------------|--------------------|---------|-------------|-------------------|-----------------------------------------------------------|
| 1    | 12.97 | 70.9    | 8   | 7/24             | K157K            | (K)TGDVEDSTVLDSEITVLRKSLHLPLR(N) | 1838.9858                       | 114.0584                   | 7.9                         | 73954.5/4.81       | HUMAN   | Q9UNN5      | 208781            | FAS-associated factor 1 OS=Homo sapiens GN=FAF1 PE=1 SV=2 |

  

| Fragment-ion (m/z)      | 60.043 | 70.065 | 72.080 | 74.060 | 84.044 | 84.080 | 86.095 | 102.054 | 110.069 | 120.079 | 129.101 | 159.075 | 173.126 | 185.163 | 187.108 | 244.165 | 251.150 | 274.104 | 338.183 <sup>+2</sup> | 451.262 | 459.292 | 525.330 <sup>+2</sup> | 574.868 <sup>+2</sup> | 694.428 |
|-------------------------|--------|--------|--------|--------|--------|--------|--------|---------|---------|---------|---------|---------|---------|---------|---------|---------|---------|---------|-----------------------|---------|---------|-----------------------|-----------------------|---------|
| Frac. Inten. (% of TIC) | 4.50   | 0.01   | 0.82   | 20.70  | 0.31   | 0.69   | 0.65   | 0.19    | 0.16    | 4.04    | 0.19    | 3.45    | 3.76    | 3.46    | 6.16    | 10.59   | 4.51    | 8.23    | 3.90                  | 4.35    | 3.32    | 8.70                  | 3.76                  | 3.56    |
| Rel. Inten. (% of BP)   | 21.73  | 0.03   | 3.94   | 100.00 | 1.52   | 3.34   | 3.15   | 0.90    | 0.78    | 19.51   | 0.93    | 16.64   | 18.18   | 16.70   | 29.73   | 51.17   | 21.78   | 39.74   | 18.82                 | 21.02   | 16.04   | 42.04                 | 18.17                 | 17.18   |
| Score                   | -0.22  | 0.20   | 0.50   | 1.50   | 1.00   | 0.50   | 0.22   | 1.00    | 1.00    | -0.20   | 0.20    | 0.50    | -0.18   | -0.17   | -0.30   | 1.50    | 0.75    | 0.50    | -0.19                 | 0.75    | -0.16   | 1.50                  | 1.50                  | 1.50    |
| Ion-type                |        | PR     | V      | a1     | b1+H2O | KQ     | LI     | b1      | H       | RKQ     | b2      |         |         |         |         | y2      | HL      | b3      |                       | SLHL    |         | y6 <sup>+2</sup>      | y9 <sup>+2</sup>      | y6      |
| Delta ppm               |        | -7.5   | -8.0   | -18.1  | -17.7  | -5.7   | -11.9  | -19.1   | -20.7   |         | -8.8    | -16.4   |         |         |         | -4.4    | -7.0    | -2.0    |                       | -12.5   |         | 6.6                   | 11.4                  | 4.3     |

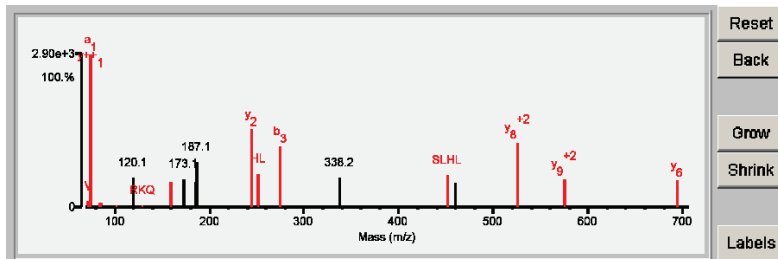

Result Summary

| Rank | Score | SPI (%) | BCS | # Unmatched ions | # Variable sites | Sequence            | MH <sup>+</sup> Calculated (Da) | MH <sup>+</sup> Error (Da) | MH <sup>+</sup> Error (ppm) | Protein MW/pi (Da) | Species | Accession # | Protein Name                                                                |
|------|-------|---------|-----|------------------|------------------|---------------------|---------------------------------|----------------------------|-----------------------------|--------------------|---------|-------------|-----------------------------------------------------------------------------|
| 1    | 13.98 | 79.2    | 6   | 7/25             | K457k            | (K)TDQFPLFLIMGkR(S) | 1678.9349                       | 114.0552                   | 6.9                         | 73954.5/4.81       | HUMAN   | Q9UNNS      | FAS-associated factor 1 OS=Homo sapiens GN=FAF1 PE=1 SV=2                   |
| 2    | 5.97  | 62.5    | 2   | 14/25            | K386k            | (R)SLIFEKISKSEER(R) | 1678.9374                       | 114.0527                   | 5.5                         | 78569.0/8.45       | HUMAN   | Q8IZF7      | Probable G-protein coupled receptor 111 OS=Homo sapiens GN=GPR111 PE=2 SV=1 |

Detailed Results

| Rank                                                                                                                                                                                                                                                                                                                                                                                                                                                                                                                                                                                                                                                                                                                                                                                                                                                                                                                                                                                                                                                                                                                                                                                                                                                                                                                                                                                                                                                                                                                                                                                                                                                                                                                                                                                                                                                                                                                                                                                                                                                                                                                                                                                                                                                                                                                                                                                                                                                                                       | Score  | SPI (%) | BCS    | # Unmatched ions | # Variable sites | Sequence                                     | MH <sup>+</sup> Calculated (Da) | MH <sup>+</sup> Error (Da) | MH <sup>+</sup> Error (ppm) | Protein MW/pi (Da) | Species | Accession # | MS-Digest Index # | Protein Name                                              |                    |         |         |         |         |         |                   |         |         |         |         |         |         |         |         |         |         |         |         |         |         |           |         |         |         |         |                         |      |      |      |      |      |      |      |      |      |      |      |      |      |      |       |      |      |       |      |       |      |      |      |      |      |                       |      |      |      |      |       |      |       |       |       |       |       |       |       |       |       |       |       |       |       |        |       |       |       |       |       |       |      |  |      |      |       |      |       |       |      |      |      |      |       |      |      |       |       |      |       |      |      |      |      |      |      |          |    |  |    |    |    |   |  |  |       |    |    |    |  |     |    |  |  |    |  |    |                   |    |    |    |    |           |      |  |       |       |  |       |  |  |     |       |       |      |  |     |      |  |  |     |  |     |      |      |      |      |      |
|--------------------------------------------------------------------------------------------------------------------------------------------------------------------------------------------------------------------------------------------------------------------------------------------------------------------------------------------------------------------------------------------------------------------------------------------------------------------------------------------------------------------------------------------------------------------------------------------------------------------------------------------------------------------------------------------------------------------------------------------------------------------------------------------------------------------------------------------------------------------------------------------------------------------------------------------------------------------------------------------------------------------------------------------------------------------------------------------------------------------------------------------------------------------------------------------------------------------------------------------------------------------------------------------------------------------------------------------------------------------------------------------------------------------------------------------------------------------------------------------------------------------------------------------------------------------------------------------------------------------------------------------------------------------------------------------------------------------------------------------------------------------------------------------------------------------------------------------------------------------------------------------------------------------------------------------------------------------------------------------------------------------------------------------------------------------------------------------------------------------------------------------------------------------------------------------------------------------------------------------------------------------------------------------------------------------------------------------------------------------------------------------------------------------------------------------------------------------------------------------|--------|---------|--------|------------------|------------------|----------------------------------------------|---------------------------------|----------------------------|-----------------------------|--------------------|---------|-------------|-------------------|-----------------------------------------------------------|--------------------|---------|---------|---------|---------|---------|-------------------|---------|---------|---------|---------|---------|---------|---------|---------|---------|---------|---------|---------|---------|---------|-----------|---------|---------|---------|---------|-------------------------|------|------|------|------|------|------|------|------|------|------|------|------|------|------|-------|------|------|-------|------|-------|------|------|------|------|------|-----------------------|------|------|------|------|-------|------|-------|-------|-------|-------|-------|-------|-------|-------|-------|-------|-------|-------|-------|--------|-------|-------|-------|-------|-------|-------|------|--|------|------|-------|------|-------|-------|------|------|------|------|-------|------|------|-------|-------|------|-------|------|------|------|------|------|------|----------|----|--|----|----|----|---|--|--|-------|----|----|----|--|-----|----|--|--|----|--|----|-------------------|----|----|----|----|-----------|------|--|-------|-------|--|-------|--|--|-----|-------|-------|------|--|-----|------|--|--|-----|--|-----|------|------|------|------|------|
| 1                                                                                                                                                                                                                                                                                                                                                                                                                                                                                                                                                                                                                                                                                                                                                                                                                                                                                                                                                                                                                                                                                                                                                                                                                                                                                                                                                                                                                                                                                                                                                                                                                                                                                                                                                                                                                                                                                                                                                                                                                                                                                                                                                                                                                                                                                                                                                                                                                                                                                          | 13.98  | 79.2    | 6      | 7/25             | K457k            | (K)T D Q / F P L F L I I / I / M / G k R (S) | 1678.9349                       | 114.0552                   | 6.9                         | 73954.5/4.81       | HUMAN   | Q9UNNS      | 208781            | FAS-associated factor 1 OS=Homo sapiens GN=FAF1 PE=1 SV=2 |                    |         |         |         |         |         |                   |         |         |         |         |         |         |         |         |         |         |         |         |         |         |           |         |         |         |         |                         |      |      |      |      |      |      |      |      |      |      |      |      |      |      |       |      |      |       |      |       |      |      |      |      |      |                       |      |      |      |      |       |      |       |       |       |       |       |       |       |       |       |       |       |       |       |        |       |       |       |       |       |       |      |  |      |      |       |      |       |       |      |      |      |      |       |      |      |       |       |      |       |      |      |      |      |      |      |          |    |  |    |    |    |   |  |  |       |    |    |    |  |     |    |  |  |    |  |    |                   |    |    |    |    |           |      |  |       |       |  |       |  |  |     |       |       |      |  |     |      |  |  |     |  |     |      |      |      |      |      |
| <table border="1"> <thead> <tr> <th>Fragment-ion (m/z)</th> <th>70.065</th> <th>84.080</th> <th>86.095</th> <th>101.069</th> <th>104.051</th> <th>120.079</th> <th>171.078</th> <th>175.111</th> <th>183.151</th> <th>189.083</th> <th>211.140</th> <th>245.133</th> <th>439.245</th> <th>471.303</th> <th>474.278</th> <th>523.287</th> <th>572.273</th> <th>605.320</th> <th>700.348</th> <th>718.404</th> <th>724.933*2</th> <th>831.498</th> <th>849.409</th> <th>944.587</th> <th>962.527</th> </tr> </thead> <tbody> <tr> <td>Frac. Inten. (% of TIC)</td> <td>0.00</td> <td>0.14</td> <td>0.83</td> <td>0.14</td> <td>3.77</td> <td>0.18</td> <td>2.53</td> <td>3.96</td> <td>4.21</td> <td>2.06</td> <td>2.90</td> <td>2.05</td> <td>2.46</td> <td>2.41</td> <td>10.98</td> <td>2.05</td> <td>2.44</td> <td>16.21</td> <td>3.56</td> <td>17.43</td> <td>2.17</td> <td>7.48</td> <td>2.52</td> <td>3.63</td> <td>3.87</td> </tr> <tr> <td>Rel. Inten. (% of BP)</td> <td>0.03</td> <td>0.83</td> <td>4.74</td> <td>0.83</td> <td>21.64</td> <td>1.03</td> <td>14.54</td> <td>22.73</td> <td>24.17</td> <td>11.80</td> <td>16.64</td> <td>11.74</td> <td>14.11</td> <td>13.83</td> <td>62.98</td> <td>11.74</td> <td>13.99</td> <td>93.00</td> <td>20.44</td> <td>100.00</td> <td>12.47</td> <td>42.91</td> <td>14.46</td> <td>20.80</td> <td>22.18</td> </tr> <tr> <td>Score</td> <td>0.20</td> <td></td> <td>0.22</td> <td>0.50</td> <td>-0.22</td> <td>1.00</td> <td>-0.15</td> <td>-0.23</td> <td>0.50</td> <td>0.50</td> <td>0.75</td> <td>0.75</td> <td>-0.14</td> <td>0.75</td> <td>1.50</td> <td>-0.12</td> <td>-0.14</td> <td>1.50</td> <td>-0.20</td> <td>1.50</td> <td>1.50</td> <td>1.50</td> <td>0.50</td> <td>1.50</td> <td>0.50</td> </tr> <tr> <td>Ion-type</td> <td>PR</td> <td></td> <td>QK</td> <td>LI</td> <td>QK</td> <td>F</td> <td></td> <td></td> <td>PL-28</td> <td>a2</td> <td>PL</td> <td>IM</td> <td></td> <td>LIM</td> <td>y3</td> <td></td> <td></td> <td>y4</td> <td></td> <td>y5</td> <td>y11<sup>+2</sup></td> <td>y6</td> <td>br</td> <td>y7</td> <td>bs</td> </tr> <tr> <td>Delta ppm</td> <td>-6.1</td> <td></td> <td>-20.0</td> <td>-21.2</td> <td></td> <td>-14.8</td> <td></td> <td></td> <td>2.8</td> <td>-29.0</td> <td>-25.1</td> <td>-1.3</td> <td></td> <td>3.1</td> <td>-0.0</td> <td></td> <td></td> <td>2.2</td> <td></td> <td>1.7</td> <td>10.4</td> <td>13.2</td> <td>-6.9</td> <td>16.9</td> <td>29.1</td> </tr> </tbody> </table> |        |         |        |                  |                  |                                              |                                 |                            |                             |                    |         |             |                   |                                                           | Fragment-ion (m/z) | 70.065  | 84.080  | 86.095  | 101.069 | 104.051 | 120.079           | 171.078 | 175.111 | 183.151 | 189.083 | 211.140 | 245.133 | 439.245 | 471.303 | 474.278 | 523.287 | 572.273 | 605.320 | 700.348 | 718.404 | 724.933*2 | 831.498 | 849.409 | 944.587 | 962.527 | Frac. Inten. (% of TIC) | 0.00 | 0.14 | 0.83 | 0.14 | 3.77 | 0.18 | 2.53 | 3.96 | 4.21 | 2.06 | 2.90 | 2.05 | 2.46 | 2.41 | 10.98 | 2.05 | 2.44 | 16.21 | 3.56 | 17.43 | 2.17 | 7.48 | 2.52 | 3.63 | 3.87 | Rel. Inten. (% of BP) | 0.03 | 0.83 | 4.74 | 0.83 | 21.64 | 1.03 | 14.54 | 22.73 | 24.17 | 11.80 | 16.64 | 11.74 | 14.11 | 13.83 | 62.98 | 11.74 | 13.99 | 93.00 | 20.44 | 100.00 | 12.47 | 42.91 | 14.46 | 20.80 | 22.18 | Score | 0.20 |  | 0.22 | 0.50 | -0.22 | 1.00 | -0.15 | -0.23 | 0.50 | 0.50 | 0.75 | 0.75 | -0.14 | 0.75 | 1.50 | -0.12 | -0.14 | 1.50 | -0.20 | 1.50 | 1.50 | 1.50 | 0.50 | 1.50 | 0.50 | Ion-type | PR |  | QK | LI | QK | F |  |  | PL-28 | a2 | PL | IM |  | LIM | y3 |  |  | y4 |  | y5 | y11 <sup>+2</sup> | y6 | br | y7 | bs | Delta ppm | -6.1 |  | -20.0 | -21.2 |  | -14.8 |  |  | 2.8 | -29.0 | -25.1 | -1.3 |  | 3.1 | -0.0 |  |  | 2.2 |  | 1.7 | 10.4 | 13.2 | -6.9 | 16.9 | 29.1 |
| Fragment-ion (m/z)                                                                                                                                                                                                                                                                                                                                                                                                                                                                                                                                                                                                                                                                                                                                                                                                                                                                                                                                                                                                                                                                                                                                                                                                                                                                                                                                                                                                                                                                                                                                                                                                                                                                                                                                                                                                                                                                                                                                                                                                                                                                                                                                                                                                                                                                                                                                                                                                                                                                         | 70.065 | 84.080  | 86.095 | 101.069          | 104.051          | 120.079                                      | 171.078                         | 175.111                    | 183.151                     | 189.083            | 211.140 | 245.133     | 439.245           | 471.303                                                   | 474.278            | 523.287 | 572.273 | 605.320 | 700.348 | 718.404 | 724.933*2         | 831.498 | 849.409 | 944.587 | 962.527 |         |         |         |         |         |         |         |         |         |         |           |         |         |         |         |                         |      |      |      |      |      |      |      |      |      |      |      |      |      |      |       |      |      |       |      |       |      |      |      |      |      |                       |      |      |      |      |       |      |       |       |       |       |       |       |       |       |       |       |       |       |       |        |       |       |       |       |       |       |      |  |      |      |       |      |       |       |      |      |      |      |       |      |      |       |       |      |       |      |      |      |      |      |      |          |    |  |    |    |    |   |  |  |       |    |    |    |  |     |    |  |  |    |  |    |                   |    |    |    |    |           |      |  |       |       |  |       |  |  |     |       |       |      |  |     |      |  |  |     |  |     |      |      |      |      |      |
| Frac. Inten. (% of TIC)                                                                                                                                                                                                                                                                                                                                                                                                                                                                                                                                                                                                                                                                                                                                                                                                                                                                                                                                                                                                                                                                                                                                                                                                                                                                                                                                                                                                                                                                                                                                                                                                                                                                                                                                                                                                                                                                                                                                                                                                                                                                                                                                                                                                                                                                                                                                                                                                                                                                    | 0.00   | 0.14    | 0.83   | 0.14             | 3.77             | 0.18                                         | 2.53                            | 3.96                       | 4.21                        | 2.06               | 2.90    | 2.05        | 2.46              | 2.41                                                      | 10.98              | 2.05    | 2.44    | 16.21   | 3.56    | 17.43   | 2.17              | 7.48    | 2.52    | 3.63    | 3.87    |         |         |         |         |         |         |         |         |         |         |           |         |         |         |         |                         |      |      |      |      |      |      |      |      |      |      |      |      |      |      |       |      |      |       |      |       |      |      |      |      |      |                       |      |      |      |      |       |      |       |       |       |       |       |       |       |       |       |       |       |       |       |        |       |       |       |       |       |       |      |  |      |      |       |      |       |       |      |      |      |      |       |      |      |       |       |      |       |      |      |      |      |      |      |          |    |  |    |    |    |   |  |  |       |    |    |    |  |     |    |  |  |    |  |    |                   |    |    |    |    |           |      |  |       |       |  |       |  |  |     |       |       |      |  |     |      |  |  |     |  |     |      |      |      |      |      |
| Rel. Inten. (% of BP)                                                                                                                                                                                                                                                                                                                                                                                                                                                                                                                                                                                                                                                                                                                                                                                                                                                                                                                                                                                                                                                                                                                                                                                                                                                                                                                                                                                                                                                                                                                                                                                                                                                                                                                                                                                                                                                                                                                                                                                                                                                                                                                                                                                                                                                                                                                                                                                                                                                                      | 0.03   | 0.83    | 4.74   | 0.83             | 21.64            | 1.03                                         | 14.54                           | 22.73                      | 24.17                       | 11.80              | 16.64   | 11.74       | 14.11             | 13.83                                                     | 62.98              | 11.74   | 13.99   | 93.00   | 20.44   | 100.00  | 12.47             | 42.91   | 14.46   | 20.80   | 22.18   |         |         |         |         |         |         |         |         |         |         |           |         |         |         |         |                         |      |      |      |      |      |      |      |      |      |      |      |      |      |      |       |      |      |       |      |       |      |      |      |      |      |                       |      |      |      |      |       |      |       |       |       |       |       |       |       |       |       |       |       |       |       |        |       |       |       |       |       |       |      |  |      |      |       |      |       |       |      |      |      |      |       |      |      |       |       |      |       |      |      |      |      |      |      |          |    |  |    |    |    |   |  |  |       |    |    |    |  |     |    |  |  |    |  |    |                   |    |    |    |    |           |      |  |       |       |  |       |  |  |     |       |       |      |  |     |      |  |  |     |  |     |      |      |      |      |      |
| Score                                                                                                                                                                                                                                                                                                                                                                                                                                                                                                                                                                                                                                                                                                                                                                                                                                                                                                                                                                                                                                                                                                                                                                                                                                                                                                                                                                                                                                                                                                                                                                                                                                                                                                                                                                                                                                                                                                                                                                                                                                                                                                                                                                                                                                                                                                                                                                                                                                                                                      | 0.20   |         | 0.22   | 0.50             | -0.22            | 1.00                                         | -0.15                           | -0.23                      | 0.50                        | 0.50               | 0.75    | 0.75        | -0.14             | 0.75                                                      | 1.50               | -0.12   | -0.14   | 1.50    | -0.20   | 1.50    | 1.50              | 1.50    | 0.50    | 1.50    | 0.50    |         |         |         |         |         |         |         |         |         |         |           |         |         |         |         |                         |      |      |      |      |      |      |      |      |      |      |      |      |      |      |       |      |      |       |      |       |      |      |      |      |      |                       |      |      |      |      |       |      |       |       |       |       |       |       |       |       |       |       |       |       |       |        |       |       |       |       |       |       |      |  |      |      |       |      |       |       |      |      |      |      |       |      |      |       |       |      |       |      |      |      |      |      |      |          |    |  |    |    |    |   |  |  |       |    |    |    |  |     |    |  |  |    |  |    |                   |    |    |    |    |           |      |  |       |       |  |       |  |  |     |       |       |      |  |     |      |  |  |     |  |     |      |      |      |      |      |
| Ion-type                                                                                                                                                                                                                                                                                                                                                                                                                                                                                                                                                                                                                                                                                                                                                                                                                                                                                                                                                                                                                                                                                                                                                                                                                                                                                                                                                                                                                                                                                                                                                                                                                                                                                                                                                                                                                                                                                                                                                                                                                                                                                                                                                                                                                                                                                                                                                                                                                                                                                   | PR     |         | QK     | LI               | QK               | F                                            |                                 |                            | PL-28                       | a2                 | PL      | IM          |                   | LIM                                                       | y3                 |         |         | y4      |         | y5      | y11 <sup>+2</sup> | y6      | br      | y7      | bs      |         |         |         |         |         |         |         |         |         |         |           |         |         |         |         |                         |      |      |      |      |      |      |      |      |      |      |      |      |      |      |       |      |      |       |      |       |      |      |      |      |      |                       |      |      |      |      |       |      |       |       |       |       |       |       |       |       |       |       |       |       |       |        |       |       |       |       |       |       |      |  |      |      |       |      |       |       |      |      |      |      |       |      |      |       |       |      |       |      |      |      |      |      |      |          |    |  |    |    |    |   |  |  |       |    |    |    |  |     |    |  |  |    |  |    |                   |    |    |    |    |           |      |  |       |       |  |       |  |  |     |       |       |      |  |     |      |  |  |     |  |     |      |      |      |      |      |
| Delta ppm                                                                                                                                                                                                                                                                                                                                                                                                                                                                                                                                                                                                                                                                                                                                                                                                                                                                                                                                                                                                                                                                                                                                                                                                                                                                                                                                                                                                                                                                                                                                                                                                                                                                                                                                                                                                                                                                                                                                                                                                                                                                                                                                                                                                                                                                                                                                                                                                                                                                                  | -6.1   |         | -20.0  | -21.2            |                  | -14.8                                        |                                 |                            | 2.8                         | -29.0              | -25.1   | -1.3        |                   | 3.1                                                       | -0.0               |         |         | 2.2     |         | 1.7     | 10.4              | 13.2    | -6.9    | 16.9    | 29.1    |         |         |         |         |         |         |         |         |         |         |           |         |         |         |         |                         |      |      |      |      |      |      |      |      |      |      |      |      |      |      |       |      |      |       |      |       |      |      |      |      |      |                       |      |      |      |      |       |      |       |       |       |       |       |       |       |       |       |       |       |       |       |        |       |       |       |       |       |       |      |  |      |      |       |      |       |       |      |      |      |      |       |      |      |       |       |      |       |      |      |      |      |      |      |          |    |  |    |    |    |   |  |  |       |    |    |    |  |     |    |  |  |    |  |    |                   |    |    |    |    |           |      |  |       |       |  |       |  |  |     |       |       |      |  |     |      |  |  |     |  |     |      |      |      |      |      |

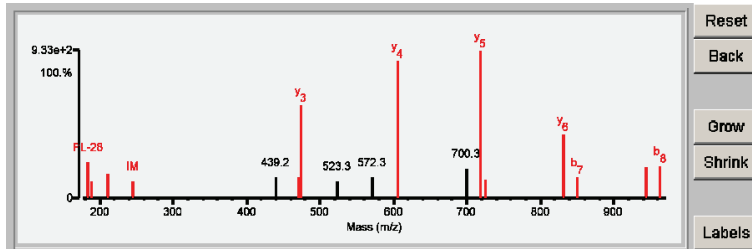

Result Summary

| Rank | Score | SPI (%) | BCS | # Unmatched Ions | Variable sites | Sequence                                       | MH <sup>+</sup> Calculated (Da) | MH <sup>+</sup> Error (Da) | MH <sup>+</sup> Error (ppm) | Protein MW/pl (Da) | Species | Accession # | Protein Name                                                        |
|------|-------|---------|-----|------------------|----------------|------------------------------------------------|---------------------------------|----------------------------|-----------------------------|--------------------|---------|-------------|---------------------------------------------------------------------|
| 1    | 21.54 | 91.2    | 12  | 4/25             | K28k           | (R)I V A P G K G I L A A D E S T G S I A K (R) | 1898.0593                       | 114.0544                   | 5.7                         | 39420.2/8.30       | HUMAN   | P04075      | Fructose-bisphosphate aldolase A OS=Homo sapiens GN=ALDOA PE=1 SV=2 |
| 2    | 3.67  | 63.0    | 2   | 16/25            | K42k           | (R)I V A P G K G I L A A D E S T G S I A K (R) | 1898.0593                       | 114.0544                   | 5.7                         | 39420.2/8.30       | HUMAN   | P04075      | Fructose-bisphosphate aldolase A OS=Homo sapiens GN=ALDOA PE=1 SV=2 |

Detailed Results

| Rank                                                                                                                                                                                                                                                                                                                                                                                                                                                                                                                                                                                                                                                                                                                                                                                                                                                                                                                                                                                                                                                                                                                                                                                                                                                                                                                                                                                                                                                                                                                                                                                                                                                                                                                                                                                                                                                                                                                                                                                                                                                                                                                                                                                                                                                                                                                                                                                                                                                                                                                                                                                                                                                                                                                                                                                                                                                                                                                                                                                                                                                                                                                                                                                                                                                                                                                                                                                                                                                                         | Score  | SPI (%) | BCS    | # Unmatched Ions | Variable sites | Sequence                                        | MH <sup>+</sup> Calculated (Da) | MH <sup>+</sup> Error (Da) | MH <sup>+</sup> Error (ppm) | Protein MW/pl (Da)    | Species | Accession # | MS-Digest Index # | Protein Name                                                        |                    |         |         |         |         |         |                       |                       |         |         |                       |         |         |         |         |         |         |         |         |         |         |                       |                       |         |         |          |                        |      |      |      |       |       |       |      |      |      |      |      |      |      |      |      |      |      |      |      |      |       |       |      |      |      |                      |      |      |      |       |       |       |       |       |       |       |       |       |       |       |       |       |       |       |       |       |        |       |       |       |       |       |      |      |      |      |      |      |      |      |       |       |      |      |      |      |      |      |      |       |      |       |      |      |      |      |      |          |    |   |    |    |    |    |    |    |  |  |      |    |       |    |                    |    |    |  |    |  |                   |                   |    |     |     |           |       |       |       |       |       |       |      |      |  |  |       |      |       |      |      |       |     |  |      |  |     |      |      |      |      |  |  |  |  |      |  |  |  |     |  |  |  |  |  |  |        |  |       |  |  |  |  |  |  |  |  |  |  |  |  |    |  |  |  |  |  |  |  |  |  |  |  |  |       |  |  |  |  |  |  |  |  |  |  |  |  |       |  |  |  |  |  |  |  |  |  |  |  |  |     |  |  |  |  |  |  |  |  |
|------------------------------------------------------------------------------------------------------------------------------------------------------------------------------------------------------------------------------------------------------------------------------------------------------------------------------------------------------------------------------------------------------------------------------------------------------------------------------------------------------------------------------------------------------------------------------------------------------------------------------------------------------------------------------------------------------------------------------------------------------------------------------------------------------------------------------------------------------------------------------------------------------------------------------------------------------------------------------------------------------------------------------------------------------------------------------------------------------------------------------------------------------------------------------------------------------------------------------------------------------------------------------------------------------------------------------------------------------------------------------------------------------------------------------------------------------------------------------------------------------------------------------------------------------------------------------------------------------------------------------------------------------------------------------------------------------------------------------------------------------------------------------------------------------------------------------------------------------------------------------------------------------------------------------------------------------------------------------------------------------------------------------------------------------------------------------------------------------------------------------------------------------------------------------------------------------------------------------------------------------------------------------------------------------------------------------------------------------------------------------------------------------------------------------------------------------------------------------------------------------------------------------------------------------------------------------------------------------------------------------------------------------------------------------------------------------------------------------------------------------------------------------------------------------------------------------------------------------------------------------------------------------------------------------------------------------------------------------------------------------------------------------------------------------------------------------------------------------------------------------------------------------------------------------------------------------------------------------------------------------------------------------------------------------------------------------------------------------------------------------------------------------------------------------------------------------------------------------|--------|---------|--------|------------------|----------------|-------------------------------------------------|---------------------------------|----------------------------|-----------------------------|-----------------------|---------|-------------|-------------------|---------------------------------------------------------------------|--------------------|---------|---------|---------|---------|---------|-----------------------|-----------------------|---------|---------|-----------------------|---------|---------|---------|---------|---------|---------|---------|---------|---------|---------|-----------------------|-----------------------|---------|---------|----------|------------------------|------|------|------|-------|-------|-------|------|------|------|------|------|------|------|------|------|------|------|------|------|------|-------|-------|------|------|------|----------------------|------|------|------|-------|-------|-------|-------|-------|-------|-------|-------|-------|-------|-------|-------|-------|-------|-------|-------|-------|--------|-------|-------|-------|-------|-------|------|------|------|------|------|------|------|------|-------|-------|------|------|------|------|------|------|------|-------|------|-------|------|------|------|------|------|----------|----|---|----|----|----|----|----|----|--|--|------|----|-------|----|--------------------|----|----|--|----|--|-------------------|-------------------|----|-----|-----|-----------|-------|-------|-------|-------|-------|-------|------|------|--|--|-------|------|-------|------|------|-------|-----|--|------|--|-----|------|------|------|------|--|--|--|--|------|--|--|--|-----|--|--|--|--|--|--|--------|--|-------|--|--|--|--|--|--|--|--|--|--|--|--|----|--|--|--|--|--|--|--|--|--|--|--|--|-------|--|--|--|--|--|--|--|--|--|--|--|--|-------|--|--|--|--|--|--|--|--|--|--|--|--|-----|--|--|--|--|--|--|--|--|
| 1                                                                                                                                                                                                                                                                                                                                                                                                                                                                                                                                                                                                                                                                                                                                                                                                                                                                                                                                                                                                                                                                                                                                                                                                                                                                                                                                                                                                                                                                                                                                                                                                                                                                                                                                                                                                                                                                                                                                                                                                                                                                                                                                                                                                                                                                                                                                                                                                                                                                                                                                                                                                                                                                                                                                                                                                                                                                                                                                                                                                                                                                                                                                                                                                                                                                                                                                                                                                                                                                            | 21.54  | 91.2    | 12     | 4/25             | K28k           | (R) I V A P G K G I L A A D E S T G S I A K (R) | 1898.0593                       | 114.0544                   | 5.7                         | 39420.2/8.30          | HUMAN   | P04075      | 9442              | Fructose-bisphosphate aldolase A OS=Homo sapiens GN=ALDOA PE=1 SV=2 |                    |         |         |         |         |         |                       |                       |         |         |                       |         |         |         |         |         |         |         |         |         |         |                       |                       |         |         |          |                        |      |      |      |       |       |       |      |      |      |      |      |      |      |      |      |      |      |      |      |      |       |       |      |      |      |                      |      |      |      |       |       |       |       |       |       |       |       |       |       |       |       |       |       |       |       |       |        |       |       |       |       |       |      |      |      |      |      |      |      |      |       |       |      |      |      |      |      |      |      |       |      |       |      |      |      |      |      |          |    |   |    |    |    |    |    |    |  |  |      |    |       |    |                    |    |    |  |    |  |                   |                   |    |     |     |           |       |       |       |       |       |       |      |      |  |  |       |      |       |      |      |       |     |  |      |  |     |      |      |      |      |  |  |  |  |      |  |  |  |     |  |  |  |  |  |  |        |  |       |  |  |  |  |  |  |  |  |  |  |  |  |    |  |  |  |  |  |  |  |  |  |  |  |  |       |  |  |  |  |  |  |  |  |  |  |  |  |       |  |  |  |  |  |  |  |  |  |  |  |  |     |  |  |  |  |  |  |  |  |
| <table border="1"> <thead> <tr> <th>Fragment-ion (m/z)</th> <th>70.064</th> <th>72.079</th> <th>84.079</th> <th>86.096</th> <th>185.163</th> <th>213.158</th> <th>218.156</th> <th>284.195</th> <th>362.218</th> <th>462.743<sup>+2</sup></th> <th>468.252</th> <th>475.283</th> <th>567.317</th> <th>576.346</th> <th>638.364</th> <th>663.360</th> <th>680.411</th> <th>751.433</th> <th>792.426</th> <th>822.486</th> <th>864.965<sup>+2</sup></th> <th>900.477<sup>+2</sup></th> <th>907.450</th> <th>978.467</th> <th>1049.507</th> </tr> </thead> <tbody> <tr> <td>Frac. Inten.(% of TIC)</td> <td>0.00</td> <td>0.05</td> <td>0.08</td> <td>12.50</td> <td>11.18</td> <td>12.62</td> <td>1.89</td> <td>2.19</td> <td>1.56</td> <td>1.82</td> <td>1.77</td> <td>2.71</td> <td>1.77</td> <td>1.95</td> <td>1.89</td> <td>3.20</td> <td>1.97</td> <td>3.07</td> <td>2.19</td> <td>2.40</td> <td>13.30</td> <td>11.11</td> <td>3.51</td> <td>2.30</td> <td>2.99</td> </tr> <tr> <td>Rel. Inten.(% of BP)</td> <td>0.01</td> <td>0.38</td> <td>0.62</td> <td>94.00</td> <td>84.05</td> <td>94.91</td> <td>14.19</td> <td>16.49</td> <td>11.72</td> <td>13.66</td> <td>13.31</td> <td>20.38</td> <td>13.28</td> <td>14.67</td> <td>14.20</td> <td>24.07</td> <td>14.83</td> <td>23.09</td> <td>16.49</td> <td>18.03</td> <td>100.00</td> <td>83.53</td> <td>26.41</td> <td>17.28</td> <td>22.47</td> </tr> <tr> <td>Score</td> <td>0.20</td> <td>0.50</td> <td>0.50</td> <td>0.50</td> <td>0.50</td> <td>0.50</td> <td>1.50</td> <td>0.75</td> <td>-0.12</td> <td>-0.14</td> <td>0.75</td> <td>1.50</td> <td>0.75</td> <td>1.50</td> <td>1.50</td> <td>1.50</td> <td>0.75</td> <td>-0.23</td> <td>1.50</td> <td>-0.18</td> <td>1.50</td> <td>1.50</td> <td>1.50</td> <td>1.50</td> <td>1.50</td> </tr> <tr> <td>Ion-type</td> <td>PR</td> <td>V</td> <td>KQ</td> <td>a1</td> <td>a2</td> <td>b2</td> <td>y2</td> <td>b3</td> <td></td> <td></td> <td>APGk</td> <td>ys</td> <td>PGkGI</td> <td>ys</td> <td>y<sup>+++13</sup></td> <td>y7</td> <td>b6</td> <td></td> <td>ys</td> <td></td> <td>y17<sup>+2</sup></td> <td>y18<sup>+2</sup></td> <td>y9</td> <td>y10</td> <td>y11</td> </tr> <tr> <td>Delta ppm</td> <td>-14.6</td> <td>-30.2</td> <td>-17.5</td> <td>-23.5</td> <td>-13.7</td> <td>-14.3</td> <td>27.9</td> <td>-9.0</td> <td></td> <td></td> <td>-12.8</td> <td>-9.6</td> <td>-15.7</td> <td>19.3</td> <td>31.8</td> <td>-10.2</td> <td>1.3</td> <td></td> <td>20.4</td> <td></td> <td>5.9</td> <td>-1.1</td> <td>14.7</td> <td>-6.6</td> <td>-3.7</td> </tr> <tr> <td></td> <td></td> <td></td> <td></td> <td>0.50</td> <td></td> <td></td> <td></td> <td>GIL</td> <td></td> <td></td> <td></td> <td></td> <td></td> <td></td> <td>APGKGI</td> <td></td> <td>PGKGI</td> <td></td> <td></td> <td></td> <td></td> <td></td> <td></td> <td></td> <td></td> </tr> <tr> <td></td> <td></td> <td></td> <td></td> <td>LI</td> <td></td> <td>PGKGI</td> <td></td> <td></td> <td></td> <td></td> <td></td> <td></td> <td></td> <td></td> </tr> <tr> <td></td> <td></td> <td></td> <td></td> <td>-10.8</td> <td></td> <td>0.6</td> <td></td> <td></td> <td></td> <td></td> <td></td> <td></td> <td></td> <td></td> </tr> </tbody> </table> |        |         |        |                  |                |                                                 |                                 |                            |                             |                       |         |             |                   |                                                                     | Fragment-ion (m/z) | 70.064  | 72.079  | 84.079  | 86.096  | 185.163 | 213.158               | 218.156               | 284.195 | 362.218 | 462.743 <sup>+2</sup> | 468.252 | 475.283 | 567.317 | 576.346 | 638.364 | 663.360 | 680.411 | 751.433 | 792.426 | 822.486 | 864.965 <sup>+2</sup> | 900.477 <sup>+2</sup> | 907.450 | 978.467 | 1049.507 | Frac. Inten.(% of TIC) | 0.00 | 0.05 | 0.08 | 12.50 | 11.18 | 12.62 | 1.89 | 2.19 | 1.56 | 1.82 | 1.77 | 2.71 | 1.77 | 1.95 | 1.89 | 3.20 | 1.97 | 3.07 | 2.19 | 2.40 | 13.30 | 11.11 | 3.51 | 2.30 | 2.99 | Rel. Inten.(% of BP) | 0.01 | 0.38 | 0.62 | 94.00 | 84.05 | 94.91 | 14.19 | 16.49 | 11.72 | 13.66 | 13.31 | 20.38 | 13.28 | 14.67 | 14.20 | 24.07 | 14.83 | 23.09 | 16.49 | 18.03 | 100.00 | 83.53 | 26.41 | 17.28 | 22.47 | Score | 0.20 | 0.50 | 0.50 | 0.50 | 0.50 | 0.50 | 1.50 | 0.75 | -0.12 | -0.14 | 0.75 | 1.50 | 0.75 | 1.50 | 1.50 | 1.50 | 0.75 | -0.23 | 1.50 | -0.18 | 1.50 | 1.50 | 1.50 | 1.50 | 1.50 | Ion-type | PR | V | KQ | a1 | a2 | b2 | y2 | b3 |  |  | APGk | ys | PGkGI | ys | y <sup>+++13</sup> | y7 | b6 |  | ys |  | y17 <sup>+2</sup> | y18 <sup>+2</sup> | y9 | y10 | y11 | Delta ppm | -14.6 | -30.2 | -17.5 | -23.5 | -13.7 | -14.3 | 27.9 | -9.0 |  |  | -12.8 | -9.6 | -15.7 | 19.3 | 31.8 | -10.2 | 1.3 |  | 20.4 |  | 5.9 | -1.1 | 14.7 | -6.6 | -3.7 |  |  |  |  | 0.50 |  |  |  | GIL |  |  |  |  |  |  | APGKGI |  | PGKGI |  |  |  |  |  |  |  |  |  |  |  |  | LI |  |  |  |  |  |  |  |  |  |  |  |  | PGKGI |  |  |  |  |  |  |  |  |  |  |  |  | -10.8 |  |  |  |  |  |  |  |  |  |  |  |  | 0.6 |  |  |  |  |  |  |  |  |
| Fragment-ion (m/z)                                                                                                                                                                                                                                                                                                                                                                                                                                                                                                                                                                                                                                                                                                                                                                                                                                                                                                                                                                                                                                                                                                                                                                                                                                                                                                                                                                                                                                                                                                                                                                                                                                                                                                                                                                                                                                                                                                                                                                                                                                                                                                                                                                                                                                                                                                                                                                                                                                                                                                                                                                                                                                                                                                                                                                                                                                                                                                                                                                                                                                                                                                                                                                                                                                                                                                                                                                                                                                                           | 70.064 | 72.079  | 84.079 | 86.096           | 185.163        | 213.158                                         | 218.156                         | 284.195                    | 362.218                     | 462.743 <sup>+2</sup> | 468.252 | 475.283     | 567.317           | 576.346                                                             | 638.364            | 663.360 | 680.411 | 751.433 | 792.426 | 822.486 | 864.965 <sup>+2</sup> | 900.477 <sup>+2</sup> | 907.450 | 978.467 | 1049.507              |         |         |         |         |         |         |         |         |         |         |                       |                       |         |         |          |                        |      |      |      |       |       |       |      |      |      |      |      |      |      |      |      |      |      |      |      |      |       |       |      |      |      |                      |      |      |      |       |       |       |       |       |       |       |       |       |       |       |       |       |       |       |       |       |        |       |       |       |       |       |      |      |      |      |      |      |      |      |       |       |      |      |      |      |      |      |      |       |      |       |      |      |      |      |      |          |    |   |    |    |    |    |    |    |  |  |      |    |       |    |                    |    |    |  |    |  |                   |                   |    |     |     |           |       |       |       |       |       |       |      |      |  |  |       |      |       |      |      |       |     |  |      |  |     |      |      |      |      |  |  |  |  |      |  |  |  |     |  |  |  |  |  |  |        |  |       |  |  |  |  |  |  |  |  |  |  |  |  |    |  |  |  |  |  |  |  |  |  |  |  |  |       |  |  |  |  |  |  |  |  |  |  |  |  |       |  |  |  |  |  |  |  |  |  |  |  |  |     |  |  |  |  |  |  |  |  |
| Frac. Inten.(% of TIC)                                                                                                                                                                                                                                                                                                                                                                                                                                                                                                                                                                                                                                                                                                                                                                                                                                                                                                                                                                                                                                                                                                                                                                                                                                                                                                                                                                                                                                                                                                                                                                                                                                                                                                                                                                                                                                                                                                                                                                                                                                                                                                                                                                                                                                                                                                                                                                                                                                                                                                                                                                                                                                                                                                                                                                                                                                                                                                                                                                                                                                                                                                                                                                                                                                                                                                                                                                                                                                                       | 0.00   | 0.05    | 0.08   | 12.50            | 11.18          | 12.62                                           | 1.89                            | 2.19                       | 1.56                        | 1.82                  | 1.77    | 2.71        | 1.77              | 1.95                                                                | 1.89               | 3.20    | 1.97    | 3.07    | 2.19    | 2.40    | 13.30                 | 11.11                 | 3.51    | 2.30    | 2.99                  |         |         |         |         |         |         |         |         |         |         |                       |                       |         |         |          |                        |      |      |      |       |       |       |      |      |      |      |      |      |      |      |      |      |      |      |      |      |       |       |      |      |      |                      |      |      |      |       |       |       |       |       |       |       |       |       |       |       |       |       |       |       |       |       |        |       |       |       |       |       |      |      |      |      |      |      |      |      |       |       |      |      |      |      |      |      |      |       |      |       |      |      |      |      |      |          |    |   |    |    |    |    |    |    |  |  |      |    |       |    |                    |    |    |  |    |  |                   |                   |    |     |     |           |       |       |       |       |       |       |      |      |  |  |       |      |       |      |      |       |     |  |      |  |     |      |      |      |      |  |  |  |  |      |  |  |  |     |  |  |  |  |  |  |        |  |       |  |  |  |  |  |  |  |  |  |  |  |  |    |  |  |  |  |  |  |  |  |  |  |  |  |       |  |  |  |  |  |  |  |  |  |  |  |  |       |  |  |  |  |  |  |  |  |  |  |  |  |     |  |  |  |  |  |  |  |  |
| Rel. Inten.(% of BP)                                                                                                                                                                                                                                                                                                                                                                                                                                                                                                                                                                                                                                                                                                                                                                                                                                                                                                                                                                                                                                                                                                                                                                                                                                                                                                                                                                                                                                                                                                                                                                                                                                                                                                                                                                                                                                                                                                                                                                                                                                                                                                                                                                                                                                                                                                                                                                                                                                                                                                                                                                                                                                                                                                                                                                                                                                                                                                                                                                                                                                                                                                                                                                                                                                                                                                                                                                                                                                                         | 0.01   | 0.38    | 0.62   | 94.00            | 84.05          | 94.91                                           | 14.19                           | 16.49                      | 11.72                       | 13.66                 | 13.31   | 20.38       | 13.28             | 14.67                                                               | 14.20              | 24.07   | 14.83   | 23.09   | 16.49   | 18.03   | 100.00                | 83.53                 | 26.41   | 17.28   | 22.47                 |         |         |         |         |         |         |         |         |         |         |                       |                       |         |         |          |                        |      |      |      |       |       |       |      |      |      |      |      |      |      |      |      |      |      |      |      |      |       |       |      |      |      |                      |      |      |      |       |       |       |       |       |       |       |       |       |       |       |       |       |       |       |       |       |        |       |       |       |       |       |      |      |      |      |      |      |      |      |       |       |      |      |      |      |      |      |      |       |      |       |      |      |      |      |      |          |    |   |    |    |    |    |    |    |  |  |      |    |       |    |                    |    |    |  |    |  |                   |                   |    |     |     |           |       |       |       |       |       |       |      |      |  |  |       |      |       |      |      |       |     |  |      |  |     |      |      |      |      |  |  |  |  |      |  |  |  |     |  |  |  |  |  |  |        |  |       |  |  |  |  |  |  |  |  |  |  |  |  |    |  |  |  |  |  |  |  |  |  |  |  |  |       |  |  |  |  |  |  |  |  |  |  |  |  |       |  |  |  |  |  |  |  |  |  |  |  |  |     |  |  |  |  |  |  |  |  |
| Score                                                                                                                                                                                                                                                                                                                                                                                                                                                                                                                                                                                                                                                                                                                                                                                                                                                                                                                                                                                                                                                                                                                                                                                                                                                                                                                                                                                                                                                                                                                                                                                                                                                                                                                                                                                                                                                                                                                                                                                                                                                                                                                                                                                                                                                                                                                                                                                                                                                                                                                                                                                                                                                                                                                                                                                                                                                                                                                                                                                                                                                                                                                                                                                                                                                                                                                                                                                                                                                                        | 0.20   | 0.50    | 0.50   | 0.50             | 0.50           | 0.50                                            | 1.50                            | 0.75                       | -0.12                       | -0.14                 | 0.75    | 1.50        | 0.75              | 1.50                                                                | 1.50               | 1.50    | 0.75    | -0.23   | 1.50    | -0.18   | 1.50                  | 1.50                  | 1.50    | 1.50    | 1.50                  |         |         |         |         |         |         |         |         |         |         |                       |                       |         |         |          |                        |      |      |      |       |       |       |      |      |      |      |      |      |      |      |      |      |      |      |      |      |       |       |      |      |      |                      |      |      |      |       |       |       |       |       |       |       |       |       |       |       |       |       |       |       |       |       |        |       |       |       |       |       |      |      |      |      |      |      |      |      |       |       |      |      |      |      |      |      |      |       |      |       |      |      |      |      |      |          |    |   |    |    |    |    |    |    |  |  |      |    |       |    |                    |    |    |  |    |  |                   |                   |    |     |     |           |       |       |       |       |       |       |      |      |  |  |       |      |       |      |      |       |     |  |      |  |     |      |      |      |      |  |  |  |  |      |  |  |  |     |  |  |  |  |  |  |        |  |       |  |  |  |  |  |  |  |  |  |  |  |  |    |  |  |  |  |  |  |  |  |  |  |  |  |       |  |  |  |  |  |  |  |  |  |  |  |  |       |  |  |  |  |  |  |  |  |  |  |  |  |     |  |  |  |  |  |  |  |  |
| Ion-type                                                                                                                                                                                                                                                                                                                                                                                                                                                                                                                                                                                                                                                                                                                                                                                                                                                                                                                                                                                                                                                                                                                                                                                                                                                                                                                                                                                                                                                                                                                                                                                                                                                                                                                                                                                                                                                                                                                                                                                                                                                                                                                                                                                                                                                                                                                                                                                                                                                                                                                                                                                                                                                                                                                                                                                                                                                                                                                                                                                                                                                                                                                                                                                                                                                                                                                                                                                                                                                                     | PR     | V       | KQ     | a1               | a2             | b2                                              | y2                              | b3                         |                             |                       | APGk    | ys          | PGkGI             | ys                                                                  | y <sup>+++13</sup> | y7      | b6      |         | ys      |         | y17 <sup>+2</sup>     | y18 <sup>+2</sup>     | y9      | y10     | y11                   |         |         |         |         |         |         |         |         |         |         |                       |                       |         |         |          |                        |      |      |      |       |       |       |      |      |      |      |      |      |      |      |      |      |      |      |      |      |       |       |      |      |      |                      |      |      |      |       |       |       |       |       |       |       |       |       |       |       |       |       |       |       |       |       |        |       |       |       |       |       |      |      |      |      |      |      |      |      |       |       |      |      |      |      |      |      |      |       |      |       |      |      |      |      |      |          |    |   |    |    |    |    |    |    |  |  |      |    |       |    |                    |    |    |  |    |  |                   |                   |    |     |     |           |       |       |       |       |       |       |      |      |  |  |       |      |       |      |      |       |     |  |      |  |     |      |      |      |      |  |  |  |  |      |  |  |  |     |  |  |  |  |  |  |        |  |       |  |  |  |  |  |  |  |  |  |  |  |  |    |  |  |  |  |  |  |  |  |  |  |  |  |       |  |  |  |  |  |  |  |  |  |  |  |  |       |  |  |  |  |  |  |  |  |  |  |  |  |     |  |  |  |  |  |  |  |  |
| Delta ppm                                                                                                                                                                                                                                                                                                                                                                                                                                                                                                                                                                                                                                                                                                                                                                                                                                                                                                                                                                                                                                                                                                                                                                                                                                                                                                                                                                                                                                                                                                                                                                                                                                                                                                                                                                                                                                                                                                                                                                                                                                                                                                                                                                                                                                                                                                                                                                                                                                                                                                                                                                                                                                                                                                                                                                                                                                                                                                                                                                                                                                                                                                                                                                                                                                                                                                                                                                                                                                                                    | -14.6  | -30.2   | -17.5  | -23.5            | -13.7          | -14.3                                           | 27.9                            | -9.0                       |                             |                       | -12.8   | -9.6        | -15.7             | 19.3                                                                | 31.8               | -10.2   | 1.3     |         | 20.4    |         | 5.9                   | -1.1                  | 14.7    | -6.6    | -3.7                  |         |         |         |         |         |         |         |         |         |         |                       |                       |         |         |          |                        |      |      |      |       |       |       |      |      |      |      |      |      |      |      |      |      |      |      |      |      |       |       |      |      |      |                      |      |      |      |       |       |       |       |       |       |       |       |       |       |       |       |       |       |       |       |       |        |       |       |       |       |       |      |      |      |      |      |      |      |      |       |       |      |      |      |      |      |      |      |       |      |       |      |      |      |      |      |          |    |   |    |    |    |    |    |    |  |  |      |    |       |    |                    |    |    |  |    |  |                   |                   |    |     |     |           |       |       |       |       |       |       |      |      |  |  |       |      |       |      |      |       |     |  |      |  |     |      |      |      |      |  |  |  |  |      |  |  |  |     |  |  |  |  |  |  |        |  |       |  |  |  |  |  |  |  |  |  |  |  |  |    |  |  |  |  |  |  |  |  |  |  |  |  |       |  |  |  |  |  |  |  |  |  |  |  |  |       |  |  |  |  |  |  |  |  |  |  |  |  |     |  |  |  |  |  |  |  |  |
|                                                                                                                                                                                                                                                                                                                                                                                                                                                                                                                                                                                                                                                                                                                                                                                                                                                                                                                                                                                                                                                                                                                                                                                                                                                                                                                                                                                                                                                                                                                                                                                                                                                                                                                                                                                                                                                                                                                                                                                                                                                                                                                                                                                                                                                                                                                                                                                                                                                                                                                                                                                                                                                                                                                                                                                                                                                                                                                                                                                                                                                                                                                                                                                                                                                                                                                                                                                                                                                                              |        |         |        | 0.50             |                |                                                 |                                 | GIL                        |                             |                       |         |             |                   |                                                                     | APGKGI             |         | PGKGI   |         |         |         |                       |                       |         |         |                       |         |         |         |         |         |         |         |         |         |         |                       |                       |         |         |          |                        |      |      |      |       |       |       |      |      |      |      |      |      |      |      |      |      |      |      |      |      |       |       |      |      |      |                      |      |      |      |       |       |       |       |       |       |       |       |       |       |       |       |       |       |       |       |       |        |       |       |       |       |       |      |      |      |      |      |      |      |      |       |       |      |      |      |      |      |      |      |       |      |       |      |      |      |      |      |          |    |   |    |    |    |    |    |    |  |  |      |    |       |    |                    |    |    |  |    |  |                   |                   |    |     |     |           |       |       |       |       |       |       |      |      |  |  |       |      |       |      |      |       |     |  |      |  |     |      |      |      |      |  |  |  |  |      |  |  |  |     |  |  |  |  |  |  |        |  |       |  |  |  |  |  |  |  |  |  |  |  |  |    |  |  |  |  |  |  |  |  |  |  |  |  |       |  |  |  |  |  |  |  |  |  |  |  |  |       |  |  |  |  |  |  |  |  |  |  |  |  |     |  |  |  |  |  |  |  |  |
|                                                                                                                                                                                                                                                                                                                                                                                                                                                                                                                                                                                                                                                                                                                                                                                                                                                                                                                                                                                                                                                                                                                                                                                                                                                                                                                                                                                                                                                                                                                                                                                                                                                                                                                                                                                                                                                                                                                                                                                                                                                                                                                                                                                                                                                                                                                                                                                                                                                                                                                                                                                                                                                                                                                                                                                                                                                                                                                                                                                                                                                                                                                                                                                                                                                                                                                                                                                                                                                                              |        |         |        | LI               |                |                                                 |                                 |                            |                             |                       |         |             |                   |                                                                     |                    |         | PGKGI   |         |         |         |                       |                       |         |         |                       |         |         |         |         |         |         |         |         |         |         |                       |                       |         |         |          |                        |      |      |      |       |       |       |      |      |      |      |      |      |      |      |      |      |      |      |      |      |       |       |      |      |      |                      |      |      |      |       |       |       |       |       |       |       |       |       |       |       |       |       |       |       |       |       |        |       |       |       |       |       |      |      |      |      |      |      |      |      |       |       |      |      |      |      |      |      |      |       |      |       |      |      |      |      |      |          |    |   |    |    |    |    |    |    |  |  |      |    |       |    |                    |    |    |  |    |  |                   |                   |    |     |     |           |       |       |       |       |       |       |      |      |  |  |       |      |       |      |      |       |     |  |      |  |     |      |      |      |      |  |  |  |  |      |  |  |  |     |  |  |  |  |  |  |        |  |       |  |  |  |  |  |  |  |  |  |  |  |  |    |  |  |  |  |  |  |  |  |  |  |  |  |       |  |  |  |  |  |  |  |  |  |  |  |  |       |  |  |  |  |  |  |  |  |  |  |  |  |     |  |  |  |  |  |  |  |  |
|                                                                                                                                                                                                                                                                                                                                                                                                                                                                                                                                                                                                                                                                                                                                                                                                                                                                                                                                                                                                                                                                                                                                                                                                                                                                                                                                                                                                                                                                                                                                                                                                                                                                                                                                                                                                                                                                                                                                                                                                                                                                                                                                                                                                                                                                                                                                                                                                                                                                                                                                                                                                                                                                                                                                                                                                                                                                                                                                                                                                                                                                                                                                                                                                                                                                                                                                                                                                                                                                              |        |         |        | -10.8            |                |                                                 |                                 |                            |                             |                       |         |             |                   |                                                                     |                    |         | 0.6     |         |         |         |                       |                       |         |         |                       |         |         |         |         |         |         |         |         |         |         |                       |                       |         |         |          |                        |      |      |      |       |       |       |      |      |      |      |      |      |      |      |      |      |      |      |      |      |       |       |      |      |      |                      |      |      |      |       |       |       |       |       |       |       |       |       |       |       |       |       |       |       |       |       |        |       |       |       |       |       |      |      |      |      |      |      |      |      |       |       |      |      |      |      |      |      |      |       |      |       |      |      |      |      |      |          |    |   |    |    |    |    |    |    |  |  |      |    |       |    |                    |    |    |  |    |  |                   |                   |    |     |     |           |       |       |       |       |       |       |      |      |  |  |       |      |       |      |      |       |     |  |      |  |     |      |      |      |      |  |  |  |  |      |  |  |  |     |  |  |  |  |  |  |        |  |       |  |  |  |  |  |  |  |  |  |  |  |  |    |  |  |  |  |  |  |  |  |  |  |  |  |       |  |  |  |  |  |  |  |  |  |  |  |  |       |  |  |  |  |  |  |  |  |  |  |  |  |     |  |  |  |  |  |  |  |  |

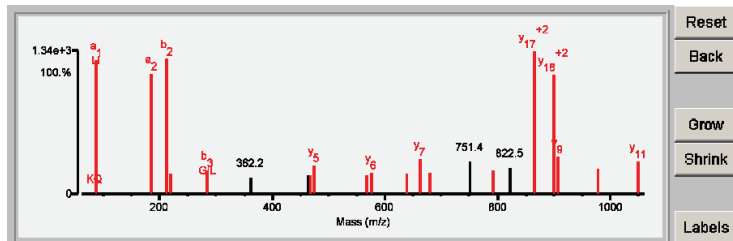

Result Summary

| Rank | Score | SPI (%) | BCS | # Unmatched Ions | Variable sites | Sequence                | MH <sup>+</sup> Calculated (Da) | MH <sup>+</sup> Error (Da) | MH <sup>+</sup> Error (ppm) | Protein MW/PI (Da) | Species | Accession # | Protein Name                                                                                               |
|------|-------|---------|-----|------------------|----------------|-------------------------|---------------------------------|----------------------------|-----------------------------|--------------------|---------|-------------|------------------------------------------------------------------------------------------------------------|
| 1    | 13.70 | 72.6    | 8   | 10/25            | K42k           | (K)GILAADESTGSIaK(R)(L) | 1488.8016                       | 114.0539                   | 6.8                         | 39420.2/8.30       | HUMAN   | P04075      | Fructose-bisphosphate aldolase A OS=Homo sapiens GN=ALDOA PE=1 SV=2                                        |
| 2    | 5.75  | 59.6    | 3   | 16/25            | None           | (K)GVSEAAEFALLNR(K)     | 1602.8850                       | -0.0294                    | -18.4                       | 118585.6/6.29      | HUMAN   | RQ5M775     | REVERSE Sperm antigen with calponin homology and coiled-coil domains 1 OS=Homo sapiens GN=SPECC1 PE=1 SV=1 |
| 3    | 4.48  | 51.9    | 1   | 14/25            | M180m          | (R)EGPTmQLAVAVLSPR(V)   | 1586.8723                       | 15.9832                    | -7.3                        | 77188.4/6.18       | HUMAN   | RO15228     | REVERSE Dihydroxyacetone phosphate acyltransferase OS=Homo sapiens GN=GNPAT PE=1 SV=1                      |
| 4    | 3.79  | 53.2    | 2   | 15/25            | K74k           | (K)MVKPVASQFVNR(I)      | 1488.8355                       | 114.0200                   | -14.3                       | 70384.6/5.18       | HUMAN   | RQ9UJY5     | REVERSE ADP-ribosylation factor-binding protein GGA1 OS=Homo sapiens GN=GGA1 PE=1 SV=1                     |

Detailed Results

| Rank                                                                                                                                                                                                                                                                                                                                                                                                                                                                                                                                                                                                                                                                                                                                                                                                                                                                                                                                                                                                                                                                                                                                                                                                                                                                                                                                                                                                                                                                                                                                                                                                                                                                                                                                                                                                                                                                                                                                                          | Score  | SPI (%) | BCS    | # Unmatched Ions | Variable sites | Sequence                                 | MH <sup>+</sup> Calculated (Da) | MH <sup>+</sup> Error (Da) | MH <sup>+</sup> Error (ppm) | Protein MW/PI (Da) | Species | Accession # | MS-Digest Index # | Protein Name                                                        |         |                    |           |         |         |           |         |           |         |         |         |         |         |         |         |           |         |         |           |         |         |           |         |           |         |         |         |                         |      |      |      |      |      |       |      |      |      |      |      |      |      |      |      |      |      |      |      |      |      |      |      |      |      |                             |       |      |       |      |       |        |       |       |       |       |       |       |       |       |       |       |       |       |       |       |       |       |       |       |       |          |  |  |    |     |    |       |    |    |    |    |  |  |  |  |    |  |  |  |    |       |  |  |    |    |    |           |  |  |      |       |  |       |       |       |      |       |       |  |  |  |      |  |  |  |     |       |  |      |      |     |     |
|---------------------------------------------------------------------------------------------------------------------------------------------------------------------------------------------------------------------------------------------------------------------------------------------------------------------------------------------------------------------------------------------------------------------------------------------------------------------------------------------------------------------------------------------------------------------------------------------------------------------------------------------------------------------------------------------------------------------------------------------------------------------------------------------------------------------------------------------------------------------------------------------------------------------------------------------------------------------------------------------------------------------------------------------------------------------------------------------------------------------------------------------------------------------------------------------------------------------------------------------------------------------------------------------------------------------------------------------------------------------------------------------------------------------------------------------------------------------------------------------------------------------------------------------------------------------------------------------------------------------------------------------------------------------------------------------------------------------------------------------------------------------------------------------------------------------------------------------------------------------------------------------------------------------------------------------------------------|--------|---------|--------|------------------|----------------|------------------------------------------|---------------------------------|----------------------------|-----------------------------|--------------------|---------|-------------|-------------------|---------------------------------------------------------------------|---------|--------------------|-----------|---------|---------|-----------|---------|-----------|---------|---------|---------|---------|---------|---------|---------|-----------|---------|---------|-----------|---------|---------|-----------|---------|-----------|---------|---------|---------|-------------------------|------|------|------|------|------|-------|------|------|------|------|------|------|------|------|------|------|------|------|------|------|------|------|------|------|------|-----------------------------|-------|------|-------|------|-------|--------|-------|-------|-------|-------|-------|-------|-------|-------|-------|-------|-------|-------|-------|-------|-------|-------|-------|-------|-------|----------|--|--|----|-----|----|-------|----|----|----|----|--|--|--|--|----|--|--|--|----|-------|--|--|----|----|----|-----------|--|--|------|-------|--|-------|-------|-------|------|-------|-------|--|--|--|------|--|--|--|-----|-------|--|------|------|-----|-----|
| 1                                                                                                                                                                                                                                                                                                                                                                                                                                                                                                                                                                                                                                                                                                                                                                                                                                                                                                                                                                                                                                                                                                                                                                                                                                                                                                                                                                                                                                                                                                                                                                                                                                                                                                                                                                                                                                                                                                                                                             | 13.70  | 72.6    | 8      | 10/25            | K42k           | (K)G I L I A A D E S T G S I a K (R) (L) | 1488.8016                       | 114.0539                   | 6.8                         | 39420.2/8.30       | HUMAN   | P04075      | 18883             | Fructose-bisphosphate aldolase A OS=Homo sapiens GN=ALDOA PE=1 SV=2 |         |                    |           |         |         |           |         |           |         |         |         |         |         |         |         |           |         |         |           |         |         |           |         |           |         |         |         |                         |      |      |      |      |      |       |      |      |      |      |      |      |      |      |      |      |      |      |      |      |      |      |      |      |      |                             |       |      |       |      |       |        |       |       |       |       |       |       |       |       |       |       |       |       |       |       |       |       |       |       |       |          |  |  |    |     |    |       |    |    |    |    |  |  |  |  |    |  |  |  |    |       |  |  |    |    |    |           |  |  |      |       |  |       |       |       |      |       |       |  |  |  |      |  |  |  |     |       |  |      |      |     |     |
| <table border="1"> <thead> <tr> <th>Fragment-Ion (m/z)</th> <th>84.079</th><th>86.096</th><th>87.098</th><th>129.101</th><th>136.072</th><th>143.116</th><th>157.132</th><th>171.112</th><th>175.118</th><th>185.127</th><th>284.192</th><th>313.204</th><th>381.155</th><th>387.143*2</th><th>478.245</th><th>488.291</th><th>498.320*2</th><th>625.304</th><th>660.337</th><th>661.296*2</th><th>688.392</th><th>716.886*2</th><th>745.440</th><th>846.479</th><th>933.513</th> </tr> </thead> <tbody> <tr> <td>Frac. Inten. (% of TIC)</td> <td>5.47</td><td>0.93</td><td>2.22</td><td>0.06</td><td>2.19</td><td>18.66</td><td>4.14</td><td>6.31</td><td>3.83</td><td>5.14</td><td>2.59</td><td>3.12</td><td>2.35</td><td>2.22</td><td>2.39</td><td>6.35</td><td>2.54</td><td>2.48</td><td>3.44</td><td>2.46</td><td>3.04</td><td>2.33</td><td>6.23</td><td>5.61</td><td>4.10</td> </tr> <tr> <td>Rel. Inten. (% of BP) Score</td> <td>29.34</td><td>4.96</td><td>11.92</td><td>0.34</td><td>11.72</td><td>100.00</td><td>22.21</td><td>33.81</td><td>19.45</td><td>27.53</td><td>13.88</td><td>16.72</td><td>12.59</td><td>11.90</td><td>12.81</td><td>34.02</td><td>13.64</td><td>13.30</td><td>18.41</td><td>13.18</td><td>16.31</td><td>12.47</td><td>33.39</td><td>30.09</td><td>21.98</td> </tr> <tr> <td>ion-type</td> <td></td><td></td><td>LI</td><td>RKQ</td><td>a2</td><td>IA-28</td><td>b2</td><td>y1</td><td>IA</td><td>b3</td><td></td><td></td><td></td><td></td><td>y3</td><td></td><td></td><td></td><td>y5</td><td>y++12</td><td></td><td></td><td>y6</td><td>y7</td><td>y8</td> </tr> <tr> <td>Delta ppm</td> <td></td><td></td><td>-4.9</td><td>-13.5</td><td></td><td>-20.2</td><td>-17.4</td><td>-14.0</td><td>-4.3</td><td>-12.2</td><td>-21.3</td><td></td><td></td><td></td><td>-6.1</td><td></td><td></td><td></td><td>8.3</td><td>-25.9</td><td></td><td>18.2</td><td>11.1</td><td>0.1</td><td>1.9</td> </tr> </tbody> </table> |        |         |        |                  |                |                                          |                                 |                            |                             |                    |         |             |                   |                                                                     |         | Fragment-Ion (m/z) | 84.079    | 86.096  | 87.098  | 129.101   | 136.072 | 143.116   | 157.132 | 171.112 | 175.118 | 185.127 | 284.192 | 313.204 | 381.155 | 387.143*2 | 478.245 | 488.291 | 498.320*2 | 625.304 | 660.337 | 661.296*2 | 688.392 | 716.886*2 | 745.440 | 846.479 | 933.513 | Frac. Inten. (% of TIC) | 5.47 | 0.93 | 2.22 | 0.06 | 2.19 | 18.66 | 4.14 | 6.31 | 3.83 | 5.14 | 2.59 | 3.12 | 2.35 | 2.22 | 2.39 | 6.35 | 2.54 | 2.48 | 3.44 | 2.46 | 3.04 | 2.33 | 6.23 | 5.61 | 4.10 | Rel. Inten. (% of BP) Score | 29.34 | 4.96 | 11.92 | 0.34 | 11.72 | 100.00 | 22.21 | 33.81 | 19.45 | 27.53 | 13.88 | 16.72 | 12.59 | 11.90 | 12.81 | 34.02 | 13.64 | 13.30 | 18.41 | 13.18 | 16.31 | 12.47 | 33.39 | 30.09 | 21.98 | ion-type |  |  | LI | RKQ | a2 | IA-28 | b2 | y1 | IA | b3 |  |  |  |  | y3 |  |  |  | y5 | y++12 |  |  | y6 | y7 | y8 | Delta ppm |  |  | -4.9 | -13.5 |  | -20.2 | -17.4 | -14.0 | -4.3 | -12.2 | -21.3 |  |  |  | -6.1 |  |  |  | 8.3 | -25.9 |  | 18.2 | 11.1 | 0.1 | 1.9 |
| Fragment-Ion (m/z)                                                                                                                                                                                                                                                                                                                                                                                                                                                                                                                                                                                                                                                                                                                                                                                                                                                                                                                                                                                                                                                                                                                                                                                                                                                                                                                                                                                                                                                                                                                                                                                                                                                                                                                                                                                                                                                                                                                                            | 84.079 | 86.096  | 87.098 | 129.101          | 136.072        | 143.116                                  | 157.132                         | 171.112                    | 175.118                     | 185.127            | 284.192 | 313.204     | 381.155           | 387.143*2                                                           | 478.245 | 488.291            | 498.320*2 | 625.304 | 660.337 | 661.296*2 | 688.392 | 716.886*2 | 745.440 | 846.479 | 933.513 |         |         |         |         |           |         |         |           |         |         |           |         |           |         |         |         |                         |      |      |      |      |      |       |      |      |      |      |      |      |      |      |      |      |      |      |      |      |      |      |      |      |      |                             |       |      |       |      |       |        |       |       |       |       |       |       |       |       |       |       |       |       |       |       |       |       |       |       |       |          |  |  |    |     |    |       |    |    |    |    |  |  |  |  |    |  |  |  |    |       |  |  |    |    |    |           |  |  |      |       |  |       |       |       |      |       |       |  |  |  |      |  |  |  |     |       |  |      |      |     |     |
| Frac. Inten. (% of TIC)                                                                                                                                                                                                                                                                                                                                                                                                                                                                                                                                                                                                                                                                                                                                                                                                                                                                                                                                                                                                                                                                                                                                                                                                                                                                                                                                                                                                                                                                                                                                                                                                                                                                                                                                                                                                                                                                                                                                       | 5.47   | 0.93    | 2.22   | 0.06             | 2.19           | 18.66                                    | 4.14                            | 6.31                       | 3.83                        | 5.14               | 2.59    | 3.12        | 2.35              | 2.22                                                                | 2.39    | 6.35               | 2.54      | 2.48    | 3.44    | 2.46      | 3.04    | 2.33      | 6.23    | 5.61    | 4.10    |         |         |         |         |           |         |         |           |         |         |           |         |           |         |         |         |                         |      |      |      |      |      |       |      |      |      |      |      |      |      |      |      |      |      |      |      |      |      |      |      |      |      |                             |       |      |       |      |       |        |       |       |       |       |       |       |       |       |       |       |       |       |       |       |       |       |       |       |       |          |  |  |    |     |    |       |    |    |    |    |  |  |  |  |    |  |  |  |    |       |  |  |    |    |    |           |  |  |      |       |  |       |       |       |      |       |       |  |  |  |      |  |  |  |     |       |  |      |      |     |     |
| Rel. Inten. (% of BP) Score                                                                                                                                                                                                                                                                                                                                                                                                                                                                                                                                                                                                                                                                                                                                                                                                                                                                                                                                                                                                                                                                                                                                                                                                                                                                                                                                                                                                                                                                                                                                                                                                                                                                                                                                                                                                                                                                                                                                   | 29.34  | 4.96    | 11.92  | 0.34             | 11.72          | 100.00                                   | 22.21                           | 33.81                      | 19.45                       | 27.53              | 13.88   | 16.72       | 12.59             | 11.90                                                               | 12.81   | 34.02              | 13.64     | 13.30   | 18.41   | 13.18     | 16.31   | 12.47     | 33.39   | 30.09   | 21.98   |         |         |         |         |           |         |         |           |         |         |           |         |           |         |         |         |                         |      |      |      |      |      |       |      |      |      |      |      |      |      |      |      |      |      |      |      |      |      |      |      |      |      |                             |       |      |       |      |       |        |       |       |       |       |       |       |       |       |       |       |       |       |       |       |       |       |       |       |       |          |  |  |    |     |    |       |    |    |    |    |  |  |  |  |    |  |  |  |    |       |  |  |    |    |    |           |  |  |      |       |  |       |       |       |      |       |       |  |  |  |      |  |  |  |     |       |  |      |      |     |     |
| ion-type                                                                                                                                                                                                                                                                                                                                                                                                                                                                                                                                                                                                                                                                                                                                                                                                                                                                                                                                                                                                                                                                                                                                                                                                                                                                                                                                                                                                                                                                                                                                                                                                                                                                                                                                                                                                                                                                                                                                                      |        |         | LI     | RKQ              | a2             | IA-28                                    | b2                              | y1                         | IA                          | b3                 |         |             |                   |                                                                     | y3      |                    |           |         | y5      | y++12     |         |           | y6      | y7      | y8      |         |         |         |         |           |         |         |           |         |         |           |         |           |         |         |         |                         |      |      |      |      |      |       |      |      |      |      |      |      |      |      |      |      |      |      |      |      |      |      |      |      |      |                             |       |      |       |      |       |        |       |       |       |       |       |       |       |       |       |       |       |       |       |       |       |       |       |       |       |          |  |  |    |     |    |       |    |    |    |    |  |  |  |  |    |  |  |  |    |       |  |  |    |    |    |           |  |  |      |       |  |       |       |       |      |       |       |  |  |  |      |  |  |  |     |       |  |      |      |     |     |
| Delta ppm                                                                                                                                                                                                                                                                                                                                                                                                                                                                                                                                                                                                                                                                                                                                                                                                                                                                                                                                                                                                                                                                                                                                                                                                                                                                                                                                                                                                                                                                                                                                                                                                                                                                                                                                                                                                                                                                                                                                                     |        |         | -4.9   | -13.5            |                | -20.2                                    | -17.4                           | -14.0                      | -4.3                        | -12.2              | -21.3   |             |                   |                                                                     | -6.1    |                    |           |         | 8.3     | -25.9     |         | 18.2      | 11.1    | 0.1     | 1.9     |         |         |         |         |           |         |         |           |         |         |           |         |           |         |         |         |                         |      |      |      |      |      |       |      |      |      |      |      |      |      |      |      |      |      |      |      |      |      |      |      |      |      |                             |       |      |       |      |       |        |       |       |       |       |       |       |       |       |       |       |       |       |       |       |       |       |       |       |       |          |  |  |    |     |    |       |    |    |    |    |  |  |  |  |    |  |  |  |    |       |  |  |    |    |    |           |  |  |      |       |  |       |       |       |      |       |       |  |  |  |      |  |  |  |     |       |  |      |      |     |     |

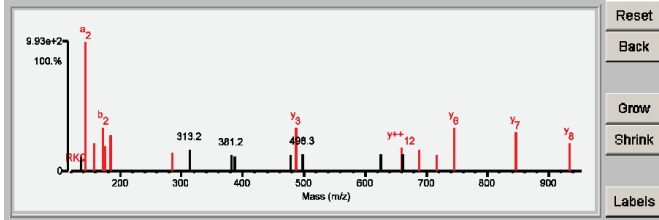

Result Summary

| Rank | Score | SPI (%) | BCS | # Unmatched Ions | Variable sites | Sequence                    | MH <sup>+</sup> Calculated (Da) | MH <sup>+</sup> Error (Da) | MH <sup>+</sup> Error (ppm) | Protein MW (kDa) | Species | Accession # | Protein Name                                                                     |
|------|-------|---------|-----|------------------|----------------|-----------------------------|---------------------------------|----------------------------|-----------------------------|------------------|---------|-------------|----------------------------------------------------------------------------------|
| 1    | 11.39 | 69.3    | 7   | 10/25            | K55k           | (R)GFFKVLGQLTETGVVSEQFMK(S) | 2442.2737                       | 114.0616                   | 7.3                         | 20749.2/8.17     | HUMAN   | Q96EK6      | Glucosamine 6-phosphate N-acetyltransferase OS=Homo sapiens GN=GNPNAT1 PE=1 SV=1 |

Detailed Results

| Rank                    | Score  | SPI (%) | BCS    | # Unmatched Ions | Variable sites | Sequence                    | MH <sup>+</sup> Calculated (Da) | MH <sup>+</sup> Error (Da)                      | MH <sup>+</sup> Error (ppm) | Protein MW (kDa)      | Species | Accession # | MS-Digest Index #                              | Protein Name                                                                     |                                                 |                       |         |                |                |                |                |                 |                        |                 |          |
|-------------------------|--------|---------|--------|------------------|----------------|-----------------------------|---------------------------------|-------------------------------------------------|-----------------------------|-----------------------|---------|-------------|------------------------------------------------|----------------------------------------------------------------------------------|-------------------------------------------------|-----------------------|---------|----------------|----------------|----------------|----------------|-----------------|------------------------|-----------------|----------|
| 1                       | 11.39  | 69.3    | 7      | 10/25            | K55k           | (R)GFFKVLGQLTETGVVSEQFMK(S) | 2442.2737                       | 114.0616                                        | 7.3                         | 20749.2/8.17          | HUMAN   | Q96EK6      | 256965                                         | Glucosamine 6-phosphate N-acetyltransferase OS=Homo sapiens GN=GNPNAT1 PE=1 SV=1 |                                                 |                       |         |                |                |                |                |                 |                        |                 |          |
| Fragment-ion (m/z)      | 72.079 | 85.044  | 86.097 | 102.097          | 120.079        | 407.189                     | 519.292                         | 543.781 <sup>+2</sup>                           | 594.325 <sup>+2</sup>       | 640.375 <sup>+2</sup> | 724.362 | 729.458     | 738.406 <sup>+2</sup>                          | 746.947 <sup>+2</sup>                                                            | 779.361                                         | 787.420 <sup>+2</sup> | 796.933 | 806.441        | 866.415        | 965.475        | 1064.554       | 1121.539        | 1137.553 <sup>+2</sup> | 1222.592        | 1334.679 |
| Frac. Inten. (% of TIC) | 0.15   | 2.49    | 0.23   | 2.91             | 0.14           | 2.91                        | 3.63                            | 3.07                                            | 3.97                        | 3.11                  | 2.69    | 2.67        | 4.20                                           | 3.75                                                                             | 10.44                                           | 3.57                  | 3.35    | 3.56           | 16.77          | 10.74          | 4.59           | 2.58            | 2.83                   | 2.96            | 2.49     |
| Rel. Inten. (% of BP)   | 0.50   | 14.84   | 1.39   | 17.34            | 0.84           | 17.36                       | 21.65                           | 18.33                                           | 23.69                       | 18.52                 | 15.97   | 17.12       | 25.05                                          | 22.38                                                                            | 62.24                                           | 21.23                 | 19.99   | 21.22          | 100.00         | 64.02          | 27.39          | 15.40           | 16.90                  | 17.65           | 14.84    |
| Score                   | 0.50   | -0.15   | 0.22   | -0.17            | 1.00           | 0.75                        | -0.22                           | -0.18                                           | 0.25                        | -0.19                 | -0.16   | -0.17       | 0.25                                           | -0.22                                                                            | 1.50                                            | 0.25                  | -0.20   | 0.50           | 1.50           | 1.50           | 1.50           | 1.50            | 1.50                   | 1.50            | 1.50     |
| Ion-type                | V      |         | LI     |                  | F              | QFM                         |                                 | b <sub>10</sub> -H <sub>2</sub> O <sup>+2</sup> |                             |                       |         |             | b <sub>13</sub> -NH <sub>3</sub> <sup>+2</sup> | y <sub>6</sub>                                                                   | b <sub>14</sub> -H <sub>2</sub> O <sup>+2</sup> |                       |         | b <sub>6</sub> | y <sub>7</sub> | y <sub>6</sub> | y <sub>9</sub> | y <sub>10</sub> | y <sub>11</sub>        | b <sub>11</sub> |          |
| Delta ppm               | -21.9  |         | 3.2    |                  | -11.5          | 31.6                        |                                 |                                                 | -13.6                       |                       |         |             | 34.2                                           | -19.0                                                                            | -3.4                                            |                       |         | -19.8          | 8.2            | -1.4           | 9.3            | -23.9           | -17.5                  | -17.5           | 36.8     |

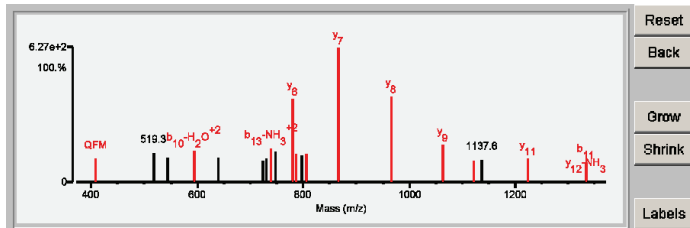

Result Summary

| Rank | Score | SPI (%) | BCS | # Unmatched ions | Variable sites | Sequence         | MH <sup>+</sup> Calculated (Da) | MH <sup>+</sup> Error (Da) | MH <sup>+</sup> Error (ppm) | Protein MW/pI (Da) | Species | Accession # | Protein Name                                                                |
|------|-------|---------|-----|------------------|----------------|------------------|---------------------------------|----------------------------|-----------------------------|--------------------|---------|-------------|-----------------------------------------------------------------------------|
| 1    | 12.77 | 63.1    | 8   | 9/24             | K194k          | (K)TVDGPSGKLR(D) | 1215.6480                       | 114.0506                   | 5.8                         | 36053.4/8.57       | HUMAN   | P04406      | Glyceraldehyde-3-phosphate dehydrogenase OS=Homo sapiens GN=GAPDH PE=1 SV=3 |

Detailed Results

| Rank | Score | SPI (%) | BCS | # Unmatched ions | Variable sites | Sequence         | MH <sup>+</sup> Calculated (Da) | MH <sup>+</sup> Error (Da) | MH <sup>+</sup> Error (ppm) | Protein MW/pI (Da) | Species | Accession # | MS-Digest Index # | Protein Name                                                                |
|------|-------|---------|-----|------------------|----------------|------------------|---------------------------------|----------------------------|-----------------------------|--------------------|---------|-------------|-------------------|-----------------------------------------------------------------------------|
| 1    | 12.77 | 63.1    | 8   | 9/24             | K194k          | (K)TVDGPSGKLR(D) | 1215.6480                       | 114.0506                   | 5.8                         | 36053.4/8.57       | HUMAN   | P04406      | 230149            | Glyceraldehyde-3-phosphate dehydrogenase OS=Homo sapiens GN=GAPDH PE=1 SV=3 |

| Fragment-Ion (m/z)      | 70.063 | 72.081 | 74.058 | 84.079 | 86.094 | 101.069 | 128.103 | 129.104 | 131.125 | 173.127 | 175.119 | 201.110 | 225.110 | 339.133 | 378.133 | 474.271          | 479.273 <sup>+2</sup> | 483.274 | 507.767          | 565.290 <sup>+2</sup>        | 716.418 | 773.426 | 842.433                          | 860.462 |
|-------------------------|--------|--------|--------|--------|--------|---------|---------|---------|---------|---------|---------|---------|---------|---------|---------|------------------|-----------------------|---------|------------------|------------------------------|---------|---------|----------------------------------|---------|
| Frac. Inten. (% of TIC) | 0.01   | 0.14   | 6.85   | 9.44   | 0.09   | 3.79    | 4.01    | 0.11    | 5.37    | 19.93   | 4.84    | 3.29    | 2.86    | 2.67    | 2.66    | 4.36             | 4.64                  | 2.78    | 2.46             | 3.95                         | 2.84    | 6.14    | 2.51                             | 4.26    |
| Rel. Inten. (% of BP)   | 0.06   | 0.69   | 34.37  | 47.38  | 0.44   | 19.03   | 20.11   | 0.57    | 26.96   | 100.00  | 24.26   | 16.51   | 14.36   | 13.38   | 13.33   | 21.85            | 23.26                 | 13.95   | 12.34            | 19.82                        | 14.24   | 30.81   | 12.59                            | 21.40   |
| Score                   | 0.20   | 0.50   | 0.50   | -0.47  | 0.22   | -0.19   | -0.20   | 0.20    | -0.27   | 0.50    | 1.50    | -0.17   | -0.14   | -0.13   | -0.13   | 1.50             | 1.50                  | -0.14   | 1.50             | 1.50                         | 1.50    | 1.50    | 0.50                             | 1.50    |
| Ion-type                | PR     | V      | a1     |        |        | LI      |         | RKQ     |         | a2      | y1      |         |         |         | y3      | y7 <sup>+2</sup> |                       |         | y <sup>++8</sup> | y <sub>9</sub> <sup>+2</sup> | y4      | y5      | y <sub>6</sub> -H <sub>2</sub> O | y6      |
| Delta ppm               | -27.5  | 7.3    | -41.0  |        |        | -23.5   |         | 10.5    |         | -13.6   | 2.0     |         |         |         | -24.1   | -24.1            | 12.0                  |         | -20.3            | -2.3                         | -2.8    | -19.9   | -35.7                            | -13.8   |

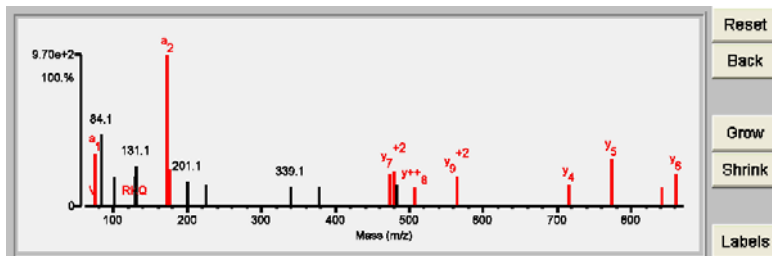



Result Summary

| Rank | Score | SPI (%) | BCS | # Unmatched Ions | Variable sites | Sequence                  | MH <sup>+</sup> Calculated (Da) | MH <sup>+</sup> Error (Da) | MH <sup>+</sup> Error (ppm) | Protein MW/pl (Da) | Species | Accession # | Protein Name                                                                |
|------|-------|---------|-----|------------------|----------------|---------------------------|---------------------------------|----------------------------|-----------------------------|--------------------|---------|-------------|-----------------------------------------------------------------------------|
| 1    | 17.41 | 87.2    | 8   | 4/25             | K215k          | (R)GALQNIIPASTGAAKAVGK(V) | 1767.0123                       | 114.0566                   | 7.3                         | 36053.4/8.57       | HUMAN   | P04406      | Glyceraldehyde-3-phosphate dehydrogenase OS=Homo sapiens GN=GAPDH PE=1 SV=3 |
| 2    | 14.32 | 81.4    | 6   | 6/25             | K219k          | (R)GALQNIIPASTGAAKAVGK(V) | 1767.0123                       | 114.0566                   | 7.3                         | 36053.4/8.57       | HUMAN   | P04406      | Glyceraldehyde-3-phosphate dehydrogenase OS=Homo sapiens GN=GAPDH PE=1 SV=3 |
| 3    | 8.29  | 63.2    | 2   | 12/25            | K679k          | (R)SVPkRTGILQEAQR(R)      | 1767.0599                       | 114.0090                   | -18.0                       | 117514.7/8.75      | HUMAN   | Q9UMS6      | Synaptotodin-2 OS=Homo sapiens GN=SYNPO2 PE=1 SV=2                          |

Detailed Results

| Rank | Score | SPI (%) | BCS | # Unmatched Ions | Variable sites | Sequence                                         | MH <sup>+</sup> Calculated (Da) | MH <sup>+</sup> Error (Da) | MH <sup>+</sup> Error (ppm) | Protein MW/pl (Da) | Species | Accession # | MS-Digest Index # | Protein Name                                                                |
|------|-------|---------|-----|------------------|----------------|--------------------------------------------------|---------------------------------|----------------------------|-----------------------------|--------------------|---------|-------------|-------------------|-----------------------------------------------------------------------------|
| 1    | 17.41 | 87.2    | 8   | 4/25             | K215k          | (R)G A L \ Q N I I P A S T G A A K A V G K ( V ) | 1767.0123                       | 114.0566                   | 7.3                         | 36053.4/8.57       | HUMAN   | P04406      | 115075            | Glyceraldehyde-3-phosphate dehydrogenase OS=Homo sapiens GN=GAPDH PE=1 SV=3 |

  

| Fragment-ion (m/z)     | 70.065 | 84.081 | 86.096 | 101.071 | 169.096 | 173.128 | 199.180 | 200.146 | 204.135 | 228.133 | 242.150 | 339.167 | 341.219 | 356.191 | 374.240 | 467.227               | 469.277           | 484.268           | 568.317 | 577.326 <sup>+2</sup> | 586.330 <sup>+2</sup> | 642.867 <sup>+2</sup> | 687.423 | 815.482 | 1171.646 |
|------------------------|--------|--------|--------|---------|---------|---------|---------|---------|---------|---------|---------|---------|---------|---------|---------|-----------------------|-------------------|-------------------|---------|-----------------------|-----------------------|-----------------------|---------|---------|----------|
| Frac. Inten.(% of TIC) | 0.01   | 0.26   | 1.05   | 0.12    | 3.52    | 2.55    | 4.97    | 3.16    | 3.57    | 3.13    | 5.73    | 2.77    | 3.59    | 4.33    | 2.47    | 2.68                  | 2.49              | 2.96              | 2.74    | 17.43                 | 13.18                 | 2.61                  | 3.04    | 9.15    |          |
| Rel. Inten.(% of BP)   | 0.04   | 1.51   | 6.03   | 0.68    | 20.21   | 14.64   | 28.50   | 18.14   | 20.48   | 17.96   | 32.88   | 15.90   | 20.60   | 24.84   | 14.19   | 14.17                 | 15.38             | 14.29             | 16.96   | 15.73                 | 100.00                | 75.62                 | 14.95   | 17.43   | 52.47    |
| Score                  | 0.20   | 0.50   | 0.22   | 0.50    | 0.75    | -0.15   | -0.28   | 0.50    | 1.50    | 0.75    | 0.75    | -0.16   | 0.75    | 0.75    | 1.50    | 0.25                  | 0.75              | 0.50              | -0.17   | 0.50                  | 1.50                  | 1.50                  | 1.50    | 1.50    | 1.50     |
| Ion-type               | PR     | KQ     | LI     | 82      | PA      | AVG-28  | y2      | AVG     | b3      | NII     | QNI     | y4      | b5-NH3  | QNI     | b5      | y12+H2O <sup>+2</sup> | y12 <sup>+2</sup> | y13 <sup>+2</sup> | y6      | y6                    | y12                   | y6                    | y12     | y12     |          |
| Delta ppm              | -0.4   | 0.3    | -3.8   | -15.2   | -13.3   | 29.2    | 4.6     | -11.2   | -4.6    | LQ      | -4.6    |         |         |         |         |                       |                   |                   |         |                       |                       |                       |         |         |          |

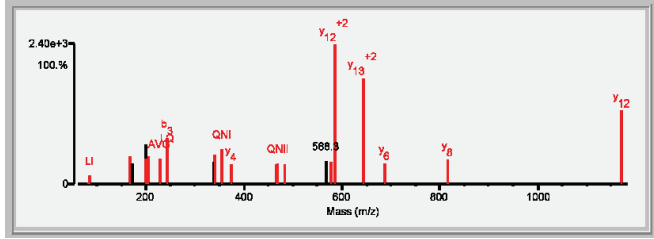

Reset

Back

Grow

Shrink

Labels

Result Summary

| Rank | Score | SPI (%) | BCS | # Unmatched Ions | Variable sites | Sequence                  | MH <sup>+</sup> Calculated (Da) | MH <sup>+</sup> Error (Da) | MH <sup>+</sup> Error (ppm) | Protein MW/pl (Da) | Species | Accession # | Protein Name                                                                                 |
|------|-------|---------|-----|------------------|----------------|---------------------------|---------------------------------|----------------------------|-----------------------------|--------------------|---------|-------------|----------------------------------------------------------------------------------------------|
| 1    | 16.01 | 80.1    | 8   | 7/25             | K219k          | (R)GALQNIIPASTGAAKAVGK(V) | 1767.0123                       | 114.0548                   | 6.3                         | 36053.4/8.57       | HUMAN   | P04406      | Glyceraldehyde-3-phosphate dehydrogenase OS=Homo sapiens GN=GAPDH PE=1 SV=3                  |
| 2    | 15.76 | 80.1    | 8   | 7/25             | K215k          | (R)GALQNIIPASTGAAKAVGK(V) | 1767.0123                       | 114.0548                   | 6.3                         | 36053.4/8.57       | HUMAN   | P04406      | Glyceraldehyde-3-phosphate dehydrogenase OS=Homo sapiens GN=GAPDH PE=1 SV=3                  |
| 3    | 8.05  | 71.1    | 3   | 13/25            | None           | (K)IQQLAARQNLKSR(G)       | 1881.0777                       | -0.0106                    | -5.6                        | 76993.7/6.36       | HUMAN   | RQ8IUC4     | REVERSE Rhophilin-2 OS=Homo sapiens GN=RHPN2 PE=1 SV=1                                       |
| 4    | 5.73  | 54.6    | 2   | 15/25            | None           | (R)EPEKIAIRVQNSLDR(G)     | 1881.0552                       | 0.0119                     | 6.3                         | 147437.9/5.42      | HUMAN   | RQ6ZV16     | REVERSE Mitogen-activated protein kinase kinase 15 OS=Homo sapiens GN=MAP3K15 PE=2 SV=2      |
| 4    | 5.73  | 54.6    | 2   | 15/25            | None           | (R)EPEKIAIRVQNSLDR(G)     | 1881.0552                       | 0.0119                     | 6.3                         | 154537.7/5.52      | HUMAN   | RQ99683     | REVERSE Mitogen-activated protein kinase kinase kinase 5 OS=Homo sapiens GN=MAP3K5 PE=1 SV=1 |

Detailed Results

| Rank                                                                                                                                                                                                                                                                                                                                                                                                                                                                                                                                                                                                                                                                                                                                                                                                                                                                                                                                                                                                                                                                                                                                                                                                                                                                                                                                                                                                                                                                                                                                                                                                                                                                                                                                                                                                                                                                                                                                                                                                                                                                                                                                                                                                                                                                                                                                                                                                                                                                                                                    | Score  | SPI (%) | BCS    | # Unmatched Ions | Variable sites | Sequence                                     | MH <sup>+</sup> Calculated (Da) | MH <sup>+</sup> Error (Da) | MH <sup>+</sup> Error (ppm) | Protein MW/pl (Da) | Species | Accession # | MS-Digest Index # | Protein Name                                                                |                    |         |         |         |                       |                       |         |         |         |          |          |         |         |         |         |         |         |         |         |                       |                       |         |         |         |          |          |                         |      |      |      |      |      |      |      |      |      |      |      |      |      |      |      |      |      |      |       |       |      |      |      |      |      |                       |      |       |      |      |       |      |       |       |       |       |       |       |       |       |       |       |       |       |        |       |       |       |       |       |       |       |      |       |      |      |       |      |       |      |      |       |      |      |       |       |      |       |      |      |      |      |      |      |      |      |      |          |    |    |    |    |    |    |    |     |     |    |     |    |     |     |    |   |   |   |   |   |   |   |   |   |   |           |      |       |      |  |       |  |  |       |        |    |       |       |  |  |      |       |      |  |     |     |      |      |      |     |     |
|-------------------------------------------------------------------------------------------------------------------------------------------------------------------------------------------------------------------------------------------------------------------------------------------------------------------------------------------------------------------------------------------------------------------------------------------------------------------------------------------------------------------------------------------------------------------------------------------------------------------------------------------------------------------------------------------------------------------------------------------------------------------------------------------------------------------------------------------------------------------------------------------------------------------------------------------------------------------------------------------------------------------------------------------------------------------------------------------------------------------------------------------------------------------------------------------------------------------------------------------------------------------------------------------------------------------------------------------------------------------------------------------------------------------------------------------------------------------------------------------------------------------------------------------------------------------------------------------------------------------------------------------------------------------------------------------------------------------------------------------------------------------------------------------------------------------------------------------------------------------------------------------------------------------------------------------------------------------------------------------------------------------------------------------------------------------------------------------------------------------------------------------------------------------------------------------------------------------------------------------------------------------------------------------------------------------------------------------------------------------------------------------------------------------------------------------------------------------------------------------------------------------------|--------|---------|--------|------------------|----------------|----------------------------------------------|---------------------------------|----------------------------|-----------------------------|--------------------|---------|-------------|-------------------|-----------------------------------------------------------------------------|--------------------|---------|---------|---------|-----------------------|-----------------------|---------|---------|---------|----------|----------|---------|---------|---------|---------|---------|---------|---------|---------|-----------------------|-----------------------|---------|---------|---------|----------|----------|-------------------------|------|------|------|------|------|------|------|------|------|------|------|------|------|------|------|------|------|------|-------|-------|------|------|------|------|------|-----------------------|------|-------|------|------|-------|------|-------|-------|-------|-------|-------|-------|-------|-------|-------|-------|-------|-------|--------|-------|-------|-------|-------|-------|-------|-------|------|-------|------|------|-------|------|-------|------|------|-------|------|------|-------|-------|------|-------|------|------|------|------|------|------|------|------|------|----------|----|----|----|----|----|----|----|-----|-----|----|-----|----|-----|-----|----|---|---|---|---|---|---|---|---|---|---|-----------|------|-------|------|--|-------|--|--|-------|--------|----|-------|-------|--|--|------|-------|------|--|-----|-----|------|------|------|-----|-----|
| 1                                                                                                                                                                                                                                                                                                                                                                                                                                                                                                                                                                                                                                                                                                                                                                                                                                                                                                                                                                                                                                                                                                                                                                                                                                                                                                                                                                                                                                                                                                                                                                                                                                                                                                                                                                                                                                                                                                                                                                                                                                                                                                                                                                                                                                                                                                                                                                                                                                                                                                                       | 16.01  | 80.1    | 8      | 7/25             | K219k          | (R)G A L Q N I I P A S T G A A K A V G K (V) | 1767.0123                       | 114.0548                   | 6.3                         | 36053.4/8.57       | HUMAN   | P04406      | 230149            | Glyceraldehyde-3-phosphate dehydrogenase OS=Homo sapiens GN=GAPDH PE=1 SV=3 |                    |         |         |         |                       |                       |         |         |         |          |          |         |         |         |         |         |         |         |         |                       |                       |         |         |         |          |          |                         |      |      |      |      |      |      |      |      |      |      |      |      |      |      |      |      |      |      |       |       |      |      |      |      |      |                       |      |       |      |      |       |      |       |       |       |       |       |       |       |       |       |       |       |       |        |       |       |       |       |       |       |       |      |       |      |      |       |      |       |      |      |       |      |      |       |       |      |       |      |      |      |      |      |      |      |      |      |          |    |    |    |    |    |    |    |     |     |    |     |    |     |     |    |   |   |   |   |   |   |   |   |   |   |           |      |       |      |  |       |  |  |       |        |    |       |       |  |  |      |       |      |  |     |     |      |      |      |     |     |
| <table border="1"> <thead> <tr> <th>Fragment-Ion (m/z)</th> <th>70.065</th> <th>84.042</th> <th>84.080</th> <th>86.096</th> <th>87.101</th> <th>101.069</th> <th>129.096</th> <th>200.135</th> <th>228.134</th> <th>240.136</th> <th>242.147</th> <th>256.122</th> <th>313.174</th> <th>339.163</th> <th>356.190</th> <th>466.224</th> <th>469.272</th> <th>484.264</th> <th>586.322<sup>+2</sup></th> <th>642.873<sup>+2</sup></th> <th>687.427</th> <th>756.443</th> <th>815.469</th> <th>1003.559</th> <th>1171.643</th> </tr> </thead> <tbody> <tr> <td>Frac. Inten. (% of TIC)</td> <td>0.01</td> <td>2.88</td> <td>0.20</td> <td>1.00</td> <td>2.76</td> <td>0.11</td> <td>2.95</td> <td>4.41</td> <td>4.17</td> <td>2.85</td> <td>3.81</td> <td>3.57</td> <td>2.61</td> <td>3.70</td> <td>2.42</td> <td>2.90</td> <td>3.39</td> <td>2.44</td> <td>22.75</td> <td>12.32</td> <td>2.48</td> <td>2.89</td> <td>2.69</td> <td>2.64</td> <td>8.05</td> </tr> <tr> <td>Rel. Inten. (% of BP)</td> <td>0.03</td> <td>12.65</td> <td>0.87</td> <td>4.41</td> <td>12.14</td> <td>0.49</td> <td>12.96</td> <td>19.37</td> <td>18.32</td> <td>12.52</td> <td>16.75</td> <td>15.70</td> <td>11.48</td> <td>16.25</td> <td>10.63</td> <td>12.75</td> <td>14.89</td> <td>10.72</td> <td>100.00</td> <td>54.16</td> <td>10.90</td> <td>12.72</td> <td>11.83</td> <td>11.61</td> <td>35.38</td> </tr> <tr> <td>Score</td> <td>0.20</td> <td>-0.13</td> <td>0.50</td> <td>0.22</td> <td>-0.12</td> <td>0.50</td> <td>-0.13</td> <td>0.75</td> <td>0.75</td> <td>-0.13</td> <td>0.75</td> <td>0.75</td> <td>-0.11</td> <td>-0.16</td> <td>0.75</td> <td>-0.13</td> <td>0.75</td> <td>0.50</td> <td>1.50</td> <td>1.50</td> <td>1.50</td> <td>1.50</td> <td>1.50</td> <td>1.50</td> <td>1.50</td> </tr> <tr> <td>Ion-type</td> <td>FR</td> <td>KQ</td> <td>KQ</td> <td>LI</td> <td>LI</td> <td>Q2</td> <td>KA</td> <td>AVG</td> <td>AVG</td> <td>b3</td> <td>PAS</td> <td>b3</td> <td>QNI</td> <td>QNI</td> <td>bs</td> <td>+</td> </tr> <tr> <td>Delta ppm</td> <td>-7.5</td> <td>-14.0</td> <td>-4.9</td> <td></td> <td>-27.1</td> <td></td> <td></td> <td>-26.7</td> <td>PAS-28</td> <td>LQ</td> <td>-18.6</td> <td>-30.8</td> <td></td> <td></td> <td>-9.9</td> <td>-13.9</td> <td>24.1</td> <td></td> <td>4.8</td> <td>8.5</td> <td>17.9</td> <td>15.8</td> <td>-5.7</td> <td>6.3</td> <td>0.4</td> </tr> </tbody> </table> |        |         |        |                  |                |                                              |                                 |                            |                             |                    |         |             |                   |                                                                             | Fragment-Ion (m/z) | 70.065  | 84.042  | 84.080  | 86.096                | 87.101                | 101.069 | 129.096 | 200.135 | 228.134  | 240.136  | 242.147 | 256.122 | 313.174 | 339.163 | 356.190 | 466.224 | 469.272 | 484.264 | 586.322 <sup>+2</sup> | 642.873 <sup>+2</sup> | 687.427 | 756.443 | 815.469 | 1003.559 | 1171.643 | Frac. Inten. (% of TIC) | 0.01 | 2.88 | 0.20 | 1.00 | 2.76 | 0.11 | 2.95 | 4.41 | 4.17 | 2.85 | 3.81 | 3.57 | 2.61 | 3.70 | 2.42 | 2.90 | 3.39 | 2.44 | 22.75 | 12.32 | 2.48 | 2.89 | 2.69 | 2.64 | 8.05 | Rel. Inten. (% of BP) | 0.03 | 12.65 | 0.87 | 4.41 | 12.14 | 0.49 | 12.96 | 19.37 | 18.32 | 12.52 | 16.75 | 15.70 | 11.48 | 16.25 | 10.63 | 12.75 | 14.89 | 10.72 | 100.00 | 54.16 | 10.90 | 12.72 | 11.83 | 11.61 | 35.38 | Score | 0.20 | -0.13 | 0.50 | 0.22 | -0.12 | 0.50 | -0.13 | 0.75 | 0.75 | -0.13 | 0.75 | 0.75 | -0.11 | -0.16 | 0.75 | -0.13 | 0.75 | 0.50 | 1.50 | 1.50 | 1.50 | 1.50 | 1.50 | 1.50 | 1.50 | Ion-type | FR | KQ | KQ | LI | LI | Q2 | KA | AVG | AVG | b3 | PAS | b3 | QNI | QNI | bs | + | + | + | + | + | + | + | + | + | + | Delta ppm | -7.5 | -14.0 | -4.9 |  | -27.1 |  |  | -26.7 | PAS-28 | LQ | -18.6 | -30.8 |  |  | -9.9 | -13.9 | 24.1 |  | 4.8 | 8.5 | 17.9 | 15.8 | -5.7 | 6.3 | 0.4 |
| Fragment-Ion (m/z)                                                                                                                                                                                                                                                                                                                                                                                                                                                                                                                                                                                                                                                                                                                                                                                                                                                                                                                                                                                                                                                                                                                                                                                                                                                                                                                                                                                                                                                                                                                                                                                                                                                                                                                                                                                                                                                                                                                                                                                                                                                                                                                                                                                                                                                                                                                                                                                                                                                                                                      | 70.065 | 84.042  | 84.080 | 86.096           | 87.101         | 101.069                                      | 129.096                         | 200.135                    | 228.134                     | 240.136            | 242.147 | 256.122     | 313.174           | 339.163                                                                     | 356.190            | 466.224 | 469.272 | 484.264 | 586.322 <sup>+2</sup> | 642.873 <sup>+2</sup> | 687.427 | 756.443 | 815.469 | 1003.559 | 1171.643 |         |         |         |         |         |         |         |         |                       |                       |         |         |         |          |          |                         |      |      |      |      |      |      |      |      |      |      |      |      |      |      |      |      |      |      |       |       |      |      |      |      |      |                       |      |       |      |      |       |      |       |       |       |       |       |       |       |       |       |       |       |       |        |       |       |       |       |       |       |       |      |       |      |      |       |      |       |      |      |       |      |      |       |       |      |       |      |      |      |      |      |      |      |      |      |          |    |    |    |    |    |    |    |     |     |    |     |    |     |     |    |   |   |   |   |   |   |   |   |   |   |           |      |       |      |  |       |  |  |       |        |    |       |       |  |  |      |       |      |  |     |     |      |      |      |     |     |
| Frac. Inten. (% of TIC)                                                                                                                                                                                                                                                                                                                                                                                                                                                                                                                                                                                                                                                                                                                                                                                                                                                                                                                                                                                                                                                                                                                                                                                                                                                                                                                                                                                                                                                                                                                                                                                                                                                                                                                                                                                                                                                                                                                                                                                                                                                                                                                                                                                                                                                                                                                                                                                                                                                                                                 | 0.01   | 2.88    | 0.20   | 1.00             | 2.76           | 0.11                                         | 2.95                            | 4.41                       | 4.17                        | 2.85               | 3.81    | 3.57        | 2.61              | 3.70                                                                        | 2.42               | 2.90    | 3.39    | 2.44    | 22.75                 | 12.32                 | 2.48    | 2.89    | 2.69    | 2.64     | 8.05     |         |         |         |         |         |         |         |         |                       |                       |         |         |         |          |          |                         |      |      |      |      |      |      |      |      |      |      |      |      |      |      |      |      |      |      |       |       |      |      |      |      |      |                       |      |       |      |      |       |      |       |       |       |       |       |       |       |       |       |       |       |       |        |       |       |       |       |       |       |       |      |       |      |      |       |      |       |      |      |       |      |      |       |       |      |       |      |      |      |      |      |      |      |      |      |          |    |    |    |    |    |    |    |     |     |    |     |    |     |     |    |   |   |   |   |   |   |   |   |   |   |           |      |       |      |  |       |  |  |       |        |    |       |       |  |  |      |       |      |  |     |     |      |      |      |     |     |
| Rel. Inten. (% of BP)                                                                                                                                                                                                                                                                                                                                                                                                                                                                                                                                                                                                                                                                                                                                                                                                                                                                                                                                                                                                                                                                                                                                                                                                                                                                                                                                                                                                                                                                                                                                                                                                                                                                                                                                                                                                                                                                                                                                                                                                                                                                                                                                                                                                                                                                                                                                                                                                                                                                                                   | 0.03   | 12.65   | 0.87   | 4.41             | 12.14          | 0.49                                         | 12.96                           | 19.37                      | 18.32                       | 12.52              | 16.75   | 15.70       | 11.48             | 16.25                                                                       | 10.63              | 12.75   | 14.89   | 10.72   | 100.00                | 54.16                 | 10.90   | 12.72   | 11.83   | 11.61    | 35.38    |         |         |         |         |         |         |         |         |                       |                       |         |         |         |          |          |                         |      |      |      |      |      |      |      |      |      |      |      |      |      |      |      |      |      |      |       |       |      |      |      |      |      |                       |      |       |      |      |       |      |       |       |       |       |       |       |       |       |       |       |       |       |        |       |       |       |       |       |       |       |      |       |      |      |       |      |       |      |      |       |      |      |       |       |      |       |      |      |      |      |      |      |      |      |      |          |    |    |    |    |    |    |    |     |     |    |     |    |     |     |    |   |   |   |   |   |   |   |   |   |   |           |      |       |      |  |       |  |  |       |        |    |       |       |  |  |      |       |      |  |     |     |      |      |      |     |     |
| Score                                                                                                                                                                                                                                                                                                                                                                                                                                                                                                                                                                                                                                                                                                                                                                                                                                                                                                                                                                                                                                                                                                                                                                                                                                                                                                                                                                                                                                                                                                                                                                                                                                                                                                                                                                                                                                                                                                                                                                                                                                                                                                                                                                                                                                                                                                                                                                                                                                                                                                                   | 0.20   | -0.13   | 0.50   | 0.22             | -0.12          | 0.50                                         | -0.13                           | 0.75                       | 0.75                        | -0.13              | 0.75    | 0.75        | -0.11             | -0.16                                                                       | 0.75               | -0.13   | 0.75    | 0.50    | 1.50                  | 1.50                  | 1.50    | 1.50    | 1.50    | 1.50     | 1.50     |         |         |         |         |         |         |         |         |                       |                       |         |         |         |          |          |                         |      |      |      |      |      |      |      |      |      |      |      |      |      |      |      |      |      |      |       |       |      |      |      |      |      |                       |      |       |      |      |       |      |       |       |       |       |       |       |       |       |       |       |       |       |        |       |       |       |       |       |       |       |      |       |      |      |       |      |       |      |      |       |      |      |       |       |      |       |      |      |      |      |      |      |      |      |      |          |    |    |    |    |    |    |    |     |     |    |     |    |     |     |    |   |   |   |   |   |   |   |   |   |   |           |      |       |      |  |       |  |  |       |        |    |       |       |  |  |      |       |      |  |     |     |      |      |      |     |     |
| Ion-type                                                                                                                                                                                                                                                                                                                                                                                                                                                                                                                                                                                                                                                                                                                                                                                                                                                                                                                                                                                                                                                                                                                                                                                                                                                                                                                                                                                                                                                                                                                                                                                                                                                                                                                                                                                                                                                                                                                                                                                                                                                                                                                                                                                                                                                                                                                                                                                                                                                                                                                | FR     | KQ      | KQ     | LI               | LI             | Q2                                           | KA                              | AVG                        | AVG                         | b3                 | PAS     | b3          | QNI               | QNI                                                                         | bs                 | +       | +       | +       | +                     | +                     | +       | +       | +       | +        | +        |         |         |         |         |         |         |         |         |                       |                       |         |         |         |          |          |                         |      |      |      |      |      |      |      |      |      |      |      |      |      |      |      |      |      |      |       |       |      |      |      |      |      |                       |      |       |      |      |       |      |       |       |       |       |       |       |       |       |       |       |       |       |        |       |       |       |       |       |       |       |      |       |      |      |       |      |       |      |      |       |      |      |       |       |      |       |      |      |      |      |      |      |      |      |      |          |    |    |    |    |    |    |    |     |     |    |     |    |     |     |    |   |   |   |   |   |   |   |   |   |   |           |      |       |      |  |       |  |  |       |        |    |       |       |  |  |      |       |      |  |     |     |      |      |      |     |     |
| Delta ppm                                                                                                                                                                                                                                                                                                                                                                                                                                                                                                                                                                                                                                                                                                                                                                                                                                                                                                                                                                                                                                                                                                                                                                                                                                                                                                                                                                                                                                                                                                                                                                                                                                                                                                                                                                                                                                                                                                                                                                                                                                                                                                                                                                                                                                                                                                                                                                                                                                                                                                               | -7.5   | -14.0   | -4.9   |                  | -27.1          |                                              |                                 | -26.7                      | PAS-28                      | LQ                 | -18.6   | -30.8       |                   |                                                                             | -9.9               | -13.9   | 24.1    |         | 4.8                   | 8.5                   | 17.9    | 15.8    | -5.7    | 6.3      | 0.4      |         |         |         |         |         |         |         |         |                       |                       |         |         |         |          |          |                         |      |      |      |      |      |      |      |      |      |      |      |      |      |      |      |      |      |      |       |       |      |      |      |      |      |                       |      |       |      |      |       |      |       |       |       |       |       |       |       |       |       |       |       |       |        |       |       |       |       |       |       |       |      |       |      |      |       |      |       |      |      |       |      |      |       |       |      |       |      |      |      |      |      |      |      |      |      |          |    |    |    |    |    |    |    |     |     |    |     |    |     |     |    |   |   |   |   |   |   |   |   |   |   |           |      |       |      |  |       |  |  |       |        |    |       |       |  |  |      |       |      |  |     |     |      |      |      |     |     |

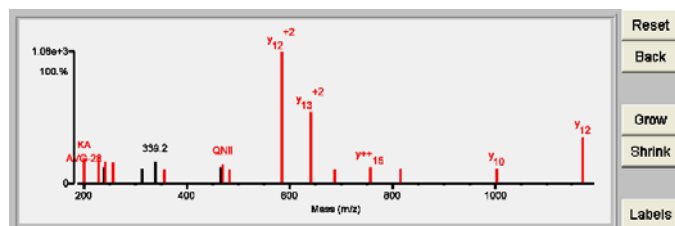

Result Summary

| Rank | Score | SPI (%) | BCS | # Unmatched Ions | Variable sites | Sequence               | MH <sup>+</sup> Calculated (Da) | MH <sup>+</sup> Error (Da) | MH <sup>+</sup> Error (ppm) | Protein MW pI (Da) | Species | Accession # | Protein Name                                        |
|------|-------|---------|-----|------------------|----------------|------------------------|---------------------------------|----------------------------|-----------------------------|--------------------|---------|-------------|-----------------------------------------------------|
| 1    | 9.02  | 67.4    | 6   | 14/25            | K216k          | (K)LTkAICGLIDDYSMVR(F) | 1854.9452                       | 114.0660                   | 11.7                        | 32761.5/4.38       | HUMAN   | Q9UHW5      | GPN-loop GTPase 3 OS=Homo sapiens GN=GPN3 PE=1 SV=2 |

Detailed Results

| Rank | Score | SPI (%) | BCS | # Unmatched Ions | Variable sites | Sequence               | MH <sup>+</sup> Calculated (Da) | MH <sup>+</sup> Error (Da) | MH <sup>+</sup> Error (ppm) | Protein MW pI (Da) | Species | Accession # | MS-Digest Index # | Protein Name                                        |
|------|-------|---------|-----|------------------|----------------|------------------------|---------------------------------|----------------------------|-----------------------------|--------------------|---------|-------------|-------------------|-----------------------------------------------------|
| 1    | 9.02  | 67.4    | 6   | 14/25            | K216k          | (K)LTkAICGLIDDYSMVR(F) | 1854.9452                       | 114.0660                   | 11.7                        | 32761.5/4.38       | HUMAN   | Q9UHW5      | 261527            | GPN-loop GTPase 3 OS=Homo sapiens GN=GPN3 PE=1 SV=2 |

  

| Fragment-ion (m/z)      | 70.065 | 84.044 | 84.082 | 86.095 | 89.057 | 102.052 | 136.076 | 175.117 | 187.150 | 357.713 <sup>+2</sup> | 421.236 | 442.229 | 450.296 <sup>+2</sup> | 472.277 | 472.777 | 486.261 | 492.268 | 728.323 | 757.411 | 770.350 | 858.450 | 885.381 | 971.541 | 998.458 | 1110.586 |
|-------------------------|--------|--------|--------|--------|--------|---------|---------|---------|---------|-----------------------|---------|---------|-----------------------|---------|---------|---------|---------|---------|---------|---------|---------|---------|---------|---------|----------|
| Frac. Inten. (% of TIC) | 0.00   | 1.81   | 2.21   | 19.43  | 3.77   | 2.13    | 0.09    | 3.05    | 2.36    | 2.39                  | 1.90    | 1.87    | 2.29                  | 3.20    | 3.15    | 2.26    | 4.13    | 1.85    | 1.99    | 5.20    | 5.06    | 15.72   | 7.29    | 5.03    | 1.79     |
| Rel. Inten. (% of BP)   | 0.02   | 9.32   | 11.35  | 100.00 | 19.40  | 10.97   | 0.48    | 15.70   | 12.14   | 12.31                 | 9.79    | 9.63    | 11.80                 | 16.48   | 16.22   | 11.64   | 21.24   | 9.52    | 10.24   | 26.78   | 26.05   | 80.92   | 37.51   | 25.90   | 9.23     |
| Score                   | 0.20   | -0.09  | -0.11  | 0.50   | -0.19  | -0.11   | 1.00    | 1.50    | 0.50    | -0.12                 | -0.10   | -0.10   | -0.12                 | -0.16   | -0.16   | -0.12   | 1.50    | -0.10   | -0.10   | 1.50    | 0.50    | 1.50    | 0.50    | 1.50    | -0.09    |
| Ion-type                | PR     |        |        | a1     |        |         | Y       | y1      | a2      |                       |         |         |                       |         |         |         | y4      |         |         | y6      | b7      | y7      | b8      | y8      |          |
| Delta ppm               | -0.4   |        |        | -24.7  |        |         | 3.0     | -12.3   | 27.2    |                       |         |         |                       |         |         |         | 16.9    |         |         | 0.2     | -1.5    | 4.8     | 5.4     | -3.4    |          |

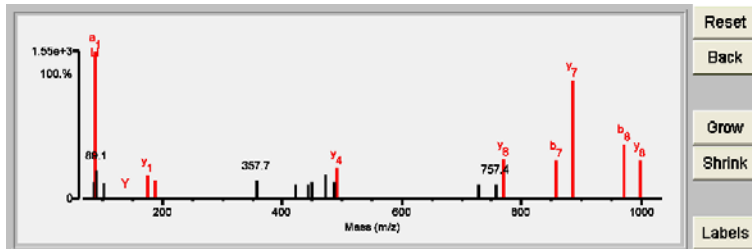

Result Summary

| Rank | Score | SPI (%) | BCS | # Unmatched Ions | Variable sites | Sequence                  | MH <sup>+</sup> Calculated (Da) | MH <sup>+</sup> Error (Da) | MH <sup>+</sup> Error (ppm) | Protein MW/pI (Da) | Species | Accession # | Protein Name                                                                                     |
|------|-------|---------|-----|------------------|----------------|---------------------------|---------------------------------|----------------------------|-----------------------------|--------------------|---------|-------------|--------------------------------------------------------------------------------------------------|
| 1    | 16.26 | 78.5    | 10  | 7/25             | K18k K29k      | (R)MDKVGDALEEVLSKALSQR(T) | 2089.0958                       | 228.0976                   | 5.1                         | 18335.9/4.36       | HUMAN   | P24522      | Growth arrest and DNA-damage-inducible protein GADD45 alpha OS=Homo sapiens GN=GADD45A PE=1 SV=1 |

Detailed Results

| Rank | Score | SPI (%) | BCS | # Unmatched Ions | Variable sites | Sequence                  | MH <sup>+</sup> Calculated (Da) | MH <sup>+</sup> Error (Da) | MH <sup>+</sup> Error (ppm) | Protein MW/pI (Da) | Species | Accession # | MS-Digest Index # | Protein Name                                                                                     |
|------|-------|---------|-----|------------------|----------------|---------------------------|---------------------------------|----------------------------|-----------------------------|--------------------|---------|-------------|-------------------|--------------------------------------------------------------------------------------------------|
| 1    | 16.26 | 78.5    | 10  | 7/25             | K18k K29k      | (R)MDKVGDALEEVLSKALSQR(T) | 2089.0958                       | 228.0976                   | 5.1                         | 18335.9/4.36       | HUMAN   | P24522      | 231797            | Growth arrest and DNA-damage-inducible protein GADD45 alpha OS=Homo sapiens GN=GADD45A PE=1 SV=1 |

| Fragment-ion (m/z)     | 72.081 | 84.081 | 86.097 | 87.101 | 104.052 | 136.075 | 269.094 | 380.207 <sup>+2</sup> | 390.210 | 452.253 <sup>+2</sup> | 472.232 <sup>+2</sup> | 496.015 <sup>+4</sup> | 503.294 | 514.287 <sup>+2</sup> | 574.331 | 588.278 | 594.015 <sup>+2</sup> | 622.842 <sup>+2</sup> | 678.386 <sup>+2</sup> | 687.369 <sup>+2</sup> | 816.464 | 831.363 | 903.501           | 907.928 <sup>+2</sup> | 1016.593 |
|------------------------|--------|--------|--------|--------|---------|---------|---------|-----------------------|---------|-----------------------|-----------------------|-----------------------|---------|-----------------------|---------|---------|-----------------------|-----------------------|-----------------------|-----------------------|---------|---------|-------------------|-----------------------|----------|
| Frac. Inten.(% of TIC) | 0.25   | 0.18   | 0.64   | 2.69   | 4.98    | 2.84    | 2.94    | 2.61                  | 12.51   | 6.58                  | 3.95                  | 2.80                  | 7.21    | 3.74                  | 6.40    | 3.72    | 2.84                  | 2.82                  | 3.33                  | 4.88                  | 4.82    | 5.04    | 6.50              | 2.73                  | 3.02     |
| Rel. Inten.(% of BP)   | 2.00   | 1.47   | 5.09   | 21.48  | 39.79   | 22.72   | 23.50   | 20.86                 | 100.00  | 52.65                 | 31.57                 | 22.38                 | 57.65   | 29.90                 | 51.18   | 29.73   | 22.75                 | 22.51                 | 26.62                 | 39.02                 | 33.51   | 40.29   | 52.00             | 21.81                 | 24.14    |
| Score                  | 0.50   | 0.50   | 0.22   | -0.21  | 0.50    | -0.23   | 0.75    | -0.21                 | 1.50    | 1.50                  | -0.32                 | -0.22                 | 1.50    | -0.30                 | 1.50    | 0.50    | 1.50                  | 0.50                  | 1.50                  | 1.50                  | 0.50    | 0.50    | 1.50              | 1.50                  | 1.50     |
| Ion-type               | V      | KQ     | LI     | a1     |         | EE      | EE      | y3                    | y3      | y <sup>+2</sup>       | y <sup>+2</sup>       | y4                    | y4      | y5                    | y5      | b4      | y10 <sup>+2</sup>     | y11-H2O <sup>+2</sup> | y11 <sup>+2</sup>     | y8                    | b7      | y7      | b15 <sup>+2</sup> | y6                    |          |
| Delta ppm              | -1.0   | -2.1   | 6.7    |        | -14.8   |         | 0.9     |                       | 0.4     | -1.9                  |                       |                       |         | -0.0                  | 0.6     | -7.8    |                       | -15.6                 | 26.8                  | -5.2                  | -5.3    | -5.9    | -0.1              | -25.8                 | 7.9      |

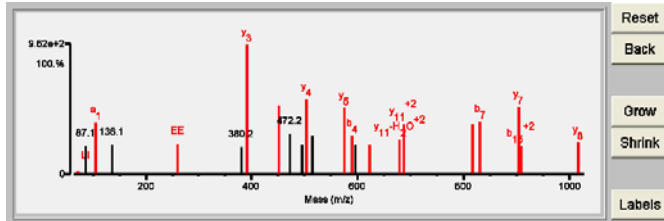



Result Summary

| Rank | Score | SPI (%) | BCS | # Unmatched Ions | Variable sites | Sequence            | MH <sup>+</sup> Calculated (Da) | MH <sup>+</sup> Error (Da) | MH <sup>+</sup> Error (ppm) | Protein MW (Da) | Species | Accession # | Protein Name                                                     |
|------|-------|---------|-----|------------------|----------------|---------------------|---------------------------------|----------------------------|-----------------------------|-----------------|---------|-------------|------------------------------------------------------------------|
| 1    | 16.97 | 69.7    | 8   | 8/25             | K159k          | (K)SNYNFEkPFLWLR(K) | 1784.9119                       | 114.0557                   | 6.7                         | 24423.27.01     | HUMAN   | P62826      | GTP-binding nuclear protein Ran OS=Homo sapiens GN=RAN PE=1 SV=3 |

Detailed Results

| Rank                    | Score | SPI (%) | BCS    | # Unmatched Ions | Variable sites | Sequence                         | MH <sup>+</sup> Calculated (Da) | MH <sup>+</sup> Error (Da) | MH <sup>+</sup> Error (ppm) | Protein MW (Da) | Species | Accession # | MS-Digest Index # | Protein Name                                                     |         |         |                  |                       |         |                       |                       |         |         |                       |         |         |
|-------------------------|-------|---------|--------|------------------|----------------|----------------------------------|---------------------------------|----------------------------|-----------------------------|-----------------|---------|-------------|-------------------|------------------------------------------------------------------|---------|---------|------------------|-----------------------|---------|-----------------------|-----------------------|---------|---------|-----------------------|---------|---------|
| 1                       | 16.97 | 69.7    | 8      | 8/25             | K159k          | (K)S N Y N F E k P F L W L R (K) | 1784.9119                       | 114.0557                   | 6.7                         | 24423.27.01     | HUMAN   | P62826      | 556919            | GTP-binding nuclear protein Ran OS=Homo sapiens GN=RAN PE=1 SV=3 |         |         |                  |                       |         |                       |                       |         |         |                       |         |         |
| Fragment-Ion (m/z)      |       | 60.043  | 70.063 | 72.078           | 84.080         | 86.095                           | 115.049                         | 120.078                    | 136.075                     | 159.089         | 202.081 | 245.127     | 246.149           | 264.652                                                          | 278.105 | 359.241 | 415.214          | 451.761 <sup>+2</sup> | 545.315 | 573.331 <sup>+2</sup> | 580.766 <sup>+2</sup> | 584.321 | 658.394 | 710.892 <sup>+2</sup> | 805.480 | 902.526 |
| Frac. Inten. (% of TIC) |       | 7.14    | 0.00   | 2.35             | 13.28          | 0.24                             | 2.45                            | 0.15                       | 0.14                        | 0.08            | 8.17    | 2.54        | 2.79              | 2.44                                                             | 2.85    | 4.49    | 2.26             | 4.42                  | 8.32    | 2.73                  | 2.45                  | 2.35    | 6.05    | 2.92                  | 3.86    | 15.54   |
| Rel. Inten. (% of BP)   |       | 45.97   | 0.02   | 15.10            | 85.45          | 1.55                             | 15.78                           | 0.99                       | 0.89                        | 0.50            | 52.58   | 16.37       | 17.93             | 15.73                                                            | 18.37   | 28.89   | 14.56            | 28.43                 | 53.54   | 17.59                 | 15.75                 | 15.10   | 38.93   | 18.82                 | 24.85   | 100.00  |
| Score                   |       | 0.50    | 0.20   | -0.15            | -0.85          | 0.22                             | -0.16                           | 1.00                       | 1.00                        | 2.00            | 0.50    | 0.75        | 1.50              | -0.16                                                            | 0.75    | 1.50    | -0.15            | 1.50                  | 1.50    | -0.18                 | -0.16                 | -0.15   | 1.50    | 1.50                  | 1.50    | 1.50    |
| Ion-type                |       | a1      | PR     |                  |                | LI                               |                                 | F                          | Y                           | W               | b2      | PF          | y2                | YN                                                               | y3      |         | y7 <sup>+2</sup> | y4                    |         |                       |                       |         | y5      | y10 <sup>+2</sup>     | y6      | y7      |
| Delta ppm               |       | -38.1   | -28.9  |                  |                | -17.7                            |                                 | -23.1                      | -4.3                        | -14.9           | -13.0   | -12.0       | -27.5             |                                                                  | -36.1   | 2.4     |                  | -11.0                 | -7.4    |                       |                       |         | -14.6   | 2.4                   | 9.8     | 1.9     |

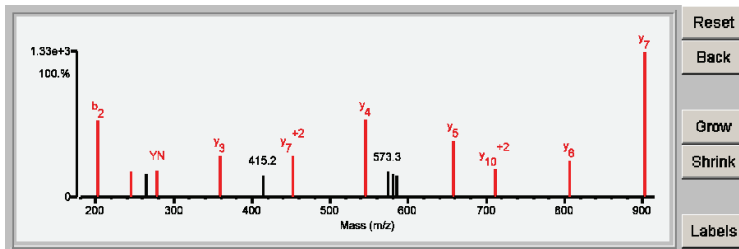

Reset  
Back  
Grow  
Shrink  
Labels

Result Summary

| Rank | Score | SPI (%) | BCS | # Unmatched Ions | Variable sites | Sequence                  | MH <sup>+</sup> Calculated (Da) | MH <sup>+</sup> Error (Da) | MH <sup>+</sup> Error (ppm) | Protein MW (Da) | Species | Accession #             | Protein Name                                                                                           |
|------|-------|---------|-----|------------------|----------------|---------------------------|---------------------------------|----------------------------|-----------------------------|-----------------|---------|-------------------------|--------------------------------------------------------------------------------------------------------|
| 1    | 12.23 | 76.4    | 8   | 10/25            | K829k          | (K)IDVIKQADYVPSDQDLLR(C)  | 2088.0972                       | 114.0654                   | 10.2                        | 111025.1/4.91   | HUMAN   | <a href="#">Q5JWF2</a>  | Guanine nucleotide-binding protein G(s) subunit alpha isoforms XLas OS=Homo sapiens GN=GNAS PE=1 SV=2  |
| 1    | 12.23 | 76.4    | 8   | 10/25            | K186k          | (K)IDVIKQADYVPSDQDLLR(C)  | 2088.0972                       | 114.0654                   | 10.2                        | 45664.8/5.59    | HUMAN   | <a href="#">P63092</a>  | Guanine nucleotide-binding protein G(s) subunit alpha isoforms short OS=Homo sapiens GN=GNAS PE=1 SV=1 |
| 2    | 7.85  | 72.3    | 5   | 12/25            | K226k          | (R)VLDFSPNLKKGTEELR(L)    | 2088.1335                       | 114.0290                   | -6.3                        | 62565.0/8.68    | HUMAN   | <a href="#">R015244</a> | REVERSE Solute carrier family 22 member 2 OS=Homo sapiens GN=SLC22A2 PE=1 SV=1                         |
| 3    | 6.43  | 57.3    | 3   | 16/25            | M236m          | (R)MNDLGSLSIRRPVLTCEPK(K) | 2186.1420                       | 16.0205                    | 11.6                        | 65588.9/6.83    | HUMAN   | <a href="#">RQ8WWW8</a> | REVERSE GRB2-associated-binding protein 3 OS=Homo sapiens GN=GAB3 PE=2 SV=1                            |
| 4    | 5.57  | 60.9    | 2   | 15/25            | None           | (K)DSSKTIWKTVEEIDPRGK(V)  | 2202.1976                       | -0.0351                    | -15.9                       | 49823.6/5.06    | HUMAN   | <a href="#">Q723Y8</a>  | Keratin, type I cytoskeletal 27 OS=Homo sapiens GN=KRT27 PE=1 SV=1                                     |

Detailed Results

| Rank | Score | SPI (%) | BCS | # Unmatched Ions | Variable sites | Sequence                                    | MH <sup>+</sup> Calculated (Da) | MH <sup>+</sup> Error (Da) | MH <sup>+</sup> Error (ppm) | Protein MW (Da) | Species | Accession #            | MS-Digest Index #      | Protein Name                                                                                           |
|------|-------|---------|-----|------------------|----------------|---------------------------------------------|---------------------------------|----------------------------|-----------------------------|-----------------|---------|------------------------|------------------------|--------------------------------------------------------------------------------------------------------|
| 1    | 12.23 | 76.4    | 8   | 10/25            | K829k          | (K)I D\ V I k Q A D Y V P S D Q D L L R (C) | 2088.0972                       | 114.0654                   | 10.2                        | 111025.1/4.91   | HUMAN   | <a href="#">Q5JWF2</a> | <a href="#">257093</a> | Guanine nucleotide-binding protein G(s) subunit alpha isoforms XLas OS=Homo sapiens GN=GNAS PE=1 SV=2  |
| 1    | 12.23 | 76.4    | 8   | 10/25            | K186k          | (K)I D\ V I k Q A D Y V P S D Q D L L R (C) | 2088.0972                       | 114.0654                   | 10.2                        | 45664.8/5.59    | HUMAN   | <a href="#">P63092</a> | <a href="#">257101</a> | Guanine nucleotide-binding protein G(s) subunit alpha isoforms short OS=Homo sapiens GN=GNAS PE=1 SV=1 |

  

| Fragment-ion (m/z)      | 70.064 | 72.080 | 84.079 | 86.095 | 136.078 | 229.119 | 328.180 | 441.265 | 472.246 <sup>+2</sup> | 478.183 <sup>+2</sup> | 508.243 | 550.301 | 620.816 <sup>+2</sup> | 644.381 | 658.851 <sup>+2</sup> | 688.405 | 809.476 <sup>+2</sup> | 819.401 | 833.394 | 846.438 | 881.437 <sup>+2</sup> | 943.479 | 1014.519          | 1017.565 | 1160.607 |
|-------------------------|--------|--------|--------|--------|---------|---------|---------|---------|-----------------------|-----------------------|---------|---------|-----------------------|---------|-----------------------|---------|-----------------------|---------|---------|---------|-----------------------|---------|-------------------|----------|----------|
| Frac. Inten. (% of TIC) | 0.01   | 0.52   | 0.17   | 5.63   | 0.15    | 3.17    | 4.08    | 2.08    | 22.83                 | 2.19                  | 2.02    | 3.27    | 1.98                  | 2.46    | 1.93                  | 3.39    | 2.23                  | 2.67    | 1.98    | 2.44    | 3.40                  | 24.28   | 2.45              | 1.92     | 2.76     |
| Rel. Inten. (% of BP)   | 0.04   | 2.14   | 0.68   | 23.17  | 0.60    | 13.06   | 16.80   | 8.58    | 94.05                 | 9.03                  | 8.31    | 13.47   | 8.17                  | 10.14   | 7.93                  | 13.98   | 9.19                  | 11.01   | 8.14    | 10.07   | 14.01                 | 100.00  | 10.07             | 7.91     | 11.37    |
| Score                   | 0.20   | 0.50   | 0.50   | 1.00   | 0.75    | 0.75    | 0.50    | 1.50    | 1.50                  | -0.09                 | -0.08   | -0.13   | -0.08                 | 1.50    | -0.08                 | -0.14   | -0.09                 | -0.11   | -0.08   | 1.50    | 1.50                  | 1.50    | 0.50              | -0.08    | 0.50     |
| Ion-type                | PR     | V      | KQ     | a1     | Y       | b2      | b3      | b4      | ye <sup>+2</sup>      |                       |         |         | y5                    |         |                       |         |                       |         |         | y7      | y14 <sup>+2</sup>     | y8      | b <sup>++17</sup> | b9       |          |
| Delta ppm               | -14.6  | -9.4   | -25.9  | -27.0  | 0.50    | 19.2    | 0.1     | -24.1   | -16.4                 | 1.3                   |         |         | 12.9                  |         |                       |         |                       |         |         | 7.0     | -5.8                  | -5.7    | 0.5               |          | 9.3      |

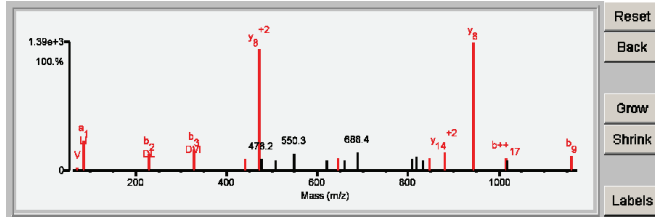

Result Summary

| Rank | Score | SPI (%) | BCS | # Unmatched Ions | Variable sites | Sequence                       | MH <sup>+</sup> Calculated (Da) | MH <sup>+</sup> Error (Da) | MH <sup>+</sup> Error (ppm) | Protein MW/pl (Da) | Species | Accession #            | Protein Name                                                                                           |
|------|-------|---------|-----|------------------|----------------|--------------------------------|---------------------------------|----------------------------|-----------------------------|--------------------|---------|------------------------|--------------------------------------------------------------------------------------------------------|
| 1    | 16.33 | 76.0    | 8   | 7/25             | K917k          | (R) <u>LQ</u> EALNLFKSIWNNR(W) | 1845.9970                       | 114.0581                   | 7.7                         | 111025.1/4.91      | HUMAN   | <a href="#">Q5JWF2</a> | Guanine nucleotide-binding protein G(s) subunit alpha isoforms XLas OS=Homo sapiens GN=GNAS PE=1 SV=2  |
| 1    | 16.33 | 76.0    | 8   | 7/25             | K274k          | (R) <u>LQ</u> EALNLFKSIWNNR(W) | 1845.9970                       | 114.0581                   | 7.7                         | 45664.8/5.59       | HUMAN   | <a href="#">P63092</a> | Guanine nucleotide-binding protein G(s) subunit alpha isoforms short OS=Homo sapiens GN=GNAS PE=1 SV=1 |

Detailed Results

| Rank | Score | SPI (%) | BCS | # Unmatched Ions | Variable sites | Sequence                       | MH <sup>+</sup> Calculated (Da) | MH <sup>+</sup> Error (Da) | MH <sup>+</sup> Error (ppm) | Protein MW/pl (Da) | Species | Accession #            | MS-Digest Index #      | Protein Name                                                                                           |
|------|-------|---------|-----|------------------|----------------|--------------------------------|---------------------------------|----------------------------|-----------------------------|--------------------|---------|------------------------|------------------------|--------------------------------------------------------------------------------------------------------|
| 1    | 16.33 | 76.0    | 8   | 7/25             | K917k          | (R) <u>LQ</u> EALNLFKSIWNNR(W) | 1845.9970                       | 114.0581                   | 7.7                         | 111025.1/4.91      | HUMAN   | <a href="#">Q5JWF2</a> | <a href="#">257093</a> | Guanine nucleotide-binding protein G(s) subunit alpha isoforms XLas OS=Homo sapiens GN=GNAS PE=1 SV=2  |
| 1    | 16.33 | 76.0    | 8   | 7/25             | K274k          | (R) <u>LQ</u> EALNLFKSIWNNR(W) | 1845.9970                       | 114.0581                   | 7.7                         | 45664.8/5.59       | HUMAN   | <a href="#">P63092</a> | <a href="#">257101</a> | Guanine nucleotide-binding protein G(s) subunit alpha isoforms short OS=Homo sapiens GN=GNAS PE=1 SV=1 |

| Fragment-ion (m/z)     | 84.079 | 86.096 | 87.058 | 120.079 | 131.116                         | 225.127        | 242.147 | 258.108                         | 272.136        | 289.166        | 325.184        | 397.215        | 403.195        | 452.236        | 572.326        | 589.282        | 610.296 <sup>+3</sup> | 696.381 <sup>+2</sup> | 702.351         | 758.395         | 782.441         | 789.385         | 859.948 <sup>+2</sup> | 1031.527        | 1178.621        |
|------------------------|--------|--------|--------|---------|---------------------------------|----------------|---------|---------------------------------|----------------|----------------|----------------|----------------|----------------|----------------|----------------|----------------|-----------------------|-----------------------|-----------------|-----------------|-----------------|-----------------|-----------------------|-----------------|-----------------|
| Frac. Inten.(% of TIC) | 0.17   | 23.93  | 0.07   | 0.14    | 10.24                           | 3.16           | 5.96    | 2.01                            | 1.69           | 2.86           | 1.73           | 1.86           | 2.09           | 1.69           | 1.99           | 6.09           | 2.27                  | 4.76                  | 3.27            | 1.77            | 3.34            | 8.44            | 3.92                  | 3.65            | 2.91            |
| Rel. Inten.(% of BP)   | 0.73   | 100.00 | 0.27   | 0.58    | 42.79                           | 13.21          | 24.90   | 8.38                            | 7.06           | 11.95          | 7.23           | 7.78           | 8.75           | 7.05           | 8.31           | 25.47          | 9.47                  | 19.89                 | 13.66           | 7.42            | 13.97           | 35.28           | 16.36                 | 15.25           | 12.15           |
| Score                  | 0.50   | 0.50   | 0.33   | 1.00    | -0.43                           | 0.25           | 0.50    | 0.75                            | 0.50           | 1.50           | -0.07          | -0.08          | 1.50           | -0.07          | -0.08          | 1.50           | 0.50                  | 0.50                  | 1.50            | -0.07           | 0.50            | 1.50            | 1.50                  | 1.50            | 1.50            |
| Ion-type               | KQ     | a1     | NR     | F       | b <sub>2</sub> -NH <sub>3</sub> | b <sub>2</sub> | QE      | y <sub>2</sub> -NH <sub>3</sub> | y <sub>2</sub> | y <sub>3</sub> | y <sub>4</sub> | y <sub>5</sub> | y <sub>6</sub> | y <sub>7</sub> | y <sub>8</sub> | y <sub>9</sub> | y <sub>10</sub>       | y <sub>11</sub>       | y <sub>12</sub> | y <sub>13</sub> | y <sub>14</sub> | y <sub>15</sub> | y <sub>16</sub>       | y <sub>17</sub> | y <sub>18</sub> |
| Delta ppm              | -24.7  | -10.8  | 35.7   | -17.3   |                                 | 15.2           | -14.1   | -2.9                            | 2.8            | 15.3           |                |                | -23.3          |                |                | -3.4           | -38.8                 |                       | -24.2           |                 | 0.0             | -18.9           | -4.4                  | -11.0           | 12.1            |
| LI                     |        | -10.8  |        |         |                                 |                |         |                                 |                |                |                |                |                |                |                |                |                       |                       |                 |                 |                 |                 |                       |                 |                 |

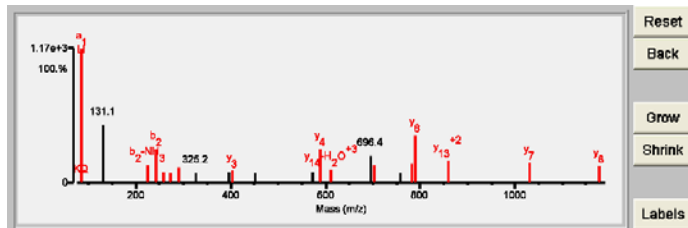



Result Summary

| Rank | Score | SPI (%) | BCS | # Unmatched Ions | Variable sites | Sequence           | MH <sup>+</sup> Calculated (Da) | MH <sup>+</sup> Error (Da) | MH <sup>+</sup> Error (ppm) | Protein MW (Da) | Species | Accession #            | Protein Name                                                                                           |
|------|-------|---------|-----|------------------|----------------|--------------------|---------------------------------|----------------------------|-----------------------------|-----------------|---------|------------------------|--------------------------------------------------------------------------------------------------------|
| 1    | 11.77 | 61.7    | 6   | 9/25             | K950k          | (K)SKIEDYFPEFAR(Y) | 1501.7322                       | 114.0630                   | 12.4                        | 111025.1/4.91   | HUMAN   | <a href="#">Q5JWF2</a> | Guanine nucleotide-binding protein G(s) subunit alpha isoforms XLas OS=Homo sapiens GN=GNAS PE=1 SV=2  |
| 1    | 11.77 | 61.7    | 6   | 9/25             | K307k          | (K)SKIEDYFPEFAR(Y) | 1501.7322                       | 114.0630                   | 12.4                        | 45664.8/5.59    | HUMAN   | <a href="#">P63092</a> | Guanine nucleotide-binding protein G(s) subunit alpha isoforms short OS=Homo sapiens GN=GNAS PE=1 SV=1 |

Detailed Results

| Rank | Score | SPI (%) | BCS | # Unmatched Ions | Variable sites | Sequence                         | MH <sup>+</sup> Calculated (Da) | MH <sup>+</sup> Error (Da) | MH <sup>+</sup> Error (ppm) | Protein MW (Da) | Species | Accession #            | MS-Digest Index #      | Protein Name                                                                                           |
|------|-------|---------|-----|------------------|----------------|----------------------------------|---------------------------------|----------------------------|-----------------------------|-----------------|---------|------------------------|------------------------|--------------------------------------------------------------------------------------------------------|
| 1    | 11.77 | 61.7    | 6   | 9/25             | K950k          | (K)S K I E D Y F P E F A / R (Y) | 1501.7322                       | 114.0630                   | 12.4                        | 111025.1/4.91   | HUMAN   | <a href="#">Q5JWF2</a> | <a href="#">257093</a> | Guanine nucleotide-binding protein G(s) subunit alpha isoforms XLas OS=Homo sapiens GN=GNAS PE=1 SV=2  |
| 1    | 11.77 | 61.7    | 6   | 9/25             | K307k          | (K)S K I E D Y F P E F A / R (Y) | 1501.7322                       | 114.0630                   | 12.4                        | 45664.8/5.59    | HUMAN   | <a href="#">P63092</a> | <a href="#">257101</a> | Guanine nucleotide-binding protein G(s) subunit alpha isoforms short OS=Homo sapiens GN=GNAS PE=1 SV=1 |

| Fragment-ion (m/z)      | 70.064 | 72.078 | 84.079 | 86.096 | 120.081 | 136.074 | 175.116 | 227.104 | 243.143 | 245.068 | 249.121 | 310.171 | 330.176 | 356.231 | 374.172 | 393.219 | 402.174 | 422.205 | 432.213 | 444.208 | 516.209 | 619.320 | 620.314 | 687.335 | 850.382 |
|-------------------------|--------|--------|--------|--------|---------|---------|---------|---------|---------|---------|---------|---------|---------|---------|---------|---------|---------|---------|---------|---------|---------|---------|---------|---------|---------|
| Frac. Inten. (% of TIC) | 0.01   | 3.43   | 11.77  | 0.26   | 0.85    | 0.33    | 4.65    | 4.04    | 2.56    | 2.79    | 2.75    | 3.30    | 3.50    | 3.39    | 3.12    | 5.03    | 3.52    | 3.22    | 2.58    | 4.78    | 2.74    | 20.11   | 3.50    | 3.11    | 4.65    |
| Rel. Inten. (% of BP)   | 0.05   | 17.07  | 58.52  | 1.29   | 4.25    | 1.62    | 23.13   | 20.07   | 12.71   | 13.87   | 13.67   | 16.42   | 17.38   | 16.87   | 15.50   | 25.03   | 17.50   | 15.99   | 12.80   | 23.78   | 13.63   | 100.00  | 17.40   | 15.48   | 23.13   |
| Score                   | 0.20   | -0.17  | -0.59  | 0.22   | 1.00    | 1.00    | 1.50    | 0.75    | 0.75    | 0.75    | -0.14   | 1.50    | 0.50    | 0.75    | 0.75    | 1.50    | -0.18   | -0.16   | -0.13   | -0.24   | -0.14   | 1.50    | -0.17   | 0.50    | 0.50    |
| Ion-type                | PR     |        |        | LI     | F       | Y       | y1      | PE      | IE      | ED      |         | y++5    | b2      | kl      | PEF     | y3      |         |         |         |         |         | y5      | b5      | b6      | b6      |
| Delta ppm               | -14.6  |        |        | -1.5   | -2.3    | -13.2   | -17.4   | 2.9     | 31.1    | -40.8   |         | 23.0    | -7.5    | 1.9     | -0.1    | -15.2   |         |         |         |         |         | -0.2    | 4.8     | 4.8     | -15.2   |

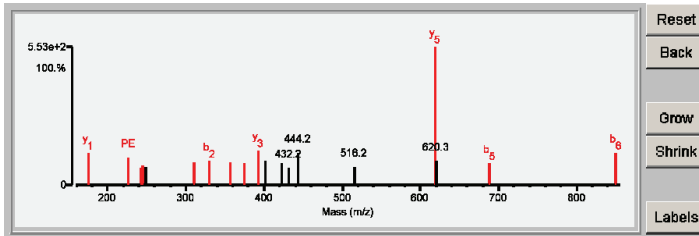

Result Summary

| Rank | Score | SPI (%) | BCS | # Unmatched Ions | Variable sites | Sequence            | MH <sup>+</sup> Calculated (Da) | MH <sup>+</sup> Error (Da) | MH <sup>+</sup> Error (ppm) | Protein MWipl (Da) | Species | Accession # | Protein Name                                                                                 |
|------|-------|---------|-----|------------------|----------------|---------------------|---------------------------------|----------------------------|-----------------------------|--------------------|---------|-------------|----------------------------------------------------------------------------------------------|
| 1    | 15.17 | 80.5    | 7   | 7/25             | K130k          | (K)TILWNTLGVCK(Y)   | 1432.7981                       | 114.0517                   | 5.6                         | 35076.9/7.60       | HUMAN   | P63244      | Guanine nucleotide-binding protein subunit beta-2-like 1 OS=Homo sapiens GN=GNB2L1 PE=1 SV=3 |
| 2    | 5.91  | 55.5    | 2   | 13/25            | None           | (K)TLIQPKGLSWFK(S)  | 1546.8628                       | -0.0130                    | -8.4                        | 312282.1/8.57      | HUMAN   | RQ9NR99     | REVERSE Matrix-remodeling-associated protein 5 OS=Homo sapiens GN=MXRA5 PE=2 SV=2            |
| 3    | 5.59  | 51.3    | 4   | 15/25            | None           | (R)VSASFGKHLTVCK(S) | 1546.8410                       | 0.0087                     | 5.6                         | 47685.0/5.36       | HUMAN   | RQ01344     | REVERSE Interleukin-5 receptor subunit alpha OS=Homo sapiens GN=IL5RA PE=1 SV=2              |

Detailed Results

| Rank | Score | SPI (%) | BCS | # Unmatched Ions | Variable sites | Sequence                      | MH <sup>+</sup> Calculated (Da) | MH <sup>+</sup> Error (Da) | MH <sup>+</sup> Error (ppm) | Protein MWipl (Da) | Species | Accession # | MS-Digest Index # | Protein Name                                                                                 |
|------|-------|---------|-----|------------------|----------------|-------------------------------|---------------------------------|----------------------------|-----------------------------|--------------------|---------|-------------|-------------------|----------------------------------------------------------------------------------------------|
| 1    | 15.17 | 80.5    | 7   | 7/25             | K130k          | (K) T I L W N T L G V C K (Y) | 1432.7981                       | 114.0517                   | 5.6                         | 35076.9/7.60       | HUMAN   | P63244      | 237111            | Guanine nucleotide-binding protein subunit beta-2-like 1 OS=Homo sapiens GN=GNB2L1 PE=1 SV=3 |

  

| Fragment-ion (m/z)     | 72.079 | 74.060 | 84.080 | 86.094 | 129.100 | 130.064 | 133.043 | 141.102 | 159.090 | 187.143 | 188.146 | 215.140 | 289.133 | 307.144 | 317.134 | 406.209 | 455.260 | 458.275 <sup>+2</sup> | 463.230 | 483.248 | 576.308 | 637.342 | 657.844 <sup>+2</sup> | 677.368 | 773.382 |
|------------------------|--------|--------|--------|--------|---------|---------|---------|---------|---------|---------|---------|---------|---------|---------|---------|---------|---------|-----------------------|---------|---------|---------|---------|-----------------------|---------|---------|
| Frac. Inten.(% of TIC) | 0.09   | 5.99   | 0.63   | 0.33   | 0.19    | 0.12    | 4.36    | 3.17    | 0.12    | 25.91   | 4.23    | 3.66    | 2.11    | 12.66   | 2.34    | 1.76    | 1.94    | 1.82                  | 13.86   | 2.02    | 4.09    | 1.94    | 2.45                  | 2.46    | 1.77    |
| Rel. Inten.(% of BP)   | 0.36   | 23.12  | 2.44   | 1.26   | 0.72    | 0.45    | 16.82   | 12.21   | 0.45    | 100.00  | 16.31   | 14.11   | 8.14    | 48.87   | 9.04    | 6.81    | 7.48    | 7.04                  | 53.50   | 7.80    | 15.77   | 7.47    | 9.45                  | 9.48    | 6.82    |
| Score                  | 0.50   | 1.50   | 0.50   | 0.22   | 0.20    |         | -0.17   | -0.12   | 2.00    | 0.50    | -0.16   | 0.75    | 0.50    | 1.50    | 0.75    | 1.50    | -0.07   | -0.07                 | 1.50    | -0.08   | 1.50    | -0.07   | 0.50                  | 1.50    | 0.50    |
| Ion-type               | V      | a1     | KQ     | LI     | RKQ     | W       |         |         | W       | a2      |         | b2      | GVC-28  | y2      | GVC     | y3      |         |                       | y4      |         | y5      |         | y10+H2O <sup>+2</sup> | y6      | y7-H2O  |
| Delta ppm              | -30.2  | -14.0  | -6.8   | -22.4  | -18.1   |         |         |         | -11.8   | -12.8   | -12.8   | -1.9    | -4.8    | 2.1     | 15.1    | -7.8    |         |                       | -6.3    |         | -15.4   |         | -14.0                 | 4.2     | -20.5   |

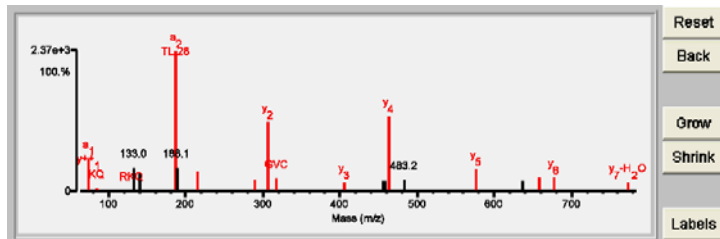

Result Summary

| Rank | Score | SPI (%) | BCS | # Unmatched ions | Variable sites | Sequence                    | MH <sup>+</sup> Calculated (Da) | MH <sup>+</sup> Error (Da) | MH <sup>+</sup> Error (ppm) | Protein MW/pi (Da) | Species | Accession # | Protein Name                                                                                 |
|------|-------|---------|-----|------------------|----------------|-----------------------------|---------------------------------|----------------------------|-----------------------------|--------------------|---------|-------------|----------------------------------------------------------------------------------------------|
| 1    | 23.03 | 93.9    | 7   | 2/25             | K175k          | (R)ESPNSNPIVSCGWDKLVK(V)    | 2248.1431                       | 114.0701                   | 11.5                        | 35076.9/7.60       | HUMAN   | P63244      | Guanine nucleotide-binding protein subunit beta-2-like 1 OS=Homo sapiens GN=GNB2L1 PE=1 SV=3 |
| 1    | 23.03 | 93.9    | 7   | 2/25             | K172k          | (R)ESPNSNPIVSCGWDKLVK(V)    | 2248.1431                       | 114.0701                   | 11.5                        | 35076.9/7.60       | HUMAN   | P63244      | Guanine nucleotide-binding protein subunit beta-2-like 1 OS=Homo sapiens GN=GNB2L1 PE=1 SV=3 |
| 2    | 9.78  | 63.2    | 2   | 13/25            | K29k K31k      | (K)FSEWkFKLFRVRSFEK(T)      | 2134.1696                       | 228.0535                   | -13.7                       | 119116.8/8.96      | HUMAN   | P15918      | V(D)J recombination-activating protein 1 OS=Homo sapiens GN=RAG1 PE=1 SV=1                   |
| 3    | 8.88  | 68.2    | 2   | 12/25            | K1373k         | (R)FSPGPEPSMIVFIHLNKYIR(K)  | 2248.1947                       | 114.0184                   | -10.4                       | 399896.9/6.52      | HUMAN   | RQ0VDD8     | REVERSE Dynein heavy chain 14, axonemal OS=Homo sapiens GN=DNAH14 PE=2 SV=3                  |
| 4    | 8.36  | 66.4    | 2   | 12/25            | K1064k         | (K)SFSKSDLVNWFKAHKRGPGSK(M) | 2248.1622                       | 114.0510                   | 3.4                         | 131572.3/4.89      | HUMAN   | O43847      | Nardilysin OS=Homo sapiens GN=NRD1 PE=1 SV=2                                                 |

Detailed Results

| Rank                                                                                                                                                                                                                                                                                                                                                                                                                                                                                                                                                                                                                                                                                                                                                                                                                                                                                                                                                                                                                                                                                                                                                                                                                                                                                                                                                                                                                                                                                                                                                                                                                                                                                                                                                                                                                                                                                                                                                                                                                                                                                                                                                                                                                                                                                                                                                                                                                                                                                                                                                                                                                                                                                                                                                                                                                                                                                                                                    | Score  | SPI (%) | BCS    | # Unmatched ions | Variable sites | Sequence                                     | MH <sup>+</sup> Calculated (Da) | MH <sup>+</sup> Error (Da) | MH <sup>+</sup> Error (ppm) | Protein MW/pi (Da) | Species               | Accession #           | MS-Digest Index #            | Protein Name                                                                                 |                                                 |                               |                               |                              |                  |                |                |                               |                |                |                 |                       |                       |         |                       |                       |                       |                       |                       |         |         |         |                        |          |          |          |                        |      |      |      |      |      |      |      |      |      |      |      |      |      |      |      |      |       |      |      |      |      |      |      |      |      |                      |      |      |      |      |      |      |      |      |      |      |      |      |      |      |      |      |        |      |      |      |      |       |      |       |      |       |      |      |      |      |      |      |      |      |      |      |      |       |     |      |      |      |      |      |       |      |      |      |      |      |      |      |          |    |   |    |    |                |                |    |                |     |     |                      |       |                              |                               |                                                 |                               |                               |                              |                  |                |                |                               |                |                |                 |           |      |      |       |       |       |       |      |     |      |       |     |  |     |      |       |     |     |      |      |       |  |      |      |      |      |
|-----------------------------------------------------------------------------------------------------------------------------------------------------------------------------------------------------------------------------------------------------------------------------------------------------------------------------------------------------------------------------------------------------------------------------------------------------------------------------------------------------------------------------------------------------------------------------------------------------------------------------------------------------------------------------------------------------------------------------------------------------------------------------------------------------------------------------------------------------------------------------------------------------------------------------------------------------------------------------------------------------------------------------------------------------------------------------------------------------------------------------------------------------------------------------------------------------------------------------------------------------------------------------------------------------------------------------------------------------------------------------------------------------------------------------------------------------------------------------------------------------------------------------------------------------------------------------------------------------------------------------------------------------------------------------------------------------------------------------------------------------------------------------------------------------------------------------------------------------------------------------------------------------------------------------------------------------------------------------------------------------------------------------------------------------------------------------------------------------------------------------------------------------------------------------------------------------------------------------------------------------------------------------------------------------------------------------------------------------------------------------------------------------------------------------------------------------------------------------------------------------------------------------------------------------------------------------------------------------------------------------------------------------------------------------------------------------------------------------------------------------------------------------------------------------------------------------------------------------------------------------------------------------------------------------------------|--------|---------|--------|------------------|----------------|----------------------------------------------|---------------------------------|----------------------------|-----------------------------|--------------------|-----------------------|-----------------------|------------------------------|----------------------------------------------------------------------------------------------|-------------------------------------------------|-------------------------------|-------------------------------|------------------------------|------------------|----------------|----------------|-------------------------------|----------------|----------------|-----------------|-----------------------|-----------------------|---------|-----------------------|-----------------------|-----------------------|-----------------------|-----------------------|---------|---------|---------|------------------------|----------|----------|----------|------------------------|------|------|------|------|------|------|------|------|------|------|------|------|------|------|------|------|-------|------|------|------|------|------|------|------|------|----------------------|------|------|------|------|------|------|------|------|------|------|------|------|------|------|------|------|--------|------|------|------|------|-------|------|-------|------|-------|------|------|------|------|------|------|------|------|------|------|------|-------|-----|------|------|------|------|------|-------|------|------|------|------|------|------|------|----------|----|---|----|----|----------------|----------------|----|----------------|-----|-----|----------------------|-------|------------------------------|-------------------------------|-------------------------------------------------|-------------------------------|-------------------------------|------------------------------|------------------|----------------|----------------|-------------------------------|----------------|----------------|-----------------|-----------|------|------|-------|-------|-------|-------|------|-----|------|-------|-----|--|-----|------|-------|-----|-----|------|------|-------|--|------|------|------|------|
| 1                                                                                                                                                                                                                                                                                                                                                                                                                                                                                                                                                                                                                                                                                                                                                                                                                                                                                                                                                                                                                                                                                                                                                                                                                                                                                                                                                                                                                                                                                                                                                                                                                                                                                                                                                                                                                                                                                                                                                                                                                                                                                                                                                                                                                                                                                                                                                                                                                                                                                                                                                                                                                                                                                                                                                                                                                                                                                                                                       | 23.03  | 93.9    | 7      | 2/25             | K175k          | (R)F S P N S N P I V S C / G W D K L V K (V) | 2248.1431                       | 114.0701                   | 11.5                        | 35076.9/7.60       | HUMAN                 | P63244                | 237111                       | Guanine nucleotide-binding protein subunit beta-2-like 1 OS=Homo sapiens GN=GNB2L1 PE=1 SV=3 |                                                 |                               |                               |                              |                  |                |                |                               |                |                |                 |                       |                       |         |                       |                       |                       |                       |                       |         |         |         |                        |          |          |          |                        |      |      |      |      |      |      |      |      |      |      |      |      |      |      |      |      |       |      |      |      |      |      |      |      |      |                      |      |      |      |      |      |      |      |      |      |      |      |      |      |      |      |      |        |      |      |      |      |       |      |       |      |       |      |      |      |      |      |      |      |      |      |      |      |       |     |      |      |      |      |      |       |      |      |      |      |      |      |      |          |    |   |    |    |                |                |    |                |     |     |                      |       |                              |                               |                                                 |                               |                               |                              |                  |                |                |                               |                |                |                 |           |      |      |       |       |       |       |      |     |      |       |     |  |     |      |       |     |     |      |      |       |  |      |      |      |      |
| <table border="1"> <thead> <tr> <th>Fragment-ion (m/z)</th> <th>70.065</th> <th>72.082</th> <th>84.080</th> <th>86.095</th> <th>120.080</th> <th>207.110</th> <th>212.110</th> <th>235.109</th> <th>299.135</th> <th>324.221</th> <th>355.678<sup>+2</sup></th> <th>412.223<sup>+2</sup></th> <th>500.214</th> <th>603.799<sup>+2</sup></th> <th>653.320<sup>+2</sup></th> <th>704.037<sup>+3</sup></th> <th>710.039<sup>+3</sup></th> <th>814.964<sup>+2</sup></th> <th>823.440</th> <th>958.995</th> <th>959.516</th> <th>1064.544<sup>+2</sup></th> <th>1119.557</th> <th>1206.591</th> <th>1305.682</th> </tr> </thead> <tbody> <tr> <td>Frac. Inten.(% of TIC)</td> <td>0.01</td> <td>0.06</td> <td>0.07</td> <td>0.24</td> <td>0.09</td> <td>3.13</td> <td>2.32</td> <td>2.18</td> <td>1.82</td> <td>2.24</td> <td>2.24</td> <td>3.17</td> <td>3.36</td> <td>2.73</td> <td>2.63</td> <td>3.83</td> <td>41.28</td> <td>2.48</td> <td>2.89</td> <td>2.33</td> <td>3.60</td> <td>7.78</td> <td>2.17</td> <td>4.38</td> <td>2.96</td> </tr> <tr> <td>Rel. Inten.(% of BP)</td> <td>0.01</td> <td>0.15</td> <td>0.17</td> <td>0.59</td> <td>0.23</td> <td>7.59</td> <td>5.62</td> <td>5.27</td> <td>4.41</td> <td>5.43</td> <td>5.43</td> <td>7.68</td> <td>8.15</td> <td>6.60</td> <td>6.36</td> <td>9.29</td> <td>100.00</td> <td>6.01</td> <td>7.00</td> <td>5.65</td> <td>8.72</td> <td>18.84</td> <td>5.27</td> <td>10.60</td> <td>7.17</td> </tr> <tr> <td>Score</td> <td>0.20</td> <td>0.50</td> <td>0.50</td> <td>0.22</td> <td>1.00</td> <td>0.50</td> <td>0.75</td> <td>0.50</td> <td>0.75</td> <td>0.75</td> <td>0.75</td> <td>-0.08</td> <td>6.3</td> <td>1.50</td> <td>1.50</td> <td>0.50</td> <td>1.50</td> <td>1.50</td> <td>-0.07</td> <td>1.50</td> <td>1.50</td> <td>1.50</td> <td>1.50</td> <td>1.50</td> <td>1.50</td> <td>1.50</td> </tr> <tr> <td>Ion-type</td> <td>PR</td> <td>V</td> <td>KQ</td> <td>LI</td> <td>a<sub>1</sub></td> <td>a<sub>2</sub></td> <td>NP</td> <td>b<sub>2</sub></td> <td>SNP</td> <td>PII</td> <td>PNSSNP<sup>+2</sup></td> <td>NSSNP</td> <td>y<sub>9</sub><sup>+2</sup></td> <td>y<sub>10</sub><sup>+2</sup></td> <td>y<sub>18</sub>+H<sub>2</sub>O<sup>+3</sup></td> <td>y<sub>18</sub><sup>+3</sup></td> <td>y<sub>13</sub><sup>+2</sup></td> <td>y<sub>1</sub><sup>+2</sup></td> <td>y<sup>+16</sup></td> <td>y<sub>7</sub></td> <td>y<sub>7</sub></td> <td>y<sub>18</sub><sup>+2</sup></td> <td>y<sub>8</sub></td> <td>y<sub>9</sub></td> <td>y<sub>10</sub></td> </tr> <tr> <td>Delta ppm</td> <td>-1.8</td> <td>10.0</td> <td>-12.8</td> <td>-14.2</td> <td>-18.9</td> <td>-20.8</td> <td>25.6</td> <td>1.6</td> <td>-2.7</td> <td>-24.0</td> <td>0.6</td> <td></td> <td>6.3</td> <td>-3.0</td> <td>-21.8</td> <td>9.5</td> <td>8.4</td> <td>23.2</td> <td>-4.0</td> <td>-15.5</td> <td></td> <td>-2.7</td> <td>-3.9</td> <td>-2.4</td> <td>15.3</td> </tr> </tbody> </table> |        |         |        |                  |                |                                              |                                 |                            |                             |                    |                       |                       |                              |                                                                                              | Fragment-ion (m/z)                              | 70.065                        | 72.082                        | 84.080                       | 86.095           | 120.080        | 207.110        | 212.110                       | 235.109        | 299.135        | 324.221         | 355.678 <sup>+2</sup> | 412.223 <sup>+2</sup> | 500.214 | 603.799 <sup>+2</sup> | 653.320 <sup>+2</sup> | 704.037 <sup>+3</sup> | 710.039 <sup>+3</sup> | 814.964 <sup>+2</sup> | 823.440 | 958.995 | 959.516 | 1064.544 <sup>+2</sup> | 1119.557 | 1206.591 | 1305.682 | Frac. Inten.(% of TIC) | 0.01 | 0.06 | 0.07 | 0.24 | 0.09 | 3.13 | 2.32 | 2.18 | 1.82 | 2.24 | 2.24 | 3.17 | 3.36 | 2.73 | 2.63 | 3.83 | 41.28 | 2.48 | 2.89 | 2.33 | 3.60 | 7.78 | 2.17 | 4.38 | 2.96 | Rel. Inten.(% of BP) | 0.01 | 0.15 | 0.17 | 0.59 | 0.23 | 7.59 | 5.62 | 5.27 | 4.41 | 5.43 | 5.43 | 7.68 | 8.15 | 6.60 | 6.36 | 9.29 | 100.00 | 6.01 | 7.00 | 5.65 | 8.72 | 18.84 | 5.27 | 10.60 | 7.17 | Score | 0.20 | 0.50 | 0.50 | 0.22 | 1.00 | 0.50 | 0.75 | 0.50 | 0.75 | 0.75 | 0.75 | -0.08 | 6.3 | 1.50 | 1.50 | 0.50 | 1.50 | 1.50 | -0.07 | 1.50 | 1.50 | 1.50 | 1.50 | 1.50 | 1.50 | 1.50 | Ion-type | PR | V | KQ | LI | a <sub>1</sub> | a <sub>2</sub> | NP | b <sub>2</sub> | SNP | PII | PNSSNP <sup>+2</sup> | NSSNP | y <sub>9</sub> <sup>+2</sup> | y <sub>10</sub> <sup>+2</sup> | y <sub>18</sub> +H <sub>2</sub> O <sup>+3</sup> | y <sub>18</sub> <sup>+3</sup> | y <sub>13</sub> <sup>+2</sup> | y <sub>1</sub> <sup>+2</sup> | y <sup>+16</sup> | y <sub>7</sub> | y <sub>7</sub> | y <sub>18</sub> <sup>+2</sup> | y <sub>8</sub> | y <sub>9</sub> | y <sub>10</sub> | Delta ppm | -1.8 | 10.0 | -12.8 | -14.2 | -18.9 | -20.8 | 25.6 | 1.6 | -2.7 | -24.0 | 0.6 |  | 6.3 | -3.0 | -21.8 | 9.5 | 8.4 | 23.2 | -4.0 | -15.5 |  | -2.7 | -3.9 | -2.4 | 15.3 |
| Fragment-ion (m/z)                                                                                                                                                                                                                                                                                                                                                                                                                                                                                                                                                                                                                                                                                                                                                                                                                                                                                                                                                                                                                                                                                                                                                                                                                                                                                                                                                                                                                                                                                                                                                                                                                                                                                                                                                                                                                                                                                                                                                                                                                                                                                                                                                                                                                                                                                                                                                                                                                                                                                                                                                                                                                                                                                                                                                                                                                                                                                                                      | 70.065 | 72.082  | 84.080 | 86.095           | 120.080        | 207.110                                      | 212.110                         | 235.109                    | 299.135                     | 324.221            | 355.678 <sup>+2</sup> | 412.223 <sup>+2</sup> | 500.214                      | 603.799 <sup>+2</sup>                                                                        | 653.320 <sup>+2</sup>                           | 704.037 <sup>+3</sup>         | 710.039 <sup>+3</sup>         | 814.964 <sup>+2</sup>        | 823.440          | 958.995        | 959.516        | 1064.544 <sup>+2</sup>        | 1119.557       | 1206.591       | 1305.682        |                       |                       |         |                       |                       |                       |                       |                       |         |         |         |                        |          |          |          |                        |      |      |      |      |      |      |      |      |      |      |      |      |      |      |      |      |       |      |      |      |      |      |      |      |      |                      |      |      |      |      |      |      |      |      |      |      |      |      |      |      |      |      |        |      |      |      |      |       |      |       |      |       |      |      |      |      |      |      |      |      |      |      |      |       |     |      |      |      |      |      |       |      |      |      |      |      |      |      |          |    |   |    |    |                |                |    |                |     |     |                      |       |                              |                               |                                                 |                               |                               |                              |                  |                |                |                               |                |                |                 |           |      |      |       |       |       |       |      |     |      |       |     |  |     |      |       |     |     |      |      |       |  |      |      |      |      |
| Frac. Inten.(% of TIC)                                                                                                                                                                                                                                                                                                                                                                                                                                                                                                                                                                                                                                                                                                                                                                                                                                                                                                                                                                                                                                                                                                                                                                                                                                                                                                                                                                                                                                                                                                                                                                                                                                                                                                                                                                                                                                                                                                                                                                                                                                                                                                                                                                                                                                                                                                                                                                                                                                                                                                                                                                                                                                                                                                                                                                                                                                                                                                                  | 0.01   | 0.06    | 0.07   | 0.24             | 0.09           | 3.13                                         | 2.32                            | 2.18                       | 1.82                        | 2.24               | 2.24                  | 3.17                  | 3.36                         | 2.73                                                                                         | 2.63                                            | 3.83                          | 41.28                         | 2.48                         | 2.89             | 2.33           | 3.60           | 7.78                          | 2.17           | 4.38           | 2.96            |                       |                       |         |                       |                       |                       |                       |                       |         |         |         |                        |          |          |          |                        |      |      |      |      |      |      |      |      |      |      |      |      |      |      |      |      |       |      |      |      |      |      |      |      |      |                      |      |      |      |      |      |      |      |      |      |      |      |      |      |      |      |      |        |      |      |      |      |       |      |       |      |       |      |      |      |      |      |      |      |      |      |      |      |       |     |      |      |      |      |      |       |      |      |      |      |      |      |      |          |    |   |    |    |                |                |    |                |     |     |                      |       |                              |                               |                                                 |                               |                               |                              |                  |                |                |                               |                |                |                 |           |      |      |       |       |       |       |      |     |      |       |     |  |     |      |       |     |     |      |      |       |  |      |      |      |      |
| Rel. Inten.(% of BP)                                                                                                                                                                                                                                                                                                                                                                                                                                                                                                                                                                                                                                                                                                                                                                                                                                                                                                                                                                                                                                                                                                                                                                                                                                                                                                                                                                                                                                                                                                                                                                                                                                                                                                                                                                                                                                                                                                                                                                                                                                                                                                                                                                                                                                                                                                                                                                                                                                                                                                                                                                                                                                                                                                                                                                                                                                                                                                                    | 0.01   | 0.15    | 0.17   | 0.59             | 0.23           | 7.59                                         | 5.62                            | 5.27                       | 4.41                        | 5.43               | 5.43                  | 7.68                  | 8.15                         | 6.60                                                                                         | 6.36                                            | 9.29                          | 100.00                        | 6.01                         | 7.00             | 5.65           | 8.72           | 18.84                         | 5.27           | 10.60          | 7.17            |                       |                       |         |                       |                       |                       |                       |                       |         |         |         |                        |          |          |          |                        |      |      |      |      |      |      |      |      |      |      |      |      |      |      |      |      |       |      |      |      |      |      |      |      |      |                      |      |      |      |      |      |      |      |      |      |      |      |      |      |      |      |      |        |      |      |      |      |       |      |       |      |       |      |      |      |      |      |      |      |      |      |      |      |       |     |      |      |      |      |      |       |      |      |      |      |      |      |      |          |    |   |    |    |                |                |    |                |     |     |                      |       |                              |                               |                                                 |                               |                               |                              |                  |                |                |                               |                |                |                 |           |      |      |       |       |       |       |      |     |      |       |     |  |     |      |       |     |     |      |      |       |  |      |      |      |      |
| Score                                                                                                                                                                                                                                                                                                                                                                                                                                                                                                                                                                                                                                                                                                                                                                                                                                                                                                                                                                                                                                                                                                                                                                                                                                                                                                                                                                                                                                                                                                                                                                                                                                                                                                                                                                                                                                                                                                                                                                                                                                                                                                                                                                                                                                                                                                                                                                                                                                                                                                                                                                                                                                                                                                                                                                                                                                                                                                                                   | 0.20   | 0.50    | 0.50   | 0.22             | 1.00           | 0.50                                         | 0.75                            | 0.50                       | 0.75                        | 0.75               | 0.75                  | -0.08                 | 6.3                          | 1.50                                                                                         | 1.50                                            | 0.50                          | 1.50                          | 1.50                         | -0.07            | 1.50           | 1.50           | 1.50                          | 1.50           | 1.50           | 1.50            | 1.50                  |                       |         |                       |                       |                       |                       |                       |         |         |         |                        |          |          |          |                        |      |      |      |      |      |      |      |      |      |      |      |      |      |      |      |      |       |      |      |      |      |      |      |      |      |                      |      |      |      |      |      |      |      |      |      |      |      |      |      |      |      |      |        |      |      |      |      |       |      |       |      |       |      |      |      |      |      |      |      |      |      |      |      |       |     |      |      |      |      |      |       |      |      |      |      |      |      |      |          |    |   |    |    |                |                |    |                |     |     |                      |       |                              |                               |                                                 |                               |                               |                              |                  |                |                |                               |                |                |                 |           |      |      |       |       |       |       |      |     |      |       |     |  |     |      |       |     |     |      |      |       |  |      |      |      |      |
| Ion-type                                                                                                                                                                                                                                                                                                                                                                                                                                                                                                                                                                                                                                                                                                                                                                                                                                                                                                                                                                                                                                                                                                                                                                                                                                                                                                                                                                                                                                                                                                                                                                                                                                                                                                                                                                                                                                                                                                                                                                                                                                                                                                                                                                                                                                                                                                                                                                                                                                                                                                                                                                                                                                                                                                                                                                                                                                                                                                                                | PR     | V       | KQ     | LI               | a <sub>1</sub> | a <sub>2</sub>                               | NP                              | b <sub>2</sub>             | SNP                         | PII                | PNSSNP <sup>+2</sup>  | NSSNP                 | y <sub>9</sub> <sup>+2</sup> | y <sub>10</sub> <sup>+2</sup>                                                                | y <sub>18</sub> +H <sub>2</sub> O <sup>+3</sup> | y <sub>18</sub> <sup>+3</sup> | y <sub>13</sub> <sup>+2</sup> | y <sub>1</sub> <sup>+2</sup> | y <sup>+16</sup> | y <sub>7</sub> | y <sub>7</sub> | y <sub>18</sub> <sup>+2</sup> | y <sub>8</sub> | y <sub>9</sub> | y <sub>10</sub> |                       |                       |         |                       |                       |                       |                       |                       |         |         |         |                        |          |          |          |                        |      |      |      |      |      |      |      |      |      |      |      |      |      |      |      |      |       |      |      |      |      |      |      |      |      |                      |      |      |      |      |      |      |      |      |      |      |      |      |      |      |      |      |        |      |      |      |      |       |      |       |      |       |      |      |      |      |      |      |      |      |      |      |      |       |     |      |      |      |      |      |       |      |      |      |      |      |      |      |          |    |   |    |    |                |                |    |                |     |     |                      |       |                              |                               |                                                 |                               |                               |                              |                  |                |                |                               |                |                |                 |           |      |      |       |       |       |       |      |     |      |       |     |  |     |      |       |     |     |      |      |       |  |      |      |      |      |
| Delta ppm                                                                                                                                                                                                                                                                                                                                                                                                                                                                                                                                                                                                                                                                                                                                                                                                                                                                                                                                                                                                                                                                                                                                                                                                                                                                                                                                                                                                                                                                                                                                                                                                                                                                                                                                                                                                                                                                                                                                                                                                                                                                                                                                                                                                                                                                                                                                                                                                                                                                                                                                                                                                                                                                                                                                                                                                                                                                                                                               | -1.8   | 10.0    | -12.8  | -14.2            | -18.9          | -20.8                                        | 25.6                            | 1.6                        | -2.7                        | -24.0              | 0.6                   |                       | 6.3                          | -3.0                                                                                         | -21.8                                           | 9.5                           | 8.4                           | 23.2                         | -4.0             | -15.5          |                | -2.7                          | -3.9           | -2.4           | 15.3            |                       |                       |         |                       |                       |                       |                       |                       |         |         |         |                        |          |          |          |                        |      |      |      |      |      |      |      |      |      |      |      |      |      |      |      |      |       |      |      |      |      |      |      |      |      |                      |      |      |      |      |      |      |      |      |      |      |      |      |      |      |      |      |        |      |      |      |      |       |      |       |      |       |      |      |      |      |      |      |      |      |      |      |      |       |     |      |      |      |      |      |       |      |      |      |      |      |      |      |          |    |   |    |    |                |                |    |                |     |     |                      |       |                              |                               |                                                 |                               |                               |                              |                  |                |                |                               |                |                |                 |           |      |      |       |       |       |       |      |     |      |       |     |  |     |      |       |     |     |      |      |       |  |      |      |      |      |

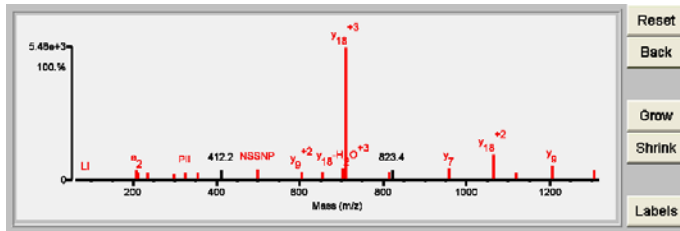

Result Summary

| Rank | Score | SPI (%) | BCS | # Unmatched Ions | Variable sites | Sequence          | MH <sup>+</sup> Calculated (Da) | MH <sup>+</sup> Error (Da) | MH <sup>+</sup> Error (ppm) | Protein MW/pI (Da) | Species | Accession # | Protein Name                                                                                 |
|------|-------|---------|-----|------------------|----------------|-------------------|---------------------------------|----------------------------|-----------------------------|--------------------|---------|-------------|----------------------------------------------------------------------------------------------|
| 1    | 17.36 | 87.8    | 8   | 5/25             | K175k          | (K)LVKVVNLANCK(L) | 1344.7457                       | 114.0679                   | 17.1                        | 35076.9/7.60       | HUMAN   | P63244      | Guanine nucleotide-binding protein subunit beta-2-like 1 OS=Homo sapiens GN=GNB2L1 PE=1 SV=3 |

Detailed Results

| Rank                                                                                                                                                                                                                                                                                                                                                                                                                                                                                                                                                                                                                                                                                                                                                                                                                                                                                                                                                                                                                                                                                                                                                                                                                                                                                                                                                                                                                                                                                                                                                                                                                                                                                                                                                                                                                                                                                                                                                                                                                                                                                                                                                                                                                                                                                                                                                                                                                                                    | Score  | SPI (%) | BCS    | # Unmatched Ions | Variable sites | Sequence          | MH <sup>+</sup> Calculated (Da) | MH <sup>+</sup> Error (Da) | MH <sup>+</sup> Error (ppm) | Protein MW/pI (Da) | Species | Accession # | MS-Digest Index # | Protein Name                                                                                 |                    |         |         |         |         |         |         |         |         |         |         |         |         |         |         |         |         |         |         |         |         |         |         |         |         |         |                         |      |      |      |      |       |      |      |      |      |      |      |      |      |      |      |      |      |      |      |      |      |       |      |      |      |                       |      |      |      |      |        |      |      |      |       |      |      |      |      |       |      |       |      |       |       |       |       |       |       |      |      |       |       |      |      |       |      |      |      |  |       |       |       |  |  |      |      |      |      |      |      |      |      |      |      |      |      |          |  |   |    |  |    |    |     |   |  |  |  |    |   |    |    |    |       |  |    |        |    |    |    |    |    |           |  |     |     |  |       |      |      |  |  |  |  |      |     |      |      |     |      |     |      |      |     |      |     |      |      |
|---------------------------------------------------------------------------------------------------------------------------------------------------------------------------------------------------------------------------------------------------------------------------------------------------------------------------------------------------------------------------------------------------------------------------------------------------------------------------------------------------------------------------------------------------------------------------------------------------------------------------------------------------------------------------------------------------------------------------------------------------------------------------------------------------------------------------------------------------------------------------------------------------------------------------------------------------------------------------------------------------------------------------------------------------------------------------------------------------------------------------------------------------------------------------------------------------------------------------------------------------------------------------------------------------------------------------------------------------------------------------------------------------------------------------------------------------------------------------------------------------------------------------------------------------------------------------------------------------------------------------------------------------------------------------------------------------------------------------------------------------------------------------------------------------------------------------------------------------------------------------------------------------------------------------------------------------------------------------------------------------------------------------------------------------------------------------------------------------------------------------------------------------------------------------------------------------------------------------------------------------------------------------------------------------------------------------------------------------------------------------------------------------------------------------------------------------------|--------|---------|--------|------------------|----------------|-------------------|---------------------------------|----------------------------|-----------------------------|--------------------|---------|-------------|-------------------|----------------------------------------------------------------------------------------------|--------------------|---------|---------|---------|---------|---------|---------|---------|---------|---------|---------|---------|---------|---------|---------|---------|---------|---------|---------|---------|---------|---------|---------|---------|---------|---------|-------------------------|------|------|------|------|-------|------|------|------|------|------|------|------|------|------|------|------|------|------|------|------|------|-------|------|------|------|-----------------------|------|------|------|------|--------|------|------|------|-------|------|------|------|------|-------|------|-------|------|-------|-------|-------|-------|-------|-------|------|------|-------|-------|------|------|-------|------|------|------|--|-------|-------|-------|--|--|------|------|------|------|------|------|------|------|------|------|------|------|----------|--|---|----|--|----|----|-----|---|--|--|--|----|---|----|----|----|-------|--|----|--------|----|----|----|----|----|-----------|--|-----|-----|--|-------|------|------|--|--|--|--|------|-----|------|------|-----|------|-----|------|------|-----|------|-----|------|------|
| 1                                                                                                                                                                                                                                                                                                                                                                                                                                                                                                                                                                                                                                                                                                                                                                                                                                                                                                                                                                                                                                                                                                                                                                                                                                                                                                                                                                                                                                                                                                                                                                                                                                                                                                                                                                                                                                                                                                                                                                                                                                                                                                                                                                                                                                                                                                                                                                                                                                                       | 17.36  | 87.8    | 8      | 5/25             | K175k          | (K)LVKVVNLANCK(L) | 1344.7457                       | 114.0679                   | 17.1                        | 35076.9/7.60       | HUMAN   | P63244      | 237111            | Guanine nucleotide-binding protein subunit beta-2-like 1 OS=Homo sapiens GN=GNB2L1 PE=1 SV=3 |                    |         |         |         |         |         |         |         |         |         |         |         |         |         |         |         |         |         |         |         |         |         |         |         |         |         |                         |      |      |      |      |       |      |      |      |      |      |      |      |      |      |      |      |      |      |      |      |      |       |      |      |      |                       |      |      |      |      |        |      |      |      |       |      |      |      |      |       |      |       |      |       |       |       |       |       |       |      |      |       |       |      |      |       |      |      |      |  |       |       |       |  |  |      |      |      |      |      |      |      |      |      |      |      |      |          |  |   |    |  |    |    |     |   |  |  |  |    |   |    |    |    |       |  |    |        |    |    |    |    |    |           |  |     |     |  |       |      |      |  |  |  |  |      |     |      |      |     |      |     |      |      |     |      |     |      |      |
| <table border="1"> <thead> <tr> <th>Fragment-ion (m/z)</th> <th>70.064</th> <th>72.081</th> <th>84.082</th> <th>85.084</th> <th>86.097</th> <th>87.055</th> <th>129.101</th> <th>130.070</th> <th>132.078</th> <th>133.045</th> <th>141.102</th> <th>147.113</th> <th>159.093</th> <th>185.165</th> <th>213.160</th> <th>307.146</th> <th>314.219</th> <th>342.215</th> <th>404.166</th> <th>421.192</th> <th>455.300</th> <th>492.232</th> <th>605.308</th> <th>623.831</th> <th>719.361</th> </tr> </thead> <tbody> <tr> <td>Frac. Inten. (% of TIC)</td> <td>0.06</td> <td>0.29</td> <td>0.70</td> <td>2.25</td> <td>28.58</td> <td>0.07</td> <td>0.18</td> <td>0.19</td> <td>4.38</td> <td>2.74</td> <td>2.75</td> <td>1.93</td> <td>0.22</td> <td>8.40</td> <td>2.42</td> <td>8.09</td> <td>2.65</td> <td>3.90</td> <td>3.06</td> <td>4.90</td> <td>3.36</td> <td>11.14</td> <td>3.91</td> <td>1.82</td> <td>2.01</td> </tr> <tr> <td>Rel. Inten. (% of BP)</td> <td>0.21</td> <td>1.02</td> <td>2.46</td> <td>7.87</td> <td>100.00</td> <td>0.25</td> <td>0.84</td> <td>0.67</td> <td>15.31</td> <td>9.59</td> <td>9.61</td> <td>6.76</td> <td>0.78</td> <td>29.40</td> <td>8.48</td> <td>23.31</td> <td>9.29</td> <td>13.65</td> <td>10.70</td> <td>17.14</td> <td>11.75</td> <td>38.97</td> <td>13.87</td> <td>6.36</td> <td>7.03</td> </tr> <tr> <td>Score</td> <td>-0.00</td> <td>0.50</td> <td>0.50</td> <td>-0.08</td> <td>0.50</td> <td>0.33</td> <td>0.20</td> <td></td> <td>-0.15</td> <td>-0.10</td> <td>-0.10</td> <td></td> <td></td> <td>1.50</td> <td>2.00</td> <td>0.50</td> <td>0.50</td> <td>1.50</td> <td>0.75</td> <td>0.50</td> <td>1.50</td> <td>1.50</td> <td>1.50</td> <td>1.50</td> <td>1.50</td> </tr> <tr> <td>Ion-type</td> <td></td> <td>V</td> <td>KQ</td> <td></td> <td>a1</td> <td>NR</td> <td>RKQ</td> <td>W</td> <td></td> <td></td> <td></td> <td>y1</td> <td>W</td> <td>a2</td> <td>b2</td> <td>y2</td> <td>KV-28</td> <td></td> <td>KV</td> <td>y3-NH3</td> <td>y3</td> <td>b3</td> <td>y4</td> <td>y5</td> <td>y6</td> </tr> <tr> <td>Delta ppm</td> <td></td> <td>3.1</td> <td>8.6</td> <td></td> <td>-10.7</td> <td>-1.0</td> <td>-9.6</td> <td></td> <td></td> <td></td> <td></td> <td>-2.1</td> <td>9.6</td> <td>-3.4</td> <td>-6.3</td> <td>8.6</td> <td>-1.2</td> <td>0.4</td> <td>15.3</td> <td>12.6</td> <td>2.5</td> <td>16.7</td> <td>1.1</td> <td>14.1</td> <td>14.2</td> </tr> </tbody> </table> |        |         |        |                  |                |                   |                                 |                            |                             |                    |         |             |                   |                                                                                              | Fragment-ion (m/z) | 70.064  | 72.081  | 84.082  | 85.084  | 86.097  | 87.055  | 129.101 | 130.070 | 132.078 | 133.045 | 141.102 | 147.113 | 159.093 | 185.165 | 213.160 | 307.146 | 314.219 | 342.215 | 404.166 | 421.192 | 455.300 | 492.232 | 605.308 | 623.831 | 719.361 | Frac. Inten. (% of TIC) | 0.06 | 0.29 | 0.70 | 2.25 | 28.58 | 0.07 | 0.18 | 0.19 | 4.38 | 2.74 | 2.75 | 1.93 | 0.22 | 8.40 | 2.42 | 8.09 | 2.65 | 3.90 | 3.06 | 4.90 | 3.36 | 11.14 | 3.91 | 1.82 | 2.01 | Rel. Inten. (% of BP) | 0.21 | 1.02 | 2.46 | 7.87 | 100.00 | 0.25 | 0.84 | 0.67 | 15.31 | 9.59 | 9.61 | 6.76 | 0.78 | 29.40 | 8.48 | 23.31 | 9.29 | 13.65 | 10.70 | 17.14 | 11.75 | 38.97 | 13.87 | 6.36 | 7.03 | Score | -0.00 | 0.50 | 0.50 | -0.08 | 0.50 | 0.33 | 0.20 |  | -0.15 | -0.10 | -0.10 |  |  | 1.50 | 2.00 | 0.50 | 0.50 | 1.50 | 0.75 | 0.50 | 1.50 | 1.50 | 1.50 | 1.50 | 1.50 | Ion-type |  | V | KQ |  | a1 | NR | RKQ | W |  |  |  | y1 | W | a2 | b2 | y2 | KV-28 |  | KV | y3-NH3 | y3 | b3 | y4 | y5 | y6 | Delta ppm |  | 3.1 | 8.6 |  | -10.7 | -1.0 | -9.6 |  |  |  |  | -2.1 | 9.6 | -3.4 | -6.3 | 8.6 | -1.2 | 0.4 | 15.3 | 12.6 | 2.5 | 16.7 | 1.1 | 14.1 | 14.2 |
| Fragment-ion (m/z)                                                                                                                                                                                                                                                                                                                                                                                                                                                                                                                                                                                                                                                                                                                                                                                                                                                                                                                                                                                                                                                                                                                                                                                                                                                                                                                                                                                                                                                                                                                                                                                                                                                                                                                                                                                                                                                                                                                                                                                                                                                                                                                                                                                                                                                                                                                                                                                                                                      | 70.064 | 72.081  | 84.082 | 85.084           | 86.097         | 87.055            | 129.101                         | 130.070                    | 132.078                     | 133.045            | 141.102 | 147.113     | 159.093           | 185.165                                                                                      | 213.160            | 307.146 | 314.219 | 342.215 | 404.166 | 421.192 | 455.300 | 492.232 | 605.308 | 623.831 | 719.361 |         |         |         |         |         |         |         |         |         |         |         |         |         |         |         |                         |      |      |      |      |       |      |      |      |      |      |      |      |      |      |      |      |      |      |      |      |      |       |      |      |      |                       |      |      |      |      |        |      |      |      |       |      |      |      |      |       |      |       |      |       |       |       |       |       |       |      |      |       |       |      |      |       |      |      |      |  |       |       |       |  |  |      |      |      |      |      |      |      |      |      |      |      |      |          |  |   |    |  |    |    |     |   |  |  |  |    |   |    |    |    |       |  |    |        |    |    |    |    |    |           |  |     |     |  |       |      |      |  |  |  |  |      |     |      |      |     |      |     |      |      |     |      |     |      |      |
| Frac. Inten. (% of TIC)                                                                                                                                                                                                                                                                                                                                                                                                                                                                                                                                                                                                                                                                                                                                                                                                                                                                                                                                                                                                                                                                                                                                                                                                                                                                                                                                                                                                                                                                                                                                                                                                                                                                                                                                                                                                                                                                                                                                                                                                                                                                                                                                                                                                                                                                                                                                                                                                                                 | 0.06   | 0.29    | 0.70   | 2.25             | 28.58          | 0.07              | 0.18                            | 0.19                       | 4.38                        | 2.74               | 2.75    | 1.93        | 0.22              | 8.40                                                                                         | 2.42               | 8.09    | 2.65    | 3.90    | 3.06    | 4.90    | 3.36    | 11.14   | 3.91    | 1.82    | 2.01    |         |         |         |         |         |         |         |         |         |         |         |         |         |         |         |                         |      |      |      |      |       |      |      |      |      |      |      |      |      |      |      |      |      |      |      |      |      |       |      |      |      |                       |      |      |      |      |        |      |      |      |       |      |      |      |      |       |      |       |      |       |       |       |       |       |       |      |      |       |       |      |      |       |      |      |      |  |       |       |       |  |  |      |      |      |      |      |      |      |      |      |      |      |      |          |  |   |    |  |    |    |     |   |  |  |  |    |   |    |    |    |       |  |    |        |    |    |    |    |    |           |  |     |     |  |       |      |      |  |  |  |  |      |     |      |      |     |      |     |      |      |     |      |     |      |      |
| Rel. Inten. (% of BP)                                                                                                                                                                                                                                                                                                                                                                                                                                                                                                                                                                                                                                                                                                                                                                                                                                                                                                                                                                                                                                                                                                                                                                                                                                                                                                                                                                                                                                                                                                                                                                                                                                                                                                                                                                                                                                                                                                                                                                                                                                                                                                                                                                                                                                                                                                                                                                                                                                   | 0.21   | 1.02    | 2.46   | 7.87             | 100.00         | 0.25              | 0.84                            | 0.67                       | 15.31                       | 9.59               | 9.61    | 6.76        | 0.78              | 29.40                                                                                        | 8.48               | 23.31   | 9.29    | 13.65   | 10.70   | 17.14   | 11.75   | 38.97   | 13.87   | 6.36    | 7.03    |         |         |         |         |         |         |         |         |         |         |         |         |         |         |         |                         |      |      |      |      |       |      |      |      |      |      |      |      |      |      |      |      |      |      |      |      |      |       |      |      |      |                       |      |      |      |      |        |      |      |      |       |      |      |      |      |       |      |       |      |       |       |       |       |       |       |      |      |       |       |      |      |       |      |      |      |  |       |       |       |  |  |      |      |      |      |      |      |      |      |      |      |      |      |          |  |   |    |  |    |    |     |   |  |  |  |    |   |    |    |    |       |  |    |        |    |    |    |    |    |           |  |     |     |  |       |      |      |  |  |  |  |      |     |      |      |     |      |     |      |      |     |      |     |      |      |
| Score                                                                                                                                                                                                                                                                                                                                                                                                                                                                                                                                                                                                                                                                                                                                                                                                                                                                                                                                                                                                                                                                                                                                                                                                                                                                                                                                                                                                                                                                                                                                                                                                                                                                                                                                                                                                                                                                                                                                                                                                                                                                                                                                                                                                                                                                                                                                                                                                                                                   | -0.00  | 0.50    | 0.50   | -0.08            | 0.50           | 0.33              | 0.20                            |                            | -0.15                       | -0.10              | -0.10   |             |                   | 1.50                                                                                         | 2.00               | 0.50    | 0.50    | 1.50    | 0.75    | 0.50    | 1.50    | 1.50    | 1.50    | 1.50    | 1.50    |         |         |         |         |         |         |         |         |         |         |         |         |         |         |         |                         |      |      |      |      |       |      |      |      |      |      |      |      |      |      |      |      |      |      |      |      |      |       |      |      |      |                       |      |      |      |      |        |      |      |      |       |      |      |      |      |       |      |       |      |       |       |       |       |       |       |      |      |       |       |      |      |       |      |      |      |  |       |       |       |  |  |      |      |      |      |      |      |      |      |      |      |      |      |          |  |   |    |  |    |    |     |   |  |  |  |    |   |    |    |    |       |  |    |        |    |    |    |    |    |           |  |     |     |  |       |      |      |  |  |  |  |      |     |      |      |     |      |     |      |      |     |      |     |      |      |
| Ion-type                                                                                                                                                                                                                                                                                                                                                                                                                                                                                                                                                                                                                                                                                                                                                                                                                                                                                                                                                                                                                                                                                                                                                                                                                                                                                                                                                                                                                                                                                                                                                                                                                                                                                                                                                                                                                                                                                                                                                                                                                                                                                                                                                                                                                                                                                                                                                                                                                                                |        | V       | KQ     |                  | a1             | NR                | RKQ                             | W                          |                             |                    |         | y1          | W                 | a2                                                                                           | b2                 | y2      | KV-28   |         | KV      | y3-NH3  | y3      | b3      | y4      | y5      | y6      |         |         |         |         |         |         |         |         |         |         |         |         |         |         |         |                         |      |      |      |      |       |      |      |      |      |      |      |      |      |      |      |      |      |      |      |      |      |       |      |      |      |                       |      |      |      |      |        |      |      |      |       |      |      |      |      |       |      |       |      |       |       |       |       |       |       |      |      |       |       |      |      |       |      |      |      |  |       |       |       |  |  |      |      |      |      |      |      |      |      |      |      |      |      |          |  |   |    |  |    |    |     |   |  |  |  |    |   |    |    |    |       |  |    |        |    |    |    |    |    |           |  |     |     |  |       |      |      |  |  |  |  |      |     |      |      |     |      |     |      |      |     |      |     |      |      |
| Delta ppm                                                                                                                                                                                                                                                                                                                                                                                                                                                                                                                                                                                                                                                                                                                                                                                                                                                                                                                                                                                                                                                                                                                                                                                                                                                                                                                                                                                                                                                                                                                                                                                                                                                                                                                                                                                                                                                                                                                                                                                                                                                                                                                                                                                                                                                                                                                                                                                                                                               |        | 3.1     | 8.6    |                  | -10.7          | -1.0              | -9.6                            |                            |                             |                    |         | -2.1        | 9.6               | -3.4                                                                                         | -6.3               | 8.6     | -1.2    | 0.4     | 15.3    | 12.6    | 2.5     | 16.7    | 1.1     | 14.1    | 14.2    |         |         |         |         |         |         |         |         |         |         |         |         |         |         |         |                         |      |      |      |      |       |      |      |      |      |      |      |      |      |      |      |      |      |      |      |      |      |       |      |      |      |                       |      |      |      |      |        |      |      |      |       |      |      |      |      |       |      |       |      |       |       |       |       |       |       |      |      |       |       |      |      |       |      |      |      |  |       |       |       |  |  |      |      |      |      |      |      |      |      |      |      |      |      |          |  |   |    |  |    |    |     |   |  |  |  |    |   |    |    |    |       |  |    |        |    |    |    |    |    |           |  |     |     |  |       |      |      |  |  |  |  |      |     |      |      |     |      |     |      |      |     |      |     |      |      |

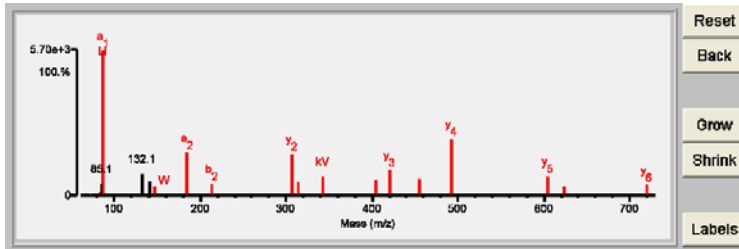

Reset  
Back  
Grow  
Shrink  
Labels

Result Summary

| Rank | Score | SPI (%) | BCS | # Unmatched Ions | Variable sites | Sequence                                                          | MH <sup>+</sup> Calculated (Da) | MH <sup>+</sup> Error (Da) | MH <sup>+</sup> Error (ppm) | Protein MW/pi (Da) | Species | Accession # | Protein Name                                                                                 |
|------|-------|---------|-----|------------------|----------------|-------------------------------------------------------------------|---------------------------------|----------------------------|-----------------------------|--------------------|---------|-------------|----------------------------------------------------------------------------------------------|
| 1    | 18.40 | 89.1    | 12  | 2/25             | K185k          | (K) L K T N H I G H T G Y L N T V T V S P D G S L C A S G G K (D) | 2984.4894                       | 114.0774                   | 11.1                        | 35076.9/7.60       | HUMAN   | P63244      | Guanine nucleotide-binding protein subunit beta-2-like 1 OS=Homo sapiens GN=GNB2L1 PE=1 SV=3 |

Detailed Results

| Rank                    | Score | SPI (%) | BCS    | # Unmatched Ions | Variable sites | Sequence                                                          | MH <sup>+</sup> Calculated (Da) | MH <sup>+</sup> Error (Da) | MH <sup>+</sup> Error (ppm) | Protein MW/pi (Da) | Species        | Accession #    | MS-Digest Index #             | Protein Name                                                                                 |                       |                  |                                                 |                               |                               |                                                 |                               |                       |                  |                |                  |                 |
|-------------------------|-------|---------|--------|------------------|----------------|-------------------------------------------------------------------|---------------------------------|----------------------------|-----------------------------|--------------------|----------------|----------------|-------------------------------|----------------------------------------------------------------------------------------------|-----------------------|------------------|-------------------------------------------------|-------------------------------|-------------------------------|-------------------------------------------------|-------------------------------|-----------------------|------------------|----------------|------------------|-----------------|
| 1                       | 18.40 | 89.1    | 12     | 2/25             | K185k          | (K) L K T N H I G H T G Y L N T V T V S P D G S L C A S G G K (D) | 2984.4894                       | 114.0774                   | 11.1                        | 35076.9/7.60       | HUMAN          | P63244         | 237111                        | Guanine nucleotide-binding protein subunit beta-2-like 1 OS=Homo sapiens GN=GNB2L1 PE=1 SV=3 |                       |                  |                                                 |                               |                               |                                                 |                               |                       |                  |                |                  |                 |
| Fragment-ion (m/z)      |       | 70.064  | 72.079 | 74.060           | 84.081         | 86.095                                                            | 110.072                         | 129.103                    | 136.077                     | 173.125            | 261.155        | 348.181        | 419.220                       | 524.742 <sup>+2</sup>                                                                        | 549.606 <sup>+3</sup> | 579.261          | 668.843                                         | 716.364 <sup>+2</sup>         | 725.381 <sup>+2</sup>         | 782.405 <sup>+2</sup>                           | 823.924 <sup>+2</sup>         | 832.940 <sup>+2</sup> | 836.396          | 882.468        | 923.971          | 1048.463        |
| Frac. Inten. (% of TIC) |       | 0.01    | 0.45   | 5.56             | 0.24           | 14.50                                                             | 0.08                            | 0.12                       | 0.08                        | 7.43               | 2.43           | 3.43           | 5.23                          | 5.91                                                                                         | 2.88                  | 7.02             | 4.52                                            | 2.44                          | 5.30                          | 6.43                                            | 6.58                          | 4.89                  | 4.48             | 2.39           | 3.45             | 4.13            |
| Rel. Inten. (% of BP)   |       | 0.04    | 3.10   | 38.33            | 1.63           | 100.00                                                            | 0.55                            | 0.82                       | 0.55                        | 51.25              | 16.77          | 23.65          | 36.08                         | 40.73                                                                                        | 19.88                 | 48.44            | 31.16                                           | 16.82                         | 36.57                         | 44.33                                           | 45.40                         | 33.73                 | 30.90            | 16.50          | 23.82            | 28.45           |
| Score                   |       | 0.20    | 0.50   | 1.50             | 0.50           | 1.00                                                              | 1.00                            | 0.20                       | 1.00                        | 0.51               | 1.50           | 1.50           | 1.50                          | 1.50                                                                                         | 0.25                  | 1.50             | 0.50                                            | 0.25                          | 0.50                          | 0.50                                            | 0.25                          | 0.50                  | 1.50             | 0.50           | -0.24            | 1.50            |
| Ion-type                |       | FR      | V      | y <sup>+++</sup> | KQ             | a1                                                                | H                               | RKQ                        | Y                           | y <sub>3</sub>     | y <sub>4</sub> | y <sub>5</sub> | y <sub>11</sub> <sup>+2</sup> | b <sub>14</sub> -H <sub>2</sub> O <sup>+3</sup>                                              | y <sub>6</sub>        | b <sup>+++</sup> | b <sub>12</sub> -H <sub>2</sub> O <sup>+2</sup> | b <sub>12</sub> <sup>+2</sup> | b <sub>13</sub> <sup>+2</sup> | b <sub>14</sub> -H <sub>2</sub> O <sup>+2</sup> | b <sub>14</sub> <sup>+2</sup> | y <sub>6</sub>        | b <sup>+++</sup> | y <sub>6</sub> | b <sup>+++</sup> | y <sub>11</sub> |
| Delta ppm               |       | -14.6   | -17.7  | -5.9             | -2.1           | -32.8                                                             | 3.0                             | 5.9                        | 11.8                        | -4.3               | -19.1          | -12.3          | 4.5                           | -19.6                                                                                        | 9.8                   | 0.9              | -21.2                                           | -3.7                          | -0.3                          | 0.0                                             | 12.3                          | 3.9                   | 5.1              | -9.5           |                  |                 |

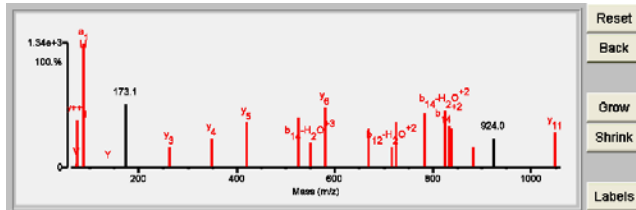

Result Summary

| Rank | Score | SPI (%) | BCS | # Unmatched Ions | Variable sites | Sequence                 | MH <sup>+</sup> Calculated (Da) | MH <sup>+</sup> Error (Da) | MH <sup>+</sup> Error (ppm) | Protein MW/pI (Da) | Species | Accession # | Protein Name                                                                                 |
|------|-------|---------|-----|------------------|----------------|--------------------------|---------------------------------|----------------------------|-----------------------------|--------------------|---------|-------------|----------------------------------------------------------------------------------------------|
| 1    | 24.95 | 89.9    | 11  | 3/25             | K257k          | (R)YWLCAATGPSIKWDLEK(I)  | 2208.1158                       | 114.0522                   | 4.0                         | 35076.9/7.60       | HUMAN   | P63244      | Guanine nucleotide-binding protein subunit beta-2-like 1 OS=Homo sapiens GN=GNB2L1 PE=1 SV=3 |
| 2    | 18.39 | 79.2    | 7   | 7/25             | K264k          | (R)YWLCAATGPSIKWDLEK(I)  | 2208.1158                       | 114.0522                   | 4.0                         | 35076.9/7.60       | HUMAN   | P63244      | Guanine nucleotide-binding protein subunit beta-2-like 1 OS=Homo sapiens GN=GNB2L1 PE=1 SV=3 |
| 3    | 6.43  | 62.8    | 2   | 14/25            | M2102m         | (R)LMAMFPLKGNLEEWYSAK(N) | 2306.1923                       | 15.9756                    | -8.3                        | 290491.5/8.27      | HUMAN   | RQ99973     | REVERSE Telomerase protein component 1 OS=Homo sapiens GN=TEP1 PE=1 SV=2                     |

Detailed Results

| Rank                    | Score | SPI (%) | BCS  | # Unmatched Ions | Variable sites | Sequence                | MH <sup>+</sup> Calculated (Da) | MH <sup>+</sup> Error (Da) | MH <sup>+</sup> Error (ppm) | Protein MW/pI (Da) | Species | Accession #      | MS-Digest Index # | Protein Name                                                                                 |                   |                       |                                    |                   |                       |                       |                   |                   |                   |                       |                       |                   |
|-------------------------|-------|---------|------|------------------|----------------|-------------------------|---------------------------------|----------------------------|-----------------------------|--------------------|---------|------------------|-------------------|----------------------------------------------------------------------------------------------|-------------------|-----------------------|------------------------------------|-------------------|-----------------------|-----------------------|-------------------|-------------------|-------------------|-----------------------|-----------------------|-------------------|
| 1                       | 24.95 | 89.9    | 11   | 3/25             | K257k          | (R)YWLCAATGPSIKWDLEK(I) | 2208.1158                       | 114.0522                   | 4.0                         | 35076.9/7.60       | HUMAN   | P63244           | 237111            | Guanine nucleotide-binding protein subunit beta-2-like 1 OS=Homo sapiens GN=GNB2L1 PE=1 SV=3 |                   |                       |                                    |                   |                       |                       |                   |                   |                   |                       |                       |                   |
| Frac. Inten. (% of TIC) |       | 0.08    | 0.16 | 0.17             | 0.06           | 1.92                    | 6.00                            | 2.89                       | 2.00                        | 10.06              | 2.13    | 13.12            | 2.39              | 551.811 <sup>+2</sup>                                                                        | 561.288           | 700.385 <sup>+2</sup> | 728.902 <sup>+2</sup>              | 747.365           | 779.425 <sup>+2</sup> | 814.931 <sup>+2</sup> | 848.398           | 850.943           | 860.460           | 930.470 <sup>+2</sup> | 987.004 <sup>+2</sup> | 1102.580          |
| Rel. Inten. (% of BP)   |       | 0.39    | 0.84 | 0.87             | 0.29           | 9.97                    | 31.18                           | 15.03                      | 10.38                       | 52.29              | 11.06   | 68.19            | 12.41             | 9.40                                                                                         | 9.56              | 16.37                 | 10.82                              | 20.12             | 16.07                 | 13.90                 | 15.70             | 11.14             | 11.08             | 57.87                 | 100.00                | 14.73             |
| Score                   |       | 0.50    | 0.22 | 1.00             | 2.00           | -0.10                   | -0.31                           | 1.50                       | 0.75                        | 0.50               | 0.75    | 0.50             | 0.50              | 1.50                                                                                         | 1.50              | 1.50                  | 1.50                               | 1.50              | 1.50                  | 1.50                  | 0.25              | -0.11             | 1.50              | 1.50                  | 1.50                  | 1.50              |
| Ion-type                |       | KQ      | LI   | a1               | W              | y                       | CAA                             | 82                         | LCA                         | b2                 | b3      | y8 <sup>+2</sup> | y5                | y11 <sup>+2</sup>                                                                            | y12 <sup>+2</sup> | y6                    | b13-H <sub>2</sub> O <sup>+2</sup> | y14 <sup>+2</sup> | b7-H <sub>2</sub> O   | y7                    | y16 <sup>+2</sup> | y17 <sup>+2</sup> | y18 <sup>+2</sup> | y19 <sup>+2</sup>     | y20 <sup>+2</sup>     | y21 <sup>+2</sup> |
| Delta ppm               |       | -15.2   | -6.1 | -23.4            | -12.4          |                         | -1.3                            | -5.1                       | -11.2                       | -18.3              | -4.9    | -14.2            |                   | 22.7                                                                                         | 0.8               | 3.0                   | 12.3                               | -3.6              | 33.9                  | -6.3                  | 24.7              | 10.5              | 0.7               | -7.6                  | -8.1                  |                   |
|                         |       |         |      | 1.00             | 1.00           |                         |                                 |                            |                             |                    |         |                  |                   |                                                                                              |                   |                       |                                    |                   |                       |                       |                   |                   |                   |                       |                       |                   |
|                         |       |         |      | Y                | Y              |                         |                                 |                            |                             |                    |         |                  |                   |                                                                                              |                   |                       |                                    |                   |                       |                       |                   |                   |                   |                       |                       |                   |
|                         |       |         |      | -15.4            |                |                         |                                 |                            |                             |                    |         |                  |                   |                                                                                              |                   |                       |                                    |                   |                       |                       |                   |                   |                   |                       |                       |                   |

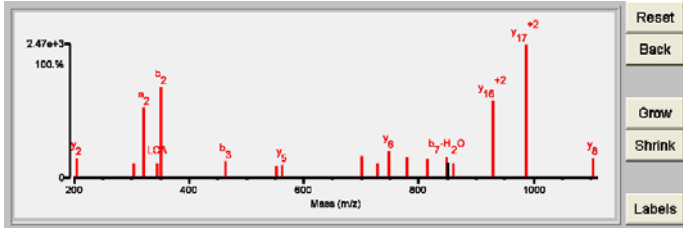

Result Summary

| Rank | Score | SPI (%) | BCS | # Unmatched Ions | Variable sites | Sequence                 | MH <sup>+</sup> Calculated (Da) | MH <sup>+</sup> Error (Da) | MH <sup>+</sup> Error (ppm) | Protein MW/pl (Da) | Species | Accession # | Protein Name                                                                                   |
|------|-------|---------|-----|------------------|----------------|--------------------------|---------------------------------|----------------------------|-----------------------------|--------------------|---------|-------------|------------------------------------------------------------------------------------------------|
| 1    | 22.88 | 92.6    | 11  | 4/25             | K271k          | (K)IIVDELKQEVISTSSK(A)   | 1788.9953                       | 114.0483                   | 2.8                         | 35076.9/7.60       | HUMAN   | P63244      | Guanine nucleotide-binding protein subunit beta-2-like 1 OS=Homo sapiens GN=GNB2L1 PE=1 SV=3   |
| 2    | 13.86 | 77.2    | 6   | 10/25            | K280k          | (K)IIVDELKQEVISTSSK(A)   | 1788.9953                       | 114.0483                   | 2.8                         | 35076.9/7.60       | HUMAN   | P63244      | Guanine nucleotide-binding protein subunit beta-2-like 1 OS=Homo sapiens GN=GNB2L1 PE=1 SV=3   |
| 3    | 7.46  | 69.3    | 3   | 14/25            | None           | (R)IIDEVVKFLDGLGNAK(S)   | 1903.0171                       | 0.0265                     | 13.9                        | 23772.1/6.25       | HUMAN   | O95816      | BAG family molecular chaperone regulator 2 OS=Homo sapiens GN=BAG2 PE=1 SV=1                   |
| 4    | 7.44  | 68.9    | 3   | 14/25            | K36k           | (R)LLQELVEDKTRWMK(W)     | 1788.9677                       | 114.0760                   | 17.4                        | 142507.9/6.73      | HUMAN   | Q9C0C7      | Activating molecule in BECN1-regulated autophagy protein 1 OS=Homo sapiens GN=AMBRA1 PE=1 SV=2 |
| 5    | 6.62  | 72.5    | 3   | 14/25            | None           | (R)LIIVQVQEGESVLYTLQR(L) | 1903.0647                       | -0.0211                    | -11.1                       | 446704.2/6.12      | HUMAN   | RQ8TC29     | REVERSE Fibrocystin OS=Homo sapiens GN=PKHD1 PE=1 SV=1                                         |

Detailed Results

| Rank                                                                                                                                                                                                                                                                                                                                                                                                                                                                                                                                                                                                                                                                                                                                                                                                                                                                                                                                                                                                                                                                                                                                                                                                                                                                                                                                                                                                                                                                                                                                                                                                                                                                                                                                                                                                                                                                                                                                                                                                                                                                                                                                                                                                                                                                                                                                                                                                                                                                                                                                                                                                                                                                                                                                                                                                  | Score  | SPI (%) | BCS            | # Unmatched Ions | Variable sites | Sequence                               | MH <sup>+</sup> Calculated (Da) | MH <sup>+</sup> Error (Da) | MH <sup>+</sup> Error (ppm) | Protein MW/pl (Da) | Species           | Accession # | MS-Digest Index #              | Protein Name                                                                                 |                    |           |                                |           |                                |                                                  |                                |                |                                |                |                 |         |         |           |         |         |           |           |           |           |           |           |         |           |         |          |                         |      |      |       |       |      |      |      |      |      |      |      |      |      |      |      |      |      |      |      |      |       |      |      |      |      |                       |      |      |       |       |      |       |      |      |       |      |      |      |       |      |      |       |      |       |       |       |        |       |       |       |      |       |      |      |      |      |       |      |      |      |      |      |      |       |      |      |      |       |      |       |      |      |      |      |      |      |      |          |   |    |                |                |  |                |                |     |                |                |                   |  |                                |       |                |  |                                |  |                                |                                                  |                                |                |                                |                |                 |           |     |     |      |      |  |      |     |     |     |  |      |  |     |      |      |  |     |  |      |     |      |      |     |      |      |
|-------------------------------------------------------------------------------------------------------------------------------------------------------------------------------------------------------------------------------------------------------------------------------------------------------------------------------------------------------------------------------------------------------------------------------------------------------------------------------------------------------------------------------------------------------------------------------------------------------------------------------------------------------------------------------------------------------------------------------------------------------------------------------------------------------------------------------------------------------------------------------------------------------------------------------------------------------------------------------------------------------------------------------------------------------------------------------------------------------------------------------------------------------------------------------------------------------------------------------------------------------------------------------------------------------------------------------------------------------------------------------------------------------------------------------------------------------------------------------------------------------------------------------------------------------------------------------------------------------------------------------------------------------------------------------------------------------------------------------------------------------------------------------------------------------------------------------------------------------------------------------------------------------------------------------------------------------------------------------------------------------------------------------------------------------------------------------------------------------------------------------------------------------------------------------------------------------------------------------------------------------------------------------------------------------------------------------------------------------------------------------------------------------------------------------------------------------------------------------------------------------------------------------------------------------------------------------------------------------------------------------------------------------------------------------------------------------------------------------------------------------------------------------------------------------|--------|---------|----------------|------------------|----------------|----------------------------------------|---------------------------------|----------------------------|-----------------------------|--------------------|-------------------|-------------|--------------------------------|----------------------------------------------------------------------------------------------|--------------------|-----------|--------------------------------|-----------|--------------------------------|--------------------------------------------------|--------------------------------|----------------|--------------------------------|----------------|-----------------|---------|---------|-----------|---------|---------|-----------|-----------|-----------|-----------|-----------|-----------|---------|-----------|---------|----------|-------------------------|------|------|-------|-------|------|------|------|------|------|------|------|------|------|------|------|------|------|------|------|------|-------|------|------|------|------|-----------------------|------|------|-------|-------|------|-------|------|------|-------|------|------|------|-------|------|------|-------|------|-------|-------|-------|--------|-------|-------|-------|------|-------|------|------|------|------|-------|------|------|------|------|------|------|-------|------|------|------|-------|------|-------|------|------|------|------|------|------|------|----------|---|----|----------------|----------------|--|----------------|----------------|-----|----------------|----------------|-------------------|--|--------------------------------|-------|----------------|--|--------------------------------|--|--------------------------------|--------------------------------------------------|--------------------------------|----------------|--------------------------------|----------------|-----------------|-----------|-----|-----|------|------|--|------|-----|-----|-----|--|------|--|-----|------|------|--|-----|--|------|-----|------|------|-----|------|------|
| 1                                                                                                                                                                                                                                                                                                                                                                                                                                                                                                                                                                                                                                                                                                                                                                                                                                                                                                                                                                                                                                                                                                                                                                                                                                                                                                                                                                                                                                                                                                                                                                                                                                                                                                                                                                                                                                                                                                                                                                                                                                                                                                                                                                                                                                                                                                                                                                                                                                                                                                                                                                                                                                                                                                                                                                                                     | 22.88  | 92.6    | 11             | 4/25             | K271k          | (K)I I V D E L K Q E V I S T S S K (A) | 1788.9953                       | 114.0483                   | 2.8                         | 35076.9/7.60       | HUMAN             | P63244      | 237111                         | Guanine nucleotide-binding protein subunit beta-2-like 1 OS=Homo sapiens GN=GNB2L1 PE=1 SV=3 |                    |           |                                |           |                                |                                                  |                                |                |                                |                |                 |         |         |           |         |         |           |           |           |           |           |           |         |           |         |          |                         |      |      |       |       |      |      |      |      |      |      |      |      |      |      |      |      |      |      |      |      |       |      |      |      |      |                       |      |      |       |       |      |       |      |      |       |      |      |      |       |      |      |       |      |       |       |       |        |       |       |       |      |       |      |      |      |      |       |      |      |      |      |      |      |       |      |      |      |       |      |       |      |      |      |      |      |      |      |          |   |    |                |                |  |                |                |     |                |                |                   |  |                                |       |                |  |                                |  |                                |                                                  |                                |                |                                |                |                 |           |     |     |      |      |  |      |     |     |     |  |      |  |     |      |      |  |     |  |      |     |      |      |     |      |      |
| <table border="1"> <thead> <tr> <th>Fragment-ion (m/z)</th> <th>72.081</th> <th>84.081</th> <th>86.097</th> <th>199.181</th> <th>200.184</th> <th>227.176</th> <th>321.180</th> <th>344.147</th> <th>509.257</th> <th>570.311</th> <th>610.828</th> <th>611.328</th> <th>667.373*2</th> <th>699.368</th> <th>721.406</th> <th>722.413*2</th> <th>731.891*2</th> <th>781.909*2</th> <th>789.400*2</th> <th>829.936*2</th> <th>838.937*2</th> <th>850.451</th> <th>895.485*2</th> <th>978.506</th> <th>1220.638</th> </tr> </thead> <tbody> <tr> <td>Frac. Inten. (% of TIC)</td> <td>0.05</td> <td>0.05</td> <td>16.01</td> <td>15.89</td> <td>1.95</td> <td>7.10</td> <td>1.46</td> <td>1.52</td> <td>5.09</td> <td>1.13</td> <td>1.49</td> <td>1.19</td> <td>2.34</td> <td>1.20</td> <td>1.80</td> <td>2.23</td> <td>1.73</td> <td>2.04</td> <td>3.59</td> <td>2.65</td> <td>19.91</td> <td>2.73</td> <td>2.69</td> <td>3.11</td> <td>1.06</td> </tr> <tr> <td>Rel. Inten. (% of BP)</td> <td>0.25</td> <td>0.24</td> <td>80.38</td> <td>79.78</td> <td>9.79</td> <td>35.68</td> <td>7.33</td> <td>7.64</td> <td>25.58</td> <td>5.68</td> <td>7.50</td> <td>5.97</td> <td>11.75</td> <td>6.00</td> <td>9.04</td> <td>11.18</td> <td>8.69</td> <td>10.25</td> <td>18.05</td> <td>13.30</td> <td>100.00</td> <td>13.70</td> <td>13.51</td> <td>15.61</td> <td>5.30</td> </tr> <tr> <td>Score</td> <td>0.50</td> <td>0.50</td> <td>0.50</td> <td>0.50</td> <td>-0.10</td> <td>0.50</td> <td>1.50</td> <td>0.75</td> <td>1.50</td> <td>0.75</td> <td>1.50</td> <td>-0.06</td> <td>1.50</td> <td>1.50</td> <td>1.50</td> <td>-0.11</td> <td>1.50</td> <td>-0.10</td> <td>1.50</td> <td>0.50</td> <td>1.50</td> <td>1.50</td> <td>1.50</td> <td>1.50</td> <td>1.50</td> </tr> <tr> <td>Ion-type</td> <td>V</td> <td>KQ</td> <td>a<sub>1</sub></td> <td>a<sub>2</sub></td> <td></td> <td>b<sub>2</sub></td> <td>y<sub>3</sub></td> <td>VDE</td> <td>y<sub>5</sub></td> <td>b<sub>5</sub></td> <td>y<sup>++10</sup></td> <td></td> <td>y<sub>11</sub><sup>++2</sup></td> <td>VDELK</td> <td>y<sub>7</sub></td> <td></td> <td>y<sub>12</sub><sup>++2</sup></td> <td></td> <td>y<sub>13</sub><sup>++2</sup></td> <td>y<sub>14</sub>+H<sub>2</sub>O<sup>++2</sup></td> <td>y<sub>14</sub><sup>++2</sup></td> <td>y<sub>6</sub></td> <td>y<sub>15</sub><sup>++2</sup></td> <td>y<sub>9</sub></td> <td>y<sub>10</sub></td> </tr> <tr> <td>Delta ppm</td> <td>8.7</td> <td>7.4</td> <td>-8.4</td> <td>-3.4</td> <td></td> <td>-1.8</td> <td>8.5</td> <td>2.8</td> <td>0.7</td> <td></td> <td>-5.8</td> <td></td> <td>4.3</td> <td>-0.3</td> <td>-4.4</td> <td></td> <td>0.5</td> <td></td> <td>-5.4</td> <td>1.7</td> <td>-1.9</td> <td>-1.2</td> <td>4.4</td> <td>-4.0</td> <td>-8.3</td> </tr> </tbody> </table> |        |         |                |                  |                |                                        |                                 |                            |                             |                    |                   |             |                                |                                                                                              | Fragment-ion (m/z) | 72.081    | 84.081                         | 86.097    | 199.181                        | 200.184                                          | 227.176                        | 321.180        | 344.147                        | 509.257        | 570.311         | 610.828 | 611.328 | 667.373*2 | 699.368 | 721.406 | 722.413*2 | 731.891*2 | 781.909*2 | 789.400*2 | 829.936*2 | 838.937*2 | 850.451 | 895.485*2 | 978.506 | 1220.638 | Frac. Inten. (% of TIC) | 0.05 | 0.05 | 16.01 | 15.89 | 1.95 | 7.10 | 1.46 | 1.52 | 5.09 | 1.13 | 1.49 | 1.19 | 2.34 | 1.20 | 1.80 | 2.23 | 1.73 | 2.04 | 3.59 | 2.65 | 19.91 | 2.73 | 2.69 | 3.11 | 1.06 | Rel. Inten. (% of BP) | 0.25 | 0.24 | 80.38 | 79.78 | 9.79 | 35.68 | 7.33 | 7.64 | 25.58 | 5.68 | 7.50 | 5.97 | 11.75 | 6.00 | 9.04 | 11.18 | 8.69 | 10.25 | 18.05 | 13.30 | 100.00 | 13.70 | 13.51 | 15.61 | 5.30 | Score | 0.50 | 0.50 | 0.50 | 0.50 | -0.10 | 0.50 | 1.50 | 0.75 | 1.50 | 0.75 | 1.50 | -0.06 | 1.50 | 1.50 | 1.50 | -0.11 | 1.50 | -0.10 | 1.50 | 0.50 | 1.50 | 1.50 | 1.50 | 1.50 | 1.50 | Ion-type | V | KQ | a <sub>1</sub> | a <sub>2</sub> |  | b <sub>2</sub> | y <sub>3</sub> | VDE | y <sub>5</sub> | b <sub>5</sub> | y <sup>++10</sup> |  | y <sub>11</sub> <sup>++2</sup> | VDELK | y <sub>7</sub> |  | y <sub>12</sub> <sup>++2</sup> |  | y <sub>13</sub> <sup>++2</sup> | y <sub>14</sub> +H <sub>2</sub> O <sup>++2</sup> | y <sub>14</sub> <sup>++2</sup> | y <sub>6</sub> | y <sub>15</sub> <sup>++2</sup> | y <sub>9</sub> | y <sub>10</sub> | Delta ppm | 8.7 | 7.4 | -8.4 | -3.4 |  | -1.8 | 8.5 | 2.8 | 0.7 |  | -5.8 |  | 4.3 | -0.3 | -4.4 |  | 0.5 |  | -5.4 | 1.7 | -1.9 | -1.2 | 4.4 | -4.0 | -8.3 |
| Fragment-ion (m/z)                                                                                                                                                                                                                                                                                                                                                                                                                                                                                                                                                                                                                                                                                                                                                                                                                                                                                                                                                                                                                                                                                                                                                                                                                                                                                                                                                                                                                                                                                                                                                                                                                                                                                                                                                                                                                                                                                                                                                                                                                                                                                                                                                                                                                                                                                                                                                                                                                                                                                                                                                                                                                                                                                                                                                                                    | 72.081 | 84.081  | 86.097         | 199.181          | 200.184        | 227.176                                | 321.180                         | 344.147                    | 509.257                     | 570.311            | 610.828           | 611.328     | 667.373*2                      | 699.368                                                                                      | 721.406            | 722.413*2 | 731.891*2                      | 781.909*2 | 789.400*2                      | 829.936*2                                        | 838.937*2                      | 850.451        | 895.485*2                      | 978.506        | 1220.638        |         |         |           |         |         |           |           |           |           |           |           |         |           |         |          |                         |      |      |       |       |      |      |      |      |      |      |      |      |      |      |      |      |      |      |      |      |       |      |      |      |      |                       |      |      |       |       |      |       |      |      |       |      |      |      |       |      |      |       |      |       |       |       |        |       |       |       |      |       |      |      |      |      |       |      |      |      |      |      |      |       |      |      |      |       |      |       |      |      |      |      |      |      |      |          |   |    |                |                |  |                |                |     |                |                |                   |  |                                |       |                |  |                                |  |                                |                                                  |                                |                |                                |                |                 |           |     |     |      |      |  |      |     |     |     |  |      |  |     |      |      |  |     |  |      |     |      |      |     |      |      |
| Frac. Inten. (% of TIC)                                                                                                                                                                                                                                                                                                                                                                                                                                                                                                                                                                                                                                                                                                                                                                                                                                                                                                                                                                                                                                                                                                                                                                                                                                                                                                                                                                                                                                                                                                                                                                                                                                                                                                                                                                                                                                                                                                                                                                                                                                                                                                                                                                                                                                                                                                                                                                                                                                                                                                                                                                                                                                                                                                                                                                               | 0.05   | 0.05    | 16.01          | 15.89            | 1.95           | 7.10                                   | 1.46                            | 1.52                       | 5.09                        | 1.13               | 1.49              | 1.19        | 2.34                           | 1.20                                                                                         | 1.80               | 2.23      | 1.73                           | 2.04      | 3.59                           | 2.65                                             | 19.91                          | 2.73           | 2.69                           | 3.11           | 1.06            |         |         |           |         |         |           |           |           |           |           |           |         |           |         |          |                         |      |      |       |       |      |      |      |      |      |      |      |      |      |      |      |      |      |      |      |      |       |      |      |      |      |                       |      |      |       |       |      |       |      |      |       |      |      |      |       |      |      |       |      |       |       |       |        |       |       |       |      |       |      |      |      |      |       |      |      |      |      |      |      |       |      |      |      |       |      |       |      |      |      |      |      |      |      |          |   |    |                |                |  |                |                |     |                |                |                   |  |                                |       |                |  |                                |  |                                |                                                  |                                |                |                                |                |                 |           |     |     |      |      |  |      |     |     |     |  |      |  |     |      |      |  |     |  |      |     |      |      |     |      |      |
| Rel. Inten. (% of BP)                                                                                                                                                                                                                                                                                                                                                                                                                                                                                                                                                                                                                                                                                                                                                                                                                                                                                                                                                                                                                                                                                                                                                                                                                                                                                                                                                                                                                                                                                                                                                                                                                                                                                                                                                                                                                                                                                                                                                                                                                                                                                                                                                                                                                                                                                                                                                                                                                                                                                                                                                                                                                                                                                                                                                                                 | 0.25   | 0.24    | 80.38          | 79.78            | 9.79           | 35.68                                  | 7.33                            | 7.64                       | 25.58                       | 5.68               | 7.50              | 5.97        | 11.75                          | 6.00                                                                                         | 9.04               | 11.18     | 8.69                           | 10.25     | 18.05                          | 13.30                                            | 100.00                         | 13.70          | 13.51                          | 15.61          | 5.30            |         |         |           |         |         |           |           |           |           |           |           |         |           |         |          |                         |      |      |       |       |      |      |      |      |      |      |      |      |      |      |      |      |      |      |      |      |       |      |      |      |      |                       |      |      |       |       |      |       |      |      |       |      |      |      |       |      |      |       |      |       |       |       |        |       |       |       |      |       |      |      |      |      |       |      |      |      |      |      |      |       |      |      |      |       |      |       |      |      |      |      |      |      |      |          |   |    |                |                |  |                |                |     |                |                |                   |  |                                |       |                |  |                                |  |                                |                                                  |                                |                |                                |                |                 |           |     |     |      |      |  |      |     |     |     |  |      |  |     |      |      |  |     |  |      |     |      |      |     |      |      |
| Score                                                                                                                                                                                                                                                                                                                                                                                                                                                                                                                                                                                                                                                                                                                                                                                                                                                                                                                                                                                                                                                                                                                                                                                                                                                                                                                                                                                                                                                                                                                                                                                                                                                                                                                                                                                                                                                                                                                                                                                                                                                                                                                                                                                                                                                                                                                                                                                                                                                                                                                                                                                                                                                                                                                                                                                                 | 0.50   | 0.50    | 0.50           | 0.50             | -0.10          | 0.50                                   | 1.50                            | 0.75                       | 1.50                        | 0.75               | 1.50              | -0.06       | 1.50                           | 1.50                                                                                         | 1.50               | -0.11     | 1.50                           | -0.10     | 1.50                           | 0.50                                             | 1.50                           | 1.50           | 1.50                           | 1.50           | 1.50            |         |         |           |         |         |           |           |           |           |           |           |         |           |         |          |                         |      |      |       |       |      |      |      |      |      |      |      |      |      |      |      |      |      |      |      |      |       |      |      |      |      |                       |      |      |       |       |      |       |      |      |       |      |      |      |       |      |      |       |      |       |       |       |        |       |       |       |      |       |      |      |      |      |       |      |      |      |      |      |      |       |      |      |      |       |      |       |      |      |      |      |      |      |      |          |   |    |                |                |  |                |                |     |                |                |                   |  |                                |       |                |  |                                |  |                                |                                                  |                                |                |                                |                |                 |           |     |     |      |      |  |      |     |     |     |  |      |  |     |      |      |  |     |  |      |     |      |      |     |      |      |
| Ion-type                                                                                                                                                                                                                                                                                                                                                                                                                                                                                                                                                                                                                                                                                                                                                                                                                                                                                                                                                                                                                                                                                                                                                                                                                                                                                                                                                                                                                                                                                                                                                                                                                                                                                                                                                                                                                                                                                                                                                                                                                                                                                                                                                                                                                                                                                                                                                                                                                                                                                                                                                                                                                                                                                                                                                                                              | V      | KQ      | a <sub>1</sub> | a <sub>2</sub>   |                | b <sub>2</sub>                         | y <sub>3</sub>                  | VDE                        | y <sub>5</sub>              | b <sub>5</sub>     | y <sup>++10</sup> |             | y <sub>11</sub> <sup>++2</sup> | VDELK                                                                                        | y <sub>7</sub>     |           | y <sub>12</sub> <sup>++2</sup> |           | y <sub>13</sub> <sup>++2</sup> | y <sub>14</sub> +H <sub>2</sub> O <sup>++2</sup> | y <sub>14</sub> <sup>++2</sup> | y <sub>6</sub> | y <sub>15</sub> <sup>++2</sup> | y <sub>9</sub> | y <sub>10</sub> |         |         |           |         |         |           |           |           |           |           |           |         |           |         |          |                         |      |      |       |       |      |      |      |      |      |      |      |      |      |      |      |      |      |      |      |      |       |      |      |      |      |                       |      |      |       |       |      |       |      |      |       |      |      |      |       |      |      |       |      |       |       |       |        |       |       |       |      |       |      |      |      |      |       |      |      |      |      |      |      |       |      |      |      |       |      |       |      |      |      |      |      |      |      |          |   |    |                |                |  |                |                |     |                |                |                   |  |                                |       |                |  |                                |  |                                |                                                  |                                |                |                                |                |                 |           |     |     |      |      |  |      |     |     |     |  |      |  |     |      |      |  |     |  |      |     |      |      |     |      |      |
| Delta ppm                                                                                                                                                                                                                                                                                                                                                                                                                                                                                                                                                                                                                                                                                                                                                                                                                                                                                                                                                                                                                                                                                                                                                                                                                                                                                                                                                                                                                                                                                                                                                                                                                                                                                                                                                                                                                                                                                                                                                                                                                                                                                                                                                                                                                                                                                                                                                                                                                                                                                                                                                                                                                                                                                                                                                                                             | 8.7    | 7.4     | -8.4           | -3.4             |                | -1.8                                   | 8.5                             | 2.8                        | 0.7                         |                    | -5.8              |             | 4.3                            | -0.3                                                                                         | -4.4               |           | 0.5                            |           | -5.4                           | 1.7                                              | -1.9                           | -1.2           | 4.4                            | -4.0           | -8.3            |         |         |           |         |         |           |           |           |           |           |           |         |           |         |          |                         |      |      |       |       |      |      |      |      |      |      |      |      |      |      |      |      |      |      |      |      |       |      |      |      |      |                       |      |      |       |       |      |       |      |      |       |      |      |      |       |      |      |       |      |       |       |       |        |       |       |       |      |       |      |      |      |      |       |      |      |      |      |      |      |       |      |      |      |       |      |       |      |      |      |      |      |      |      |          |   |    |                |                |  |                |                |     |                |                |                   |  |                                |       |                |  |                                |  |                                |                                                  |                                |                |                                |                |                 |           |     |     |      |      |  |      |     |     |     |  |      |  |     |      |      |  |     |  |      |     |      |      |     |      |      |

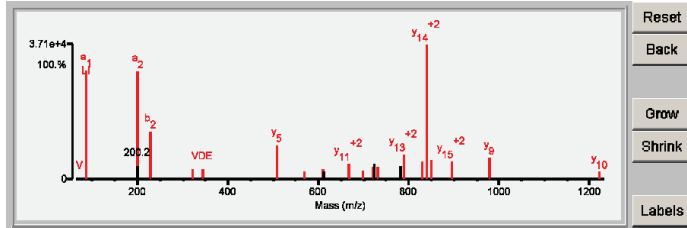

Result Summary

| Rank | Score | SPI (%) | BCS | # Unmatched Ions | Variable sites | Sequence                  | MH <sup>+</sup> Calculated (Da) | MH <sup>+</sup> Error (Da) | MH <sup>+</sup> Error (ppm) | Protein MW/pI (Da) | Species | Accession # | Protein Name                                                    |
|------|-------|---------|-----|------------------|----------------|---------------------------|---------------------------------|----------------------------|-----------------------------|--------------------|---------|-------------|-----------------------------------------------------------------|
| 1    | 17.82 | 84.2    | 8   | 4/25             | K112k          | (K)GETKAFYPPEEISSMVLTK(M) | 2030.0151                       | 114.0684                   | 11.9                        | 70052.6/5.48       | HUMAN   | P08107      | Heat shock 70 kDa protein 1 OS=Homo sapiens GN=HSPA1A PE=1 SV=5 |

Detailed Results

| Rank | Score | SPI (%) | BCS | # Unmatched Ions | Variable sites | Sequence                                       | MH <sup>+</sup> Calculated (Da) | MH <sup>+</sup> Error (Da) | MH <sup>+</sup> Error (ppm) | Protein MW/pI (Da) | Species | Accession # | MS-Digest Index # | Protein Name                                                    |
|------|-------|---------|-----|------------------|----------------|------------------------------------------------|---------------------------------|----------------------------|-----------------------------|--------------------|---------|-------------|-------------------|-----------------------------------------------------------------|
| 1    | 17.82 | 84.2    | 8   | 4/25             | K112k          | (K)G E V T K A F Y I P E E I S S M V L T K (M) | 2030.0151                       | 114.0684                   | 11.9                        | 70052.6/5.48       | HUMAN   | P08107      | 300447            | Heat shock 70 kDa protein 1 OS=Homo sapiens GN=HSPA1A PE=1 SV=5 |

  

| Fragment-ion (m/z)      | 70.065 | 72.079 | 84.044 | 84.082 | 86.097 | 120.080 | 129.101 | 136.073 | 187.072        | 227.106 | 343.124 | 356.137 | 361.246        | 433.203 | 517.317 | 617.327 <sup>+2</sup>        | 638.790 | 678.381        | 698.858 <sup>+2</sup>         | 725.360 | 765.424        | 878.494        | 893.420                          | 911.424        | 1007.564       |
|-------------------------|--------|--------|--------|--------|--------|---------|---------|---------|----------------|---------|---------|---------|----------------|---------|---------|------------------------------|---------|----------------|-------------------------------|---------|----------------|----------------|----------------------------------|----------------|----------------|
| Frac. Inten. (% of TIC) | 0.00   | 0.11   | 0.11   | 0.17   | 0.46   | 0.16    | 0.10    | 0.19    | 4.34           | 7.50    | 4.67    | 7.50    | 3.35           | 3.90    | 3.94    | 19.67                        | 3.32    | 6.22           | 3.09                          | 4.55    | 7.21           | 7.10           | 3.14                             | 5.96           | 3.25           |
| Rel. Inten. (% of BP)   | 0.02   | 0.54   | 0.54   | 0.89   | 2.35   | 0.81    | 0.49    | 0.99    | 22.06          | 38.15   | 23.72   | 38.12   | 17.03          | 19.84   | 20.05   | 100.00                       | 16.86   | 31.64          | 15.70                         | 23.12   | 36.63          | 36.10          | 15.97                            | 30.28          | 16.52          |
| Score                   | 0.20   | 0.50   | 1.00   | 0.50   | 0.22   | 1.00    | 0.20    | 1.00    | 0.50           | 0.75    | -0.24   | 0.75    | 1.50           | -0.20   | -0.20   | 1.50                         | 1.50    | 1.50           | 1.50                          | 0.75    | 1.50           | 1.50           | 0.25                             | 0.50           | 1.50           |
| Ion-type                | PR     | V      | E      | KQ     | LI     | F       | RKQ     | Y       | b <sub>2</sub> | PE      |         | PEE     | y <sub>3</sub> |         |         | y <sub>1</sub> <sup>+2</sup> |         | y <sub>6</sub> | y <sub>12</sub> <sup>+2</sup> | TkAFY   | y <sub>7</sub> | y <sub>8</sub> | b <sub>7</sub> -H <sub>2</sub> O | b <sub>7</sub> | y <sub>9</sub> |
| Delta ppm               | 2.5    | -21.9  | -5.8   | 13.4   | 0.9    | -5.6    | -8.8    | -22.0   | -3.9           | 8.2     |         | -27.3   | 4.3            |         |         | 5.2                          |         | -7.0           | 4.6                           | -4.3    | 9.1            | -8.7           | 4.6                              | -3.0           | 20.1           |

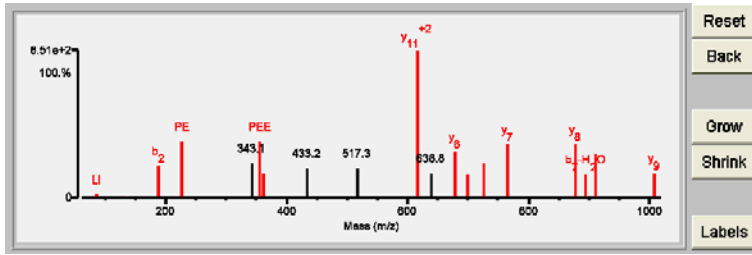

Reset

Back

Grow

Shrink

Labels



Result Summary

| Rank | Score | SPI (%) | BCS | # Unmatched Ions | Variable sites | Sequence               | MH <sup>+</sup> Calculated (Da) | MH <sup>+</sup> Error (Da) | MH <sup>+</sup> Error (ppm) | Protein MW/pl (Da) | Species | Accession # | Protein Name                                                    |
|------|-------|---------|-----|------------------|----------------|------------------------|---------------------------------|----------------------------|-----------------------------|--------------------|---------|-------------|-----------------------------------------------------------------|
| 1    | 16.96 | 79.7    | 8   | 6/25             | K126k          | (K)AFYPEEISSMVLTKMK(E) | 1873.9438                       | 114.0550                   | 6.1                         | 70052.6/5.48       | HUMAN   | P08107      | Heat shock 70 kDa protein 1 OS=Homo sapiens GN=HSPA1A PE=1 SV=5 |
| 2    | 15.24 | 76.6    | 7   | 7/25             | K128k          | (K)AFYPEEISSMVLTKMK(E) | 1873.9438                       | 114.0550                   | 6.1                         | 70052.6/5.48       | HUMAN   | P08107      | Heat shock 70 kDa protein 1 OS=Homo sapiens GN=HSPA1A PE=1 SV=5 |

Detailed Results

| Rank                                                                                                                                                                                                                                                                                                                                                                                                                                                                                                                                                                                                                                                                                                                                                                                                                                                                                                                                                                                                                                                                                                                                                                                                                                                                                                                                                                                                                                                                                                                                                                                                                                                                                                                                                                                                                                                                                                                                                                                                                                                                                                                                                                                                                                                                                                                                                                                                                                                                                                                                                        | Score  | SPI (%) | BCS    | # Unmatched Ions | Variable sites | Sequence                                   | MH <sup>+</sup> Calculated (Da) | MH <sup>+</sup> Error (Da) | MH <sup>+</sup> Error (ppm) | Protein MW/pl (Da) | Species | Accession # | MS-Digest Index # | Protein Name                                                    |                    |         |         |         |         |         |                       |                       |         |                       |          |         |         |         |         |         |         |         |         |         |         |                       |                       |         |                       |          |                         |      |      |      |      |      |      |      |       |      |      |      |      |      |      |      |      |      |      |      |      |       |      |      |      |      |                       |      |      |       |      |       |      |      |       |       |       |       |       |       |       |       |       |       |       |       |       |        |       |       |       |       |       |      |      |       |      |       |      |      |      |      |       |      |      |       |      |      |       |      |      |      |      |      |       |      |      |      |          |    |   |  |    |  |   |   |    |       |    |  |    |    |  |     |    |  |    |    |    |                   |  |    |                   |    |           |       |       |  |       |  |       |      |       |      |     |  |      |     |  |       |      |  |     |       |      |     |  |      |       |       |
|-------------------------------------------------------------------------------------------------------------------------------------------------------------------------------------------------------------------------------------------------------------------------------------------------------------------------------------------------------------------------------------------------------------------------------------------------------------------------------------------------------------------------------------------------------------------------------------------------------------------------------------------------------------------------------------------------------------------------------------------------------------------------------------------------------------------------------------------------------------------------------------------------------------------------------------------------------------------------------------------------------------------------------------------------------------------------------------------------------------------------------------------------------------------------------------------------------------------------------------------------------------------------------------------------------------------------------------------------------------------------------------------------------------------------------------------------------------------------------------------------------------------------------------------------------------------------------------------------------------------------------------------------------------------------------------------------------------------------------------------------------------------------------------------------------------------------------------------------------------------------------------------------------------------------------------------------------------------------------------------------------------------------------------------------------------------------------------------------------------------------------------------------------------------------------------------------------------------------------------------------------------------------------------------------------------------------------------------------------------------------------------------------------------------------------------------------------------------------------------------------------------------------------------------------------------|--------|---------|--------|------------------|----------------|--------------------------------------------|---------------------------------|----------------------------|-----------------------------|--------------------|---------|-------------|-------------------|-----------------------------------------------------------------|--------------------|---------|---------|---------|---------|---------|-----------------------|-----------------------|---------|-----------------------|----------|---------|---------|---------|---------|---------|---------|---------|---------|---------|---------|-----------------------|-----------------------|---------|-----------------------|----------|-------------------------|------|------|------|------|------|------|------|-------|------|------|------|------|------|------|------|------|------|------|------|------|-------|------|------|------|------|-----------------------|------|------|-------|------|-------|------|------|-------|-------|-------|-------|-------|-------|-------|-------|-------|-------|-------|-------|-------|--------|-------|-------|-------|-------|-------|------|------|-------|------|-------|------|------|------|------|-------|------|------|-------|------|------|-------|------|------|------|------|------|-------|------|------|------|----------|----|---|--|----|--|---|---|----|-------|----|--|----|----|--|-----|----|--|----|----|----|-------------------|--|----|-------------------|----|-----------|-------|-------|--|-------|--|-------|------|-------|------|-----|--|------|-----|--|-------|------|--|-----|-------|------|-----|--|------|-------|-------|
| 1                                                                                                                                                                                                                                                                                                                                                                                                                                                                                                                                                                                                                                                                                                                                                                                                                                                                                                                                                                                                                                                                                                                                                                                                                                                                                                                                                                                                                                                                                                                                                                                                                                                                                                                                                                                                                                                                                                                                                                                                                                                                                                                                                                                                                                                                                                                                                                                                                                                                                                                                                           | 16.96  | 79.7    | 8      | 6/25             | K126k          | (K)A F I Y I P E E I S S M V L T K M K (E) | 1873.9438                       | 114.0550                   | 6.1                         | 70052.6/5.48       | HUMAN   | P08107      | 300447            | Heat shock 70 kDa protein 1 OS=Homo sapiens GN=HSPA1A PE=1 SV=5 |                    |         |         |         |         |         |                       |                       |         |                       |          |         |         |         |         |         |         |         |         |         |         |                       |                       |         |                       |          |                         |      |      |      |      |      |      |      |       |      |      |      |      |      |      |      |      |      |      |      |      |       |      |      |      |      |                       |      |      |       |      |       |      |      |       |       |       |       |       |       |       |       |       |       |       |       |       |        |       |       |       |       |       |      |      |       |      |       |      |      |      |      |       |      |      |       |      |      |       |      |      |      |      |      |       |      |      |      |          |    |   |  |    |  |   |   |    |       |    |  |    |    |  |     |    |  |    |    |    |                   |  |    |                   |    |           |       |       |  |       |  |       |      |       |      |     |  |      |     |  |       |      |  |     |       |      |     |  |      |       |       |
| <table border="1"> <thead> <tr> <th>Fragment-ion (m/z)</th> <th>70.063</th> <th>72.079</th> <th>84.077</th> <th>86.095</th> <th>104.051</th> <th>120.079</th> <th>136.075</th> <th>191.114</th> <th>199.107</th> <th>219.114</th> <th>220.115</th> <th>227.103</th> <th>278.154</th> <th>343.182</th> <th>356.140</th> <th>382.176</th> <th>507.284</th> <th>520.296</th> <th>621.331</th> <th>734.420</th> <th>803.913<sup>+2</sup></th> <th>805.434<sup>+2</sup></th> <th>833.503</th> <th>885.426<sup>+2</sup></th> <th>1138.582</th> </tr> </thead> <tbody> <tr> <td>Frac. Inten. (% of TIC)</td> <td>0.00</td> <td>0.10</td> <td>7.62</td> <td>0.25</td> <td>1.94</td> <td>0.23</td> <td>0.30</td> <td>10.18</td> <td>2.00</td> <td>6.77</td> <td>2.58</td> <td>3.83</td> <td>3.10</td> <td>2.36</td> <td>4.52</td> <td>2.51</td> <td>2.55</td> <td>3.26</td> <td>5.21</td> <td>8.37</td> <td>13.88</td> <td>3.21</td> <td>3.58</td> <td>8.30</td> <td>3.34</td> </tr> <tr> <td>Rel. Inten. (% of BP)</td> <td>0.02</td> <td>0.73</td> <td>54.89</td> <td>1.80</td> <td>13.95</td> <td>1.63</td> <td>2.15</td> <td>73.37</td> <td>14.43</td> <td>48.76</td> <td>18.59</td> <td>27.55</td> <td>22.31</td> <td>17.02</td> <td>32.57</td> <td>18.07</td> <td>18.34</td> <td>23.49</td> <td>37.56</td> <td>60.29</td> <td>100.00</td> <td>23.12</td> <td>25.81</td> <td>59.82</td> <td>24.05</td> </tr> <tr> <td>Score</td> <td>0.20</td> <td>0.50</td> <td>-0.55</td> <td>0.22</td> <td>-0.14</td> <td>1.00</td> <td>1.00</td> <td>0.50</td> <td>0.50</td> <td>-0.19</td> <td>0.75</td> <td>1.50</td> <td>-0.17</td> <td>0.75</td> <td>0.50</td> <td>-0.18</td> <td>1.50</td> <td>1.50</td> <td>1.50</td> <td>1.50</td> <td>1.50</td> <td>-0.23</td> <td>1.50</td> <td>1.50</td> <td>1.50</td> </tr> <tr> <td>Ion-type</td> <td>PR</td> <td>V</td> <td></td> <td>LI</td> <td></td> <td>F</td> <td>Y</td> <td>a2</td> <td>PE-28</td> <td>b2</td> <td></td> <td>PE</td> <td>y2</td> <td></td> <td>PEE</td> <td>b3</td> <td></td> <td>y3</td> <td>y4</td> <td>y5</td> <td>y13<sup>+2</sup></td> <td></td> <td>y6</td> <td>y14<sup>+2</sup></td> <td>y9</td> </tr> <tr> <td>Delta ppm</td> <td>-27.5</td> <td>-17.7</td> <td></td> <td>-14.2</td> <td></td> <td>-13.1</td> <td>-2.9</td> <td>-24.0</td> <td>-9.1</td> <td>2.7</td> <td></td> <td>-1.9</td> <td>1.1</td> <td></td> <td>-17.5</td> <td>-2.7</td> <td></td> <td>9.1</td> <td>-12.3</td> <td>-4.5</td> <td>0.8</td> <td></td> <td>13.6</td> <td>-21.4</td> <td>-12.1</td> </tr> </tbody> </table> |        |         |        |                  |                |                                            |                                 |                            |                             |                    |         |             |                   |                                                                 | Fragment-ion (m/z) | 70.063  | 72.079  | 84.077  | 86.095  | 104.051 | 120.079               | 136.075               | 191.114 | 199.107               | 219.114  | 220.115 | 227.103 | 278.154 | 343.182 | 356.140 | 382.176 | 507.284 | 520.296 | 621.331 | 734.420 | 803.913 <sup>+2</sup> | 805.434 <sup>+2</sup> | 833.503 | 885.426 <sup>+2</sup> | 1138.582 | Frac. Inten. (% of TIC) | 0.00 | 0.10 | 7.62 | 0.25 | 1.94 | 0.23 | 0.30 | 10.18 | 2.00 | 6.77 | 2.58 | 3.83 | 3.10 | 2.36 | 4.52 | 2.51 | 2.55 | 3.26 | 5.21 | 8.37 | 13.88 | 3.21 | 3.58 | 8.30 | 3.34 | Rel. Inten. (% of BP) | 0.02 | 0.73 | 54.89 | 1.80 | 13.95 | 1.63 | 2.15 | 73.37 | 14.43 | 48.76 | 18.59 | 27.55 | 22.31 | 17.02 | 32.57 | 18.07 | 18.34 | 23.49 | 37.56 | 60.29 | 100.00 | 23.12 | 25.81 | 59.82 | 24.05 | Score | 0.20 | 0.50 | -0.55 | 0.22 | -0.14 | 1.00 | 1.00 | 0.50 | 0.50 | -0.19 | 0.75 | 1.50 | -0.17 | 0.75 | 0.50 | -0.18 | 1.50 | 1.50 | 1.50 | 1.50 | 1.50 | -0.23 | 1.50 | 1.50 | 1.50 | Ion-type | PR | V |  | LI |  | F | Y | a2 | PE-28 | b2 |  | PE | y2 |  | PEE | b3 |  | y3 | y4 | y5 | y13 <sup>+2</sup> |  | y6 | y14 <sup>+2</sup> | y9 | Delta ppm | -27.5 | -17.7 |  | -14.2 |  | -13.1 | -2.9 | -24.0 | -9.1 | 2.7 |  | -1.9 | 1.1 |  | -17.5 | -2.7 |  | 9.1 | -12.3 | -4.5 | 0.8 |  | 13.6 | -21.4 | -12.1 |
| Fragment-ion (m/z)                                                                                                                                                                                                                                                                                                                                                                                                                                                                                                                                                                                                                                                                                                                                                                                                                                                                                                                                                                                                                                                                                                                                                                                                                                                                                                                                                                                                                                                                                                                                                                                                                                                                                                                                                                                                                                                                                                                                                                                                                                                                                                                                                                                                                                                                                                                                                                                                                                                                                                                                          | 70.063 | 72.079  | 84.077 | 86.095           | 104.051        | 120.079                                    | 136.075                         | 191.114                    | 199.107                     | 219.114            | 220.115 | 227.103     | 278.154           | 343.182                                                         | 356.140            | 382.176 | 507.284 | 520.296 | 621.331 | 734.420 | 803.913 <sup>+2</sup> | 805.434 <sup>+2</sup> | 833.503 | 885.426 <sup>+2</sup> | 1138.582 |         |         |         |         |         |         |         |         |         |         |                       |                       |         |                       |          |                         |      |      |      |      |      |      |      |       |      |      |      |      |      |      |      |      |      |      |      |      |       |      |      |      |      |                       |      |      |       |      |       |      |      |       |       |       |       |       |       |       |       |       |       |       |       |       |        |       |       |       |       |       |      |      |       |      |       |      |      |      |      |       |      |      |       |      |      |       |      |      |      |      |      |       |      |      |      |          |    |   |  |    |  |   |   |    |       |    |  |    |    |  |     |    |  |    |    |    |                   |  |    |                   |    |           |       |       |  |       |  |       |      |       |      |     |  |      |     |  |       |      |  |     |       |      |     |  |      |       |       |
| Frac. Inten. (% of TIC)                                                                                                                                                                                                                                                                                                                                                                                                                                                                                                                                                                                                                                                                                                                                                                                                                                                                                                                                                                                                                                                                                                                                                                                                                                                                                                                                                                                                                                                                                                                                                                                                                                                                                                                                                                                                                                                                                                                                                                                                                                                                                                                                                                                                                                                                                                                                                                                                                                                                                                                                     | 0.00   | 0.10    | 7.62   | 0.25             | 1.94           | 0.23                                       | 0.30                            | 10.18                      | 2.00                        | 6.77               | 2.58    | 3.83        | 3.10              | 2.36                                                            | 4.52               | 2.51    | 2.55    | 3.26    | 5.21    | 8.37    | 13.88                 | 3.21                  | 3.58    | 8.30                  | 3.34     |         |         |         |         |         |         |         |         |         |         |                       |                       |         |                       |          |                         |      |      |      |      |      |      |      |       |      |      |      |      |      |      |      |      |      |      |      |      |       |      |      |      |      |                       |      |      |       |      |       |      |      |       |       |       |       |       |       |       |       |       |       |       |       |       |        |       |       |       |       |       |      |      |       |      |       |      |      |      |      |       |      |      |       |      |      |       |      |      |      |      |      |       |      |      |      |          |    |   |  |    |  |   |   |    |       |    |  |    |    |  |     |    |  |    |    |    |                   |  |    |                   |    |           |       |       |  |       |  |       |      |       |      |     |  |      |     |  |       |      |  |     |       |      |     |  |      |       |       |
| Rel. Inten. (% of BP)                                                                                                                                                                                                                                                                                                                                                                                                                                                                                                                                                                                                                                                                                                                                                                                                                                                                                                                                                                                                                                                                                                                                                                                                                                                                                                                                                                                                                                                                                                                                                                                                                                                                                                                                                                                                                                                                                                                                                                                                                                                                                                                                                                                                                                                                                                                                                                                                                                                                                                                                       | 0.02   | 0.73    | 54.89  | 1.80             | 13.95          | 1.63                                       | 2.15                            | 73.37                      | 14.43                       | 48.76              | 18.59   | 27.55       | 22.31             | 17.02                                                           | 32.57              | 18.07   | 18.34   | 23.49   | 37.56   | 60.29   | 100.00                | 23.12                 | 25.81   | 59.82                 | 24.05    |         |         |         |         |         |         |         |         |         |         |                       |                       |         |                       |          |                         |      |      |      |      |      |      |      |       |      |      |      |      |      |      |      |      |      |      |      |      |       |      |      |      |      |                       |      |      |       |      |       |      |      |       |       |       |       |       |       |       |       |       |       |       |       |       |        |       |       |       |       |       |      |      |       |      |       |      |      |      |      |       |      |      |       |      |      |       |      |      |      |      |      |       |      |      |      |          |    |   |  |    |  |   |   |    |       |    |  |    |    |  |     |    |  |    |    |    |                   |  |    |                   |    |           |       |       |  |       |  |       |      |       |      |     |  |      |     |  |       |      |  |     |       |      |     |  |      |       |       |
| Score                                                                                                                                                                                                                                                                                                                                                                                                                                                                                                                                                                                                                                                                                                                                                                                                                                                                                                                                                                                                                                                                                                                                                                                                                                                                                                                                                                                                                                                                                                                                                                                                                                                                                                                                                                                                                                                                                                                                                                                                                                                                                                                                                                                                                                                                                                                                                                                                                                                                                                                                                       | 0.20   | 0.50    | -0.55  | 0.22             | -0.14          | 1.00                                       | 1.00                            | 0.50                       | 0.50                        | -0.19              | 0.75    | 1.50        | -0.17             | 0.75                                                            | 0.50               | -0.18   | 1.50    | 1.50    | 1.50    | 1.50    | 1.50                  | -0.23                 | 1.50    | 1.50                  | 1.50     |         |         |         |         |         |         |         |         |         |         |                       |                       |         |                       |          |                         |      |      |      |      |      |      |      |       |      |      |      |      |      |      |      |      |      |      |      |      |       |      |      |      |      |                       |      |      |       |      |       |      |      |       |       |       |       |       |       |       |       |       |       |       |       |       |        |       |       |       |       |       |      |      |       |      |       |      |      |      |      |       |      |      |       |      |      |       |      |      |      |      |      |       |      |      |      |          |    |   |  |    |  |   |   |    |       |    |  |    |    |  |     |    |  |    |    |    |                   |  |    |                   |    |           |       |       |  |       |  |       |      |       |      |     |  |      |     |  |       |      |  |     |       |      |     |  |      |       |       |
| Ion-type                                                                                                                                                                                                                                                                                                                                                                                                                                                                                                                                                                                                                                                                                                                                                                                                                                                                                                                                                                                                                                                                                                                                                                                                                                                                                                                                                                                                                                                                                                                                                                                                                                                                                                                                                                                                                                                                                                                                                                                                                                                                                                                                                                                                                                                                                                                                                                                                                                                                                                                                                    | PR     | V       |        | LI               |                | F                                          | Y                               | a2                         | PE-28                       | b2                 |         | PE          | y2                |                                                                 | PEE                | b3      |         | y3      | y4      | y5      | y13 <sup>+2</sup>     |                       | y6      | y14 <sup>+2</sup>     | y9       |         |         |         |         |         |         |         |         |         |         |                       |                       |         |                       |          |                         |      |      |      |      |      |      |      |       |      |      |      |      |      |      |      |      |      |      |      |      |       |      |      |      |      |                       |      |      |       |      |       |      |      |       |       |       |       |       |       |       |       |       |       |       |       |       |        |       |       |       |       |       |      |      |       |      |       |      |      |      |      |       |      |      |       |      |      |       |      |      |      |      |      |       |      |      |      |          |    |   |  |    |  |   |   |    |       |    |  |    |    |  |     |    |  |    |    |    |                   |  |    |                   |    |           |       |       |  |       |  |       |      |       |      |     |  |      |     |  |       |      |  |     |       |      |     |  |      |       |       |
| Delta ppm                                                                                                                                                                                                                                                                                                                                                                                                                                                                                                                                                                                                                                                                                                                                                                                                                                                                                                                                                                                                                                                                                                                                                                                                                                                                                                                                                                                                                                                                                                                                                                                                                                                                                                                                                                                                                                                                                                                                                                                                                                                                                                                                                                                                                                                                                                                                                                                                                                                                                                                                                   | -27.5  | -17.7   |        | -14.2            |                | -13.1                                      | -2.9                            | -24.0                      | -9.1                        | 2.7                |         | -1.9        | 1.1               |                                                                 | -17.5              | -2.7    |         | 9.1     | -12.3   | -4.5    | 0.8                   |                       | 13.6    | -21.4                 | -12.1    |         |         |         |         |         |         |         |         |         |         |                       |                       |         |                       |          |                         |      |      |      |      |      |      |      |       |      |      |      |      |      |      |      |      |      |      |      |      |       |      |      |      |      |                       |      |      |       |      |       |      |      |       |       |       |       |       |       |       |       |       |       |       |       |       |        |       |       |       |       |       |      |      |       |      |       |      |      |      |      |       |      |      |       |      |      |       |      |      |      |      |      |       |      |      |      |          |    |   |  |    |  |   |   |    |       |    |  |    |    |  |     |    |  |    |    |    |                   |  |    |                   |    |           |       |       |  |       |  |       |      |       |      |     |  |      |     |  |       |      |  |     |       |      |     |  |      |       |       |

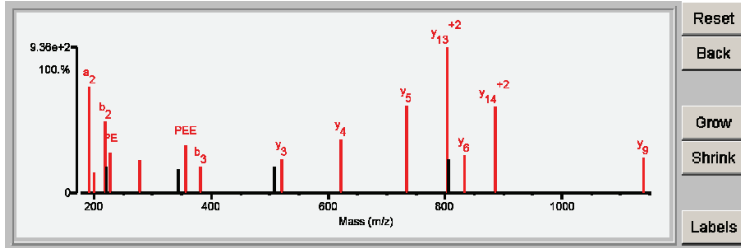

Result Summary

| Rank | Score | SPI (%) | BCS | # Unmatched Ions | # Variable sites | Sequence               | MH <sup>+</sup> Calculated (Da) | MH <sup>+</sup> Error (Da) | MH <sup>+</sup> Error (ppm) | Protein MW/pl (Da) | Species | Accession # | Protein Name                                                    |
|------|-------|---------|-----|------------------|------------------|------------------------|---------------------------------|----------------------------|-----------------------------|--------------------|---------|-------------|-----------------------------------------------------------------|
| 1    | 14.85 | 74.3    | 7   | 5/24             | K126k            | (K)AFYPEEISSMVLTKMK(E) | 1873.9438                       | 114.0640                   | 10.6                        | 70052.6/5.48       | HUMAN   | P08107      | Heat shock 70 kDa protein 1 OS=Homo sapiens GN=HSPA1A PE=1 SV=5 |
| 2    | 13.66 | 70.2    | 7   | 6/24             | K128k            | (K)AFYPEEISSMVLTKMK(E) | 1873.9438                       | 114.0640                   | 10.6                        | 70052.6/5.48       | HUMAN   | P08107      | Heat shock 70 kDa protein 1 OS=Homo sapiens GN=HSPA1A PE=1 SV=5 |

Detailed Results

| Rank | Score | SPI (%) | BCS | # Unmatched Ions | # Variable sites | Sequence                                 | MH <sup>+</sup> Calculated (Da) | MH <sup>+</sup> Error (Da) | MH <sup>+</sup> Error (ppm) | Protein MW/pl (Da) | Species | Accession # | MS-Digest Index # | Protein Name                                                    |
|------|-------|---------|-----|------------------|------------------|------------------------------------------|---------------------------------|----------------------------|-----------------------------|--------------------|---------|-------------|-------------------|-----------------------------------------------------------------|
| 1    | 14.85 | 74.3    | 7   | 5/24             | K126k            | (K)A F I Y P E E I S S M V L T K M K (E) | 1873.9438                       | 114.0640                   | 10.6                        | 70052.6/5.48       | HUMAN   | P08107      | 300447            | Heat shock 70 kDa protein 1 OS=Homo sapiens GN=HSPA1A PE=1 SV=5 |

| Fragment-ion (m/z)      | 70.064 | 72.079 | 84.080 | 86.096 | 120.079 | 132.102 | 136.076 | 191.113        | 219.110        | 356.142 | 374.192 | 469.225 | 500.232 | 520.289        | 621.338        | 716.415                          | 724.409 | 734.413        | 789.402 <sup>+2</sup> | 803.908 | 804.400            | 885.455        | 964.561        | 1138.591 |
|-------------------------|--------|--------|--------|--------|---------|---------|---------|----------------|----------------|---------|---------|---------|---------|----------------|----------------|----------------------------------|---------|----------------|-----------------------|---------|--------------------|----------------|----------------|----------|
| Frac. Inten. (% of TIC) | 0.01   | 0.26   | 0.12   | 0.29   | 0.31    | 4.24    | 0.42    | 7.91           | 6.66           | 9.12    | 4.07    | 3.79    | 4.84    | 3.53           | 4.97           | 3.54                             | 3.68    | 5.95           | 4.02                  | 6.25    | 8.93               | 8.79           | 4.56           | 3.75     |
| Rel. Inten. (% of BP)   | 0.07   | 2.87   | 1.36   | 3.19   | 3.39    | 46.48   | 4.65    | 86.67          | 72.97          | 100.00  | 44.61   | 41.57   | 53.02   | 38.73          | 54.44          | 38.82                            | 40.36   | 65.18          | 44.02                 | 68.47   | 97.92              | 96.33          | 50.02          | 41.15    |
| Score                   | 0.20   | 0.50   | 0.50   | 0.22   | 1.00    | -0.46   | 1.00    | 0.50           | 0.50           | 0.75    | 0.75    | 0.75    | -0.53   | 1.50           | 1.50           | 0.50                             | -0.40   | 1.50           | -0.44                 | 1.50    | -0.98              | 1.50           | 1.50           | 1.50     |
| Ion-type                | PR     | V      | KQ     | LI     | F       |         | Y       | a <sub>2</sub> | b <sub>2</sub> | PEE     | kM      | PEEI    |         | y <sub>3</sub> | y <sub>4</sub> | y <sub>5</sub> +H <sub>2</sub> O |         | y <sub>5</sub> | y <sup>++</sup> 13    |         | y <sup>++</sup> 14 | y <sub>7</sub> | y <sub>9</sub> |          |
| Delta ppm               | -16.1  | -27.4  | -11.6  | -7.3   | -12.3   |         | 4.5     | -25.1          | -11.4          | -9.9    | 17.5    | -8.7    |         | -3.4           | -0.6           | 4.2                              |         | -13.4          |                       | -5.7    |                    | 12.0           | 30.3           | -4.1     |

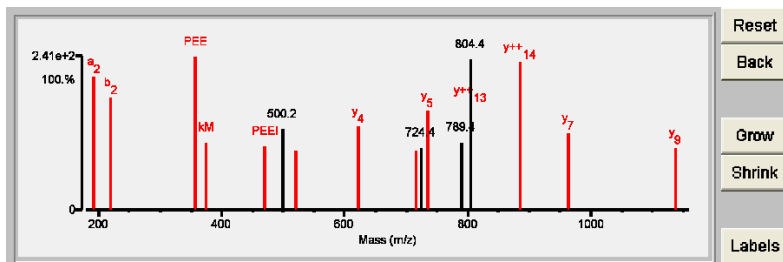

Result Summary

| Rank | Score | SPI (%) | BCS | # Unmatched Ions | Variable sites | Sequence               | MH <sup>+</sup> Calculated (Da) | MH <sup>+</sup> Error (Da) | MH <sup>+</sup> Error (ppm) | Protein MW/pl (Da) | Species | Accession # | Protein Name                                                    |
|------|-------|---------|-----|------------------|----------------|------------------------|---------------------------------|----------------------------|-----------------------------|--------------------|---------|-------------|-----------------------------------------------------------------|
| 1    | 20.79 | 94.4    | 11  | 2/24             | K524k          | (R)MVQEAEEKYKADEVQR(E) | 1952.9382                       | 114.0664                   | 11.3                        | 70052.6/5.48       | HUMAN   | P08107      | Heat shock 70 kDa protein 1 OS=Homo sapiens GN=HSPA1A PE=1 SV=5 |
| 2    | 19.12 | 92.0    | 10  | 3/24             | K526k          | (R)MVQEAEEKYKADEVQR(E) | 1952.9382                       | 114.0664                   | 11.3                        | 70052.6/5.48       | HUMAN   | P08107      | Heat shock 70 kDa protein 1 OS=Homo sapiens GN=HSPA1A PE=1 SV=5 |

Detailed Results

| Rank | Score | SPI (%) | BCS | # Unmatched Ions | Variable sites | Sequence                               | MH <sup>+</sup> Calculated (Da) | MH <sup>+</sup> Error (Da) | MH <sup>+</sup> Error (ppm) | Protein MW/pl (Da) | Species | Accession # | MS-Digest Index # | Protein Name                                                    |
|------|-------|---------|-----|------------------|----------------|----------------------------------------|---------------------------------|----------------------------|-----------------------------|--------------------|---------|-------------|-------------------|-----------------------------------------------------------------|
| 1    | 20.79 | 94.4    | 11  | 2/24             | K524k          | (R)M V Q/E/A E/K Y/K/A/E/D/E/V/Q/R (E) | 1952.9382                       | 114.0664                   | 11.3                        | 70052.6/5.48       | HUMAN   | P08107      | 300447            | Heat shock 70 kDa protein 1 OS=Homo sapiens GN=HSPA1A PE=1 SV=5 |

  

| Fragment-ion (m/z)      | 61.010 | 72.080 | 84.044 | 84.080 | 101.070 | 102.055 | 104.052 | 129.102 | 158.099 | 175.118 | 203.121 | 286.152 | 303.179 | 402.247 | 531.288 | 569.280 <sup>+3</sup> | 606.963 <sup>+3</sup> | 646.320 | 690.353 <sup>+2</sup> | 775.359 | 790.389 <sup>+2</sup> | 846.398 | 854.914 <sup>+2</sup> | 874.490 |
|-------------------------|--------|--------|--------|--------|---------|---------|---------|---------|---------|---------|---------|---------|---------|---------|---------|-----------------------|-----------------------|---------|-----------------------|---------|-----------------------|---------|-----------------------|---------|
| Frac. Inten. (% of TIC) | 3.00   | 0.50   | 0.25   | 0.52   | 0.14    | 0.17    | 11.13   | 0.30    | 9.86    | 4.61    | 13.73   | 2.39    | 5.93    | 5.18    | 4.50    | 2.61                  | 10.42                 | 4.27    | 2.66                  | 2.61    | 2.55                  | 7.40    | 2.93                  | 2.35    |
| Rel. Inten. (% of BP)   | 21.86  | 3.68   | 1.85   | 3.76   | 1.02    | 1.21    | 81.10   | 2.22    | 71.81   | 33.58   | 100.00  | 17.44   | 43.19   | 37.72   | 32.78   | 19.00                 | 75.88                 | 31.11   | 19.39                 | 19.04   | 18.55                 | 53.94   | 21.34                 | 17.14   |
| Score                   | -0.22  | 0.50   | 1.00   | 0.50   |         |         | 0.50    | 0.20    | 0.50    | 1.50    | 0.50    | 0.50    | 1.50    | 1.50    | 1.50    | -0.19                 | 0.50                  | 1.50    | 1.50                  | 1.50    | 1.50                  | 1.50    | 1.50                  | 1.50    |
| Ion-type                | V      | E      | KQ     | KQ     | KQ      | E       | a1      | RKQ     | y1-NH3  | y1      | a2      | y2-NH3  | y2      | y3      | y4      | y14-H2O <sup>+3</sup> | y5                    | y6      | y10 <sup>+2</sup>     | y6      | y12 <sup>+2</sup>     | y7      | y13 <sup>+2</sup>     | y8      |
| Delta ppm               |        | -6.6   | -5.8   | -8.0   |         |         | -15.8   | -3.4    | 39.2    | -3.2    | -7.2    | 3.9     | 4.5     | 3.1     | -0.3    |                       | 7.8                   | 7.5     | 5.0                   | 0.6     | -0.1                  | 3.7     | 4.6                   | -0.3    |

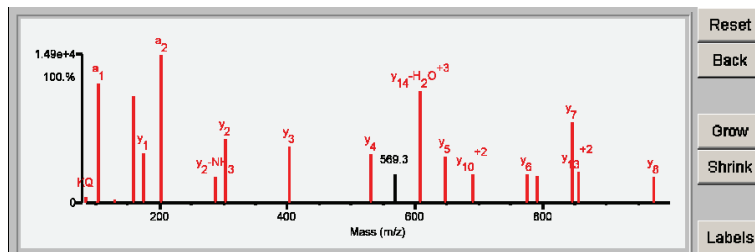

Result Summary

| Rank | Score | SPI (%) | BCS | # Unmatched Ions | Variable sites                                               | Sequence  | MH <sup>+</sup> Calculated (Da) | MH <sup>+</sup> Error (Da) | MH <sup>+</sup> Error (ppm) | Protein MW/pl (Da) | Species | Accession #                                                     | Protein Name |
|------|-------|---------|-----|------------------|--------------------------------------------------------------|-----------|---------------------------------|----------------------------|-----------------------------|--------------------|---------|-----------------------------------------------------------------|--------------|
| 1    | 10.09 | 63.3    | 5   | 9/23             | K524k K526k (R)M V Q E A E k Y / k A E / D / E / V Q / R (E) | 1952.9382 | 228.1036                        | 8.1                        | 70052.6/5.48                | HUMAN              | P08107  | Heat shock 70 kDa protein 1 OS=Homo sapiens GN=HSPA1A PE=1 SV=5 |              |

Detailed Results

| Rank | Score | SPI (%) | BCS | # Unmatched Ions | Variable sites                                               | Sequence  | MH <sup>+</sup> Calculated (Da) | MH <sup>+</sup> Error (Da) | MH <sup>+</sup> Error (ppm) | Protein MW/pl (Da) | Species | Accession # | MS-Digest Index #                                               | Protein Name |
|------|-------|---------|-----|------------------|--------------------------------------------------------------|-----------|---------------------------------|----------------------------|-----------------------------|--------------------|---------|-------------|-----------------------------------------------------------------|--------------|
| 1    | 10.09 | 63.3    | 5   | 9/23             | K524k K526k (R)M V Q E A E k Y / k A E / D / E / V Q / R (E) | 1952.9382 | 228.1036                        | 8.1                        | 70052.6/5.48                | HUMAN              | P08107  | 300447      | Heat shock 70 kDa protein 1 OS=Homo sapiens GN=HSPA1A PE=1 SV=5 |              |

| Fragment-ion (m/z)      | 70.067 | 72.082 | 84.043 | 84.080 | 86.095 | 104.053        | 141.103 | 158.099                         | 175.113        | 203.119        | 211.110 | 228.135 | 240.093 | 329.136 | 360.676 <sup>+2</sup> | 371.177 <sup>+2</sup> | 402.238        | 441.221 | 531.274        | 633.961 | 646.301        | 740.368        | 1088.526 |  |
|-------------------------|--------|--------|--------|--------|--------|----------------|---------|---------------------------------|----------------|----------------|---------|---------|---------|---------|-----------------------|-----------------------|----------------|---------|----------------|---------|----------------|----------------|----------|--|
| Frac. Inten. (% of TIC) | 0.00   | 0.28   | 0.18   | 0.50   | 4.10   | 5.49           | 5.49    | 11.26                           | 4.79           | 14.09          | 3.60    | 3.59    | 3.75    | 3.63    | 3.33                  | 3.74                  | 6.19           | 5.08    | 5.55           | 3.92    | 4.25           | 3.69           | 3.47     |  |
| Rel. Inten. (% of BP)   | 0.03   | 2.01   | 1.31   | 3.56   | 29.08  | 38.96          | 38.96   | 79.88                           | 34.00          | 100.00         | 25.56   | 25.49   | 26.63   | 25.78   | 23.67                 | 26.58                 | 43.91          | 36.07   | 39.39          | 27.82   | 30.17          | 26.21          | 24.66    |  |
| Score                   | 0.20   | 0.50   | 1.00   | 0.50   | -0.29  | 0.50           | -0.39   | 0.50                            | 1.50           | 0.50           | -0.26   | 0.75    | -0.27   | 0.75    | -0.24                 | -0.27                 | 1.50           | -0.36   | 1.50           | 1.50    | 1.50           | -0.26          | 1.50     |  |
| Ion-type                | PR     | V      | E      | KQ     |        | a <sub>1</sub> |         | y <sub>1</sub> -NH <sub>3</sub> | y <sub>1</sub> | a <sub>2</sub> |         | VQ      |         | QEA     |                       |                       | y <sub>3</sub> |         | a <sub>5</sub> |         | y <sub>5</sub> | y <sub>8</sub> |          |  |
| Delta ppm               | 23.9   | 15.6   | -11.8  | -10.4  |        | -9.1           |         | 38.6                            | -34.0          | -18.0          |         | -0.7    |         | -32.4   |                       |                       | -19.5          |         | 26.1           |         | -23.2          | -6.8           |          |  |
|                         |        |        |        |        |        |                |         |                                 |                |                |         |         |         |         |                       |                       |                |         |                |         |                |                |          |  |

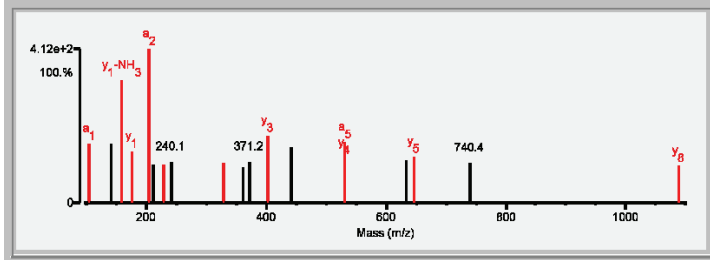

Reset

Back

Grow

Shrink

Labels

Result Summary

| Rank | Score | SPI (%) | BCS | # Unmatched Ions | Variable sites | Sequence                                                                         | MH <sup>+</sup> Calculated (Da) | MH <sup>+</sup> Error (Da) | MH <sup>+</sup> Error (ppm) | Protein MW/PI (Da) | Species | Accession #            | Protein Name                                                                                   |
|------|-------|---------|-----|------------------|----------------|----------------------------------------------------------------------------------|---------------------------------|----------------------------|-----------------------------|--------------------|---------|------------------------|------------------------------------------------------------------------------------------------|
| 1    | 11.78 | 79.3    | 6   | 7/24             | K524k          | (R)M <b>VQ</b> EA <b>ky</b> KA <b>ED</b> EVQR(E)                                 | 1952.9382                       | 114.0604                   | 8.4                         | 70052.6/5.48       | HUMAN   | <a href="#">P08107</a> | Heat shock 70 kDa protein 1 OS=Homo sapiens GN=HSPA1A PE=1 SV=5                                |
| 1    | 11.78 | 79.3    | 6   | 7/24             | K526k          | (R)M <b>VQ</b> EA <b>ky</b> KA <b>ED</b> EVQR(E)                                 | 1952.9382                       | 114.0604                   | 8.4                         | 70052.6/5.48       | HUMAN   | <a href="#">P08107</a> | Heat shock 70 kDa protein 1 OS=Homo sapiens GN=HSPA1A PE=1 SV=5                                |
| 2    | 6.53  | 57.2    | 3   | 11/24            | M61m           | (K)T <b>ED</b> KV <b>R</b> VM <b>AD</b> S <b>m</b> Q <b>E</b> K <b>Q</b> R(M)    | 2051.0008                       | 15.9977                    | 1.4                         | 43262.5/5.69       | HUMAN   | <a href="#">P49662</a> | Caspase-4 OS=Homo sapiens GN=CASP4 PE=1 SV=1                                                   |
| 3    | 4.64  | 59.2    | 2   | 11/24            | None           | (-)M <b>V</b> AD <b>IK</b> G <b>NE</b> Q <b>IK</b> E <b>Y</b> SW <b>R</b> (E)    | 2067.0328                       | -0.0342                    | -16.6                       | 22529.6/5.27       | HUMAN   | <a href="#">Q8N1N2</a> | Uncharacterized protein C18orf26 OS=Homo sapiens GN=C18orf26 PE=2 SV=1                         |
| 4    | 3.91  | 51.3    | 2   | 12/24            | None           | (-)M <b>V</b> RF <b>G</b> DE <b>L</b> GG <b>R</b> Y <b>GG</b> PG <b>GG</b> ER(A) | 2066.9825                       | 0.0161                     | 7.8                         | 262497.7/8.78      | HUMAN   | <a href="#">Q00975</a> | Voltage-dependent N-type calcium channel subunit alpha-1B OS=Homo sapiens GN=CACNA1B PE=1 SV=1 |

Detailed Results

| Rank                                                                                                                                                                                                                                                                                                                                                                                                                                                                                                                                                                                                                                                                                                                                                                                                                                                                                                                                                                                                                                                                                                                                                                                                                                                                                                                                                                                                                                                                                                                                                                                                                                                                                                                                                                                                                                                                                                                                                                                                                                                                                                                                                                                                                                                                                                                                                                                                       | Score  | SPI (%) | BCS    | # Unmatched Ions | Variable sites | Sequence                                                                                         | MH <sup>+</sup> Calculated (Da) | MH <sup>+</sup> Error (Da) | MH <sup>+</sup> Error (ppm) | Protein MW/PI (Da) | Species | Accession #            | MS-Digest Index #      | Protein Name                                                    |                    |         |                      |         |         |         |         |                      |                      |         |         |         |         |         |         |         |         |         |         |         |         |         |                      |                      |         |                         |      |      |      |      |      |      |      |      |      |      |      |      |      |      |      |      |      |      |      |      |      |       |      |      |                       |       |      |      |      |      |      |       |      |       |       |       |       |       |       |       |       |       |       |       |       |       |        |       |       |       |       |      |      |      |      |      |      |       |       |      |      |      |       |      |      |      |       |      |       |      |      |     |       |      |          |   |   |    |    |   |    |     |  |        |    |    |    |    |    |    |    |                      |  |  |  |  |  |  |  |           |  |      |       |  |       |       |       |  |  |  |      |      |       |  |      |       |      |  |  |  |  |  |  |  |
|------------------------------------------------------------------------------------------------------------------------------------------------------------------------------------------------------------------------------------------------------------------------------------------------------------------------------------------------------------------------------------------------------------------------------------------------------------------------------------------------------------------------------------------------------------------------------------------------------------------------------------------------------------------------------------------------------------------------------------------------------------------------------------------------------------------------------------------------------------------------------------------------------------------------------------------------------------------------------------------------------------------------------------------------------------------------------------------------------------------------------------------------------------------------------------------------------------------------------------------------------------------------------------------------------------------------------------------------------------------------------------------------------------------------------------------------------------------------------------------------------------------------------------------------------------------------------------------------------------------------------------------------------------------------------------------------------------------------------------------------------------------------------------------------------------------------------------------------------------------------------------------------------------------------------------------------------------------------------------------------------------------------------------------------------------------------------------------------------------------------------------------------------------------------------------------------------------------------------------------------------------------------------------------------------------------------------------------------------------------------------------------------------------|--------|---------|--------|------------------|----------------|--------------------------------------------------------------------------------------------------|---------------------------------|----------------------------|-----------------------------|--------------------|---------|------------------------|------------------------|-----------------------------------------------------------------|--------------------|---------|----------------------|---------|---------|---------|---------|----------------------|----------------------|---------|---------|---------|---------|---------|---------|---------|---------|---------|---------|---------|---------|---------|----------------------|----------------------|---------|-------------------------|------|------|------|------|------|------|------|------|------|------|------|------|------|------|------|------|------|------|------|------|------|-------|------|------|-----------------------|-------|------|------|------|------|------|-------|------|-------|-------|-------|-------|-------|-------|-------|-------|-------|-------|-------|-------|-------|--------|-------|-------|-------|-------|------|------|------|------|------|------|-------|-------|------|------|------|-------|------|------|------|-------|------|-------|------|------|-----|-------|------|----------|---|---|----|----|---|----|-----|--|--------|----|----|----|----|----|----|----|----------------------|--|--|--|--|--|--|--|-----------|--|------|-------|--|-------|-------|-------|--|--|--|------|------|-------|--|------|-------|------|--|--|--|--|--|--|--|
| 1                                                                                                                                                                                                                                                                                                                                                                                                                                                                                                                                                                                                                                                                                                                                                                                                                                                                                                                                                                                                                                                                                                                                                                                                                                                                                                                                                                                                                                                                                                                                                                                                                                                                                                                                                                                                                                                                                                                                                                                                                                                                                                                                                                                                                                                                                                                                                                                                          | 11.78  | 79.3    | 6      | 7/24             | K524k          | (R)M <b>V</b> Q <b>E</b> A <b>E</b> K <b>Y</b> K <b>A</b> E <b>D</b> /E <b>V</b> /Q <b>R</b> (E) | 1952.9382                       | 114.0604                   | 8.4                         | 70052.6/5.48       | HUMAN   | <a href="#">P08107</a> | <a href="#">300447</a> | Heat shock 70 kDa protein 1 OS=Homo sapiens GN=HSPA1A PE=1 SV=5 |                    |         |                      |         |         |         |         |                      |                      |         |         |         |         |         |         |         |         |         |         |         |         |         |                      |                      |         |                         |      |      |      |      |      |      |      |      |      |      |      |      |      |      |      |      |      |      |      |      |      |       |      |      |                       |       |      |      |      |      |      |       |      |       |       |       |       |       |       |       |       |       |       |       |       |       |        |       |       |       |       |      |      |      |      |      |      |       |       |      |      |      |       |      |      |      |       |      |       |      |      |     |       |      |          |   |   |    |    |   |    |     |  |        |    |    |    |    |    |    |    |                      |  |  |  |  |  |  |  |           |  |      |       |  |       |       |       |  |  |  |      |      |       |  |      |       |      |  |  |  |  |  |  |  |
| <table border="1"> <thead> <tr> <th>Fragment-Ion (m/z)</th> <th>61.009</th> <th>72.080</th> <th>84.043</th> <th>84.079</th> <th>101.071</th> <th>102.053</th> <th>104.051</th> <th>129.101</th> <th>155.079</th> <th>155.117</th> <th>158.098</th> <th>175.118</th> <th>203.119</th> <th>224.101</th> <th>231.115</th> <th>258.107</th> <th>303.176</th> <th>314.166</th> <th>402.244</th> <th>460.281</th> <th>531.305</th> <th>606.964<sup>+</sup></th> <th>609.628<sup>+</sup></th> <th>846.408</th> </tr> </thead> <tbody> <tr> <td>Frac. Inten. (% of TIC)</td> <td>3.58</td> <td>0.52</td> <td>0.17</td> <td>0.45</td> <td>0.16</td> <td>0.27</td> <td>9.91</td> <td>0.24</td> <td>2.47</td> <td>3.74</td> <td>6.03</td> <td>6.41</td> <td>9.63</td> <td>2.41</td> <td>4.82</td> <td>2.85</td> <td>7.93</td> <td>2.71</td> <td>5.74</td> <td>3.11</td> <td>2.82</td> <td>17.72</td> <td>2.73</td> <td>3.60</td> </tr> <tr> <td>Rel. Inten. (% of BP)</td> <td>20.22</td> <td>2.93</td> <td>0.98</td> <td>2.52</td> <td>0.88</td> <td>1.50</td> <td>55.97</td> <td>1.35</td> <td>13.92</td> <td>21.11</td> <td>34.02</td> <td>36.16</td> <td>54.35</td> <td>13.99</td> <td>27.22</td> <td>16.08</td> <td>44.75</td> <td>15.30</td> <td>32.43</td> <td>17.55</td> <td>15.89</td> <td>100.00</td> <td>15.42</td> <td>20.34</td> </tr> <tr> <td>Score</td> <td>-0.20</td> <td>0.50</td> <td>0.50</td> <td>0.50</td> <td>1.00</td> <td>0.50</td> <td>0.20</td> <td>-0.14</td> <td>-0.21</td> <td>0.50</td> <td>1.50</td> <td>0.50</td> <td>-0.14</td> <td>0.50</td> <td>0.75</td> <td>1.50</td> <td>-0.15</td> <td>1.50</td> <td>-0.18</td> <td>1.50</td> <td>0.50</td> <td>8.0</td> <td>-0.15</td> <td>1.50</td> </tr> <tr> <td>Ion-type</td> <td>V</td> <td>E</td> <td>KQ</td> <td>KQ</td> <td>E</td> <td>a1</td> <td>RKQ</td> <td></td> <td>y1-NH3</td> <td>y1</td> <td>a2</td> <td>b2</td> <td>QE</td> <td>y2</td> <td>y3</td> <td>y4</td> <td>y14-H2O<sup>+</sup></td> <td></td> <td></td> <td></td> <td></td> <td></td> <td></td> <td></td> </tr> <tr> <td>Delta ppm</td> <td></td> <td>-5.2</td> <td>-17.5</td> <td></td> <td>-20.1</td> <td>-27.3</td> <td>-12.7</td> <td></td> <td></td> <td></td> <td>37.9</td> <td>-6.6</td> <td>-16.5</td> <td></td> <td>-9.8</td> <td>-11.0</td> <td>-4.4</td> <td></td> <td></td> <td></td> <td></td> <td></td> <td></td> <td></td> </tr> </tbody> </table> |        |         |        |                  |                |                                                                                                  |                                 |                            |                             |                    |         |                        |                        |                                                                 | Fragment-Ion (m/z) | 61.009  | 72.080               | 84.043  | 84.079  | 101.071 | 102.053 | 104.051              | 129.101              | 155.079 | 155.117 | 158.098 | 175.118 | 203.119 | 224.101 | 231.115 | 258.107 | 303.176 | 314.166 | 402.244 | 460.281 | 531.305 | 606.964 <sup>+</sup> | 609.628 <sup>+</sup> | 846.408 | Frac. Inten. (% of TIC) | 3.58 | 0.52 | 0.17 | 0.45 | 0.16 | 0.27 | 9.91 | 0.24 | 2.47 | 3.74 | 6.03 | 6.41 | 9.63 | 2.41 | 4.82 | 2.85 | 7.93 | 2.71 | 5.74 | 3.11 | 2.82 | 17.72 | 2.73 | 3.60 | Rel. Inten. (% of BP) | 20.22 | 2.93 | 0.98 | 2.52 | 0.88 | 1.50 | 55.97 | 1.35 | 13.92 | 21.11 | 34.02 | 36.16 | 54.35 | 13.99 | 27.22 | 16.08 | 44.75 | 15.30 | 32.43 | 17.55 | 15.89 | 100.00 | 15.42 | 20.34 | Score | -0.20 | 0.50 | 0.50 | 0.50 | 1.00 | 0.50 | 0.20 | -0.14 | -0.21 | 0.50 | 1.50 | 0.50 | -0.14 | 0.50 | 0.75 | 1.50 | -0.15 | 1.50 | -0.18 | 1.50 | 0.50 | 8.0 | -0.15 | 1.50 | Ion-type | V | E | KQ | KQ | E | a1 | RKQ |  | y1-NH3 | y1 | a2 | b2 | QE | y2 | y3 | y4 | y14-H2O <sup>+</sup> |  |  |  |  |  |  |  | Delta ppm |  | -5.2 | -17.5 |  | -20.1 | -27.3 | -12.7 |  |  |  | 37.9 | -6.6 | -16.5 |  | -9.8 | -11.0 | -4.4 |  |  |  |  |  |  |  |
| Fragment-Ion (m/z)                                                                                                                                                                                                                                                                                                                                                                                                                                                                                                                                                                                                                                                                                                                                                                                                                                                                                                                                                                                                                                                                                                                                                                                                                                                                                                                                                                                                                                                                                                                                                                                                                                                                                                                                                                                                                                                                                                                                                                                                                                                                                                                                                                                                                                                                                                                                                                                         | 61.009 | 72.080  | 84.043 | 84.079           | 101.071        | 102.053                                                                                          | 104.051                         | 129.101                    | 155.079                     | 155.117            | 158.098 | 175.118                | 203.119                | 224.101                                                         | 231.115            | 258.107 | 303.176              | 314.166 | 402.244 | 460.281 | 531.305 | 606.964 <sup>+</sup> | 609.628 <sup>+</sup> | 846.408 |         |         |         |         |         |         |         |         |         |         |         |         |                      |                      |         |                         |      |      |      |      |      |      |      |      |      |      |      |      |      |      |      |      |      |      |      |      |      |       |      |      |                       |       |      |      |      |      |      |       |      |       |       |       |       |       |       |       |       |       |       |       |       |       |        |       |       |       |       |      |      |      |      |      |      |       |       |      |      |      |       |      |      |      |       |      |       |      |      |     |       |      |          |   |   |    |    |   |    |     |  |        |    |    |    |    |    |    |    |                      |  |  |  |  |  |  |  |           |  |      |       |  |       |       |       |  |  |  |      |      |       |  |      |       |      |  |  |  |  |  |  |  |
| Frac. Inten. (% of TIC)                                                                                                                                                                                                                                                                                                                                                                                                                                                                                                                                                                                                                                                                                                                                                                                                                                                                                                                                                                                                                                                                                                                                                                                                                                                                                                                                                                                                                                                                                                                                                                                                                                                                                                                                                                                                                                                                                                                                                                                                                                                                                                                                                                                                                                                                                                                                                                                    | 3.58   | 0.52    | 0.17   | 0.45             | 0.16           | 0.27                                                                                             | 9.91                            | 0.24                       | 2.47                        | 3.74               | 6.03    | 6.41                   | 9.63                   | 2.41                                                            | 4.82               | 2.85    | 7.93                 | 2.71    | 5.74    | 3.11    | 2.82    | 17.72                | 2.73                 | 3.60    |         |         |         |         |         |         |         |         |         |         |         |         |                      |                      |         |                         |      |      |      |      |      |      |      |      |      |      |      |      |      |      |      |      |      |      |      |      |      |       |      |      |                       |       |      |      |      |      |      |       |      |       |       |       |       |       |       |       |       |       |       |       |       |       |        |       |       |       |       |      |      |      |      |      |      |       |       |      |      |      |       |      |      |      |       |      |       |      |      |     |       |      |          |   |   |    |    |   |    |     |  |        |    |    |    |    |    |    |    |                      |  |  |  |  |  |  |  |           |  |      |       |  |       |       |       |  |  |  |      |      |       |  |      |       |      |  |  |  |  |  |  |  |
| Rel. Inten. (% of BP)                                                                                                                                                                                                                                                                                                                                                                                                                                                                                                                                                                                                                                                                                                                                                                                                                                                                                                                                                                                                                                                                                                                                                                                                                                                                                                                                                                                                                                                                                                                                                                                                                                                                                                                                                                                                                                                                                                                                                                                                                                                                                                                                                                                                                                                                                                                                                                                      | 20.22  | 2.93    | 0.98   | 2.52             | 0.88           | 1.50                                                                                             | 55.97                           | 1.35                       | 13.92                       | 21.11              | 34.02   | 36.16                  | 54.35                  | 13.99                                                           | 27.22              | 16.08   | 44.75                | 15.30   | 32.43   | 17.55   | 15.89   | 100.00               | 15.42                | 20.34   |         |         |         |         |         |         |         |         |         |         |         |         |                      |                      |         |                         |      |      |      |      |      |      |      |      |      |      |      |      |      |      |      |      |      |      |      |      |      |       |      |      |                       |       |      |      |      |      |      |       |      |       |       |       |       |       |       |       |       |       |       |       |       |       |        |       |       |       |       |      |      |      |      |      |      |       |       |      |      |      |       |      |      |      |       |      |       |      |      |     |       |      |          |   |   |    |    |   |    |     |  |        |    |    |    |    |    |    |    |                      |  |  |  |  |  |  |  |           |  |      |       |  |       |       |       |  |  |  |      |      |       |  |      |       |      |  |  |  |  |  |  |  |
| Score                                                                                                                                                                                                                                                                                                                                                                                                                                                                                                                                                                                                                                                                                                                                                                                                                                                                                                                                                                                                                                                                                                                                                                                                                                                                                                                                                                                                                                                                                                                                                                                                                                                                                                                                                                                                                                                                                                                                                                                                                                                                                                                                                                                                                                                                                                                                                                                                      | -0.20  | 0.50    | 0.50   | 0.50             | 1.00           | 0.50                                                                                             | 0.20                            | -0.14                      | -0.21                       | 0.50               | 1.50    | 0.50                   | -0.14                  | 0.50                                                            | 0.75               | 1.50    | -0.15                | 1.50    | -0.18   | 1.50    | 0.50    | 8.0                  | -0.15                | 1.50    |         |         |         |         |         |         |         |         |         |         |         |         |                      |                      |         |                         |      |      |      |      |      |      |      |      |      |      |      |      |      |      |      |      |      |      |      |      |      |       |      |      |                       |       |      |      |      |      |      |       |      |       |       |       |       |       |       |       |       |       |       |       |       |       |        |       |       |       |       |      |      |      |      |      |      |       |       |      |      |      |       |      |      |      |       |      |       |      |      |     |       |      |          |   |   |    |    |   |    |     |  |        |    |    |    |    |    |    |    |                      |  |  |  |  |  |  |  |           |  |      |       |  |       |       |       |  |  |  |      |      |       |  |      |       |      |  |  |  |  |  |  |  |
| Ion-type                                                                                                                                                                                                                                                                                                                                                                                                                                                                                                                                                                                                                                                                                                                                                                                                                                                                                                                                                                                                                                                                                                                                                                                                                                                                                                                                                                                                                                                                                                                                                                                                                                                                                                                                                                                                                                                                                                                                                                                                                                                                                                                                                                                                                                                                                                                                                                                                   | V      | E       | KQ     | KQ               | E              | a1                                                                                               | RKQ                             |                            | y1-NH3                      | y1                 | a2      | b2                     | QE                     | y2                                                              | y3                 | y4      | y14-H2O <sup>+</sup> |         |         |         |         |                      |                      |         |         |         |         |         |         |         |         |         |         |         |         |         |                      |                      |         |                         |      |      |      |      |      |      |      |      |      |      |      |      |      |      |      |      |      |      |      |      |      |       |      |      |                       |       |      |      |      |      |      |       |      |       |       |       |       |       |       |       |       |       |       |       |       |       |        |       |       |       |       |      |      |      |      |      |      |       |       |      |      |      |       |      |      |      |       |      |       |      |      |     |       |      |          |   |   |    |    |   |    |     |  |        |    |    |    |    |    |    |    |                      |  |  |  |  |  |  |  |           |  |      |       |  |       |       |       |  |  |  |      |      |       |  |      |       |      |  |  |  |  |  |  |  |
| Delta ppm                                                                                                                                                                                                                                                                                                                                                                                                                                                                                                                                                                                                                                                                                                                                                                                                                                                                                                                                                                                                                                                                                                                                                                                                                                                                                                                                                                                                                                                                                                                                                                                                                                                                                                                                                                                                                                                                                                                                                                                                                                                                                                                                                                                                                                                                                                                                                                                                  |        | -5.2    | -17.5  |                  | -20.1          | -27.3                                                                                            | -12.7                           |                            |                             |                    | 37.9    | -6.6                   | -16.5                  |                                                                 | -9.8               | -11.0   | -4.4                 |         |         |         |         |                      |                      |         |         |         |         |         |         |         |         |         |         |         |         |         |                      |                      |         |                         |      |      |      |      |      |      |      |      |      |      |      |      |      |      |      |      |      |      |      |      |      |       |      |      |                       |       |      |      |      |      |      |       |      |       |       |       |       |       |       |       |       |       |       |       |       |       |        |       |       |       |       |      |      |      |      |      |      |       |       |      |      |      |       |      |      |      |       |      |       |      |      |     |       |      |          |   |   |    |    |   |    |     |  |        |    |    |    |    |    |    |    |                      |  |  |  |  |  |  |  |           |  |      |       |  |       |       |       |  |  |  |      |      |       |  |      |       |      |  |  |  |  |  |  |  |

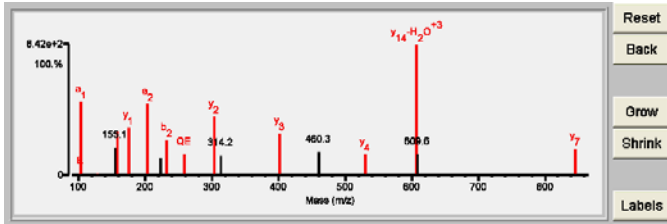

Reset

Back

Grow

Shrink

Labels

Result Summary

| Rank | Score | SPI (%) | BCS | # Unmatched Ions | Variable sites | Sequence                                       | MH <sup>+</sup> Calculated (Da) | MH <sup>+</sup> Error (Da) | MH <sup>+</sup> Error (ppm) | Protein MW/PI (Da) | Species | Accession # | Protein Name                                                    |
|------|-------|---------|-----|------------------|----------------|------------------------------------------------|---------------------------------|----------------------------|-----------------------------|--------------------|---------|-------------|-----------------------------------------------------------------|
| 1    | 10.21 | 60.3    | 7   | 11/25            | K550k          | (K)N A L E S Y A F N M K S A V E D E G L K (G) | 2216.0540                       | 114.0721                   | 12.5                        | 70052.6/5.48       | HUMAN   | P08107      | Heat shock 70 kDa protein 1 OS=Homo sapiens GN=HSPA1A PE=1 SV=5 |

Detailed Results

| Rank                   | Score  | SPI (%) | BCS    | # Unmatched Ions | Variable sites | Sequence                                       | MH <sup>+</sup> Calculated (Da) | MH <sup>+</sup> Error (Da) | MH <sup>+</sup> Error (ppm) | Protein MW/PI (Da) | Species | Accession # | MS-Digest Index # | Protein Name                                                    |         |                       |                       |         |                       |                        |                        |                        |          |                        |                        |
|------------------------|--------|---------|--------|------------------|----------------|------------------------------------------------|---------------------------------|----------------------------|-----------------------------|--------------------|---------|-------------|-------------------|-----------------------------------------------------------------|---------|-----------------------|-----------------------|---------|-----------------------|------------------------|------------------------|------------------------|----------|------------------------|------------------------|
| 1                      | 10.21  | 60.3    | 7      | 11/25            | K550k          | (K)N A L E S Y A F N M K S A V E D E G L K (G) | 2216.0540                       | 114.0721                   | 12.5                        | 70052.6/5.48       | HUMAN   | P08107      | 300447            | Heat shock 70 kDa protein 1 OS=Homo sapiens GN=HSPA1A PE=1 SV=5 |         |                       |                       |         |                       |                        |                        |                        |          |                        |                        |
| Fragment-ion (m/z)     | 84.078 | 86.095  | 88.038 | 99.059           | 158.091        | 186.084                                        | 250.121                         | 278.113                    | 299.175                     | 362.122            | 393.137 | 423.260     | 446.253           | 583.273                                                         | 690.327 | 791.376 <sup>+2</sup> | 911.999 <sup>+2</sup> | 947.466 | 951.948 <sup>+2</sup> | 1007.496 <sup>+2</sup> | 1016.472 <sup>+2</sup> | 1017.069 <sup>+2</sup> | 1025.524 | 1073.014 <sup>+2</sup> | 1112.580 <sup>+2</sup> |
| Frac. Inten.(% of TIC) | 0.09   | 0.29    | 3.93   | 2.70             | 5.04           | 4.42                                           | 6.05                            | 4.81                       | 4.41                        | 2.64               | 2.59    | 4.53        | 3.94              | 2.74                                                            | 3.90    | 4.33                  | 3.08                  | 7.52    | 10.57                 | 2.76                   | 4.60                   | 2.73                   | 3.78     | 5.70                   | 2.87                   |
| Rel. Inten.(% of BP)   | 0.86   | 2.76    | 37.21  | 25.55            | 47.68          | 41.90                                          | 57.29                           | 45.50                      | 41.76                       | 24.98              | 24.51   | 42.86       | 37.25             | 25.93                                                           | 36.88   | 41.01                 | 29.11                 | 71.13   | 100.00                | 26.15                  | 43.55                  | 25.80                  | 35.76    | 53.94                  | 27.16                  |
| Score                  | 0.50   | 0.22    | -0.37  | -0.26            | 0.50           | 0.50                                           | -0.57                           | -0.46                      | 0.50                        | -0.25              | -0.25   | -0.43       | 1.50              | 0.75                                                            | 1.50    | 1.50                  | -0.29                 | 1.50    | 1.50                  | 0.50                   | 1.50                   | -0.26                  | -0.36    | 1.50                   | -0.27                  |
| Ion-type               | KQ     | LI      |        |                  | a2             | b2                                             |                                 |                            | b3                          |                    |         | y4          | SYAFN             | y6                                                              |         | y13 <sup>+2</sup>     |                       | y9      | y16 <sup>+2</sup>     | y17-H2O <sup>+2</sup>  | y17 <sup>+2</sup>      |                        |          | y18 <sup>+2</sup>      |                        |
| Delta ppm              | -35.4  | -18.9   |        |                  | -11.4          | -16.2                                          |                                 |                            | 11.8                        |                    |         | -18.4       | 37.9              | -5.0                                                            |         | -8.4                  |                       | -2.3    | -1.1                  | 31.2                   | 2.3                    |                        |          | 1.4                    |                        |

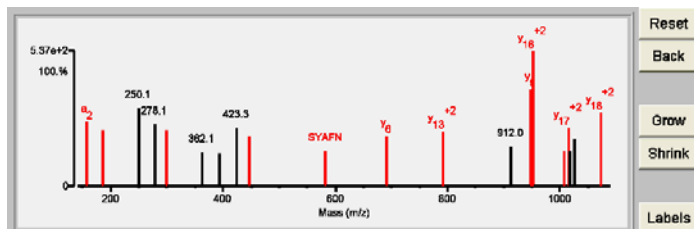

Result Summary

| Rank | Score | SPI (%) | BCS | # Unmatched Ions | Variable sites | Sequence                                | MH <sup>+</sup> Calculated (Da) | MH <sup>+</sup> Error (Da) | MH <sup>+</sup> Error (ppm) | Protein MW/pI (Da) | Species | Accession # | Protein Name                                                                      |
|------|-------|---------|-----|------------------|----------------|-----------------------------------------|---------------------------------|----------------------------|-----------------------------|--------------------|---------|-------------|-----------------------------------------------------------------------------------|
| 1    | 22.54 | 97.1    | 15  | 1/25             | K597k          | (K)RKELEQVCNPIISGLYQAGGPGGGFQAQGP(K)(G) | 3339.6903                       | 114.0591                   | 4.7                         | 70052.6/5.48       | HUMAN   | P08107      | Heat shock 70 kDa protein 1 OS=Homo sapiens GN=HSPA1A PE=1 SV=5                   |
| 2    | 8.37  | 54.1    | 5   | 14/25            | K628k          | (K)RKELEQVCNPIISGLYQAGGPGGGFQAQGP(K)(G) | 3339.6903                       | 114.0591                   | 4.7                         | 70052.6/5.48       | HUMAN   | P08107      | Heat shock 70 kDa protein 1 OS=Homo sapiens GN=HSPA1A PE=1 SV=5                   |
| 3    | 6.23  | 51.1    | 4   | 14/25            | K68k           | (K)IVDLKPDWVGKYSRKAALFLNRFEAK(R)        | 3339.7484                       | 114.0009                   | -12.2                       | 62639.6/6.40       | HUMAN   | P31948      | Stress-induced-phosphoprotein 1 OS=Homo sapiens GN=STIP1 PE=1 SV=1                |
| 4    | 3.86  | 53.9    | 3   | 15/25            | K397k K413k    | (K)DTTNNAIKYQLDIEKMEYNDGKR(K)(C)        | 3225.6209                       | 228.1285                   | 12.4                        | 97776.4/6.67       | HUMAN   | RQ9UKW4     | REVERSE Guanine nucleotide exchange factor VAV3 OS=Homo sapiens GN=VAV3 PE=1 SV=1 |
| 4    | 3.86  | 53.9    | 3   | 15/25            | K397k K415k    | (K)DTTNNAIKYQLDIEKMEYNDGKR(K)(C)        | 3225.6209                       | 228.1285                   | 12.4                        | 97776.4/6.67       | HUMAN   | RQ9UKW4     | REVERSE Guanine nucleotide exchange factor VAV3 OS=Homo sapiens GN=VAV3 PE=1 SV=1 |

Detailed Results

| Rank                                                                                                                                                                                                                                                                                                                                                                                                                                                                                                                                                                                                                                                                                                                                                                                                                                                                                                                                                                                                                                                                                                                                                                                                                                                                                                                                                                                                                                                                                                                                                                                                                                                                                                                                                                                                                                                                                                                                                                                                                                                                                                                                                                                                                                                                                                                                                                                                                                                                                                                                                                                                                                                                                                                                                                                                                                                                                                                                                                                              | Score  | SPI (%) | BCS     | # Unmatched Ions | Variable sites        | Sequence                                                             | MH <sup>+</sup> Calculated (Da) | MH <sup>+</sup> Error (Da) | MH <sup>+</sup> Error (ppm) | Protein MW/pI (Da)    | Species               | Accession #           | MS-Digest Index #     | Protein Name                                                    |                       |         |                       |         |                        |                       |                        |                        |                        |                        |                       |                       |                       |                       |                       |                       |         |                       |         |                        |          |                        |                        |                        |                        |          |                         |      |      |      |      |      |      |       |      |      |      |      |      |      |      |      |      |      |      |      |      |      |      |      |      |      |                       |      |      |      |       |       |      |        |       |       |       |      |       |       |       |       |       |       |      |       |       |       |       |       |       |       |      |       |      |      |      |      |      |      |      |      |      |      |      |      |      |      |      |      |      |      |      |      |      |      |      |      |      |      |          |    |    |   |    |                   |                   |                   |    |                   |                   |                   |                   |                   |                   |                   |     |                   |     |                   |     |                   |                   |                       |                   |    |           |       |       |      |     |      |     |     |       |     |      |     |     |      |     |      |      |      |     |      |      |      |      |      |     |     |
|---------------------------------------------------------------------------------------------------------------------------------------------------------------------------------------------------------------------------------------------------------------------------------------------------------------------------------------------------------------------------------------------------------------------------------------------------------------------------------------------------------------------------------------------------------------------------------------------------------------------------------------------------------------------------------------------------------------------------------------------------------------------------------------------------------------------------------------------------------------------------------------------------------------------------------------------------------------------------------------------------------------------------------------------------------------------------------------------------------------------------------------------------------------------------------------------------------------------------------------------------------------------------------------------------------------------------------------------------------------------------------------------------------------------------------------------------------------------------------------------------------------------------------------------------------------------------------------------------------------------------------------------------------------------------------------------------------------------------------------------------------------------------------------------------------------------------------------------------------------------------------------------------------------------------------------------------------------------------------------------------------------------------------------------------------------------------------------------------------------------------------------------------------------------------------------------------------------------------------------------------------------------------------------------------------------------------------------------------------------------------------------------------------------------------------------------------------------------------------------------------------------------------------------------------------------------------------------------------------------------------------------------------------------------------------------------------------------------------------------------------------------------------------------------------------------------------------------------------------------------------------------------------------------------------------------------------------------------------------------------------|--------|---------|---------|------------------|-----------------------|----------------------------------------------------------------------|---------------------------------|----------------------------|-----------------------------|-----------------------|-----------------------|-----------------------|-----------------------|-----------------------------------------------------------------|-----------------------|---------|-----------------------|---------|------------------------|-----------------------|------------------------|------------------------|------------------------|------------------------|-----------------------|-----------------------|-----------------------|-----------------------|-----------------------|-----------------------|---------|-----------------------|---------|------------------------|----------|------------------------|------------------------|------------------------|------------------------|----------|-------------------------|------|------|------|------|------|------|-------|------|------|------|------|------|------|------|------|------|------|------|------|------|------|------|------|------|------|-----------------------|------|------|------|-------|-------|------|--------|-------|-------|-------|------|-------|-------|-------|-------|-------|-------|------|-------|-------|-------|-------|-------|-------|-------|------|-------|------|------|------|------|------|------|------|------|------|------|------|------|------|------|------|------|------|------|------|------|------|------|------|------|------|------|----------|----|----|---|----|-------------------|-------------------|-------------------|----|-------------------|-------------------|-------------------|-------------------|-------------------|-------------------|-------------------|-----|-------------------|-----|-------------------|-----|-------------------|-------------------|-----------------------|-------------------|----|-----------|-------|-------|------|-----|------|-----|-----|-------|-----|------|-----|-----|------|-----|------|------|------|-----|------|------|------|------|------|-----|-----|
| 1                                                                                                                                                                                                                                                                                                                                                                                                                                                                                                                                                                                                                                                                                                                                                                                                                                                                                                                                                                                                                                                                                                                                                                                                                                                                                                                                                                                                                                                                                                                                                                                                                                                                                                                                                                                                                                                                                                                                                                                                                                                                                                                                                                                                                                                                                                                                                                                                                                                                                                                                                                                                                                                                                                                                                                                                                                                                                                                                                                                                 | 22.54  | 97.1    | 15      | 1/25             | K597k                 | (K)R K E L E Q V C N P I I S G L Y Q A G G P G G G F Q A Q G P K (G) | 3339.6903                       | 114.0591                   | 4.7                         | 70052.6/5.48          | HUMAN                 | P08107                | 300447                | Heat shock 70 kDa protein 1 OS=Homo sapiens GN=HSPA1A PE=1 SV=5 |                       |         |                       |         |                        |                       |                        |                        |                        |                        |                       |                       |                       |                       |                       |                       |         |                       |         |                        |          |                        |                        |                        |                        |          |                         |      |      |      |      |      |      |       |      |      |      |      |      |      |      |      |      |      |      |      |      |      |      |      |      |      |                       |      |      |      |       |       |      |        |       |       |       |      |       |       |       |       |       |       |      |       |       |       |       |       |       |       |      |       |      |      |      |      |      |      |      |      |      |      |      |      |      |      |      |      |      |      |      |      |      |      |      |      |      |      |          |    |    |   |    |                   |                   |                   |    |                   |                   |                   |                   |                   |                   |                   |     |                   |     |                   |     |                   |                   |                       |                   |    |           |       |       |      |     |      |     |     |       |     |      |     |     |      |     |      |      |      |     |      |      |      |      |      |     |     |
| <table border="1"> <thead> <tr> <th>Fragment-Ion (m/z)</th> <th>70.064</th> <th>86.095</th> <th>136.074</th> <th>301.187</th> <th>458.237<sup>+2</sup></th> <th>486.752<sup>+2</sup></th> <th>535.277<sup>+2</sup></th> <th>557.298</th> <th>563.787<sup>+2</sup></th> <th>592.296<sup>+2</sup></th> <th>656.331<sup>+2</sup></th> <th>684.845<sup>+2</sup></th> <th>734.040<sup>+3</sup></th> <th>741.385<sup>+2</sup></th> <th>797.918<sup>+2</sup></th> <th>915.467</th> <th>926.488<sup>+2</sup></th> <th>972.495</th> <th>1008.014<sup>+2</sup></th> <th>1069.540</th> <th>1071.547<sup>+2</sup></th> <th>1164.585<sup>+2</sup></th> <th>1184.586<sup>+2</sup></th> <th>1193.111<sup>+2</sup></th> <th>1271.618</th> </tr> </thead> <tbody> <tr> <td>Frac. Inten. (% of TIC)</td> <td>0.01</td> <td>0.08</td> <td>0.12</td> <td>2.34</td> <td>8.53</td> <td>1.95</td> <td>22.34</td> <td>2.41</td> <td>7.55</td> <td>2.75</td> <td>1.90</td> <td>2.50</td> <td>2.73</td> <td>3.21</td> <td>3.81</td> <td>5.97</td> <td>8.10</td> <td>2.19</td> <td>2.32</td> <td>5.07</td> <td>2.90</td> <td>2.25</td> <td>4.03</td> <td>5.05</td> <td>1.91</td> </tr> <tr> <td>Rel. Inten. (% of BP)</td> <td>0.03</td> <td>0.34</td> <td>0.52</td> <td>10.47</td> <td>38.18</td> <td>8.74</td> <td>100.00</td> <td>10.77</td> <td>33.81</td> <td>12.33</td> <td>8.50</td> <td>11.17</td> <td>12.20</td> <td>14.37</td> <td>17.04</td> <td>26.72</td> <td>27.30</td> <td>9.82</td> <td>10.39</td> <td>22.68</td> <td>12.99</td> <td>-0.13</td> <td>10.09</td> <td>18.04</td> <td>22.62</td> <td>8.54</td> </tr> <tr> <td>Score</td> <td>0.20</td> <td>0.22</td> <td>1.00</td> <td>1.50</td> <td>1.50</td> <td>1.50</td> <td>1.50</td> <td>1.50</td> <td>1.50</td> <td>1.50</td> <td>1.50</td> <td>0.50</td> <td>0.50</td> <td>0.50</td> <td>0.50</td> <td>1.50</td> <td>0.50</td> <td>1.50</td> <td>0.50</td> <td>1.50</td> <td>1.50</td> <td>0.50</td> <td>0.50</td> <td>0.50</td> <td>0.50</td> <td>0.50</td> </tr> <tr> <td>Ion-type</td> <td>PR</td> <td>LI</td> <td>Y</td> <td>Y3</td> <td>Y10<sup>+2</sup></td> <td>Y11<sup>+2</sup></td> <td>Y12<sup>+2</sup></td> <td>Y6</td> <td>Y13<sup>+2</sup></td> <td>Y14<sup>+2</sup></td> <td>Y16<sup>+2</sup></td> <td>b10<sup>+2</sup></td> <td>b18<sup>+3</sup></td> <td>b11<sup>+2</sup></td> <td>b12<sup>+2</sup></td> <td>Y10</td> <td>b15<sup>+2</sup></td> <td>Y11</td> <td>b16<sup>+2</sup></td> <td>Y12</td> <td>b16<sup>+2</sup></td> <td>b20<sup>+2</sup></td> <td>b21-NH3<sup>+2</sup></td> <td>b21<sup>+2</sup></td> <td>b9</td> </tr> <tr> <td>Delta ppm</td> <td>-11.8</td> <td>-17.7</td> <td>-9.5</td> <td>0.2</td> <td>-1.1</td> <td>6.8</td> <td>3.6</td> <td>-10.9</td> <td>3.0</td> <td>-0.1</td> <td>8.2</td> <td>9.2</td> <td>-5.5</td> <td>5.6</td> <td>-5.4</td> <td>-2.0</td> <td>-4.1</td> <td>6.8</td> <td>-9.3</td> <td>-2.3</td> <td>-6.0</td> <td>-6.0</td> <td>-2.9</td> <td>6.2</td> <td>0.9</td> </tr> </tbody> </table> |        |         |         |                  |                       |                                                                      |                                 |                            |                             |                       |                       |                       |                       |                                                                 | Fragment-Ion (m/z)    | 70.064  | 86.095                | 136.074 | 301.187                | 458.237 <sup>+2</sup> | 486.752 <sup>+2</sup>  | 535.277 <sup>+2</sup>  | 557.298                | 563.787 <sup>+2</sup>  | 592.296 <sup>+2</sup> | 656.331 <sup>+2</sup> | 684.845 <sup>+2</sup> | 734.040 <sup>+3</sup> | 741.385 <sup>+2</sup> | 797.918 <sup>+2</sup> | 915.467 | 926.488 <sup>+2</sup> | 972.495 | 1008.014 <sup>+2</sup> | 1069.540 | 1071.547 <sup>+2</sup> | 1164.585 <sup>+2</sup> | 1184.586 <sup>+2</sup> | 1193.111 <sup>+2</sup> | 1271.618 | Frac. Inten. (% of TIC) | 0.01 | 0.08 | 0.12 | 2.34 | 8.53 | 1.95 | 22.34 | 2.41 | 7.55 | 2.75 | 1.90 | 2.50 | 2.73 | 3.21 | 3.81 | 5.97 | 8.10 | 2.19 | 2.32 | 5.07 | 2.90 | 2.25 | 4.03 | 5.05 | 1.91 | Rel. Inten. (% of BP) | 0.03 | 0.34 | 0.52 | 10.47 | 38.18 | 8.74 | 100.00 | 10.77 | 33.81 | 12.33 | 8.50 | 11.17 | 12.20 | 14.37 | 17.04 | 26.72 | 27.30 | 9.82 | 10.39 | 22.68 | 12.99 | -0.13 | 10.09 | 18.04 | 22.62 | 8.54 | Score | 0.20 | 0.22 | 1.00 | 1.50 | 1.50 | 1.50 | 1.50 | 1.50 | 1.50 | 1.50 | 1.50 | 0.50 | 0.50 | 0.50 | 0.50 | 1.50 | 0.50 | 1.50 | 0.50 | 1.50 | 1.50 | 0.50 | 0.50 | 0.50 | 0.50 | 0.50 | Ion-type | PR | LI | Y | Y3 | Y10 <sup>+2</sup> | Y11 <sup>+2</sup> | Y12 <sup>+2</sup> | Y6 | Y13 <sup>+2</sup> | Y14 <sup>+2</sup> | Y16 <sup>+2</sup> | b10 <sup>+2</sup> | b18 <sup>+3</sup> | b11 <sup>+2</sup> | b12 <sup>+2</sup> | Y10 | b15 <sup>+2</sup> | Y11 | b16 <sup>+2</sup> | Y12 | b16 <sup>+2</sup> | b20 <sup>+2</sup> | b21-NH3 <sup>+2</sup> | b21 <sup>+2</sup> | b9 | Delta ppm | -11.8 | -17.7 | -9.5 | 0.2 | -1.1 | 6.8 | 3.6 | -10.9 | 3.0 | -0.1 | 8.2 | 9.2 | -5.5 | 5.6 | -5.4 | -2.0 | -4.1 | 6.8 | -9.3 | -2.3 | -6.0 | -6.0 | -2.9 | 6.2 | 0.9 |
| Fragment-Ion (m/z)                                                                                                                                                                                                                                                                                                                                                                                                                                                                                                                                                                                                                                                                                                                                                                                                                                                                                                                                                                                                                                                                                                                                                                                                                                                                                                                                                                                                                                                                                                                                                                                                                                                                                                                                                                                                                                                                                                                                                                                                                                                                                                                                                                                                                                                                                                                                                                                                                                                                                                                                                                                                                                                                                                                                                                                                                                                                                                                                                                                | 70.064 | 86.095  | 136.074 | 301.187          | 458.237 <sup>+2</sup> | 486.752 <sup>+2</sup>                                                | 535.277 <sup>+2</sup>           | 557.298                    | 563.787 <sup>+2</sup>       | 592.296 <sup>+2</sup> | 656.331 <sup>+2</sup> | 684.845 <sup>+2</sup> | 734.040 <sup>+3</sup> | 741.385 <sup>+2</sup>                                           | 797.918 <sup>+2</sup> | 915.467 | 926.488 <sup>+2</sup> | 972.495 | 1008.014 <sup>+2</sup> | 1069.540              | 1071.547 <sup>+2</sup> | 1164.585 <sup>+2</sup> | 1184.586 <sup>+2</sup> | 1193.111 <sup>+2</sup> | 1271.618              |                       |                       |                       |                       |                       |         |                       |         |                        |          |                        |                        |                        |                        |          |                         |      |      |      |      |      |      |       |      |      |      |      |      |      |      |      |      |      |      |      |      |      |      |      |      |      |                       |      |      |      |       |       |      |        |       |       |       |      |       |       |       |       |       |       |      |       |       |       |       |       |       |       |      |       |      |      |      |      |      |      |      |      |      |      |      |      |      |      |      |      |      |      |      |      |      |      |      |      |      |      |          |    |    |   |    |                   |                   |                   |    |                   |                   |                   |                   |                   |                   |                   |     |                   |     |                   |     |                   |                   |                       |                   |    |           |       |       |      |     |      |     |     |       |     |      |     |     |      |     |      |      |      |     |      |      |      |      |      |     |     |
| Frac. Inten. (% of TIC)                                                                                                                                                                                                                                                                                                                                                                                                                                                                                                                                                                                                                                                                                                                                                                                                                                                                                                                                                                                                                                                                                                                                                                                                                                                                                                                                                                                                                                                                                                                                                                                                                                                                                                                                                                                                                                                                                                                                                                                                                                                                                                                                                                                                                                                                                                                                                                                                                                                                                                                                                                                                                                                                                                                                                                                                                                                                                                                                                                           | 0.01   | 0.08    | 0.12    | 2.34             | 8.53                  | 1.95                                                                 | 22.34                           | 2.41                       | 7.55                        | 2.75                  | 1.90                  | 2.50                  | 2.73                  | 3.21                                                            | 3.81                  | 5.97    | 8.10                  | 2.19    | 2.32                   | 5.07                  | 2.90                   | 2.25                   | 4.03                   | 5.05                   | 1.91                  |                       |                       |                       |                       |                       |         |                       |         |                        |          |                        |                        |                        |                        |          |                         |      |      |      |      |      |      |       |      |      |      |      |      |      |      |      |      |      |      |      |      |      |      |      |      |      |                       |      |      |      |       |       |      |        |       |       |       |      |       |       |       |       |       |       |      |       |       |       |       |       |       |       |      |       |      |      |      |      |      |      |      |      |      |      |      |      |      |      |      |      |      |      |      |      |      |      |      |      |      |      |          |    |    |   |    |                   |                   |                   |    |                   |                   |                   |                   |                   |                   |                   |     |                   |     |                   |     |                   |                   |                       |                   |    |           |       |       |      |     |      |     |     |       |     |      |     |     |      |     |      |      |      |     |      |      |      |      |      |     |     |
| Rel. Inten. (% of BP)                                                                                                                                                                                                                                                                                                                                                                                                                                                                                                                                                                                                                                                                                                                                                                                                                                                                                                                                                                                                                                                                                                                                                                                                                                                                                                                                                                                                                                                                                                                                                                                                                                                                                                                                                                                                                                                                                                                                                                                                                                                                                                                                                                                                                                                                                                                                                                                                                                                                                                                                                                                                                                                                                                                                                                                                                                                                                                                                                                             | 0.03   | 0.34    | 0.52    | 10.47            | 38.18                 | 8.74                                                                 | 100.00                          | 10.77                      | 33.81                       | 12.33                 | 8.50                  | 11.17                 | 12.20                 | 14.37                                                           | 17.04                 | 26.72   | 27.30                 | 9.82    | 10.39                  | 22.68                 | 12.99                  | -0.13                  | 10.09                  | 18.04                  | 22.62                 | 8.54                  |                       |                       |                       |                       |         |                       |         |                        |          |                        |                        |                        |                        |          |                         |      |      |      |      |      |      |       |      |      |      |      |      |      |      |      |      |      |      |      |      |      |      |      |      |      |                       |      |      |      |       |       |      |        |       |       |       |      |       |       |       |       |       |       |      |       |       |       |       |       |       |       |      |       |      |      |      |      |      |      |      |      |      |      |      |      |      |      |      |      |      |      |      |      |      |      |      |      |      |      |          |    |    |   |    |                   |                   |                   |    |                   |                   |                   |                   |                   |                   |                   |     |                   |     |                   |     |                   |                   |                       |                   |    |           |       |       |      |     |      |     |     |       |     |      |     |     |      |     |      |      |      |     |      |      |      |      |      |     |     |
| Score                                                                                                                                                                                                                                                                                                                                                                                                                                                                                                                                                                                                                                                                                                                                                                                                                                                                                                                                                                                                                                                                                                                                                                                                                                                                                                                                                                                                                                                                                                                                                                                                                                                                                                                                                                                                                                                                                                                                                                                                                                                                                                                                                                                                                                                                                                                                                                                                                                                                                                                                                                                                                                                                                                                                                                                                                                                                                                                                                                                             | 0.20   | 0.22    | 1.00    | 1.50             | 1.50                  | 1.50                                                                 | 1.50                            | 1.50                       | 1.50                        | 1.50                  | 1.50                  | 0.50                  | 0.50                  | 0.50                                                            | 0.50                  | 1.50    | 0.50                  | 1.50    | 0.50                   | 1.50                  | 1.50                   | 0.50                   | 0.50                   | 0.50                   | 0.50                  | 0.50                  |                       |                       |                       |                       |         |                       |         |                        |          |                        |                        |                        |                        |          |                         |      |      |      |      |      |      |       |      |      |      |      |      |      |      |      |      |      |      |      |      |      |      |      |      |      |                       |      |      |      |       |       |      |        |       |       |       |      |       |       |       |       |       |       |      |       |       |       |       |       |       |       |      |       |      |      |      |      |      |      |      |      |      |      |      |      |      |      |      |      |      |      |      |      |      |      |      |      |      |      |          |    |    |   |    |                   |                   |                   |    |                   |                   |                   |                   |                   |                   |                   |     |                   |     |                   |     |                   |                   |                       |                   |    |           |       |       |      |     |      |     |     |       |     |      |     |     |      |     |      |      |      |     |      |      |      |      |      |     |     |
| Ion-type                                                                                                                                                                                                                                                                                                                                                                                                                                                                                                                                                                                                                                                                                                                                                                                                                                                                                                                                                                                                                                                                                                                                                                                                                                                                                                                                                                                                                                                                                                                                                                                                                                                                                                                                                                                                                                                                                                                                                                                                                                                                                                                                                                                                                                                                                                                                                                                                                                                                                                                                                                                                                                                                                                                                                                                                                                                                                                                                                                                          | PR     | LI      | Y       | Y3               | Y10 <sup>+2</sup>     | Y11 <sup>+2</sup>                                                    | Y12 <sup>+2</sup>               | Y6                         | Y13 <sup>+2</sup>           | Y14 <sup>+2</sup>     | Y16 <sup>+2</sup>     | b10 <sup>+2</sup>     | b18 <sup>+3</sup>     | b11 <sup>+2</sup>                                               | b12 <sup>+2</sup>     | Y10     | b15 <sup>+2</sup>     | Y11     | b16 <sup>+2</sup>      | Y12                   | b16 <sup>+2</sup>      | b20 <sup>+2</sup>      | b21-NH3 <sup>+2</sup>  | b21 <sup>+2</sup>      | b9                    |                       |                       |                       |                       |                       |         |                       |         |                        |          |                        |                        |                        |                        |          |                         |      |      |      |      |      |      |       |      |      |      |      |      |      |      |      |      |      |      |      |      |      |      |      |      |      |                       |      |      |      |       |       |      |        |       |       |       |      |       |       |       |       |       |       |      |       |       |       |       |       |       |       |      |       |      |      |      |      |      |      |      |      |      |      |      |      |      |      |      |      |      |      |      |      |      |      |      |      |      |      |          |    |    |   |    |                   |                   |                   |    |                   |                   |                   |                   |                   |                   |                   |     |                   |     |                   |     |                   |                   |                       |                   |    |           |       |       |      |     |      |     |     |       |     |      |     |     |      |     |      |      |      |     |      |      |      |      |      |     |     |
| Delta ppm                                                                                                                                                                                                                                                                                                                                                                                                                                                                                                                                                                                                                                                                                                                                                                                                                                                                                                                                                                                                                                                                                                                                                                                                                                                                                                                                                                                                                                                                                                                                                                                                                                                                                                                                                                                                                                                                                                                                                                                                                                                                                                                                                                                                                                                                                                                                                                                                                                                                                                                                                                                                                                                                                                                                                                                                                                                                                                                                                                                         | -11.8  | -17.7   | -9.5    | 0.2              | -1.1                  | 6.8                                                                  | 3.6                             | -10.9                      | 3.0                         | -0.1                  | 8.2                   | 9.2                   | -5.5                  | 5.6                                                             | -5.4                  | -2.0    | -4.1                  | 6.8     | -9.3                   | -2.3                  | -6.0                   | -6.0                   | -2.9                   | 6.2                    | 0.9                   |                       |                       |                       |                       |                       |         |                       |         |                        |          |                        |                        |                        |                        |          |                         |      |      |      |      |      |      |       |      |      |      |      |      |      |      |      |      |      |      |      |      |      |      |      |      |      |                       |      |      |      |       |       |      |        |       |       |       |      |       |       |       |       |       |       |      |       |       |       |       |       |       |       |      |       |      |      |      |      |      |      |      |      |      |      |      |      |      |      |      |      |      |      |      |      |      |      |      |      |      |      |          |    |    |   |    |                   |                   |                   |    |                   |                   |                   |                   |                   |                   |                   |     |                   |     |                   |     |                   |                   |                       |                   |    |           |       |       |      |     |      |     |     |       |     |      |     |     |      |     |      |      |      |     |      |      |      |      |      |     |     |

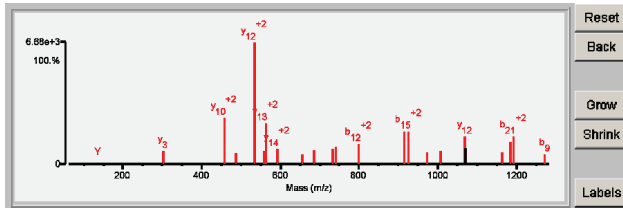

Reset  
Back  
Grow  
Shrink  
Labels

Result Summary

| Rank | Score | SPI (%) | BCS | # Unmatched Ions | Variable sites | Sequence               | MH <sup>+</sup> Calculated (Da) | MH <sup>+</sup> Error (Da) | MH <sup>+</sup> Error (ppm) | Protein MW/pI (Da) | Species | Accession # | Protein Name                                                         |
|------|-------|---------|-----|------------------|----------------|------------------------|---------------------------------|----------------------------|-----------------------------|--------------------|---------|-------------|----------------------------------------------------------------------|
| 1    | 11.43 | 70.3    | 6   | 10/25            | K126k          | (K)SFYPEEVSSMVLTKMK(E) | 1875.9231                       | 114.0624                   | 9.8                         | 70898.4/5.38       | HUMAN   | P11142      | Heat shock cognate 71 kDa protein OS=Homo sapiens GN=HSPA8 PE=1 SV=1 |
| 1    | 11.43 | 70.3    | 6   | 10/25            | K128k          | (K)SFYPEEVSSMVLTKMK(E) | 1875.9231                       | 114.0624                   | 9.8                         | 70898.4/5.38       | HUMAN   | P11142      | Heat shock cognate 71 kDa protein OS=Homo sapiens GN=HSPA8 PE=1 SV=1 |

Detailed Results

| Rank                                                                                                                                                                                                                                                                                                                                                                                                                                                                                                                                                                                                                                                                                                                                                                                                                                                                                                                                                                                                                                                                                                                                                                                                                                                                                                                                                                                                                                                                                                                                                                                                                                                                                                                                                                                                                                                                                                                                                                                                                                                                                                                                                                                                                                                                                                                                                                                                                                                                                                                                                                                                                                     | Score  | SPI (%) | BCS    | # Unmatched Ions | Variable sites | Sequence                                         | MH <sup>+</sup> Calculated (Da) | MH <sup>+</sup> Error (Da) | MH <sup>+</sup> Error (ppm) | Protein MW/pI (Da) | Species        | Accession # | MS-Digest Index # | Protein Name                                                         |                       |                |                |                |         |                               |                |                               |          |          |          |         |         |         |                       |                       |         |         |         |         |                       |         |                       |          |          |          |                         |      |      |      |      |      |      |      |      |       |      |      |      |      |      |      |      |      |      |      |       |      |       |      |      |      |                       |      |       |      |      |       |      |      |       |        |       |       |       |       |       |       |       |       |       |       |       |       |       |       |       |       |       |      |       |      |      |       |      |      |       |      |      |      |       |      |       |       |       |      |      |      |      |      |      |       |       |       |          |    |  |    |    |  |   |   |  |                |    |                |  |     |  |  |                |                |                |  |                               |                |                               |  |  |  |           |     |  |      |      |  |      |       |  |     |      |       |  |      |  |  |       |      |     |  |      |       |     |  |  |  |
|------------------------------------------------------------------------------------------------------------------------------------------------------------------------------------------------------------------------------------------------------------------------------------------------------------------------------------------------------------------------------------------------------------------------------------------------------------------------------------------------------------------------------------------------------------------------------------------------------------------------------------------------------------------------------------------------------------------------------------------------------------------------------------------------------------------------------------------------------------------------------------------------------------------------------------------------------------------------------------------------------------------------------------------------------------------------------------------------------------------------------------------------------------------------------------------------------------------------------------------------------------------------------------------------------------------------------------------------------------------------------------------------------------------------------------------------------------------------------------------------------------------------------------------------------------------------------------------------------------------------------------------------------------------------------------------------------------------------------------------------------------------------------------------------------------------------------------------------------------------------------------------------------------------------------------------------------------------------------------------------------------------------------------------------------------------------------------------------------------------------------------------------------------------------------------------------------------------------------------------------------------------------------------------------------------------------------------------------------------------------------------------------------------------------------------------------------------------------------------------------------------------------------------------------------------------------------------------------------------------------------------------|--------|---------|--------|------------------|----------------|--------------------------------------------------|---------------------------------|----------------------------|-----------------------------|--------------------|----------------|-------------|-------------------|----------------------------------------------------------------------|-----------------------|----------------|----------------|----------------|---------|-------------------------------|----------------|-------------------------------|----------|----------|----------|---------|---------|---------|-----------------------|-----------------------|---------|---------|---------|---------|-----------------------|---------|-----------------------|----------|----------|----------|-------------------------|------|------|------|------|------|------|------|------|-------|------|------|------|------|------|------|------|------|------|------|-------|------|-------|------|------|------|-----------------------|------|-------|------|------|-------|------|------|-------|--------|-------|-------|-------|-------|-------|-------|-------|-------|-------|-------|-------|-------|-------|-------|-------|-------|-------|------|-------|------|------|-------|------|------|-------|------|------|------|-------|------|-------|-------|-------|------|------|------|------|------|------|-------|-------|-------|----------|----|--|----|----|--|---|---|--|----------------|----|----------------|--|-----|--|--|----------------|----------------|----------------|--|-------------------------------|----------------|-------------------------------|--|--|--|-----------|-----|--|------|------|--|------|-------|--|-----|------|-------|--|------|--|--|-------|------|-----|--|------|-------|-----|--|--|--|
| 1                                                                                                                                                                                                                                                                                                                                                                                                                                                                                                                                                                                                                                                                                                                                                                                                                                                                                                                                                                                                                                                                                                                                                                                                                                                                                                                                                                                                                                                                                                                                                                                                                                                                                                                                                                                                                                                                                                                                                                                                                                                                                                                                                                                                                                                                                                                                                                                                                                                                                                                                                                                                                                        | 11.43  | 70.3    | 6      | 10/25            | K126k          | (K)S F   Y / P E E V \ S N V / L / T / k M K (E) | 1875.9231                       | 114.0624                   | 9.8                         | 70898.4/5.38       | HUMAN          | P11142      | 300597            | Heat shock cognate 71 kDa protein OS=Homo sapiens GN=HSPA8 PE=1 SV=1 |                       |                |                |                |         |                               |                |                               |          |          |          |         |         |         |                       |                       |         |         |         |         |                       |         |                       |          |          |          |                         |      |      |      |      |      |      |      |      |       |      |      |      |      |      |      |      |      |      |      |       |      |       |      |      |      |                       |      |       |      |      |       |      |      |       |        |       |       |       |       |       |       |       |       |       |       |       |       |       |       |       |       |       |      |       |      |      |       |      |      |       |      |      |      |       |      |       |       |       |      |      |      |      |      |      |       |       |       |          |    |  |    |    |  |   |   |  |                |    |                |  |     |  |  |                |                |                |  |                               |                |                               |  |  |  |           |     |  |      |      |  |      |       |  |     |      |       |  |      |  |  |       |      |     |  |      |       |     |  |  |  |
| <table border="1"> <thead> <tr> <th>Fragment-ion (m/z)</th> <th>70.065</th> <th>72.084</th> <th>84.080</th> <th>86.096</th> <th>104.052</th> <th>120.081</th> <th>136.074</th> <th>162.093</th> <th>207.114</th> <th>227.104</th> <th>235.106</th> <th>298.177</th> <th>356.144</th> <th>376.836<sup>+3</sup></th> <th>455.219<sup>+2</sup></th> <th>483.747</th> <th>520.281</th> <th>621.338</th> <th>734.428</th> <th>796.903<sup>+2</sup></th> <th>852.361</th> <th>878.439<sup>+2</sup></th> <th>1005.961</th> <th>1138.696</th> <th>1238.656</th> </tr> </thead> <tbody> <tr> <td>Frac. Inten. (% of TIC)</td> <td>0.01</td> <td>2.73</td> <td>0.21</td> <td>0.13</td> <td>4.15</td> <td>0.10</td> <td>0.58</td> <td>2.81</td> <td>14.90</td> <td>3.15</td> <td>3.75</td> <td>2.50</td> <td>4.79</td> <td>2.58</td> <td>4.82</td> <td>2.99</td> <td>2.77</td> <td>8.33</td> <td>5.22</td> <td>13.39</td> <td>2.78</td> <td>10.19</td> <td>2.32</td> <td>2.47</td> <td>2.33</td> </tr> <tr> <td>Rel. Inten. (% of BP)</td> <td>0.04</td> <td>18.30</td> <td>1.42</td> <td>0.85</td> <td>27.85</td> <td>0.69</td> <td>3.92</td> <td>18.89</td> <td>100.00</td> <td>21.17</td> <td>25.15</td> <td>16.77</td> <td>32.13</td> <td>17.34</td> <td>32.38</td> <td>20.09</td> <td>18.57</td> <td>55.89</td> <td>35.06</td> <td>89.87</td> <td>18.68</td> <td>68.40</td> <td>15.57</td> <td>16.55</td> <td>15.64</td> </tr> <tr> <td>Score</td> <td>0.20</td> <td>-0.18</td> <td>0.50</td> <td>0.22</td> <td>-0.28</td> <td>1.00</td> <td>1.00</td> <td>-0.19</td> <td>0.50</td> <td>0.75</td> <td>0.50</td> <td>-0.17</td> <td>0.75</td> <td>-0.17</td> <td>-0.32</td> <td>-0.20</td> <td>1.50</td> <td>1.50</td> <td>1.50</td> <td>1.50</td> <td>0.50</td> <td>1.50</td> <td>-0.16</td> <td>-0.17</td> <td>-0.16</td> </tr> <tr> <td>Ion-type</td> <td>PR</td> <td></td> <td>KQ</td> <td>LI</td> <td></td> <td>F</td> <td>Y</td> <td></td> <td>a<sub>2</sub></td> <td>PE</td> <td>b<sub>2</sub></td> <td></td> <td>PEE</td> <td></td> <td></td> <td>y<sub>3</sub></td> <td>y<sub>4</sub></td> <td>y<sub>5</sub></td> <td></td> <td>y<sub>13</sub><sup>+2</sup></td> <td>b<sub>7</sub></td> <td>y<sub>14</sub><sup>+2</sup></td> <td></td> <td></td> <td></td> </tr> <tr> <td>Delta ppm</td> <td>3.9</td> <td></td> <td>-9.2</td> <td>-0.3</td> <td></td> <td>-0.6</td> <td>-10.2</td> <td></td> <td>0.5</td> <td>-0.6</td> <td>-14.1</td> <td></td> <td>-7.4</td> <td></td> <td></td> <td>-20.3</td> <td>-1.9</td> <td>7.1</td> <td></td> <td>-2.3</td> <td>-20.1</td> <td>3.4</td> <td></td> <td></td> <td></td> </tr> </tbody> </table> |        |         |        |                  |                |                                                  |                                 |                            |                             |                    |                |             |                   |                                                                      | Fragment-ion (m/z)    | 70.065         | 72.084         | 84.080         | 86.096  | 104.052                       | 120.081        | 136.074                       | 162.093  | 207.114  | 227.104  | 235.106 | 298.177 | 356.144 | 376.836 <sup>+3</sup> | 455.219 <sup>+2</sup> | 483.747 | 520.281 | 621.338 | 734.428 | 796.903 <sup>+2</sup> | 852.361 | 878.439 <sup>+2</sup> | 1005.961 | 1138.696 | 1238.656 | Frac. Inten. (% of TIC) | 0.01 | 2.73 | 0.21 | 0.13 | 4.15 | 0.10 | 0.58 | 2.81 | 14.90 | 3.15 | 3.75 | 2.50 | 4.79 | 2.58 | 4.82 | 2.99 | 2.77 | 8.33 | 5.22 | 13.39 | 2.78 | 10.19 | 2.32 | 2.47 | 2.33 | Rel. Inten. (% of BP) | 0.04 | 18.30 | 1.42 | 0.85 | 27.85 | 0.69 | 3.92 | 18.89 | 100.00 | 21.17 | 25.15 | 16.77 | 32.13 | 17.34 | 32.38 | 20.09 | 18.57 | 55.89 | 35.06 | 89.87 | 18.68 | 68.40 | 15.57 | 16.55 | 15.64 | Score | 0.20 | -0.18 | 0.50 | 0.22 | -0.28 | 1.00 | 1.00 | -0.19 | 0.50 | 0.75 | 0.50 | -0.17 | 0.75 | -0.17 | -0.32 | -0.20 | 1.50 | 1.50 | 1.50 | 1.50 | 0.50 | 1.50 | -0.16 | -0.17 | -0.16 | Ion-type | PR |  | KQ | LI |  | F | Y |  | a <sub>2</sub> | PE | b <sub>2</sub> |  | PEE |  |  | y <sub>3</sub> | y <sub>4</sub> | y <sub>5</sub> |  | y <sub>13</sub> <sup>+2</sup> | b <sub>7</sub> | y <sub>14</sub> <sup>+2</sup> |  |  |  | Delta ppm | 3.9 |  | -9.2 | -0.3 |  | -0.6 | -10.2 |  | 0.5 | -0.6 | -14.1 |  | -7.4 |  |  | -20.3 | -1.9 | 7.1 |  | -2.3 | -20.1 | 3.4 |  |  |  |
| Fragment-ion (m/z)                                                                                                                                                                                                                                                                                                                                                                                                                                                                                                                                                                                                                                                                                                                                                                                                                                                                                                                                                                                                                                                                                                                                                                                                                                                                                                                                                                                                                                                                                                                                                                                                                                                                                                                                                                                                                                                                                                                                                                                                                                                                                                                                                                                                                                                                                                                                                                                                                                                                                                                                                                                                                       | 70.065 | 72.084  | 84.080 | 86.096           | 104.052        | 120.081                                          | 136.074                         | 162.093                    | 207.114                     | 227.104            | 235.106        | 298.177     | 356.144           | 376.836 <sup>+3</sup>                                                | 455.219 <sup>+2</sup> | 483.747        | 520.281        | 621.338        | 734.428 | 796.903 <sup>+2</sup>         | 852.361        | 878.439 <sup>+2</sup>         | 1005.961 | 1138.696 | 1238.656 |         |         |         |                       |                       |         |         |         |         |                       |         |                       |          |          |          |                         |      |      |      |      |      |      |      |      |       |      |      |      |      |      |      |      |      |      |      |       |      |       |      |      |      |                       |      |       |      |      |       |      |      |       |        |       |       |       |       |       |       |       |       |       |       |       |       |       |       |       |       |       |      |       |      |      |       |      |      |       |      |      |      |       |      |       |       |       |      |      |      |      |      |      |       |       |       |          |    |  |    |    |  |   |   |  |                |    |                |  |     |  |  |                |                |                |  |                               |                |                               |  |  |  |           |     |  |      |      |  |      |       |  |     |      |       |  |      |  |  |       |      |     |  |      |       |     |  |  |  |
| Frac. Inten. (% of TIC)                                                                                                                                                                                                                                                                                                                                                                                                                                                                                                                                                                                                                                                                                                                                                                                                                                                                                                                                                                                                                                                                                                                                                                                                                                                                                                                                                                                                                                                                                                                                                                                                                                                                                                                                                                                                                                                                                                                                                                                                                                                                                                                                                                                                                                                                                                                                                                                                                                                                                                                                                                                                                  | 0.01   | 2.73    | 0.21   | 0.13             | 4.15           | 0.10                                             | 0.58                            | 2.81                       | 14.90                       | 3.15               | 3.75           | 2.50        | 4.79              | 2.58                                                                 | 4.82                  | 2.99           | 2.77           | 8.33           | 5.22    | 13.39                         | 2.78           | 10.19                         | 2.32     | 2.47     | 2.33     |         |         |         |                       |                       |         |         |         |         |                       |         |                       |          |          |          |                         |      |      |      |      |      |      |      |      |       |      |      |      |      |      |      |      |      |      |      |       |      |       |      |      |      |                       |      |       |      |      |       |      |      |       |        |       |       |       |       |       |       |       |       |       |       |       |       |       |       |       |       |       |      |       |      |      |       |      |      |       |      |      |      |       |      |       |       |       |      |      |      |      |      |      |       |       |       |          |    |  |    |    |  |   |   |  |                |    |                |  |     |  |  |                |                |                |  |                               |                |                               |  |  |  |           |     |  |      |      |  |      |       |  |     |      |       |  |      |  |  |       |      |     |  |      |       |     |  |  |  |
| Rel. Inten. (% of BP)                                                                                                                                                                                                                                                                                                                                                                                                                                                                                                                                                                                                                                                                                                                                                                                                                                                                                                                                                                                                                                                                                                                                                                                                                                                                                                                                                                                                                                                                                                                                                                                                                                                                                                                                                                                                                                                                                                                                                                                                                                                                                                                                                                                                                                                                                                                                                                                                                                                                                                                                                                                                                    | 0.04   | 18.30   | 1.42   | 0.85             | 27.85          | 0.69                                             | 3.92                            | 18.89                      | 100.00                      | 21.17              | 25.15          | 16.77       | 32.13             | 17.34                                                                | 32.38                 | 20.09          | 18.57          | 55.89          | 35.06   | 89.87                         | 18.68          | 68.40                         | 15.57    | 16.55    | 15.64    |         |         |         |                       |                       |         |         |         |         |                       |         |                       |          |          |          |                         |      |      |      |      |      |      |      |      |       |      |      |      |      |      |      |      |      |      |      |       |      |       |      |      |      |                       |      |       |      |      |       |      |      |       |        |       |       |       |       |       |       |       |       |       |       |       |       |       |       |       |       |       |      |       |      |      |       |      |      |       |      |      |      |       |      |       |       |       |      |      |      |      |      |      |       |       |       |          |    |  |    |    |  |   |   |  |                |    |                |  |     |  |  |                |                |                |  |                               |                |                               |  |  |  |           |     |  |      |      |  |      |       |  |     |      |       |  |      |  |  |       |      |     |  |      |       |     |  |  |  |
| Score                                                                                                                                                                                                                                                                                                                                                                                                                                                                                                                                                                                                                                                                                                                                                                                                                                                                                                                                                                                                                                                                                                                                                                                                                                                                                                                                                                                                                                                                                                                                                                                                                                                                                                                                                                                                                                                                                                                                                                                                                                                                                                                                                                                                                                                                                                                                                                                                                                                                                                                                                                                                                                    | 0.20   | -0.18   | 0.50   | 0.22             | -0.28          | 1.00                                             | 1.00                            | -0.19                      | 0.50                        | 0.75               | 0.50           | -0.17       | 0.75              | -0.17                                                                | -0.32                 | -0.20          | 1.50           | 1.50           | 1.50    | 1.50                          | 0.50           | 1.50                          | -0.16    | -0.17    | -0.16    |         |         |         |                       |                       |         |         |         |         |                       |         |                       |          |          |          |                         |      |      |      |      |      |      |      |      |       |      |      |      |      |      |      |      |      |      |      |       |      |       |      |      |      |                       |      |       |      |      |       |      |      |       |        |       |       |       |       |       |       |       |       |       |       |       |       |       |       |       |       |       |      |       |      |      |       |      |      |       |      |      |      |       |      |       |       |       |      |      |      |      |      |      |       |       |       |          |    |  |    |    |  |   |   |  |                |    |                |  |     |  |  |                |                |                |  |                               |                |                               |  |  |  |           |     |  |      |      |  |      |       |  |     |      |       |  |      |  |  |       |      |     |  |      |       |     |  |  |  |
| Ion-type                                                                                                                                                                                                                                                                                                                                                                                                                                                                                                                                                                                                                                                                                                                                                                                                                                                                                                                                                                                                                                                                                                                                                                                                                                                                                                                                                                                                                                                                                                                                                                                                                                                                                                                                                                                                                                                                                                                                                                                                                                                                                                                                                                                                                                                                                                                                                                                                                                                                                                                                                                                                                                 | PR     |         | KQ     | LI               |                | F                                                | Y                               |                            | a <sub>2</sub>              | PE                 | b <sub>2</sub> |             | PEE               |                                                                      |                       | y <sub>3</sub> | y <sub>4</sub> | y <sub>5</sub> |         | y <sub>13</sub> <sup>+2</sup> | b <sub>7</sub> | y <sub>14</sub> <sup>+2</sup> |          |          |          |         |         |         |                       |                       |         |         |         |         |                       |         |                       |          |          |          |                         |      |      |      |      |      |      |      |      |       |      |      |      |      |      |      |      |      |      |      |       |      |       |      |      |      |                       |      |       |      |      |       |      |      |       |        |       |       |       |       |       |       |       |       |       |       |       |       |       |       |       |       |       |      |       |      |      |       |      |      |       |      |      |      |       |      |       |       |       |      |      |      |      |      |      |       |       |       |          |    |  |    |    |  |   |   |  |                |    |                |  |     |  |  |                |                |                |  |                               |                |                               |  |  |  |           |     |  |      |      |  |      |       |  |     |      |       |  |      |  |  |       |      |     |  |      |       |     |  |  |  |
| Delta ppm                                                                                                                                                                                                                                                                                                                                                                                                                                                                                                                                                                                                                                                                                                                                                                                                                                                                                                                                                                                                                                                                                                                                                                                                                                                                                                                                                                                                                                                                                                                                                                                                                                                                                                                                                                                                                                                                                                                                                                                                                                                                                                                                                                                                                                                                                                                                                                                                                                                                                                                                                                                                                                | 3.9    |         | -9.2   | -0.3             |                | -0.6                                             | -10.2                           |                            | 0.5                         | -0.6               | -14.1          |             | -7.4              |                                                                      |                       | -20.3          | -1.9           | 7.1            |         | -2.3                          | -20.1          | 3.4                           |          |          |          |         |         |         |                       |                       |         |         |         |         |                       |         |                       |          |          |          |                         |      |      |      |      |      |      |      |      |       |      |      |      |      |      |      |      |      |      |      |       |      |       |      |      |      |                       |      |       |      |      |       |      |      |       |        |       |       |       |       |       |       |       |       |       |       |       |       |       |       |       |       |       |      |       |      |      |       |      |      |       |      |      |      |       |      |       |       |       |      |      |      |      |      |      |       |       |       |          |    |  |    |    |  |   |   |  |                |    |                |  |     |  |  |                |                |                |  |                               |                |                               |  |  |  |           |     |  |      |      |  |      |       |  |     |      |       |  |      |  |  |       |      |     |  |      |       |     |  |  |  |

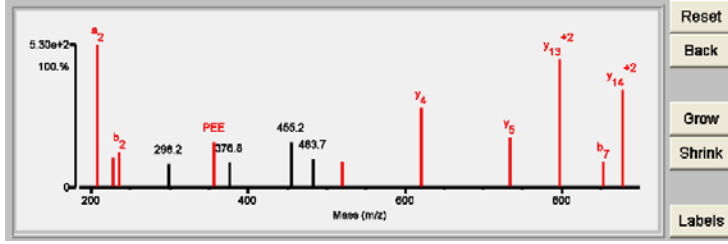

Reset

Back

Grow

Shrink

Labels



Result Summary

| Rank | Score | SPI (%) | BCS | # Unmatched Ions | # Variable sites | Sequence                                                                                                                       | MH <sup>+</sup> Calculated (Da) | MH <sup>+</sup> Error (Da) | MH <sup>+</sup> Error (ppm) | Protein MW/pi (Da) | Species | Accession #            | Protein Name                                                     |
|------|-------|---------|-----|------------------|------------------|--------------------------------------------------------------------------------------------------------------------------------|---------------------------------|----------------------------|-----------------------------|--------------------|---------|------------------------|------------------------------------------------------------------|
| 1    | 15.15 | 75.4    | 9   | 8/25             | K388k            | (R)G <sup>C</sup> A <sup>L</sup> L <sup>Q</sup> C <sup>A</sup> L <sup>S</sup> P <sup>A</sup> F <sup>K</sup> V <sup>R</sup> (E) | 1790.9404                       | 114.0577                   | 7.8                         | 96865.5/5.28       | HUMAN   | <a href="#">Q92598</a> | Heat shock protein 105 kDa OS=Homo sapiens GN=HSPH1 PE=1 SV=1    |
| 1    | 15.15 | 75.4    | 9   | 8/25             | K388k            | (R)G <sup>C</sup> A <sup>L</sup> L <sup>Q</sup> C <sup>A</sup> L <sup>S</sup> P <sup>A</sup> F <sup>K</sup> V <sup>R</sup> (E) | 1790.9404                       | 114.0577                   | 7.8                         | 94487.0/5.63       | HUMAN   | <a href="#">Q95757</a> | Heat shock 70 kDa protein 4L OS=Homo sapiens GN=HSPA4L PE=1 SV=2 |
| 1    | 15.15 | 75.4    | 9   | 8/25             | K388k            | (R)G <sup>C</sup> A <sup>L</sup> L <sup>Q</sup> C <sup>A</sup> L <sup>S</sup> P <sup>A</sup> F <sup>K</sup> V <sup>R</sup> (E) | 1790.9404                       | 114.0577                   | 7.8                         | 94331.4/5.11       | HUMAN   | <a href="#">P34932</a> | Heat shock 70 kDa protein 4 OS=Homo sapiens GN=HSPA4 PE=1 SV=4   |

Detailed Results

| Rank | Score | SPI (%) | BCS | # Unmatched Ions | # Variable sites | Sequence                                                                                                                       | MH <sup>+</sup> Calculated (Da) | MH <sup>+</sup> Error (Da) | MH <sup>+</sup> Error (ppm) | Protein MW/pi (Da) | Species | Accession #            | MS-Digest Index #      | Protein Name                                                     |
|------|-------|---------|-----|------------------|------------------|--------------------------------------------------------------------------------------------------------------------------------|---------------------------------|----------------------------|-----------------------------|--------------------|---------|------------------------|------------------------|------------------------------------------------------------------|
| 1    | 15.15 | 75.4    | 9   | 8/25             | K388k            | (R)G <sup>C</sup> A <sup>L</sup> L <sup>Q</sup> C <sup>A</sup> L <sup>S</sup> P <sup>A</sup> F <sup>K</sup> V <sup>R</sup> (E) | 1790.9404                       | 114.0577                   | 7.8                         | 96865.5/5.28       | HUMAN   | <a href="#">Q92598</a> | <a href="#">296579</a> | Heat shock protein 105 kDa OS=Homo sapiens GN=HSPH1 PE=1 SV=1    |
| 1    | 15.15 | 75.4    | 9   | 8/25             | K388k            | (R)G <sup>C</sup> A <sup>L</sup> L <sup>Q</sup> C <sup>A</sup> L <sup>S</sup> P <sup>A</sup> F <sup>K</sup> V <sup>R</sup> (E) | 1790.9404                       | 114.0577                   | 7.8                         | 94487.0/5.63       | HUMAN   | <a href="#">Q95757</a> | <a href="#">296699</a> | Heat shock 70 kDa protein 4L OS=Homo sapiens GN=HSPA4L PE=1 SV=2 |
| 1    | 15.15 | 75.4    | 9   | 8/25             | K388k            | (R)G <sup>C</sup> A <sup>L</sup> L <sup>Q</sup> C <sup>A</sup> L <sup>S</sup> P <sup>A</sup> F <sup>K</sup> V <sup>R</sup> (E) | 1790.9404                       | 114.0577                   | 7.8                         | 94331.4/5.11       | HUMAN   | <a href="#">P34932</a> | <a href="#">300517</a> | Heat shock 70 kDa protein 4 OS=Homo sapiens GN=HSPA4 PE=1 SV=4   |

| Fragment-Ion (m/z)      | 70.067 | 75.054 | 84.081 | 86.095 | 89.059 | 101.069 | 198.084 | 218.053 | 289.095 | 343.111 | 380.077 | 401.197          | 416.256 <sup>+2</sup> | 459.773 <sup>+2</sup> | 516.327 | 529.285 | 663.404 | 734.434 | 743.435 <sup>+2</sup> | 761.293 | 831.480 | 874.393 | 918.509 | 1031.605 | 1144.653 |
|-------------------------|--------|--------|--------|--------|--------|---------|---------|---------|---------|---------|---------|------------------|-----------------------|-----------------------|---------|---------|---------|---------|-----------------------|---------|---------|---------|---------|----------|----------|
| Frac. Inten. (% of TIC) | 0.00   | 4.22   | 0.07   | 0.37   | 2.21   | 0.11    | 5.18    | 3.32    | 6.02    | 2.11    | 2.68    | 2.10             | 11.05                 | 2.90                  | 2.82    | 2.15    | 3.50    | 3.31    | 3.92                  | 4.13    | 16.14   | 2.54    | 10.31   | 6.53     | 2.31     |
| Rel. Inten. (% of BP)   | 0.02   | 26.12  | 0.44   | 2.30   | 13.70  | 0.67    | 32.06   | 20.56   | 37.30   | 13.10   | 16.62   | 13.00            | 68.45                 | 17.98                 | 17.46   | 13.33   | 21.68   | 20.51   | 24.28                 | 25.58   | 100.00  | 15.75   | 63.87   | 40.43    | 14.29    |
| Score                   | 0.20   | -0.26  |        | 0.22   | -0.14  | 0.50    | -0.32   | 0.50    | 0.75    | -0.13   | -0.17   | -0.13            | 1.50                  | 1.50                  | 1.50    | -0.13   | 1.50    | 1.50    | -0.24                 | 0.50    | 1.50    | 0.50    | 1.50    | 1.50     | 1.50     |
| Ion-type                | PR     |        | QK     | LI     |        | QK      |         | b2      | b3      |         |         | y6 <sup>+2</sup> | y7 <sup>+2</sup>      | y3                    |         | y4      | y5      |         | b7                    | y6      | b8      | y7      | y8      | y9       |          |
| Delta ppm               | 26.8   |        |        | -18.9  |        | -15.2   |         | -35.7   |         |         |         |                  | 24.7                  | 26.1                  | 3.2     |         | 15.4    |         | 4.7                   | -19.8   | -4.5    | 0.8     | -7.3    | 5.7      | -26.4    |

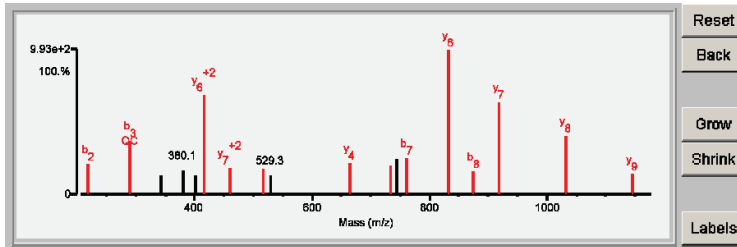

Result Summary

| Rank | Score | SPI (%) | BCS | # Unmatched Ions | Variable sites | Sequence                | MH <sup>+</sup> Calculated (Da) | MH <sup>+</sup> Error (Da) | MH <sup>+</sup> Error (ppm) | Protein MW/pl (Da) | Species | Accession # | Protein Name                                                           |
|------|-------|---------|-----|------------------|----------------|-------------------------|---------------------------------|----------------------------|-----------------------------|--------------------|---------|-------------|------------------------------------------------------------------------|
| 1    | 16.65 | 86.3    | 10  | 6/25             | K188k          | (R)IINEPTAAAIAYGLDKK(G) | 1787.9902                       | 114.0536                   | 5.6                         | 70021.3/5.56       | HUMAN   | P54652      | Heat shock-related 70 kDa protein 2 OS=Homo sapiens GN=HSPA2 PE=1 SV=1 |
| 1    | 16.65 | 86.3    | 10  | 6/25             | K189k          | (R)IINEPTAAAIAYGLDKK(G) | 1787.9902                       | 114.0536                   | 5.6                         | 70021.3/5.56       | HUMAN   | P54652      | Heat shock-related 70 kDa protein 2 OS=Homo sapiens GN=HSPA2 PE=1 SV=1 |
| 1    | 16.65 | 86.3    | 10  | 6/25             | K187k          | (R)IINEPTAAAIAYGLDKK(V) | 1787.9902                       | 114.0536                   | 5.6                         | 70898.4/5.38       | HUMAN   | P11142      | Heat shock cognate 71 kDa protein OS=Homo sapiens GN=HSPA8 PE=1 SV=1   |
| 1    | 16.65 | 86.3    | 10  | 6/25             | K188k          | (R)IINEPTAAAIAYGLDKK(V) | 1787.9902                       | 114.0536                   | 5.6                         | 70898.4/5.38       | HUMAN   | P11142      | Heat shock cognate 71 kDa protein OS=Homo sapiens GN=HSPA8 PE=1 SV=1   |

Detailed Results

| Rank                                                                                                                                                                                                                                                                                                                                                                                                                                                                                                                                                                                                                                                                                                                                                                                                                                                                                                                                                                                                                                                                                                                                                                                                                                                                                                                                                                                                                                                                                                                                                                                                                                                                                                                                                                                                                                                                                                                                                                                                                                                                                                                                                                                                                                                                                                                                                                                                                                                                                                                                                                                                                                                                                                                                                                                                            | Score  | SPI (%) | BCS            | # Unmatched Ions | Variable sites | Sequence                               | MH <sup>+</sup> Calculated (Da) | MH <sup>+</sup> Error (Da) | MH <sup>+</sup> Error (ppm) | Protein MW/pl (Da)           | Species | Accession #    | MS-Digest Index # | Protein Name                                                           |                    |                |                |                |                       |                               |                       |                       |                |                |                       |         |         |         |                       |         |         |         |         |                       |         |                       |                       |         |         |         |                        |      |      |       |      |       |      |      |      |      |      |      |      |      |      |      |      |      |      |      |      |      |      |      |      |      |                      |      |      |        |      |       |       |       |       |      |       |      |      |      |      |       |       |       |      |      |      |       |       |      |       |       |       |      |      |      |      |      |      |      |      |      |      |      |      |      |       |      |      |       |      |       |      |       |      |       |      |      |          |    |    |                |   |                |                |                  |                |       |                              |        |                |                |                |                   |                |                |                |                |                               |                |                |                |                |           |      |      |       |      |      |       |       |     |      |       |       |       |      |      |      |      |      |      |      |      |     |     |       |       |
|-----------------------------------------------------------------------------------------------------------------------------------------------------------------------------------------------------------------------------------------------------------------------------------------------------------------------------------------------------------------------------------------------------------------------------------------------------------------------------------------------------------------------------------------------------------------------------------------------------------------------------------------------------------------------------------------------------------------------------------------------------------------------------------------------------------------------------------------------------------------------------------------------------------------------------------------------------------------------------------------------------------------------------------------------------------------------------------------------------------------------------------------------------------------------------------------------------------------------------------------------------------------------------------------------------------------------------------------------------------------------------------------------------------------------------------------------------------------------------------------------------------------------------------------------------------------------------------------------------------------------------------------------------------------------------------------------------------------------------------------------------------------------------------------------------------------------------------------------------------------------------------------------------------------------------------------------------------------------------------------------------------------------------------------------------------------------------------------------------------------------------------------------------------------------------------------------------------------------------------------------------------------------------------------------------------------------------------------------------------------------------------------------------------------------------------------------------------------------------------------------------------------------------------------------------------------------------------------------------------------------------------------------------------------------------------------------------------------------------------------------------------------------------------------------------------------|--------|---------|----------------|------------------|----------------|----------------------------------------|---------------------------------|----------------------------|-----------------------------|------------------------------|---------|----------------|-------------------|------------------------------------------------------------------------|--------------------|----------------|----------------|----------------|-----------------------|-------------------------------|-----------------------|-----------------------|----------------|----------------|-----------------------|---------|---------|---------|-----------------------|---------|---------|---------|---------|-----------------------|---------|-----------------------|-----------------------|---------|---------|---------|------------------------|------|------|-------|------|-------|------|------|------|------|------|------|------|------|------|------|------|------|------|------|------|------|------|------|------|------|----------------------|------|------|--------|------|-------|-------|-------|-------|------|-------|------|------|------|------|-------|-------|-------|------|------|------|-------|-------|------|-------|-------|-------|------|------|------|------|------|------|------|------|------|------|------|------|------|-------|------|------|-------|------|-------|------|-------|------|-------|------|------|----------|----|----|----------------|---|----------------|----------------|------------------|----------------|-------|------------------------------|--------|----------------|----------------|----------------|-------------------|----------------|----------------|----------------|----------------|-------------------------------|----------------|----------------|----------------|----------------|-----------|------|------|-------|------|------|-------|-------|-----|------|-------|-------|-------|------|------|------|------|------|------|------|------|-----|-----|-------|-------|
| 1                                                                                                                                                                                                                                                                                                                                                                                                                                                                                                                                                                                                                                                                                                                                                                                                                                                                                                                                                                                                                                                                                                                                                                                                                                                                                                                                                                                                                                                                                                                                                                                                                                                                                                                                                                                                                                                                                                                                                                                                                                                                                                                                                                                                                                                                                                                                                                                                                                                                                                                                                                                                                                                                                                                                                                                                               | 16.65  | 86.3    | 10             | 6/25             | K188k          | (R)I I N E P T A A I A Y G L D K K (G) | 1787.9902                       | 114.0536                   | 5.6                         | 70021.3/5.56                 | HUMAN   | P54652         | 300485            | Heat shock-related 70 kDa protein 2 OS=Homo sapiens GN=HSPA2 PE=1 SV=1 |                    |                |                |                |                       |                               |                       |                       |                |                |                       |         |         |         |                       |         |         |         |         |                       |         |                       |                       |         |         |         |                        |      |      |       |      |       |      |      |      |      |      |      |      |      |      |      |      |      |      |      |      |      |      |      |      |      |                      |      |      |        |      |       |       |       |       |      |       |      |      |      |      |       |       |       |      |      |      |       |       |      |       |       |       |      |      |      |      |      |      |      |      |      |      |      |      |      |       |      |      |       |      |       |      |       |      |       |      |      |          |    |    |                |   |                |                |                  |                |       |                              |        |                |                |                |                   |                |                |                |                |                               |                |                |                |                |           |      |      |       |      |      |       |       |     |      |       |       |       |      |      |      |      |      |      |      |      |     |     |       |       |
| <table border="1"> <thead> <tr> <th>Fragment-ion (m/z)</th> <th>70.066</th> <th>84.081</th> <th>86.095</th> <th>136.075</th> <th>199.181</th> <th>227.174</th> <th>370.193</th> <th>389.251</th> <th>412.216</th> <th>419.222<sup>+2</sup></th> <th>512.272</th> <th>525.299</th> <th>617.353</th> <th>656.370<sup>+2</sup></th> <th>674.379</th> <th>716.914</th> <th>717.420</th> <th>739.399</th> <th>758.408<sup>+2</sup></th> <th>810.435</th> <th>837.447<sup>+2</sup></th> <th>838.452<sup>+2</sup></th> <th>838.608</th> <th>881.476</th> <th>908.474</th> </tr> </thead> <tbody> <tr> <td>Frac. Inten.(% of TIC)</td> <td>0.00</td> <td>0.17</td> <td>24.90</td> <td>0.15</td> <td>14.66</td> <td>2.99</td> <td>3.15</td> <td>4.99</td> <td>1.99</td> <td>2.77</td> <td>1.59</td> <td>1.57</td> <td>1.74</td> <td>1.70</td> <td>7.52</td> <td>3.25</td> <td>3.39</td> <td>1.76</td> <td>1.59</td> <td>2.07</td> <td>3.05</td> <td>3.81</td> <td>2.40</td> <td>3.30</td> <td>5.47</td> </tr> <tr> <td>Rel. Inten.(% of BP)</td> <td>0.01</td> <td>0.68</td> <td>100.00</td> <td>0.59</td> <td>58.85</td> <td>12.00</td> <td>12.64</td> <td>20.06</td> <td>8.01</td> <td>11.11</td> <td>6.40</td> <td>6.31</td> <td>7.00</td> <td>6.84</td> <td>30.19</td> <td>13.04</td> <td>13.60</td> <td>7.05</td> <td>6.39</td> <td>8.32</td> <td>12.26</td> <td>15.32</td> <td>9.64</td> <td>13.24</td> <td>21.98</td> </tr> <tr> <td>Score</td> <td>0.20</td> <td>0.50</td> <td>0.50</td> <td>1.00</td> <td>0.50</td> <td>0.50</td> <td>1.50</td> <td>0.75</td> <td>1.50</td> <td>0.75</td> <td>1.50</td> <td>0.75</td> <td>1.50</td> <td>-0.07</td> <td>1.50</td> <td>1.50</td> <td>-0.14</td> <td>0.50</td> <td>-0.06</td> <td>0.50</td> <td>-0.12</td> <td>1.50</td> <td>-0.10</td> <td>0.50</td> <td>1.50</td> </tr> <tr> <td>Ion-type</td> <td>PR</td> <td>KQ</td> <td>a<sub>1</sub></td> <td>Y</td> <td>a<sub>2</sub></td> <td>b<sub>2</sub></td> <td>b<sup>++7</sup></td> <td>y<sub>2</sub></td> <td>PTAAA</td> <td>y<sub>6</sub><sup>+2</sup></td> <td>PTAAAI</td> <td>y<sub>4</sub></td> <td>y<sub>5</sub></td> <td>y<sub>5</sub></td> <td>y<sup>++13</sup></td> <td>b<sub>7</sub></td> <td>b<sub>8</sub></td> <td>b<sub>7</sub></td> <td>b<sub>8</sub></td> <td>y<sub>15</sub><sup>+2</sup></td> <td>b<sub>9</sub></td> <td>b<sub>9</sub></td> <td>y<sub>7</sub></td> <td>y<sub>7</sub></td> </tr> <tr> <td>Delta ppm</td> <td>11.1</td> <td>-2.1</td> <td>-28.1</td> <td>-8.0</td> <td>-2.9</td> <td>-11.0</td> <td>-28.2</td> <td>1.0</td> <td>-9.6</td> <td>-11.4</td> <td>-10.5</td> <td>-13.6</td> <td>-5.7</td> <td>29.1</td> <td>-0.1</td> <td>-2.6</td> <td>-2.6</td> <td>-2.6</td> <td>-2.6</td> <td>18.3</td> <td>2.6</td> <td>2.6</td> <td>-10.2</td> <td>-10.2</td> </tr> </tbody> </table> |        |         |                |                  |                |                                        |                                 |                            |                             |                              |         |                |                   |                                                                        | Fragment-ion (m/z) | 70.066         | 84.081         | 86.095         | 136.075               | 199.181                       | 227.174               | 370.193               | 389.251        | 412.216        | 419.222 <sup>+2</sup> | 512.272 | 525.299 | 617.353 | 656.370 <sup>+2</sup> | 674.379 | 716.914 | 717.420 | 739.399 | 758.408 <sup>+2</sup> | 810.435 | 837.447 <sup>+2</sup> | 838.452 <sup>+2</sup> | 838.608 | 881.476 | 908.474 | Frac. Inten.(% of TIC) | 0.00 | 0.17 | 24.90 | 0.15 | 14.66 | 2.99 | 3.15 | 4.99 | 1.99 | 2.77 | 1.59 | 1.57 | 1.74 | 1.70 | 7.52 | 3.25 | 3.39 | 1.76 | 1.59 | 2.07 | 3.05 | 3.81 | 2.40 | 3.30 | 5.47 | Rel. Inten.(% of BP) | 0.01 | 0.68 | 100.00 | 0.59 | 58.85 | 12.00 | 12.64 | 20.06 | 8.01 | 11.11 | 6.40 | 6.31 | 7.00 | 6.84 | 30.19 | 13.04 | 13.60 | 7.05 | 6.39 | 8.32 | 12.26 | 15.32 | 9.64 | 13.24 | 21.98 | Score | 0.20 | 0.50 | 0.50 | 1.00 | 0.50 | 0.50 | 1.50 | 0.75 | 1.50 | 0.75 | 1.50 | 0.75 | 1.50 | -0.07 | 1.50 | 1.50 | -0.14 | 0.50 | -0.06 | 0.50 | -0.12 | 1.50 | -0.10 | 0.50 | 1.50 | Ion-type | PR | KQ | a <sub>1</sub> | Y | a <sub>2</sub> | b <sub>2</sub> | b <sup>++7</sup> | y <sub>2</sub> | PTAAA | y <sub>6</sub> <sup>+2</sup> | PTAAAI | y <sub>4</sub> | y <sub>5</sub> | y <sub>5</sub> | y <sup>++13</sup> | b <sub>7</sub> | b <sub>8</sub> | b <sub>7</sub> | b <sub>8</sub> | y <sub>15</sub> <sup>+2</sup> | b <sub>9</sub> | b <sub>9</sub> | y <sub>7</sub> | y <sub>7</sub> | Delta ppm | 11.1 | -2.1 | -28.1 | -8.0 | -2.9 | -11.0 | -28.2 | 1.0 | -9.6 | -11.4 | -10.5 | -13.6 | -5.7 | 29.1 | -0.1 | -2.6 | -2.6 | -2.6 | -2.6 | 18.3 | 2.6 | 2.6 | -10.2 | -10.2 |
| Fragment-ion (m/z)                                                                                                                                                                                                                                                                                                                                                                                                                                                                                                                                                                                                                                                                                                                                                                                                                                                                                                                                                                                                                                                                                                                                                                                                                                                                                                                                                                                                                                                                                                                                                                                                                                                                                                                                                                                                                                                                                                                                                                                                                                                                                                                                                                                                                                                                                                                                                                                                                                                                                                                                                                                                                                                                                                                                                                                              | 70.066 | 84.081  | 86.095         | 136.075          | 199.181        | 227.174                                | 370.193                         | 389.251                    | 412.216                     | 419.222 <sup>+2</sup>        | 512.272 | 525.299        | 617.353           | 656.370 <sup>+2</sup>                                                  | 674.379            | 716.914        | 717.420        | 739.399        | 758.408 <sup>+2</sup> | 810.435                       | 837.447 <sup>+2</sup> | 838.452 <sup>+2</sup> | 838.608        | 881.476        | 908.474               |         |         |         |                       |         |         |         |         |                       |         |                       |                       |         |         |         |                        |      |      |       |      |       |      |      |      |      |      |      |      |      |      |      |      |      |      |      |      |      |      |      |      |      |                      |      |      |        |      |       |       |       |       |      |       |      |      |      |      |       |       |       |      |      |      |       |       |      |       |       |       |      |      |      |      |      |      |      |      |      |      |      |      |      |       |      |      |       |      |       |      |       |      |       |      |      |          |    |    |                |   |                |                |                  |                |       |                              |        |                |                |                |                   |                |                |                |                |                               |                |                |                |                |           |      |      |       |      |      |       |       |     |      |       |       |       |      |      |      |      |      |      |      |      |     |     |       |       |
| Frac. Inten.(% of TIC)                                                                                                                                                                                                                                                                                                                                                                                                                                                                                                                                                                                                                                                                                                                                                                                                                                                                                                                                                                                                                                                                                                                                                                                                                                                                                                                                                                                                                                                                                                                                                                                                                                                                                                                                                                                                                                                                                                                                                                                                                                                                                                                                                                                                                                                                                                                                                                                                                                                                                                                                                                                                                                                                                                                                                                                          | 0.00   | 0.17    | 24.90          | 0.15             | 14.66          | 2.99                                   | 3.15                            | 4.99                       | 1.99                        | 2.77                         | 1.59    | 1.57           | 1.74              | 1.70                                                                   | 7.52               | 3.25           | 3.39           | 1.76           | 1.59                  | 2.07                          | 3.05                  | 3.81                  | 2.40           | 3.30           | 5.47                  |         |         |         |                       |         |         |         |         |                       |         |                       |                       |         |         |         |                        |      |      |       |      |       |      |      |      |      |      |      |      |      |      |      |      |      |      |      |      |      |      |      |      |      |                      |      |      |        |      |       |       |       |       |      |       |      |      |      |      |       |       |       |      |      |      |       |       |      |       |       |       |      |      |      |      |      |      |      |      |      |      |      |      |      |       |      |      |       |      |       |      |       |      |       |      |      |          |    |    |                |   |                |                |                  |                |       |                              |        |                |                |                |                   |                |                |                |                |                               |                |                |                |                |           |      |      |       |      |      |       |       |     |      |       |       |       |      |      |      |      |      |      |      |      |     |     |       |       |
| Rel. Inten.(% of BP)                                                                                                                                                                                                                                                                                                                                                                                                                                                                                                                                                                                                                                                                                                                                                                                                                                                                                                                                                                                                                                                                                                                                                                                                                                                                                                                                                                                                                                                                                                                                                                                                                                                                                                                                                                                                                                                                                                                                                                                                                                                                                                                                                                                                                                                                                                                                                                                                                                                                                                                                                                                                                                                                                                                                                                                            | 0.01   | 0.68    | 100.00         | 0.59             | 58.85          | 12.00                                  | 12.64                           | 20.06                      | 8.01                        | 11.11                        | 6.40    | 6.31           | 7.00              | 6.84                                                                   | 30.19              | 13.04          | 13.60          | 7.05           | 6.39                  | 8.32                          | 12.26                 | 15.32                 | 9.64           | 13.24          | 21.98                 |         |         |         |                       |         |         |         |         |                       |         |                       |                       |         |         |         |                        |      |      |       |      |       |      |      |      |      |      |      |      |      |      |      |      |      |      |      |      |      |      |      |      |      |                      |      |      |        |      |       |       |       |       |      |       |      |      |      |      |       |       |       |      |      |      |       |       |      |       |       |       |      |      |      |      |      |      |      |      |      |      |      |      |      |       |      |      |       |      |       |      |       |      |       |      |      |          |    |    |                |   |                |                |                  |                |       |                              |        |                |                |                |                   |                |                |                |                |                               |                |                |                |                |           |      |      |       |      |      |       |       |     |      |       |       |       |      |      |      |      |      |      |      |      |     |     |       |       |
| Score                                                                                                                                                                                                                                                                                                                                                                                                                                                                                                                                                                                                                                                                                                                                                                                                                                                                                                                                                                                                                                                                                                                                                                                                                                                                                                                                                                                                                                                                                                                                                                                                                                                                                                                                                                                                                                                                                                                                                                                                                                                                                                                                                                                                                                                                                                                                                                                                                                                                                                                                                                                                                                                                                                                                                                                                           | 0.20   | 0.50    | 0.50           | 1.00             | 0.50           | 0.50                                   | 1.50                            | 0.75                       | 1.50                        | 0.75                         | 1.50    | 0.75           | 1.50              | -0.07                                                                  | 1.50               | 1.50           | -0.14          | 0.50           | -0.06                 | 0.50                          | -0.12                 | 1.50                  | -0.10          | 0.50           | 1.50                  |         |         |         |                       |         |         |         |         |                       |         |                       |                       |         |         |         |                        |      |      |       |      |       |      |      |      |      |      |      |      |      |      |      |      |      |      |      |      |      |      |      |      |      |                      |      |      |        |      |       |       |       |       |      |       |      |      |      |      |       |       |       |      |      |      |       |       |      |       |       |       |      |      |      |      |      |      |      |      |      |      |      |      |      |       |      |      |       |      |       |      |       |      |       |      |      |          |    |    |                |   |                |                |                  |                |       |                              |        |                |                |                |                   |                |                |                |                |                               |                |                |                |                |           |      |      |       |      |      |       |       |     |      |       |       |       |      |      |      |      |      |      |      |      |     |     |       |       |
| Ion-type                                                                                                                                                                                                                                                                                                                                                                                                                                                                                                                                                                                                                                                                                                                                                                                                                                                                                                                                                                                                                                                                                                                                                                                                                                                                                                                                                                                                                                                                                                                                                                                                                                                                                                                                                                                                                                                                                                                                                                                                                                                                                                                                                                                                                                                                                                                                                                                                                                                                                                                                                                                                                                                                                                                                                                                                        | PR     | KQ      | a <sub>1</sub> | Y                | a <sub>2</sub> | b <sub>2</sub>                         | b <sup>++7</sup>                | y <sub>2</sub>             | PTAAA                       | y <sub>6</sub> <sup>+2</sup> | PTAAAI  | y <sub>4</sub> | y <sub>5</sub>    | y <sub>5</sub>                                                         | y <sup>++13</sup>  | b <sub>7</sub> | b <sub>8</sub> | b <sub>7</sub> | b <sub>8</sub>        | y <sub>15</sub> <sup>+2</sup> | b <sub>9</sub>        | b <sub>9</sub>        | y <sub>7</sub> | y <sub>7</sub> |                       |         |         |         |                       |         |         |         |         |                       |         |                       |                       |         |         |         |                        |      |      |       |      |       |      |      |      |      |      |      |      |      |      |      |      |      |      |      |      |      |      |      |      |      |                      |      |      |        |      |       |       |       |       |      |       |      |      |      |      |       |       |       |      |      |      |       |       |      |       |       |       |      |      |      |      |      |      |      |      |      |      |      |      |      |       |      |      |       |      |       |      |       |      |       |      |      |          |    |    |                |   |                |                |                  |                |       |                              |        |                |                |                |                   |                |                |                |                |                               |                |                |                |                |           |      |      |       |      |      |       |       |     |      |       |       |       |      |      |      |      |      |      |      |      |     |     |       |       |
| Delta ppm                                                                                                                                                                                                                                                                                                                                                                                                                                                                                                                                                                                                                                                                                                                                                                                                                                                                                                                                                                                                                                                                                                                                                                                                                                                                                                                                                                                                                                                                                                                                                                                                                                                                                                                                                                                                                                                                                                                                                                                                                                                                                                                                                                                                                                                                                                                                                                                                                                                                                                                                                                                                                                                                                                                                                                                                       | 11.1   | -2.1    | -28.1          | -8.0             | -2.9           | -11.0                                  | -28.2                           | 1.0                        | -9.6                        | -11.4                        | -10.5   | -13.6          | -5.7              | 29.1                                                                   | -0.1               | -2.6           | -2.6           | -2.6           | -2.6                  | 18.3                          | 2.6                   | 2.6                   | -10.2          | -10.2          |                       |         |         |         |                       |         |         |         |         |                       |         |                       |                       |         |         |         |                        |      |      |       |      |       |      |      |      |      |      |      |      |      |      |      |      |      |      |      |      |      |      |      |      |      |                      |      |      |        |      |       |       |       |       |      |       |      |      |      |      |       |       |       |      |      |      |       |       |      |       |       |       |      |      |      |      |      |      |      |      |      |      |      |      |      |       |      |      |       |      |       |      |       |      |       |      |      |          |    |    |                |   |                |                |                  |                |       |                              |        |                |                |                |                   |                |                |                |                |                               |                |                |                |                |           |      |      |       |      |      |       |       |     |      |       |       |       |      |      |      |      |      |      |      |      |     |     |       |       |

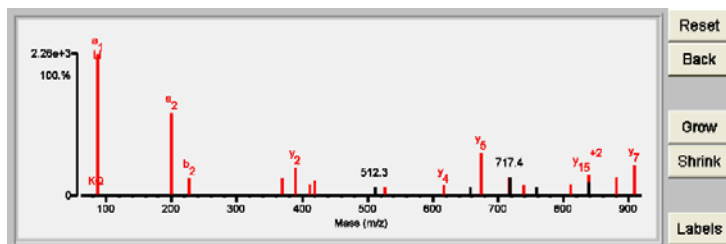

Result Summary

| Rank | Score | SPI (%) | BCS | # Unmatched Ions | Variable sites | Sequence            | MH <sup>+</sup> Calculated (Da) | MH <sup>+</sup> Error (Da) | MH <sup>+</sup> Error (ppm) | Protein MW/pi (Da) | Species | Accession # | Protein Name                                                                    |
|------|-------|---------|-----|------------------|----------------|---------------------|---------------------------------|----------------------------|-----------------------------|--------------------|---------|-------------|---------------------------------------------------------------------------------|
| 1    | 13.40 | 66.8    | 7   | 11/25            | K350k          | (R)SSGPYGGGGYFAK(N) | 1628.7816                       | 114.0567                   | 7.9                         | 38846.0/9.26       | HUMAN   | P09651      | Heterogeneous nuclear ribonucleoprotein A1 OS=Homo sapiens GN=HNRNPA1 PE=1 SV=4 |

Detailed Results

| Rank | Score | SPI (%) | BCS | # Unmatched Ions | Variable sites | Sequence            | MH <sup>+</sup> Calculated (Da) | MH <sup>+</sup> Error (Da) | MH <sup>+</sup> Error (ppm) | Protein MW/pi (Da) | Species | Accession # | MS-Digest Index # | Protein Name                                                                    |
|------|-------|---------|-----|------------------|----------------|---------------------|---------------------------------|----------------------------|-----------------------------|--------------------|---------|-------------|-------------------|---------------------------------------------------------------------------------|
| 1    | 13.40 | 66.8    | 7   | 11/25            | K350k          | (R)SSGPYGGGGYFAK(N) | 1628.7816                       | 114.0567                   | 7.9                         | 38846.0/9.26       | HUMAN   | P09651      | 645661            | Heterogeneous nuclear ribonucleoprotein A1 OS=Homo sapiens GN=HNRNPA1 PE=1 SV=4 |

  

| Fragment-ion (m/z)      | 60.043 | 75.053 | 86.098 | 120.083 | 130.074 | 136.075 | 157.060                          | 175.115 | 229.635 | 258.137 | 272.171 | 357.142 | 375.163 | 508.226 | 514.309 | 562.271 | 585.345 | 624.294 | 650.289 | 685.362 | 707.852 <sup>+2</sup>         | 720.372 <sup>+2</sup> | 732.421 | 747.293 | 895.477 |
|-------------------------|--------|--------|--------|---------|---------|---------|----------------------------------|---------|---------|---------|---------|---------|---------|---------|---------|---------|---------|---------|---------|---------|-------------------------------|-----------------------|---------|---------|---------|
| Frac. Inten. (% of TIC) | 2.97   | 2.72   | 4.50   | 0.30    | 2.78    | 0.38    | 4.75                             | 4.18    | 2.70    | 2.67    | 8.47    | 3.50    | 4.34    | 4.05    | 7.43    | 2.78    | 15.82   | 2.34    | 2.87    | 2.43    | 2.79                          | 2.98                  | 6.65    | 2.72    | 2.86    |
| Rel. Inten. (% of BP)   | 18.75  | 17.21  | 28.48  | 1.87    | 17.59   | 2.40    | 30.01                            | 26.42   | 17.09   | 16.90   | 53.57   | 22.16   | 27.41   | 25.64   | 47.01   | 17.61   | 100.00  | 14.82   | 18.14   | 15.39   | 17.66                         | 18.85                 | 42.04   | 17.22   | 18.07   |
| Score                   | 0.50   | -0.17  | -0.28  | 1.00    | -0.18   | 1.00    | 0.25                             | 1.50    | -0.17   | -0.17   | 1.50    | 0.75    | -0.75   | -0.26   | 1.50    | -0.18   | 1.50    | 0.75    | -0.18   | -0.15   | 1.50                          | -0.19                 | 1.50    | -0.17   | 1.50    |
| Ion-type                | a1     |        |        | F       |         | Y       | b <sub>2</sub> -H <sub>2</sub> O | y1      |         |         | y2      | GGGQ    | PYGG    |         | y3      |         | y4      |         |         |         | y1 <sub>2</sub> <sup>+2</sup> |                       | ys      |         | y6      |
| Delta ppm               | -36.4  |        |        | 19.4    |         | -5.8    | -13.8                            | -23.7   |         |         | -1.2    | -31.1   | -12.5   |         | -1.6    |         | -2.9    | -34.2   |         |         | 8.0                           |                       | 8.6     |         | -2.0    |

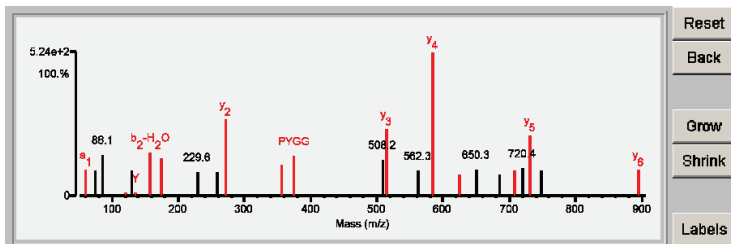

Result Summary

| Rank | Score | SPI (%) | BCS | # Unmatched Ions | Variable sites | Sequence              | MH <sup>+</sup> Calculated (Da) | MH <sup>+</sup> Error (Da) | MH <sup>+</sup> Error (ppm) | Protein MW/pI (Da) | Species | Accession # | Protein Name                                                                    |
|------|-------|---------|-----|------------------|----------------|-----------------------|---------------------------------|----------------------------|-----------------------------|--------------------|---------|-------------|---------------------------------------------------------------------------------|
| 1    | 13.18 | 67.4    | 7   | 10/25            | K57k           | (R)EHFEKWGTLDCVVMR(D) | 2007.9415                       | 114.0578                   | 7.0                         | 39595.1/9.09       | HUMAN   | P51991      | Heterogeneous nuclear ribonucleoprotein A3 OS=Homo sapiens GN=HNRNPA3 PE=1 SV=2 |

Detailed Results

| Rank                                                                                                                                                                                                                                                                                                                                                                                                                                                                                                                                                                                                                                                                                                                                                                                                                                                                                                                                                                                                                                                                                                                                                                                                                                                                                                                                                                                                                                                                                                                                                                                                                                                                                                                                                                                                                                                                                                                                                                                                                                                                                                                                                                                                                                                                                                                                                                                                                                                                                                                                                                                                                                                                                                                                                                                                                                                                                                                                                                                                                                                     | Score  | SPI (%) | BCS    | # Unmatched Ions | Variable sites | Sequence                                   | MH <sup>+</sup> Calculated (Da) | MH <sup>+</sup> Error (Da) | MH <sup>+</sup> Error (ppm) | Protein MW/pI (Da) | Species | Accession # | MS-Digest Index # | Protein Name                                                                    |                                  |                |                                 |                |         |                |                       |                       |                       |                       |         |         |         |         |         |         |         |         |         |         |         |         |                       |         |                       |         |                        |      |      |      |      |      |      |      |      |      |      |      |      |      |      |      |      |      |      |      |       |      |                       |         |                       |         |                      |      |      |       |       |      |      |       |       |      |       |       |       |       |       |       |       |       |       |       |        |       |                       |         |                       |         |       |      |      |       |       |      |      |       |       |      |       |      |       |      |       |      |      |      |      |       |      |      |                       |         |                       |         |          |    |   |  |  |    |   |  |  |   |  |    |  |                  |  |                                  |                |                                 |                |  |                |                       |         |                       |         |           |       |       |  |  |      |       |  |  |     |  |      |  |     |  |      |      |       |     |  |      |                       |         |                       |         |  |  |  |  |  |  |  |  |  |  |  |  |  |  |  |  |  |  |  |  |  |      |  |  |  |  |
|----------------------------------------------------------------------------------------------------------------------------------------------------------------------------------------------------------------------------------------------------------------------------------------------------------------------------------------------------------------------------------------------------------------------------------------------------------------------------------------------------------------------------------------------------------------------------------------------------------------------------------------------------------------------------------------------------------------------------------------------------------------------------------------------------------------------------------------------------------------------------------------------------------------------------------------------------------------------------------------------------------------------------------------------------------------------------------------------------------------------------------------------------------------------------------------------------------------------------------------------------------------------------------------------------------------------------------------------------------------------------------------------------------------------------------------------------------------------------------------------------------------------------------------------------------------------------------------------------------------------------------------------------------------------------------------------------------------------------------------------------------------------------------------------------------------------------------------------------------------------------------------------------------------------------------------------------------------------------------------------------------------------------------------------------------------------------------------------------------------------------------------------------------------------------------------------------------------------------------------------------------------------------------------------------------------------------------------------------------------------------------------------------------------------------------------------------------------------------------------------------------------------------------------------------------------------------------------------------------------------------------------------------------------------------------------------------------------------------------------------------------------------------------------------------------------------------------------------------------------------------------------------------------------------------------------------------------------------------------------------------------------------------------------------------------|--------|---------|--------|------------------|----------------|--------------------------------------------|---------------------------------|----------------------------|-----------------------------|--------------------|---------|-------------|-------------------|---------------------------------------------------------------------------------|----------------------------------|----------------|---------------------------------|----------------|---------|----------------|-----------------------|-----------------------|-----------------------|-----------------------|---------|---------|---------|---------|---------|---------|---------|---------|---------|---------|---------|---------|-----------------------|---------|-----------------------|---------|------------------------|------|------|------|------|------|------|------|------|------|------|------|------|------|------|------|------|------|------|------|-------|------|-----------------------|---------|-----------------------|---------|----------------------|------|------|-------|-------|------|------|-------|-------|------|-------|-------|-------|-------|-------|-------|-------|-------|-------|-------|--------|-------|-----------------------|---------|-----------------------|---------|-------|------|------|-------|-------|------|------|-------|-------|------|-------|------|-------|------|-------|------|------|------|------|-------|------|------|-----------------------|---------|-----------------------|---------|----------|----|---|--|--|----|---|--|--|---|--|----|--|------------------|--|----------------------------------|----------------|---------------------------------|----------------|--|----------------|-----------------------|---------|-----------------------|---------|-----------|-------|-------|--|--|------|-------|--|--|-----|--|------|--|-----|--|------|------|-------|-----|--|------|-----------------------|---------|-----------------------|---------|--|--|--|--|--|--|--|--|--|--|--|--|--|--|--|--|--|--|--|--|--|------|--|--|--|--|
| 1                                                                                                                                                                                                                                                                                                                                                                                                                                                                                                                                                                                                                                                                                                                                                                                                                                                                                                                                                                                                                                                                                                                                                                                                                                                                                                                                                                                                                                                                                                                                                                                                                                                                                                                                                                                                                                                                                                                                                                                                                                                                                                                                                                                                                                                                                                                                                                                                                                                                                                                                                                                                                                                                                                                                                                                                                                                                                                                                                                                                                                                        | 13.18  | 67.4    | 7      | 10/25            | K57k           | (R)E H F E K W G T L T D C / V / V M R (D) | 2007.9415                       | 114.0578                   | 7.0                         | 39595.1/9.09       | HUMAN   | P51991      | 645687            | Heterogeneous nuclear ribonucleoprotein A3 OS=Homo sapiens GN=HNRNPA3 PE=1 SV=2 |                                  |                |                                 |                |         |                |                       |                       |                       |                       |         |         |         |         |         |         |         |         |         |         |         |         |                       |         |                       |         |                        |      |      |      |      |      |      |      |      |      |      |      |      |      |      |      |      |      |      |      |       |      |                       |         |                       |         |                      |      |      |       |       |      |      |       |       |      |       |       |       |       |       |       |       |       |       |       |        |       |                       |         |                       |         |       |      |      |       |       |      |      |       |       |      |       |      |       |      |       |      |      |      |      |       |      |      |                       |         |                       |         |          |    |   |  |  |    |   |  |  |   |  |    |  |                  |  |                                  |                |                                 |                |  |                |                       |         |                       |         |           |       |       |  |  |      |       |  |  |     |  |      |  |     |  |      |      |       |     |  |      |                       |         |                       |         |  |  |  |  |  |  |  |  |  |  |  |  |  |  |  |  |  |  |  |  |  |      |  |  |  |  |
| <table border="1"> <thead> <tr> <th>Fragment-ion (m/z)</th> <th>70.063</th> <th>72.080</th> <th>74.058</th> <th>84.080</th> <th>86.096</th> <th>110.070</th> <th>116.016</th> <th>133.048</th> <th>159.092</th> <th>173.128</th> <th>175.118</th> <th>187.143</th> <th>203.118</th> <th>221.103</th> <th>249.098</th> <th>267.108</th> <th>289.128</th> <th>306.161</th> <th>329.183</th> <th>405.226</th> <th>414.177</th> <th>463.200<sup>+2</sup></th> <th>504.288</th> <th>506.254<sup>+2</sup></th> <th>664.320</th> </tr> </thead> <tbody> <tr> <td>Frac. Inten.(% of TIC)</td> <td>0.00</td> <td>0.63</td> <td>2.62</td> <td>3.98</td> <td>0.30</td> <td>0.14</td> <td>3.99</td> <td>2.94</td> <td>0.08</td> <td>3.28</td> <td>8.02</td> <td>4.02</td> <td>3.26</td> <td>2.83</td> <td>3.88</td> <td>4.70</td> <td>3.00</td> <td>9.41</td> <td>2.65</td> <td>18.75</td> <td>4.01</td> <td>463.200<sup>+2</sup></td> <td>504.288</td> <td>506.254<sup>+2</sup></td> <td>664.320</td> </tr> <tr> <td>Rel. Inten.(% of BP)</td> <td>0.02</td> <td>3.37</td> <td>13.99</td> <td>21.24</td> <td>1.62</td> <td>0.75</td> <td>21.27</td> <td>15.69</td> <td>0.43</td> <td>17.52</td> <td>42.80</td> <td>21.42</td> <td>17.42</td> <td>15.10</td> <td>20.67</td> <td>25.06</td> <td>15.98</td> <td>50.19</td> <td>14.12</td> <td>100.00</td> <td>21.37</td> <td>463.200<sup>+2</sup></td> <td>504.288</td> <td>506.254<sup>+2</sup></td> <td>664.320</td> </tr> <tr> <td>Score</td> <td>0.20</td> <td>0.50</td> <td>-0.14</td> <td>-0.21</td> <td>0.22</td> <td>1.00</td> <td>-0.21</td> <td>-0.16</td> <td>2.00</td> <td>-0.18</td> <td>1.50</td> <td>-0.21</td> <td>1.50</td> <td>-0.15</td> <td>0.25</td> <td>0.50</td> <td>0.50</td> <td>1.50</td> <td>-0.14</td> <td>1.50</td> <td>0.75</td> <td>463.200<sup>+2</sup></td> <td>504.288</td> <td>506.254<sup>+2</sup></td> <td>664.320</td> </tr> <tr> <td>Ion-type</td> <td>PR</td> <td>V</td> <td></td> <td></td> <td>LI</td> <td>H</td> <td></td> <td></td> <td>W</td> <td></td> <td>Y1</td> <td></td> <td>Y<sup>++3</sup></td> <td></td> <td>b<sub>2</sub>-H<sub>2</sub>O</td> <td>b<sub>2</sub></td> <td>Y<sub>2</sub>-NH<sub>3</sub></td> <td>Y<sub>2</sub></td> <td></td> <td>Y<sub>3</sub></td> <td>463.200<sup>+2</sup></td> <td>504.288</td> <td>506.254<sup>+2</sup></td> <td>664.320</td> </tr> <tr> <td>Delta ppm</td> <td>-37.5</td> <td>-16.3</td> <td></td> <td></td> <td>-8.4</td> <td>-11.6</td> <td></td> <td></td> <td>2.7</td> <td></td> <td>-7.7</td> <td></td> <td>2.6</td> <td></td> <td>-4.9</td> <td>-7.0</td> <td>-15.5</td> <td>5.1</td> <td></td> <td>-5.6</td> <td>463.200<sup>+2</sup></td> <td>504.288</td> <td>506.254<sup>+2</sup></td> <td>664.320</td> </tr> <tr> <td></td> <td>-4.1</td> <td></td> <td></td> <td></td> <td></td> </tr> </tbody> </table> |        |         |        |                  |                |                                            |                                 |                            |                             |                    |         |             |                   |                                                                                 | Fragment-ion (m/z)               | 70.063         | 72.080                          | 74.058         | 84.080  | 86.096         | 110.070               | 116.016               | 133.048               | 159.092               | 173.128 | 175.118 | 187.143 | 203.118 | 221.103 | 249.098 | 267.108 | 289.128 | 306.161 | 329.183 | 405.226 | 414.177 | 463.200 <sup>+2</sup> | 504.288 | 506.254 <sup>+2</sup> | 664.320 | Frac. Inten.(% of TIC) | 0.00 | 0.63 | 2.62 | 3.98 | 0.30 | 0.14 | 3.99 | 2.94 | 0.08 | 3.28 | 8.02 | 4.02 | 3.26 | 2.83 | 3.88 | 4.70 | 3.00 | 9.41 | 2.65 | 18.75 | 4.01 | 463.200 <sup>+2</sup> | 504.288 | 506.254 <sup>+2</sup> | 664.320 | Rel. Inten.(% of BP) | 0.02 | 3.37 | 13.99 | 21.24 | 1.62 | 0.75 | 21.27 | 15.69 | 0.43 | 17.52 | 42.80 | 21.42 | 17.42 | 15.10 | 20.67 | 25.06 | 15.98 | 50.19 | 14.12 | 100.00 | 21.37 | 463.200 <sup>+2</sup> | 504.288 | 506.254 <sup>+2</sup> | 664.320 | Score | 0.20 | 0.50 | -0.14 | -0.21 | 0.22 | 1.00 | -0.21 | -0.16 | 2.00 | -0.18 | 1.50 | -0.21 | 1.50 | -0.15 | 0.25 | 0.50 | 0.50 | 1.50 | -0.14 | 1.50 | 0.75 | 463.200 <sup>+2</sup> | 504.288 | 506.254 <sup>+2</sup> | 664.320 | Ion-type | PR | V |  |  | LI | H |  |  | W |  | Y1 |  | Y <sup>++3</sup> |  | b <sub>2</sub> -H <sub>2</sub> O | b <sub>2</sub> | Y <sub>2</sub> -NH <sub>3</sub> | Y <sub>2</sub> |  | Y <sub>3</sub> | 463.200 <sup>+2</sup> | 504.288 | 506.254 <sup>+2</sup> | 664.320 | Delta ppm | -37.5 | -16.3 |  |  | -8.4 | -11.6 |  |  | 2.7 |  | -7.7 |  | 2.6 |  | -4.9 | -7.0 | -15.5 | 5.1 |  | -5.6 | 463.200 <sup>+2</sup> | 504.288 | 506.254 <sup>+2</sup> | 664.320 |  |  |  |  |  |  |  |  |  |  |  |  |  |  |  |  |  |  |  |  |  | -4.1 |  |  |  |  |
| Fragment-ion (m/z)                                                                                                                                                                                                                                                                                                                                                                                                                                                                                                                                                                                                                                                                                                                                                                                                                                                                                                                                                                                                                                                                                                                                                                                                                                                                                                                                                                                                                                                                                                                                                                                                                                                                                                                                                                                                                                                                                                                                                                                                                                                                                                                                                                                                                                                                                                                                                                                                                                                                                                                                                                                                                                                                                                                                                                                                                                                                                                                                                                                                                                       | 70.063 | 72.080  | 74.058 | 84.080           | 86.096         | 110.070                                    | 116.016                         | 133.048                    | 159.092                     | 173.128            | 175.118 | 187.143     | 203.118           | 221.103                                                                         | 249.098                          | 267.108        | 289.128                         | 306.161        | 329.183 | 405.226        | 414.177               | 463.200 <sup>+2</sup> | 504.288               | 506.254 <sup>+2</sup> | 664.320 |         |         |         |         |         |         |         |         |         |         |         |                       |         |                       |         |                        |      |      |      |      |      |      |      |      |      |      |      |      |      |      |      |      |      |      |      |       |      |                       |         |                       |         |                      |      |      |       |       |      |      |       |       |      |       |       |       |       |       |       |       |       |       |       |        |       |                       |         |                       |         |       |      |      |       |       |      |      |       |       |      |       |      |       |      |       |      |      |      |      |       |      |      |                       |         |                       |         |          |    |   |  |  |    |   |  |  |   |  |    |  |                  |  |                                  |                |                                 |                |  |                |                       |         |                       |         |           |       |       |  |  |      |       |  |  |     |  |      |  |     |  |      |      |       |     |  |      |                       |         |                       |         |  |  |  |  |  |  |  |  |  |  |  |  |  |  |  |  |  |  |  |  |  |      |  |  |  |  |
| Frac. Inten.(% of TIC)                                                                                                                                                                                                                                                                                                                                                                                                                                                                                                                                                                                                                                                                                                                                                                                                                                                                                                                                                                                                                                                                                                                                                                                                                                                                                                                                                                                                                                                                                                                                                                                                                                                                                                                                                                                                                                                                                                                                                                                                                                                                                                                                                                                                                                                                                                                                                                                                                                                                                                                                                                                                                                                                                                                                                                                                                                                                                                                                                                                                                                   | 0.00   | 0.63    | 2.62   | 3.98             | 0.30           | 0.14                                       | 3.99                            | 2.94                       | 0.08                        | 3.28               | 8.02    | 4.02        | 3.26              | 2.83                                                                            | 3.88                             | 4.70           | 3.00                            | 9.41           | 2.65    | 18.75          | 4.01                  | 463.200 <sup>+2</sup> | 504.288               | 506.254 <sup>+2</sup> | 664.320 |         |         |         |         |         |         |         |         |         |         |         |                       |         |                       |         |                        |      |      |      |      |      |      |      |      |      |      |      |      |      |      |      |      |      |      |      |       |      |                       |         |                       |         |                      |      |      |       |       |      |      |       |       |      |       |       |       |       |       |       |       |       |       |       |        |       |                       |         |                       |         |       |      |      |       |       |      |      |       |       |      |       |      |       |      |       |      |      |      |      |       |      |      |                       |         |                       |         |          |    |   |  |  |    |   |  |  |   |  |    |  |                  |  |                                  |                |                                 |                |  |                |                       |         |                       |         |           |       |       |  |  |      |       |  |  |     |  |      |  |     |  |      |      |       |     |  |      |                       |         |                       |         |  |  |  |  |  |  |  |  |  |  |  |  |  |  |  |  |  |  |  |  |  |      |  |  |  |  |
| Rel. Inten.(% of BP)                                                                                                                                                                                                                                                                                                                                                                                                                                                                                                                                                                                                                                                                                                                                                                                                                                                                                                                                                                                                                                                                                                                                                                                                                                                                                                                                                                                                                                                                                                                                                                                                                                                                                                                                                                                                                                                                                                                                                                                                                                                                                                                                                                                                                                                                                                                                                                                                                                                                                                                                                                                                                                                                                                                                                                                                                                                                                                                                                                                                                                     | 0.02   | 3.37    | 13.99  | 21.24            | 1.62           | 0.75                                       | 21.27                           | 15.69                      | 0.43                        | 17.52              | 42.80   | 21.42       | 17.42             | 15.10                                                                           | 20.67                            | 25.06          | 15.98                           | 50.19          | 14.12   | 100.00         | 21.37                 | 463.200 <sup>+2</sup> | 504.288               | 506.254 <sup>+2</sup> | 664.320 |         |         |         |         |         |         |         |         |         |         |         |                       |         |                       |         |                        |      |      |      |      |      |      |      |      |      |      |      |      |      |      |      |      |      |      |      |       |      |                       |         |                       |         |                      |      |      |       |       |      |      |       |       |      |       |       |       |       |       |       |       |       |       |       |        |       |                       |         |                       |         |       |      |      |       |       |      |      |       |       |      |       |      |       |      |       |      |      |      |      |       |      |      |                       |         |                       |         |          |    |   |  |  |    |   |  |  |   |  |    |  |                  |  |                                  |                |                                 |                |  |                |                       |         |                       |         |           |       |       |  |  |      |       |  |  |     |  |      |  |     |  |      |      |       |     |  |      |                       |         |                       |         |  |  |  |  |  |  |  |  |  |  |  |  |  |  |  |  |  |  |  |  |  |      |  |  |  |  |
| Score                                                                                                                                                                                                                                                                                                                                                                                                                                                                                                                                                                                                                                                                                                                                                                                                                                                                                                                                                                                                                                                                                                                                                                                                                                                                                                                                                                                                                                                                                                                                                                                                                                                                                                                                                                                                                                                                                                                                                                                                                                                                                                                                                                                                                                                                                                                                                                                                                                                                                                                                                                                                                                                                                                                                                                                                                                                                                                                                                                                                                                                    | 0.20   | 0.50    | -0.14  | -0.21            | 0.22           | 1.00                                       | -0.21                           | -0.16                      | 2.00                        | -0.18              | 1.50    | -0.21       | 1.50              | -0.15                                                                           | 0.25                             | 0.50           | 0.50                            | 1.50           | -0.14   | 1.50           | 0.75                  | 463.200 <sup>+2</sup> | 504.288               | 506.254 <sup>+2</sup> | 664.320 |         |         |         |         |         |         |         |         |         |         |         |                       |         |                       |         |                        |      |      |      |      |      |      |      |      |      |      |      |      |      |      |      |      |      |      |      |       |      |                       |         |                       |         |                      |      |      |       |       |      |      |       |       |      |       |       |       |       |       |       |       |       |       |       |        |       |                       |         |                       |         |       |      |      |       |       |      |      |       |       |      |       |      |       |      |       |      |      |      |      |       |      |      |                       |         |                       |         |          |    |   |  |  |    |   |  |  |   |  |    |  |                  |  |                                  |                |                                 |                |  |                |                       |         |                       |         |           |       |       |  |  |      |       |  |  |     |  |      |  |     |  |      |      |       |     |  |      |                       |         |                       |         |  |  |  |  |  |  |  |  |  |  |  |  |  |  |  |  |  |  |  |  |  |      |  |  |  |  |
| Ion-type                                                                                                                                                                                                                                                                                                                                                                                                                                                                                                                                                                                                                                                                                                                                                                                                                                                                                                                                                                                                                                                                                                                                                                                                                                                                                                                                                                                                                                                                                                                                                                                                                                                                                                                                                                                                                                                                                                                                                                                                                                                                                                                                                                                                                                                                                                                                                                                                                                                                                                                                                                                                                                                                                                                                                                                                                                                                                                                                                                                                                                                 | PR     | V       |        |                  | LI             | H                                          |                                 |                            | W                           |                    | Y1      |             | Y <sup>++3</sup>  |                                                                                 | b <sub>2</sub> -H <sub>2</sub> O | b <sub>2</sub> | Y <sub>2</sub> -NH <sub>3</sub> | Y <sub>2</sub> |         | Y <sub>3</sub> | 463.200 <sup>+2</sup> | 504.288               | 506.254 <sup>+2</sup> | 664.320               |         |         |         |         |         |         |         |         |         |         |         |         |                       |         |                       |         |                        |      |      |      |      |      |      |      |      |      |      |      |      |      |      |      |      |      |      |      |       |      |                       |         |                       |         |                      |      |      |       |       |      |      |       |       |      |       |       |       |       |       |       |       |       |       |       |        |       |                       |         |                       |         |       |      |      |       |       |      |      |       |       |      |       |      |       |      |       |      |      |      |      |       |      |      |                       |         |                       |         |          |    |   |  |  |    |   |  |  |   |  |    |  |                  |  |                                  |                |                                 |                |  |                |                       |         |                       |         |           |       |       |  |  |      |       |  |  |     |  |      |  |     |  |      |      |       |     |  |      |                       |         |                       |         |  |  |  |  |  |  |  |  |  |  |  |  |  |  |  |  |  |  |  |  |  |      |  |  |  |  |
| Delta ppm                                                                                                                                                                                                                                                                                                                                                                                                                                                                                                                                                                                                                                                                                                                                                                                                                                                                                                                                                                                                                                                                                                                                                                                                                                                                                                                                                                                                                                                                                                                                                                                                                                                                                                                                                                                                                                                                                                                                                                                                                                                                                                                                                                                                                                                                                                                                                                                                                                                                                                                                                                                                                                                                                                                                                                                                                                                                                                                                                                                                                                                | -37.5  | -16.3   |        |                  | -8.4           | -11.6                                      |                                 |                            | 2.7                         |                    | -7.7    |             | 2.6               |                                                                                 | -4.9                             | -7.0           | -15.5                           | 5.1            |         | -5.6           | 463.200 <sup>+2</sup> | 504.288               | 506.254 <sup>+2</sup> | 664.320               |         |         |         |         |         |         |         |         |         |         |         |         |                       |         |                       |         |                        |      |      |      |      |      |      |      |      |      |      |      |      |      |      |      |      |      |      |      |       |      |                       |         |                       |         |                      |      |      |       |       |      |      |       |       |      |       |       |       |       |       |       |       |       |       |       |        |       |                       |         |                       |         |       |      |      |       |       |      |      |       |       |      |       |      |       |      |       |      |      |      |      |       |      |      |                       |         |                       |         |          |    |   |  |  |    |   |  |  |   |  |    |  |                  |  |                                  |                |                                 |                |  |                |                       |         |                       |         |           |       |       |  |  |      |       |  |  |     |  |      |  |     |  |      |      |       |     |  |      |                       |         |                       |         |  |  |  |  |  |  |  |  |  |  |  |  |  |  |  |  |  |  |  |  |  |      |  |  |  |  |
|                                                                                                                                                                                                                                                                                                                                                                                                                                                                                                                                                                                                                                                                                                                                                                                                                                                                                                                                                                                                                                                                                                                                                                                                                                                                                                                                                                                                                                                                                                                                                                                                                                                                                                                                                                                                                                                                                                                                                                                                                                                                                                                                                                                                                                                                                                                                                                                                                                                                                                                                                                                                                                                                                                                                                                                                                                                                                                                                                                                                                                                          |        |         |        |                  |                |                                            |                                 |                            |                             |                    |         |             |                   |                                                                                 |                                  |                |                                 |                |         |                | -4.1                  |                       |                       |                       |         |         |         |         |         |         |         |         |         |         |         |         |                       |         |                       |         |                        |      |      |      |      |      |      |      |      |      |      |      |      |      |      |      |      |      |      |      |       |      |                       |         |                       |         |                      |      |      |       |       |      |      |       |       |      |       |       |       |       |       |       |       |       |       |       |        |       |                       |         |                       |         |       |      |      |       |       |      |      |       |       |      |       |      |       |      |       |      |      |      |      |       |      |      |                       |         |                       |         |          |    |   |  |  |    |   |  |  |   |  |    |  |                  |  |                                  |                |                                 |                |  |                |                       |         |                       |         |           |       |       |  |  |      |       |  |  |     |  |      |  |     |  |      |      |       |     |  |      |                       |         |                       |         |  |  |  |  |  |  |  |  |  |  |  |  |  |  |  |  |  |  |  |  |  |      |  |  |  |  |

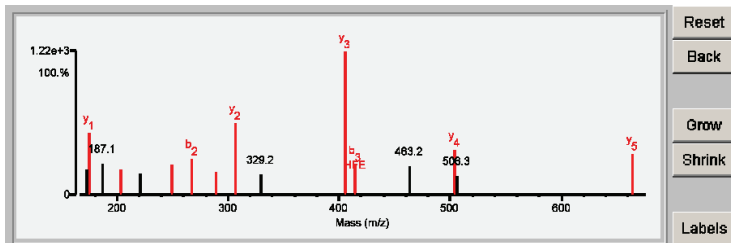

Reset  
Back  
Grow  
Shrink  
Labels

Result Summary

| Rank | Score | SPI (%) | BCS | # Unmatched Ions | Variable sites | Sequence               | MH <sup>+</sup> Calculated (Da) | MH <sup>+</sup> Error (Da) | MH <sup>+</sup> Error (ppm) | Protein MW/pI (Da) | Species | Accession # | Protein Name                                                                   |
|------|-------|---------|-----|------------------|----------------|------------------------|---------------------------------|----------------------------|-----------------------------|--------------------|---------|-------------|--------------------------------------------------------------------------------|
| 1    | 20.93 | 87.4    | 9   | 5/25             | K197k          | (K)IFVGLSPDTPEEK(R)(E) | 1757.9432                       | 114.0552                   | 6.6                         | 38434.4/7.61       | HUMAN   | Q14103      | Heterogeneous nuclear ribonucleoprotein D0 OS=Homo sapiens GN=HNRNPD PE=1 SV=1 |

Detailed Results

| Rank                                                                                                                                                                                                                                                                                                                                                                                                                                                                                                                                                                                                                                                                                                                                                                                                                                                                                                                                                                                                                                                                                                                                                                                                                                                                                                                                                                                                                                                                                                                                                                                                                                                                                                                                                                                                                                                                                                                                                                                                                                                                                                                                                                                                                                                                                                                                                                                                                                                                                                                                                                                                                                                                                                                                                                                                                                                                                                                                                                                                                              | Score  | SPI (%) | BCS    | # Unmatched Ions | Variable sites | Sequence               | MH <sup>+</sup> Calculated (Da) | MH <sup>+</sup> Error (Da) | MH <sup>+</sup> Error (ppm) | Protein MW/pI (Da) | Species | Accession #           | MS-Digest Index # | Protein Name                                                                   |                       |                       |                       |                       |         |                       |                       |                       |         |         |          |         |                       |         |         |                       |                       |                       |                       |         |                       |                       |                       |         |         |          |                         |      |      |       |      |      |      |      |      |      |      |      |      |      |      |      |      |      |      |      |      |      |      |      |      |      |                       |      |       |        |      |       |       |       |       |       |       |       |       |       |       |      |       |       |       |       |       |       |       |       |       |       |       |      |       |      |      |      |      |      |       |      |       |      |      |      |      |      |      |      |      |      |      |       |      |      |       |      |          |    |  |    |   |    |    |    |  |    |  |      |                  |                 |    |                      |                  |                       |                   |    |                   |                   |                  |    |    |           |     |  |       |      |       |      |      |  |       |  |       |                  |      |       |      |      |      |      |      |      |      |     |      |  |     |    |  |       |  |  |  |  |  |  |  |  |  |  |  |  |  |  |  |  |  |  |  |  |  |  |  |
|-----------------------------------------------------------------------------------------------------------------------------------------------------------------------------------------------------------------------------------------------------------------------------------------------------------------------------------------------------------------------------------------------------------------------------------------------------------------------------------------------------------------------------------------------------------------------------------------------------------------------------------------------------------------------------------------------------------------------------------------------------------------------------------------------------------------------------------------------------------------------------------------------------------------------------------------------------------------------------------------------------------------------------------------------------------------------------------------------------------------------------------------------------------------------------------------------------------------------------------------------------------------------------------------------------------------------------------------------------------------------------------------------------------------------------------------------------------------------------------------------------------------------------------------------------------------------------------------------------------------------------------------------------------------------------------------------------------------------------------------------------------------------------------------------------------------------------------------------------------------------------------------------------------------------------------------------------------------------------------------------------------------------------------------------------------------------------------------------------------------------------------------------------------------------------------------------------------------------------------------------------------------------------------------------------------------------------------------------------------------------------------------------------------------------------------------------------------------------------------------------------------------------------------------------------------------------------------------------------------------------------------------------------------------------------------------------------------------------------------------------------------------------------------------------------------------------------------------------------------------------------------------------------------------------------------------------------------------------------------------------------------------------------------|--------|---------|--------|------------------|----------------|------------------------|---------------------------------|----------------------------|-----------------------------|--------------------|---------|-----------------------|-------------------|--------------------------------------------------------------------------------|-----------------------|-----------------------|-----------------------|-----------------------|---------|-----------------------|-----------------------|-----------------------|---------|---------|----------|---------|-----------------------|---------|---------|-----------------------|-----------------------|-----------------------|-----------------------|---------|-----------------------|-----------------------|-----------------------|---------|---------|----------|-------------------------|------|------|-------|------|------|------|------|------|------|------|------|------|------|------|------|------|------|------|------|------|------|------|------|------|------|-----------------------|------|-------|--------|------|-------|-------|-------|-------|-------|-------|-------|-------|-------|-------|------|-------|-------|-------|-------|-------|-------|-------|-------|-------|-------|-------|------|-------|------|------|------|------|------|-------|------|-------|------|------|------|------|------|------|------|------|------|------|-------|------|------|-------|------|----------|----|--|----|---|----|----|----|--|----|--|------|------------------|-----------------|----|----------------------|------------------|-----------------------|-------------------|----|-------------------|-------------------|------------------|----|----|-----------|-----|--|-------|------|-------|------|------|--|-------|--|-------|------------------|------|-------|------|------|------|------|------|------|------|-----|------|--|-----|----|--|-------|--|--|--|--|--|--|--|--|--|--|--|--|--|--|--|--|--|--|--|--|--|--|--|
| 1                                                                                                                                                                                                                                                                                                                                                                                                                                                                                                                                                                                                                                                                                                                                                                                                                                                                                                                                                                                                                                                                                                                                                                                                                                                                                                                                                                                                                                                                                                                                                                                                                                                                                                                                                                                                                                                                                                                                                                                                                                                                                                                                                                                                                                                                                                                                                                                                                                                                                                                                                                                                                                                                                                                                                                                                                                                                                                                                                                                                                                 | 20.93  | 87.4    | 9      | 5/25             | K197k          | (K)IFVGLSPDTPEEK(R)(E) | 1757.9432                       | 114.0552                   | 6.6                         | 38434.4/7.61       | HUMAN   | Q14103                | 293629            | Heterogeneous nuclear ribonucleoprotein D0 OS=Homo sapiens GN=HNRNPD PE=1 SV=1 |                       |                       |                       |                       |         |                       |                       |                       |         |         |          |         |                       |         |         |                       |                       |                       |                       |         |                       |                       |                       |         |         |          |                         |      |      |       |      |      |      |      |      |      |      |      |      |      |      |      |      |      |      |      |      |      |      |      |      |      |                       |      |       |        |      |       |       |       |       |       |       |       |       |       |       |      |       |       |       |       |       |       |       |       |       |       |       |      |       |      |      |      |      |      |       |      |       |      |      |      |      |      |      |      |      |      |      |       |      |      |       |      |          |    |  |    |   |    |    |    |  |    |  |      |                  |                 |    |                      |                  |                       |                   |    |                   |                   |                  |    |    |           |     |  |       |      |       |      |      |  |       |  |       |                  |      |       |      |      |      |      |      |      |      |     |      |  |     |    |  |       |  |  |  |  |  |  |  |  |  |  |  |  |  |  |  |  |  |  |  |  |  |  |  |
| <table border="1"> <thead> <tr> <th>Fragment-ion (m/z)</th> <th>70.065</th> <th>72.078</th> <th>86.095</th> <th>120.080</th> <th>175.113</th> <th>213.087</th> <th>233.166</th> <th>234.163</th> <th>261.158</th> <th>291.199</th> <th>315.156</th> <th>443.240<sup>+2</sup></th> <th>493.751</th> <th>530.346</th> <th>590.816<sup>+2</sup></th> <th>599.806<sup>+2</sup></th> <th>634.313<sup>+2</sup></th> <th>643.317<sup>+2</sup></th> <th>659.380</th> <th>756.897<sup>+2</sup></th> <th>757.871<sup>+2</sup></th> <th>806.423<sup>+2</sup></th> <th>885.477</th> <th>914.007</th> <th>1198.617</th> </tr> </thead> <tbody> <tr> <td>Frac. Inten. (% of TIC)</td> <td>0.00</td> <td>3.14</td> <td>16.33</td> <td>0.27</td> <td>2.31</td> <td>2.74</td> <td>7.58</td> <td>2.32</td> <td>8.33</td> <td>3.40</td> <td>3.36</td> <td>5.28</td> <td>1.87</td> <td>1.69</td> <td>1.58</td> <td>7.88</td> <td>2.20</td> <td>3.34</td> <td>1.73</td> <td>3.74</td> <td>1.87</td> <td>5.21</td> <td>5.36</td> <td>1.89</td> <td>6.58</td> </tr> <tr> <td>Rel. Inten. (% of BP)</td> <td>0.01</td> <td>19.21</td> <td>100.00</td> <td>1.68</td> <td>14.16</td> <td>16.80</td> <td>46.38</td> <td>14.19</td> <td>50.99</td> <td>20.84</td> <td>20.55</td> <td>32.34</td> <td>11.46</td> <td>10.34</td> <td>9.67</td> <td>48.25</td> <td>13.47</td> <td>20.46</td> <td>10.62</td> <td>22.93</td> <td>11.42</td> <td>31.89</td> <td>32.81</td> <td>11.57</td> <td>40.29</td> </tr> <tr> <td>Score</td> <td>0.20</td> <td>-0.19</td> <td>0.50</td> <td>1.00</td> <td>1.50</td> <td>0.75</td> <td>0.50</td> <td>-0.14</td> <td>0.50</td> <td>-0.21</td> <td>0.75</td> <td>1.50</td> <td>1.50</td> <td>1.50</td> <td>0.50</td> <td>1.50</td> <td>0.50</td> <td>1.50</td> <td>1.50</td> <td>1.50</td> <td>-0.11</td> <td>1.50</td> <td>1.50</td> <td>-0.12</td> <td>1.50</td> </tr> <tr> <td>Ion-type</td> <td>PR</td> <td></td> <td>B1</td> <td>F</td> <td>Y1</td> <td>PD</td> <td>B2</td> <td></td> <td>b2</td> <td></td> <td>GGLS</td> <td>Y6<sup>+2</sup></td> <td>Y<sup>+7</sup></td> <td>Y3</td> <td>Y9-H2O<sup>+2</sup></td> <td>Y9<sup>+2</sup></td> <td>Y10-H2O<sup>+2</sup></td> <td>Y10<sup>+2</sup></td> <td>Y4</td> <td>Y13<sup>+2</sup></td> <td>Y14<sup>+2</sup></td> <td>Y6<sup>+2</sup></td> <td>Y6</td> <td>Y9</td> </tr> <tr> <td>Delta ppm</td> <td>2.5</td> <td></td> <td>-30.5</td> <td>-7.3</td> <td>-31.7</td> <td>-6.5</td> <td>-0.6</td> <td></td> <td>-10.5</td> <td></td> <td>-36.2</td> <td>Y6<sup>+2</sup></td> <td>-7.4</td> <td>-32.6</td> <td>10.2</td> <td>24.9</td> <td>-0.6</td> <td>-7.1</td> <td>-9.0</td> <td>-5.9</td> <td>14.7</td> <td>2.8</td> <td>-2.3</td> <td></td> <td>9.1</td> </tr> <tr> <td>LI</td> <td></td> <td>-17.7</td> <td></td> </tr> </tbody> </table> |        |         |        |                  |                |                        |                                 |                            |                             |                    |         |                       |                   |                                                                                | Fragment-ion (m/z)    | 70.065                | 72.078                | 86.095                | 120.080 | 175.113               | 213.087               | 233.166               | 234.163 | 261.158 | 291.199  | 315.156 | 443.240 <sup>+2</sup> | 493.751 | 530.346 | 590.816 <sup>+2</sup> | 599.806 <sup>+2</sup> | 634.313 <sup>+2</sup> | 643.317 <sup>+2</sup> | 659.380 | 756.897 <sup>+2</sup> | 757.871 <sup>+2</sup> | 806.423 <sup>+2</sup> | 885.477 | 914.007 | 1198.617 | Frac. Inten. (% of TIC) | 0.00 | 3.14 | 16.33 | 0.27 | 2.31 | 2.74 | 7.58 | 2.32 | 8.33 | 3.40 | 3.36 | 5.28 | 1.87 | 1.69 | 1.58 | 7.88 | 2.20 | 3.34 | 1.73 | 3.74 | 1.87 | 5.21 | 5.36 | 1.89 | 6.58 | Rel. Inten. (% of BP) | 0.01 | 19.21 | 100.00 | 1.68 | 14.16 | 16.80 | 46.38 | 14.19 | 50.99 | 20.84 | 20.55 | 32.34 | 11.46 | 10.34 | 9.67 | 48.25 | 13.47 | 20.46 | 10.62 | 22.93 | 11.42 | 31.89 | 32.81 | 11.57 | 40.29 | Score | 0.20 | -0.19 | 0.50 | 1.00 | 1.50 | 0.75 | 0.50 | -0.14 | 0.50 | -0.21 | 0.75 | 1.50 | 1.50 | 1.50 | 0.50 | 1.50 | 0.50 | 1.50 | 1.50 | 1.50 | -0.11 | 1.50 | 1.50 | -0.12 | 1.50 | Ion-type | PR |  | B1 | F | Y1 | PD | B2 |  | b2 |  | GGLS | Y6 <sup>+2</sup> | Y <sup>+7</sup> | Y3 | Y9-H2O <sup>+2</sup> | Y9 <sup>+2</sup> | Y10-H2O <sup>+2</sup> | Y10 <sup>+2</sup> | Y4 | Y13 <sup>+2</sup> | Y14 <sup>+2</sup> | Y6 <sup>+2</sup> | Y6 | Y9 | Delta ppm | 2.5 |  | -30.5 | -7.3 | -31.7 | -6.5 | -0.6 |  | -10.5 |  | -36.2 | Y6 <sup>+2</sup> | -7.4 | -32.6 | 10.2 | 24.9 | -0.6 | -7.1 | -9.0 | -5.9 | 14.7 | 2.8 | -2.3 |  | 9.1 | LI |  | -17.7 |  |  |  |  |  |  |  |  |  |  |  |  |  |  |  |  |  |  |  |  |  |  |  |
| Fragment-ion (m/z)                                                                                                                                                                                                                                                                                                                                                                                                                                                                                                                                                                                                                                                                                                                                                                                                                                                                                                                                                                                                                                                                                                                                                                                                                                                                                                                                                                                                                                                                                                                                                                                                                                                                                                                                                                                                                                                                                                                                                                                                                                                                                                                                                                                                                                                                                                                                                                                                                                                                                                                                                                                                                                                                                                                                                                                                                                                                                                                                                                                                                | 70.065 | 72.078  | 86.095 | 120.080          | 175.113        | 213.087                | 233.166                         | 234.163                    | 261.158                     | 291.199            | 315.156 | 443.240 <sup>+2</sup> | 493.751           | 530.346                                                                        | 590.816 <sup>+2</sup> | 599.806 <sup>+2</sup> | 634.313 <sup>+2</sup> | 643.317 <sup>+2</sup> | 659.380 | 756.897 <sup>+2</sup> | 757.871 <sup>+2</sup> | 806.423 <sup>+2</sup> | 885.477 | 914.007 | 1198.617 |         |                       |         |         |                       |                       |                       |                       |         |                       |                       |                       |         |         |          |                         |      |      |       |      |      |      |      |      |      |      |      |      |      |      |      |      |      |      |      |      |      |      |      |      |      |                       |      |       |        |      |       |       |       |       |       |       |       |       |       |       |      |       |       |       |       |       |       |       |       |       |       |       |      |       |      |      |      |      |      |       |      |       |      |      |      |      |      |      |      |      |      |      |       |      |      |       |      |          |    |  |    |   |    |    |    |  |    |  |      |                  |                 |    |                      |                  |                       |                   |    |                   |                   |                  |    |    |           |     |  |       |      |       |      |      |  |       |  |       |                  |      |       |      |      |      |      |      |      |      |     |      |  |     |    |  |       |  |  |  |  |  |  |  |  |  |  |  |  |  |  |  |  |  |  |  |  |  |  |  |
| Frac. Inten. (% of TIC)                                                                                                                                                                                                                                                                                                                                                                                                                                                                                                                                                                                                                                                                                                                                                                                                                                                                                                                                                                                                                                                                                                                                                                                                                                                                                                                                                                                                                                                                                                                                                                                                                                                                                                                                                                                                                                                                                                                                                                                                                                                                                                                                                                                                                                                                                                                                                                                                                                                                                                                                                                                                                                                                                                                                                                                                                                                                                                                                                                                                           | 0.00   | 3.14    | 16.33  | 0.27             | 2.31           | 2.74                   | 7.58                            | 2.32                       | 8.33                        | 3.40               | 3.36    | 5.28                  | 1.87              | 1.69                                                                           | 1.58                  | 7.88                  | 2.20                  | 3.34                  | 1.73    | 3.74                  | 1.87                  | 5.21                  | 5.36    | 1.89    | 6.58     |         |                       |         |         |                       |                       |                       |                       |         |                       |                       |                       |         |         |          |                         |      |      |       |      |      |      |      |      |      |      |      |      |      |      |      |      |      |      |      |      |      |      |      |      |      |                       |      |       |        |      |       |       |       |       |       |       |       |       |       |       |      |       |       |       |       |       |       |       |       |       |       |       |      |       |      |      |      |      |      |       |      |       |      |      |      |      |      |      |      |      |      |      |       |      |      |       |      |          |    |  |    |   |    |    |    |  |    |  |      |                  |                 |    |                      |                  |                       |                   |    |                   |                   |                  |    |    |           |     |  |       |      |       |      |      |  |       |  |       |                  |      |       |      |      |      |      |      |      |      |     |      |  |     |    |  |       |  |  |  |  |  |  |  |  |  |  |  |  |  |  |  |  |  |  |  |  |  |  |  |
| Rel. Inten. (% of BP)                                                                                                                                                                                                                                                                                                                                                                                                                                                                                                                                                                                                                                                                                                                                                                                                                                                                                                                                                                                                                                                                                                                                                                                                                                                                                                                                                                                                                                                                                                                                                                                                                                                                                                                                                                                                                                                                                                                                                                                                                                                                                                                                                                                                                                                                                                                                                                                                                                                                                                                                                                                                                                                                                                                                                                                                                                                                                                                                                                                                             | 0.01   | 19.21   | 100.00 | 1.68             | 14.16          | 16.80                  | 46.38                           | 14.19                      | 50.99                       | 20.84              | 20.55   | 32.34                 | 11.46             | 10.34                                                                          | 9.67                  | 48.25                 | 13.47                 | 20.46                 | 10.62   | 22.93                 | 11.42                 | 31.89                 | 32.81   | 11.57   | 40.29    |         |                       |         |         |                       |                       |                       |                       |         |                       |                       |                       |         |         |          |                         |      |      |       |      |      |      |      |      |      |      |      |      |      |      |      |      |      |      |      |      |      |      |      |      |      |                       |      |       |        |      |       |       |       |       |       |       |       |       |       |       |      |       |       |       |       |       |       |       |       |       |       |       |      |       |      |      |      |      |      |       |      |       |      |      |      |      |      |      |      |      |      |      |       |      |      |       |      |          |    |  |    |   |    |    |    |  |    |  |      |                  |                 |    |                      |                  |                       |                   |    |                   |                   |                  |    |    |           |     |  |       |      |       |      |      |  |       |  |       |                  |      |       |      |      |      |      |      |      |      |     |      |  |     |    |  |       |  |  |  |  |  |  |  |  |  |  |  |  |  |  |  |  |  |  |  |  |  |  |  |
| Score                                                                                                                                                                                                                                                                                                                                                                                                                                                                                                                                                                                                                                                                                                                                                                                                                                                                                                                                                                                                                                                                                                                                                                                                                                                                                                                                                                                                                                                                                                                                                                                                                                                                                                                                                                                                                                                                                                                                                                                                                                                                                                                                                                                                                                                                                                                                                                                                                                                                                                                                                                                                                                                                                                                                                                                                                                                                                                                                                                                                                             | 0.20   | -0.19   | 0.50   | 1.00             | 1.50           | 0.75                   | 0.50                            | -0.14                      | 0.50                        | -0.21              | 0.75    | 1.50                  | 1.50              | 1.50                                                                           | 0.50                  | 1.50                  | 0.50                  | 1.50                  | 1.50    | 1.50                  | -0.11                 | 1.50                  | 1.50    | -0.12   | 1.50     |         |                       |         |         |                       |                       |                       |                       |         |                       |                       |                       |         |         |          |                         |      |      |       |      |      |      |      |      |      |      |      |      |      |      |      |      |      |      |      |      |      |      |      |      |      |                       |      |       |        |      |       |       |       |       |       |       |       |       |       |       |      |       |       |       |       |       |       |       |       |       |       |       |      |       |      |      |      |      |      |       |      |       |      |      |      |      |      |      |      |      |      |      |       |      |      |       |      |          |    |  |    |   |    |    |    |  |    |  |      |                  |                 |    |                      |                  |                       |                   |    |                   |                   |                  |    |    |           |     |  |       |      |       |      |      |  |       |  |       |                  |      |       |      |      |      |      |      |      |      |     |      |  |     |    |  |       |  |  |  |  |  |  |  |  |  |  |  |  |  |  |  |  |  |  |  |  |  |  |  |
| Ion-type                                                                                                                                                                                                                                                                                                                                                                                                                                                                                                                                                                                                                                                                                                                                                                                                                                                                                                                                                                                                                                                                                                                                                                                                                                                                                                                                                                                                                                                                                                                                                                                                                                                                                                                                                                                                                                                                                                                                                                                                                                                                                                                                                                                                                                                                                                                                                                                                                                                                                                                                                                                                                                                                                                                                                                                                                                                                                                                                                                                                                          | PR     |         | B1     | F                | Y1             | PD                     | B2                              |                            | b2                          |                    | GGLS    | Y6 <sup>+2</sup>      | Y <sup>+7</sup>   | Y3                                                                             | Y9-H2O <sup>+2</sup>  | Y9 <sup>+2</sup>      | Y10-H2O <sup>+2</sup> | Y10 <sup>+2</sup>     | Y4      | Y13 <sup>+2</sup>     | Y14 <sup>+2</sup>     | Y6 <sup>+2</sup>      | Y6      | Y9      |          |         |                       |         |         |                       |                       |                       |                       |         |                       |                       |                       |         |         |          |                         |      |      |       |      |      |      |      |      |      |      |      |      |      |      |      |      |      |      |      |      |      |      |      |      |      |                       |      |       |        |      |       |       |       |       |       |       |       |       |       |       |      |       |       |       |       |       |       |       |       |       |       |       |      |       |      |      |      |      |      |       |      |       |      |      |      |      |      |      |      |      |      |      |       |      |      |       |      |          |    |  |    |   |    |    |    |  |    |  |      |                  |                 |    |                      |                  |                       |                   |    |                   |                   |                  |    |    |           |     |  |       |      |       |      |      |  |       |  |       |                  |      |       |      |      |      |      |      |      |      |     |      |  |     |    |  |       |  |  |  |  |  |  |  |  |  |  |  |  |  |  |  |  |  |  |  |  |  |  |  |
| Delta ppm                                                                                                                                                                                                                                                                                                                                                                                                                                                                                                                                                                                                                                                                                                                                                                                                                                                                                                                                                                                                                                                                                                                                                                                                                                                                                                                                                                                                                                                                                                                                                                                                                                                                                                                                                                                                                                                                                                                                                                                                                                                                                                                                                                                                                                                                                                                                                                                                                                                                                                                                                                                                                                                                                                                                                                                                                                                                                                                                                                                                                         | 2.5    |         | -30.5  | -7.3             | -31.7          | -6.5                   | -0.6                            |                            | -10.5                       |                    | -36.2   | Y6 <sup>+2</sup>      | -7.4              | -32.6                                                                          | 10.2                  | 24.9                  | -0.6                  | -7.1                  | -9.0    | -5.9                  | 14.7                  | 2.8                   | -2.3    |         | 9.1      |         |                       |         |         |                       |                       |                       |                       |         |                       |                       |                       |         |         |          |                         |      |      |       |      |      |      |      |      |      |      |      |      |      |      |      |      |      |      |      |      |      |      |      |      |      |                       |      |       |        |      |       |       |       |       |       |       |       |       |       |       |      |       |       |       |       |       |       |       |       |       |       |       |      |       |      |      |      |      |      |       |      |       |      |      |      |      |      |      |      |      |      |      |       |      |      |       |      |          |    |  |    |   |    |    |    |  |    |  |      |                  |                 |    |                      |                  |                       |                   |    |                   |                   |                  |    |    |           |     |  |       |      |       |      |      |  |       |  |       |                  |      |       |      |      |      |      |      |      |      |     |      |  |     |    |  |       |  |  |  |  |  |  |  |  |  |  |  |  |  |  |  |  |  |  |  |  |  |  |  |
| LI                                                                                                                                                                                                                                                                                                                                                                                                                                                                                                                                                                                                                                                                                                                                                                                                                                                                                                                                                                                                                                                                                                                                                                                                                                                                                                                                                                                                                                                                                                                                                                                                                                                                                                                                                                                                                                                                                                                                                                                                                                                                                                                                                                                                                                                                                                                                                                                                                                                                                                                                                                                                                                                                                                                                                                                                                                                                                                                                                                                                                                |        | -17.7   |        |                  |                |                        |                                 |                            |                             |                    |         |                       |                   |                                                                                |                       |                       |                       |                       |         |                       |                       |                       |         |         |          |         |                       |         |         |                       |                       |                       |                       |         |                       |                       |                       |         |         |          |                         |      |      |       |      |      |      |      |      |      |      |      |      |      |      |      |      |      |      |      |      |      |      |      |      |      |                       |      |       |        |      |       |       |       |       |       |       |       |       |       |       |      |       |       |       |       |       |       |       |       |       |       |       |      |       |      |      |      |      |      |       |      |       |      |      |      |      |      |      |      |      |      |      |       |      |      |       |      |          |    |  |    |   |    |    |    |  |    |  |      |                  |                 |    |                      |                  |                       |                   |    |                   |                   |                  |    |    |           |     |  |       |      |       |      |      |  |       |  |       |                  |      |       |      |      |      |      |      |      |      |     |      |  |     |    |  |       |  |  |  |  |  |  |  |  |  |  |  |  |  |  |  |  |  |  |  |  |  |  |  |

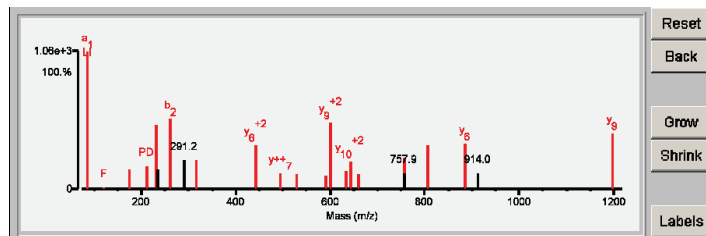

Result Summary

| Rank | Score | SPI (%) | BCS | # Unmatched ions | Variable sites | Sequence                     | MH <sup>+</sup> Calculated (Da) | MH <sup>+</sup> Error (Da) | MH <sup>+</sup> Error (ppm) | Protein MW/Pl (Da) | Species | Accession # | Protein Name                                                                                       |
|------|-------|---------|-----|------------------|----------------|------------------------------|---------------------------------|----------------------------|-----------------------------|--------------------|---------|-------------|----------------------------------------------------------------------------------------------------|
| 1    | 28.72 | 95.9    | 15  | 2/25             | K22k           | (K)LFIGGLNLTETNEKALEAVFGK(Y) | 2251.1969                       | 114.0682                   | 10.7                        | 42332.0/10.06      | HUMAN   | P38159      | Heterogeneous nuclear ribonucleoprotein G OS=Homo sapiens GN=RBMX PE=1 SV=3                        |
| 2    | 22.30 | 89.6    | 11  | 6/25             | None           | (K)LFIGGLNRETNEKMLKAVFGK(H)  | 2365.3060                       | -0.0410                    | -17.3                       | 55783.8/9.95       | HUMAN   | Q15414      | RNA-binding motif protein, Y chromosome, family 1 member A1/C OS=Homo sapiens GN=RBMX1A1 PE=1 SV=1 |
| 2    | 22.30 | 89.6    | 11  | 6/25             | None           | (K)LFIGGLNRETNEKMLKAVFGK(H)  | 2365.3060                       | -0.0410                    | -17.3                       | 55834.9/9.96       | HUMAN   | A6NDE4      | RNA-binding motif protein, Y chromosome, family 1 member B OS=Homo sapiens GN=RBMX1B PE=2 SV=2     |
| 2    | 22.30 | 89.6    | 11  | 6/25             | None           | (K)LFIGGLNRETNEKMLKAVFGK(H)  | 2365.3060                       | -0.0410                    | -17.3                       | 55774.8/9.95       | HUMAN   | P0C7P1      | RNA-binding motif protein, Y chromosome, family 1 member D OS=Homo sapiens GN=RBMX1D PE=2 SV=1     |
| 2    | 22.30 | 89.6    | 11  | 6/25             | None           | (K)LFIGGLNRETNEKMLKAVFGK(H)  | 2365.3060                       | -0.0410                    | -17.3                       | 55758.8/9.95       | HUMAN   | A6NEQ0      | RNA-binding motif protein, Y chromosome, family 1 member E OS=Homo sapiens GN=RBMX1E PE=2 SV=1     |

Detailed Results

| Rank                                                                                                                                                                                                                                                                                                                                                                                                                                                                                                                                                                                                                                                                                                                                                                                                                                                                                                                                                                                                                                                                                                                                                                                                                                                                                                                                                                                                                                                                                                                                                                                                                                                                                                                                                                                                                                                                                                                                                                                                                                                                                                                                                                                                                                                                                                                                                                                                                                                                                                                                                                                                                                                                                                                                                                                                                                                                                                                                                                                                                                                                                                                                                                                                                                                                                                                                                                                                                                                                                                                                                                                                                                                                                                                                                                                                            | Score  | SPI (%) | BCS     | # Unmatched ions | Variable sites | Sequence                                                                            | MH <sup>+</sup> Calculated (Da) | MH <sup>+</sup> Error (Da) | MH <sup>+</sup> Error (ppm) | Protein MW/Pl (Da) | Species | Accession # | MS-Digest Index #     | Protein Name                                                                |                       |         |                       |                       |                       |                       |                       |                        |                        |                        |          |         |         |                       |         |                       |         |                       |                       |                       |                       |                       |                        |                        |                        |          |                         |      |       |      |      |       |      |       |      |      |      |      |      |      |      |      |      |      |      |      |      |       |      |       |      |      |                       |      |       |      |       |       |       |       |       |       |      |       |       |       |      |      |       |       |       |       |       |       |       |        |      |      |       |      |      |      |      |      |       |      |       |      |      |      |      |      |      |      |      |      |      |      |      |      |      |      |      |      |          |    |    |   |    |    |    |    |    |    |    |    |    |    |     |     |     |     |     |     |     |     |     |     |     |     |           |      |       |       |      |      |      |      |      |      |      |      |      |     |     |     |     |     |     |     |     |     |      |     |      |      |  |  |  |  |  |       |  |      |  |  |  |  |  |  |  |  |  |  |  |  |  |  |  |  |  |  |  |  |  |  |  |      |  |     |  |  |  |  |  |  |  |  |  |  |  |  |  |  |  |  |  |  |  |  |  |  |  |  |  |    |  |  |  |  |  |  |  |  |  |  |  |  |  |  |  |  |  |  |  |  |  |  |  |  |  |      |  |  |  |  |  |  |  |  |  |  |  |  |  |  |  |  |  |  |
|-----------------------------------------------------------------------------------------------------------------------------------------------------------------------------------------------------------------------------------------------------------------------------------------------------------------------------------------------------------------------------------------------------------------------------------------------------------------------------------------------------------------------------------------------------------------------------------------------------------------------------------------------------------------------------------------------------------------------------------------------------------------------------------------------------------------------------------------------------------------------------------------------------------------------------------------------------------------------------------------------------------------------------------------------------------------------------------------------------------------------------------------------------------------------------------------------------------------------------------------------------------------------------------------------------------------------------------------------------------------------------------------------------------------------------------------------------------------------------------------------------------------------------------------------------------------------------------------------------------------------------------------------------------------------------------------------------------------------------------------------------------------------------------------------------------------------------------------------------------------------------------------------------------------------------------------------------------------------------------------------------------------------------------------------------------------------------------------------------------------------------------------------------------------------------------------------------------------------------------------------------------------------------------------------------------------------------------------------------------------------------------------------------------------------------------------------------------------------------------------------------------------------------------------------------------------------------------------------------------------------------------------------------------------------------------------------------------------------------------------------------------------------------------------------------------------------------------------------------------------------------------------------------------------------------------------------------------------------------------------------------------------------------------------------------------------------------------------------------------------------------------------------------------------------------------------------------------------------------------------------------------------------------------------------------------------------------------------------------------------------------------------------------------------------------------------------------------------------------------------------------------------------------------------------------------------------------------------------------------------------------------------------------------------------------------------------------------------------------------------------------------------------------------------------------------------|--------|---------|---------|------------------|----------------|-------------------------------------------------------------------------------------|---------------------------------|----------------------------|-----------------------------|--------------------|---------|-------------|-----------------------|-----------------------------------------------------------------------------|-----------------------|---------|-----------------------|-----------------------|-----------------------|-----------------------|-----------------------|------------------------|------------------------|------------------------|----------|---------|---------|-----------------------|---------|-----------------------|---------|-----------------------|-----------------------|-----------------------|-----------------------|-----------------------|------------------------|------------------------|------------------------|----------|-------------------------|------|-------|------|------|-------|------|-------|------|------|------|------|------|------|------|------|------|------|------|------|------|-------|------|-------|------|------|-----------------------|------|-------|------|-------|-------|-------|-------|-------|-------|------|-------|-------|-------|------|------|-------|-------|-------|-------|-------|-------|-------|--------|------|------|-------|------|------|------|------|------|-------|------|-------|------|------|------|------|------|------|------|------|------|------|------|------|------|------|------|------|------|----------|----|----|---|----|----|----|----|----|----|----|----|----|----|-----|-----|-----|-----|-----|-----|-----|-----|-----|-----|-----|-----|-----------|------|-------|-------|------|------|------|------|------|------|------|------|------|-----|-----|-----|-----|-----|-----|-----|-----|-----|------|-----|------|------|--|--|--|--|--|-------|--|------|--|--|--|--|--|--|--|--|--|--|--|--|--|--|--|--|--|--|--|--|--|--|--|------|--|-----|--|--|--|--|--|--|--|--|--|--|--|--|--|--|--|--|--|--|--|--|--|--|--|--|--|----|--|--|--|--|--|--|--|--|--|--|--|--|--|--|--|--|--|--|--|--|--|--|--|--|--|------|--|--|--|--|--|--|--|--|--|--|--|--|--|--|--|--|--|--|
| 1                                                                                                                                                                                                                                                                                                                                                                                                                                                                                                                                                                                                                                                                                                                                                                                                                                                                                                                                                                                                                                                                                                                                                                                                                                                                                                                                                                                                                                                                                                                                                                                                                                                                                                                                                                                                                                                                                                                                                                                                                                                                                                                                                                                                                                                                                                                                                                                                                                                                                                                                                                                                                                                                                                                                                                                                                                                                                                                                                                                                                                                                                                                                                                                                                                                                                                                                                                                                                                                                                                                                                                                                                                                                                                                                                                                                               | 28.72  | 95.9    | 15      | 2/25             | K22k           | (K) L / F / I / G / G / L / N / T / E / T N E K / A / L / E / A / V / E / G K ( Y ) | 2251.1969                       | 114.0682                   | 10.7                        | 42332.0/10.06      | HUMAN   | P38159      | 293647                | Heterogeneous nuclear ribonucleoprotein G OS=Homo sapiens GN=RBMX PE=1 SV=3 |                       |         |                       |                       |                       |                       |                       |                        |                        |                        |          |         |         |                       |         |                       |         |                       |                       |                       |                       |                       |                        |                        |                        |          |                         |      |       |      |      |       |      |       |      |      |      |      |      |      |      |      |      |      |      |      |      |       |      |       |      |      |                       |      |       |      |       |       |       |       |       |       |      |       |       |       |      |      |       |       |       |       |       |       |       |        |      |      |       |      |      |      |      |      |       |      |       |      |      |      |      |      |      |      |      |      |      |      |      |      |      |      |      |      |          |    |    |   |    |    |    |    |    |    |    |    |    |    |     |     |     |     |     |     |     |     |     |     |     |     |           |      |       |       |      |      |      |      |      |      |      |      |      |     |     |     |     |     |     |     |     |     |      |     |      |      |  |  |  |  |  |       |  |      |  |  |  |  |  |  |  |  |  |  |  |  |  |  |  |  |  |  |  |  |  |  |  |      |  |     |  |  |  |  |  |  |  |  |  |  |  |  |  |  |  |  |  |  |  |  |  |  |  |  |  |    |  |  |  |  |  |  |  |  |  |  |  |  |  |  |  |  |  |  |  |  |  |  |  |  |  |      |  |  |  |  |  |  |  |  |  |  |  |  |  |  |  |  |  |  |
| <table border="1"> <thead> <tr> <th>Fragment-ion (m/z)</th> <th>84.081</th> <th>86.096</th> <th>120.079</th> <th>204.134</th> <th>233.165</th> <th>234.167</th> <th>261.160</th> <th>262.164</th> <th>351.206</th> <th>450.272</th> <th>521.307</th> <th>650.347</th> <th>702.371<sup>+3</sup></th> <th>763.437</th> <th>825.926<sup>+2</sup></th> <th>834.472</th> <th>882.943<sup>+2</sup></th> <th>939.484<sup>+2</sup></th> <th>967.996<sup>+2</sup></th> <th>987.509<sup>+2</sup></th> <th>996.507<sup>+2</sup></th> <th>1044.041<sup>+2</sup></th> <th>1053.056<sup>+2</sup></th> <th>1126.610<sup>+2</sup></th> <th>1420.731</th> </tr> </thead> <tbody> <tr> <td>Frac. Inten. (% of TIC)</td> <td>0.06</td> <td>10.94</td> <td>0.21</td> <td>1.90</td> <td>12.68</td> <td>2.21</td> <td>10.68</td> <td>1.92</td> <td>4.16</td> <td>1.25</td> <td>1.71</td> <td>1.70</td> <td>4.05</td> <td>1.32</td> <td>1.26</td> <td>2.25</td> <td>2.46</td> <td>1.55</td> <td>3.43</td> <td>2.21</td> <td>13.39</td> <td>1.73</td> <td>14.81</td> <td>1.10</td> <td>1.02</td> </tr> <tr> <td>Rel. Inten. (% of BP)</td> <td>0.40</td> <td>73.89</td> <td>1.39</td> <td>12.81</td> <td>85.63</td> <td>14.90</td> <td>72.08</td> <td>12.96</td> <td>28.11</td> <td>8.46</td> <td>11.55</td> <td>11.50</td> <td>27.35</td> <td>8.92</td> <td>8.50</td> <td>15.21</td> <td>16.63</td> <td>10.46</td> <td>23.17</td> <td>14.92</td> <td>90.39</td> <td>11.65</td> <td>100.00</td> <td>7.42</td> <td>6.86</td> </tr> <tr> <td>Score</td> <td>0.50</td> <td>0.50</td> <td>1.00</td> <td>1.50</td> <td>0.50</td> <td>-0.15</td> <td>1.50</td> <td>-0.13</td> <td>1.50</td> </tr> <tr> <td>Ion-type</td> <td>KQ</td> <td>a1</td> <td>F</td> <td>y2</td> <td>a2</td> <td>b2</td> <td>y3</td> <td>y4</td> <td>y5</td> <td>y6</td> <td>y7</td> <td>y8</td> <td>y9</td> <td>y10</td> <td>y11</td> <td>y12</td> <td>y13</td> <td>y14</td> <td>y15</td> <td>y16</td> <td>y17</td> <td>y18</td> <td>y19</td> <td>y20</td> <td>y21</td> </tr> <tr> <td>Delta ppm</td> <td>-2.1</td> <td>-23.5</td> <td>-12.3</td> <td>-0.8</td> <td>-4.4</td> <td>-3.6</td> <td>-6.6</td> <td>-3.6</td> <td>-8.3</td> <td>-1.8</td> <td>-1.6</td> <td>-5.7</td> <td>5.9</td> <td>3.3</td> <td>6.8</td> <td>0.3</td> <td>1.5</td> <td>0.3</td> <td>1.8</td> <td>9.3</td> <td>1.8</td> <td>-1.3</td> <td>8.6</td> <td>25.2</td> <td>-6.4</td> </tr> <tr> <td></td> <td></td> <td></td> <td></td> <td></td> <td>Fl-28</td> <td></td> <td>y++5</td> <td></td> </tr> <tr> <td></td> <td></td> <td></td> <td></td> <td></td> <td>-4.4</td> <td></td> <td>8.3</td> <td></td> </tr> <tr> <td></td> <td></td> <td></td> <td></td> <td></td> <td></td> <td></td> <td>Fl</td> <td></td> </tr> <tr> <td></td> <td></td> <td></td> <td></td> <td></td> <td></td> <td></td> <td>-3.6</td> <td></td> </tr> </tbody> </table> |        |         |         |                  |                |                                                                                     |                                 |                            |                             |                    |         |             |                       |                                                                             | Fragment-ion (m/z)    | 84.081  | 86.096                | 120.079               | 204.134               | 233.165               | 234.167               | 261.160                | 262.164                | 351.206                | 450.272  | 521.307 | 650.347 | 702.371 <sup>+3</sup> | 763.437 | 825.926 <sup>+2</sup> | 834.472 | 882.943 <sup>+2</sup> | 939.484 <sup>+2</sup> | 967.996 <sup>+2</sup> | 987.509 <sup>+2</sup> | 996.507 <sup>+2</sup> | 1044.041 <sup>+2</sup> | 1053.056 <sup>+2</sup> | 1126.610 <sup>+2</sup> | 1420.731 | Frac. Inten. (% of TIC) | 0.06 | 10.94 | 0.21 | 1.90 | 12.68 | 2.21 | 10.68 | 1.92 | 4.16 | 1.25 | 1.71 | 1.70 | 4.05 | 1.32 | 1.26 | 2.25 | 2.46 | 1.55 | 3.43 | 2.21 | 13.39 | 1.73 | 14.81 | 1.10 | 1.02 | Rel. Inten. (% of BP) | 0.40 | 73.89 | 1.39 | 12.81 | 85.63 | 14.90 | 72.08 | 12.96 | 28.11 | 8.46 | 11.55 | 11.50 | 27.35 | 8.92 | 8.50 | 15.21 | 16.63 | 10.46 | 23.17 | 14.92 | 90.39 | 11.65 | 100.00 | 7.42 | 6.86 | Score | 0.50 | 0.50 | 1.00 | 1.50 | 0.50 | -0.15 | 1.50 | -0.13 | 1.50 | 1.50 | 1.50 | 1.50 | 1.50 | 1.50 | 1.50 | 1.50 | 1.50 | 1.50 | 1.50 | 1.50 | 1.50 | 1.50 | 1.50 | 1.50 | 1.50 | Ion-type | KQ | a1 | F | y2 | a2 | b2 | y3 | y4 | y5 | y6 | y7 | y8 | y9 | y10 | y11 | y12 | y13 | y14 | y15 | y16 | y17 | y18 | y19 | y20 | y21 | Delta ppm | -2.1 | -23.5 | -12.3 | -0.8 | -4.4 | -3.6 | -6.6 | -3.6 | -8.3 | -1.8 | -1.6 | -5.7 | 5.9 | 3.3 | 6.8 | 0.3 | 1.5 | 0.3 | 1.8 | 9.3 | 1.8 | -1.3 | 8.6 | 25.2 | -6.4 |  |  |  |  |  | Fl-28 |  | y++5 |  |  |  |  |  |  |  |  |  |  |  |  |  |  |  |  |  |  |  |  |  |  |  | -4.4 |  | 8.3 |  |  |  |  |  |  |  |  |  |  |  |  |  |  |  |  |  |  |  |  |  |  |  |  |  | Fl |  |  |  |  |  |  |  |  |  |  |  |  |  |  |  |  |  |  |  |  |  |  |  |  |  | -3.6 |  |  |  |  |  |  |  |  |  |  |  |  |  |  |  |  |  |  |
| Fragment-ion (m/z)                                                                                                                                                                                                                                                                                                                                                                                                                                                                                                                                                                                                                                                                                                                                                                                                                                                                                                                                                                                                                                                                                                                                                                                                                                                                                                                                                                                                                                                                                                                                                                                                                                                                                                                                                                                                                                                                                                                                                                                                                                                                                                                                                                                                                                                                                                                                                                                                                                                                                                                                                                                                                                                                                                                                                                                                                                                                                                                                                                                                                                                                                                                                                                                                                                                                                                                                                                                                                                                                                                                                                                                                                                                                                                                                                                                              | 84.081 | 86.096  | 120.079 | 204.134          | 233.165        | 234.167                                                                             | 261.160                         | 262.164                    | 351.206                     | 450.272            | 521.307 | 650.347     | 702.371 <sup>+3</sup> | 763.437                                                                     | 825.926 <sup>+2</sup> | 834.472 | 882.943 <sup>+2</sup> | 939.484 <sup>+2</sup> | 967.996 <sup>+2</sup> | 987.509 <sup>+2</sup> | 996.507 <sup>+2</sup> | 1044.041 <sup>+2</sup> | 1053.056 <sup>+2</sup> | 1126.610 <sup>+2</sup> | 1420.731 |         |         |                       |         |                       |         |                       |                       |                       |                       |                       |                        |                        |                        |          |                         |      |       |      |      |       |      |       |      |      |      |      |      |      |      |      |      |      |      |      |      |       |      |       |      |      |                       |      |       |      |       |       |       |       |       |       |      |       |       |       |      |      |       |       |       |       |       |       |       |        |      |      |       |      |      |      |      |      |       |      |       |      |      |      |      |      |      |      |      |      |      |      |      |      |      |      |      |      |          |    |    |   |    |    |    |    |    |    |    |    |    |    |     |     |     |     |     |     |     |     |     |     |     |     |           |      |       |       |      |      |      |      |      |      |      |      |      |     |     |     |     |     |     |     |     |     |      |     |      |      |  |  |  |  |  |       |  |      |  |  |  |  |  |  |  |  |  |  |  |  |  |  |  |  |  |  |  |  |  |  |  |      |  |     |  |  |  |  |  |  |  |  |  |  |  |  |  |  |  |  |  |  |  |  |  |  |  |  |  |    |  |  |  |  |  |  |  |  |  |  |  |  |  |  |  |  |  |  |  |  |  |  |  |  |  |      |  |  |  |  |  |  |  |  |  |  |  |  |  |  |  |  |  |  |
| Frac. Inten. (% of TIC)                                                                                                                                                                                                                                                                                                                                                                                                                                                                                                                                                                                                                                                                                                                                                                                                                                                                                                                                                                                                                                                                                                                                                                                                                                                                                                                                                                                                                                                                                                                                                                                                                                                                                                                                                                                                                                                                                                                                                                                                                                                                                                                                                                                                                                                                                                                                                                                                                                                                                                                                                                                                                                                                                                                                                                                                                                                                                                                                                                                                                                                                                                                                                                                                                                                                                                                                                                                                                                                                                                                                                                                                                                                                                                                                                                                         | 0.06   | 10.94   | 0.21    | 1.90             | 12.68          | 2.21                                                                                | 10.68                           | 1.92                       | 4.16                        | 1.25               | 1.71    | 1.70        | 4.05                  | 1.32                                                                        | 1.26                  | 2.25    | 2.46                  | 1.55                  | 3.43                  | 2.21                  | 13.39                 | 1.73                   | 14.81                  | 1.10                   | 1.02     |         |         |                       |         |                       |         |                       |                       |                       |                       |                       |                        |                        |                        |          |                         |      |       |      |      |       |      |       |      |      |      |      |      |      |      |      |      |      |      |      |      |       |      |       |      |      |                       |      |       |      |       |       |       |       |       |       |      |       |       |       |      |      |       |       |       |       |       |       |       |        |      |      |       |      |      |      |      |      |       |      |       |      |      |      |      |      |      |      |      |      |      |      |      |      |      |      |      |      |          |    |    |   |    |    |    |    |    |    |    |    |    |    |     |     |     |     |     |     |     |     |     |     |     |     |           |      |       |       |      |      |      |      |      |      |      |      |      |     |     |     |     |     |     |     |     |     |      |     |      |      |  |  |  |  |  |       |  |      |  |  |  |  |  |  |  |  |  |  |  |  |  |  |  |  |  |  |  |  |  |  |  |      |  |     |  |  |  |  |  |  |  |  |  |  |  |  |  |  |  |  |  |  |  |  |  |  |  |  |  |    |  |  |  |  |  |  |  |  |  |  |  |  |  |  |  |  |  |  |  |  |  |  |  |  |  |      |  |  |  |  |  |  |  |  |  |  |  |  |  |  |  |  |  |  |
| Rel. Inten. (% of BP)                                                                                                                                                                                                                                                                                                                                                                                                                                                                                                                                                                                                                                                                                                                                                                                                                                                                                                                                                                                                                                                                                                                                                                                                                                                                                                                                                                                                                                                                                                                                                                                                                                                                                                                                                                                                                                                                                                                                                                                                                                                                                                                                                                                                                                                                                                                                                                                                                                                                                                                                                                                                                                                                                                                                                                                                                                                                                                                                                                                                                                                                                                                                                                                                                                                                                                                                                                                                                                                                                                                                                                                                                                                                                                                                                                                           | 0.40   | 73.89   | 1.39    | 12.81            | 85.63          | 14.90                                                                               | 72.08                           | 12.96                      | 28.11                       | 8.46               | 11.55   | 11.50       | 27.35                 | 8.92                                                                        | 8.50                  | 15.21   | 16.63                 | 10.46                 | 23.17                 | 14.92                 | 90.39                 | 11.65                  | 100.00                 | 7.42                   | 6.86     |         |         |                       |         |                       |         |                       |                       |                       |                       |                       |                        |                        |                        |          |                         |      |       |      |      |       |      |       |      |      |      |      |      |      |      |      |      |      |      |      |      |       |      |       |      |      |                       |      |       |      |       |       |       |       |       |       |      |       |       |       |      |      |       |       |       |       |       |       |       |        |      |      |       |      |      |      |      |      |       |      |       |      |      |      |      |      |      |      |      |      |      |      |      |      |      |      |      |      |          |    |    |   |    |    |    |    |    |    |    |    |    |    |     |     |     |     |     |     |     |     |     |     |     |     |           |      |       |       |      |      |      |      |      |      |      |      |      |     |     |     |     |     |     |     |     |     |      |     |      |      |  |  |  |  |  |       |  |      |  |  |  |  |  |  |  |  |  |  |  |  |  |  |  |  |  |  |  |  |  |  |  |      |  |     |  |  |  |  |  |  |  |  |  |  |  |  |  |  |  |  |  |  |  |  |  |  |  |  |  |    |  |  |  |  |  |  |  |  |  |  |  |  |  |  |  |  |  |  |  |  |  |  |  |  |  |      |  |  |  |  |  |  |  |  |  |  |  |  |  |  |  |  |  |  |
| Score                                                                                                                                                                                                                                                                                                                                                                                                                                                                                                                                                                                                                                                                                                                                                                                                                                                                                                                                                                                                                                                                                                                                                                                                                                                                                                                                                                                                                                                                                                                                                                                                                                                                                                                                                                                                                                                                                                                                                                                                                                                                                                                                                                                                                                                                                                                                                                                                                                                                                                                                                                                                                                                                                                                                                                                                                                                                                                                                                                                                                                                                                                                                                                                                                                                                                                                                                                                                                                                                                                                                                                                                                                                                                                                                                                                                           | 0.50   | 0.50    | 1.00    | 1.50             | 0.50           | -0.15                                                                               | 1.50                            | -0.13                      | 1.50                        | 1.50               | 1.50    | 1.50        | 1.50                  | 1.50                                                                        | 1.50                  | 1.50    | 1.50                  | 1.50                  | 1.50                  | 1.50                  | 1.50                  | 1.50                   | 1.50                   | 1.50                   | 1.50     |         |         |                       |         |                       |         |                       |                       |                       |                       |                       |                        |                        |                        |          |                         |      |       |      |      |       |      |       |      |      |      |      |      |      |      |      |      |      |      |      |      |       |      |       |      |      |                       |      |       |      |       |       |       |       |       |       |      |       |       |       |      |      |       |       |       |       |       |       |       |        |      |      |       |      |      |      |      |      |       |      |       |      |      |      |      |      |      |      |      |      |      |      |      |      |      |      |      |      |          |    |    |   |    |    |    |    |    |    |    |    |    |    |     |     |     |     |     |     |     |     |     |     |     |     |           |      |       |       |      |      |      |      |      |      |      |      |      |     |     |     |     |     |     |     |     |     |      |     |      |      |  |  |  |  |  |       |  |      |  |  |  |  |  |  |  |  |  |  |  |  |  |  |  |  |  |  |  |  |  |  |  |      |  |     |  |  |  |  |  |  |  |  |  |  |  |  |  |  |  |  |  |  |  |  |  |  |  |  |  |    |  |  |  |  |  |  |  |  |  |  |  |  |  |  |  |  |  |  |  |  |  |  |  |  |  |      |  |  |  |  |  |  |  |  |  |  |  |  |  |  |  |  |  |  |
| Ion-type                                                                                                                                                                                                                                                                                                                                                                                                                                                                                                                                                                                                                                                                                                                                                                                                                                                                                                                                                                                                                                                                                                                                                                                                                                                                                                                                                                                                                                                                                                                                                                                                                                                                                                                                                                                                                                                                                                                                                                                                                                                                                                                                                                                                                                                                                                                                                                                                                                                                                                                                                                                                                                                                                                                                                                                                                                                                                                                                                                                                                                                                                                                                                                                                                                                                                                                                                                                                                                                                                                                                                                                                                                                                                                                                                                                                        | KQ     | a1      | F       | y2               | a2             | b2                                                                                  | y3                              | y4                         | y5                          | y6                 | y7      | y8          | y9                    | y10                                                                         | y11                   | y12     | y13                   | y14                   | y15                   | y16                   | y17                   | y18                    | y19                    | y20                    | y21      |         |         |                       |         |                       |         |                       |                       |                       |                       |                       |                        |                        |                        |          |                         |      |       |      |      |       |      |       |      |      |      |      |      |      |      |      |      |      |      |      |      |       |      |       |      |      |                       |      |       |      |       |       |       |       |       |       |      |       |       |       |      |      |       |       |       |       |       |       |       |        |      |      |       |      |      |      |      |      |       |      |       |      |      |      |      |      |      |      |      |      |      |      |      |      |      |      |      |      |          |    |    |   |    |    |    |    |    |    |    |    |    |    |     |     |     |     |     |     |     |     |     |     |     |     |           |      |       |       |      |      |      |      |      |      |      |      |      |     |     |     |     |     |     |     |     |     |      |     |      |      |  |  |  |  |  |       |  |      |  |  |  |  |  |  |  |  |  |  |  |  |  |  |  |  |  |  |  |  |  |  |  |      |  |     |  |  |  |  |  |  |  |  |  |  |  |  |  |  |  |  |  |  |  |  |  |  |  |  |  |    |  |  |  |  |  |  |  |  |  |  |  |  |  |  |  |  |  |  |  |  |  |  |  |  |  |      |  |  |  |  |  |  |  |  |  |  |  |  |  |  |  |  |  |  |
| Delta ppm                                                                                                                                                                                                                                                                                                                                                                                                                                                                                                                                                                                                                                                                                                                                                                                                                                                                                                                                                                                                                                                                                                                                                                                                                                                                                                                                                                                                                                                                                                                                                                                                                                                                                                                                                                                                                                                                                                                                                                                                                                                                                                                                                                                                                                                                                                                                                                                                                                                                                                                                                                                                                                                                                                                                                                                                                                                                                                                                                                                                                                                                                                                                                                                                                                                                                                                                                                                                                                                                                                                                                                                                                                                                                                                                                                                                       | -2.1   | -23.5   | -12.3   | -0.8             | -4.4           | -3.6                                                                                | -6.6                            | -3.6                       | -8.3                        | -1.8               | -1.6    | -5.7        | 5.9                   | 3.3                                                                         | 6.8                   | 0.3     | 1.5                   | 0.3                   | 1.8                   | 9.3                   | 1.8                   | -1.3                   | 8.6                    | 25.2                   | -6.4     |         |         |                       |         |                       |         |                       |                       |                       |                       |                       |                        |                        |                        |          |                         |      |       |      |      |       |      |       |      |      |      |      |      |      |      |      |      |      |      |      |      |       |      |       |      |      |                       |      |       |      |       |       |       |       |       |       |      |       |       |       |      |      |       |       |       |       |       |       |       |        |      |      |       |      |      |      |      |      |       |      |       |      |      |      |      |      |      |      |      |      |      |      |      |      |      |      |      |      |          |    |    |   |    |    |    |    |    |    |    |    |    |    |     |     |     |     |     |     |     |     |     |     |     |     |           |      |       |       |      |      |      |      |      |      |      |      |      |     |     |     |     |     |     |     |     |     |      |     |      |      |  |  |  |  |  |       |  |      |  |  |  |  |  |  |  |  |  |  |  |  |  |  |  |  |  |  |  |  |  |  |  |      |  |     |  |  |  |  |  |  |  |  |  |  |  |  |  |  |  |  |  |  |  |  |  |  |  |  |  |    |  |  |  |  |  |  |  |  |  |  |  |  |  |  |  |  |  |  |  |  |  |  |  |  |  |      |  |  |  |  |  |  |  |  |  |  |  |  |  |  |  |  |  |  |
|                                                                                                                                                                                                                                                                                                                                                                                                                                                                                                                                                                                                                                                                                                                                                                                                                                                                                                                                                                                                                                                                                                                                                                                                                                                                                                                                                                                                                                                                                                                                                                                                                                                                                                                                                                                                                                                                                                                                                                                                                                                                                                                                                                                                                                                                                                                                                                                                                                                                                                                                                                                                                                                                                                                                                                                                                                                                                                                                                                                                                                                                                                                                                                                                                                                                                                                                                                                                                                                                                                                                                                                                                                                                                                                                                                                                                 |        |         |         |                  | Fl-28          |                                                                                     | y++5                            |                            |                             |                    |         |             |                       |                                                                             |                       |         |                       |                       |                       |                       |                       |                        |                        |                        |          |         |         |                       |         |                       |         |                       |                       |                       |                       |                       |                        |                        |                        |          |                         |      |       |      |      |       |      |       |      |      |      |      |      |      |      |      |      |      |      |      |      |       |      |       |      |      |                       |      |       |      |       |       |       |       |       |       |      |       |       |       |      |      |       |       |       |       |       |       |       |        |      |      |       |      |      |      |      |      |       |      |       |      |      |      |      |      |      |      |      |      |      |      |      |      |      |      |      |      |          |    |    |   |    |    |    |    |    |    |    |    |    |    |     |     |     |     |     |     |     |     |     |     |     |     |           |      |       |       |      |      |      |      |      |      |      |      |      |     |     |     |     |     |     |     |     |     |      |     |      |      |  |  |  |  |  |       |  |      |  |  |  |  |  |  |  |  |  |  |  |  |  |  |  |  |  |  |  |  |  |  |  |      |  |     |  |  |  |  |  |  |  |  |  |  |  |  |  |  |  |  |  |  |  |  |  |  |  |  |  |    |  |  |  |  |  |  |  |  |  |  |  |  |  |  |  |  |  |  |  |  |  |  |  |  |  |      |  |  |  |  |  |  |  |  |  |  |  |  |  |  |  |  |  |  |
|                                                                                                                                                                                                                                                                                                                                                                                                                                                                                                                                                                                                                                                                                                                                                                                                                                                                                                                                                                                                                                                                                                                                                                                                                                                                                                                                                                                                                                                                                                                                                                                                                                                                                                                                                                                                                                                                                                                                                                                                                                                                                                                                                                                                                                                                                                                                                                                                                                                                                                                                                                                                                                                                                                                                                                                                                                                                                                                                                                                                                                                                                                                                                                                                                                                                                                                                                                                                                                                                                                                                                                                                                                                                                                                                                                                                                 |        |         |         |                  | -4.4           |                                                                                     | 8.3                             |                            |                             |                    |         |             |                       |                                                                             |                       |         |                       |                       |                       |                       |                       |                        |                        |                        |          |         |         |                       |         |                       |         |                       |                       |                       |                       |                       |                        |                        |                        |          |                         |      |       |      |      |       |      |       |      |      |      |      |      |      |      |      |      |      |      |      |      |       |      |       |      |      |                       |      |       |      |       |       |       |       |       |       |      |       |       |       |      |      |       |       |       |       |       |       |       |        |      |      |       |      |      |      |      |      |       |      |       |      |      |      |      |      |      |      |      |      |      |      |      |      |      |      |      |      |          |    |    |   |    |    |    |    |    |    |    |    |    |    |     |     |     |     |     |     |     |     |     |     |     |     |           |      |       |       |      |      |      |      |      |      |      |      |      |     |     |     |     |     |     |     |     |     |      |     |      |      |  |  |  |  |  |       |  |      |  |  |  |  |  |  |  |  |  |  |  |  |  |  |  |  |  |  |  |  |  |  |  |      |  |     |  |  |  |  |  |  |  |  |  |  |  |  |  |  |  |  |  |  |  |  |  |  |  |  |  |    |  |  |  |  |  |  |  |  |  |  |  |  |  |  |  |  |  |  |  |  |  |  |  |  |  |      |  |  |  |  |  |  |  |  |  |  |  |  |  |  |  |  |  |  |
|                                                                                                                                                                                                                                                                                                                                                                                                                                                                                                                                                                                                                                                                                                                                                                                                                                                                                                                                                                                                                                                                                                                                                                                                                                                                                                                                                                                                                                                                                                                                                                                                                                                                                                                                                                                                                                                                                                                                                                                                                                                                                                                                                                                                                                                                                                                                                                                                                                                                                                                                                                                                                                                                                                                                                                                                                                                                                                                                                                                                                                                                                                                                                                                                                                                                                                                                                                                                                                                                                                                                                                                                                                                                                                                                                                                                                 |        |         |         |                  |                |                                                                                     | Fl                              |                            |                             |                    |         |             |                       |                                                                             |                       |         |                       |                       |                       |                       |                       |                        |                        |                        |          |         |         |                       |         |                       |         |                       |                       |                       |                       |                       |                        |                        |                        |          |                         |      |       |      |      |       |      |       |      |      |      |      |      |      |      |      |      |      |      |      |      |       |      |       |      |      |                       |      |       |      |       |       |       |       |       |       |      |       |       |       |      |      |       |       |       |       |       |       |       |        |      |      |       |      |      |      |      |      |       |      |       |      |      |      |      |      |      |      |      |      |      |      |      |      |      |      |      |      |          |    |    |   |    |    |    |    |    |    |    |    |    |    |     |     |     |     |     |     |     |     |     |     |     |     |           |      |       |       |      |      |      |      |      |      |      |      |      |     |     |     |     |     |     |     |     |     |      |     |      |      |  |  |  |  |  |       |  |      |  |  |  |  |  |  |  |  |  |  |  |  |  |  |  |  |  |  |  |  |  |  |  |      |  |     |  |  |  |  |  |  |  |  |  |  |  |  |  |  |  |  |  |  |  |  |  |  |  |  |  |    |  |  |  |  |  |  |  |  |  |  |  |  |  |  |  |  |  |  |  |  |  |  |  |  |  |      |  |  |  |  |  |  |  |  |  |  |  |  |  |  |  |  |  |  |
|                                                                                                                                                                                                                                                                                                                                                                                                                                                                                                                                                                                                                                                                                                                                                                                                                                                                                                                                                                                                                                                                                                                                                                                                                                                                                                                                                                                                                                                                                                                                                                                                                                                                                                                                                                                                                                                                                                                                                                                                                                                                                                                                                                                                                                                                                                                                                                                                                                                                                                                                                                                                                                                                                                                                                                                                                                                                                                                                                                                                                                                                                                                                                                                                                                                                                                                                                                                                                                                                                                                                                                                                                                                                                                                                                                                                                 |        |         |         |                  |                |                                                                                     | -3.6                            |                            |                             |                    |         |             |                       |                                                                             |                       |         |                       |                       |                       |                       |                       |                        |                        |                        |          |         |         |                       |         |                       |         |                       |                       |                       |                       |                       |                        |                        |                        |          |                         |      |       |      |      |       |      |       |      |      |      |      |      |      |      |      |      |      |      |      |      |       |      |       |      |      |                       |      |       |      |       |       |       |       |       |       |      |       |       |       |      |      |       |       |       |       |       |       |       |        |      |      |       |      |      |      |      |      |       |      |       |      |      |      |      |      |      |      |      |      |      |      |      |      |      |      |      |      |          |    |    |   |    |    |    |    |    |    |    |    |    |    |     |     |     |     |     |     |     |     |     |     |     |     |           |      |       |       |      |      |      |      |      |      |      |      |      |     |     |     |     |     |     |     |     |     |      |     |      |      |  |  |  |  |  |       |  |      |  |  |  |  |  |  |  |  |  |  |  |  |  |  |  |  |  |  |  |  |  |  |  |      |  |     |  |  |  |  |  |  |  |  |  |  |  |  |  |  |  |  |  |  |  |  |  |  |  |  |  |    |  |  |  |  |  |  |  |  |  |  |  |  |  |  |  |  |  |  |  |  |  |  |  |  |  |      |  |  |  |  |  |  |  |  |  |  |  |  |  |  |  |  |  |  |

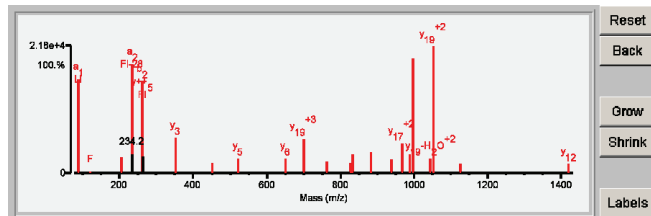

Result Summary

| Rank | Score | SP1 (%) | BCS | # Unmatched Ions | Variable sites | Sequence                  | MH <sup>+</sup> Calculated (Da) | MH <sup>+</sup> Error (Da) | MH <sup>+</sup> Error (ppm) | Protein MW/PI (Da) | Species | Accession # | Protein Name                                                                    |
|------|-------|---------|-----|------------------|----------------|---------------------------|---------------------------------|----------------------------|-----------------------------|--------------------|---------|-------------|---------------------------------------------------------------------------------|
| 1    | 18.01 | 74.4    | 10  | 7/25             | K167k          | (R)STGEAFVQFASQEIAEKAL(K) | 2154.1077                       | 114.0551                   | 5.4                         | 49229.7/5.89       | HUMAN   | P31943      | Heterogeneous nuclear ribonucleoprotein H OS=Homo sapiens GN=HNRNPH1 PE=1 SV=4  |
| 1    | 18.01 | 74.4    | 10  | 7/25             | K167k          | (R)STGEAFVQFASQEIAEKAL(K) | 2154.1077                       | 114.0551                   | 5.4                         | 49263.9/5.89       | HUMAN   | P55795      | Heterogeneous nuclear ribonucleoprotein H2 OS=Homo sapiens GN=HNRNPH2 PE=1 SV=1 |
| 2    | 16.12 | 71.1    | 9   | 8/25             | K170k          | (R)STGEAFVQFASQEIAEKAL(K) | 2154.1077                       | 114.0551                   | 5.4                         | 49229.7/5.89       | HUMAN   | P31943      | Heterogeneous nuclear ribonucleoprotein H OS=Homo sapiens GN=HNRNPH1 PE=1 SV=4  |
| 2    | 16.12 | 71.1    | 9   | 8/25             | K170k          | (R)STGEAFVQFASQEIAEKAL(K) | 2154.1077                       | 114.0551                   | 5.4                         | 49263.9/5.89       | HUMAN   | P55795      | Heterogeneous nuclear ribonucleoprotein H2 OS=Homo sapiens GN=HNRNPH2 PE=1 SV=1 |

Detailed Results

| Rank | Score | SP1 (%) | BCS | # Unmatched Ions | Variable sites | Sequence                                                             | MH <sup>+</sup> Calculated (Da) | MH <sup>+</sup> Error (Da) | MH <sup>+</sup> Error (ppm) | Protein MW/PI (Da) | Species | Accession # | MS-Digest Index # | Protein Name                                                                    |
|------|-------|---------|-----|------------------|----------------|----------------------------------------------------------------------|---------------------------------|----------------------------|-----------------------------|--------------------|---------|-------------|-------------------|---------------------------------------------------------------------------------|
| 1    | 18.01 | 74.4    | 10  | 7/25             | K167k          | (R)S T   G E / A / F / V / Q / F A / S Q E I / A / E / k / A L K (K) | 2154.1077                       | 114.0551                   | 5.4                         | 49229.7/5.89       | HUMAN   | P31943      | 293887            | Heterogeneous nuclear ribonucleoprotein H OS=Homo sapiens GN=HNRNPH1 PE=1 SV=4  |
| 1    | 18.01 | 74.4    | 10  | 7/25             | K167k          | (R)S T   G E / A / F / V / Q / F A / S Q E I / A / E / k / A L K (K) | 2154.1077                       | 114.0551                   | 5.4                         | 49263.9/5.89       | HUMAN   | P55795      | 293595            | Heterogeneous nuclear ribonucleoprotein H2 OS=Homo sapiens GN=HNRNPH2 PE=1 SV=1 |

| Fragment-Ion (m/z)     | 70.065 | 72.080 | 84.078 | 86.093 | 120.082 | 143.078 | 161.094 | 189.085 | 200.137 | 258.111 | 259.108 | 331.234 | 427.262 | 488.262 | 573.361           | 615.817 <sup>+2</sup> | 702.404           | 724.876 <sup>+2</sup> | 773.455           | 838.460 <sup>+2</sup> | 912.001 <sup>+2</sup> | 947.521 <sup>+2</sup> | 1040.537          | 1041.052 | 1230.693 |
|------------------------|--------|--------|--------|--------|---------|---------|---------|---------|---------|---------|---------|---------|---------|---------|-------------------|-----------------------|-------------------|-----------------------|-------------------|-----------------------|-----------------------|-----------------------|-------------------|----------|----------|
| Frac. Inten.(% of TIC) | 0.08   | 0.20   | 0.17   | 5.63   | 0.10    | 4.05    | 8.56    | 6.61    | 2.98    | 5.01    | 2.73    | 3.30    | 3.00    | 2.60    | 3.38              | 3.38                  | 5.04              | 3.16                  | 5.17              | 6.57                  | 76.84                 | 3.52                  | 6.74              | 7.48     | 2.92     |
| Rel. Inten.(% of BP)   | 0.94   | 2.35   | 2.04   | 65.85  | 1.21    | 47.37   | 100.00  | 77.23   | 34.85   | 58.54   | 31.94   | 38.52   | 35.06   | 30.44   | 39.55             | 39.55                 | 58.95             | 36.91                 | 60.42             | 76.84                 | 88.83                 | 41.11                 | 78.75             | 87.45    | 34.18    |
| Score                  | -0.01  | 0.50   | 0.50   | -0.66  | 1.00    | -0.47   | 0.50    | 0.50    | -0.35   | 0.75    | -0.32   | 1.50    | 0.75    | -0.30   | 1.50              | 1.50                  | 1.50              | 1.50                  | 1.50              | 1.50                  | 1.50                  | 1.50                  | 1.50              | -0.87    | 1.50     |
| Ion-type               | V      | KQ     | KQ     | KQ     | F       | F       | a2      | b2      | QE      | QE      | y3      | kAL     | y4      | y4      | y10 <sup>+2</sup> | y5                    | y12 <sup>+2</sup> | y6                    | y14 <sup>+2</sup> | y6                    | y15 <sup>+2</sup>     | y16 <sup>+2</sup>     | y <sup>++18</sup> | y10      | y10      |
| Delta ppm              | -9.4   | -31.8  |        |        | 6.9     |         | 5.2     | -16.3   |         | 6.8     | -0.9    | -13.4   |         |         | -18.3             | -35.0                 | -15.5             | -20.3                 | 4.7               | 6.4                   | 14.0                  | 15.1                  | -2.3              | 19.7     |          |

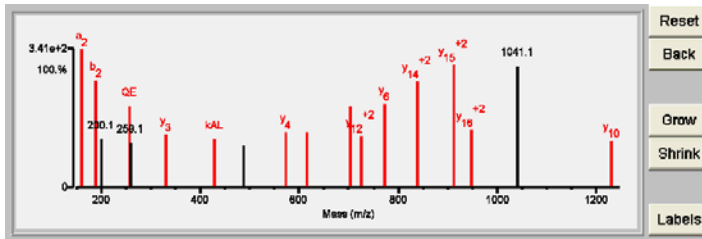

Result Summary

| Rank | Score | SPI (%) | BCS | # Unmatched Ions | Variable sites | Sequence                                                                | MH <sup>+</sup> Calculated (Da) | MH <sup>+</sup> Error (Da) | MH <sup>+</sup> Error (ppm) | Protein MW (Da) | Species | Accession # | Protein Name                                                                  |
|------|-------|---------|-----|------------------|----------------|-------------------------------------------------------------------------|---------------------------------|----------------------------|-----------------------------|-----------------|---------|-------------|-------------------------------------------------------------------------------|
| 1    | 18.38 | 91.6    | 13  | 3/25             | K62k           | (R) L K T D N A G D H G G G G G G G A G A M G G G G G E N Y D P H K (T) | 3222.3816                       | 114.0598                   | 5.1                         | 64133.1/8.46    | HUMAN   | P14886      | Heterogeneous nuclear ribonucleoprotein L OS=Homo sapiens GN=HNRNPL PE=1 SV=2 |

Detailed Results

| Rank                    | Score  | SPI (%) | BCS     | # Unmatched Ions | Variable sites | Sequence                                                            | MH <sup>+</sup> Calculated (Da) | MH <sup>+</sup> Error (Da) | MH <sup>+</sup> Error (ppm) | Protein MW (Da)       | Species               | Accession #           | MS-Digest Index #     | Protein Name                                                                  |                       |                       |                       |                       |                       |         |                       |                       |                       |         |                       |      |
|-------------------------|--------|---------|---------|------------------|----------------|---------------------------------------------------------------------|---------------------------------|----------------------------|-----------------------------|-----------------------|-----------------------|-----------------------|-----------------------|-------------------------------------------------------------------------------|-----------------------|-----------------------|-----------------------|-----------------------|-----------------------|---------|-----------------------|-----------------------|-----------------------|---------|-----------------------|------|
| 1                       | 18.38  | 91.6    | 13      | 3/25             | K62k           | (R) L K T D N A G D H G G G G G G A G A M G G G G E N Y D P H K (T) | 3222.3816                       | 114.0598                   | 5.1                         | 64133.1/8.46          | HUMAN                 | P14886                | 293671                | Heterogeneous nuclear ribonucleoprotein L OS=Homo sapiens GN=HNRNPL PE=1 SV=2 |                       |                       |                       |                       |                       |         |                       |                       |                       |         |                       |      |
| Fragment-ion (m/z)      | 84.079 | 87.056  | 110.068 | 115.049          | 129.065        | 147.112                                                             | 235.122                         | 363.214                    | 381.221                     | 512.898 <sup>+3</sup> | 531.902 <sup>+3</sup> | 550.915 <sup>+3</sup> | 569.931 <sup>+3</sup> | 611.269                                                                       | 651.759 <sup>+2</sup> | 680.285 <sup>+2</sup> | 715.795 <sup>+2</sup> | 740.346 <sup>+2</sup> | 768.274 <sup>+2</sup> | 780.342 | 797.345 <sup>+2</sup> | 845.364 <sup>+2</sup> | 854.369 <sup>+2</sup> | 888.392 | 918.427 <sup>+2</sup> |      |
| Frac. Inten. (% of TIC) | 0.18   | 2.02    | 0.07    | 2.53             | 4.67           | 2.21                                                                | 5.96                            | 2.42                       | 7.99                        | 4.71                  | 3.68                  | 5.12                  | 3.66                  | 1.91                                                                          | 4.50                  | 6.95                  | 3.41                  | 2.76                  | 3.50                  | 2.48    | 3.44                  | 4.24                  | 13.61                 | 3.30    | 5.08                  |      |
| Rel. Inten. (% of BP)   | 1.29   | 14.85   | 0.51    | 18.56            | 34.32          | 16.25                                                               | 40.86                           | 17.77                      | 58.73                       | 34.63                 | 27.08                 | 29.33                 | 14.05                 | 33.09                                                                         | 51.10                 | 25.05                 | 20.25                 | 25.09                 | 19.26                 | 25.25   | 31.12                 | 100.00                | 24.27                 | 37.34   |                       |      |
| Score                   | 0.50   | 0.50    | 1.00    | 0.75             | 0.75           | 1.50                                                                | 0.75                            | 1.50                       | 0.50                        | 0.50                  | 0.50                  | 0.50                  | 1.50                  | 1.50                                                                          | 1.50                  | 1.50                  | 1.50                  | 0.50                  | -0.26                 | -0.18   | 0.50                  | 0.25                  | 0.50                  | 1.50    | 0.50                  |      |
| Ion-type                | KQ     | NR      | H       | GG               | QKR            | y1                                                                  | PH                              |                            | y3                          | b16 <sup>+3</sup>     | b17 <sup>+3</sup>     | b18 <sup>+3</sup>     | b19 <sup>+3</sup>     | y5                                                                            | y13 <sup>+2</sup>     | y14 <sup>+2</sup>     | y15 <sup>+2</sup>     | b15 <sup>+2</sup>     |                       |         | b17 <sup>+2</sup>     | b19-H2O <sup>+2</sup> | b19 <sup>+2</sup>     | y7      | b21 <sup>+2</sup>     |      |
| Delta ppm               | -16.4  | 3.6     | -29.7   | -6.1             | -3.5           | AC                                                                  | -2.7                            | 12.5                       |                             | -8.6                  | 0.4                   | -5.0                  | 5.2                   | 19.9                                                                          | -16.0                 | -18.7                 | 4.5                   | -6.7                  | 18.7                  |         |                       | -10.4                 | -7.0                  | -7.3    | 8.2                   | 24.7 |

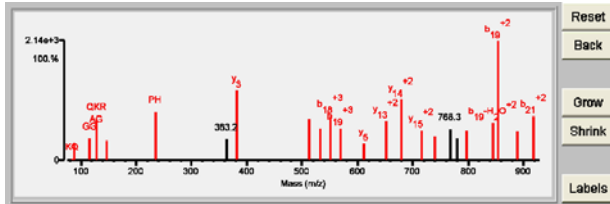



Result Summary

| Rank | Score | SPI (%) | BCS | # Unmatched Ions | Variable sites | Sequence               | MH <sup>+</sup> Calculated (Da) | MH <sup>+</sup> Error (Da) | MH <sup>+</sup> Error (ppm) | Protein MW/pl (Da) | Species | Accession # | Protein Name                                                                                 |
|------|-------|---------|-----|------------------|----------------|------------------------|---------------------------------|----------------------------|-----------------------------|--------------------|---------|-------------|----------------------------------------------------------------------------------------------|
| 1    | 18.08 | 78.3    | 9   | 7/25             | K667k          | (R)NLPPDFTWKMLK(D)     | 1539.8028                       | 114.0545                   | 7.0                         | 77516.1/8.85       | HUMAN   | P52272      | Heterogeneous nuclear ribonucleoprotein M OS=Homo sapiens GN=HNRNPM PE=1 SV=3                |
| 2    | 14.85 | 73.1    | 7   | 9/25             | K670k          | (R)NLPPDFTWKMLK(D)     | 1539.8028                       | 114.0545                   | 7.0                         | 77516.1/8.85       | HUMAN   | P52272      | Heterogeneous nuclear ribonucleoprotein M OS=Homo sapiens GN=HNRNPM PE=1 SV=3                |
| 3    | 7.68  | 61.5    | 3   | 14/25            | None           | (R)LNPNNTTVKQSYFGGK(R) | 1653.8595                       | -0.0021                    | -1.3                        | 51260.7/5.88       | HUMAN   | RQ92484     | REVERSE Acid sphingomyelinase-like phosphodiesterase 3a OS=Homo sapiens GN=SMPDL3A PE=1 SV=2 |
| 4    | 7.66  | 58.1    | 3   | 14/25            | K434k          | (R)AVGPSPAPAGIGGFVK(R) | 1539.8278                       | 114.0295                   | -8.1                        | 173104.0/7.18      | HUMAN   | RQ43426     | REVERSE Synaptotagmin-1 OS=Homo sapiens GN=SYNJ1 PE=1 SV=2                                   |
| 5    | 7.05  | 63.1    | 2   | 15/25            | None           | (K)LNNLVLFDKATYDK(L)   | 1653.8846                       | -0.0273                    | -16.5                       | 13742.2/10.12      | HUMAN   | P62851      | 40S ribosomal protein S25 OS=Homo sapiens GN=RPS25 PE=1 SV=1                                 |

Detailed Results

| Rank | Score | SPI (%) | BCS | # Unmatched Ions | Variable sites | Sequence           | MH <sup>+</sup> Calculated (Da) | MH <sup>+</sup> Error (Da) | MH <sup>+</sup> Error (ppm) | Protein MW/pl (Da) | Species | Accession # | MS-Digest Index # | Protein Name                                                                  |
|------|-------|---------|-----|------------------|----------------|--------------------|---------------------------------|----------------------------|-----------------------------|--------------------|---------|-------------|-------------------|-------------------------------------------------------------------------------|
| 1    | 18.08 | 78.3    | 9   | 7/25             | K667k          | (R)NLPPDFTWKMLK(D) | 1539.8028                       | 114.0545                   | 7.0                         | 77516.1/8.85       | HUMAN   | P52272      | 293675            | Heterogeneous nuclear ribonucleoprotein M OS=Homo sapiens GN=HNRNPM PE=1 SV=3 |

  

| Fragment-ion (m/z)      | 70.066 | 84.081 | 86.097 | 87.052 | 89.059 | 120.082 | 133.087 | 147.112 | 155.119 | 183.113 | 200.141 | 201.140 | 217.133 | 228.135 | 360.153        | 391.238 | 476.250*3      | 633.373                       | 665.329*2      | 713.861*2                    | 775.422*2                     | 819.455        | 920.498        | 1067.566       | 1182.595       |
|-------------------------|--------|--------|--------|--------|--------|---------|---------|---------|---------|---------|---------|---------|---------|---------|----------------|---------|----------------|-------------------------------|----------------|------------------------------|-------------------------------|----------------|----------------|----------------|----------------|
| Frac. Inten. (% of TIC) | 0.01   | 0.07   | 0.38   | 0.06   | 2.09   | 0.10    | 1.58    | 3.27    | 3.01    | 3.80    | 22.24   | 2.09    | 7.35    | 3.71    | 4.85           | 1.90    | 1.79           | 3.00                          | 1.81           | 23.31                        | 1.76                          | 3.17           | 2.84           | 2.08           | 3.71           |
| Rel. Inten. (% of BP)   | 0.04   | 0.31   | 1.64   | 0.27   | 8.98   | 0.42    | 6.79    | 14.04   | 12.91   | 16.28   | 95.41   | 8.98    | 31.52   | 15.92   | 20.79          | 8.15    | 7.67           | 12.88                         | 7.75           | 100.00                       | 7.54                          | 13.61          | 12.19          | 8.92           | 15.93          |
| Score                   | 0.20   | 0.50   | 0.22   | 0.33   | -0.09  | 1.00    | -0.07   | 1.50    | -0.13   | -0.16   | 0.50    | -0.09   | -0.32   | 0.50    | 0.75           | 1.50    | 1.50           | 1.50                          | 1.50           | 1.50                         | 1.50                          | 1.50           | 1.50           | 1.50           | 1.50           |
| Ion-type                | PR     | KQ     | KQ     | LI     | NR     |         | F       |         |         |         |         |         |         |         | b <sub>2</sub> | PFD     | y <sub>3</sub> | y <sub>10</sub> <sup>+3</sup> | y <sub>4</sub> | y <sub>5</sub> <sup>+2</sup> | y <sub>10</sub> <sup>+2</sup> | y <sub>5</sub> | y <sub>6</sub> | y <sub>7</sub> | y <sub>8</sub> |
| Delta ppm               | 18.2   | 0.3    | 12.5   | -34.3  |        | 7.7     | -2.7    |         |         |         |         |         |         |         | -9.4           | 2.4     | 12.5           | -3.9                          | -11.8          | -2.6                         |                               | -0.1           | -4.6           | -3.9           | -1.8           |

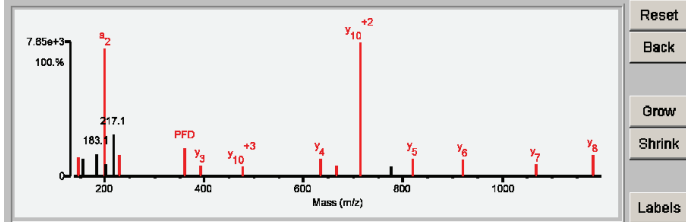

Result Summary

| Rank | Score | SPI (%) | BCS | # Unmatched Ions | Variable sites    | Sequence                | MH <sup>+</sup> Calculated (Da) | MH <sup>+</sup> Error (Da) | MH <sup>+</sup> Error (ppm) | Protein MW/pl (Da) | Species | Accession # | Protein Name                                                                    |
|------|-------|---------|-----|------------------|-------------------|-------------------------|---------------------------------|----------------------------|-----------------------------|--------------------|---------|-------------|---------------------------------------------------------------------------------|
| 1    | 16.11 | 84.4    | 5   | 6/25             | K83k              | (R)AFITNIPFDVkwQSLk(D)  | 1907.0425                       | 114.0511                   | 4.0                         | 77516.1/8.85       | HUMAN   | P52272      | Heterogeneous nuclear ribonucleoprotein MOS=Homo sapiens GN=HNRNPM PE=1 SV=3    |
| 2    | 14.50 | 82.5    | 4   | 7/25             | K88k              | (R)AFITNIPFDVkwQSLk(D)  | 1907.0425                       | 114.0511                   | 4.0                         | 77516.1/8.85       | HUMAN   | P52272      | Heterogeneous nuclear ribonucleoprotein MOS=Homo sapiens GN=HNRNPM PE=1 SV=3    |
| 3    | 5.05  | 55.6    | 2   | 11/25            | M262m K263k K270k | (R)SLLASGmklNESVTkAk(N) | 1776.9888                       | 244.1049                   | 11.9                        | 93697.3/7.82       | HUMAN   | RQ9UJA3     | REVERSE DNA replication licensing factor MCM8 OS=Homo sapiens GN=MCM8 PE=1 SV=2 |
| 4    | 4.50  | 50.7    | 2   | 12/25            | M262m K263k K272k | (R)SLLASGmklNESVTkAk(N) | 1776.9888                       | 244.1049                   | 11.9                        | 93697.3/7.82       | HUMAN   | RQ9UJA3     | REVERSE DNA replication licensing factor MCM8 OS=Homo sapiens GN=MCM8 PE=1 SV=2 |

Detailed Results

| Rank                                                                                                                                                                                                                                                                                                                                                                                                                                                                                                                                                                                                                                                                                                                                                                                                                                                                                                                                                                                                                                                                                                                                                                                                                                                                                                                                                                                                                                                                                                                                                                                                                                                                                                                                                                                                                                                                                                                                                                                                                                                                                                                                                                                                                                                                                                                                                                                                                                                                                                              | Score  | SPI (%) | BCS    | # Unmatched Ions | Variable sites | Sequence                               | MH <sup>+</sup> Calculated (Da) | MH <sup>+</sup> Error (Da) | MH <sup>+</sup> Error (ppm) | Protein MW/pl (Da) | Species | Accession # | MS-Digest Index # | Protein Name                                                                  |                    |         |         |           |           |           |           |           |         |         |          |         |         |         |         |         |         |         |           |           |           |           |           |         |         |          |                         |      |      |      |      |      |       |      |      |      |      |      |      |      |      |      |      |      |      |      |       |      |      |      |      |      |                       |      |      |      |      |      |       |       |      |       |       |       |      |       |       |       |       |       |       |       |        |       |       |       |       |       |       |      |      |       |      |       |      |       |      |      |      |      |      |      |      |      |      |      |       |       |      |      |      |      |       |      |          |   |    |  |   |    |       |    |    |    |    |         |     |    |         |      |  |  |  |  |       |       |       |       |     |  |           |     |     |  |     |     |  |  |      |       |      |      |      |     |      |      |      |       |  |  |      |     |     |      |      |  |
|-------------------------------------------------------------------------------------------------------------------------------------------------------------------------------------------------------------------------------------------------------------------------------------------------------------------------------------------------------------------------------------------------------------------------------------------------------------------------------------------------------------------------------------------------------------------------------------------------------------------------------------------------------------------------------------------------------------------------------------------------------------------------------------------------------------------------------------------------------------------------------------------------------------------------------------------------------------------------------------------------------------------------------------------------------------------------------------------------------------------------------------------------------------------------------------------------------------------------------------------------------------------------------------------------------------------------------------------------------------------------------------------------------------------------------------------------------------------------------------------------------------------------------------------------------------------------------------------------------------------------------------------------------------------------------------------------------------------------------------------------------------------------------------------------------------------------------------------------------------------------------------------------------------------------------------------------------------------------------------------------------------------------------------------------------------------------------------------------------------------------------------------------------------------------------------------------------------------------------------------------------------------------------------------------------------------------------------------------------------------------------------------------------------------------------------------------------------------------------------------------------------------|--------|---------|--------|------------------|----------------|----------------------------------------|---------------------------------|----------------------------|-----------------------------|--------------------|---------|-------------|-------------------|-------------------------------------------------------------------------------|--------------------|---------|---------|-----------|-----------|-----------|-----------|-----------|---------|---------|----------|---------|---------|---------|---------|---------|---------|---------|-----------|-----------|-----------|-----------|-----------|---------|---------|----------|-------------------------|------|------|------|------|------|-------|------|------|------|------|------|------|------|------|------|------|------|------|------|-------|------|------|------|------|------|-----------------------|------|------|------|------|------|-------|-------|------|-------|-------|-------|------|-------|-------|-------|-------|-------|-------|-------|--------|-------|-------|-------|-------|-------|-------|------|------|-------|------|-------|------|-------|------|------|------|------|------|------|------|------|------|------|-------|-------|------|------|------|------|-------|------|----------|---|----|--|---|----|-------|----|----|----|----|---------|-----|----|---------|------|--|--|--|--|-------|-------|-------|-------|-----|--|-----------|-----|-----|--|-----|-----|--|--|------|-------|------|------|------|-----|------|------|------|-------|--|--|------|-----|-----|------|------|--|
| 1                                                                                                                                                                                                                                                                                                                                                                                                                                                                                                                                                                                                                                                                                                                                                                                                                                                                                                                                                                                                                                                                                                                                                                                                                                                                                                                                                                                                                                                                                                                                                                                                                                                                                                                                                                                                                                                                                                                                                                                                                                                                                                                                                                                                                                                                                                                                                                                                                                                                                                                 | 16.11  | 84.4    | 5      | 6/25             | K83k           | (R)A F I T N I P F D V k W Q S L k (D) | 1907.0425                       | 114.0511                   | 4.0                         | 77516.1/8.85       | HUMAN   | P52272      | 293675            | Heterogeneous nuclear ribonucleoprotein M OS=Homo sapiens GN=HNRNPM PE=1 SV=3 |                    |         |         |           |           |           |           |           |         |         |          |         |         |         |         |         |         |         |           |           |           |           |           |         |         |          |                         |      |      |      |      |      |       |      |      |      |      |      |      |      |      |      |      |      |      |      |       |      |      |      |      |      |                       |      |      |      |      |      |       |       |      |       |       |       |      |       |       |       |       |       |       |       |        |       |       |       |       |       |       |      |      |       |      |       |      |       |      |      |      |      |      |      |      |      |      |      |       |       |      |      |      |      |       |      |          |   |    |  |   |    |       |    |    |    |    |         |     |    |         |      |  |  |  |  |       |       |       |       |     |  |           |     |     |  |     |     |  |  |      |       |      |      |      |     |      |      |      |       |  |  |      |     |     |      |      |  |
| <table border="1"> <thead> <tr> <th>Fragment-ion (m/z)</th> <th>72.081</th> <th>86.097</th> <th>87.100</th> <th>120.081</th> <th>133.088</th> <th>191.119</th> <th>192.123</th> <th>200.144</th> <th>215.134</th> <th>216.098</th> <th>219.113</th> <th>228.135</th> <th>311.174</th> <th>329.182</th> <th>347.229</th> <th>414.269</th> <th>442.260</th> <th>499.899*3</th> <th>501.235*2</th> <th>681.361*2</th> <th>737.907*2</th> <th>845.460*2</th> <th>901.989</th> <th>902.495</th> <th>1361.720</th> </tr> </thead> <tbody> <tr> <td>Frac. Inten. (% of TIC)</td> <td>0.07</td> <td>0.51</td> <td>1.71</td> <td>0.28</td> <td>1.65</td> <td>11.04</td> <td>2.54</td> <td>1.72</td> <td>2.40</td> <td>4.74</td> <td>8.79</td> <td>1.74</td> <td>2.10</td> <td>4.21</td> <td>1.90</td> <td>2.37</td> <td>1.87</td> <td>1.93</td> <td>2.41</td> <td>18.12</td> <td>4.81</td> <td>5.29</td> <td>4.67</td> <td>5.40</td> <td>7.73</td> </tr> <tr> <td>Rel. Inten. (% of BP)</td> <td>0.40</td> <td>2.79</td> <td>9.43</td> <td>1.55</td> <td>9.10</td> <td>60.92</td> <td>14.02</td> <td>9.49</td> <td>13.23</td> <td>26.16</td> <td>48.49</td> <td>9.63</td> <td>11.60</td> <td>23.23</td> <td>10.50</td> <td>13.07</td> <td>10.33</td> <td>10.66</td> <td>13.33</td> <td>100.00</td> <td>26.55</td> <td>29.22</td> <td>25.75</td> <td>29.77</td> <td>42.67</td> </tr> <tr> <td>Score</td> <td>0.50</td> <td>0.22</td> <td>-0.09</td> <td>1.00</td> <td>-0.09</td> <td>0.50</td> <td>-0.14</td> <td>0.50</td> <td>0.75</td> <td>0.75</td> <td>0.50</td> <td>0.75</td> <td>0.50</td> <td>0.75</td> <td>1.50</td> <td>0.50</td> <td>0.75</td> <td>-0.11</td> <td>-0.13</td> <td>1.50</td> <td>1.50</td> <td>1.50</td> <td>1.50</td> <td>-0.30</td> <td>1.50</td> </tr> <tr> <td>Ion-type</td> <td>V</td> <td>LI</td> <td></td> <td>F</td> <td>a2</td> <td>NI-28</td> <td>IT</td> <td>QS</td> <td>b2</td> <td>NI</td> <td>QSL+H2O</td> <td>QSL</td> <td>y3</td> <td>ITNI-28</td> <td>ITNI</td> <td></td> <td></td> <td></td> <td></td> <td>y10*2</td> <td>y11*2</td> <td>y13*2</td> <td>y**14</td> <td>y10</td> <td></td> </tr> <tr> <td>Delta ppm</td> <td>4.5</td> <td>2.0</td> <td></td> <td>1.0</td> <td>0.1</td> <td></td> <td></td> <td>16.7</td> <td>-26.6</td> <td>-2.7</td> <td>-4.6</td> <td>-1.6</td> <td>3.9</td> <td>-3.2</td> <td>-0.9</td> <td>-7.7</td> <td>-16.5</td> <td></td> <td></td> <td>-5.1</td> <td>0.4</td> <td>9.5</td> <td>-5.2</td> <td>-0.8</td> <td></td> </tr> </tbody> </table> |        |         |        |                  |                |                                        |                                 |                            |                             |                    |         |             |                   |                                                                               | Fragment-ion (m/z) | 72.081  | 86.097  | 87.100    | 120.081   | 133.088   | 191.119   | 192.123   | 200.144 | 215.134 | 216.098  | 219.113 | 228.135 | 311.174 | 329.182 | 347.229 | 414.269 | 442.260 | 499.899*3 | 501.235*2 | 681.361*2 | 737.907*2 | 845.460*2 | 901.989 | 902.495 | 1361.720 | Frac. Inten. (% of TIC) | 0.07 | 0.51 | 1.71 | 0.28 | 1.65 | 11.04 | 2.54 | 1.72 | 2.40 | 4.74 | 8.79 | 1.74 | 2.10 | 4.21 | 1.90 | 2.37 | 1.87 | 1.93 | 2.41 | 18.12 | 4.81 | 5.29 | 4.67 | 5.40 | 7.73 | Rel. Inten. (% of BP) | 0.40 | 2.79 | 9.43 | 1.55 | 9.10 | 60.92 | 14.02 | 9.49 | 13.23 | 26.16 | 48.49 | 9.63 | 11.60 | 23.23 | 10.50 | 13.07 | 10.33 | 10.66 | 13.33 | 100.00 | 26.55 | 29.22 | 25.75 | 29.77 | 42.67 | Score | 0.50 | 0.22 | -0.09 | 1.00 | -0.09 | 0.50 | -0.14 | 0.50 | 0.75 | 0.75 | 0.50 | 0.75 | 0.50 | 0.75 | 1.50 | 0.50 | 0.75 | -0.11 | -0.13 | 1.50 | 1.50 | 1.50 | 1.50 | -0.30 | 1.50 | Ion-type | V | LI |  | F | a2 | NI-28 | IT | QS | b2 | NI | QSL+H2O | QSL | y3 | ITNI-28 | ITNI |  |  |  |  | y10*2 | y11*2 | y13*2 | y**14 | y10 |  | Delta ppm | 4.5 | 2.0 |  | 1.0 | 0.1 |  |  | 16.7 | -26.6 | -2.7 | -4.6 | -1.6 | 3.9 | -3.2 | -0.9 | -7.7 | -16.5 |  |  | -5.1 | 0.4 | 9.5 | -5.2 | -0.8 |  |
| Fragment-ion (m/z)                                                                                                                                                                                                                                                                                                                                                                                                                                                                                                                                                                                                                                                                                                                                                                                                                                                                                                                                                                                                                                                                                                                                                                                                                                                                                                                                                                                                                                                                                                                                                                                                                                                                                                                                                                                                                                                                                                                                                                                                                                                                                                                                                                                                                                                                                                                                                                                                                                                                                                | 72.081 | 86.097  | 87.100 | 120.081          | 133.088        | 191.119                                | 192.123                         | 200.144                    | 215.134                     | 216.098            | 219.113 | 228.135     | 311.174           | 329.182                                                                       | 347.229            | 414.269 | 442.260 | 499.899*3 | 501.235*2 | 681.361*2 | 737.907*2 | 845.460*2 | 901.989 | 902.495 | 1361.720 |         |         |         |         |         |         |         |           |           |           |           |           |         |         |          |                         |      |      |      |      |      |       |      |      |      |      |      |      |      |      |      |      |      |      |      |       |      |      |      |      |      |                       |      |      |      |      |      |       |       |      |       |       |       |      |       |       |       |       |       |       |       |        |       |       |       |       |       |       |      |      |       |      |       |      |       |      |      |      |      |      |      |      |      |      |      |       |       |      |      |      |      |       |      |          |   |    |  |   |    |       |    |    |    |    |         |     |    |         |      |  |  |  |  |       |       |       |       |     |  |           |     |     |  |     |     |  |  |      |       |      |      |      |     |      |      |      |       |  |  |      |     |     |      |      |  |
| Frac. Inten. (% of TIC)                                                                                                                                                                                                                                                                                                                                                                                                                                                                                                                                                                                                                                                                                                                                                                                                                                                                                                                                                                                                                                                                                                                                                                                                                                                                                                                                                                                                                                                                                                                                                                                                                                                                                                                                                                                                                                                                                                                                                                                                                                                                                                                                                                                                                                                                                                                                                                                                                                                                                           | 0.07   | 0.51    | 1.71   | 0.28             | 1.65           | 11.04                                  | 2.54                            | 1.72                       | 2.40                        | 4.74               | 8.79    | 1.74        | 2.10              | 4.21                                                                          | 1.90               | 2.37    | 1.87    | 1.93      | 2.41      | 18.12     | 4.81      | 5.29      | 4.67    | 5.40    | 7.73     |         |         |         |         |         |         |         |           |           |           |           |           |         |         |          |                         |      |      |      |      |      |       |      |      |      |      |      |      |      |      |      |      |      |      |      |       |      |      |      |      |      |                       |      |      |      |      |      |       |       |      |       |       |       |      |       |       |       |       |       |       |       |        |       |       |       |       |       |       |      |      |       |      |       |      |       |      |      |      |      |      |      |      |      |      |      |       |       |      |      |      |      |       |      |          |   |    |  |   |    |       |    |    |    |    |         |     |    |         |      |  |  |  |  |       |       |       |       |     |  |           |     |     |  |     |     |  |  |      |       |      |      |      |     |      |      |      |       |  |  |      |     |     |      |      |  |
| Rel. Inten. (% of BP)                                                                                                                                                                                                                                                                                                                                                                                                                                                                                                                                                                                                                                                                                                                                                                                                                                                                                                                                                                                                                                                                                                                                                                                                                                                                                                                                                                                                                                                                                                                                                                                                                                                                                                                                                                                                                                                                                                                                                                                                                                                                                                                                                                                                                                                                                                                                                                                                                                                                                             | 0.40   | 2.79    | 9.43   | 1.55             | 9.10           | 60.92                                  | 14.02                           | 9.49                       | 13.23                       | 26.16              | 48.49   | 9.63        | 11.60             | 23.23                                                                         | 10.50              | 13.07   | 10.33   | 10.66     | 13.33     | 100.00    | 26.55     | 29.22     | 25.75   | 29.77   | 42.67    |         |         |         |         |         |         |         |           |           |           |           |           |         |         |          |                         |      |      |      |      |      |       |      |      |      |      |      |      |      |      |      |      |      |      |      |       |      |      |      |      |      |                       |      |      |      |      |      |       |       |      |       |       |       |      |       |       |       |       |       |       |       |        |       |       |       |       |       |       |      |      |       |      |       |      |       |      |      |      |      |      |      |      |      |      |      |       |       |      |      |      |      |       |      |          |   |    |  |   |    |       |    |    |    |    |         |     |    |         |      |  |  |  |  |       |       |       |       |     |  |           |     |     |  |     |     |  |  |      |       |      |      |      |     |      |      |      |       |  |  |      |     |     |      |      |  |
| Score                                                                                                                                                                                                                                                                                                                                                                                                                                                                                                                                                                                                                                                                                                                                                                                                                                                                                                                                                                                                                                                                                                                                                                                                                                                                                                                                                                                                                                                                                                                                                                                                                                                                                                                                                                                                                                                                                                                                                                                                                                                                                                                                                                                                                                                                                                                                                                                                                                                                                                             | 0.50   | 0.22    | -0.09  | 1.00             | -0.09          | 0.50                                   | -0.14                           | 0.50                       | 0.75                        | 0.75               | 0.50    | 0.75        | 0.50              | 0.75                                                                          | 1.50               | 0.50    | 0.75    | -0.11     | -0.13     | 1.50      | 1.50      | 1.50      | 1.50    | -0.30   | 1.50     |         |         |         |         |         |         |         |           |           |           |           |           |         |         |          |                         |      |      |      |      |      |       |      |      |      |      |      |      |      |      |      |      |      |      |      |       |      |      |      |      |      |                       |      |      |      |      |      |       |       |      |       |       |       |      |       |       |       |       |       |       |       |        |       |       |       |       |       |       |      |      |       |      |       |      |       |      |      |      |      |      |      |      |      |      |      |       |       |      |      |      |      |       |      |          |   |    |  |   |    |       |    |    |    |    |         |     |    |         |      |  |  |  |  |       |       |       |       |     |  |           |     |     |  |     |     |  |  |      |       |      |      |      |     |      |      |      |       |  |  |      |     |     |      |      |  |
| Ion-type                                                                                                                                                                                                                                                                                                                                                                                                                                                                                                                                                                                                                                                                                                                                                                                                                                                                                                                                                                                                                                                                                                                                                                                                                                                                                                                                                                                                                                                                                                                                                                                                                                                                                                                                                                                                                                                                                                                                                                                                                                                                                                                                                                                                                                                                                                                                                                                                                                                                                                          | V      | LI      |        | F                | a2             | NI-28                                  | IT                              | QS                         | b2                          | NI                 | QSL+H2O | QSL         | y3                | ITNI-28                                                                       | ITNI               |         |         |           |           | y10*2     | y11*2     | y13*2     | y**14   | y10     |          |         |         |         |         |         |         |         |           |           |           |           |           |         |         |          |                         |      |      |      |      |      |       |      |      |      |      |      |      |      |      |      |      |      |      |      |       |      |      |      |      |      |                       |      |      |      |      |      |       |       |      |       |       |       |      |       |       |       |       |       |       |       |        |       |       |       |       |       |       |      |      |       |      |       |      |       |      |      |      |      |      |      |      |      |      |      |       |       |      |      |      |      |       |      |          |   |    |  |   |    |       |    |    |    |    |         |     |    |         |      |  |  |  |  |       |       |       |       |     |  |           |     |     |  |     |     |  |  |      |       |      |      |      |     |      |      |      |       |  |  |      |     |     |      |      |  |
| Delta ppm                                                                                                                                                                                                                                                                                                                                                                                                                                                                                                                                                                                                                                                                                                                                                                                                                                                                                                                                                                                                                                                                                                                                                                                                                                                                                                                                                                                                                                                                                                                                                                                                                                                                                                                                                                                                                                                                                                                                                                                                                                                                                                                                                                                                                                                                                                                                                                                                                                                                                                         | 4.5    | 2.0     |        | 1.0              | 0.1            |                                        |                                 | 16.7                       | -26.6                       | -2.7               | -4.6    | -1.6        | 3.9               | -3.2                                                                          | -0.9               | -7.7    | -16.5   |           |           | -5.1      | 0.4       | 9.5       | -5.2    | -0.8    |          |         |         |         |         |         |         |         |           |           |           |           |           |         |         |          |                         |      |      |      |      |      |       |      |      |      |      |      |      |      |      |      |      |      |      |      |       |      |      |      |      |      |                       |      |      |      |      |      |       |       |      |       |       |       |      |       |       |       |       |       |       |       |        |       |       |       |       |       |       |      |      |       |      |       |      |       |      |      |      |      |      |      |      |      |      |      |       |       |      |      |      |      |       |      |          |   |    |  |   |    |       |    |    |    |    |         |     |    |         |      |  |  |  |  |       |       |       |       |     |  |           |     |     |  |     |     |  |  |      |       |      |      |      |     |      |      |      |       |  |  |      |     |     |      |      |  |

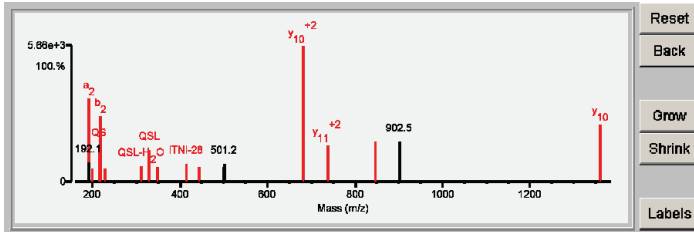

Result Summary

| Rank | Score | SPI (%) | BCS | # Unmatched Ions | Variable sites | Sequence                    | MH <sup>+</sup> Calculated (Da) | MH <sup>+</sup> Error (Da) | MH <sup>+</sup> Error (ppm) | Protein MW/pI (Da) | Species | Accession # | Protein Name                                                                  |
|------|-------|---------|-----|------------------|----------------|-----------------------------|---------------------------------|----------------------------|-----------------------------|--------------------|---------|-------------|-------------------------------------------------------------------------------|
| 1    | 16.90 | 82.5    | 9   | 6/25             | K463k          | (K)EKPYFPIPEYTFIQNVPLEDR(V) | 2724.3556                       | 114.0686                   | 9.0                         | 90513.8/5.76       | HUMAN   | Q00839      | Heterogeneous nuclear ribonucleoprotein U OS=Homo sapiens GN=HNRNPU PE=1 SV=5 |

Detailed Results

| Rank                                                                                                                                                                                                                                                                                                                                                                                                                                                                                                                                                                                                                                                                                                                                                                                                                                                                                                                                                                                                                                                                                                                                                                                                                                                                                                                                                                                                                                                                                                                                                                                                                                                                                                                                                                                                                                                                                                                                                                                                                                                                                                                                                                                                                                                                                                                                                                                                                                                                             | Score  | SPI (%) | BCS     | # Unmatched Ions | Variable sites | Sequence                    | MH <sup>+</sup> Calculated (Da) | MH <sup>+</sup> Error (Da) | MH <sup>+</sup> Error (ppm) | Protein MW/pI (Da) | Species | Accession # | MS-Digest Index # | Protein Name                                                                  |                       |         |                       |                       |                       |         |         |         |          |          |                        |         |         |         |         |                       |         |                       |                       |                       |         |         |         |          |          |                        |                         |      |      |      |      |      |      |      |      |      |      |      |      |       |      |      |      |      |      |      |      |       |      |      |      |      |                       |      |      |      |       |      |       |      |      |       |       |       |       |        |       |       |       |       |       |       |       |       |       |       |       |       |       |      |      |      |      |       |       |      |      |       |      |       |       |      |      |      |       |      |      |      |      |      |      |      |       |       |          |    |    |   |    |  |  |    |        |  |      |  |        |    |    |                   |    |                   |                       |                   |        |    |    |    |  |  |           |      |      |       |     |  |  |      |       |  |      |  |      |     |       |      |      |      |     |      |      |      |     |      |  |  |
|----------------------------------------------------------------------------------------------------------------------------------------------------------------------------------------------------------------------------------------------------------------------------------------------------------------------------------------------------------------------------------------------------------------------------------------------------------------------------------------------------------------------------------------------------------------------------------------------------------------------------------------------------------------------------------------------------------------------------------------------------------------------------------------------------------------------------------------------------------------------------------------------------------------------------------------------------------------------------------------------------------------------------------------------------------------------------------------------------------------------------------------------------------------------------------------------------------------------------------------------------------------------------------------------------------------------------------------------------------------------------------------------------------------------------------------------------------------------------------------------------------------------------------------------------------------------------------------------------------------------------------------------------------------------------------------------------------------------------------------------------------------------------------------------------------------------------------------------------------------------------------------------------------------------------------------------------------------------------------------------------------------------------------------------------------------------------------------------------------------------------------------------------------------------------------------------------------------------------------------------------------------------------------------------------------------------------------------------------------------------------------------------------------------------------------------------------------------------------------|--------|---------|---------|------------------|----------------|-----------------------------|---------------------------------|----------------------------|-----------------------------|--------------------|---------|-------------|-------------------|-------------------------------------------------------------------------------|-----------------------|---------|-----------------------|-----------------------|-----------------------|---------|---------|---------|----------|----------|------------------------|---------|---------|---------|---------|-----------------------|---------|-----------------------|-----------------------|-----------------------|---------|---------|---------|----------|----------|------------------------|-------------------------|------|------|------|------|------|------|------|------|------|------|------|------|-------|------|------|------|------|------|------|------|-------|------|------|------|------|-----------------------|------|------|------|-------|------|-------|------|------|-------|-------|-------|-------|--------|-------|-------|-------|-------|-------|-------|-------|-------|-------|-------|-------|-------|-------|------|------|------|------|-------|-------|------|------|-------|------|-------|-------|------|------|------|-------|------|------|------|------|------|------|------|-------|-------|----------|----|----|---|----|--|--|----|--------|--|------|--|--------|----|----|-------------------|----|-------------------|-----------------------|-------------------|--------|----|----|----|--|--|-----------|------|------|-------|-----|--|--|------|-------|--|------|--|------|-----|-------|------|------|------|-----|------|------|------|-----|------|--|--|
| 1                                                                                                                                                                                                                                                                                                                                                                                                                                                                                                                                                                                                                                                                                                                                                                                                                                                                                                                                                                                                                                                                                                                                                                                                                                                                                                                                                                                                                                                                                                                                                                                                                                                                                                                                                                                                                                                                                                                                                                                                                                                                                                                                                                                                                                                                                                                                                                                                                                                                                | 16.90  | 82.5    | 9       | 6/25             | K463k          | (K)EKPYFPIPEYTFIQNVPLEDR(V) | 2724.3556                       | 114.0686                   | 9.0                         | 90513.8/5.76       | HUMAN   | Q00839      | 293689            | Heterogeneous nuclear ribonucleoprotein U OS=Homo sapiens GN=HNRNPU PE=1 SV=5 |                       |         |                       |                       |                       |         |         |         |          |          |                        |         |         |         |         |                       |         |                       |                       |                       |         |         |         |          |          |                        |                         |      |      |      |      |      |      |      |      |      |      |      |      |       |      |      |      |      |      |      |      |       |      |      |      |      |                       |      |      |      |       |      |       |      |      |       |       |       |       |        |       |       |       |       |       |       |       |       |       |       |       |       |       |      |      |      |      |       |       |      |      |       |      |       |       |      |      |      |       |      |      |      |      |      |      |      |       |       |          |    |    |   |    |  |  |    |        |  |      |  |        |    |    |                   |    |                   |                       |                   |        |    |    |    |  |  |           |      |      |       |     |  |  |      |       |  |      |  |      |     |       |      |      |      |     |      |      |      |     |      |  |  |
| <table border="1"> <thead> <tr> <th>Fragment-ion (m/z)</th> <th>70.065</th><th>86.096</th><th>120.079</th><th>175.120</th><th>243.155</th><th>258.149</th><th>290.145</th><th>354.171</th><th>407.215</th><th>437.240</th><th>602.254</th><th>618.344</th><th>629.326</th><th>728.384</th><th>754.369<sup>+2</sup></th><th>842.434</th><th>878.452<sup>+2</sup></th><th>916.943<sup>+2</sup></th><th>925.468<sup>+2</sup></th><th>953.491</th><th>970.487</th><th>989.517</th><th>1083.602</th><th>1094.593</th><th>1106.054<sup>+2</sup></th> </tr> </thead> <tbody> <tr> <td>Frac. Inten. (% of TIC)</td> <td>0.00</td><td>0.07</td><td>0.14</td><td>4.24</td><td>2.17</td><td>2.32</td><td>2.03</td><td>2.20</td><td>3.37</td><td>2.45</td><td>2.31</td><td>3.02</td><td>22.49</td><td>4.09</td><td>2.35</td><td>3.35</td><td>3.07</td><td>2.43</td><td>7.86</td><td>4.32</td><td>10.98</td><td>4.52</td><td>2.91</td><td>3.37</td><td>3.91</td> </tr> <tr> <td>Rel. Inten. (% of BP)</td> <td>0.02</td><td>0.30</td><td>0.64</td><td>18.87</td><td>9.64</td><td>10.34</td><td>9.03</td><td>9.79</td><td>14.99</td><td>10.90</td><td>10.28</td><td>13.44</td><td>100.00</td><td>18.20</td><td>10.44</td><td>14.90</td><td>13.67</td><td>10.79</td><td>34.96</td><td>19.22</td><td>48.82</td><td>20.10</td><td>12.96</td><td>15.00</td><td>17.38</td> </tr> <tr> <td>Score</td> <td>0.20</td><td>0.22</td><td>1.00</td><td>1.50</td><td>-0.10</td><td>-0.10</td><td>1.50</td><td>0.25</td><td>-0.15</td><td>0.75</td><td>-0.10</td><td>13.44</td><td>1.50</td><td>1.50</td><td>0.50</td><td>14.90</td><td>0.50</td><td>0.50</td><td>1.50</td><td>0.50</td><td>1.50</td><td>0.50</td><td>1.50</td><td>-0.15</td><td>-0.17</td> </tr> <tr> <td>Ion-type</td> <td>PR</td><td>LI</td><td>F</td><td>y1</td><td></td><td></td><td>y2</td><td>b2-H2O</td><td></td><td>PIPE</td><td></td><td>YFFPIP</td><td>y5</td><td>y6</td><td>b11<sup>+2</sup></td><td>y7</td><td>b13<sup>+2</sup></td><td>y15-NH3<sup>+2</sup></td><td>y15<sup>+2</sup></td><td>y8-NH3</td><td>y6</td><td>by</td><td>y9</td><td></td><td></td> </tr> <tr> <td>Delta ppm</td> <td>-3.2</td><td>-9.6</td><td>-19.0</td><td>4.3</td><td></td><td></td><td>-2.1</td><td>-19.7</td><td></td><td>-1.0</td><td></td><td>23.0</td><td>1.6</td><td>-13.9</td><td>13.0</td><td>-3.6</td><td>39.5</td><td>4.3</td><td>17.3</td><td>23.0</td><td>-8.2</td><td>7.0</td><td>20.8</td><td></td><td></td> </tr> </tbody> </table> |        |         |         |                  |                |                             |                                 |                            |                             |                    |         |             |                   |                                                                               | Fragment-ion (m/z)    | 70.065  | 86.096                | 120.079               | 175.120               | 243.155 | 258.149 | 290.145 | 354.171  | 407.215  | 437.240                | 602.254 | 618.344 | 629.326 | 728.384 | 754.369 <sup>+2</sup> | 842.434 | 878.452 <sup>+2</sup> | 916.943 <sup>+2</sup> | 925.468 <sup>+2</sup> | 953.491 | 970.487 | 989.517 | 1083.602 | 1094.593 | 1106.054 <sup>+2</sup> | Frac. Inten. (% of TIC) | 0.00 | 0.07 | 0.14 | 4.24 | 2.17 | 2.32 | 2.03 | 2.20 | 3.37 | 2.45 | 2.31 | 3.02 | 22.49 | 4.09 | 2.35 | 3.35 | 3.07 | 2.43 | 7.86 | 4.32 | 10.98 | 4.52 | 2.91 | 3.37 | 3.91 | Rel. Inten. (% of BP) | 0.02 | 0.30 | 0.64 | 18.87 | 9.64 | 10.34 | 9.03 | 9.79 | 14.99 | 10.90 | 10.28 | 13.44 | 100.00 | 18.20 | 10.44 | 14.90 | 13.67 | 10.79 | 34.96 | 19.22 | 48.82 | 20.10 | 12.96 | 15.00 | 17.38 | Score | 0.20 | 0.22 | 1.00 | 1.50 | -0.10 | -0.10 | 1.50 | 0.25 | -0.15 | 0.75 | -0.10 | 13.44 | 1.50 | 1.50 | 0.50 | 14.90 | 0.50 | 0.50 | 1.50 | 0.50 | 1.50 | 0.50 | 1.50 | -0.15 | -0.17 | Ion-type | PR | LI | F | y1 |  |  | y2 | b2-H2O |  | PIPE |  | YFFPIP | y5 | y6 | b11 <sup>+2</sup> | y7 | b13 <sup>+2</sup> | y15-NH3 <sup>+2</sup> | y15 <sup>+2</sup> | y8-NH3 | y6 | by | y9 |  |  | Delta ppm | -3.2 | -9.6 | -19.0 | 4.3 |  |  | -2.1 | -19.7 |  | -1.0 |  | 23.0 | 1.6 | -13.9 | 13.0 | -3.6 | 39.5 | 4.3 | 17.3 | 23.0 | -8.2 | 7.0 | 20.8 |  |  |
| Fragment-ion (m/z)                                                                                                                                                                                                                                                                                                                                                                                                                                                                                                                                                                                                                                                                                                                                                                                                                                                                                                                                                                                                                                                                                                                                                                                                                                                                                                                                                                                                                                                                                                                                                                                                                                                                                                                                                                                                                                                                                                                                                                                                                                                                                                                                                                                                                                                                                                                                                                                                                                                               | 70.065 | 86.096  | 120.079 | 175.120          | 243.155        | 258.149                     | 290.145                         | 354.171                    | 407.215                     | 437.240            | 602.254 | 618.344     | 629.326           | 728.384                                                                       | 754.369 <sup>+2</sup> | 842.434 | 878.452 <sup>+2</sup> | 916.943 <sup>+2</sup> | 925.468 <sup>+2</sup> | 953.491 | 970.487 | 989.517 | 1083.602 | 1094.593 | 1106.054 <sup>+2</sup> |         |         |         |         |                       |         |                       |                       |                       |         |         |         |          |          |                        |                         |      |      |      |      |      |      |      |      |      |      |      |      |       |      |      |      |      |      |      |      |       |      |      |      |      |                       |      |      |      |       |      |       |      |      |       |       |       |       |        |       |       |       |       |       |       |       |       |       |       |       |       |       |      |      |      |      |       |       |      |      |       |      |       |       |      |      |      |       |      |      |      |      |      |      |      |       |       |          |    |    |   |    |  |  |    |        |  |      |  |        |    |    |                   |    |                   |                       |                   |        |    |    |    |  |  |           |      |      |       |     |  |  |      |       |  |      |  |      |     |       |      |      |      |     |      |      |      |     |      |  |  |
| Frac. Inten. (% of TIC)                                                                                                                                                                                                                                                                                                                                                                                                                                                                                                                                                                                                                                                                                                                                                                                                                                                                                                                                                                                                                                                                                                                                                                                                                                                                                                                                                                                                                                                                                                                                                                                                                                                                                                                                                                                                                                                                                                                                                                                                                                                                                                                                                                                                                                                                                                                                                                                                                                                          | 0.00   | 0.07    | 0.14    | 4.24             | 2.17           | 2.32                        | 2.03                            | 2.20                       | 3.37                        | 2.45               | 2.31    | 3.02        | 22.49             | 4.09                                                                          | 2.35                  | 3.35    | 3.07                  | 2.43                  | 7.86                  | 4.32    | 10.98   | 4.52    | 2.91     | 3.37     | 3.91                   |         |         |         |         |                       |         |                       |                       |                       |         |         |         |          |          |                        |                         |      |      |      |      |      |      |      |      |      |      |      |      |       |      |      |      |      |      |      |      |       |      |      |      |      |                       |      |      |      |       |      |       |      |      |       |       |       |       |        |       |       |       |       |       |       |       |       |       |       |       |       |       |      |      |      |      |       |       |      |      |       |      |       |       |      |      |      |       |      |      |      |      |      |      |      |       |       |          |    |    |   |    |  |  |    |        |  |      |  |        |    |    |                   |    |                   |                       |                   |        |    |    |    |  |  |           |      |      |       |     |  |  |      |       |  |      |  |      |     |       |      |      |      |     |      |      |      |     |      |  |  |
| Rel. Inten. (% of BP)                                                                                                                                                                                                                                                                                                                                                                                                                                                                                                                                                                                                                                                                                                                                                                                                                                                                                                                                                                                                                                                                                                                                                                                                                                                                                                                                                                                                                                                                                                                                                                                                                                                                                                                                                                                                                                                                                                                                                                                                                                                                                                                                                                                                                                                                                                                                                                                                                                                            | 0.02   | 0.30    | 0.64    | 18.87            | 9.64           | 10.34                       | 9.03                            | 9.79                       | 14.99                       | 10.90              | 10.28   | 13.44       | 100.00            | 18.20                                                                         | 10.44                 | 14.90   | 13.67                 | 10.79                 | 34.96                 | 19.22   | 48.82   | 20.10   | 12.96    | 15.00    | 17.38                  |         |         |         |         |                       |         |                       |                       |                       |         |         |         |          |          |                        |                         |      |      |      |      |      |      |      |      |      |      |      |      |       |      |      |      |      |      |      |      |       |      |      |      |      |                       |      |      |      |       |      |       |      |      |       |       |       |       |        |       |       |       |       |       |       |       |       |       |       |       |       |       |      |      |      |      |       |       |      |      |       |      |       |       |      |      |      |       |      |      |      |      |      |      |      |       |       |          |    |    |   |    |  |  |    |        |  |      |  |        |    |    |                   |    |                   |                       |                   |        |    |    |    |  |  |           |      |      |       |     |  |  |      |       |  |      |  |      |     |       |      |      |      |     |      |      |      |     |      |  |  |
| Score                                                                                                                                                                                                                                                                                                                                                                                                                                                                                                                                                                                                                                                                                                                                                                                                                                                                                                                                                                                                                                                                                                                                                                                                                                                                                                                                                                                                                                                                                                                                                                                                                                                                                                                                                                                                                                                                                                                                                                                                                                                                                                                                                                                                                                                                                                                                                                                                                                                                            | 0.20   | 0.22    | 1.00    | 1.50             | -0.10          | -0.10                       | 1.50                            | 0.25                       | -0.15                       | 0.75               | -0.10   | 13.44       | 1.50              | 1.50                                                                          | 0.50                  | 14.90   | 0.50                  | 0.50                  | 1.50                  | 0.50    | 1.50    | 0.50    | 1.50     | -0.15    | -0.17                  |         |         |         |         |                       |         |                       |                       |                       |         |         |         |          |          |                        |                         |      |      |      |      |      |      |      |      |      |      |      |      |       |      |      |      |      |      |      |      |       |      |      |      |      |                       |      |      |      |       |      |       |      |      |       |       |       |       |        |       |       |       |       |       |       |       |       |       |       |       |       |       |      |      |      |      |       |       |      |      |       |      |       |       |      |      |      |       |      |      |      |      |      |      |      |       |       |          |    |    |   |    |  |  |    |        |  |      |  |        |    |    |                   |    |                   |                       |                   |        |    |    |    |  |  |           |      |      |       |     |  |  |      |       |  |      |  |      |     |       |      |      |      |     |      |      |      |     |      |  |  |
| Ion-type                                                                                                                                                                                                                                                                                                                                                                                                                                                                                                                                                                                                                                                                                                                                                                                                                                                                                                                                                                                                                                                                                                                                                                                                                                                                                                                                                                                                                                                                                                                                                                                                                                                                                                                                                                                                                                                                                                                                                                                                                                                                                                                                                                                                                                                                                                                                                                                                                                                                         | PR     | LI      | F       | y1               |                |                             | y2                              | b2-H2O                     |                             | PIPE               |         | YFFPIP      | y5                | y6                                                                            | b11 <sup>+2</sup>     | y7      | b13 <sup>+2</sup>     | y15-NH3 <sup>+2</sup> | y15 <sup>+2</sup>     | y8-NH3  | y6      | by      | y9       |          |                        |         |         |         |         |                       |         |                       |                       |                       |         |         |         |          |          |                        |                         |      |      |      |      |      |      |      |      |      |      |      |      |       |      |      |      |      |      |      |      |       |      |      |      |      |                       |      |      |      |       |      |       |      |      |       |       |       |       |        |       |       |       |       |       |       |       |       |       |       |       |       |       |      |      |      |      |       |       |      |      |       |      |       |       |      |      |      |       |      |      |      |      |      |      |      |       |       |          |    |    |   |    |  |  |    |        |  |      |  |        |    |    |                   |    |                   |                       |                   |        |    |    |    |  |  |           |      |      |       |     |  |  |      |       |  |      |  |      |     |       |      |      |      |     |      |      |      |     |      |  |  |
| Delta ppm                                                                                                                                                                                                                                                                                                                                                                                                                                                                                                                                                                                                                                                                                                                                                                                                                                                                                                                                                                                                                                                                                                                                                                                                                                                                                                                                                                                                                                                                                                                                                                                                                                                                                                                                                                                                                                                                                                                                                                                                                                                                                                                                                                                                                                                                                                                                                                                                                                                                        | -3.2   | -9.6    | -19.0   | 4.3              |                |                             | -2.1                            | -19.7                      |                             | -1.0               |         | 23.0        | 1.6               | -13.9                                                                         | 13.0                  | -3.6    | 39.5                  | 4.3                   | 17.3                  | 23.0    | -8.2    | 7.0     | 20.8     |          |                        |         |         |         |         |                       |         |                       |                       |                       |         |         |         |          |          |                        |                         |      |      |      |      |      |      |      |      |      |      |      |      |       |      |      |      |      |      |      |      |       |      |      |      |      |                       |      |      |      |       |      |       |      |      |       |       |       |       |        |       |       |       |       |       |       |       |       |       |       |       |       |       |      |      |      |      |       |       |      |      |       |      |       |       |      |      |      |       |      |      |      |      |      |      |      |       |       |          |    |    |   |    |  |  |    |        |  |      |  |        |    |    |                   |    |                   |                       |                   |        |    |    |    |  |  |           |      |      |       |     |  |  |      |       |  |      |  |      |     |       |      |      |      |     |      |      |      |     |      |  |  |

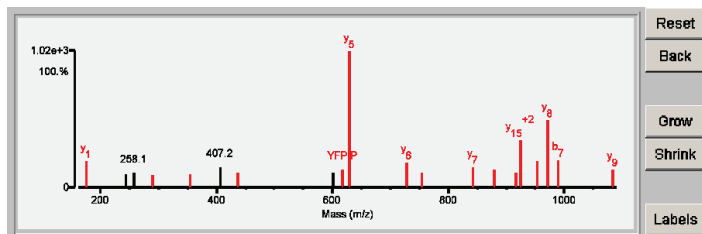

Result Summary

| Rank | Score | SPI (%) | BCS | # Unmatched Ions | Variable sites | Sequence                                | MH <sup>+</sup> Calculated (Da) | MH <sup>+</sup> Error (Da) | MH <sup>+</sup> Error (ppm) | Protein MW/pt (Da) | Species | Accession # | Protein Name                                                                  |
|------|-------|---------|-----|------------------|----------------|-----------------------------------------|---------------------------------|----------------------------|-----------------------------|--------------------|---------|-------------|-------------------------------------------------------------------------------|
| 1    | 16.46 | 86.3    | 10  | 4/25             | K523k          | (K)HAAENPGKYNI <del>L</del> GTNTIMDK(M) | 2187.0863                       | 114.0643                   | 9.3                         | 90513.8/5.76       | HUMAN   | Q00839      | Heterogeneous nuclear ribonucleoprotein U OS=Homo sapiens GN=HNRNPU PE=1 SV=5 |

Detailed Results

| Rank                                                                                                                                                                                                                                                                                                                                                                                                                                                                                                                                                                                                                                                                                                                                                                                                                                                                                                                                                                                                                                                                                                                                                                                                                                                                                                                                                                                                                                                                                                                                                                                                                                                                                                                                                                                                                                                                                                                                                                                                                                                                                                                                                                                                                                                                                                                                                                                                                                                                                                                                                               | Score  | SPI (%)          | BCS    | # Unmatched Ions | Variable sites | Sequence                                | MH <sup>+</sup> Calculated (Da) | MH <sup>+</sup> Error (Da) | MH <sup>+</sup> Error (ppm) | Protein MW/pt (Da) | Species | Accession # | MS-Digest Index # | Protein Name                                                                  |                    |         |                                                |                   |         |         |         |         |                     |         |         |         |         |         |         |         |         |                       |         |         |         |         |         |         |         |         |                        |      |      |      |      |      |      |      |      |      |      |      |      |      |      |       |      |      |      |      |      |      |      |      |      |       |                      |      |       |      |      |      |      |      |       |       |       |       |       |       |       |        |       |       |       |       |       |       |       |       |       |       |       |      |      |      |      |      |      |      |      |      |      |      |      |      |       |      |       |      |      |      |      |       |      |       |      |      |          |    |                  |    |    |    |    |   |    |    |    |    |    |    |  |    |  |                                                |                   |       |    |  |    |                     |    |           |      |      |      |      |       |      |     |       |      |       |      |     |     |  |      |  |      |      |     |      |  |      |     |      |
|--------------------------------------------------------------------------------------------------------------------------------------------------------------------------------------------------------------------------------------------------------------------------------------------------------------------------------------------------------------------------------------------------------------------------------------------------------------------------------------------------------------------------------------------------------------------------------------------------------------------------------------------------------------------------------------------------------------------------------------------------------------------------------------------------------------------------------------------------------------------------------------------------------------------------------------------------------------------------------------------------------------------------------------------------------------------------------------------------------------------------------------------------------------------------------------------------------------------------------------------------------------------------------------------------------------------------------------------------------------------------------------------------------------------------------------------------------------------------------------------------------------------------------------------------------------------------------------------------------------------------------------------------------------------------------------------------------------------------------------------------------------------------------------------------------------------------------------------------------------------------------------------------------------------------------------------------------------------------------------------------------------------------------------------------------------------------------------------------------------------------------------------------------------------------------------------------------------------------------------------------------------------------------------------------------------------------------------------------------------------------------------------------------------------------------------------------------------------------------------------------------------------------------------------------------------------|--------|------------------|--------|------------------|----------------|-----------------------------------------|---------------------------------|----------------------------|-----------------------------|--------------------|---------|-------------|-------------------|-------------------------------------------------------------------------------|--------------------|---------|------------------------------------------------|-------------------|---------|---------|---------|---------|---------------------|---------|---------|---------|---------|---------|---------|---------|---------|-----------------------|---------|---------|---------|---------|---------|---------|---------|---------|------------------------|------|------|------|------|------|------|------|------|------|------|------|------|------|------|-------|------|------|------|------|------|------|------|------|------|-------|----------------------|------|-------|------|------|------|------|------|-------|-------|-------|-------|-------|-------|-------|--------|-------|-------|-------|-------|-------|-------|-------|-------|-------|-------|-------|------|------|------|------|------|------|------|------|------|------|------|------|------|-------|------|-------|------|------|------|------|-------|------|-------|------|------|----------|----|------------------|----|----|----|----|---|----|----|----|----|----|----|--|----|--|------------------------------------------------|-------------------|-------|----|--|----|---------------------|----|-----------|------|------|------|------|-------|------|-----|-------|------|-------|------|-----|-----|--|------|--|------|------|-----|------|--|------|-----|------|
| 1                                                                                                                                                                                                                                                                                                                                                                                                                                                                                                                                                                                                                                                                                                                                                                                                                                                                                                                                                                                                                                                                                                                                                                                                                                                                                                                                                                                                                                                                                                                                                                                                                                                                                                                                                                                                                                                                                                                                                                                                                                                                                                                                                                                                                                                                                                                                                                                                                                                                                                                                                                  | 16.46  | 86.3             | 10     | 4/25             | K523k          | (K)HAAENPGKYNI <del>L</del> GTNTIMDK(M) | 2187.0863                       | 114.0643                   | 9.3                         | 90513.8/5.76       | HUMAN   | Q00839      | 293689            | Heterogeneous nuclear ribonucleoprotein U OS=Homo sapiens GN=HNRNPU PE=1 SV=5 |                    |         |                                                |                   |         |         |         |         |                     |         |         |         |         |         |         |         |         |                       |         |         |         |         |         |         |         |         |                        |      |      |      |      |      |      |      |      |      |      |      |      |      |      |       |      |      |      |      |      |      |      |      |      |       |                      |      |       |      |      |      |      |      |       |       |       |       |       |       |       |        |       |       |       |       |       |       |       |       |       |       |       |      |      |      |      |      |      |      |      |      |      |      |      |      |       |      |       |      |      |      |      |       |      |       |      |      |          |    |                  |    |    |    |    |   |    |    |    |    |    |    |  |    |  |                                                |                   |       |    |  |    |                     |    |           |      |      |      |      |       |      |     |       |      |       |      |     |     |  |      |  |      |      |     |      |  |      |     |      |
| <table border="1"> <thead> <tr> <th>Fragment-ion (m/z)</th> <th>70.065</th> <th>74.060</th> <th>84.080</th> <th>86.096</th> <th>87.054</th> <th>110.072</th> <th>136.076</th> <th>147.111</th> <th>209.104</th> <th>262.135</th> <th>278.114</th> <th>393.184</th> <th>409.186</th> <th>494.259</th> <th>523.225</th> <th>599.287</th> <th>646.824<sup>+2</sup></th> <th>655.328</th> <th>674.327</th> <th>677.308</th> <th>694.325</th> <th>721.363</th> <th>787.403</th> <th>861.414</th> <th>879.433</th> </tr> </thead> <tbody> <tr> <td>Frac. Inten.(% of TIC)</td> <td>0.01</td> <td>3.21</td> <td>0.52</td> <td>1.22</td> <td>0.15</td> <td>0.27</td> <td>0.15</td> <td>3.76</td> <td>9.60</td> <td>4.78</td> <td>2.94</td> <td>8.07</td> <td>3.99</td> <td>4.13</td> <td>13.19</td> <td>3.69</td> <td>2.98</td> <td>6.02</td> <td>3.37</td> <td>3.46</td> <td>3.05</td> <td>2.90</td> <td>2.86</td> <td>4.50</td> <td>11.19</td> </tr> <tr> <td>Rel. Inten.(% of BP)</td> <td>0.05</td> <td>24.36</td> <td>3.92</td> <td>9.24</td> <td>1.14</td> <td>2.06</td> <td>1.12</td> <td>28.48</td> <td>72.79</td> <td>36.26</td> <td>22.28</td> <td>61.23</td> <td>30.25</td> <td>31.31</td> <td>100.00</td> <td>27.98</td> <td>22.56</td> <td>45.68</td> <td>25.57</td> <td>26.23</td> <td>23.16</td> <td>21.98</td> <td>21.67</td> <td>34.11</td> <td>84.89</td> </tr> <tr> <td>Score</td> <td>0.20</td> <td>1.50</td> <td>0.50</td> <td>0.22</td> <td>0.33</td> <td>1.00</td> <td>1.00</td> <td>1.50</td> <td>0.50</td> <td>1.50</td> <td>0.75</td> <td>1.50</td> <td>0.50</td> <td>-0.31</td> <td>0.50</td> <td>-0.28</td> <td>0.25</td> <td>0.50</td> <td>0.75</td> <td>0.50</td> <td>-0.23</td> <td>1.50</td> <td>-0.22</td> <td>0.50</td> <td>1.50</td> </tr> <tr> <td>Ion-type</td> <td>PR</td> <td>y<sup>++1</sup></td> <td>KQ</td> <td>LI</td> <td>NR</td> <td>a1</td> <td>Y</td> <td>y1</td> <td>b2</td> <td>y2</td> <td>YN</td> <td>y3</td> <td>b4</td> <td></td> <td>b5</td> <td></td> <td>b<sub>11</sub>-NH<sub>3</sub><sup>+2</sup></td> <td>b<sup>++11</sup></td> <td>PGKYN</td> <td>b7</td> <td></td> <td>y6</td> <td>y6-H<sub>2</sub>O</td> <td>y6</td> </tr> <tr> <td>Delta ppm</td> <td>-1.8</td> <td>-5.9</td> <td>-5.7</td> <td>-9.6</td> <td>-14.8</td> <td>-7.9</td> <td>1.5</td> <td>-12.9</td> <td>-0.5</td> <td>-17.3</td> <td>-1.9</td> <td>9.6</td> <td>5.6</td> <td></td> <td>-3.1</td> <td></td> <td>28.8</td> <td>14.7</td> <td>0.4</td> <td>10.4</td> <td></td> <td>11.8</td> <td>0.0</td> <td>10.5</td> </tr> </tbody> </table> |        |                  |        |                  |                |                                         |                                 |                            |                             |                    |         |             |                   |                                                                               | Fragment-ion (m/z) | 70.065  | 74.060                                         | 84.080            | 86.096  | 87.054  | 110.072 | 136.076 | 147.111             | 209.104 | 262.135 | 278.114 | 393.184 | 409.186 | 494.259 | 523.225 | 599.287 | 646.824 <sup>+2</sup> | 655.328 | 674.327 | 677.308 | 694.325 | 721.363 | 787.403 | 861.414 | 879.433 | Frac. Inten.(% of TIC) | 0.01 | 3.21 | 0.52 | 1.22 | 0.15 | 0.27 | 0.15 | 3.76 | 9.60 | 4.78 | 2.94 | 8.07 | 3.99 | 4.13 | 13.19 | 3.69 | 2.98 | 6.02 | 3.37 | 3.46 | 3.05 | 2.90 | 2.86 | 4.50 | 11.19 | Rel. Inten.(% of BP) | 0.05 | 24.36 | 3.92 | 9.24 | 1.14 | 2.06 | 1.12 | 28.48 | 72.79 | 36.26 | 22.28 | 61.23 | 30.25 | 31.31 | 100.00 | 27.98 | 22.56 | 45.68 | 25.57 | 26.23 | 23.16 | 21.98 | 21.67 | 34.11 | 84.89 | Score | 0.20 | 1.50 | 0.50 | 0.22 | 0.33 | 1.00 | 1.00 | 1.50 | 0.50 | 1.50 | 0.75 | 1.50 | 0.50 | -0.31 | 0.50 | -0.28 | 0.25 | 0.50 | 0.75 | 0.50 | -0.23 | 1.50 | -0.22 | 0.50 | 1.50 | Ion-type | PR | y <sup>++1</sup> | KQ | LI | NR | a1 | Y | y1 | b2 | y2 | YN | y3 | b4 |  | b5 |  | b <sub>11</sub> -NH <sub>3</sub> <sup>+2</sup> | b <sup>++11</sup> | PGKYN | b7 |  | y6 | y6-H <sub>2</sub> O | y6 | Delta ppm | -1.8 | -5.9 | -5.7 | -9.6 | -14.8 | -7.9 | 1.5 | -12.9 | -0.5 | -17.3 | -1.9 | 9.6 | 5.6 |  | -3.1 |  | 28.8 | 14.7 | 0.4 | 10.4 |  | 11.8 | 0.0 | 10.5 |
| Fragment-ion (m/z)                                                                                                                                                                                                                                                                                                                                                                                                                                                                                                                                                                                                                                                                                                                                                                                                                                                                                                                                                                                                                                                                                                                                                                                                                                                                                                                                                                                                                                                                                                                                                                                                                                                                                                                                                                                                                                                                                                                                                                                                                                                                                                                                                                                                                                                                                                                                                                                                                                                                                                                                                 | 70.065 | 74.060           | 84.080 | 86.096           | 87.054         | 110.072                                 | 136.076                         | 147.111                    | 209.104                     | 262.135            | 278.114 | 393.184     | 409.186           | 494.259                                                                       | 523.225            | 599.287 | 646.824 <sup>+2</sup>                          | 655.328           | 674.327 | 677.308 | 694.325 | 721.363 | 787.403             | 861.414 | 879.433 |         |         |         |         |         |         |                       |         |         |         |         |         |         |         |         |                        |      |      |      |      |      |      |      |      |      |      |      |      |      |      |       |      |      |      |      |      |      |      |      |      |       |                      |      |       |      |      |      |      |      |       |       |       |       |       |       |       |        |       |       |       |       |       |       |       |       |       |       |       |      |      |      |      |      |      |      |      |      |      |      |      |      |       |      |       |      |      |      |      |       |      |       |      |      |          |    |                  |    |    |    |    |   |    |    |    |    |    |    |  |    |  |                                                |                   |       |    |  |    |                     |    |           |      |      |      |      |       |      |     |       |      |       |      |     |     |  |      |  |      |      |     |      |  |      |     |      |
| Frac. Inten.(% of TIC)                                                                                                                                                                                                                                                                                                                                                                                                                                                                                                                                                                                                                                                                                                                                                                                                                                                                                                                                                                                                                                                                                                                                                                                                                                                                                                                                                                                                                                                                                                                                                                                                                                                                                                                                                                                                                                                                                                                                                                                                                                                                                                                                                                                                                                                                                                                                                                                                                                                                                                                                             | 0.01   | 3.21             | 0.52   | 1.22             | 0.15           | 0.27                                    | 0.15                            | 3.76                       | 9.60                        | 4.78               | 2.94    | 8.07        | 3.99              | 4.13                                                                          | 13.19              | 3.69    | 2.98                                           | 6.02              | 3.37    | 3.46    | 3.05    | 2.90    | 2.86                | 4.50    | 11.19   |         |         |         |         |         |         |                       |         |         |         |         |         |         |         |         |                        |      |      |      |      |      |      |      |      |      |      |      |      |      |      |       |      |      |      |      |      |      |      |      |      |       |                      |      |       |      |      |      |      |      |       |       |       |       |       |       |       |        |       |       |       |       |       |       |       |       |       |       |       |      |      |      |      |      |      |      |      |      |      |      |      |      |       |      |       |      |      |      |      |       |      |       |      |      |          |    |                  |    |    |    |    |   |    |    |    |    |    |    |  |    |  |                                                |                   |       |    |  |    |                     |    |           |      |      |      |      |       |      |     |       |      |       |      |     |     |  |      |  |      |      |     |      |  |      |     |      |
| Rel. Inten.(% of BP)                                                                                                                                                                                                                                                                                                                                                                                                                                                                                                                                                                                                                                                                                                                                                                                                                                                                                                                                                                                                                                                                                                                                                                                                                                                                                                                                                                                                                                                                                                                                                                                                                                                                                                                                                                                                                                                                                                                                                                                                                                                                                                                                                                                                                                                                                                                                                                                                                                                                                                                                               | 0.05   | 24.36            | 3.92   | 9.24             | 1.14           | 2.06                                    | 1.12                            | 28.48                      | 72.79                       | 36.26              | 22.28   | 61.23       | 30.25             | 31.31                                                                         | 100.00             | 27.98   | 22.56                                          | 45.68             | 25.57   | 26.23   | 23.16   | 21.98   | 21.67               | 34.11   | 84.89   |         |         |         |         |         |         |                       |         |         |         |         |         |         |         |         |                        |      |      |      |      |      |      |      |      |      |      |      |      |      |      |       |      |      |      |      |      |      |      |      |      |       |                      |      |       |      |      |      |      |      |       |       |       |       |       |       |       |        |       |       |       |       |       |       |       |       |       |       |       |      |      |      |      |      |      |      |      |      |      |      |      |      |       |      |       |      |      |      |      |       |      |       |      |      |          |    |                  |    |    |    |    |   |    |    |    |    |    |    |  |    |  |                                                |                   |       |    |  |    |                     |    |           |      |      |      |      |       |      |     |       |      |       |      |     |     |  |      |  |      |      |     |      |  |      |     |      |
| Score                                                                                                                                                                                                                                                                                                                                                                                                                                                                                                                                                                                                                                                                                                                                                                                                                                                                                                                                                                                                                                                                                                                                                                                                                                                                                                                                                                                                                                                                                                                                                                                                                                                                                                                                                                                                                                                                                                                                                                                                                                                                                                                                                                                                                                                                                                                                                                                                                                                                                                                                                              | 0.20   | 1.50             | 0.50   | 0.22             | 0.33           | 1.00                                    | 1.00                            | 1.50                       | 0.50                        | 1.50               | 0.75    | 1.50        | 0.50              | -0.31                                                                         | 0.50               | -0.28   | 0.25                                           | 0.50              | 0.75    | 0.50    | -0.23   | 1.50    | -0.22               | 0.50    | 1.50    |         |         |         |         |         |         |                       |         |         |         |         |         |         |         |         |                        |      |      |      |      |      |      |      |      |      |      |      |      |      |      |       |      |      |      |      |      |      |      |      |      |       |                      |      |       |      |      |      |      |      |       |       |       |       |       |       |       |        |       |       |       |       |       |       |       |       |       |       |       |      |      |      |      |      |      |      |      |      |      |      |      |      |       |      |       |      |      |      |      |       |      |       |      |      |          |    |                  |    |    |    |    |   |    |    |    |    |    |    |  |    |  |                                                |                   |       |    |  |    |                     |    |           |      |      |      |      |       |      |     |       |      |       |      |     |     |  |      |  |      |      |     |      |  |      |     |      |
| Ion-type                                                                                                                                                                                                                                                                                                                                                                                                                                                                                                                                                                                                                                                                                                                                                                                                                                                                                                                                                                                                                                                                                                                                                                                                                                                                                                                                                                                                                                                                                                                                                                                                                                                                                                                                                                                                                                                                                                                                                                                                                                                                                                                                                                                                                                                                                                                                                                                                                                                                                                                                                           | PR     | y <sup>++1</sup> | KQ     | LI               | NR             | a1                                      | Y                               | y1                         | b2                          | y2                 | YN      | y3          | b4                |                                                                               | b5                 |         | b <sub>11</sub> -NH <sub>3</sub> <sup>+2</sup> | b <sup>++11</sup> | PGKYN   | b7      |         | y6      | y6-H <sub>2</sub> O | y6      |         |         |         |         |         |         |         |                       |         |         |         |         |         |         |         |         |                        |      |      |      |      |      |      |      |      |      |      |      |      |      |      |       |      |      |      |      |      |      |      |      |      |       |                      |      |       |      |      |      |      |      |       |       |       |       |       |       |       |        |       |       |       |       |       |       |       |       |       |       |       |      |      |      |      |      |      |      |      |      |      |      |      |      |       |      |       |      |      |      |      |       |      |       |      |      |          |    |                  |    |    |    |    |   |    |    |    |    |    |    |  |    |  |                                                |                   |       |    |  |    |                     |    |           |      |      |      |      |       |      |     |       |      |       |      |     |     |  |      |  |      |      |     |      |  |      |     |      |
| Delta ppm                                                                                                                                                                                                                                                                                                                                                                                                                                                                                                                                                                                                                                                                                                                                                                                                                                                                                                                                                                                                                                                                                                                                                                                                                                                                                                                                                                                                                                                                                                                                                                                                                                                                                                                                                                                                                                                                                                                                                                                                                                                                                                                                                                                                                                                                                                                                                                                                                                                                                                                                                          | -1.8   | -5.9             | -5.7   | -9.6             | -14.8          | -7.9                                    | 1.5                             | -12.9                      | -0.5                        | -17.3              | -1.9    | 9.6         | 5.6               |                                                                               | -3.1               |         | 28.8                                           | 14.7              | 0.4     | 10.4    |         | 11.8    | 0.0                 | 10.5    |         |         |         |         |         |         |         |                       |         |         |         |         |         |         |         |         |                        |      |      |      |      |      |      |      |      |      |      |      |      |      |      |       |      |      |      |      |      |      |      |      |      |       |                      |      |       |      |      |      |      |      |       |       |       |       |       |       |       |        |       |       |       |       |       |       |       |       |       |       |       |      |      |      |      |      |      |      |      |      |      |      |      |      |       |      |       |      |      |      |      |       |      |       |      |      |          |    |                  |    |    |    |    |   |    |    |    |    |    |    |  |    |  |                                                |                   |       |    |  |    |                     |    |           |      |      |      |      |       |      |     |       |      |       |      |     |     |  |      |  |      |      |     |      |  |      |     |      |

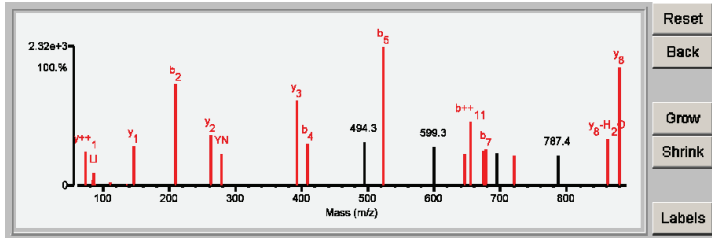

Result Summary

| Rank | Score | SPI (%) | BCS | # Unmatched Ions | Variable sites | Sequence              | MH <sup>+</sup> Calculated (Da) | MH <sup>+</sup> Error (Da) | MH <sup>+</sup> Error (ppm) | Protein MW/pI (Da) | Species | Accession # | Protein Name                                                                          |
|------|-------|---------|-----|------------------|----------------|-----------------------|---------------------------------|----------------------------|-----------------------------|--------------------|---------|-------------|---------------------------------------------------------------------------------------|
| 1    | 19.51 | 85.0    | 9   | 4/25             | K46k           | (R)NYYEQWGLTDCVVMR(D) | 2061.9521                       | 114.0559                   | 5.9                         | 37429.9/8.97       | HUMAN   | P22626      | Heterogeneous nuclear ribonucleoproteins A2/B1 OS=Homo sapiens GN=HNRNPA2B1 PE=1 SV=2 |

Detailed Results

| Rank                                                                                                                                                                                                                                                                                                                                                                                                                                                                                                                                                                                                                                                                                                                                                                                                                                                                                                                                                                                                                                                                                                                                                                                                                                                                                                                                                                                                                                                                                                                                                                                                                                                                                                                                                                                                                                                                                                                                                                                                                                                                                                                                                                                                                                                                                                                                                                                                                                                                                                     | Score  | SPI (%) | BCS    | # Unmatched Ions | Variable sites | Sequence              | MH <sup>+</sup> Calculated (Da) | MH <sup>+</sup> Error (Da) | MH <sup>+</sup> Error (ppm) | Protein MW/pI (Da) | Species | Accession #           | MS-Digest Index # | Protein Name                                                                          |                       |         |         |                       |                       |         |                       |         |                       |         |                        |         |                       |         |         |                       |         |         |                       |                       |         |                       |         |                       |         |                        |                        |      |      |      |      |      |      |      |       |      |      |      |      |      |      |      |      |      |      |      |      |      |      |      |      |      |                      |      |      |      |      |      |       |       |        |       |       |       |       |       |       |       |       |       |       |       |       |       |       |       |       |       |       |      |      |      |      |      |      |      |      |      |      |      |       |      |      |      |      |      |      |      |      |      |       |       |      |       |          |   |    |    |     |   |       |    |    |    |    |    |  |    |     |                   |    |    |                       |                   |    |                   |  |  |    |  |           |       |       |       |      |       |      |      |      |       |       |      |  |      |     |      |      |      |     |       |     |      |  |  |      |  |
|----------------------------------------------------------------------------------------------------------------------------------------------------------------------------------------------------------------------------------------------------------------------------------------------------------------------------------------------------------------------------------------------------------------------------------------------------------------------------------------------------------------------------------------------------------------------------------------------------------------------------------------------------------------------------------------------------------------------------------------------------------------------------------------------------------------------------------------------------------------------------------------------------------------------------------------------------------------------------------------------------------------------------------------------------------------------------------------------------------------------------------------------------------------------------------------------------------------------------------------------------------------------------------------------------------------------------------------------------------------------------------------------------------------------------------------------------------------------------------------------------------------------------------------------------------------------------------------------------------------------------------------------------------------------------------------------------------------------------------------------------------------------------------------------------------------------------------------------------------------------------------------------------------------------------------------------------------------------------------------------------------------------------------------------------------------------------------------------------------------------------------------------------------------------------------------------------------------------------------------------------------------------------------------------------------------------------------------------------------------------------------------------------------------------------------------------------------------------------------------------------------|--------|---------|--------|------------------|----------------|-----------------------|---------------------------------|----------------------------|-----------------------------|--------------------|---------|-----------------------|-------------------|---------------------------------------------------------------------------------------|-----------------------|---------|---------|-----------------------|-----------------------|---------|-----------------------|---------|-----------------------|---------|------------------------|---------|-----------------------|---------|---------|-----------------------|---------|---------|-----------------------|-----------------------|---------|-----------------------|---------|-----------------------|---------|------------------------|------------------------|------|------|------|------|------|------|------|-------|------|------|------|------|------|------|------|------|------|------|------|------|------|------|------|------|------|----------------------|------|------|------|------|------|-------|-------|--------|-------|-------|-------|-------|-------|-------|-------|-------|-------|-------|-------|-------|-------|-------|-------|-------|-------|-------|------|------|------|------|------|------|------|------|------|------|------|-------|------|------|------|------|------|------|------|------|------|-------|-------|------|-------|----------|---|----|----|-----|---|-------|----|----|----|----|----|--|----|-----|-------------------|----|----|-----------------------|-------------------|----|-------------------|--|--|----|--|-----------|-------|-------|-------|------|-------|------|------|------|-------|-------|------|--|------|-----|------|------|------|-----|-------|-----|------|--|--|------|--|
| 1                                                                                                                                                                                                                                                                                                                                                                                                                                                                                                                                                                                                                                                                                                                                                                                                                                                                                                                                                                                                                                                                                                                                                                                                                                                                                                                                                                                                                                                                                                                                                                                                                                                                                                                                                                                                                                                                                                                                                                                                                                                                                                                                                                                                                                                                                                                                                                                                                                                                                                        | 19.51  | 85.0    | 9      | 4/25             | K46k           | (R)NYYEQWGLTDCVVMR(D) | 2061.9521                       | 114.0559                   | 5.9                         | 37429.9/8.97       | HUMAN   | P22626                | 645677            | Heterogeneous nuclear ribonucleoproteins A2/B1 OS=Homo sapiens GN=HNRNPA2B1 PE=1 SV=2 |                       |         |         |                       |                       |         |                       |         |                       |         |                        |         |                       |         |         |                       |         |         |                       |                       |         |                       |         |                       |         |                        |                        |      |      |      |      |      |      |      |       |      |      |      |      |      |      |      |      |      |      |      |      |      |      |      |      |      |                      |      |      |      |      |      |       |       |        |       |       |       |       |       |       |       |       |       |       |       |       |       |       |       |       |       |       |      |      |      |      |      |      |      |      |      |      |      |       |      |      |      |      |      |      |      |      |      |       |       |      |       |          |   |    |    |     |   |       |    |    |    |    |    |  |    |     |                   |    |    |                       |                   |    |                   |  |  |    |  |           |       |       |       |      |       |      |      |      |       |       |      |  |      |     |      |      |      |     |       |     |      |  |  |      |  |
| <table border="1"> <thead> <tr> <th>Fragment-ion (m/z)</th> <th>84.042</th><th>84.079</th><th>86.095</th><th>129.105</th><th>136.074</th><th>167.144</th><th>215.138</th><th>250.118</th><th>278.111</th><th>293.110</th><th>306.158</th><th>385.154<sup>+2</sup></th><th>405.224</th><th>421.176</th><th>646.825<sup>+2</sup></th><th>664.321</th><th>779.347</th><th>795.382<sup>+2</sup></th><th>868.393<sup>+2</sup></th><th>880.406</th><th>949.963<sup>+2</sup></th><th>958.492</th><th>980.021<sup>+2</sup></th><th>993.498</th><th>1036.479<sup>+2</sup></th> </tr> </thead> <tbody> <tr> <td>Frac. Inten.(% of TIC)</td> <td>0.10</td><td>0.27</td><td>0.25</td><td>0.10</td><td>0.27</td><td>5.72</td><td>3.70</td><td>12.89</td><td>3.73</td><td>3.24</td><td>3.74</td><td>4.33</td><td>4.30</td><td>5.48</td><td>3.40</td><td>5.13</td><td>4.01</td><td>5.90</td><td>5.17</td><td>6.81</td><td>7.81</td><td>4.20</td><td>3.12</td><td>3.05</td><td>3.31</td> </tr> <tr> <td>Rel. Inten.(% of BP)</td> <td>0.77</td><td>2.08</td><td>1.92</td><td>0.77</td><td>2.10</td><td>44.36</td><td>28.72</td><td>100.00</td><td>28.93</td><td>25.11</td><td>28.98</td><td>33.57</td><td>33.36</td><td>42.51</td><td>26.39</td><td>39.82</td><td>31.09</td><td>45.75</td><td>40.11</td><td>52.81</td><td>60.62</td><td>32.59</td><td>24.22</td><td>23.64</td><td>25.71</td> </tr> <tr> <td>Score</td> <td>1.00</td><td>0.50</td><td>0.22</td><td>0.20</td><td>1.00</td><td>0.50</td><td>0.75</td><td>0.50</td><td>0.75</td><td>1.50</td><td>1.50</td><td>-0.34</td><td>1.50</td><td>0.75</td><td>1.50</td><td>1.50</td><td>1.50</td><td>0.50</td><td>1.50</td><td>1.50</td><td>1.50</td><td>-0.33</td><td>-0.24</td><td>1.50</td><td>-0.26</td> </tr> <tr> <td>Ion-type</td> <td>E</td><td>KQ</td><td>LI</td><td>RKQ</td><td>Y</td><td>LT-28</td><td>LT</td><td>a2</td><td>b2</td><td>YE</td><td>y2</td><td></td><td>y3</td><td>YEQ</td><td>y10<sup>+2</sup></td><td>y5</td><td>y6</td><td>y12-NH3<sup>+2</sup></td><td>y13<sup>+2</sup></td><td>y7</td><td>y14<sup>+2</sup></td><td></td><td></td><td>y8</td><td></td> </tr> <tr> <td>Delta ppm</td> <td>-30.8</td><td>-27.1</td><td>-21.2</td><td>18.3</td><td>-14.6</td><td>-3.7</td><td>-7.5</td><td>-5.3</td><td>-14.5</td><td>-13.3</td><td>-3.7</td><td></td><td>-9.3</td><td>7.9</td><td>-2.3</td><td>-9.7</td><td>-8.7</td><td>0.3</td><td>-26.8</td><td>5.0</td><td>15.9</td><td></td><td></td><td>12.6</td><td></td> </tr> </tbody> </table> |        |         |        |                  |                |                       |                                 |                            |                             |                    |         |                       |                   |                                                                                       | Fragment-ion (m/z)    | 84.042  | 84.079  | 86.095                | 129.105               | 136.074 | 167.144               | 215.138 | 250.118               | 278.111 | 293.110                | 306.158 | 385.154 <sup>+2</sup> | 405.224 | 421.176 | 646.825 <sup>+2</sup> | 664.321 | 779.347 | 795.382 <sup>+2</sup> | 868.393 <sup>+2</sup> | 880.406 | 949.963 <sup>+2</sup> | 958.492 | 980.021 <sup>+2</sup> | 993.498 | 1036.479 <sup>+2</sup> | Frac. Inten.(% of TIC) | 0.10 | 0.27 | 0.25 | 0.10 | 0.27 | 5.72 | 3.70 | 12.89 | 3.73 | 3.24 | 3.74 | 4.33 | 4.30 | 5.48 | 3.40 | 5.13 | 4.01 | 5.90 | 5.17 | 6.81 | 7.81 | 4.20 | 3.12 | 3.05 | 3.31 | Rel. Inten.(% of BP) | 0.77 | 2.08 | 1.92 | 0.77 | 2.10 | 44.36 | 28.72 | 100.00 | 28.93 | 25.11 | 28.98 | 33.57 | 33.36 | 42.51 | 26.39 | 39.82 | 31.09 | 45.75 | 40.11 | 52.81 | 60.62 | 32.59 | 24.22 | 23.64 | 25.71 | Score | 1.00 | 0.50 | 0.22 | 0.20 | 1.00 | 0.50 | 0.75 | 0.50 | 0.75 | 1.50 | 1.50 | -0.34 | 1.50 | 0.75 | 1.50 | 1.50 | 1.50 | 0.50 | 1.50 | 1.50 | 1.50 | -0.33 | -0.24 | 1.50 | -0.26 | Ion-type | E | KQ | LI | RKQ | Y | LT-28 | LT | a2 | b2 | YE | y2 |  | y3 | YEQ | y10 <sup>+2</sup> | y5 | y6 | y12-NH3 <sup>+2</sup> | y13 <sup>+2</sup> | y7 | y14 <sup>+2</sup> |  |  | y8 |  | Delta ppm | -30.8 | -27.1 | -21.2 | 18.3 | -14.6 | -3.7 | -7.5 | -5.3 | -14.5 | -13.3 | -3.7 |  | -9.3 | 7.9 | -2.3 | -9.7 | -8.7 | 0.3 | -26.8 | 5.0 | 15.9 |  |  | 12.6 |  |
| Fragment-ion (m/z)                                                                                                                                                                                                                                                                                                                                                                                                                                                                                                                                                                                                                                                                                                                                                                                                                                                                                                                                                                                                                                                                                                                                                                                                                                                                                                                                                                                                                                                                                                                                                                                                                                                                                                                                                                                                                                                                                                                                                                                                                                                                                                                                                                                                                                                                                                                                                                                                                                                                                       | 84.042 | 84.079  | 86.095 | 129.105          | 136.074        | 167.144               | 215.138                         | 250.118                    | 278.111                     | 293.110            | 306.158 | 385.154 <sup>+2</sup> | 405.224           | 421.176                                                                               | 646.825 <sup>+2</sup> | 664.321 | 779.347 | 795.382 <sup>+2</sup> | 868.393 <sup>+2</sup> | 880.406 | 949.963 <sup>+2</sup> | 958.492 | 980.021 <sup>+2</sup> | 993.498 | 1036.479 <sup>+2</sup> |         |                       |         |         |                       |         |         |                       |                       |         |                       |         |                       |         |                        |                        |      |      |      |      |      |      |      |       |      |      |      |      |      |      |      |      |      |      |      |      |      |      |      |      |      |                      |      |      |      |      |      |       |       |        |       |       |       |       |       |       |       |       |       |       |       |       |       |       |       |       |       |       |      |      |      |      |      |      |      |      |      |      |      |       |      |      |      |      |      |      |      |      |      |       |       |      |       |          |   |    |    |     |   |       |    |    |    |    |    |  |    |     |                   |    |    |                       |                   |    |                   |  |  |    |  |           |       |       |       |      |       |      |      |      |       |       |      |  |      |     |      |      |      |     |       |     |      |  |  |      |  |
| Frac. Inten.(% of TIC)                                                                                                                                                                                                                                                                                                                                                                                                                                                                                                                                                                                                                                                                                                                                                                                                                                                                                                                                                                                                                                                                                                                                                                                                                                                                                                                                                                                                                                                                                                                                                                                                                                                                                                                                                                                                                                                                                                                                                                                                                                                                                                                                                                                                                                                                                                                                                                                                                                                                                   | 0.10   | 0.27    | 0.25   | 0.10             | 0.27           | 5.72                  | 3.70                            | 12.89                      | 3.73                        | 3.24               | 3.74    | 4.33                  | 4.30              | 5.48                                                                                  | 3.40                  | 5.13    | 4.01    | 5.90                  | 5.17                  | 6.81    | 7.81                  | 4.20    | 3.12                  | 3.05    | 3.31                   |         |                       |         |         |                       |         |         |                       |                       |         |                       |         |                       |         |                        |                        |      |      |      |      |      |      |      |       |      |      |      |      |      |      |      |      |      |      |      |      |      |      |      |      |      |                      |      |      |      |      |      |       |       |        |       |       |       |       |       |       |       |       |       |       |       |       |       |       |       |       |       |       |      |      |      |      |      |      |      |      |      |      |      |       |      |      |      |      |      |      |      |      |      |       |       |      |       |          |   |    |    |     |   |       |    |    |    |    |    |  |    |     |                   |    |    |                       |                   |    |                   |  |  |    |  |           |       |       |       |      |       |      |      |      |       |       |      |  |      |     |      |      |      |     |       |     |      |  |  |      |  |
| Rel. Inten.(% of BP)                                                                                                                                                                                                                                                                                                                                                                                                                                                                                                                                                                                                                                                                                                                                                                                                                                                                                                                                                                                                                                                                                                                                                                                                                                                                                                                                                                                                                                                                                                                                                                                                                                                                                                                                                                                                                                                                                                                                                                                                                                                                                                                                                                                                                                                                                                                                                                                                                                                                                     | 0.77   | 2.08    | 1.92   | 0.77             | 2.10           | 44.36                 | 28.72                           | 100.00                     | 28.93                       | 25.11              | 28.98   | 33.57                 | 33.36             | 42.51                                                                                 | 26.39                 | 39.82   | 31.09   | 45.75                 | 40.11                 | 52.81   | 60.62                 | 32.59   | 24.22                 | 23.64   | 25.71                  |         |                       |         |         |                       |         |         |                       |                       |         |                       |         |                       |         |                        |                        |      |      |      |      |      |      |      |       |      |      |      |      |      |      |      |      |      |      |      |      |      |      |      |      |      |                      |      |      |      |      |      |       |       |        |       |       |       |       |       |       |       |       |       |       |       |       |       |       |       |       |       |       |      |      |      |      |      |      |      |      |      |      |      |       |      |      |      |      |      |      |      |      |      |       |       |      |       |          |   |    |    |     |   |       |    |    |    |    |    |  |    |     |                   |    |    |                       |                   |    |                   |  |  |    |  |           |       |       |       |      |       |      |      |      |       |       |      |  |      |     |      |      |      |     |       |     |      |  |  |      |  |
| Score                                                                                                                                                                                                                                                                                                                                                                                                                                                                                                                                                                                                                                                                                                                                                                                                                                                                                                                                                                                                                                                                                                                                                                                                                                                                                                                                                                                                                                                                                                                                                                                                                                                                                                                                                                                                                                                                                                                                                                                                                                                                                                                                                                                                                                                                                                                                                                                                                                                                                                    | 1.00   | 0.50    | 0.22   | 0.20             | 1.00           | 0.50                  | 0.75                            | 0.50                       | 0.75                        | 1.50               | 1.50    | -0.34                 | 1.50              | 0.75                                                                                  | 1.50                  | 1.50    | 1.50    | 0.50                  | 1.50                  | 1.50    | 1.50                  | -0.33   | -0.24                 | 1.50    | -0.26                  |         |                       |         |         |                       |         |         |                       |                       |         |                       |         |                       |         |                        |                        |      |      |      |      |      |      |      |       |      |      |      |      |      |      |      |      |      |      |      |      |      |      |      |      |      |                      |      |      |      |      |      |       |       |        |       |       |       |       |       |       |       |       |       |       |       |       |       |       |       |       |       |       |      |      |      |      |      |      |      |      |      |      |      |       |      |      |      |      |      |      |      |      |      |       |       |      |       |          |   |    |    |     |   |       |    |    |    |    |    |  |    |     |                   |    |    |                       |                   |    |                   |  |  |    |  |           |       |       |       |      |       |      |      |      |       |       |      |  |      |     |      |      |      |     |       |     |      |  |  |      |  |
| Ion-type                                                                                                                                                                                                                                                                                                                                                                                                                                                                                                                                                                                                                                                                                                                                                                                                                                                                                                                                                                                                                                                                                                                                                                                                                                                                                                                                                                                                                                                                                                                                                                                                                                                                                                                                                                                                                                                                                                                                                                                                                                                                                                                                                                                                                                                                                                                                                                                                                                                                                                 | E      | KQ      | LI     | RKQ              | Y              | LT-28                 | LT                              | a2                         | b2                          | YE                 | y2      |                       | y3                | YEQ                                                                                   | y10 <sup>+2</sup>     | y5      | y6      | y12-NH3 <sup>+2</sup> | y13 <sup>+2</sup>     | y7      | y14 <sup>+2</sup>     |         |                       | y8      |                        |         |                       |         |         |                       |         |         |                       |                       |         |                       |         |                       |         |                        |                        |      |      |      |      |      |      |      |       |      |      |      |      |      |      |      |      |      |      |      |      |      |      |      |      |      |                      |      |      |      |      |      |       |       |        |       |       |       |       |       |       |       |       |       |       |       |       |       |       |       |       |       |       |      |      |      |      |      |      |      |      |      |      |      |       |      |      |      |      |      |      |      |      |      |       |       |      |       |          |   |    |    |     |   |       |    |    |    |    |    |  |    |     |                   |    |    |                       |                   |    |                   |  |  |    |  |           |       |       |       |      |       |      |      |      |       |       |      |  |      |     |      |      |      |     |       |     |      |  |  |      |  |
| Delta ppm                                                                                                                                                                                                                                                                                                                                                                                                                                                                                                                                                                                                                                                                                                                                                                                                                                                                                                                                                                                                                                                                                                                                                                                                                                                                                                                                                                                                                                                                                                                                                                                                                                                                                                                                                                                                                                                                                                                                                                                                                                                                                                                                                                                                                                                                                                                                                                                                                                                                                                | -30.8  | -27.1   | -21.2  | 18.3             | -14.6          | -3.7                  | -7.5                            | -5.3                       | -14.5                       | -13.3              | -3.7    |                       | -9.3              | 7.9                                                                                   | -2.3                  | -9.7    | -8.7    | 0.3                   | -26.8                 | 5.0     | 15.9                  |         |                       | 12.6    |                        |         |                       |         |         |                       |         |         |                       |                       |         |                       |         |                       |         |                        |                        |      |      |      |      |      |      |      |       |      |      |      |      |      |      |      |      |      |      |      |      |      |      |      |      |      |                      |      |      |      |      |      |       |       |        |       |       |       |       |       |       |       |       |       |       |       |       |       |       |       |       |       |       |      |      |      |      |      |      |      |      |      |      |      |       |      |      |      |      |      |      |      |      |      |       |       |      |       |          |   |    |    |     |   |       |    |    |    |    |    |  |    |     |                   |    |    |                       |                   |    |                   |  |  |    |  |           |       |       |       |      |       |      |      |      |       |       |      |  |      |     |      |      |      |     |       |     |      |  |  |      |  |

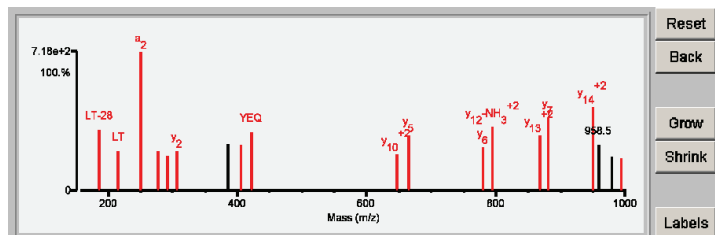

Result Summary

| Rank | Score | SPI (%) | BCS | # Unmatched Ions | Variable sites | Sequence           | MH <sup>+</sup> Calculated (Da) | MH <sup>+</sup> Error (Da) | MH <sup>+</sup> Error (ppm) | Protein MW/pI (Da) | Species | Accession # | Protein Name                                                                                 |
|------|-------|---------|-----|------------------|----------------|--------------------|---------------------------------|----------------------------|-----------------------------|--------------------|---------|-------------|----------------------------------------------------------------------------------------------|
| 1    | 14.01 | 75.2    | 6   | 7/25             | K15k           | (K)FLVEYkSAVEK(K)  | 1312.7147                       | 114.0516                   | 6.1                         | 49512.9/5.52       | HUMAN   | O14929      | Histone acetyltransferase type B catalytic subunit OS=Homo sapiens GN=HAT1 PE=1 SV=1         |
| 2    | 10.39 | 55.5    | 5   | 10/25            | K20k           | (K)FLVEYKSAVEK(K)  | 1312.7147                       | 114.0516                   | 6.1                         | 49512.9/5.52       | HUMAN   | O14929      | Histone acetyltransferase type B catalytic subunit OS=Homo sapiens GN=HAT1 PE=1 SV=1         |
| 3    | 7.45  | 61.1    | 2   | 10/25            | K405k          | (K)EVASKYEVLFK(E)  | 1312.7147                       | 114.0516                   | 6.1                         | 49512.9/5.51       | HUMAN   | RO14929     | REVERSE Histone acetyltransferase type B catalytic subunit OS=Homo sapiens GN=HAT1 PE=1 SV=1 |
| 4    | 6.91  | 59.0    | 1   | 10/25            | None           | (K)TMNLGFKVELFK(L) | 1426.7763                       | -0.0099                    | -7.0                        | 83756.1/8.41       | HUMAN   | RQ72388     | REVERSE Protein dpy-19 homolog 4 OS=Homo sapiens GN=DPY19L4 PE=2 SV=1                        |
| 5    | 6.37  | 56.3    | 3   | 13/25            | None           | (R)LSQLFEK(F)      | 951.5146                        | -0.0012                    | -1.3                        | 23718.4/6.18       | HUMAN   | RP05231     | REVERSE Interleukin-6 OS=Homo sapiens GN=IL6 PE=1 SV=1                                       |

Detailed Results

| Rank | Score | SPI (%) | BCS | # Unmatched Ions | Variable sites | Sequence                      | MH <sup>+</sup> Calculated (Da) | MH <sup>+</sup> Error (Da) | MH <sup>+</sup> Error (ppm) | Protein MW/pI (Da) | Species | Accession # | MS-Digest Index # | Protein Name                                                                         |
|------|-------|---------|-----|------------------|----------------|-------------------------------|---------------------------------|----------------------------|-----------------------------|--------------------|---------|-------------|-------------------|--------------------------------------------------------------------------------------|
| 1    | 14.01 | 75.2    | 6   | 7/25             | K15k           | (K) F L V E Y K S A V E K (K) | 1312.7147                       | 114.0516                   | 6.1                         | 49512.9/5.52       | HUMAN   | O14929      | 273751            | Histone acetyltransferase type B catalytic subunit OS=Homo sapiens GN=HAT1 PE=1 SV=1 |

  

| Fragment-ion (m/z)     | 60.041 | 72.080 | 84.079 | 85.083 | 86.096 | 87.055 | 120.080 | 129.100 | 130.081 | 136.074 | 147.109 | 201.124 | 229.118 | 233.165 | 240.136 | 258.142 | 261.157 | 375.229 | 390.193 | 441.231 | 496.764 <sup>+2</sup> | 517.781 | 533.290 | 534.268 <sup>+2</sup> | 775.437 |
|------------------------|--------|--------|--------|--------|--------|--------|---------|---------|---------|---------|---------|---------|---------|---------|---------|---------|---------|---------|---------|---------|-----------------------|---------|---------|-----------------------|---------|
| Frac. Inten.(% of TIC) | 3.02   | 0.38   | 0.65   | 3.53   | 0.80   | 3.41   | 1.42    | 0.28    | 8.75    | 0.12    | 5.01    | 4.05    | 4.23    | 17.54   | 3.95    | 4.54    | 5.70    | 3.67    | 2.97    | 3.36    | 3.64                  | 4.91    | 5.18    | 4.82                  | 4.07    |
| Rel. Inten.(% of BP)   | 17.21  | 2.16   | 3.69   | 20.10  | 4.58   | 19.45  | 8.09    | 1.61    | 49.90   | 0.66    | 28.56   | 23.10   | 24.14   | 100.00  | 22.51   | 25.87   | 32.47   | 20.95   | 16.95   | 19.13   | 20.76                 | 27.96   | 29.53   | 27.50                 | 23.21   |
| Score                  | -0.17  | 0.50   | 0.50   | -0.20  | 0.22   | -0.19  | 1.00    | 0.20    | 0.50    | 1.00    | 1.50    | 0.50    | 0.75    | 0.50    | 0.50    | 0.75    | 0.50    | 1.50    | 1.50    | -0.17   | -0.19                 | -0.28   | 1.50    | 1.50                  | 1.50    |
| Ion-type               | V      | KQ     | LI     |        | a1     | RKQ    | y1-NH3  | Y       | y1      | VE-28   | VE      | a2      | SAV-H2O | y2-H2O  | b2      | y3      |         |         |         |         |                       |         | y5      | y6 <sup>+2</sup>      | y6      |
| Delta ppm              |        | -5.2   | -19.9  |        | -9.6   |        | -18.9   | -19.7   | -38.9   | -16.1   | -23.1   | -3.3    | -7.8    | -4.0    | 3.9     | -9.0    | -14.4   | 13.8    |         |         |                       |         | -5.9    | -8.3                  | 7.7     |

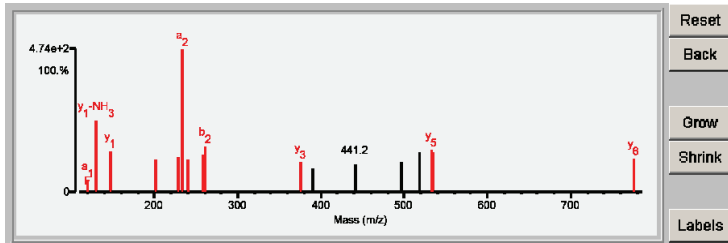

Result Summary

| Rank | Score | SPI (%) | BCS | # Unmatched Ions | Variable sites | Sequence             | MH <sup>+</sup> Calculated (Da) | MH <sup>+</sup> Error (Da) | MH <sup>+</sup> Error (ppm) | Protein MW/pl (Da) | Species | Accession # | Protein Name                                                                 |
|------|-------|---------|-----|------------------|----------------|----------------------|---------------------------------|----------------------------|-----------------------------|--------------------|---------|-------------|------------------------------------------------------------------------------|
| 1    | 12.42 | 63.8    | 6   | 8/25             | K74k           | (K)ELTSLVKEVYPEAR(K) | 1633.8796                       | 114.0545                   | 6.6                         | 17561.2/9.38       | HUMAN   | O00422      | Histone deacetylase complex subunit SAP18 OS=Homo sapiens GN=SAP18 PE=1 SV=1 |

Detailed Results

| Rank | Score | SPI (%) | BCS | # Unmatched Ions | Variable sites | Sequence                                       | MH <sup>+</sup> Calculated (Da) | MH <sup>+</sup> Error (Da) | MH <sup>+</sup> Error (ppm) | Protein MW/pl (Da) | Species | Accession # | MS-Digest Index # | Protein Name                                                                 |
|------|-------|---------|-----|------------------|----------------|------------------------------------------------|---------------------------------|----------------------------|-----------------------------|--------------------|---------|-------------|-------------------|------------------------------------------------------------------------------|
| 1    | 12.42 | 63.8    | 6   | 8/25             | K74k           | (K)E L T S L V / k / E / V / Y / F E / A R (K) | 1633.8796                       | 114.0545                   | 6.6                         | 17561.2/9.38       | HUMAN   | O00422      | 706743            | Histone deacetylase complex subunit SAP18 OS=Homo sapiens GN=SAP18 PE=1 SV=1 |

| Fragment-ion (m/z)      | 70.065 | 72.080 | 74.062 | 84.042 | 84.080 | 86.093 | 110.071 | 113.073             | 136.076 | 197.127             | 215.139 | 246.154 | 353.155 | 395.192 | 453.256              | 471.272 | 472.249 | 516.302 | 525.298 | 553.289 <sup>+2</sup> | 625.357             | 635.318 | 677.689 | 734.384 | 863.430 |
|-------------------------|--------|--------|--------|--------|--------|--------|---------|---------------------|---------|---------------------|---------|---------|---------|---------|----------------------|---------|---------|---------|---------|-----------------------|---------------------|---------|---------|---------|---------|
| Frac. Inten. (% of TIC) | 0.00   | 0.21   | 2.79   | 0.08   | 13.17  | 0.28   | 2.36    | 2.68                | 0.30    | 3.31                | 10.23   | 8.11    | 2.48    | 6.91    | 2.59                 | 2.73    | 12.96   | 2.48    | 3.20    | 2.47                  | 2.95                | 8.71    | 2.62    | 3.64    | 2.74    |
| Rel. Inten. (% of BP)   | 0.02   | 1.59   | 21.18  | 0.62   | 100.00 | 2.12   | 17.92   | 20.33               | 2.29    | 25.15               | 77.74   | 61.64   | 18.82   | 52.52   | 19.64                | 20.73   | 98.48   | 18.85   | 24.31   | 18.76                 | 22.42               | 66.14   | 19.89   | 27.62   | 20.78   |
| Score                   | 0.20   | 0.50   | -0.21  | 1.00   | -1.00  | 0.22   | -0.18   | -0.20               | 1.00    | 0.50                | 0.75    | 1.50    | -0.19   | -0.53   | 0.50                 | 0.75    | 1.50    | 0.50    | -0.24   | 1.50                  | 0.25                | 1.50    | -0.20   | 1.50    | 1.50    |
| Ion-type                | PR     | V      | V      | E      | LI     | LI     | Y       | LT-H <sub>2</sub> O | Y       | LT-H <sub>2</sub> O | a2      | y2      |         |         | kEV-H <sub>2</sub> O | kEV     | y4      | a5      |         | y6 <sup>+2</sup>      | b6-H <sub>2</sub> O | y5      |         | y6      | y7      |
| Delta ppm               | 3.9    | -14.9  |        | -32.0  |        | -37.5  |         |                     | 2.3     | -15.0               | -3.8    | -9.2    |         |         | 19.8                 | 31.3    | -4.7    | -3.8    |         | 6.4                   | -0.1                | 5.3     |         | 1.4     | 5.0     |

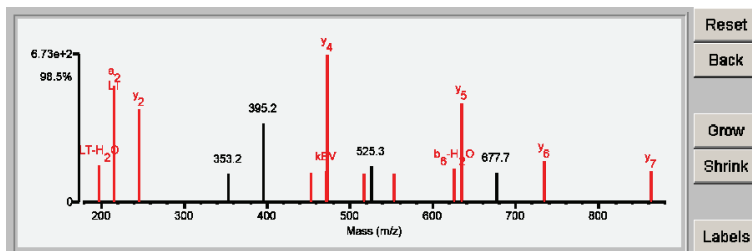

- Reset
- Back
- Grow
- Shrink
- Labels

Result Summary

| Rank | Score | SPI (%) | BCS | # Unmatched Ions | # Variable sites | Sequence               | MH <sup>+</sup> Calculated (Da) | MH <sup>+</sup> Error (Da) | MH <sup>+</sup> Error (ppm) | Protein MW/pl (Da) | Species | Accession #            | Protein Name                                       |
|------|-------|---------|-----|------------------|------------------|------------------------|---------------------------------|----------------------------|-----------------------------|--------------------|---------|------------------------|----------------------------------------------------|
| 1    | 9.48  | 68.4    | 5   | 10/25            | K100k            | (K)GTLVQTKGTGASGSFK(L) | 1538.8173                       | 114.0494                   | 3.9                         | 21842.2/10.99      | HUMAN   | <a href="#">Q02539</a> | Histone H1.1 OS=Homo sapiens GN=HIST1H1A PE=1 SV=3 |
| 1    | 9.48  | 68.4    | 5   | 10/25            | K97k             | (K)GTLVQTKGTGASGSFK(L) | 1538.8173                       | 114.0494                   | 3.9                         | 21364.9/10.94      | HUMAN   | <a href="#">P16403</a> | Histone H1.2 OS=Homo sapiens GN=HIST1H1C PE=1 SV=2 |
| 1    | 9.48  | 68.4    | 5   | 10/25            | K98k             | (K)GTLVQTKGTGASGSFK(L) | 1538.8173                       | 114.0494                   | 3.9                         | 22350.0/11.02      | HUMAN   | <a href="#">P16402</a> | Histone H1.3 OS=Homo sapiens GN=HIST1H1D PE=1 SV=2 |
| 1    | 9.48  | 68.4    | 5   | 10/25            | K97k             | (K)GTLVQTKGTGASGSFK(L) | 1538.8173                       | 114.0494                   | 3.9                         | 21865.4/11.03      | HUMAN   | <a href="#">P10412</a> | Histone H1.4 OS=Homo sapiens GN=HIST1H1E PE=1 SV=2 |
| 1    | 9.48  | 68.4    | 5   | 10/25            | K100k            | (K)GTLVQTKGTGASGSFK(L) | 1538.8173                       | 114.0494                   | 3.9                         | 22580.3/10.91      | HUMAN   | <a href="#">P16401</a> | Histone H1.5 OS=Homo sapiens GN=HIST1H1B PE=1 SV=3 |

Detailed Results

| Rank | Score | SPI (%) | BCS | # Unmatched Ions | # Variable sites | Sequence               | MH <sup>+</sup> Calculated (Da) | MH <sup>+</sup> Error (Da) | MH <sup>+</sup> Error (ppm) | Protein MW/pl (Da) | Species | Accession #            | MS-Digest Index #      | Protein Name                                       |
|------|-------|---------|-----|------------------|------------------|------------------------|---------------------------------|----------------------------|-----------------------------|--------------------|---------|------------------------|------------------------|----------------------------------------------------|
| 1    | 9.48  | 68.4    | 5   | 10/25            | K100k            | (K)GTLVQTKGTGASGSFK(L) | 1538.8173                       | 114.0494                   | 3.9                         | 21842.2/10.99      | HUMAN   | <a href="#">Q02539</a> | <a href="#">271327</a> | Histone H1.1 OS=Homo sapiens GN=HIST1H1A PE=1 SV=3 |
| 1    | 9.48  | 68.4    | 5   | 10/25            | K97k             | (K)GTLVQTKGTGASGSFK(L) | 1538.8173                       | 114.0494                   | 3.9                         | 21364.9/10.94      | HUMAN   | <a href="#">P16403</a> | <a href="#">271345</a> | Histone H1.2 OS=Homo sapiens GN=HIST1H1C PE=1 SV=2 |
| 1    | 9.48  | 68.4    | 5   | 10/25            | K98k             | (K)GTLVQTKGTGASGSFK(L) | 1538.8173                       | 114.0494                   | 3.9                         | 22350.0/11.02      | HUMAN   | <a href="#">P16402</a> | <a href="#">271361</a> | Histone H1.3 OS=Homo sapiens GN=HIST1H1D PE=1 SV=2 |
| 1    | 9.48  | 68.4    | 5   | 10/25            | K97k             | (K)GTLVQTKGTGASGSFK(L) | 1538.8173                       | 114.0494                   | 3.9                         | 21865.4/11.03      | HUMAN   | <a href="#">P10412</a> | <a href="#">271371</a> | Histone H1.4 OS=Homo sapiens GN=HIST1H1E PE=1 SV=2 |
| 1    | 9.48  | 68.4    | 5   | 10/25            | K100k            | (K)GTLVQTKGTGASGSFK(L) | 1538.8173                       | 114.0494                   | 3.9                         | 22580.3/10.91      | HUMAN   | <a href="#">P16401</a> | <a href="#">271381</a> | Histone H1.5 OS=Homo sapiens GN=HIST1H1B PE=1 SV=3 |

| Fragment-ion (m/z)      | 72.080 | 84.042 | 84.080 | 86.058 | 86.096 | 96.041 | 101.069 | 113.067 | 117.100 | 120.078 | 129.101 | 131.078 | 185.163 | 228.132 | 254.151 | 437.204 | 454.252 | 525.267 | 577.794 <sup>+2</sup> | 624.315 <sup>+2</sup> | 632.817 <sup>+2</sup> | 653.334 | 682.351 | 691.353 <sup>+2</sup> | 811.393 |
|-------------------------|--------|--------|--------|--------|--------|--------|---------|---------|---------|---------|---------|---------|---------|---------|---------|---------|---------|---------|-----------------------|-----------------------|-----------------------|---------|---------|-----------------------|---------|
| Frac. Inten. (% of TIC) | 0.19   | 3.07   | 0.39   | 2.59   | 0.87   | 2.54   | 0.13    | 3.43    | 2.91    | 0.15    | 0.09    | 6.73    | 3.92    | 2.94    | 10.57   | 3.22    | 2.59    | 8.28    | 3.19                  | 4.47                  | 9.29                  | 6.52    | 2.82    | 6.13                  | 12.94   |
| Rel. Inten. (% of BP)   | 1.49   | 23.73  | 3.04   | 20.03  | 6.75   | 19.59  | 0.97    | 26.54   | 22.47   | 1.19    | 0.71    | 52.01   | 30.29   | 22.70   | 81.68   | 24.91   | 20.00   | 63.97   | 24.66                 | 34.51                 | 71.80                 | 50.37   | 21.77   | 47.39                 | 100.00  |
| Score                   | 0.50   | -0.24  | 0.50   | -0.20  | 0.22   | -0.20  |         | -0.27   | -0.22   | 1.00    | 0.20    | 0.50    | -0.30   | 0.75    | 0.25    | -0.25   | -0.20   | 1.50    | 1.50                  | -0.35                 | 0.50                  | 1.50    | -0.22   | 1.50                  | 1.50    |
| Ion-type                | V      | KQ     |        |        | LI     | KQ     |         |         |         | F       | RKQ     | a2      |         | VQ      | b3-H2O  |         |         | y5      | y11 <sup>+2</sup>     |                       | y12-H2O <sup>+2</sup> | y7      |         | y13 <sup>+2</sup>     | y9      |
| Delta ppm               | -5.2   |        | -5.7   |        | -9.6   |        |         |         |         | -24.8   | -11.9   | -33.6   |         | -16.5   | -1.6    |         |         | 0.7     | 0.4                   |                       | -1.2                  | 13.9    |         | -6.1                  | -2.3    |

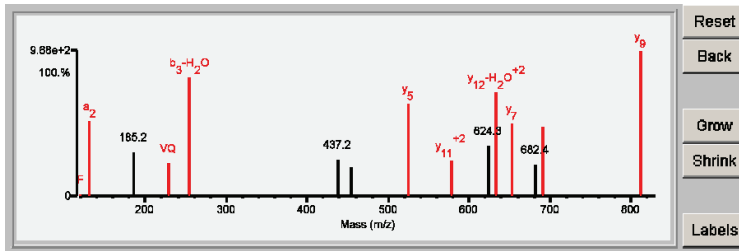



Result Summary

| Rank | Score | SPI (%) | BCS | # Unmatched Ions | Variable sites | Sequence           | MH <sup>+</sup> Calculated (Da) | MH <sup>+</sup> Error (Da) | MH <sup>+</sup> Error (ppm) | Protein MW/pI (Da) | Species | Accession # | Protein Name                                       |
|------|-------|---------|-----|------------------|----------------|--------------------|---------------------------------|----------------------------|-----------------------------|--------------------|---------|-------------|----------------------------------------------------|
| 1    | 19.93 | 95.4    | 10  | 2/25             | K67k           | (K)KALAAAGYDVEK(N) | 1235.6630                       | 114.0588                   | 11.8                        | 21842.2/10.99      | HUMAN   | Q02539      | Histone H1.1 OS=Homo sapiens GN=HIST1H1A PE=1 SV=3 |
| 1    | 19.93 | 95.4    | 10  | 2/25             | K64k           | (K)KALAAAGYDVEK(N) | 1235.6630                       | 114.0588                   | 11.8                        | 21364.9/10.94      | HUMAN   | P16403      | Histone H1.2 OS=Homo sapiens GN=HIST1H1C PE=1 SV=2 |
| 1    | 19.93 | 95.4    | 10  | 2/25             | K65k           | (K)KALAAAGYDVEK(N) | 1235.6630                       | 114.0588                   | 11.8                        | 22350.0/11.02      | HUMAN   | P16402      | Histone H1.3 OS=Homo sapiens GN=HIST1H1D PE=1 SV=2 |
| 1    | 19.93 | 95.4    | 10  | 2/25             | K64k           | (K)KALAAAGYDVEK(N) | 1235.6630                       | 114.0588                   | 11.8                        | 21865.4/11.03      | HUMAN   | P10412      | Histone H1.4 OS=Homo sapiens GN=HIST1H1E PE=1 SV=2 |
| 1    | 19.93 | 95.4    | 10  | 2/25             | K68k           | (K)KALAAAGYDVEK(N) | 1235.6630                       | 114.0588                   | 11.8                        | 22019.1/11.71      | HUMAN   | P22492      | Histone H1t OS=Homo sapiens GN=HIST1H1T PE=1 SV=4  |

Detailed Results

| Rank | Score | SPI (%) | BCS | # Unmatched Ions | Variable sites | Sequence                                     | MH <sup>+</sup> Calculated (Da) | MH <sup>+</sup> Error (Da) | MH <sup>+</sup> Error (ppm) | Protein MW/pI (Da) | Species | Accession # | MS-Digest Index # | Protein Name                                       |
|------|-------|---------|-----|------------------|----------------|----------------------------------------------|---------------------------------|----------------------------|-----------------------------|--------------------|---------|-------------|-------------------|----------------------------------------------------|
| 1    | 19.93 | 95.4    | 10  | 2/25             | K67k           | (K)k A L L A A I A / G Y / D / V / E / K (N) | 1235.6630                       | 114.0588                   | 11.8                        | 21842.2/10.99      | HUMAN   | Q02539      | 271327            | Histone H1.1 OS=Homo sapiens GN=HIST1H1A PE=1 SV=3 |
| 1    | 19.93 | 95.4    | 10  | 2/25             | K64k           | (K)k A L L A A I A / G Y / D / V / E / K (N) | 1235.6630                       | 114.0588                   | 11.8                        | 21364.9/10.94      | HUMAN   | P16403      | 271345            | Histone H1.2 OS=Homo sapiens GN=HIST1H1C PE=1 SV=2 |
| 1    | 19.93 | 95.4    | 10  | 2/25             | K65k           | (K)k A L L A A I A / G Y / D / V / E / K (N) | 1235.6630                       | 114.0588                   | 11.8                        | 22350.0/11.02      | HUMAN   | P16402      | 271361            | Histone H1.3 OS=Homo sapiens GN=HIST1H1D PE=1 SV=2 |
| 1    | 19.93 | 95.4    | 10  | 2/25             | K64k           | (K)k A L L A A I A / G Y / D / V / E / K (N) | 1235.6630                       | 114.0588                   | 11.8                        | 21865.4/11.03      | HUMAN   | P10412      | 271371            | Histone H1.4 OS=Homo sapiens GN=HIST1H1E PE=1 SV=2 |
| 1    | 19.93 | 95.4    | 10  | 2/25             | K68k           | (K)k A L L A A I A / G Y / D / V / E / K (N) | 1235.6630                       | 114.0588                   | 11.8                        | 22019.1/11.71      | HUMAN   | P22492      | 271477            | Histone H1t OS=Homo sapiens GN=HIST1H1T PE=1 SV=4  |

| Fragment-ion (m/z)      | 72.081 | 84.080 | 86.095 | 115.085 | 129.100 | 136.074 | 143.081 | 147.111 | 258.140 | 276.157 | 314.185 | 336.119 | 375.229 | 384.183 | 407.172 | 427.259 | 455.203 | 490.246 | 498.308 | 569.341 | 653.315 | 697.387 | 710.336 | 781.371 | 852.426 |
|-------------------------|--------|--------|--------|---------|---------|---------|---------|---------|---------|---------|---------|---------|---------|---------|---------|---------|---------|---------|---------|---------|---------|---------|---------|---------|---------|
| Frac. Inten. (% of TIC) | 0.07   | 0.43   | 0.16   | 2.75    | 0.09    | 0.24    | 2.27    | 2.14    | 2.70    | 3.87    | 3.56    | 5.66    | 3.92    | 2.49    | 2.84    | 4.62    | 2.08    | 7.17    | 7.45    | 12.19   | 4.49    | 2.20    | 18.55   | 5.82    | 2.24    |
| Rel. Inten. (% of BP)   | 0.38   | 2.30   | 0.84   | 14.84   | 0.50    | 1.30    | 12.26   | 11.56   | 14.55   | 20.84   | 19.18   | 30.51   | 21.11   | 13.44   | 15.33   | 24.89   | 11.22   | 38.65   | 40.15   | 65.69   | 24.18   | 11.84   | 100.00  | 31.37   | 12.08   |
| Score                   | 0.50   | 0.50   | 0.22   | 0.50    | 0.20    | 1.00    | 0.75    | 1.50    | 0.50    | 1.50    | 0.50    | 0.75    | 1.50    | -0.13   | 0.75    | 0.50    | -0.11   | 1.50    | 0.50    | 0.50    | 1.50    | 0.50    | 1.50    | 1.50    | 1.50    |
| Ion-type                | V      | KQ     | LI     | AA-28   | RKQ     | Y       | AA      | Y1      | Y2+2O   | Y2      | b2      | GYD     | Y3      |         | AGYD    | b3      |         | Y4      | b4      | b5      | Y5      | b7      | Y6      | Y6      | Y6      |
| Delta ppm               | 5.9    | -10.4  | -14.2  | -11.2   | -16.6   | -11.7   | -2.8    | -10.9   | -20.7   | 6.9     | 9.3     | -0.0    | 13.3    |         | 39.7    | -16.5   |         | -9.5    | 9.3     | 0.0     | 1.4     | -17.0   | 0.4     | -2.1    | 19.2    |

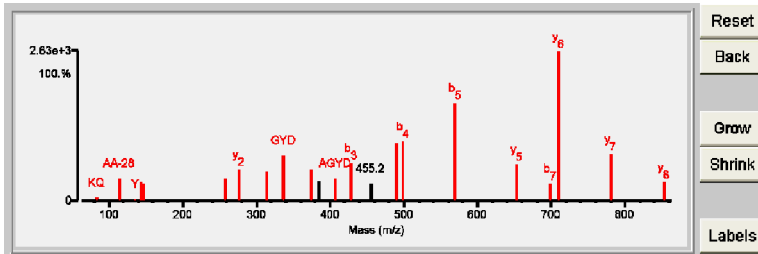

Result Summary

| Rank | Score | SPI (%) | BCS | # Unmatched Ions | Variable sites | Sequence                | MH <sup>+</sup> Calculated (Da) | MH <sup>+</sup> Error (Da) | MH <sup>+</sup> Error (ppm) | Protein MW/PI (Da) | Species | Accession # | Protein Name                                       |
|------|-------|---------|-----|------------------|----------------|-------------------------|---------------------------------|----------------------------|-----------------------------|--------------------|---------|-------------|----------------------------------------------------|
| 1    | 25.77 | 97.9    | 11  | 1/25             | K46k           | (K)ASGPPVSELITkVAASK(E) | 1725.9745                       | 114.0436                   | 0.4                         | 21364.9/10.94      | HUMAN   | P16403      | Histone H1.2 OS=Homo sapiens GN=HIST1H1C PE=1 SV=2 |
| 1    | 25.77 | 97.9    | 11  | 1/25             | K47k           | (K)ASGPPVSELITkVAASK(E) | 1725.9745                       | 114.0436                   | 0.4                         | 22350.0/11.02      | HUMAN   | P16402      | Histone H1.3 OS=Homo sapiens GN=HIST1H1D PE=1 SV=2 |
| 1    | 25.77 | 97.9    | 11  | 1/25             | K46k           | (K)ASGPPVSELITkVAASK(E) | 1725.9745                       | 114.0436                   | 0.4                         | 21865.4/11.03      | HUMAN   | P10412      | Histone H1.4 OS=Homo sapiens GN=HIST1H1E PE=1 SV=2 |
| 2    | 18.68 | 82.7    | 7   | 5/25             | K52k           | (K)ASGPPVSELITkVAASK(E) | 1725.9745                       | 114.0436                   | 0.4                         | 21364.9/10.94      | HUMAN   | P16403      | Histone H1.2 OS=Homo sapiens GN=HIST1H1C PE=1 SV=2 |
| 2    | 18.68 | 82.7    | 7   | 5/25             | K53k           | (K)ASGPPVSELITkVAASK(E) | 1725.9745                       | 114.0436                   | 0.4                         | 22350.0/11.02      | HUMAN   | P16402      | Histone H1.3 OS=Homo sapiens GN=HIST1H1D PE=1 SV=2 |

Detailed Results

| Rank | Score | SPI (%) | BCS | # Unmatched Ions | Variable sites | Sequence                                                          | MH <sup>+</sup> Calculated (Da) | MH <sup>+</sup> Error (Da) | MH <sup>+</sup> Error (ppm) | Protein MW/PI (Da) | Species | Accession # | MS-Digest Index # | Protein Name                                       |
|------|-------|---------|-----|------------------|----------------|-------------------------------------------------------------------|---------------------------------|----------------------------|-----------------------------|--------------------|---------|-------------|-------------------|----------------------------------------------------|
| 1    | 25.77 | 97.9    | 11  | 1/25             | K46k           | (K) A S I G / P / P V / S E L I / T / K / A / V / A A / S K ( E ) | 1725.9745                       | 114.0436                   | 0.4                         | 21364.9/10.94      | HUMAN   | P16403      | 271345            | Histone H1.2 OS=Homo sapiens GN=HIST1H1C PE=1 SV=2 |
| 1    | 25.77 | 97.9    | 11  | 1/25             | K47k           | (K) A S I G / P / P V / S E L I / T / K / A / V / A A / S K ( E ) | 1725.9745                       | 114.0436                   | 0.4                         | 22350.0/11.02      | HUMAN   | P16402      | 271361            | Histone H1.3 OS=Homo sapiens GN=HIST1H1D PE=1 SV=2 |
| 1    | 25.77 | 97.9    | 11  | 1/25             | K46k           | (K) A S I G / P / P V / S E L I / T / K / A / V / A A / S K ( E ) | 1725.9745                       | 114.0436                   | 0.4                         | 21865.4/11.03      | HUMAN   | P10412      | 271371            | Histone H1.4 OS=Homo sapiens GN=HIST1H1E PE=1 SV=2 |

| Fragment-ion (m/z)      | 70.064 | 84.080 | 86.094 | 127.085 | 131.080 | 141.065             | 155.080 | 159.074 | 169.127 | 198.083             | 234.144 | 376.218 | 413.196 | 445.261 <sup>+2</sup> | 475.284 | 542.323 <sup>+3</sup> | 546.320 | 561.317 <sup>+3</sup> | 666.379 <sup>+2</sup> | 764.438 <sup>+2</sup> | 788.457 | 812.955 <sup>+2</sup> | 841.478 <sup>+2</sup> | 889.501 | 1002.585 |
|-------------------------|--------|--------|--------|---------|---------|---------------------|---------|---------|---------|---------------------|---------|---------|---------|-----------------------|---------|-----------------------|---------|-----------------------|-----------------------|-----------------------|---------|-----------------------|-----------------------|---------|----------|
| Frac. Inten. (% of TIC) | 0.01   | 0.15   | 0.26   | 8.99    | 3.74    | 2.57                | 3.87    | 3.44    | 2.15    | 2.62                | 3.64    | 4.00    | 2.72    | 4.05                  | 2.52    | 8.61                  | 5.04    | 2.06                  | 3.63                  | 13.98                 | 2.41    | 8.30                  | 5.46                  | 3.37    | 2.40     |
| Rel. Inten. (% of BP)   | 0.07   | 1.05   | 1.88   | 64.33   | 26.73   | 18.39               | 27.72   | 24.61   | 15.36   | 18.72               | 26.05   | 28.63   | 19.49   | 29.00                 | 18.01   | 61.58                 | 36.06   | 14.72                 | 25.98                 | 100.00                | 17.25   | 59.39                 | 39.08                 | 24.12   | 17.20    |
| Score                   | 0.20   | 0.50   | 0.22   | 0.50    | 0.50    | 0.50                | 0.75    | 0.75    | -0.15   | 0.25                | 1.50    | 1.50    | 0.75    | 1.50                  | 1.50    | 1.50                  | 1.50    | 1.50                  | 1.50                  | 1.50                  | 1.50    | 1.50                  | 1.50                  | 1.50    | 1.50     |
| Ion-type                | PR     | KQ     | LI     | GP-28   | a2      | b2-H <sub>2</sub> O | GP      | b2      |         | b3-H <sub>2</sub> O | y2      | y4      | PVSE    | y8 <sup>+2</sup>      | y5      | y15 <sup>+3</sup>     | y6      | y16 <sup>+3</sup>     | y12 <sup>+2</sup>     | y14 <sup>+2</sup>     | y7      | y15 <sup>+2</sup>     | y16 <sup>+2</sup>     | y9      |          |
| Delta ppm               | -18.9  | -12.8  | -22.4  | -22.7   | -22.9   | -11.0               | -16.1   | -22.7   |         | -27.3               | -5.3    | -3.3    | -18.8   | 4.9                   | -7.1    | 17.9                  | -8.9    | -6.5                  | -1.8                  | -3.6                  | -7.2    | -14.4                 | 0.1                   | -10.6   | -8.8     |

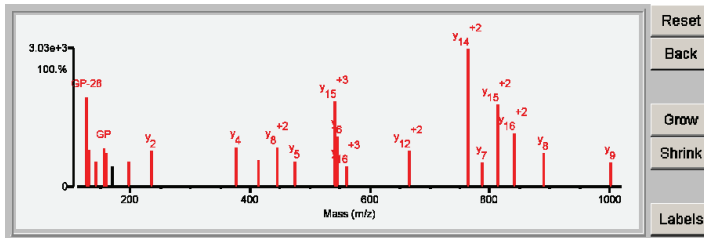

Reset

Back

Grow

Shrink

Labels

Result Summary

| Rank | Score | SPI (%) | BCS | # Unmatched Ions | Variable sites | Sequence                      | MH <sup>+</sup> Calculated (Da) | MH <sup>+</sup> Error (Da) | MH <sup>+</sup> Error (ppm) | Protein MW/pl (Da) | Species | Accession #            | Protein Name                                                |
|------|-------|---------|-----|------------------|----------------|-------------------------------|---------------------------------|----------------------------|-----------------------------|--------------------|---------|------------------------|-------------------------------------------------------------|
| 1    | 27.25 | 100.0   | 13  | 0/25             | K119K          | (K)LLGGVTIAQGGVLPNIQAVLLPK(T) | 2399.4748                       | 114.0460                   | 1.2                         | 14233.6/10.86      | HUMAN   | <a href="#">Q96QV6</a> | Histone H2A type 1-A OS=Homo sapiens GN=HIST1H2AA PE=1 SV=3 |
| 1    | 27.25 | 100.0   | 13  | 0/25             | K120K          | (K)LLGGVTIAQGGVLPNIQAVLLPK(T) | 2399.4748                       | 114.0460                   | 1.2                         | 14233.6/10.86      | HUMAN   | <a href="#">Q96QV6</a> | Histone H2A type 1-A OS=Homo sapiens GN=HIST1H2AA PE=1 SV=3 |
| 1    | 27.25 | 100.0   | 13  | 0/25             | K119K          | (K)LLGGVTIAQGGVLPNIQAVLLPK(T) | 2399.4748                       | 114.0460                   | 1.2                         | 13995.4/10.88      | HUMAN   | <a href="#">Q8IUE6</a> | Histone H2A type 2-B OS=Homo sapiens GN=HIST2H2AB PE=1 SV=3 |
| 1    | 27.25 | 100.0   | 13  | 0/25             | K120K          | (K)LLGGVTIAQGGVLPNIQAVLLPK(T) | 2399.4748                       | 114.0460                   | 1.2                         | 13995.4/10.88      | HUMAN   | <a href="#">Q8IUE6</a> | Histone H2A type 2-B OS=Homo sapiens GN=HIST2H2AB PE=1 SV=3 |
| 1    | 27.25 | 100.0   | 13  | 0/25             | K119K          | (K)LLGGVTIAQGGVLPNIQAVLLPK(T) | 2399.4748                       | 114.0460                   | 1.2                         | 15144.6/10.74      | HUMAN   | <a href="#">P16104</a> | Histone H2A.x OS=Homo sapiens GN=H2AFX PE=1 SV=2            |
| 1    | 27.25 | 100.0   | 13  | 0/25             | K120K          | (K)LLGGVTIAQGGVLPNIQAVLLPK(T) | 2399.4748                       | 114.0460                   | 1.2                         | 15144.6/10.74      | HUMAN   | <a href="#">P16104</a> | Histone H2A.x OS=Homo sapiens GN=H2AFX PE=1 SV=2            |

Detailed Results

| Rank | Score | SPI (%) | BCS | # Unmatched Ions | Variable sites | Sequence                                                 | MH <sup>+</sup> Calculated (Da) | MH <sup>+</sup> Error (Da) | MH <sup>+</sup> Error (ppm) | Protein MW/pl (Da) | Species | Accession #            | MS-Digest Index #      | Protein Name                                                |
|------|-------|---------|-----|------------------|----------------|----------------------------------------------------------|---------------------------------|----------------------------|-----------------------------|--------------------|---------|------------------------|------------------------|-------------------------------------------------------------|
| 1    | 27.25 | 100.0   | 13  | 0/25             | K119K          | (K)I L L G G V T I A Q G G V L P N I Q A V L L P K K (T) | 2399.4748                       | 114.0460                   | 1.2                         | 14233.6/10.86      | HUMAN   | <a href="#">Q96QV6</a> | <a href="#">271549</a> | Histone H2A type 1-A OS=Homo sapiens GN=HIST1H2AA PE=1 SV=3 |

  

| Fragment-Ion (m/z)      | 86.096 | 199.183 | 212.103 | 412.294 | 440.285 | 453.237 | 486.305 | 524.278 | 599.390 | 667.909 <sup>+2</sup> | 712.473 | 724.461 <sup>+2</sup> | 752.445 <sup>+2</sup> | 811.539 | 831.023 <sup>+2</sup> | 852.001 <sup>+2</sup> | 882.568 | 930.556 <sup>+2</sup> | 987.104 <sup>+2</sup> | 1010.643 | 1037.618 <sup>+2</sup> | 1066.628 | 1144.158 <sup>+2</sup> | 1179.692 | 1334.806 |
|-------------------------|--------|---------|---------|---------|---------|---------|---------|---------|---------|-----------------------|---------|-----------------------|-----------------------|---------|-----------------------|-----------------------|---------|-----------------------|-----------------------|----------|------------------------|----------|------------------------|----------|----------|
| Frac. Inten. (% of TIC) | 6.92   | 2.95    | 2.13    | 1.92    | 2.16    | 2.81    | 8.93    | 2.41    | 3.80    | 9.55                  | 5.76    | 3.70                  | 2.53                  | 3.34    | 2.41                  | 5.90                  | 3.96    | 5.51                  | 1.95                  | 2.91     | 4.54                   | 2.18     | 5.17                   | 3.22     | 3.33     |
| Rel. Inten. (% of BP)   | 72.40  | 30.91   | 22.33   | 20.09   | 22.64   | 29.40   | 93.46   | 25.21   | 39.81   | 100.00                | 60.33   | 38.72                 | 26.44                 | 34.91   | 25.28                 | 61.77                 | 41.49   | 57.69                 | 20.45                 | 30.51    | 47.52                  | 22.83    | 54.09                  | 33.67    | 34.89    |
| Score                   | 0.50   | 0.50    | 0.75    | 0.50    | 0.50    | 0.75    | 1.50    | 0.75    | 1.50    | 1.50                  | 1.50    | 1.50                  | 0.50                  | 1.50    | 1.50                  | 0.50                  | 1.50    | 1.50                  | 1.50                  | 1.50     | 1.50                   | 0.50     | 1.50                   | 0.50     | 1.50     |
| Ion-type                | a1     | a2      | PN      | a5      | b5      | PNIQ    | y3      | PNIQA   | y4      | y11 <sup>+2</sup>     | y5      | y12 <sup>+2</sup>     | b16 <sup>+2</sup>     | y6      | y15 <sup>+2</sup>     | b18 <sup>+2</sup>     | a10     | y17 <sup>+2</sup>     | y18 <sup>+2</sup>     | y8       | y19 <sup>+2</sup>      | b12      | y22 <sup>+2</sup>      | b13      | y11      |
| Delta ppm               | -13.0  | 0.50    | 9.1     | -4.1    | 3.3     | -6.5    | -20.5   | 3.6     | -11.5   | 4.8                   | -2.9    | 2.3                   | 10.1                  | -5.7    | -1.4                  | 16.2                  | 5.5     | -0.7                  | 5.2                   | 6.7      | -4.4                   | 0.9      | -17.9                  | -16.1    | -6.7     |
| LI                      | -0.3   |         |         |         |         |         |         |         |         |                       |         |                       |                       |         |                       |                       |         |                       |                       |          |                        |          |                        |          |          |

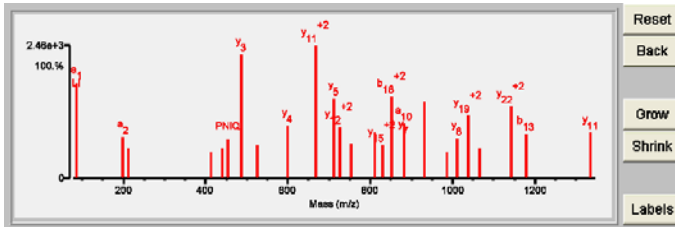

Result Summary

| Rank | Score | SPI (%) | BCS | # Unmatched Ions | Variable sites | Sequence                  | MH <sup>+</sup> Calculated (Da) | MH <sup>+</sup> Error (Da) | MH <sup>+</sup> Error (ppm) | Protein MW/Pl (Da) | Species | Accession # | Protein Name                                                  |
|------|-------|---------|-----|------------------|----------------|---------------------------|---------------------------------|----------------------------|-----------------------------|--------------------|---------|-------------|---------------------------------------------------------------|
| 1    | 19.97 | 89.9    | 8   | 3/25             | K119k          | (R)VTIAQGGVLPNIQAVLLPK(T) | 2059.2638                       | 114.0592                   | 7.5                         | 14135.6/11.05      | HUMAN   | P04908      | Histone H2A type 1-B/E OS=Homo sapiens GN=HIST1H2AB PE=1 SV=2 |
| 1    | 19.97 | 89.9    | 8   | 3/25             | K119k          | (R)VTIAQGGVLPNIQAVLLPK(T) | 2059.2638                       | 114.0592                   | 7.5                         | 14105.5/11.05      | HUMAN   | Q93077      | Histone H2A type 1-C OS=Homo sapiens GN=HIST1H2AC PE=1 SV=3   |
| 1    | 19.97 | 89.9    | 8   | 3/25             | K119k          | (K)VTIAQGGVLPNIQAVLLPK(T) | 2059.2638                       | 114.0592                   | 7.5                         | 14107.5/10.90      | HUMAN   | P20671      | Histone H2A type 1-D OS=Homo sapiens GN=HIST1H2AD PE=1 SV=2   |
| 1    | 19.97 | 89.9    | 8   | 3/25             | K119k          | (K)VTIAQGGVLPNIQAVLLPK(T) | 2059.2638                       | 114.0592                   | 7.5                         | 13906.3/10.88      | HUMAN   | Q96KK5      | Histone H2A type 1-H OS=Homo sapiens GN=HIST1H2AH PE=1 SV=3   |
| 1    | 19.97 | 89.9    | 8   | 3/25             | K119k          | (K)VTIAQGGVLPNIQAVLLPK(T) | 2059.2638                       | 114.0592                   | 7.5                         | 13936.3/10.88      | HUMAN   | Q99878      | Histone H2A type 1-J OS=Homo sapiens GN=HIST1H2AJ PE=1 SV=3   |
| 1    | 19.97 | 89.9    | 8   | 3/25             | K119k          | (K)VTIAQGGVLPNIQAVLLPK(T) | 2059.2638                       | 114.0592                   | 7.5                         | 14091.5/10.90      | HUMAN   | P0C0S8      | Histone H2A type 1 OS=Homo sapiens GN=HIST1H2AG PE=1 SV=2     |
| 1    | 19.97 | 89.9    | 8   | 3/25             | K119k          | (K)VTIAQGGVLPNIQAVLLPK(T) | 2059.2638                       | 114.0592                   | 7.5                         | 14095.6/10.90      | HUMAN   | Q6F13       | Histone H2A type 2-A OS=Homo sapiens GN=HIST2H2AA3 PE=1 SV=3  |
| 1    | 19.97 | 89.9    | 8   | 3/25             | K119k          | (K)VTIAQGGVLPNIQAVLLPK(T) | 2059.2638                       | 114.0592                   | 7.5                         | 13988.4/10.90      | HUMAN   | Q16777      | Histone H2A type 2-C OS=Homo sapiens GN=HIST2H2AC PE=1 SV=4   |
| 1    | 19.97 | 89.9    | 8   | 3/25             | K119k          | (R)VTIAQGGVLPNIQAVLLPK(T) | 2059.2638                       | 114.0592                   | 7.5                         | 14121.5/11.05      | HUMAN   | Q7L7L0      | Histone H2A type 3 OS=Homo sapiens GN=HIST3H2A PE=1 SV=3      |
| 1    | 19.97 | 89.9    | 8   | 3/25             | K119k          | (K)VTIAQGGVLPNIQAVLLPK(T) | 2059.2638                       | 114.0592                   | 7.5                         | 14019.5/10.90      | HUMAN   | Q9BTM1      | Histone H2A.J OS=Homo sapiens GN=H2AFJ PE=2 SV=1              |
| 2    | 19.08 | 87.1    | 8   | 4/25             | K120k          | (R)VTIAQGGVLPNIQAVLLPK(T) | 2059.2638                       | 114.0592                   | 7.5                         | 14135.6/11.05      | HUMAN   | P04908      | Histone H2A type 1-B/E OS=Homo sapiens GN=HIST1H2AB PE=1 SV=2 |

Detailed Results

| Rank | Score | SPI (%) | BCS | # Unmatched Ions | Variable sites | Sequence                  | MH <sup>+</sup> Calculated (Da) | MH <sup>+</sup> Error (Da) | MH <sup>+</sup> Error (ppm) | Protein MW/Pl (Da) | Species | Accession # | MS-Digest Index # | Protein Name                                                  |
|------|-------|---------|-----|------------------|----------------|---------------------------|---------------------------------|----------------------------|-----------------------------|--------------------|---------|-------------|-------------------|---------------------------------------------------------------|
| 1    | 19.97 | 89.9    | 8   | 3/25             | K119k          | (R)VTIAQGGVLPNIQAVLLPK(T) | 2059.2638                       | 114.0592                   | 7.5                         | 14135.6/11.05      | HUMAN   | P04908      | 271551            | Histone H2A type 1-B/E OS=Homo sapiens GN=HIST1H2AB PE=1 SV=2 |
| 1    | 19.97 | 89.9    | 8   | 3/25             | K119k          | (R)VTIAQGGVLPNIQAVLLPK(T) | 2059.2638                       | 114.0592                   | 7.5                         | 14105.5/11.05      | HUMAN   | Q93077      | 271553            | Histone H2A type 1-C OS=Homo sapiens GN=HIST1H2AC PE=1 SV=3   |
| 1    | 19.97 | 89.9    | 8   | 3/25             | K119k          | (K)VTIAQGGVLPNIQAVLLPK(T) | 2059.2638                       | 114.0592                   | 7.5                         | 14107.5/10.90      | HUMAN   | P20671      | 271557            | Histone H2A type 1-D OS=Homo sapiens GN=HIST1H2AD PE=1 SV=2   |
| 1    | 19.97 | 89.9    | 8   | 3/25             | K119k          | (K)VTIAQGGVLPNIQAVLLPK(T) | 2059.2638                       | 114.0592                   | 7.5                         | 13906.3/10.88      | HUMAN   | Q96KK5      | 271565            | Histone H2A type 1-H OS=Homo sapiens GN=HIST1H2AH PE=1 SV=3   |
| 1    | 19.97 | 89.9    | 8   | 3/25             | K119k          | (K)VTIAQGGVLPNIQAVLLPK(T) | 2059.2638                       | 114.0592                   | 7.5                         | 13936.3/10.88      | HUMAN   | Q99878      | 271569            | Histone H2A type 1-J OS=Homo sapiens GN=HIST1H2AJ PE=1 SV=3   |
| 1    | 19.97 | 89.9    | 8   | 3/25             | K119k          | (K)VTIAQGGVLPNIQAVLLPK(T) | 2059.2638                       | 114.0592                   | 7.5                         | 14091.5/10.90      | HUMAN   | P0C0S8      | 271585            | Histone H2A type 1 OS=Homo sapiens GN=HIST1H2AG PE=1 SV=2     |
| 1    | 19.97 | 89.9    | 8   | 3/25             | K119k          | (K)VTIAQGGVLPNIQAVLLPK(T) | 2059.2638                       | 114.0592                   | 7.5                         | 14095.6/10.90      | HUMAN   | Q6F13       | 271625            | Histone H2A type 2-A OS=Homo sapiens GN=HIST2H2AA3 PE=1 SV=3  |
| 1    | 19.97 | 89.9    | 8   | 3/25             | K119k          | (K)VTIAQGGVLPNIQAVLLPK(T) | 2059.2638                       | 114.0592                   | 7.5                         | 13988.4/10.90      | HUMAN   | Q16777      | 271635            | Histone H2A type 2-C OS=Homo sapiens GN=HIST2H2AC PE=1 SV=4   |
| 1    | 19.97 | 89.9    | 8   | 3/25             | K119k          | (R)VTIAQGGVLPNIQAVLLPK(T) | 2059.2638                       | 114.0592                   | 7.5                         | 14121.5/11.05      | HUMAN   | Q7L7L0      | 271685            | Histone H2A type 3 OS=Homo sapiens GN=HIST3H2A PE=1 SV=3      |
| 1    | 19.97 | 89.9    | 8   | 3/25             | K119k          | (K)VTIAQGGVLPNIQAVLLPK(T) | 2059.2638                       | 114.0592                   | 7.5                         | 14019.5/10.90      | HUMAN   | Q9BTM1      | 271761            | Histone H2A.J OS=Homo sapiens GN=H2AFJ PE=2 SV=1              |

| Fragment-ion (m/z)     | 72.079 | 86.094 | 212.103 | 296.192                          | 297.199 | 325.184 | 340.201 | 385.244 | 453.240 | 486.303 | 536.208 | 582.326 <sup>+2</sup> | 599.392 | 667.926 | 668.416 <sup>+2</sup> | 681.906 <sup>+2</sup> | 811.530 | 830.997 <sup>+2</sup> | 839.499 | 850.503 | 882.576                           | 886.527 <sup>+2</sup> | 895.034 <sup>+2</sup> | 1010.631 | 1334.822 |
|------------------------|--------|--------|---------|----------------------------------|---------|---------|---------|---------|---------|---------|---------|-----------------------|---------|---------|-----------------------|-----------------------|---------|-----------------------|---------|---------|-----------------------------------|-----------------------|-----------------------|----------|----------|
| Frac. Inten.(% of TIC) | 0.25   | 0.28   | 4.13    | 3.59                             | 2.57    | 3.26    | 2.97    | 3.55    | 3.47    | 21.85   | 2.63    | 2.46                  | 4.72    | 2.39    | 5.86                  | 4.71                  | 5.17    | 3.49                  | 3.39    | 2.49    | 5.26                              | 3.07                  | 3.07                  | 2.62     | 3.27     |
| Rel. Inten.(% of BP)   | 1.15   | 1.29   | 18.90   | 16.43                            | 11.78   | 14.94   | 13.61   | 16.25   | 15.87   | 100.00  | 12.02   | 11.26                 | 21.60   | 10.96   | 26.80                 | 21.56                 | 23.65   | 15.97                 | 15.50   | 11.39   | 24.09                             | 14.05                 | 11.98                 | 11.63    | 14.97    |
| Score                  | 0.50   | 0.22   | 0.75    | 0.25                             | 0.50    | 0.75    | 0.50    | 0.75    | 1.50    | 1.50    | 0.50    | 1.50                  | 1.50    | 0.50    | 1.50                  | 1.50                  | 1.50    | 1.50                  | 0.50    | 1.50    | 0.50                              | 1.50                  | 1.50                  | 1.50     | 1.50     |
| Ion-type               | b1     | LI     | PN      | b <sub>3</sub> -H <sub>2</sub> O | PN1-28  | PN1     | Pk      | b4      | PN1Q    | y3      |         |                       |         | y4      | y <sup>++11</sup>     | b14 <sup>+2</sup>     | a9      | y15 <sup>+2</sup>     | b9      | y7      | y16-NH <sub>3</sub> <sup>+2</sup> | y16 <sup>+2</sup>     | y8                    | a14      |          |
| Delta ppm              | -38.5  | -27.0  | -3.6    | -19.8                            | 20.5    | -13.6   | 7.0     | -4.0    | -15.7   | 0.1     |         |                       |         | 7.3     | 22.5                  | 25.1                  | 31.4    | -13.9                 | -0.6    | -1.7    | 2.2                               | -5.2                  | -4.5                  | 31.0     | 4.5      |
| V                      |        | -23.2  |         |                                  |         |         |         |         |         |         |         |                       |         |         |                       |                       |         |                       |         |         |                                   |                       |                       |          |          |

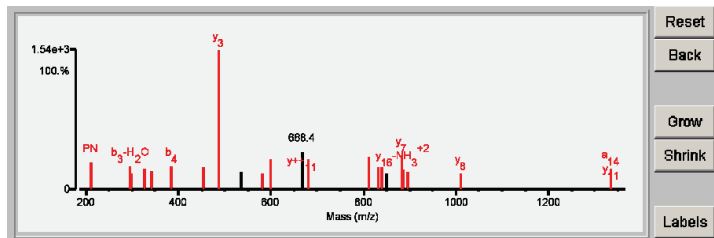

Result Summary

| Rank | Score | SPI (%) | BCS | # Unmatched Ions | Variable sites | Sequence                         | MH <sup>+</sup> Calculated (Da) | MH <sup>+</sup> Error (Da) | MH <sup>+</sup> Error (ppm) | Protein MW/pl (Da) | Species | Accession # | Protein Name                                                  |
|------|-------|---------|-----|------------------|----------------|----------------------------------|---------------------------------|----------------------------|-----------------------------|--------------------|---------|-------------|---------------------------------------------------------------|
| 1    | 20.16 | 92.3    | 8   | 2/25             | K119k K120k    | (R)VTIAQGGVLPNIQAVLLPKKTESHHK(A) | 2778.5989                       | 228.1125                   | 8.9                         | 14135.6/11.05      | HUMAN   | P04908      | Histone H2A type 1-B/E OS=Homo sapiens GN=HIST1H2AB PE=1 SV=2 |
| 1    | 20.16 | 92.3    | 8   | 2/25             | K119k K120k    | (R)VTIAQGGVLPNIQAVLLPKKTESHHK(A) | 2778.5989                       | 228.1125                   | 8.9                         | 14105.5/11.05      | HUMAN   | Q93077      | Histone H2A type 1-C OS=Homo sapiens GN=HIST1H2AC PE=1 SV=3   |
| 1    | 20.16 | 92.3    | 8   | 2/25             | K119k K120k    | (K)VTIAQGGVLPNIQAVLLPKKTESHHK(A) | 2778.5989                       | 228.1125                   | 8.9                         | 14107.5/10.90      | HUMAN   | P20671      | Histone H2A type 1-D OS=Homo sapiens GN=HIST1H2AD PE=1 SV=2   |
| 1    | 20.16 | 92.3    | 8   | 2/25             | K119k K120k    | (K)VTIAQGGVLPNIQAVLLPKKTESHHK(A) | 2778.5989                       | 228.1125                   | 8.9                         | 13906.3/10.88      | HUMAN   | Q96KK5      | Histone H2A type 1-H OS=Homo sapiens GN=HIST1H2AH PE=1 SV=3   |
| 1    | 20.16 | 92.3    | 8   | 2/25             | K119k K120k    | (T)VTIAQGGVLPNIQAVLLPKKTESHHK(T) | 2778.5989                       | 228.1125                   | 8.9                         | 13936.3/10.88      | HUMAN   | Q99878      | Histone H2A type 1-J OS=Homo sapiens GN=HIST1H2AJ PE=1 SV=3   |
| 1    | 20.16 | 92.3    | 8   | 2/25             | K119k K120k    | (K)VTIAQGGVLPNIQAVLLPKKTESHHK(A) | 2778.5989                       | 228.1125                   | 8.9                         | 14091.5/10.90      | HUMAN   | P0C0S8      | Histone H2A type 1 OS=Homo sapiens GN=HIST1H2AG PE=1 SV=2     |
| 1    | 20.16 | 92.3    | 8   | 2/25             | K119k K120k    | (K)VTIAQGGVLPNIQAVLLPKKTESHHK(A) | 2778.5989                       | 228.1125                   | 8.9                         | 14095.6/10.90      | HUMAN   | Q6F113      | Histone H2A type 2-A OS=Homo sapiens GN=HIST2H2AA3 PE=1 SV=3  |
| 1    | 20.16 | 92.3    | 8   | 2/25             | K119k K120k    | (R)VTIAQGGVLPNIQAVLLPKKTESHHK(A) | 2778.5989                       | 228.1125                   | 8.9                         | 14121.5/11.05      | HUMAN   | Q7L7L0      | Histone H2A type 3 OS=Homo sapiens GN=HIST3H2A PE=1 SV=3      |
| 2    | 18.48 | 89.7    | 7   | 3/25             | K120k K126k    | (R)VTIAQGGVLPNIQAVLLPKKTESHHK(A) | 2778.5989                       | 228.1125                   | 8.9                         | 14135.6/11.05      | HUMAN   | P04908      | Histone H2A type 1-B/E OS=Homo sapiens GN=HIST1H2AB PE=1 SV=2 |

Detailed Results

| Rank | Score | SPI (%) | BCS | # Unmatched Ions | Variable sites | Sequence                         | MH <sup>+</sup> Calculated (Da) | MH <sup>+</sup> Error (Da) | MH <sup>+</sup> Error (ppm) | Protein MW/pl (Da) | Species | Accession # | MS-Digest Index # | Protein Name                                                  |
|------|-------|---------|-----|------------------|----------------|----------------------------------|---------------------------------|----------------------------|-----------------------------|--------------------|---------|-------------|-------------------|---------------------------------------------------------------|
| 1    | 20.16 | 92.3    | 8   | 2/25             | K119k K120k    | (R)VTIAQGGVLPNIQAVLLPKKTESHHK(A) | 2778.5989                       | 228.1125                   | 8.9                         | 14135.6/11.05      | HUMAN   | P04908      | 271551            | Histone H2A type 1-B/E OS=Homo sapiens GN=HIST1H2AB PE=1 SV=2 |
| 1    | 20.16 | 92.3    | 8   | 2/25             | K119k K120k    | (R)VTIAQGGVLPNIQAVLLPKKTESHHK(A) | 2778.5989                       | 228.1125                   | 8.9                         | 14105.5/11.05      | HUMAN   | Q93077      | 271553            | Histone H2A type 1-C OS=Homo sapiens GN=HIST1H2AC PE=1 SV=3   |
| 1    | 20.16 | 92.3    | 8   | 2/25             | K119k K120k    | (K)VTIAQGGVLPNIQAVLLPKKTESHHK(A) | 2778.5989                       | 228.1125                   | 8.9                         | 14107.5/10.90      | HUMAN   | P20671      | 271557            | Histone H2A type 1-D OS=Homo sapiens GN=HIST1H2AD PE=1 SV=2   |
| 1    | 20.16 | 92.3    | 8   | 2/25             | K119k K120k    | (K)VTIAQGGVLPNIQAVLLPKKTESHHK(A) | 2778.5989                       | 228.1125                   | 8.9                         | 13906.3/10.88      | HUMAN   | Q96KK5      | 271565            | Histone H2A type 1-H OS=Homo sapiens GN=HIST1H2AH PE=1 SV=3   |
| 1    | 20.16 | 92.3    | 8   | 2/25             | K119k K120k    | (K)VTIAQGGVLPNIQAVLLPKKTESHHK(T) | 2778.5989                       | 228.1125                   | 8.9                         | 13936.3/10.88      | HUMAN   | Q99878      | 271569            | Histone H2A type 1-J OS=Homo sapiens GN=HIST1H2AJ PE=1 SV=3   |
| 1    | 20.16 | 92.3    | 8   | 2/25             | K119k K120k    | (K)VTIAQGGVLPNIQAVLLPKKTESHHK(A) | 2778.5989                       | 228.1125                   | 8.9                         | 14091.5/10.90      | HUMAN   | P0C0S8      | 271585            | Histone H2A type 1 OS=Homo sapiens GN=HIST1H2AG PE=1 SV=2     |
| 1    | 20.16 | 92.3    | 8   | 2/25             | K119k K120k    | (K)VTIAQGGVLPNIQAVLLPKKTESHHK(A) | 2778.5989                       | 228.1125                   | 8.9                         | 14095.6/10.90      | HUMAN   | Q6F113      | 271625            | Histone H2A type 2-A OS=Homo sapiens GN=HIST2H2AA3 PE=1 SV=3  |
| 1    | 20.16 | 92.3    | 8   | 2/25             | K119k K120k    | (R)VTIAQGGVLPNIQAVLLPKKTESHHK(A) | 2778.5989                       | 228.1125                   | 8.9                         | 14121.5/11.05      | HUMAN   | Q7L7L0      | 271685            | Histone H2A type 3 OS=Homo sapiens GN=HIST3H2A PE=1 SV=3      |

| Fragment-ion (m/z)     | 70.065 | 72.081 | 84.081 | 86.096 | 87.099 | 101.071 | 110.071 | 112.102 | 284.181 | 313.188 | 325.186 | 453.251 | 507.259 | 524.282              | 609.336          | 651.346 <sup>+2</sup> | 660.349 <sup>+2</sup> | 708.411           | 716.887 <sup>+2</sup> | 723.409 <sup>+3</sup> | 761.109 <sup>+3</sup> | 773.424 <sup>+2</sup> | 858.485 <sup>+2</sup> | 922.511 <sup>+2</sup> | 1319.683 |
|------------------------|--------|--------|--------|--------|--------|---------|---------|---------|---------|---------|---------|---------|---------|----------------------|------------------|-----------------------|-----------------------|-------------------|-----------------------|-----------------------|-----------------------|-----------------------|-----------------------|-----------------------|----------|
| Frac. Inten.(% of TIC) | 0.01   | 0.50   | 0.27   | 1.08   | 3.76   | 0.07    | 0.10    | 11.37   | 3.01    | 2.60    | 5.95    | 3.23    | 5.20    | 3.73                 | 2.91             | 3.29                  | 17.41                 | 2.81              | 5.64                  | 11.97                 | 2.34                  | 3.17                  | 3.26                  | 2.59                  | 3.72     |
| Rel. Inten.(% of BP)   | 0.06   | 2.88   | 1.56   | 6.19   | 21.61  | 0.42    | 0.58    | 65.31   | 17.30   | 14.95   | 34.17   | 18.58   | 29.86   | 21.41                | 16.72            | 18.91                 | 100.00                | 16.11             | 32.43                 | 68.78                 | 13.44                 | 18.19                 | 18.74                 | 14.89                 | 21.37    |
| Score                  | 0.20   | 0.50   | 0.22   | 0.22   | -0.22  | 1.00    | 0.75    | 1.50    | 0.75    | 0.75    | 0.75    | 0.75    | -0.30   | 0.75                 | 0.25             | 0.50                  | 1.50                  | 0.25              | 1.50                  | 1.50                  | 1.50                  | 1.50                  | 1.50                  | 1.50                  | 1.50     |
| Ion-type               | PR     | a1     | KQ     | LI     |        | KQ      | H       | PN      | IQA     | PNI     | PNIQ    | PNIQA   | b7-H2O  | y9-H2O <sup>+2</sup> | y9 <sup>+2</sup> | b8-H2O                | y10 <sup>+2</sup>     | y17 <sup>+3</sup> | y18 <sup>+3</sup>     | y11 <sup>+2</sup>     | y13 <sup>+2</sup>     | y14 <sup>+2</sup>     | y14 <sup>+2</sup>     | y9                    |          |
| Delta ppm              | -4.6   | -16.3  | -0.9   | -0.3   |        |         | -2.5    | -7.9    | 31.6    | -2.0    | -5.9    | 8.6     |         | -3.3                 | -1.5             | 10.8                  | 7.6                   | 8.2               | 1.4                   | 9.3                   | 15.2                  | -5.1                  | 4.1                   | 0.9                   | 1.1      |

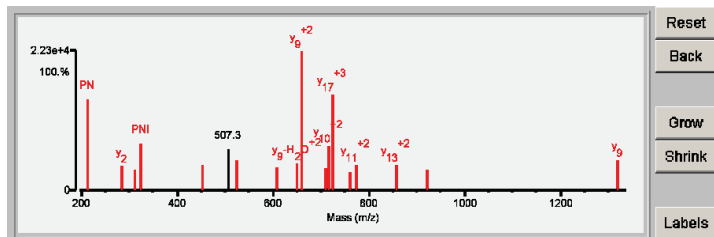

Result Summary

| Rank | Score | SPI (%) | BCS | # Unmatched Ions | Variable sites | Sequence                   | MH <sup>+</sup> Calculated (Da) | MH <sup>+</sup> Error (Da) | MH <sup>+</sup> Error (ppm) | Protein MW/PI (Da) | Species | Accession # | Protein Name                                                                           |
|------|-------|---------|-----|------------------|----------------|----------------------------|---------------------------------|----------------------------|-----------------------------|--------------------|---------|-------------|----------------------------------------------------------------------------------------|
| 1    | 23.75 | 100.0   | 11  | 0/25             | K120k          | (R)VTIAQGGVLPNIQAVLLPKk(T) | 2059.2638                       | 114.0440                   | 0.5                         | 14135.6/11.05      | HUMAN   | P04908      | Histone H2A type 1-B/E OS=Homo sapiens GN=HIST1H2AB PE=1 SV=2                          |
| 1    | 23.75 | 100.0   | 11  | 0/25             | K119k          | (R)VTIAQGGVLPNIQAVLLPKk(T) | 2059.2638                       | 114.0440                   | 0.5                         | 14135.6/11.05      | HUMAN   | P04908      | Histone H2A type 1-B/E OS=Homo sapiens GN=HIST1H2AB PE=1 SV=2                          |
| 1    | 23.75 | 100.0   | 11  | 0/25             | K120k          | (R)VTIAQGGVLPNIQAVLLPKk(T) | 2059.2638                       | 114.0440                   | 0.5                         | 14105.5/11.05      | HUMAN   | Q93077      | Histone H2A type 1-C OS=Homo sapiens GN=HIST1H2AC PE=1 SV=3                            |
| 1    | 23.75 | 100.0   | 11  | 0/25             | K119k          | (R)VTIAQGGVLPNIQAVLLPKk(T) | 2059.2638                       | 114.0440                   | 0.5                         | 14105.5/11.05      | HUMAN   | Q93077      | Histone H2A type 1-C OS=Homo sapiens GN=HIST1H2AC PE=1 SV=3                            |
| 1    | 23.75 | 100.0   | 11  | 0/25             | K119k          | (K)VTIAQGGVLPNIQAVLLPKk(T) | 2059.2638                       | 114.0440                   | 0.5                         | 14107.5/10.90      | HUMAN   | P20671      | Histone H2A type 1-D OS=Homo sapiens GN=HIST1H2AD PE=1 SV=2                            |
| 1    | 23.75 | 100.0   | 11  | 0/25             | K120k          | (K)VTIAQGGVLPNIQAVLLPKk(T) | 2059.2638                       | 114.0440                   | 0.5                         | 14107.5/10.90      | HUMAN   | P20671      | Histone H2A type 1-D OS=Homo sapiens GN=HIST1H2AD PE=1 SV=2                            |
| 1    | 23.75 | 100.0   | 11  | 0/25             | K119k          | (R)VTIAQGGVLPNIQAVLLPKk(T) | 2059.2638                       | 114.0440                   | 0.5                         | 13906.3/10.88      | HUMAN   | Q98KK5      | Histone H2A type 1-H OS=Homo sapiens GN=HIST1H2AH PE=1 SV=3                            |
| 1    | 23.75 | 100.0   | 11  | 0/25             | K120k          | (K)VTIAQGGVLPNIQAVLLPKk(T) | 2059.2638                       | 114.0440                   | 0.5                         | 13906.3/10.88      | HUMAN   | Q98KK5      | Histone H2A type 1-H OS=Homo sapiens GN=HIST1H2AH PE=1 SV=3                            |
| 1    | 23.75 | 100.0   | 11  | 0/25             | K119k          | (R)VTIAQGGVLPNIQAVLLPKk(T) | 2059.2638                       | 114.0440                   | 0.5                         | 13936.3/10.88      | HUMAN   | Q99878      | Histone H2A type 1-J OS=Homo sapiens GN=HIST1H2AJ PE=1 SV=3                            |
| 1    | 23.75 | 100.0   | 11  | 0/25             | K120k          | (K)VTIAQGGVLPNIQAVLLPKk(T) | 2059.2638                       | 114.0440                   | 0.5                         | 13936.3/10.88      | HUMAN   | Q99878      | Histone H2A type 1-J OS=Homo sapiens GN=HIST1H2AJ PE=1 SV=3                            |
| 1    | 23.75 | 100.0   | 11  | 0/25             | K120k          | (K)VTIAQGGVLPNIQAVLLPKk(T) | 2059.2638                       | 114.0440                   | 0.5                         | 14091.5/10.90      | HUMAN   | P0C058      | Histone H2A type 1 OS=Homo sapiens GN=HIST1H2AG PE=1 SV=2                              |
| 1    | 23.75 | 100.0   | 11  | 0/25             | K119k          | (K)VTIAQGGVLPNIQAVLLPKk(T) | 2059.2638                       | 114.0440                   | 0.5                         | 14091.5/10.90      | HUMAN   | P0C058      | Histone H2A type 1 OS=Homo sapiens GN=HIST1H2AG PE=1 SV=2                              |
| 1    | 23.75 | 100.0   | 11  | 0/25             | K119k          | (K)VTIAQGGVLPNIQAVLLPKk(T) | 2059.2638                       | 114.0440                   | 0.5                         | 14095.6/10.90      | HUMAN   | Q6F113      | Histone H2A type 2-A OS=Homo sapiens GN=HIST2H2AA3 PE=1 SV=3                           |
| 1    | 23.75 | 100.0   | 11  | 0/25             | K120k          | (K)VTIAQGGVLPNIQAVLLPKk(T) | 2059.2638                       | 114.0440                   | 0.5                         | 14095.6/10.90      | HUMAN   | Q6F113      | Histone H2A type 2-A OS=Homo sapiens GN=HIST2H2AA3 PE=1 SV=3                           |
| 1    | 23.75 | 100.0   | 11  | 0/25             | K119k          | (K)VTIAQGGVLPNIQAVLLPKk(T) | 2059.2638                       | 114.0440                   | 0.5                         | 13988.4/10.90      | HUMAN   | Q16777      | Histone H2A type 2-C OS=Homo sapiens GN=HIST2H2AC PE=1 SV=4                            |
| 1    | 23.75 | 100.0   | 11  | 0/25             | K120k          | (K)VTIAQGGVLPNIQAVLLPKk(T) | 2059.2638                       | 114.0440                   | 0.5                         | 13988.4/10.90      | HUMAN   | Q16777      | Histone H2A type 2-C OS=Homo sapiens GN=HIST2H2AC PE=1 SV=4                            |
| 1    | 23.75 | 100.0   | 11  | 0/25             | K119k          | (R)VTIAQGGVLPNIQAVLLPKk(T) | 2059.2638                       | 114.0440                   | 0.5                         | 14121.5/11.05      | HUMAN   | Q7L7L0      | Histone H2A type 3 OS=Homo sapiens GN=HIST3H2A PE=1 SV=3                               |
| 1    | 23.75 | 100.0   | 11  | 0/25             | K120k          | (R)VTIAQGGVLPNIQAVLLPKk(T) | 2059.2638                       | 114.0440                   | 0.5                         | 14121.5/11.05      | HUMAN   | Q7L7L0      | Histone H2A type 3 OS=Homo sapiens GN=HIST3H2A PE=1 SV=3                               |
| 1    | 23.75 | 100.0   | 11  | 0/25             | K120k          | (K)VTIAQGGVLPNIQAVLLPKk(T) | 2059.2638                       | 114.0440                   | 0.5                         | 14019.5/10.90      | HUMAN   | Q9B7M1      | Histone H2A.J OS=Homo sapiens GN=H2AFJ PE=2 SV=1                                       |
| 1    | 23.75 | 100.0   | 11  | 0/25             | K119k          | (K)VTIAQGGVLPNIQAVLLPKk(T) | 2059.2638                       | 114.0440                   | 0.5                         | 14019.5/10.90      | HUMAN   | Q9B7M1      | Histone H2A.J OS=Homo sapiens GN=H2AFJ PE=2 SV=1                                       |
| 2    | 3.42  | 52.2    | 2   | 19/25            | K869k          | (K)KCKTKVFSKIPFPPIR(Y)     | 2059.2249                       | 114.0828                   | 18.4                        | 207721.9/5.30      | HUMAN   | RP38398     | REVERSE Breast cancer type 1 susceptibility protein OS=Homo sapiens GN=BRCA1 PE=1 SV=2 |

Detailed Results

| Rank                                                                                                                                                                                                                                                                                                                                                                                                                                                                                                                                                                                                                                                                                                                                                                                                                                                                                                                                                                                                                                                                                                                                                                                                                                                                                                                                                                                                                                                                                                                                                                                                                                                                                                                                                                                                                                                                                                                                                                                                                                                                                                                                                                                                                                                                                                                                                                                                                                                                                                                                                                                                                                                                                                                                                                                                                                                                                                                                               | Score                            | SPI (%) | BCS            | # Unmatched Ions | Variable sites                   | Sequence                                        | MH <sup>+</sup> Calculated (Da) | MH <sup>+</sup> Error (Da) | MH <sup>+</sup> Error (ppm)      | Protein MW/PI (Da)               | Species        | Accession #    | MS-Digest Index # | Protein Name                                                  |                               |                |                               |                               |                               |                 |                 |                 |                 |                 |          |         |         |         |         |                       |         |                       |                       |                       |          |          |          |          |          |          |                         |      |      |      |       |      |      |      |      |      |      |      |      |      |      |      |      |      |      |      |       |      |      |      |      |      |                       |      |      |      |        |      |      |      |       |      |       |       |       |      |       |      |       |      |       |      |       |       |      |      |       |       |       |      |      |      |      |      |      |      |      |      |      |      |      |      |      |      |      |      |      |      |      |      |      |      |      |      |          |                                  |     |                |                |                                  |                |       |                |                                  |                                  |                |                |                |                                  |                               |                |                               |                               |                               |                 |                 |                 |                 |                 |           |     |     |      |      |     |      |      |      |     |      |      |      |      |      |      |      |     |      |      |      |      |      |      |      |      |
|----------------------------------------------------------------------------------------------------------------------------------------------------------------------------------------------------------------------------------------------------------------------------------------------------------------------------------------------------------------------------------------------------------------------------------------------------------------------------------------------------------------------------------------------------------------------------------------------------------------------------------------------------------------------------------------------------------------------------------------------------------------------------------------------------------------------------------------------------------------------------------------------------------------------------------------------------------------------------------------------------------------------------------------------------------------------------------------------------------------------------------------------------------------------------------------------------------------------------------------------------------------------------------------------------------------------------------------------------------------------------------------------------------------------------------------------------------------------------------------------------------------------------------------------------------------------------------------------------------------------------------------------------------------------------------------------------------------------------------------------------------------------------------------------------------------------------------------------------------------------------------------------------------------------------------------------------------------------------------------------------------------------------------------------------------------------------------------------------------------------------------------------------------------------------------------------------------------------------------------------------------------------------------------------------------------------------------------------------------------------------------------------------------------------------------------------------------------------------------------------------------------------------------------------------------------------------------------------------------------------------------------------------------------------------------------------------------------------------------------------------------------------------------------------------------------------------------------------------------------------------------------------------------------------------------------------------|----------------------------------|---------|----------------|------------------|----------------------------------|-------------------------------------------------|---------------------------------|----------------------------|----------------------------------|----------------------------------|----------------|----------------|-------------------|---------------------------------------------------------------|-------------------------------|----------------|-------------------------------|-------------------------------|-------------------------------|-----------------|-----------------|-----------------|-----------------|-----------------|----------|---------|---------|---------|---------|-----------------------|---------|-----------------------|-----------------------|-----------------------|----------|----------|----------|----------|----------|----------|-------------------------|------|------|------|-------|------|------|------|------|------|------|------|------|------|------|------|------|------|------|------|-------|------|------|------|------|------|-----------------------|------|------|------|--------|------|------|------|-------|------|-------|-------|-------|------|-------|------|-------|------|-------|------|-------|-------|------|------|-------|-------|-------|------|------|------|------|------|------|------|------|------|------|------|------|------|------|------|------|------|------|------|------|------|------|------|------|------|----------|----------------------------------|-----|----------------|----------------|----------------------------------|----------------|-------|----------------|----------------------------------|----------------------------------|----------------|----------------|----------------|----------------------------------|-------------------------------|----------------|-------------------------------|-------------------------------|-------------------------------|-----------------|-----------------|-----------------|-----------------|-----------------|-----------|-----|-----|------|------|-----|------|------|------|-----|------|------|------|------|------|------|------|-----|------|------|------|------|------|------|------|------|
| 1                                                                                                                                                                                                                                                                                                                                                                                                                                                                                                                                                                                                                                                                                                                                                                                                                                                                                                                                                                                                                                                                                                                                                                                                                                                                                                                                                                                                                                                                                                                                                                                                                                                                                                                                                                                                                                                                                                                                                                                                                                                                                                                                                                                                                                                                                                                                                                                                                                                                                                                                                                                                                                                                                                                                                                                                                                                                                                                                                  | 23.75                            | 100.0   | 11             | 0/25             | K120k                            | (R) V T I A Q G G V L P N I Q A V L L P K k (T) | 2059.2638                       | 114.0440                   | 0.5                              | 14135.6/11.05                    | HUMAN          | P04908         | 271551            | Histone H2A type 1-B/E OS=Homo sapiens GN=HIST1H2AB PE=1 SV=2 |                               |                |                               |                               |                               |                 |                 |                 |                 |                 |          |         |         |         |         |                       |         |                       |                       |                       |          |          |          |          |          |          |                         |      |      |      |       |      |      |      |      |      |      |      |      |      |      |      |      |      |      |      |       |      |      |      |      |      |                       |      |      |      |        |      |      |      |       |      |       |       |       |      |       |      |       |      |       |      |       |       |      |      |       |       |       |      |      |      |      |      |      |      |      |      |      |      |      |      |      |      |      |      |      |      |      |      |      |      |      |      |          |                                  |     |                |                |                                  |                |       |                |                                  |                                  |                |                |                |                                  |                               |                |                               |                               |                               |                 |                 |                 |                 |                 |           |     |     |      |      |     |      |      |      |     |      |      |      |      |      |      |      |     |      |      |      |      |      |      |      |      |
| <table border="1"> <thead> <tr> <th>Fragment-ion (m/z)</th> <th>296.197</th> <th>313.188</th> <th>385.244</th> <th>486.303</th> <th>495.295</th> <th>513.302</th> <th>526.298</th> <th>599.386</th> <th>609.336</th> <th>708.403</th> <th>712.470</th> <th>726.413</th> <th>811.523</th> <th>821.485</th> <th>831.006<sup>+2</sup></th> <th>839.496</th> <th>895.039<sup>+2</sup></th> <th>930.555<sup>+2</sup></th> <th>987.093<sup>+2</sup></th> <th>1334.812</th> <th>1447.893</th> <th>1574.924</th> <th>1603.988</th> <th>1661.009</th> <th>1688.004</th> </tr> </thead> <tbody> <tr> <td>Frac. Inten. (% of TIC)</td> <td>1.54</td> <td>1.38</td> <td>1.51</td> <td>23.03</td> <td>1.58</td> <td>1.69</td> <td>1.15</td> <td>4.35</td> <td>1.59</td> <td>3.62</td> <td>3.08</td> <td>4.38</td> <td>1.16</td> <td>3.96</td> <td>1.31</td> <td>5.58</td> <td>2.07</td> <td>3.82</td> <td>1.75</td> <td>15.66</td> <td>7.01</td> <td>1.27</td> <td>1.22</td> <td>3.15</td> <td>3.13</td> </tr> <tr> <td>Rel. Inten. (% of BP)</td> <td>6.70</td> <td>6.00</td> <td>6.57</td> <td>100.00</td> <td>6.86</td> <td>7.34</td> <td>4.98</td> <td>18.90</td> <td>6.90</td> <td>15.74</td> <td>13.38</td> <td>19.01</td> <td>5.02</td> <td>17.21</td> <td>5.68</td> <td>24.24</td> <td>8.98</td> <td>16.61</td> <td>7.60</td> <td>67.99</td> <td>30.43</td> <td>5.52</td> <td>5.31</td> <td>13.69</td> <td>13.61</td> </tr> <tr> <td>Score</td> <td>0.25</td> <td>0.75</td> <td>0.50</td> <td>1.50</td> <td>0.25</td> <td>0.50</td> <td>0.75</td> <td>1.50</td> <td>0.25</td> <td>0.25</td> <td>1.50</td> <td>0.50</td> <td>1.50</td> <td>0.50</td> <td>1.50</td> <td>0.50</td> <td>1.50</td> <td>1.50</td> <td>1.50</td> <td>1.50</td> <td>1.50</td> <td>1.50</td> <td>1.50</td> <td>1.50</td> <td>0.50</td> </tr> <tr> <td>Ion-type</td> <td>b<sub>3</sub>-H<sub>2</sub>O</td> <td>IQA</td> <td>b<sub>4</sub></td> <td>y<sub>3</sub></td> <td>b<sub>5</sub>-H<sub>2</sub>O</td> <td>b<sub>5</sub></td> <td>NIQAV</td> <td>y<sub>4</sub></td> <td>b<sub>7</sub>-H<sub>2</sub>O</td> <td>b<sub>8</sub>-H<sub>2</sub>O</td> <td>y<sub>5</sub></td> <td>b<sub>8</sub></td> <td>a<sub>9</sub></td> <td>b<sub>9</sub>-H<sub>2</sub>O</td> <td>y<sub>15</sub><sup>+2</sup></td> <td>b<sub>9</sub></td> <td>y<sub>16</sub><sup>+2</sup></td> <td>y<sub>17</sub><sup>+2</sup></td> <td>y<sub>18</sub><sup>+2</sup></td> <td>b<sub>14</sub></td> <td>y<sub>12</sub></td> <td>b<sub>16</sub></td> <td>y<sub>14</sub></td> <td>b<sub>17</sub></td> </tr> <tr> <td>Delta ppm</td> <td>0.4</td> <td>3.4</td> <td>-1.2</td> <td>-0.9</td> <td>4.3</td> <td>-1.4</td> <td>-1.1</td> <td>-2.9</td> <td>0.3</td> <td>-2.0</td> <td>-1.7</td> <td>-2.2</td> <td>23.9</td> <td>-3.7</td> <td>-3.2</td> <td>-2.9</td> <td>1.1</td> <td>-1.7</td> <td>-5.5</td> <td>24.9</td> <td>-4.6</td> <td>-1.4</td> <td>-0.8</td> <td>-1.1</td> <td>-4.2</td> </tr> </tbody> </table> |                                  |         |                |                  |                                  |                                                 |                                 |                            |                                  |                                  |                |                |                   |                                                               | Fragment-ion (m/z)            | 296.197        | 313.188                       | 385.244                       | 486.303                       | 495.295         | 513.302         | 526.298         | 599.386         | 609.336         | 708.403  | 712.470 | 726.413 | 811.523 | 821.485 | 831.006 <sup>+2</sup> | 839.496 | 895.039 <sup>+2</sup> | 930.555 <sup>+2</sup> | 987.093 <sup>+2</sup> | 1334.812 | 1447.893 | 1574.924 | 1603.988 | 1661.009 | 1688.004 | Frac. Inten. (% of TIC) | 1.54 | 1.38 | 1.51 | 23.03 | 1.58 | 1.69 | 1.15 | 4.35 | 1.59 | 3.62 | 3.08 | 4.38 | 1.16 | 3.96 | 1.31 | 5.58 | 2.07 | 3.82 | 1.75 | 15.66 | 7.01 | 1.27 | 1.22 | 3.15 | 3.13 | Rel. Inten. (% of BP) | 6.70 | 6.00 | 6.57 | 100.00 | 6.86 | 7.34 | 4.98 | 18.90 | 6.90 | 15.74 | 13.38 | 19.01 | 5.02 | 17.21 | 5.68 | 24.24 | 8.98 | 16.61 | 7.60 | 67.99 | 30.43 | 5.52 | 5.31 | 13.69 | 13.61 | Score | 0.25 | 0.75 | 0.50 | 1.50 | 0.25 | 0.50 | 0.75 | 1.50 | 0.25 | 0.25 | 1.50 | 0.50 | 1.50 | 0.50 | 1.50 | 0.50 | 1.50 | 1.50 | 1.50 | 1.50 | 1.50 | 1.50 | 1.50 | 1.50 | 0.50 | Ion-type | b <sub>3</sub> -H <sub>2</sub> O | IQA | b <sub>4</sub> | y <sub>3</sub> | b <sub>5</sub> -H <sub>2</sub> O | b <sub>5</sub> | NIQAV | y <sub>4</sub> | b <sub>7</sub> -H <sub>2</sub> O | b <sub>8</sub> -H <sub>2</sub> O | y <sub>5</sub> | b <sub>8</sub> | a <sub>9</sub> | b <sub>9</sub> -H <sub>2</sub> O | y <sub>15</sub> <sup>+2</sup> | b <sub>9</sub> | y <sub>16</sub> <sup>+2</sup> | y <sub>17</sub> <sup>+2</sup> | y <sub>18</sub> <sup>+2</sup> | b <sub>14</sub> | y <sub>12</sub> | b <sub>16</sub> | y <sub>14</sub> | b <sub>17</sub> | Delta ppm | 0.4 | 3.4 | -1.2 | -0.9 | 4.3 | -1.4 | -1.1 | -2.9 | 0.3 | -2.0 | -1.7 | -2.2 | 23.9 | -3.7 | -3.2 | -2.9 | 1.1 | -1.7 | -5.5 | 24.9 | -4.6 | -1.4 | -0.8 | -1.1 | -4.2 |
| Fragment-ion (m/z)                                                                                                                                                                                                                                                                                                                                                                                                                                                                                                                                                                                                                                                                                                                                                                                                                                                                                                                                                                                                                                                                                                                                                                                                                                                                                                                                                                                                                                                                                                                                                                                                                                                                                                                                                                                                                                                                                                                                                                                                                                                                                                                                                                                                                                                                                                                                                                                                                                                                                                                                                                                                                                                                                                                                                                                                                                                                                                                                 | 296.197                          | 313.188 | 385.244        | 486.303          | 495.295                          | 513.302                                         | 526.298                         | 599.386                    | 609.336                          | 708.403                          | 712.470        | 726.413        | 811.523           | 821.485                                                       | 831.006 <sup>+2</sup>         | 839.496        | 895.039 <sup>+2</sup>         | 930.555 <sup>+2</sup>         | 987.093 <sup>+2</sup>         | 1334.812        | 1447.893        | 1574.924        | 1603.988        | 1661.009        | 1688.004 |         |         |         |         |                       |         |                       |                       |                       |          |          |          |          |          |          |                         |      |      |      |       |      |      |      |      |      |      |      |      |      |      |      |      |      |      |      |       |      |      |      |      |      |                       |      |      |      |        |      |      |      |       |      |       |       |       |      |       |      |       |      |       |      |       |       |      |      |       |       |       |      |      |      |      |      |      |      |      |      |      |      |      |      |      |      |      |      |      |      |      |      |      |      |      |      |          |                                  |     |                |                |                                  |                |       |                |                                  |                                  |                |                |                |                                  |                               |                |                               |                               |                               |                 |                 |                 |                 |                 |           |     |     |      |      |     |      |      |      |     |      |      |      |      |      |      |      |     |      |      |      |      |      |      |      |      |
| Frac. Inten. (% of TIC)                                                                                                                                                                                                                                                                                                                                                                                                                                                                                                                                                                                                                                                                                                                                                                                                                                                                                                                                                                                                                                                                                                                                                                                                                                                                                                                                                                                                                                                                                                                                                                                                                                                                                                                                                                                                                                                                                                                                                                                                                                                                                                                                                                                                                                                                                                                                                                                                                                                                                                                                                                                                                                                                                                                                                                                                                                                                                                                            | 1.54                             | 1.38    | 1.51           | 23.03            | 1.58                             | 1.69                                            | 1.15                            | 4.35                       | 1.59                             | 3.62                             | 3.08           | 4.38           | 1.16              | 3.96                                                          | 1.31                          | 5.58           | 2.07                          | 3.82                          | 1.75                          | 15.66           | 7.01            | 1.27            | 1.22            | 3.15            | 3.13     |         |         |         |         |                       |         |                       |                       |                       |          |          |          |          |          |          |                         |      |      |      |       |      |      |      |      |      |      |      |      |      |      |      |      |      |      |      |       |      |      |      |      |      |                       |      |      |      |        |      |      |      |       |      |       |       |       |      |       |      |       |      |       |      |       |       |      |      |       |       |       |      |      |      |      |      |      |      |      |      |      |      |      |      |      |      |      |      |      |      |      |      |      |      |      |      |          |                                  |     |                |                |                                  |                |       |                |                                  |                                  |                |                |                |                                  |                               |                |                               |                               |                               |                 |                 |                 |                 |                 |           |     |     |      |      |     |      |      |      |     |      |      |      |      |      |      |      |     |      |      |      |      |      |      |      |      |
| Rel. Inten. (% of BP)                                                                                                                                                                                                                                                                                                                                                                                                                                                                                                                                                                                                                                                                                                                                                                                                                                                                                                                                                                                                                                                                                                                                                                                                                                                                                                                                                                                                                                                                                                                                                                                                                                                                                                                                                                                                                                                                                                                                                                                                                                                                                                                                                                                                                                                                                                                                                                                                                                                                                                                                                                                                                                                                                                                                                                                                                                                                                                                              | 6.70                             | 6.00    | 6.57           | 100.00           | 6.86                             | 7.34                                            | 4.98                            | 18.90                      | 6.90                             | 15.74                            | 13.38          | 19.01          | 5.02              | 17.21                                                         | 5.68                          | 24.24          | 8.98                          | 16.61                         | 7.60                          | 67.99           | 30.43           | 5.52            | 5.31            | 13.69           | 13.61    |         |         |         |         |                       |         |                       |                       |                       |          |          |          |          |          |          |                         |      |      |      |       |      |      |      |      |      |      |      |      |      |      |      |      |      |      |      |       |      |      |      |      |      |                       |      |      |      |        |      |      |      |       |      |       |       |       |      |       |      |       |      |       |      |       |       |      |      |       |       |       |      |      |      |      |      |      |      |      |      |      |      |      |      |      |      |      |      |      |      |      |      |      |      |      |      |          |                                  |     |                |                |                                  |                |       |                |                                  |                                  |                |                |                |                                  |                               |                |                               |                               |                               |                 |                 |                 |                 |                 |           |     |     |      |      |     |      |      |      |     |      |      |      |      |      |      |      |     |      |      |      |      |      |      |      |      |
| Score                                                                                                                                                                                                                                                                                                                                                                                                                                                                                                                                                                                                                                                                                                                                                                                                                                                                                                                                                                                                                                                                                                                                                                                                                                                                                                                                                                                                                                                                                                                                                                                                                                                                                                                                                                                                                                                                                                                                                                                                                                                                                                                                                                                                                                                                                                                                                                                                                                                                                                                                                                                                                                                                                                                                                                                                                                                                                                                                              | 0.25                             | 0.75    | 0.50           | 1.50             | 0.25                             | 0.50                                            | 0.75                            | 1.50                       | 0.25                             | 0.25                             | 1.50           | 0.50           | 1.50              | 0.50                                                          | 1.50                          | 0.50           | 1.50                          | 1.50                          | 1.50                          | 1.50            | 1.50            | 1.50            | 1.50            | 1.50            | 0.50     |         |         |         |         |                       |         |                       |                       |                       |          |          |          |          |          |          |                         |      |      |      |       |      |      |      |      |      |      |      |      |      |      |      |      |      |      |      |       |      |      |      |      |      |                       |      |      |      |        |      |      |      |       |      |       |       |       |      |       |      |       |      |       |      |       |       |      |      |       |       |       |      |      |      |      |      |      |      |      |      |      |      |      |      |      |      |      |      |      |      |      |      |      |      |      |      |          |                                  |     |                |                |                                  |                |       |                |                                  |                                  |                |                |                |                                  |                               |                |                               |                               |                               |                 |                 |                 |                 |                 |           |     |     |      |      |     |      |      |      |     |      |      |      |      |      |      |      |     |      |      |      |      |      |      |      |      |
| Ion-type                                                                                                                                                                                                                                                                                                                                                                                                                                                                                                                                                                                                                                                                                                                                                                                                                                                                                                                                                                                                                                                                                                                                                                                                                                                                                                                                                                                                                                                                                                                                                                                                                                                                                                                                                                                                                                                                                                                                                                                                                                                                                                                                                                                                                                                                                                                                                                                                                                                                                                                                                                                                                                                                                                                                                                                                                                                                                                                                           | b <sub>3</sub> -H <sub>2</sub> O | IQA     | b <sub>4</sub> | y <sub>3</sub>   | b <sub>5</sub> -H <sub>2</sub> O | b <sub>5</sub>                                  | NIQAV                           | y <sub>4</sub>             | b <sub>7</sub> -H <sub>2</sub> O | b <sub>8</sub> -H <sub>2</sub> O | y <sub>5</sub> | b <sub>8</sub> | a <sub>9</sub>    | b <sub>9</sub> -H <sub>2</sub> O                              | y <sub>15</sub> <sup>+2</sup> | b <sub>9</sub> | y <sub>16</sub> <sup>+2</sup> | y <sub>17</sub> <sup>+2</sup> | y <sub>18</sub> <sup>+2</sup> | b <sub>14</sub> | y <sub>12</sub> | b <sub>16</sub> | y <sub>14</sub> | b <sub>17</sub> |          |         |         |         |         |                       |         |                       |                       |                       |          |          |          |          |          |          |                         |      |      |      |       |      |      |      |      |      |      |      |      |      |      |      |      |      |      |      |       |      |      |      |      |      |                       |      |      |      |        |      |      |      |       |      |       |       |       |      |       |      |       |      |       |      |       |       |      |      |       |       |       |      |      |      |      |      |      |      |      |      |      |      |      |      |      |      |      |      |      |      |      |      |      |      |      |      |          |                                  |     |                |                |                                  |                |       |                |                                  |                                  |                |                |                |                                  |                               |                |                               |                               |                               |                 |                 |                 |                 |                 |           |     |     |      |      |     |      |      |      |     |      |      |      |      |      |      |      |     |      |      |      |      |      |      |      |      |
| Delta ppm                                                                                                                                                                                                                                                                                                                                                                                                                                                                                                                                                                                                                                                                                                                                                                                                                                                                                                                                                                                                                                                                                                                                                                                                                                                                                                                                                                                                                                                                                                                                                                                                                                                                                                                                                                                                                                                                                                                                                                                                                                                                                                                                                                                                                                                                                                                                                                                                                                                                                                                                                                                                                                                                                                                                                                                                                                                                                                                                          | 0.4                              | 3.4     | -1.2           | -0.9             | 4.3                              | -1.4                                            | -1.1                            | -2.9                       | 0.3                              | -2.0                             | -1.7           | -2.2           | 23.9              | -3.7                                                          | -3.2                          | -2.9           | 1.1                           | -1.7                          | -5.5                          | 24.9            | -4.6            | -1.4            | -0.8            | -1.1            | -4.2     |         |         |         |         |                       |         |                       |                       |                       |          |          |          |          |          |          |                         |      |      |      |       |      |      |      |      |      |      |      |      |      |      |      |      |      |      |      |       |      |      |      |      |      |                       |      |      |      |        |      |      |      |       |      |       |       |       |      |       |      |       |      |       |      |       |       |      |      |       |       |       |      |      |      |      |      |      |      |      |      |      |      |      |      |      |      |      |      |      |      |      |      |      |      |      |      |          |                                  |     |                |                |                                  |                |       |                |                                  |                                  |                |                |                |                                  |                               |                |                               |                               |                               |                 |                 |                 |                 |                 |           |     |     |      |      |     |      |      |      |     |      |      |      |      |      |      |      |     |      |      |      |      |      |      |      |      |

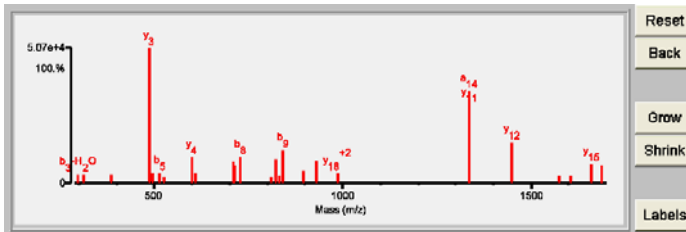

Result Summary

| Rank | Score | SPI (%) | BCS | # Unmatched Ions | Variable sites | Sequence                      | MH <sup>+</sup> Calculated (Da) | MH <sup>+</sup> Error (Da) | MH <sup>+</sup> Error (ppm) | Protein MW/pl (Da) | Species | Accession #            | Protein Name                                                 |
|------|-------|---------|-----|------------------|----------------|-------------------------------|---------------------------------|----------------------------|-----------------------------|--------------------|---------|------------------------|--------------------------------------------------------------|
| 1    | 16.35 | 85.6    | 5   | 5/25             | K100k          | (K)LLGKVTIAQGGVLPNIQAVLLPK(K) | 2342.4534                       | 114.0489                   | 2.4                         | 14107.5/10.90      | HUMAN   | <a href="#">P20671</a> | Histone H2A type 1-D OS=Homo sapiens GN=HIST1H2AD PE=1 SV=2  |
| 1    | 16.35 | 85.6    | 5   | 5/25             | K100k          | (K)LLGKVTIAQGGVLPNIQAVLLPK(K) | 2342.4534                       | 114.0489                   | 2.4                         | 13906.3/10.88      | HUMAN   | <a href="#">Q96KK5</a> | Histone H2A type 1-H OS=Homo sapiens GN=HIST1H2AH PE=1 SV=3  |
| 1    | 16.35 | 85.6    | 5   | 5/25             | K100k          | (K)LLGKVTIAQGGVLPNIQAVLLPK(K) | 2342.4534                       | 114.0489                   | 2.4                         | 13936.3/10.88      | HUMAN   | <a href="#">Q99878</a> | Histone H2A type 1-J OS=Homo sapiens GN=HIST1H2AJ PE=1 SV=3  |
| 1    | 16.35 | 85.6    | 5   | 5/25             | K100k          | (K)LLGKVTIAQGGVLPNIQAVLLPK(K) | 2342.4534                       | 114.0489                   | 2.4                         | 14091.5/10.90      | HUMAN   | <a href="#">P0C0S8</a> | Histone H2A type 1 OS=Homo sapiens GN=HIST1H2AG PE=1 SV=2    |
| 1    | 16.35 | 85.6    | 5   | 5/25             | K100k          | (K)LLGKVTIAQGGVLPNIQAVLLPK(K) | 2342.4534                       | 114.0489                   | 2.4                         | 14095.6/10.90      | HUMAN   | <a href="#">Q6F113</a> | Histone H2A type 2-A OS=Homo sapiens GN=HIST2H2AA3 PE=1 SV=3 |
| 1    | 16.35 | 85.6    | 5   | 5/25             | K100k          | (K)LLGKVTIAQGGVLPNIQAVLLPK(K) | 2342.4534                       | 114.0489                   | 2.4                         | 13988.4/10.90      | HUMAN   | <a href="#">Q16777</a> | Histone H2A type 2-C OS=Homo sapiens GN=HIST2H2AC PE=1 SV=4  |
| 1    | 16.35 | 85.6    | 5   | 5/25             | K100k          | (K)LLGKVTIAQGGVLPNIQAVLLPK(K) | 2342.4534                       | 114.0489                   | 2.4                         | 14019.5/10.90      | HUMAN   | <a href="#">Q9B7M1</a> | Histone H2A.J OS=Homo sapiens GN=H2AFJ PE=2 SV=1             |

Detailed Results

| Rank | Score | SPI (%) | BCS | # Unmatched Ions | Variable sites | Sequence                      | MH <sup>+</sup> Calculated (Da) | MH <sup>+</sup> Error (Da) | MH <sup>+</sup> Error (ppm) | Protein MW/pl (Da) | Species | Accession #            | MS-Digest Index #      | Protein Name                                                 |
|------|-------|---------|-----|------------------|----------------|-------------------------------|---------------------------------|----------------------------|-----------------------------|--------------------|---------|------------------------|------------------------|--------------------------------------------------------------|
| 1    | 16.35 | 85.6    | 5   | 5/25             | K100k          | (K)LLGKVTIAQGGVLPNIQAVLLPK(K) | 2342.4534                       | 114.0489                   | 2.4                         | 14107.5/10.90      | HUMAN   | <a href="#">P20671</a> | <a href="#">271557</a> | Histone H2A type 1-D OS=Homo sapiens GN=HIST1H2AD PE=1 SV=2  |
| 1    | 16.35 | 85.6    | 5   | 5/25             | K100k          | (K)LLGKVTIAQGGVLPNIQAVLLPK(K) | 2342.4534                       | 114.0489                   | 2.4                         | 13906.3/10.88      | HUMAN   | <a href="#">Q96KK5</a> | <a href="#">271565</a> | Histone H2A type 1-H OS=Homo sapiens GN=HIST1H2AH PE=1 SV=3  |
| 1    | 16.35 | 85.6    | 5   | 5/25             | K100k          | (K)LLGKVTIAQGGVLPNIQAVLLPK(K) | 2342.4534                       | 114.0489                   | 2.4                         | 13936.3/10.88      | HUMAN   | <a href="#">Q99878</a> | <a href="#">271569</a> | Histone H2A type 1-J OS=Homo sapiens GN=HIST1H2AJ PE=1 SV=3  |
| 1    | 16.35 | 85.6    | 5   | 5/25             | K100k          | (K)LLGKVTIAQGGVLPNIQAVLLPK(K) | 2342.4534                       | 114.0489                   | 2.4                         | 14091.5/10.90      | HUMAN   | <a href="#">P0C0S8</a> | <a href="#">271585</a> | Histone H2A type 1 OS=Homo sapiens GN=HIST1H2AG PE=1 SV=2    |
| 1    | 16.35 | 85.6    | 5   | 5/25             | K100k          | (K)LLGKVTIAQGGVLPNIQAVLLPK(K) | 2342.4534                       | 114.0489                   | 2.4                         | 14095.6/10.90      | HUMAN   | <a href="#">Q6F113</a> | <a href="#">271625</a> | Histone H2A type 2-A OS=Homo sapiens GN=HIST2H2AA3 PE=1 SV=3 |
| 1    | 16.35 | 85.6    | 5   | 5/25             | K100k          | (K)LLGKVTIAQGGVLPNIQAVLLPK(K) | 2342.4534                       | 114.0489                   | 2.4                         | 13988.4/10.90      | HUMAN   | <a href="#">Q16777</a> | <a href="#">271635</a> | Histone H2A type 2-C OS=Homo sapiens GN=HIST2H2AC PE=1 SV=4  |
| 1    | 16.35 | 85.6    | 5   | 5/25             | K100k          | (K)LLGKVTIAQGGVLPNIQAVLLPK(K) | 2342.4534                       | 114.0489                   | 2.4                         | 14019.5/10.90      | HUMAN   | <a href="#">Q9B7M1</a> | <a href="#">271761</a> | Histone H2A.J OS=Homo sapiens GN=H2AFJ PE=2 SV=1             |

| Fragment-ion (m/z)     | 70.064 | 72.080 | 86.095 | 199.180 | 212.097 | 244.165 | 325.185 | 453.253 | 537.816 <sup>+2</sup> | 546.847 <sup>+2</sup> | 603.391           | 603.889 | 612.370 <sup>+2</sup> | 623.347 | 626.384 <sup>+2</sup> | 709.417 | 726.449 | 736.420 | 768.499 | 849.523 | 909.509 | 1092.675 | 1205.756 | 1251.734 | 1364.805 |
|------------------------|--------|--------|--------|---------|---------|---------|---------|---------|-----------------------|-----------------------|-------------------|---------|-----------------------|---------|-----------------------|---------|---------|---------|---------|---------|---------|----------|----------|----------|----------|
| Frac. Inten.(% of TIC) | 0.00   | 0.23   | 11.44  | 2.69    | 2.44    | 5.23    | 2.29    | 2.09    | 3.24                  | 10.52                 | 4.75              | 3.13    | 4.09                  | 2.06    | 4.27                  | 3.01    | 2.51    | 3.17    | 3.03    | 2.80    | 2.19    | 16.81    | 2.89     | 2.59     | 2.52     |
| Rel. Inten.(% of BP)   | 0.02   | 1.39   | 68.06  | 15.99   | 14.50   | 31.10   | 13.64   | 12.42   | 19.25                 | 62.59                 | 28.28             | 18.64   | 24.34                 | 12.25   | 25.40                 | 17.89   | 14.91   | 18.85   | 18.04   | 16.65   | 13.04   | 100.00   | 17.16    | 15.41    | 15.00    |
| Score                  | 0.20   | 0.50   | 0.50   | 0.50    | 0.75    | 1.50    | 0.75    | 0.75    | -0.19                 | 1.50                  | 1.50              | -0.19   | 0.50                  | 0.75    | 0.50                  | -0.18   | 0.75    | 0.75    | 1.50    | -0.17   | -0.13   | 1.50     | 1.50     | 0.50     | 0.50     |
| Ion-type               | PR     | V      | a1     | a2      | PN      | y2      | PNI     | PNIQ    |                       | y10 <sup>+2</sup>     | y <sup>++11</sup> |         | a12 <sup>+2</sup>     | PNIQAV  | b12 <sup>+2</sup>     |         | b6      | PNIQAVL | y7      |         |         | y10      | y11      | b12      | b13      |
| Delta ppm              | -18.9  | -13.5  | -27.0  | -5.5    | -33.8   | -3.6    | -8.6    | 13.9    |                       | 8.8                   | 11.4              |         | -13.2                 | -7.6    | 14.1                  |         | -4.6    | -21.9   | 1.8     |         |         | -2.2     | -5.1     | -7.5     | -16.3    |
|                        |        |        | LI     |         |         |         |         |         |                       |                       |                   |         |                       |         |                       |         |         |         |         |         |         |          |          |          |          |
|                        |        |        | -14.2  |         |         |         |         |         |                       |                       |                   |         |                       |         |                       |         |         |         |         |         |         |          |          |          |          |

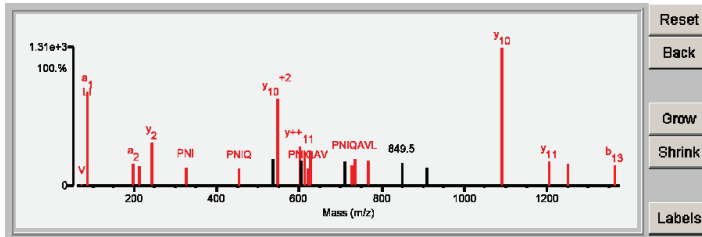

Result Summary

| Rank | Score | SPI (%) | BCS | # Unmatched Ions | Variable sites | Sequence                        | MH <sup>+</sup> Calculated (Da) | MH <sup>+</sup> Error (Da) | MH <sup>+</sup> Error (ppm) | Protein MW/pi (Da) | Species | Accession # | Protein Name                                                |
|------|-------|---------|-----|------------------|----------------|---------------------------------|---------------------------------|----------------------------|-----------------------------|--------------------|---------|-------------|-------------------------------------------------------------|
| 1    | 17.20 | 84.5    | 5   | 4/25             | K119k          | (K)VTIAQGGVLPNIQAVLLPKKTESHK(A) | 2641.5399                       | 114.0859                   | 15.6                        | 13988.4/10.90      | HUMAN   | Q16777      | Histone H2A type 2-C OS=Homo sapiens GN=HIST2H2AC PE=1 SV=4 |
| 1    | 17.20 | 84.5    | 5   | 4/25             | K120k          | (K)VTIAQGGVLPNIQAVLLPKKTESHK(A) | 2641.5399                       | 114.0859                   | 15.6                        | 13988.4/10.90      | HUMAN   | Q16777      | Histone H2A type 2-C OS=Homo sapiens GN=HIST2H2AC PE=1 SV=4 |
| 2    | 14.98 | 79.5    | 4   | 6/25             | K125k          | (K)VTIAQGGVLPNIQAVLLPKKTESHK(A) | 2641.5399                       | 114.0859                   | 15.6                        | 13988.4/10.90      | HUMAN   | Q16777      | Histone H2A type 2-C OS=Homo sapiens GN=HIST2H2AC PE=1 SV=4 |

Detailed Results

| Rank | Score | SPI (%) | BCS | # Unmatched Ions | Variable sites | Sequence                        | MH <sup>+</sup> Calculated (Da) | MH <sup>+</sup> Error (Da) | MH <sup>+</sup> Error (ppm) | Protein MW/pi (Da) | Species | Accession # | MS-Digest Index # | Protein Name                                                |
|------|-------|---------|-----|------------------|----------------|---------------------------------|---------------------------------|----------------------------|-----------------------------|--------------------|---------|-------------|-------------------|-------------------------------------------------------------|
| 1    | 17.20 | 84.5    | 5   | 4/25             | K119k          | (K)VTIAQGGVLPNIQAVLLPKKTESHK(A) | 2641.5399                       | 114.0859                   | 15.6                        | 13988.4/10.90      | HUMAN   | Q16777      | 271635            | Histone H2A type 2-C OS=Homo sapiens GN=HIST2H2AC PE=1 SV=4 |

  

| Fragment-ion (m/z)      | 70.065 | 72.081         | 84.045 | 86.096 | 87.100 | 101.070 | 110.070 | 120.080 | 129.101 | 130.085                         | 167.082 | 212.102 | 214.120                          | 296.195 | 313.187 | 325.171                          | 367.224        | 371.213 | 453.244 | 526.288 | 534.797 <sup>+2</sup>        | 591.331          | 639.692 <sup>+3</sup>         | 697.421        | 1068.591 |
|-------------------------|--------|----------------|--------|--------|--------|---------|---------|---------|---------|---------------------------------|---------|---------|----------------------------------|---------|---------|----------------------------------|----------------|---------|---------|---------|------------------------------|------------------|-------------------------------|----------------|----------|
| Frac. Inten. (% of TIC) | 0.01   | 0.89           | 0.52   | 1.59   | 5.17   | 0.16    | 0.19    | 5.67    | 0.10    | 3.41                            | 3.83    | 14.18   | 3.30                             | 3.07    | 3.89    | 5.31                             | 3.08           | 3.07    | 3.45    | 3.70    | 16.96                        | 3.51             | 6.94                          | 3.98           | 4.00     |
| Rel. Inten. (% of BP)   | 0.09   | 5.26           | 3.04   | 9.38   | 30.50  | 0.96    | 1.13    | 33.44   | 0.57    | 20.11                           | 22.60   | 83.58   | 19.45                            | 18.12   | 22.94   | 31.28                            | 18.16          | 18.09   | 20.35   | 21.83   | 100.00                       | 20.71            | 40.90                         | 23.46          | 23.58    |
| Score                   | 0.20   | 0.50           | 1.00   | 0.22   | -0.17  | 0.50    | 1.00    | -0.19   | 0.20    | 0.50                            | 0.75    | 0.75    | 0.25                             | 0.75    | 0.75    | -0.18                            | 0.75           | 1.50    | 0.75    | 0.75    | 1.50                         | 1.50             | 1.50                          | 1.50           | 1.50     |
| Ion-type                | PR     | a <sub>1</sub> | E      | LI     |        | QK      | H       |         | RKQ     | y <sub>1</sub> -NH <sub>3</sub> | PN      | GGV     | b <sub>3</sub> -H <sub>2</sub> O | IQA     |         | b <sub>4</sub> -H <sub>2</sub> O | y <sub>3</sub> | PNIQ    | NIQAV   |         | y <sub>8</sub> <sup>+2</sup> | y <sup>++9</sup> | y <sub>16</sub> <sup>+3</sup> | y <sub>8</sub> |          |
| Delta ppm               | -4.6   | -16.3          | 4.9    | -6.1   |        | -7.3    | -8.8    |         | -9.6    | -12.0                           | -10.2   | 2.3     | -11.0                            | -4.2    |         | -29.6                            | 24.9           | -5.8    | -22.2   |         | 7.2                          | -7.1             | -16.1                         | 12.7           | 10.5     |

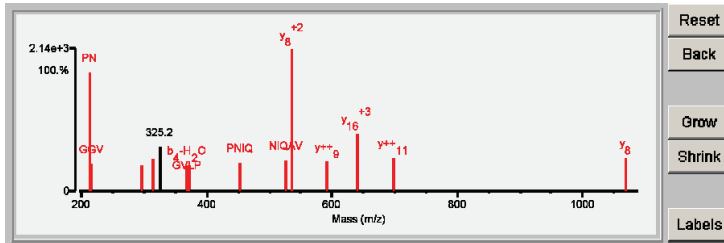



Result Summary

| Rank | Score | SPI (%) | BCS | # Unmatched Ions | Variable sites | Sequence                        | MH <sup>+</sup> Calculated (Da) | MH <sup>+</sup> Error (Da) | MH <sup>+</sup> Error (ppm) | Protein MW/pl (Da) | Species | Accession # | Protein Name                                                                            |
|------|-------|---------|-----|------------------|----------------|---------------------------------|---------------------------------|----------------------------|-----------------------------|--------------------|---------|-------------|-----------------------------------------------------------------------------------------|
| 1    | 13.66 | 77.6    | 4   | 5/24             | K120k K125k    | (K)VTIAQGGVLPNIQAVLLPKKTESHK(A) | 2641.5399                       | 228.1024                   | 5.8                         | 13988.4/10.90      | HUMAN   | Q16777      | Histone H2A type 2-C OS=Homo sapiens GN=HIST2HZAC PE=1 SV=4                             |
| 1    | 13.66 | 77.6    | 4   | 5/24             | K119k K125k    | (K)VTIAQGGVLPNIQAVLLPKKTESHK(A) | 2641.5399                       | 228.1024                   | 5.8                         | 13988.4/10.90      | HUMAN   | Q16777      | Histone H2A type 2-C OS=Homo sapiens GN=HIST2HZAC PE=1 SV=4                             |
| 1    | 13.66 | 77.6    | 4   | 5/24             | K119k K120k    | (K)VTIAQGGVLPNIQAVLLPKKTESHK(A) | 2641.5399                       | 228.1024                   | 5.8                         | 13988.4/10.90      | HUMAN   | Q16777      | Histone H2A type 2-C OS=Homo sapiens GN=HIST2HZAC PE=1 SV=4                             |
| 2    | 7.91  | 69.7    | 1   | 9/24             | M322m          | (R)LKmSTFPTLFRYSVALAQRQR(L)(E)  | 2853.6032                       | 16.0392                    | 15.4                        | 104576.9/8.48      | HUMAN   | RQ86UX2     | REVERSE Inter-alpha-trypsin inhibitor heavy chain H5 OS=Homo sapiens GN=ITIH5 PE=2 SV=2 |

Detailed Results

| Rank | Score | SPI (%) | BCS | # Unmatched Ions | Variable sites | Sequence                          | MH <sup>+</sup> Calculated (Da) | MH <sup>+</sup> Error (Da) | MH <sup>+</sup> Error (ppm) | Protein MW/pl (Da) | Species | Accession # | MS-Digest Index # | Protein Name                                                |
|------|-------|---------|-----|------------------|----------------|-----------------------------------|---------------------------------|----------------------------|-----------------------------|--------------------|---------|-------------|-------------------|-------------------------------------------------------------|
| 1    | 13.66 | 77.6    | 4   | 5/24             | K120k K125k    | (K)VTIAQGGVLPNIQAVL/L/PKKTESHK(A) | 2641.5399                       | 228.1024                   | 5.8                         | 13988.4/10.90      | HUMAN   | Q16777      | 271635            | Histone H2A type 2-C OS=Homo sapiens GN=HIST2HZAC PE=1 SV=4 |

| Fragment-Ion (m/z)      | 70.066 | 72.080 | 84.044 | 84.079 | 86.096 | 101.071 | 110.071 | 120.080 | 136.074 | 171.112 | 187.110 | 212.103                          | 296.200 | 313.189                          | 325.185 | 385.242 | 420.543 <sup>+3</sup> | 524.287 | 691.822 <sup>+2</sup>        | 623.349 | 648.357 <sup>+2</sup>        | 677.719 <sup>+3</sup>         | 707.385                      | 1182.614                     |
|-------------------------|--------|--------|--------|--------|--------|---------|---------|---------|---------|---------|---------|----------------------------------|---------|----------------------------------|---------|---------|-----------------------|---------|------------------------------|---------|------------------------------|-------------------------------|------------------------------|------------------------------|
| Frac. Inten. (% of TIC) | 0.01   | 0.84   | 0.27   | 0.25   | 1.82   | 0.14    | 0.16    | 3.92    | 10.15   | 3.31    | 7.18    | 9.76                             | 3.06    | 4.80                             | 5.14    | 3.15    | 3.31                  | 5.09    | 15.50                        | 3.01    | 4.36                         | 5.62                          | 3.89                         | 5.27                         |
| Rel. Inten. (% of BP)   | 0.10   | 5.43   | 1.77   | 1.61   | 11.74  | 0.88    | 1.01    | 25.27   | 65.51   | 21.34   | 46.35   | 62.97                            | 19.76   | 31.00                            | 33.17   | 20.33   | 21.34                 | 32.83   | 100.00                       | 19.43   | 28.16                        | 36.28                         | 25.09                        | 33.99                        |
| Score                   | 0.20   | 0.50   | 1.00   | 0.50   | 0.22   |         | 1.00    | -0.14   | -0.36   | 0.75    | -0.26   | 0.75                             | 0.25    | 0.75                             | 0.75    | 0.50    | -0.12                 | 0.75    | 1.50                         | 0.75    | 1.50                         | 1.50                          | -0.14                        | 1.50                         |
| Ion-type                | PR     | a1     | E      | KQ     | LI     | KQ      | H       |         |         | AV      | PN      | b <sub>3</sub> -H <sub>2</sub> O | PN      | b <sub>3</sub> -H <sub>2</sub> O | IQA     | PNi     | b <sub>4</sub>        | PNiQA   | y <sub>6</sub> <sup>+2</sup> | PNiQAV  | y <sub>6</sub> <sup>+2</sup> | y <sub>16</sub> <sup>+3</sup> | y <sub>6</sub> <sup>+2</sup> | y <sub>6</sub> <sup>+2</sup> |
| Delta ppm               | 5.3    | -26.0  | 0.50   | -15.2  | -3.8   |         | -3.4    |         |         | -12.9   |         | -3.1                             | 5.2     |                                  | 2.5     | -8.7    | -10.5                 |         | 5.3                          | 11.5    | -5.5                         | 0.7                           | 4.5                          | -6.9                         |

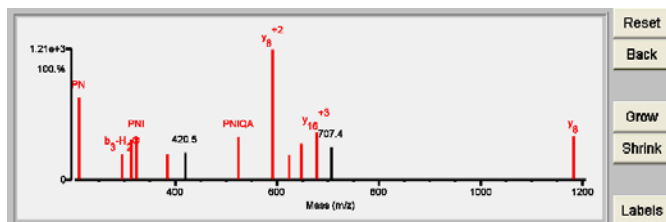

Result Summary

| Rank | Score | SPI (%) | BCS | # Unmatched Ions | Variable sites | Sequence              | MH <sup>+</sup> Calculated (Da) | MH <sup>+</sup> Error (Da) | MH <sup>+</sup> Error (ppm) | Protein MW/pI (Da) | Species | Accession #            | Protein Name                                                       |
|------|-------|---------|-----|------------------|----------------|-----------------------|---------------------------------|----------------------------|-----------------------------|--------------------|---------|------------------------|--------------------------------------------------------------------|
| 1    | 25.83 | 97.5    | 12  | 1/25             | K110k          | (R)LLPGLAKHAVSEGTK(A) | 1763.0062                       | 114.0532                   | 5.5                         | 14167.6/10.31      | HUMAN   | <a href="#">Q96A08</a> | Histone H2B type 1-A OS=Homo sapiens GN=HIST1H2BA PE=1 SV=3        |
| 1    | 25.83 | 97.5    | 12  | 1/25             | K109k          | (R)LLPGLAKHAVSEGTK(A) | 1763.0062                       | 114.0532                   | 5.5                         | 13950.3/10.31      | HUMAN   | <a href="#">P33778</a> | Histone H2B type 1-B OS=Homo sapiens GN=HIST1H2BB PE=1 SV=2        |
| 1    | 25.83 | 97.5    | 12  | 1/25             | K109k          | (R)LLPGLAKHAVSEGTK(A) | 1763.0062                       | 114.0532                   | 5.5                         | 13819.1/10.31      | HUMAN   | <a href="#">P62807</a> | Histone H2B type 1-C/E/F/GI OS=Homo sapiens GN=HIST1H2BC PE=1 SV=3 |
| 1    | 25.83 | 97.5    | 12  | 1/25             | K109k          | (R)LLPGLAKHAVSEGTK(A) | 1763.0062                       | 114.0532                   | 5.5                         | 13936.2/10.31      | HUMAN   | <a href="#">P58876</a> | Histone H2B type 1-D OS=Homo sapiens GN=HIST1H2BD PE=1 SV=2        |
| 1    | 25.83 | 97.5    | 12  | 1/25             | K109k          | (R)LLPGLAKHAVSEGTK(A) | 1763.0062                       | 114.0532                   | 5.5                         | 13892.2/10.31      | HUMAN   | <a href="#">Q93079</a> | Histone H2B type 1-H OS=Homo sapiens GN=HIST1H2BH PE=1 SV=3        |
| 1    | 25.83 | 97.5    | 12  | 1/25             | K109k          | (R)LLPGLAKHAVSEGTK(A) | 1763.0062                       | 114.0532                   | 5.5                         | 13904.2/10.31      | HUMAN   | <a href="#">P06899</a> | Histone H2B type 1-J OS=Homo sapiens GN=HIST1H2BJ PE=1 SV=3        |
| 1    | 25.83 | 97.5    | 12  | 1/25             | K109k          | (R)LLPGLAKHAVSEGTK(A) | 1763.0062                       | 114.0532                   | 5.5                         | 13890.2/10.31      | HUMAN   | <a href="#">Q60814</a> | Histone H2B type 1-K OS=Homo sapiens GN=HIST1H2BK PE=1 SV=3        |
| 1    | 25.83 | 97.5    | 12  | 1/25             | K109k          | (R)LLPGLAKHAVSEGTK(A) | 1763.0062                       | 114.0532                   | 5.5                         | 13952.3/10.31      | HUMAN   | <a href="#">Q99880</a> | Histone H2B type 1-L OS=Homo sapiens GN=HIST1H2BL PE=1 SV=3        |
| 1    | 25.83 | 97.5    | 12  | 1/25             | K109k          | (R)LLPGLAKHAVSEGTK(A) | 1763.0062                       | 114.0532                   | 5.5                         | 13989.3/10.31      | HUMAN   | <a href="#">Q99879</a> | Histone H2B type 1-M OS=Homo sapiens GN=HIST1H2BM PE=1 SV=3        |
| 1    | 25.83 | 97.5    | 12  | 1/25             | K109k          | (R)LLPGLAKHAVSEGTK(A) | 1763.0062                       | 114.0532                   | 5.5                         | 13922.2/10.31      | HUMAN   | <a href="#">Q99877</a> | Histone H2B type 1-N OS=Homo sapiens GN=HIST1H2BN PE=1 SV=3        |
| 1    | 25.83 | 97.5    | 12  | 1/25             | K109k          | (R)LLPGLAKHAVSEGTK(A) | 1763.0062                       | 114.0532                   | 5.5                         | 13906.2/10.31      | HUMAN   | <a href="#">P23527</a> | Histone H2B type 1-O OS=Homo sapiens GN=HIST1H2BO PE=1 SV=3        |
| 1    | 25.83 | 97.5    | 12  | 1/25             | K109k          | (R)LLPGLAKHAVSEGTK(A) | 1763.0062                       | 114.0532                   | 5.5                         | 13920.2/10.31      | HUMAN   | <a href="#">Q16778</a> | Histone H2B type 2-E OS=Homo sapiens GN=HIST2H2E PE=1 SV=3         |
| 1    | 25.83 | 97.5    | 12  | 1/25             | K109k          | (R)LLPGLAKHAVSEGTK(A) | 1763.0062                       | 114.0532                   | 5.5                         | 13904.3/10.31      | HUMAN   | <a href="#">Q5QNW6</a> | Histone H2B type 2-F OS=Homo sapiens GN=HIST2H2FB PE=1 SV=3        |
| 1    | 25.83 | 97.5    | 12  | 1/25             | K109k          | (R)LLPGLAKHAVSEGTK(A) | 1763.0062                       | 114.0532                   | 5.5                         | 13908.2/10.31      | HUMAN   | <a href="#">Q8N257</a> | Histone H2B type 3-B OS=Homo sapiens GN=HIST3H2BB PE=1 SV=3        |
| 1    | 25.83 | 97.5    | 12  | 1/25             | K109k          | (R)LLPGLAKHAVSEGTK(A) | 1763.0062                       | 114.0532                   | 5.5                         | 13944.3/10.37      | HUMAN   | <a href="#">P57053</a> | Histone H2B type F-S OS=Homo sapiens GN=H2BF5 PE=1 SV=2            |
| 2    | 15.89 | 82.1    | 6   | 8/25             | K118k          | (R)LLPGLAKHAVSEGTK(A) | 1763.0062                       | 114.0532                   | 5.5                         | 14167.6/10.31      | HUMAN   | <a href="#">Q96A08</a> | Histone H2B type 1-A OS=Homo sapiens GN=HIST1H2BA PE=1 SV=3        |

Detailed Results

| Rank | Score | SPI (%) | BCS | # Unmatched Ions | Variable sites | Sequence                                                      | MH <sup>+</sup> Calculated (Da) | MH <sup>+</sup> Error (Da) | MH <sup>+</sup> Error (ppm) | Protein MW/pI (Da) | Species | Accession #            | MS-Digest Index #      | Protein Name                                                       |
|------|-------|---------|-----|------------------|----------------|---------------------------------------------------------------|---------------------------------|----------------------------|-----------------------------|--------------------|---------|------------------------|------------------------|--------------------------------------------------------------------|
| 1    | 25.83 | 97.5    | 12  | 1/25             | K110k          | (R) L L L P / G / E / L / A K / B / A / V / S E / G T / K (A) | 1763.0062                       | 114.0532                   | 5.5                         | 14167.6/10.31      | HUMAN   | <a href="#">Q96A08</a> | <a href="#">272051</a> | Histone H2B type 1-A OS=Homo sapiens GN=HIST1H2BA PE=1 SV=3        |
| 1    | 25.83 | 97.5    | 12  | 1/25             | K109k          | (R) L L L P / G / E / L / A K / B / A / V / S E / G T / K (A) | 1763.0062                       | 114.0532                   | 5.5                         | 13950.3/10.31      | HUMAN   | <a href="#">P33778</a> | <a href="#">272057</a> | Histone H2B type 1-B OS=Homo sapiens GN=HIST1H2BB PE=1 SV=2        |
| 1    | 25.83 | 97.5    | 12  | 1/25             | K109k          | (R) L L L P / G / E / L / A K / B / A / V / S E / G T / K (A) | 1763.0062                       | 114.0532                   | 5.5                         | 13819.1/10.31      | HUMAN   | <a href="#">P62807</a> | <a href="#">272061</a> | Histone H2B type 1-C/E/F/GI OS=Homo sapiens GN=HIST1H2BC PE=1 SV=3 |
| 1    | 25.83 | 97.5    | 12  | 1/25             | K109k          | (R) L L L P / G / E / L / A K / B / A / V / S E / G T / K (A) | 1763.0062                       | 114.0532                   | 5.5                         | 13936.2/10.31      | HUMAN   | <a href="#">P58876</a> | <a href="#">272065</a> | Histone H2B type 1-D OS=Homo sapiens GN=HIST1H2BD PE=1 SV=2        |
| 1    | 25.83 | 97.5    | 12  | 1/25             | K109k          | (R) L L L P / G / E / L / A K / B / A / V / S E / G T / K (A) | 1763.0062                       | 114.0532                   | 5.5                         | 13892.2/10.31      | HUMAN   | <a href="#">Q93079</a> | <a href="#">272069</a> | Histone H2B type 1-H OS=Homo sapiens GN=HIST1H2BH PE=1 SV=3        |
| 1    | 25.83 | 97.5    | 12  | 1/25             | K109k          | (R) L L L P / G / E / L / A K / B / A / V / S E / G T / K (A) | 1763.0062                       | 114.0532                   | 5.5                         | 13904.2/10.31      | HUMAN   | <a href="#">P06899</a> | <a href="#">272073</a> | Histone H2B type 1-J OS=Homo sapiens GN=HIST1H2BJ PE=1 SV=3        |
| 1    | 25.83 | 97.5    | 12  | 1/25             | K109k          | (R) L L L P / G / E / L / A K / B / A / V / S E / G T / K (A) | 1763.0062                       | 114.0532                   | 5.5                         | 13890.2/10.31      | HUMAN   | <a href="#">Q60814</a> | <a href="#">272077</a> | Histone H2B type 1-K OS=Homo sapiens GN=HIST1H2BK PE=1 SV=3        |
| 1    | 25.83 | 97.5    | 12  | 1/25             | K109k          | (R) L L L P / G / E / L / A K / B / A / V / S E / G T / K (A) | 1763.0062                       | 114.0532                   | 5.5                         | 13952.3/10.31      | HUMAN   | <a href="#">Q99880</a> | <a href="#">272083</a> | Histone H2B type 1-L OS=Homo sapiens GN=HIST1H2BL PE=1 SV=3        |
| 1    | 25.83 | 97.5    | 12  | 1/25             | K109k          | (R) L L L P / G / E / L / A K / B / A / V / S E / G T / K (A) | 1763.0062                       | 114.0532                   | 5.5                         | 13989.3/10.31      | HUMAN   | <a href="#">Q99879</a> | <a href="#">272085</a> | Histone H2B type 1-M OS=Homo sapiens GN=HIST1H2BM PE=1 SV=3        |
| 1    | 25.83 | 97.5    | 12  | 1/25             | K109k          | (R) L L L P / G / E / L / A K / B / A / V / S E / G T / K (A) | 1763.0062                       | 114.0532                   | 5.5                         | 13922.2/10.31      | HUMAN   | <a href="#">Q99877</a> | <a href="#">272091</a> | Histone H2B type 1-N OS=Homo sapiens GN=HIST1H2BN PE=1 SV=3        |
| 1    | 25.83 | 97.5    | 12  | 1/25             | K109k          | (R) L L L P / G / E / L / A K / B / A / V / S E / G T / K (A) | 1763.0062                       | 114.0532                   | 5.5                         | 13906.2/10.31      | HUMAN   | <a href="#">P23527</a> | <a href="#">272093</a> | Histone H2B type 1-O OS=Homo sapiens GN=HIST1H2BO PE=1 SV=3        |
| 1    | 25.83 | 97.5    | 12  | 1/25             | K109k          | (R) L L L P / G / E / L / A K / B / A / V / S E / G T / K (A) | 1763.0062                       | 114.0532                   | 5.5                         | 13920.2/10.31      | HUMAN   | <a href="#">Q16778</a> | <a href="#">272153</a> | Histone H2B type 2-E OS=Homo sapiens GN=HIST2H2E PE=1 SV=3         |
| 1    | 25.83 | 97.5    | 12  | 1/25             | K109k          | (R) L L L P / G / E / L / A K / B / A / V / S E / G T / K (A) | 1763.0062                       | 114.0532                   | 5.5                         | 13920.2/10.31      | HUMAN   | <a href="#">Q5QNW6</a> | <a href="#">272159</a> | Histone H2B type 2-F OS=Homo sapiens GN=HIST2H2FB PE=1 SV=3        |
| 1    | 25.83 | 97.5    | 12  | 1/25             | K109k          | (R) L L L P / G / E / L / A K / B / A / V / S E / G T / K (A) | 1763.0062                       | 114.0532                   | 5.5                         | 13908.2/10.31      | HUMAN   | <a href="#">Q8N257</a> | <a href="#">272199</a> | Histone H2B type 3-B OS=Homo sapiens GN=HIST3H2BB PE=1 SV=3        |
| 1    | 25.83 | 97.5    | 12  | 1/25             | K109k          | (R) L L L P / G / E / L / A K / B / A / V / S E / G T / K (A) | 1763.0062                       | 114.0532                   | 5.5                         | 13944.3/10.37      | HUMAN   | <a href="#">P57053</a> | <a href="#">272295</a> | Histone H2B type F-S OS=Homo sapiens GN=H2BF5 PE=1 SV=2            |

| Fragment-ion (m/z)     | 70.064 | 84.080 | 86.096 | 87.098 | 110.070 | 129.101 | 130.085 | 147.111 | 155.081 | 199.179 | 227.174 | 284.124 | 305.180 | 397.207 | 613.272*3         | 521.257 | 550.966*3         | 571.304*2         | 620.324 | 627.845*2         | 691.361 | 692.361*2         | 720.876*2         | 769.404*2         | 828.421 |
|------------------------|--------|--------|--------|--------|---------|---------|---------|---------|---------|---------|---------|---------|---------|---------|-------------------|---------|-------------------|-------------------|---------|-------------------|---------|-------------------|-------------------|-------------------|---------|
| Frac. Inten.(% of TIC) | 0.01   | 0.28   | 35.23  | 2.49   | 0.07    | 0.10    | 2.61    | 2.32    | 2.99    | 9.30    | 3.98    | 2.90    | 2.27    | 1.41    | 11.41             | 2.69    | 3.38              | 1.92              | 2.09    | 1.47              | 1.45    | 1.55              | 3.28              | 2.79              | 2.00    |
| Rel. Inten.(% of BP)   | 0.04   | 0.79   | 100.00 | 7.06   | 0.19    | 0.29    | 7.41    | 6.58    | 8.50    | 26.39   | 11.30   | 8.23    | 6.45    | 4.01    | 32.39             | 7.63    | 9.60              | 5.45              | 5.93    | 4.18              | 4.11    | 4.41              | 9.31              | 7.92              | 5.66    |
| Score                  | 0.20   | 0.50   | 0.50   | -0.07  | 1.00    | 0.20    | 0.50    | 1.50    | 0.75    | 0.50    | 0.75    | 1.50    | 0.75    | 1.50    | 1.50              | 1.50    | 1.50              | 1.50              | 1.50    | 1.50              | 1.50    | 1.50              | 1.50              | 1.50              | 1.50    |
| Ion-type               | PR     | KQ     | a1     |        | H       | RKQ     | y1-NH3  | y1      | PG      | a2      | b2      | PGE     | y3      | PGEL    | y14 <sup>+3</sup> | y5      | y15 <sup>+3</sup> | y10 <sup>+2</sup> | y6      | y11 <sup>+2</sup> | y7      | y12 <sup>+2</sup> | y13 <sup>+2</sup> | y14 <sup>+2</sup> | y8      |
| Delta ppm              | -10.4  | -12.8  |        | 0.50   | -11.6   | -9.6    | -9.6    | -10.9   | -13.6   |         |         | -11.5   | -10.1   |         | -11.5             | -10.1   |                   |                   |         |                   |         |                   |                   |                   |         |

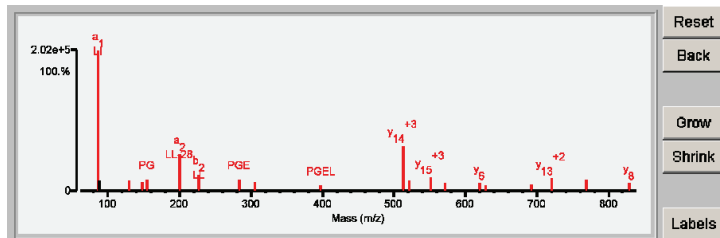

Reset

Back

Grow

Shrink

Labels

Result Summary

| Rank | Score | SPI (%) | BCS | # Unmatched Ions | Variable sites | Sequence                                           | MH <sup>+</sup> Calculated (Da) | MH <sup>+</sup> Error (Da) | MH <sup>+</sup> Error (ppm) | Protein MW/pl (Da) | Species | Accession #            | Protein Name                                                |
|------|-------|---------|-----|------------------|----------------|----------------------------------------------------|---------------------------------|----------------------------|-----------------------------|--------------------|---------|------------------------|-------------------------------------------------------------|
| 1    | 11.83 | 59.7    | 9   | 9/25             | K122k          | (K)H A V S E G T K A V T K / Y / T / S / S / K (-) | 1793.9392                       | 114.0510                   | 4.2                         | 14167.6/10.31      | HUMAN   | <a href="#">Q96A08</a> | Histone H2B type 1-A OS=Homo sapiens GN=HIST1H2BA PE=1 SV=3 |
| 1    | 11.83 | 59.7    | 9   | 9/25             | K121k          | (K)H A V S E G T K A V T K / Y / T / S / S / K (-) | 1793.9392                       | 114.0510                   | 4.2                         | 13950.3/10.31      | HUMAN   | <a href="#">P33778</a> | Histone H2B type 1-B OS=Homo sapiens GN=HIST1H2BB PE=1 SV=2 |
| 1    | 11.83 | 59.7    | 9   | 9/25             | K121k          | (K)H A V S E G T K A V T K / Y / T / S / S / K (-) | 1793.9392                       | 114.0510                   | 4.2                         | 13936.2/10.31      | HUMAN   | <a href="#">P58876</a> | Histone H2B type 1-D OS=Homo sapiens GN=HIST1H2BD PE=1 SV=2 |
| 1    | 11.83 | 59.7    | 9   | 9/25             | K121k          | (K)H A V S E G T K A V T K / Y / T / S / S / K (-) | 1793.9392                       | 114.0510                   | 4.2                         | 13892.2/10.31      | HUMAN   | <a href="#">Q93079</a> | Histone H2B type 1-H OS=Homo sapiens GN=HIST1H2BH PE=1 SV=3 |
| 1    | 11.83 | 59.7    | 9   | 9/25             | K121k          | (K)H A V S E G T K A V T K / Y / T / S / S / K (-) | 1793.9392                       | 114.0510                   | 4.2                         | 13952.3/10.31      | HUMAN   | <a href="#">Q99880</a> | Histone H2B type 1-L OS=Homo sapiens GN=HIST1H2BL PE=1 SV=3 |
| 1    | 11.83 | 59.7    | 9   | 9/25             | K121k          | (K)H A V S E G T K A V T K / Y / T / S / S / K (-) | 1793.9392                       | 114.0510                   | 4.2                         | 13989.3/10.31      | HUMAN   | <a href="#">Q99879</a> | Histone H2B type 1-M OS=Homo sapiens GN=HIST1H2BM PE=1 SV=3 |
| 1    | 11.83 | 59.7    | 9   | 9/25             | K121k          | (K)H A V S E G T K A V T K / Y / T / S / S / K (-) | 1793.9392                       | 114.0510                   | 4.2                         | 13922.2/10.31      | HUMAN   | <a href="#">Q99877</a> | Histone H2B type 1-N OS=Homo sapiens GN=HIST1H2BN PE=1 SV=3 |
| 1    | 11.83 | 59.7    | 9   | 9/25             | K121k          | (K)H A V S E G T K A V T K / Y / T / S / S / K (-) | 1793.9392                       | 114.0510                   | 4.2                         | 13906.2/10.31      | HUMAN   | <a href="#">P23527</a> | Histone H2B type 1-O OS=Homo sapiens GN=HIST1H2BO PE=1 SV=3 |
| 1    | 11.83 | 59.7    | 9   | 9/25             | K121k          | (K)H A V S E G T K A V T K / Y / T / S / S / K (-) | 1793.9392                       | 114.0510                   | 4.2                         | 13920.2/10.31      | HUMAN   | <a href="#">Q16778</a> | Histone H2B type 2-E OS=Homo sapiens GN=HIST2H2BE PE=1 SV=3 |
| 1    | 11.83 | 59.7    | 9   | 9/25             | K121k          | (K)H A V S E G T K A V T K / Y / T / S / S / K (-) | 1793.9392                       | 114.0510                   | 4.2                         | 13920.2/10.31      | HUMAN   | <a href="#">Q5QNW6</a> | Histone H2B type 2-F OS=Homo sapiens GN=HIST2H2BF PE=1 SV=3 |
| 1    | 11.83 | 59.7    | 9   | 9/25             | K121k          | (K)H A V S E G T K A V T K / Y / T / S / S / K (-) | 1793.9392                       | 114.0510                   | 4.2                         | 13908.2/10.31      | HUMAN   | <a href="#">Q8N257</a> | Histone H2B type 3-B OS=Homo sapiens GN=HIST3H2BB PE=1 SV=3 |
| 2    | 9.11  | 52.6    | 7   | 11/25            | K118k          | (K)H A V S E G T K A V T K / Y / T / S / S / K (-) | 1793.9392                       | 114.0510                   | 4.2                         | 14167.6/10.31      | HUMAN   | <a href="#">Q96A08</a> | Histone H2B type 1-A OS=Homo sapiens GN=HIST1H2BA PE=1 SV=3 |

Detailed Results

| Rank | Score | SPI (%) | BCS | # Unmatched Ions | Variable sites | Sequence                                            | MH <sup>+</sup> Calculated (Da) | MH <sup>+</sup> Error (Da) | MH <sup>+</sup> Error (ppm) | Protein MW/pl (Da) | Species | Accession #            | MS-Digest Index #      | Protein Name                                                |
|------|-------|---------|-----|------------------|----------------|-----------------------------------------------------|---------------------------------|----------------------------|-----------------------------|--------------------|---------|------------------------|------------------------|-------------------------------------------------------------|
| 1    | 11.83 | 59.7    | 9   | 9/25             | K122k          | (K) H A V S E G T K A V T K / Y / T / S / S / K (-) | 1793.9392                       | 114.0510                   | 4.2                         | 14167.6/10.31      | HUMAN   | <a href="#">Q96A08</a> | <a href="#">272051</a> | Histone H2B type 1-A OS=Homo sapiens GN=HIST1H2BA PE=1 SV=3 |
| 1    | 11.83 | 59.7    | 9   | 9/25             | K121k          | (K) H A V S E G T K A V T K / Y / T / S / S / K (-) | 1793.9392                       | 114.0510                   | 4.2                         | 13950.3/10.31      | HUMAN   | <a href="#">P33778</a> | <a href="#">272057</a> | Histone H2B type 1-B OS=Homo sapiens GN=HIST1H2BB PE=1 SV=2 |
| 1    | 11.83 | 59.7    | 9   | 9/25             | K121k          | (K) H A V S E G T K A V T K / Y / T / S / S / K (-) | 1793.9392                       | 114.0510                   | 4.2                         | 13936.2/10.31      | HUMAN   | <a href="#">P58876</a> | <a href="#">272065</a> | Histone H2B type 1-D OS=Homo sapiens GN=HIST1H2BD PE=1 SV=2 |
| 1    | 11.83 | 59.7    | 9   | 9/25             | K121k          | (K) H A V S E G T K A V T K / Y / T / S / S / K (-) | 1793.9392                       | 114.0510                   | 4.2                         | 13892.2/10.31      | HUMAN   | <a href="#">Q93079</a> | <a href="#">272069</a> | Histone H2B type 1-H OS=Homo sapiens GN=HIST1H2BH PE=1 SV=3 |
| 1    | 11.83 | 59.7    | 9   | 9/25             | K121k          | (K) H A V S E G T K A V T K / Y / T / S / S / K (-) | 1793.9392                       | 114.0510                   | 4.2                         | 13952.3/10.31      | HUMAN   | <a href="#">Q99880</a> | <a href="#">272083</a> | Histone H2B type 1-L OS=Homo sapiens GN=HIST1H2BL PE=1 SV=3 |
| 1    | 11.83 | 59.7    | 9   | 9/25             | K121k          | (K) H A V S E G T K A V T K / Y / T / S / S / K (-) | 1793.9392                       | 114.0510                   | 4.2                         | 13989.3/10.31      | HUMAN   | <a href="#">Q99879</a> | <a href="#">272085</a> | Histone H2B type 1-M OS=Homo sapiens GN=HIST1H2BM PE=1 SV=3 |
| 1    | 11.83 | 59.7    | 9   | 9/25             | K121k          | (K) H A V S E G T K A V T K / Y / T / S / S / K (-) | 1793.9392                       | 114.0510                   | 4.2                         | 13922.2/10.31      | HUMAN   | <a href="#">Q99877</a> | <a href="#">272091</a> | Histone H2B type 1-N OS=Homo sapiens GN=HIST1H2BN PE=1 SV=3 |
| 1    | 11.83 | 59.7    | 9   | 9/25             | K121k          | (K) H A V S E G T K A V T K / Y / T / S / S / K (-) | 1793.9392                       | 114.0510                   | 4.2                         | 13906.2/10.31      | HUMAN   | <a href="#">P23527</a> | <a href="#">272093</a> | Histone H2B type 1-O OS=Homo sapiens GN=HIST1H2BO PE=1 SV=3 |
| 1    | 11.83 | 59.7    | 9   | 9/25             | K121k          | (K) H A V S E G T K A V T K / Y / T / S / S / K (-) | 1793.9392                       | 114.0510                   | 4.2                         | 13920.2/10.31      | HUMAN   | <a href="#">Q16778</a> | <a href="#">272153</a> | Histone H2B type 2-E OS=Homo sapiens GN=HIST2H2BE PE=1 SV=3 |
| 1    | 11.83 | 59.7    | 9   | 9/25             | K121k          | (K) H A V S E G T K A V T K / Y / T / S / S / K (-) | 1793.9392                       | 114.0510                   | 4.2                         | 13920.2/10.31      | HUMAN   | <a href="#">Q5QNW6</a> | <a href="#">272159</a> | Histone H2B type 2-F OS=Homo sapiens GN=HIST2H2BF PE=1 SV=3 |
| 1    | 11.83 | 59.7    | 9   | 9/25             | K121k          | (K) H A V S E G T K A V T K / Y / T / S / S / K (-) | 1793.9392                       | 114.0510                   | 4.2                         | 13908.2/10.31      | HUMAN   | <a href="#">Q8N257</a> | <a href="#">272199</a> | Histone H2B type 3-B OS=Homo sapiens GN=HIST3H2BB PE=1 SV=3 |

  

| Fragment-ion (m/z)     | 60.044 | 72.082 | 74.061 | 84.081 | 85.085 | 102.058 | 110.068 | 129.100 | 136.070 | 181.112 | 209.100 | 234.139 | 321.177 | 377.200 | 385.710 <sup>+2</sup> | 416.544 | 422.224 | 441.226 | 449.493 <sup>+2</sup> | 462.582 | 518.787 | 549.794 | 562.805 <sup>+2</sup> | 585.293 | 664.346 <sup>+2</sup> |                   |
|------------------------|--------|--------|--------|--------|--------|---------|---------|---------|---------|---------|---------|---------|---------|---------|-----------------------|---------|---------|---------|-----------------------|---------|---------|---------|-----------------------|---------|-----------------------|-------------------|
| Frac. Inten.(% of TIC) | 3.38   | 0.14   | 4.57   | 0.66   | 5.63   | 0.12    | 0.51    | 0.48    | 7.74    | 6.18    | 3.98    | 4.75    | 9.79    | 4.67    | 3.95                  | 3.71    | 7.26    | 3.26    | 3.88                  | 5.33    | 3.28    | 3.80    | 3.43                  | 6.29    | 3.20                  |                   |
| Rel. Inten.(% of BP)   | 34.50  | 1.43   | 46.67  | 6.75   | 57.48  | 1.19    | 5.20    | 4.95    | 79.07   | 63.08   | 40.61   | 48.53   | 100.00  | 47.65   | 40.37                 | 37.90   | 74.17   | 33.29   | 39.58                 | 54.45   | 33.47   | 38.79   | 35.01                 | 64.20   | 32.68                 |                   |
| Score                  | -0.34  | 0.50   | 1.50   | 0.50   | -0.57  | 1.00    | 1.00    | 0.20    | -0.79   | 0.50    | 0.50    | 1.50    | 1.50    | 0.25    | -0.40                 | -0.38   | 1.50    | 0.50    | -0.40                 | -0.54   | -0.33   | 1.50    | -0.35                 | 1.50    | 1.50                  |                   |
| Ion-type               |        | V      | y++1   | KQ     |        | E       | a1      | RKQ     |         | a2      | b2      | y2      | y3      | b4-H2O  |                       |         | y4      | b+++g   |                       |         |         | y++g    |                       |         | y5                    | y11 <sup>+2</sup> |
| Delta ppm              |        | 22.5   | 17.0   | -3.3   |        | 31.8    | -38.8   | -15.0   |         | 16.1    | -23.4   |         | 1.1     | 14.1    |                       |         | -0.8    | -5.1    |                       |         |         | 1.6     |                       |         | 9.5                   | -28.2             |

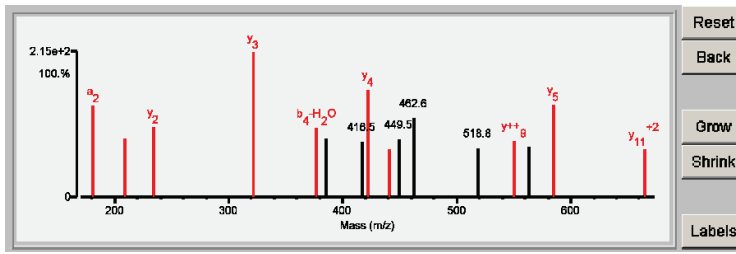

Reset

Back

Grow

Shrink

Labels

Result Summary

| Rank | Score | SPI (%) | BCS | # Unmatched Ions | Variable sites | Sequence           | MH <sup>+</sup> Calculated (Da) | MH <sup>+</sup> Error (Da) | MH <sup>+</sup> Error (ppm) | Protein MW/pl (Da) | Species | Accession # | Protein Name                                       |
|------|-------|---------|-----|------------------|----------------|--------------------|---------------------------------|----------------------------|-----------------------------|--------------------|---------|-------------|----------------------------------------------------|
| 1    | 11.49 | 66.2    | 7   | 10/24            | K123k          | (R)VTIMPkDIQLAR(R) | 1384.7981                       | 114.0544                   | 7.6                         | 15508.3/11.13      | HUMAN   | Q16695      | Histone H3.1t OS=Homo sapiens GN=HIST3H3 PE=1 SV=3 |
| 1    | 11.49 | 66.2    | 7   | 10/24            | K123k          | (R)VTIMPkDIQLAR(R) | 1384.7981                       | 114.0544                   | 7.6                         | 15404.2/11.13      | HUMAN   | P68431      | Histone H3.1 OS=Homo sapiens GN=HIST1H3A PE=1 SV=2 |
| 1    | 11.49 | 66.2    | 7   | 10/24            | K123k          | (R)VTIMPkDIQLAR(R) | 1384.7981                       | 114.0544                   | 7.6                         | 15388.1/11.27      | HUMAN   | Q71D13      | Histone H3.2 OS=Homo sapiens GN=HIST2H3A PE=1 SV=3 |
| 1    | 11.49 | 66.2    | 7   | 10/24            | K123k          | (R)VTIMPkDIQLAR(R) | 1384.7981                       | 114.0544                   | 7.6                         | 15328.0/11.27      | HUMAN   | P84243      | Histone H3.3 OS=Homo sapiens GN=H3F3A PE=1 SV=2    |
| 1    | 11.49 | 66.2    | 7   | 10/24            | K122k          | (R)VTIMPkDIQLAR(R) | 1384.7981                       | 114.0544                   | 7.6                         | 15213.8/11.11      | HUMAN   | Q6NXT2      | Histone H3-like OS=Homo sapiens PE=2 SV=3          |

Detailed Results

| Rank | Score | SPI (%) | BCS | # Unmatched Ions | Variable sites | Sequence                        | MH <sup>+</sup> Calculated (Da) | MH <sup>+</sup> Error (Da) | MH <sup>+</sup> Error (ppm) | Protein MW/pl (Da) | Species | Accession # | MS-Digest Index # | Protein Name                                       |
|------|-------|---------|-----|------------------|----------------|---------------------------------|---------------------------------|----------------------------|-----------------------------|--------------------|---------|-------------|-------------------|----------------------------------------------------|
| 1    | 11.49 | 66.2    | 7   | 10/24            | K123k          | (R) V T\I/M/P k/D/I Q L/A/R (R) | 1384.7981                       | 114.0544                   | 7.6                         | 15508.3/11.13      | HUMAN   | Q16695      | 272455            | Histone H3.1t OS=Homo sapiens GN=HIST3H3 PE=1 SV=3 |
| 1    | 11.49 | 66.2    | 7   | 10/24            | K123k          | (R) V T\I/M/P k/D/I Q L/A/R (R) | 1384.7981                       | 114.0544                   | 7.6                         | 15404.2/11.13      | HUMAN   | P68431      | 272467            | Histone H3.1 OS=Homo sapiens GN=HIST1H3A PE=1 SV=2 |
| 1    | 11.49 | 66.2    | 7   | 10/24            | K123k          | (R) V T\I/M/P k/D/I Q L/A/R (R) | 1384.7981                       | 114.0544                   | 7.6                         | 15388.1/11.27      | HUMAN   | Q71D13      | 272515            | Histone H3.2 OS=Homo sapiens GN=HIST2H3A PE=1 SV=3 |
| 1    | 11.49 | 66.2    | 7   | 10/24            | K123k          | (R) V T\I/M/P k/D/I Q L/A/R (R) | 1384.7981                       | 114.0544                   | 7.6                         | 15328.0/11.27      | HUMAN   | P84243      | 272631            | Histone H3.3 OS=Homo sapiens GN=H3F3A PE=1 SV=2    |
| 1    | 11.49 | 66.2    | 7   | 10/24            | K122k          | (R) V T\I/M/P k/D/I Q L/A/R (R) | 1384.7981                       | 114.0544                   | 7.6                         | 15213.8/11.11      | HUMAN   | Q6NXT2      | 272715            | Histone H3-like OS=Homo sapiens PE=2 SV=3          |

  

| Fragment-Ion (m/z)      | 70.064 | 72.080 | 84.080 | 86.096 | 104.051 | 128.106 | 138.088 | 169.133 | 173.127 | 175.117 | 187.137 | 195.188 | 201.120 | 223.176 | 232.138 | 246.155 | 296.197 | 357.192 | 397.217 | 527.805 <sup>+2</sup> | 593.321 <sup>+2</sup> | 600.399 | 715.418 | 1054.609 |  |
|-------------------------|--------|--------|--------|--------|---------|---------|---------|---------|---------|---------|---------|---------|---------|---------|---------|---------|---------|---------|---------|-----------------------|-----------------------|---------|---------|----------|--|
| Frac. Inten. (% of TIC) | 0.01   | 0.42   | 0.34   | 0.22   | 2.38    | 7.83    | 4.57    | 4.56    | 3.73    | 3.40    | 2.42    | 5.30    | 5.03    | 2.66    | 2.24    | 3.13    | 4.29    | 2.90    | 3.52    | 22.85                 | 2.18                  | 2.66    | 7.20    | 6.17     |  |
| Rel. Inten. (% of BP)   | 0.03   | 1.85   | 1.47   | 0.95   | 10.40   | 34.24   | 20.02   | 19.95   | 16.31   | 14.87   | 10.59   | 23.18   | 22.02   | 11.62   | 9.78    | 13.71   | 18.78   | 12.70   | 15.41   | 100.00                | 9.54                  | 11.63   | 31.50   | 27.00    |  |
| Score                   | 0.20   | 0.50   | 0.50   | 0.22   | -0.10   | -0.34   | -0.20   | -0.20   | 0.50    | 1.50    | -0.11   | -0.23   | 0.50    | -0.12   | -0.10   | 1.50    | 0.25    | -0.13   | -0.15   | 1.50                  | 1.50                  | 1.50    | 1.50    | 1.50     |  |
| Ion-type                | PR     | a1     | KQ     | LI     |         |         |         |         | a2      | y1      |         |         | b2      |         | y2      | b3-H2O  |         |         |         | y8 <sup>+2</sup>      | y9 <sup>+2</sup>      | y5      | y6      | y8       |  |
| Delta ppm               | -11.8  | -26.0  | -14.0  | -9.6   |         |         |         |         | -14.2   | -13.4   |         |         | -24.2   |         |         | -4.3    | -4.6    |         |         | 1.9                   | -5.8                  | 27.4    | 11.6    | 8.2      |  |
| V                       |        | 0.50   |        |        |         |         |         |         |         |         |         |         |         |         |         |         |         |         |         |                       |                       |         |         |          |  |
|                         |        | -10.8  |        |        |         |         |         |         |         |         |         |         |         |         |         |         |         |         |         |                       |                       |         |         |          |  |

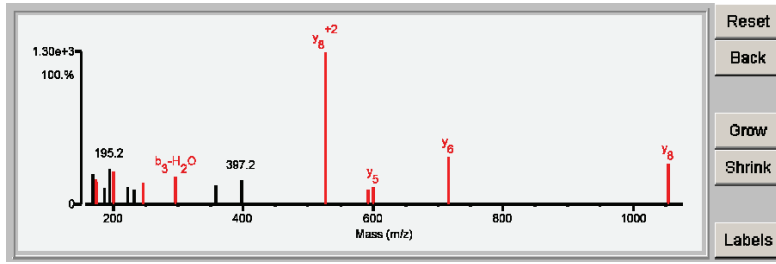

Result Summary

| Rank | Score | SPI (%) | BCS | # Unmatched Ions | Variable sites | Sequence         | MH <sup>+</sup> Calculated (Da) | MH <sup>+</sup> Error (Da) | MH <sup>+</sup> Error (ppm) | Protein MW/pl (Da) | Species | Accession #            | Protein Name                                       |
|------|-------|---------|-----|------------------|----------------|------------------|---------------------------------|----------------------------|-----------------------------|--------------------|---------|------------------------|----------------------------------------------------|
| 1    | 15.12 | 78.0    | 8   | 6/25             | K57k           | (R)YQkSTELLIR(K) | 1250.7103                       | 114.0514                   | 6.2                         | 15508.3/11.13      | HUMAN   | <a href="#">Q16695</a> | Histone H3.1t OS=Homo sapiens GN=HIST3H3 PE=1 SV=3 |
| 1    | 15.12 | 78.0    | 8   | 6/25             | K57k           | (R)YQkSTELLIR(K) | 1250.7103                       | 114.0514                   | 6.2                         | 15404.2/11.13      | HUMAN   | <a href="#">P68431</a> | Histone H3.1 OS=Homo sapiens GN=HIST1H3A PE=1 SV=2 |
| 1    | 15.12 | 78.0    | 8   | 6/25             | K57k           | (R)YQkSTELLIR(K) | 1250.7103                       | 114.0514                   | 6.2                         | 15388.1/11.27      | HUMAN   | <a href="#">Q71D13</a> | Histone H3.2 OS=Homo sapiens GN=HIST2H3A PE=1 SV=3 |
| 1    | 15.12 | 78.0    | 8   | 6/25             | K57k           | (R)YQkSTELLIR(K) | 1250.7103                       | 114.0514                   | 6.2                         | 15328.0/11.27      | HUMAN   | <a href="#">P84243</a> | Histone H3.3 OS=Homo sapiens GN=H3F3A PE=1 SV=2    |
| 1    | 15.12 | 78.0    | 8   | 6/25             | K56k           | (R)YQkSTELLIR(K) | 1250.7103                       | 114.0514                   | 6.2                         | 15213.8/11.11      | HUMAN   | <a href="#">Q6NXT2</a> | Histone H3-like OS=Homo sapiens PE=2 SV=3          |

Detailed Results

| Rank | Score | SPI (%) | BCS | # Unmatched Ions | Variable sites | Sequence                 | MH <sup>+</sup> Calculated (Da) | MH <sup>+</sup> Error (Da) | MH <sup>+</sup> Error (ppm) | Protein MW/pl (Da) | Species | Accession #            | MS-Digest Index #      | Protein Name                                       |
|------|-------|---------|-----|------------------|----------------|--------------------------|---------------------------------|----------------------------|-----------------------------|--------------------|---------|------------------------|------------------------|----------------------------------------------------|
| 1    | 15.12 | 78.0    | 8   | 6/25             | K57k           | (R)YQ\k/S/T/E/L/L/I/R(K) | 1250.7103                       | 114.0514                   | 6.2                         | 15508.3/11.13      | HUMAN   | <a href="#">Q16695</a> | <a href="#">272455</a> | Histone H3.1t OS=Homo sapiens GN=HIST3H3 PE=1 SV=3 |
| 1    | 15.12 | 78.0    | 8   | 6/25             | K57k           | (R)YQ\k/S/T/E/L/L/I/R(K) | 1250.7103                       | 114.0514                   | 6.2                         | 15404.2/11.13      | HUMAN   | <a href="#">P68431</a> | <a href="#">272467</a> | Histone H3.1 OS=Homo sapiens GN=HIST1H3A PE=1 SV=2 |
| 1    | 15.12 | 78.0    | 8   | 6/25             | K57k           | (R)YQ\k/S/T/E/L/L/I/R(K) | 1250.7103                       | 114.0514                   | 6.2                         | 15388.1/11.27      | HUMAN   | <a href="#">Q71D13</a> | <a href="#">272515</a> | Histone H3.2 OS=Homo sapiens GN=HIST2H3A PE=1 SV=3 |
| 1    | 15.12 | 78.0    | 8   | 6/25             | K57k           | (R)YQ\k/S/T/E/L/L/I/R(K) | 1250.7103                       | 114.0514                   | 6.2                         | 15328.0/11.27      | HUMAN   | <a href="#">P84243</a> | <a href="#">272631</a> | Histone H3.3 OS=Homo sapiens GN=H3F3A PE=1 SV=2    |
| 1    | 15.12 | 78.0    | 8   | 6/25             | K56k           | (R)YQ\k/S/T/E/L/L/I/R(K) | 1250.7103                       | 114.0514                   | 6.2                         | 15213.8/11.11      | HUMAN   | <a href="#">Q6NXT2</a> | <a href="#">272715</a> | Histone H3-like OS=Homo sapiens PE=2 SV=3          |

  

| Fragment-ion (m/z)      | 70.065 | 84.044 | 84.080 | 86.096 | 87.055 | 91.054 | 102.054 | 129.102 | 136.075 | 137.080 | 141.101 | 156.109 | 158.091 | 175.119 | 181.096 | 199.180 | 271.176 | 288.202 | 292.132 | 401.287 | 514.372 | 625.409 | 643.414 | 744.466 | 831.499 |
|-------------------------|--------|--------|--------|--------|--------|--------|---------|---------|---------|---------|---------|---------|---------|---------|---------|---------|---------|---------|---------|---------|---------|---------|---------|---------|---------|
| Frac. Inten. (% of TIC) | 0.00   | 0.14   | 0.63   | 0.95   | 0.13   | 3.45   | 0.10    | 0.10    | 0.93    | 2.96    | 3.59    | 2.44    | 2.76    | 13.19   | 5.81    | 3.79    | 4.58    | 8.65    | 2.78    | 16.53   | 14.21   | 2.29    | 4.99    | 2.32    | 2.67    |
| Rel. Inten. (% of BP)   | 0.01   | 0.82   | 3.82   | 5.76   | 0.80   | 20.90  | 0.64    | 0.62    | 5.64    | 17.93   | 21.75   | 14.75   | 16.69   | 79.84   | 35.14   | 22.91   | 27.69   | 52.35   | 16.82   | 100.00  | 86.00   | 13.86   | 30.18   | 14.02   | 16.18   |
| Score                   | 0.20   | 1.00   | 0.50   | 0.22   | 0.33   | -0.21  |         | 0.20    | 1.00    | -0.18   | -0.22   |         | 0.50    | 1.50    | -0.35   |         | 0.50    | 1.50    | 0.50    | 1.50    | 0.50    | 1.50    | 1.50    | 1.50    | 1.50    |
| Ion-type                | PR     | E      | KQ     | LI     | NR     |        | E       | RKQ     | a1      |         |         |         | y1-NH3  | y1      |         |         | y2-NH3  | y2      | b2      | y3      | y4      | y5-H2O  | y5      | y6      | y7      |
| Delta ppm               | -3.2   | -9.4   | -12.8  | -8.4   | -5.6   |        |         | -5.0    | -16.8   |         |         |         | -10.1   | -1.4    |         |         | -3.6    | -2.5    | 4.9     | -0.2    | 1.7     | 10.0    | 1.2     | 6.6     | 6.6     |

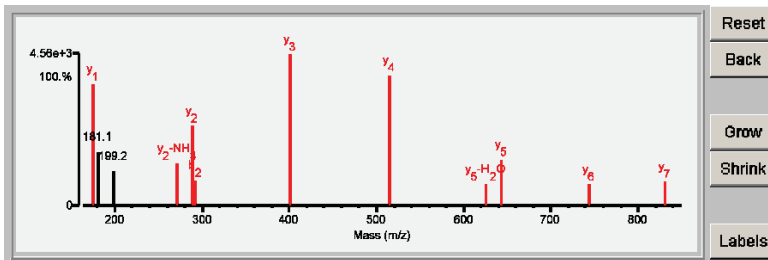

Result Summary

| Rank | Score | SPI (%) | BCS | # Unmatched ions | Variable sites | Sequence          | MH <sup>+</sup> Calculated (Da) | MH <sup>+</sup> Error (Da) | MH <sup>+</sup> Error (ppm) | Protein MW/pI (Da) | Species | Accession #             | Protein Name                                                               |
|------|-------|---------|-----|------------------|----------------|-------------------|---------------------------------|----------------------------|-----------------------------|--------------------|---------|-------------------------|----------------------------------------------------------------------------|
| 1    | 16.85 | 75.2    | 8   | 6/25             | K80k           | (R)EIAQDFKTDLR(F) | 1335.6903                       | 114.0521                   | 6.4                         | 15508.3/11.13      | HUMAN   | <a href="#">Q16695</a>  | Histone H3.11 OS=Homo sapiens GN=HIST3H3 PE=1 SV=3                         |
| 1    | 16.85 | 75.2    | 8   | 6/25             | K80k           | (R)EIAQDFKTDLR(F) | 1335.6903                       | 114.0521                   | 6.4                         | 15404.2/11.13      | HUMAN   | <a href="#">P68431</a>  | Histone H3.1 OS=Homo sapiens GN=HIST1H3A PE=1 SV=2                         |
| 1    | 16.85 | 75.2    | 8   | 6/25             | K80k           | (R)EIAQDFKTDLR(F) | 1335.6903                       | 114.0521                   | 6.4                         | 15388.1/11.27      | HUMAN   | <a href="#">Q71D13</a>  | Histone H3.2 OS=Homo sapiens GN=HIST2H3A PE=1 SV=3                         |
| 1    | 16.85 | 75.2    | 8   | 6/25             | K80k           | (R)EIAQDFKTDLR(F) | 1335.6903                       | 114.0521                   | 6.4                         | 15328.0/11.27      | HUMAN   | <a href="#">P84243</a>  | Histone H3.3 OS=Homo sapiens GN=H3F3A PE=1 SV=2                            |
| 2    | 8.49  | 51.8    | 4   | 12/25            | None           | (R)EEEGKLTDLR(S)  | 1449.7584                       | -0.0159                    | -11.0                       | 133504.9/5.87      | HUMAN   | <a href="#">RQ66GS9</a> | REVERSE Centrosomal protein of 135 kDa OS=Homo sapiens GN=CEP135 PE=1 SV=1 |

Detailed Results

| Rank | Score | SPI (%) | BCS | # Unmatched ions | Variable sites | Sequence                     | MH <sup>+</sup> Calculated (Da) | MH <sup>+</sup> Error (Da) | MH <sup>+</sup> Error (ppm) | Protein MW/pI (Da) | Species | Accession #            | MS-Digest Index #      | Protein Name                                       |
|------|-------|---------|-----|------------------|----------------|------------------------------|---------------------------------|----------------------------|-----------------------------|--------------------|---------|------------------------|------------------------|----------------------------------------------------|
| 1    | 16.85 | 75.2    | 8   | 6/25             | K80k           | (R)E I/A Q/D/F/K/T/D/L/R (F) | 1335.6903                       | 114.0521                   | 6.4                         | 15508.3/11.13      | HUMAN   | <a href="#">Q16695</a> | <a href="#">272455</a> | Histone H3.11 OS=Homo sapiens GN=HIST3H3 PE=1 SV=3 |
| 1    | 16.85 | 75.2    | 8   | 6/25             | K80k           | (R)E I/A Q/D/F/K/T/D/L/R (F) | 1335.6903                       | 114.0521                   | 6.4                         | 15404.2/11.13      | HUMAN   | <a href="#">P68431</a> | <a href="#">272467</a> | Histone H3.1 OS=Homo sapiens GN=HIST1H3A PE=1 SV=2 |
| 1    | 16.85 | 75.2    | 8   | 6/25             | K80k           | (R)E I/A Q/D/F/K/T/D/L/R (F) | 1335.6903                       | 114.0521                   | 6.4                         | 15388.1/11.27      | HUMAN   | <a href="#">Q71D13</a> | <a href="#">272515</a> | Histone H3.2 OS=Homo sapiens GN=HIST2H3A PE=1 SV=3 |
| 1    | 16.85 | 75.2    | 8   | 6/25             | K80k           | (R)E I/A Q/D/F/K/T/D/L/R (F) | 1335.6903                       | 114.0521                   | 6.4                         | 15328.0/11.27      | HUMAN   | <a href="#">P84243</a> | <a href="#">272631</a> | Histone H3.3 OS=Homo sapiens GN=H3F3A PE=1 SV=2    |

| Fragment-ion (m/z)     | 84.043 | 84.080 | 86.096 | 87.055 | 89.070 | 102.054 | 120.079 | 129.065 | 129.099 | 141.101 | 175.118 | 197.129 | 200.102 | 215.138 | 288.203 | 289.206 | 298.100 | 315.128 | 345.195 <sup>+2</sup> | 403.227 | 504.279 | 604.314 <sup>+2</sup> | 746.418 | 893.474 | 1008.516 |
|------------------------|--------|--------|--------|--------|--------|---------|---------|---------|---------|---------|---------|---------|---------|---------|---------|---------|---------|---------|-----------------------|---------|---------|-----------------------|---------|---------|----------|
| Frac. Inten.(% of TIC) | 0.20   | 0.57   | 0.42   | 0.06   | 4.96   | 0.06    | 0.15    | 0.19    | 0.08    | 2.16    | 6.77    | 10.06   | 3.71    | 9.21    | 27.28   | 3.37    | 2.16    | 2.81    | 2.07                  | 3.41    | 9.81    | 2.05                  | 2.83    | 2.36    | 3.24     |
| Rel. Inten.(% of BP)   | 0.74   | 2.10   | 1.54   | 0.23   | 18.19  | 0.24    | 0.54    | 0.69    | 0.30    | 7.92    | 24.83   | 36.88   | 13.60   | 33.75   | 100.00  | 12.36   | 7.90    | 10.32   | 7.61                  | 12.51   | 35.95   | 7.52                  | 10.37   | 8.66    | 11.88    |
| Score                  | 1.00   | 0.50   | 0.22   | 0.33   | -0.18  | 1.00    | 0.20    | 0.20    | 0.30    | 7.92    | 24.83   | 36.88   | 13.60   | 33.75   | 100.00  | 12.36   | 7.90    | 10.32   | 7.61                  | 12.51   | 35.95   | 7.52                  | 10.37   | 8.66    | 11.88    |
| Ion-type               | E      | KQ     | LI     | NR     |        | 81      | F       | QKR     | QKR     |         | y1      | aq      | az      | y2      |         |         |         | QAD     |                       | y3      | y4      | y9 <sup>+2</sup>      | y5      | y6      | y7       |
| Delta ppm              | -13.0  | -8.0   | -7.3   | -7.9   |        | -21.1   | -11.5   | -9.7    |         |         | -4.3    |         | -8.8    | -10.3   | -0.7    |         |         | -9.2    |                       | -6.3    | 2.7     | 12.0                  | 3.3     | -11.2   | 4.6      |

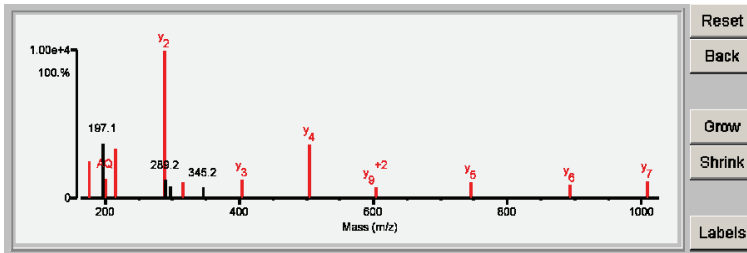

Result Summary

| Rank | Score | SPI (%) | BCS | # Unmatched ions | Variable sites | Sequence            | MH <sup>+</sup> Calculated (Da) | MH <sup>+</sup> Error (Da) | MH <sup>+</sup> Error (ppm) | Protein MW/pl (Da) | Species | Accession # | Protein Name                                                                        |
|------|-------|---------|-----|------------------|----------------|---------------------|---------------------------------|----------------------------|-----------------------------|--------------------|---------|-------------|-------------------------------------------------------------------------------------|
| 1    | 15.91 | 85.5    | 7   | 5/25             | K32k           | (R)DNIIQGITKPAIR(R) | 1325.7536                       | 114.0625                   | 13.6                        | 11367.4/11.36      | HUMAN   | P62805      | Histone H4 OS=Homo sapiens GN=HIST1H4A PE=1 SV=2                                    |
| 2    | 6.84  | 54.1    | 2   | 14/25            | None           | (R)EHYWEVKLPAR(M)   | 1439.8005                       | 0.0155                     | 10.8                        | 104738.6/5.87      | HUMAN   | O15327      | Type II inositol-3,4-bisphosphate 4-phosphatase OS=Homo sapiens GN=INPP4B PE=2 SV=4 |

Detailed Results

| Rank | Score | SPI (%) | BCS | # Unmatched ions | Variable sites | Sequence            | MH <sup>+</sup> Calculated (Da) | MH <sup>+</sup> Error (Da) | MH <sup>+</sup> Error (ppm) | Protein MW/pl (Da) | Species | Accession # | MS-Digest Index # | Protein Name                                     |
|------|-------|---------|-----|------------------|----------------|---------------------|---------------------------------|----------------------------|-----------------------------|--------------------|---------|-------------|-------------------|--------------------------------------------------|
| 1    | 15.91 | 85.5    | 7   | 5/25             | K32k           | (R)DNIIQGITKPAIR(R) | 1325.7536                       | 114.0625                   | 13.6                        | 11367.4/11.36      | HUMAN   | P62805      | 136470            | Histone H4 OS=Homo sapiens GN=HIST1H4A PE=1 SV=2 |

  

| Fragment-ion (m/z)      | 70.065 | 84.043 | 84.081 | 86.096 | 88.038 | 141.100 | 143.116 | 169.098 | 175.120 | 185.057 | 195.041 | 212.066 | 213.051 | 228.649 | 230.077 | 298.142 | 299.172 | 343.162 | 349.725*2 | 359.240 | 400.250*2 | 439.267 | 456.296  | 540.317*2 | 799.489 |
|-------------------------|--------|--------|--------|--------|--------|---------|---------|---------|---------|---------|---------|---------|---------|---------|---------|---------|---------|---------|-----------|---------|-----------|---------|----------|-----------|---------|
| Frac. Inten. (% of TIC) | 0.01   | 2.43   | 0.71   | 0.62   | 4.48   | 2.71    | 3.40    | 3.18    | 7.10    | 3.76    | 2.28    | 2.28    | 3.39    | 2.18    | 7.39    | 2.67    | 2.15    | 3.19    | 2.19      | 2.32    | 2.23      | 3.07    | 28.35    | 4.87      | 3.05    |
| Rel. Inten. (% of BP)   | 0.02   | 8.58   | 2.49   | 2.20   | 15.81  | 9.57    | 11.98   | 11.22   | 25.04   | 13.25   | 8.06    | 8.05    | 11.94   | 7.68    | 26.06   | 9.41    | 7.57    | 11.26   | 7.71      | 8.17    | 7.86      | 10.82   | 100.00   | 17.16     | 10.76   |
| Score                   | 0.20   | -0.09  | 0.50   | 0.22   | 0.50   | 0.50    | -0.12   | 0.75    | 1.50    | -0.13   | -0.08   | 0.25    | 0.25    | 1.50    | 0.50    | 0.75    | 0.50    | 1.50    | 1.50      | 1.50    | 0.50      | 1.50    | 0.50     | 1.50      | 1.50    |
| Ion-type                | PR     | KQ     | LI     | LI     | a1     | PA-28   | PA      | YI      | YI      | YI      | b2-H2O  | b2-NH3  | Y4+4    | b2      | QGI     | b3      | Y3      | Y5      | Y6        | Y6      | Y4-NH3    | Y4      | Y9+H2O+2 | Y6        | Y6      |
| Delta ppm               | -0.4   |        | 0.3    | -6.1   | -23.9  | -23.6   |         | -2.7    | 8.3     |         |         | -8.4    | -2.8    | -2.6    | -5.4    | -2.3    | -1.2    | -1.2    | 16.5      | 0.8     | 18.8      | 0.6     | 6.4      | -5.3      | 13.3    |

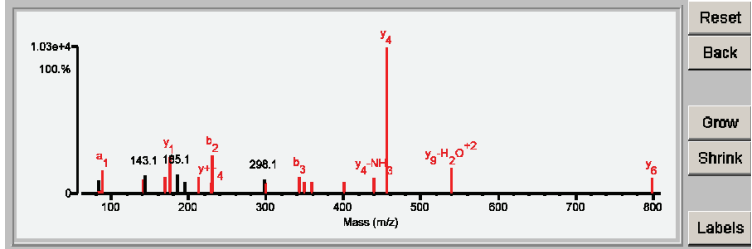

Result Summary

| Rank | Score | SP1 (%) | BCS | # Unmatched Ions | Variable sites | Sequence           | MH <sup>+</sup> Calculated (Da) | MH <sup>+</sup> Error (Da) | MH <sup>+</sup> Error (ppm) | Protein MW (Da) | Species | Accession # | Protein Name                                                                                       |
|------|-------|---------|-----|------------------|----------------|--------------------|---------------------------------|----------------------------|-----------------------------|-----------------|---------|-------------|----------------------------------------------------------------------------------------------------|
| 1    | 17.47 | 71.9    | 7   | 4/25             | K60k           | (R)GVLVFLNVIR(D)   | 1386.8467                       | 114.0550                   | 8.0                         | 11367.4/11.36   | HUMAN   | P62805      | Histone H4 OS=Homo sapiens GN=HIST1H4A PE=1 SV=2                                                   |
| 2    | 6.67  | 50.1    | 3   | 9/25             | None           | (K)RINVELSTKGGK(G) | 1500.8857                       | 0.0161                     | 10.7                        | 69492.0/9.68    | HUMAN   | Q86PK6      | RNA-binding protein 14 OS=Homo sapiens GN=RBM14 PE=1 SV=2                                          |
| 3    | 6.66  | 59.0    | 3   | 11/25            | K571k          | (R)KNLLKEMKVKR(S)  | 1386.8614                       | 114.0404                   | -1.7                        | 73675.4/9.73    | HUMAN   | A6PVS8      | Leucine-rich repeat and IQ domain-containing protein 3 OS=Homo sapiens GN=LRRIQ3 PE=2 SV=1         |
| 4    | 6.11  | 58.2    | 2   | 11/25            | K54k           | (R)VKKMEKLLNKR(Y)  | 1386.8614                       | 114.0404                   | -1.7                        | 73675.4/9.73    | HUMAN   | R46PVS8     | REVERSE Leucine-rich repeat and IQ domain-containing protein 3 OS=Homo sapiens GN=LRRIQ3 PE=2 SV=1 |
| 5    | 3.67  | 51.4    | 3   | 11/25            | K186k K188k    | (K)QASKSKLVKVR(Q)  | 1272.8110                       | 228.0907                   | 3.2                         | 25631.9/10.95   | HUMAN   | P60008      | Spermatid-specific linker histone H1-like protein OS=Homo sapiens GN=HLS1 PE=1 SV=1                |

Detailed Results

| Rank                                                                                                                                                                                                                                                                                                                                                                                                                                                                                                                                                                                                                                                                                                                                                                                                                                                                                                                                                                                                                                                                                                                                                                                                                                                                                                                                                                                                                                                                                                                                                                                                                                                                                                                                                                                                                                                                                                                                                                                                                                                                                                                                                                                                                                                                                                                                                                                                                                                                                                                        | Score  | SP1 (%) | BCS    | # Unmatched Ions | Variable sites | Sequence         | MH <sup>+</sup> Calculated (Da) | MH <sup>+</sup> Error (Da)      | MH <sup>+</sup> Error (ppm) | Protein MW (Da) | Species | Accession # | MS-Digest Index # | Protein Name                                     |                    |         |         |         |         |         |         |         |         |         |         |         |         |         |         |         |         |         |         |         |         |         |         |         |         |         |                         |      |       |      |      |      |      |       |      |      |      |      |      |      |      |      |      |      |      |      |      |      |      |      |      |      |                       |      |        |      |      |      |      |       |       |      |      |       |      |       |       |      |       |       |      |       |       |       |      |       |       |       |       |      |       |      |      |      |      |      |       |      |      |       |       |      |      |      |      |      |      |      |      |      |      |      |      |      |          |   |    |    |   |   |                |                |                                 |                |  |  |  |  |  |  |  |  |  |  |  |  |  |  |  |  |           |       |  |      |      |       |       |       |      |       |      |      |  |  |     |      |      |     |      |      |       |     |       |     |     |      |
|-----------------------------------------------------------------------------------------------------------------------------------------------------------------------------------------------------------------------------------------------------------------------------------------------------------------------------------------------------------------------------------------------------------------------------------------------------------------------------------------------------------------------------------------------------------------------------------------------------------------------------------------------------------------------------------------------------------------------------------------------------------------------------------------------------------------------------------------------------------------------------------------------------------------------------------------------------------------------------------------------------------------------------------------------------------------------------------------------------------------------------------------------------------------------------------------------------------------------------------------------------------------------------------------------------------------------------------------------------------------------------------------------------------------------------------------------------------------------------------------------------------------------------------------------------------------------------------------------------------------------------------------------------------------------------------------------------------------------------------------------------------------------------------------------------------------------------------------------------------------------------------------------------------------------------------------------------------------------------------------------------------------------------------------------------------------------------------------------------------------------------------------------------------------------------------------------------------------------------------------------------------------------------------------------------------------------------------------------------------------------------------------------------------------------------------------------------------------------------------------------------------------------------|--------|---------|--------|------------------|----------------|------------------|---------------------------------|---------------------------------|-----------------------------|-----------------|---------|-------------|-------------------|--------------------------------------------------|--------------------|---------|---------|---------|---------|---------|---------|---------|---------|---------|---------|---------|---------|---------|---------|---------|---------|---------|---------|---------|---------|---------|---------|---------|---------|---------|-------------------------|------|-------|------|------|------|------|-------|------|------|------|------|------|------|------|------|------|------|------|------|------|------|------|------|------|------|-----------------------|------|--------|------|------|------|------|-------|-------|------|------|-------|------|-------|-------|------|-------|-------|------|-------|-------|-------|------|-------|-------|-------|-------|------|-------|------|------|------|------|------|-------|------|------|-------|-------|------|------|------|------|------|------|------|------|------|------|------|------|------|----------|---|----|----|---|---|----------------|----------------|---------------------------------|----------------|--|--|--|--|--|--|--|--|--|--|--|--|--|--|--|--|-----------|-------|--|------|------|-------|-------|-------|------|-------|------|------|--|--|-----|------|------|-----|------|------|-------|-----|-------|-----|-----|------|
| 1                                                                                                                                                                                                                                                                                                                                                                                                                                                                                                                                                                                                                                                                                                                                                                                                                                                                                                                                                                                                                                                                                                                                                                                                                                                                                                                                                                                                                                                                                                                                                                                                                                                                                                                                                                                                                                                                                                                                                                                                                                                                                                                                                                                                                                                                                                                                                                                                                                                                                                                           | 17.47  | 71.9    | 7      | 4/25             | K60k           | (R)GVLVFLNVIR(D) | 1386.8467                       | 114.0550                        | 8.0                         | 11367.4/11.36   | HUMAN   | P62805      | 272939            | Histone H4 OS=Homo sapiens GN=HIST1H4A PE=1 SV=2 |                    |         |         |         |         |         |         |         |         |         |         |         |         |         |         |         |         |         |         |         |         |         |         |         |         |         |                         |      |       |      |      |      |      |       |      |      |      |      |      |      |      |      |      |      |      |      |      |      |      |      |      |      |                       |      |        |      |      |      |      |       |       |      |      |       |      |       |       |      |       |       |      |       |       |       |      |       |       |       |       |      |       |      |      |      |      |      |       |      |      |       |       |      |      |      |      |      |      |      |      |      |      |      |      |      |          |   |    |    |   |   |                |                |                                 |                |  |  |  |  |  |  |  |  |  |  |  |  |  |  |  |  |           |       |  |      |      |       |       |       |      |       |      |      |  |  |     |      |      |     |      |      |       |     |       |     |     |      |
| <table border="1"> <thead> <tr> <th>Fragment-Ion (m/z)</th> <th>72.080</th> <th>84.080</th> <th>86.096</th> <th>87.055</th> <th>102.052</th> <th>120.079</th> <th>129.101</th> <th>141.100</th> <th>157.095</th> <th>158.092</th> <th>175.118</th> <th>186.125</th> <th>271.155</th> <th>314.220</th> <th>342.214</th> <th>356.229</th> <th>455.299</th> <th>484.284</th> <th>612.354</th> <th>616.353</th> <th>630.357</th> <th>672.896</th> <th>743.442</th> <th>890.510</th> <th>989.572</th> </tr> </thead> <tbody> <tr> <td>Frac. Inten. (% of TIC)</td> <td>0.45</td> <td>21.07</td> <td>0.60</td> <td>0.06</td> <td>0.05</td> <td>0.26</td> <td>16.84</td> <td>2.16</td> <td>1.94</td> <td>1.73</td> <td>5.73</td> <td>1.65</td> <td>3.27</td> <td>2.34</td> <td>2.04</td> <td>3.44</td> <td>2.20</td> <td>1.71</td> <td>2.92</td> <td>2.19</td> <td>8.68</td> <td>1.75</td> <td>6.45</td> <td>5.38</td> <td>5.10</td> </tr> <tr> <td>Rel. Inten. (% of BP)</td> <td>2.15</td> <td>100.00</td> <td>2.84</td> <td>0.28</td> <td>0.26</td> <td>1.24</td> <td>79.92</td> <td>10.23</td> <td>9.20</td> <td>8.21</td> <td>27.18</td> <td>7.83</td> <td>15.50</td> <td>11.10</td> <td>9.67</td> <td>16.32</td> <td>10.46</td> <td>8.11</td> <td>13.86</td> <td>10.38</td> <td>41.19</td> <td>8.33</td> <td>30.62</td> <td>25.55</td> <td>24.21</td> </tr> <tr> <td>Score</td> <td>0.50</td> <td>-1.00</td> <td>0.22</td> <td>0.33</td> <td>1.00</td> <td>1.00</td> <td>0.50</td> <td>-0.10</td> <td>0.50</td> <td>1.50</td> <td>-0.08</td> <td>-0.16</td> <td>0.50</td> <td>0.75</td> <td>0.75</td> <td>0.75</td> <td>0.50</td> <td>0.50</td> <td>1.50</td> <td>1.50</td> <td>1.50</td> <td>1.50</td> <td>1.50</td> <td>1.50</td> <td>1.50</td> </tr> <tr> <td>Ion-type</td> <td>V</td> <td>LI</td> <td>NR</td> <td>E</td> <td>F</td> <td>a<sub>2</sub></td> <td>b<sub>2</sub></td> <td>y<sub>1</sub>-NH<sub>3</sub></td> <td>y<sub>1</sub></td> <td></td> </tr> <tr> <td>Delta ppm</td> <td>-16.3</td> <td></td> <td>-8.4</td> <td>-9.1</td> <td>-29.9</td> <td>-17.3</td> <td>-15.0</td> <td>0.50</td> <td>-18.2</td> <td>-0.0</td> <td>-5.4</td> <td></td> <td></td> <td>1.1</td> <td>-1.1</td> <td>-2.9</td> <td>1.2</td> <td>-8.9</td> <td>12.1</td> <td>-14.3</td> <td>0.2</td> <td>-11.5</td> <td>0.7</td> <td>0.3</td> <td>-5.7</td> </tr> </tbody> </table> |        |         |        |                  |                |                  |                                 |                                 |                             |                 |         |             |                   |                                                  | Fragment-Ion (m/z) | 72.080  | 84.080  | 86.096  | 87.055  | 102.052 | 120.079 | 129.101 | 141.100 | 157.095 | 158.092 | 175.118 | 186.125 | 271.155 | 314.220 | 342.214 | 356.229 | 455.299 | 484.284 | 612.354 | 616.353 | 630.357 | 672.896 | 743.442 | 890.510 | 989.572 | Frac. Inten. (% of TIC) | 0.45 | 21.07 | 0.60 | 0.06 | 0.05 | 0.26 | 16.84 | 2.16 | 1.94 | 1.73 | 5.73 | 1.65 | 3.27 | 2.34 | 2.04 | 3.44 | 2.20 | 1.71 | 2.92 | 2.19 | 8.68 | 1.75 | 6.45 | 5.38 | 5.10 | Rel. Inten. (% of BP) | 2.15 | 100.00 | 2.84 | 0.28 | 0.26 | 1.24 | 79.92 | 10.23 | 9.20 | 8.21 | 27.18 | 7.83 | 15.50 | 11.10 | 9.67 | 16.32 | 10.46 | 8.11 | 13.86 | 10.38 | 41.19 | 8.33 | 30.62 | 25.55 | 24.21 | Score | 0.50 | -1.00 | 0.22 | 0.33 | 1.00 | 1.00 | 0.50 | -0.10 | 0.50 | 1.50 | -0.08 | -0.16 | 0.50 | 0.75 | 0.75 | 0.75 | 0.50 | 0.50 | 1.50 | 1.50 | 1.50 | 1.50 | 1.50 | 1.50 | 1.50 | Ion-type | V | LI | NR | E | F | a <sub>2</sub> | b <sub>2</sub> | y <sub>1</sub> -NH <sub>3</sub> | y <sub>1</sub> |  |  |  |  |  |  |  |  |  |  |  |  |  |  |  |  | Delta ppm | -16.3 |  | -8.4 | -9.1 | -29.9 | -17.3 | -15.0 | 0.50 | -18.2 | -0.0 | -5.4 |  |  | 1.1 | -1.1 | -2.9 | 1.2 | -8.9 | 12.1 | -14.3 | 0.2 | -11.5 | 0.7 | 0.3 | -5.7 |
| Fragment-Ion (m/z)                                                                                                                                                                                                                                                                                                                                                                                                                                                                                                                                                                                                                                                                                                                                                                                                                                                                                                                                                                                                                                                                                                                                                                                                                                                                                                                                                                                                                                                                                                                                                                                                                                                                                                                                                                                                                                                                                                                                                                                                                                                                                                                                                                                                                                                                                                                                                                                                                                                                                                          | 72.080 | 84.080  | 86.096 | 87.055           | 102.052        | 120.079          | 129.101                         | 141.100                         | 157.095                     | 158.092         | 175.118 | 186.125     | 271.155           | 314.220                                          | 342.214            | 356.229 | 455.299 | 484.284 | 612.354 | 616.353 | 630.357 | 672.896 | 743.442 | 890.510 | 989.572 |         |         |         |         |         |         |         |         |         |         |         |         |         |         |         |                         |      |       |      |      |      |      |       |      |      |      |      |      |      |      |      |      |      |      |      |      |      |      |      |      |      |                       |      |        |      |      |      |      |       |       |      |      |       |      |       |       |      |       |       |      |       |       |       |      |       |       |       |       |      |       |      |      |      |      |      |       |      |      |       |       |      |      |      |      |      |      |      |      |      |      |      |      |      |          |   |    |    |   |   |                |                |                                 |                |  |  |  |  |  |  |  |  |  |  |  |  |  |  |  |  |           |       |  |      |      |       |       |       |      |       |      |      |  |  |     |      |      |     |      |      |       |     |       |     |     |      |
| Frac. Inten. (% of TIC)                                                                                                                                                                                                                                                                                                                                                                                                                                                                                                                                                                                                                                                                                                                                                                                                                                                                                                                                                                                                                                                                                                                                                                                                                                                                                                                                                                                                                                                                                                                                                                                                                                                                                                                                                                                                                                                                                                                                                                                                                                                                                                                                                                                                                                                                                                                                                                                                                                                                                                     | 0.45   | 21.07   | 0.60   | 0.06             | 0.05           | 0.26             | 16.84                           | 2.16                            | 1.94                        | 1.73            | 5.73    | 1.65        | 3.27              | 2.34                                             | 2.04               | 3.44    | 2.20    | 1.71    | 2.92    | 2.19    | 8.68    | 1.75    | 6.45    | 5.38    | 5.10    |         |         |         |         |         |         |         |         |         |         |         |         |         |         |         |                         |      |       |      |      |      |      |       |      |      |      |      |      |      |      |      |      |      |      |      |      |      |      |      |      |      |                       |      |        |      |      |      |      |       |       |      |      |       |      |       |       |      |       |       |      |       |       |       |      |       |       |       |       |      |       |      |      |      |      |      |       |      |      |       |       |      |      |      |      |      |      |      |      |      |      |      |      |      |          |   |    |    |   |   |                |                |                                 |                |  |  |  |  |  |  |  |  |  |  |  |  |  |  |  |  |           |       |  |      |      |       |       |       |      |       |      |      |  |  |     |      |      |     |      |      |       |     |       |     |     |      |
| Rel. Inten. (% of BP)                                                                                                                                                                                                                                                                                                                                                                                                                                                                                                                                                                                                                                                                                                                                                                                                                                                                                                                                                                                                                                                                                                                                                                                                                                                                                                                                                                                                                                                                                                                                                                                                                                                                                                                                                                                                                                                                                                                                                                                                                                                                                                                                                                                                                                                                                                                                                                                                                                                                                                       | 2.15   | 100.00  | 2.84   | 0.28             | 0.26           | 1.24             | 79.92                           | 10.23                           | 9.20                        | 8.21            | 27.18   | 7.83        | 15.50             | 11.10                                            | 9.67               | 16.32   | 10.46   | 8.11    | 13.86   | 10.38   | 41.19   | 8.33    | 30.62   | 25.55   | 24.21   |         |         |         |         |         |         |         |         |         |         |         |         |         |         |         |                         |      |       |      |      |      |      |       |      |      |      |      |      |      |      |      |      |      |      |      |      |      |      |      |      |      |                       |      |        |      |      |      |      |       |       |      |      |       |      |       |       |      |       |       |      |       |       |       |      |       |       |       |       |      |       |      |      |      |      |      |       |      |      |       |       |      |      |      |      |      |      |      |      |      |      |      |      |      |          |   |    |    |   |   |                |                |                                 |                |  |  |  |  |  |  |  |  |  |  |  |  |  |  |  |  |           |       |  |      |      |       |       |       |      |       |      |      |  |  |     |      |      |     |      |      |       |     |       |     |     |      |
| Score                                                                                                                                                                                                                                                                                                                                                                                                                                                                                                                                                                                                                                                                                                                                                                                                                                                                                                                                                                                                                                                                                                                                                                                                                                                                                                                                                                                                                                                                                                                                                                                                                                                                                                                                                                                                                                                                                                                                                                                                                                                                                                                                                                                                                                                                                                                                                                                                                                                                                                                       | 0.50   | -1.00   | 0.22   | 0.33             | 1.00           | 1.00             | 0.50                            | -0.10                           | 0.50                        | 1.50            | -0.08   | -0.16       | 0.50              | 0.75                                             | 0.75               | 0.75    | 0.50    | 0.50    | 1.50    | 1.50    | 1.50    | 1.50    | 1.50    | 1.50    | 1.50    |         |         |         |         |         |         |         |         |         |         |         |         |         |         |         |                         |      |       |      |      |      |      |       |      |      |      |      |      |      |      |      |      |      |      |      |      |      |      |      |      |      |                       |      |        |      |      |      |      |       |       |      |      |       |      |       |       |      |       |       |      |       |       |       |      |       |       |       |       |      |       |      |      |      |      |      |       |      |      |       |       |      |      |      |      |      |      |      |      |      |      |      |      |      |          |   |    |    |   |   |                |                |                                 |                |  |  |  |  |  |  |  |  |  |  |  |  |  |  |  |  |           |       |  |      |      |       |       |       |      |       |      |      |  |  |     |      |      |     |      |      |       |     |       |     |     |      |
| Ion-type                                                                                                                                                                                                                                                                                                                                                                                                                                                                                                                                                                                                                                                                                                                                                                                                                                                                                                                                                                                                                                                                                                                                                                                                                                                                                                                                                                                                                                                                                                                                                                                                                                                                                                                                                                                                                                                                                                                                                                                                                                                                                                                                                                                                                                                                                                                                                                                                                                                                                                                    | V      | LI      | NR     | E                | F              | a <sub>2</sub>   | b <sub>2</sub>                  | y <sub>1</sub> -NH <sub>3</sub> | y <sub>1</sub>              |                 |         |             |                   |                                                  |                    |         |         |         |         |         |         |         |         |         |         |         |         |         |         |         |         |         |         |         |         |         |         |         |         |         |                         |      |       |      |      |      |      |       |      |      |      |      |      |      |      |      |      |      |      |      |      |      |      |      |      |      |                       |      |        |      |      |      |      |       |       |      |      |       |      |       |       |      |       |       |      |       |       |       |      |       |       |       |       |      |       |      |      |      |      |      |       |      |      |       |       |      |      |      |      |      |      |      |      |      |      |      |      |      |          |   |    |    |   |   |                |                |                                 |                |  |  |  |  |  |  |  |  |  |  |  |  |  |  |  |  |           |       |  |      |      |       |       |       |      |       |      |      |  |  |     |      |      |     |      |      |       |     |       |     |     |      |
| Delta ppm                                                                                                                                                                                                                                                                                                                                                                                                                                                                                                                                                                                                                                                                                                                                                                                                                                                                                                                                                                                                                                                                                                                                                                                                                                                                                                                                                                                                                                                                                                                                                                                                                                                                                                                                                                                                                                                                                                                                                                                                                                                                                                                                                                                                                                                                                                                                                                                                                                                                                                                   | -16.3  |         | -8.4   | -9.1             | -29.9          | -17.3            | -15.0                           | 0.50                            | -18.2                       | -0.0            | -5.4    |             |                   | 1.1                                              | -1.1               | -2.9    | 1.2     | -8.9    | 12.1    | -14.3   | 0.2     | -11.5   | 0.7     | 0.3     | -5.7    |         |         |         |         |         |         |         |         |         |         |         |         |         |         |         |                         |      |       |      |      |      |      |       |      |      |      |      |      |      |      |      |      |      |      |      |      |      |      |      |      |      |                       |      |        |      |      |      |      |       |       |      |      |       |      |       |       |      |       |       |      |       |       |       |      |       |       |       |       |      |       |      |      |      |      |      |       |      |      |       |       |      |      |      |      |      |      |      |      |      |      |      |      |      |          |   |    |    |   |   |                |                |                                 |                |  |  |  |  |  |  |  |  |  |  |  |  |  |  |  |  |           |       |  |      |      |       |       |       |      |       |      |      |  |  |     |      |      |     |      |      |       |     |       |     |     |      |

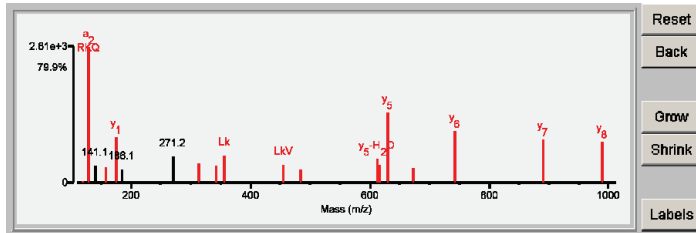



Result Summary

| Rank | Score | SPI (%) | BCS | # Unmatched Ions | # Variable sites | Sequence            | MH <sup>+</sup> Calculated (Da) | MH <sup>+</sup> Error (Da) | MH <sup>+</sup> Error (ppm) | Protein MW/pI (Da) | Species | Accession # | Protein Name                                     |
|------|-------|---------|-----|------------------|------------------|---------------------|---------------------------------|----------------------------|-----------------------------|--------------------|---------|-------------|--------------------------------------------------|
| 1    | 14.22 | 66.7    | 8   | 8/25             | K92k             | (K)ITVTAMDVYALKR(Q) | 1466.8036                       | 114.0569                   | 8.8                         | 11367.4/11.36      | HUMAN   | P62805      | Histone H4 OS=Homo sapiens GN=HIST1H4A PE=1 SV=2 |

Detailed Results

| Rank | Score | SPI (%) | BCS | # Unmatched Ions | # Variable sites | Sequence            | MH <sup>+</sup> Calculated (Da) | MH <sup>+</sup> Error (Da) | MH <sup>+</sup> Error (ppm) | Protein MW/pI (Da) | Species | Accession # | MS-Digest Index # | Protein Name                                     |
|------|-------|---------|-----|------------------|------------------|---------------------|---------------------------------|----------------------------|-----------------------------|--------------------|---------|-------------|-------------------|--------------------------------------------------|
| 1    | 14.22 | 66.7    | 8   | 8/25             | K92k             | (K)ITVTAMDVYALKR(Q) | 1466.8036                       | 114.0569                   | 8.8                         | 11367.4/11.36      | HUMAN   | P62805      | 136470            | Histone H4 OS=Homo sapiens GN=HIST1H4A PE=1 SV=2 |

  

| Fragment-ion (m/z)      | 70.065 | 72.079 | 74.060 | 84.081 | 86.096 | 101.068 | 104.052 | 120.080 | 136.075 | 173.128 | 175.115 | 187.139 | 201.126 | 300.199 | 348.186 | 356.234 | 400.212 | 417.241 | 530.338 | 601.278 | 601.385 | 764.443 | 764.547 | 863.511 | 1077.578 |
|-------------------------|--------|--------|--------|--------|--------|---------|---------|---------|---------|---------|---------|---------|---------|---------|---------|---------|---------|---------|---------|---------|---------|---------|---------|---------|----------|
| Frac. Inten. (% of TIC) | 0.00   | 0.50   | 2.67   | 6.12   | 0.39   | 6.18    | 2.96    | 5.36    | 0.32    | 19.58   | 3.47    | 2.32    | 4.85    | 3.42    | 2.51    | 2.34    | 2.70    | 4.31    | 3.99    | 2.71    | 5.90    | 7.20    | 4.27    | 3.08    | 2.83     |
| Rel. Inten. (% of BP)   | 0.01   | 2.57   | 13.65  | 31.25  | 1.98   | 31.57   | 15.12   | 27.35   | 1.63    | 100.00  | 17.72   | 11.86   | 24.78   | 17.48   | 12.81   | 11.93   | 13.80   | 22.02   | 20.37   | 13.85   | 30.14   | 36.77   | 21.81   | 15.70   | 14.43    |
| Score                   | 0.20   | 0.50   | 0.50   | -0.31  | 0.22   | -0.32   | -0.15   | -0.27   | 1.00    | 0.50    | 1.50    | -0.12   | 0.75    | -0.17   | 0.75    | 0.75    | -0.14   | 1.50    | 1.50    | 0.25    | 1.50    | 1.50    | -0.22   | 1.50    | 1.50     |
| Ion-type                | PR     | V      | a1     |        | LI     |         |         | Y       | a2      | y1      |         |         | b2      | YAL     | Lk      |         |         | y2      | y3      | b6-H2O  | y4      | y5      | y6      | y8      |          |
| Delta ppm               | 2.5    | -17.7  | -10.0  |        | -7.3   |         |         |         | -4.3    |         |         |         |         |         | -20.6   | 10.6    |         | -38.4   | -6.0    | 19.6    | 12.1    | 1.9     |         | 1.4     | -25.2    |

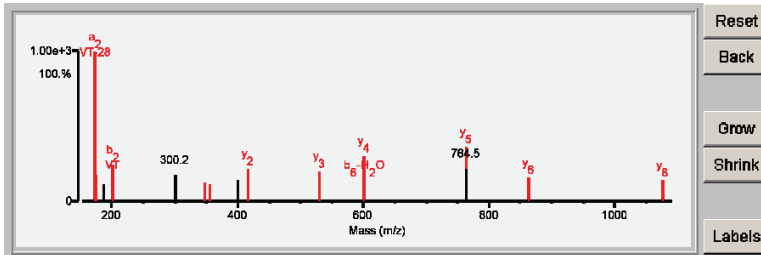

Reset

Back

Grow

Shrink

Labels

Result Summary

| Rank | Score | SPI (%) | BCS | # Unmatched Ions | Variable sites | Sequence              | MH <sup>+</sup> Calculated (Da) | MH <sup>+</sup> Error (Da) | MH <sup>+</sup> Error (ppm) | Protein MW/pi (Da) | Species | Accession # | Protein Name                                                   |
|------|-------|---------|-----|------------------|----------------|-----------------------|---------------------------------|----------------------------|-----------------------------|--------------------|---------|-------------|----------------------------------------------------------------|
| 1    | 15.30 | 72.9    | 8   | 6/25             | K199k          | (R)ESVELAKLLDEDEIR(G) | 1871.9961                       | 114.0567                   | 6.9                         | 85853.2/4.29       | HUMAN   | O43719      | HIV Tat-specific factor 1 OS=Homo sapiens GN=HTATSF1 PE=1 SV=1 |

Detailed Results

| Rank                   | Score  | SPI (%) | BCS    | # Unmatched Ions | Variable sites | Sequence                                               | MH <sup>+</sup> Calculated (Da) | MH <sup>+</sup> Error (Da) | MH <sup>+</sup> Error (ppm) | Protein MW/pi (Da) | Species | Accession # | MS-Digest Index # | Protein Name                                                   |                   |                   |                       |                       |         |         |                       |                   |                       |         |          |
|------------------------|--------|---------|--------|------------------|----------------|--------------------------------------------------------|---------------------------------|----------------------------|-----------------------------|--------------------|---------|-------------|-------------------|----------------------------------------------------------------|-------------------|-------------------|-----------------------|-----------------------|---------|---------|-----------------------|-------------------|-----------------------|---------|----------|
| 1                      | 15.30  | 72.9    | 8      | 6/25             | K199k          | (R)E S V E / L / A / L / k / L / L / D E D E I / R (G) | 1871.9961                       | 114.0567                   | 6.9                         | 85853.2/4.29       | HUMAN   | O43719      | 151350            | HIV Tat-specific factor 1 OS=Homo sapiens GN=HTATSF1 PE=1 SV=1 |                   |                   |                       |                       |         |         |                       |                   |                       |         |          |
| Fragment-ion (m/z)     | 72.081 | 84.083  | 86.097 | 102.057          | 129.100        | 175.117                                                | 201.123                         | 215.147                    | 217.074                     | 229.117            | 280.128 | 384.216     | 427.181           | 427.271                                                        | 469.313           | 611.308           | 622.825 <sup>+2</sup> | 679.366 <sup>+2</sup> | 714.904 | 724.375 | 771.434 <sup>+2</sup> | 776.348           | 777.352 <sup>+2</sup> | 889.438 | 1002.505 |
| Frac. Inten.(% of TIC) | 0.22   | 9.38    | 0.54   | 0.15             | 0.09           | 4.14                                                   | 2.59                            | 4.70                       | 2.46                        | 3.89               | 3.08    | 2.67        | 4.22              | 3.38                                                           | 3.00              | 3.69              | 5.44                  | 4.74                  | 3.11    | 2.54    | 6.94                  | 10.36             | 4.84                  | 6.94    | 6.89     |
| Rel. Inten.(% of BP)   | 2.08   | 90.57   | 5.21   | 1.44             | 0.91           | 40.01                                                  | 24.99                           | 45.33                      | 23.79                       | 37.53              | 29.72   | 25.75       | 40.77             | 32.63                                                          | 28.94             | 35.58             | 52.55                 | 45.75                 | 29.98   | 24.53   | 66.99                 | 100.00            | 46.75                 | 67.03   | 66.47    |
| Score                  | 0.50   | -0.91   | 0.22   | 1.00             | 0.20           | 1.50                                                   | 0.50                            | -0.45                      | -0.24                       | 0.75               | -0.30   | -0.26       | 0.25              | 0.75                                                           | 0.75              | 0.25              | 1.50                  | 1.50                  | 1.50    | 0.25    | 1.50                  | 1.50              | 1.50                  | 1.50    | 1.50     |
| Ion-type               | V      | LI      | LI     | a1               | RKQ            | y1                                                     | LD-28                           | LD                         | LD                          | b4-H2O             | ALK     | kLL         | b6-H2O            | y9 <sup>+2</sup>                                               | y10 <sup>+2</sup> | y11 <sup>+2</sup> | b7-H2O                | a13 <sup>+2</sup>     | y6      | y7      | y8                    | y12 <sup>+2</sup> |                       |         |          |
| Delta ppm              | 4.5    |         | 5.5    | 8.3              | -18.9          | -14.0                                                  | -5.3                            |                            |                             | -11.3              |         |             | -5.5              | 7.9                                                            | -3.2              | 6.4               | -4.2                  | -5.3                  | 22.4    | -19.6   | 34.6                  | 7.4               | 13.4                  | -4.9    |          |

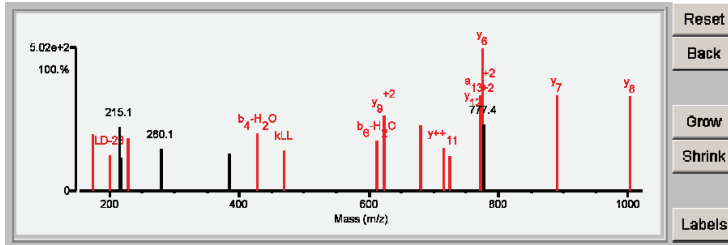

Reset

Back

Grow

Shrink

Labels

Result Summary

| Rank | Score | SPI (%) | BCS | # Unmatched Ions | Variable sites    | Sequence              | MH <sup>+</sup> Calculated (Da) | MH <sup>+</sup> Error (Da) | MH <sup>+</sup> Error (ppm) | Protein MW/pl (Da) | Species | Accession # | Protein Name                                                                      |
|------|-------|---------|-----|------------------|-------------------|-----------------------|---------------------------------|----------------------------|-----------------------------|--------------------|---------|-------------|-----------------------------------------------------------------------------------|
| 1    | 15.95 | 84.6    | 7   | 6/24             | K175k             | (R)SVGYKPDFVGFEPDK(F) | 1797.9058                       | 114.0563                   | 7.0                         | 24579.5/6.21       | HUMAN   | P00492      | Hypoxanthine-guanine phosphoribosyltransferase OS=Homo sapiens GN=HPRT1 PE=1 SV=2 |
| 2    | 5.33  | 60.0    | 1   | 13/24            | M221m K232k K234k | (R)LMQETTLGSVDFKk(Q)  | 1667.8673                       | 244.0948                   | 7.3                         | 50199.9/5.29       | HUMAN   | RQ86TP1     | REVERSE Protein prune homolog OS=Homo sapiens GN=PRUNE PE=1 SV=2                  |
| 3    | 3.88  | 51.9    | 1   | 15/24            | K140k K151k       | (K)kSGGWASVYKGGQ(L)   | 1683.8635                       | 228.0985                   | 6.6                         | 50662.3/5.49       | HUMAN   | Q8N594      | MPN domain-containing protein OS=Homo sapiens GN=MPND PE=1 SV=1                   |
| 4    | 3.43  | 52.8    | 2   | 14/24            | K994k             | (K)QLEADVSHKTKRK(L)   | 1797.9454                       | 114.0167                   | -13.7                       | 207530.0/9.26      | HUMAN   | Q96QE3      | ATPase family AAA domain-containing protein 5 OS=Homo sapiens GN=ATAD5 PE=1 SV=3  |
| 4    | 3.43  | 52.8    | 2   | 14/24            | K997k             | (K)QLEADVSHKTKRK(L)   | 1797.9454                       | 114.0167                   | -13.7                       | 207530.0/9.26      | HUMAN   | Q96QE3      | ATPase family AAA domain-containing protein 5 OS=Homo sapiens GN=ATAD5 PE=1 SV=3  |

Detailed Results

| Rank | Score | SPI (%) | BCS | # Unmatched Ions | Variable sites | Sequence              | MH <sup>+</sup> Calculated (Da) | MH <sup>+</sup> Error (Da) | MH <sup>+</sup> Error (ppm) | Protein MW/pl (Da) | Species | Accession # | MS-Digest Index # | Protein Name                                                                      |
|------|-------|---------|-----|------------------|----------------|-----------------------|---------------------------------|----------------------------|-----------------------------|--------------------|---------|-------------|-------------------|-----------------------------------------------------------------------------------|
| 1    | 15.95 | 84.6    | 7   | 6/24             | K175k          | (R)SVGYKPDFVGFEPDK(F) | 1797.9058                       | 114.0563                   | 7.0                         | 24579.5/6.21       | HUMAN   | P00492      | 295277            | Hypoxanthine-guanine phosphoribosyltransferase OS=Homo sapiens GN=HPRT1 PE=1 SV=2 |

  

| Fragment-ion (m/z)      | 70.065 | 72.079 | 84.080 | 86.095 | 120.079 | 129.100 | 136.077 | 147.113 | 159.112 | 177.101 | 187.109 | 213.089 | 291.198 | 359.192 | 432.190 | 463.232 | 472.279 | 617.371 | 753.392*2 | 805.410 | 836.424 | 863.432*2 | 903.456 | 1263.624 |
|-------------------------|--------|--------|--------|--------|---------|---------|---------|---------|---------|---------|---------|---------|---------|---------|---------|---------|---------|---------|-----------|---------|---------|-----------|---------|----------|
| Frac. Inten. (% of TIC) | 0.00   | 0.31   | 0.29   | 0.17   | 0.16    | 0.08    | 0.06    | 3.35    | 23.05   | 2.89    | 5.70    | 2.64    | 2.13    | 13.96   | 2.30    | 10.77   | 2.49    | 2.44    | 3.25      | 9.75    | 2.24    | 3.09      | 3.43    | 5.42     |
| Rel. Inten. (% of BP)   | 0.01   | 1.36   | 1.24   | 0.75   | 0.71    | 0.36    | 0.27    | 14.52   | 100.00  | 12.52   | 24.73   | 11.47   | 9.25    | 60.56   | 9.99    | 46.72   | 10.81   | 10.80   | 14.08     | 42.23   | 9.73    | 13.42     | 14.86   | 23.51    |
| Score                   | 0.20   | 0.50   | 0.50   | 0.22   | 1.00    | 0.20    | 1.00    | 1.50    | 0.50    | -0.13   | 0.50    | 0.75    | -0.09   | 1.50    | -0.10   | 0.75    | 1.50    | -0.11   | 1.50      | 1.50    | -0.10   | 1.50      | -0.15   | 1.50     |
| Ion-type                | PR     | V      | KQ     | LI     | F       | RKQ     | Y       | y1      | a2      | b2      | PD      | y3      | y4      | y3      | GYk     | y4      | y7      | y12     | y12       | y7      | y14     | y11       | y11     |          |
| Delta ppm               | -3.2   | -21.9  | -11.6  | -13.1  | -17.3   | -15.8   | 12.6    | 4.1     | -12.0   | -1.2    | 5.3     | -1.7    |         |         | 1.2     | 6.2     |         | 8.5     | 8.5       | 1.4     |         | 4.7       | -1.4    |          |

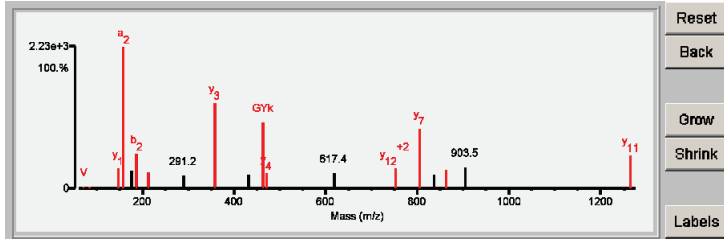

Reset

Back

Grow

Shrink

Labels

Result Summary

| Rank | Score | SPI (%) | BCS | # Unmatched Ions | Variable sites | Sequence                   | MH <sup>+</sup> Calculated (Da) | MH <sup>+</sup> Error (Da) | MH <sup>+</sup> Error (ppm) | Protein MW/PI (Da) | Species | Accession # | Protein Name                                                |
|------|-------|---------|-----|------------------|----------------|----------------------------|---------------------------------|----------------------------|-----------------------------|--------------------|---------|-------------|-------------------------------------------------------------|
| 1    | 14.58 | 79.7    | 9   | 7/25             | K240k          | (R)NKNPAPPIDAVEQILPTLVR(L) | 2185.2339                       | 114.0608                   | 7.8                         | 57862.2/5.25       | HUMAN   | P52292      | Importin subunit alpha-2 OS=Homo sapiens GN=KPNA2 PE=1 SV=1 |

Detailed Results

| Rank                   | Score | SPI (%) | BCS | # Unmatched Ions | Variable sites | Sequence                   | MH <sup>+</sup> Calculated (Da) | MH <sup>+</sup> Error (Da) | MH <sup>+</sup> Error (ppm) | Protein MW/PI (Da) | Species | Accession # | MS-Digest Index # | Protein Name                                                |         |         |                       |         |                       |         |         |         |                       |         |                       |         |         |                       |          |          |          |       |      |
|------------------------|-------|---------|-----|------------------|----------------|----------------------------|---------------------------------|----------------------------|-----------------------------|--------------------|---------|-------------|-------------------|-------------------------------------------------------------|---------|---------|-----------------------|---------|-----------------------|---------|---------|---------|-----------------------|---------|-----------------------|---------|---------|-----------------------|----------|----------|----------|-------|------|
| 1                      | 14.58 | 79.7    | 9   | 7/25             | K240k          | (R)NKNPAPPIDAVEQILPTLVR(L) | 2185.2339                       | 114.0608                   | 7.8                         | 57862.2/5.25       | HUMAN   | P52292      | 318397            | Importin subunit alpha-2 OS=Homo sapiens GN=KPNA2 PE=1 SV=1 |         |         |                       |         |                       |         |         |         |                       |         |                       |         |         |                       |          |          |          |       |      |
| Fragment-ion (m/z)     |       |         |     |                  |                |                            | 70.064                          | 84.081                     | 179.111                     | 215.136            | 258.112 | 312.178     | 357.184           | 423.228                                                     | 471.231 | 485.224 | 566.788 <sup>+2</sup> | 585.372 | 616.320 <sup>+2</sup> | 639.309 | 698.456 | 728.356 | 801.430 <sup>+2</sup> | 811.538 | 830.991 <sup>+2</sup> | 861.446 | 939.588 | 940.587 <sup>+2</sup> | 1068.660 | 1231.626 | 1679.720 |       |      |
| Frac. Inten.(% of TIC) |       |         |     |                  |                |                            | 0.00                            | 0.10                       | 3.03                        | 2.24               | 2.75    | 2.22        | 3.30              | 4.41                                                        | 2.32    | 2.82    | 3.11                  | 18.14   | 3.88                  | 5.90    | 9.71    | 2.56    | 2.23                  | 3.44    | 9.69                  | 2.43    | 2.35    | 3.01                  | 3.01     | 3.07     | 4.27     |       |      |
| Rel. Inten.(% of BP)   |       |         |     |                  |                |                            | 0.01                            | 0.56                       | 16.69                       | 12.35              | 15.14   | 12.24       | 18.19             | 24.30                                                       | 12.77   | 15.55   | 17.15                 | 100.00  | 21.41                 | 32.51   | 53.52   | 14.12   | 12.28                 | 18.97   | 53.43                 | 13.38   | 12.95   | 16.59                 | 16.57    | 16.94    | 23.55    |       |      |
| Score                  |       |         |     |                  |                |                            | 0.20                            | 0.50                       | -0.17                       | 0.75               | 0.75    | -0.12       | 0.75              | 0.75                                                        | 0.50    | -0.16   | 0.50                  | 0.50    | 0.50                  | 1.50    | 1.50    | -0.14   | 0.50                  | 1.50    | 1.50                  | 1.50    | 1.50    | -0.13                 | 1.50     | 1.50     | 1.50     | 1.50  | 1.50 |
| Ion-type               |       |         |     |                  |                |                            | PR                              | KQ                         |                             | TL                 | EQ      |             | b2                | PPID                                                        | b3      |         | b10 <sup>+2</sup>     | y5      | b11 <sup>+2</sup>     | b5      | y6      |         | b14 <sup>+2</sup>     | y7      | y15 <sup>+2</sup>     |         | y8      |                       | y9       | b11      |          |       |      |
| Delta ppm              |       |         |     |                  |                |                            | -17.5                           | 0.3                        |                             | -19.6              | 9.9     |             | -15.4             | 16.1                                                        |         | 7.1     | -2.0                  |         | -5.9                  | 0.2     | -9.7    | -20.2   | -0.5                  |         | 15.1                  | -2.8    | 6.8     |                       | -10.9    | 17.3     | 17.3     | -15.1 |      |

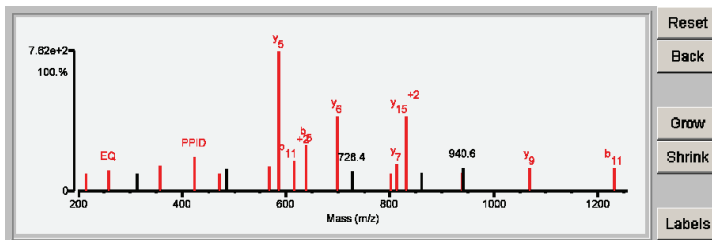

Reset

Back

Grow

Shrink

Labels

Result Summary

| Rank | Score | SPI (%) | BCS | Unmatched Ions | # Variable sites | Sequence                    | MH <sup>+</sup> Calculated (Da) | MH <sup>+</sup> Error (Da) | MH <sup>+</sup> Error (ppm) | Protein MW/pl (Da) | Species | Accession # | Protein Name                                                |
|------|-------|---------|-----|----------------|------------------|-----------------------------|---------------------------------|----------------------------|-----------------------------|--------------------|---------|-------------|-------------------------------------------------------------|
| 1    | 13.79 | 68.8    | 7   | 9/25           | K300k            | (K)TGVVQLVLLGASELPVTPALR(A) | 2471.4960                       | 114.0576                   | 5.7                         | 57862.2/5.25       | HUMAN   | P52292      | Importin subunit alpha-2 OS=Homo sapiens GN=KPNA2 PE=1 SV=1 |

Detailed Results

| Rank | Score | SPI (%) | BCS | Unmatched Ions | # Variable sites | Sequence                    | MH <sup>+</sup> Calculated (Da) | MH <sup>+</sup> Error (Da) | MH <sup>+</sup> Error (ppm) | Protein MW/pl (Da) | Species | Accession # | MS-Digest Index # | Protein Name                                                |         |         |                  |                       |         |                       |         |         |         |         |         |         |                       |         |         |         |                        |                        |                   |      |
|------|-------|---------|-----|----------------|------------------|-----------------------------|---------------------------------|----------------------------|-----------------------------|--------------------|---------|-------------|-------------------|-------------------------------------------------------------|---------|---------|------------------|-----------------------|---------|-----------------------|---------|---------|---------|---------|---------|---------|-----------------------|---------|---------|---------|------------------------|------------------------|-------------------|------|
| 1    | 13.79 | 68.8    | 7   | 9/25           | K300k            | (K)TGVVQLVLLGASELPVTPALR(A) | 2471.4960                       | 114.0576                   | 5.7                         | 57862.2/5.25       | HUMAN   | P52292      | 318397            | Importin subunit alpha-2 OS=Homo sapiens GN=KPNA2 PE=1 SV=1 |         |         |                  |                       |         |                       |         |         |         |         |         |         |                       |         |         |         |                        |                        |                   |      |
|      |       |         |     |                |                  |                             | Fragment-ion (m/z)              | 72.080                     | 86.094                      | 101.069            | 102.055 | 258.142     | 288.112           | 329.214                                                     | 357.210 | 366.187 | 418.205          | 433.781 <sup>+2</sup> | 557.328 | 581.810 <sup>+2</sup> | 656.412 | 663.379 | 677.009 | 680.410 | 696.427 | 763.709 | 764.381 <sup>+3</sup> | 866.539 | 926.503 | 979.621 | 1096.999 <sup>+2</sup> | 1115.160 <sup>+2</sup> |                   |      |
|      |       |         |     |                |                  |                             | Frac. Inten.(% of TIC)          | 0.08                       | 0.14                        | 0.12               | 0.09    | 7.48        | 2.87              | 3.69                                                        | 7.62    | 4.00    | 3.07             | 5.48                  | 2.75    | 5.63                  | 2.80    | 3.62    | 2.75    | 2.60    | 3.99    | 3.88    | 2.59                  | 18.54   | 2.84    | 2.76    | 2.76                   | 7.82                   |                   |      |
|      |       |         |     |                |                  |                             | Rel. Inten.(% of BP)            | 0.43                       | 0.76                        | 0.66               | 0.49    | 40.34       | 15.48             | 19.91                                                       | 41.11   | 21.56   | 16.58            | 29.54                 | 14.83   | 30.38                 | 15.09   | 19.53   | 14.85   | 14.02   | 21.51   | 20.92   | 13.99                 | 100.00  | 15.33   | 14.90   | 14.88                  | 42.17                  |                   |      |
|      |       |         |     |                |                  |                             | Score                           | 0.50                       | 0.22                        | 0.50               | 1.00    | 0.50        | 0.75              | 0.50                                                        | 0.50    | -0.22   | -0.17            | 1.50                  | 1.50    | 0.30                  | 1.50    | -0.20   | -0.15   | 0.75    | 0.75    | -0.21   | -0.14                 | 1.50    | -0.15   | 1.50    | -0.15                  | 1.50                   |                   |      |
|      |       |         |     |                |                  |                             | Ion-type                        | V                          | LI                          | QK                 | b1      | b3          | ASE               | a4                                                          | b4      |         | y8 <sup>+2</sup> | y5                    |         |                       |         |         |         | PQLVv   | VkLLGA  |         |                       |         | y8      | y9      |                        |                        | y20 <sup>+2</sup> |      |
|      |       |         |     |                |                  |                             | Delta ppm                       | -5.2                       | -22.4                       | -17.2              | -14.2   | -16.0       | -29.5             | -16.2                                                       | -12.7   |         |                  | 10.3                  | -23.1   |                       |         |         |         | 5.0     |         |         | 0.3                   | -20.8   |         | -7.4    |                        | -9.5                   |                   | -8.9 |

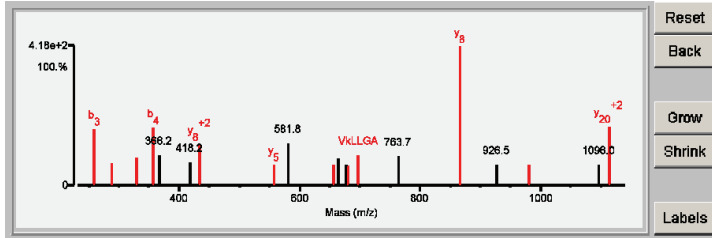

Result Summary

| Rank | Score | SPI (%) | BCS | # Unmatched ions | Variable sites | Sequence                                           | MH <sup>+</sup> Calculated (Da) | MH <sup>+</sup> Error (Da) | MH <sup>+</sup> Error (ppm) | Protein MW/pl (Da) | Species | Accession # | Protein Name                                                |
|------|-------|---------|-----|------------------|----------------|----------------------------------------------------|---------------------------------|----------------------------|-----------------------------|--------------------|---------|-------------|-------------------------------------------------------------|
| 1    | 15.62 | 86.9    | 10  | 6/24             | K459k          | (K)LG <del>E</del> T <del>E</del> KLSIMIECGGLDK(I) | 2122.0406                       | 114.0501                   | 3.2                         | 57862.2/5.25       | HUMAN   | P52292      | Importin subunit alpha-2 OS=Homo sapiens GN=KPNA2 PE=1 SV=1 |

Detailed Results

| Rank | Score | SPI (%) | BCS | # Unmatched ions | Variable sites | Sequence                                                          | MH <sup>+</sup> Calculated (Da) | MH <sup>+</sup> Error (Da) | MH <sup>+</sup> Error (ppm) | Protein MW/pl (Da) | Species | Accession # | MS-Digest Index # | Protein Name                                                |         |                  |         |         |         |                       |         |         |         |         |         |         |          |          |          |          |       |      |      |
|------|-------|---------|-----|------------------|----------------|-------------------------------------------------------------------|---------------------------------|----------------------------|-----------------------------|--------------------|---------|-------------|-------------------|-------------------------------------------------------------|---------|------------------|---------|---------|---------|-----------------------|---------|---------|---------|---------|---------|---------|----------|----------|----------|----------|-------|------|------|
| 1    | 15.62 | 86.9    | 10  | 6/24             | K459k          | (K) L G <del>E</del> T <del>E</del> K L S I M I E C G G L D K (I) | 2122.0406                       | 114.0501                   | 3.2                         | 57862.2/5.25       | HUMAN   | P52292      | 318397            | Importin subunit alpha-2 OS=Homo sapiens GN=KPNA2 PE=1 SV=1 |         |                  |         |         |         |                       |         |         |         |         |         |         |          |          |          |          |       |      |      |
|      |       |         |     |                  |                |                                                                   | 70.066                          | 84.081                     | 86.095                      | 87.099             | 104.051 | 120.079     | 217.132           | 233.163                                                     | 244.091 | 245.130          | 300.150 | 356.222 | 489.264 | 529.293 <sup>+2</sup> | 649.301 | 772.383 | 778.335 | 885.464 | 907.386 | 972.504 | 1020.477 | 1085.588 | 1151.511 | 1216.637 |       |      |      |
|      |       |         |     |                  |                |                                                                   | Frac. Inten. (% of TIC)         | 0.06                       | 0.17                        | 20.88              | 1.94    | 3.68        | 2.49              | 2.95                                                        | 3.00    | 1.92             | 2.23    | 2.35    | 2.14    | 2.26                  | 3.37    | 5.37    | 2.02    | 6.46    | 2.96    | 11.77   | 2.69     | 9.22     | 3.05     | 4.48     | 2.52  |      |      |
|      |       |         |     |                  |                |                                                                   | Rel. Inten. (% of BP)           | 0.28                       | 0.79                        | 100.00             | 9.29    | 17.65       | 11.94             | 14.12                                                       | 14.38   | 9.20             | 10.70   | 11.24   | 10.23   | 10.84                 | 16.16   | 25.74   | 9.70    | 30.94   | 14.19   | 56.36   | 12.90    | 44.17    | 14.61    | 21.48    | 12.09 |      |      |
|      |       |         |     |                  |                |                                                                   | Score                           | -0.00                      | 0.50                        | 0.50               | -0.09   | -0.18       | -0.12             | 0.50                                                        | -0.14   | -0.09            | 1.50    | 0.50    | 0.75    | 1.50                  | 0.50    | 1.50    | 0.50    | 1.50    | 0.50    | 1.50    | 0.50     | 1.50     | 0.50     | 1.50     | 0.50  | 1.50 | 0.50 |
|      |       |         |     |                  |                |                                                                   | Ion-type                        |                            | KQ                          | a1                 |         |             | MI-28             |                                                             |         | y <sup>++5</sup> | b3      | kL      | y5      | a8 <sup>+2</sup>      | y6      | b6      | y7      | b7      | y8      | b8      | y9       | b9       | y10      | b10      |       |      |      |
|      |       |         |     |                  |                |                                                                   | Delta ppm                       |                            | -2.1                        | -24.7              |         |             | -28.1             |                                                             |         | -29.0            |         | -23.9   | -5.8    | -10.0                 | 4.9     | -2.0    | -6.0    | -5.2    | 3.8     | 3.5     | 10.5     | 2.8      | 3.4      | 9.4      |       |      |      |

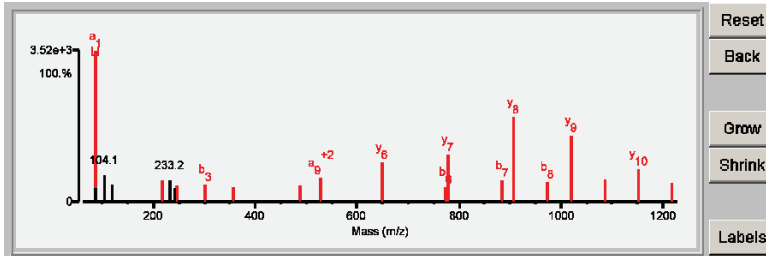

Reset  
Back  
Grow  
Shrink  
Labels

Result Summary

| Rank | Score | SPI (%) | BCS | # Unmatched Ions | Variable sites | Sequence               | MH <sup>+</sup> Calculated (Da) | MH <sup>+</sup> Error (Da) | MH <sup>+</sup> Error (ppm) | Protein MW/pl (Da) | Species | Accession # | Protein Name                                               |
|------|-------|---------|-----|------------------|----------------|------------------------|---------------------------------|----------------------------|-----------------------------|--------------------|---------|-------------|------------------------------------------------------------|
| 1    | 11.43 | 62.5    | 8   | 10/25            | K537k          | (R)SSAYESLMEIVKNSAK(D) | 1756.8786                       | 114.0594                   | 8.8                         | 97170.8/4.68       | HUMAN   | Q14974      | Importin subunit beta-1 OS=Homo sapiens GN=KPXB1 PE=1 SV=2 |
| 2    | 7.66  | 55.6    | 6   | 12/25            | K541k          | (R)SSAYESLMEIVKNSAK(D) | 1756.8786                       | 114.0594                   | 8.8                         | 97170.8/4.68       | HUMAN   | Q14974      | Importin subunit beta-1 OS=Homo sapiens GN=KPXB1 PE=1 SV=2 |

Detailed Results

| Rank                                                                                                                                                                                                                                                                                                                                                                                                                                                                                                                                                                                                                                                                                                                                                                                                                                                                                                                                                                                                                                                                                                                                                                                                                                                                                                                                                                                                                                                                                                                                                                                                                                                                                                                                                                                                                                                                                                                                                                                                                                                                                                                                                                                                                                                                                                                                                                                                                                                                                                                            | Score  | SPI (%) | BCS    | # Unmatched Ions | Variable sites | Sequence               | MH <sup>+</sup> Calculated (Da) | MH <sup>+</sup> Error (Da) | MH <sup>+</sup> Error (ppm) | Protein MW/pl (Da) | Species | Accession # | MS-Digest Index # | Protein Name                                               |                    |         |         |         |                       |         |         |                       |         |                       |          |         |         |         |         |         |         |         |         |                       |         |         |                       |         |                       |          |                         |      |      |      |      |      |      |      |      |      |      |      |      |      |      |      |      |      |      |      |      |      |      |      |      |      |                       |      |       |      |      |      |       |       |       |      |       |       |        |       |       |       |       |       |       |       |       |       |       |       |       |       |       |       |       |      |      |      |       |       |       |      |      |      |      |       |       |      |      |      |      |      |       |      |      |       |       |      |          |  |  |    |    |   |  |  |  |   |    |    |        |  |  |    |        |    |    |                   |  |    |                   |  |  |    |           |  |  |       |       |       |  |  |  |       |      |       |     |  |  |     |     |     |     |  |  |       |  |  |  |       |
|---------------------------------------------------------------------------------------------------------------------------------------------------------------------------------------------------------------------------------------------------------------------------------------------------------------------------------------------------------------------------------------------------------------------------------------------------------------------------------------------------------------------------------------------------------------------------------------------------------------------------------------------------------------------------------------------------------------------------------------------------------------------------------------------------------------------------------------------------------------------------------------------------------------------------------------------------------------------------------------------------------------------------------------------------------------------------------------------------------------------------------------------------------------------------------------------------------------------------------------------------------------------------------------------------------------------------------------------------------------------------------------------------------------------------------------------------------------------------------------------------------------------------------------------------------------------------------------------------------------------------------------------------------------------------------------------------------------------------------------------------------------------------------------------------------------------------------------------------------------------------------------------------------------------------------------------------------------------------------------------------------------------------------------------------------------------------------------------------------------------------------------------------------------------------------------------------------------------------------------------------------------------------------------------------------------------------------------------------------------------------------------------------------------------------------------------------------------------------------------------------------------------------------|--------|---------|--------|------------------|----------------|------------------------|---------------------------------|----------------------------|-----------------------------|--------------------|---------|-------------|-------------------|------------------------------------------------------------|--------------------|---------|---------|---------|-----------------------|---------|---------|-----------------------|---------|-----------------------|----------|---------|---------|---------|---------|---------|---------|---------|---------|-----------------------|---------|---------|-----------------------|---------|-----------------------|----------|-------------------------|------|------|------|------|------|------|------|------|------|------|------|------|------|------|------|------|------|------|------|------|------|------|------|------|------|-----------------------|------|-------|------|------|------|-------|-------|-------|------|-------|-------|--------|-------|-------|-------|-------|-------|-------|-------|-------|-------|-------|-------|-------|-------|-------|-------|-------|------|------|------|-------|-------|-------|------|------|------|------|-------|-------|------|------|------|------|------|-------|------|------|-------|-------|------|----------|--|--|----|----|---|--|--|--|---|----|----|--------|--|--|----|--------|----|----|-------------------|--|----|-------------------|--|--|----|-----------|--|--|-------|-------|-------|--|--|--|-------|------|-------|-----|--|--|-----|-----|-----|-----|--|--|-------|--|--|--|-------|
| 1                                                                                                                                                                                                                                                                                                                                                                                                                                                                                                                                                                                                                                                                                                                                                                                                                                                                                                                                                                                                                                                                                                                                                                                                                                                                                                                                                                                                                                                                                                                                                                                                                                                                                                                                                                                                                                                                                                                                                                                                                                                                                                                                                                                                                                                                                                                                                                                                                                                                                                                               | 11.43  | 62.5    | 8      | 10/25            | K537k          | (R)SSAYESLMEIVKNSAK(D) | 1756.8786                       | 114.0594                   | 8.8                         | 97170.8/4.68       | HUMAN   | Q14974      | 159221            | Importin subunit beta-1 OS=Homo sapiens GN=KPXB1 PE=1 SV=2 |                    |         |         |         |                       |         |         |                       |         |                       |          |         |         |         |         |         |         |         |         |                       |         |         |                       |         |                       |          |                         |      |      |      |      |      |      |      |      |      |      |      |      |      |      |      |      |      |      |      |      |      |      |      |      |      |                       |      |       |      |      |      |       |       |       |      |       |       |        |       |       |       |       |       |       |       |       |       |       |       |       |       |       |       |       |      |      |      |       |       |       |      |      |      |      |       |       |      |      |      |      |      |       |      |      |       |       |      |          |  |  |    |    |   |  |  |  |   |    |    |        |  |  |    |        |    |    |                   |  |    |                   |  |  |    |           |  |  |       |       |       |  |  |  |       |      |       |     |  |  |     |     |     |     |  |  |       |  |  |  |       |
| <table border="1"> <thead> <tr> <th>Fragment-ion (m/z)</th> <th>70.063</th> <th>84.077</th> <th>86.096</th> <th>87.052</th> <th>102.054</th> <th>104.052</th> <th>120.080</th> <th>129.088</th> <th>136.073</th> <th>147.076</th> <th>147.109</th> <th>157.061</th> <th>159.086</th> <th>171.110</th> <th>218.151</th> <th>228.099</th> <th>419.227</th> <th>661.365</th> <th>667.360<sup>+2</sup></th> <th>682.342</th> <th>760.417</th> <th>813.409<sup>+2</sup></th> <th>825.923</th> <th>874.501<sup>+2</sup></th> <th>1002.539</th> </tr> </thead> <tbody> <tr> <td>Frac. Inten. (% of TIC)</td> <td>0.16</td> <td>7.72</td> <td>0.52</td> <td>0.16</td> <td>0.13</td> <td>6.38</td> <td>4.33</td> <td>3.30</td> <td>0.20</td> <td>8.64</td> <td>3.60</td> <td>9.07</td> <td>4.04</td> <td>3.06</td> <td>3.32</td> <td>5.28</td> <td>4.59</td> <td>5.44</td> <td>5.02</td> <td>2.89</td> <td>7.61</td> <td>5.16</td> <td>2.82</td> <td>2.75</td> <td>3.81</td> </tr> <tr> <td>Rel. Inten. (% of BP)</td> <td>1.74</td> <td>85.10</td> <td>5.77</td> <td>1.77</td> <td>1.39</td> <td>70.35</td> <td>47.73</td> <td>36.42</td> <td>2.24</td> <td>95.24</td> <td>39.70</td> <td>100.00</td> <td>44.49</td> <td>33.71</td> <td>36.58</td> <td>58.22</td> <td>50.57</td> <td>59.96</td> <td>55.32</td> <td>31.88</td> <td>83.84</td> <td>56.84</td> <td>31.10</td> <td>30.31</td> <td>42.00</td> </tr> <tr> <td>Score</td> <td>-0.02</td> <td>-0.85</td> <td>0.22</td> <td>0.33</td> <td>1.00</td> <td>-0.70</td> <td>-0.48</td> <td>-0.36</td> <td>1.00</td> <td>0.50</td> <td>1.50</td> <td>0.25</td> <td>-0.44</td> <td>-0.34</td> <td>1.50</td> <td>0.25</td> <td>1.50</td> <td>1.50</td> <td>1.50</td> <td>-0.32</td> <td>1.50</td> <td>1.50</td> <td>-0.31</td> <td>-0.30</td> <td>1.50</td> </tr> <tr> <td>Ion-type</td> <td></td> <td></td> <td>LI</td> <td>NR</td> <td>E</td> <td></td> <td></td> <td></td> <td>Y</td> <td>a2</td> <td>y1</td> <td>b2-H2O</td> <td></td> <td></td> <td>y2</td> <td>b3-H2O</td> <td>y4</td> <td>y5</td> <td>y11<sup>+2</sup></td> <td></td> <td>y6</td> <td>a14<sup>+2</sup></td> <td></td> <td></td> <td>y8</td> </tr> <tr> <td>Delta ppm</td> <td></td> <td></td> <td>-10.8</td> <td>-37.8</td> <td>-13.3</td> <td></td> <td></td> <td></td> <td>-21.2</td> <td>-3.5</td> <td>-24.5</td> <td>3.4</td> <td></td> <td></td> <td>4.0</td> <td>6.2</td> <td>4.8</td> <td>3.2</td> <td></td> <td></td> <td>-19.3</td> <td></td> <td></td> <td></td> <td>-19.3</td> </tr> </tbody> </table> |        |         |        |                  |                |                        |                                 |                            |                             |                    |         |             |                   |                                                            | Fragment-ion (m/z) | 70.063  | 84.077  | 86.096  | 87.052                | 102.054 | 104.052 | 120.080               | 129.088 | 136.073               | 147.076  | 147.109 | 157.061 | 159.086 | 171.110 | 218.151 | 228.099 | 419.227 | 661.365 | 667.360 <sup>+2</sup> | 682.342 | 760.417 | 813.409 <sup>+2</sup> | 825.923 | 874.501 <sup>+2</sup> | 1002.539 | Frac. Inten. (% of TIC) | 0.16 | 7.72 | 0.52 | 0.16 | 0.13 | 6.38 | 4.33 | 3.30 | 0.20 | 8.64 | 3.60 | 9.07 | 4.04 | 3.06 | 3.32 | 5.28 | 4.59 | 5.44 | 5.02 | 2.89 | 7.61 | 5.16 | 2.82 | 2.75 | 3.81 | Rel. Inten. (% of BP) | 1.74 | 85.10 | 5.77 | 1.77 | 1.39 | 70.35 | 47.73 | 36.42 | 2.24 | 95.24 | 39.70 | 100.00 | 44.49 | 33.71 | 36.58 | 58.22 | 50.57 | 59.96 | 55.32 | 31.88 | 83.84 | 56.84 | 31.10 | 30.31 | 42.00 | Score | -0.02 | -0.85 | 0.22 | 0.33 | 1.00 | -0.70 | -0.48 | -0.36 | 1.00 | 0.50 | 1.50 | 0.25 | -0.44 | -0.34 | 1.50 | 0.25 | 1.50 | 1.50 | 1.50 | -0.32 | 1.50 | 1.50 | -0.31 | -0.30 | 1.50 | Ion-type |  |  | LI | NR | E |  |  |  | Y | a2 | y1 | b2-H2O |  |  | y2 | b3-H2O | y4 | y5 | y11 <sup>+2</sup> |  | y6 | a14 <sup>+2</sup> |  |  | y8 | Delta ppm |  |  | -10.8 | -37.8 | -13.3 |  |  |  | -21.2 | -3.5 | -24.5 | 3.4 |  |  | 4.0 | 6.2 | 4.8 | 3.2 |  |  | -19.3 |  |  |  | -19.3 |
| Fragment-ion (m/z)                                                                                                                                                                                                                                                                                                                                                                                                                                                                                                                                                                                                                                                                                                                                                                                                                                                                                                                                                                                                                                                                                                                                                                                                                                                                                                                                                                                                                                                                                                                                                                                                                                                                                                                                                                                                                                                                                                                                                                                                                                                                                                                                                                                                                                                                                                                                                                                                                                                                                                              | 70.063 | 84.077  | 86.096 | 87.052           | 102.054        | 104.052                | 120.080                         | 129.088                    | 136.073                     | 147.076            | 147.109 | 157.061     | 159.086           | 171.110                                                    | 218.151            | 228.099 | 419.227 | 661.365 | 667.360 <sup>+2</sup> | 682.342 | 760.417 | 813.409 <sup>+2</sup> | 825.923 | 874.501 <sup>+2</sup> | 1002.539 |         |         |         |         |         |         |         |         |                       |         |         |                       |         |                       |          |                         |      |      |      |      |      |      |      |      |      |      |      |      |      |      |      |      |      |      |      |      |      |      |      |      |      |                       |      |       |      |      |      |       |       |       |      |       |       |        |       |       |       |       |       |       |       |       |       |       |       |       |       |       |       |       |      |      |      |       |       |       |      |      |      |      |       |       |      |      |      |      |      |       |      |      |       |       |      |          |  |  |    |    |   |  |  |  |   |    |    |        |  |  |    |        |    |    |                   |  |    |                   |  |  |    |           |  |  |       |       |       |  |  |  |       |      |       |     |  |  |     |     |     |     |  |  |       |  |  |  |       |
| Frac. Inten. (% of TIC)                                                                                                                                                                                                                                                                                                                                                                                                                                                                                                                                                                                                                                                                                                                                                                                                                                                                                                                                                                                                                                                                                                                                                                                                                                                                                                                                                                                                                                                                                                                                                                                                                                                                                                                                                                                                                                                                                                                                                                                                                                                                                                                                                                                                                                                                                                                                                                                                                                                                                                         | 0.16   | 7.72    | 0.52   | 0.16             | 0.13           | 6.38                   | 4.33                            | 3.30                       | 0.20                        | 8.64               | 3.60    | 9.07        | 4.04              | 3.06                                                       | 3.32               | 5.28    | 4.59    | 5.44    | 5.02                  | 2.89    | 7.61    | 5.16                  | 2.82    | 2.75                  | 3.81     |         |         |         |         |         |         |         |         |                       |         |         |                       |         |                       |          |                         |      |      |      |      |      |      |      |      |      |      |      |      |      |      |      |      |      |      |      |      |      |      |      |      |      |                       |      |       |      |      |      |       |       |       |      |       |       |        |       |       |       |       |       |       |       |       |       |       |       |       |       |       |       |       |      |      |      |       |       |       |      |      |      |      |       |       |      |      |      |      |      |       |      |      |       |       |      |          |  |  |    |    |   |  |  |  |   |    |    |        |  |  |    |        |    |    |                   |  |    |                   |  |  |    |           |  |  |       |       |       |  |  |  |       |      |       |     |  |  |     |     |     |     |  |  |       |  |  |  |       |
| Rel. Inten. (% of BP)                                                                                                                                                                                                                                                                                                                                                                                                                                                                                                                                                                                                                                                                                                                                                                                                                                                                                                                                                                                                                                                                                                                                                                                                                                                                                                                                                                                                                                                                                                                                                                                                                                                                                                                                                                                                                                                                                                                                                                                                                                                                                                                                                                                                                                                                                                                                                                                                                                                                                                           | 1.74   | 85.10   | 5.77   | 1.77             | 1.39           | 70.35                  | 47.73                           | 36.42                      | 2.24                        | 95.24              | 39.70   | 100.00      | 44.49             | 33.71                                                      | 36.58              | 58.22   | 50.57   | 59.96   | 55.32                 | 31.88   | 83.84   | 56.84                 | 31.10   | 30.31                 | 42.00    |         |         |         |         |         |         |         |         |                       |         |         |                       |         |                       |          |                         |      |      |      |      |      |      |      |      |      |      |      |      |      |      |      |      |      |      |      |      |      |      |      |      |      |                       |      |       |      |      |      |       |       |       |      |       |       |        |       |       |       |       |       |       |       |       |       |       |       |       |       |       |       |       |      |      |      |       |       |       |      |      |      |      |       |       |      |      |      |      |      |       |      |      |       |       |      |          |  |  |    |    |   |  |  |  |   |    |    |        |  |  |    |        |    |    |                   |  |    |                   |  |  |    |           |  |  |       |       |       |  |  |  |       |      |       |     |  |  |     |     |     |     |  |  |       |  |  |  |       |
| Score                                                                                                                                                                                                                                                                                                                                                                                                                                                                                                                                                                                                                                                                                                                                                                                                                                                                                                                                                                                                                                                                                                                                                                                                                                                                                                                                                                                                                                                                                                                                                                                                                                                                                                                                                                                                                                                                                                                                                                                                                                                                                                                                                                                                                                                                                                                                                                                                                                                                                                                           | -0.02  | -0.85   | 0.22   | 0.33             | 1.00           | -0.70                  | -0.48                           | -0.36                      | 1.00                        | 0.50               | 1.50    | 0.25        | -0.44             | -0.34                                                      | 1.50               | 0.25    | 1.50    | 1.50    | 1.50                  | -0.32   | 1.50    | 1.50                  | -0.31   | -0.30                 | 1.50     |         |         |         |         |         |         |         |         |                       |         |         |                       |         |                       |          |                         |      |      |      |      |      |      |      |      |      |      |      |      |      |      |      |      |      |      |      |      |      |      |      |      |      |                       |      |       |      |      |      |       |       |       |      |       |       |        |       |       |       |       |       |       |       |       |       |       |       |       |       |       |       |       |      |      |      |       |       |       |      |      |      |      |       |       |      |      |      |      |      |       |      |      |       |       |      |          |  |  |    |    |   |  |  |  |   |    |    |        |  |  |    |        |    |    |                   |  |    |                   |  |  |    |           |  |  |       |       |       |  |  |  |       |      |       |     |  |  |     |     |     |     |  |  |       |  |  |  |       |
| Ion-type                                                                                                                                                                                                                                                                                                                                                                                                                                                                                                                                                                                                                                                                                                                                                                                                                                                                                                                                                                                                                                                                                                                                                                                                                                                                                                                                                                                                                                                                                                                                                                                                                                                                                                                                                                                                                                                                                                                                                                                                                                                                                                                                                                                                                                                                                                                                                                                                                                                                                                                        |        |         | LI     | NR               | E              |                        |                                 |                            | Y                           | a2                 | y1      | b2-H2O      |                   |                                                            | y2                 | b3-H2O  | y4      | y5      | y11 <sup>+2</sup>     |         | y6      | a14 <sup>+2</sup>     |         |                       | y8       |         |         |         |         |         |         |         |         |                       |         |         |                       |         |                       |          |                         |      |      |      |      |      |      |      |      |      |      |      |      |      |      |      |      |      |      |      |      |      |      |      |      |      |                       |      |       |      |      |      |       |       |       |      |       |       |        |       |       |       |       |       |       |       |       |       |       |       |       |       |       |       |       |      |      |      |       |       |       |      |      |      |      |       |       |      |      |      |      |      |       |      |      |       |       |      |          |  |  |    |    |   |  |  |  |   |    |    |        |  |  |    |        |    |    |                   |  |    |                   |  |  |    |           |  |  |       |       |       |  |  |  |       |      |       |     |  |  |     |     |     |     |  |  |       |  |  |  |       |
| Delta ppm                                                                                                                                                                                                                                                                                                                                                                                                                                                                                                                                                                                                                                                                                                                                                                                                                                                                                                                                                                                                                                                                                                                                                                                                                                                                                                                                                                                                                                                                                                                                                                                                                                                                                                                                                                                                                                                                                                                                                                                                                                                                                                                                                                                                                                                                                                                                                                                                                                                                                                                       |        |         | -10.8  | -37.8            | -13.3          |                        |                                 |                            | -21.2                       | -3.5               | -24.5   | 3.4         |                   |                                                            | 4.0                | 6.2     | 4.8     | 3.2     |                       |         | -19.3   |                       |         |                       | -19.3    |         |         |         |         |         |         |         |         |                       |         |         |                       |         |                       |          |                         |      |      |      |      |      |      |      |      |      |      |      |      |      |      |      |      |      |      |      |      |      |      |      |      |      |                       |      |       |      |      |      |       |       |       |      |       |       |        |       |       |       |       |       |       |       |       |       |       |       |       |       |       |       |       |      |      |      |       |       |       |      |      |      |      |       |       |      |      |      |      |      |       |      |      |       |       |      |          |  |  |    |    |   |  |  |  |   |    |    |        |  |  |    |        |    |    |                   |  |    |                   |  |  |    |           |  |  |       |       |       |  |  |  |       |      |       |     |  |  |     |     |     |     |  |  |       |  |  |  |       |

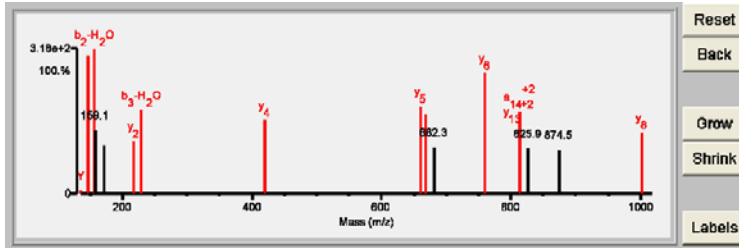

Result Summary

| Rank | Score | SPI (%) | BCS | # Unmatched Ions | Variable sites | Sequence                   | MH <sup>+</sup> Calculated (Da) | MH <sup>+</sup> Error (Da) | MH <sup>+</sup> Error (ppm) | Protein MW/pi (Da) | Species | Accession # | Protein Name                                               |
|------|-------|---------|-----|------------------|----------------|----------------------------|---------------------------------|----------------------------|-----------------------------|--------------------|---------|-------------|------------------------------------------------------------|
| 1    | 19.41 | 90.5    | 10  | 3/25             | K730k          | (K)KYLEVVLNTLQQASQAQVDK(S) | 2275.2292                       | 114.0652                   | 9.3                         | 97170.8/4.68       | HUMAN   | Q14974      | Importin subunit beta-1 OS=Homo sapiens GN=KPXB1 PE=1 SV=2 |

Detailed Results

| Rank                    | Score | SPI (%) | BCS    | # Unmatched Ions | Variable sites | Sequence                           | MH <sup>+</sup> Calculated (Da) | MH <sup>+</sup> Error (Da) | MH <sup>+</sup> Error (ppm) | Protein MW/pi (Da) | Species | Accession # | MS-Digest Index # | Protein Name                                               |         |                       |                      |                       |                       |                       |         |         |         |         |          |          |
|-------------------------|-------|---------|--------|------------------|----------------|------------------------------------|---------------------------------|----------------------------|-----------------------------|--------------------|---------|-------------|-------------------|------------------------------------------------------------|---------|-----------------------|----------------------|-----------------------|-----------------------|-----------------------|---------|---------|---------|---------|----------|----------|
| 1                       | 19.41 | 90.5    | 10     | 3/25             | K730k          | (K)KYLEVVLNTL/Q/Q/A/SQA/Q/V/D/K(S) | 2275.2292                       | 114.0652                   | 9.3                         | 97170.8/4.68       | HUMAN   | Q14974      | 318441            | Importin subunit beta-1 OS=Homo sapiens GN=KPXB1 PE=1 SV=2 |         |                       |                      |                       |                       |                       |         |         |         |         |          |          |
| Fragment-ion (m/z)      |       | 72.080  | 84.042 | 84.080           | 86.097         | 101.070                            | 147.109                         | 257.127                    | 262.143                     | 311.159            | 328.172 | 361.208     | 461.209           | 471.265                                                    | 489.266 | 542.761 <sup>+2</sup> | 567.301              | 578.829 <sup>+2</sup> | 587.836 <sup>+2</sup> | 772.411 <sup>+2</sup> | 775.395 | 846.460 | 957.470 | 974.506 | 1085.550 | 1102.558 |
| Frac. Inten. (% of TIC) |       | 0.12    | 0.12   | 0.27             | 0.50           | 0.11                               | 4.96                            | 3.09                       | 5.19                        | 3.14               | 3.75    | 5.47        | 3.31              | 3.12                                                       | 4.02    | 4.25                  | 3.01                 | 3.04                  | 7.93                  | 3.25                  | 6.47    | 11.67   | 6.88    | 7.79    | 3.32     | 5.20     |
| Rel. Inten. (% of BP)   |       | 1.03    | 1.03   | 2.33             | 4.25           | 0.96                               | 42.54                           | 26.52                      | 44.47                       | 26.91              | 32.15   | 46.84       | 28.38             | 26.72                                                      | 34.47   | 36.47                 | 25.82                | 26.06                 | 68.00                 | 27.83                 | 55.49   | 100.00  | 59.01   | 66.74   | 28.46    | 44.61    |
| Score                   |       | 0.50    | 1.00   | 0.50             | 0.22           | 1.50                               | 1.50                            | 0.75                       | 1.50                        | -0.27              | 0.75    | 1.50        | -0.28             | 0.75                                                       | 1.50    | 0.50                  | -0.26                | 0.25                  | 0.50                  | 1.50                  | 1.50    | 1.50    | 0.50    | 1.50    | 0.50     | 1.50     |
| Ion-type                |       | V       | E      | KQ               | LI             | KQ                                 | y1                              | QQ                         | y2                          | QAQ                | y3      | y4-H2O      | y4                | y10+H2O <sup>+2</sup>                                      | y4      | y10+H2O <sup>+2</sup> | b9+H2O <sup>+2</sup> | b9 <sup>+2</sup>      | b12 <sup>+2</sup>     | y7                    | b6      | y9-NH3  | y6      | y10-NH3 | y10      |          |
| Delta ppm               |       | -16.3   | -23.7  | -8.0             | 0.9            |                                    | -26.5                           | 5.7                        | 13.9                        |                    | 27.9    | -0.4        |                   | 18.7                                                       | -1.7    | -21.1                 | 11.7                 | 14.1                  | -22.7                 | 0.2                   | -15.2   | 6.8     | 15.9    | 25.4    | 8.5      |          |

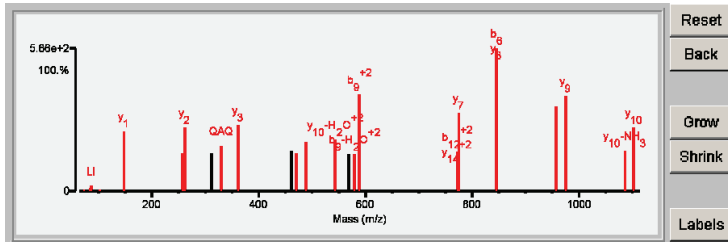

Reset  
Back  
Grow  
Shrink  
Labels



Result Summary

| Rank | Score | SPI (%) | BCS | # Unmatched Ions | Variable sites | Sequence                  | MH <sup>+</sup> Calculated (Da) | MH <sup>+</sup> Error (Da) | MH <sup>+</sup> Error (ppm) | Protein MW/pI (Da) | Species | Accession #            | Protein Name                                                                             |
|------|-------|---------|-----|------------------|----------------|---------------------------|---------------------------------|----------------------------|-----------------------------|--------------------|---------|------------------------|------------------------------------------------------------------------------------------|
| 1    | 22.96 | 92.3    | 9   | 4/25             | K213k          | (R)LLVPTQYVGAIGKEGATIR(N) | 2099.2223                       | 114.0498                   | 3.1                         | 63456.8/9.26       | HUMAN   | <a href="#">Q9NZI8</a> | Insulin-like growth factor 2 mRNA-binding protein 1 OS=Homo sapiens GN=IGF2BP1 PE=1 SV=1 |
| 2    | 9.06  | 82.0    | 2   | 14/25            | K164k K166k    | (K)LLVKVDAKTKAQLDEWVK(A)  | 1985.1430                       | 228.1292                   | 19.6                        | 100186.0/6.06      | HUMAN   | <a href="#">P49756</a> | RNA-binding protein 25 OS=Homo sapiens GN=RBM25 PE=1 SV=3                                |
| 2    | 9.06  | 82.0    | 2   | 14/25            | K166k K173k    | (K)LLVKVDAKTKAQLDEWVK(A)  | 1985.1430                       | 228.1292                   | 19.6                        | 100186.0/6.06      | HUMAN   | <a href="#">P49756</a> | RNA-binding protein 25 OS=Homo sapiens GN=RBM25 PE=1 SV=3                                |
| 2    | 9.06  | 82.0    | 2   | 14/25            | K164k K173k    | (K)LLVKVDAKTKAQLDEWVK(A)  | 1985.1430                       | 228.1292                   | 19.6                        | 100186.0/6.06      | HUMAN   | <a href="#">P49756</a> | RNA-binding protein 25 OS=Homo sapiens GN=RBM25 PE=1 SV=3                                |
| 3    | 8.24  | 80.2    | 2   | 15/25            | K160k K173k    | (K)LLVKVDAKTKAQLDEWVK(A)  | 1985.1430                       | 228.1292                   | 19.6                        | 100186.0/6.06      | HUMAN   | <a href="#">P49756</a> | RNA-binding protein 25 OS=Homo sapiens GN=RBM25 PE=1 SV=3                                |

Detailed Results

| Rank                                                                                                                                                                                                                                                                                                                                                                                                                                                                                                                                                                                                                                                                                                                                                                                                                                                                                                                                                                                                                                                                                                                                                                                                                                                                                                                                                                                                                                                                                                                                                                                                                                                                                                                                                                                                                                                                                                                                                                                                                                                                                                                                                                                                                                                                                                                                                                                                                                                                                                                                                                                                                                                                                                                                                                                                                                                                                                                                                                                                                                                                                                                                                                                                                                                                                                                                                                                                       | Score  | SPI (%)        | BCS            | # Unmatched Ions | Variable sites | Sequence                                                | MH <sup>+</sup> Calculated (Da) | MH <sup>+</sup> Error (Da) | MH <sup>+</sup> Error (ppm)  | Protein MW/pI (Da)           | Species                                         | Accession #                   | MS-Digest Index #                               | Protein Name                                                                             |                    |                               |                               |                                                 |                               |                                                 |                               |                               |                |                               |          |                                                 |           |                               |           |                               |           |                |         |                 |         |           |           |           |          |          |                        |      |      |      |       |      |      |      |      |      |      |      |       |      |      |      |      |      |      |      |      |      |      |        |       |      |      |                      |      |       |       |       |      |      |      |      |      |      |      |       |      |       |      |       |      |      |      |      |      |        |       |      |      |       |      |      |      |      |       |      |      |      |      |      |      |      |      |      |      |       |      |       |      |       |      |      |      |      |      |          |   |                |                |                |                |                              |                              |       |                              |       |                                                 |                               |                |                               |         |                               |                               |                                                 |                               |                                                 |                               |                               |                |                 |           |      |     |     |     |    |     |                              |      |      |                              |     |      |                                                 |      |     |      |                               |      |         |     |     |                               |     |                               |       |                                                 |      |                               |     |                               |     |                |     |                 |     |
|------------------------------------------------------------------------------------------------------------------------------------------------------------------------------------------------------------------------------------------------------------------------------------------------------------------------------------------------------------------------------------------------------------------------------------------------------------------------------------------------------------------------------------------------------------------------------------------------------------------------------------------------------------------------------------------------------------------------------------------------------------------------------------------------------------------------------------------------------------------------------------------------------------------------------------------------------------------------------------------------------------------------------------------------------------------------------------------------------------------------------------------------------------------------------------------------------------------------------------------------------------------------------------------------------------------------------------------------------------------------------------------------------------------------------------------------------------------------------------------------------------------------------------------------------------------------------------------------------------------------------------------------------------------------------------------------------------------------------------------------------------------------------------------------------------------------------------------------------------------------------------------------------------------------------------------------------------------------------------------------------------------------------------------------------------------------------------------------------------------------------------------------------------------------------------------------------------------------------------------------------------------------------------------------------------------------------------------------------------------------------------------------------------------------------------------------------------------------------------------------------------------------------------------------------------------------------------------------------------------------------------------------------------------------------------------------------------------------------------------------------------------------------------------------------------------------------------------------------------------------------------------------------------------------------------------------------------------------------------------------------------------------------------------------------------------------------------------------------------------------------------------------------------------------------------------------------------------------------------------------------------------------------------------------------------------------------------------------------------------------------------------------------------|--------|----------------|----------------|------------------|----------------|---------------------------------------------------------|---------------------------------|----------------------------|------------------------------|------------------------------|-------------------------------------------------|-------------------------------|-------------------------------------------------|------------------------------------------------------------------------------------------|--------------------|-------------------------------|-------------------------------|-------------------------------------------------|-------------------------------|-------------------------------------------------|-------------------------------|-------------------------------|----------------|-------------------------------|----------|-------------------------------------------------|-----------|-------------------------------|-----------|-------------------------------|-----------|----------------|---------|-----------------|---------|-----------|-----------|-----------|----------|----------|------------------------|------|------|------|-------|------|------|------|------|------|------|------|-------|------|------|------|------|------|------|------|------|------|------|--------|-------|------|------|----------------------|------|-------|-------|-------|------|------|------|------|------|------|------|-------|------|-------|------|-------|------|------|------|------|------|--------|-------|------|------|-------|------|------|------|------|-------|------|------|------|------|------|------|------|------|------|------|-------|------|-------|------|-------|------|------|------|------|------|----------|---|----------------|----------------|----------------|----------------|------------------------------|------------------------------|-------|------------------------------|-------|-------------------------------------------------|-------------------------------|----------------|-------------------------------|---------|-------------------------------|-------------------------------|-------------------------------------------------|-------------------------------|-------------------------------------------------|-------------------------------|-------------------------------|----------------|-----------------|-----------|------|-----|-----|-----|----|-----|------------------------------|------|------|------------------------------|-----|------|-------------------------------------------------|------|-----|------|-------------------------------|------|---------|-----|-----|-------------------------------|-----|-------------------------------|-------|-------------------------------------------------|------|-------------------------------|-----|-------------------------------|-----|----------------|-----|-----------------|-----|
| 1                                                                                                                                                                                                                                                                                                                                                                                                                                                                                                                                                                                                                                                                                                                                                                                                                                                                                                                                                                                                                                                                                                                                                                                                                                                                                                                                                                                                                                                                                                                                                                                                                                                                                                                                                                                                                                                                                                                                                                                                                                                                                                                                                                                                                                                                                                                                                                                                                                                                                                                                                                                                                                                                                                                                                                                                                                                                                                                                                                                                                                                                                                                                                                                                                                                                                                                                                                                                          | 22.96  | 92.3           | 9              | 4/25             | K213k          | (R) L L V P T Q Y V G A I V I G K E / E G A T I R ( N ) | 2099.2223                       | 114.0498                   | 3.1                          | 63456.8/9.26                 | HUMAN                                           | <a href="#">Q9NZI8</a>        | <a href="#">309997</a>                          | Insulin-like growth factor 2 mRNA-binding protein 1 OS=Homo sapiens GN=IGF2BP1 PE=1 SV=1 |                    |                               |                               |                                                 |                               |                                                 |                               |                               |                |                               |          |                                                 |           |                               |           |                               |           |                |         |                 |         |           |           |           |          |          |                        |      |      |      |       |      |      |      |      |      |      |      |       |      |      |      |      |      |      |      |      |      |      |        |       |      |      |                      |      |       |       |       |      |      |      |      |      |      |      |       |      |       |      |       |      |      |      |      |      |        |       |      |      |       |      |      |      |      |       |      |      |      |      |      |      |      |      |      |      |       |      |       |      |       |      |      |      |      |      |          |   |                |                |                |                |                              |                              |       |                              |       |                                                 |                               |                |                               |         |                               |                               |                                                 |                               |                                                 |                               |                               |                |                 |           |      |     |     |     |    |     |                              |      |      |                              |     |      |                                                 |      |     |      |                               |      |         |     |     |                               |     |                               |       |                                                 |      |                               |     |                               |     |                |     |                 |     |
| <table border="1"> <thead> <tr> <th>Fragment-ion (m/z)</th> <th>72.082</th> <th>86.097</th> <th>199.182</th> <th>227.177</th> <th>228.178</th> <th>326.244</th> <th>473.265*2</th> <th>517.306</th> <th>529.804*2</th> <th>589.297</th> <th>624.025*3</th> <th>630.016*3</th> <th>646.348</th> <th>663.036*3</th> <th>717.359</th> <th>730.381*2</th> <th>781.441*2</th> <th>830.433</th> <th>845.451*2</th> <th>887.490</th> <th>935.506*2</th> <th>944.521*2</th> <th>994.055*2</th> <th>1058.598</th> <th>1299.738</th> </tr> </thead> <tbody> <tr> <td>Frac. Inten.(% of TIC)</td> <td>0.04</td> <td>4.10</td> <td>5.15</td> <td>13.64</td> <td>1.83</td> <td>2.25</td> <td>0.96</td> <td>1.28</td> <td>1.23</td> <td>1.33</td> <td>1.11</td> <td>14.96</td> <td>1.18</td> <td>7.71</td> <td>0.91</td> <td>4.06</td> <td>0.97</td> <td>0.98</td> <td>0.91</td> <td>0.84</td> <td>3.22</td> <td>3.55</td> <td>100.00</td> <td>20.10</td> <td>4.48</td> <td>3.94</td> </tr> <tr> <td>Rel. Inten.(% of BP)</td> <td>0.15</td> <td>15.87</td> <td>19.87</td> <td>52.12</td> <td>7.00</td> <td>8.61</td> <td>3.66</td> <td>4.89</td> <td>4.70</td> <td>5.09</td> <td>4.26</td> <td>57.19</td> <td>4.50</td> <td>29.48</td> <td>3.48</td> <td>15.51</td> <td>3.70</td> <td>3.74</td> <td>3.49</td> <td>3.22</td> <td>3.55</td> <td>100.00</td> <td>20.10</td> <td>4.48</td> <td>3.94</td> </tr> <tr> <td>Score</td> <td>0.50</td> <td>0.50</td> <td>0.50</td> <td>0.75</td> <td>-0.07</td> <td>0.50</td> <td>1.50</td> <td>1.50</td> <td>1.50</td> <td>0.75</td> <td>1.50</td> <td>1.50</td> <td>1.50</td> <td>1.50</td> <td>0.75</td> <td>-0.16</td> <td>1.50</td> <td>-0.04</td> <td>1.50</td> <td>-0.03</td> <td>0.50</td> <td>1.50</td> <td>1.50</td> <td>1.50</td> <td>1.50</td> </tr> <tr> <td>Ion-type</td> <td>V</td> <td>a<sub>1</sub></td> <td>a<sub>2</sub></td> <td>b<sub>2</sub></td> <td>b<sub>3</sub></td> <td>y<sub>6</sub><sup>+2</sup></td> <td>y<sub>9</sub><sup>+2</sup></td> <td>PTQYV</td> <td>y<sub>9</sub><sup>+2</sup></td> <td>PTQYV</td> <td>y<sub>17</sub>-H<sub>2</sub>O<sup>+3</sup></td> <td>y<sub>17</sub><sup>+3</sup></td> <td>y<sub>6</sub></td> <td>y<sub>18</sub><sup>+3</sup></td> <td>PTQYVGA</td> <td>y<sub>14</sub><sup>+2</sup></td> <td>y<sub>15</sub><sup>+2</sup></td> <td>y<sub>17</sub>-H<sub>2</sub>O<sup>+2</sup></td> <td>y<sub>15</sub><sup>+2</sup></td> <td>y<sub>17</sub>-H<sub>2</sub>O<sup>+2</sup></td> <td>y<sub>17</sub><sup>+2</sup></td> <td>y<sub>18</sub><sup>+2</sup></td> <td>y<sub>9</sub></td> <td>y<sub>12</sub></td> </tr> <tr> <td>Delta ppm</td> <td>18.4</td> <td>6.7</td> <td>6.6</td> <td>5.7</td> <td>II</td> <td>0.9</td> <td>y<sub>6</sub><sup>+2</sup></td> <td>11.7</td> <td>-6.7</td> <td>y<sub>9</sub><sup>+2</sup></td> <td>5.5</td> <td>-1.4</td> <td>y<sub>17</sub>-H<sub>2</sub>O<sup>+3</sup></td> <td>22.3</td> <td>2.4</td> <td>-6.6</td> <td>y<sub>18</sub><sup>+3</sup></td> <td>-2.4</td> <td>PTQYVGA</td> <td>3.7</td> <td>3.0</td> <td>y<sub>14</sub><sup>+2</sup></td> <td>3.0</td> <td>y<sub>15</sub><sup>+2</sup></td> <td>-19.5</td> <td>y<sub>17</sub>-H<sub>2</sub>O<sup>+2</sup></td> <td>-5.1</td> <td>y<sub>17</sub><sup>+2</sup></td> <td>3.1</td> <td>y<sub>18</sub><sup>+2</sup></td> <td>2.5</td> <td>y<sub>9</sub></td> <td>2.8</td> <td>y<sub>12</sub></td> <td>0.4</td> </tr> </tbody> </table> |        |                |                |                  |                |                                                         |                                 |                            |                              |                              |                                                 |                               |                                                 |                                                                                          | Fragment-ion (m/z) | 72.082                        | 86.097                        | 199.182                                         | 227.177                       | 228.178                                         | 326.244                       | 473.265*2                     | 517.306        | 529.804*2                     | 589.297  | 624.025*3                                       | 630.016*3 | 646.348                       | 663.036*3 | 717.359                       | 730.381*2 | 781.441*2      | 830.433 | 845.451*2       | 887.490 | 935.506*2 | 944.521*2 | 994.055*2 | 1058.598 | 1299.738 | Frac. Inten.(% of TIC) | 0.04 | 4.10 | 5.15 | 13.64 | 1.83 | 2.25 | 0.96 | 1.28 | 1.23 | 1.33 | 1.11 | 14.96 | 1.18 | 7.71 | 0.91 | 4.06 | 0.97 | 0.98 | 0.91 | 0.84 | 3.22 | 3.55 | 100.00 | 20.10 | 4.48 | 3.94 | Rel. Inten.(% of BP) | 0.15 | 15.87 | 19.87 | 52.12 | 7.00 | 8.61 | 3.66 | 4.89 | 4.70 | 5.09 | 4.26 | 57.19 | 4.50 | 29.48 | 3.48 | 15.51 | 3.70 | 3.74 | 3.49 | 3.22 | 3.55 | 100.00 | 20.10 | 4.48 | 3.94 | Score | 0.50 | 0.50 | 0.50 | 0.75 | -0.07 | 0.50 | 1.50 | 1.50 | 1.50 | 0.75 | 1.50 | 1.50 | 1.50 | 1.50 | 0.75 | -0.16 | 1.50 | -0.04 | 1.50 | -0.03 | 0.50 | 1.50 | 1.50 | 1.50 | 1.50 | Ion-type | V | a <sub>1</sub> | a <sub>2</sub> | b <sub>2</sub> | b <sub>3</sub> | y <sub>6</sub> <sup>+2</sup> | y <sub>9</sub> <sup>+2</sup> | PTQYV | y <sub>9</sub> <sup>+2</sup> | PTQYV | y <sub>17</sub> -H <sub>2</sub> O <sup>+3</sup> | y <sub>17</sub> <sup>+3</sup> | y <sub>6</sub> | y <sub>18</sub> <sup>+3</sup> | PTQYVGA | y <sub>14</sub> <sup>+2</sup> | y <sub>15</sub> <sup>+2</sup> | y <sub>17</sub> -H <sub>2</sub> O <sup>+2</sup> | y <sub>15</sub> <sup>+2</sup> | y <sub>17</sub> -H <sub>2</sub> O <sup>+2</sup> | y <sub>17</sub> <sup>+2</sup> | y <sub>18</sub> <sup>+2</sup> | y <sub>9</sub> | y <sub>12</sub> | Delta ppm | 18.4 | 6.7 | 6.6 | 5.7 | II | 0.9 | y <sub>6</sub> <sup>+2</sup> | 11.7 | -6.7 | y <sub>9</sub> <sup>+2</sup> | 5.5 | -1.4 | y <sub>17</sub> -H <sub>2</sub> O <sup>+3</sup> | 22.3 | 2.4 | -6.6 | y <sub>18</sub> <sup>+3</sup> | -2.4 | PTQYVGA | 3.7 | 3.0 | y <sub>14</sub> <sup>+2</sup> | 3.0 | y <sub>15</sub> <sup>+2</sup> | -19.5 | y <sub>17</sub> -H <sub>2</sub> O <sup>+2</sup> | -5.1 | y <sub>17</sub> <sup>+2</sup> | 3.1 | y <sub>18</sub> <sup>+2</sup> | 2.5 | y <sub>9</sub> | 2.8 | y <sub>12</sub> | 0.4 |
| Fragment-ion (m/z)                                                                                                                                                                                                                                                                                                                                                                                                                                                                                                                                                                                                                                                                                                                                                                                                                                                                                                                                                                                                                                                                                                                                                                                                                                                                                                                                                                                                                                                                                                                                                                                                                                                                                                                                                                                                                                                                                                                                                                                                                                                                                                                                                                                                                                                                                                                                                                                                                                                                                                                                                                                                                                                                                                                                                                                                                                                                                                                                                                                                                                                                                                                                                                                                                                                                                                                                                                                         | 72.082 | 86.097         | 199.182        | 227.177          | 228.178        | 326.244                                                 | 473.265*2                       | 517.306                    | 529.804*2                    | 589.297                      | 624.025*3                                       | 630.016*3                     | 646.348                                         | 663.036*3                                                                                | 717.359            | 730.381*2                     | 781.441*2                     | 830.433                                         | 845.451*2                     | 887.490                                         | 935.506*2                     | 944.521*2                     | 994.055*2      | 1058.598                      | 1299.738 |                                                 |           |                               |           |                               |           |                |         |                 |         |           |           |           |          |          |                        |      |      |      |       |      |      |      |      |      |      |      |       |      |      |      |      |      |      |      |      |      |      |        |       |      |      |                      |      |       |       |       |      |      |      |      |      |      |      |       |      |       |      |       |      |      |      |      |      |        |       |      |      |       |      |      |      |      |       |      |      |      |      |      |      |      |      |      |      |       |      |       |      |       |      |      |      |      |      |          |   |                |                |                |                |                              |                              |       |                              |       |                                                 |                               |                |                               |         |                               |                               |                                                 |                               |                                                 |                               |                               |                |                 |           |      |     |     |     |    |     |                              |      |      |                              |     |      |                                                 |      |     |      |                               |      |         |     |     |                               |     |                               |       |                                                 |      |                               |     |                               |     |                |     |                 |     |
| Frac. Inten.(% of TIC)                                                                                                                                                                                                                                                                                                                                                                                                                                                                                                                                                                                                                                                                                                                                                                                                                                                                                                                                                                                                                                                                                                                                                                                                                                                                                                                                                                                                                                                                                                                                                                                                                                                                                                                                                                                                                                                                                                                                                                                                                                                                                                                                                                                                                                                                                                                                                                                                                                                                                                                                                                                                                                                                                                                                                                                                                                                                                                                                                                                                                                                                                                                                                                                                                                                                                                                                                                                     | 0.04   | 4.10           | 5.15           | 13.64            | 1.83           | 2.25                                                    | 0.96                            | 1.28                       | 1.23                         | 1.33                         | 1.11                                            | 14.96                         | 1.18                                            | 7.71                                                                                     | 0.91               | 4.06                          | 0.97                          | 0.98                                            | 0.91                          | 0.84                                            | 3.22                          | 3.55                          | 100.00         | 20.10                         | 4.48     | 3.94                                            |           |                               |           |                               |           |                |         |                 |         |           |           |           |          |          |                        |      |      |      |       |      |      |      |      |      |      |      |       |      |      |      |      |      |      |      |      |      |      |        |       |      |      |                      |      |       |       |       |      |      |      |      |      |      |      |       |      |       |      |       |      |      |      |      |      |        |       |      |      |       |      |      |      |      |       |      |      |      |      |      |      |      |      |      |      |       |      |       |      |       |      |      |      |      |      |          |   |                |                |                |                |                              |                              |       |                              |       |                                                 |                               |                |                               |         |                               |                               |                                                 |                               |                                                 |                               |                               |                |                 |           |      |     |     |     |    |     |                              |      |      |                              |     |      |                                                 |      |     |      |                               |      |         |     |     |                               |     |                               |       |                                                 |      |                               |     |                               |     |                |     |                 |     |
| Rel. Inten.(% of BP)                                                                                                                                                                                                                                                                                                                                                                                                                                                                                                                                                                                                                                                                                                                                                                                                                                                                                                                                                                                                                                                                                                                                                                                                                                                                                                                                                                                                                                                                                                                                                                                                                                                                                                                                                                                                                                                                                                                                                                                                                                                                                                                                                                                                                                                                                                                                                                                                                                                                                                                                                                                                                                                                                                                                                                                                                                                                                                                                                                                                                                                                                                                                                                                                                                                                                                                                                                                       | 0.15   | 15.87          | 19.87          | 52.12            | 7.00           | 8.61                                                    | 3.66                            | 4.89                       | 4.70                         | 5.09                         | 4.26                                            | 57.19                         | 4.50                                            | 29.48                                                                                    | 3.48               | 15.51                         | 3.70                          | 3.74                                            | 3.49                          | 3.22                                            | 3.55                          | 100.00                        | 20.10          | 4.48                          | 3.94     |                                                 |           |                               |           |                               |           |                |         |                 |         |           |           |           |          |          |                        |      |      |      |       |      |      |      |      |      |      |      |       |      |      |      |      |      |      |      |      |      |      |        |       |      |      |                      |      |       |       |       |      |      |      |      |      |      |      |       |      |       |      |       |      |      |      |      |      |        |       |      |      |       |      |      |      |      |       |      |      |      |      |      |      |      |      |      |      |       |      |       |      |       |      |      |      |      |      |          |   |                |                |                |                |                              |                              |       |                              |       |                                                 |                               |                |                               |         |                               |                               |                                                 |                               |                                                 |                               |                               |                |                 |           |      |     |     |     |    |     |                              |      |      |                              |     |      |                                                 |      |     |      |                               |      |         |     |     |                               |     |                               |       |                                                 |      |                               |     |                               |     |                |     |                 |     |
| Score                                                                                                                                                                                                                                                                                                                                                                                                                                                                                                                                                                                                                                                                                                                                                                                                                                                                                                                                                                                                                                                                                                                                                                                                                                                                                                                                                                                                                                                                                                                                                                                                                                                                                                                                                                                                                                                                                                                                                                                                                                                                                                                                                                                                                                                                                                                                                                                                                                                                                                                                                                                                                                                                                                                                                                                                                                                                                                                                                                                                                                                                                                                                                                                                                                                                                                                                                                                                      | 0.50   | 0.50           | 0.50           | 0.75             | -0.07          | 0.50                                                    | 1.50                            | 1.50                       | 1.50                         | 0.75                         | 1.50                                            | 1.50                          | 1.50                                            | 1.50                                                                                     | 0.75               | -0.16                         | 1.50                          | -0.04                                           | 1.50                          | -0.03                                           | 0.50                          | 1.50                          | 1.50           | 1.50                          | 1.50     |                                                 |           |                               |           |                               |           |                |         |                 |         |           |           |           |          |          |                        |      |      |      |       |      |      |      |      |      |      |      |       |      |      |      |      |      |      |      |      |      |      |        |       |      |      |                      |      |       |       |       |      |      |      |      |      |      |      |       |      |       |      |       |      |      |      |      |      |        |       |      |      |       |      |      |      |      |       |      |      |      |      |      |      |      |      |      |      |       |      |       |      |       |      |      |      |      |      |          |   |                |                |                |                |                              |                              |       |                              |       |                                                 |                               |                |                               |         |                               |                               |                                                 |                               |                                                 |                               |                               |                |                 |           |      |     |     |     |    |     |                              |      |      |                              |     |      |                                                 |      |     |      |                               |      |         |     |     |                               |     |                               |       |                                                 |      |                               |     |                               |     |                |     |                 |     |
| Ion-type                                                                                                                                                                                                                                                                                                                                                                                                                                                                                                                                                                                                                                                                                                                                                                                                                                                                                                                                                                                                                                                                                                                                                                                                                                                                                                                                                                                                                                                                                                                                                                                                                                                                                                                                                                                                                                                                                                                                                                                                                                                                                                                                                                                                                                                                                                                                                                                                                                                                                                                                                                                                                                                                                                                                                                                                                                                                                                                                                                                                                                                                                                                                                                                                                                                                                                                                                                                                   | V      | a <sub>1</sub> | a <sub>2</sub> | b <sub>2</sub>   | b <sub>3</sub> | y <sub>6</sub> <sup>+2</sup>                            | y <sub>9</sub> <sup>+2</sup>    | PTQYV                      | y <sub>9</sub> <sup>+2</sup> | PTQYV                        | y <sub>17</sub> -H <sub>2</sub> O <sup>+3</sup> | y <sub>17</sub> <sup>+3</sup> | y <sub>6</sub>                                  | y <sub>18</sub> <sup>+3</sup>                                                            | PTQYVGA            | y <sub>14</sub> <sup>+2</sup> | y <sub>15</sub> <sup>+2</sup> | y <sub>17</sub> -H <sub>2</sub> O <sup>+2</sup> | y <sub>15</sub> <sup>+2</sup> | y <sub>17</sub> -H <sub>2</sub> O <sup>+2</sup> | y <sub>17</sub> <sup>+2</sup> | y <sub>18</sub> <sup>+2</sup> | y <sub>9</sub> | y <sub>12</sub>               |          |                                                 |           |                               |           |                               |           |                |         |                 |         |           |           |           |          |          |                        |      |      |      |       |      |      |      |      |      |      |      |       |      |      |      |      |      |      |      |      |      |      |        |       |      |      |                      |      |       |       |       |      |      |      |      |      |      |      |       |      |       |      |       |      |      |      |      |      |        |       |      |      |       |      |      |      |      |       |      |      |      |      |      |      |      |      |      |      |       |      |       |      |       |      |      |      |      |      |          |   |                |                |                |                |                              |                              |       |                              |       |                                                 |                               |                |                               |         |                               |                               |                                                 |                               |                                                 |                               |                               |                |                 |           |      |     |     |     |    |     |                              |      |      |                              |     |      |                                                 |      |     |      |                               |      |         |     |     |                               |     |                               |       |                                                 |      |                               |     |                               |     |                |     |                 |     |
| Delta ppm                                                                                                                                                                                                                                                                                                                                                                                                                                                                                                                                                                                                                                                                                                                                                                                                                                                                                                                                                                                                                                                                                                                                                                                                                                                                                                                                                                                                                                                                                                                                                                                                                                                                                                                                                                                                                                                                                                                                                                                                                                                                                                                                                                                                                                                                                                                                                                                                                                                                                                                                                                                                                                                                                                                                                                                                                                                                                                                                                                                                                                                                                                                                                                                                                                                                                                                                                                                                  | 18.4   | 6.7            | 6.6            | 5.7              | II             | 0.9                                                     | y <sub>6</sub> <sup>+2</sup>    | 11.7                       | -6.7                         | y <sub>9</sub> <sup>+2</sup> | 5.5                                             | -1.4                          | y <sub>17</sub> -H <sub>2</sub> O <sup>+3</sup> | 22.3                                                                                     | 2.4                | -6.6                          | y <sub>18</sub> <sup>+3</sup> | -2.4                                            | PTQYVGA                       | 3.7                                             | 3.0                           | y <sub>14</sub> <sup>+2</sup> | 3.0            | y <sub>15</sub> <sup>+2</sup> | -19.5    | y <sub>17</sub> -H <sub>2</sub> O <sup>+2</sup> | -5.1      | y <sub>17</sub> <sup>+2</sup> | 3.1       | y <sub>18</sub> <sup>+2</sup> | 2.5       | y <sub>9</sub> | 2.8     | y <sub>12</sub> | 0.4     |           |           |           |          |          |                        |      |      |      |       |      |      |      |      |      |      |      |       |      |      |      |      |      |      |      |      |      |      |        |       |      |      |                      |      |       |       |       |      |      |      |      |      |      |      |       |      |       |      |       |      |      |      |      |      |        |       |      |      |       |      |      |      |      |       |      |      |      |      |      |      |      |      |      |      |       |      |       |      |       |      |      |      |      |      |          |   |                |                |                |                |                              |                              |       |                              |       |                                                 |                               |                |                               |         |                               |                               |                                                 |                               |                                                 |                               |                               |                |                 |           |      |     |     |     |    |     |                              |      |      |                              |     |      |                                                 |      |     |      |                               |      |         |     |     |                               |     |                               |       |                                                 |      |                               |     |                               |     |                |     |                 |     |

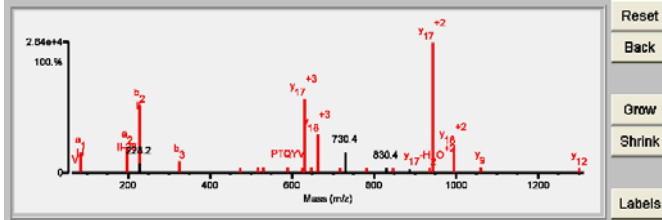

Result Summary

| Rank | Score | SP1 (%) | BCS | # Unmatched Ions | Variable sites | Sequence            | MH <sup>+</sup> Calculated (Da) | MH <sup>+</sup> Error (Da) | MH <sup>+</sup> Error (ppm) | Protein MW/pl (Da) | Species | Accession # | Protein Name                                                                                  |
|------|-------|---------|-----|------------------|----------------|---------------------|---------------------------------|----------------------------|-----------------------------|--------------------|---------|-------------|-----------------------------------------------------------------------------------------------|
| 1    | 18.12 | 83.4    | 7   | 7/25             | K450k          | (K)IAPPETPDSkVR(M)  | 1309.7110                       | 114.0412                   | -1.2                        | 63456.8/9.26       | HUMAN   | Q9NZI8      | Insulin-like growth factor 2 mRNA-binding protein 1 OS=Homo sapiens GN=IGF2BP1 PE=1 SV=1      |
| 2    | 6.18  | 67.5    | 3   | 15/25            | None           | (R)ASNFKPGSYPSR(Y)  | 1423.7328                       | 0.0194                     | 13.6                        | 59379.9/10.10      | HUMAN   | RQ14498     | REVERSE RNA-binding protein 39 OS=Homo sapiens GN=RBM39 PE=1 SV=2                             |
| 3    | 5.53  | 64.2    | 2   | 16/25            | None           | (K)LARTGNFFLTQQR(A) | 1423.7805                       | -0.0282                    | -19.8                       | 42785.5/5.92       | HUMAN   | RQ8NF26     | REVERSE Cell adhesion molecule 4 OS=Homo sapiens GN=CAD4 PE=1 SV=1                            |
| 4    | 5.02  | 66.5    | 2   | 16/25            | None           | (R)ALEELGEEELHKR(E) | 1423.7640                       | -0.0017                    | -1.2                        | 150587.8/6.37      | HUMAN   | Q2M1P5      | Kinesin-like protein KIF7 OS=Homo sapiens GN=KIF7 PE=1 SV=2                                   |
| 5    | 4.98  | 60.7    | 2   | 17/25            | None           | (R)LAEEAPSGPEVRR(I) | 1423.7652                       | -0.0130                    | -9.1                        | 37413.9/7.91       | HUMAN   | RQ15599     | REVERSE Na(+)/H(+) exchange regulatory cofactor NHE-RF2 OS=Homo sapiens GN=SLC9A3R2 PE=1 SV=2 |

Detailed Results

| Rank                                                                                                                                                                                                                                                                                                                                                                                                                                                                                                                                                                                                                                                                                                                                                                                                                                                                                                                                                                                                                                                                                                                                                                                                                                                                                                                                                                                                                                                                                                                                                                                                                                                                                                                                                                                                                                                                                                                                                                                                                                                                                                                                                                                                                                                                                                                                                                                                                                                                                                                                                                                               | Score  | SP1 (%) | BCS    | # Unmatched Ions | Variable sites | Sequence                         | MH <sup>+</sup> Calculated (Da) | MH <sup>+</sup> Error (Da) | MH <sup>+</sup> Error (ppm) | Protein MW/pl (Da) | Species | Accession #           | MS-Digest Index #     | Protein Name                                                                             |                    |         |                       |         |         |                       |         |         |         |         |         |         |                       |                       |                       |         |         |                       |         |         |                       |         |         |         |         |         |                        |      |      |       |      |      |      |      |      |      |      |      |      |      |       |      |      |      |      |      |       |      |      |      |      |      |                      |      |       |       |       |      |      |       |      |      |      |      |      |       |       |      |       |       |      |       |        |       |      |      |      |       |       |      |       |      |      |      |      |      |      |      |       |       |       |      |      |       |      |      |       |      |      |      |      |      |       |      |          |    |  |    |    |    |    |    |    |     |  |  |                  |                  |                   |  |      |                  |  |    |                   |        |       |    |    |           |     |  |      |      |      |     |      |     |     |  |  |  |  |       |  |      |     |  |     |      |       |      |     |  |       |
|----------------------------------------------------------------------------------------------------------------------------------------------------------------------------------------------------------------------------------------------------------------------------------------------------------------------------------------------------------------------------------------------------------------------------------------------------------------------------------------------------------------------------------------------------------------------------------------------------------------------------------------------------------------------------------------------------------------------------------------------------------------------------------------------------------------------------------------------------------------------------------------------------------------------------------------------------------------------------------------------------------------------------------------------------------------------------------------------------------------------------------------------------------------------------------------------------------------------------------------------------------------------------------------------------------------------------------------------------------------------------------------------------------------------------------------------------------------------------------------------------------------------------------------------------------------------------------------------------------------------------------------------------------------------------------------------------------------------------------------------------------------------------------------------------------------------------------------------------------------------------------------------------------------------------------------------------------------------------------------------------------------------------------------------------------------------------------------------------------------------------------------------------------------------------------------------------------------------------------------------------------------------------------------------------------------------------------------------------------------------------------------------------------------------------------------------------------------------------------------------------------------------------------------------------------------------------------------------------|--------|---------|--------|------------------|----------------|----------------------------------|---------------------------------|----------------------------|-----------------------------|--------------------|---------|-----------------------|-----------------------|------------------------------------------------------------------------------------------|--------------------|---------|-----------------------|---------|---------|-----------------------|---------|---------|---------|---------|---------|---------|-----------------------|-----------------------|-----------------------|---------|---------|-----------------------|---------|---------|-----------------------|---------|---------|---------|---------|---------|------------------------|------|------|-------|------|------|------|------|------|------|------|------|------|------|-------|------|------|------|------|------|-------|------|------|------|------|------|----------------------|------|-------|-------|-------|------|------|-------|------|------|------|------|------|-------|-------|------|-------|-------|------|-------|--------|-------|------|------|------|-------|-------|------|-------|------|------|------|------|------|------|------|-------|-------|-------|------|------|-------|------|------|-------|------|------|------|------|------|-------|------|----------|----|--|----|----|----|----|----|----|-----|--|--|------------------|------------------|-------------------|--|------|------------------|--|----|-------------------|--------|-------|----|----|-----------|-----|--|------|------|------|-----|------|-----|-----|--|--|--|--|-------|--|------|-----|--|-----|------|-------|------|-----|--|-------|
| 1                                                                                                                                                                                                                                                                                                                                                                                                                                                                                                                                                                                                                                                                                                                                                                                                                                                                                                                                                                                                                                                                                                                                                                                                                                                                                                                                                                                                                                                                                                                                                                                                                                                                                                                                                                                                                                                                                                                                                                                                                                                                                                                                                                                                                                                                                                                                                                                                                                                                                                                                                                                                  | 18.12  | 83.4    | 7      | 7/25             | K450k          | (K)I A I P P E T P D S k V R (M) | 1309.7110                       | 114.0412                   | -1.2                        | 63456.8/9.26       | HUMAN   | Q9NZI8                | 309997                | Insulin-like growth factor 2 mRNA-binding protein 1 OS=Homo sapiens GN=IGF2BP1 PE=1 SV=1 |                    |         |                       |         |         |                       |         |         |         |         |         |         |                       |                       |                       |         |         |                       |         |         |                       |         |         |         |         |         |                        |      |      |       |      |      |      |      |      |      |      |      |      |      |       |      |      |      |      |      |       |      |      |      |      |      |                      |      |       |       |       |      |      |       |      |      |      |      |      |       |       |      |       |       |      |       |        |       |      |      |      |       |       |      |       |      |      |      |      |      |      |      |       |       |       |      |      |       |      |      |       |      |      |      |      |      |       |      |          |    |  |    |    |    |    |    |    |     |  |  |                  |                  |                   |  |      |                  |  |    |                   |        |       |    |    |           |     |  |      |      |      |     |      |     |     |  |  |  |  |       |  |      |     |  |     |      |       |      |     |  |       |
| <table border="1"> <thead> <tr> <th>Fragment-ion (m/z)</th> <th>70.066</th> <th>84.082</th> <th>86.097</th> <th>157.133</th> <th>175.117</th> <th>185.131</th> <th>227.103</th> <th>274.189</th> <th>324.159</th> <th>369.197</th> <th>375.870</th> <th>389.211<sup>+3</sup></th> <th>408.212<sup>+2</sup></th> <th>413.877<sup>+3</sup></th> <th>413.994</th> <th>425.202</th> <th>571.799<sup>+2</sup></th> <th>580.982</th> <th>603.361</th> <th>620.319<sup>+2</sup></th> <th>637.276</th> <th>643.313</th> <th>718.386</th> <th>740.355</th> <th>815.426</th> </tr> </thead> <tbody> <tr> <td>Frac. Inten.(% of TIC)</td> <td>0.01</td> <td>6.84</td> <td>17.75</td> <td>5.31</td> <td>1.72</td> <td>1.93</td> <td>2.96</td> <td>1.77</td> <td>1.57</td> <td>1.99</td> <td>1.42</td> <td>1.59</td> <td>2.79</td> <td>10.99</td> <td>1.72</td> <td>2.33</td> <td>3.79</td> <td>1.39</td> <td>2.94</td> <td>20.00</td> <td>2.24</td> <td>1.48</td> <td>1.51</td> <td>1.63</td> <td>2.35</td> </tr> <tr> <td>Rel. Inten.(% of BP)</td> <td>0.07</td> <td>34.19</td> <td>88.72</td> <td>26.53</td> <td>8.62</td> <td>9.66</td> <td>14.79</td> <td>8.83</td> <td>7.87</td> <td>9.97</td> <td>7.11</td> <td>7.95</td> <td>13.93</td> <td>54.93</td> <td>8.57</td> <td>11.66</td> <td>18.94</td> <td>6.93</td> <td>14.68</td> <td>100.00</td> <td>11.19</td> <td>7.38</td> <td>7.53</td> <td>8.15</td> <td>11.73</td> </tr> <tr> <td>Score</td> <td>0.20</td> <td>-0.34</td> <td>0.50</td> <td>0.50</td> <td>1.50</td> <td>0.50</td> <td>0.75</td> <td>1.50</td> <td>0.75</td> <td>-0.10</td> <td>-0.07</td> <td>-0.08</td> <td>1.50</td> <td>1.50</td> <td>-0.09</td> <td>0.75</td> <td>1.50</td> <td>-0.07</td> <td>1.50</td> <td>1.50</td> <td>0.75</td> <td>0.75</td> <td>1.50</td> <td>-0.08</td> <td>1.50</td> </tr> <tr> <td>Ion-type</td> <td>PR</td> <td></td> <td>a1</td> <td>a2</td> <td>y1</td> <td>b2</td> <td>PE</td> <td>y2</td> <td>PPE</td> <td></td> <td></td> <td>y6<sup>+2</sup></td> <td>y6<sup>+2</sup></td> <td>y10<sup>+3</sup></td> <td></td> <td>PETP</td> <td>y9<sup>+2</sup></td> <td></td> <td>y4</td> <td>y10<sup>+2</sup></td> <td>PPETPD</td> <td>TPDSk</td> <td>y5</td> <td>y6</td> </tr> <tr> <td>Delta ppm</td> <td>6.8</td> <td></td> <td>-9.6</td> <td>-9.8</td> <td>-8.9</td> <td>5.1</td> <td>-4.1</td> <td>6.0</td> <td>6.8</td> <td></td> <td></td> <td></td> <td></td> <td>-23.6</td> <td></td> <td>-5.1</td> <td>9.7</td> <td></td> <td>5.3</td> <td>-1.0</td> <td>-12.4</td> <td>12.2</td> <td>2.5</td> <td></td> <td>-14.1</td> </tr> </tbody> </table> |        |         |        |                  |                |                                  |                                 |                            |                             |                    |         |                       |                       |                                                                                          | Fragment-ion (m/z) | 70.066  | 84.082                | 86.097  | 157.133 | 175.117               | 185.131 | 227.103 | 274.189 | 324.159 | 369.197 | 375.870 | 389.211 <sup>+3</sup> | 408.212 <sup>+2</sup> | 413.877 <sup>+3</sup> | 413.994 | 425.202 | 571.799 <sup>+2</sup> | 580.982 | 603.361 | 620.319 <sup>+2</sup> | 637.276 | 643.313 | 718.386 | 740.355 | 815.426 | Frac. Inten.(% of TIC) | 0.01 | 6.84 | 17.75 | 5.31 | 1.72 | 1.93 | 2.96 | 1.77 | 1.57 | 1.99 | 1.42 | 1.59 | 2.79 | 10.99 | 1.72 | 2.33 | 3.79 | 1.39 | 2.94 | 20.00 | 2.24 | 1.48 | 1.51 | 1.63 | 2.35 | Rel. Inten.(% of BP) | 0.07 | 34.19 | 88.72 | 26.53 | 8.62 | 9.66 | 14.79 | 8.83 | 7.87 | 9.97 | 7.11 | 7.95 | 13.93 | 54.93 | 8.57 | 11.66 | 18.94 | 6.93 | 14.68 | 100.00 | 11.19 | 7.38 | 7.53 | 8.15 | 11.73 | Score | 0.20 | -0.34 | 0.50 | 0.50 | 1.50 | 0.50 | 0.75 | 1.50 | 0.75 | -0.10 | -0.07 | -0.08 | 1.50 | 1.50 | -0.09 | 0.75 | 1.50 | -0.07 | 1.50 | 1.50 | 0.75 | 0.75 | 1.50 | -0.08 | 1.50 | Ion-type | PR |  | a1 | a2 | y1 | b2 | PE | y2 | PPE |  |  | y6 <sup>+2</sup> | y6 <sup>+2</sup> | y10 <sup>+3</sup> |  | PETP | y9 <sup>+2</sup> |  | y4 | y10 <sup>+2</sup> | PPETPD | TPDSk | y5 | y6 | Delta ppm | 6.8 |  | -9.6 | -9.8 | -8.9 | 5.1 | -4.1 | 6.0 | 6.8 |  |  |  |  | -23.6 |  | -5.1 | 9.7 |  | 5.3 | -1.0 | -12.4 | 12.2 | 2.5 |  | -14.1 |
| Fragment-ion (m/z)                                                                                                                                                                                                                                                                                                                                                                                                                                                                                                                                                                                                                                                                                                                                                                                                                                                                                                                                                                                                                                                                                                                                                                                                                                                                                                                                                                                                                                                                                                                                                                                                                                                                                                                                                                                                                                                                                                                                                                                                                                                                                                                                                                                                                                                                                                                                                                                                                                                                                                                                                                                 | 70.066 | 84.082  | 86.097 | 157.133          | 175.117        | 185.131                          | 227.103                         | 274.189                    | 324.159                     | 369.197            | 375.870 | 389.211 <sup>+3</sup> | 408.212 <sup>+2</sup> | 413.877 <sup>+3</sup>                                                                    | 413.994            | 425.202 | 571.799 <sup>+2</sup> | 580.982 | 603.361 | 620.319 <sup>+2</sup> | 637.276 | 643.313 | 718.386 | 740.355 | 815.426 |         |                       |                       |                       |         |         |                       |         |         |                       |         |         |         |         |         |                        |      |      |       |      |      |      |      |      |      |      |      |      |      |       |      |      |      |      |      |       |      |      |      |      |      |                      |      |       |       |       |      |      |       |      |      |      |      |      |       |       |      |       |       |      |       |        |       |      |      |      |       |       |      |       |      |      |      |      |      |      |      |       |       |       |      |      |       |      |      |       |      |      |      |      |      |       |      |          |    |  |    |    |    |    |    |    |     |  |  |                  |                  |                   |  |      |                  |  |    |                   |        |       |    |    |           |     |  |      |      |      |     |      |     |     |  |  |  |  |       |  |      |     |  |     |      |       |      |     |  |       |
| Frac. Inten.(% of TIC)                                                                                                                                                                                                                                                                                                                                                                                                                                                                                                                                                                                                                                                                                                                                                                                                                                                                                                                                                                                                                                                                                                                                                                                                                                                                                                                                                                                                                                                                                                                                                                                                                                                                                                                                                                                                                                                                                                                                                                                                                                                                                                                                                                                                                                                                                                                                                                                                                                                                                                                                                                             | 0.01   | 6.84    | 17.75  | 5.31             | 1.72           | 1.93                             | 2.96                            | 1.77                       | 1.57                        | 1.99               | 1.42    | 1.59                  | 2.79                  | 10.99                                                                                    | 1.72               | 2.33    | 3.79                  | 1.39    | 2.94    | 20.00                 | 2.24    | 1.48    | 1.51    | 1.63    | 2.35    |         |                       |                       |                       |         |         |                       |         |         |                       |         |         |         |         |         |                        |      |      |       |      |      |      |      |      |      |      |      |      |      |       |      |      |      |      |      |       |      |      |      |      |      |                      |      |       |       |       |      |      |       |      |      |      |      |      |       |       |      |       |       |      |       |        |       |      |      |      |       |       |      |       |      |      |      |      |      |      |      |       |       |       |      |      |       |      |      |       |      |      |      |      |      |       |      |          |    |  |    |    |    |    |    |    |     |  |  |                  |                  |                   |  |      |                  |  |    |                   |        |       |    |    |           |     |  |      |      |      |     |      |     |     |  |  |  |  |       |  |      |     |  |     |      |       |      |     |  |       |
| Rel. Inten.(% of BP)                                                                                                                                                                                                                                                                                                                                                                                                                                                                                                                                                                                                                                                                                                                                                                                                                                                                                                                                                                                                                                                                                                                                                                                                                                                                                                                                                                                                                                                                                                                                                                                                                                                                                                                                                                                                                                                                                                                                                                                                                                                                                                                                                                                                                                                                                                                                                                                                                                                                                                                                                                               | 0.07   | 34.19   | 88.72  | 26.53            | 8.62           | 9.66                             | 14.79                           | 8.83                       | 7.87                        | 9.97               | 7.11    | 7.95                  | 13.93                 | 54.93                                                                                    | 8.57               | 11.66   | 18.94                 | 6.93    | 14.68   | 100.00                | 11.19   | 7.38    | 7.53    | 8.15    | 11.73   |         |                       |                       |                       |         |         |                       |         |         |                       |         |         |         |         |         |                        |      |      |       |      |      |      |      |      |      |      |      |      |      |       |      |      |      |      |      |       |      |      |      |      |      |                      |      |       |       |       |      |      |       |      |      |      |      |      |       |       |      |       |       |      |       |        |       |      |      |      |       |       |      |       |      |      |      |      |      |      |      |       |       |       |      |      |       |      |      |       |      |      |      |      |      |       |      |          |    |  |    |    |    |    |    |    |     |  |  |                  |                  |                   |  |      |                  |  |    |                   |        |       |    |    |           |     |  |      |      |      |     |      |     |     |  |  |  |  |       |  |      |     |  |     |      |       |      |     |  |       |
| Score                                                                                                                                                                                                                                                                                                                                                                                                                                                                                                                                                                                                                                                                                                                                                                                                                                                                                                                                                                                                                                                                                                                                                                                                                                                                                                                                                                                                                                                                                                                                                                                                                                                                                                                                                                                                                                                                                                                                                                                                                                                                                                                                                                                                                                                                                                                                                                                                                                                                                                                                                                                              | 0.20   | -0.34   | 0.50   | 0.50             | 1.50           | 0.50                             | 0.75                            | 1.50                       | 0.75                        | -0.10              | -0.07   | -0.08                 | 1.50                  | 1.50                                                                                     | -0.09              | 0.75    | 1.50                  | -0.07   | 1.50    | 1.50                  | 0.75    | 0.75    | 1.50    | -0.08   | 1.50    |         |                       |                       |                       |         |         |                       |         |         |                       |         |         |         |         |         |                        |      |      |       |      |      |      |      |      |      |      |      |      |      |       |      |      |      |      |      |       |      |      |      |      |      |                      |      |       |       |       |      |      |       |      |      |      |      |      |       |       |      |       |       |      |       |        |       |      |      |      |       |       |      |       |      |      |      |      |      |      |      |       |       |       |      |      |       |      |      |       |      |      |      |      |      |       |      |          |    |  |    |    |    |    |    |    |     |  |  |                  |                  |                   |  |      |                  |  |    |                   |        |       |    |    |           |     |  |      |      |      |     |      |     |     |  |  |  |  |       |  |      |     |  |     |      |       |      |     |  |       |
| Ion-type                                                                                                                                                                                                                                                                                                                                                                                                                                                                                                                                                                                                                                                                                                                                                                                                                                                                                                                                                                                                                                                                                                                                                                                                                                                                                                                                                                                                                                                                                                                                                                                                                                                                                                                                                                                                                                                                                                                                                                                                                                                                                                                                                                                                                                                                                                                                                                                                                                                                                                                                                                                           | PR     |         | a1     | a2               | y1             | b2                               | PE                              | y2                         | PPE                         |                    |         | y6 <sup>+2</sup>      | y6 <sup>+2</sup>      | y10 <sup>+3</sup>                                                                        |                    | PETP    | y9 <sup>+2</sup>      |         | y4      | y10 <sup>+2</sup>     | PPETPD  | TPDSk   | y5      | y6      |         |         |                       |                       |                       |         |         |                       |         |         |                       |         |         |         |         |         |                        |      |      |       |      |      |      |      |      |      |      |      |      |      |       |      |      |      |      |      |       |      |      |      |      |      |                      |      |       |       |       |      |      |       |      |      |      |      |      |       |       |      |       |       |      |       |        |       |      |      |      |       |       |      |       |      |      |      |      |      |      |      |       |       |       |      |      |       |      |      |       |      |      |      |      |      |       |      |          |    |  |    |    |    |    |    |    |     |  |  |                  |                  |                   |  |      |                  |  |    |                   |        |       |    |    |           |     |  |      |      |      |     |      |     |     |  |  |  |  |       |  |      |     |  |     |      |       |      |     |  |       |
| Delta ppm                                                                                                                                                                                                                                                                                                                                                                                                                                                                                                                                                                                                                                                                                                                                                                                                                                                                                                                                                                                                                                                                                                                                                                                                                                                                                                                                                                                                                                                                                                                                                                                                                                                                                                                                                                                                                                                                                                                                                                                                                                                                                                                                                                                                                                                                                                                                                                                                                                                                                                                                                                                          | 6.8    |         | -9.6   | -9.8             | -8.9           | 5.1                              | -4.1                            | 6.0                        | 6.8                         |                    |         |                       |                       | -23.6                                                                                    |                    | -5.1    | 9.7                   |         | 5.3     | -1.0                  | -12.4   | 12.2    | 2.5     |         | -14.1   |         |                       |                       |                       |         |         |                       |         |         |                       |         |         |         |         |         |                        |      |      |       |      |      |      |      |      |      |      |      |      |      |       |      |      |      |      |      |       |      |      |      |      |      |                      |      |       |       |       |      |      |       |      |      |      |      |      |       |       |      |       |       |      |       |        |       |      |      |      |       |       |      |       |      |      |      |      |      |      |      |       |       |       |      |      |       |      |      |       |      |      |      |      |      |       |      |          |    |  |    |    |    |    |    |    |     |  |  |                  |                  |                   |  |      |                  |  |    |                   |        |       |    |    |           |     |  |      |      |      |     |      |     |     |  |  |  |  |       |  |      |     |  |     |      |       |      |     |  |       |

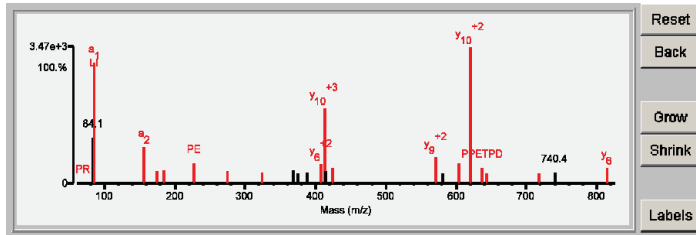

Result Summary

| Rank | Score | SPI (%) | BCS | # Unmatched Ions | Variable sites | Sequence                    | MH <sup>+</sup> Calculated (Da) | MH <sup>+</sup> Error (Da) | MH <sup>+</sup> Error (ppm) | Protein MW (Da) | Species | Accession # | Protein Name                                                                                            |
|------|-------|---------|-----|------------------|----------------|-----------------------------|---------------------------------|----------------------------|-----------------------------|-----------------|---------|-------------|---------------------------------------------------------------------------------------------------------|
| 1    | 18.88 | 82.1    | 8   | 7/25             | K141k          | (K)ILPTLEAVAAALGNKVVESLR(A) | 2093.2329                       | 114.0780                   | 15.9                        | 43290.6/5.19    | HUMAN   | Q12905      | Interleukin enhancer-binding factor 2 OS=Homo sapiens GN=ILF2 PE=1 SV=2                                 |
| 2    | 7.15  | 66.3    | 2   | 15/25            | K585k          | (K)LLEKVPVDTGWGLLIGKSR(T)   | 2093.2693                       | 114.0416                   | -0.6                        | 124153.0/5.53   | HUMAN   | RQ8I2S8     | REVERSE Voltage-dependent calcium channel subunit alpha-2/delta-3 OS=Homo sapiens GN=CACNA2D3 PE=1 SV=1 |
| 2    | 7.15  | 66.3    | 2   | 15/25            | K599k          | (K)LLEKVPVDTGWGLLIGKSR(T)   | 2093.2693                       | 114.0416                   | -0.6                        | 124153.0/5.53   | HUMAN   | RQ8I2S8     | REVERSE Voltage-dependent calcium channel subunit alpha-2/delta-3 OS=Homo sapiens GN=CACNA2D3 PE=1 SV=1 |
| 3    | 6.63  | 64.7    | 3   | 16/25            | K65k K67k      | (K)LLLLTCGIWLLHIGKTK(E)     | 1979.1874                       | 228.1234                   | 17.0                        | 13618.4/9.15    | HUMAN   | RQ9B299     | REVERSE Putative transcript Y 11 protein OS=Homo sapiens GN=TTY11 PE=5 SV=1                             |
| 4    | 6.54  | 62.8    | 2   | 16/25            | None           | (R)LIKEALSYRGLQHLILALR(Q)   | 2207.3387                       | -0.0278                    | -12.6                       | 95035.5/6.45    | HUMAN   | RQ86TV6     | REVERSE Tetraatricopeptide repeat protein 7B OS=Homo sapiens GN=TTCT7B PE=1 SV=3                        |

Detailed Results

| Rank                                                                                                                                                                                                                                                                                                                                                                                                                                                                                                                                                                                                                                                                                                                                                                                                                                                                                                                                                                                                                                                                                                                                                                                                                                                                                                                                                                                                                                                                                                                                                                                                                                                                                                                                                                                                                                                                                                                                                                                                                                                                                                                                                                                                                                                                                                                                                                                                                                                                                                                                                                                                                                                                                                                                                                 | Score  | SPI (%) | BCS    | # Unmatched Ions | Variable sites | Sequence                                        | MH <sup>+</sup> Calculated (Da) | MH <sup>+</sup> Error (Da) | MH <sup>+</sup> Error (ppm) | Protein MW (Da) | Species | Accession # | MS-Digest Index # | Protein Name                                                            |                    |           |         |         |         |         |           |         |         |         |          |         |           |         |           |           |           |         |         |         |         |           |         |         |         |          |                        |      |      |      |      |      |      |      |      |      |      |      |      |      |      |       |      |      |      |      |      |      |      |      |      |      |                      |      |      |       |      |      |      |       |      |      |      |      |      |      |       |        |      |      |      |      |      |       |      |       |       |      |       |      |       |      |      |      |      |      |       |      |      |      |      |      |       |      |       |      |      |      |      |      |       |      |       |      |          |    |  |    |    |    |    |    |  |    |      |    |      |    |  |     |    |       |    |       |  |  |  |  |    |  |           |       |  |     |      |      |     |      |  |      |      |       |      |      |  |      |  |      |     |       |  |  |  |  |     |      |  |  |  |     |       |    |  |  |  |  |  |  |  |  |  |  |  |  |  |  |  |  |  |  |  |  |
|----------------------------------------------------------------------------------------------------------------------------------------------------------------------------------------------------------------------------------------------------------------------------------------------------------------------------------------------------------------------------------------------------------------------------------------------------------------------------------------------------------------------------------------------------------------------------------------------------------------------------------------------------------------------------------------------------------------------------------------------------------------------------------------------------------------------------------------------------------------------------------------------------------------------------------------------------------------------------------------------------------------------------------------------------------------------------------------------------------------------------------------------------------------------------------------------------------------------------------------------------------------------------------------------------------------------------------------------------------------------------------------------------------------------------------------------------------------------------------------------------------------------------------------------------------------------------------------------------------------------------------------------------------------------------------------------------------------------------------------------------------------------------------------------------------------------------------------------------------------------------------------------------------------------------------------------------------------------------------------------------------------------------------------------------------------------------------------------------------------------------------------------------------------------------------------------------------------------------------------------------------------------------------------------------------------------------------------------------------------------------------------------------------------------------------------------------------------------------------------------------------------------------------------------------------------------------------------------------------------------------------------------------------------------------------------------------------------------------------------------------------------------|--------|---------|--------|------------------|----------------|-------------------------------------------------|---------------------------------|----------------------------|-----------------------------|-----------------|---------|-------------|-------------------|-------------------------------------------------------------------------|--------------------|-----------|---------|---------|---------|---------|-----------|---------|---------|---------|----------|---------|-----------|---------|-----------|-----------|-----------|---------|---------|---------|---------|-----------|---------|---------|---------|----------|------------------------|------|------|------|------|------|------|------|------|------|------|------|------|------|------|-------|------|------|------|------|------|------|------|------|------|------|----------------------|------|------|-------|------|------|------|-------|------|------|------|------|------|------|-------|--------|------|------|------|------|------|-------|------|-------|-------|------|-------|------|-------|------|------|------|------|------|-------|------|------|------|------|------|-------|------|-------|------|------|------|------|------|-------|------|-------|------|----------|----|--|----|----|----|----|----|--|----|------|----|------|----|--|-----|----|-------|----|-------|--|--|--|--|----|--|-----------|-------|--|-----|------|------|-----|------|--|------|------|-------|------|------|--|------|--|------|-----|-------|--|--|--|--|-----|------|--|--|--|-----|-------|----|--|--|--|--|--|--|--|--|--|--|--|--|--|--|--|--|--|--|--|--|
| 1                                                                                                                                                                                                                                                                                                                                                                                                                                                                                                                                                                                                                                                                                                                                                                                                                                                                                                                                                                                                                                                                                                                                                                                                                                                                                                                                                                                                                                                                                                                                                                                                                                                                                                                                                                                                                                                                                                                                                                                                                                                                                                                                                                                                                                                                                                                                                                                                                                                                                                                                                                                                                                                                                                                                                                    | 18.88  | 82.1    | 8      | 7/25             | K141k          | (K) I L P T L E A V A A L G N K V V E S L R (A) | 2093.2329                       | 114.0780                   | 15.9                        | 43290.6/5.19    | HUMAN   | Q12905      | 315817            | Interleukin enhancer-binding factor 2 OS=Homo sapiens GN=ILF2 PE=1 SV=2 |                    |           |         |         |         |         |           |         |         |         |          |         |           |         |           |           |           |         |         |         |         |           |         |         |         |          |                        |      |      |      |      |      |      |      |      |      |      |      |      |      |      |       |      |      |      |      |      |      |      |      |      |      |                      |      |      |       |      |      |      |       |      |      |      |      |      |      |       |        |      |      |      |      |      |       |      |       |       |      |       |      |       |      |      |      |      |      |       |      |      |      |      |      |       |      |       |      |      |      |      |      |       |      |       |      |          |    |  |    |    |    |    |    |  |    |      |    |      |    |  |     |    |       |    |       |  |  |  |  |    |  |           |       |  |     |      |      |     |      |  |      |      |       |      |      |  |      |  |      |     |       |  |  |  |  |     |      |  |  |  |     |       |    |  |  |  |  |  |  |  |  |  |  |  |  |  |  |  |  |  |  |  |  |
| <table border="1"> <thead> <tr> <th>Fragment-ion (m/z)</th> <th>70.064</th> <th>84.080</th> <th>86.097</th> <th>171.116</th> <th>175.117</th> <th>199.110</th> <th>199.179</th> <th>200.184</th> <th>227.174</th> <th>441.249</th> <th>504.268</th> <th>558.322*2</th> <th>603.356</th> <th>655.418*3</th> <th>661.053*3</th> <th>662.376*2</th> <th>685.887</th> <th>702.418</th> <th>753.428</th> <th>771.436</th> <th>835.467*2</th> <th>982.568</th> <th>991.051</th> <th>991.575</th> <th>1115.634</th> </tr> </thead> <tbody> <tr> <td>Frac. Inten.(% of TIC)</td> <td>0.00</td> <td>2.07</td> <td>7.40</td> <td>1.90</td> <td>1.30</td> <td>2.20</td> <td>7.69</td> <td>1.35</td> <td>2.82</td> <td>1.43</td> <td>1.77</td> <td>1.66</td> <td>2.82</td> <td>3.49</td> <td>31.55</td> <td>1.78</td> <td>2.49</td> <td>1.88</td> <td>1.31</td> <td>1.56</td> <td>3.20</td> <td>1.47</td> <td>8.79</td> <td>6.14</td> <td>1.90</td> </tr> <tr> <td>Rel. Inten.(% of BP)</td> <td>0.01</td> <td>6.57</td> <td>23.47</td> <td>6.03</td> <td>4.11</td> <td>6.98</td> <td>24.38</td> <td>4.29</td> <td>8.94</td> <td>4.54</td> <td>5.61</td> <td>5.26</td> <td>8.95</td> <td>11.07</td> <td>100.00</td> <td>5.65</td> <td>7.89</td> <td>5.96</td> <td>4.17</td> <td>4.95</td> <td>10.14</td> <td>4.67</td> <td>27.86</td> <td>19.47</td> <td>6.02</td> </tr> <tr> <td>Score</td> <td>0.20</td> <td>-0.07</td> <td>0.50</td> <td>0.75</td> <td>1.50</td> <td>0.75</td> <td>0.50</td> <td>-0.04</td> <td>0.50</td> <td>0.75</td> <td>1.50</td> <td>1.50</td> <td>1.50</td> <td>-0.11</td> <td>1.50</td> <td>-0.06</td> <td>1.50</td> <td>1.50</td> <td>0.50</td> <td>0.50</td> <td>1.50</td> <td>-0.05</td> <td>1.50</td> <td>-0.19</td> <td>1.50</td> </tr> <tr> <td>Ion-type</td> <td>PR</td> <td></td> <td>a1</td> <td>LG</td> <td>y1</td> <td>PT</td> <td>a2</td> <td></td> <td>b2</td> <td>PTLE</td> <td>y3</td> <td>y3+2</td> <td>y3</td> <td></td> <td>y18</td> <td>+3</td> <td>y**12</td> <td>y3</td> <td>b**14</td> <td></td> <td></td> <td></td> <td></td> <td>y9</td> <td></td> </tr> <tr> <td>Delta ppm</td> <td>-13.2</td> <td></td> <td>5.5</td> <td>19.8</td> <td>-9.4</td> <td>8.9</td> <td>-5.0</td> <td></td> <td>-4.0</td> <td>33.1</td> <td>-19.9</td> <td>18.3</td> <td>17.3</td> <td></td> <td>19.0</td> <td></td> <td>-6.1</td> <td>5.7</td> <td>-12.9</td> <td></td> <td></td> <td></td> <td></td> <td>2.5</td> <td>-6.7</td> </tr> <tr> <td></td> <td></td> <td></td> <td>5.5</td> <td>PT-28</td> <td>LI</td> <td></td> </tr> </tbody> </table> |        |         |        |                  |                |                                                 |                                 |                            |                             |                 |         |             |                   |                                                                         | Fragment-ion (m/z) | 70.064    | 84.080  | 86.097  | 171.116 | 175.117 | 199.110   | 199.179 | 200.184 | 227.174 | 441.249  | 504.268 | 558.322*2 | 603.356 | 655.418*3 | 661.053*3 | 662.376*2 | 685.887 | 702.418 | 753.428 | 771.436 | 835.467*2 | 982.568 | 991.051 | 991.575 | 1115.634 | Frac. Inten.(% of TIC) | 0.00 | 2.07 | 7.40 | 1.90 | 1.30 | 2.20 | 7.69 | 1.35 | 2.82 | 1.43 | 1.77 | 1.66 | 2.82 | 3.49 | 31.55 | 1.78 | 2.49 | 1.88 | 1.31 | 1.56 | 3.20 | 1.47 | 8.79 | 6.14 | 1.90 | Rel. Inten.(% of BP) | 0.01 | 6.57 | 23.47 | 6.03 | 4.11 | 6.98 | 24.38 | 4.29 | 8.94 | 4.54 | 5.61 | 5.26 | 8.95 | 11.07 | 100.00 | 5.65 | 7.89 | 5.96 | 4.17 | 4.95 | 10.14 | 4.67 | 27.86 | 19.47 | 6.02 | Score | 0.20 | -0.07 | 0.50 | 0.75 | 1.50 | 0.75 | 0.50 | -0.04 | 0.50 | 0.75 | 1.50 | 1.50 | 1.50 | -0.11 | 1.50 | -0.06 | 1.50 | 1.50 | 0.50 | 0.50 | 1.50 | -0.05 | 1.50 | -0.19 | 1.50 | Ion-type | PR |  | a1 | LG | y1 | PT | a2 |  | b2 | PTLE | y3 | y3+2 | y3 |  | y18 | +3 | y**12 | y3 | b**14 |  |  |  |  | y9 |  | Delta ppm | -13.2 |  | 5.5 | 19.8 | -9.4 | 8.9 | -5.0 |  | -4.0 | 33.1 | -19.9 | 18.3 | 17.3 |  | 19.0 |  | -6.1 | 5.7 | -12.9 |  |  |  |  | 2.5 | -6.7 |  |  |  | 5.5 | PT-28 | LI |  |  |  |  |  |  |  |  |  |  |  |  |  |  |  |  |  |  |  |  |
| Fragment-ion (m/z)                                                                                                                                                                                                                                                                                                                                                                                                                                                                                                                                                                                                                                                                                                                                                                                                                                                                                                                                                                                                                                                                                                                                                                                                                                                                                                                                                                                                                                                                                                                                                                                                                                                                                                                                                                                                                                                                                                                                                                                                                                                                                                                                                                                                                                                                                                                                                                                                                                                                                                                                                                                                                                                                                                                                                   | 70.064 | 84.080  | 86.097 | 171.116          | 175.117        | 199.110                                         | 199.179                         | 200.184                    | 227.174                     | 441.249         | 504.268 | 558.322*2   | 603.356           | 655.418*3                                                               | 661.053*3          | 662.376*2 | 685.887 | 702.418 | 753.428 | 771.436 | 835.467*2 | 982.568 | 991.051 | 991.575 | 1115.634 |         |           |         |           |           |           |         |         |         |         |           |         |         |         |          |                        |      |      |      |      |      |      |      |      |      |      |      |      |      |      |       |      |      |      |      |      |      |      |      |      |      |                      |      |      |       |      |      |      |       |      |      |      |      |      |      |       |        |      |      |      |      |      |       |      |       |       |      |       |      |       |      |      |      |      |      |       |      |      |      |      |      |       |      |       |      |      |      |      |      |       |      |       |      |          |    |  |    |    |    |    |    |  |    |      |    |      |    |  |     |    |       |    |       |  |  |  |  |    |  |           |       |  |     |      |      |     |      |  |      |      |       |      |      |  |      |  |      |     |       |  |  |  |  |     |      |  |  |  |     |       |    |  |  |  |  |  |  |  |  |  |  |  |  |  |  |  |  |  |  |  |  |
| Frac. Inten.(% of TIC)                                                                                                                                                                                                                                                                                                                                                                                                                                                                                                                                                                                                                                                                                                                                                                                                                                                                                                                                                                                                                                                                                                                                                                                                                                                                                                                                                                                                                                                                                                                                                                                                                                                                                                                                                                                                                                                                                                                                                                                                                                                                                                                                                                                                                                                                                                                                                                                                                                                                                                                                                                                                                                                                                                                                               | 0.00   | 2.07    | 7.40   | 1.90             | 1.30           | 2.20                                            | 7.69                            | 1.35                       | 2.82                        | 1.43            | 1.77    | 1.66        | 2.82              | 3.49                                                                    | 31.55              | 1.78      | 2.49    | 1.88    | 1.31    | 1.56    | 3.20      | 1.47    | 8.79    | 6.14    | 1.90     |         |           |         |           |           |           |         |         |         |         |           |         |         |         |          |                        |      |      |      |      |      |      |      |      |      |      |      |      |      |      |       |      |      |      |      |      |      |      |      |      |      |                      |      |      |       |      |      |      |       |      |      |      |      |      |      |       |        |      |      |      |      |      |       |      |       |       |      |       |      |       |      |      |      |      |      |       |      |      |      |      |      |       |      |       |      |      |      |      |      |       |      |       |      |          |    |  |    |    |    |    |    |  |    |      |    |      |    |  |     |    |       |    |       |  |  |  |  |    |  |           |       |  |     |      |      |     |      |  |      |      |       |      |      |  |      |  |      |     |       |  |  |  |  |     |      |  |  |  |     |       |    |  |  |  |  |  |  |  |  |  |  |  |  |  |  |  |  |  |  |  |  |
| Rel. Inten.(% of BP)                                                                                                                                                                                                                                                                                                                                                                                                                                                                                                                                                                                                                                                                                                                                                                                                                                                                                                                                                                                                                                                                                                                                                                                                                                                                                                                                                                                                                                                                                                                                                                                                                                                                                                                                                                                                                                                                                                                                                                                                                                                                                                                                                                                                                                                                                                                                                                                                                                                                                                                                                                                                                                                                                                                                                 | 0.01   | 6.57    | 23.47  | 6.03             | 4.11           | 6.98                                            | 24.38                           | 4.29                       | 8.94                        | 4.54            | 5.61    | 5.26        | 8.95              | 11.07                                                                   | 100.00             | 5.65      | 7.89    | 5.96    | 4.17    | 4.95    | 10.14     | 4.67    | 27.86   | 19.47   | 6.02     |         |           |         |           |           |           |         |         |         |         |           |         |         |         |          |                        |      |      |      |      |      |      |      |      |      |      |      |      |      |      |       |      |      |      |      |      |      |      |      |      |      |                      |      |      |       |      |      |      |       |      |      |      |      |      |      |       |        |      |      |      |      |      |       |      |       |       |      |       |      |       |      |      |      |      |      |       |      |      |      |      |      |       |      |       |      |      |      |      |      |       |      |       |      |          |    |  |    |    |    |    |    |  |    |      |    |      |    |  |     |    |       |    |       |  |  |  |  |    |  |           |       |  |     |      |      |     |      |  |      |      |       |      |      |  |      |  |      |     |       |  |  |  |  |     |      |  |  |  |     |       |    |  |  |  |  |  |  |  |  |  |  |  |  |  |  |  |  |  |  |  |  |
| Score                                                                                                                                                                                                                                                                                                                                                                                                                                                                                                                                                                                                                                                                                                                                                                                                                                                                                                                                                                                                                                                                                                                                                                                                                                                                                                                                                                                                                                                                                                                                                                                                                                                                                                                                                                                                                                                                                                                                                                                                                                                                                                                                                                                                                                                                                                                                                                                                                                                                                                                                                                                                                                                                                                                                                                | 0.20   | -0.07   | 0.50   | 0.75             | 1.50           | 0.75                                            | 0.50                            | -0.04                      | 0.50                        | 0.75            | 1.50    | 1.50        | 1.50              | -0.11                                                                   | 1.50               | -0.06     | 1.50    | 1.50    | 0.50    | 0.50    | 1.50      | -0.05   | 1.50    | -0.19   | 1.50     |         |           |         |           |           |           |         |         |         |         |           |         |         |         |          |                        |      |      |      |      |      |      |      |      |      |      |      |      |      |      |       |      |      |      |      |      |      |      |      |      |      |                      |      |      |       |      |      |      |       |      |      |      |      |      |      |       |        |      |      |      |      |      |       |      |       |       |      |       |      |       |      |      |      |      |      |       |      |      |      |      |      |       |      |       |      |      |      |      |      |       |      |       |      |          |    |  |    |    |    |    |    |  |    |      |    |      |    |  |     |    |       |    |       |  |  |  |  |    |  |           |       |  |     |      |      |     |      |  |      |      |       |      |      |  |      |  |      |     |       |  |  |  |  |     |      |  |  |  |     |       |    |  |  |  |  |  |  |  |  |  |  |  |  |  |  |  |  |  |  |  |  |
| Ion-type                                                                                                                                                                                                                                                                                                                                                                                                                                                                                                                                                                                                                                                                                                                                                                                                                                                                                                                                                                                                                                                                                                                                                                                                                                                                                                                                                                                                                                                                                                                                                                                                                                                                                                                                                                                                                                                                                                                                                                                                                                                                                                                                                                                                                                                                                                                                                                                                                                                                                                                                                                                                                                                                                                                                                             | PR     |         | a1     | LG               | y1             | PT                                              | a2                              |                            | b2                          | PTLE            | y3      | y3+2        | y3                |                                                                         | y18                | +3        | y**12   | y3      | b**14   |         |           |         |         | y9      |          |         |           |         |           |           |           |         |         |         |         |           |         |         |         |          |                        |      |      |      |      |      |      |      |      |      |      |      |      |      |      |       |      |      |      |      |      |      |      |      |      |      |                      |      |      |       |      |      |      |       |      |      |      |      |      |      |       |        |      |      |      |      |      |       |      |       |       |      |       |      |       |      |      |      |      |      |       |      |      |      |      |      |       |      |       |      |      |      |      |      |       |      |       |      |          |    |  |    |    |    |    |    |  |    |      |    |      |    |  |     |    |       |    |       |  |  |  |  |    |  |           |       |  |     |      |      |     |      |  |      |      |       |      |      |  |      |  |      |     |       |  |  |  |  |     |      |  |  |  |     |       |    |  |  |  |  |  |  |  |  |  |  |  |  |  |  |  |  |  |  |  |  |
| Delta ppm                                                                                                                                                                                                                                                                                                                                                                                                                                                                                                                                                                                                                                                                                                                                                                                                                                                                                                                                                                                                                                                                                                                                                                                                                                                                                                                                                                                                                                                                                                                                                                                                                                                                                                                                                                                                                                                                                                                                                                                                                                                                                                                                                                                                                                                                                                                                                                                                                                                                                                                                                                                                                                                                                                                                                            | -13.2  |         | 5.5    | 19.8             | -9.4           | 8.9                                             | -5.0                            |                            | -4.0                        | 33.1            | -19.9   | 18.3        | 17.3              |                                                                         | 19.0               |           | -6.1    | 5.7     | -12.9   |         |           |         |         | 2.5     | -6.7     |         |           |         |           |           |           |         |         |         |         |           |         |         |         |          |                        |      |      |      |      |      |      |      |      |      |      |      |      |      |      |       |      |      |      |      |      |      |      |      |      |      |                      |      |      |       |      |      |      |       |      |      |      |      |      |      |       |        |      |      |      |      |      |       |      |       |       |      |       |      |       |      |      |      |      |      |       |      |      |      |      |      |       |      |       |      |      |      |      |      |       |      |       |      |          |    |  |    |    |    |    |    |  |    |      |    |      |    |  |     |    |       |    |       |  |  |  |  |    |  |           |       |  |     |      |      |     |      |  |      |      |       |      |      |  |      |  |      |     |       |  |  |  |  |     |      |  |  |  |     |       |    |  |  |  |  |  |  |  |  |  |  |  |  |  |  |  |  |  |  |  |  |
|                                                                                                                                                                                                                                                                                                                                                                                                                                                                                                                                                                                                                                                                                                                                                                                                                                                                                                                                                                                                                                                                                                                                                                                                                                                                                                                                                                                                                                                                                                                                                                                                                                                                                                                                                                                                                                                                                                                                                                                                                                                                                                                                                                                                                                                                                                                                                                                                                                                                                                                                                                                                                                                                                                                                                                      |        |         | 5.5    | PT-28            | LI             |                                                 |                                 |                            |                             |                 |         |             |                   |                                                                         |                    |           |         |         |         |         |           |         |         |         |          |         |           |         |           |           |           |         |         |         |         |           |         |         |         |          |                        |      |      |      |      |      |      |      |      |      |      |      |      |      |      |       |      |      |      |      |      |      |      |      |      |      |                      |      |      |       |      |      |      |       |      |      |      |      |      |      |       |        |      |      |      |      |      |       |      |       |       |      |       |      |       |      |      |      |      |      |       |      |      |      |      |      |       |      |       |      |      |      |      |      |       |      |       |      |          |    |  |    |    |    |    |    |  |    |      |    |      |    |  |     |    |       |    |       |  |  |  |  |    |  |           |       |  |     |      |      |     |      |  |      |      |       |      |      |  |      |  |      |     |       |  |  |  |  |     |      |  |  |  |     |       |    |  |  |  |  |  |  |  |  |  |  |  |  |  |  |  |  |  |  |  |  |

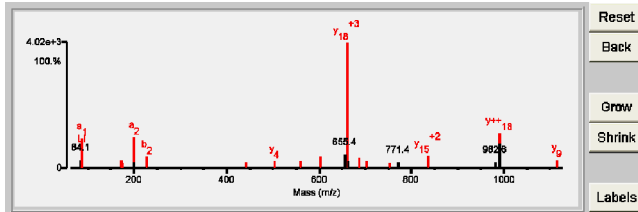

Result Summary

| Rank | Score | SPI (%) | BCS | # Unmatched Ions | Variable sites | Sequence                           | MH <sup>+</sup> Calculated (Da) | MH <sup>+</sup> Error (Da) | MH <sup>+</sup> Error (ppm) | Protein MW/pl (Da) | Species | Accession # | Protein Name                                                            |
|------|-------|---------|-----|------------------|----------------|------------------------------------|---------------------------------|----------------------------|-----------------------------|--------------------|---------|-------------|-------------------------------------------------------------------------|
| 1    | 11.12 | 61.7    | 8   | 12/25            | K328k          | (R)kILGQEGDASYLASEISTWDGVVTPSEK(A) | 3093.5627                       | 114.0640                   | 6.6                         | 43062.4/5.19       | HUMAN   | Q12905      | Interleukin enhancer-binding factor 2 OS=Homo sapiens GN=ILF2 PE=1 SV=2 |

Detailed Results

| Rank                    | Score  | SPI (%)             | BCS     | # Unmatched Ions | Variable sites | Sequence                                                                 | MH <sup>+</sup> Calculated (Da) | MH <sup>+</sup> Error (Da) | MH <sup>+</sup> Error (ppm) | Protein MW/pl (Da) | Species | Accession # | MS-Digest Index # | Protein Name                                                            |         |         |                                    |         |                       |          |          |          |          |          |          |
|-------------------------|--------|---------------------|---------|------------------|----------------|--------------------------------------------------------------------------|---------------------------------|----------------------------|-----------------------------|--------------------|---------|-------------|-------------------|-------------------------------------------------------------------------|---------|---------|------------------------------------|---------|-----------------------|----------|----------|----------|----------|----------|----------|
| 1                       | 11.12  | 61.7                | 8       | 12/25            | K328k          | (R)k I I G Q E G D A S Y L A S E I S T W D G V I / V / T / P / S E K (A) | 3093.5627                       | 114.0640                   | 6.6                         | 43062.4/5.19       | HUMAN   | Q12905      | 315817            | Interleukin enhancer-binding factor 2 OS=Homo sapiens GN=ILF2 PE=1 SV=2 |         |         |                                    |         |                       |          |          |          |          |          |          |
| Fragment-ion (m/z)      | 86.094 | 258.140             | 363.173 | 385.189          | 441.141        | 460.230                                                                  | 469.329                         | 478.749                    | 543.264                     | 549.336            | 561.285 | 585.311     | 660.342           | 717.864                                                                 | 765.368 | 773.426 | 829.921 <sup>+2</sup>              | 839.421 | 971.449 <sup>+2</sup> | 1044.544 | 1089.550 | 1142.150 | 1257.097 | 1399.712 | 1418.706 |
| Frac. Inten. (% of TIC) | 0.13   | 5.43                | 3.02    | 2.58             | 2.87           | 18.21                                                                    | 4.06                            | 3.14                       | 4.20                        | 3.90               | 6.78    | 2.41        | 3.23              | 2.42                                                                    | 2.69    | 4.58    | 2.48                               | 4.82    | 4.04                  | 4.09     | 3.08     | 2.40     | 3.86     | 2.45     | 3.13     |
| Rel. Inten. (% of BP)   | 0.72   | 29.81               | 16.56   | 14.15            | 15.74          | 100.00                                                                   | 22.27                           | 17.24                      | 23.05                       | 21.43              | 37.21   | 13.25       | 17.76             | 13.29                                                                   | 14.79   | 25.13   | 13.62                              | 26.45   | 22.17                 | 22.48    | 16.93    | 13.21    | 21.20    | 13.45    | 17.20    |
| Score                   | 0.22   | 0.50                | 1.50    | -0.14            | -0.16          | 1.50                                                                     | 0.50                            | -0.17                      | 0.50                        | -0.21              | 1.50    | 0.75        | 1.50              | 0.50                                                                    | -0.15   | 1.50    | 0.25                               | -0.26   | -0.22                 | 1.50     | -0.17    | -0.13    | -0.21    | -0.13    | 1.50     |
| Ion-type                | LI     | y2-H <sub>2</sub> O | y3      |                  |                | y4                                                                       | b3                              |                            | y5-H <sub>2</sub> O         |                    | y5      | DGVIVT      | y6                |                                                                         |         | y7      | b15-H <sub>2</sub> O <sup>+2</sup> |         |                       | y10      |          |          |          |          | y13      |
| Delta ppm               | -22.4  | -19.9               | -40.0   |                  |                | -22.6                                                                    | 30.5                            |                            | -24.7                       |                    | -4.9    | -24.3       | -22.2             |                                                                         |         | -18.2   | 18.8                               |         |                       | -12.6    |          |          |          |          | -7.3     |

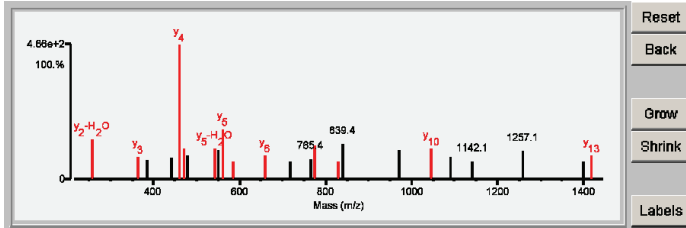

Result Summary

| Rank | Score | SPI (%) | BCS | # Unmatched Ions | Variable sites | Sequence             | MH <sup>+</sup> Calculated (Da) | MH <sup>+</sup> Error (Da) | MH <sup>+</sup> Error (ppm) | Protein MW/pi (Da) | Species | Accession # | Protein Name                                                          |
|------|-------|---------|-----|------------------|----------------|----------------------|---------------------------------|----------------------------|-----------------------------|--------------------|---------|-------------|-----------------------------------------------------------------------|
| 1    | 12.03 | 60.6    | 5   | 11/25            | K804k          | (R)IADLQKTSYHLVLR(A) | 1713.9646                       | 114.0679                   | 13.7                        | 123743.8/5.50      | HUMAN   | P42702      | Leukemia inhibitory factor receptor OS=Homo sapiens GN=LIFR PE=1 SV=1 |

Detailed Results

| Rank                                                                                                                                                                                                                                                                                                                                                                                                                                                                                                                                                                                                                                                                                                                                                                                                                                                                                                                                                                                                                                                                                                                                                                                                                                                                                                                                                                                                                                                                                                                                                                                                                                                                                                                                                                                                                                                                                                                                                                                                                                                                                                                                                                                                                                                                                                                                                                                                                                      | Score  | SPI (%) | BCS            | # Unmatched Ions | Variable sites | Sequence             | MH <sup>+</sup> Calculated (Da) | MH <sup>+</sup> Error (Da) | MH <sup>+</sup> Error (ppm) | Protein MW/pi (Da) | Species | Accession # | MS-Digest Index # | Protein Name                                                          |                    |         |         |                |                              |         |                |                       |                |                       |         |         |         |         |         |         |         |         |         |                       |         |         |                       |         |                       |         |                         |      |      |       |      |      |      |      |      |      |      |      |      |      |      |      |      |      |      |      |      |      |      |      |      |      |                       |       |      |        |      |       |      |       |      |       |       |       |       |       |       |       |       |       |       |       |       |       |       |       |       |       |       |       |      |      |      |       |      |       |      |       |       |      |       |      |       |      |       |       |      |      |      |      |       |      |       |      |          |  |    |                |    |   |   |  |                |  |  |  |  |       |  |    |  |  |                |                              |     |                |  |                |                |  |           |  |      |       |       |      |      |  |      |  |  |  |  |      |  |      |  |  |     |     |      |      |  |     |  |      |
|-------------------------------------------------------------------------------------------------------------------------------------------------------------------------------------------------------------------------------------------------------------------------------------------------------------------------------------------------------------------------------------------------------------------------------------------------------------------------------------------------------------------------------------------------------------------------------------------------------------------------------------------------------------------------------------------------------------------------------------------------------------------------------------------------------------------------------------------------------------------------------------------------------------------------------------------------------------------------------------------------------------------------------------------------------------------------------------------------------------------------------------------------------------------------------------------------------------------------------------------------------------------------------------------------------------------------------------------------------------------------------------------------------------------------------------------------------------------------------------------------------------------------------------------------------------------------------------------------------------------------------------------------------------------------------------------------------------------------------------------------------------------------------------------------------------------------------------------------------------------------------------------------------------------------------------------------------------------------------------------------------------------------------------------------------------------------------------------------------------------------------------------------------------------------------------------------------------------------------------------------------------------------------------------------------------------------------------------------------------------------------------------------------------------------------------------|--------|---------|----------------|------------------|----------------|----------------------|---------------------------------|----------------------------|-----------------------------|--------------------|---------|-------------|-------------------|-----------------------------------------------------------------------|--------------------|---------|---------|----------------|------------------------------|---------|----------------|-----------------------|----------------|-----------------------|---------|---------|---------|---------|---------|---------|---------|---------|---------|-----------------------|---------|---------|-----------------------|---------|-----------------------|---------|-------------------------|------|------|-------|------|------|------|------|------|------|------|------|------|------|------|------|------|------|------|------|------|------|------|------|------|------|-----------------------|-------|------|--------|------|-------|------|-------|------|-------|-------|-------|-------|-------|-------|-------|-------|-------|-------|-------|-------|-------|-------|-------|-------|-------|-------|-------|------|------|------|-------|------|-------|------|-------|-------|------|-------|------|-------|------|-------|-------|------|------|------|------|-------|------|-------|------|----------|--|----|----------------|----|---|---|--|----------------|--|--|--|--|-------|--|----|--|--|----------------|------------------------------|-----|----------------|--|----------------|----------------|--|-----------|--|------|-------|-------|------|------|--|------|--|--|--|--|------|--|------|--|--|-----|-----|------|------|--|-----|--|------|
| 1                                                                                                                                                                                                                                                                                                                                                                                                                                                                                                                                                                                                                                                                                                                                                                                                                                                                                                                                                                                                                                                                                                                                                                                                                                                                                                                                                                                                                                                                                                                                                                                                                                                                                                                                                                                                                                                                                                                                                                                                                                                                                                                                                                                                                                                                                                                                                                                                                                         | 12.03  | 60.6    | 5              | 11/25            | K804k          | (R)IADLQKTSYHLVLR(A) | 1713.9646                       | 114.0679                   | 13.7                        | 123743.8/5.50      | HUMAN   | P42702      | 360053            | Leukemia inhibitory factor receptor OS=Homo sapiens GN=LIFR PE=1 SV=1 |                    |         |         |                |                              |         |                |                       |                |                       |         |         |         |         |         |         |         |         |         |                       |         |         |                       |         |                       |         |                         |      |      |       |      |      |      |      |      |      |      |      |      |      |      |      |      |      |      |      |      |      |      |      |      |      |                       |       |      |        |      |       |      |       |      |       |       |       |       |       |       |       |       |       |       |       |       |       |       |       |       |       |       |       |      |      |      |       |      |       |      |       |       |      |       |      |       |      |       |       |      |      |      |      |       |      |       |      |          |  |    |                |    |   |   |  |                |  |  |  |  |       |  |    |  |  |                |                              |     |                |  |                |                |  |           |  |      |       |       |      |      |  |      |  |  |  |  |      |  |      |  |  |     |     |      |      |  |     |  |      |
| <table border="1"> <thead> <tr> <th>Fragment-ion (m/z)</th> <th>84.044</th><th>84.080</th><th>86.096</th><th>87.054</th><th>91.053</th><th>110.071</th><th>119.048</th><th>136.075</th><th>137.078</th><th>141.101</th><th>175.119</th><th>200.139</th><th>223.155</th><th>233.092</th><th>251.150</th><th>261.087</th><th>278.114</th><th>288.204</th><th>319.212<sup>+2</sup></th><th>350.218</th><th>387.271</th><th>469.795<sup>+2</sup></th><th>500.358</th><th>625.310<sup>+2</sup></th><th>637.414</th> </tr> </thead> <tbody> <tr> <td>Frac. Inten. (% of TIC)</td> <td>3.48</td><td>0.50</td><td>17.10</td><td>0.08</td><td>4.90</td><td>0.49</td><td>3.80</td><td>0.96</td><td>1.95</td><td>4.38</td><td>5.87</td><td>3.46</td><td>2.10</td><td>4.51</td><td>2.74</td><td>1.94</td><td>5.79</td><td>2.51</td><td>6.10</td><td>2.70</td><td>4.68</td><td>3.02</td><td>8.76</td><td>2.19</td><td>5.99</td> </tr> <tr> <td>Rel. Inten. (% of BP)</td> <td>20.32</td><td>2.94</td><td>100.00</td><td>0.46</td><td>28.65</td><td>2.89</td><td>22.23</td><td>5.64</td><td>11.42</td><td>25.61</td><td>34.34</td><td>20.22</td><td>12.28</td><td>26.40</td><td>16.01</td><td>11.35</td><td>33.86</td><td>14.65</td><td>35.65</td><td>15.78</td><td>27.37</td><td>17.64</td><td>51.20</td><td>12.82</td><td>35.02</td> </tr> <tr> <td>Score</td> <td>-0.20</td><td>0.50</td><td>0.50</td><td>0.33</td><td>-0.29</td><td>1.00</td><td>-0.22</td><td>1.00</td><td>-0.11</td><td>-0.26</td><td>1.50</td><td>-0.20</td><td>0.50</td><td>-0.26</td><td>0.75</td><td>-0.11</td><td>-0.34</td><td>1.50</td><td>1.50</td><td>0.75</td><td>1.50</td><td>-0.18</td><td>1.50</td><td>-0.13</td><td>1.50</td> </tr> <tr> <td>Ion-type</td> <td></td><td>KQ</td><td>a<sub>1</sub></td><td>NR</td><td>H</td><td>Y</td><td></td><td>Y<sub>1</sub></td><td></td><td></td><td></td><td></td><td>HL-28</td><td></td><td>HL</td><td></td><td></td><td>Y<sub>2</sub></td><td>Y<sub>5</sub><sup>+2</sup></td><td>HLV</td><td>Y<sub>3</sub></td><td></td><td>Y<sub>4</sub></td><td>Y<sub>5</sub></td><td></td> </tr> <tr> <td>Delta ppm</td> <td></td><td>-4.5</td><td>-22.3</td><td>-11.4</td><td>-6.1</td><td>-4.3</td><td></td><td>-0.9</td><td></td><td></td><td></td><td></td><td>-7.8</td><td></td><td>-4.2</td><td></td><td></td><td>2.7</td><td>2.7</td><td>-4.8</td><td>-0.6</td><td></td><td>4.4</td><td></td><td>-0.8</td> </tr> </tbody> </table> |        |         |                |                  |                |                      |                                 |                            |                             |                    |         |             |                   |                                                                       | Fragment-ion (m/z) | 84.044  | 84.080  | 86.096         | 87.054                       | 91.053  | 110.071        | 119.048               | 136.075        | 137.078               | 141.101 | 175.119 | 200.139 | 223.155 | 233.092 | 251.150 | 261.087 | 278.114 | 288.204 | 319.212 <sup>+2</sup> | 350.218 | 387.271 | 469.795 <sup>+2</sup> | 500.358 | 625.310 <sup>+2</sup> | 637.414 | Frac. Inten. (% of TIC) | 3.48 | 0.50 | 17.10 | 0.08 | 4.90 | 0.49 | 3.80 | 0.96 | 1.95 | 4.38 | 5.87 | 3.46 | 2.10 | 4.51 | 2.74 | 1.94 | 5.79 | 2.51 | 6.10 | 2.70 | 4.68 | 3.02 | 8.76 | 2.19 | 5.99 | Rel. Inten. (% of BP) | 20.32 | 2.94 | 100.00 | 0.46 | 28.65 | 2.89 | 22.23 | 5.64 | 11.42 | 25.61 | 34.34 | 20.22 | 12.28 | 26.40 | 16.01 | 11.35 | 33.86 | 14.65 | 35.65 | 15.78 | 27.37 | 17.64 | 51.20 | 12.82 | 35.02 | Score | -0.20 | 0.50 | 0.50 | 0.33 | -0.29 | 1.00 | -0.22 | 1.00 | -0.11 | -0.26 | 1.50 | -0.20 | 0.50 | -0.26 | 0.75 | -0.11 | -0.34 | 1.50 | 1.50 | 0.75 | 1.50 | -0.18 | 1.50 | -0.13 | 1.50 | Ion-type |  | KQ | a <sub>1</sub> | NR | H | Y |  | Y <sub>1</sub> |  |  |  |  | HL-28 |  | HL |  |  | Y <sub>2</sub> | Y <sub>5</sub> <sup>+2</sup> | HLV | Y <sub>3</sub> |  | Y <sub>4</sub> | Y <sub>5</sub> |  | Delta ppm |  | -4.5 | -22.3 | -11.4 | -6.1 | -4.3 |  | -0.9 |  |  |  |  | -7.8 |  | -4.2 |  |  | 2.7 | 2.7 | -4.8 | -0.6 |  | 4.4 |  | -0.8 |
| Fragment-ion (m/z)                                                                                                                                                                                                                                                                                                                                                                                                                                                                                                                                                                                                                                                                                                                                                                                                                                                                                                                                                                                                                                                                                                                                                                                                                                                                                                                                                                                                                                                                                                                                                                                                                                                                                                                                                                                                                                                                                                                                                                                                                                                                                                                                                                                                                                                                                                                                                                                                                        | 84.044 | 84.080  | 86.096         | 87.054           | 91.053         | 110.071              | 119.048                         | 136.075                    | 137.078                     | 141.101            | 175.119 | 200.139     | 223.155           | 233.092                                                               | 251.150            | 261.087 | 278.114 | 288.204        | 319.212 <sup>+2</sup>        | 350.218 | 387.271        | 469.795 <sup>+2</sup> | 500.358        | 625.310 <sup>+2</sup> | 637.414 |         |         |         |         |         |         |         |         |                       |         |         |                       |         |                       |         |                         |      |      |       |      |      |      |      |      |      |      |      |      |      |      |      |      |      |      |      |      |      |      |      |      |      |                       |       |      |        |      |       |      |       |      |       |       |       |       |       |       |       |       |       |       |       |       |       |       |       |       |       |       |       |      |      |      |       |      |       |      |       |       |      |       |      |       |      |       |       |      |      |      |      |       |      |       |      |          |  |    |                |    |   |   |  |                |  |  |  |  |       |  |    |  |  |                |                              |     |                |  |                |                |  |           |  |      |       |       |      |      |  |      |  |  |  |  |      |  |      |  |  |     |     |      |      |  |     |  |      |
| Frac. Inten. (% of TIC)                                                                                                                                                                                                                                                                                                                                                                                                                                                                                                                                                                                                                                                                                                                                                                                                                                                                                                                                                                                                                                                                                                                                                                                                                                                                                                                                                                                                                                                                                                                                                                                                                                                                                                                                                                                                                                                                                                                                                                                                                                                                                                                                                                                                                                                                                                                                                                                                                   | 3.48   | 0.50    | 17.10          | 0.08             | 4.90           | 0.49                 | 3.80                            | 0.96                       | 1.95                        | 4.38               | 5.87    | 3.46        | 2.10              | 4.51                                                                  | 2.74               | 1.94    | 5.79    | 2.51           | 6.10                         | 2.70    | 4.68           | 3.02                  | 8.76           | 2.19                  | 5.99    |         |         |         |         |         |         |         |         |                       |         |         |                       |         |                       |         |                         |      |      |       |      |      |      |      |      |      |      |      |      |      |      |      |      |      |      |      |      |      |      |      |      |      |                       |       |      |        |      |       |      |       |      |       |       |       |       |       |       |       |       |       |       |       |       |       |       |       |       |       |       |       |      |      |      |       |      |       |      |       |       |      |       |      |       |      |       |       |      |      |      |      |       |      |       |      |          |  |    |                |    |   |   |  |                |  |  |  |  |       |  |    |  |  |                |                              |     |                |  |                |                |  |           |  |      |       |       |      |      |  |      |  |  |  |  |      |  |      |  |  |     |     |      |      |  |     |  |      |
| Rel. Inten. (% of BP)                                                                                                                                                                                                                                                                                                                                                                                                                                                                                                                                                                                                                                                                                                                                                                                                                                                                                                                                                                                                                                                                                                                                                                                                                                                                                                                                                                                                                                                                                                                                                                                                                                                                                                                                                                                                                                                                                                                                                                                                                                                                                                                                                                                                                                                                                                                                                                                                                     | 20.32  | 2.94    | 100.00         | 0.46             | 28.65          | 2.89                 | 22.23                           | 5.64                       | 11.42                       | 25.61              | 34.34   | 20.22       | 12.28             | 26.40                                                                 | 16.01              | 11.35   | 33.86   | 14.65          | 35.65                        | 15.78   | 27.37          | 17.64                 | 51.20          | 12.82                 | 35.02   |         |         |         |         |         |         |         |         |                       |         |         |                       |         |                       |         |                         |      |      |       |      |      |      |      |      |      |      |      |      |      |      |      |      |      |      |      |      |      |      |      |      |      |                       |       |      |        |      |       |      |       |      |       |       |       |       |       |       |       |       |       |       |       |       |       |       |       |       |       |       |       |      |      |      |       |      |       |      |       |       |      |       |      |       |      |       |       |      |      |      |      |       |      |       |      |          |  |    |                |    |   |   |  |                |  |  |  |  |       |  |    |  |  |                |                              |     |                |  |                |                |  |           |  |      |       |       |      |      |  |      |  |  |  |  |      |  |      |  |  |     |     |      |      |  |     |  |      |
| Score                                                                                                                                                                                                                                                                                                                                                                                                                                                                                                                                                                                                                                                                                                                                                                                                                                                                                                                                                                                                                                                                                                                                                                                                                                                                                                                                                                                                                                                                                                                                                                                                                                                                                                                                                                                                                                                                                                                                                                                                                                                                                                                                                                                                                                                                                                                                                                                                                                     | -0.20  | 0.50    | 0.50           | 0.33             | -0.29          | 1.00                 | -0.22                           | 1.00                       | -0.11                       | -0.26              | 1.50    | -0.20       | 0.50              | -0.26                                                                 | 0.75               | -0.11   | -0.34   | 1.50           | 1.50                         | 0.75    | 1.50           | -0.18                 | 1.50           | -0.13                 | 1.50    |         |         |         |         |         |         |         |         |                       |         |         |                       |         |                       |         |                         |      |      |       |      |      |      |      |      |      |      |      |      |      |      |      |      |      |      |      |      |      |      |      |      |      |                       |       |      |        |      |       |      |       |      |       |       |       |       |       |       |       |       |       |       |       |       |       |       |       |       |       |       |       |      |      |      |       |      |       |      |       |       |      |       |      |       |      |       |       |      |      |      |      |       |      |       |      |          |  |    |                |    |   |   |  |                |  |  |  |  |       |  |    |  |  |                |                              |     |                |  |                |                |  |           |  |      |       |       |      |      |  |      |  |  |  |  |      |  |      |  |  |     |     |      |      |  |     |  |      |
| Ion-type                                                                                                                                                                                                                                                                                                                                                                                                                                                                                                                                                                                                                                                                                                                                                                                                                                                                                                                                                                                                                                                                                                                                                                                                                                                                                                                                                                                                                                                                                                                                                                                                                                                                                                                                                                                                                                                                                                                                                                                                                                                                                                                                                                                                                                                                                                                                                                                                                                  |        | KQ      | a <sub>1</sub> | NR               | H              | Y                    |                                 | Y <sub>1</sub>             |                             |                    |         |             | HL-28             |                                                                       | HL                 |         |         | Y <sub>2</sub> | Y <sub>5</sub> <sup>+2</sup> | HLV     | Y <sub>3</sub> |                       | Y <sub>4</sub> | Y <sub>5</sub>        |         |         |         |         |         |         |         |         |         |                       |         |         |                       |         |                       |         |                         |      |      |       |      |      |      |      |      |      |      |      |      |      |      |      |      |      |      |      |      |      |      |      |      |      |                       |       |      |        |      |       |      |       |      |       |       |       |       |       |       |       |       |       |       |       |       |       |       |       |       |       |       |       |      |      |      |       |      |       |      |       |       |      |       |      |       |      |       |       |      |      |      |      |       |      |       |      |          |  |    |                |    |   |   |  |                |  |  |  |  |       |  |    |  |  |                |                              |     |                |  |                |                |  |           |  |      |       |       |      |      |  |      |  |  |  |  |      |  |      |  |  |     |     |      |      |  |     |  |      |
| Delta ppm                                                                                                                                                                                                                                                                                                                                                                                                                                                                                                                                                                                                                                                                                                                                                                                                                                                                                                                                                                                                                                                                                                                                                                                                                                                                                                                                                                                                                                                                                                                                                                                                                                                                                                                                                                                                                                                                                                                                                                                                                                                                                                                                                                                                                                                                                                                                                                                                                                 |        | -4.5    | -22.3          | -11.4            | -6.1           | -4.3                 |                                 | -0.9                       |                             |                    |         |             | -7.8              |                                                                       | -4.2               |         |         | 2.7            | 2.7                          | -4.8    | -0.6           |                       | 4.4            |                       | -0.8    |         |         |         |         |         |         |         |         |                       |         |         |                       |         |                       |         |                         |      |      |       |      |      |      |      |      |      |      |      |      |      |      |      |      |      |      |      |      |      |      |      |      |      |                       |       |      |        |      |       |      |       |      |       |       |       |       |       |       |       |       |       |       |       |       |       |       |       |       |       |       |       |      |      |      |       |      |       |      |       |       |      |       |      |       |      |       |       |      |      |      |      |       |      |       |      |          |  |    |                |    |   |   |  |                |  |  |  |  |       |  |    |  |  |                |                              |     |                |  |                |                |  |           |  |      |       |       |      |      |  |      |  |  |  |  |      |  |      |  |  |     |     |      |      |  |     |  |      |

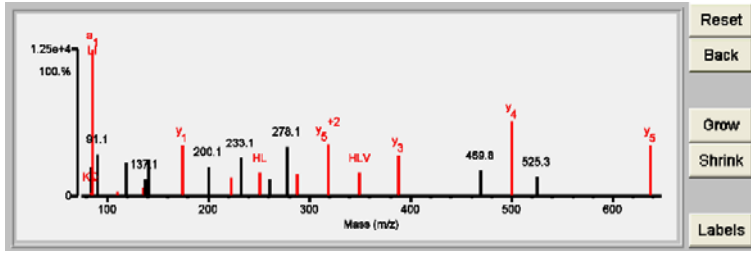

Result Summary

| Rank | Score | SPI (%) | BCS | # Unmatched Ions | Variable sites | Sequence                                                                                                                       | MH <sup>+</sup> Calculated (Da) | MH <sup>+</sup> Error (Da) | MH <sup>+</sup> Error (ppm) | Protein MW/pl (Da) | Species | Accession # | Protein Name                                                      |
|------|-------|---------|-----|------------------|----------------|--------------------------------------------------------------------------------------------------------------------------------|---------------------------------|----------------------------|-----------------------------|--------------------|---------|-------------|-------------------------------------------------------------------|
| 1    | 15.38 | 83.8    | 8   | 5/25             | K118k          | (R)N <sup>V</sup> N <sup>I</sup> V <sup>F</sup> k <sup>/F</sup> I <sup>/I</sup> P <sup>N</sup> V <sup>V</sup> K <sup>(Y)</sup> | 1644.9836                       | 114.0589                   | 9.1                         | 36688.9/8.44       | HUMAN   | P00338      | L-lactate dehydrogenase A chain OS=Homo sapiens GN=LDHA PE=1 SV=2 |

Detailed Results

| Rank | Score | SPI (%) | BCS | # Unmatched Ions | Variable sites | Sequence                                                                                                                       | MH <sup>+</sup> Calculated (Da) | MH <sup>+</sup> Error (Da) | MH <sup>+</sup> Error (ppm) | Protein MW/pl (Da) | Species | Accession # | MS-Digest Index # | Protein Name                                                      |
|------|-------|---------|-----|------------------|----------------|--------------------------------------------------------------------------------------------------------------------------------|---------------------------------|----------------------------|-----------------------------|--------------------|---------|-------------|-------------------|-------------------------------------------------------------------|
| 1    | 15.38 | 83.8    | 8   | 5/25             | K118k          | (R)N <sup>V</sup> N <sup>I</sup> V <sup>F</sup> k <sup>/F</sup> I <sup>/I</sup> P <sup>N</sup> V <sup>V</sup> K <sup>(Y)</sup> | 1644.9836                       | 114.0589                   | 9.1                         | 36688.9/8.44       | HUMAN   | P00338      | 351281            | L-lactate dehydrogenase A chain OS=Homo sapiens GN=LDHA PE=1 SV=2 |

  

| Fragment-ion (m/z)      | 70.064 | 72.081 | 84.080 | 86.096 | 87.053 | 88.038 | 120.081 | 141.101 | 147.112 | 186.123 | 187.121 | 200.138 | 212.103 | 214.120 | 311.169 | 328.159 | 382.255 | 390.219 | 441.249 | 503.292 | 537.321 | 556.344 | 669.425 | 782.517 | 929.601 |
|-------------------------|--------|--------|--------|--------|--------|--------|---------|---------|---------|---------|---------|---------|---------|---------|---------|---------|---------|---------|---------|---------|---------|---------|---------|---------|---------|
| Frac. Inten. (% of TIC) | 0.00   | 0.20   | 0.32   | 0.38   | 2.99   | 3.98   | 0.14    | 3.59    | 2.89    | 15.51   | 2.77    | 3.04    | 5.45    | 6.34    | 6.75    | 3.22    | 2.83    | 2.72    | 3.93    | 2.58    | 2.98    | 14.61   | 6.12    | 3.29    | 3.35    |
| Rel. Inten. (% of BP)   | 0.02   | 1.28   | 2.04   | 2.43   | 19.29  | 25.66  | 0.90    | 23.18   | 18.65   | 100.00  | 17.89   | 19.62   | 35.14   | 40.89   | 43.51   | 20.77   | 18.24   | 17.54   | 25.35   | 16.66   | 19.23   | 94.23   | 39.46   | 21.22   | 21.63   |
| Score                   | 0.20   | 0.50   | 0.50   | 0.22   | 0.50   | -0.26  | 1.00    | -0.23   | 1.50    | 0.50    | -0.18   | -0.20   | 0.75    | 0.75    | 0.75    | 0.50    | -0.18   | 0.75    | 0.50    | 0.75    | 0.75    | 1.50    | 1.50    | 1.50    | 1.50    |
| Ion-type                | PR     | V      | KQ     | LI     | a1     | F      | F       | y1      | a2      | PN      | b2      | PNV     | b3      | PNV     | b3      | KF      | b4      | kFI     | IIPNV   | y5      | y6      | y6      | y7      | y8      | y8      |
| Delta ppm               | -16.1  | -3.8   | -14.0  | -3.8   | -42.3  | 0.50   | 1.0     | -4.8    | -12.4   | NV-28   | -12.4   |         | -4.1    | 1.8     | -9.9    | -10.5   |         | 12.1    | 5.2     | -14.0   | -37.4   | -3.1    | -6.3    | 4.3     | 20.0    |

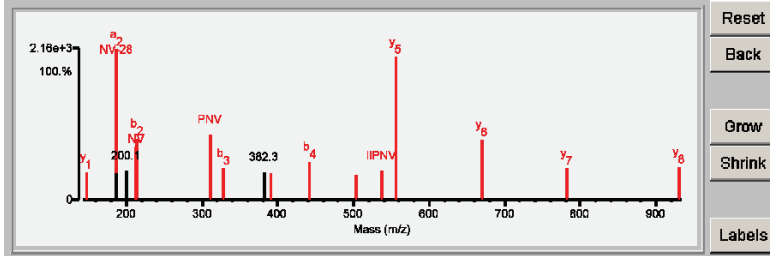

Result Summary

| Rank | Score | SPI (%) | BCS | # Unmatched Ions | Variable sites | Sequence                | MH <sup>+</sup> Calculated (Da) | MH <sup>+</sup> Error (Da) | MH <sup>+</sup> Error (ppm) | Protein MW/Pl (Da) | Species | Accession # | Protein Name                                                               |
|------|-------|---------|-----|------------------|----------------|-------------------------|---------------------------------|----------------------------|-----------------------------|--------------------|---------|-------------|----------------------------------------------------------------------------|
| 1    | 13.39 | 74.7    | 7   | 7/25             | K14k           | (K)DQLIYNLLKEEQTPQNK(I) | 2074.0815                       | 114.0590                   | 7.4                         | 36688.9/8.44       | HUMAN   | P00338      | L-lactate dehydrogenase A chain OS=Homo sapiens GN=LDHA PE=1 SV=2          |
| 2    | 6.95  | 56.7    | 4   | 11/25            | K22k           | (K)DQLIYNLLKEEQTPQNK(I) | 2074.0815                       | 114.0590                   | 7.4                         | 36688.9/8.44       | HUMAN   | P00338      | L-lactate dehydrogenase A chain OS=Homo sapiens GN=LDHA PE=1 SV=2          |
| 3    | 4.91  | 53.2    | 3   | 14/25            | K462k K466k    | (K)RSIGSKELDQSQKVEKk(T) | 1960.0822                       | 228.0584                   | -12.6                       | 56564.2/7.32       | HUMAN   | RQ6Y288     | REVERSE Beta-1,3-glucosyltransferase OS=Homo sapiens GN=B3GALT.L PE=1 SV=2 |
| 3    | 4.91  | 53.2    | 4   | 14/25            | K462k K466k    | (K)RSIGSKELDQSQKVEKk(T) | 1960.0822                       | 228.0584                   | -12.6                       | 56564.2/7.32       | HUMAN   | RQ6Y288     | REVERSE Beta-1,3-glucosyltransferase OS=Homo sapiens GN=B3GALT.L PE=1 SV=2 |
| 3    | 4.91  | 53.2    | 4   | 14/25            | K465k K466k    | (K)RSIGSKELDQSQKVEKk(T) | 1960.0822                       | 228.0584                   | -12.6                       | 56564.2/7.32       | HUMAN   | RQ6Y288     | REVERSE Beta-1,3-glucosyltransferase OS=Homo sapiens GN=B3GALT.L PE=1 SV=2 |

Detailed Results

| Rank | Score | SPI (%) | BCS | # Unmatched Ions | Variable sites | Sequence                                  | MH <sup>+</sup> Calculated (Da) | MH <sup>+</sup> Error (Da) | MH <sup>+</sup> Error (ppm) | Protein MW/Pl (Da) | Species | Accession # | MS-Digest Index # | Protein Name                                                      |
|------|-------|---------|-----|------------------|----------------|-------------------------------------------|---------------------------------|----------------------------|-----------------------------|--------------------|---------|-------------|-------------------|-------------------------------------------------------------------|
| 1    | 13.39 | 74.7    | 7   | 7/25             | K14k           | (K) D Q L I Y N L L K E E Q T P Q N K (I) | 2074.0815                       | 114.0590                   | 7.4                         | 36688.9/8.44       | HUMAN   | P00338      | 351281            | L-lactate dehydrogenase A chain OS=Homo sapiens GN=LDHA PE=1 SV=2 |

  

| Fragment-ion (m/z)      | 70.064 | 84.081 | 86.094 | 133.061 | 226.085                          | 227.066                         | 244.093 | 278.110 | 309.157 | 340.157                         | 357.177        | 371.188 | 457.197 | 469.224                         | 486.263        | 587.309        | 608.799 <sup>+2</sup> | 714.455 | 721.387 <sup>+2</sup>         | 844.436        | 859.512 <sup>+2</sup> | 916.486 <sup>+2</sup>         | 964.532 <sup>+2</sup>                          | 973.030 <sup>+2</sup>         | 1215.580       |
|-------------------------|--------|--------|--------|---------|----------------------------------|---------------------------------|---------|---------|---------|---------------------------------|----------------|---------|---------|---------------------------------|----------------|----------------|-----------------------|---------|-------------------------------|----------------|-----------------------|-------------------------------|------------------------------------------------|-------------------------------|----------------|
| Frac. Inten. (% of TIC) | 0.00   | 0.18   | 0.16   | 5.83    | 2.21                             | 5.16                            | 12.45   | 2.05    | 2.53    | 2.22                            | 7.15           | 2.13    | 2.13    | 3.71                            | 8.06           | 3.60           | 2.28                  | 2.21    | 2.08                          | 2.57           | 8.22                  | 7.26                          | 3.23                                           | 9.94                          | 2.64           |
| Rel. Inten. (% of BP)   | 0.02   | 1.48   | 1.27   | 46.86   | 17.72                            | 41.46                           | 100.00  | 16.51   | 20.33   | 17.86                           | 57.41          | 17.12   | 17.14   | 29.80                           | 64.77          | 28.96          | 18.29                 | 17.72   | 16.73                         | 20.66          | 66.05                 | 58.37                         | 25.97                                          | 79.83                         | 21.20          |
| Score                   | 0.20   | 0.50   | 0.22   | -0.47   | 0.25                             | 0.25                            | 0.50    | 0.75    | -0.20   | 0.75                            | 0.50           | -0.17   | -0.17   | 0.50                            | 1.50           | 1.50           | -0.18                 | -0.18   | 1.50                          | 1.50           | -0.66                 | 1.50                          | 0.50                                           | 1.50                          | 1.50           |
| Ion-type                | PR     | KQ     | LI     |         | b <sub>2</sub> -H <sub>2</sub> O | b <sub>2</sub> -NH <sub>3</sub> |         | YN      |         | b <sub>3</sub> -NH <sub>3</sub> | b <sub>3</sub> |         |         | y <sub>4</sub> -NH <sub>3</sub> | y <sub>4</sub> | y <sub>5</sub> |                       |         | y <sub>11</sub> <sup>+2</sup> | y <sub>7</sub> |                       | y <sub>14</sub> <sup>+2</sup> | y <sub>15</sub> -NH <sub>3</sub> <sup>+2</sup> | y <sub>15</sub> <sup>+2</sup> | y <sub>9</sub> |
| Delta ppm               | -20.3  | 0.3    | -29.3  |         | 6.5                              | -3.7                            |         | -2.8    |         | -17.0                           | -3.2           |         |         | -36.3                           | -7.6           | -9.3           |                       |         | 1.5                           | 23.5           |                       | 5.7                           | 23.4                                           | 6.8                           | -13.7          |

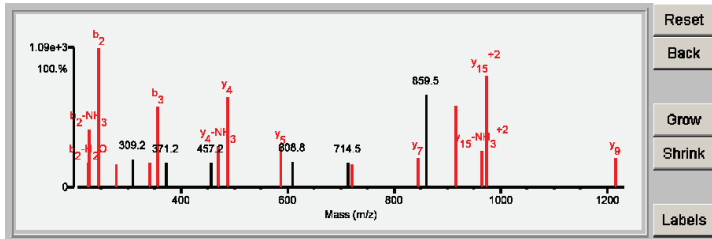

Result Summary

| Rank | Score | SPI (%) | BCS | # Unmatched Ions | Variable sites | Sequence          | MH <sup>+</sup> Calculated (Da) | MH <sup>+</sup> Error (Da) | MH <sup>+</sup> Error (ppm) | Protein MW/pi (Da) | Species | Accession # | Protein Name                                                      |
|------|-------|---------|-----|------------------|----------------|-------------------|---------------------------------|----------------------------|-----------------------------|--------------------|---------|-------------|-------------------------------------------------------------------|
| 1    | 12.47 | 72.7    | 5   | 8/25             | K243k          | (K)QVVEAYEVKLG(G) | 1505.8574                       | 114.0574                   | 8.9                         | 36688.9/8.44       | HUMAN   | P00338      | L-lactate dehydrogenase A chain OS=Homo sapiens GN=LDHA PE=1 SV=2 |
| 2    | 9.49  | 63.6    | 4   | 10/25            | K245k          | (K)QVVEAYEVKLG(G) | 1505.8574                       | 114.0574                   | 8.9                         | 36688.9/8.44       | HUMAN   | P00338      | L-lactate dehydrogenase A chain OS=Homo sapiens GN=LDHA PE=1 SV=2 |

Detailed Results

| Rank | Score | SPI (%) | BCS | # Unmatched Ions | Variable sites | Sequence          | MH <sup>+</sup> Calculated (Da) | MH <sup>+</sup> Error (Da) | MH <sup>+</sup> Error (ppm) | Protein MW/pi (Da) | Species | Accession # | MS-Digest Index # | Protein Name                                                      |
|------|-------|---------|-----|------------------|----------------|-------------------|---------------------------------|----------------------------|-----------------------------|--------------------|---------|-------------|-------------------|-------------------------------------------------------------------|
| 1    | 12.47 | 72.7    | 5   | 8/25             | K243k          | (K)QVVEAYEVKLG(G) | 1505.8574                       | 114.0574                   | 8.9                         | 36688.9/8.44       | HUMAN   | P00338      | 351281            | L-lactate dehydrogenase A chain OS=Homo sapiens GN=LDHA PE=1 SV=2 |

  

| Fragment-Ion (m/z)      | 70.064 | 72.081 | 84.045 | 84.081 | 86.097 | 91.051 | 102.054 | 129.101 | 136.074 | 183.116 | 200.139 | 260.195 | 271.141 | 293.119 | 308.204 | 356.235 | 368.185 | 397.180 | 502.338 | 578.297 | 596.292 | 615.429 | 678.318 | 714.490 | 843.536 |
|-------------------------|--------|--------|--------|--------|--------|--------|---------|---------|---------|---------|---------|---------|---------|---------|---------|---------|---------|---------|---------|---------|---------|---------|---------|---------|---------|
| Frac. Inten. (% of TIC) | 0.20   | 0.77   | 0.20   | 0.40   | 0.27   | 2.74   | 0.20    | 0.22    | 0.68    | 6.95    | 4.93    | 3.08    | 3.61    | 7.19    | 8.53    | 5.96    | 3.52    | 3.29    | 10.19   | 4.35    | 3.65    | 12.38   | 2.65    | 9.26    | 4.78    |
| Rel. Inten. (% of BP)   | 1.64   | 6.20   | 1.61   | 3.19   | 2.14   | 22.13  | 1.60    | 1.79    | 5.50    | 56.14   | 39.80   | 24.86   | 29.18   | 58.07   | 68.89   | 48.16   | 28.42   | 26.61   | 82.33   | 35.15   | 29.46   | 100.00  | 21.43   | 74.81   | 38.59   |
| Score                   | -0.02  | 0.50   | 1.00   | 0.50   | 0.22   | -0.22  |         | 0.20    | 1.00    | -0.56   | 0.50    | 1.50    | -0.29   | 0.75    | 1.50    | 0.75    | -0.28   | -0.27   | 1.50    | -0.35   | 0.25    | 1.50    | -0.21   | 1.50    |         |
| Ion-type                | V      | E      | E      | KQ     | LI     |        | E       | RKQ     | Y       |         | a2      | y2      | YE      | YE      | y++4    | KL      |         |         | y5      | b6-H2O  | y4      | y4      | y5      | y6      |         |
| Delta ppm               |        | 4.5    | 7.3    | 1.5    | 3.2    |        |         | -8.8    | -13.9   |         | -8.7    | -8.7    |         | 17.1    | -28.4   | 12.0    |         |         | 6.9     | -21.2   | 15.9    | 4.4     | 4.4     | 7.4     |         |

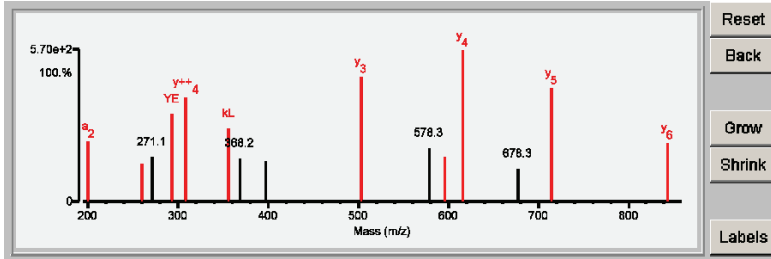



Result Summary

| Rank | Score | SPI (%) | BCS | # Unmatched Ions | Variable sites | Sequence             | MH <sup>+</sup> Calculated (Da) | MH <sup>+</sup> Error (Da) | MH <sup>+</sup> Error (ppm) | Protein MW/pl (Da) | Species | Accession # | Protein Name                                                      |
|------|-------|---------|-----|------------------|----------------|----------------------|---------------------------------|----------------------------|-----------------------------|--------------------|---------|-------------|-------------------------------------------------------------------|
| 1    | 15.86 | 73.3    | 8   | 8/25             | K81k           | (K)IVSGkDYNVTANSK(L) | 1495.7751                       | 114.0488                   | 3.7                         | 36688.9/8.44       | HUMAN   | P00338      | L-lactate dehydrogenase A chain OS=Homo sapiens GN=LDHA PE=1 SV=2 |

Detailed Results

| Rank                   | Score | SPI (%) | BCS    | # Unmatched Ions | Variable sites | Sequence                                           | MH <sup>+</sup> Calculated (Da) | MH <sup>+</sup> Error (Da) | MH <sup>+</sup> Error (ppm) | Protein MW/pl (Da) | Species | Accession # | MS-Digest Index # | Protein Name                                                      |         |         |         |         |         |         |         |         |           |           |         |          |
|------------------------|-------|---------|--------|------------------|----------------|----------------------------------------------------|---------------------------------|----------------------------|-----------------------------|--------------------|---------|-------------|-------------------|-------------------------------------------------------------------|---------|---------|---------|---------|---------|---------|---------|---------|-----------|-----------|---------|----------|
| 1                      | 15.86 | 73.3    | 8      | 8/25             | K81k           | (K)I V S G / k / D / Y N / V / T / A / N / S K (L) | 1495.7751                       | 114.0488                   | 3.7                         | 36688.9/8.44       | HUMAN   | P00338      | 351281            | L-lactate dehydrogenase A chain OS=Homo sapiens GN=LDHA PE=1 SV=2 |         |         |         |         |         |         |         |         |           |           |         |          |
| Fragment-Ion (m/z)     |       | 72.080  | 84.080 | 86.096           | 87.055         | 129.099                                            | 136.073                         | 141.098                    | 153.105                     | 185.165            | 186.167 | 234.143     | 312.674*2         | 333.156                                                           | 348.187 | 387.198 | 419.228 | 502.228 | 520.275 | 551.791 | 600.324 | 619.345 | 627.289*2 | 699.842*2 | 896.425 | 1011.495 |
| Frac. Inten.(% of TIC) |       | 0.22    | 0.32   | 22.83            | 0.18           | 0.18                                               | 0.06                            | 3.31                       | 2.38                        | 8.97               | 6.08    | 7.12        | 2.40              | 2.38                                                              | 2.82    | 4.31    | 2.59    | 4.19    | 7.88    | 2.29    | 2.99    | 3.07    | 2.88      | 4.90      | 3.37    | 2.27     |
| Rel. Inten.(% of BP)   |       | 0.97    | 1.38   | 100.00           | 0.79           | 0.80                                               | 0.28                            | 14.50                      | 10.41                       | 39.29              | 26.64   | 31.18       | 10.49             | 10.41                                                             | 12.37   | 18.86   | 11.36   | 18.35   | 34.51   | 10.05   | 13.11   | 13.45   | 12.63     | 21.45     | 14.77   | 9.93     |
| Score                  |       | 0.50    | 0.50   | 0.50             | 0.33           | 0.20                                               | 1.00                            | -0.15                      | -0.10                       | 0.50               | -0.27   | 1.50        | -0.10             | -0.10                                                             | 1.50    | 0.75    | 1.50    | 0.75    | 1.50    | -0.10   | -0.10   | 1.50    | 1.50      | -0.21     | 1.50    | 1.50     |
| Ion-type               |       | V       | KQ     | a1               | NR             | RKQ                                                | Y                               |                            |                             | a2                 |         | y2          |                   |                                                                   | y3      | SGk     | y4      | SGkD    | y5      |         |         | y6      | Y10*2     |           | y8      | y9       |
| Delta ppm              |       | -16.3   | -6.8   | -15.4            | -4.5           | -25.9                                              | -16.8                           |                            |                             | -7.2               |         | -7.4        |                   |                                                                   | -3.6    | -5.3    | 7.9     | 3.4     | 5.1     |         |         | 6.0     | -32.5     |           | -24.8   | 20.6     |

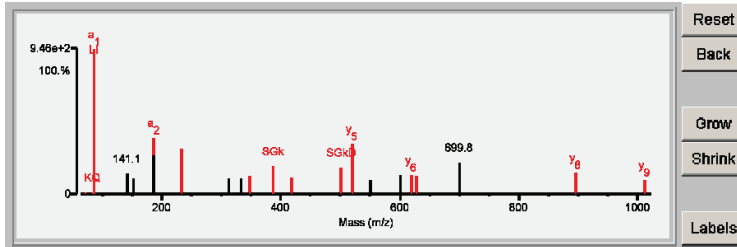

Result Summary

| Rank | Score | SPI (%) | BCS | # Unmatched Ions | # Variable sites | Sequence          | MH <sup>+</sup> Calculated (Da) | MH <sup>+</sup> Error (Da) | MH <sup>+</sup> Error (ppm) | Protein MW/pI (Da) | Species | Accession # | Protein Name                                                      |
|------|-------|---------|-----|------------------|------------------|-------------------|---------------------------------|----------------------------|-----------------------------|--------------------|---------|-------------|-------------------------------------------------------------------|
| 1    | 14.77 | 82.0    | 7   | 5/24             | K244k            | (K)MVESAYEVIKL(G) | 1508.8393                       | 114.0548                   | 7.3                         | 36638.7/5.71       | HUMAN   | P07195      | L-lactate dehydrogenase B chain OS=Homo sapiens GN=LDHB PE=1 SV=2 |
| 2    | 10.26 | 70.0    | 5   | 8/24             | K246k            | (K)MVESAYEVIKL(G) | 1508.8393                       | 114.0548                   | 7.3                         | 36638.7/5.71       | HUMAN   | P07195      | L-lactate dehydrogenase B chain OS=Homo sapiens GN=LDHB PE=1 SV=2 |

Detailed Results

| Rank | Score | SPI (%) | BCS | # Unmatched Ions | # Variable sites | Sequence                                     | MH <sup>+</sup> Calculated (Da) | MH <sup>+</sup> Error (Da) | MH <sup>+</sup> Error (ppm) | Protein MW/pI (Da) | Species | Accession # | MS-Digest Index # | Protein Name                                                      |
|------|-------|---------|-----|------------------|------------------|----------------------------------------------|---------------------------------|----------------------------|-----------------------------|--------------------|---------|-------------|-------------------|-------------------------------------------------------------------|
| 1    | 14.77 | 82.0    | 7   | 5/24             | K244k            | (K)M V V E S A Y / E / V / I / K / L / K (G) | 1508.8393                       | 114.0548                   | 7.3                         | 36638.7/5.71       | HUMAN   | P07195      | 351361            | L-lactate dehydrogenase B chain OS=Homo sapiens GN=LDHB PE=1 SV=2 |

  

| Fragment-ion (m/z)      | 72.080 | 84.044 | 84.081 | 86.096 | 102.055 | 104.052 | 129.101 | 136.075 | 147.111 | 158.099 | 201.124 | 203.121 | 229.117 | 231.116 | 260.198 | 271.142 | 356.227 | 371.178 | 384.225 <sup>+2</sup> | 468.245 | 502.334 | 615.419 | 714.488 | 843.533 |
|-------------------------|--------|--------|--------|--------|---------|---------|---------|---------|---------|---------|---------|---------|---------|---------|---------|---------|---------|---------|-----------------------|---------|---------|---------|---------|---------|
| Frac. Inten. (% of TIC) | 0.64   | 0.18   | 0.49   | 0.36   | 0.19    | 6.61    | 0.17    | 0.68    | 3.37    | 5.29    | 3.55    | 15.66   | 4.22    | 4.89    | 3.39    | 3.45    | 5.23    | 3.38    | 2.96                  | 2.90    | 11.13   | 12.06   | 6.10    | 3.12    |
| Rel. Inten. (% of BP)   | 4.10   | 1.15   | 3.14   | 2.29   | 1.18    | 42.20   | 1.07    | 4.34    | 21.51   | 33.79   | 22.67   | 100.00  | 26.93   | 31.26   | 21.64   | 22.03   | 33.39   | 21.62   | 18.88                 | 18.53   | 71.06   | 77.06   | 38.95   | 19.95   |
| Score                   | 0.50   | 0.50   | 0.50   | 0.22   | 1.00    | 0.50    | 0.20    | 1.00    | 1.50    | -0.34   | 0.50    | 0.50    | 0.75    | 0.50    | 1.50    | -0.22   | 0.75    | -0.22   | -0.19                 | -0.19   | 1.50    | 1.50    | 1.50    | 1.50    |
| Ion-type                | V      | E      | KQ     | LI     | E       | a1      | RKQ     | Y       | y1      |         | EV-28   | a2      | EV      | b2      | y2      |         | kL      |         |                       | y3      | y4      | y5      | y6      |         |
| Delta ppm               | -5.2   |        | -2.1   | -7.3   | 3.4     | -15.8   | -8.1    | -4.3    | -13.6   |         | -4.3    | -7.7    | -10.4   | -4.2    | 4.0     |         | -10.2   |         |                       | -0.5    | -0.2    | 0.5     | 3.4     |         |

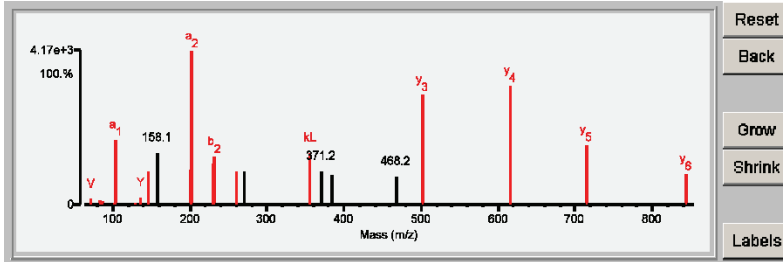

Result Summary

| Rank | Score | SPI (%) | BCS | # Unmatched Ions | Variable sites | Sequence                   | MH <sup>+</sup> Calculated (Da) | MH <sup>+</sup> Error (Da) | MH <sup>+</sup> Error (ppm) | Protein MW (Da) | Species | Accession # | Protein Name                                                                                      |
|------|-------|---------|-----|------------------|----------------|----------------------------|---------------------------------|----------------------------|-----------------------------|-----------------|---------|-------------|---------------------------------------------------------------------------------------------------|
| 1    | 19.36 | 94.0    | 9   | 4/25             | K308k          | (R)GLTSLVQKDKDDEVAQLK(K)   | 2099.1707                       | 114.0505                   | 3.4                         | 36638.7/5.71    | HUMAN   | P07195      | L-lactate dehydrogenase B chain OS=Homo sapiens GN=LDHB PE=1 SV=2                                 |
| 2    | 17.79 | 92.7    | 8   | 5/25             | K310k          | (R)GLTSLVQKDKDDEVAQLK(K)   | 2099.1707                       | 114.0505                   | 3.4                         | 36638.7/5.71    | HUMAN   | P07195      | L-lactate dehydrogenase B chain OS=Homo sapiens GN=LDHB PE=1 SV=2                                 |
| 3    | 16.21 | 91.0    | 7   | 6/25             | K318k          | (R)GLTSLVQKDKDDEVAQLK(K)   | 2099.1707                       | 114.0505                   | 3.4                         | 36638.7/5.71    | HUMAN   | P07195      | L-lactate dehydrogenase B chain OS=Homo sapiens GN=LDHB PE=1 SV=2                                 |
| 4    | 8.75  | 73.3    | 4   | 11/25            | K159k          | (R)GLSSVWLKSGKSDTLSPLAR(S) | 2099.2070                       | 114.0141                   | -13.0                       | 34288.8/9.76    | HUMAN   | RQ725J1     | REVERSE Hydroxysteroid 11-beta-dehydrogenase 1-like protein OS=Homo sapiens GN=HSD11B1L PE=2 SV=1 |
| 5    | 4.71  | 54.4    | 3   | 15/25            | None           | (R)LSRLQRMTLGGELPELAR(L)   | 2213.2071                       | 0.0141                     | 6.4                         | 32868.8/9.65    | HUMAN   | RF29372     | REVERSE DNA-3-methyladenine glycosylase OS=Homo sapiens GN=MPG PE=1 SV=3                          |

Detailed Results

| Rank | Score | SPI (%) | BCS | # Unmatched Ions | Variable sites | Sequence                 | MH <sup>+</sup> Calculated (Da) | MH <sup>+</sup> Error (Da) | MH <sup>+</sup> Error (ppm) | Protein MW (Da) | Species | Accession # | MS-Digest Index # | Protein Name                                                      |
|------|-------|---------|-----|------------------|----------------|--------------------------|---------------------------------|----------------------------|-----------------------------|-----------------|---------|-------------|-------------------|-------------------------------------------------------------------|
| 1    | 19.36 | 94.0    | 9   | 4/25             | K308k          | (R)GLTSLVQKDKDDEVAQLK(K) | 2099.1707                       | 114.0505                   | 3.4                         | 36638.7/5.71    | HUMAN   | P07195      | 351361            | L-lactate dehydrogenase B chain OS=Homo sapiens GN=LDHB PE=1 SV=2 |

  

| Fragment-Ion (m/z)     | 72.080 | 84.080 | 86.095 | 129.101 | 143.116 | 171.110 | 270.140 | 272.157 | 323.166 | 341.180 | 422.242 | 440.248 | 458.257 | 523.282 | 675.696 <sup>+3</sup> | 681.702 <sup>+3</sup> | 700.900 <sup>+2</sup> | 732.405 | 764.914 <sup>+2</sup> | 821.941 <sup>+2</sup> | 878.479 <sup>+2</sup> | 917.459 | 928.018 <sup>+2</sup> | 971.530 <sup>+2</sup> | 1022.056 <sup>+2</sup> |
|------------------------|--------|--------|--------|---------|---------|---------|---------|---------|---------|---------|---------|---------|---------|---------|-----------------------|-----------------------|-----------------------|---------|-----------------------|-----------------------|-----------------------|---------|-----------------------|-----------------------|------------------------|
| Frac. Inten.(% of TIC) | 0.04   | 0.08   | 0.11   | 0.05    | 7.76    | 4.73    | 1.08    | 2.47    | 1.41    | 2.21    | 1.24    | 2.91    | 1.60    | 1.23    | 2.69                  | 7.17                  | 1.38                  | 2.32    | 1.15                  | 10.54                 | 19.29                 | 1.70    | 6.38                  | 11.10                 | 9.35                   |
| Rel. Inten.(% of BP)   | 0.23   | 0.40   | 0.59   | 0.28    | 40.25   | 24.50   | 5.59    | 12.80   | 7.31    | 11.43   | 6.41    | 15.07   | 8.30    | 6.38    | 13.94                 | 37.17                 | 7.18                  | 12.04   | 5.96                  | 54.65                 | 100.00                | 8.80    | 33.06                 | 57.55                 | 48.46                  |
| Score                  | 0.50   | 0.50   | 0.22   | 0.20    | 0.50    | 0.75    | -0.06   | 0.50    | -0.07   | 0.25    | -0.06   | 0.25    | 0.50    | 1.50    | 0.50                  | 1.50                  | 1.50                  | -0.12   | 1.50                  | 1.50                  | 1.50                  | 1.50    | 1.50                  | 1.50                  | 1.50                   |
| Ion-type               | V      | KQ     | LI     | RKQ     | a2      | b2      |         | b3      |         | b4+H2O  |         | b5+H2O  | b5      | y**+9   | y17+H2O <sup>+3</sup> | y17 <sup>+3</sup>     | y1 <sup>+2</sup>      |         | y12 <sup>+2</sup>     | y13 <sup>+2</sup>     | y14 <sup>+2</sup>     | y8      | y15 <sup>+2</sup>     | y16 <sup>+2</sup>     | y17 <sup>+2</sup>      |
| Delta ppm              | -10.8  | -14.0  | -20.0  | -11.1   | -23.7   | -21.0   |         | -15.7   |         | -9.2    |         | -6.7    | -10.7   | 3.4     | -12.5                 | -7.8                  | 13.8                  |         | -7.7                  | -0.7                  | -5.4                  | 1.6     | 0.1                   | -4.1                  | -1.4                   |

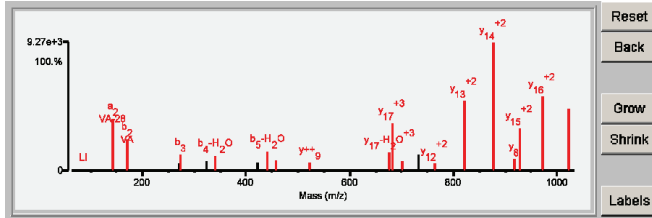

Result Summary

| Rank | Score | SPI (%) | BCS | # Unmatched ions | Variable sites | Sequence                  | MH <sup>+</sup> Calculated (Da) | MH <sup>+</sup> Error (Da) | MH <sup>+</sup> Error (ppm) | Protein MW/pi (Da) | Species | Accession # | Protein Name                                                                       |
|------|-------|---------|-----|------------------|----------------|---------------------------|---------------------------------|----------------------------|-----------------------------|--------------------|---------|-------------|------------------------------------------------------------------------------------|
| 1    | 18.24 | 93.2    | 7   | 2/25             | K308k          | (R)GLTSVINQKLKDEVEAQLK(K) | 2099.1707                       | 114.0507                   | 3.5                         | 36638.7/5.71       | HUMAN   | P07195      | L-lactate dehydrogenase B chain OS=Homo sapiens GN=LDHB PE=1 SV=2                  |
| 1    | 18.24 | 93.2    | 7   | 2/25             | K310k          | (R)GLTSVINQKLKDEVEAQLK(K) | 2099.1707                       | 114.0507                   | 3.5                         | 36638.7/5.71       | HUMAN   | P07195      | L-lactate dehydrogenase B chain OS=Homo sapiens GN=LDHB PE=1 SV=2                  |
| 2    | 10.83 | 68.7    | 3   | 10/25            | None           | (R)QLLEPTLTTSDVDGLSGLK(R) | 2213.2275                       | -0.0061                    | -2.8                        | 75127.6/6.22       | HUMAN   | RQ8WU76     | REVERSE Sec1 family domain-containing protein 2 OS=Homo sapiens GN=SCFD2 PE=1 SV=2 |
| 3    | 9.85  | 64.0    | 4   | 9/25             | M31m           | (K)EKISYLPDVLKNHVLMLGK(F) | 2197.2413                       | 15.9800                    | -6.7                        | 32668.7/6.44       | HUMAN   | RP46926     | REVERSE Glucosamine-6-phosphate isomerase 1 OS=Homo sapiens GN=GNPDA1 PE=1 SV=1    |
| 4    | 9.80  | 64.1    | 3   | 8/25             | K932k          | (K)SQAKVIGLDNVAGVSVTLK(D) | 2099.2070                       | 114.0143                   | -12.9                       | 118401.3/9.37      | HUMAN   | Q9UBC5      | Myosin-1a OS=Homo sapiens GN=MYO1A PE=1 SV=1                                       |

Detailed Results

| Rank                   | Score | SPI (%) | BCS | # Unmatched ions | Variable sites | Sequence                   | MH <sup>+</sup> Calculated (Da) | MH <sup>+</sup> Error (Da) | MH <sup>+</sup> Error (ppm) | Protein MW/pi (Da) | Species | Accession # | MS-Digest Index # | Protein Name                                                      |         |         |         |         |         |         |         |         |         |         |         |         |         |         |                       |                       |                       |      |     |
|------------------------|-------|---------|-----|------------------|----------------|----------------------------|---------------------------------|----------------------------|-----------------------------|--------------------|---------|-------------|-------------------|-------------------------------------------------------------------|---------|---------|---------|---------|---------|---------|---------|---------|---------|---------|---------|---------|---------|---------|-----------------------|-----------------------|-----------------------|------|-----|
| 1                      | 18.24 | 93.2    | 7   | 2/25             | K308k          | (R)GLTSVINQKLVKDEVEAQLK(K) | 2099.1707                       | 114.0507                   | 3.5                         | 36638.7/5.71       | HUMAN   | P07195      | 351361            | L-lactate dehydrogenase B chain OS=Homo sapiens GN=LDHB PE=1 SV=2 |         |         |         |         |         |         |         |         |         |         |         |         |         |         |                       |                       |                       |      |     |
| Fragment-ion (m/z)     |       |         |     |                  |                |                            | 72.080                          | 74.060                     | 84.043                      | 84.080             | 86.096  | 87.056      | 101.070           | 129.102                                                           | 143.116 | 147.112 | 159.110 | 161.092 | 171.110 | 187.106 | 189.089 | 200.101 | 260.198 | 270.143 | 371.225 | 440.249 | 459.289 | 558.361 | 679.313 <sup>+2</sup> | 821.944 <sup>+2</sup> | 878.489 <sup>+2</sup> |      |     |
| Frac. Inten.(% of TIC) |       |         |     |                  |                |                            | 0.51                            | 5.92                       | 0.12                        | 0.46               | 1.19    | 0.09        | 0.11              | 0.26                                                              | 25.69   | 2.90    | 4.20    | 3.63    | 4.65    | 3.75    | 3.16    | 4.26    | 2.67    | 3.78    | 3.21    | 2.65    | 5.39    | 2.60    | 3.06                  | 7.46                  | 8.29                  |      |     |
| Rel. Inten.(% of BP)   |       |         |     |                  |                |                            | 1.98                            | 23.04                      | 0.48                        | 1.79               | 4.64    | 0.37        | 0.44              | 1.00                                                              | 100.00  | 11.27   | 16.33   | 14.13   | 18.11   | 14.60   | 12.28   | 16.56   | 10.40   | 14.72   | 12.47   | 10.31   | 20.96   | 10.13   | 11.89                 | 29.05                 | 32.25                 |      |     |
| Score                  |       |         |     |                  |                |                            | 0.50                            | 1.50                       | 1.00                        | 0.50               | 0.22    | 0.33        | 0.20              | 0.50                                                              | 1.50    | 0.50    | 0.50    | 0.75    | 0.75    | 0.75    | 1.50    | 1.50    | 0.75    | 0.75    | 1.50    | 1.50    | 1.50    | 1.50    | 1.50                  | 1.50                  | 1.50                  | 1.50 |     |
| Ion-type               |       |         |     |                  |                |                            | V                               | y <sup>++1</sup>           | E                           | KQ                 | LI      | NR          | KQ                | RKQ                                                               | a2      | y1      | SV-28   | TS-28   | b2      | SV      | TS      | AQ      | y2      | y3-NH3  | b5-H2O  | y4      | y5      | y5      | y13 <sup>+2</sup>     | y14 <sup>+2</sup>     |                       |      |     |
| Delta ppm              |       |         |     |                  |                |                            | -14.9                           | -4.6                       | -14.2                       | -14.0              | -4.9    | 3.6         |                   | -2.6                                                              | -19.5   | -8.2    | -27.7   | -10.3   | -16.7   | -16.7   | -16.7   | -16.7   | -16.7   | 4.3     | -12.8   | 2.8     | -10.8   | -5.6    | -8.8                  | 0.9                   | 2.5                   | 2.5  | 6.4 |

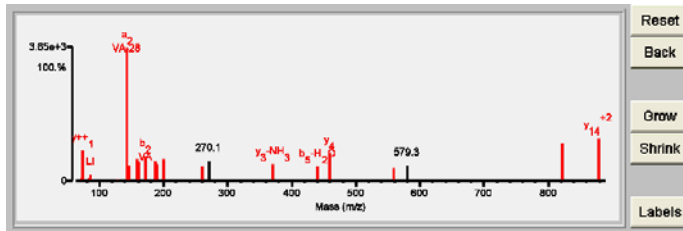

Result Summary

| Rank | Score | SPI (%) | BCS | # Unmatched Ions | # Variable sites | Sequence           | MH <sup>+</sup> Calculated (Da) | MH <sup>+</sup> Error (Da) | MH <sup>+</sup> Error (ppm) | Protein MW/pI (Da) | Species | Accession # | Protein Name                                                         |
|------|-------|---------|-----|------------------|------------------|--------------------|---------------------------------|----------------------------|-----------------------------|--------------------|---------|-------------|----------------------------------------------------------------------|
| 1    | 10.58 | 72.0    | 4   | 9/25             | K152k            | (R)VGCKYQAEIPDR(L) | 1435.6998                       | 114.0551                   | 7.9                         | 75023.5/9.70       | HUMAN   | O94776      | Metastasis-associated protein MTA2 OS=Homo sapiens GN=MTA2 PE=1 SV=1 |

Detailed Results

| Rank | Score | SPI (%) | BCS | # Unmatched Ions | # Variable sites | Sequence                                | MH <sup>+</sup> Calculated (Da) | MH <sup>+</sup> Error (Da) | MH <sup>+</sup> Error (ppm) | Protein MW/pI (Da) | Species | Accession # | MS-Digest Index # | Protein Name                                                         |
|------|-------|---------|-----|------------------|------------------|-----------------------------------------|---------------------------------|----------------------------|-----------------------------|--------------------|---------|-------------|-------------------|----------------------------------------------------------------------|
| 1    | 10.58 | 72.0    | 4   | 9/25             | K152k            | (R) V G C K Y Q / A E / I / P D / R (L) | 1435.6998                       | 114.0551                   | 7.9                         | 75023.5/9.70       | HUMAN   | O94776      | 414541            | Metastasis-associated protein MTA2 OS=Homo sapiens GN=MTA2 PE=1 SV=1 |

  

| Fragment-ion (m/z)      | 70.065 | 72.080 | 75.052 | 84.043 | 84.079 | 86.096 | 102.052 | 129.103 | 133.039 | 136.076 | 141.068 | 175.116 | 201.107 | 244.131 | 292.130 | 314.160 | 347.662 <sup>+2</sup> | 370.165 | 387.197 | 388.196 <sup>+2</sup> | 402.227 | 460.178 | 479.235 | 500.281 | 700.362 |
|-------------------------|--------|--------|--------|--------|--------|--------|---------|---------|---------|---------|---------|---------|---------|---------|---------|---------|-----------------------|---------|---------|-----------------------|---------|---------|---------|---------|---------|
| Frac. Inten. (% of TIC) | 0.00   | 0.46   | 3.29   | 0.14   | 0.41   | 0.33   | 0.12    | 5.69    | 5.33    | 0.15    | 2.61    | 5.05    | 3.03    | 3.85    | 3.95    | 7.92    | 6.15                  | 6.95    | 12.18   | 3.80                  | 2.79    | 4.05    | 3.42    | 6.92    | 11.39   |
| Rel. Inten. (% of BP)   | 0.04   | 3.79   | 26.98  | 1.17   | 3.33   | 2.69   | 1.02    | 46.73   | 43.79   | 1.22    | 21.46   | 41.45   | 24.85   | 31.63   | 32.42   | 65.00   | 50.48                 | 57.02   | 100.00  | 31.18                 | 22.94   | 33.27   | 28.11   | 56.77   | 93.51   |
| Score                   | 0.20   | 0.50   | -0.21  | 1.00   | 0.50   | 0.22   |         | 0.50    | -0.35   | 1.00    | -0.17   | 1.50    | -0.20   | -0.25   | 0.75    | 0.75    | 0.75                  | 0.50    | 1.50    | -0.25                 | -0.18   | -0.26   | -0.22   | 1.50    | 1.50    |
| Ion-type                | PR     | a1     |        | E      | KQ     | LI     | E       | a2      |         | Y       |         | y1      |         |         | YQ      | AEI     | a5 <sup>+</sup>       | y3-NH3  | y3      |                       |         |         |         | y4      | y6      |
| Delta ppm               | -1.8   | -27.4  |        | -20.1  | -25.9  | -10.8  |         | -4.9    |         | -1.4    |         | -18.0   |         |         | -1.0    | -38.3   |                       | -18.4   | -5.6    |                       |         |         |         | -3.6    | -0.8    |
|                         |        | 0.50   |        |        |        |        |         | 0.50    |         |         |         |         |         |         |         |         | CkYQ <sup>+</sup>     |         |         |                       |         |         |         |         |         |
|                         |        | -12.1  |        |        |        |        |         | 3.6     |         |         |         |         |         |         |         |         | 25.5                  |         |         |                       |         |         |         |         |         |

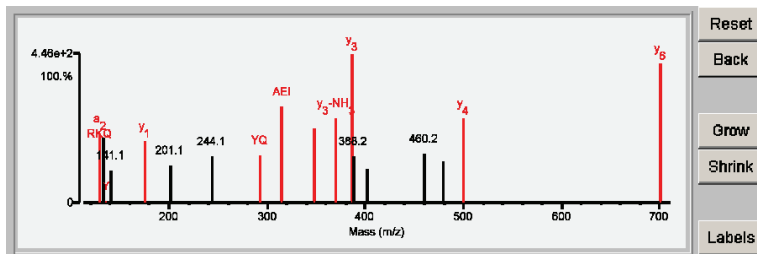

Result Summary

| Rank | Score | SPI (%) | BCS | # Unmatched Ions | Variable sites | Sequence                | MH <sup>+</sup> Calculated (Da) | MH <sup>+</sup> Error (Da) | MH <sup>+</sup> Error (ppm) | Protein MW/pl (Da) | Species | Accession # | Protein Name                                                           |
|------|-------|---------|-----|------------------|----------------|-------------------------|---------------------------------|----------------------------|-----------------------------|--------------------|---------|-------------|------------------------------------------------------------------------|
| 1    | 15.34 | 75.5    | 7   | 8/25             | K241k          | (K)SFEAPIKLVFPQDLLEK(G) | 1974.0946                       | 114.0541                   | 5.4                         | 41488.6/6.00       | HUMAN   | Q8TCT9      | Minor histocompatibility antigen H13 OS=Homo sapiens GN=HM13 PE=1 SV=1 |

Detailed Results

| Rank                   | Score | SPI (%) | BCS    | # Unmatched Ions | Variable sites | Sequence                | MH <sup>+</sup> Calculated (Da) | MH <sup>+</sup> Error (Da) | MH <sup>+</sup> Error (ppm) | Protein MW/pl (Da) | Species | Accession # | MS-Digest Index # | Protein Name                                                           |                       |                  |                       |         |         |                       |         |                       |                       |         |         |          |
|------------------------|-------|---------|--------|------------------|----------------|-------------------------|---------------------------------|----------------------------|-----------------------------|--------------------|---------|-------------|-------------------|------------------------------------------------------------------------|-----------------------|------------------|-----------------------|---------|---------|-----------------------|---------|-----------------------|-----------------------|---------|---------|----------|
| 1                      | 15.34 | 75.5    | 7      | 8/25             | K241k          | (K)SFEAPIKLVFPQDLLEK(G) | 1974.0946                       | 114.0541                   | 5.4                         | 41488.6/6.00       | HUMAN   | Q8TCT9      | 292483            | Minor histocompatibility antigen H13 OS=Homo sapiens GN=HM13 PE=1 SV=1 |                       |                  |                       |         |         |                       |         |                       |                       |         |         |          |
| Fragment-ion (m/z)     |       | 84.082  | 86.094 | 102.051          | 120.077        | 147.111                 | 207.109                         | 215.133                    | 235.103                     | 236.108            | 247.103 | 341.147     | 364.149           | 421.744 <sup>+2</sup>                                                  | 435.180 <sup>+2</sup> | 455.282          | 495.256 <sup>+2</sup> | 552.342 | 689.386 | 827.483 <sup>+2</sup> | 842.456 | 843.437 <sup>+2</sup> | 862.986 <sup>+2</sup> | 883.545 | 989.525 | 1088.630 |
| Frac. Inten.(% of TIC) |       | 0.10    | 0.17   | 0.18             | 0.25           | 4.42                    | 10.18                           | 2.67                       | 10.26                       | 3.05               | 2.46    | 3.42        | 5.13              | 6.71                                                                   | 4.02                  | 3.37             | 4.56                  | 3.00    | 2.26    | 8.46                  | 3.20    | 4.57                  | 4.41                  | 2.45    | 7.89    | 2.83     |
| Rel. Inten.(% of BP)   |       | 1.02    | 1.69   | 1.71             | 2.39           | 43.03                   | 99.25                           | 26.02                      | 100.00                      | 29.68              | 24.00   | 33.31       | 49.94             | 65.38                                                                  | 39.14                 | 32.86            | 44.45                 | 29.20   | 21.98   | 82.43                 | 31.14   | 44.56                 | 42.99                 | 23.85   | 76.90   | 27.59    |
| Score                  |       | 0.50    | 0.22   | 1.00             | 1.00           | 1.50                    | 0.50                            | -0.26                      | 0.50                        | -0.30              | -0.24   | 0.75        | 0.50              | 1.50                                                                   | -0.39                 | 0.75             | 1.50                  | -0.29   | -0.22   | 1.50                  | 1.50    | -0.45                 | 1.50                  | -0.24   | 1.50    | 28.8     |
| Ion-type               |       | KQ      | LI     | E                | F              | y1                      | a2                              |                            | b2                          |                    | PQD     | b3          | y7 <sup>+2</sup>  |                                                                        | kLV                   | y8 <sup>+2</sup> |                       |         |         | y13 <sup>+2</sup>     | y7      |                       | y14 <sup>+2</sup>     |         | y8      | y9       |
| Delta ppm              |       | 18.1    | -28.2  | -34.8            | -32.3          | -11.6                   | -24.1                           |                            | -23.9                       |                    |         | 1.6         | -5.2              |                                                                        | 22.5                  |                  | -25.0                 |         |         | 0.4                   | -6.7    |                       | -17.5                 |         | -5.2    | 28.8     |

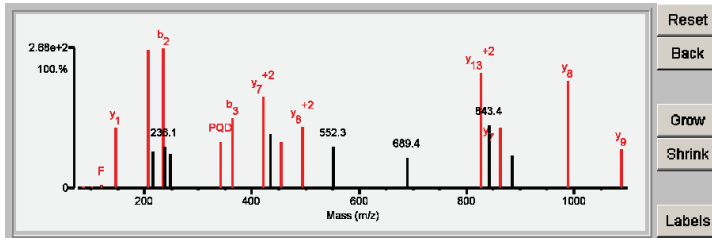

Reset

Back

Grow

Shrink

Labels

Result Summary

| Rank | Score | SPI (%) | BCS | # Unmatched Ions | Variable sites | Sequence                     | MH <sup>+</sup> Calculated (Da) | MH <sup>+</sup> Error (Da) | MH <sup>+</sup> Error (ppm) | Protein MW (Da) | Species | Accession # | Protein Name                                                                                      |
|------|-------|---------|-----|------------------|----------------|------------------------------|---------------------------------|----------------------------|-----------------------------|-----------------|---------|-------------|---------------------------------------------------------------------------------------------------|
| 1    | 23.78 | 90.7    | 15  | 3/25             | K27k           | (K)LDPLIMEQVYQVAVANAEQLLR(M) | 2776.5390                       | 114.0651                   | 7.7                         | 10500.1/8.42    | HUMAN   | Q9Y5L4      | Mitochondrial import inner membrane translocase subunit Tim13 OS=Homo sapiens GN=TIMM13 PE=1 SV=1 |

Detailed Results

| Rank                                                                                                                                                                                                                                                                                                                                                                                                                                                                                                                                                                                                                                                                                                                                                                                                                                                                                                                                                                                                                                                                                                                                                                                                                                                                                                                                                                                                                                                                                                                                                                                                                                                                                                                                                                                                                                                                                                                                                                                                                                                                                                                                                                                                                                                                                                                                                                                                                                                                                                                                                                                                                               | Score  | SPI (%) | BCS     | # Unmatched Ions | Variable sites | Sequence                     | MH <sup>+</sup> Calculated (Da) | MH <sup>+</sup> Error (Da) | MH <sup>+</sup> Error (ppm) | Protein MW (Da) | Species               | Accession # | MS-Digest Index # | Protein Name                                                                                      |                    |         |                       |                       |         |          |          |                        |                   |                        |          |                       |         |         |         |         |         |                       |                       |         |          |          |                        |          |                        |          |                         |      |      |      |      |      |      |      |      |      |      |      |      |      |      |      |      |      |      |      |      |      |      |      |      |      |                       |      |       |       |       |       |       |       |       |       |       |       |       |       |       |       |       |       |       |       |       |       |        |       |       |       |       |      |      |      |      |      |      |      |      |      |      |       |      |      |      |      |       |      |      |      |      |      |      |       |      |      |          |    |    |     |    |    |    |    |    |    |    |  |    |        |    |    |  |                       |                   |    |    |     |                   |                   |     |           |       |      |      |      |       |      |      |      |      |     |  |      |       |     |     |  |      |      |      |     |      |      |  |     |     |
|------------------------------------------------------------------------------------------------------------------------------------------------------------------------------------------------------------------------------------------------------------------------------------------------------------------------------------------------------------------------------------------------------------------------------------------------------------------------------------------------------------------------------------------------------------------------------------------------------------------------------------------------------------------------------------------------------------------------------------------------------------------------------------------------------------------------------------------------------------------------------------------------------------------------------------------------------------------------------------------------------------------------------------------------------------------------------------------------------------------------------------------------------------------------------------------------------------------------------------------------------------------------------------------------------------------------------------------------------------------------------------------------------------------------------------------------------------------------------------------------------------------------------------------------------------------------------------------------------------------------------------------------------------------------------------------------------------------------------------------------------------------------------------------------------------------------------------------------------------------------------------------------------------------------------------------------------------------------------------------------------------------------------------------------------------------------------------------------------------------------------------------------------------------------------------------------------------------------------------------------------------------------------------------------------------------------------------------------------------------------------------------------------------------------------------------------------------------------------------------------------------------------------------------------------------------------------------------------------------------------------------|--------|---------|---------|------------------|----------------|------------------------------|---------------------------------|----------------------------|-----------------------------|-----------------|-----------------------|-------------|-------------------|---------------------------------------------------------------------------------------------------|--------------------|---------|-----------------------|-----------------------|---------|----------|----------|------------------------|-------------------|------------------------|----------|-----------------------|---------|---------|---------|---------|---------|-----------------------|-----------------------|---------|----------|----------|------------------------|----------|------------------------|----------|-------------------------|------|------|------|------|------|------|------|------|------|------|------|------|------|------|------|------|------|------|------|------|------|------|------|------|------|-----------------------|------|-------|-------|-------|-------|-------|-------|-------|-------|-------|-------|-------|-------|-------|-------|-------|-------|-------|-------|-------|-------|--------|-------|-------|-------|-------|------|------|------|------|------|------|------|------|------|------|-------|------|------|------|------|-------|------|------|------|------|------|------|-------|------|------|----------|----|----|-----|----|----|----|----|----|----|----|--|----|--------|----|----|--|-----------------------|-------------------|----|----|-----|-------------------|-------------------|-----|-----------|-------|------|------|------|-------|------|------|------|------|-----|--|------|-------|-----|-----|--|------|------|------|-----|------|------|--|-----|-----|
| 1                                                                                                                                                                                                                                                                                                                                                                                                                                                                                                                                                                                                                                                                                                                                                                                                                                                                                                                                                                                                                                                                                                                                                                                                                                                                                                                                                                                                                                                                                                                                                                                                                                                                                                                                                                                                                                                                                                                                                                                                                                                                                                                                                                                                                                                                                                                                                                                                                                                                                                                                                                                                                                  | 23.78  | 90.7    | 15      | 3/25             | K27k           | (K)LDPLIMEQVYQVAVANAEQLLR(M) | 2776.5390                       | 114.0651                   | 7.7                         | 10500.1/8.42    | HUMAN                 | Q9Y5L4      | 783265            | Mitochondrial import inner membrane translocase subunit Tim13 OS=Homo sapiens GN=TIMM13 PE=1 SV=1 |                    |         |                       |                       |         |          |          |                        |                   |                        |          |                       |         |         |         |         |         |                       |                       |         |          |          |                        |          |                        |          |                         |      |      |      |      |      |      |      |      |      |      |      |      |      |      |      |      |      |      |      |      |      |      |      |      |      |                       |      |       |       |       |       |       |       |       |       |       |       |       |       |       |       |       |       |       |       |       |       |        |       |       |       |       |      |      |      |      |      |      |      |      |      |      |       |      |      |      |      |       |      |      |      |      |      |      |       |      |      |          |    |    |     |    |    |    |    |    |    |    |  |    |        |    |    |  |                       |                   |    |    |     |                   |                   |     |           |       |      |      |      |       |      |      |      |      |     |  |      |       |     |     |  |      |      |      |     |      |      |  |     |     |
| <table border="1"> <thead> <tr> <th>Fragment-Ion (m/z)</th> <th>84.079</th> <th>175.118</th> <th>268.165</th> <th>303.175</th> <th>355.191</th> <th>416.259</th> <th>496.275</th> <th>529.341</th> <th>609.358</th> <th>658.391</th> <th>669.365<sup>+2</sup></th> <th>740.411</th> <th>769.403</th> <th>786.447</th> <th>857.484</th> <th>868.462</th> <th>882.502<sup>+3</sup></th> <th>888.160<sup>+3</sup></th> <th>971.540</th> <th>1042.568</th> <th>1096.568</th> <th>1141.633<sup>+2</sup></th> <th>1180.663</th> <th>1198.171<sup>+2</sup></th> <th>1212.676</th> </tr> </thead> <tbody> <tr> <td>Frac. Inten. (% of TIC)</td> <td>0.06</td> <td>2.58</td> <td>2.95</td> <td>2.92</td> <td>1.97</td> <td>4.13</td> <td>5.38</td> <td>2.83</td> <td>5.76</td> <td>2.67</td> <td>2.12</td> <td>2.07</td> <td>1.91</td> <td>3.13</td> <td>3.64</td> <td>4.74</td> <td>5.45</td> <td>6.66</td> <td>6.79</td> <td>9.16</td> <td>2.52</td> <td>9.57</td> <td>2.40</td> <td>2.65</td> <td>5.93</td> </tr> <tr> <td>Rel. Inten. (% of BP)</td> <td>0.66</td> <td>26.98</td> <td>30.83</td> <td>30.49</td> <td>20.56</td> <td>43.12</td> <td>56.20</td> <td>29.61</td> <td>60.16</td> <td>27.92</td> <td>22.17</td> <td>21.59</td> <td>19.96</td> <td>32.73</td> <td>38.07</td> <td>49.56</td> <td>56.96</td> <td>69.57</td> <td>70.90</td> <td>95.68</td> <td>26.36</td> <td>100.00</td> <td>25.12</td> <td>27.69</td> <td>61.99</td> </tr> <tr> <td>Score</td> <td>0.50</td> <td>1.50</td> <td>0.75</td> <td>1.50</td> <td>0.50</td> <td>1.50</td> <td>0.75</td> <td>1.50</td> <td>0.50</td> <td>1.50</td> <td>-0.22</td> <td>0.75</td> <td>0.50</td> <td>1.50</td> <td>1.50</td> <td>-0.50</td> <td>0.50</td> <td>1.50</td> <td>1.50</td> <td>0.50</td> <td>0.50</td> <td>1.50</td> <td>-0.25</td> <td>1.50</td> <td>1.50</td> </tr> <tr> <td>Ion-type</td> <td>KQ</td> <td>Y1</td> <td>PGL</td> <td>Y2</td> <td>#4</td> <td>Y3</td> <td>b5</td> <td>Y4</td> <td>b6</td> <td>Y5</td> <td></td> <td>b7</td> <td>Y6-NH3</td> <td>Y6</td> <td>Y7</td> <td></td> <td>Y23-NH3<sup>+3</sup></td> <td>Y23<sup>+3</sup></td> <td>Y8</td> <td>Y9</td> <td>b10</td> <td>Y19<sup>+2</sup></td> <td>Y20<sup>+2</sup></td> <td>Y11</td> </tr> <tr> <td>Delta ppm</td> <td>-15.2</td> <td>-7.1</td> <td>-5.8</td> <td>-8.3</td> <td>-20.8</td> <td>-5.8</td> <td>-6.2</td> <td>-9.6</td> <td>-5.5</td> <td>4.2</td> <td></td> <td>11.5</td> <td>-22.2</td> <td>0.9</td> <td>0.4</td> <td></td> <td>17.6</td> <td>-2.5</td> <td>13.8</td> <td>3.4</td> <td>-3.8</td> <td>12.9</td> <td></td> <td>9.2</td> <td>5.4</td> </tr> </tbody> </table> |        |         |         |                  |                |                              |                                 |                            |                             |                 |                       |             |                   |                                                                                                   | Fragment-Ion (m/z) | 84.079  | 175.118               | 268.165               | 303.175 | 355.191  | 416.259  | 496.275                | 529.341           | 609.358                | 658.391  | 669.365 <sup>+2</sup> | 740.411 | 769.403 | 786.447 | 857.484 | 868.462 | 882.502 <sup>+3</sup> | 888.160 <sup>+3</sup> | 971.540 | 1042.568 | 1096.568 | 1141.633 <sup>+2</sup> | 1180.663 | 1198.171 <sup>+2</sup> | 1212.676 | Frac. Inten. (% of TIC) | 0.06 | 2.58 | 2.95 | 2.92 | 1.97 | 4.13 | 5.38 | 2.83 | 5.76 | 2.67 | 2.12 | 2.07 | 1.91 | 3.13 | 3.64 | 4.74 | 5.45 | 6.66 | 6.79 | 9.16 | 2.52 | 9.57 | 2.40 | 2.65 | 5.93 | Rel. Inten. (% of BP) | 0.66 | 26.98 | 30.83 | 30.49 | 20.56 | 43.12 | 56.20 | 29.61 | 60.16 | 27.92 | 22.17 | 21.59 | 19.96 | 32.73 | 38.07 | 49.56 | 56.96 | 69.57 | 70.90 | 95.68 | 26.36 | 100.00 | 25.12 | 27.69 | 61.99 | Score | 0.50 | 1.50 | 0.75 | 1.50 | 0.50 | 1.50 | 0.75 | 1.50 | 0.50 | 1.50 | -0.22 | 0.75 | 0.50 | 1.50 | 1.50 | -0.50 | 0.50 | 1.50 | 1.50 | 0.50 | 0.50 | 1.50 | -0.25 | 1.50 | 1.50 | Ion-type | KQ | Y1 | PGL | Y2 | #4 | Y3 | b5 | Y4 | b6 | Y5 |  | b7 | Y6-NH3 | Y6 | Y7 |  | Y23-NH3 <sup>+3</sup> | Y23 <sup>+3</sup> | Y8 | Y9 | b10 | Y19 <sup>+2</sup> | Y20 <sup>+2</sup> | Y11 | Delta ppm | -15.2 | -7.1 | -5.8 | -8.3 | -20.8 | -5.8 | -6.2 | -9.6 | -5.5 | 4.2 |  | 11.5 | -22.2 | 0.9 | 0.4 |  | 17.6 | -2.5 | 13.8 | 3.4 | -3.8 | 12.9 |  | 9.2 | 5.4 |
| Fragment-Ion (m/z)                                                                                                                                                                                                                                                                                                                                                                                                                                                                                                                                                                                                                                                                                                                                                                                                                                                                                                                                                                                                                                                                                                                                                                                                                                                                                                                                                                                                                                                                                                                                                                                                                                                                                                                                                                                                                                                                                                                                                                                                                                                                                                                                                                                                                                                                                                                                                                                                                                                                                                                                                                                                                 | 84.079 | 175.118 | 268.165 | 303.175          | 355.191        | 416.259                      | 496.275                         | 529.341                    | 609.358                     | 658.391         | 669.365 <sup>+2</sup> | 740.411     | 769.403           | 786.447                                                                                           | 857.484            | 868.462 | 882.502 <sup>+3</sup> | 888.160 <sup>+3</sup> | 971.540 | 1042.568 | 1096.568 | 1141.633 <sup>+2</sup> | 1180.663          | 1198.171 <sup>+2</sup> | 1212.676 |                       |         |         |         |         |         |                       |                       |         |          |          |                        |          |                        |          |                         |      |      |      |      |      |      |      |      |      |      |      |      |      |      |      |      |      |      |      |      |      |      |      |      |      |                       |      |       |       |       |       |       |       |       |       |       |       |       |       |       |       |       |       |       |       |       |       |        |       |       |       |       |      |      |      |      |      |      |      |      |      |      |       |      |      |      |      |       |      |      |      |      |      |      |       |      |      |          |    |    |     |    |    |    |    |    |    |    |  |    |        |    |    |  |                       |                   |    |    |     |                   |                   |     |           |       |      |      |      |       |      |      |      |      |     |  |      |       |     |     |  |      |      |      |     |      |      |  |     |     |
| Frac. Inten. (% of TIC)                                                                                                                                                                                                                                                                                                                                                                                                                                                                                                                                                                                                                                                                                                                                                                                                                                                                                                                                                                                                                                                                                                                                                                                                                                                                                                                                                                                                                                                                                                                                                                                                                                                                                                                                                                                                                                                                                                                                                                                                                                                                                                                                                                                                                                                                                                                                                                                                                                                                                                                                                                                                            | 0.06   | 2.58    | 2.95    | 2.92             | 1.97           | 4.13                         | 5.38                            | 2.83                       | 5.76                        | 2.67            | 2.12                  | 2.07        | 1.91              | 3.13                                                                                              | 3.64               | 4.74    | 5.45                  | 6.66                  | 6.79    | 9.16     | 2.52     | 9.57                   | 2.40              | 2.65                   | 5.93     |                       |         |         |         |         |         |                       |                       |         |          |          |                        |          |                        |          |                         |      |      |      |      |      |      |      |      |      |      |      |      |      |      |      |      |      |      |      |      |      |      |      |      |      |                       |      |       |       |       |       |       |       |       |       |       |       |       |       |       |       |       |       |       |       |       |       |        |       |       |       |       |      |      |      |      |      |      |      |      |      |      |       |      |      |      |      |       |      |      |      |      |      |      |       |      |      |          |    |    |     |    |    |    |    |    |    |    |  |    |        |    |    |  |                       |                   |    |    |     |                   |                   |     |           |       |      |      |      |       |      |      |      |      |     |  |      |       |     |     |  |      |      |      |     |      |      |  |     |     |
| Rel. Inten. (% of BP)                                                                                                                                                                                                                                                                                                                                                                                                                                                                                                                                                                                                                                                                                                                                                                                                                                                                                                                                                                                                                                                                                                                                                                                                                                                                                                                                                                                                                                                                                                                                                                                                                                                                                                                                                                                                                                                                                                                                                                                                                                                                                                                                                                                                                                                                                                                                                                                                                                                                                                                                                                                                              | 0.66   | 26.98   | 30.83   | 30.49            | 20.56          | 43.12                        | 56.20                           | 29.61                      | 60.16                       | 27.92           | 22.17                 | 21.59       | 19.96             | 32.73                                                                                             | 38.07              | 49.56   | 56.96                 | 69.57                 | 70.90   | 95.68    | 26.36    | 100.00                 | 25.12             | 27.69                  | 61.99    |                       |         |         |         |         |         |                       |                       |         |          |          |                        |          |                        |          |                         |      |      |      |      |      |      |      |      |      |      |      |      |      |      |      |      |      |      |      |      |      |      |      |      |      |                       |      |       |       |       |       |       |       |       |       |       |       |       |       |       |       |       |       |       |       |       |       |        |       |       |       |       |      |      |      |      |      |      |      |      |      |      |       |      |      |      |      |       |      |      |      |      |      |      |       |      |      |          |    |    |     |    |    |    |    |    |    |    |  |    |        |    |    |  |                       |                   |    |    |     |                   |                   |     |           |       |      |      |      |       |      |      |      |      |     |  |      |       |     |     |  |      |      |      |     |      |      |  |     |     |
| Score                                                                                                                                                                                                                                                                                                                                                                                                                                                                                                                                                                                                                                                                                                                                                                                                                                                                                                                                                                                                                                                                                                                                                                                                                                                                                                                                                                                                                                                                                                                                                                                                                                                                                                                                                                                                                                                                                                                                                                                                                                                                                                                                                                                                                                                                                                                                                                                                                                                                                                                                                                                                                              | 0.50   | 1.50    | 0.75    | 1.50             | 0.50           | 1.50                         | 0.75                            | 1.50                       | 0.50                        | 1.50            | -0.22                 | 0.75        | 0.50              | 1.50                                                                                              | 1.50               | -0.50   | 0.50                  | 1.50                  | 1.50    | 0.50     | 0.50     | 1.50                   | -0.25             | 1.50                   | 1.50     |                       |         |         |         |         |         |                       |                       |         |          |          |                        |          |                        |          |                         |      |      |      |      |      |      |      |      |      |      |      |      |      |      |      |      |      |      |      |      |      |      |      |      |      |                       |      |       |       |       |       |       |       |       |       |       |       |       |       |       |       |       |       |       |       |       |       |        |       |       |       |       |      |      |      |      |      |      |      |      |      |      |       |      |      |      |      |       |      |      |      |      |      |      |       |      |      |          |    |    |     |    |    |    |    |    |    |    |  |    |        |    |    |  |                       |                   |    |    |     |                   |                   |     |           |       |      |      |      |       |      |      |      |      |     |  |      |       |     |     |  |      |      |      |     |      |      |  |     |     |
| Ion-type                                                                                                                                                                                                                                                                                                                                                                                                                                                                                                                                                                                                                                                                                                                                                                                                                                                                                                                                                                                                                                                                                                                                                                                                                                                                                                                                                                                                                                                                                                                                                                                                                                                                                                                                                                                                                                                                                                                                                                                                                                                                                                                                                                                                                                                                                                                                                                                                                                                                                                                                                                                                                           | KQ     | Y1      | PGL     | Y2               | #4             | Y3                           | b5                              | Y4                         | b6                          | Y5              |                       | b7          | Y6-NH3            | Y6                                                                                                | Y7                 |         | Y23-NH3 <sup>+3</sup> | Y23 <sup>+3</sup>     | Y8      | Y9       | b10      | Y19 <sup>+2</sup>      | Y20 <sup>+2</sup> | Y11                    |          |                       |         |         |         |         |         |                       |                       |         |          |          |                        |          |                        |          |                         |      |      |      |      |      |      |      |      |      |      |      |      |      |      |      |      |      |      |      |      |      |      |      |      |      |                       |      |       |       |       |       |       |       |       |       |       |       |       |       |       |       |       |       |       |       |       |       |        |       |       |       |       |      |      |      |      |      |      |      |      |      |      |       |      |      |      |      |       |      |      |      |      |      |      |       |      |      |          |    |    |     |    |    |    |    |    |    |    |  |    |        |    |    |  |                       |                   |    |    |     |                   |                   |     |           |       |      |      |      |       |      |      |      |      |     |  |      |       |     |     |  |      |      |      |     |      |      |  |     |     |
| Delta ppm                                                                                                                                                                                                                                                                                                                                                                                                                                                                                                                                                                                                                                                                                                                                                                                                                                                                                                                                                                                                                                                                                                                                                                                                                                                                                                                                                                                                                                                                                                                                                                                                                                                                                                                                                                                                                                                                                                                                                                                                                                                                                                                                                                                                                                                                                                                                                                                                                                                                                                                                                                                                                          | -15.2  | -7.1    | -5.8    | -8.3             | -20.8          | -5.8                         | -6.2                            | -9.6                       | -5.5                        | 4.2             |                       | 11.5        | -22.2             | 0.9                                                                                               | 0.4                |         | 17.6                  | -2.5                  | 13.8    | 3.4      | -3.8     | 12.9                   |                   | 9.2                    | 5.4      |                       |         |         |         |         |         |                       |                       |         |          |          |                        |          |                        |          |                         |      |      |      |      |      |      |      |      |      |      |      |      |      |      |      |      |      |      |      |      |      |      |      |      |      |                       |      |       |       |       |       |       |       |       |       |       |       |       |       |       |       |       |       |       |       |       |       |        |       |       |       |       |      |      |      |      |      |      |      |      |      |      |       |      |      |      |      |       |      |      |      |      |      |      |       |      |      |          |    |    |     |    |    |    |    |    |    |    |  |    |        |    |    |  |                       |                   |    |    |     |                   |                   |     |           |       |      |      |      |       |      |      |      |      |     |  |      |       |     |     |  |      |      |      |     |      |      |  |     |     |

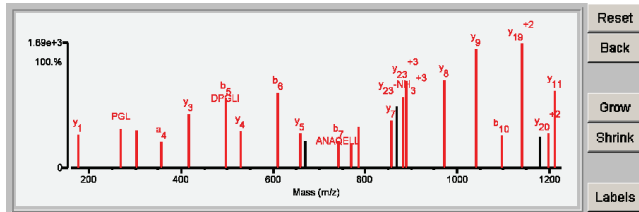

Result Summary

| Rank | Score | SPI (%) | BCS | # Unmatched ions | Variable sites | Sequence                          | MH <sup>+</sup> Calculated (Da) | MH <sup>+</sup> Error (Da) | MH <sup>+</sup> Error (ppm) | Protein MW/pl (Da) | Species | Accession #            | Protein Name                                                                                     |
|------|-------|---------|-----|------------------|----------------|-----------------------------------|---------------------------------|----------------------------|-----------------------------|--------------------|---------|------------------------|--------------------------------------------------------------------------------------------------|
| 1    | 13.70 | 63.3    | 7   | 7/25             | K312k          | (R)TVLEHYALEDDP L/A/A/F/K/Q/R (Q) | 2216.1346                       | 114.0760                   | 14.2                        | 39646.4/8.55       | HUMAN   | <a href="#">Q3ZCQ8</a> | Mitochondrial import inner membrane translocase subunit TIM50 OS=Homo sapiens GN=TIM50 PE=1 SV=2 |

Detailed Results

| Rank | Score | SPI (%) | BCS | # Unmatched ions | Variable sites | Sequence                                                 | MH <sup>+</sup> Calculated (Da) | MH <sup>+</sup> Error (Da) | MH <sup>+</sup> Error (ppm) | Protein MW/pl (Da) | Species | Accession #            | MS-Digest Index #      | Protein Name                                                                                     |
|------|-------|---------|-----|------------------|----------------|----------------------------------------------------------|---------------------------------|----------------------------|-----------------------------|--------------------|---------|------------------------|------------------------|--------------------------------------------------------------------------------------------------|
| 1    | 13.70 | 63.3    | 7   | 7/25             | K312k          | (R)T V L E H Y A L E D D P L / A / A / F / K / Q / R (Q) | 2216.1346                       | 114.0760                   | 14.2                        | 39646.4/8.55       | HUMAN   | <a href="#">Q3ZCQ8</a> | <a href="#">783499</a> | Mitochondrial import inner membrane translocase subunit TIM50 OS=Homo sapiens GN=TIM50 PE=1 SV=2 |

  

| Fragment-ion (m/z)     | 70.064 | 72.080 | 74.061 | 84.046 | 84.082 | 86.096 | 104.049 | 110.071 | 120.079 | 129.105 | 136.070 | 173.128 | 175.114 | 183.144 | 201.122 | 273.157 | 303.169 | 341.108 | 341.221 | 346.697 <sup>+2</sup> | 543.329 <sup>+3</sup> | 692.381 | 702.398 | 763.400 | 834.454 |
|------------------------|--------|--------|--------|--------|--------|--------|---------|---------|---------|---------|---------|---------|---------|---------|---------|---------|---------|---------|---------|-----------------------|-----------------------|---------|---------|---------|---------|
| Frac. Inten.(% of TIC) | 0.01   | 0.28   | 7.36   | 0.23   | 0.35   | 0.94   | 4.95    | 0.12    | 0.12    | 0.18    | 3.72    | 11.56   | 7.14    | 9.38    | 6.45    | 4.21    | 3.98    | 4.51    | 6.26    | 5.01                  | 4.10                  | 7.32    | 3.75    | 4.06    | 4.01    |
| Rel. Inten.(% of BP)   | 0.08   | 2.39   | 63.63  | 1.99   | 3.00   | 8.10   | 42.84   | 1.08    | 1.05    | 1.52    | 32.16   | 100.00  | 61.77   | 81.14   | 55.77   | 36.40   | 34.43   | 39.00   | 54.13   | 43.31                 | 35.49                 | 63.34   | 32.46   | 35.12   | 34.72   |
| Score                  | 0.20   | 0.50   | 0.50   | 1.00   | 0.50   | 0.22   | -0.43   | 1.00    | 1.00    | 0.20    | -0.32   | 0.50    | 1.50    | -0.81   | 0.50    | 1.50    | 1.50    | -0.39   | -0.54   | 1.50                  | -0.35                 | 1.50    | -0.32   | 1.50    | 1.50    |
| Ion-type               | PR     | V      | a1     | b1-H2O | KQ     | LI     | H       | F       | RKQ     | a2      | y1      | a2      | y1      | b2      | y++3    | y2      | y2      |         |         | y4 <sup>+2</sup>      |                       | y4      | y5      | y6      |         |
| Delta ppm              | -18.9  | -5.2   | -3.2   | 3.7    | 9.8    | -6.1   |         | -7.0    | -18.1   | 18.3    |         | -9.5    | -28.4   |         |         |         |         |         |         | 5.6                   |                       | -3.8    |         | -27.4   | -5.0    |
|                        |        |        |        | 1.00   |        |        |         |         |         |         |         |         |         |         |         |         |         |         |         |                       |                       |         |         |         |         |
|                        |        |        |        | E      |        |        |         |         |         |         |         |         |         |         |         |         |         |         |         |                       |                       |         |         |         |         |
|                        |        |        |        | 16.8   |        |        |         |         |         |         |         |         |         |         |         |         |         |         |         |                       |                       |         |         |         |         |

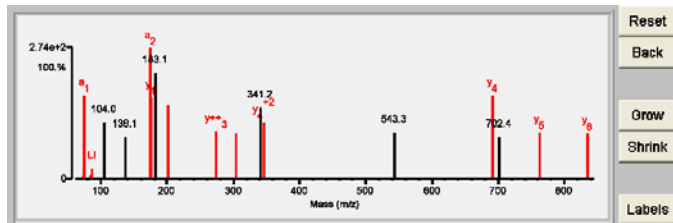



Result Summary

| Rank | Score | SPI (%) | BCS | # Unmatched Ions | Variable sites | Sequence         | MH <sup>+</sup> Calculated (Da) | MH <sup>+</sup> Error (Da) | MH <sup>+</sup> Error (ppm) | Protein MW/pl (Da) | Species | Accession # | Protein Name                                                                                       |
|------|-------|---------|-----|------------------|----------------|------------------|---------------------------------|----------------------------|-----------------------------|--------------------|---------|-------------|----------------------------------------------------------------------------------------------------|
| 1    | 17.64 | 86.7    | 8   | 4/25             | K80k           | (R)FAQIVQKGGQ(-) | 1075.5895                       | 114.0457                   | 2.3                         | 9343.6/5.02        | HUMAN   | Q9Y5J9      | Mitochondrial import inner membrane translocase subunit Tim8 B OS=Homo sapiens GN=TIMM8B PE=1 SV=1 |

Detailed Results

| Rank                                                                                                                                                                                                                                                                                                                                                                                                                                                                                                                                                                                                                                                                                                                                                                                                                                                                                                                                                                                                                                                                                                                                                                                                                                                                                                                                                                                                                                                                                                                                                                                                                                                                                                                                                                                                                                                                                                                                                                                                                                                                                                                                                                                                                                                                                                                                                                                                                                                                                                                        | Score  | SPI (%) | BCS     | # Unmatched Ions | Variable sites | Sequence                            | MH <sup>+</sup> Calculated (Da) | MH <sup>+</sup> Error (Da) | MH <sup>+</sup> Error (ppm) | Protein MW/pl (Da) | Species | Accession # | MS-Digest Index # | Protein Name                                                                                       |                    |         |         |         |                      |         |         |         |         |         |         |         |         |         |         |         |         |         |         |                      |         |         |         |         |         |         |                         |      |      |      |      |      |      |      |      |      |      |      |      |      |      |      |      |      |      |      |      |      |      |      |      |      |                       |      |      |      |      |       |       |       |       |       |       |       |       |        |       |       |       |       |       |       |       |       |       |       |       |       |       |      |      |      |      |      |      |      |      |      |      |      |       |      |      |       |       |      |      |       |      |      |      |      |      |      |          |   |    |    |    |        |    |    |    |    |    |    |    |     |    |     |  |    |     |  |      |    |        |    |    |    |           |      |  |     |       |       |      |       |       |       |       |      |  |      |       |  |  |      |      |  |      |       |      |      |      |      |
|-----------------------------------------------------------------------------------------------------------------------------------------------------------------------------------------------------------------------------------------------------------------------------------------------------------------------------------------------------------------------------------------------------------------------------------------------------------------------------------------------------------------------------------------------------------------------------------------------------------------------------------------------------------------------------------------------------------------------------------------------------------------------------------------------------------------------------------------------------------------------------------------------------------------------------------------------------------------------------------------------------------------------------------------------------------------------------------------------------------------------------------------------------------------------------------------------------------------------------------------------------------------------------------------------------------------------------------------------------------------------------------------------------------------------------------------------------------------------------------------------------------------------------------------------------------------------------------------------------------------------------------------------------------------------------------------------------------------------------------------------------------------------------------------------------------------------------------------------------------------------------------------------------------------------------------------------------------------------------------------------------------------------------------------------------------------------------------------------------------------------------------------------------------------------------------------------------------------------------------------------------------------------------------------------------------------------------------------------------------------------------------------------------------------------------------------------------------------------------------------------------------------------------|--------|---------|---------|------------------|----------------|-------------------------------------|---------------------------------|----------------------------|-----------------------------|--------------------|---------|-------------|-------------------|----------------------------------------------------------------------------------------------------|--------------------|---------|---------|---------|----------------------|---------|---------|---------|---------|---------|---------|---------|---------|---------|---------|---------|---------|---------|---------|----------------------|---------|---------|---------|---------|---------|---------|-------------------------|------|------|------|------|------|------|------|------|------|------|------|------|------|------|------|------|------|------|------|------|------|------|------|------|------|-----------------------|------|------|------|------|-------|-------|-------|-------|-------|-------|-------|-------|--------|-------|-------|-------|-------|-------|-------|-------|-------|-------|-------|-------|-------|-------|------|------|------|------|------|------|------|------|------|------|------|-------|------|------|-------|-------|------|------|-------|------|------|------|------|------|------|----------|---|----|----|----|--------|----|----|----|----|----|----|----|-----|----|-----|--|----|-----|--|------|----|--------|----|----|----|-----------|------|--|-----|-------|-------|------|-------|-------|-------|-------|------|--|------|-------|--|--|------|------|--|------|-------|------|------|------|------|
| 1                                                                                                                                                                                                                                                                                                                                                                                                                                                                                                                                                                                                                                                                                                                                                                                                                                                                                                                                                                                                                                                                                                                                                                                                                                                                                                                                                                                                                                                                                                                                                                                                                                                                                                                                                                                                                                                                                                                                                                                                                                                                                                                                                                                                                                                                                                                                                                                                                                                                                                                           | 17.64  | 86.7    | 8       | 4/25             | K80k           | (R) F A Q I V Q / k / G / G / Q (-) | 1075.5895                       | 114.0457                   | 2.3                         | 9343.6/5.02        | HUMAN   | Q9Y5J9      | 783559            | Mitochondrial import inner membrane translocase subunit Tim8 B OS=Homo sapiens GN=TIMM8B PE=1 SV=1 |                    |         |         |         |                      |         |         |         |         |         |         |         |         |         |         |         |         |         |         |                      |         |         |         |         |         |         |                         |      |      |      |      |      |      |      |      |      |      |      |      |      |      |      |      |      |      |      |      |      |      |      |      |      |                       |      |      |      |      |       |       |       |       |       |       |       |       |        |       |       |       |       |       |       |       |       |       |       |       |       |       |      |      |      |      |      |      |      |      |      |      |      |       |      |      |       |       |      |      |       |      |      |      |      |      |      |          |   |    |    |    |        |    |    |    |    |    |    |    |     |    |     |  |    |     |  |      |    |        |    |    |    |           |      |  |     |       |       |      |       |       |       |       |      |  |      |       |  |  |      |      |  |      |       |      |      |      |      |
| <table border="1"> <thead> <tr> <th>Fragment-ion (m/z)</th> <th>72.082</th> <th>84.081</th> <th>101.072</th> <th>120.079</th> <th>130.045</th> <th>147.076</th> <th>191.116</th> <th>200.099</th> <th>204.094</th> <th>219.112</th> <th>261.117</th> <th>324.197</th> <th>347.170</th> <th>357.179</th> <th>410.223</th> <th>430.231</th> <th>460.266</th> <th>470.278</th> <th>477.265<sup>2</sup></th> <th>485.244</th> <th>503.251</th> <th>614.287</th> <th>631.312</th> <th>730.384</th> <th>843.477</th> </tr> </thead> <tbody> <tr> <td>Frac. Inten. (% of TIC)</td> <td>0.11</td> <td>0.47</td> <td>0.51</td> <td>0.42</td> <td>2.76</td> <td>7.06</td> <td>6.42</td> <td>2.62</td> <td>5.07</td> <td>2.88</td> <td>3.07</td> <td>2.57</td> <td>9.77</td> <td>5.18</td> <td>3.90</td> <td>2.99</td> <td>3.04</td> <td>3.51</td> <td>3.83</td> <td>3.34</td> <td>8.07</td> <td>6.52</td> <td>3.44</td> <td>7.29</td> <td>5.18</td> </tr> <tr> <td>Rel. Inten. (% of BP)</td> <td>1.17</td> <td>4.80</td> <td>5.21</td> <td>4.25</td> <td>28.26</td> <td>72.21</td> <td>65.71</td> <td>26.78</td> <td>51.84</td> <td>29.45</td> <td>31.42</td> <td>26.30</td> <td>100.00</td> <td>53.01</td> <td>39.95</td> <td>30.60</td> <td>31.10</td> <td>35.88</td> <td>39.18</td> <td>34.23</td> <td>82.56</td> <td>66.68</td> <td>35.25</td> <td>74.58</td> <td>53.00</td> </tr> <tr> <td>Score</td> <td>0.50</td> <td>0.50</td> <td>1.00</td> <td>1.00</td> <td>0.50</td> <td>1.50</td> <td>0.50</td> <td>0.75</td> <td>1.50</td> <td>0.50</td> <td>1.50</td> <td>-0.26</td> <td>0.50</td> <td>0.75</td> <td>-0.40</td> <td>-0.31</td> <td>0.50</td> <td>0.75</td> <td>-0.39</td> <td>0.75</td> <td>1.50</td> <td>1.50</td> <td>1.50</td> <td>1.50</td> <td>1.50</td> </tr> <tr> <td>Ion-type</td> <td>V</td> <td>QK</td> <td>QK</td> <td>a1</td> <td>y1-NH3</td> <td>y1</td> <td>a2</td> <td>QK</td> <td>y2</td> <td>b2</td> <td>y3</td> <td>b3</td> <td>kGG</td> <td>b3</td> <td>kGG</td> <td></td> <td>b4</td> <td>VQK</td> <td></td> <td>QkGG</td> <td>y4</td> <td>y5-NH3</td> <td>y5</td> <td>y6</td> <td>y7</td> </tr> <tr> <td>Delta ppm</td> <td>19.8</td> <td></td> <td>9.5</td> <td>-26.4</td> <td>-38.2</td> <td>-5.6</td> <td>-14.1</td> <td>-23.8</td> <td>-21.0</td> <td>-11.0</td> <td>-8.2</td> <td></td> <td>-7.4</td> <td>-27.4</td> <td></td> <td></td> <td>19.7</td> <td>10.9</td> <td></td> <td>-7.4</td> <td>-12.8</td> <td>-3.5</td> <td>-6.4</td> <td>-0.6</td> <td>10.6</td> </tr> </tbody> </table> |        |         |         |                  |                |                                     |                                 |                            |                             |                    |         |             |                   |                                                                                                    | Fragment-ion (m/z) | 72.082  | 84.081  | 101.072 | 120.079              | 130.045 | 147.076 | 191.116 | 200.099 | 204.094 | 219.112 | 261.117 | 324.197 | 347.170 | 357.179 | 410.223 | 430.231 | 460.266 | 470.278 | 477.265 <sup>2</sup> | 485.244 | 503.251 | 614.287 | 631.312 | 730.384 | 843.477 | Frac. Inten. (% of TIC) | 0.11 | 0.47 | 0.51 | 0.42 | 2.76 | 7.06 | 6.42 | 2.62 | 5.07 | 2.88 | 3.07 | 2.57 | 9.77 | 5.18 | 3.90 | 2.99 | 3.04 | 3.51 | 3.83 | 3.34 | 8.07 | 6.52 | 3.44 | 7.29 | 5.18 | Rel. Inten. (% of BP) | 1.17 | 4.80 | 5.21 | 4.25 | 28.26 | 72.21 | 65.71 | 26.78 | 51.84 | 29.45 | 31.42 | 26.30 | 100.00 | 53.01 | 39.95 | 30.60 | 31.10 | 35.88 | 39.18 | 34.23 | 82.56 | 66.68 | 35.25 | 74.58 | 53.00 | Score | 0.50 | 0.50 | 1.00 | 1.00 | 0.50 | 1.50 | 0.50 | 0.75 | 1.50 | 0.50 | 1.50 | -0.26 | 0.50 | 0.75 | -0.40 | -0.31 | 0.50 | 0.75 | -0.39 | 0.75 | 1.50 | 1.50 | 1.50 | 1.50 | 1.50 | Ion-type | V | QK | QK | a1 | y1-NH3 | y1 | a2 | QK | y2 | b2 | y3 | b3 | kGG | b3 | kGG |  | b4 | VQK |  | QkGG | y4 | y5-NH3 | y5 | y6 | y7 | Delta ppm | 19.8 |  | 9.5 | -26.4 | -38.2 | -5.6 | -14.1 | -23.8 | -21.0 | -11.0 | -8.2 |  | -7.4 | -27.4 |  |  | 19.7 | 10.9 |  | -7.4 | -12.8 | -3.5 | -6.4 | -0.6 | 10.6 |
| Fragment-ion (m/z)                                                                                                                                                                                                                                                                                                                                                                                                                                                                                                                                                                                                                                                                                                                                                                                                                                                                                                                                                                                                                                                                                                                                                                                                                                                                                                                                                                                                                                                                                                                                                                                                                                                                                                                                                                                                                                                                                                                                                                                                                                                                                                                                                                                                                                                                                                                                                                                                                                                                                                          | 72.082 | 84.081  | 101.072 | 120.079          | 130.045        | 147.076                             | 191.116                         | 200.099                    | 204.094                     | 219.112            | 261.117 | 324.197     | 347.170           | 357.179                                                                                            | 410.223            | 430.231 | 460.266 | 470.278 | 477.265 <sup>2</sup> | 485.244 | 503.251 | 614.287 | 631.312 | 730.384 | 843.477 |         |         |         |         |         |         |         |         |                      |         |         |         |         |         |         |                         |      |      |      |      |      |      |      |      |      |      |      |      |      |      |      |      |      |      |      |      |      |      |      |      |      |                       |      |      |      |      |       |       |       |       |       |       |       |       |        |       |       |       |       |       |       |       |       |       |       |       |       |       |      |      |      |      |      |      |      |      |      |      |      |       |      |      |       |       |      |      |       |      |      |      |      |      |      |          |   |    |    |    |        |    |    |    |    |    |    |    |     |    |     |  |    |     |  |      |    |        |    |    |    |           |      |  |     |       |       |      |       |       |       |       |      |  |      |       |  |  |      |      |  |      |       |      |      |      |      |
| Frac. Inten. (% of TIC)                                                                                                                                                                                                                                                                                                                                                                                                                                                                                                                                                                                                                                                                                                                                                                                                                                                                                                                                                                                                                                                                                                                                                                                                                                                                                                                                                                                                                                                                                                                                                                                                                                                                                                                                                                                                                                                                                                                                                                                                                                                                                                                                                                                                                                                                                                                                                                                                                                                                                                     | 0.11   | 0.47    | 0.51    | 0.42             | 2.76           | 7.06                                | 6.42                            | 2.62                       | 5.07                        | 2.88               | 3.07    | 2.57        | 9.77              | 5.18                                                                                               | 3.90               | 2.99    | 3.04    | 3.51    | 3.83                 | 3.34    | 8.07    | 6.52    | 3.44    | 7.29    | 5.18    |         |         |         |         |         |         |         |         |                      |         |         |         |         |         |         |                         |      |      |      |      |      |      |      |      |      |      |      |      |      |      |      |      |      |      |      |      |      |      |      |      |      |                       |      |      |      |      |       |       |       |       |       |       |       |       |        |       |       |       |       |       |       |       |       |       |       |       |       |       |      |      |      |      |      |      |      |      |      |      |      |       |      |      |       |       |      |      |       |      |      |      |      |      |      |          |   |    |    |    |        |    |    |    |    |    |    |    |     |    |     |  |    |     |  |      |    |        |    |    |    |           |      |  |     |       |       |      |       |       |       |       |      |  |      |       |  |  |      |      |  |      |       |      |      |      |      |
| Rel. Inten. (% of BP)                                                                                                                                                                                                                                                                                                                                                                                                                                                                                                                                                                                                                                                                                                                                                                                                                                                                                                                                                                                                                                                                                                                                                                                                                                                                                                                                                                                                                                                                                                                                                                                                                                                                                                                                                                                                                                                                                                                                                                                                                                                                                                                                                                                                                                                                                                                                                                                                                                                                                                       | 1.17   | 4.80    | 5.21    | 4.25             | 28.26          | 72.21                               | 65.71                           | 26.78                      | 51.84                       | 29.45              | 31.42   | 26.30       | 100.00            | 53.01                                                                                              | 39.95              | 30.60   | 31.10   | 35.88   | 39.18                | 34.23   | 82.56   | 66.68   | 35.25   | 74.58   | 53.00   |         |         |         |         |         |         |         |         |                      |         |         |         |         |         |         |                         |      |      |      |      |      |      |      |      |      |      |      |      |      |      |      |      |      |      |      |      |      |      |      |      |      |                       |      |      |      |      |       |       |       |       |       |       |       |       |        |       |       |       |       |       |       |       |       |       |       |       |       |       |      |      |      |      |      |      |      |      |      |      |      |       |      |      |       |       |      |      |       |      |      |      |      |      |      |          |   |    |    |    |        |    |    |    |    |    |    |    |     |    |     |  |    |     |  |      |    |        |    |    |    |           |      |  |     |       |       |      |       |       |       |       |      |  |      |       |  |  |      |      |  |      |       |      |      |      |      |
| Score                                                                                                                                                                                                                                                                                                                                                                                                                                                                                                                                                                                                                                                                                                                                                                                                                                                                                                                                                                                                                                                                                                                                                                                                                                                                                                                                                                                                                                                                                                                                                                                                                                                                                                                                                                                                                                                                                                                                                                                                                                                                                                                                                                                                                                                                                                                                                                                                                                                                                                                       | 0.50   | 0.50    | 1.00    | 1.00             | 0.50           | 1.50                                | 0.50                            | 0.75                       | 1.50                        | 0.50               | 1.50    | -0.26       | 0.50              | 0.75                                                                                               | -0.40              | -0.31   | 0.50    | 0.75    | -0.39                | 0.75    | 1.50    | 1.50    | 1.50    | 1.50    | 1.50    |         |         |         |         |         |         |         |         |                      |         |         |         |         |         |         |                         |      |      |      |      |      |      |      |      |      |      |      |      |      |      |      |      |      |      |      |      |      |      |      |      |      |                       |      |      |      |      |       |       |       |       |       |       |       |       |        |       |       |       |       |       |       |       |       |       |       |       |       |       |      |      |      |      |      |      |      |      |      |      |      |       |      |      |       |       |      |      |       |      |      |      |      |      |      |          |   |    |    |    |        |    |    |    |    |    |    |    |     |    |     |  |    |     |  |      |    |        |    |    |    |           |      |  |     |       |       |      |       |       |       |       |      |  |      |       |  |  |      |      |  |      |       |      |      |      |      |
| Ion-type                                                                                                                                                                                                                                                                                                                                                                                                                                                                                                                                                                                                                                                                                                                                                                                                                                                                                                                                                                                                                                                                                                                                                                                                                                                                                                                                                                                                                                                                                                                                                                                                                                                                                                                                                                                                                                                                                                                                                                                                                                                                                                                                                                                                                                                                                                                                                                                                                                                                                                                    | V      | QK      | QK      | a1               | y1-NH3         | y1                                  | a2                              | QK                         | y2                          | b2                 | y3      | b3          | kGG               | b3                                                                                                 | kGG                |         | b4      | VQK     |                      | QkGG    | y4      | y5-NH3  | y5      | y6      | y7      |         |         |         |         |         |         |         |         |                      |         |         |         |         |         |         |                         |      |      |      |      |      |      |      |      |      |      |      |      |      |      |      |      |      |      |      |      |      |      |      |      |      |                       |      |      |      |      |       |       |       |       |       |       |       |       |        |       |       |       |       |       |       |       |       |       |       |       |       |       |      |      |      |      |      |      |      |      |      |      |      |       |      |      |       |       |      |      |       |      |      |      |      |      |      |          |   |    |    |    |        |    |    |    |    |    |    |    |     |    |     |  |    |     |  |      |    |        |    |    |    |           |      |  |     |       |       |      |       |       |       |       |      |  |      |       |  |  |      |      |  |      |       |      |      |      |      |
| Delta ppm                                                                                                                                                                                                                                                                                                                                                                                                                                                                                                                                                                                                                                                                                                                                                                                                                                                                                                                                                                                                                                                                                                                                                                                                                                                                                                                                                                                                                                                                                                                                                                                                                                                                                                                                                                                                                                                                                                                                                                                                                                                                                                                                                                                                                                                                                                                                                                                                                                                                                                                   | 19.8   |         | 9.5     | -26.4            | -38.2          | -5.6                                | -14.1                           | -23.8                      | -21.0                       | -11.0              | -8.2    |             | -7.4              | -27.4                                                                                              |                    |         | 19.7    | 10.9    |                      | -7.4    | -12.8   | -3.5    | -6.4    | -0.6    | 10.6    |         |         |         |         |         |         |         |         |                      |         |         |         |         |         |         |                         |      |      |      |      |      |      |      |      |      |      |      |      |      |      |      |      |      |      |      |      |      |      |      |      |      |                       |      |      |      |      |       |       |       |       |       |       |       |       |        |       |       |       |       |       |       |       |       |       |       |       |       |       |      |      |      |      |      |      |      |      |      |      |      |       |      |      |       |       |      |      |       |      |      |      |      |      |      |          |   |    |    |    |        |    |    |    |    |    |    |    |     |    |     |  |    |     |  |      |    |        |    |    |    |           |      |  |     |       |       |      |       |       |       |       |      |  |      |       |  |  |      |      |  |      |       |      |      |      |      |

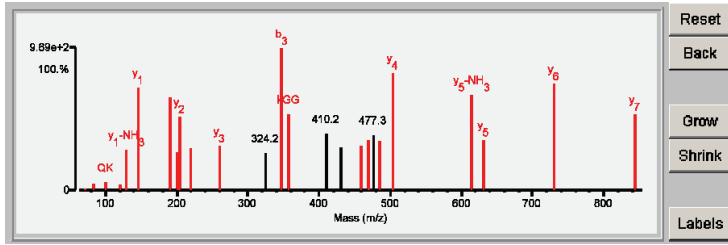

Reset

Back

Grow

Shrink

Labels

Result Summary

| Rank | Score | SPI (%) | BCS | # Unmatched Ions | Variable sites | Sequence                                 | MH <sup>+</sup> Calculated (Da) | MH <sup>+</sup> Error (Da) | MH <sup>+</sup> Error (ppm) | Protein MW/pl (Da) | Species | Accession # | Protein Name                            |
|------|-------|---------|-----|------------------|----------------|------------------------------------------|---------------------------------|----------------------------|-----------------------------|--------------------|---------|-------------|-----------------------------------------|
| 1    | 18.66 | 77.0    | 9   | 6/25             | K209K          | (K)A Q D L E M Y G V N Y F S I K N K (K) | 2133.0685                       | 114.0583                   | 6.9                         | 67820.4/6.07       | HUMAN   | P26038      | Moesin OS=Homo sapiens GN=MSN PE=1 SV=3 |
| 2    | 17.04 | 74.3    | 8   | 7/25             | K211K          | (K)A Q D L E M Y G V N Y F S I K N K (K) | 2133.0685                       | 114.0583                   | 6.9                         | 67820.4/6.07       | HUMAN   | P26038      | Moesin OS=Homo sapiens GN=MSN PE=1 SV=3 |

Detailed Results

| Rank                                                                                                                                                                                                                                                                                                                                                                                                                                                                                                                                                                                                                                                                                                                                                                                                                                                                                                                                                                                                                                                                                                                                                                                                                                                                                                                                                                                                                                                                                                                                                                                                                                                                                                                                                                                                                                                                                                                                                                                                                                                                                                                                                                                                                                                                                                                                                                                                                                                                                                                  | Score  | SPI (%) | BCS    | # Unmatched Ions | Variable sites | Sequence                                                      | MH <sup>+</sup> Calculated (Da) | MH <sup>+</sup> Error (Da) | MH <sup>+</sup> Error (ppm) | Protein MW/pl (Da) | Species | Accession # | MS-Digest Index # | Protein Name                            |                    |         |         |         |         |         |                    |          |                        |          |          |         |         |         |         |         |         |         |         |         |         |         |          |                        |          |          |                         |      |      |      |       |      |      |      |      |      |      |      |      |      |      |      |      |      |      |      |       |      |      |      |      |      |                       |      |      |       |        |      |      |      |       |       |       |       |       |       |       |       |       |       |       |       |       |       |       |       |       |       |       |      |      |       |      |      |      |      |      |      |      |      |      |       |      |      |       |      |       |      |      |      |       |       |      |      |          |   |    |  |    |   |     |   |    |    |    |    |    |  |    |                   |  |        |  |    |    |                    |  |    |     |           |       |       |  |       |       |       |     |      |       |       |       |       |  |      |      |  |      |  |      |       |      |  |      |      |
|-----------------------------------------------------------------------------------------------------------------------------------------------------------------------------------------------------------------------------------------------------------------------------------------------------------------------------------------------------------------------------------------------------------------------------------------------------------------------------------------------------------------------------------------------------------------------------------------------------------------------------------------------------------------------------------------------------------------------------------------------------------------------------------------------------------------------------------------------------------------------------------------------------------------------------------------------------------------------------------------------------------------------------------------------------------------------------------------------------------------------------------------------------------------------------------------------------------------------------------------------------------------------------------------------------------------------------------------------------------------------------------------------------------------------------------------------------------------------------------------------------------------------------------------------------------------------------------------------------------------------------------------------------------------------------------------------------------------------------------------------------------------------------------------------------------------------------------------------------------------------------------------------------------------------------------------------------------------------------------------------------------------------------------------------------------------------------------------------------------------------------------------------------------------------------------------------------------------------------------------------------------------------------------------------------------------------------------------------------------------------------------------------------------------------------------------------------------------------------------------------------------------------|--------|---------|--------|------------------|----------------|---------------------------------------------------------------|---------------------------------|----------------------------|-----------------------------|--------------------|---------|-------------|-------------------|-----------------------------------------|--------------------|---------|---------|---------|---------|---------|--------------------|----------|------------------------|----------|----------|---------|---------|---------|---------|---------|---------|---------|---------|---------|---------|---------|----------|------------------------|----------|----------|-------------------------|------|------|------|-------|------|------|------|------|------|------|------|------|------|------|------|------|------|------|------|-------|------|------|------|------|------|-----------------------|------|------|-------|--------|------|------|------|-------|-------|-------|-------|-------|-------|-------|-------|-------|-------|-------|-------|-------|-------|-------|-------|-------|-------|-------|------|------|-------|------|------|------|------|------|------|------|------|------|-------|------|------|-------|------|-------|------|------|------|-------|-------|------|------|----------|---|----|--|----|---|-----|---|----|----|----|----|----|--|----|-------------------|--|--------|--|----|----|--------------------|--|----|-----|-----------|-------|-------|--|-------|-------|-------|-----|------|-------|-------|-------|-------|--|------|------|--|------|--|------|-------|------|--|------|------|
| 1                                                                                                                                                                                                                                                                                                                                                                                                                                                                                                                                                                                                                                                                                                                                                                                                                                                                                                                                                                                                                                                                                                                                                                                                                                                                                                                                                                                                                                                                                                                                                                                                                                                                                                                                                                                                                                                                                                                                                                                                                                                                                                                                                                                                                                                                                                                                                                                                                                                                                                                     | 18.66  | 77.0    | 9      | 6/25             | K209K          | (K) I A \ Q / D L E M Y / G V / N Y / F / S I / k / n / K (K) | 2133.0685                       | 114.0583                   | 6.9                         | 67820.4/6.07       | HUMAN   | P26038      | 405757            | Moesin OS=Homo sapiens GN=MSN PE=1 SV=3 |                    |         |         |         |         |         |                    |          |                        |          |          |         |         |         |         |         |         |         |         |         |         |         |          |                        |          |          |                         |      |      |      |       |      |      |      |      |      |      |      |      |      |      |      |      |      |      |      |       |      |      |      |      |      |                       |      |      |       |        |      |      |      |       |       |       |       |       |       |       |       |       |       |       |       |       |       |       |       |       |       |       |      |      |       |      |      |      |      |      |      |      |      |      |       |      |      |       |      |       |      |      |      |       |       |      |      |          |   |    |  |    |   |     |   |    |    |    |    |    |  |    |                   |  |        |  |    |    |                    |  |    |     |           |       |       |  |       |       |       |     |      |       |       |       |       |  |      |      |  |      |  |      |       |      |  |      |      |
| <table border="1"> <thead> <tr> <th>Fragment-ion (m/z)</th> <th>72.078</th> <th>84.078</th> <th>85.047</th> <th>86.094</th> <th>120.078</th> <th>129.099</th> <th>136.077</th> <th>147.117</th> <th>157.132</th> <th>185.124</th> <th>244.089</th> <th>261.153</th> <th>372.229</th> <th>503.302</th> <th>564.311</th> <th>683.027</th> <th>693.336</th> <th>695.624</th> <th>703.405</th> <th>850.470</th> <th>967.967</th> <th>1014.542</th> <th>1068.053<sup>+2</sup></th> <th>1127.582</th> <th>1283.666</th> </tr> </thead> <tbody> <tr> <td>Frac. Inten. (% of TIC)</td> <td>0.14</td> <td>0.11</td> <td>3.11</td> <td>22.08</td> <td>0.12</td> <td>0.08</td> <td>0.34</td> <td>2.65</td> <td>3.50</td> <td>4.30</td> <td>3.42</td> <td>3.00</td> <td>3.17</td> <td>5.19</td> <td>2.74</td> <td>2.80</td> <td>3.06</td> <td>2.70</td> <td>6.60</td> <td>10.06</td> <td>2.39</td> <td>3.58</td> <td>7.67</td> <td>2.97</td> <td>4.24</td> </tr> <tr> <td>Rel. Inten. (% of BP)</td> <td>0.63</td> <td>0.49</td> <td>14.08</td> <td>100.00</td> <td>0.52</td> <td>0.38</td> <td>1.53</td> <td>11.98</td> <td>15.83</td> <td>19.47</td> <td>15.49</td> <td>13.58</td> <td>14.34</td> <td>23.52</td> <td>12.42</td> <td>12.68</td> <td>13.85</td> <td>12.22</td> <td>29.88</td> <td>45.55</td> <td>10.80</td> <td>16.23</td> <td>34.75</td> <td>13.47</td> <td>19.22</td> </tr> <tr> <td>Score</td> <td>0.50</td> <td>0.50</td> <td>-0.14</td> <td>0.50</td> <td>1.00</td> <td>0.20</td> <td>1.00</td> <td>1.50</td> <td>0.50</td> <td>0.50</td> <td>0.75</td> <td>1.50</td> <td>-0.14</td> <td>1.50</td> <td>1.50</td> <td>-0.13</td> <td>0.75</td> <td>-0.12</td> <td>1.50</td> <td>1.50</td> <td>1.50</td> <td>-0.16</td> <td>-0.35</td> <td>1.50</td> <td>1.50</td> </tr> <tr> <td>Ion-type</td> <td>V</td> <td>KQ</td> <td></td> <td>a1</td> <td>F</td> <td>RKQ</td> <td>Y</td> <td>y1</td> <td>a2</td> <td>b2</td> <td>QD</td> <td>y2</td> <td></td> <td>y3</td> <td>y<sup>++</sup>8</td> <td></td> <td>LEMVGV</td> <td></td> <td>y5</td> <td>y6</td> <td>y<sup>++</sup>15</td> <td></td> <td>y8</td> <td>y10</td> </tr> <tr> <td>Delta ppm</td> <td>-35.7</td> <td>-30.6</td> <td></td> <td>-36.3</td> <td>-27.3</td> <td>-22.8</td> <td>6.0</td> <td>28.5</td> <td>-14.9</td> <td>-31.1</td> <td>-18.4</td> <td>-11.6</td> <td></td> <td>15.9</td> <td>26.0</td> <td></td> <td>10.8</td> <td></td> <td>-6.3</td> <td>-10.1</td> <td>-2.0</td> <td></td> <td>-1.8</td> <td>-6.4</td> </tr> </tbody> </table> |        |         |        |                  |                |                                                               |                                 |                            |                             |                    |         |             |                   |                                         | Fragment-ion (m/z) | 72.078  | 84.078  | 85.047  | 86.094  | 120.078 | 129.099            | 136.077  | 147.117                | 157.132  | 185.124  | 244.089 | 261.153 | 372.229 | 503.302 | 564.311 | 683.027 | 693.336 | 695.624 | 703.405 | 850.470 | 967.967 | 1014.542 | 1068.053 <sup>+2</sup> | 1127.582 | 1283.666 | Frac. Inten. (% of TIC) | 0.14 | 0.11 | 3.11 | 22.08 | 0.12 | 0.08 | 0.34 | 2.65 | 3.50 | 4.30 | 3.42 | 3.00 | 3.17 | 5.19 | 2.74 | 2.80 | 3.06 | 2.70 | 6.60 | 10.06 | 2.39 | 3.58 | 7.67 | 2.97 | 4.24 | Rel. Inten. (% of BP) | 0.63 | 0.49 | 14.08 | 100.00 | 0.52 | 0.38 | 1.53 | 11.98 | 15.83 | 19.47 | 15.49 | 13.58 | 14.34 | 23.52 | 12.42 | 12.68 | 13.85 | 12.22 | 29.88 | 45.55 | 10.80 | 16.23 | 34.75 | 13.47 | 19.22 | Score | 0.50 | 0.50 | -0.14 | 0.50 | 1.00 | 0.20 | 1.00 | 1.50 | 0.50 | 0.50 | 0.75 | 1.50 | -0.14 | 1.50 | 1.50 | -0.13 | 0.75 | -0.12 | 1.50 | 1.50 | 1.50 | -0.16 | -0.35 | 1.50 | 1.50 | Ion-type | V | KQ |  | a1 | F | RKQ | Y | y1 | a2 | b2 | QD | y2 |  | y3 | y <sup>++</sup> 8 |  | LEMVGV |  | y5 | y6 | y <sup>++</sup> 15 |  | y8 | y10 | Delta ppm | -35.7 | -30.6 |  | -36.3 | -27.3 | -22.8 | 6.0 | 28.5 | -14.9 | -31.1 | -18.4 | -11.6 |  | 15.9 | 26.0 |  | 10.8 |  | -6.3 | -10.1 | -2.0 |  | -1.8 | -6.4 |
| Fragment-ion (m/z)                                                                                                                                                                                                                                                                                                                                                                                                                                                                                                                                                                                                                                                                                                                                                                                                                                                                                                                                                                                                                                                                                                                                                                                                                                                                                                                                                                                                                                                                                                                                                                                                                                                                                                                                                                                                                                                                                                                                                                                                                                                                                                                                                                                                                                                                                                                                                                                                                                                                                                    | 72.078 | 84.078  | 85.047 | 86.094           | 120.078        | 129.099                                                       | 136.077                         | 147.117                    | 157.132                     | 185.124            | 244.089 | 261.153     | 372.229           | 503.302                                 | 564.311            | 683.027 | 693.336 | 695.624 | 703.405 | 850.470 | 967.967            | 1014.542 | 1068.053 <sup>+2</sup> | 1127.582 | 1283.666 |         |         |         |         |         |         |         |         |         |         |         |          |                        |          |          |                         |      |      |      |       |      |      |      |      |      |      |      |      |      |      |      |      |      |      |      |       |      |      |      |      |      |                       |      |      |       |        |      |      |      |       |       |       |       |       |       |       |       |       |       |       |       |       |       |       |       |       |       |       |      |      |       |      |      |      |      |      |      |      |      |      |       |      |      |       |      |       |      |      |      |       |       |      |      |          |   |    |  |    |   |     |   |    |    |    |    |    |  |    |                   |  |        |  |    |    |                    |  |    |     |           |       |       |  |       |       |       |     |      |       |       |       |       |  |      |      |  |      |  |      |       |      |  |      |      |
| Frac. Inten. (% of TIC)                                                                                                                                                                                                                                                                                                                                                                                                                                                                                                                                                                                                                                                                                                                                                                                                                                                                                                                                                                                                                                                                                                                                                                                                                                                                                                                                                                                                                                                                                                                                                                                                                                                                                                                                                                                                                                                                                                                                                                                                                                                                                                                                                                                                                                                                                                                                                                                                                                                                                               | 0.14   | 0.11    | 3.11   | 22.08            | 0.12           | 0.08                                                          | 0.34                            | 2.65                       | 3.50                        | 4.30               | 3.42    | 3.00        | 3.17              | 5.19                                    | 2.74               | 2.80    | 3.06    | 2.70    | 6.60    | 10.06   | 2.39               | 3.58     | 7.67                   | 2.97     | 4.24     |         |         |         |         |         |         |         |         |         |         |         |          |                        |          |          |                         |      |      |      |       |      |      |      |      |      |      |      |      |      |      |      |      |      |      |      |       |      |      |      |      |      |                       |      |      |       |        |      |      |      |       |       |       |       |       |       |       |       |       |       |       |       |       |       |       |       |       |       |       |      |      |       |      |      |      |      |      |      |      |      |      |       |      |      |       |      |       |      |      |      |       |       |      |      |          |   |    |  |    |   |     |   |    |    |    |    |    |  |    |                   |  |        |  |    |    |                    |  |    |     |           |       |       |  |       |       |       |     |      |       |       |       |       |  |      |      |  |      |  |      |       |      |  |      |      |
| Rel. Inten. (% of BP)                                                                                                                                                                                                                                                                                                                                                                                                                                                                                                                                                                                                                                                                                                                                                                                                                                                                                                                                                                                                                                                                                                                                                                                                                                                                                                                                                                                                                                                                                                                                                                                                                                                                                                                                                                                                                                                                                                                                                                                                                                                                                                                                                                                                                                                                                                                                                                                                                                                                                                 | 0.63   | 0.49    | 14.08  | 100.00           | 0.52           | 0.38                                                          | 1.53                            | 11.98                      | 15.83                       | 19.47              | 15.49   | 13.58       | 14.34             | 23.52                                   | 12.42              | 12.68   | 13.85   | 12.22   | 29.88   | 45.55   | 10.80              | 16.23    | 34.75                  | 13.47    | 19.22    |         |         |         |         |         |         |         |         |         |         |         |          |                        |          |          |                         |      |      |      |       |      |      |      |      |      |      |      |      |      |      |      |      |      |      |      |       |      |      |      |      |      |                       |      |      |       |        |      |      |      |       |       |       |       |       |       |       |       |       |       |       |       |       |       |       |       |       |       |       |      |      |       |      |      |      |      |      |      |      |      |      |       |      |      |       |      |       |      |      |      |       |       |      |      |          |   |    |  |    |   |     |   |    |    |    |    |    |  |    |                   |  |        |  |    |    |                    |  |    |     |           |       |       |  |       |       |       |     |      |       |       |       |       |  |      |      |  |      |  |      |       |      |  |      |      |
| Score                                                                                                                                                                                                                                                                                                                                                                                                                                                                                                                                                                                                                                                                                                                                                                                                                                                                                                                                                                                                                                                                                                                                                                                                                                                                                                                                                                                                                                                                                                                                                                                                                                                                                                                                                                                                                                                                                                                                                                                                                                                                                                                                                                                                                                                                                                                                                                                                                                                                                                                 | 0.50   | 0.50    | -0.14  | 0.50             | 1.00           | 0.20                                                          | 1.00                            | 1.50                       | 0.50                        | 0.50               | 0.75    | 1.50        | -0.14             | 1.50                                    | 1.50               | -0.13   | 0.75    | -0.12   | 1.50    | 1.50    | 1.50               | -0.16    | -0.35                  | 1.50     | 1.50     |         |         |         |         |         |         |         |         |         |         |         |          |                        |          |          |                         |      |      |      |       |      |      |      |      |      |      |      |      |      |      |      |      |      |      |      |       |      |      |      |      |      |                       |      |      |       |        |      |      |      |       |       |       |       |       |       |       |       |       |       |       |       |       |       |       |       |       |       |       |      |      |       |      |      |      |      |      |      |      |      |      |       |      |      |       |      |       |      |      |      |       |       |      |      |          |   |    |  |    |   |     |   |    |    |    |    |    |  |    |                   |  |        |  |    |    |                    |  |    |     |           |       |       |  |       |       |       |     |      |       |       |       |       |  |      |      |  |      |  |      |       |      |  |      |      |
| Ion-type                                                                                                                                                                                                                                                                                                                                                                                                                                                                                                                                                                                                                                                                                                                                                                                                                                                                                                                                                                                                                                                                                                                                                                                                                                                                                                                                                                                                                                                                                                                                                                                                                                                                                                                                                                                                                                                                                                                                                                                                                                                                                                                                                                                                                                                                                                                                                                                                                                                                                                              | V      | KQ      |        | a1               | F              | RKQ                                                           | Y                               | y1                         | a2                          | b2                 | QD      | y2          |                   | y3                                      | y <sup>++</sup> 8  |         | LEMVGV  |         | y5      | y6      | y <sup>++</sup> 15 |          | y8                     | y10      |          |         |         |         |         |         |         |         |         |         |         |         |          |                        |          |          |                         |      |      |      |       |      |      |      |      |      |      |      |      |      |      |      |      |      |      |      |       |      |      |      |      |      |                       |      |      |       |        |      |      |      |       |       |       |       |       |       |       |       |       |       |       |       |       |       |       |       |       |       |       |      |      |       |      |      |      |      |      |      |      |      |      |       |      |      |       |      |       |      |      |      |       |       |      |      |          |   |    |  |    |   |     |   |    |    |    |    |    |  |    |                   |  |        |  |    |    |                    |  |    |     |           |       |       |  |       |       |       |     |      |       |       |       |       |  |      |      |  |      |  |      |       |      |  |      |      |
| Delta ppm                                                                                                                                                                                                                                                                                                                                                                                                                                                                                                                                                                                                                                                                                                                                                                                                                                                                                                                                                                                                                                                                                                                                                                                                                                                                                                                                                                                                                                                                                                                                                                                                                                                                                                                                                                                                                                                                                                                                                                                                                                                                                                                                                                                                                                                                                                                                                                                                                                                                                                             | -35.7  | -30.6   |        | -36.3            | -27.3          | -22.8                                                         | 6.0                             | 28.5                       | -14.9                       | -31.1              | -18.4   | -11.6       |                   | 15.9                                    | 26.0               |         | 10.8    |         | -6.3    | -10.1   | -2.0               |          | -1.8                   | -6.4     |          |         |         |         |         |         |         |         |         |         |         |         |          |                        |          |          |                         |      |      |      |       |      |      |      |      |      |      |      |      |      |      |      |      |      |      |      |       |      |      |      |      |      |                       |      |      |       |        |      |      |      |       |       |       |       |       |       |       |       |       |       |       |       |       |       |       |       |       |       |       |      |      |       |      |      |      |      |      |      |      |      |      |       |      |      |       |      |       |      |      |      |       |       |      |      |          |   |    |  |    |   |     |   |    |    |    |    |    |  |    |                   |  |        |  |    |    |                    |  |    |     |           |       |       |  |       |       |       |     |      |       |       |       |       |  |      |      |  |      |  |      |       |      |  |      |      |

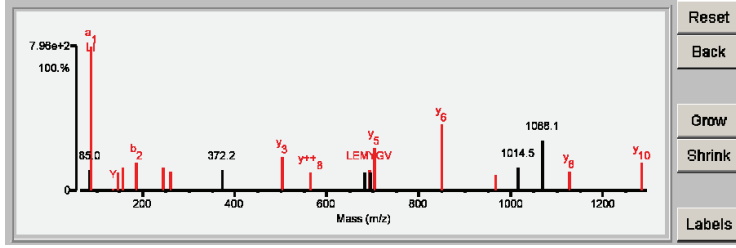

Result Summary

| Rank | Score | SPI (%) | BCS | # Unmatched Ions | # Variable sites | Sequence             | MH <sup>+</sup> Calculated (Da) | MH <sup>+</sup> Error (Da) | MH <sup>+</sup> Error (ppm) | Protein MW/pl (Da) | Species | Accession # | Protein Name                                                          |
|------|-------|---------|-----|------------------|------------------|----------------------|---------------------------------|----------------------------|-----------------------------|--------------------|---------|-------------|-----------------------------------------------------------------------|
| 1    | 12.43 | 69.9    | 7   | 8/24             | K109k            | (K)EIAKMAEMLVELVR(R) | 1631.8859                       | 114.0681                   | 14.4                        | 14649.7/4.69       | HUMAN   | Q9Y605      | MORF4 family-associated protein 1 OS=Homo sapiens GN=MRFAP1 PE=1 SV=1 |

Detailed Results

| Rank                    | Score | SPI (%) | BCS | # Unmatched Ions | # Variable sites | Sequence             | MH <sup>+</sup> Calculated (Da) | MH <sup>+</sup> Error (Da) | MH <sup>+</sup> Error (ppm) | Protein MW/pl (Da) | Species | Accession # | MS-Digest Index # | Protein Name                                                          |         |         |         |         |         |         |         |         |         |                       |         |         |         |         |         |         |      |      |  |
|-------------------------|-------|---------|-----|------------------|------------------|----------------------|---------------------------------|----------------------------|-----------------------------|--------------------|---------|-------------|-------------------|-----------------------------------------------------------------------|---------|---------|---------|---------|---------|---------|---------|---------|---------|-----------------------|---------|---------|---------|---------|---------|---------|------|------|--|
| 1                       | 12.43 | 69.9    | 7   | 8/24             | K109k            | (K)EIAKMAEMLVELVR(R) | 1631.8859                       | 114.0681                   | 14.4                        | 14649.7/4.69       | HUMAN   | Q9Y605      | 405769            | MORF4 family-associated protein 1 OS=Homo sapiens GN=MRFAP1 PE=1 SV=1 |         |         |         |         |         |         |         |         |         |                       |         |         |         |         |         |         |      |      |  |
| Fragment-Ion (m/z)      |       |         |     |                  |                  |                      | 72.079                          | 84.079                     | 86.096                      | 104.053            | 115.034 | 129.101     | 142.096           | 175.117                                                               | 197.120 | 201.082 | 215.138 | 229.116 | 314.181 | 370.239 | 387.265 | 445.229 | 461.188 | 471.267 <sup>+2</sup> | 516.312 | 615.388 | 649.319 | 728.478 | 859.480 | 869.422 |      |      |  |
| Frac. Inten. (% of TIC) |       |         |     |                  |                  |                      | 0.13                            | 10.62                      | 0.46                        | 5.70               | 1.90    | 0.08        | 1.96              | 5.72                                                                  | 2.45    | 2.40    | 6.43    | 3.58    | 1.93    | 2.03    | 6.97    | 2.68    | 2.21    | 3.32                  | 9.03    | 17.26   | 1.94    | 4.68    | 4.51    | 2.01    |      |      |  |
| Rel. Inten. (% of BP)   |       |         |     |                  |                  |                      | 0.78                            | 61.54                      | 2.68                        | 33.02              | 11.03   | 0.47        | 11.35             | 33.13                                                                 | 14.19   | 13.90   | 37.29   | 20.73   | 11.19   | 11.78   | 40.39   | 15.51   | 12.83   | 19.24                 | 52.32   | 100.00  | 11.23   | 27.15   | 26.14   | 11.66   |      |      |  |
| Score                   |       |         |     |                  |                  |                      | 0.50                            | -0.62                      | 0.22                        | -0.33              | -0.11   | 0.20        | -0.11             | 1.50                                                                  | -0.14   | 0.75    | 0.50    | 0.75    | 0.75    | 0.50    | 1.50    | 0.75    | 0.50    | 1.50                  | 0.75    | -0.13   | 1.50    | 1.50    | -0.11   | 1.50    | 1.50 | 0.25 |  |
| Ion-type                |       |         |     |                  |                  |                      | V                               | LI                         | LI                          |                    |         | RKQ         | y1                | AE                                                                    | a2      | VE      | b3      | y3-NH3  | y3      | AEML    |         |         |         |                       |         |         |         |         |         |         |      |      |  |
| Delta ppm               |       |         |     |                  |                  |                      | -17.7                           |                            | -2.6                        |                    |         | -12.7       | -10.6             |                                                                       | -32.2   | -8.4    | -14.8   |         |         |         |         |         |         |                       |         |         |         |         |         |         |      |      |  |

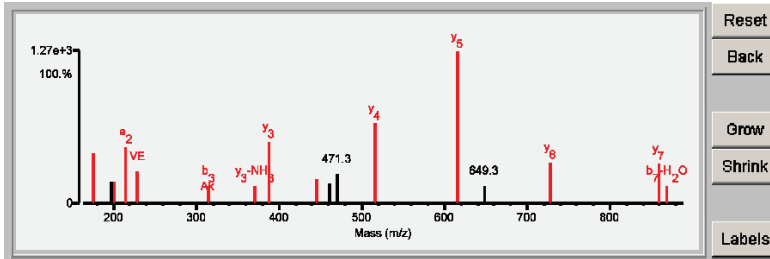

Result Summary

| Rank | Score | SPI (%) | BCS | # Unmatched Ions | Variable sites | Sequence                  | MH <sup>+</sup> Calculated (Da) | MH <sup>+</sup> Error (Da) | MH <sup>+</sup> Error (ppm) | Protein MW/pi (Da) | Species | Accession # | Protein Name                                                 |
|------|-------|---------|-----|------------------|----------------|---------------------------|---------------------------------|----------------------------|-----------------------------|--------------------|---------|-------------|--------------------------------------------------------------|
| 1    | 11.70 | 62.2    | 9   | 11/25            | K107k          | (R)ALGQNPTNAEVLKVLGNPK(S) | 1963.0971                       | 114.0557                   | 6.2                         | 22764.1/5.56       | HUMAN   | P14649      | Myosin light chain 6B OS=Homo sapiens GN=MYL6B PE=1 SV=1     |
| 1    | 11.70 | 62.2    | 9   | 11/25            | K50k           | (R)ALGQNPTNAEVLKVLGNPK(S) | 1963.0971                       | 114.0557                   | 6.2                         | 16930.2/4.56       | HUMAN   | P60660      | Myosin light polypeptide 6 OS=Homo sapiens GN=MYL6 PE=1 SV=2 |

Detailed Results

| Rank | Score | SPI (%) | BCS | # Unmatched Ions | Variable sites | Sequence                                                       | MH <sup>+</sup> Calculated (Da) | MH <sup>+</sup> Error (Da) | MH <sup>+</sup> Error (ppm) | Protein MW/pi (Da) | Species | Accession # | MS-Digest Index # | Protein Name                                                 |
|------|-------|---------|-----|------------------|----------------|----------------------------------------------------------------|---------------------------------|----------------------------|-----------------------------|--------------------|---------|-------------|-------------------|--------------------------------------------------------------|
| 1    | 11.70 | 62.2    | 9   | 11/25            | K107k          | (R)A L I G Q / N / P / T N A E / V L / k / V L / G N / P K (S) | 1963.0971                       | 114.0557                   | 6.2                         | 22764.1/5.56       | HUMAN   | P14649      | 429221            | Myosin light chain 6B OS=Homo sapiens GN=MYL6B PE=1 SV=1     |
| 1    | 11.70 | 62.2    | 9   | 11/25            | K50k           | (R)A L I G Q / N / P / T N A E / V L / k / V L / G N / P K (S) | 1963.0971                       | 114.0557                   | 6.2                         | 16930.2/4.56       | HUMAN   | P60660      | 429229            | Myosin light polypeptide 6 OS=Homo sapiens GN=MYL6 PE=1 SV=2 |

  

| Fragment-ion (m/z)      | 73.080 | 75.055 | 84.080 | 86.097 | 129.066 | 157.133 | 185.126 | 186.096 | 244.157 | 291.196 | 313.153 | 330.180 | 415.233 | 469.778 <sup>+2</sup> | 483.272 | 492.300 | 528.342 | 541.332 | 627.385 | 748.922 <sup>+2</sup> | 797.456 <sup>+2</sup> | 854.482 | 854.990 | 869.504 | 948.009 |
|-------------------------|--------|--------|--------|--------|---------|---------|---------|---------|---------|---------|---------|---------|---------|-----------------------|---------|---------|---------|---------|---------|-----------------------|-----------------------|---------|---------|---------|---------|
| Frac. Inten. (% of TIC) | 2.59   | 5.51   | 0.14   | 0.11   | 0.08    | 12.73   | 3.50    | 2.81    | 3.31    | 5.99    | 3.17    | 3.35    | 4.98    | 3.37                  | 3.11    | 2.63    | 3.23    | 4.74    | 5.79    | 3.65                  | 11.47                 | 5.40    | 2.88    | 3.14    | 2.34    |
| Rel. Inten. (% of BP)   | 20.34  | 43.31  | 1.06   | 0.85   | 0.60    | 100.00  | 27.51   | 22.09   | 26.02   | 47.02   | 24.87   | 26.33   | 39.16   | 26.44                 | 24.46   | 20.64   | 25.36   | 37.26   | 45.45   | 28.66                 | 90.11                 | 42.40   | 22.59   | 24.65   | 18.41   |
| Score                   | -0.20  | -0.43  | 0.50   | 0.22   | 0.20    | 0.50    | 0.50    | -0.22   | 1.50    | -0.47   | 0.75    | -0.26   | 1.50    | -0.26                 | -0.24   | -0.21   | -0.25   | 1.50    | 1.50    | 1.50                  | 1.50                  | 1.50    | -0.23   | 1.50    | -0.18   |
| Ion-type                |        |        | KQ     | LI     | QKR     | a2      | b2      |         | y2      | PTN     |         | y4      |         |                       |         |         |         | y6      | y6      | y6                    | y13                   | y14     | y14     | y7      | y7      |
| Delta ppm               |        |        | -9.2   | 5.5    | 1.1     | -1.5    | -12.2   |         | -36.7   |         | 6.6     |         | 7.8     |                       |         |         |         | -14.7   | 3.4     | -4.1                  | 5.3                   | 10.7    |         | -18.3   |         |

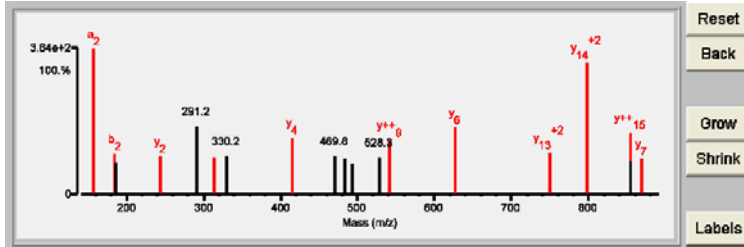

Result Summary

| Rank | Score | SPI (%) | BCS | # Unmatched Ions | # Variable sites | Sequence                               | MH <sup>+</sup> Calculated (Da) | MH <sup>+</sup> Error (Da) | MH <sup>+</sup> Error (ppm) | Protein MW/pI (Da) | Species | Accession # | Protein Name                                              |
|------|-------|---------|-----|------------------|------------------|----------------------------------------|---------------------------------|----------------------------|-----------------------------|--------------------|---------|-------------|-----------------------------------------------------------|
| 1    | 15.64 | 82.8    | 8   | 8/25             | K91k             | (R) LIGIGT k/M/L N H/V/L/N I/C E/K (D) | 1940.0456                       | 114.0578                   | 7.2                         | 19398.5/8.96       | HUMAN   | Q9GZZ1      | N-acetyltransferase 13 OS=Homo sapiens GN=NAT13 PE=1 SV=1 |

Detailed Results

| Rank | Score | SPI (%) | BCS | # Unmatched Ions | # Variable sites | Sequence                               | MH <sup>+</sup> Calculated (Da) | MH <sup>+</sup> Error (Da) | MH <sup>+</sup> Error (ppm) | Protein MW/pI (Da) | Species | Accession # | MS-Digest Index # | Protein Name                                              |
|------|-------|---------|-----|------------------|------------------|----------------------------------------|---------------------------------|----------------------------|-----------------------------|--------------------|---------|-------------|-------------------|-----------------------------------------------------------|
| 1    | 15.64 | 82.8    | 8   | 8/25             | K91k             | (R) LIGIGT k/M/L N H/V/L/N I/C E/K (D) | 1940.0456                       | 114.0578                   | 7.2                         | 19398.5/8.96       | HUMAN   | Q9GZZ1      | 435007            | N-acetyltransferase 13 OS=Homo sapiens GN=NAT13 PE=1 SV=1 |

  

| Fragment-ion (m/z)      | 69.071 | 72.081 | 84.080 | 86.096         | 87.055 | 110.070 | 129.100 | 130.085                         | 133.041 | 141.102 | 143.115        | 147.113        | 171.111        | 308.170 | 346.191 | 365.188 | 418.197 | 436.185        | 485.224 | 620.328 <sup>+2</sup>         | 629.342 <sup>+3</sup> | 663.327        | 685.855           | 776.399        | 875.467        |
|-------------------------|--------|--------|--------|----------------|--------|---------|---------|---------------------------------|---------|---------|----------------|----------------|----------------|---------|---------|---------|---------|----------------|---------|-------------------------------|-----------------------|----------------|-------------------|----------------|----------------|
| Frac. Inten. (% of TIC) | 2.35   | 0.11   | 0.42   | 44.02          | 0.06   | 0.21    | 0.10    | 1.77                            | 1.90    | 1.91    | 9.50           | 2.12           | 2.27           | 1.86    | 1.81    | 1.76    | 3.32    | 5.49           | 2.11    | 1.94                          | 1.97                  | 3.06           | 3.97              | 3.03           | 2.94           |
| Rel. Inten. (% of BP)   | 5.34   | 0.26   | 0.95   | 100.00         | 0.13   | 0.48    | 0.24    | 4.03                            | 4.31    | 4.35    | 21.58          | 4.82           | 5.17           | 4.22    | 4.12    | 3.99    | 7.55    | 12.47          | 4.79    | 4.40                          | 4.47                  | 6.94           | 9.03              | 6.88           | 6.67           |
| Score                   | -0.05  | 0.50   | 0.50   | 0.50           | 0.33   | 1.00    | 0.20    | 0.50                            | -0.04   | -0.04   | 0.50           | 1.50           | 0.75           | -0.04   | -0.04   | 0.75    | -0.08   | 1.50           | -0.05   | 1.50                          | -0.04                 | 1.50           | 1.50              | 1.50           | 1.50           |
| Ion-type                |        | V      | KQ     | a <sub>1</sub> | NR     | H       | RKQ     | y <sub>1</sub> -NH <sub>3</sub> |         |         | a <sub>2</sub> | y <sub>1</sub> | b <sub>2</sub> |         |         | LNH     |         | y <sub>3</sub> |         | y <sub>10</sub> <sup>+2</sup> |                       | y <sub>5</sub> | y <sup>++11</sup> | y <sub>6</sub> | y <sub>7</sub> |
| Delta ppm               |        | 0.3    | -8.0   | -10.8          | 0.1    | -14.3   | -18.9   | -12.0                           |         |         | -17.4          | 4.1            | -12.9          |         |         | -14.7   |         | -2.6           |         | -1.7                          |                       | 21.5           | 8.3               | 2.1            | 2.3            |

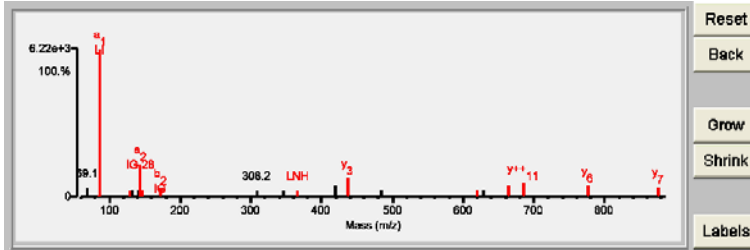

Result Summary

| Rank | Score | SPI (%) | BCS | # Unmatched Ions | Variable sites | Sequence                   | MH <sup>+</sup> Calculated (Da) | MH <sup>+</sup> Error (Da) | MH <sup>+</sup> Error (ppm) | Protein MW/PI (Da) | Species | Accession # | Protein Name                                                                        |
|------|-------|---------|-----|------------------|----------------|----------------------------|---------------------------------|----------------------------|-----------------------------|--------------------|---------|-------------|-------------------------------------------------------------------------------------|
| 1    | 14.99 | 68.1    | 9   | 9/25             | K126k          | (R)TLAEIAKVELDNMPLR(G)     | 1812.9888                       | 114.0564                   | 7.0                         | 54231.9/9.01       | HUMAN   | Q15233      | Non-POU domain-containing octamer-binding protein OS=Homo sapiens GN=NONO PE=1 SV=4 |
| 2    | 5.67  | 50.1    | 2   | 14/25            | M507m          | (K)ELVSVmVTLLALHISVGSRR(I) | 1911.0732                       | 15.9720                    | -11.9                       | 446704.2/6.12      | HUMAN   | RQ8TCZ9     | REVERSE Fibrocystin OS=Homo sapiens GN=PKHD1 PE=1 SV=1                              |

Detailed Results

| Rank                                                                                                                                                                                                                                                                                                                                                                                                                                                                                                                                                                                                                                                                                                                                                                                                                                                                                                                                                                                                                                                                                                                                                                                                                                                                                                                                                                                                                                                                                                                                                                                                                                                                                                                                                                                                                                                                                                                                                                                                                                                                                                                                                                                                                                                                                                                                                                                                                                                                                                                                                                 | Score  | SPI (%) | BCS    | # Unmatched Ions | Variable sites | Sequence                                      | MH <sup>+</sup> Calculated (Da) | MH <sup>+</sup> Error (Da) | MH <sup>+</sup> Error (ppm) | Protein MW/PI (Da) | Species | Accession # | MS-Digest Index # | Protein Name                                                                        |                    |         |         |         |                       |         |                       |         |         |         |          |         |         |         |         |         |         |         |         |                       |         |                       |         |         |         |          |                         |      |      |      |      |      |      |       |      |      |      |      |      |      |      |      |      |      |      |      |      |      |      |      |      |      |                       |      |      |      |       |      |       |        |       |       |       |       |       |       |      |       |       |       |      |       |       |       |      |       |       |       |       |      |      |      |       |      |      |      |       |      |      |       |       |      |       |      |       |       |      |      |      |       |      |       |      |      |          |    |   |        |    |    |    |    |    |    |    |    |    |    |    |    |    |    |    |    |    |    |    |    |    |    |           |       |      |       |      |   |       |       |       |      |      |       |        |       |       |       |       |       |       |       |       |       |       |       |       |       |
|----------------------------------------------------------------------------------------------------------------------------------------------------------------------------------------------------------------------------------------------------------------------------------------------------------------------------------------------------------------------------------------------------------------------------------------------------------------------------------------------------------------------------------------------------------------------------------------------------------------------------------------------------------------------------------------------------------------------------------------------------------------------------------------------------------------------------------------------------------------------------------------------------------------------------------------------------------------------------------------------------------------------------------------------------------------------------------------------------------------------------------------------------------------------------------------------------------------------------------------------------------------------------------------------------------------------------------------------------------------------------------------------------------------------------------------------------------------------------------------------------------------------------------------------------------------------------------------------------------------------------------------------------------------------------------------------------------------------------------------------------------------------------------------------------------------------------------------------------------------------------------------------------------------------------------------------------------------------------------------------------------------------------------------------------------------------------------------------------------------------------------------------------------------------------------------------------------------------------------------------------------------------------------------------------------------------------------------------------------------------------------------------------------------------------------------------------------------------------------------------------------------------------------------------------------------------|--------|---------|--------|------------------|----------------|-----------------------------------------------|---------------------------------|----------------------------|-----------------------------|--------------------|---------|-------------|-------------------|-------------------------------------------------------------------------------------|--------------------|---------|---------|---------|-----------------------|---------|-----------------------|---------|---------|---------|----------|---------|---------|---------|---------|---------|---------|---------|---------|-----------------------|---------|-----------------------|---------|---------|---------|----------|-------------------------|------|------|------|------|------|------|-------|------|------|------|------|------|------|------|------|------|------|------|------|------|------|------|------|------|------|-----------------------|------|------|------|-------|------|-------|--------|-------|-------|-------|-------|-------|-------|------|-------|-------|-------|------|-------|-------|-------|------|-------|-------|-------|-------|------|------|------|-------|------|------|------|-------|------|------|-------|-------|------|-------|------|-------|-------|------|------|------|-------|------|-------|------|------|----------|----|---|--------|----|----|----|----|----|----|----|----|----|----|----|----|----|----|----|----|----|----|----|----|----|----|-----------|-------|------|-------|------|---|-------|-------|-------|------|------|-------|--------|-------|-------|-------|-------|-------|-------|-------|-------|-------|-------|-------|-------|-------|
| 1                                                                                                                                                                                                                                                                                                                                                                                                                                                                                                                                                                                                                                                                                                                                                                                                                                                                                                                                                                                                                                                                                                                                                                                                                                                                                                                                                                                                                                                                                                                                                                                                                                                                                                                                                                                                                                                                                                                                                                                                                                                                                                                                                                                                                                                                                                                                                                                                                                                                                                                                                                    | 14.99  | 68.1    | 9      | 9/25             | K126k          | (R) T L I A E I A / k V E L / D N M P L R (G) | 1812.9888                       | 114.0564                   | 7.0                         | 54231.9/9.01       | HUMAN   | Q15233      | 447819            | Non-POU domain-containing octamer-binding protein OS=Homo sapiens GN=NONO PE=1 SV=4 |                    |         |         |         |                       |         |                       |         |         |         |          |         |         |         |         |         |         |         |         |                       |         |                       |         |         |         |          |                         |      |      |      |      |      |      |       |      |      |      |      |      |      |      |      |      |      |      |      |      |      |      |      |      |      |                       |      |      |      |       |      |       |        |       |       |       |       |       |       |      |       |       |       |      |       |       |       |      |       |       |       |       |      |      |      |       |      |      |      |       |      |      |       |       |      |       |      |       |       |      |      |      |       |      |       |      |      |          |    |   |        |    |    |    |    |    |    |    |    |    |    |    |    |    |    |    |    |    |    |    |    |    |    |           |       |      |       |      |   |       |       |       |      |      |       |        |       |       |       |       |       |       |       |       |       |       |       |       |       |
| <table border="1"> <thead> <tr> <th>Fragment-ion (m/z)</th> <th>70.064</th> <th>72.083</th> <th>84.043</th> <th>84.081</th> <th>86.096</th> <th>175.116</th> <th>187.144</th> <th>201.111</th> <th>215.138</th> <th>286.169</th> <th>308.149</th> <th>312.184</th> <th>314.171</th> <th>368.252</th> <th>385.257</th> <th>596.239</th> <th>627.314</th> <th>664.851</th> <th>700.372<sup>+2</sup></th> <th>745.348</th> <th>756.395<sup>+2</sup></th> <th>856.986</th> <th>857.444</th> <th>987.500</th> <th>1086.574</th> </tr> </thead> <tbody> <tr> <td>Frac. Inten. (% of TIC)</td> <td>0.00</td> <td>0.09</td> <td>0.11</td> <td>3.92</td> <td>0.49</td> <td>3.91</td> <td>22.19</td> <td>2.31</td> <td>4.64</td> <td>2.57</td> <td>2.47</td> <td>2.77</td> <td>3.38</td> <td>2.13</td> <td>5.21</td> <td>2.97</td> <td>2.63</td> <td>2.17</td> <td>3.39</td> <td>4.96</td> <td>5.19</td> <td>2.06</td> <td>7.49</td> <td>5.30</td> <td>7.63</td> </tr> <tr> <td>Rel. Inten. (% of BP)</td> <td>0.01</td> <td>0.40</td> <td>0.50</td> <td>17.68</td> <td>2.22</td> <td>17.60</td> <td>100.00</td> <td>10.40</td> <td>20.92</td> <td>11.59</td> <td>11.12</td> <td>12.46</td> <td>15.25</td> <td>9.60</td> <td>23.49</td> <td>13.38</td> <td>11.83</td> <td>9.79</td> <td>15.29</td> <td>22.37</td> <td>23.37</td> <td>9.26</td> <td>33.77</td> <td>23.90</td> <td>34.39</td> </tr> <tr> <td>Score</td> <td>0.20</td> <td>0.50</td> <td>1.00</td> <td>-0.18</td> <td>0.22</td> <td>1.50</td> <td>0.50</td> <td>-0.10</td> <td>0.50</td> <td>0.50</td> <td>-0.11</td> <td>-0.12</td> <td>0.75</td> <td>-0.10</td> <td>1.50</td> <td>-0.13</td> <td>-0.12</td> <td>1.50</td> <td>1.50</td> <td>1.50</td> <td>-0.23</td> <td>1.50</td> <td>-0.34</td> <td>1.50</td> <td>1.50</td> </tr> <tr> <td>Ion-type</td> <td>PR</td> <td>V</td> <td>b1+H2O</td> <td>LI</td> <td>y1</td> <td>a2</td> <td>b2</td> <td>b3</td> <td>b2</td> <td>b3</td> <td>Ak</td> <td>y3</td> </tr> <tr> <td>Delta ppm</td> <td>-16.1</td> <td>30.9</td> <td>-33.2</td> <td>1.00</td> <td>E</td> <td>-20.1</td> <td>-10.8</td> <td>-19.1</td> <td>-4.8</td> <td>-8.0</td> <td>-27.4</td> <td>EIA-28</td> <td>-27.4</td> </tr> </tbody> </table> |        |         |        |                  |                |                                               |                                 |                            |                             |                    |         |             |                   |                                                                                     | Fragment-ion (m/z) | 70.064  | 72.083  | 84.043  | 84.081                | 86.096  | 175.116               | 187.144 | 201.111 | 215.138 | 286.169  | 308.149 | 312.184 | 314.171 | 368.252 | 385.257 | 596.239 | 627.314 | 664.851 | 700.372 <sup>+2</sup> | 745.348 | 756.395 <sup>+2</sup> | 856.986 | 857.444 | 987.500 | 1086.574 | Frac. Inten. (% of TIC) | 0.00 | 0.09 | 0.11 | 3.92 | 0.49 | 3.91 | 22.19 | 2.31 | 4.64 | 2.57 | 2.47 | 2.77 | 3.38 | 2.13 | 5.21 | 2.97 | 2.63 | 2.17 | 3.39 | 4.96 | 5.19 | 2.06 | 7.49 | 5.30 | 7.63 | Rel. Inten. (% of BP) | 0.01 | 0.40 | 0.50 | 17.68 | 2.22 | 17.60 | 100.00 | 10.40 | 20.92 | 11.59 | 11.12 | 12.46 | 15.25 | 9.60 | 23.49 | 13.38 | 11.83 | 9.79 | 15.29 | 22.37 | 23.37 | 9.26 | 33.77 | 23.90 | 34.39 | Score | 0.20 | 0.50 | 1.00 | -0.18 | 0.22 | 1.50 | 0.50 | -0.10 | 0.50 | 0.50 | -0.11 | -0.12 | 0.75 | -0.10 | 1.50 | -0.13 | -0.12 | 1.50 | 1.50 | 1.50 | -0.23 | 1.50 | -0.34 | 1.50 | 1.50 | Ion-type | PR | V | b1+H2O | LI | y1 | a2 | b2 | b3 | b2 | b3 | Ak | y3 | y3 | y3 | y3 | y3 | y3 | y3 | y3 | y3 | y3 | y3 | y3 | y3 | y3 | Delta ppm | -16.1 | 30.9 | -33.2 | 1.00 | E | -20.1 | -10.8 | -19.1 | -4.8 | -8.0 | -27.4 | EIA-28 | -27.4 | -27.4 | -27.4 | -27.4 | -27.4 | -27.4 | -27.4 | -27.4 | -27.4 | -27.4 | -27.4 | -27.4 | -27.4 |
| Fragment-ion (m/z)                                                                                                                                                                                                                                                                                                                                                                                                                                                                                                                                                                                                                                                                                                                                                                                                                                                                                                                                                                                                                                                                                                                                                                                                                                                                                                                                                                                                                                                                                                                                                                                                                                                                                                                                                                                                                                                                                                                                                                                                                                                                                                                                                                                                                                                                                                                                                                                                                                                                                                                                                   | 70.064 | 72.083  | 84.043 | 84.081           | 86.096         | 175.116                                       | 187.144                         | 201.111                    | 215.138                     | 286.169            | 308.149 | 312.184     | 314.171           | 368.252                                                                             | 385.257            | 596.239 | 627.314 | 664.851 | 700.372 <sup>+2</sup> | 745.348 | 756.395 <sup>+2</sup> | 856.986 | 857.444 | 987.500 | 1086.574 |         |         |         |         |         |         |         |         |                       |         |                       |         |         |         |          |                         |      |      |      |      |      |      |       |      |      |      |      |      |      |      |      |      |      |      |      |      |      |      |      |      |      |                       |      |      |      |       |      |       |        |       |       |       |       |       |       |      |       |       |       |      |       |       |       |      |       |       |       |       |      |      |      |       |      |      |      |       |      |      |       |       |      |       |      |       |       |      |      |      |       |      |       |      |      |          |    |   |        |    |    |    |    |    |    |    |    |    |    |    |    |    |    |    |    |    |    |    |    |    |    |           |       |      |       |      |   |       |       |       |      |      |       |        |       |       |       |       |       |       |       |       |       |       |       |       |       |
| Frac. Inten. (% of TIC)                                                                                                                                                                                                                                                                                                                                                                                                                                                                                                                                                                                                                                                                                                                                                                                                                                                                                                                                                                                                                                                                                                                                                                                                                                                                                                                                                                                                                                                                                                                                                                                                                                                                                                                                                                                                                                                                                                                                                                                                                                                                                                                                                                                                                                                                                                                                                                                                                                                                                                                                              | 0.00   | 0.09    | 0.11   | 3.92             | 0.49           | 3.91                                          | 22.19                           | 2.31                       | 4.64                        | 2.57               | 2.47    | 2.77        | 3.38              | 2.13                                                                                | 5.21               | 2.97    | 2.63    | 2.17    | 3.39                  | 4.96    | 5.19                  | 2.06    | 7.49    | 5.30    | 7.63     |         |         |         |         |         |         |         |         |                       |         |                       |         |         |         |          |                         |      |      |      |      |      |      |       |      |      |      |      |      |      |      |      |      |      |      |      |      |      |      |      |      |      |                       |      |      |      |       |      |       |        |       |       |       |       |       |       |      |       |       |       |      |       |       |       |      |       |       |       |       |      |      |      |       |      |      |      |       |      |      |       |       |      |       |      |       |       |      |      |      |       |      |       |      |      |          |    |   |        |    |    |    |    |    |    |    |    |    |    |    |    |    |    |    |    |    |    |    |    |    |    |           |       |      |       |      |   |       |       |       |      |      |       |        |       |       |       |       |       |       |       |       |       |       |       |       |       |
| Rel. Inten. (% of BP)                                                                                                                                                                                                                                                                                                                                                                                                                                                                                                                                                                                                                                                                                                                                                                                                                                                                                                                                                                                                                                                                                                                                                                                                                                                                                                                                                                                                                                                                                                                                                                                                                                                                                                                                                                                                                                                                                                                                                                                                                                                                                                                                                                                                                                                                                                                                                                                                                                                                                                                                                | 0.01   | 0.40    | 0.50   | 17.68            | 2.22           | 17.60                                         | 100.00                          | 10.40                      | 20.92                       | 11.59              | 11.12   | 12.46       | 15.25             | 9.60                                                                                | 23.49              | 13.38   | 11.83   | 9.79    | 15.29                 | 22.37   | 23.37                 | 9.26    | 33.77   | 23.90   | 34.39    |         |         |         |         |         |         |         |         |                       |         |                       |         |         |         |          |                         |      |      |      |      |      |      |       |      |      |      |      |      |      |      |      |      |      |      |      |      |      |      |      |      |      |                       |      |      |      |       |      |       |        |       |       |       |       |       |       |      |       |       |       |      |       |       |       |      |       |       |       |       |      |      |      |       |      |      |      |       |      |      |       |       |      |       |      |       |       |      |      |      |       |      |       |      |      |          |    |   |        |    |    |    |    |    |    |    |    |    |    |    |    |    |    |    |    |    |    |    |    |    |    |           |       |      |       |      |   |       |       |       |      |      |       |        |       |       |       |       |       |       |       |       |       |       |       |       |       |
| Score                                                                                                                                                                                                                                                                                                                                                                                                                                                                                                                                                                                                                                                                                                                                                                                                                                                                                                                                                                                                                                                                                                                                                                                                                                                                                                                                                                                                                                                                                                                                                                                                                                                                                                                                                                                                                                                                                                                                                                                                                                                                                                                                                                                                                                                                                                                                                                                                                                                                                                                                                                | 0.20   | 0.50    | 1.00   | -0.18            | 0.22           | 1.50                                          | 0.50                            | -0.10                      | 0.50                        | 0.50               | -0.11   | -0.12       | 0.75              | -0.10                                                                               | 1.50               | -0.13   | -0.12   | 1.50    | 1.50                  | 1.50    | -0.23                 | 1.50    | -0.34   | 1.50    | 1.50     |         |         |         |         |         |         |         |         |                       |         |                       |         |         |         |          |                         |      |      |      |      |      |      |       |      |      |      |      |      |      |      |      |      |      |      |      |      |      |      |      |      |      |                       |      |      |      |       |      |       |        |       |       |       |       |       |       |      |       |       |       |      |       |       |       |      |       |       |       |       |      |      |      |       |      |      |      |       |      |      |       |       |      |       |      |       |       |      |      |      |       |      |       |      |      |          |    |   |        |    |    |    |    |    |    |    |    |    |    |    |    |    |    |    |    |    |    |    |    |    |    |           |       |      |       |      |   |       |       |       |      |      |       |        |       |       |       |       |       |       |       |       |       |       |       |       |       |
| Ion-type                                                                                                                                                                                                                                                                                                                                                                                                                                                                                                                                                                                                                                                                                                                                                                                                                                                                                                                                                                                                                                                                                                                                                                                                                                                                                                                                                                                                                                                                                                                                                                                                                                                                                                                                                                                                                                                                                                                                                                                                                                                                                                                                                                                                                                                                                                                                                                                                                                                                                                                                                             | PR     | V       | b1+H2O | LI               | y1             | a2                                            | b2                              | b3                         | b2                          | b3                 | Ak      | y3          | y3                | y3                                                                                  | y3                 | y3      | y3      | y3      | y3                    | y3      | y3                    | y3      | y3      | y3      | y3       |         |         |         |         |         |         |         |         |                       |         |                       |         |         |         |          |                         |      |      |      |      |      |      |       |      |      |      |      |      |      |      |      |      |      |      |      |      |      |      |      |      |      |                       |      |      |      |       |      |       |        |       |       |       |       |       |       |      |       |       |       |      |       |       |       |      |       |       |       |       |      |      |      |       |      |      |      |       |      |      |       |       |      |       |      |       |       |      |      |      |       |      |       |      |      |          |    |   |        |    |    |    |    |    |    |    |    |    |    |    |    |    |    |    |    |    |    |    |    |    |    |           |       |      |       |      |   |       |       |       |      |      |       |        |       |       |       |       |       |       |       |       |       |       |       |       |       |
| Delta ppm                                                                                                                                                                                                                                                                                                                                                                                                                                                                                                                                                                                                                                                                                                                                                                                                                                                                                                                                                                                                                                                                                                                                                                                                                                                                                                                                                                                                                                                                                                                                                                                                                                                                                                                                                                                                                                                                                                                                                                                                                                                                                                                                                                                                                                                                                                                                                                                                                                                                                                                                                            | -16.1  | 30.9    | -33.2  | 1.00             | E              | -20.1                                         | -10.8                           | -19.1                      | -4.8                        | -8.0               | -27.4   | EIA-28      | -27.4             | -27.4                                                                               | -27.4              | -27.4   | -27.4   | -27.4   | -27.4                 | -27.4   | -27.4                 | -27.4   | -27.4   | -27.4   | -27.4    |         |         |         |         |         |         |         |         |                       |         |                       |         |         |         |          |                         |      |      |      |      |      |      |       |      |      |      |      |      |      |      |      |      |      |      |      |      |      |      |      |      |      |                       |      |      |      |       |      |       |        |       |       |       |       |       |       |      |       |       |       |      |       |       |       |      |       |       |       |       |      |      |      |       |      |      |      |       |      |      |       |       |      |       |      |       |       |      |      |      |       |      |       |      |      |          |    |   |        |    |    |    |    |    |    |    |    |    |    |    |    |    |    |    |    |    |    |    |    |    |    |           |       |      |       |      |   |       |       |       |      |      |       |        |       |       |       |       |       |       |       |       |       |       |       |       |       |

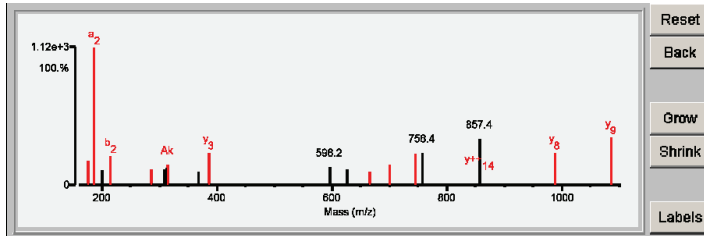

Reset

Back

Grow

Shrink

Labels

Result Summary

| Rank | Score | SPI (%) | BCS | # Unmatched Ions | Variable sites | Sequence             | MH <sup>+</sup> Calculated (Da) | MH <sup>+</sup> Error (Da) | MH <sup>+</sup> Error (ppm) | Protein MW/pI (Da) | Species | Accession # | Protein Name                                                                        |
|------|-------|---------|-----|------------------|----------------|----------------------|---------------------------------|----------------------------|-----------------------------|--------------------|---------|-------------|-------------------------------------------------------------------------------------|
| 1    | 15.49 | 79.5    | 10  | 4/24             | K371k          | (R)RQQEGFGKTFPDAR(E) | 1636.8190                       | 114.0583                   | 8.8                         | 54231.9/9.01       | HUMAN   | Q15233      | Non-POU domain-containing octamer-binding protein OS=Homo sapiens GN=NONO PE=1 SV=4 |
| 2    | 6.24  | 50.9    | 3   | 10/24            | K99k           | (R)KTNMLWQVFDQAR(R)  | 1636.8264                       | 114.0509                   | 4.6                         | 20909.3/5.85       | HUMAN   | RP01275     | REVERSE Glucagon OS=Homo sapiens GN=GCG PE=1 SV=3                                   |

Detailed Results

| Rank                                                                                                                                                                                                                                                                                                                                                                                                                                                                                                                                                                                                                                                                                                                                                                                                                                                                                                                                                                                                                                                                                                                                                                                                                                                                                                                                                                                                                                                                                                                                                                                                                                                                                                                                                                                                                                                                                                                                                                                                                                                                                                                                                                                                                                                                                                                                                                                                                                                                                                                                                                                                                                                                           | Score  | SPI (%) | BCS    | # Unmatched Ions | Variable sites | Sequence             | MH <sup>+</sup> Calculated (Da) | MH <sup>+</sup> Error (Da) | MH <sup>+</sup> Error (ppm) | Protein MW/pI (Da) | Species | Accession # | MS-Digest Index # | Protein Name                                                                        |                    |         |         |         |         |         |         |         |         |         |         |         |         |         |         |         |         |         |         |         |         |         |         |         |         |                         |      |      |      |      |      |      |      |      |      |      |      |      |       |      |      |      |      |      |      |      |      |      |      |      |                       |      |       |      |      |       |      |       |      |      |       |       |       |        |       |       |       |       |       |       |       |       |       |       |       |       |      |       |      |      |       |      |       |      |      |      |      |      |      |       |      |      |      |      |      |      |      |      |      |      |          |    |  |   |    |  |    |  |   |   |        |    |      |    |  |    |    |    |    |    |    |    |    |    |    |           |     |  |     |      |  |       |  |       |     |      |     |      |     |  |       |      |      |     |      |      |     |      |      |      |  |  |  |  |  |  |  |  |  |  |  |  |  |  |  |  |  |  |  |  |  |  |  |        |      |
|--------------------------------------------------------------------------------------------------------------------------------------------------------------------------------------------------------------------------------------------------------------------------------------------------------------------------------------------------------------------------------------------------------------------------------------------------------------------------------------------------------------------------------------------------------------------------------------------------------------------------------------------------------------------------------------------------------------------------------------------------------------------------------------------------------------------------------------------------------------------------------------------------------------------------------------------------------------------------------------------------------------------------------------------------------------------------------------------------------------------------------------------------------------------------------------------------------------------------------------------------------------------------------------------------------------------------------------------------------------------------------------------------------------------------------------------------------------------------------------------------------------------------------------------------------------------------------------------------------------------------------------------------------------------------------------------------------------------------------------------------------------------------------------------------------------------------------------------------------------------------------------------------------------------------------------------------------------------------------------------------------------------------------------------------------------------------------------------------------------------------------------------------------------------------------------------------------------------------------------------------------------------------------------------------------------------------------------------------------------------------------------------------------------------------------------------------------------------------------------------------------------------------------------------------------------------------------------------------------------------------------------------------------------------------------|--------|---------|--------|------------------|----------------|----------------------|---------------------------------|----------------------------|-----------------------------|--------------------|---------|-------------|-------------------|-------------------------------------------------------------------------------------|--------------------|---------|---------|---------|---------|---------|---------|---------|---------|---------|---------|---------|---------|---------|---------|---------|---------|---------|---------|---------|---------|---------|---------|---------|---------|-------------------------|------|------|------|------|------|------|------|------|------|------|------|------|-------|------|------|------|------|------|------|------|------|------|------|------|-----------------------|------|-------|------|------|-------|------|-------|------|------|-------|-------|-------|--------|-------|-------|-------|-------|-------|-------|-------|-------|-------|-------|-------|-------|------|-------|------|------|-------|------|-------|------|------|------|------|------|------|-------|------|------|------|------|------|------|------|------|------|------|----------|----|--|---|----|--|----|--|---|---|--------|----|------|----|--|----|----|----|----|----|----|----|----|----|----|-----------|-----|--|-----|------|--|-------|--|-------|-----|------|-----|------|-----|--|-------|------|------|-----|------|------|-----|------|------|------|--|--|--|--|--|--|--|--|--|--|--|--|--|--|--|--|--|--|--|--|--|--|--|--------|------|
| 1                                                                                                                                                                                                                                                                                                                                                                                                                                                                                                                                                                                                                                                                                                                                                                                                                                                                                                                                                                                                                                                                                                                                                                                                                                                                                                                                                                                                                                                                                                                                                                                                                                                                                                                                                                                                                                                                                                                                                                                                                                                                                                                                                                                                                                                                                                                                                                                                                                                                                                                                                                                                                                                                              | 15.49  | 79.5    | 10     | 4/24             | K371k          | (R)RQQEGFGKTFPDAR(E) | 1636.8190                       | 114.0583                   | 8.8                         | 54231.9/9.01       | HUMAN   | Q15233      | 447819            | Non-POU domain-containing octamer-binding protein OS=Homo sapiens GN=NONO PE=1 SV=4 |                    |         |         |         |         |         |         |         |         |         |         |         |         |         |         |         |         |         |         |         |         |         |         |         |         |                         |      |      |      |      |      |      |      |      |      |      |      |      |       |      |      |      |      |      |      |      |      |      |      |      |                       |      |       |      |      |       |      |       |      |      |       |       |       |        |       |       |       |       |       |       |       |       |       |       |       |       |      |       |      |      |       |      |       |      |      |      |      |      |      |       |      |      |      |      |      |      |      |      |      |      |          |    |  |   |    |  |    |  |   |   |        |    |      |    |  |    |    |    |    |    |    |    |    |    |    |           |     |  |     |      |  |       |  |       |     |      |     |      |     |  |       |      |      |     |      |      |     |      |      |      |  |  |  |  |  |  |  |  |  |  |  |  |  |  |  |  |  |  |  |  |  |  |  |        |      |
| <table border="1"> <thead> <tr> <th>Fragment-ion (m/z)</th> <th>70.066</th> <th>72.078</th> <th>84.045</th> <th>84.081</th> <th>86.096</th> <th>87.053</th> <th>90.095</th> <th>112.085</th> <th>120.081</th> <th>158.091</th> <th>175.119</th> <th>229.624</th> <th>246.158</th> <th>247.159</th> <th>285.162</th> <th>300.166</th> <th>361.180</th> <th>413.228</th> <th>458.234</th> <th>542.265</th> <th>599.295</th> <th>718.362</th> <th>746.358</th> <th>763.393</th> </tr> </thead> <tbody> <tr> <td>Frac. Inten. (% of TIC)</td> <td>0.00</td> <td>2.45</td> <td>0.15</td> <td>0.71</td> <td>6.14</td> <td>0.08</td> <td>8.22</td> <td>0.08</td> <td>0.78</td> <td>2.44</td> <td>6.46</td> <td>4.11</td> <td>18.24</td> <td>3.74</td> <td>2.72</td> <td>2.90</td> <td>5.86</td> <td>3.92</td> <td>8.91</td> <td>4.38</td> <td>3.26</td> <td>4.16</td> <td>4.48</td> <td>5.79</td> </tr> <tr> <td>Rel. Inten. (% of BP)</td> <td>0.00</td> <td>13.45</td> <td>0.82</td> <td>3.89</td> <td>33.64</td> <td>0.45</td> <td>45.04</td> <td>0.45</td> <td>4.30</td> <td>13.39</td> <td>35.38</td> <td>22.50</td> <td>100.00</td> <td>20.51</td> <td>14.88</td> <td>15.92</td> <td>32.12</td> <td>21.48</td> <td>48.84</td> <td>24.03</td> <td>17.88</td> <td>22.81</td> <td>24.57</td> <td>31.74</td> </tr> <tr> <td>Score</td> <td>0.20</td> <td>-0.13</td> <td>1.00</td> <td>0.50</td> <td>-0.34</td> <td>0.33</td> <td>-0.45</td> <td>0.33</td> <td>1.00</td> <td>0.50</td> <td>1.50</td> <td>1.50</td> <td>1.50</td> <td>-0.21</td> <td>0.50</td> <td>0.75</td> <td>1.50</td> <td>0.50</td> <td>1.50</td> <td>0.50</td> <td>0.50</td> <td>0.50</td> <td>0.50</td> <td>1.50</td> </tr> <tr> <td>Ion-type</td> <td>PR</td> <td></td> <td>E</td> <td>KQ</td> <td></td> <td>NR</td> <td></td> <td>R</td> <td>F</td> <td>y1-NH3</td> <td>y1</td> <td>y++4</td> <td>y2</td> <td></td> <td>b2</td> <td>KG</td> <td>y3</td> <td>b3</td> <td>y4</td> <td>b4</td> <td>b5</td> <td>ag</td> <td>bg</td> <td>y7</td> </tr> <tr> <td>Delta ppm</td> <td>8.2</td> <td></td> <td>6.1</td> <td>-2.1</td> <td></td> <td>-30.9</td> <td></td> <td>-16.3</td> <td>0.2</td> <td>-8.2</td> <td>2.6</td> <td>11.2</td> <td>6.6</td> <td></td> <td>-21.6</td> <td>-6.8</td> <td>-7.8</td> <td>2.3</td> <td>-3.7</td> <td>-7.3</td> <td>7.7</td> <td>-2.6</td> <td>-1.1</td> <td>25.5</td> </tr> <tr> <td></td> <td>y7-NH3</td> <td>15.4</td> </tr> </tbody> </table> |        |         |        |                  |                |                      |                                 |                            |                             |                    |         |             |                   |                                                                                     | Fragment-ion (m/z) | 70.066  | 72.078  | 84.045  | 84.081  | 86.096  | 87.053  | 90.095  | 112.085 | 120.081 | 158.091 | 175.119 | 229.624 | 246.158 | 247.159 | 285.162 | 300.166 | 361.180 | 413.228 | 458.234 | 542.265 | 599.295 | 718.362 | 746.358 | 763.393 | Frac. Inten. (% of TIC) | 0.00 | 2.45 | 0.15 | 0.71 | 6.14 | 0.08 | 8.22 | 0.08 | 0.78 | 2.44 | 6.46 | 4.11 | 18.24 | 3.74 | 2.72 | 2.90 | 5.86 | 3.92 | 8.91 | 4.38 | 3.26 | 4.16 | 4.48 | 5.79 | Rel. Inten. (% of BP) | 0.00 | 13.45 | 0.82 | 3.89 | 33.64 | 0.45 | 45.04 | 0.45 | 4.30 | 13.39 | 35.38 | 22.50 | 100.00 | 20.51 | 14.88 | 15.92 | 32.12 | 21.48 | 48.84 | 24.03 | 17.88 | 22.81 | 24.57 | 31.74 | Score | 0.20 | -0.13 | 1.00 | 0.50 | -0.34 | 0.33 | -0.45 | 0.33 | 1.00 | 0.50 | 1.50 | 1.50 | 1.50 | -0.21 | 0.50 | 0.75 | 1.50 | 0.50 | 1.50 | 0.50 | 0.50 | 0.50 | 0.50 | 1.50 | Ion-type | PR |  | E | KQ |  | NR |  | R | F | y1-NH3 | y1 | y++4 | y2 |  | b2 | KG | y3 | b3 | y4 | b4 | b5 | ag | bg | y7 | Delta ppm | 8.2 |  | 6.1 | -2.1 |  | -30.9 |  | -16.3 | 0.2 | -8.2 | 2.6 | 11.2 | 6.6 |  | -21.6 | -6.8 | -7.8 | 2.3 | -3.7 | -7.3 | 7.7 | -2.6 | -1.1 | 25.5 |  |  |  |  |  |  |  |  |  |  |  |  |  |  |  |  |  |  |  |  |  |  |  | y7-NH3 | 15.4 |
| Fragment-ion (m/z)                                                                                                                                                                                                                                                                                                                                                                                                                                                                                                                                                                                                                                                                                                                                                                                                                                                                                                                                                                                                                                                                                                                                                                                                                                                                                                                                                                                                                                                                                                                                                                                                                                                                                                                                                                                                                                                                                                                                                                                                                                                                                                                                                                                                                                                                                                                                                                                                                                                                                                                                                                                                                                                             | 70.066 | 72.078  | 84.045 | 84.081           | 86.096         | 87.053               | 90.095                          | 112.085                    | 120.081                     | 158.091            | 175.119 | 229.624     | 246.158           | 247.159                                                                             | 285.162            | 300.166 | 361.180 | 413.228 | 458.234 | 542.265 | 599.295 | 718.362 | 746.358 | 763.393 |         |         |         |         |         |         |         |         |         |         |         |         |         |         |         |                         |      |      |      |      |      |      |      |      |      |      |      |      |       |      |      |      |      |      |      |      |      |      |      |      |                       |      |       |      |      |       |      |       |      |      |       |       |       |        |       |       |       |       |       |       |       |       |       |       |       |       |      |       |      |      |       |      |       |      |      |      |      |      |      |       |      |      |      |      |      |      |      |      |      |      |          |    |  |   |    |  |    |  |   |   |        |    |      |    |  |    |    |    |    |    |    |    |    |    |    |           |     |  |     |      |  |       |  |       |     |      |     |      |     |  |       |      |      |     |      |      |     |      |      |      |  |  |  |  |  |  |  |  |  |  |  |  |  |  |  |  |  |  |  |  |  |  |  |        |      |
| Frac. Inten. (% of TIC)                                                                                                                                                                                                                                                                                                                                                                                                                                                                                                                                                                                                                                                                                                                                                                                                                                                                                                                                                                                                                                                                                                                                                                                                                                                                                                                                                                                                                                                                                                                                                                                                                                                                                                                                                                                                                                                                                                                                                                                                                                                                                                                                                                                                                                                                                                                                                                                                                                                                                                                                                                                                                                                        | 0.00   | 2.45    | 0.15   | 0.71             | 6.14           | 0.08                 | 8.22                            | 0.08                       | 0.78                        | 2.44               | 6.46    | 4.11        | 18.24             | 3.74                                                                                | 2.72               | 2.90    | 5.86    | 3.92    | 8.91    | 4.38    | 3.26    | 4.16    | 4.48    | 5.79    |         |         |         |         |         |         |         |         |         |         |         |         |         |         |         |                         |      |      |      |      |      |      |      |      |      |      |      |      |       |      |      |      |      |      |      |      |      |      |      |      |                       |      |       |      |      |       |      |       |      |      |       |       |       |        |       |       |       |       |       |       |       |       |       |       |       |       |      |       |      |      |       |      |       |      |      |      |      |      |      |       |      |      |      |      |      |      |      |      |      |      |          |    |  |   |    |  |    |  |   |   |        |    |      |    |  |    |    |    |    |    |    |    |    |    |    |           |     |  |     |      |  |       |  |       |     |      |     |      |     |  |       |      |      |     |      |      |     |      |      |      |  |  |  |  |  |  |  |  |  |  |  |  |  |  |  |  |  |  |  |  |  |  |  |        |      |
| Rel. Inten. (% of BP)                                                                                                                                                                                                                                                                                                                                                                                                                                                                                                                                                                                                                                                                                                                                                                                                                                                                                                                                                                                                                                                                                                                                                                                                                                                                                                                                                                                                                                                                                                                                                                                                                                                                                                                                                                                                                                                                                                                                                                                                                                                                                                                                                                                                                                                                                                                                                                                                                                                                                                                                                                                                                                                          | 0.00   | 13.45   | 0.82   | 3.89             | 33.64          | 0.45                 | 45.04                           | 0.45                       | 4.30                        | 13.39              | 35.38   | 22.50       | 100.00            | 20.51                                                                               | 14.88              | 15.92   | 32.12   | 21.48   | 48.84   | 24.03   | 17.88   | 22.81   | 24.57   | 31.74   |         |         |         |         |         |         |         |         |         |         |         |         |         |         |         |                         |      |      |      |      |      |      |      |      |      |      |      |      |       |      |      |      |      |      |      |      |      |      |      |      |                       |      |       |      |      |       |      |       |      |      |       |       |       |        |       |       |       |       |       |       |       |       |       |       |       |       |      |       |      |      |       |      |       |      |      |      |      |      |      |       |      |      |      |      |      |      |      |      |      |      |          |    |  |   |    |  |    |  |   |   |        |    |      |    |  |    |    |    |    |    |    |    |    |    |    |           |     |  |     |      |  |       |  |       |     |      |     |      |     |  |       |      |      |     |      |      |     |      |      |      |  |  |  |  |  |  |  |  |  |  |  |  |  |  |  |  |  |  |  |  |  |  |  |        |      |
| Score                                                                                                                                                                                                                                                                                                                                                                                                                                                                                                                                                                                                                                                                                                                                                                                                                                                                                                                                                                                                                                                                                                                                                                                                                                                                                                                                                                                                                                                                                                                                                                                                                                                                                                                                                                                                                                                                                                                                                                                                                                                                                                                                                                                                                                                                                                                                                                                                                                                                                                                                                                                                                                                                          | 0.20   | -0.13   | 1.00   | 0.50             | -0.34          | 0.33                 | -0.45                           | 0.33                       | 1.00                        | 0.50               | 1.50    | 1.50        | 1.50              | -0.21                                                                               | 0.50               | 0.75    | 1.50    | 0.50    | 1.50    | 0.50    | 0.50    | 0.50    | 0.50    | 1.50    |         |         |         |         |         |         |         |         |         |         |         |         |         |         |         |                         |      |      |      |      |      |      |      |      |      |      |      |      |       |      |      |      |      |      |      |      |      |      |      |      |                       |      |       |      |      |       |      |       |      |      |       |       |       |        |       |       |       |       |       |       |       |       |       |       |       |       |      |       |      |      |       |      |       |      |      |      |      |      |      |       |      |      |      |      |      |      |      |      |      |      |          |    |  |   |    |  |    |  |   |   |        |    |      |    |  |    |    |    |    |    |    |    |    |    |    |           |     |  |     |      |  |       |  |       |     |      |     |      |     |  |       |      |      |     |      |      |     |      |      |      |  |  |  |  |  |  |  |  |  |  |  |  |  |  |  |  |  |  |  |  |  |  |  |        |      |
| Ion-type                                                                                                                                                                                                                                                                                                                                                                                                                                                                                                                                                                                                                                                                                                                                                                                                                                                                                                                                                                                                                                                                                                                                                                                                                                                                                                                                                                                                                                                                                                                                                                                                                                                                                                                                                                                                                                                                                                                                                                                                                                                                                                                                                                                                                                                                                                                                                                                                                                                                                                                                                                                                                                                                       | PR     |         | E      | KQ               |                | NR                   |                                 | R                          | F                           | y1-NH3             | y1      | y++4        | y2                |                                                                                     | b2                 | KG      | y3      | b3      | y4      | b4      | b5      | ag      | bg      | y7      |         |         |         |         |         |         |         |         |         |         |         |         |         |         |         |                         |      |      |      |      |      |      |      |      |      |      |      |      |       |      |      |      |      |      |      |      |      |      |      |      |                       |      |       |      |      |       |      |       |      |      |       |       |       |        |       |       |       |       |       |       |       |       |       |       |       |       |      |       |      |      |       |      |       |      |      |      |      |      |      |       |      |      |      |      |      |      |      |      |      |      |          |    |  |   |    |  |    |  |   |   |        |    |      |    |  |    |    |    |    |    |    |    |    |    |    |           |     |  |     |      |  |       |  |       |     |      |     |      |     |  |       |      |      |     |      |      |     |      |      |      |  |  |  |  |  |  |  |  |  |  |  |  |  |  |  |  |  |  |  |  |  |  |  |        |      |
| Delta ppm                                                                                                                                                                                                                                                                                                                                                                                                                                                                                                                                                                                                                                                                                                                                                                                                                                                                                                                                                                                                                                                                                                                                                                                                                                                                                                                                                                                                                                                                                                                                                                                                                                                                                                                                                                                                                                                                                                                                                                                                                                                                                                                                                                                                                                                                                                                                                                                                                                                                                                                                                                                                                                                                      | 8.2    |         | 6.1    | -2.1             |                | -30.9                |                                 | -16.3                      | 0.2                         | -8.2               | 2.6     | 11.2        | 6.6               |                                                                                     | -21.6              | -6.8    | -7.8    | 2.3     | -3.7    | -7.3    | 7.7     | -2.6    | -1.1    | 25.5    |         |         |         |         |         |         |         |         |         |         |         |         |         |         |         |                         |      |      |      |      |      |      |      |      |      |      |      |      |       |      |      |      |      |      |      |      |      |      |      |      |                       |      |       |      |      |       |      |       |      |      |       |       |       |        |       |       |       |       |       |       |       |       |       |       |       |       |      |       |      |      |       |      |       |      |      |      |      |      |      |       |      |      |      |      |      |      |      |      |      |      |          |    |  |   |    |  |    |  |   |   |        |    |      |    |  |    |    |    |    |    |    |    |    |    |    |           |     |  |     |      |  |       |  |       |     |      |     |      |     |  |       |      |      |     |      |      |     |      |      |      |  |  |  |  |  |  |  |  |  |  |  |  |  |  |  |  |  |  |  |  |  |  |  |        |      |
|                                                                                                                                                                                                                                                                                                                                                                                                                                                                                                                                                                                                                                                                                                                                                                                                                                                                                                                                                                                                                                                                                                                                                                                                                                                                                                                                                                                                                                                                                                                                                                                                                                                                                                                                                                                                                                                                                                                                                                                                                                                                                                                                                                                                                                                                                                                                                                                                                                                                                                                                                                                                                                                                                |        |         |        |                  |                |                      |                                 |                            |                             |                    |         |             |                   |                                                                                     |                    |         |         |         |         |         |         |         | y7-NH3  | 15.4    |         |         |         |         |         |         |         |         |         |         |         |         |         |         |         |                         |      |      |      |      |      |      |      |      |      |      |      |      |       |      |      |      |      |      |      |      |      |      |      |      |                       |      |       |      |      |       |      |       |      |      |       |       |       |        |       |       |       |       |       |       |       |       |       |       |       |       |      |       |      |      |       |      |       |      |      |      |      |      |      |       |      |      |      |      |      |      |      |      |      |      |          |    |  |   |    |  |    |  |   |   |        |    |      |    |  |    |    |    |    |    |    |    |    |    |    |           |     |  |     |      |  |       |  |       |     |      |     |      |     |  |       |      |      |     |      |      |     |      |      |      |  |  |  |  |  |  |  |  |  |  |  |  |  |  |  |  |  |  |  |  |  |  |  |        |      |

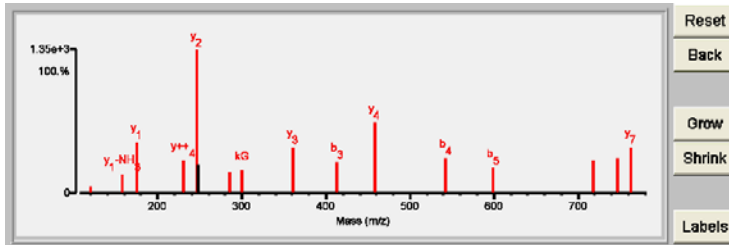

Reset  
Back  
Grow  
Shrink  
Labels

Result Summary

| Rank | Score | SPI (%) | BCS | # Unmatched Ions | Variable sites | Sequence           | MH <sup>+</sup> Calculated (Da) | MH <sup>+</sup> Error (Da) | MH <sup>+</sup> Error (ppm) | Protein MW/pl (Da) | Species | Accession # | Protein Name                                                                        |
|------|-------|---------|-----|------------------|----------------|--------------------|---------------------------------|----------------------------|-----------------------------|--------------------|---------|-------------|-------------------------------------------------------------------------------------|
| 1    | 14.23 | 78.5    | 4   | 8/25             | K467k          | (R)AAPGAEFAPNKR(R) | 1228.6433                       | 114.0484                   | 4.0                         | 54231.9/9.01       | HUMAN   | Q15233      | Non-POU domain-containing octamer-binding protein OS=Homo sapiens GN=NONO PE=1 SV=4 |

Detailed Results

| Rank | Score | SPI (%) | BCS | # Unmatched Ions | Variable sites | Sequence                       | MH <sup>+</sup> Calculated (Da) | MH <sup>+</sup> Error (Da) | MH <sup>+</sup> Error (ppm) | Protein MW/pl (Da) | Species | Accession # | MS-Digest Index # | Protein Name                                                                        |
|------|-------|---------|-----|------------------|----------------|--------------------------------|---------------------------------|----------------------------|-----------------------------|--------------------|---------|-------------|-------------------|-------------------------------------------------------------------------------------|
| 1    | 14.23 | 78.5    | 4   | 8/25             | K467k          | (R)A A P G A E F A P N K R (R) | 1228.6433                       | 114.0484                   | 4.0                         | 54231.9/9.01       | HUMAN   | Q15233      | 447819            | Non-POU domain-containing octamer-binding protein OS=Homo sapiens GN=NONO PE=1 SV=4 |

  

| Fragment-ion (m/z)      | 70.065 | 84.082 | 115.086        | 120.079 | 127.087 | 143.080        | 155.080 | 175.117        | 226.116 | 286.169 | 309.155 | 314.678          | 315.188 | 327.165 | 348.157 | 355.160 | 400.861 <sup>+3</sup>         | 456.201 | 474.274 | 502.230 | 513.273 | 531.294        | 571.319 | 600.802 <sup>+2</sup>         | 628.353        |
|-------------------------|--------|--------|----------------|---------|---------|----------------|---------|----------------|---------|---------|---------|------------------|---------|---------|---------|---------|-------------------------------|---------|---------|---------|---------|----------------|---------|-------------------------------|----------------|
| Frac. Inten. (% of TIC) | 0.00   | 2.75   | 7.62           | 0.18    | 2.71    | 4.54           | 6.88    | 3.97           | 4.41    | 2.83    | 2.79    | 6.86             | 1.82    | 3.20    | 2.27    | 7.94    | 2.61                          | 1.74    | 2.81    | 4.76    | 2.53    | 3.29           | 4.19    | 4.80                          | 12.51          |
| Rel. Inten. (% of BP)   | 0.00   | 21.98  | 60.92          | 1.46    | 21.62   | 36.28          | 54.99   | 31.74          | 35.23   | 22.60   | 22.26   | 54.78            | 14.58   | 25.58   | 18.12   | 63.41   | 20.85                         | 13.88   | 22.48   | 38.05   | 20.22   | 26.26          | 33.52   | 38.34                         | 100.00         |
| Score                   | 0.20   | -0.22  | 0.50           | 1.00    | 0.50    | 0.50           | 0.75    | 1.50           | 0.75    | -0.23   | -0.22   | 1.50             | -0.15   | 0.50    | 0.75    | 0.75    | 1.50                          | -0.14   | -0.22   | 0.75    | -0.20   | 1.50           | -0.34   | 1.50                          | 1.50           |
| Ion-type                | PR     |        | a <sub>2</sub> | F       | PG-28   | b <sub>2</sub> | PG      | y <sub>1</sub> | PGA     |         |         | y <sup>++4</sup> |         | PGAE-28 | EFA     | PGAE    | y <sub>10</sub> <sup>+3</sup> |         |         | PGAEF   |         | y <sub>3</sub> |         | y <sub>10</sub> <sup>+2</sup> | y <sub>4</sub> |
| Delta ppm               | -6.1   |        | -15.5          | -15.6   | -5.4    | -18.2          | -17.4   | -11.1          | -15.5   |         |         | -5.7             |         | -7.0    | 1.2     | -6.8    | -36.5                         |         |         | -1.2    |         | -11.0          |         | -13.6                         | 1.1            |

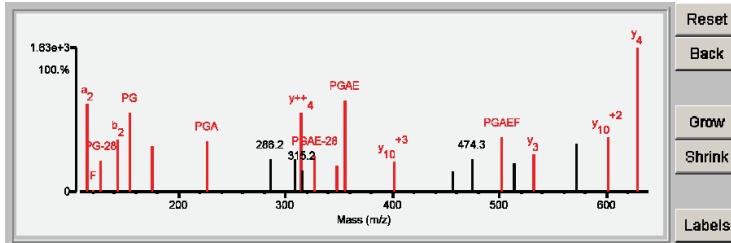



Result Summary

| Rank | Score | SPI (%) | BCS | # Unmatched Ions | Variable sites | Sequence                   | MH <sup>+</sup> Calculated (Da) | MH <sup>+</sup> Error (Da) | MH <sup>+</sup> Error (ppm) | Protein MW pI (Da) | Species | Accession # | Protein Name                                                            |
|------|-------|---------|-----|------------------|----------------|----------------------------|---------------------------------|----------------------------|-----------------------------|--------------------|---------|-------------|-------------------------------------------------------------------------|
| 1    | 13.04 | 82.0    | 7   | 9/25             | K1548k         | (R)TLQSLLPQPPLLKALYYESK(M) | 2504.4011                       | 114.0523                   | 3.6                         | 227921.8/5.83      | HUMAN   | Q92621      | Nuclear pore complex protein Nup205 OS=Homo sapiens GN=NUP205 PE=1 SV=2 |
| 2    | 11.45 | 80.3    | 6   | 10/25            | K1556k         | (R)TLQSLLPQPPLLKALYYESK(M) | 2504.4011                       | 114.0523                   | 3.6                         | 227921.8/5.83      | HUMAN   | Q92621      | Nuclear pore complex protein Nup205 OS=Homo sapiens GN=NUP205 PE=1 SV=2 |

Detailed Results

| Rank                                                                                                                                                                                                                                                                                                                                                                                                                                                                                                                                                                                                                                                                                                                                                                                                                                                                                                                                                                                                                                                                                                                                                                                                                                                                                                                                                                                                                                                                                                                                                                                                                                                                                                                                                                                                                                                                                                                                                                                                                                                                                                                                                                                                                                                                                                                                                                                                                                                                                                                                                                                                                                                                                                                                                                                                                                                                                                                                                                                                                                      | Score  | SPI (%) | BCS     | # Unmatched Ions | Variable sites | Sequence                                                         | MH <sup>+</sup> Calculated (Da) | MH <sup>+</sup> Error (Da) | MH <sup>+</sup> Error (ppm) | Protein MW pI (Da) | Species             | Accession #         | MS-Digest Index #     | Protein Name                                                            |                    |                                    |                       |                       |                   |                       |                   |                       |                                   |                        |                        |         |         |                       |         |         |                       |                       |                       |         |                       |         |                       |                        |                        |                        |                         |      |      |      |      |      |      |      |      |      |      |      |      |      |      |      |      |      |       |      |       |      |       |      |      |      |                       |      |      |       |       |      |       |       |       |      |      |       |       |       |      |      |       |       |        |       |       |      |       |       |       |       |       |      |      |      |      |      |      |       |       |       |      |      |      |       |       |       |       |      |      |       |      |      |      |       |      |      |          |    |    |    |    |    |    |  |  |  |    |                     |                     |  |  |  |                                    |                   |  |                   |  |                   |  |                                   |                   |           |       |       |       |      |      |     |  |  |  |      |       |       |  |  |  |  |       |      |  |      |      |     |  |       |     |  |  |  |       |    |  |  |  |  |  |  |  |  |  |  |  |  |  |  |  |  |  |  |  |  |                   |
|-------------------------------------------------------------------------------------------------------------------------------------------------------------------------------------------------------------------------------------------------------------------------------------------------------------------------------------------------------------------------------------------------------------------------------------------------------------------------------------------------------------------------------------------------------------------------------------------------------------------------------------------------------------------------------------------------------------------------------------------------------------------------------------------------------------------------------------------------------------------------------------------------------------------------------------------------------------------------------------------------------------------------------------------------------------------------------------------------------------------------------------------------------------------------------------------------------------------------------------------------------------------------------------------------------------------------------------------------------------------------------------------------------------------------------------------------------------------------------------------------------------------------------------------------------------------------------------------------------------------------------------------------------------------------------------------------------------------------------------------------------------------------------------------------------------------------------------------------------------------------------------------------------------------------------------------------------------------------------------------------------------------------------------------------------------------------------------------------------------------------------------------------------------------------------------------------------------------------------------------------------------------------------------------------------------------------------------------------------------------------------------------------------------------------------------------------------------------------------------------------------------------------------------------------------------------------------------------------------------------------------------------------------------------------------------------------------------------------------------------------------------------------------------------------------------------------------------------------------------------------------------------------------------------------------------------------------------------------------------------------------------------------------------------|--------|---------|---------|------------------|----------------|------------------------------------------------------------------|---------------------------------|----------------------------|-----------------------------|--------------------|---------------------|---------------------|-----------------------|-------------------------------------------------------------------------|--------------------|------------------------------------|-----------------------|-----------------------|-------------------|-----------------------|-------------------|-----------------------|-----------------------------------|------------------------|------------------------|---------|---------|-----------------------|---------|---------|-----------------------|-----------------------|-----------------------|---------|-----------------------|---------|-----------------------|------------------------|------------------------|------------------------|-------------------------|------|------|------|------|------|------|------|------|------|------|------|------|------|------|------|------|------|-------|------|-------|------|-------|------|------|------|-----------------------|------|------|-------|-------|------|-------|-------|-------|------|------|-------|-------|-------|------|------|-------|-------|--------|-------|-------|------|-------|-------|-------|-------|-------|------|------|------|------|------|------|-------|-------|-------|------|------|------|-------|-------|-------|-------|------|------|-------|------|------|------|-------|------|------|----------|----|----|----|----|----|----|--|--|--|----|---------------------|---------------------|--|--|--|------------------------------------|-------------------|--|-------------------|--|-------------------|--|-----------------------------------|-------------------|-----------|-------|-------|-------|------|------|-----|--|--|--|------|-------|-------|--|--|--|--|-------|------|--|------|------|-----|--|-------|-----|--|--|--|-------|----|--|--|--|--|--|--|--|--|--|--|--|--|--|--|--|--|--|--|--|--|-------------------|
| 1                                                                                                                                                                                                                                                                                                                                                                                                                                                                                                                                                                                                                                                                                                                                                                                                                                                                                                                                                                                                                                                                                                                                                                                                                                                                                                                                                                                                                                                                                                                                                                                                                                                                                                                                                                                                                                                                                                                                                                                                                                                                                                                                                                                                                                                                                                                                                                                                                                                                                                                                                                                                                                                                                                                                                                                                                                                                                                                                                                                                                                         | 13.04  | 82.0    | 7       | 9/25             | K1548k         | (R)T L I Q / S L / L / T / P Q / P P L L K / A L Y T Y E S K (M) | 2504.4011                       | 114.0523                   | 3.6                         | 227921.8/5.83      | HUMAN               | Q92621              | 456475                | Nuclear pore complex protein Nup205 OS=Homo sapiens GN=NUP205 PE=1 SV=2 |                    |                                    |                       |                       |                   |                       |                   |                       |                                   |                        |                        |         |         |                       |         |         |                       |                       |                       |         |                       |         |                       |                        |                        |                        |                         |      |      |      |      |      |      |      |      |      |      |      |      |      |      |      |      |      |       |      |       |      |       |      |      |      |                       |      |      |       |       |      |       |       |       |      |      |       |       |       |      |      |       |       |        |       |       |      |       |       |       |       |       |      |      |      |      |      |      |       |       |       |      |      |      |       |       |       |       |      |      |       |      |      |      |       |      |      |          |    |    |    |    |    |    |  |  |  |    |                     |                     |  |  |  |                                    |                   |  |                   |  |                   |  |                                   |                   |           |       |       |       |      |      |     |  |  |  |      |       |       |  |  |  |  |       |      |  |      |      |     |  |       |     |  |  |  |       |    |  |  |  |  |  |  |  |  |  |  |  |  |  |  |  |  |  |  |  |  |                   |
| <table border="1"> <thead> <tr> <th>Fragment-ion (m/z)</th> <th>86.095</th> <th>101.067</th> <th>187.141</th> <th>215.138</th> <th>216.106</th> <th>226.120</th> <th>284.161</th> <th>455.247</th> <th>508.281</th> <th>515.330</th> <th>525.298</th> <th>638.363</th> <th>665.851<sup>+2</sup></th> <th>722.414</th> <th>770.366</th> <th>790.372<sup>+3</sup></th> <th>796.095<sup>+3</sup></th> <th>818.946<sup>+2</sup></th> <th>822.534</th> <th>931.503<sup>+2</sup></th> <th>974.480</th> <th>982.034<sup>+2</sup></th> <th>1029.612<sup>+2</sup></th> <th>1038.566<sup>+2</sup></th> <th>1138.633<sup>+2</sup></th> </tr> </thead> <tbody> <tr> <td>Frac. Inten. (% of TIC)</td> <td>0.09</td> <td>0.10</td> <td>5.12</td> <td>2.13</td> <td>1.69</td> <td>3.49</td> <td>2.10</td> <td>2.14</td> <td>1.49</td> <td>1.54</td> <td>2.15</td> <td>2.04</td> <td>2.14</td> <td>1.78</td> <td>1.58</td> <td>2.20</td> <td>3.24</td> <td>19.33</td> <td>2.47</td> <td>17.46</td> <td>1.73</td> <td>10.30</td> <td>2.08</td> <td>7.14</td> <td>4.45</td> </tr> <tr> <td>Rel. Inten. (% of BP)</td> <td>0.47</td> <td>0.51</td> <td>26.49</td> <td>11.00</td> <td>8.76</td> <td>18.04</td> <td>10.86</td> <td>11.07</td> <td>7.70</td> <td>7.97</td> <td>11.13</td> <td>10.57</td> <td>11.05</td> <td>9.21</td> <td>8.19</td> <td>11.40</td> <td>16.78</td> <td>100.00</td> <td>12.78</td> <td>90.31</td> <td>8.93</td> <td>53.28</td> <td>10.76</td> <td>36.95</td> <td>23.03</td> </tr> <tr> <td>Score</td> <td>0.22</td> <td>0.50</td> <td>0.50</td> <td>0.75</td> <td>0.75</td> <td>0.75</td> <td>-0.11</td> <td>-0.11</td> <td>-0.08</td> <td>0.50</td> <td>0.25</td> <td>0.25</td> <td>-0.11</td> <td>-0.09</td> <td>-0.08</td> <td>-0.11</td> <td>0.50</td> <td>1.50</td> <td>-0.13</td> <td>1.50</td> <td>1.50</td> <td>1.50</td> <td>-0.11</td> <td>1.50</td> <td>1.50</td> </tr> <tr> <td>Ion-type</td> <td>LI</td> <td>QK</td> <td>a2</td> <td>b2</td> <td>QS</td> <td>QP</td> <td></td> <td></td> <td></td> <td>a5</td> <td>b5-H<sub>2</sub>O</td> <td>b6-H<sub>2</sub>O</td> <td></td> <td></td> <td></td> <td>y20-H<sub>2</sub>O<sup>+3</sup></td> <td>y13<sup>+2</sup></td> <td></td> <td>y15<sup>+2</sup></td> <td></td> <td>y16<sup>+2</sup></td> <td></td> <td>b18-NH<sub>3</sub><sup>+2</sup></td> <td>y19<sup>+2</sup></td> </tr> <tr> <td>Delta ppm</td> <td>-17.7</td> <td>-37.0</td> <td>-20.8</td> <td>-9.4</td> <td>33.4</td> <td>3.5</td> <td></td> <td></td> <td></td> <td>19.3</td> <td>-12.4</td> <td>-39.1</td> <td></td> <td></td> <td></td> <td></td> <td>-12.7</td> <td>-5.6</td> <td></td> <td>-3.6</td> <td>-3.2</td> <td>3.3</td> <td></td> <td>-24.2</td> <td>1.9</td> </tr> <tr> <td></td> <td></td> <td></td> <td>LT-28</td> <td>LT</td> <td></td> <td>y17<sup>+2</sup></td> </tr> </tbody> </table> |        |         |         |                  |                |                                                                  |                                 |                            |                             |                    |                     |                     |                       |                                                                         | Fragment-ion (m/z) | 86.095                             | 101.067               | 187.141               | 215.138           | 216.106               | 226.120           | 284.161               | 455.247                           | 508.281                | 515.330                | 525.298 | 638.363 | 665.851 <sup>+2</sup> | 722.414 | 770.366 | 790.372 <sup>+3</sup> | 796.095 <sup>+3</sup> | 818.946 <sup>+2</sup> | 822.534 | 931.503 <sup>+2</sup> | 974.480 | 982.034 <sup>+2</sup> | 1029.612 <sup>+2</sup> | 1038.566 <sup>+2</sup> | 1138.633 <sup>+2</sup> | Frac. Inten. (% of TIC) | 0.09 | 0.10 | 5.12 | 2.13 | 1.69 | 3.49 | 2.10 | 2.14 | 1.49 | 1.54 | 2.15 | 2.04 | 2.14 | 1.78 | 1.58 | 2.20 | 3.24 | 19.33 | 2.47 | 17.46 | 1.73 | 10.30 | 2.08 | 7.14 | 4.45 | Rel. Inten. (% of BP) | 0.47 | 0.51 | 26.49 | 11.00 | 8.76 | 18.04 | 10.86 | 11.07 | 7.70 | 7.97 | 11.13 | 10.57 | 11.05 | 9.21 | 8.19 | 11.40 | 16.78 | 100.00 | 12.78 | 90.31 | 8.93 | 53.28 | 10.76 | 36.95 | 23.03 | Score | 0.22 | 0.50 | 0.50 | 0.75 | 0.75 | 0.75 | -0.11 | -0.11 | -0.08 | 0.50 | 0.25 | 0.25 | -0.11 | -0.09 | -0.08 | -0.11 | 0.50 | 1.50 | -0.13 | 1.50 | 1.50 | 1.50 | -0.11 | 1.50 | 1.50 | Ion-type | LI | QK | a2 | b2 | QS | QP |  |  |  | a5 | b5-H <sub>2</sub> O | b6-H <sub>2</sub> O |  |  |  | y20-H <sub>2</sub> O <sup>+3</sup> | y13 <sup>+2</sup> |  | y15 <sup>+2</sup> |  | y16 <sup>+2</sup> |  | b18-NH <sub>3</sub> <sup>+2</sup> | y19 <sup>+2</sup> | Delta ppm | -17.7 | -37.0 | -20.8 | -9.4 | 33.4 | 3.5 |  |  |  | 19.3 | -12.4 | -39.1 |  |  |  |  | -12.7 | -5.6 |  | -3.6 | -3.2 | 3.3 |  | -24.2 | 1.9 |  |  |  | LT-28 | LT |  |  |  |  |  |  |  |  |  |  |  |  |  |  |  |  |  |  |  |  | y17 <sup>+2</sup> |
| Fragment-ion (m/z)                                                                                                                                                                                                                                                                                                                                                                                                                                                                                                                                                                                                                                                                                                                                                                                                                                                                                                                                                                                                                                                                                                                                                                                                                                                                                                                                                                                                                                                                                                                                                                                                                                                                                                                                                                                                                                                                                                                                                                                                                                                                                                                                                                                                                                                                                                                                                                                                                                                                                                                                                                                                                                                                                                                                                                                                                                                                                                                                                                                                                        | 86.095 | 101.067 | 187.141 | 215.138          | 216.106        | 226.120                                                          | 284.161                         | 455.247                    | 508.281                     | 515.330            | 525.298             | 638.363             | 665.851 <sup>+2</sup> | 722.414                                                                 | 770.366            | 790.372 <sup>+3</sup>              | 796.095 <sup>+3</sup> | 818.946 <sup>+2</sup> | 822.534           | 931.503 <sup>+2</sup> | 974.480           | 982.034 <sup>+2</sup> | 1029.612 <sup>+2</sup>            | 1038.566 <sup>+2</sup> | 1138.633 <sup>+2</sup> |         |         |                       |         |         |                       |                       |                       |         |                       |         |                       |                        |                        |                        |                         |      |      |      |      |      |      |      |      |      |      |      |      |      |      |      |      |      |       |      |       |      |       |      |      |      |                       |      |      |       |       |      |       |       |       |      |      |       |       |       |      |      |       |       |        |       |       |      |       |       |       |       |       |      |      |      |      |      |      |       |       |       |      |      |      |       |       |       |       |      |      |       |      |      |      |       |      |      |          |    |    |    |    |    |    |  |  |  |    |                     |                     |  |  |  |                                    |                   |  |                   |  |                   |  |                                   |                   |           |       |       |       |      |      |     |  |  |  |      |       |       |  |  |  |  |       |      |  |      |      |     |  |       |     |  |  |  |       |    |  |  |  |  |  |  |  |  |  |  |  |  |  |  |  |  |  |  |  |  |                   |
| Frac. Inten. (% of TIC)                                                                                                                                                                                                                                                                                                                                                                                                                                                                                                                                                                                                                                                                                                                                                                                                                                                                                                                                                                                                                                                                                                                                                                                                                                                                                                                                                                                                                                                                                                                                                                                                                                                                                                                                                                                                                                                                                                                                                                                                                                                                                                                                                                                                                                                                                                                                                                                                                                                                                                                                                                                                                                                                                                                                                                                                                                                                                                                                                                                                                   | 0.09   | 0.10    | 5.12    | 2.13             | 1.69           | 3.49                                                             | 2.10                            | 2.14                       | 1.49                        | 1.54               | 2.15                | 2.04                | 2.14                  | 1.78                                                                    | 1.58               | 2.20                               | 3.24                  | 19.33                 | 2.47              | 17.46                 | 1.73              | 10.30                 | 2.08                              | 7.14                   | 4.45                   |         |         |                       |         |         |                       |                       |                       |         |                       |         |                       |                        |                        |                        |                         |      |      |      |      |      |      |      |      |      |      |      |      |      |      |      |      |      |       |      |       |      |       |      |      |      |                       |      |      |       |       |      |       |       |       |      |      |       |       |       |      |      |       |       |        |       |       |      |       |       |       |       |       |      |      |      |      |      |      |       |       |       |      |      |      |       |       |       |       |      |      |       |      |      |      |       |      |      |          |    |    |    |    |    |    |  |  |  |    |                     |                     |  |  |  |                                    |                   |  |                   |  |                   |  |                                   |                   |           |       |       |       |      |      |     |  |  |  |      |       |       |  |  |  |  |       |      |  |      |      |     |  |       |     |  |  |  |       |    |  |  |  |  |  |  |  |  |  |  |  |  |  |  |  |  |  |  |  |  |                   |
| Rel. Inten. (% of BP)                                                                                                                                                                                                                                                                                                                                                                                                                                                                                                                                                                                                                                                                                                                                                                                                                                                                                                                                                                                                                                                                                                                                                                                                                                                                                                                                                                                                                                                                                                                                                                                                                                                                                                                                                                                                                                                                                                                                                                                                                                                                                                                                                                                                                                                                                                                                                                                                                                                                                                                                                                                                                                                                                                                                                                                                                                                                                                                                                                                                                     | 0.47   | 0.51    | 26.49   | 11.00            | 8.76           | 18.04                                                            | 10.86                           | 11.07                      | 7.70                        | 7.97               | 11.13               | 10.57               | 11.05                 | 9.21                                                                    | 8.19               | 11.40                              | 16.78                 | 100.00                | 12.78             | 90.31                 | 8.93              | 53.28                 | 10.76                             | 36.95                  | 23.03                  |         |         |                       |         |         |                       |                       |                       |         |                       |         |                       |                        |                        |                        |                         |      |      |      |      |      |      |      |      |      |      |      |      |      |      |      |      |      |       |      |       |      |       |      |      |      |                       |      |      |       |       |      |       |       |       |      |      |       |       |       |      |      |       |       |        |       |       |      |       |       |       |       |       |      |      |      |      |      |      |       |       |       |      |      |      |       |       |       |       |      |      |       |      |      |      |       |      |      |          |    |    |    |    |    |    |  |  |  |    |                     |                     |  |  |  |                                    |                   |  |                   |  |                   |  |                                   |                   |           |       |       |       |      |      |     |  |  |  |      |       |       |  |  |  |  |       |      |  |      |      |     |  |       |     |  |  |  |       |    |  |  |  |  |  |  |  |  |  |  |  |  |  |  |  |  |  |  |  |  |                   |
| Score                                                                                                                                                                                                                                                                                                                                                                                                                                                                                                                                                                                                                                                                                                                                                                                                                                                                                                                                                                                                                                                                                                                                                                                                                                                                                                                                                                                                                                                                                                                                                                                                                                                                                                                                                                                                                                                                                                                                                                                                                                                                                                                                                                                                                                                                                                                                                                                                                                                                                                                                                                                                                                                                                                                                                                                                                                                                                                                                                                                                                                     | 0.22   | 0.50    | 0.50    | 0.75             | 0.75           | 0.75                                                             | -0.11                           | -0.11                      | -0.08                       | 0.50               | 0.25                | 0.25                | -0.11                 | -0.09                                                                   | -0.08              | -0.11                              | 0.50                  | 1.50                  | -0.13             | 1.50                  | 1.50              | 1.50                  | -0.11                             | 1.50                   | 1.50                   |         |         |                       |         |         |                       |                       |                       |         |                       |         |                       |                        |                        |                        |                         |      |      |      |      |      |      |      |      |      |      |      |      |      |      |      |      |      |       |      |       |      |       |      |      |      |                       |      |      |       |       |      |       |       |       |      |      |       |       |       |      |      |       |       |        |       |       |      |       |       |       |       |       |      |      |      |      |      |      |       |       |       |      |      |      |       |       |       |       |      |      |       |      |      |      |       |      |      |          |    |    |    |    |    |    |  |  |  |    |                     |                     |  |  |  |                                    |                   |  |                   |  |                   |  |                                   |                   |           |       |       |       |      |      |     |  |  |  |      |       |       |  |  |  |  |       |      |  |      |      |     |  |       |     |  |  |  |       |    |  |  |  |  |  |  |  |  |  |  |  |  |  |  |  |  |  |  |  |  |                   |
| Ion-type                                                                                                                                                                                                                                                                                                                                                                                                                                                                                                                                                                                                                                                                                                                                                                                                                                                                                                                                                                                                                                                                                                                                                                                                                                                                                                                                                                                                                                                                                                                                                                                                                                                                                                                                                                                                                                                                                                                                                                                                                                                                                                                                                                                                                                                                                                                                                                                                                                                                                                                                                                                                                                                                                                                                                                                                                                                                                                                                                                                                                                  | LI     | QK      | a2      | b2               | QS             | QP                                                               |                                 |                            |                             | a5                 | b5-H <sub>2</sub> O | b6-H <sub>2</sub> O |                       |                                                                         |                    | y20-H <sub>2</sub> O <sup>+3</sup> | y13 <sup>+2</sup>     |                       | y15 <sup>+2</sup> |                       | y16 <sup>+2</sup> |                       | b18-NH <sub>3</sub> <sup>+2</sup> | y19 <sup>+2</sup>      |                        |         |         |                       |         |         |                       |                       |                       |         |                       |         |                       |                        |                        |                        |                         |      |      |      |      |      |      |      |      |      |      |      |      |      |      |      |      |      |       |      |       |      |       |      |      |      |                       |      |      |       |       |      |       |       |       |      |      |       |       |       |      |      |       |       |        |       |       |      |       |       |       |       |       |      |      |      |      |      |      |       |       |       |      |      |      |       |       |       |       |      |      |       |      |      |      |       |      |      |          |    |    |    |    |    |    |  |  |  |    |                     |                     |  |  |  |                                    |                   |  |                   |  |                   |  |                                   |                   |           |       |       |       |      |      |     |  |  |  |      |       |       |  |  |  |  |       |      |  |      |      |     |  |       |     |  |  |  |       |    |  |  |  |  |  |  |  |  |  |  |  |  |  |  |  |  |  |  |  |  |                   |
| Delta ppm                                                                                                                                                                                                                                                                                                                                                                                                                                                                                                                                                                                                                                                                                                                                                                                                                                                                                                                                                                                                                                                                                                                                                                                                                                                                                                                                                                                                                                                                                                                                                                                                                                                                                                                                                                                                                                                                                                                                                                                                                                                                                                                                                                                                                                                                                                                                                                                                                                                                                                                                                                                                                                                                                                                                                                                                                                                                                                                                                                                                                                 | -17.7  | -37.0   | -20.8   | -9.4             | 33.4           | 3.5                                                              |                                 |                            |                             | 19.3               | -12.4               | -39.1               |                       |                                                                         |                    |                                    | -12.7                 | -5.6                  |                   | -3.6                  | -3.2              | 3.3                   |                                   | -24.2                  | 1.9                    |         |         |                       |         |         |                       |                       |                       |         |                       |         |                       |                        |                        |                        |                         |      |      |      |      |      |      |      |      |      |      |      |      |      |      |      |      |      |       |      |       |      |       |      |      |      |                       |      |      |       |       |      |       |       |       |      |      |       |       |       |      |      |       |       |        |       |       |      |       |       |       |       |       |      |      |      |      |      |      |       |       |       |      |      |      |       |       |       |       |      |      |       |      |      |      |       |      |      |          |    |    |    |    |    |    |  |  |  |    |                     |                     |  |  |  |                                    |                   |  |                   |  |                   |  |                                   |                   |           |       |       |       |      |      |     |  |  |  |      |       |       |  |  |  |  |       |      |  |      |      |     |  |       |     |  |  |  |       |    |  |  |  |  |  |  |  |  |  |  |  |  |  |  |  |  |  |  |  |  |                   |
|                                                                                                                                                                                                                                                                                                                                                                                                                                                                                                                                                                                                                                                                                                                                                                                                                                                                                                                                                                                                                                                                                                                                                                                                                                                                                                                                                                                                                                                                                                                                                                                                                                                                                                                                                                                                                                                                                                                                                                                                                                                                                                                                                                                                                                                                                                                                                                                                                                                                                                                                                                                                                                                                                                                                                                                                                                                                                                                                                                                                                                           |        |         | LT-28   | LT               |                |                                                                  |                                 |                            |                             |                    |                     |                     |                       |                                                                         |                    |                                    |                       |                       |                   |                       |                   |                       |                                   |                        | y17 <sup>+2</sup>      |         |         |                       |         |         |                       |                       |                       |         |                       |         |                       |                        |                        |                        |                         |      |      |      |      |      |      |      |      |      |      |      |      |      |      |      |      |      |       |      |       |      |       |      |      |      |                       |      |      |       |       |      |       |       |       |      |      |       |       |       |      |      |       |       |        |       |       |      |       |       |       |       |       |      |      |      |      |      |      |       |       |       |      |      |      |       |       |       |       |      |      |       |      |      |      |       |      |      |          |    |    |    |    |    |    |  |  |  |    |                     |                     |  |  |  |                                    |                   |  |                   |  |                   |  |                                   |                   |           |       |       |       |      |      |     |  |  |  |      |       |       |  |  |  |  |       |      |  |      |      |     |  |       |     |  |  |  |       |    |  |  |  |  |  |  |  |  |  |  |  |  |  |  |  |  |  |  |  |  |                   |

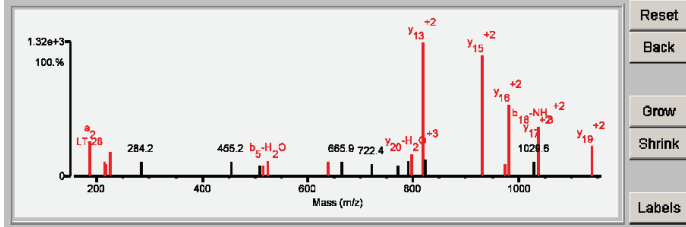

Result Summary

| Rank | Score | SPI (%) | BCS | # Unmatched ions | Variable sites | Sequence                          | MH <sup>+</sup> Calculated (Da) | MH <sup>+</sup> Error (Da) | MH <sup>+</sup> Error (ppm) | Protein MW/pi (Da) | Species | Accession # | Protein Name                                                                       |
|------|-------|---------|-----|------------------|----------------|-----------------------------------|---------------------------------|----------------------------|-----------------------------|--------------------|---------|-------------|------------------------------------------------------------------------------------|
| 1    | 16.97 | 78.8    | 9   | 6/25             | K302k          | (K)AEVVD <sup>E</sup> IAAKLGLR(K) | 1483.8479                       | 114.0526                   | 6.0                         | 68120.6/5.95       | HUMAN   | Q8TAT6      | Nuclear protein localization protein 4 homolog OS=Homo sapiens GN=NPLOC4 PE=1 SV=3 |

Detailed Results

| Rank | Score | SPI (%) | BCS | # Unmatched ions | Variable sites | Sequence                               | MH <sup>+</sup> Calculated (Da) | MH <sup>+</sup> Error (Da) | MH <sup>+</sup> Error (ppm) | Protein MW/pi (Da) | Species | Accession # | MS-Digest Index # | Protein Name                                                                       |
|------|-------|---------|-----|------------------|----------------|----------------------------------------|---------------------------------|----------------------------|-----------------------------|--------------------|---------|-------------|-------------------|------------------------------------------------------------------------------------|
| 1    | 16.97 | 78.8    | 9   | 6/25             | K302k          | (K)A E V V V D E I I A A K L G L R (K) | 1483.8479                       | 114.0526                   | 6.0                         | 68120.6/5.95       | HUMAN   | Q8TAT6      | 449479            | Nuclear protein localization protein 4 homolog OS=Homo sapiens GN=NPLOC4 PE=1 SV=3 |

  

| Fragment-ion (m/z)      | 72.081 | 84.045 | 84.078 | 86.095 | 102.054 | 110.062 | 155.083 | 171.147 | 173.090 | 174.096 | 175.119 | 201.086 | 245.076 | 300.152 | 314.175 | 344.147 | 358.161 <sup>+2</sup> | 385.218 | 458.308 | 600.343            | 700.440 | 771.485 | 842.520 | 955.604 | 1199.678 |
|-------------------------|--------|--------|--------|--------|---------|---------|---------|---------|---------|---------|---------|---------|---------|---------|---------|---------|-----------------------|---------|---------|--------------------|---------|---------|---------|---------|----------|
| Frac. Inten. (% of TIC) | 0.31   | 0.10   | 5.25   | 0.20   | 0.21    | 2.37    | 4.10    | 4.44    | 16.98   | 1.73    | 3.04    | 10.41   | 4.34    | 1.69    | 2.27    | 7.10    | 3.30                  | 2.36    | 5.38    | 2.27               | 2.63    | 4.63    | 9.19    | 3.13    | 2.57     |
| Rel. Inten. (% of BP)   | 1.81   | 0.61   | 30.90  | 1.16   | 1.24    | 13.96   | 24.13   | 26.17   | 100.00  | 10.21   | 17.92   | 61.32   | 25.55   | 9.95    | 13.37   | 41.79   | 19.43                 | 13.90   | 31.66   | 13.35              | 15.46   | 27.26   | 54.11   | 18.41   | 15.15    |
| Score                   | 0.50   |        | -0.31  | 0.22   | 1.00    | -0.14   | -0.24   | -0.26   | 0.50    | -0.10   | 1.50    | 0.50    | 0.75    | 0.50    | 0.75    | 0.75    | -0.19                 | 0.75    | 1.50    | 1.50               | 1.50    | 1.50    | 1.50    | 1.50    | 1.50     |
| Ion-type                | V      | E      |        | LI     | E       |         |         | a2      |         |         | y1      | b2      | DE      | b3      | Ak      | VDE     |                       | AAk     | y4      | y <sup>++</sup> 10 | y5      | y6      | y7      | y8      | y10      |
| Delta ppm               | -2.4   |        |        | -13.1  | -7.4    |         |         | -17.7   |         |         | -2.6    | -10.3   | -9.4    | -15.6   | -26.0   | 2.3     |                       | -6.2    | -1.6    | 4.2                | -8.8    | 2.4     | -0.3    | -0.4    | 3.3      |

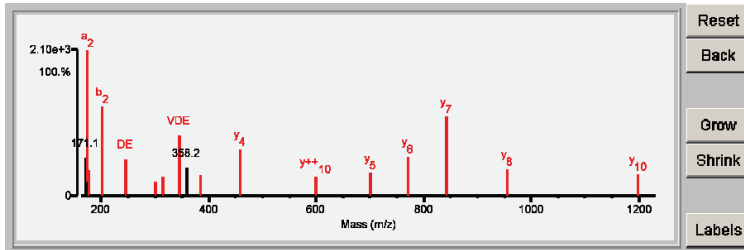

Result Summary

| Rank | Score | SPI (%) | BCS | # Unmatched Ions | Variable sites | Sequence             | MH <sup>+</sup> Calculated (Da) | MH <sup>+</sup> Error (Da) | MH <sup>+</sup> Error (ppm) | Protein MW/pi (Da) | Species | Accession # | Protein Name                                                  |
|------|-------|---------|-----|------------------|----------------|----------------------|---------------------------------|----------------------------|-----------------------------|--------------------|---------|-------------|---------------------------------------------------------------|
| 1    | 16.36 | 86.2    | 8   | 4/25             | K55k           | (K)AAIVEKLSLPPFQK(I) | 1530.8890                       | 114.0541                   | 6.8                         | 14478.6/5.10       | HUMAN   | P61970      | Nuclear transport factor 2 OS=Homo sapiens GN=NUTF2 PE=1 SV=1 |

Detailed Results

| Rank | Score | SPI (%) | BCS | # Unmatched Ions | Variable sites | Sequence                                           | MH <sup>+</sup> Calculated (Da) | MH <sup>+</sup> Error (Da) | MH <sup>+</sup> Error (ppm) | Protein MW/pi (Da) | Species | Accession # | MS-Digest Index # | Protein Name                                                  |
|------|-------|---------|-----|------------------|----------------|----------------------------------------------------|---------------------------------|----------------------------|-----------------------------|--------------------|---------|-------------|-------------------|---------------------------------------------------------------|
| 1    | 16.36 | 86.2    | 8   | 4/25             | K55k           | (K)A A I I V V E V k L / S / S L / P P F / Q K (I) | 1530.8890                       | 114.0541                   | 6.8                         | 14478.6/5.10       | HUMAN   | P61970      | 454919            | Nuclear transport factor 2 OS=Homo sapiens GN=NUTF2 PE=1 SV=1 |

  

| Fragment-ion (m/z)      | 70.065 | 84.080 | 86.096 | 115.089        | 120.080 | 129.103 | 136.074 | 185.161 | 213.158 | 217.135 | 245.125 | 256.167        | 275.171        | 355.232        | 372.185 <sup>+2</sup> | 442.297 | 471.260        | 484.262 | 500.255 | 519.294        | 695.393           | 697.418 | 719.421        | 806.441        | 919.513        |
|-------------------------|--------|--------|--------|----------------|---------|---------|---------|---------|---------|---------|---------|----------------|----------------|----------------|-----------------------|---------|----------------|---------|---------|----------------|-------------------|---------|----------------|----------------|----------------|
| Frac. Inten. (% of TIC) | 0.01   | 0.46   | 1.18   | 8.19           | 0.10    | 0.12    | 4.89    | 4.73    | 3.05    | 3.53    | 4.53    | 3.43           | 2.86           | 4.97           | 2.71                  | 3.02    | 3.00           | 3.89    | 3.22    | 18.07          | 7.84              | 2.82    | 3.14           | 4.37           | 5.87           |
| Rel. Inten. (% of BP)   | 0.05   | 2.56   | 6.54   | 45.32          | 0.57    | 0.68    | 27.05   | 26.19   | 16.90   | 19.55   | 25.05   | 18.96          | 15.82          | 27.49          | 15.01                 | 16.74   | 16.60          | 21.55   | 17.80   | 100.00         | 43.42             | 15.59   | 17.37          | 24.16          | 32.48          |
| Score                   | 0.20   | 0.50   | 0.22   | 0.50           | 1.00    | 0.20    | -0.27   | 0.50    | 0.75    | 0.50    | 0.75    | 0.50           | 1.50           | 0.50           | -0.15                 | -0.17   | 0.75           | 0.50    | -0.18   | 1.50           | 1.50              | 0.75    | 1.50           | 1.50           | 1.50           |
| Ion-type                | PR     | KQ     | LI     | a <sub>2</sub> | F       | RKQ     |         | IV-28   | IV      | PF-28   | PF      | b <sub>3</sub> | y <sub>2</sub> | b <sub>4</sub> |                       | VEk     | b <sub>5</sub> |         |         | y <sub>4</sub> | y <sup>++11</sup> | IVEkL   | y <sub>6</sub> | y <sub>7</sub> | y <sub>8</sub> |
| Delta ppm               | -1.8   | -12.8  | -10.8  | 7.9            | -10.6   | 5.9     |         | -25.6   | -12.9   | -0.6    | -17.3   | 1.3            | -0.3           | -9.2           |                       | 6.0     | -31.7          |         |         | 2.8            | 3.2               | -10.0   | 16.6           | 0.4            | -12.9          |

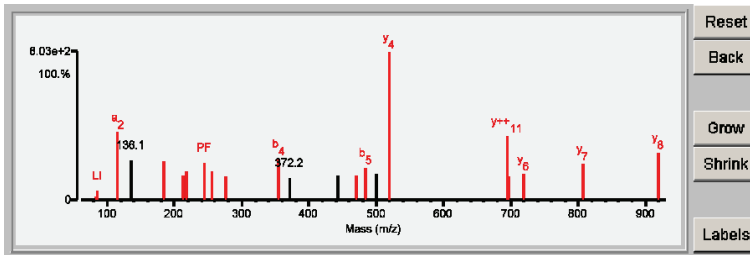

Result Summary

| Rank | Score | SPI (%) | BCS | # Unmatched Ions | Variable sites | Sequence                | MH <sup>+</sup> Calculated (Da) | MH <sup>+</sup> Error (Da) | MH <sup>+</sup> Error (ppm) | Protein MW/pl (Da) | Species | Accession # | Protein Name                                                              |
|------|-------|---------|-----|------------------|----------------|-------------------------|---------------------------------|----------------------------|-----------------------------|--------------------|---------|-------------|---------------------------------------------------------------------------|
| 1    | 14.95 | 82.1    | 9   | 4/25             | K56k           | (K)EHYVDLDRPFFAGLVK(Y)  | 2034.0807                       | 114.0410                   | -0.9                        | 17148.8/5.83       | HUMAN   | P15531      | Nucleoside diphosphate kinase A OS=Homo sapiens GN=NME1 PE=1 SV=1         |
| 2    | 7.86  | 67.7    | 1   | 9/25             | K97k           | (K)VLGAFFPRDKLDVYHEK(L) | 2034.0807                       | 114.0410                   | -0.9                        | 17148.8/5.83       | HUMAN   | RP15531     | REVERSE Nucleoside diphosphate kinase A OS=Homo sapiens GN=NME1 PE=1 SV=1 |
| 3    | 5.53  | 57.6    | 1   | 12/25            | M1063m         | (K)LLmRHEYKEKIMGVQEK(D) | 2132.1355                       | 15.9863                    | -4.0                        | 142737.8/5.46      | HUMAN   | RQ5TCY1     | REVERSE Tau-tubulin kinase 1 OS=Homo sapiens GN=TTBK1 PE=1 SV=2           |
| 3    | 5.53  | 57.6    | 1   | 12/25            | M1072m         | (K)LLmRHEYKEKIMGVQEK(D) | 2132.1355                       | 15.9863                    | -4.0                        | 142737.8/5.46      | HUMAN   | RQ5TCY1     | REVERSE Tau-tubulin kinase 1 OS=Homo sapiens GN=TTBK1 PE=1 SV=2           |
| 4    | 5.18  | 59.0    | 2   | 11/25            | M254m          | (R)VKLVRQmYEHLICVESK(G) | 2132.1355                       | 15.9863                    | -4.0                        | 86045.6/5.68       | HUMAN   | RQ8WYQ5     | REVERSE Protein DGC8 OS=Homo sapiens GN=DGC8 PE=1 SV=1                    |

Detailed Results

| Rank | Score | SPI (%) | BCS | # Unmatched Ions | Variable sites | Sequence                             | MH <sup>+</sup> Calculated (Da) | MH <sup>+</sup> Error (Da) | MH <sup>+</sup> Error (ppm) | Protein MW/pl (Da) | Species | Accession # | MS-Digest Index # | Protein Name                                                      |
|------|-------|---------|-----|------------------|----------------|--------------------------------------|---------------------------------|----------------------------|-----------------------------|--------------------|---------|-------------|-------------------|-------------------------------------------------------------------|
| 1    | 14.95 | 82.1    | 9   | 4/25             | K56k           | (K)E H Y V D L R P F F A G L V K (Y) | 2034.0807                       | 114.0410                   | -0.9                        | 17148.8/5.83       | HUMAN   | P15531      | 438491            | Nucleoside diphosphate kinase A OS=Homo sapiens GN=NME1 PE=1 SV=1 |

  

| Fragment-Ion (m/z)     | 70.064 | 72.079 | 84.080 | 86.095 | 110.068 | 120.078 | 129.100 | 130.084 | 136.073 | 147.111 | 221.099 | 246.177 | 249.096 | 250.095 | 267.105 | 412.157 | 416.288 | 430.170 | 464.284 <sup>+3</sup> | 517.800 <sup>+2</sup> | 575.330 <sup>+2</sup> | 626.252 | 644.262           | 672.697 <sup>+3</sup> | 696.394 <sup>+2</sup> |
|------------------------|--------|--------|--------|--------|---------|---------|---------|---------|---------|---------|---------|---------|---------|---------|---------|---------|---------|---------|-----------------------|-----------------------|-----------------------|---------|-------------------|-----------------------|-----------------------|
| Frac. Inten.(% of TIC) | 0.00   | 0.44   | 0.72   | 0.56   | 0.24    | 0.28    | 0.24    | 10.57   | 0.12    | 7.43    | 6.13    | 3.54    | 12.57   | 3.22    | 8.11    | 6.64    | 2.85    | 7.27    | 5.64                  | 3.54                  | 5.92                  | 5.21    | 2.70              | 2.90                  | 3.14                  |
| Rel. Inten.(% of BP)   | 0.03   | 3.50   | 5.72   | 4.49   | 1.94    | 2.19    | 1.91    | 84.11   | 0.97    | 59.07   | 48.74   | 28.19   | 100.00  | 25.62   | 64.49   | 52.83   | 22.66   | 57.85   | 44.82                 | 28.12                 | 47.09                 | 41.46   | 21.46             | 23.07                 | 24.99                 |
| Score                  | 0.20   | 0.50   | 0.50   | 0.22   | 1.00    | 1.00    | 0.20    | 0.50    | 1.00    | 1.50    | -0.49   | 1.50    | 0.25    | -0.26   | 0.50    | 0.25    | 1.50    | 0.50    | 0.50                  | 1.50                  | 0.25                  | 0.50    | 0.50              | -0.23                 | 1.50                  |
| Ion-type               | PR     | V      | KQ     | LI     | H       | F       | RKQ     | y1-NH3  | Y       | y1      | y2      | b2-H2O  | b2      | b3-H2O  | y4      | b3      | y4      | b3      | y9 <sup>+2</sup>      | y10 <sup>+2</sup>     | b5-H2O                | b5      | y11 <sup>+2</sup> | y11 <sup>+2</sup>     |                       |
| Delta ppm              | -11.8  | -19.1  | -14.0  | -18.9  | -29.7   | -19.8   | -17.3   | -13.5   | -20.5   | -11.6   |         | -15.5   | -14.9   |         | -17.1   | -14.4   | 4.0     | -7.5    |                       | -20.5                 | 9.4                   | -9.6    | -10.5             |                       | 0.5                   |

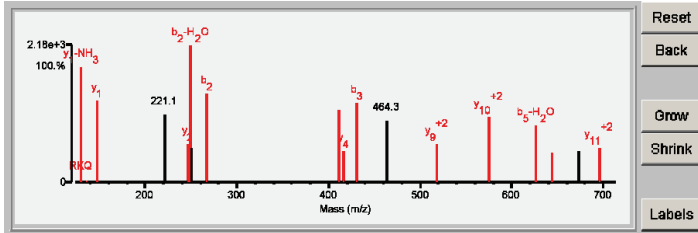

Result Summary

| Rank | Score | SPI (%) | BCS | # Unmatched Ions | # Variable sites | Sequence           | MH <sup>+</sup> Calculated (Da) | MH <sup>+</sup> Error (Da) | MH <sup>+</sup> Error (ppm) | Protein MW/pi (Da) | Species | Accession # | Protein Name                                                             |
|------|-------|---------|-----|------------------|------------------|--------------------|---------------------------------|----------------------------|-----------------------------|--------------------|---------|-------------|--------------------------------------------------------------------------|
| 1    | 15.26 | 85.3    | 7   | 5/25             | K105k            | (R)KYAVLYQPLFDK(R) | 1484.8148                       | 114.0499                   | 4.3                         | 45374.4/4.36       | HUMAN   | P55209      | Nucleosome assembly protein 1-like 1 OS=Homo sapiens GN=NAP1L1 PE=1 SV=1 |

Detailed Results

| Rank | Score | SPI (%) | BCS | # Unmatched Ions | # Variable sites | Sequence                         | MH <sup>+</sup> Calculated (Da) | MH <sup>+</sup> Error (Da) | MH <sup>+</sup> Error (ppm) | Protein MW/pi (Da) | Species | Accession # | MS-Digest Index # | Protein Name                                                             |
|------|-------|---------|-----|------------------|------------------|----------------------------------|---------------------------------|----------------------------|-----------------------------|--------------------|---------|-------------|-------------------|--------------------------------------------------------------------------|
| 1    | 15.26 | 85.3    | 7   | 5/25             | K105k            | (R)K Y A V L I Y Q P L F D K (R) | 1484.8148                       | 114.0499                   | 4.3                         | 45374.4/4.36       | HUMAN   | P55209      | 448905            | Nucleosome assembly protein 1-like 1 OS=Homo sapiens GN=NAP1L1 PE=1 SV=1 |

  

| Fragment-ion (m/z)      | 70.065 | 72.080 | 84.080 | 85.085 | 86.096 | 101.069 | 120.079 | 136.075 | 147.112 | 159.106 | 181.093 | 183.148 | 184.142 | 211.144 | 262.137 | 310.175 <sup>+2</sup> | 391.195 | 409.209 | 410.216 <sup>+2</sup> | 477.237 | 576.308 | 619.343 | 689.394 | 730.389 | 910.466 |
|-------------------------|--------|--------|--------|--------|--------|---------|---------|---------|---------|---------|---------|---------|---------|---------|---------|-----------------------|---------|---------|-----------------------|---------|---------|---------|---------|---------|---------|
| Frac. Inten. (% of TIC) | 0.01   | 0.17   | 0.90   | 2.93   | 0.38   | 0.21    | 0.13    | 0.70    | 5.02    | 2.84    | 2.63    | 5.95    | 3.44    | 4.79    | 5.38    | 4.01                  | 2.95    | 4.19    | 2.88                  | 4.28    | 7.05    | 16.15   | 9.89    | 10.06   | 3.05    |
| Rel. Inten. (% of BP)   | 0.04   | 1.07   | 5.55   | 18.13  | 2.38   | 1.29    | 0.78    | 4.33    | 31.08   | 17.55   | 16.29   | 36.87   | 21.29   | 29.65   | 33.30   | 24.80                 | 18.27   | 25.95   | 17.86                 | 26.52   | 43.64   | 100.00  | 61.25   | 62.31   | 18.89   |
| Score                   | 0.20   | 0.50   | 0.50   | -0.18  | 0.22   | 1.00    | 1.00    | 1.00    | 1.50    | -0.18   | -0.16   | 0.50    | -0.21   | 0.75    | 1.50    | 1.50                  | 0.50    | 1.50    | -0.18                 | 0.50    | 0.50    | 1.50    | 0.50    | 0.50    | 1.50    |
| Ion-type                | PR     | V      | KQ     |        | LI     | KQ      | F       | Y       | y1      |         |         | PL-28   |         | PL      | y2      | y5 <sup>+2</sup>      | y3-H2O  | y3      |                       | b3      | b4      | y5      | b5      | y6-NH3  | y7      |
| Delta ppm               | -3.2   | -5.2   | -12.8  |        | -10.8  |         | -14.0   | -5.8    | -4.8    |         |         | -10.8   |         | -6.2    | -10.1   | -4.0                  | -5.6    | 3.0     |                       | -20.8   | -12.4   | -2.4    | -8.2    | 16.0    | -1.0    |

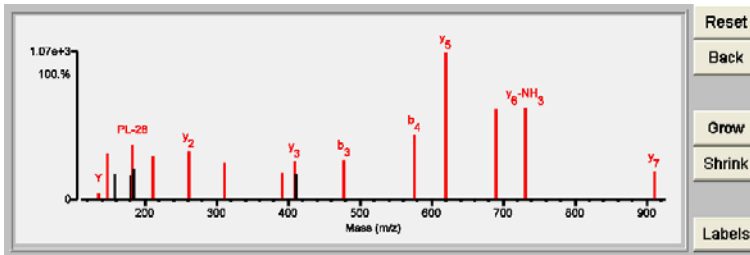

Reset  
Back  
Grow  
Shrink  
Labels

Result Summary

| Rank | Score | SPI (%) | BCS | # Unmatched Ions | Variable sites | Sequence                 | MH <sup>+</sup> Calculated (Da) | MH <sup>+</sup> Error (Da) | MH <sup>+</sup> Error (ppm) | Protein MW/pl (Da) | Species | Accession # | Protein Name                                            |
|------|-------|---------|-----|------------------|----------------|--------------------------|---------------------------------|----------------------------|-----------------------------|--------------------|---------|-------------|---------------------------------------------------------|
| 1    | 9.96  | 62.9    | 10  | 11/25            | K24k           | (R)kVLGSSTSATNSTSVSSR(K) | 1768.9035                       | 114.0509                   | 4.2                         | 11986.6/9.85       | HUMAN   | Q15004      | PCNA-associated factor OS=Homo sapiens GN=PAF PE=1 SV=1 |

Detailed Results

| Rank                       | Score | SPI (%) | BCS    | # Unmatched Ions      | Variable sites | Sequence                                  | MH <sup>+</sup> Calculated (Da) | MH <sup>+</sup> Error (Da) | MH <sup>+</sup> Error (ppm) | Protein MW/pl (Da)    | Species        | Accession # | MS-Digest Index # | Protein Name                                            |                                                 |                       |                |                |                |         |                |         |                |         |                |         |
|----------------------------|-------|---------|--------|-----------------------|----------------|-------------------------------------------|---------------------------------|----------------------------|-----------------------------|-----------------------|----------------|-------------|-------------------|---------------------------------------------------------|-------------------------------------------------|-----------------------|----------------|----------------|----------------|---------|----------------|---------|----------------|---------|----------------|---------|
| 1                          | 9.96  | 62.9    | 10     | 11/25                 | K24k           | (R)kV L G S S T S A T N S T S V S S R (K) | 1768.9035                       | 114.0509                   | 4.2                         | 11986.6/9.85          | HUMAN          | Q15004      | 478119            | PCNA-associated factor OS=Homo sapiens GN=PAF PE=1 SV=1 |                                                 |                       |                |                |                |         |                |         |                |         |                |         |
| Fragment-ion (m/z)         |       | 84.080  | 87.055 | 303.652 <sup>+2</sup> | 314.214        | 326.195                                   | 349.182                         | 362.705                    | 388.697 <sup>+2</sup>       | 426.280 <sup>+2</sup> | 428.732        | 429.243     | 448.252           | 455.302                                                 | 460.710 <sup>+2</sup>                           | 496.239 <sup>+2</sup> | 535.286        | 636.353        | 686.381        | 723.365 | 744.360        | 787.432 | 817.423        | 837.412 | 921.383        | 938.457 |
| Frac. Inten.(% of TIC)     |       | 8.23    | 0.07   | 3.46                  | 3.23           | 2.71                                      | 3.62                            | 3.45                       | 2.94                        | 2.86                  | 2.62           | 2.42        | 3.39              | 2.85                                                    | 4.46                                            | 6.18                  | 9.59           | 3.44           | 3.18           | 7.57    | 2.78           | 2.29    | 3.32           | 9.02    | 2.33           | 4.01    |
| Rel. Inten.(% of BP) Score |       | 85.81   | 0.73   | 36.04                 | 33.65          | 28.22                                     | 37.78                           | 36.02                      | 30.61                       | 29.87                 | 27.34          | 25.27       | 35.33             | 29.76                                                   | 46.49                                           | 64.48                 | 100.00         | 35.88          | 33.15          | 78.97   | 29.02          | 23.84   | 34.58          | 94.08   | 24.30          | 41.77   |
| Ion-type                   |       |         | NR     |                       | a <sub>2</sub> |                                           | y <sub>3</sub>                  |                            |                             |                       | y <sub>4</sub> |             | b <sub>3</sub>    | y <sub>9</sub> -H <sub>2</sub> O <sup>+2</sup>          | y <sub>10</sub> -H <sub>2</sub> O <sup>+2</sup> | y <sub>5</sub>        | y <sub>6</sub> | b <sub>6</sub> | y <sub>7</sub> |         | b <sub>7</sub> |         | y <sub>8</sub> |         | y <sub>9</sub> |         |
| Delta ppm                  |       |         | 0.1    |                       | -16.8          |                                           | -2.6                            |                            |                             |                       | 0.4            |             | 0.4               | 6.5                                                     | -32.9                                           | -9.5                  | 4.2            | 34.2           | -5.3           | 3.0     |                | -0.6    |                | 6.9     |                | 3.3     |

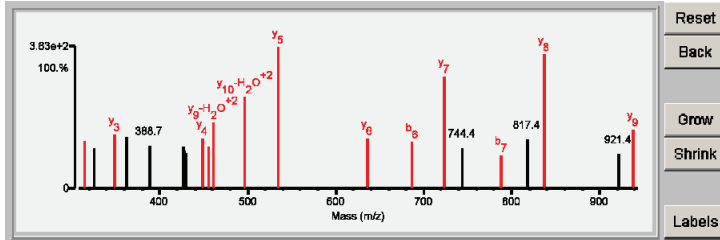

Result Summary

| Rank | Score | SPI (%) | BCS | # Unmatched ions | Variable sites | Sequence            | MH <sup>+</sup> Calculated (Da) | MH <sup>+</sup> Error (Da) | MH <sup>+</sup> Error (ppm) | Protein MW/pi (Da) | Species | Accession # | Protein Name                                                                          |
|------|-------|---------|-----|------------------|----------------|---------------------|---------------------------------|----------------------------|-----------------------------|--------------------|---------|-------------|---------------------------------------------------------------------------------------|
| 1    | 13.33 | 76.6    | 7   | 9/25             | K48k           | (K)LLNLISKLFCSGT(-) | 1465.8083                       | 114.0442                   | 0.8                         | 6030.1/10.30       | HUMAN   | Q13794      | Phorbol-12-myristate-13-acetate-induced protein 1 OS=Homo sapiens GN=PMAIP1 PE=1 SV=1 |

Detailed Results

| Rank | Score | SPI (%)                 | BCS    | # Unmatched ions | Variable sites | Sequence            | MH <sup>+</sup> Calculated (Da) | MH <sup>+</sup> Error (Da) | MH <sup>+</sup> Error (ppm) | Protein MW/pi (Da) | Species | Accession # | MS-Digest Index # | Protein Name                                                                          |         |                       |         |         |         |         |         |         |         |          |          |          |          |
|------|-------|-------------------------|--------|------------------|----------------|---------------------|---------------------------------|----------------------------|-----------------------------|--------------------|---------|-------------|-------------------|---------------------------------------------------------------------------------------|---------|-----------------------|---------|---------|---------|---------|---------|---------|---------|----------|----------|----------|----------|
| 1    | 13.33 | 76.6                    | 7      | 9/25             | K48k           | (K)LLNLISKLFCSGT(-) | 1465.8083                       | 114.0442                   | 0.8                         | 6030.1/10.30       | HUMAN   | Q13794      | 27551             | Phorbol-12-myristate-13-acetate-induced protein 1 OS=Homo sapiens GN=PMAIP1 PE=1 SV=1 |         |                       |         |         |         |         |         |         |         |          |          |          |          |
|      |       | Fragment-ion (m/z)      | 70.064 | 72.082           | 84.079         | 86.095              | 87.055                          | 120.080                    | 199.187                     | 200.150            | 227.177 | 228.134     | 246.111           | 341.214                                                                               | 424.146 | 443.270 <sup>+2</sup> | 454.304 | 567.372 | 571.213 | 636.366 | 750.361 | 807.392 | 926.434 | 1007.448 | 1013.467 | 1126.562 | 1353.668 |
|      |       | Frac. Inten. (% of TIC) | 0.07   | 3.61             | 3.64           | 10.60               | 0.07                            | 0.11                       | 2.74                        | 2.19               | 4.96    | 4.43        | 4.33              | 11.48                                                                                 | 3.07    | 2.97                  | 11.68   | 3.18    | 4.39    | 2.18    | 2.02    | 3.65    | 2.15    | 3.02     | 7.82     | 3.28     | 2.34     |
|      |       | Rel. Inten. (% of BP)   | 0.57   | 30.86            | 31.19          | 90.75               | 0.64                            | 0.94                       | 23.47                       | 18.77              | 42.47   | 37.88       | 37.10             | 98.28                                                                                 | 26.28   | 25.41                 | 100.00  | 27.22   | 37.53   | 18.69   | 17.31   | 31.25   | 18.40   | 25.82    | 66.92    | 28.05    | 20.03    |
|      |       | Score                   | -0.01  | -0.31            | -0.31          | 0.50                | 0.33                            | 1.00                       | 0.50                        | -0.19              | 0.75    | 0.75        | 0.50              | 0.75                                                                                  | 1.50    | -0.25                 | 0.75    | 0.50    | 1.50    | -0.19   | -0.17   | -0.31   | 1.50    | -0.26    | 1.50     | 1.50     | 1.50     |
|      |       | Ion-type                |        |                  |                | a1                  | NR                              | F                          | a2                          | b2                 | NL      | y3-H2O      | b3                | y4                                                                                    |         | b4                    | b5      | y5      |         |         |         | y7      |         |          | y8       | y9       | y11      |
|      |       | Delta ppm               |        |                  |                | -25.8               | -5.6                            | -9.8                       | 26.2                        |                    | 0.4     | -4.2        | 9.6               | -15.3                                                                                 | -7.7    |                       | 0.2     | -27.9   | -9.1    |         |         |         | -6.9    |          | -4.6     | 5.3      | -11.4    |

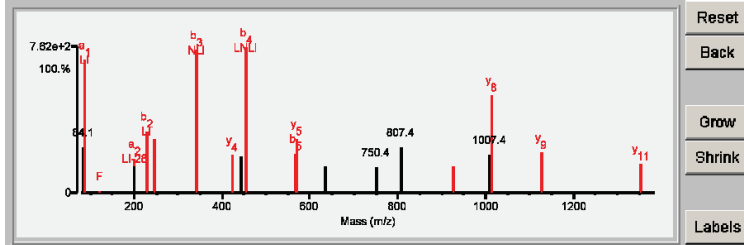

Reset

Back

Grow

Shrink

Labels

Result Summary

| Rank | Score | SPI (%) | BCS | # Unmatched Ions | Variable sites | Sequence                      | MH <sup>+</sup> Calculated (Da) | MH <sup>+</sup> Error (Da) | MH <sup>+</sup> Error (ppm) | Protein MW/pI (Da) | Species | Accession # | Protein Name                                                                                                        |
|------|-------|---------|-----|------------------|----------------|-------------------------------|---------------------------------|----------------------------|-----------------------------|--------------------|---------|-------------|---------------------------------------------------------------------------------------------------------------------|
| 1    | 21.02 | 87.5    | 9   | 5/25             | K86k           | (R)MIAPEGLVFEKAWNAYPCR(T)     | 2639.2534                       | 114.0576                   | 5.3                         | 31540.2/6.41       | HUMAN   | P48739      | Phosphatidylinositol transfer protein beta isoform OS=Homo sapiens GN=PITPNB PE=1 SV=2                              |
| 2    | 4.54  | 50.9    | 2   | 15/25            | M204m M209m    | (K)TFHEVSQKNAPFLEmLRNDmSVK(R) | 2721.3487                       | 31.9623                    | -10.0                       | 48043.5/5.75       | HUMAN   | RP0C779     | REVERSE Putative basic leucine zipper and W2 domain-containing protein 1-like 1 OS=Homo sapiens GN=BZW1L1 PE=2 SV=1 |
| 2    | 4.54  | 50.9    | 2   | 15/25            | M204m M209m    | (K)TFHEVSQKNAPFLEmLRNDmSVK(R) | 2721.3487                       | 31.9623                    | -10.0                       | 48043.5/5.75       | HUMAN   | RQ7L1Q6     | REVERSE Basic leucine zipper and W2 domain-containing protein 1 OS=Homo sapiens GN=BZW1 PE=1 SV=1                   |
| 3    | 3.30  | 55.7    | 1   | 15/25            | M429m          | (K)MLDFFGHIDGCVIPADVEImK(E)   | 2737.3034                       | 16.0076                    | 4.6                         | 57073.6/6.78       | HUMAN   | RP48454     | REVERSE Serine/threonine-protein phosphatase 2B catalytic subunit gamma isoform OS=Homo sapiens GN=PPP3CC PE=2 SV=2 |

Detailed Results

| Rank                                                                                                                                                                                                                                                                                                                                                                                                                                                                                                                                                                                                                                                                                                                                                                                                                                                                                                                                                                                                                                                                                                                                                                                                                                                                                                                                                                                                                                                                                                                                                                                                                                                                                                                                                                                                                                                                                                                                                                                                                                                                                                                                                                                                                                                                                                                                                                                                                                                                                                                                                                                                                                                                                                                                                                     | Score  | SPI (%) | BCS    | # Unmatched Ions | Variable sites | Sequence                  | MH <sup>+</sup> Calculated (Da) | MH <sup>+</sup> Error (Da) | MH <sup>+</sup> Error (ppm) | Protein MW/pI (Da) | Species        | Accession #      | MS-Digest Index # | Protein Name                                                                           |                       |                |                                                 |                               |                |                               |                       |                |                   |                |                        |         |         |         |         |                       |         |                       |                       |         |                       |                       |         |          |          |                        |                         |      |      |      |      |      |      |      |      |       |      |      |      |      |       |      |      |      |       |      |      |      |      |      |      |      |                       |      |      |      |       |      |      |      |       |        |      |       |       |       |       |       |       |      |       |       |       |       |       |       |      |       |       |      |       |      |      |      |      |      |       |      |       |      |      |      |      |       |      |      |      |      |      |       |      |      |      |      |          |    |  |    |                |   |   |    |  |                |  |                |                  |                |                |  |                |                                                 |                               |                |                               |  |                |                   |                |           |       |  |      |       |       |     |       |  |      |  |     |      |      |     |  |  |     |     |      |      |  |      |     |      |     |
|--------------------------------------------------------------------------------------------------------------------------------------------------------------------------------------------------------------------------------------------------------------------------------------------------------------------------------------------------------------------------------------------------------------------------------------------------------------------------------------------------------------------------------------------------------------------------------------------------------------------------------------------------------------------------------------------------------------------------------------------------------------------------------------------------------------------------------------------------------------------------------------------------------------------------------------------------------------------------------------------------------------------------------------------------------------------------------------------------------------------------------------------------------------------------------------------------------------------------------------------------------------------------------------------------------------------------------------------------------------------------------------------------------------------------------------------------------------------------------------------------------------------------------------------------------------------------------------------------------------------------------------------------------------------------------------------------------------------------------------------------------------------------------------------------------------------------------------------------------------------------------------------------------------------------------------------------------------------------------------------------------------------------------------------------------------------------------------------------------------------------------------------------------------------------------------------------------------------------------------------------------------------------------------------------------------------------------------------------------------------------------------------------------------------------------------------------------------------------------------------------------------------------------------------------------------------------------------------------------------------------------------------------------------------------------------------------------------------------------------------------------------------------|--------|---------|--------|------------------|----------------|---------------------------|---------------------------------|----------------------------|-----------------------------|--------------------|----------------|------------------|-------------------|----------------------------------------------------------------------------------------|-----------------------|----------------|-------------------------------------------------|-------------------------------|----------------|-------------------------------|-----------------------|----------------|-------------------|----------------|------------------------|---------|---------|---------|---------|-----------------------|---------|-----------------------|-----------------------|---------|-----------------------|-----------------------|---------|----------|----------|------------------------|-------------------------|------|------|------|------|------|------|------|------|-------|------|------|------|------|-------|------|------|------|-------|------|------|------|------|------|------|------|-----------------------|------|------|------|-------|------|------|------|-------|--------|------|-------|-------|-------|-------|-------|-------|------|-------|-------|-------|-------|-------|-------|------|-------|-------|------|-------|------|------|------|------|------|-------|------|-------|------|------|------|------|-------|------|------|------|------|------|-------|------|------|------|------|----------|----|--|----|----------------|---|---|----|--|----------------|--|----------------|------------------|----------------|----------------|--|----------------|-------------------------------------------------|-------------------------------|----------------|-------------------------------|--|----------------|-------------------|----------------|-----------|-------|--|------|-------|-------|-----|-------|--|------|--|-----|------|------|-----|--|--|-----|-----|------|------|--|------|-----|------|-----|
| 1                                                                                                                                                                                                                                                                                                                                                                                                                                                                                                                                                                                                                                                                                                                                                                                                                                                                                                                                                                                                                                                                                                                                                                                                                                                                                                                                                                                                                                                                                                                                                                                                                                                                                                                                                                                                                                                                                                                                                                                                                                                                                                                                                                                                                                                                                                                                                                                                                                                                                                                                                                                                                                                                                                                                                                        | 21.02  | 87.5    | 9      | 5/25             | K86k           | (R)MIAPEGLVFEKAWNAYPCR(T) | 2639.2534                       | 114.0576                   | 5.3                         | 31540.2/6.41       | HUMAN          | P48739           | 501601            | Phosphatidylinositol transfer protein beta isoform OS=Homo sapiens GN=PITPNB PE=1 SV=2 |                       |                |                                                 |                               |                |                               |                       |                |                   |                |                        |         |         |         |         |                       |         |                       |                       |         |                       |                       |         |          |          |                        |                         |      |      |      |      |      |      |      |      |       |      |      |      |      |       |      |      |      |       |      |      |      |      |      |      |      |                       |      |      |      |       |      |      |      |       |        |      |       |       |       |       |       |       |      |       |       |       |       |       |       |      |       |       |      |       |      |      |      |      |      |       |      |       |      |      |      |      |       |      |      |      |      |      |       |      |      |      |      |          |    |  |    |                |   |   |    |  |                |  |                |                  |                |                |  |                |                                                 |                               |                |                               |  |                |                   |                |           |       |  |      |       |       |     |       |  |      |  |     |      |      |     |  |  |     |     |      |      |  |      |     |      |     |
| <table border="1"> <thead> <tr> <th>Fragment-ion (m/z)</th> <th>70.064</th> <th>84.081</th> <th>86.096</th> <th>104.052</th> <th>136.073</th> <th>159.092</th> <th>169.095</th> <th>172.115</th> <th>217.136</th> <th>218.140</th> <th>245.132</th> <th>288.142</th> <th>316.168</th> <th>395.268</th> <th>655.341<sup>+2</sup></th> <th>758.335</th> <th>807.385<sup>+3</sup></th> <th>813.390<sup>+3</sup></th> <th>829.365</th> <th>837.085<sup>+3</sup></th> <th>922.440<sup>+2</sup></th> <th>943.405</th> <th>1106.530</th> <th>1129.484</th> <th>1171.053<sup>+2</sup></th> </tr> </thead> <tbody> <tr> <td>Frac. Inten. (% of TIC)</td> <td>0.01</td> <td>1.68</td> <td>0.09</td> <td>4.71</td> <td>0.10</td> <td>0.05</td> <td>1.86</td> <td>4.39</td> <td>19.23</td> <td>1.88</td> <td>6.89</td> <td>2.60</td> <td>3.52</td> <td>15.85</td> <td>2.14</td> <td>3.59</td> <td>1.78</td> <td>10.57</td> <td>2.36</td> <td>6.39</td> <td>2.46</td> <td>2.02</td> <td>1.99</td> <td>1.55</td> <td>2.31</td> </tr> <tr> <td>Rel. Inten. (% of BP)</td> <td>0.03</td> <td>8.75</td> <td>0.46</td> <td>24.52</td> <td>0.51</td> <td>0.24</td> <td>9.07</td> <td>22.84</td> <td>100.00</td> <td>9.70</td> <td>35.93</td> <td>13.53</td> <td>18.30</td> <td>82.43</td> <td>11.11</td> <td>18.65</td> <td>9.27</td> <td>54.97</td> <td>12.28</td> <td>33.22</td> <td>12.77</td> <td>10.50</td> <td>10.36</td> <td>8.05</td> <td>12.02</td> </tr> <tr> <td>Score</td> <td>0.20</td> <td>-0.09</td> <td>0.22</td> <td>0.50</td> <td>1.00</td> <td>2.00</td> <td>0.75</td> <td>-0.23</td> <td>0.50</td> <td>-0.10</td> <td>0.50</td> <td>1.50</td> <td>0.50</td> <td>1.50</td> <td>-0.11</td> <td>1.50</td> <td>1.50</td> <td>1.50</td> <td>1.50</td> <td>1.50</td> <td>-0.13</td> <td>1.50</td> <td>1.50</td> <td>1.50</td> <td>1.50</td> </tr> <tr> <td>Ion-type</td> <td>PR</td> <td></td> <td>LI</td> <td>a<sub>1</sub></td> <td>Y</td> <td>W</td> <td>AP</td> <td></td> <td>a<sub>2</sub></td> <td></td> <td>b<sub>2</sub></td> <td>y<sup>++4</sup></td> <td>b<sub>3</sub></td> <td>y<sub>4</sub></td> <td></td> <td>y<sub>5</sub></td> <td>y<sub>19</sub>+H<sub>2</sub>O<sup>+3</sup></td> <td>y<sub>19</sub><sup>+3</sup></td> <td>y<sub>6</sub></td> <td>y<sub>20</sub><sup>+3</sup></td> <td></td> <td>y<sub>7</sub></td> <td>y<sup>++17</sup></td> <td>y<sub>8</sub></td> </tr> <tr> <td>Delta ppm</td> <td>-18.9</td> <td></td> <td>-9.6</td> <td>-12.9</td> <td>-19.0</td> <td>3.3</td> <td>-13.3</td> <td></td> <td>-6.5</td> <td></td> <td>0.3</td> <td>19.5</td> <td>-1.7</td> <td>3.2</td> <td></td> <td></td> <td>6.5</td> <td>9.0</td> <td>-1.4</td> <td>26.9</td> <td></td> <td>-4.4</td> <td>5.6</td> <td>-4.2</td> <td>6.9</td> </tr> </tbody> </table> |        |         |        |                  |                |                           |                                 |                            |                             |                    |                |                  |                   |                                                                                        | Fragment-ion (m/z)    | 70.064         | 84.081                                          | 86.096                        | 104.052        | 136.073                       | 159.092               | 169.095        | 172.115           | 217.136        | 218.140                | 245.132 | 288.142 | 316.168 | 395.268 | 655.341 <sup>+2</sup> | 758.335 | 807.385 <sup>+3</sup> | 813.390 <sup>+3</sup> | 829.365 | 837.085 <sup>+3</sup> | 922.440 <sup>+2</sup> | 943.405 | 1106.530 | 1129.484 | 1171.053 <sup>+2</sup> | Frac. Inten. (% of TIC) | 0.01 | 1.68 | 0.09 | 4.71 | 0.10 | 0.05 | 1.86 | 4.39 | 19.23 | 1.88 | 6.89 | 2.60 | 3.52 | 15.85 | 2.14 | 3.59 | 1.78 | 10.57 | 2.36 | 6.39 | 2.46 | 2.02 | 1.99 | 1.55 | 2.31 | Rel. Inten. (% of BP) | 0.03 | 8.75 | 0.46 | 24.52 | 0.51 | 0.24 | 9.07 | 22.84 | 100.00 | 9.70 | 35.93 | 13.53 | 18.30 | 82.43 | 11.11 | 18.65 | 9.27 | 54.97 | 12.28 | 33.22 | 12.77 | 10.50 | 10.36 | 8.05 | 12.02 | Score | 0.20 | -0.09 | 0.22 | 0.50 | 1.00 | 2.00 | 0.75 | -0.23 | 0.50 | -0.10 | 0.50 | 1.50 | 0.50 | 1.50 | -0.11 | 1.50 | 1.50 | 1.50 | 1.50 | 1.50 | -0.13 | 1.50 | 1.50 | 1.50 | 1.50 | Ion-type | PR |  | LI | a <sub>1</sub> | Y | W | AP |  | a <sub>2</sub> |  | b <sub>2</sub> | y <sup>++4</sup> | b <sub>3</sub> | y <sub>4</sub> |  | y <sub>5</sub> | y <sub>19</sub> +H <sub>2</sub> O <sup>+3</sup> | y <sub>19</sub> <sup>+3</sup> | y <sub>6</sub> | y <sub>20</sub> <sup>+3</sup> |  | y <sub>7</sub> | y <sup>++17</sup> | y <sub>8</sub> | Delta ppm | -18.9 |  | -9.6 | -12.9 | -19.0 | 3.3 | -13.3 |  | -6.5 |  | 0.3 | 19.5 | -1.7 | 3.2 |  |  | 6.5 | 9.0 | -1.4 | 26.9 |  | -4.4 | 5.6 | -4.2 | 6.9 |
| Fragment-ion (m/z)                                                                                                                                                                                                                                                                                                                                                                                                                                                                                                                                                                                                                                                                                                                                                                                                                                                                                                                                                                                                                                                                                                                                                                                                                                                                                                                                                                                                                                                                                                                                                                                                                                                                                                                                                                                                                                                                                                                                                                                                                                                                                                                                                                                                                                                                                                                                                                                                                                                                                                                                                                                                                                                                                                                                                       | 70.064 | 84.081  | 86.096 | 104.052          | 136.073        | 159.092                   | 169.095                         | 172.115                    | 217.136                     | 218.140            | 245.132        | 288.142          | 316.168           | 395.268                                                                                | 655.341 <sup>+2</sup> | 758.335        | 807.385 <sup>+3</sup>                           | 813.390 <sup>+3</sup>         | 829.365        | 837.085 <sup>+3</sup>         | 922.440 <sup>+2</sup> | 943.405        | 1106.530          | 1129.484       | 1171.053 <sup>+2</sup> |         |         |         |         |                       |         |                       |                       |         |                       |                       |         |          |          |                        |                         |      |      |      |      |      |      |      |      |       |      |      |      |      |       |      |      |      |       |      |      |      |      |      |      |      |                       |      |      |      |       |      |      |      |       |        |      |       |       |       |       |       |       |      |       |       |       |       |       |       |      |       |       |      |       |      |      |      |      |      |       |      |       |      |      |      |      |       |      |      |      |      |      |       |      |      |      |      |          |    |  |    |                |   |   |    |  |                |  |                |                  |                |                |  |                |                                                 |                               |                |                               |  |                |                   |                |           |       |  |      |       |       |     |       |  |      |  |     |      |      |     |  |  |     |     |      |      |  |      |     |      |     |
| Frac. Inten. (% of TIC)                                                                                                                                                                                                                                                                                                                                                                                                                                                                                                                                                                                                                                                                                                                                                                                                                                                                                                                                                                                                                                                                                                                                                                                                                                                                                                                                                                                                                                                                                                                                                                                                                                                                                                                                                                                                                                                                                                                                                                                                                                                                                                                                                                                                                                                                                                                                                                                                                                                                                                                                                                                                                                                                                                                                                  | 0.01   | 1.68    | 0.09   | 4.71             | 0.10           | 0.05                      | 1.86                            | 4.39                       | 19.23                       | 1.88               | 6.89           | 2.60             | 3.52              | 15.85                                                                                  | 2.14                  | 3.59           | 1.78                                            | 10.57                         | 2.36           | 6.39                          | 2.46                  | 2.02           | 1.99              | 1.55           | 2.31                   |         |         |         |         |                       |         |                       |                       |         |                       |                       |         |          |          |                        |                         |      |      |      |      |      |      |      |      |       |      |      |      |      |       |      |      |      |       |      |      |      |      |      |      |      |                       |      |      |      |       |      |      |      |       |        |      |       |       |       |       |       |       |      |       |       |       |       |       |       |      |       |       |      |       |      |      |      |      |      |       |      |       |      |      |      |      |       |      |      |      |      |      |       |      |      |      |      |          |    |  |    |                |   |   |    |  |                |  |                |                  |                |                |  |                |                                                 |                               |                |                               |  |                |                   |                |           |       |  |      |       |       |     |       |  |      |  |     |      |      |     |  |  |     |     |      |      |  |      |     |      |     |
| Rel. Inten. (% of BP)                                                                                                                                                                                                                                                                                                                                                                                                                                                                                                                                                                                                                                                                                                                                                                                                                                                                                                                                                                                                                                                                                                                                                                                                                                                                                                                                                                                                                                                                                                                                                                                                                                                                                                                                                                                                                                                                                                                                                                                                                                                                                                                                                                                                                                                                                                                                                                                                                                                                                                                                                                                                                                                                                                                                                    | 0.03   | 8.75    | 0.46   | 24.52            | 0.51           | 0.24                      | 9.07                            | 22.84                      | 100.00                      | 9.70               | 35.93          | 13.53            | 18.30             | 82.43                                                                                  | 11.11                 | 18.65          | 9.27                                            | 54.97                         | 12.28          | 33.22                         | 12.77                 | 10.50          | 10.36             | 8.05           | 12.02                  |         |         |         |         |                       |         |                       |                       |         |                       |                       |         |          |          |                        |                         |      |      |      |      |      |      |      |      |       |      |      |      |      |       |      |      |      |       |      |      |      |      |      |      |      |                       |      |      |      |       |      |      |      |       |        |      |       |       |       |       |       |       |      |       |       |       |       |       |       |      |       |       |      |       |      |      |      |      |      |       |      |       |      |      |      |      |       |      |      |      |      |      |       |      |      |      |      |          |    |  |    |                |   |   |    |  |                |  |                |                  |                |                |  |                |                                                 |                               |                |                               |  |                |                   |                |           |       |  |      |       |       |     |       |  |      |  |     |      |      |     |  |  |     |     |      |      |  |      |     |      |     |
| Score                                                                                                                                                                                                                                                                                                                                                                                                                                                                                                                                                                                                                                                                                                                                                                                                                                                                                                                                                                                                                                                                                                                                                                                                                                                                                                                                                                                                                                                                                                                                                                                                                                                                                                                                                                                                                                                                                                                                                                                                                                                                                                                                                                                                                                                                                                                                                                                                                                                                                                                                                                                                                                                                                                                                                                    | 0.20   | -0.09   | 0.22   | 0.50             | 1.00           | 2.00                      | 0.75                            | -0.23                      | 0.50                        | -0.10              | 0.50           | 1.50             | 0.50              | 1.50                                                                                   | -0.11                 | 1.50           | 1.50                                            | 1.50                          | 1.50           | 1.50                          | -0.13                 | 1.50           | 1.50              | 1.50           | 1.50                   |         |         |         |         |                       |         |                       |                       |         |                       |                       |         |          |          |                        |                         |      |      |      |      |      |      |      |      |       |      |      |      |      |       |      |      |      |       |      |      |      |      |      |      |      |                       |      |      |      |       |      |      |      |       |        |      |       |       |       |       |       |       |      |       |       |       |       |       |       |      |       |       |      |       |      |      |      |      |      |       |      |       |      |      |      |      |       |      |      |      |      |      |       |      |      |      |      |          |    |  |    |                |   |   |    |  |                |  |                |                  |                |                |  |                |                                                 |                               |                |                               |  |                |                   |                |           |       |  |      |       |       |     |       |  |      |  |     |      |      |     |  |  |     |     |      |      |  |      |     |      |     |
| Ion-type                                                                                                                                                                                                                                                                                                                                                                                                                                                                                                                                                                                                                                                                                                                                                                                                                                                                                                                                                                                                                                                                                                                                                                                                                                                                                                                                                                                                                                                                                                                                                                                                                                                                                                                                                                                                                                                                                                                                                                                                                                                                                                                                                                                                                                                                                                                                                                                                                                                                                                                                                                                                                                                                                                                                                                 | PR     |         | LI     | a <sub>1</sub>   | Y              | W                         | AP                              |                            | a <sub>2</sub>              |                    | b <sub>2</sub> | y <sup>++4</sup> | b <sub>3</sub>    | y <sub>4</sub>                                                                         |                       | y <sub>5</sub> | y <sub>19</sub> +H <sub>2</sub> O <sup>+3</sup> | y <sub>19</sub> <sup>+3</sup> | y <sub>6</sub> | y <sub>20</sub> <sup>+3</sup> |                       | y <sub>7</sub> | y <sup>++17</sup> | y <sub>8</sub> |                        |         |         |         |         |                       |         |                       |                       |         |                       |                       |         |          |          |                        |                         |      |      |      |      |      |      |      |      |       |      |      |      |      |       |      |      |      |       |      |      |      |      |      |      |      |                       |      |      |      |       |      |      |      |       |        |      |       |       |       |       |       |       |      |       |       |       |       |       |       |      |       |       |      |       |      |      |      |      |      |       |      |       |      |      |      |      |       |      |      |      |      |      |       |      |      |      |      |          |    |  |    |                |   |   |    |  |                |  |                |                  |                |                |  |                |                                                 |                               |                |                               |  |                |                   |                |           |       |  |      |       |       |     |       |  |      |  |     |      |      |     |  |  |     |     |      |      |  |      |     |      |     |
| Delta ppm                                                                                                                                                                                                                                                                                                                                                                                                                                                                                                                                                                                                                                                                                                                                                                                                                                                                                                                                                                                                                                                                                                                                                                                                                                                                                                                                                                                                                                                                                                                                                                                                                                                                                                                                                                                                                                                                                                                                                                                                                                                                                                                                                                                                                                                                                                                                                                                                                                                                                                                                                                                                                                                                                                                                                                | -18.9  |         | -9.6   | -12.9            | -19.0          | 3.3                       | -13.3                           |                            | -6.5                        |                    | 0.3            | 19.5             | -1.7              | 3.2                                                                                    |                       |                | 6.5                                             | 9.0                           | -1.4           | 26.9                          |                       | -4.4           | 5.6               | -4.2           | 6.9                    |         |         |         |         |                       |         |                       |                       |         |                       |                       |         |          |          |                        |                         |      |      |      |      |      |      |      |      |       |      |      |      |      |       |      |      |      |       |      |      |      |      |      |      |      |                       |      |      |      |       |      |      |      |       |        |      |       |       |       |       |       |       |      |       |       |       |       |       |       |      |       |       |      |       |      |      |      |      |      |       |      |       |      |      |      |      |       |      |      |      |      |      |       |      |      |      |      |          |    |  |    |                |   |   |    |  |                |  |                |                  |                |                |  |                |                                                 |                               |                |                               |  |                |                   |                |           |       |  |      |       |       |     |       |  |      |  |     |      |      |     |  |  |     |     |      |      |  |      |     |      |     |

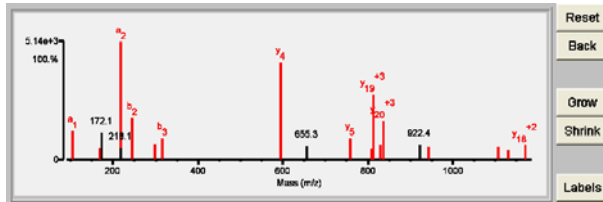



Result Summary

| Rank | Score | SPI (%) | BCS | # Unmatched Ions | Variable sites | Sequence                      | MH <sup>+</sup> Calculated (Da) | MH <sup>+</sup> Error (Da) | MH <sup>+</sup> Error (ppm) | Protein MW/pI (Da) | Species | Accession # | Protein Name                                                                                |
|------|-------|---------|-----|------------------|----------------|-------------------------------|---------------------------------|----------------------------|-----------------------------|--------------------|---------|-------------|---------------------------------------------------------------------------------------------|
| 1    | 13.89 | 72.4    | 6   | 7/25             | K103k          | (K)GAIQLVGIHTHTVGSLSLTKPER(D) | 2065.1400                       | 114.0689                   | 11.9                        | 62633.7/8.41       | HUMAN   | Q99755      | Phosphatidylinositol-4-phosphate 5-kinase type-1 alpha OS=Homo sapiens GN=PIPSK1A PE=1 SV=1 |
| 2    | 5.91  | 68.3    | 1   | 11/25            | K935k K937k    | (K)IDKRNYYQIGTKVFLK(E)        | 1951.1487                       | 228.0602                   | -11.8                       | 243559.3/8.88      | HUMAN   | Q13489      | Myosin-Ib OS=Homo sapiens GN=MYO9B PE=1 SV=2                                                |
| 3    | 5.24  | 50.3    | 2   | 10/25            | None           | (K)NVQALFQRNPQLFESIFK(D)      | 2179.1658                       | 0.0431                     | 19.8                        | 121165.8/8.74      | HUMAN   | RQ9YEK6     | REVERSE Z-5'-oligoadenylate synthetase 3 OS=Homo sapiens GN=OAS3 PE=1 SV=2                  |

Detailed Results

| Rank                                                                                                                                                                                                                                                                                                                                                                                                                                                                                                                                                                                                                                                                                                                                                                                                                                                                                                                                                                                                                                                                                                                                                                                                                                                                                                                                                                                                                                                                                                                                                                                                                                                                                                                                                                                                                                                                                                                                                                                                                                                                                                                                                                                                                                                                                                                                                                                                                                                                                                                                                                                                                                                                                                                                                                                                                                     | Score  | SPI (%) | BCS    | # Unmatched Ions | Variable sites | Sequence                      | MH <sup>+</sup> Calculated (Da) | MH <sup>+</sup> Error (Da) | MH <sup>+</sup> Error (ppm) | Protein MW/pI (Da) | Species | Accession # | MS-Digest Index # | Protein Name                                                                                |                    |         |         |         |         |         |                                    |                       |         |         |         |         |         |         |         |         |         |         |         |         |         |                       |                       |         |         |         |                         |      |      |      |      |      |      |      |      |      |      |      |      |      |      |      |      |      |       |      |      |      |      |      |      |      |                       |      |      |      |      |       |       |      |      |       |      |       |       |       |       |       |       |       |        |       |       |       |       |       |       |       |       |      |      |      |      |      |       |      |      |       |      |       |       |      |       |      |      |      |      |       |      |       |      |      |      |      |          |    |   |   |    |    |  |    |   |     |  |  |    |    |    |      |    |  |        |  |  |                                    |    |    |    |  |           |     |       |       |      |      |  |       |       |  |      |  |  |      |  |       |      |       |     |  |      |  |      |      |     |     |  |  |  |  |  |  |  |    |  |  |  |  |  |  |  |       |      |  |  |  |  |  |  |  |  |  |  |
|------------------------------------------------------------------------------------------------------------------------------------------------------------------------------------------------------------------------------------------------------------------------------------------------------------------------------------------------------------------------------------------------------------------------------------------------------------------------------------------------------------------------------------------------------------------------------------------------------------------------------------------------------------------------------------------------------------------------------------------------------------------------------------------------------------------------------------------------------------------------------------------------------------------------------------------------------------------------------------------------------------------------------------------------------------------------------------------------------------------------------------------------------------------------------------------------------------------------------------------------------------------------------------------------------------------------------------------------------------------------------------------------------------------------------------------------------------------------------------------------------------------------------------------------------------------------------------------------------------------------------------------------------------------------------------------------------------------------------------------------------------------------------------------------------------------------------------------------------------------------------------------------------------------------------------------------------------------------------------------------------------------------------------------------------------------------------------------------------------------------------------------------------------------------------------------------------------------------------------------------------------------------------------------------------------------------------------------------------------------------------------------------------------------------------------------------------------------------------------------------------------------------------------------------------------------------------------------------------------------------------------------------------------------------------------------------------------------------------------------------------------------------------------------------------------------------------------------|--------|---------|--------|------------------|----------------|-------------------------------|---------------------------------|----------------------------|-----------------------------|--------------------|---------|-------------|-------------------|---------------------------------------------------------------------------------------------|--------------------|---------|---------|---------|---------|---------|------------------------------------|-----------------------|---------|---------|---------|---------|---------|---------|---------|---------|---------|---------|---------|---------|---------|-----------------------|-----------------------|---------|---------|---------|-------------------------|------|------|------|------|------|------|------|------|------|------|------|------|------|------|------|------|------|-------|------|------|------|------|------|------|------|-----------------------|------|------|------|------|-------|-------|------|------|-------|------|-------|-------|-------|-------|-------|-------|-------|--------|-------|-------|-------|-------|-------|-------|-------|-------|------|------|------|------|------|-------|------|------|-------|------|-------|-------|------|-------|------|------|------|------|-------|------|-------|------|------|------|------|----------|----|---|---|----|----|--|----|---|-----|--|--|----|----|----|------|----|--|--------|--|--|------------------------------------|----|----|----|--|-----------|-----|-------|-------|------|------|--|-------|-------|--|------|--|--|------|--|-------|------|-------|-----|--|------|--|------|------|-----|-----|--|--|--|--|--|--|--|----|--|--|--|--|--|--|--|-------|------|--|--|--|--|--|--|--|--|--|--|
| 1                                                                                                                                                                                                                                                                                                                                                                                                                                                                                                                                                                                                                                                                                                                                                                                                                                                                                                                                                                                                                                                                                                                                                                                                                                                                                                                                                                                                                                                                                                                                                                                                                                                                                                                                                                                                                                                                                                                                                                                                                                                                                                                                                                                                                                                                                                                                                                                                                                                                                                                                                                                                                                                                                                                                                                                                                                        | 13.89  | 72.4    | 6      | 7/25             | K103k          | (K)GAIQLVGIHTHTVGSLSLTKPER(D) | 2065.1400                       | 114.0689                   | 11.9                        | 62633.7/8.41       | HUMAN   | Q99755      | 500231            | Phosphatidylinositol-4-phosphate 5-kinase type-1 alpha OS=Homo sapiens GN=PIPSK1A PE=1 SV=1 |                    |         |         |         |         |         |                                    |                       |         |         |         |         |         |         |         |         |         |         |         |         |         |                       |                       |         |         |         |                         |      |      |      |      |      |      |      |      |      |      |      |      |      |      |      |      |      |       |      |      |      |      |      |      |      |                       |      |      |      |      |       |       |      |      |       |      |       |       |       |       |       |       |       |        |       |       |       |       |       |       |       |       |      |      |      |      |      |       |      |      |       |      |       |       |      |       |      |      |      |      |       |      |       |      |      |      |      |          |    |   |   |    |    |  |    |   |     |  |  |    |    |    |      |    |  |        |  |  |                                    |    |    |    |  |           |     |       |       |      |      |  |       |       |  |      |  |  |      |  |       |      |       |     |  |      |  |      |      |     |     |  |  |  |  |  |  |  |    |  |  |  |  |  |  |  |       |      |  |  |  |  |  |  |  |  |  |  |
| <table border="1"> <thead> <tr> <th>Fragment-ion (m/z)</th> <th>70.065</th> <th>72.080</th> <th>84.043</th> <th>84.080</th> <th>86.096</th> <th>87.100</th> <th>101.071</th> <th>110.070</th> <th>120.080</th> <th>129.101</th> <th>143.117</th> <th>157.129</th> <th>175.118</th> <th>197.131</th> <th>214.154</th> <th>242.149</th> <th>322.168</th> <th>401.217</th> <th>479.265</th> <th>609.334</th> <th>634.677<sup>+3</sup></th> <th>640.677<sup>+3</sup></th> <th>643.348</th> <th>744.407</th> <th>831.434</th> </tr> </thead> <tbody> <tr> <td>Frac. Inten. (% of TIC)</td> <td>0.01</td> <td>0.21</td> <td>0.16</td> <td>0.47</td> <td>2.36</td> <td>3.66</td> <td>0.31</td> <td>0.26</td> <td>6.97</td> <td>0.15</td> <td>3.42</td> <td>3.78</td> <td>5.63</td> <td>4.04</td> <td>3.12</td> <td>8.03</td> <td>4.41</td> <td>17.51</td> <td>5.18</td> <td>3.77</td> <td>3.30</td> <td>5.99</td> <td>3.25</td> <td>6.37</td> <td>7.63</td> </tr> <tr> <td>Rel. Inten. (% of BP)</td> <td>0.04</td> <td>1.17</td> <td>0.90</td> <td>2.71</td> <td>13.47</td> <td>20.92</td> <td>1.47</td> <td>1.47</td> <td>39.81</td> <td>0.88</td> <td>19.56</td> <td>21.58</td> <td>32.17</td> <td>23.09</td> <td>17.85</td> <td>45.87</td> <td>25.21</td> <td>100.00</td> <td>29.60</td> <td>21.54</td> <td>18.85</td> <td>34.24</td> <td>18.55</td> <td>36.40</td> <td>43.61</td> </tr> <tr> <td>Score</td> <td>0.20</td> <td>0.50</td> <td>1.00</td> <td>0.50</td> <td>0.22</td> <td>-0.21</td> <td>0.50</td> <td>1.00</td> <td>-0.40</td> <td>0.20</td> <td>-0.20</td> <td>-0.22</td> <td>1.50</td> <td>-0.23</td> <td>0.50</td> <td>0.75</td> <td>1.50</td> <td>1.50</td> <td>-0.30</td> <td>0.75</td> <td>-0.19</td> <td>0.50</td> <td>1.50</td> <td>1.50</td> <td>1.50</td> </tr> <tr> <td>Ion-type</td> <td>PR</td> <td>V</td> <td>E</td> <td>KQ</td> <td>LI</td> <td></td> <td>a2</td> <td>H</td> <td>RKQ</td> <td></td> <td></td> <td>y1</td> <td>a3</td> <td>b3</td> <td>y++4</td> <td>y3</td> <td></td> <td>ITHTVG</td> <td></td> <td></td> <td>y17-H<sub>2</sub>O<sup>+3</sup></td> <td>y4</td> <td>y5</td> <td>y6</td> <td></td> </tr> <tr> <td>Delta ppm</td> <td>3.9</td> <td>-10.8</td> <td>-13.0</td> <td>-4.5</td> <td>-6.1</td> <td></td> <td>-13.2</td> <td>-11.6</td> <td></td> <td>-8.1</td> <td></td> <td></td> <td>-3.7</td> <td></td> <td>-10.7</td> <td>-7.1</td> <td>-37.7</td> <td>8.0</td> <td></td> <td>-4.4</td> <td></td> <td>-7.4</td> <td>-7.1</td> <td>9.3</td> <td>2.6</td> </tr> <tr> <td></td> <td></td> <td></td> <td></td> <td></td> <td></td> <td></td> <td>KQ</td> <td></td> <td></td> <td></td> <td></td> <td></td> <td></td> <td></td> <td>QL-28</td> <td>b++5</td> <td></td> </tr> </tbody> </table> |        |         |        |                  |                |                               |                                 |                            |                             |                    |         |             |                   |                                                                                             | Fragment-ion (m/z) | 70.065  | 72.080  | 84.043  | 84.080  | 86.096  | 87.100                             | 101.071               | 110.070 | 120.080 | 129.101 | 143.117 | 157.129 | 175.118 | 197.131 | 214.154 | 242.149 | 322.168 | 401.217 | 479.265 | 609.334 | 634.677 <sup>+3</sup> | 640.677 <sup>+3</sup> | 643.348 | 744.407 | 831.434 | Frac. Inten. (% of TIC) | 0.01 | 0.21 | 0.16 | 0.47 | 2.36 | 3.66 | 0.31 | 0.26 | 6.97 | 0.15 | 3.42 | 3.78 | 5.63 | 4.04 | 3.12 | 8.03 | 4.41 | 17.51 | 5.18 | 3.77 | 3.30 | 5.99 | 3.25 | 6.37 | 7.63 | Rel. Inten. (% of BP) | 0.04 | 1.17 | 0.90 | 2.71 | 13.47 | 20.92 | 1.47 | 1.47 | 39.81 | 0.88 | 19.56 | 21.58 | 32.17 | 23.09 | 17.85 | 45.87 | 25.21 | 100.00 | 29.60 | 21.54 | 18.85 | 34.24 | 18.55 | 36.40 | 43.61 | Score | 0.20 | 0.50 | 1.00 | 0.50 | 0.22 | -0.21 | 0.50 | 1.00 | -0.40 | 0.20 | -0.20 | -0.22 | 1.50 | -0.23 | 0.50 | 0.75 | 1.50 | 1.50 | -0.30 | 0.75 | -0.19 | 0.50 | 1.50 | 1.50 | 1.50 | Ion-type | PR | V | E | KQ | LI |  | a2 | H | RKQ |  |  | y1 | a3 | b3 | y++4 | y3 |  | ITHTVG |  |  | y17-H <sub>2</sub> O <sup>+3</sup> | y4 | y5 | y6 |  | Delta ppm | 3.9 | -10.8 | -13.0 | -4.5 | -6.1 |  | -13.2 | -11.6 |  | -8.1 |  |  | -3.7 |  | -10.7 | -7.1 | -37.7 | 8.0 |  | -4.4 |  | -7.4 | -7.1 | 9.3 | 2.6 |  |  |  |  |  |  |  | KQ |  |  |  |  |  |  |  | QL-28 | b++5 |  |  |  |  |  |  |  |  |  |  |
| Fragment-ion (m/z)                                                                                                                                                                                                                                                                                                                                                                                                                                                                                                                                                                                                                                                                                                                                                                                                                                                                                                                                                                                                                                                                                                                                                                                                                                                                                                                                                                                                                                                                                                                                                                                                                                                                                                                                                                                                                                                                                                                                                                                                                                                                                                                                                                                                                                                                                                                                                                                                                                                                                                                                                                                                                                                                                                                                                                                                                       | 70.065 | 72.080  | 84.043 | 84.080           | 86.096         | 87.100                        | 101.071                         | 110.070                    | 120.080                     | 129.101            | 143.117 | 157.129     | 175.118           | 197.131                                                                                     | 214.154            | 242.149 | 322.168 | 401.217 | 479.265 | 609.334 | 634.677 <sup>+3</sup>              | 640.677 <sup>+3</sup> | 643.348 | 744.407 | 831.434 |         |         |         |         |         |         |         |         |         |         |                       |                       |         |         |         |                         |      |      |      |      |      |      |      |      |      |      |      |      |      |      |      |      |      |       |      |      |      |      |      |      |      |                       |      |      |      |      |       |       |      |      |       |      |       |       |       |       |       |       |       |        |       |       |       |       |       |       |       |       |      |      |      |      |      |       |      |      |       |      |       |       |      |       |      |      |      |      |       |      |       |      |      |      |      |          |    |   |   |    |    |  |    |   |     |  |  |    |    |    |      |    |  |        |  |  |                                    |    |    |    |  |           |     |       |       |      |      |  |       |       |  |      |  |  |      |  |       |      |       |     |  |      |  |      |      |     |     |  |  |  |  |  |  |  |    |  |  |  |  |  |  |  |       |      |  |  |  |  |  |  |  |  |  |  |
| Frac. Inten. (% of TIC)                                                                                                                                                                                                                                                                                                                                                                                                                                                                                                                                                                                                                                                                                                                                                                                                                                                                                                                                                                                                                                                                                                                                                                                                                                                                                                                                                                                                                                                                                                                                                                                                                                                                                                                                                                                                                                                                                                                                                                                                                                                                                                                                                                                                                                                                                                                                                                                                                                                                                                                                                                                                                                                                                                                                                                                                                  | 0.01   | 0.21    | 0.16   | 0.47             | 2.36           | 3.66                          | 0.31                            | 0.26                       | 6.97                        | 0.15               | 3.42    | 3.78        | 5.63              | 4.04                                                                                        | 3.12               | 8.03    | 4.41    | 17.51   | 5.18    | 3.77    | 3.30                               | 5.99                  | 3.25    | 6.37    | 7.63    |         |         |         |         |         |         |         |         |         |         |                       |                       |         |         |         |                         |      |      |      |      |      |      |      |      |      |      |      |      |      |      |      |      |      |       |      |      |      |      |      |      |      |                       |      |      |      |      |       |       |      |      |       |      |       |       |       |       |       |       |       |        |       |       |       |       |       |       |       |       |      |      |      |      |      |       |      |      |       |      |       |       |      |       |      |      |      |      |       |      |       |      |      |      |      |          |    |   |   |    |    |  |    |   |     |  |  |    |    |    |      |    |  |        |  |  |                                    |    |    |    |  |           |     |       |       |      |      |  |       |       |  |      |  |  |      |  |       |      |       |     |  |      |  |      |      |     |     |  |  |  |  |  |  |  |    |  |  |  |  |  |  |  |       |      |  |  |  |  |  |  |  |  |  |  |
| Rel. Inten. (% of BP)                                                                                                                                                                                                                                                                                                                                                                                                                                                                                                                                                                                                                                                                                                                                                                                                                                                                                                                                                                                                                                                                                                                                                                                                                                                                                                                                                                                                                                                                                                                                                                                                                                                                                                                                                                                                                                                                                                                                                                                                                                                                                                                                                                                                                                                                                                                                                                                                                                                                                                                                                                                                                                                                                                                                                                                                                    | 0.04   | 1.17    | 0.90   | 2.71             | 13.47          | 20.92                         | 1.47                            | 1.47                       | 39.81                       | 0.88               | 19.56   | 21.58       | 32.17             | 23.09                                                                                       | 17.85              | 45.87   | 25.21   | 100.00  | 29.60   | 21.54   | 18.85                              | 34.24                 | 18.55   | 36.40   | 43.61   |         |         |         |         |         |         |         |         |         |         |                       |                       |         |         |         |                         |      |      |      |      |      |      |      |      |      |      |      |      |      |      |      |      |      |       |      |      |      |      |      |      |      |                       |      |      |      |      |       |       |      |      |       |      |       |       |       |       |       |       |       |        |       |       |       |       |       |       |       |       |      |      |      |      |      |       |      |      |       |      |       |       |      |       |      |      |      |      |       |      |       |      |      |      |      |          |    |   |   |    |    |  |    |   |     |  |  |    |    |    |      |    |  |        |  |  |                                    |    |    |    |  |           |     |       |       |      |      |  |       |       |  |      |  |  |      |  |       |      |       |     |  |      |  |      |      |     |     |  |  |  |  |  |  |  |    |  |  |  |  |  |  |  |       |      |  |  |  |  |  |  |  |  |  |  |
| Score                                                                                                                                                                                                                                                                                                                                                                                                                                                                                                                                                                                                                                                                                                                                                                                                                                                                                                                                                                                                                                                                                                                                                                                                                                                                                                                                                                                                                                                                                                                                                                                                                                                                                                                                                                                                                                                                                                                                                                                                                                                                                                                                                                                                                                                                                                                                                                                                                                                                                                                                                                                                                                                                                                                                                                                                                                    | 0.20   | 0.50    | 1.00   | 0.50             | 0.22           | -0.21                         | 0.50                            | 1.00                       | -0.40                       | 0.20               | -0.20   | -0.22       | 1.50              | -0.23                                                                                       | 0.50               | 0.75    | 1.50    | 1.50    | -0.30   | 0.75    | -0.19                              | 0.50                  | 1.50    | 1.50    | 1.50    |         |         |         |         |         |         |         |         |         |         |                       |                       |         |         |         |                         |      |      |      |      |      |      |      |      |      |      |      |      |      |      |      |      |      |       |      |      |      |      |      |      |      |                       |      |      |      |      |       |       |      |      |       |      |       |       |       |       |       |       |       |        |       |       |       |       |       |       |       |       |      |      |      |      |      |       |      |      |       |      |       |       |      |       |      |      |      |      |       |      |       |      |      |      |      |          |    |   |   |    |    |  |    |   |     |  |  |    |    |    |      |    |  |        |  |  |                                    |    |    |    |  |           |     |       |       |      |      |  |       |       |  |      |  |  |      |  |       |      |       |     |  |      |  |      |      |     |     |  |  |  |  |  |  |  |    |  |  |  |  |  |  |  |       |      |  |  |  |  |  |  |  |  |  |  |
| Ion-type                                                                                                                                                                                                                                                                                                                                                                                                                                                                                                                                                                                                                                                                                                                                                                                                                                                                                                                                                                                                                                                                                                                                                                                                                                                                                                                                                                                                                                                                                                                                                                                                                                                                                                                                                                                                                                                                                                                                                                                                                                                                                                                                                                                                                                                                                                                                                                                                                                                                                                                                                                                                                                                                                                                                                                                                                                 | PR     | V       | E      | KQ               | LI             |                               | a2                              | H                          | RKQ                         |                    |         | y1          | a3                | b3                                                                                          | y++4               | y3      |         | ITHTVG  |         |         | y17-H <sub>2</sub> O <sup>+3</sup> | y4                    | y5      | y6      |         |         |         |         |         |         |         |         |         |         |         |                       |                       |         |         |         |                         |      |      |      |      |      |      |      |      |      |      |      |      |      |      |      |      |      |       |      |      |      |      |      |      |      |                       |      |      |      |      |       |       |      |      |       |      |       |       |       |       |       |       |       |        |       |       |       |       |       |       |       |       |      |      |      |      |      |       |      |      |       |      |       |       |      |       |      |      |      |      |       |      |       |      |      |      |      |          |    |   |   |    |    |  |    |   |     |  |  |    |    |    |      |    |  |        |  |  |                                    |    |    |    |  |           |     |       |       |      |      |  |       |       |  |      |  |  |      |  |       |      |       |     |  |      |  |      |      |     |     |  |  |  |  |  |  |  |    |  |  |  |  |  |  |  |       |      |  |  |  |  |  |  |  |  |  |  |
| Delta ppm                                                                                                                                                                                                                                                                                                                                                                                                                                                                                                                                                                                                                                                                                                                                                                                                                                                                                                                                                                                                                                                                                                                                                                                                                                                                                                                                                                                                                                                                                                                                                                                                                                                                                                                                                                                                                                                                                                                                                                                                                                                                                                                                                                                                                                                                                                                                                                                                                                                                                                                                                                                                                                                                                                                                                                                                                                | 3.9    | -10.8   | -13.0  | -4.5             | -6.1           |                               | -13.2                           | -11.6                      |                             | -8.1               |         |             | -3.7              |                                                                                             | -10.7              | -7.1    | -37.7   | 8.0     |         | -4.4    |                                    | -7.4                  | -7.1    | 9.3     | 2.6     |         |         |         |         |         |         |         |         |         |         |                       |                       |         |         |         |                         |      |      |      |      |      |      |      |      |      |      |      |      |      |      |      |      |      |       |      |      |      |      |      |      |      |                       |      |      |      |      |       |       |      |      |       |      |       |       |       |       |       |       |       |        |       |       |       |       |       |       |       |       |      |      |      |      |      |       |      |      |       |      |       |       |      |       |      |      |      |      |       |      |       |      |      |      |      |          |    |   |   |    |    |  |    |   |     |  |  |    |    |    |      |    |  |        |  |  |                                    |    |    |    |  |           |     |       |       |      |      |  |       |       |  |      |  |  |      |  |       |      |       |     |  |      |  |      |      |     |     |  |  |  |  |  |  |  |    |  |  |  |  |  |  |  |       |      |  |  |  |  |  |  |  |  |  |  |
|                                                                                                                                                                                                                                                                                                                                                                                                                                                                                                                                                                                                                                                                                                                                                                                                                                                                                                                                                                                                                                                                                                                                                                                                                                                                                                                                                                                                                                                                                                                                                                                                                                                                                                                                                                                                                                                                                                                                                                                                                                                                                                                                                                                                                                                                                                                                                                                                                                                                                                                                                                                                                                                                                                                                                                                                                                          |        |         |        |                  |                |                               | KQ                              |                            |                             |                    |         |             |                   |                                                                                             | QL-28              | b++5    |         |         |         |         |                                    |                       |         |         |         |         |         |         |         |         |         |         |         |         |         |                       |                       |         |         |         |                         |      |      |      |      |      |      |      |      |      |      |      |      |      |      |      |      |      |       |      |      |      |      |      |      |      |                       |      |      |      |      |       |       |      |      |       |      |       |       |       |       |       |       |       |        |       |       |       |       |       |       |       |       |      |      |      |      |      |       |      |      |       |      |       |       |      |       |      |      |      |      |       |      |       |      |      |      |      |          |    |   |   |    |    |  |    |   |     |  |  |    |    |    |      |    |  |        |  |  |                                    |    |    |    |  |           |     |       |       |      |      |  |       |       |  |      |  |  |      |  |       |      |       |     |  |      |  |      |      |     |     |  |  |  |  |  |  |  |    |  |  |  |  |  |  |  |       |      |  |  |  |  |  |  |  |  |  |  |

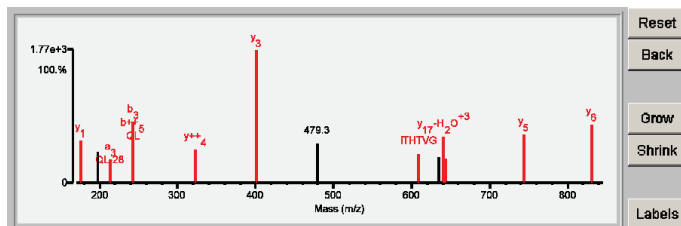

Result Summary

| Rank | Score | SPI (%) | BCS | # Unmatched Ions | Variable sites | Sequence                         | MH <sup>+</sup> Calculated (Da) | MH <sup>+</sup> Error (Da) | MH <sup>+</sup> Error (ppm) | Protein MW/pi (Da) | Species | Accession #            | Protein Name                                                      |
|------|-------|---------|-----|------------------|----------------|----------------------------------|---------------------------------|----------------------------|-----------------------------|--------------------|---------|------------------------|-------------------------------------------------------------------|
| 1    | 10.72 | 69.7    | 6   | 10/25            | K27k           | (K) <u>LPHSVLLEIQK</u> ELLDYK(G) | 2038.1583                       | 114.0587                   | 7.3                         | 40422.9/7.56       | HUMAN   | <a href="#">Q9Y617</a> | Phosphoserine aminotransferase OS=Homo sapiens GN=PSAT1 PE=1 SV=2 |

Detailed Results

| Rank                                                                                                                                                                                                                                                                                                                                                                                                                                                                                                                                                                                                                                                                                                                                                                                                                                                                                                                                                                                                                                                                                                                                                                                                                                                                                                                                                                                                                                                                                                                                                                                                                                                                                                                                                                                                                                                                                                                                                                                                                                                                                                                                                                                                                                                                                                                                                                                                                                                                                                                                                                                                                                                                                                                              | Score  | SPI (%) | BCS    | # Unmatched Ions | Variable sites | Sequence                                          | MH <sup>+</sup> Calculated (Da) | MH <sup>+</sup> Error (Da) | MH <sup>+</sup> Error (ppm) | Protein MW/pi (Da) | Species | Accession #            | MS-Digest Index #      | Protein Name                                                      |                    |         |         |         |         |         |         |         |         |         |          |         |         |         |         |         |         |         |         |         |         |         |         |         |         |          |                         |      |      |       |      |      |      |      |      |      |      |      |      |      |      |      |      |      |      |      |      |      |      |      |      |      |                       |      |      |        |      |      |      |       |      |      |       |      |       |       |       |      |       |       |      |      |       |      |      |       |       |       |       |      |      |      |  |  |      |      |      |       |      |       |       |      |      |       |       |      |       |       |      |       |       |       |      |      |          |   |    |    |    |   |     |        |   |  |    |  |  |    |    |  |  |    |  |  |    |  |  |  |    |    |           |       |     |       |      |  |       |      |     |  |       |  |  |      |       |  |  |     |  |  |  |  |  |  |       |     |  |  |  |  |    |  |  |  |  |  |  |  |  |  |  |  |  |  |  |  |        |  |  |  |  |  |
|-----------------------------------------------------------------------------------------------------------------------------------------------------------------------------------------------------------------------------------------------------------------------------------------------------------------------------------------------------------------------------------------------------------------------------------------------------------------------------------------------------------------------------------------------------------------------------------------------------------------------------------------------------------------------------------------------------------------------------------------------------------------------------------------------------------------------------------------------------------------------------------------------------------------------------------------------------------------------------------------------------------------------------------------------------------------------------------------------------------------------------------------------------------------------------------------------------------------------------------------------------------------------------------------------------------------------------------------------------------------------------------------------------------------------------------------------------------------------------------------------------------------------------------------------------------------------------------------------------------------------------------------------------------------------------------------------------------------------------------------------------------------------------------------------------------------------------------------------------------------------------------------------------------------------------------------------------------------------------------------------------------------------------------------------------------------------------------------------------------------------------------------------------------------------------------------------------------------------------------------------------------------------------------------------------------------------------------------------------------------------------------------------------------------------------------------------------------------------------------------------------------------------------------------------------------------------------------------------------------------------------------------------------------------------------------------------------------------------------------|--------|---------|--------|------------------|----------------|---------------------------------------------------|---------------------------------|----------------------------|-----------------------------|--------------------|---------|------------------------|------------------------|-------------------------------------------------------------------|--------------------|---------|---------|---------|---------|---------|---------|---------|---------|---------|----------|---------|---------|---------|---------|---------|---------|---------|---------|---------|---------|---------|---------|---------|---------|----------|-------------------------|------|------|-------|------|------|------|------|------|------|------|------|------|------|------|------|------|------|------|------|------|------|------|------|------|------|-----------------------|------|------|--------|------|------|------|-------|------|------|-------|------|-------|-------|-------|------|-------|-------|------|------|-------|------|------|-------|-------|-------|-------|------|------|------|--|--|------|------|------|-------|------|-------|-------|------|------|-------|-------|------|-------|-------|------|-------|-------|-------|------|------|----------|---|----|----|----|---|-----|--------|---|--|----|--|--|----|----|--|--|----|--|--|----|--|--|--|----|----|-----------|-------|-----|-------|------|--|-------|------|-----|--|-------|--|--|------|-------|--|--|-----|--|--|--|--|--|--|-------|-----|--|--|--|--|----|--|--|--|--|--|--|--|--|--|--|--|--|--|--|--|--------|--|--|--|--|--|
| 1                                                                                                                                                                                                                                                                                                                                                                                                                                                                                                                                                                                                                                                                                                                                                                                                                                                                                                                                                                                                                                                                                                                                                                                                                                                                                                                                                                                                                                                                                                                                                                                                                                                                                                                                                                                                                                                                                                                                                                                                                                                                                                                                                                                                                                                                                                                                                                                                                                                                                                                                                                                                                                                                                                                                 | 10.72  | 69.7    | 6      | 10/25            | K27k           | (K) L P H S V L L E I Q / K / E L L / D / Y K (G) | 2038.1583                       | 114.0587                   | 7.3                         | 40422.9/7.56       | HUMAN   | <a href="#">Q9Y617</a> | <a href="#">716561</a> | Phosphoserine aminotransferase OS=Homo sapiens GN=PSAT1 PE=1 SV=2 |                    |         |         |         |         |         |         |         |         |         |          |         |         |         |         |         |         |         |         |         |         |         |         |         |         |          |                         |      |      |       |      |      |      |      |      |      |      |      |      |      |      |      |      |      |      |      |      |      |      |      |      |      |                       |      |      |        |      |      |      |       |      |      |       |      |       |       |       |      |       |       |      |      |       |      |      |       |       |       |       |      |      |      |  |  |      |      |      |       |      |       |       |      |      |       |       |      |       |       |      |       |       |       |      |      |          |   |    |    |    |   |     |        |   |  |    |  |  |    |    |  |  |    |  |  |    |  |  |  |    |    |           |       |     |       |      |  |       |      |     |  |       |  |  |      |       |  |  |     |  |  |  |  |  |  |       |     |  |  |  |  |    |  |  |  |  |  |  |  |  |  |  |  |  |  |  |  |        |  |  |  |  |  |
| <table border="1"> <thead> <tr> <th>Fragment-ion (m/z)</th> <th>84.042</th> <th>84.081</th> <th>86.096</th> <th>101.070</th> <th>102.053</th> <th>129.101</th> <th>130.088</th> <th>136.076</th> <th>146.125</th> <th>243.130</th> <th>272.141</th> <th>292.184</th> <th>310.182</th> <th>348.192</th> <th>368.164</th> <th>388.720</th> <th>425.206</th> <th>567.299</th> <th>601.389</th> <th>647.397</th> <th>652.313</th> <th>680.370</th> <th>758.390</th> <th>780.406</th> <th>1022.553</th> </tr> </thead> <tbody> <tr> <td>Frac. Inten. (% of TIC)</td> <td>0.22</td> <td>0.21</td> <td>30.80</td> <td>0.09</td> <td>0.16</td> <td>0.13</td> <td>3.39</td> <td>0.16</td> <td>2.98</td> <td>3.13</td> <td>2.71</td> <td>3.88</td> <td>8.43</td> <td>3.13</td> <td>2.71</td> <td>3.33</td> <td>5.20</td> <td>2.81</td> <td>2.91</td> <td>4.13</td> <td>2.79</td> <td>3.07</td> <td>3.11</td> <td>7.20</td> <td>3.34</td> </tr> <tr> <td>Rel. Inten. (% of BP)</td> <td>0.71</td> <td>0.68</td> <td>100.00</td> <td>0.29</td> <td>0.51</td> <td>0.41</td> <td>11.01</td> <td>0.53</td> <td>9.68</td> <td>10.15</td> <td>8.80</td> <td>12.61</td> <td>27.38</td> <td>10.15</td> <td>8.80</td> <td>10.83</td> <td>16.88</td> <td>9.11</td> <td>9.44</td> <td>13.40</td> <td>9.05</td> <td>9.97</td> <td>10.11</td> <td>23.38</td> <td>10.84</td> </tr> <tr> <td>Score</td> <td>1.00</td> <td>0.50</td> <td>0.50</td> <td></td> <td></td> <td>0.20</td> <td>0.50</td> <td>1.00</td> <td>-0.10</td> <td>0.75</td> <td>-0.09</td> <td>-0.13</td> <td>1.50</td> <td>0.50</td> <td>-0.09</td> <td>-0.11</td> <td>1.50</td> <td>-0.09</td> <td>-0.09</td> <td>0.75</td> <td>-0.09</td> <td>-0.10</td> <td>-0.10</td> <td>1.50</td> <td>1.50</td> </tr> <tr> <td>Ion-type</td> <td>E</td> <td>KQ</td> <td>a1</td> <td>KQ</td> <td>E</td> <td>RKQ</td> <td>y1-NH3</td> <td>Y</td> <td></td> <td>EL</td> <td></td> <td></td> <td>y2</td> <td>b3</td> <td></td> <td></td> <td>y3</td> <td></td> <td></td> <td>b6</td> <td></td> <td></td> <td></td> <td>y6</td> <td>y7</td> </tr> <tr> <td>Delta ppm</td> <td>-27.2</td> <td>1.5</td> <td>-14.2</td> <td>0.50</td> <td></td> <td>-10.4</td> <td>10.3</td> <td>4.5</td> <td></td> <td>-19.0</td> <td></td> <td></td> <td>18.3</td> <td>-34.2</td> <td></td> <td></td> <td>7.8</td> <td></td> <td></td> <td></td> <td></td> <td></td> <td></td> <td>-10.0</td> <td>0.9</td> </tr> <tr> <td></td> <td></td> <td></td> <td></td> <td>LI</td> <td></td> <td>PHSVLL</td> <td></td> <td></td> <td></td> <td></td> <td></td> </tr> </tbody> </table> |        |         |        |                  |                |                                                   |                                 |                            |                             |                    |         |                        |                        |                                                                   | Fragment-ion (m/z) | 84.042  | 84.081  | 86.096  | 101.070 | 102.053 | 129.101 | 130.088 | 136.076 | 146.125 | 243.130  | 272.141 | 292.184 | 310.182 | 348.192 | 368.164 | 388.720 | 425.206 | 567.299 | 601.389 | 647.397 | 652.313 | 680.370 | 758.390 | 780.406 | 1022.553 | Frac. Inten. (% of TIC) | 0.22 | 0.21 | 30.80 | 0.09 | 0.16 | 0.13 | 3.39 | 0.16 | 2.98 | 3.13 | 2.71 | 3.88 | 8.43 | 3.13 | 2.71 | 3.33 | 5.20 | 2.81 | 2.91 | 4.13 | 2.79 | 3.07 | 3.11 | 7.20 | 3.34 | Rel. Inten. (% of BP) | 0.71 | 0.68 | 100.00 | 0.29 | 0.51 | 0.41 | 11.01 | 0.53 | 9.68 | 10.15 | 8.80 | 12.61 | 27.38 | 10.15 | 8.80 | 10.83 | 16.88 | 9.11 | 9.44 | 13.40 | 9.05 | 9.97 | 10.11 | 23.38 | 10.84 | Score | 1.00 | 0.50 | 0.50 |  |  | 0.20 | 0.50 | 1.00 | -0.10 | 0.75 | -0.09 | -0.13 | 1.50 | 0.50 | -0.09 | -0.11 | 1.50 | -0.09 | -0.09 | 0.75 | -0.09 | -0.10 | -0.10 | 1.50 | 1.50 | Ion-type | E | KQ | a1 | KQ | E | RKQ | y1-NH3 | Y |  | EL |  |  | y2 | b3 |  |  | y3 |  |  | b6 |  |  |  | y6 | y7 | Delta ppm | -27.2 | 1.5 | -14.2 | 0.50 |  | -10.4 | 10.3 | 4.5 |  | -19.0 |  |  | 18.3 | -34.2 |  |  | 7.8 |  |  |  |  |  |  | -10.0 | 0.9 |  |  |  |  | LI |  |  |  |  |  |  |  |  |  |  |  |  |  |  |  | PHSVLL |  |  |  |  |  |
| Fragment-ion (m/z)                                                                                                                                                                                                                                                                                                                                                                                                                                                                                                                                                                                                                                                                                                                                                                                                                                                                                                                                                                                                                                                                                                                                                                                                                                                                                                                                                                                                                                                                                                                                                                                                                                                                                                                                                                                                                                                                                                                                                                                                                                                                                                                                                                                                                                                                                                                                                                                                                                                                                                                                                                                                                                                                                                                | 84.042 | 84.081  | 86.096 | 101.070          | 102.053        | 129.101                                           | 130.088                         | 136.076                    | 146.125                     | 243.130            | 272.141 | 292.184                | 310.182                | 348.192                                                           | 368.164            | 388.720 | 425.206 | 567.299 | 601.389 | 647.397 | 652.313 | 680.370 | 758.390 | 780.406 | 1022.553 |         |         |         |         |         |         |         |         |         |         |         |         |         |         |          |                         |      |      |       |      |      |      |      |      |      |      |      |      |      |      |      |      |      |      |      |      |      |      |      |      |      |                       |      |      |        |      |      |      |       |      |      |       |      |       |       |       |      |       |       |      |      |       |      |      |       |       |       |       |      |      |      |  |  |      |      |      |       |      |       |       |      |      |       |       |      |       |       |      |       |       |       |      |      |          |   |    |    |    |   |     |        |   |  |    |  |  |    |    |  |  |    |  |  |    |  |  |  |    |    |           |       |     |       |      |  |       |      |     |  |       |  |  |      |       |  |  |     |  |  |  |  |  |  |       |     |  |  |  |  |    |  |  |  |  |  |  |  |  |  |  |  |  |  |  |  |        |  |  |  |  |  |
| Frac. Inten. (% of TIC)                                                                                                                                                                                                                                                                                                                                                                                                                                                                                                                                                                                                                                                                                                                                                                                                                                                                                                                                                                                                                                                                                                                                                                                                                                                                                                                                                                                                                                                                                                                                                                                                                                                                                                                                                                                                                                                                                                                                                                                                                                                                                                                                                                                                                                                                                                                                                                                                                                                                                                                                                                                                                                                                                                           | 0.22   | 0.21    | 30.80  | 0.09             | 0.16           | 0.13                                              | 3.39                            | 0.16                       | 2.98                        | 3.13               | 2.71    | 3.88                   | 8.43                   | 3.13                                                              | 2.71               | 3.33    | 5.20    | 2.81    | 2.91    | 4.13    | 2.79    | 3.07    | 3.11    | 7.20    | 3.34     |         |         |         |         |         |         |         |         |         |         |         |         |         |         |          |                         |      |      |       |      |      |      |      |      |      |      |      |      |      |      |      |      |      |      |      |      |      |      |      |      |      |                       |      |      |        |      |      |      |       |      |      |       |      |       |       |       |      |       |       |      |      |       |      |      |       |       |       |       |      |      |      |  |  |      |      |      |       |      |       |       |      |      |       |       |      |       |       |      |       |       |       |      |      |          |   |    |    |    |   |     |        |   |  |    |  |  |    |    |  |  |    |  |  |    |  |  |  |    |    |           |       |     |       |      |  |       |      |     |  |       |  |  |      |       |  |  |     |  |  |  |  |  |  |       |     |  |  |  |  |    |  |  |  |  |  |  |  |  |  |  |  |  |  |  |  |        |  |  |  |  |  |
| Rel. Inten. (% of BP)                                                                                                                                                                                                                                                                                                                                                                                                                                                                                                                                                                                                                                                                                                                                                                                                                                                                                                                                                                                                                                                                                                                                                                                                                                                                                                                                                                                                                                                                                                                                                                                                                                                                                                                                                                                                                                                                                                                                                                                                                                                                                                                                                                                                                                                                                                                                                                                                                                                                                                                                                                                                                                                                                                             | 0.71   | 0.68    | 100.00 | 0.29             | 0.51           | 0.41                                              | 11.01                           | 0.53                       | 9.68                        | 10.15              | 8.80    | 12.61                  | 27.38                  | 10.15                                                             | 8.80               | 10.83   | 16.88   | 9.11    | 9.44    | 13.40   | 9.05    | 9.97    | 10.11   | 23.38   | 10.84    |         |         |         |         |         |         |         |         |         |         |         |         |         |         |          |                         |      |      |       |      |      |      |      |      |      |      |      |      |      |      |      |      |      |      |      |      |      |      |      |      |      |                       |      |      |        |      |      |      |       |      |      |       |      |       |       |       |      |       |       |      |      |       |      |      |       |       |       |       |      |      |      |  |  |      |      |      |       |      |       |       |      |      |       |       |      |       |       |      |       |       |       |      |      |          |   |    |    |    |   |     |        |   |  |    |  |  |    |    |  |  |    |  |  |    |  |  |  |    |    |           |       |     |       |      |  |       |      |     |  |       |  |  |      |       |  |  |     |  |  |  |  |  |  |       |     |  |  |  |  |    |  |  |  |  |  |  |  |  |  |  |  |  |  |  |  |        |  |  |  |  |  |
| Score                                                                                                                                                                                                                                                                                                                                                                                                                                                                                                                                                                                                                                                                                                                                                                                                                                                                                                                                                                                                                                                                                                                                                                                                                                                                                                                                                                                                                                                                                                                                                                                                                                                                                                                                                                                                                                                                                                                                                                                                                                                                                                                                                                                                                                                                                                                                                                                                                                                                                                                                                                                                                                                                                                                             | 1.00   | 0.50    | 0.50   |                  |                | 0.20                                              | 0.50                            | 1.00                       | -0.10                       | 0.75               | -0.09   | -0.13                  | 1.50                   | 0.50                                                              | -0.09              | -0.11   | 1.50    | -0.09   | -0.09   | 0.75    | -0.09   | -0.10   | -0.10   | 1.50    | 1.50     |         |         |         |         |         |         |         |         |         |         |         |         |         |         |          |                         |      |      |       |      |      |      |      |      |      |      |      |      |      |      |      |      |      |      |      |      |      |      |      |      |      |                       |      |      |        |      |      |      |       |      |      |       |      |       |       |       |      |       |       |      |      |       |      |      |       |       |       |       |      |      |      |  |  |      |      |      |       |      |       |       |      |      |       |       |      |       |       |      |       |       |       |      |      |          |   |    |    |    |   |     |        |   |  |    |  |  |    |    |  |  |    |  |  |    |  |  |  |    |    |           |       |     |       |      |  |       |      |     |  |       |  |  |      |       |  |  |     |  |  |  |  |  |  |       |     |  |  |  |  |    |  |  |  |  |  |  |  |  |  |  |  |  |  |  |  |        |  |  |  |  |  |
| Ion-type                                                                                                                                                                                                                                                                                                                                                                                                                                                                                                                                                                                                                                                                                                                                                                                                                                                                                                                                                                                                                                                                                                                                                                                                                                                                                                                                                                                                                                                                                                                                                                                                                                                                                                                                                                                                                                                                                                                                                                                                                                                                                                                                                                                                                                                                                                                                                                                                                                                                                                                                                                                                                                                                                                                          | E      | KQ      | a1     | KQ               | E              | RKQ                                               | y1-NH3                          | Y                          |                             | EL                 |         |                        | y2                     | b3                                                                |                    |         | y3      |         |         | b6      |         |         |         | y6      | y7       |         |         |         |         |         |         |         |         |         |         |         |         |         |         |          |                         |      |      |       |      |      |      |      |      |      |      |      |      |      |      |      |      |      |      |      |      |      |      |      |      |      |                       |      |      |        |      |      |      |       |      |      |       |      |       |       |       |      |       |       |      |      |       |      |      |       |       |       |       |      |      |      |  |  |      |      |      |       |      |       |       |      |      |       |       |      |       |       |      |       |       |       |      |      |          |   |    |    |    |   |     |        |   |  |    |  |  |    |    |  |  |    |  |  |    |  |  |  |    |    |           |       |     |       |      |  |       |      |     |  |       |  |  |      |       |  |  |     |  |  |  |  |  |  |       |     |  |  |  |  |    |  |  |  |  |  |  |  |  |  |  |  |  |  |  |  |        |  |  |  |  |  |
| Delta ppm                                                                                                                                                                                                                                                                                                                                                                                                                                                                                                                                                                                                                                                                                                                                                                                                                                                                                                                                                                                                                                                                                                                                                                                                                                                                                                                                                                                                                                                                                                                                                                                                                                                                                                                                                                                                                                                                                                                                                                                                                                                                                                                                                                                                                                                                                                                                                                                                                                                                                                                                                                                                                                                                                                                         | -27.2  | 1.5     | -14.2  | 0.50             |                | -10.4                                             | 10.3                            | 4.5                        |                             | -19.0              |         |                        | 18.3                   | -34.2                                                             |                    |         | 7.8     |         |         |         |         |         |         | -10.0   | 0.9      |         |         |         |         |         |         |         |         |         |         |         |         |         |         |          |                         |      |      |       |      |      |      |      |      |      |      |      |      |      |      |      |      |      |      |      |      |      |      |      |      |      |                       |      |      |        |      |      |      |       |      |      |       |      |       |       |       |      |       |       |      |      |       |      |      |       |       |       |       |      |      |      |  |  |      |      |      |       |      |       |       |      |      |       |       |      |       |       |      |       |       |       |      |      |          |   |    |    |    |   |     |        |   |  |    |  |  |    |    |  |  |    |  |  |    |  |  |  |    |    |           |       |     |       |      |  |       |      |     |  |       |  |  |      |       |  |  |     |  |  |  |  |  |  |       |     |  |  |  |  |    |  |  |  |  |  |  |  |  |  |  |  |  |  |  |  |        |  |  |  |  |  |
|                                                                                                                                                                                                                                                                                                                                                                                                                                                                                                                                                                                                                                                                                                                                                                                                                                                                                                                                                                                                                                                                                                                                                                                                                                                                                                                                                                                                                                                                                                                                                                                                                                                                                                                                                                                                                                                                                                                                                                                                                                                                                                                                                                                                                                                                                                                                                                                                                                                                                                                                                                                                                                                                                                                                   |        |         |        | LI               |                |                                                   |                                 |                            |                             |                    |         |                        |                        |                                                                   |                    |         |         |         |         | PHSVLL  |         |         |         |         |          |         |         |         |         |         |         |         |         |         |         |         |         |         |         |          |                         |      |      |       |      |      |      |      |      |      |      |      |      |      |      |      |      |      |      |      |      |      |      |      |      |      |                       |      |      |        |      |      |      |       |      |      |       |      |       |       |       |      |       |       |      |      |       |      |      |       |       |       |       |      |      |      |  |  |      |      |      |       |      |       |       |      |      |       |       |      |       |       |      |       |       |       |      |      |          |   |    |    |    |   |     |        |   |  |    |  |  |    |    |  |  |    |  |  |    |  |  |  |    |    |           |       |     |       |      |  |       |      |     |  |       |  |  |      |       |  |  |     |  |  |  |  |  |  |       |     |  |  |  |  |    |  |  |  |  |  |  |  |  |  |  |  |  |  |  |  |        |  |  |  |  |  |

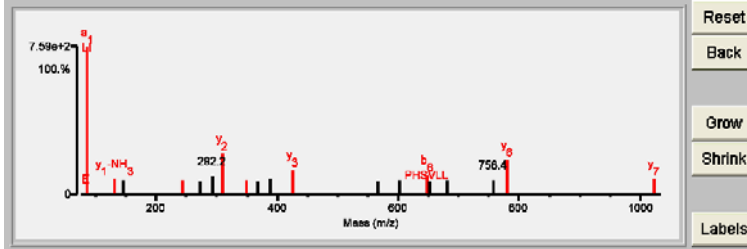

Result Summary

| Rank | Score | SPI (%) | BCS | # Unmatched Ions | Variable sites | Sequence             | MH <sup>+</sup> Calculated (Da) | MH <sup>+</sup> Error (Da) | MH <sup>+</sup> Error (ppm) | Protein MW/pi (Da) | Species | Accession # | Protein Name                                                      |
|------|-------|---------|-----|------------------|----------------|----------------------|---------------------------------|----------------------------|-----------------------------|--------------------|---------|-------------|-------------------------------------------------------------------|
| 1    | 22.94 | 97.4    | 9   | 1/25             | K323k          | (R)FLDKALELNMLSLK(G) | 1634.9186                       | 114.0688                   | 14.8                        | 40422.9/7.56       | HUMAN   | Q9Y617      | Phosphoserine aminotransferase OS=Homo sapiens GN=PSAT1 PE=1 SV=2 |
| 2    | 8.53  | 52.4    | 4   | 11/25            | K333k          | (R)FLDKALELNMLSLK(G) | 1634.9186                       | 114.0688                   | 14.8                        | 40422.9/7.56       | HUMAN   | Q9Y617      | Phosphoserine aminotransferase OS=Homo sapiens GN=PSAT1 PE=1 SV=2 |

Detailed Results

| Rank                                                                                                                                                                                                                                                                                                                                                                                                                                                                                                                                                                                                                                                                                                                                                                                                                                                                                                                                                                                                                                                                                                                                                                                                                                                                                                                                                                                                                                                                                                                                                                                                                                                                                                                                                                                                                                                                                                                                                                                                                                                                                                                                                                                                                                                                                                                                                                                                                                                                                                                                                        | Score  | SPI (%) | BCS     | # Unmatched Ions | Variable sites | Sequence                            | MH <sup>+</sup> Calculated (Da) | MH <sup>+</sup> Error (Da) | MH <sup>+</sup> Error (ppm) | Protein MW/pi (Da) | Species | Accession # | MS-Digest Index # | Protein Name                                                      |                    |         |         |         |         |         |         |                       |                   |         |         |         |         |         |         |         |         |         |         |         |         |         |                       |         |         |         |                         |      |      |      |      |      |      |      |      |      |       |      |      |      |      |      |      |      |      |      |      |       |      |      |      |      |                       |      |      |      |      |       |      |       |       |       |        |       |       |       |       |       |       |       |       |       |       |       |       |       |       |       |       |      |      |      |      |       |      |      |      |      |      |      |      |      |      |      |      |      |      |      |      |      |      |      |      |      |          |    |    |   |    |  |     |        |    |    |    |    |         |    |     |      |    |      |    |        |    |        |    |                   |    |    |    |           |     |     |     |      |  |      |     |     |     |     |     |      |     |      |      |     |     |     |      |      |      |      |     |      |     |
|-------------------------------------------------------------------------------------------------------------------------------------------------------------------------------------------------------------------------------------------------------------------------------------------------------------------------------------------------------------------------------------------------------------------------------------------------------------------------------------------------------------------------------------------------------------------------------------------------------------------------------------------------------------------------------------------------------------------------------------------------------------------------------------------------------------------------------------------------------------------------------------------------------------------------------------------------------------------------------------------------------------------------------------------------------------------------------------------------------------------------------------------------------------------------------------------------------------------------------------------------------------------------------------------------------------------------------------------------------------------------------------------------------------------------------------------------------------------------------------------------------------------------------------------------------------------------------------------------------------------------------------------------------------------------------------------------------------------------------------------------------------------------------------------------------------------------------------------------------------------------------------------------------------------------------------------------------------------------------------------------------------------------------------------------------------------------------------------------------------------------------------------------------------------------------------------------------------------------------------------------------------------------------------------------------------------------------------------------------------------------------------------------------------------------------------------------------------------------------------------------------------------------------------------------------------|--------|---------|---------|------------------|----------------|-------------------------------------|---------------------------------|----------------------------|-----------------------------|--------------------|---------|-------------|-------------------|-------------------------------------------------------------------|--------------------|---------|---------|---------|---------|---------|---------|-----------------------|-------------------|---------|---------|---------|---------|---------|---------|---------|---------|---------|---------|---------|---------|---------|-----------------------|---------|---------|---------|-------------------------|------|------|------|------|------|------|------|------|------|-------|------|------|------|------|------|------|------|------|------|------|-------|------|------|------|------|-----------------------|------|------|------|------|-------|------|-------|-------|-------|--------|-------|-------|-------|-------|-------|-------|-------|-------|-------|-------|-------|-------|-------|-------|-------|-------|------|------|------|------|-------|------|------|------|------|------|------|------|------|------|------|------|------|------|------|------|------|------|------|------|------|----------|----|----|---|----|--|-----|--------|----|----|----|----|---------|----|-----|------|----|------|----|--------|----|--------|----|-------------------|----|----|----|-----------|-----|-----|-----|------|--|------|-----|-----|-----|-----|-----|------|-----|------|------|-----|-----|-----|------|------|------|------|-----|------|-----|
| 1                                                                                                                                                                                                                                                                                                                                                                                                                                                                                                                                                                                                                                                                                                                                                                                                                                                                                                                                                                                                                                                                                                                                                                                                                                                                                                                                                                                                                                                                                                                                                                                                                                                                                                                                                                                                                                                                                                                                                                                                                                                                                                                                                                                                                                                                                                                                                                                                                                                                                                                                                           | 22.94  | 97.4    | 9       | 1/25             | K323k          | (R) F L/D/K A L/E/L/N/M/L/S L/K (G) | 1634.9186                       | 114.0688                   | 14.8                        | 40422.9/7.56       | HUMAN   | Q9Y617      | 716561            | Phosphoserine aminotransferase OS=Homo sapiens GN=PSAT1 PE=1 SV=2 |                    |         |         |         |         |         |         |                       |                   |         |         |         |         |         |         |         |         |         |         |         |         |         |                       |         |         |         |                         |      |      |      |      |      |      |      |      |      |       |      |      |      |      |      |      |      |      |      |      |       |      |      |      |      |                       |      |      |      |      |       |      |       |       |       |        |       |       |       |       |       |       |       |       |       |       |       |       |       |       |       |       |      |      |      |      |       |      |      |      |      |      |      |      |      |      |      |      |      |      |      |      |      |      |      |      |      |          |    |    |   |    |  |     |        |    |    |    |    |         |    |     |      |    |      |    |        |    |        |    |                   |    |    |    |           |     |     |     |      |  |      |     |     |     |     |     |      |     |      |      |     |     |     |      |      |      |      |     |      |     |
| <table border="1"> <thead> <tr> <th>Fragment-ion (m/z)</th> <th>84.081</th> <th>86.097</th> <th>102.055</th> <th>120.081</th> <th>121.085</th> <th>129.102</th> <th>130.087</th> <th>147.113</th> <th>228.136</th> <th>233.166</th> <th>261.163</th> <th>339.172</th> <th>347.232</th> <th>357.182</th> <th>427.261</th> <th>460.317</th> <th>542.298</th> <th>591.359</th> <th>671.347</th> <th>687.402</th> <th>705.405</th> <th>744.918<sup>+2</sup></th> <th>818.486</th> <th>931.503</th> <th>947.532</th> </tr> </thead> <tbody> <tr> <td>Frac. Inten. (% of TIC)</td> <td>0.48</td> <td>0.94</td> <td>0.09</td> <td>0.83</td> <td>2.64</td> <td>0.09</td> <td>2.63</td> <td>4.54</td> <td>2.21</td> <td>11.49</td> <td>3.73</td> <td>3.42</td> <td>7.65</td> <td>4.65</td> <td>5.73</td> <td>5.06</td> <td>2.46</td> <td>4.98</td> <td>2.15</td> <td>5.06</td> <td>10.43</td> <td>3.29</td> <td>7.42</td> <td>3.24</td> <td>4.77</td> </tr> <tr> <td>Rel. Inten. (% of BP)</td> <td>4.19</td> <td>8.16</td> <td>0.81</td> <td>7.26</td> <td>22.99</td> <td>0.74</td> <td>22.90</td> <td>39.52</td> <td>19.25</td> <td>100.00</td> <td>32.44</td> <td>29.74</td> <td>66.62</td> <td>40.52</td> <td>49.91</td> <td>44.08</td> <td>21.46</td> <td>43.36</td> <td>18.72</td> <td>44.08</td> <td>90.83</td> <td>28.66</td> <td>64.56</td> <td>28.22</td> <td>41.56</td> </tr> <tr> <td>Score</td> <td>0.50</td> <td>0.22</td> <td>1.00</td> <td>1.00</td> <td>-0.23</td> <td>0.20</td> <td>0.50</td> <td>1.50</td> <td>0.75</td> <td>0.50</td> <td>0.50</td> <td>0.50</td> <td>1.50</td> <td>0.75</td> <td>0.75</td> <td>1.50</td> <td>0.75</td> <td>1.50</td> <td>0.75</td> <td>1.50</td> <td>1.50</td> <td>1.50</td> <td>1.50</td> <td>0.50</td> <td>1.50</td> </tr> <tr> <td>Ion-type</td> <td>KQ</td> <td>LI</td> <td>E</td> <td>a1</td> <td></td> <td>RKQ</td> <td>y1-NH3</td> <td>y1</td> <td>LN</td> <td>a2</td> <td>b2</td> <td>ELN+H2O</td> <td>y3</td> <td>ELN</td> <td>ALEL</td> <td>y4</td> <td>DkAL</td> <td>y5</td> <td>b5-H2O</td> <td>y5</td> <td>y6-H2O</td> <td>y6</td> <td>y12<sup>+2</sup></td> <td>y7</td> <td>b7</td> <td>y8</td> </tr> <tr> <td>Delta ppm</td> <td>3.9</td> <td>0.9</td> <td>0.4</td> <td>-9.8</td> <td></td> <td>-1.1</td> <td>7.3</td> <td>2.0</td> <td>0.6</td> <td>1.1</td> <td>6.7</td> <td>14.8</td> <td>9.2</td> <td>10.8</td> <td>11.7</td> <td>8.8</td> <td>5.9</td> <td>9.4</td> <td>-7.8</td> <td>10.6</td> <td>12.5</td> <td>13.5</td> <td>7.4</td> <td>14.6</td> <td>9.4</td> </tr> </tbody> </table> |        |         |         |                  |                |                                     |                                 |                            |                             |                    |         |             |                   |                                                                   | Fragment-ion (m/z) | 84.081  | 86.097  | 102.055 | 120.081 | 121.085 | 129.102 | 130.087               | 147.113           | 228.136 | 233.166 | 261.163 | 339.172 | 347.232 | 357.182 | 427.261 | 460.317 | 542.298 | 591.359 | 671.347 | 687.402 | 705.405 | 744.918 <sup>+2</sup> | 818.486 | 931.503 | 947.532 | Frac. Inten. (% of TIC) | 0.48 | 0.94 | 0.09 | 0.83 | 2.64 | 0.09 | 2.63 | 4.54 | 2.21 | 11.49 | 3.73 | 3.42 | 7.65 | 4.65 | 5.73 | 5.06 | 2.46 | 4.98 | 2.15 | 5.06 | 10.43 | 3.29 | 7.42 | 3.24 | 4.77 | Rel. Inten. (% of BP) | 4.19 | 8.16 | 0.81 | 7.26 | 22.99 | 0.74 | 22.90 | 39.52 | 19.25 | 100.00 | 32.44 | 29.74 | 66.62 | 40.52 | 49.91 | 44.08 | 21.46 | 43.36 | 18.72 | 44.08 | 90.83 | 28.66 | 64.56 | 28.22 | 41.56 | Score | 0.50 | 0.22 | 1.00 | 1.00 | -0.23 | 0.20 | 0.50 | 1.50 | 0.75 | 0.50 | 0.50 | 0.50 | 1.50 | 0.75 | 0.75 | 1.50 | 0.75 | 1.50 | 0.75 | 1.50 | 1.50 | 1.50 | 1.50 | 0.50 | 1.50 | Ion-type | KQ | LI | E | a1 |  | RKQ | y1-NH3 | y1 | LN | a2 | b2 | ELN+H2O | y3 | ELN | ALEL | y4 | DkAL | y5 | b5-H2O | y5 | y6-H2O | y6 | y12 <sup>+2</sup> | y7 | b7 | y8 | Delta ppm | 3.9 | 0.9 | 0.4 | -9.8 |  | -1.1 | 7.3 | 2.0 | 0.6 | 1.1 | 6.7 | 14.8 | 9.2 | 10.8 | 11.7 | 8.8 | 5.9 | 9.4 | -7.8 | 10.6 | 12.5 | 13.5 | 7.4 | 14.6 | 9.4 |
| Fragment-ion (m/z)                                                                                                                                                                                                                                                                                                                                                                                                                                                                                                                                                                                                                                                                                                                                                                                                                                                                                                                                                                                                                                                                                                                                                                                                                                                                                                                                                                                                                                                                                                                                                                                                                                                                                                                                                                                                                                                                                                                                                                                                                                                                                                                                                                                                                                                                                                                                                                                                                                                                                                                                          | 84.081 | 86.097  | 102.055 | 120.081          | 121.085        | 129.102                             | 130.087                         | 147.113                    | 228.136                     | 233.166            | 261.163 | 339.172     | 347.232           | 357.182                                                           | 427.261            | 460.317 | 542.298 | 591.359 | 671.347 | 687.402 | 705.405 | 744.918 <sup>+2</sup> | 818.486           | 931.503 | 947.532 |         |         |         |         |         |         |         |         |         |         |         |                       |         |         |         |                         |      |      |      |      |      |      |      |      |      |       |      |      |      |      |      |      |      |      |      |      |       |      |      |      |      |                       |      |      |      |      |       |      |       |       |       |        |       |       |       |       |       |       |       |       |       |       |       |       |       |       |       |       |      |      |      |      |       |      |      |      |      |      |      |      |      |      |      |      |      |      |      |      |      |      |      |      |      |          |    |    |   |    |  |     |        |    |    |    |    |         |    |     |      |    |      |    |        |    |        |    |                   |    |    |    |           |     |     |     |      |  |      |     |     |     |     |     |      |     |      |      |     |     |     |      |      |      |      |     |      |     |
| Frac. Inten. (% of TIC)                                                                                                                                                                                                                                                                                                                                                                                                                                                                                                                                                                                                                                                                                                                                                                                                                                                                                                                                                                                                                                                                                                                                                                                                                                                                                                                                                                                                                                                                                                                                                                                                                                                                                                                                                                                                                                                                                                                                                                                                                                                                                                                                                                                                                                                                                                                                                                                                                                                                                                                                     | 0.48   | 0.94    | 0.09    | 0.83             | 2.64           | 0.09                                | 2.63                            | 4.54                       | 2.21                        | 11.49              | 3.73    | 3.42        | 7.65              | 4.65                                                              | 5.73               | 5.06    | 2.46    | 4.98    | 2.15    | 5.06    | 10.43   | 3.29                  | 7.42              | 3.24    | 4.77    |         |         |         |         |         |         |         |         |         |         |         |                       |         |         |         |                         |      |      |      |      |      |      |      |      |      |       |      |      |      |      |      |      |      |      |      |      |       |      |      |      |      |                       |      |      |      |      |       |      |       |       |       |        |       |       |       |       |       |       |       |       |       |       |       |       |       |       |       |       |      |      |      |      |       |      |      |      |      |      |      |      |      |      |      |      |      |      |      |      |      |      |      |      |      |          |    |    |   |    |  |     |        |    |    |    |    |         |    |     |      |    |      |    |        |    |        |    |                   |    |    |    |           |     |     |     |      |  |      |     |     |     |     |     |      |     |      |      |     |     |     |      |      |      |      |     |      |     |
| Rel. Inten. (% of BP)                                                                                                                                                                                                                                                                                                                                                                                                                                                                                                                                                                                                                                                                                                                                                                                                                                                                                                                                                                                                                                                                                                                                                                                                                                                                                                                                                                                                                                                                                                                                                                                                                                                                                                                                                                                                                                                                                                                                                                                                                                                                                                                                                                                                                                                                                                                                                                                                                                                                                                                                       | 4.19   | 8.16    | 0.81    | 7.26             | 22.99          | 0.74                                | 22.90                           | 39.52                      | 19.25                       | 100.00             | 32.44   | 29.74       | 66.62             | 40.52                                                             | 49.91              | 44.08   | 21.46   | 43.36   | 18.72   | 44.08   | 90.83   | 28.66                 | 64.56             | 28.22   | 41.56   |         |         |         |         |         |         |         |         |         |         |         |                       |         |         |         |                         |      |      |      |      |      |      |      |      |      |       |      |      |      |      |      |      |      |      |      |      |       |      |      |      |      |                       |      |      |      |      |       |      |       |       |       |        |       |       |       |       |       |       |       |       |       |       |       |       |       |       |       |       |      |      |      |      |       |      |      |      |      |      |      |      |      |      |      |      |      |      |      |      |      |      |      |      |      |          |    |    |   |    |  |     |        |    |    |    |    |         |    |     |      |    |      |    |        |    |        |    |                   |    |    |    |           |     |     |     |      |  |      |     |     |     |     |     |      |     |      |      |     |     |     |      |      |      |      |     |      |     |
| Score                                                                                                                                                                                                                                                                                                                                                                                                                                                                                                                                                                                                                                                                                                                                                                                                                                                                                                                                                                                                                                                                                                                                                                                                                                                                                                                                                                                                                                                                                                                                                                                                                                                                                                                                                                                                                                                                                                                                                                                                                                                                                                                                                                                                                                                                                                                                                                                                                                                                                                                                                       | 0.50   | 0.22    | 1.00    | 1.00             | -0.23          | 0.20                                | 0.50                            | 1.50                       | 0.75                        | 0.50               | 0.50    | 0.50        | 1.50              | 0.75                                                              | 0.75               | 1.50    | 0.75    | 1.50    | 0.75    | 1.50    | 1.50    | 1.50                  | 1.50              | 0.50    | 1.50    |         |         |         |         |         |         |         |         |         |         |         |                       |         |         |         |                         |      |      |      |      |      |      |      |      |      |       |      |      |      |      |      |      |      |      |      |      |       |      |      |      |      |                       |      |      |      |      |       |      |       |       |       |        |       |       |       |       |       |       |       |       |       |       |       |       |       |       |       |       |      |      |      |      |       |      |      |      |      |      |      |      |      |      |      |      |      |      |      |      |      |      |      |      |      |          |    |    |   |    |  |     |        |    |    |    |    |         |    |     |      |    |      |    |        |    |        |    |                   |    |    |    |           |     |     |     |      |  |      |     |     |     |     |     |      |     |      |      |     |     |     |      |      |      |      |     |      |     |
| Ion-type                                                                                                                                                                                                                                                                                                                                                                                                                                                                                                                                                                                                                                                                                                                                                                                                                                                                                                                                                                                                                                                                                                                                                                                                                                                                                                                                                                                                                                                                                                                                                                                                                                                                                                                                                                                                                                                                                                                                                                                                                                                                                                                                                                                                                                                                                                                                                                                                                                                                                                                                                    | KQ     | LI      | E       | a1               |                | RKQ                                 | y1-NH3                          | y1                         | LN                          | a2                 | b2      | ELN+H2O     | y3                | ELN                                                               | ALEL               | y4      | DkAL    | y5      | b5-H2O  | y5      | y6-H2O  | y6                    | y12 <sup>+2</sup> | y7      | b7      | y8      |         |         |         |         |         |         |         |         |         |         |                       |         |         |         |                         |      |      |      |      |      |      |      |      |      |       |      |      |      |      |      |      |      |      |      |      |       |      |      |      |      |                       |      |      |      |      |       |      |       |       |       |        |       |       |       |       |       |       |       |       |       |       |       |       |       |       |       |       |      |      |      |      |       |      |      |      |      |      |      |      |      |      |      |      |      |      |      |      |      |      |      |      |      |          |    |    |   |    |  |     |        |    |    |    |    |         |    |     |      |    |      |    |        |    |        |    |                   |    |    |    |           |     |     |     |      |  |      |     |     |     |     |     |      |     |      |      |     |     |     |      |      |      |      |     |      |     |
| Delta ppm                                                                                                                                                                                                                                                                                                                                                                                                                                                                                                                                                                                                                                                                                                                                                                                                                                                                                                                                                                                                                                                                                                                                                                                                                                                                                                                                                                                                                                                                                                                                                                                                                                                                                                                                                                                                                                                                                                                                                                                                                                                                                                                                                                                                                                                                                                                                                                                                                                                                                                                                                   | 3.9    | 0.9     | 0.4     | -9.8             |                | -1.1                                | 7.3                             | 2.0                        | 0.6                         | 1.1                | 6.7     | 14.8        | 9.2               | 10.8                                                              | 11.7               | 8.8     | 5.9     | 9.4     | -7.8    | 10.6    | 12.5    | 13.5                  | 7.4               | 14.6    | 9.4     |         |         |         |         |         |         |         |         |         |         |         |                       |         |         |         |                         |      |      |      |      |      |      |      |      |      |       |      |      |      |      |      |      |      |      |      |      |       |      |      |      |      |                       |      |      |      |      |       |      |       |       |       |        |       |       |       |       |       |       |       |       |       |       |       |       |       |       |       |       |      |      |      |      |       |      |      |      |      |      |      |      |      |      |      |      |      |      |      |      |      |      |      |      |      |          |    |    |   |    |  |     |        |    |    |    |    |         |    |     |      |    |      |    |        |    |        |    |                   |    |    |    |           |     |     |     |      |  |      |     |     |     |     |     |      |     |      |      |     |     |     |      |      |      |      |     |      |     |

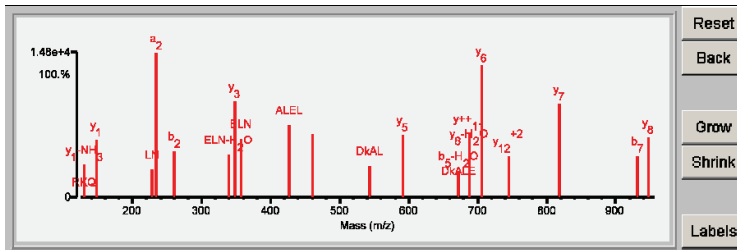

Result Summary

| Rank | Score | SPI (%) | BCS | # Unmatched ions | Variable sites | Sequence              | MH <sup>+</sup> Calculated (Da) | MH <sup>+</sup> Error (Da) | MH <sup>+</sup> Error (ppm) | Protein MW/pI (Da) | Species | Accession # | Protein Name                                                      |
|------|-------|---------|-----|------------------|----------------|-----------------------|---------------------------------|----------------------------|-----------------------------|--------------------|---------|-------------|-------------------------------------------------------------------|
| 1    | 19.26 | 88.5    | 11  | 2/25             | K51k           | (R)SSDFAKINNTENLVR(E) | 1820.9501                       | 114.0540                   | 5.7                         | 40422.9/7.56       | HUMAN   | Q9Y617      | Phosphoserine aminotransferase OS=Homo sapiens GN=PSAT1 PE=1 SV=2 |

Detailed Results

| Rank | Score | SPI (%) | BCS | # Unmatched ions | Variable sites | Sequence                              | MH <sup>+</sup> Calculated (Da) | MH <sup>+</sup> Error (Da) | MH <sup>+</sup> Error (ppm) | Protein MW/pI (Da) | Species | Accession # | MS-Digest Index # | Protein Name                                                      |
|------|-------|---------|-----|------------------|----------------|---------------------------------------|---------------------------------|----------------------------|-----------------------------|--------------------|---------|-------------|-------------------|-------------------------------------------------------------------|
| 1    | 19.26 | 88.5    | 11  | 2/25             | K51k           | (R)S/S/D/F/A/K/I/I/N/N/T/E/N/L/V/R(E) | 1820.9501                       | 114.0540                   | 5.7                         | 40422.9/7.56       | HUMAN   | Q9Y617      | 716561            | Phosphoserine aminotransferase OS=Homo sapiens GN=PSAT1 PE=1 SV=2 |

| Fragment-ion (m/z)      | 60.044 | 70.064 | 84.044 | 84.082 | 86.094 | 87.054 | 102.054 | 120.082 | 147.075 | 175.067 | 175.116 | 272.085 | 290.098 | 356.226 | 366.213 <sup>+2</sup> | 437.171 | 462.741 <sup>+2</sup> | 501.314 | 630.359 | 689.351 | 731.402 | 845.447 | 872.443 | 959.485 | 1072.563 |
|-------------------------|--------|--------|--------|--------|--------|--------|---------|---------|---------|---------|---------|---------|---------|---------|-----------------------|---------|-----------------------|---------|---------|---------|---------|---------|---------|---------|----------|
| Frac. Inten. (% of TIC) | 4.82   | 0.00   | 0.08   | 7.29   | 0.60   | 0.10   | 0.08    | 0.31    | 4.64    | 4.68    | 7.89    | 4.56    | 6.11    | 3.17    | 3.28                  | 3.15    | 3.73                  | 4.00    | 6.57    | 2.77    | 9.18    | 6.14    | 4.16    | 8.63    | 4.04     |
| Rel. Inten. (% of BP)   | 52.53  | 0.03   | 0.93   | 79.38  | 6.50   | 1.06   | 0.91    | 3.36    | 50.54   | 50.92   | 85.94   | 49.69   | 66.50   | 34.55   | 35.75                 | 34.29   | 40.58                 | 43.53   | 71.56   | 30.19   | 100.00  | 66.89   | 45.34   | 94.03   | 44.05    |
| Score                   | 0.50   | 0.20   | 1.00   | -0.79  | 0.22   | 0.33   |         | 1.00    | 0.50    | 0.50    | 1.50    | 0.25    | 0.50    | 0.75    | 1.50                  | 0.50    | 1.50                  | 1.50    | 0.75    | 1.50    | 0.75    | 1.50    | 1.50    | 1.50    | 1.50     |
| Ion-type                | a1     | PR     | E      |        | LI     | NR     | E       | F       | a2      | b2      | y1      | b3+H2O  | b3      | kl      | y6 <sup>+2</sup>      | b4      | y++15 <sup>+2</sup>   | y4      | y5      | DFAKI   | y6      | b7+H2O  | y8      | b9+H2O  | y9       |
| Delta ppm               | -16.4  | -20.3  | -5.8   |        | -24.7  | -16.0  |         | 6.0     | -19.1   | -31.0   | -15.1   | -14.4   | -6.5    | -11.0   | 19.5                  | 8.5     | -9.8                  |         | 3.9     | -16.5   | -3.7    | 36.4    |         | -5.7    | 18.2     |
|                         |        |        |        |        |        |        |         |         |         |         |         |         |         |         |                       |         |                       |         |         |         |         |         |         |         |          |

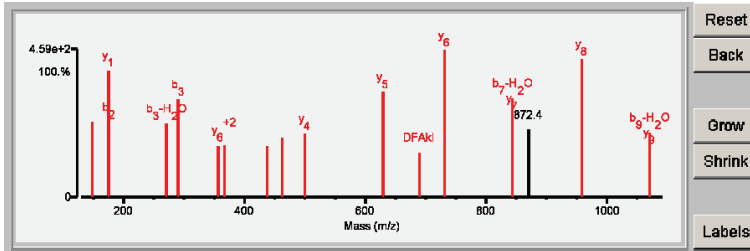

Result Summary

| Rank | Score | SPI (%) | BCS | # Unmatched ions | Variable sites | Sequence                   | MH <sup>+</sup> Calculated (Da) | MH <sup>+</sup> Error (Da) | MH <sup>+</sup> Error (ppm) | Protein MW/pI (Da) | Species | Accession # | Protein Name                                                                                     |
|------|-------|---------|-----|------------------|----------------|----------------------------|---------------------------------|----------------------------|-----------------------------|--------------------|---------|-------------|--------------------------------------------------------------------------------------------------|
| 1    | 11.16 | 62.4    | 8   | 9/24             | K207k          | (K)ICKPLHELIMQLLEETPEEK(Q) | 2450.2669                       | 114.0420                   | -0.4                        | 25569.4/5.57       | HUMAN   | P68402      | Platelet-activating factor acetylhydrolase IB subunit beta OS=Homo sapiens GN=PFAFH1B2 PE=1 SV=1 |

Detailed Results

| Rank | Score | SPI (%)                 | BCS    | # Unmatched ions | Variable sites | Sequence                                        | MH <sup>+</sup> Calculated (Da) | MH <sup>+</sup> Error (Da) | MH <sup>+</sup> Error (ppm) | Protein MW/pI (Da) | Species | Accession # | MS-Digest Index # | Protein Name                                                                                     |         |         |         |         |                       |         |                       |                       |                       |                   |                       |         |
|------|-------|-------------------------|--------|------------------|----------------|-------------------------------------------------|---------------------------------|----------------------------|-----------------------------|--------------------|---------|-------------|-------------------|--------------------------------------------------------------------------------------------------|---------|---------|---------|---------|-----------------------|---------|-----------------------|-----------------------|-----------------------|-------------------|-----------------------|---------|
| 1    | 11.16 | 62.4                    | 8      | 9/24             | K207k          | (K) I C K P L H E L I M Q L L E E T P E E K (Q) | 2450.2669                       | 114.0420                   | -0.4                        | 25569.4/5.57       | HUMAN   | P68402      | 476703            | Platelet-activating factor acetylhydrolase IB subunit beta OS=Homo sapiens GN=PFAFH1B2 PE=1 SV=1 |         |         |         |         |                       |         |                       |                       |                       |                   |                       |         |
|      |       | Fragment-ion (m/z)      | 70.065 | 72.080           | 84.043         | 86.096                                          | 87.100                          | 101.072                    | 102.054                     | 110.070            | 120.079 | 129.101     | 136.073           | 215.137                                                                                          | 253.134 | 276.159 | 333.168 | 502.249 | 553.298 <sup>+2</sup> | 603.300 | 609.841 <sup>+2</sup> | 618.356 <sup>+2</sup> | 675.859 <sup>+2</sup> | 732.338           | 739.375 <sup>+2</sup> | 861.397 |
|      |       | Frac. Inten. (% of TIC) | 0.01   | 6.17             | 0.14           | 30.22                                           | 4.99                            | 0.11                       | 0.07                        | 0.18               | 4.65    | 0.09        | 4.15              | 2.45                                                                                             | 2.45    | 2.55    | 6.78    | 2.88    | 2.55                  | 2.30    | 4.65                  | 2.34                  | 3.63                  | 4.07              | 7.18                  | 5.41    |
|      |       | Rel. Inten. (% of BP)   | 0.02   | 20.41            | 0.45           | 100.00                                          | 16.52                           | 0.38                       | 0.23                        | 0.59               | 15.38   | 0.30        | 13.73             | 8.10                                                                                             | 8.12    | 8.45    | 22.43   | 9.53    | 8.43                  | 7.61    | 15.38                 | 7.74                  | 12.00                 | 13.46             | 23.76                 | 17.90   |
|      |       | Score                   | 0.20   | -0.20            | 1.00           | 0.50                                            | -0.17                           | 0.50                       | 0.50                        | 1.00               | -0.15   | 0.20        | -0.14             | -0.08                                                                                            | -0.08   | 1.50    | -0.22   | 1.50    | 0.50                  | 1.50    | 0.50                  | -0.08                 | -0.12                 | 1.50              | 0.50                  | 1.50    |
|      |       | Ion-type                | PR     |                  | E              | a1                                              | QK                              | E                          | H                           | RKQ                |         |             |                   |                                                                                                  |         | y2      |         | y4      | b6 <sup>+2</sup>      | y5      | b3 <sup>+2</sup>      |                       | y6                    | b11 <sup>+2</sup> | y7                    |         |
|      |       | Delta ppm               | -6.1   |                  | -13.0          | -18.9                                           | 0.50                            | LI                         | -6.1                        |                    |         |             |                   |                                                                                                  |         | 13.0    |         | -2.7    | 4.1                   | 2.4     | 6.0                   |                       | -4.4                  | -16.0             | 15.1                  |         |

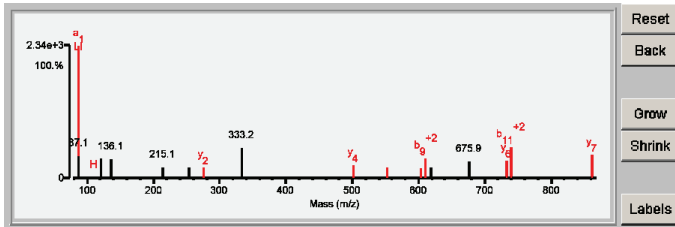

Reset

Back

Grow

Shrink

Labels

Result Summary

| Rank | Score | SPI (%) | BCS | # Unmatched Ions | Variable sites | Sequence          | MH <sup>+</sup> Calculated (Da) | MH <sup>+</sup> Error (Da) | MH <sup>+</sup> Error (ppm) | Protein MW/pl (Da) | Species | Accession # | Protein Name                                                      |
|------|-------|---------|-----|------------------|----------------|-------------------|---------------------------------|----------------------------|-----------------------------|--------------------|---------|-------------|-------------------------------------------------------------------|
| 1    | 13.81 | 55.3    | 6   | 8/25             | K165k          | (R)WYHPGCFVKNR(E) | 1463.7001                       | 114.0508                   | 5.0                         | 113084.4/8.99      | HUMAN   | P09874      | Poly [ADP-ribose] polymerase 1 OS=Homo sapiens GN=PARP1 PE=1 SV=4 |

Detailed Results

| Rank                    | Score  | SPI (%) | BCS    | # Unmatched Ions | Variable sites | Sequence            | MH <sup>+</sup> Calculated (Da) | MH <sup>+</sup> Error (Da) | MH <sup>+</sup> Error (ppm) | Protein MW/pl (Da) | Species | Accession # | MS-Digest Index # | Protein Name                                                      |         |         |         |         |         |         |         |         |         |         |         |
|-------------------------|--------|---------|--------|------------------|----------------|---------------------|---------------------------------|----------------------------|-----------------------------|--------------------|---------|-------------|-------------------|-------------------------------------------------------------------|---------|---------|---------|---------|---------|---------|---------|---------|---------|---------|---------|
| 1                       | 13.81  | 55.3    | 6      | 8/25             | K165k          | (R)WYHPIPGCFVKNR(E) | 1463.7001                       | 114.0508                   | 5.0                         | 113084.4/8.99      | HUMAN   | P09874      | 482543            | Poly [ADP-ribose] polymerase 1 OS=Homo sapiens GN=PARP1 PE=1 SV=4 |         |         |         |         |         |         |         |         |         |         |         |
| Fragment-ion (m/z)      | 70.065 | 72.081  | 84.081 | 86.096           | 87.054         | 110.073             | 120.078                         | 129.105                    | 132.081                     | 136.076            | 159.091 | 170.059     | 175.113           | 250.095                                                           | 289.163 | 301.128 | 313.178 | 321.136 | 339.212 | 462.193 | 474.276 | 487.204 | 531.299 | 546.260 | 630.367 |
| Frac. Inten. (% of TIC) | 0.01   | 0.47    | 9.41   | 4.60             | 0.09           | 0.44                | 0.47                            | 0.14                       | 5.81                        | 0.15               | 0.19    | 7.09        | 5.01              | 3.17                                                              | 6.01    | 5.18    | 6.23    | 4.29    | 3.76    | 3.57    | 4.62    | 5.32    | 15.28   | 4.64    | 4.07    |
| Rel. Inten. (% of BP)   | 0.07   | 3.09    | 61.56  | 30.12            | 0.58           | 2.89                | 3.07                            | 0.92                       | 38.01                       | 0.96               | 1.25    | 46.39       | 32.81             | 20.72                                                             | 39.34   | 33.89   | 40.77   | 28.09   | 24.62   | 23.35   | 30.24   | 34.80   | 100.00  | 30.34   | 26.63   |
| Score                   | 0.20   | 0.50    | -0.62  | -0.30            | 0.33           | 1.00                | 1.00                            | 0.20                       | -0.38                       | 1.00               | 2.00    | -0.46       | 1.50              | -0.21                                                             | 1.50    | 0.75    | -0.41   | 0.50    | -0.25   | 0.75    | -0.30   | 0.50    | 1.50    | 1.50    | 1.50    |
| Ion-type                | PR     | V       |        |                  | NR             | H                   | F                               | RKQ                        |                             | Y                  | a1      |             | y1                |                                                                   | y2      | YH      |         | b+++    |         | PGCF    |         | b3      | y3      | y++8    | y4      |
| Delta ppm               | -0.4   | -1.0    |        |                  | -12.5          | 13.0                | -23.9                           | 18.3                       |                             | 0.1                | -10.5   |             | -35.7             |                                                                   | 2.8     | -7.7    |         | -30.6   |         | 24.7    |         | -13.2   | -2.2    | -26.1   | -1.4    |

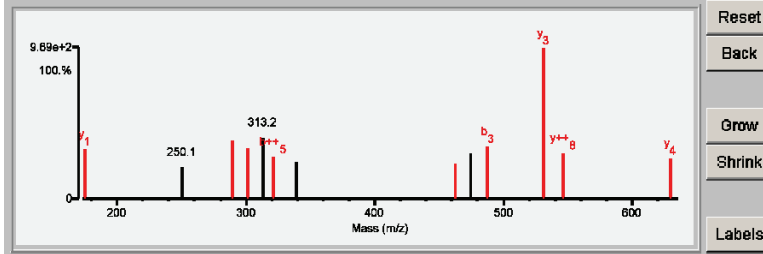

Result Summary

| Rank | Score | SPI (%) | BCS | # Unmatched Ions | Variable sites    | Sequence                    | MH <sup>+</sup> Calculated (Da) | MH <sup>+</sup> Error (Da) | MH <sup>+</sup> Error (ppm) | Protein MW/pI (Da) | Species | Accession # | Protein Name                                                                                   |
|------|-------|---------|-----|------------------|-------------------|-----------------------------|---------------------------------|----------------------------|-----------------------------|--------------------|---------|-------------|------------------------------------------------------------------------------------------------|
| 1    | 21.65 | 93.4    | 9   | 2/25             | K269k             | (K)ELLIFNkQQVPSGESALDR(V)   | 2257.2187                       | 114.0494                   | 2.7                         | 113084.4/8.99      | HUMAN   | P09874      | Poly [ADP-ribose] polymerase 1 OS=Homo sapiens GN=PARP1 PE=1 SV=4                              |
| 2    | 9.20  | 66.0    | 4   | 12/25            | K1201k            | (R)ILEAEKQSKQLAELEQQR(T)    | 2257.2147                       | 114.0534                   | 4.4                         | 237348.2/5.85      | HUMAN   | RQ9HD67     | REVERSE Myosin-X OS=Homo sapiens GN=MYO10 PE=1 SV=3                                            |
| 3    | 8.90  | 63.9    | 3   | 13/25            | K539k K544k       | (K)AVICPTDEDLDRTIKR(T)      | 2143.1540                       | 228.1141                   | 11.9                        | 95739.0/6.49       | HUMAN   | Q9BUJ2      | Heterogeneous nuclear ribonucleoprotein U-like protein 1 OS=Homo sapiens GN=HNRNPUL1 PE=1 SV=2 |
| 4    | 8.67  | 52.5    | 3   | 14/25            | K82k              | (R)GAYGVVEKMRHVPSGQIMAVK(R) | 2257.1944                       | 114.0737                   | 13.0                        | 37492.6/7.01       | HUMAN   | P52564      | Dual specificity mitogen-activated protein kinase kinase 6 OS=Homo sapiens GN=MAP2K6 PE=1 SV=1 |
| 5    | 7.48  | 73.6    | 2   | 12/25            | M108m K105k K107k | (K)LLLEVLSGEMLPKTKgkmR(I)   | 2127.2028                       | 244.0652                   | -6.6                        | 246469.3/5.15      | HUMAN   | P11277      | Spectrin beta chain, erythrocyte OS=Homo sapiens GN=SPTB PE=1 SV=5                             |

Detailed Results

| Rank                                                                                                                                                                                                                                                                                                                                                                                                                                                                                                                                                                                                                                                                                                                                                                                                                                                                                                                                                                                                                                                                                                                                                                                                                                                                                                                                                                                                                                                                                                                                                                                                                                                                                                                                                                                                                                                                                                                                                                                                                                                                                                                                                                                                                                                                                                                                                                                                                                                                                                                                     | Score  | SPI (%) | BCS    | # Unmatched Ions | Variable sites | Sequence                                       | MH <sup>+</sup> Calculated (Da) | MH <sup>+</sup> Error (Da) | MH <sup>+</sup> Error (ppm) | Protein MW/pI (Da) | Species | Accession # | MS-Digest Index # | Protein Name                                                      |                    |         |         |         |         |           |         |           |            |          |          |         |           |           |         |           |         |         |         |         |           |         |           |            |          |          |                         |      |      |      |      |      |      |      |      |      |      |      |       |      |      |      |      |      |      |      |      |      |      |      |       |      |                       |      |      |      |      |      |      |       |       |       |       |      |       |      |       |      |      |      |      |       |      |       |       |      |        |      |       |      |      |      |      |      |      |      |      |      |      |       |      |      |      |      |      |      |      |       |      |      |      |      |      |      |          |    |   |   |    |    |    |    |    |    |        |    |     |       |      |    |    |       |        |  |       |    |       |       |     |     |           |     |       |       |       |       |       |       |       |      |      |  |      |      |  |     |     |     |      |       |     |     |      |     |      |       |
|------------------------------------------------------------------------------------------------------------------------------------------------------------------------------------------------------------------------------------------------------------------------------------------------------------------------------------------------------------------------------------------------------------------------------------------------------------------------------------------------------------------------------------------------------------------------------------------------------------------------------------------------------------------------------------------------------------------------------------------------------------------------------------------------------------------------------------------------------------------------------------------------------------------------------------------------------------------------------------------------------------------------------------------------------------------------------------------------------------------------------------------------------------------------------------------------------------------------------------------------------------------------------------------------------------------------------------------------------------------------------------------------------------------------------------------------------------------------------------------------------------------------------------------------------------------------------------------------------------------------------------------------------------------------------------------------------------------------------------------------------------------------------------------------------------------------------------------------------------------------------------------------------------------------------------------------------------------------------------------------------------------------------------------------------------------------------------------------------------------------------------------------------------------------------------------------------------------------------------------------------------------------------------------------------------------------------------------------------------------------------------------------------------------------------------------------------------------------------------------------------------------------------------------|--------|---------|--------|------------------|----------------|------------------------------------------------|---------------------------------|----------------------------|-----------------------------|--------------------|---------|-------------|-------------------|-------------------------------------------------------------------|--------------------|---------|---------|---------|---------|-----------|---------|-----------|------------|----------|----------|---------|-----------|-----------|---------|-----------|---------|---------|---------|---------|-----------|---------|-----------|------------|----------|----------|-------------------------|------|------|------|------|------|------|------|------|------|------|------|-------|------|------|------|------|------|------|------|------|------|------|------|-------|------|-----------------------|------|------|------|------|------|------|-------|-------|-------|-------|------|-------|------|-------|------|------|------|------|-------|------|-------|-------|------|--------|------|-------|------|------|------|------|------|------|------|------|------|------|-------|------|------|------|------|------|------|------|-------|------|------|------|------|------|------|----------|----|---|---|----|----|----|----|----|----|--------|----|-----|-------|------|----|----|-------|--------|--|-------|----|-------|-------|-----|-----|-----------|-----|-------|-------|-------|-------|-------|-------|-------|------|------|--|------|------|--|-----|-----|-----|------|-------|-----|-----|------|-----|------|-------|
| 1                                                                                                                                                                                                                                                                                                                                                                                                                                                                                                                                                                                                                                                                                                                                                                                                                                                                                                                                                                                                                                                                                                                                                                                                                                                                                                                                                                                                                                                                                                                                                                                                                                                                                                                                                                                                                                                                                                                                                                                                                                                                                                                                                                                                                                                                                                                                                                                                                                                                                                                                        | 21.65  | 93.4    | 9      | 2/25             | K269k          | (K)E L L I F N k Q Q V P S G E S A I L D R (V) | 2257.2187                       | 114.0494                   | 2.7                         | 113084.4/8.99      | HUMAN   | P09874      | 482543            | Poly [ADP-ribose] polymerase 1 OS=Homo sapiens GN=PARP1 PE=1 SV=4 |                    |         |         |         |         |           |         |           |            |          |          |         |           |           |         |           |         |         |         |         |           |         |           |            |          |          |                         |      |      |      |      |      |      |      |      |      |      |      |       |      |      |      |      |      |      |      |      |      |      |      |       |      |                       |      |      |      |      |      |      |       |       |       |       |      |       |      |       |      |      |      |      |       |      |       |       |      |        |      |       |      |      |      |      |      |      |      |      |      |      |       |      |      |      |      |      |      |      |       |      |      |      |      |      |      |          |    |   |   |    |    |    |    |    |    |        |    |     |       |      |    |    |       |        |  |       |    |       |       |     |     |           |     |       |       |       |       |       |       |       |      |      |  |      |      |  |     |     |     |      |       |     |     |      |     |      |       |
| <table border="1"> <thead> <tr> <th>Fragment-ion (m/z)</th> <th>70.065</th> <th>72.080</th> <th>84.042</th> <th>86.095</th> <th>175.116</th> <th>197.127</th> <th>215.137</th> <th>243.131</th> <th>338.205</th> <th>356.217</th> <th>503.279</th> <th>522.767*2</th> <th>572.310*2</th> <th>598.333</th> <th>614.839*2</th> <th>674.387</th> <th>712.374</th> <th>842.412</th> <th>859.429</th> <th>878.459*2</th> <th>947.481</th> <th>951.985*2</th> <th>1008.535*2</th> <th>1044.528</th> <th>1143.584</th> </tr> </thead> <tbody> <tr> <td>Frac. Inten. (% of TIC)</td> <td>0.00</td> <td>0.07</td> <td>0.05</td> <td>0.31</td> <td>2.36</td> <td>1.62</td> <td>4.91</td> <td>6.71</td> <td>2.62</td> <td>6.60</td> <td>1.56</td> <td>17.46</td> <td>1.88</td> <td>3.24</td> <td>1.92</td> <td>1.88</td> <td>2.01</td> <td>1.74</td> <td>5.00</td> <td>1.81</td> <td>3.86</td> <td>4.83</td> <td>2.25</td> <td>23.74</td> <td>1.57</td> </tr> <tr> <td>Rel. Inten. (% of BP)</td> <td>0.01</td> <td>0.31</td> <td>0.20</td> <td>1.31</td> <td>9.94</td> <td>6.81</td> <td>20.70</td> <td>28.27</td> <td>11.02</td> <td>27.79</td> <td>6.58</td> <td>73.56</td> <td>7.91</td> <td>13.66</td> <td>8.11</td> <td>7.92</td> <td>8.45</td> <td>7.35</td> <td>21.07</td> <td>7.94</td> <td>16.24</td> <td>20.33</td> <td>9.46</td> <td>100.00</td> <td>6.63</td> </tr> <tr> <td>Score</td> <td>0.20</td> <td>0.50</td> <td>1.00</td> <td>0.22</td> <td>1.50</td> <td>0.75</td> <td>0.50</td> <td>0.25</td> <td>0.50</td> <td>0.50</td> <td>-0.07</td> <td>1.50</td> <td>1.50</td> <td>0.75</td> <td>0.50</td> <td>1.50</td> <td>0.75</td> <td>0.50</td> <td>-0.21</td> <td>1.50</td> <td>1.50</td> <td>1.50</td> <td>1.50</td> <td>1.50</td> <td>1.50</td> </tr> <tr> <td>Ion-type</td> <td>PR</td> <td>V</td> <td>E</td> <td>LI</td> <td>y1</td> <td>VP</td> <td>a2</td> <td>b2</td> <td>b3</td> <td>b3-H2O</td> <td>b3</td> <td>y10</td> <td>y11*2</td> <td>kQQV</td> <td>b3</td> <td>y6</td> <td>NkQQV</td> <td>y6-H2O</td> <td></td> <td>y15*2</td> <td>y9</td> <td>y16*2</td> <td>y17*2</td> <td>y10</td> <td>y11</td> </tr> <tr> <td>Delta ppm</td> <td>3.9</td> <td>-13.5</td> <td>-26.1</td> <td>-18.9</td> <td>-15.7</td> <td>-13.5</td> <td>-13.6</td> <td>-18.2</td> <td>-9.8</td> <td>-5.9</td> <td></td> <td>-5.3</td> <td>10.6</td> <td></td> <td>2.5</td> <td>1.4</td> <td>5.2</td> <td>-1.1</td> <td>-29.6</td> <td>6.9</td> <td>1.3</td> <td>-2.2</td> <td>5.7</td> <td>-3.9</td> <td>-14.1</td> </tr> </tbody> </table> |        |         |        |                  |                |                                                |                                 |                            |                             |                    |         |             |                   |                                                                   | Fragment-ion (m/z) | 70.065  | 72.080  | 84.042  | 86.095  | 175.116   | 197.127 | 215.137   | 243.131    | 338.205  | 356.217  | 503.279 | 522.767*2 | 572.310*2 | 598.333 | 614.839*2 | 674.387 | 712.374 | 842.412 | 859.429 | 878.459*2 | 947.481 | 951.985*2 | 1008.535*2 | 1044.528 | 1143.584 | Frac. Inten. (% of TIC) | 0.00 | 0.07 | 0.05 | 0.31 | 2.36 | 1.62 | 4.91 | 6.71 | 2.62 | 6.60 | 1.56 | 17.46 | 1.88 | 3.24 | 1.92 | 1.88 | 2.01 | 1.74 | 5.00 | 1.81 | 3.86 | 4.83 | 2.25 | 23.74 | 1.57 | Rel. Inten. (% of BP) | 0.01 | 0.31 | 0.20 | 1.31 | 9.94 | 6.81 | 20.70 | 28.27 | 11.02 | 27.79 | 6.58 | 73.56 | 7.91 | 13.66 | 8.11 | 7.92 | 8.45 | 7.35 | 21.07 | 7.94 | 16.24 | 20.33 | 9.46 | 100.00 | 6.63 | Score | 0.20 | 0.50 | 1.00 | 0.22 | 1.50 | 0.75 | 0.50 | 0.25 | 0.50 | 0.50 | -0.07 | 1.50 | 1.50 | 0.75 | 0.50 | 1.50 | 0.75 | 0.50 | -0.21 | 1.50 | 1.50 | 1.50 | 1.50 | 1.50 | 1.50 | Ion-type | PR | V | E | LI | y1 | VP | a2 | b2 | b3 | b3-H2O | b3 | y10 | y11*2 | kQQV | b3 | y6 | NkQQV | y6-H2O |  | y15*2 | y9 | y16*2 | y17*2 | y10 | y11 | Delta ppm | 3.9 | -13.5 | -26.1 | -18.9 | -15.7 | -13.5 | -13.6 | -18.2 | -9.8 | -5.9 |  | -5.3 | 10.6 |  | 2.5 | 1.4 | 5.2 | -1.1 | -29.6 | 6.9 | 1.3 | -2.2 | 5.7 | -3.9 | -14.1 |
| Fragment-ion (m/z)                                                                                                                                                                                                                                                                                                                                                                                                                                                                                                                                                                                                                                                                                                                                                                                                                                                                                                                                                                                                                                                                                                                                                                                                                                                                                                                                                                                                                                                                                                                                                                                                                                                                                                                                                                                                                                                                                                                                                                                                                                                                                                                                                                                                                                                                                                                                                                                                                                                                                                                       | 70.065 | 72.080  | 84.042 | 86.095           | 175.116        | 197.127                                        | 215.137                         | 243.131                    | 338.205                     | 356.217            | 503.279 | 522.767*2   | 572.310*2         | 598.333                                                           | 614.839*2          | 674.387 | 712.374 | 842.412 | 859.429 | 878.459*2 | 947.481 | 951.985*2 | 1008.535*2 | 1044.528 | 1143.584 |         |           |           |         |           |         |         |         |         |           |         |           |            |          |          |                         |      |      |      |      |      |      |      |      |      |      |      |       |      |      |      |      |      |      |      |      |      |      |      |       |      |                       |      |      |      |      |      |      |       |       |       |       |      |       |      |       |      |      |      |      |       |      |       |       |      |        |      |       |      |      |      |      |      |      |      |      |      |      |       |      |      |      |      |      |      |      |       |      |      |      |      |      |      |          |    |   |   |    |    |    |    |    |    |        |    |     |       |      |    |    |       |        |  |       |    |       |       |     |     |           |     |       |       |       |       |       |       |       |      |      |  |      |      |  |     |     |     |      |       |     |     |      |     |      |       |
| Frac. Inten. (% of TIC)                                                                                                                                                                                                                                                                                                                                                                                                                                                                                                                                                                                                                                                                                                                                                                                                                                                                                                                                                                                                                                                                                                                                                                                                                                                                                                                                                                                                                                                                                                                                                                                                                                                                                                                                                                                                                                                                                                                                                                                                                                                                                                                                                                                                                                                                                                                                                                                                                                                                                                                  | 0.00   | 0.07    | 0.05   | 0.31             | 2.36           | 1.62                                           | 4.91                            | 6.71                       | 2.62                        | 6.60               | 1.56    | 17.46       | 1.88              | 3.24                                                              | 1.92               | 1.88    | 2.01    | 1.74    | 5.00    | 1.81      | 3.86    | 4.83      | 2.25       | 23.74    | 1.57     |         |           |           |         |           |         |         |         |         |           |         |           |            |          |          |                         |      |      |      |      |      |      |      |      |      |      |      |       |      |      |      |      |      |      |      |      |      |      |      |       |      |                       |      |      |      |      |      |      |       |       |       |       |      |       |      |       |      |      |      |      |       |      |       |       |      |        |      |       |      |      |      |      |      |      |      |      |      |      |       |      |      |      |      |      |      |      |       |      |      |      |      |      |      |          |    |   |   |    |    |    |    |    |    |        |    |     |       |      |    |    |       |        |  |       |    |       |       |     |     |           |     |       |       |       |       |       |       |       |      |      |  |      |      |  |     |     |     |      |       |     |     |      |     |      |       |
| Rel. Inten. (% of BP)                                                                                                                                                                                                                                                                                                                                                                                                                                                                                                                                                                                                                                                                                                                                                                                                                                                                                                                                                                                                                                                                                                                                                                                                                                                                                                                                                                                                                                                                                                                                                                                                                                                                                                                                                                                                                                                                                                                                                                                                                                                                                                                                                                                                                                                                                                                                                                                                                                                                                                                    | 0.01   | 0.31    | 0.20   | 1.31             | 9.94           | 6.81                                           | 20.70                           | 28.27                      | 11.02                       | 27.79              | 6.58    | 73.56       | 7.91              | 13.66                                                             | 8.11               | 7.92    | 8.45    | 7.35    | 21.07   | 7.94      | 16.24   | 20.33     | 9.46       | 100.00   | 6.63     |         |           |           |         |           |         |         |         |         |           |         |           |            |          |          |                         |      |      |      |      |      |      |      |      |      |      |      |       |      |      |      |      |      |      |      |      |      |      |      |       |      |                       |      |      |      |      |      |      |       |       |       |       |      |       |      |       |      |      |      |      |       |      |       |       |      |        |      |       |      |      |      |      |      |      |      |      |      |      |       |      |      |      |      |      |      |      |       |      |      |      |      |      |      |          |    |   |   |    |    |    |    |    |    |        |    |     |       |      |    |    |       |        |  |       |    |       |       |     |     |           |     |       |       |       |       |       |       |       |      |      |  |      |      |  |     |     |     |      |       |     |     |      |     |      |       |
| Score                                                                                                                                                                                                                                                                                                                                                                                                                                                                                                                                                                                                                                                                                                                                                                                                                                                                                                                                                                                                                                                                                                                                                                                                                                                                                                                                                                                                                                                                                                                                                                                                                                                                                                                                                                                                                                                                                                                                                                                                                                                                                                                                                                                                                                                                                                                                                                                                                                                                                                                                    | 0.20   | 0.50    | 1.00   | 0.22             | 1.50           | 0.75                                           | 0.50                            | 0.25                       | 0.50                        | 0.50               | -0.07   | 1.50        | 1.50              | 0.75                                                              | 0.50               | 1.50    | 0.75    | 0.50    | -0.21   | 1.50      | 1.50    | 1.50      | 1.50       | 1.50     | 1.50     |         |           |           |         |           |         |         |         |         |           |         |           |            |          |          |                         |      |      |      |      |      |      |      |      |      |      |      |       |      |      |      |      |      |      |      |      |      |      |      |       |      |                       |      |      |      |      |      |      |       |       |       |       |      |       |      |       |      |      |      |      |       |      |       |       |      |        |      |       |      |      |      |      |      |      |      |      |      |      |       |      |      |      |      |      |      |      |       |      |      |      |      |      |      |          |    |   |   |    |    |    |    |    |    |        |    |     |       |      |    |    |       |        |  |       |    |       |       |     |     |           |     |       |       |       |       |       |       |       |      |      |  |      |      |  |     |     |     |      |       |     |     |      |     |      |       |
| Ion-type                                                                                                                                                                                                                                                                                                                                                                                                                                                                                                                                                                                                                                                                                                                                                                                                                                                                                                                                                                                                                                                                                                                                                                                                                                                                                                                                                                                                                                                                                                                                                                                                                                                                                                                                                                                                                                                                                                                                                                                                                                                                                                                                                                                                                                                                                                                                                                                                                                                                                                                                 | PR     | V       | E      | LI               | y1             | VP                                             | a2                              | b2                         | b3                          | b3-H2O             | b3      | y10         | y11*2             | kQQV                                                              | b3                 | y6      | NkQQV   | y6-H2O  |         | y15*2     | y9      | y16*2     | y17*2      | y10      | y11      |         |           |           |         |           |         |         |         |         |           |         |           |            |          |          |                         |      |      |      |      |      |      |      |      |      |      |      |       |      |      |      |      |      |      |      |      |      |      |      |       |      |                       |      |      |      |      |      |      |       |       |       |       |      |       |      |       |      |      |      |      |       |      |       |       |      |        |      |       |      |      |      |      |      |      |      |      |      |      |       |      |      |      |      |      |      |      |       |      |      |      |      |      |      |          |    |   |   |    |    |    |    |    |    |        |    |     |       |      |    |    |       |        |  |       |    |       |       |     |     |           |     |       |       |       |       |       |       |       |      |      |  |      |      |  |     |     |     |      |       |     |     |      |     |      |       |
| Delta ppm                                                                                                                                                                                                                                                                                                                                                                                                                                                                                                                                                                                                                                                                                                                                                                                                                                                                                                                                                                                                                                                                                                                                                                                                                                                                                                                                                                                                                                                                                                                                                                                                                                                                                                                                                                                                                                                                                                                                                                                                                                                                                                                                                                                                                                                                                                                                                                                                                                                                                                                                | 3.9    | -13.5   | -26.1  | -18.9            | -15.7          | -13.5                                          | -13.6                           | -18.2                      | -9.8                        | -5.9               |         | -5.3        | 10.6              |                                                                   | 2.5                | 1.4     | 5.2     | -1.1    | -29.6   | 6.9       | 1.3     | -2.2      | 5.7        | -3.9     | -14.1    |         |           |           |         |           |         |         |         |         |           |         |           |            |          |          |                         |      |      |      |      |      |      |      |      |      |      |      |       |      |      |      |      |      |      |      |      |      |      |      |       |      |                       |      |      |      |      |      |      |       |       |       |       |      |       |      |       |      |      |      |      |       |      |       |       |      |        |      |       |      |      |      |      |      |      |      |      |      |      |       |      |      |      |      |      |      |      |       |      |      |      |      |      |      |          |    |   |   |    |    |    |    |    |    |        |    |     |       |      |    |    |       |        |  |       |    |       |       |     |     |           |     |       |       |       |       |       |       |       |      |      |  |      |      |  |     |     |     |      |       |     |     |      |     |      |       |

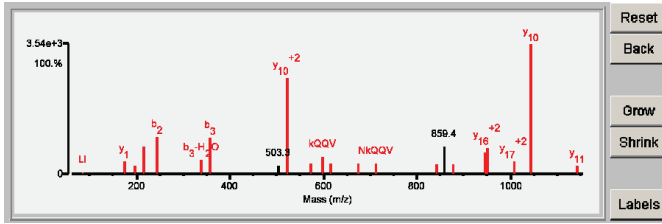

Result Summary

| Rank | Score | SPI (%) | BCS | # Unmatched Ions | Variable sites | Sequence                | MH <sup>+</sup> Calculated (Da) | MH <sup>+</sup> Error (Da) | MH <sup>+</sup> Error (ppm) | Protein MW (Da) | Species | Accession # | Protein Name                                                                                       |
|------|-------|---------|-----|------------------|----------------|-------------------------|---------------------------------|----------------------------|-----------------------------|-----------------|---------|-------------|----------------------------------------------------------------------------------------------------|
| 1    | 15.68 | 78.9    | 9   | 7/25             | K278k          | (K)ALNMAIPGGPKFEPLVR(D) | 1810.0044                       | 114.0546                   | 6.0                         | 273601.9/8.95   | HUMAN   | Q6P2Q9      | Pre-mRNA-processing-splicing factor 8 OS=Homo sapiens GN=PRPF8 PE=1 SV=2                           |
| 2    | 7.29  | 50.8    | 3   | 14/25            | K487k          | (K)EIKLEELAAAPNVK(R)(L) | 1810.0069                       | 114.0521                   | 4.7                         | 87978.3/7.75    | HUMAN   | RQ9BVJ6     | REVERSE U3 small nucleolar RNA-associated protein 14 homolog A OS=Homo sapiens GN=UTP14A PE=1 SV=1 |
| 3    | 5.12  | 58.1    | 1   | 15/25            | None           | (K)CALRQVNPQWRRLK(H)    | 1924.0810                       | -0.0221                    | -11.5                       | 138735.2/9.46   | HUMAN   | RQ9Z833     | REVERSE Protein Jumboji OS=Homo sapiens GN=JARID2 PE=2 SV=2                                        |
| 4    | 5.12  | 56.3    | 2   | 13/25            | K4033k K4034k  | (K)KEEPLPKKQLASAK(D)    | 1695.9640                       | 228.0950                   | 4.7                         | 566659.8/6.12   | HUMAN   | RQ9Y6V0     | REVERSE Protein piccolo OS=Homo sapiens GN=PCLO PE=1 SV=3                                          |
| 5    | 4.55  | 54.3    | 2   | 14/25            | K4033k K4041k  | (K)KEEPLPKKQLASAK(D)    | 1695.9640                       | 228.0950                   | 4.7                         | 566659.8/6.12   | HUMAN   | RQ9Y6V0     | REVERSE Protein piccolo OS=Homo sapiens GN=PCLO PE=1 SV=3                                          |

Detailed Results

| Rank                                                                                                                                                                                                                                                                                                                                                                                                                                                                                                                                                                                                                                                                                                                                                                                                                                                                                                                                                                                                                                                                                                                                                                                                                                                                                                                                                                                                                                                                                                                                                                                                                                                                                                                                                                                                                                                                                                                                                                                                                                                                                                                                                                                                                                                                                                                                                                                                                                                                                                          | Score  | SPI (%) | BCS    | # Unmatched Ions | Variable sites | Sequence                                 | MH <sup>+</sup> Calculated (Da) | MH <sup>+</sup> Error (Da) | MH <sup>+</sup> Error (ppm) | Protein MW (Da) | Species | Accession # | MS-Digest Index # | Protein Name                                                             |                    |         |         |         |                       |                       |         |         |         |         |          |         |         |         |         |         |         |         |         |                       |                       |         |         |         |         |          |                        |      |      |      |      |      |      |      |      |      |      |      |      |      |      |      |      |      |      |       |      |      |      |      |      |      |                      |      |      |       |      |      |      |      |      |       |       |       |      |       |      |       |      |      |      |        |       |      |      |      |      |       |       |      |      |       |      |       |      |      |       |      |      |      |      |      |      |      |       |       |      |      |      |      |      |       |      |      |          |    |   |    |    |   |     |    |    |    |    |     |    |     |  |  |  |  |  |                   |                   |    |       |  |  |     |           |      |       |  |       |  |       |      |  |       |      |    |  |  |       |      |  |  |  |     |     |      |      |  |  |      |
|---------------------------------------------------------------------------------------------------------------------------------------------------------------------------------------------------------------------------------------------------------------------------------------------------------------------------------------------------------------------------------------------------------------------------------------------------------------------------------------------------------------------------------------------------------------------------------------------------------------------------------------------------------------------------------------------------------------------------------------------------------------------------------------------------------------------------------------------------------------------------------------------------------------------------------------------------------------------------------------------------------------------------------------------------------------------------------------------------------------------------------------------------------------------------------------------------------------------------------------------------------------------------------------------------------------------------------------------------------------------------------------------------------------------------------------------------------------------------------------------------------------------------------------------------------------------------------------------------------------------------------------------------------------------------------------------------------------------------------------------------------------------------------------------------------------------------------------------------------------------------------------------------------------------------------------------------------------------------------------------------------------------------------------------------------------------------------------------------------------------------------------------------------------------------------------------------------------------------------------------------------------------------------------------------------------------------------------------------------------------------------------------------------------------------------------------------------------------------------------------------------------|--------|---------|--------|------------------|----------------|------------------------------------------|---------------------------------|----------------------------|-----------------------------|-----------------|---------|-------------|-------------------|--------------------------------------------------------------------------|--------------------|---------|---------|---------|-----------------------|-----------------------|---------|---------|---------|---------|----------|---------|---------|---------|---------|---------|---------|---------|---------|-----------------------|-----------------------|---------|---------|---------|---------|----------|------------------------|------|------|------|------|------|------|------|------|------|------|------|------|------|------|------|------|------|------|-------|------|------|------|------|------|------|----------------------|------|------|-------|------|------|------|------|------|-------|-------|-------|------|-------|------|-------|------|------|------|--------|-------|------|------|------|------|-------|-------|------|------|-------|------|-------|------|------|-------|------|------|------|------|------|------|------|-------|-------|------|------|------|------|------|-------|------|------|----------|----|---|----|----|---|-----|----|----|----|----|-----|----|-----|--|--|--|--|--|-------------------|-------------------|----|-------|--|--|-----|-----------|------|-------|--|-------|--|-------|------|--|-------|------|----|--|--|-------|------|--|--|--|-----|-----|------|------|--|--|------|
| 1                                                                                                                                                                                                                                                                                                                                                                                                                                                                                                                                                                                                                                                                                                                                                                                                                                                                                                                                                                                                                                                                                                                                                                                                                                                                                                                                                                                                                                                                                                                                                                                                                                                                                                                                                                                                                                                                                                                                                                                                                                                                                                                                                                                                                                                                                                                                                                                                                                                                                                             | 15.68  | 78.9    | 9      | 7/25             | K278k          | (K)A L N M A I P G G P K F E P L V R (D) | 1810.0044                       | 114.0546                   | 6.0                         | 273601.9/8.95   | HUMAN   | Q6P2Q9      | 520433            | Pre-mRNA-processing-splicing factor 8 OS=Homo sapiens GN=PRPF8 PE=1 SV=2 |                    |         |         |         |                       |                       |         |         |         |         |          |         |         |         |         |         |         |         |         |                       |                       |         |         |         |         |          |                        |      |      |      |      |      |      |      |      |      |      |      |      |      |      |      |      |      |      |       |      |      |      |      |      |      |                      |      |      |       |      |      |      |      |      |       |       |       |      |       |      |       |      |      |      |        |       |      |      |      |      |       |       |      |      |       |      |       |      |      |       |      |      |      |      |      |      |      |       |       |      |      |      |      |      |       |      |      |          |    |   |    |    |   |     |    |    |    |    |     |    |     |  |  |  |  |  |                   |                   |    |       |  |  |     |           |      |       |  |       |  |       |      |  |       |      |    |  |  |       |      |  |  |  |     |     |      |      |  |  |      |
| <table border="1"> <thead> <tr> <th>Fragment-Ion (m/z)</th> <th>70.067</th> <th>72.079</th> <th>84.080</th> <th>86.095</th> <th>87.051</th> <th>120.078</th> <th>129.102</th> <th>136.069</th> <th>157.133</th> <th>185.134</th> <th>246.093</th> <th>299.181</th> <th>317.128</th> <th>484.318</th> <th>550.313</th> <th>587.339</th> <th>599.332</th> <th>613.369</th> <th>655.870<sup>+2</sup></th> <th>712.408<sup>+2</sup></th> <th>760.444</th> <th>769.422</th> <th>791.382</th> <th>827.419</th> <th>1310.715</th> </tr> </thead> <tbody> <tr> <td>Frac. Inten.(% of TIC)</td> <td>0.00</td> <td>0.23</td> <td>7.15</td> <td>0.40</td> <td>2.39</td> <td>0.16</td> <td>0.08</td> <td>2.13</td> <td>5.99</td> <td>4.07</td> <td>3.85</td> <td>2.13</td> <td>8.48</td> <td>2.56</td> <td>3.45</td> <td>2.67</td> <td>2.15</td> <td>2.21</td> <td>30.55</td> <td>6.04</td> <td>2.66</td> <td>2.01</td> <td>2.31</td> <td>2.25</td> <td>4.06</td> </tr> <tr> <td>Rel. Inten.(% of BP)</td> <td>0.01</td> <td>0.74</td> <td>23.41</td> <td>1.32</td> <td>7.82</td> <td>0.53</td> <td>0.28</td> <td>6.99</td> <td>19.62</td> <td>13.32</td> <td>12.60</td> <td>6.97</td> <td>27.75</td> <td>8.40</td> <td>11.29</td> <td>8.75</td> <td>7.03</td> <td>7.25</td> <td>100.00</td> <td>19.78</td> <td>8.72</td> <td>6.57</td> <td>7.55</td> <td>7.37</td> <td>13.29</td> </tr> <tr> <td>Score</td> <td>0.20</td> <td>0.50</td> <td>-0.23</td> <td>0.22</td> <td>-0.08</td> <td>1.00</td> <td>0.20</td> <td>-0.07</td> <td>0.50</td> <td>0.75</td> <td>0.75</td> <td>0.50</td> <td>0.75</td> <td>1.50</td> <td>1.50</td> <td>-0.09</td> <td>-0.07</td> <td>1.50</td> <td>1.50</td> <td>1.50</td> <td>1.50</td> <td>0.50</td> <td>-0.07</td> <td>1.50</td> <td>1.50</td> </tr> <tr> <td>Ion-type</td> <td>PR</td> <td>V</td> <td>LI</td> <td>LI</td> <td>F</td> <td>RKQ</td> <td>a2</td> <td>b2</td> <td>NM</td> <td>b3</td> <td>NMA</td> <td>y4</td> <td>y+8</td> <td></td> <td></td> <td></td> <td></td> <td></td> <td>y11<sup>+2</sup></td> <td>y12<sup>+2</sup></td> <td>y6</td> <td>b++14</td> <td></td> <td></td> <td>y11</td> </tr> <tr> <td>Delta ppm</td> <td>23.9</td> <td>-20.5</td> <td></td> <td>-13.1</td> <td></td> <td>-21.4</td> <td>-0.3</td> <td></td> <td>-11.7</td> <td>23.5</td> <td>AI</td> <td></td> <td></td> <td>-13.0</td> <td>-6.8</td> <td></td> <td></td> <td></td> <td>3.6</td> <td>8.8</td> <td>11.3</td> <td>34.5</td> <td></td> <td></td> <td>-5.0</td> </tr> </tbody> </table> |        |         |        |                  |                |                                          |                                 |                            |                             |                 |         |             |                   |                                                                          | Fragment-Ion (m/z) | 70.067  | 72.079  | 84.080  | 86.095                | 87.051                | 120.078 | 129.102 | 136.069 | 157.133 | 185.134  | 246.093 | 299.181 | 317.128 | 484.318 | 550.313 | 587.339 | 599.332 | 613.369 | 655.870 <sup>+2</sup> | 712.408 <sup>+2</sup> | 760.444 | 769.422 | 791.382 | 827.419 | 1310.715 | Frac. Inten.(% of TIC) | 0.00 | 0.23 | 7.15 | 0.40 | 2.39 | 0.16 | 0.08 | 2.13 | 5.99 | 4.07 | 3.85 | 2.13 | 8.48 | 2.56 | 3.45 | 2.67 | 2.15 | 2.21 | 30.55 | 6.04 | 2.66 | 2.01 | 2.31 | 2.25 | 4.06 | Rel. Inten.(% of BP) | 0.01 | 0.74 | 23.41 | 1.32 | 7.82 | 0.53 | 0.28 | 6.99 | 19.62 | 13.32 | 12.60 | 6.97 | 27.75 | 8.40 | 11.29 | 8.75 | 7.03 | 7.25 | 100.00 | 19.78 | 8.72 | 6.57 | 7.55 | 7.37 | 13.29 | Score | 0.20 | 0.50 | -0.23 | 0.22 | -0.08 | 1.00 | 0.20 | -0.07 | 0.50 | 0.75 | 0.75 | 0.50 | 0.75 | 1.50 | 1.50 | -0.09 | -0.07 | 1.50 | 1.50 | 1.50 | 1.50 | 0.50 | -0.07 | 1.50 | 1.50 | Ion-type | PR | V | LI | LI | F | RKQ | a2 | b2 | NM | b3 | NMA | y4 | y+8 |  |  |  |  |  | y11 <sup>+2</sup> | y12 <sup>+2</sup> | y6 | b++14 |  |  | y11 | Delta ppm | 23.9 | -20.5 |  | -13.1 |  | -21.4 | -0.3 |  | -11.7 | 23.5 | AI |  |  | -13.0 | -6.8 |  |  |  | 3.6 | 8.8 | 11.3 | 34.5 |  |  | -5.0 |
| Fragment-Ion (m/z)                                                                                                                                                                                                                                                                                                                                                                                                                                                                                                                                                                                                                                                                                                                                                                                                                                                                                                                                                                                                                                                                                                                                                                                                                                                                                                                                                                                                                                                                                                                                                                                                                                                                                                                                                                                                                                                                                                                                                                                                                                                                                                                                                                                                                                                                                                                                                                                                                                                                                            | 70.067 | 72.079  | 84.080 | 86.095           | 87.051         | 120.078                                  | 129.102                         | 136.069                    | 157.133                     | 185.134         | 246.093 | 299.181     | 317.128           | 484.318                                                                  | 550.313            | 587.339 | 599.332 | 613.369 | 655.870 <sup>+2</sup> | 712.408 <sup>+2</sup> | 760.444 | 769.422 | 791.382 | 827.419 | 1310.715 |         |         |         |         |         |         |         |         |                       |                       |         |         |         |         |          |                        |      |      |      |      |      |      |      |      |      |      |      |      |      |      |      |      |      |      |       |      |      |      |      |      |      |                      |      |      |       |      |      |      |      |      |       |       |       |      |       |      |       |      |      |      |        |       |      |      |      |      |       |       |      |      |       |      |       |      |      |       |      |      |      |      |      |      |      |       |       |      |      |      |      |      |       |      |      |          |    |   |    |    |   |     |    |    |    |    |     |    |     |  |  |  |  |  |                   |                   |    |       |  |  |     |           |      |       |  |       |  |       |      |  |       |      |    |  |  |       |      |  |  |  |     |     |      |      |  |  |      |
| Frac. Inten.(% of TIC)                                                                                                                                                                                                                                                                                                                                                                                                                                                                                                                                                                                                                                                                                                                                                                                                                                                                                                                                                                                                                                                                                                                                                                                                                                                                                                                                                                                                                                                                                                                                                                                                                                                                                                                                                                                                                                                                                                                                                                                                                                                                                                                                                                                                                                                                                                                                                                                                                                                                                        | 0.00   | 0.23    | 7.15   | 0.40             | 2.39           | 0.16                                     | 0.08                            | 2.13                       | 5.99                        | 4.07            | 3.85    | 2.13        | 8.48              | 2.56                                                                     | 3.45               | 2.67    | 2.15    | 2.21    | 30.55                 | 6.04                  | 2.66    | 2.01    | 2.31    | 2.25    | 4.06     |         |         |         |         |         |         |         |         |                       |                       |         |         |         |         |          |                        |      |      |      |      |      |      |      |      |      |      |      |      |      |      |      |      |      |      |       |      |      |      |      |      |      |                      |      |      |       |      |      |      |      |      |       |       |       |      |       |      |       |      |      |      |        |       |      |      |      |      |       |       |      |      |       |      |       |      |      |       |      |      |      |      |      |      |      |       |       |      |      |      |      |      |       |      |      |          |    |   |    |    |   |     |    |    |    |    |     |    |     |  |  |  |  |  |                   |                   |    |       |  |  |     |           |      |       |  |       |  |       |      |  |       |      |    |  |  |       |      |  |  |  |     |     |      |      |  |  |      |
| Rel. Inten.(% of BP)                                                                                                                                                                                                                                                                                                                                                                                                                                                                                                                                                                                                                                                                                                                                                                                                                                                                                                                                                                                                                                                                                                                                                                                                                                                                                                                                                                                                                                                                                                                                                                                                                                                                                                                                                                                                                                                                                                                                                                                                                                                                                                                                                                                                                                                                                                                                                                                                                                                                                          | 0.01   | 0.74    | 23.41  | 1.32             | 7.82           | 0.53                                     | 0.28                            | 6.99                       | 19.62                       | 13.32           | 12.60   | 6.97        | 27.75             | 8.40                                                                     | 11.29              | 8.75    | 7.03    | 7.25    | 100.00                | 19.78                 | 8.72    | 6.57    | 7.55    | 7.37    | 13.29    |         |         |         |         |         |         |         |         |                       |                       |         |         |         |         |          |                        |      |      |      |      |      |      |      |      |      |      |      |      |      |      |      |      |      |      |       |      |      |      |      |      |      |                      |      |      |       |      |      |      |      |      |       |       |       |      |       |      |       |      |      |      |        |       |      |      |      |      |       |       |      |      |       |      |       |      |      |       |      |      |      |      |      |      |      |       |       |      |      |      |      |      |       |      |      |          |    |   |    |    |   |     |    |    |    |    |     |    |     |  |  |  |  |  |                   |                   |    |       |  |  |     |           |      |       |  |       |  |       |      |  |       |      |    |  |  |       |      |  |  |  |     |     |      |      |  |  |      |
| Score                                                                                                                                                                                                                                                                                                                                                                                                                                                                                                                                                                                                                                                                                                                                                                                                                                                                                                                                                                                                                                                                                                                                                                                                                                                                                                                                                                                                                                                                                                                                                                                                                                                                                                                                                                                                                                                                                                                                                                                                                                                                                                                                                                                                                                                                                                                                                                                                                                                                                                         | 0.20   | 0.50    | -0.23  | 0.22             | -0.08          | 1.00                                     | 0.20                            | -0.07                      | 0.50                        | 0.75            | 0.75    | 0.50        | 0.75              | 1.50                                                                     | 1.50               | -0.09   | -0.07   | 1.50    | 1.50                  | 1.50                  | 1.50    | 0.50    | -0.07   | 1.50    | 1.50     |         |         |         |         |         |         |         |         |                       |                       |         |         |         |         |          |                        |      |      |      |      |      |      |      |      |      |      |      |      |      |      |      |      |      |      |       |      |      |      |      |      |      |                      |      |      |       |      |      |      |      |      |       |       |       |      |       |      |       |      |      |      |        |       |      |      |      |      |       |       |      |      |       |      |       |      |      |       |      |      |      |      |      |      |      |       |       |      |      |      |      |      |       |      |      |          |    |   |    |    |   |     |    |    |    |    |     |    |     |  |  |  |  |  |                   |                   |    |       |  |  |     |           |      |       |  |       |  |       |      |  |       |      |    |  |  |       |      |  |  |  |     |     |      |      |  |  |      |
| Ion-type                                                                                                                                                                                                                                                                                                                                                                                                                                                                                                                                                                                                                                                                                                                                                                                                                                                                                                                                                                                                                                                                                                                                                                                                                                                                                                                                                                                                                                                                                                                                                                                                                                                                                                                                                                                                                                                                                                                                                                                                                                                                                                                                                                                                                                                                                                                                                                                                                                                                                                      | PR     | V       | LI     | LI               | F              | RKQ                                      | a2                              | b2                         | NM                          | b3              | NMA     | y4          | y+8               |                                                                          |                    |         |         |         | y11 <sup>+2</sup>     | y12 <sup>+2</sup>     | y6      | b++14   |         |         | y11      |         |         |         |         |         |         |         |         |                       |                       |         |         |         |         |          |                        |      |      |      |      |      |      |      |      |      |      |      |      |      |      |      |      |      |      |       |      |      |      |      |      |      |                      |      |      |       |      |      |      |      |      |       |       |       |      |       |      |       |      |      |      |        |       |      |      |      |      |       |       |      |      |       |      |       |      |      |       |      |      |      |      |      |      |      |       |       |      |      |      |      |      |       |      |      |          |    |   |    |    |   |     |    |    |    |    |     |    |     |  |  |  |  |  |                   |                   |    |       |  |  |     |           |      |       |  |       |  |       |      |  |       |      |    |  |  |       |      |  |  |  |     |     |      |      |  |  |      |
| Delta ppm                                                                                                                                                                                                                                                                                                                                                                                                                                                                                                                                                                                                                                                                                                                                                                                                                                                                                                                                                                                                                                                                                                                                                                                                                                                                                                                                                                                                                                                                                                                                                                                                                                                                                                                                                                                                                                                                                                                                                                                                                                                                                                                                                                                                                                                                                                                                                                                                                                                                                                     | 23.9   | -20.5   |        | -13.1            |                | -21.4                                    | -0.3                            |                            | -11.7                       | 23.5            | AI      |             |                   | -13.0                                                                    | -6.8               |         |         |         | 3.6                   | 8.8                   | 11.3    | 34.5    |         |         | -5.0     |         |         |         |         |         |         |         |         |                       |                       |         |         |         |         |          |                        |      |      |      |      |      |      |      |      |      |      |      |      |      |      |      |      |      |      |       |      |      |      |      |      |      |                      |      |      |       |      |      |      |      |      |       |       |       |      |       |      |       |      |      |      |        |       |      |      |      |      |       |       |      |      |       |      |       |      |      |       |      |      |      |      |      |      |      |       |       |      |      |      |      |      |       |      |      |          |    |   |    |    |   |     |    |    |    |    |     |    |     |  |  |  |  |  |                   |                   |    |       |  |  |     |           |      |       |  |       |  |       |      |  |       |      |    |  |  |       |      |  |  |  |     |     |      |      |  |  |      |

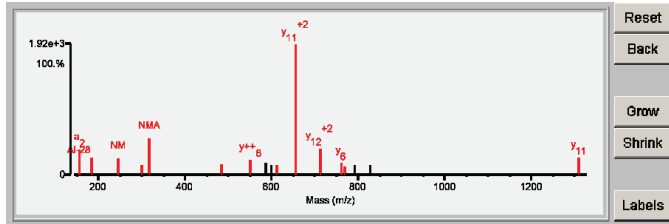



Result Summary

| Rank | Score | SPI (%) | BCS | # Unmatched Ions | Variable sites | Sequence                  | MH <sup>+</sup> Calculated (Da) | MH <sup>+</sup> Error (Da) | MH <sup>+</sup> Error (ppm) | Protein MW/Pl (Da) | Species | Accession # | Protein Name                                                             |
|------|-------|---------|-----|------------------|----------------|---------------------------|---------------------------------|----------------------------|-----------------------------|--------------------|---------|-------------|--------------------------------------------------------------------------|
| 1    | 15.85 | 74.2    | 8   | 9/25             | K727k          | (K)ANIPWKVPLPTPIENMILR(Y) | 2259.2682                       | 114.0569                   | 5.9                         | 273601.9/8.95      | HUMAN   | Q6P2Q9      | Pre-mRNA-processing-splicing factor 8 OS=Homo sapiens GN=PRPF8 PE=1 SV=2 |

Detailed Results

| Rank                   | Score  | SPI (%) | BCS     | # Unmatched Ions | Variable sites | Sequence                                     | MH <sup>+</sup> Calculated (Da) | MH <sup>+</sup> Error (Da) | MH <sup>+</sup> Error (ppm) | Protein MW/Pl (Da) | Species | Accession #           | MS-Digest Index # | Protein Name                                                             |         |                       |         |         |         |         |         |                        |          |          |          |
|------------------------|--------|---------|---------|------------------|----------------|----------------------------------------------|---------------------------------|----------------------------|-----------------------------|--------------------|---------|-----------------------|-------------------|--------------------------------------------------------------------------|---------|-----------------------|---------|---------|---------|---------|---------|------------------------|----------|----------|----------|
| 1                      | 15.85  | 74.2    | 8       | 9/25             | K727k          | (K)A N I P W K V P L P T P I E N M I L R (Y) | 2259.2682                       | 114.0569                   | 5.9                         | 273601.9/8.95      | HUMAN   | Q6P2Q9                | 520433            | Pre-mRNA-processing-splicing factor 8 OS=Homo sapiens GN=PRPF8 PE=1 SV=2 |         |                       |         |         |         |         |         |                        |          |          |          |
| Fragment-ion (m/z)     | 84.081 | 86.097  | 171.109 | 175.112          | 186.084        | 187.088                                      | 215.138                         | 288.197                    | 341.087                     | 493.279            | 571.221 | 581.844 <sup>+2</sup> | 592.324           | 623.868                                                                  | 625.344 | 725.926 <sup>+2</sup> | 775.417 | 866.511 | 892.483 | 910.280 | 985.544 | 1038.081 <sup>+2</sup> | 1183.653 | 1190.640 | 1450.766 |
| Frac. Inten.(% of TIC) | 3.98   | 0.18    | 3.57    | 3.36             | 7.21           | 3.72                                         | 2.59                            | 3.58                       | 2.22                        | 8.30               | 2.85    | 6.63                  | 5.21              | 2.42                                                                     | 3.67    | 4.28                  | 2.35    | 2.59    | 3.11    | 2.35    | 4.49    | 10.89                  | 5.15     | 2.84     | 2.46     |
| Rel. Inten.(% of BP)   | 36.58  | 1.62    | 32.77   | 30.91            | 66.19          | 34.22                                        | 23.82                           | 32.90                      | 20.42                       | 76.29              | 26.15   | 60.87                 | 47.85             | 22.19                                                                    | 33.74   | 39.33                 | 21.63   | 23.75   | 28.53   | 21.61   | 41.25   | 100.00                 | 47.33    | 26.09    | 22.63    |
| Score                  | -0.37  | 0.22    | 0.75    | 1.50             | 0.50           | -0.34                                        | -0.24                           | 1.50                       | -0.20                       | 1.50               | -0.26   | 0.50                  | 1.50              | -0.22                                                                    | 0.75    | 1.50                  | 1.50    | -0.24   | -0.29   | -0.22   | 1.50    | 1.50                   | 1.50     | 0.50     | 1.50     |
| Ion-type               |        | LI      | GL      | Y1               | b2             |                                              |                                 | Y2                         |                             | Y++8               |         | a10 <sup>+2</sup>     | Y++10             |                                                                          | WKVP    | Y13 <sup>+2</sup>     | Y6      |         |         |         | Y8      | Y17 <sup>+2</sup>      | Y10      | b10      | Y13      |
| Delta ppm              |        | 0.9     | -29.2   | -38.0            | -25.9          |                                              |                                 | -19.1                      |                             | 0.0                |         | 6.1                   | -7.8              |                                                                          | -4.4    | 25.1                  | 4.5     |         |         |         | -5.8    | 3.2                    | 2.2      | -24.8    | -29.6    |

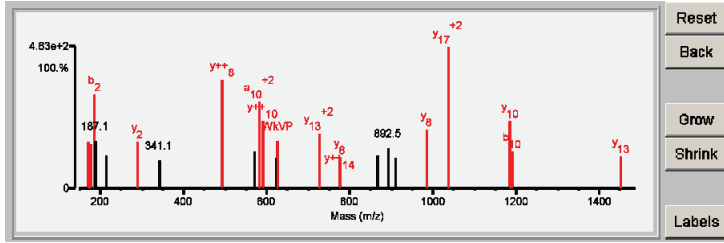

Result Summary

| Rank | Score | SPI (%) | BCS | # Unmatched Ions | Variable sites | Sequence                                    | MH <sup>+</sup> Calculated (Da) | MH <sup>+</sup> Error (Da) | MH <sup>+</sup> Error (ppm) | Protein MW/pi (Da) | Species | Accession # | Protein Name                                                          |
|------|-------|---------|-----|------------------|----------------|---------------------------------------------|---------------------------------|----------------------------|-----------------------------|--------------------|---------|-------------|-----------------------------------------------------------------------|
| 1    | 10.96 | 58.1    | 9   | 13/25            | K24k           | (K)DAEAEGLSGTTL <del>LLPK</del> LIPSGAGR(E) | 2253.2085                       | 114.0725                   | 12.5                        | 20648.1/6.83       | HUMAN   | Q9UI14      | Prenylated Rab acceptor protein 1 OS=Homo sapiens GN=RABAC1 PE=1 SV=1 |

Detailed Results

| Rank                                                                                                                                                                                                                                                                                                                                                                                                                                                                                                                                                                                                                                                                                                                                                                                                                                                                                                                                                                                                                                                                                                                                                                                                                                                                                                                                                                                                                                                                                                                                                                                                                                                                                                                                                                                                                                                                                                                                                                                                                                                                                                                                                                                                                                                                                                                                                                                                                                                                                                                                                                 | Score  | SPI (%) | BCS            | # Unmatched Ions | Variable sites | Sequence                                                     | MH <sup>+</sup> Calculated (Da) | MH <sup>+</sup> Error (Da) | MH <sup>+</sup> Error (ppm) | Protein MW/pi (Da) | Species        | Accession # | MS-Digest Index # | Protein Name                                                          |                    |         |                   |                |         |         |         |                   |         |                 |          |         |           |         |           |         |         |         |         |         |         |         |           |         |         |          |                         |      |      |      |      |      |      |      |      |      |      |      |      |      |       |      |      |      |      |      |      |      |      |      |      |      |                       |       |       |       |       |       |       |       |       |       |       |       |       |       |        |       |       |       |       |       |       |       |       |       |       |       |       |       |       |      |      |       |      |       |       |      |       |      |       |      |      |       |       |      |      |       |       |      |       |      |       |      |          |  |  |                |    |  |                |  |  |    |  |                |  |                |                               |  |  |                   |                |  |  |  |                   |  |                 |           |  |  |       |      |  |      |  |  |     |  |       |  |      |      |  |  |     |      |  |  |  |  |       |  |     |
|----------------------------------------------------------------------------------------------------------------------------------------------------------------------------------------------------------------------------------------------------------------------------------------------------------------------------------------------------------------------------------------------------------------------------------------------------------------------------------------------------------------------------------------------------------------------------------------------------------------------------------------------------------------------------------------------------------------------------------------------------------------------------------------------------------------------------------------------------------------------------------------------------------------------------------------------------------------------------------------------------------------------------------------------------------------------------------------------------------------------------------------------------------------------------------------------------------------------------------------------------------------------------------------------------------------------------------------------------------------------------------------------------------------------------------------------------------------------------------------------------------------------------------------------------------------------------------------------------------------------------------------------------------------------------------------------------------------------------------------------------------------------------------------------------------------------------------------------------------------------------------------------------------------------------------------------------------------------------------------------------------------------------------------------------------------------------------------------------------------------------------------------------------------------------------------------------------------------------------------------------------------------------------------------------------------------------------------------------------------------------------------------------------------------------------------------------------------------------------------------------------------------------------------------------------------------|--------|---------|----------------|------------------|----------------|--------------------------------------------------------------|---------------------------------|----------------------------|-----------------------------|--------------------|----------------|-------------|-------------------|-----------------------------------------------------------------------|--------------------|---------|-------------------|----------------|---------|---------|---------|-------------------|---------|-----------------|----------|---------|-----------|---------|-----------|---------|---------|---------|---------|---------|---------|---------|-----------|---------|---------|----------|-------------------------|------|------|------|------|------|------|------|------|------|------|------|------|------|-------|------|------|------|------|------|------|------|------|------|------|------|-----------------------|-------|-------|-------|-------|-------|-------|-------|-------|-------|-------|-------|-------|-------|--------|-------|-------|-------|-------|-------|-------|-------|-------|-------|-------|-------|-------|-------|-------|------|------|-------|------|-------|-------|------|-------|------|-------|------|------|-------|-------|------|------|-------|-------|------|-------|------|-------|------|----------|--|--|----------------|----|--|----------------|--|--|----|--|----------------|--|----------------|-------------------------------|--|--|-------------------|----------------|--|--|--|-------------------|--|-----------------|-----------|--|--|-------|------|--|------|--|--|-----|--|-------|--|------|------|--|--|-----|------|--|--|--|--|-------|--|-----|
| 1                                                                                                                                                                                                                                                                                                                                                                                                                                                                                                                                                                                                                                                                                                                                                                                                                                                                                                                                                                                                                                                                                                                                                                                                                                                                                                                                                                                                                                                                                                                                                                                                                                                                                                                                                                                                                                                                                                                                                                                                                                                                                                                                                                                                                                                                                                                                                                                                                                                                                                                                                                    | 10.96  | 58.1    | 9              | 13/25            | K24k           | (K)D A E A E / G L S G T T L / P k / L / I / P S G A G R (E) | 2253.2085                       | 114.0725                   | 12.5                        | 20648.1/6.83       | HUMAN          | Q9UI14      | 515311            | Prenylated Rab acceptor protein 1 OS=Homo sapiens GN=RABAC1 PE=1 SV=1 |                    |         |                   |                |         |         |         |                   |         |                 |          |         |           |         |           |         |         |         |         |         |         |         |           |         |         |          |                         |      |      |      |      |      |      |      |      |      |      |      |      |      |       |      |      |      |      |      |      |      |      |      |      |      |                       |       |       |       |       |       |       |       |       |       |       |       |       |       |        |       |       |       |       |       |       |       |       |       |       |       |       |       |       |      |      |       |      |       |       |      |       |      |       |      |      |       |       |      |      |       |       |      |       |      |       |      |          |  |  |                |    |  |                |  |  |    |  |                |  |                |                               |  |  |                   |                |  |  |  |                   |  |                 |           |  |  |       |      |  |      |  |  |     |  |       |  |      |      |  |  |     |      |  |  |  |  |       |  |     |
| <table border="1"> <thead> <tr> <th>Fragment-ion (m/z)</th> <th>84.077</th> <th>123.083</th> <th>187.070</th> <th>201.128</th> <th>313.992</th> <th>316.126</th> <th>328.123</th> <th>331.197</th> <th>340.201</th> <th>343.128</th> <th>387.136</th> <th>480.754*2</th> <th>544.293</th> <th>555.322*2</th> <th>558.386</th> <th>577.322</th> <th>611.873</th> <th>657.364</th> <th>677.853</th> <th>722.382</th> <th>770.462</th> <th>837.876*2</th> <th>926.526</th> <th>957.452</th> <th>1109.649</th> </tr> </thead> <tbody> <tr> <td>Frac. Inten. (% of TIC)</td> <td>4.47</td> <td>2.32</td> <td>3.30</td> <td>2.36</td> <td>2.31</td> <td>2.63</td> <td>2.77</td> <td>5.06</td> <td>4.13</td> <td>2.44</td> <td>2.23</td> <td>2.24</td> <td>7.77</td> <td>13.80</td> <td>4.99</td> <td>2.28</td> <td>3.75</td> <td>3.64</td> <td>2.82</td> <td>3.74</td> <td>3.58</td> <td>3.72</td> <td>4.67</td> <td>2.73</td> <td>6.23</td> </tr> <tr> <td>Rel. Inten. (% of BP)</td> <td>32.38</td> <td>16.82</td> <td>23.94</td> <td>17.12</td> <td>16.76</td> <td>19.09</td> <td>20.05</td> <td>36.68</td> <td>29.92</td> <td>17.71</td> <td>16.19</td> <td>16.22</td> <td>56.31</td> <td>100.00</td> <td>36.15</td> <td>16.55</td> <td>27.20</td> <td>26.39</td> <td>20.47</td> <td>27.14</td> <td>25.94</td> <td>26.99</td> <td>33.84</td> <td>19.78</td> <td>45.18</td> </tr> <tr> <td>Score</td> <td>-0.32</td> <td>-0.17</td> <td>0.75</td> <td>0.75</td> <td>-0.17</td> <td>0.50</td> <td>-0.20</td> <td>-0.37</td> <td>0.75</td> <td>-0.18</td> <td>0.75</td> <td>-0.16</td> <td>1.50</td> <td>1.50</td> <td>-0.36</td> <td>-0.17</td> <td>1.50</td> <td>1.50</td> <td>-0.20</td> <td>-0.27</td> <td>1.50</td> <td>-0.27</td> <td>1.50</td> <td>-0.20</td> <td>1.50</td> </tr> <tr> <td>Ion-type</td> <td></td> <td></td> <td>b<sub>2</sub></td> <td>LS</td> <td></td> <td>b<sub>3</sub></td> <td></td> <td></td> <td>Pk</td> <td></td> <td>b<sub>4</sub></td> <td></td> <td>y<sub>6</sub></td> <td>y<sub>10</sub><sup>+2</sup></td> <td></td> <td></td> <td>y<sup>++11</sup></td> <td>y<sub>7</sub></td> <td></td> <td></td> <td></td> <td>y<sup>++18</sup></td> <td></td> <td>y<sub>10</sub></td> </tr> <tr> <td>Delta ppm</td> <td></td> <td></td> <td>-13.0</td> <td>17.6</td> <td></td> <td>33.8</td> <td></td> <td></td> <td>6.7</td> <td></td> <td>-40.9</td> <td></td> <td>16.9</td> <td>-5.8</td> <td></td> <td></td> <td>9.6</td> <td>-6.0</td> <td></td> <td></td> <td></td> <td></td> <td>-10.9</td> <td></td> <td>6.1</td> </tr> </tbody> </table> |        |         |                |                  |                |                                                              |                                 |                            |                             |                    |                |             |                   |                                                                       | Fragment-ion (m/z) | 84.077  | 123.083           | 187.070        | 201.128 | 313.992 | 316.126 | 328.123           | 331.197 | 340.201         | 343.128  | 387.136 | 480.754*2 | 544.293 | 555.322*2 | 558.386 | 577.322 | 611.873 | 657.364 | 677.853 | 722.382 | 770.462 | 837.876*2 | 926.526 | 957.452 | 1109.649 | Frac. Inten. (% of TIC) | 4.47 | 2.32 | 3.30 | 2.36 | 2.31 | 2.63 | 2.77 | 5.06 | 4.13 | 2.44 | 2.23 | 2.24 | 7.77 | 13.80 | 4.99 | 2.28 | 3.75 | 3.64 | 2.82 | 3.74 | 3.58 | 3.72 | 4.67 | 2.73 | 6.23 | Rel. Inten. (% of BP) | 32.38 | 16.82 | 23.94 | 17.12 | 16.76 | 19.09 | 20.05 | 36.68 | 29.92 | 17.71 | 16.19 | 16.22 | 56.31 | 100.00 | 36.15 | 16.55 | 27.20 | 26.39 | 20.47 | 27.14 | 25.94 | 26.99 | 33.84 | 19.78 | 45.18 | Score | -0.32 | -0.17 | 0.75 | 0.75 | -0.17 | 0.50 | -0.20 | -0.37 | 0.75 | -0.18 | 0.75 | -0.16 | 1.50 | 1.50 | -0.36 | -0.17 | 1.50 | 1.50 | -0.20 | -0.27 | 1.50 | -0.27 | 1.50 | -0.20 | 1.50 | Ion-type |  |  | b <sub>2</sub> | LS |  | b <sub>3</sub> |  |  | Pk |  | b <sub>4</sub> |  | y <sub>6</sub> | y <sub>10</sub> <sup>+2</sup> |  |  | y <sup>++11</sup> | y <sub>7</sub> |  |  |  | y <sup>++18</sup> |  | y <sub>10</sub> | Delta ppm |  |  | -13.0 | 17.6 |  | 33.8 |  |  | 6.7 |  | -40.9 |  | 16.9 | -5.8 |  |  | 9.6 | -6.0 |  |  |  |  | -10.9 |  | 6.1 |
| Fragment-ion (m/z)                                                                                                                                                                                                                                                                                                                                                                                                                                                                                                                                                                                                                                                                                                                                                                                                                                                                                                                                                                                                                                                                                                                                                                                                                                                                                                                                                                                                                                                                                                                                                                                                                                                                                                                                                                                                                                                                                                                                                                                                                                                                                                                                                                                                                                                                                                                                                                                                                                                                                                                                                   | 84.077 | 123.083 | 187.070        | 201.128          | 313.992        | 316.126                                                      | 328.123                         | 331.197                    | 340.201                     | 343.128            | 387.136        | 480.754*2   | 544.293           | 555.322*2                                                             | 558.386            | 577.322 | 611.873           | 657.364        | 677.853 | 722.382 | 770.462 | 837.876*2         | 926.526 | 957.452         | 1109.649 |         |           |         |           |         |         |         |         |         |         |         |           |         |         |          |                         |      |      |      |      |      |      |      |      |      |      |      |      |      |       |      |      |      |      |      |      |      |      |      |      |      |                       |       |       |       |       |       |       |       |       |       |       |       |       |       |        |       |       |       |       |       |       |       |       |       |       |       |       |       |       |      |      |       |      |       |       |      |       |      |       |      |      |       |       |      |      |       |       |      |       |      |       |      |          |  |  |                |    |  |                |  |  |    |  |                |  |                |                               |  |  |                   |                |  |  |  |                   |  |                 |           |  |  |       |      |  |      |  |  |     |  |       |  |      |      |  |  |     |      |  |  |  |  |       |  |     |
| Frac. Inten. (% of TIC)                                                                                                                                                                                                                                                                                                                                                                                                                                                                                                                                                                                                                                                                                                                                                                                                                                                                                                                                                                                                                                                                                                                                                                                                                                                                                                                                                                                                                                                                                                                                                                                                                                                                                                                                                                                                                                                                                                                                                                                                                                                                                                                                                                                                                                                                                                                                                                                                                                                                                                                                              | 4.47   | 2.32    | 3.30           | 2.36             | 2.31           | 2.63                                                         | 2.77                            | 5.06                       | 4.13                        | 2.44               | 2.23           | 2.24        | 7.77              | 13.80                                                                 | 4.99               | 2.28    | 3.75              | 3.64           | 2.82    | 3.74    | 3.58    | 3.72              | 4.67    | 2.73            | 6.23     |         |           |         |           |         |         |         |         |         |         |         |           |         |         |          |                         |      |      |      |      |      |      |      |      |      |      |      |      |      |       |      |      |      |      |      |      |      |      |      |      |      |                       |       |       |       |       |       |       |       |       |       |       |       |       |       |        |       |       |       |       |       |       |       |       |       |       |       |       |       |       |      |      |       |      |       |       |      |       |      |       |      |      |       |       |      |      |       |       |      |       |      |       |      |          |  |  |                |    |  |                |  |  |    |  |                |  |                |                               |  |  |                   |                |  |  |  |                   |  |                 |           |  |  |       |      |  |      |  |  |     |  |       |  |      |      |  |  |     |      |  |  |  |  |       |  |     |
| Rel. Inten. (% of BP)                                                                                                                                                                                                                                                                                                                                                                                                                                                                                                                                                                                                                                                                                                                                                                                                                                                                                                                                                                                                                                                                                                                                                                                                                                                                                                                                                                                                                                                                                                                                                                                                                                                                                                                                                                                                                                                                                                                                                                                                                                                                                                                                                                                                                                                                                                                                                                                                                                                                                                                                                | 32.38  | 16.82   | 23.94          | 17.12            | 16.76          | 19.09                                                        | 20.05                           | 36.68                      | 29.92                       | 17.71              | 16.19          | 16.22       | 56.31             | 100.00                                                                | 36.15              | 16.55   | 27.20             | 26.39          | 20.47   | 27.14   | 25.94   | 26.99             | 33.84   | 19.78           | 45.18    |         |           |         |           |         |         |         |         |         |         |         |           |         |         |          |                         |      |      |      |      |      |      |      |      |      |      |      |      |      |       |      |      |      |      |      |      |      |      |      |      |      |                       |       |       |       |       |       |       |       |       |       |       |       |       |       |        |       |       |       |       |       |       |       |       |       |       |       |       |       |       |      |      |       |      |       |       |      |       |      |       |      |      |       |       |      |      |       |       |      |       |      |       |      |          |  |  |                |    |  |                |  |  |    |  |                |  |                |                               |  |  |                   |                |  |  |  |                   |  |                 |           |  |  |       |      |  |      |  |  |     |  |       |  |      |      |  |  |     |      |  |  |  |  |       |  |     |
| Score                                                                                                                                                                                                                                                                                                                                                                                                                                                                                                                                                                                                                                                                                                                                                                                                                                                                                                                                                                                                                                                                                                                                                                                                                                                                                                                                                                                                                                                                                                                                                                                                                                                                                                                                                                                                                                                                                                                                                                                                                                                                                                                                                                                                                                                                                                                                                                                                                                                                                                                                                                | -0.32  | -0.17   | 0.75           | 0.75             | -0.17          | 0.50                                                         | -0.20                           | -0.37                      | 0.75                        | -0.18              | 0.75           | -0.16       | 1.50              | 1.50                                                                  | -0.36              | -0.17   | 1.50              | 1.50           | -0.20   | -0.27   | 1.50    | -0.27             | 1.50    | -0.20           | 1.50     |         |           |         |           |         |         |         |         |         |         |         |           |         |         |          |                         |      |      |      |      |      |      |      |      |      |      |      |      |      |       |      |      |      |      |      |      |      |      |      |      |      |                       |       |       |       |       |       |       |       |       |       |       |       |       |       |        |       |       |       |       |       |       |       |       |       |       |       |       |       |       |      |      |       |      |       |       |      |       |      |       |      |      |       |       |      |      |       |       |      |       |      |       |      |          |  |  |                |    |  |                |  |  |    |  |                |  |                |                               |  |  |                   |                |  |  |  |                   |  |                 |           |  |  |       |      |  |      |  |  |     |  |       |  |      |      |  |  |     |      |  |  |  |  |       |  |     |
| Ion-type                                                                                                                                                                                                                                                                                                                                                                                                                                                                                                                                                                                                                                                                                                                                                                                                                                                                                                                                                                                                                                                                                                                                                                                                                                                                                                                                                                                                                                                                                                                                                                                                                                                                                                                                                                                                                                                                                                                                                                                                                                                                                                                                                                                                                                                                                                                                                                                                                                                                                                                                                             |        |         | b <sub>2</sub> | LS               |                | b <sub>3</sub>                                               |                                 |                            | Pk                          |                    | b <sub>4</sub> |             | y <sub>6</sub>    | y <sub>10</sub> <sup>+2</sup>                                         |                    |         | y <sup>++11</sup> | y <sub>7</sub> |         |         |         | y <sup>++18</sup> |         | y <sub>10</sub> |          |         |           |         |           |         |         |         |         |         |         |         |           |         |         |          |                         |      |      |      |      |      |      |      |      |      |      |      |      |      |       |      |      |      |      |      |      |      |      |      |      |      |                       |       |       |       |       |       |       |       |       |       |       |       |       |       |        |       |       |       |       |       |       |       |       |       |       |       |       |       |       |      |      |       |      |       |       |      |       |      |       |      |      |       |       |      |      |       |       |      |       |      |       |      |          |  |  |                |    |  |                |  |  |    |  |                |  |                |                               |  |  |                   |                |  |  |  |                   |  |                 |           |  |  |       |      |  |      |  |  |     |  |       |  |      |      |  |  |     |      |  |  |  |  |       |  |     |
| Delta ppm                                                                                                                                                                                                                                                                                                                                                                                                                                                                                                                                                                                                                                                                                                                                                                                                                                                                                                                                                                                                                                                                                                                                                                                                                                                                                                                                                                                                                                                                                                                                                                                                                                                                                                                                                                                                                                                                                                                                                                                                                                                                                                                                                                                                                                                                                                                                                                                                                                                                                                                                                            |        |         | -13.0          | 17.6             |                | 33.8                                                         |                                 |                            | 6.7                         |                    | -40.9          |             | 16.9              | -5.8                                                                  |                    |         | 9.6               | -6.0           |         |         |         |                   | -10.9   |                 | 6.1      |         |           |         |           |         |         |         |         |         |         |         |           |         |         |          |                         |      |      |      |      |      |      |      |      |      |      |      |      |      |       |      |      |      |      |      |      |      |      |      |      |      |                       |       |       |       |       |       |       |       |       |       |       |       |       |       |        |       |       |       |       |       |       |       |       |       |       |       |       |       |       |      |      |       |      |       |       |      |       |      |       |      |      |       |       |      |      |       |       |      |       |      |       |      |          |  |  |                |    |  |                |  |  |    |  |                |  |                |                               |  |  |                   |                |  |  |  |                   |  |                 |           |  |  |       |      |  |      |  |  |     |  |       |  |      |      |  |  |     |      |  |  |  |  |       |  |     |

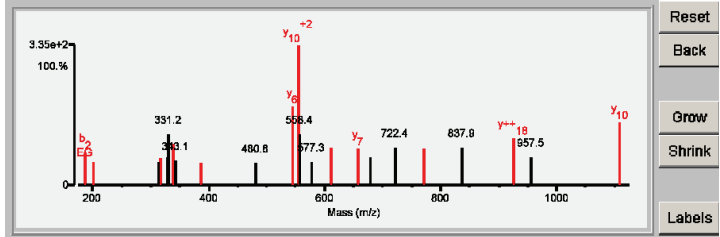

Result Summary

| Rank | Score | SPI (%) | BCS | # Unmatched Ions | Variable sites | Sequence               | MH <sup>+</sup> Calculated (Da) | MH <sup>+</sup> Error (Da) | MH <sup>+</sup> Error (ppm) | Protein MW/Pl (Da) | Species | Accession # | Protein Name                                                                 |
|------|-------|---------|-----|------------------|----------------|------------------------|---------------------------------|----------------------------|-----------------------------|--------------------|---------|-------------|------------------------------------------------------------------------------|
| 1    | 14.92 | 75.6    | 8   | 8/25             | K456k          | (R)ELIKVLEEANQAINPK(L) | 1809.0116                       | 114.0516                   | 4.5                         | 72371.8/8.82       | HUMAN   | Q92841      | Probable ATP-dependent RNA helicase DDX17 OS=Homo sapiens GN=DDX17 PE=1 SV=1 |

Detailed Results

| Rank | Score | SPI (%) | BCS | # Unmatched Ions | Variable sites | Sequence                               | MH <sup>+</sup> Calculated (Da) | MH <sup>+</sup> Error (Da) | MH <sup>+</sup> Error (ppm) | Protein MW/Pl (Da) | Species | Accession # | MS-Digest Index # | Protein Name                                                                 |
|------|-------|---------|-----|------------------|----------------|----------------------------------------|---------------------------------|----------------------------|-----------------------------|--------------------|---------|-------------|-------------------|------------------------------------------------------------------------------|
| 1    | 14.92 | 75.6    | 8   | 8/25             | K456k          | (R)E L I K V L E E A N Q A I N P K (L) | 1809.0116                       | 114.0516                   | 4.5                         | 72371.8/8.82       | HUMAN   | Q92841      | 154101            | Probable ATP-dependent RNA helicase DDX17 OS=Homo sapiens GN=DDX17 PE=1 SV=1 |

| Fragment-ion (m/z)     | 84.079 | 85.081 | 86.095 | 102.057 | 132.077 | 200.103 | 215.138 | 243.130 | 244.164 | 245.168 | 341.182 | 358.213 | 411.211 | 455.308 | 464.257 | 471.291 | 542.330 | 543.321 <sup>+2</sup> | 597.298 | 653.359 | 670.385 | 679.360 | 784.424 <sup>+2</sup> | 840.454 <sup>+2</sup> | 855.451 |
|------------------------|--------|--------|--------|---------|---------|---------|---------|---------|---------|---------|---------|---------|---------|---------|---------|---------|---------|-----------------------|---------|---------|---------|---------|-----------------------|-----------------------|---------|
| Frac. Inten.(% of TIC) | 0.36   | 2.45   | 0.40   | 0.22    | 3.45    | 2.72    | 4.98    | 4.96    | 4.32    | 2.73    | 5.23    | 11.91   | 2.76    | 4.31    | 2.58    | 6.59    | 4.83    | 3.36                  | 3.97    | 2.38    | 4.13    | 3.14    | 9.98                  | 4.86                  | 3.38    |
| Rel. Inten.(% of BP)   | 3.00   | 20.58  | 3.37   | 1.89    | 28.93   | 22.82   | 41.76   | 41.61   | 36.22   | 22.92   | 43.92   | 100.00  | 23.18   | 36.18   | 21.65   | 55.30   | 40.51   | 28.19                 | 33.36   | 19.96   | 34.69   | 26.37   | 83.75                 | 40.80                 | 28.35   |
| Score                  | 0.50   | -0.21  | 0.22   | 1.00    | -0.29   | 0.75    | 0.50    | 0.75    | 1.50    | -0.23   | 0.50    | 1.50    | -0.23   | 0.75    | -0.22   | 1.50    | 1.50    | -0.28                 | -0.33   | 0.50    | 1.50    | -0.26   | 1.50                  | 0.50                  | 1.50    |
| Ion-type               | KQ     |        | LI     | a1      |         | QA      | a2      | b2      | y2      |         | y3-NH3  | y3      |         | KVL     |         | y4      | y5      |                       |         | y6-NH3  | y6      |         | y13 <sup>+2</sup>     | b14 <sup>+2</sup>     | y8      |
| Delta ppm              | -16.4  |        | -17.7  | 6.3     |         | -6.3    | -8.4    | -21.1   | -5.2    |         | -1.0    | 11.5    |         | 20.3    |         | -3.1    | 0.6     |                       |         | -4.6    | -4.6    |         | -1.7                  | 2.4                   | -20.3   |
|                        |        |        |        | 1.00    |         |         | LE-28   | LE      |         |         |         |         |         |         |         |         |         |                       |         |         |         |         |                       |                       |         |
|                        |        |        |        | E       |         |         | -8.4    | -21.1   |         |         |         |         |         |         |         |         |         |                       |         |         |         |         |                       |                       |         |
|                        |        |        |        | 17.1    |         |         |         |         |         |         |         |         |         |         |         |         |         |                       |         |         |         |         |                       |                       |         |

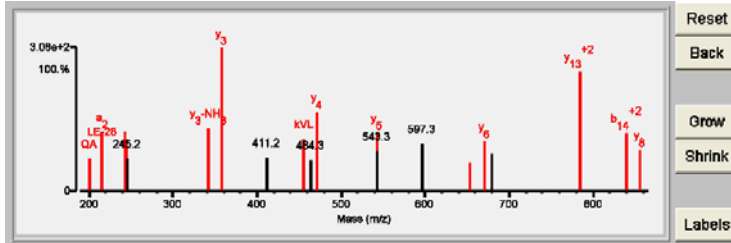

Reset

Back

Grow

Shrink

Labels

Result Summary

| Rank | Score | SPI (%) | BCS | # Unmatched Ions | Variable sites | Sequence                                               | MH <sup>+</sup> Calculated (Da) | MH <sup>+</sup> Error (Da) | MH <sup>+</sup> Error (ppm) | Protein MW/pi (Da) | Species | Accession # | Protein Name                                                               |
|------|-------|---------|-----|------------------|----------------|--------------------------------------------------------|---------------------------------|----------------------------|-----------------------------|--------------------|---------|-------------|----------------------------------------------------------------------------|
| 1    | 16.76 | 81.1    | 8   | 5/25             | K470k          | (R)E A N Q A / I N / P k / L / L / Q / L / V E D R (G) | 1951.0607                       | 114.0444                   | 0.7                         | 69148.5/9.06       | HUMAN   | P17844      | Probable ATP-dependent RNA helicase DDX5 OS=Homo sapiens GN=DDX5 PE=1 SV=1 |

Detailed Results

| Rank | Score | SPI (%) | BCS | # Unmatched Ions | Variable sites | Sequence                                               | MH <sup>+</sup> Calculated (Da) | MH <sup>+</sup> Error (Da) | MH <sup>+</sup> Error (ppm) | Protein MW/pi (Da) | Species | Accession # | MS-Digest Index # | Protein Name                                                               |
|------|-------|---------|-----|------------------|----------------|--------------------------------------------------------|---------------------------------|----------------------------|-----------------------------|--------------------|---------|-------------|-------------------|----------------------------------------------------------------------------|
| 1    | 16.76 | 81.1    | 8   | 5/25             | K470k          | (R)E A N Q A / I N / P k / L / L / Q / L / V E D R (G) | 1951.0607                       | 114.0444                   | 0.7                         | 69148.5/9.06       | HUMAN   | P17844      | 154367            | Probable ATP-dependent RNA helicase DDX5 OS=Homo sapiens GN=DDX5 PE=1 SV=1 |

  

| Fragment-ion (m/z)      | 72.083 | 84.081 | 86.096 | 101.071 | 136.074 | 242.149 | 314.144 | 371.202 <sup>+2</sup>             | 425.181             | 453.273 | 496.219             | 518.261 | 566.379 | 609.297 <sup>+2</sup> | 613.336             | 631.343 | 662.885 <sup>+2</sup> | 680.390 <sup>+2</sup> | 719.908            | 720.403 | 759.395 | 776.455 <sup>+2</sup> | 812.477 | 872.477 | 985.558 |
|-------------------------|--------|--------|--------|---------|---------|---------|---------|-----------------------------------|---------------------|---------|---------------------|---------|---------|-----------------------|---------------------|---------|-----------------------|-----------------------|--------------------|---------|---------|-----------------------|---------|---------|---------|
| Frac. Inten. (% of TIC) | 0.09   | 0.08   | 0.31   | 0.08    | 2.39    | 2.20    | 4.90    | 2.57                              | 2.22                | 3.67    | 5.14                | 5.45    | 3.24    | 3.13                  | 2.52                | 5.23    | 19.60                 | 3.03                  | 6.76               | 7.55    | 6.41    | 4.17                  | 2.76    | 3.30    | 3.18    |
| Rel. Inten. (% of BP)   | 0.46   | 0.43   | 1.60   | 0.41    | 12.22   | 11.23   | 25.01   | 13.12                             | 11.31               | 18.73   | 26.23               | 27.83   | 16.51   | 15.96                 | 12.86               | 26.68   | 100.00                | 15.46                 | 34.47              | 38.52   | 32.71   | 21.28                 | 14.06   | 16.86   | 16.22   |
| Score                   | 0.50   | 0.50   | 0.22   |         |         | 0.75    | 0.75    | 0.50                              | 0.25                | 0.75    | 0.25                | 1.50    | 0.75    | -0.16                 | 0.50                | 1.50    | 1.50                  | -0.15                 | 1.50               | -0.39   | 1.50    | 1.50                  | -0.14   | 1.50    | 1.50    |
| Ion-type                | V      | KQ     | LI     |         |         | QL      | NQA     | y6-H <sub>2</sub> O <sup>+2</sup> | b4-H <sub>2</sub> O | PKL     | b5-H <sub>2</sub> O | y4      | PKLL    |                       | y5-H <sub>2</sub> O | y5      |                       |                       | y <sup>+</sup> +11 |         | y6      | y12 <sup>+2</sup>     | y7      | y8      |         |
| Delta ppm               | 28.1   | -0.9   | -9.6   |         |         | -10.0   | -8.6    | 9.6                               | 5.6                 | -21.4   | 5.4                 | 8.9     | 20.2    |                       | 9.3                 | 3.1     | 3.2                   |                       | 5.0                |         | -6.5    | 11.2                  | -7.9    | -9.5    |         |

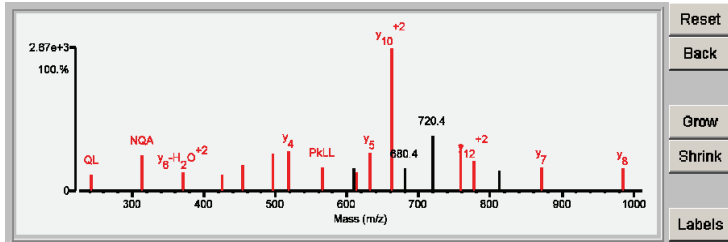

Result Summary

| Rank | Score | SPI (%) | BCS | # Unmatched Ions | Variable sites | Sequence                 | MH <sup>+</sup> Calculated (Da) | MH <sup>+</sup> Error (Da) | MH <sup>+</sup> Error (ppm) | Protein MW/pl (Da) | Species | Accession # | Protein Name                                 |
|------|-------|---------|-----|------------------|----------------|--------------------------|---------------------------------|----------------------------|-----------------------------|--------------------|---------|-------------|----------------------------------------------|
| 1    | 11.50 | 69.5    | 7   | 10/25            | K54k           | (K)TFVNIPTAEVGVLVGKDR(S) | 1915.0647                       | 114.0398                   | -1.5                        | 15054.3/8.44       | HUMAN   | P07737      | Profilin-1 OS=Homo sapiens GN=PFN1 PE=1 SV=2 |

Detailed Results

| Rank                   | Score  | SPI (%) | BCS    | # Unmatched Ions | Variable sites | Sequence                                           | MH <sup>+</sup> Calculated (Da) | MH <sup>+</sup> Error (Da) | MH <sup>+</sup> Error (ppm) | Protein MW/pl (Da) | Species                         | Accession #    | MS-Digest Index #  | Protein Name                                 |                               |                       |                    |                       |         |                       |         |         |         |          |          |  |
|------------------------|--------|---------|--------|------------------|----------------|----------------------------------------------------|---------------------------------|----------------------------|-----------------------------|--------------------|---------------------------------|----------------|--------------------|----------------------------------------------|-------------------------------|-----------------------|--------------------|-----------------------|---------|-----------------------|---------|---------|---------|----------|----------|--|
| 1                      | 11.50  | 69.5    | 7      | 10/25            | K54k           | (K)T F V N I / T P A E V / V G V L V / G k D R (S) | 1915.0647                       | 114.0398                   | -1.5                        | 15054.3/8.44       | HUMAN                           | P07737         | 519509             | Profilin-1 OS=Homo sapiens GN=PFN1 PE=1 SV=2 |                               |                       |                    |                       |         |                       |         |         |         |          |          |  |
| Fragment-ion (m/z)     | 70.066 | 72.080  | 84.079 | 86.096           | 221.126        | 228.124                                            | 249.120                         | 311.187                    | 413.200                     | 417.225            | 444.748 <sup>+2</sup>           | 558.289        | 589.303            | 614.850                                      | 632.317                       | 646.329 <sup>+2</sup> | 688.381            | 727.890 <sup>+2</sup> | 801.455 | 842.426 <sup>+2</sup> | 890.989 | 934.462 | 957.580 | 1056.602 | 1130.575 |  |
| Frac. Inten.(% of TIC) | 0.00   | 0.35    | 5.24   | 0.12             | 10.53          | 3.61                                               | 6.15                            | 3.40                       | 2.77                        | 2.59               | 2.90                            | 2.44           | 12.58              | 2.47                                         | 2.67                          | 3.04                  | 7.99               | 6.25                  | 6.93    | 2.51                  | 2.48    | 2.98    | 4.79    | 2.81     | 2.40     |  |
| Rel. Inten.(% of BP)   | 0.02   | 2.78    | 41.61  | 0.97             | 83.68          | 28.70                                              | 48.84                           | 27.04                      | 21.98                       | 20.58              | 23.06                           | 19.37          | 100.00             | 19.65                                        | 21.18                         | 24.16                 | 63.33              | 49.67                 | 55.04   | 19.93                 | 19.74   | 23.69   | 38.05   | 22.33    | 19.05    |  |
| Score                  | 0.20   | 0.50    | -0.42  | 0.22             | 0.50           | 0.75                                               | 0.50                            | -0.27                      | -0.22                       | -0.21              | -0.23                           | 0.25           | 1.50               | 0.50                                         | 1.50                          | 1.50                  | 1.50               | 1.50                  | 1.50    | -0.20                 | -0.24   | 1.50    | 1.50    | 1.50     | -0.19    |  |
| Ion-type               | PR     | V       |        | LI               | a <sub>2</sub> | NI                                                 | b <sub>2</sub>                  |                            |                             |                    | b <sub>5</sub> -NH <sub>3</sub> | y <sub>4</sub> | b <sup>++</sup> 12 | y <sub>5</sub>                               | y <sub>13</sub> <sup>+2</sup> | y <sub>6</sub>        | y <sup>++</sup> 16 |                       |         |                       |         |         |         |          |          |  |
| Delta ppm              | 15.3   | -16.3   |        | -7.3             | -15.2          | -48.1                                              | -19.1                           |                            |                             |                    |                                 | -6.8           | -3.8               | 28.0                                         |                               |                       |                    |                       |         |                       |         |         |         |          |          |  |

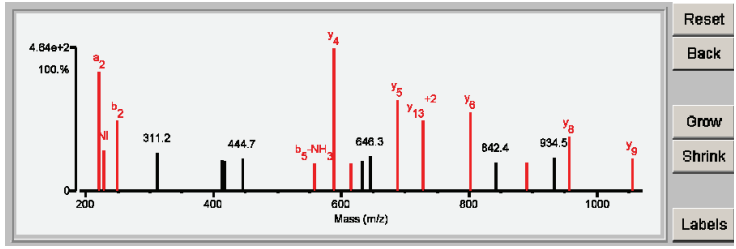

Result Summary

| Rank | Score | SPI (%) | BCS | # Unmatched Ions | # Variable sites | Sequence                                       | MH <sup>+</sup> Calculated (Da) | MH <sup>+</sup> Error (Da) | MH <sup>+</sup> Error (ppm) | Protein MW/pI (Da) | Species | Accession # | Protein Name                                                                     |
|------|-------|---------|-----|------------------|------------------|------------------------------------------------|---------------------------------|----------------------------|-----------------------------|--------------------|---------|-------------|----------------------------------------------------------------------------------|
| 1    | 19.32 | 87.2    | 10  | 4/25             | K707K            | (R)D <sup>+</sup> ELLKDLQ <sup>+</sup> SIAR(E) | 1528.8329                       | 114.0576                   | 8.9                         | 96023.6/6.13       | HUMAN   | Q8WUM4      | Programmed cell death 6-interacting protein OS=Homo sapiens GN=PDCC6IP PE=1 SV=1 |

Detailed Results

| Rank | Score | SPI (%) | BCS | # Unmatched Ions | # Variable sites | Sequence                                                                                                         | MH <sup>+</sup> Calculated (Da) | MH <sup>+</sup> Error (Da) | MH <sup>+</sup> Error (ppm) | Protein MW/pI (Da) | Species | Accession # | MS-Digest Index # | Protein Name                                                                     |
|------|-------|---------|-----|------------------|------------------|------------------------------------------------------------------------------------------------------------------|---------------------------------|----------------------------|-----------------------------|--------------------|---------|-------------|-------------------|----------------------------------------------------------------------------------|
| 1    | 19.32 | 87.2    | 10  | 4/25             | K707K            | (R)D <sup>+</sup> E <sup>+</sup> L <sup>+</sup> L <sup>+</sup> L <sup>+</sup> /k/D/L/Q/Q/S <sup>+</sup> I/A/R(E) | 1528.8329                       | 114.0576                   | 8.9                         | 96023.6/6.13       | HUMAN   | Q8WUM4      | 486463            | Programmed cell death 6-interacting protein OS=Homo sapiens GN=PDCC6IP PE=1 SV=1 |

  

| Fragment-Ion (m/z)     | 84.044 | 84.080 | 86.097 | 88.039         | 101.071 | 102.054 | 175.115        | 181.058 | 199.072 | 217.082        | 245.077        | 246.152        | 342.695 | 358.165        | 446.274        | 556.333                          | 574.331        | 578.314 | 686.830 <sup>+2</sup>        | 643.374 <sup>+2</sup>         | 685.376        | 699.909 <sup>+2</sup>         | 702.391        | 815.473        | 930.502        |
|------------------------|--------|--------|--------|----------------|---------|---------|----------------|---------|---------|----------------|----------------|----------------|---------|----------------|----------------|----------------------------------|----------------|---------|------------------------------|-------------------------------|----------------|-------------------------------|----------------|----------------|----------------|
| Frac. Inten.(% of TIC) | 0.19   | 0.30   | 0.48   | 2.94           | 0.07    | 0.08    | 3.92           | 4.82    | 3.21    | 11.88          | 14.10          | 3.61           | 2.46    | 5.48           | 5.70           | 2.93                             | 8.05           | 2.27    | 4.74                         | 5.61                          | 2.92           | 3.62                          | 2.53           | 2.46           | 5.62           |
| Rel. Inten.(% of BP)   | 1.38   | 2.13   | 3.40   | 20.87          | 0.49    | 0.54    | 27.82          | 34.20   | 22.77   | 84.28          | 100.00         | 25.58          | 17.46   | 38.90          | 40.46          | 20.80                            | 57.12          | 16.09   | 33.65                        | 39.83                         | 20.70          | 25.65                         | 17.97          | 17.47          | 39.87          |
| Score                  | 1.00   | 0.50   | 0.22   | 0.50           |         |         | 1.50           | -0.34   | -0.23   | 0.50           | 0.50           | 1.50           | -0.17   | 0.75           | 1.50           | 0.50                             | 1.50           | -0.16   | 1.50                         | 1.50                          | 0.75           | 1.50                          | 1.50           | 1.50           | 1.50           |
| Ion-type               | E      | KQ     | LI     | a <sub>1</sub> | KQ      | E       | y <sub>1</sub> |         |         | a <sub>2</sub> | b <sub>2</sub> | y <sub>2</sub> |         | b <sub>3</sub> | y <sub>4</sub> | y <sub>5</sub> -H <sub>2</sub> O | y <sub>5</sub> |         | y <sub>5</sub> <sup>+2</sup> | y <sub>10</sub> <sup>+2</sup> | a <sub>5</sub> | y <sub>11</sub> <sup>+2</sup> | y <sub>6</sub> | y <sub>7</sub> | y <sub>8</sub> |
| Delta ppm              | -1.1   | -9.2   | 3.2    | -17.1          |         |         | -23.7          |         |         | -6.4           | -2.9           | -18.1          |         | 8.4            | 3.7            | 22.7                             | 1.0            |         | 11.9                         | 15.0                          | -19.4          | 2.4                           | 2.8            | -0.5           | 1.9            |

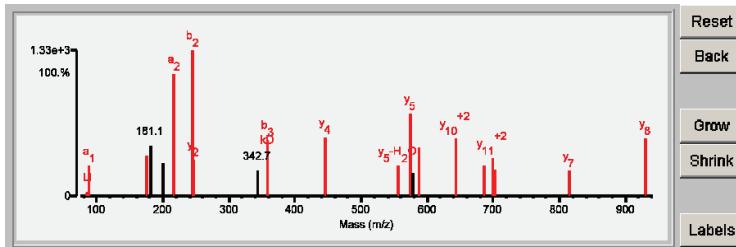

Result Summary

| Rank | Score | SPI (%) | BCS | # Unmatched ions | Variable sites | Sequence                                          | MH <sup>+</sup> Calculated (Da) | MH <sup>+</sup> Error (Da) | MH <sup>+</sup> Error (ppm) | Protein MW/pl (Da) | Species | Accession # | Protein Name                                                         |
|------|-------|---------|-----|------------------|----------------|---------------------------------------------------|---------------------------------|----------------------------|-----------------------------|--------------------|---------|-------------|----------------------------------------------------------------------|
| 1    | 20.68 | 94.4    | 11  | 1/24             | K164k          | (R)DL <sup>S</sup> HGDAVISC <sup>A</sup> KDGVK(F) | 1984.0168                       | 114.0726                   | 14.1                        | 28769.0/4.57       | HUMAN   | P12004      | Proliferating cell nuclear antigen OS=Homo sapiens GN=PCNA PE=1 SV=1 |
| 2    | 15.97 | 80.9    | 9   | 4/24             | K168k          | (R)DL <sup>S</sup> HGDAVISC <sup>A</sup> KDGVK(F) | 1984.0168                       | 114.0726                   | 14.1                        | 28769.0/4.57       | HUMAN   | P12004      | Proliferating cell nuclear antigen OS=Homo sapiens GN=PCNA PE=1 SV=1 |

Detailed Results

| Rank                                                                                                                                                                                                                                                                                                                                                                                                                                                                                                                                                                                                                                                                                                                                                                                                                                                                                                                                                                                                                                                                                                                                                                                                                                                                                                                                                                                                                                                                                                                                                                                                                                                                                                                                                                                                                                                                                                                                                                                                                                                                                                                                                                                                                                                                                                                                                                                                                 | Score  | SPI (%) | BCS    | # Unmatched ions | Variable sites | Sequence                                          | MH <sup>+</sup> Calculated (Da) | MH <sup>+</sup> Error (Da) | MH <sup>+</sup> Error (ppm) | Protein MW/pl (Da) | Species | Accession # | MS-Digest Index # | Protein Name                                                         |                    |         |         |         |         |         |         |         |         |         |         |         |         |         |         |         |         |         |         |         |         |         |         |         |         |                         |      |      |      |      |      |      |      |      |       |      |      |      |      |      |      |      |      |      |      |      |      |      |      |      |                       |       |      |      |      |      |       |       |       |        |       |       |       |       |       |       |       |       |       |       |       |       |       |       |       |       |      |      |      |      |      |      |      |       |      |      |      |      |      |      |      |      |      |      |      |      |      |      |      |      |          |   |    |    |   |     |        |    |  |    |    |     |     |    |      |    |      |      |    |    |    |    |    |    |    |           |      |       |       |       |       |       |      |  |      |      |      |      |     |      |       |       |      |      |     |     |     |      |     |
|----------------------------------------------------------------------------------------------------------------------------------------------------------------------------------------------------------------------------------------------------------------------------------------------------------------------------------------------------------------------------------------------------------------------------------------------------------------------------------------------------------------------------------------------------------------------------------------------------------------------------------------------------------------------------------------------------------------------------------------------------------------------------------------------------------------------------------------------------------------------------------------------------------------------------------------------------------------------------------------------------------------------------------------------------------------------------------------------------------------------------------------------------------------------------------------------------------------------------------------------------------------------------------------------------------------------------------------------------------------------------------------------------------------------------------------------------------------------------------------------------------------------------------------------------------------------------------------------------------------------------------------------------------------------------------------------------------------------------------------------------------------------------------------------------------------------------------------------------------------------------------------------------------------------------------------------------------------------------------------------------------------------------------------------------------------------------------------------------------------------------------------------------------------------------------------------------------------------------------------------------------------------------------------------------------------------------------------------------------------------------------------------------------------------|--------|---------|--------|------------------|----------------|---------------------------------------------------|---------------------------------|----------------------------|-----------------------------|--------------------|---------|-------------|-------------------|----------------------------------------------------------------------|--------------------|---------|---------|---------|---------|---------|---------|---------|---------|---------|---------|---------|---------|---------|---------|---------|---------|---------|---------|---------|---------|---------|---------|---------|---------|-------------------------|------|------|------|------|------|------|------|------|-------|------|------|------|------|------|------|------|------|------|------|------|------|------|------|------|-----------------------|-------|------|------|------|------|-------|-------|-------|--------|-------|-------|-------|-------|-------|-------|-------|-------|-------|-------|-------|-------|-------|-------|-------|-------|------|------|------|------|------|------|------|-------|------|------|------|------|------|------|------|------|------|------|------|------|------|------|------|------|----------|---|----|----|---|-----|--------|----|--|----|----|-----|-----|----|------|----|------|------|----|----|----|----|----|----|----|-----------|------|-------|-------|-------|-------|-------|------|--|------|------|------|------|-----|------|-------|-------|------|------|-----|-----|-----|------|-----|
| 1                                                                                                                                                                                                                                                                                                                                                                                                                                                                                                                                                                                                                                                                                                                                                                                                                                                                                                                                                                                                                                                                                                                                                                                                                                                                                                                                                                                                                                                                                                                                                                                                                                                                                                                                                                                                                                                                                                                                                                                                                                                                                                                                                                                                                                                                                                                                                                                                                    | 20.68  | 94.4    | 11     | 1/24             | K164k          | (R)DL <sup>S</sup> HGDAVISC <sup>A</sup> KDGVK(F) | 1984.0168                       | 114.0726                   | 14.1                        | 28769.0/4.57       | HUMAN   | P12004      | 485421            | Proliferating cell nuclear antigen OS=Homo sapiens GN=PCNA PE=1 SV=1 |                    |         |         |         |         |         |         |         |         |         |         |         |         |         |         |         |         |         |         |         |         |         |         |         |         |                         |      |      |      |      |      |      |      |      |       |      |      |      |      |      |      |      |      |      |      |      |      |      |      |      |                       |       |      |      |      |      |       |       |       |        |       |       |       |       |       |       |       |       |       |       |       |       |       |       |       |       |      |      |      |      |      |      |      |       |      |      |      |      |      |      |      |      |      |      |      |      |      |      |      |      |          |   |    |    |   |     |        |    |  |    |    |     |     |    |      |    |      |      |    |    |    |    |    |    |    |           |      |       |       |       |       |       |      |  |      |      |      |      |     |      |       |       |      |      |     |     |     |      |     |
| <table border="1"> <thead> <tr> <th>Fragment-ion (m/z)</th> <th>72.080</th> <th>84.079</th> <th>86.095</th> <th>110.070</th> <th>129.100</th> <th>130.084</th> <th>147.112</th> <th>185.165</th> <th>201.123</th> <th>225.099</th> <th>303.209</th> <th>338.183</th> <th>425.212</th> <th>446.223</th> <th>453.208</th> <th>489.729</th> <th>546.270</th> <th>660.377</th> <th>731.402</th> <th>738.347</th> <th>809.383</th> <th>891.436</th> <th>908.446</th> <th>978.471</th> </tr> </thead> <tbody> <tr> <td>Frac. Inten. (% of TIC)</td> <td>1.26</td> <td>0.42</td> <td>1.03</td> <td>0.23</td> <td>0.14</td> <td>4.40</td> <td>4.45</td> <td>5.56</td> <td>11.19</td> <td>4.14</td> <td>4.69</td> <td>4.83</td> <td>3.46</td> <td>3.32</td> <td>6.68</td> <td>3.32</td> <td>3.49</td> <td>4.29</td> <td>3.95</td> <td>7.39</td> <td>6.70</td> <td>3.24</td> <td>3.55</td> <td>8.29</td> </tr> <tr> <td>Rel. Inten. (% of BP)</td> <td>11.28</td> <td>3.72</td> <td>9.19</td> <td>2.08</td> <td>1.22</td> <td>39.31</td> <td>39.75</td> <td>49.65</td> <td>100.00</td> <td>36.98</td> <td>41.94</td> <td>43.16</td> <td>30.95</td> <td>29.63</td> <td>59.68</td> <td>29.66</td> <td>31.15</td> <td>38.30</td> <td>35.31</td> <td>66.03</td> <td>59.87</td> <td>28.92</td> <td>31.69</td> <td>74.07</td> </tr> <tr> <td>Score</td> <td>0.50</td> <td>0.50</td> <td>0.22</td> <td>1.00</td> <td>0.20</td> <td>0.50</td> <td>1.50</td> <td>-0.50</td> <td>0.75</td> <td>1.50</td> <td>0.75</td> <td>1.50</td> <td>0.50</td> <td>1.50</td> <td>0.50</td> <td>1.50</td> <td>1.50</td> <td>1.50</td> <td>1.50</td> <td>0.50</td> <td>0.50</td> <td>1.50</td> <td>0.50</td> <td>1.50</td> </tr> <tr> <td>Ion-type</td> <td>V</td> <td>KQ</td> <td>LI</td> <td>H</td> <td>RKQ</td> <td>y1-NH3</td> <td>y1</td> <td></td> <td>a2</td> <td>SH</td> <td>SHI</td> <td>SHI</td> <td>a4</td> <td>y++7</td> <td>b4</td> <td>y++8</td> <td>y++9</td> <td>y5</td> <td>y6</td> <td>b7</td> <td>b8</td> <td>y7</td> <td>b9</td> <td>y8</td> </tr> <tr> <td>Delta ppm</td> <td>-5.2</td> <td>-19.9</td> <td>-11.9</td> <td>-14.3</td> <td>-15.0</td> <td>-17.3</td> <td>-4.1</td> <td></td> <td>-7.3</td> <td>19.2</td> <td>-2.6</td> <td>-9.2</td> <td>4.1</td> <td>-6.0</td> <td>-15.9</td> <td>-16.9</td> <td>14.4</td> <td>-4.1</td> <td>5.4</td> <td>3.5</td> <td>0.9</td> <td>-2.6</td> <td>4.1</td> </tr> </tbody> </table> |        |         |        |                  |                |                                                   |                                 |                            |                             |                    |         |             |                   |                                                                      | Fragment-ion (m/z) | 72.080  | 84.079  | 86.095  | 110.070 | 129.100 | 130.084 | 147.112 | 185.165 | 201.123 | 225.099 | 303.209 | 338.183 | 425.212 | 446.223 | 453.208 | 489.729 | 546.270 | 660.377 | 731.402 | 738.347 | 809.383 | 891.436 | 908.446 | 978.471 | Frac. Inten. (% of TIC) | 1.26 | 0.42 | 1.03 | 0.23 | 0.14 | 4.40 | 4.45 | 5.56 | 11.19 | 4.14 | 4.69 | 4.83 | 3.46 | 3.32 | 6.68 | 3.32 | 3.49 | 4.29 | 3.95 | 7.39 | 6.70 | 3.24 | 3.55 | 8.29 | Rel. Inten. (% of BP) | 11.28 | 3.72 | 9.19 | 2.08 | 1.22 | 39.31 | 39.75 | 49.65 | 100.00 | 36.98 | 41.94 | 43.16 | 30.95 | 29.63 | 59.68 | 29.66 | 31.15 | 38.30 | 35.31 | 66.03 | 59.87 | 28.92 | 31.69 | 74.07 | Score | 0.50 | 0.50 | 0.22 | 1.00 | 0.20 | 0.50 | 1.50 | -0.50 | 0.75 | 1.50 | 0.75 | 1.50 | 0.50 | 1.50 | 0.50 | 1.50 | 1.50 | 1.50 | 1.50 | 0.50 | 0.50 | 1.50 | 0.50 | 1.50 | Ion-type | V | KQ | LI | H | RKQ | y1-NH3 | y1 |  | a2 | SH | SHI | SHI | a4 | y++7 | b4 | y++8 | y++9 | y5 | y6 | b7 | b8 | y7 | b9 | y8 | Delta ppm | -5.2 | -19.9 | -11.9 | -14.3 | -15.0 | -17.3 | -4.1 |  | -7.3 | 19.2 | -2.6 | -9.2 | 4.1 | -6.0 | -15.9 | -16.9 | 14.4 | -4.1 | 5.4 | 3.5 | 0.9 | -2.6 | 4.1 |
| Fragment-ion (m/z)                                                                                                                                                                                                                                                                                                                                                                                                                                                                                                                                                                                                                                                                                                                                                                                                                                                                                                                                                                                                                                                                                                                                                                                                                                                                                                                                                                                                                                                                                                                                                                                                                                                                                                                                                                                                                                                                                                                                                                                                                                                                                                                                                                                                                                                                                                                                                                                                   | 72.080 | 84.079  | 86.095 | 110.070          | 129.100        | 130.084                                           | 147.112                         | 185.165                    | 201.123                     | 225.099            | 303.209 | 338.183     | 425.212           | 446.223                                                              | 453.208            | 489.729 | 546.270 | 660.377 | 731.402 | 738.347 | 809.383 | 891.436 | 908.446 | 978.471 |         |         |         |         |         |         |         |         |         |         |         |         |         |         |         |                         |      |      |      |      |      |      |      |      |       |      |      |      |      |      |      |      |      |      |      |      |      |      |      |      |                       |       |      |      |      |      |       |       |       |        |       |       |       |       |       |       |       |       |       |       |       |       |       |       |       |       |      |      |      |      |      |      |      |       |      |      |      |      |      |      |      |      |      |      |      |      |      |      |      |      |          |   |    |    |   |     |        |    |  |    |    |     |     |    |      |    |      |      |    |    |    |    |    |    |    |           |      |       |       |       |       |       |      |  |      |      |      |      |     |      |       |       |      |      |     |     |     |      |     |
| Frac. Inten. (% of TIC)                                                                                                                                                                                                                                                                                                                                                                                                                                                                                                                                                                                                                                                                                                                                                                                                                                                                                                                                                                                                                                                                                                                                                                                                                                                                                                                                                                                                                                                                                                                                                                                                                                                                                                                                                                                                                                                                                                                                                                                                                                                                                                                                                                                                                                                                                                                                                                                              | 1.26   | 0.42    | 1.03   | 0.23             | 0.14           | 4.40                                              | 4.45                            | 5.56                       | 11.19                       | 4.14               | 4.69    | 4.83        | 3.46              | 3.32                                                                 | 6.68               | 3.32    | 3.49    | 4.29    | 3.95    | 7.39    | 6.70    | 3.24    | 3.55    | 8.29    |         |         |         |         |         |         |         |         |         |         |         |         |         |         |         |                         |      |      |      |      |      |      |      |      |       |      |      |      |      |      |      |      |      |      |      |      |      |      |      |      |                       |       |      |      |      |      |       |       |       |        |       |       |       |       |       |       |       |       |       |       |       |       |       |       |       |       |      |      |      |      |      |      |      |       |      |      |      |      |      |      |      |      |      |      |      |      |      |      |      |      |          |   |    |    |   |     |        |    |  |    |    |     |     |    |      |    |      |      |    |    |    |    |    |    |    |           |      |       |       |       |       |       |      |  |      |      |      |      |     |      |       |       |      |      |     |     |     |      |     |
| Rel. Inten. (% of BP)                                                                                                                                                                                                                                                                                                                                                                                                                                                                                                                                                                                                                                                                                                                                                                                                                                                                                                                                                                                                                                                                                                                                                                                                                                                                                                                                                                                                                                                                                                                                                                                                                                                                                                                                                                                                                                                                                                                                                                                                                                                                                                                                                                                                                                                                                                                                                                                                | 11.28  | 3.72    | 9.19   | 2.08             | 1.22           | 39.31                                             | 39.75                           | 49.65                      | 100.00                      | 36.98              | 41.94   | 43.16       | 30.95             | 29.63                                                                | 59.68              | 29.66   | 31.15   | 38.30   | 35.31   | 66.03   | 59.87   | 28.92   | 31.69   | 74.07   |         |         |         |         |         |         |         |         |         |         |         |         |         |         |         |                         |      |      |      |      |      |      |      |      |       |      |      |      |      |      |      |      |      |      |      |      |      |      |      |      |                       |       |      |      |      |      |       |       |       |        |       |       |       |       |       |       |       |       |       |       |       |       |       |       |       |       |      |      |      |      |      |      |      |       |      |      |      |      |      |      |      |      |      |      |      |      |      |      |      |      |          |   |    |    |   |     |        |    |  |    |    |     |     |    |      |    |      |      |    |    |    |    |    |    |    |           |      |       |       |       |       |       |      |  |      |      |      |      |     |      |       |       |      |      |     |     |     |      |     |
| Score                                                                                                                                                                                                                                                                                                                                                                                                                                                                                                                                                                                                                                                                                                                                                                                                                                                                                                                                                                                                                                                                                                                                                                                                                                                                                                                                                                                                                                                                                                                                                                                                                                                                                                                                                                                                                                                                                                                                                                                                                                                                                                                                                                                                                                                                                                                                                                                                                | 0.50   | 0.50    | 0.22   | 1.00             | 0.20           | 0.50                                              | 1.50                            | -0.50                      | 0.75                        | 1.50               | 0.75    | 1.50        | 0.50              | 1.50                                                                 | 0.50               | 1.50    | 1.50    | 1.50    | 1.50    | 0.50    | 0.50    | 1.50    | 0.50    | 1.50    |         |         |         |         |         |         |         |         |         |         |         |         |         |         |         |                         |      |      |      |      |      |      |      |      |       |      |      |      |      |      |      |      |      |      |      |      |      |      |      |      |                       |       |      |      |      |      |       |       |       |        |       |       |       |       |       |       |       |       |       |       |       |       |       |       |       |       |      |      |      |      |      |      |      |       |      |      |      |      |      |      |      |      |      |      |      |      |      |      |      |      |          |   |    |    |   |     |        |    |  |    |    |     |     |    |      |    |      |      |    |    |    |    |    |    |    |           |      |       |       |       |       |       |      |  |      |      |      |      |     |      |       |       |      |      |     |     |     |      |     |
| Ion-type                                                                                                                                                                                                                                                                                                                                                                                                                                                                                                                                                                                                                                                                                                                                                                                                                                                                                                                                                                                                                                                                                                                                                                                                                                                                                                                                                                                                                                                                                                                                                                                                                                                                                                                                                                                                                                                                                                                                                                                                                                                                                                                                                                                                                                                                                                                                                                                                             | V      | KQ      | LI     | H                | RKQ            | y1-NH3                                            | y1                              |                            | a2                          | SH                 | SHI     | SHI         | a4                | y++7                                                                 | b4                 | y++8    | y++9    | y5      | y6      | b7      | b8      | y7      | b9      | y8      |         |         |         |         |         |         |         |         |         |         |         |         |         |         |         |                         |      |      |      |      |      |      |      |      |       |      |      |      |      |      |      |      |      |      |      |      |      |      |      |      |                       |       |      |      |      |      |       |       |       |        |       |       |       |       |       |       |       |       |       |       |       |       |       |       |       |       |      |      |      |      |      |      |      |       |      |      |      |      |      |      |      |      |      |      |      |      |      |      |      |      |          |   |    |    |   |     |        |    |  |    |    |     |     |    |      |    |      |      |    |    |    |    |    |    |    |           |      |       |       |       |       |       |      |  |      |      |      |      |     |      |       |       |      |      |     |     |     |      |     |
| Delta ppm                                                                                                                                                                                                                                                                                                                                                                                                                                                                                                                                                                                                                                                                                                                                                                                                                                                                                                                                                                                                                                                                                                                                                                                                                                                                                                                                                                                                                                                                                                                                                                                                                                                                                                                                                                                                                                                                                                                                                                                                                                                                                                                                                                                                                                                                                                                                                                                                            | -5.2   | -19.9   | -11.9  | -14.3            | -15.0          | -17.3                                             | -4.1                            |                            | -7.3                        | 19.2               | -2.6    | -9.2        | 4.1               | -6.0                                                                 | -15.9              | -16.9   | 14.4    | -4.1    | 5.4     | 3.5     | 0.9     | -2.6    | 4.1     |         |         |         |         |         |         |         |         |         |         |         |         |         |         |         |         |                         |      |      |      |      |      |      |      |      |       |      |      |      |      |      |      |      |      |      |      |      |      |      |      |      |                       |       |      |      |      |      |       |       |       |        |       |       |       |       |       |       |       |       |       |       |       |       |       |       |       |       |      |      |      |      |      |      |      |       |      |      |      |      |      |      |      |      |      |      |      |      |      |      |      |      |          |   |    |    |   |     |        |    |  |    |    |     |     |    |      |    |      |      |    |    |    |    |    |    |    |           |      |       |       |       |       |       |      |  |      |      |      |      |     |      |       |       |      |      |     |     |     |      |     |

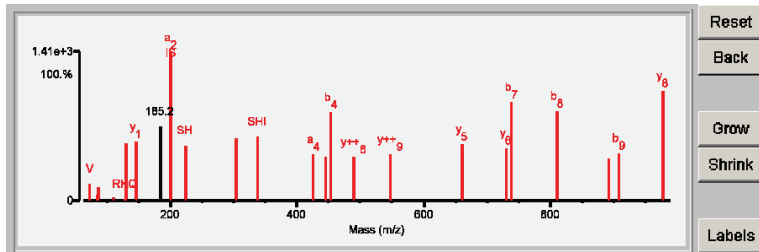

Result Summary

| Rank | Score | SPI (%) | BCS | # Unmatched Ions | Variable sites | Sequence            | MH <sup>+</sup> Calculated (Da) | MH <sup>+</sup> Error (Da) | MH <sup>+</sup> Error (ppm) | Protein MW/Pl (Da) | Species | Accession # | Protein Name                                                         |
|------|-------|---------|-----|------------------|----------------|---------------------|---------------------------------|----------------------------|-----------------------------|--------------------|---------|-------------|----------------------------------------------------------------------|
| 1    | 12.36 | 79.8    | 5   | 9/25             | K254k          | (K)YYLAPKIEDEEGS(-) | 1513.7057                       | 114.0508                   | 4.9                         | 28769.0/4.57       | HUMAN   | P12004      | Proliferating cell nuclear antigen OS=Homo sapiens GN=PCNA PE=1 SV=1 |

Detailed Results

| Rank                                                                                                                                                                                                                                                                                                                                                                                                                                                                                                                                                                                                                                                                                                                                                                                                                                                                                                                                                                                                                                                                                                                                                                                                                                                                                                                                                                                                                                                                                                                                                                                                                                                                                                                                                                                                                                                                                                                                                                                                                                                                                                                                                                                                                                                                                                                                                                                                                                                                               | Score  | SPI (%) | BCS     | # Unmatched Ions | Variable sites | Sequence                           | MH <sup>+</sup> Calculated (Da) | MH <sup>+</sup> Error (Da) | MH <sup>+</sup> Error (ppm) | Protein MW/Pl (Da) | Species | Accession # | MS-Digest Index # | Protein Name                                                         |                    |         |         |         |         |          |          |          |          |                       |          |         |         |         |         |         |         |         |         |         |          |          |          |          |          |          |                        |      |      |      |      |      |       |      |       |      |      |      |       |      |      |      |      |      |      |      |      |      |      |       |      |      |                      |      |      |      |      |      |       |       |       |       |      |      |       |      |       |       |      |       |      |       |      |      |       |        |       |       |       |       |      |      |      |      |      |       |      |       |      |      |      |       |      |      |       |       |       |       |       |       |      |      |      |      |          |  |    |    |    |    |    |  |    |  |    |     |    |  |    |    |  |  |    |  |  |  |        |    |     |     |           |  |      |      |      |      |      |  |      |  |     |      |      |  |     |     |  |  |       |  |  |  |     |     |     |     |
|------------------------------------------------------------------------------------------------------------------------------------------------------------------------------------------------------------------------------------------------------------------------------------------------------------------------------------------------------------------------------------------------------------------------------------------------------------------------------------------------------------------------------------------------------------------------------------------------------------------------------------------------------------------------------------------------------------------------------------------------------------------------------------------------------------------------------------------------------------------------------------------------------------------------------------------------------------------------------------------------------------------------------------------------------------------------------------------------------------------------------------------------------------------------------------------------------------------------------------------------------------------------------------------------------------------------------------------------------------------------------------------------------------------------------------------------------------------------------------------------------------------------------------------------------------------------------------------------------------------------------------------------------------------------------------------------------------------------------------------------------------------------------------------------------------------------------------------------------------------------------------------------------------------------------------------------------------------------------------------------------------------------------------------------------------------------------------------------------------------------------------------------------------------------------------------------------------------------------------------------------------------------------------------------------------------------------------------------------------------------------------------------------------------------------------------------------------------------------------|--------|---------|---------|------------------|----------------|------------------------------------|---------------------------------|----------------------------|-----------------------------|--------------------|---------|-------------|-------------------|----------------------------------------------------------------------|--------------------|---------|---------|---------|---------|----------|----------|----------|----------|-----------------------|----------|---------|---------|---------|---------|---------|---------|---------|---------|---------|----------|----------|----------|----------|----------|----------|------------------------|------|------|------|------|------|-------|------|-------|------|------|------|-------|------|------|------|------|------|------|------|------|------|------|-------|------|------|----------------------|------|------|------|------|------|-------|-------|-------|-------|------|------|-------|------|-------|-------|------|-------|------|-------|------|------|-------|--------|-------|-------|-------|-------|------|------|------|------|------|-------|------|-------|------|------|------|-------|------|------|-------|-------|-------|-------|-------|-------|------|------|------|------|----------|--|----|----|----|----|----|--|----|--|----|-----|----|--|----|----|--|--|----|--|--|--|--------|----|-----|-----|-----------|--|------|------|------|------|------|--|------|--|-----|------|------|--|-----|-----|--|--|-------|--|--|--|-----|-----|-----|-----|
| 1                                                                                                                                                                                                                                                                                                                                                                                                                                                                                                                                                                                                                                                                                                                                                                                                                                                                                                                                                                                                                                                                                                                                                                                                                                                                                                                                                                                                                                                                                                                                                                                                                                                                                                                                                                                                                                                                                                                                                                                                                                                                                                                                                                                                                                                                                                                                                                                                                                                                                  | 12.36  | 79.8    | 5       | 9/25             | K254k          | (K)Y Y L I A P K I E D E E G S (-) | 1513.7057                       | 114.0508                   | 4.9                         | 28769.0/4.57       | HUMAN   | P12004      | 242711            | Proliferating cell nuclear antigen OS=Homo sapiens GN=PCNA PE=1 SV=1 |                    |         |         |         |         |          |          |          |          |                       |          |         |         |         |         |         |         |         |         |         |          |          |          |          |          |          |                        |      |      |      |      |      |       |      |       |      |      |      |       |      |      |      |      |      |      |      |      |      |      |       |      |      |                      |      |      |      |      |      |       |       |       |       |      |      |       |      |       |       |      |       |      |       |      |      |       |        |       |       |       |       |      |      |      |      |      |       |      |       |      |      |      |       |      |      |       |       |       |       |       |       |      |      |      |      |          |  |    |    |    |    |    |  |    |  |    |     |    |  |    |    |  |  |    |  |  |  |        |    |     |     |           |  |      |      |      |      |      |  |      |  |     |      |      |  |     |     |  |  |       |  |  |  |     |     |     |     |
| <table border="1"> <thead> <tr> <th>Fragment-ion (m/z)</th> <th>84.083</th> <th>86.096</th> <th>106.053</th> <th>136.076</th> <th>185.131</th> <th>299.138</th> <th>300.142</th> <th>327.132</th> <th>328.134<sup>12</sup></th> <th>340.200</th> <th>348.192</th> <th>440.218</th> <th>466.237</th> <th>483.262</th> <th>511.258</th> <th>652.296</th> <th>826.400</th> <th>850.416</th> <th>955.443</th> <th>1012.460</th> <th>1026.485</th> <th>1099.496</th> <th>1117.504</th> <th>1188.546</th> <th>1301.629</th> </tr> </thead> <tbody> <tr> <td>Frac. Inten.(% of TIC)</td> <td>1.47</td> <td>0.05</td> <td>1.37</td> <td>0.22</td> <td>1.30</td> <td>12.59</td> <td>3.14</td> <td>11.56</td> <td>5.01</td> <td>1.18</td> <td>1.74</td> <td>12.60</td> <td>1.76</td> <td>1.89</td> <td>5.95</td> <td>1.70</td> <td>2.35</td> <td>1.27</td> <td>2.24</td> <td>1.17</td> <td>1.38</td> <td>2.04</td> <td>18.21</td> <td>5.08</td> <td>2.65</td> </tr> <tr> <td>Rel. Inten.(% of BP)</td> <td>8.06</td> <td>0.30</td> <td>7.53</td> <td>1.22</td> <td>7.14</td> <td>69.18</td> <td>17.27</td> <td>63.50</td> <td>27.51</td> <td>6.47</td> <td>9.55</td> <td>69.19</td> <td>9.64</td> <td>10.95</td> <td>32.67</td> <td>9.31</td> <td>12.89</td> <td>6.95</td> <td>12.33</td> <td>6.42</td> <td>7.56</td> <td>11.22</td> <td>100.00</td> <td>27.88</td> <td>14.55</td> </tr> <tr> <td>Score</td> <td>-0.08</td> <td>0.22</td> <td>1.50</td> <td>1.00</td> <td>0.75</td> <td>0.50</td> <td>-0.17</td> <td>0.50</td> <td>-0.28</td> <td>0.75</td> <td>0.75</td> <td>0.50</td> <td>-0.10</td> <td>0.50</td> <td>0.50</td> <td>-0.09</td> <td>-0.13</td> <td>-0.12</td> <td>-0.12</td> <td>-0.06</td> <td>-0.08</td> <td>0.50</td> <td>1.50</td> <td>1.50</td> <td>1.50</td> </tr> <tr> <td>Ion-type</td> <td></td> <td>LI</td> <td>Y1</td> <td>#1</td> <td>LA</td> <td>#2</td> <td></td> <td>b2</td> <td></td> <td>Pk</td> <td>YLA</td> <td>b3</td> <td></td> <td>a4</td> <td>b4</td> <td></td> <td></td> <td>b6</td> <td></td> <td></td> <td></td> <td>y9-H2O</td> <td>y9</td> <td>y10</td> <td>y11</td> </tr> <tr> <td>Delta ppm</td> <td></td> <td>-2.6</td> <td>31.4</td> <td>-7.3</td> <td>10.0</td> <td>-6.4</td> <td></td> <td>-8.0</td> <td></td> <td>2.9</td> <td>-3.1</td> <td>-1.8</td> <td></td> <td>2.1</td> <td>3.9</td> <td></td> <td></td> <td>-36.4</td> <td></td> <td></td> <td></td> <td>5.4</td> <td>3.0</td> <td>6.7</td> <td>5.4</td> </tr> </tbody> </table> |        |         |         |                  |                |                                    |                                 |                            |                             |                    |         |             |                   |                                                                      | Fragment-ion (m/z) | 84.083  | 86.096  | 106.053 | 136.076 | 185.131  | 299.138  | 300.142  | 327.132  | 328.134 <sup>12</sup> | 340.200  | 348.192 | 440.218 | 466.237 | 483.262 | 511.258 | 652.296 | 826.400 | 850.416 | 955.443 | 1012.460 | 1026.485 | 1099.496 | 1117.504 | 1188.546 | 1301.629 | Frac. Inten.(% of TIC) | 1.47 | 0.05 | 1.37 | 0.22 | 1.30 | 12.59 | 3.14 | 11.56 | 5.01 | 1.18 | 1.74 | 12.60 | 1.76 | 1.89 | 5.95 | 1.70 | 2.35 | 1.27 | 2.24 | 1.17 | 1.38 | 2.04 | 18.21 | 5.08 | 2.65 | Rel. Inten.(% of BP) | 8.06 | 0.30 | 7.53 | 1.22 | 7.14 | 69.18 | 17.27 | 63.50 | 27.51 | 6.47 | 9.55 | 69.19 | 9.64 | 10.95 | 32.67 | 9.31 | 12.89 | 6.95 | 12.33 | 6.42 | 7.56 | 11.22 | 100.00 | 27.88 | 14.55 | Score | -0.08 | 0.22 | 1.50 | 1.00 | 0.75 | 0.50 | -0.17 | 0.50 | -0.28 | 0.75 | 0.75 | 0.50 | -0.10 | 0.50 | 0.50 | -0.09 | -0.13 | -0.12 | -0.12 | -0.06 | -0.08 | 0.50 | 1.50 | 1.50 | 1.50 | Ion-type |  | LI | Y1 | #1 | LA | #2 |  | b2 |  | Pk | YLA | b3 |  | a4 | b4 |  |  | b6 |  |  |  | y9-H2O | y9 | y10 | y11 | Delta ppm |  | -2.6 | 31.4 | -7.3 | 10.0 | -6.4 |  | -8.0 |  | 2.9 | -3.1 | -1.8 |  | 2.1 | 3.9 |  |  | -36.4 |  |  |  | 5.4 | 3.0 | 6.7 | 5.4 |
| Fragment-ion (m/z)                                                                                                                                                                                                                                                                                                                                                                                                                                                                                                                                                                                                                                                                                                                                                                                                                                                                                                                                                                                                                                                                                                                                                                                                                                                                                                                                                                                                                                                                                                                                                                                                                                                                                                                                                                                                                                                                                                                                                                                                                                                                                                                                                                                                                                                                                                                                                                                                                                                                 | 84.083 | 86.096  | 106.053 | 136.076          | 185.131        | 299.138                            | 300.142                         | 327.132                    | 328.134 <sup>12</sup>       | 340.200            | 348.192 | 440.218     | 466.237           | 483.262                                                              | 511.258            | 652.296 | 826.400 | 850.416 | 955.443 | 1012.460 | 1026.485 | 1099.496 | 1117.504 | 1188.546              | 1301.629 |         |         |         |         |         |         |         |         |         |          |          |          |          |          |          |                        |      |      |      |      |      |       |      |       |      |      |      |       |      |      |      |      |      |      |      |      |      |      |       |      |      |                      |      |      |      |      |      |       |       |       |       |      |      |       |      |       |       |      |       |      |       |      |      |       |        |       |       |       |       |      |      |      |      |      |       |      |       |      |      |      |       |      |      |       |       |       |       |       |       |      |      |      |      |          |  |    |    |    |    |    |  |    |  |    |     |    |  |    |    |  |  |    |  |  |  |        |    |     |     |           |  |      |      |      |      |      |  |      |  |     |      |      |  |     |     |  |  |       |  |  |  |     |     |     |     |
| Frac. Inten.(% of TIC)                                                                                                                                                                                                                                                                                                                                                                                                                                                                                                                                                                                                                                                                                                                                                                                                                                                                                                                                                                                                                                                                                                                                                                                                                                                                                                                                                                                                                                                                                                                                                                                                                                                                                                                                                                                                                                                                                                                                                                                                                                                                                                                                                                                                                                                                                                                                                                                                                                                             | 1.47   | 0.05    | 1.37    | 0.22             | 1.30           | 12.59                              | 3.14                            | 11.56                      | 5.01                        | 1.18               | 1.74    | 12.60       | 1.76              | 1.89                                                                 | 5.95               | 1.70    | 2.35    | 1.27    | 2.24    | 1.17     | 1.38     | 2.04     | 18.21    | 5.08                  | 2.65     |         |         |         |         |         |         |         |         |         |          |          |          |          |          |          |                        |      |      |      |      |      |       |      |       |      |      |      |       |      |      |      |      |      |      |      |      |      |      |       |      |      |                      |      |      |      |      |      |       |       |       |       |      |      |       |      |       |       |      |       |      |       |      |      |       |        |       |       |       |       |      |      |      |      |      |       |      |       |      |      |      |       |      |      |       |       |       |       |       |       |      |      |      |      |          |  |    |    |    |    |    |  |    |  |    |     |    |  |    |    |  |  |    |  |  |  |        |    |     |     |           |  |      |      |      |      |      |  |      |  |     |      |      |  |     |     |  |  |       |  |  |  |     |     |     |     |
| Rel. Inten.(% of BP)                                                                                                                                                                                                                                                                                                                                                                                                                                                                                                                                                                                                                                                                                                                                                                                                                                                                                                                                                                                                                                                                                                                                                                                                                                                                                                                                                                                                                                                                                                                                                                                                                                                                                                                                                                                                                                                                                                                                                                                                                                                                                                                                                                                                                                                                                                                                                                                                                                                               | 8.06   | 0.30    | 7.53    | 1.22             | 7.14           | 69.18                              | 17.27                           | 63.50                      | 27.51                       | 6.47               | 9.55    | 69.19       | 9.64              | 10.95                                                                | 32.67              | 9.31    | 12.89   | 6.95    | 12.33   | 6.42     | 7.56     | 11.22    | 100.00   | 27.88                 | 14.55    |         |         |         |         |         |         |         |         |         |          |          |          |          |          |          |                        |      |      |      |      |      |       |      |       |      |      |      |       |      |      |      |      |      |      |      |      |      |      |       |      |      |                      |      |      |      |      |      |       |       |       |       |      |      |       |      |       |       |      |       |      |       |      |      |       |        |       |       |       |       |      |      |      |      |      |       |      |       |      |      |      |       |      |      |       |       |       |       |       |       |      |      |      |      |          |  |    |    |    |    |    |  |    |  |    |     |    |  |    |    |  |  |    |  |  |  |        |    |     |     |           |  |      |      |      |      |      |  |      |  |     |      |      |  |     |     |  |  |       |  |  |  |     |     |     |     |
| Score                                                                                                                                                                                                                                                                                                                                                                                                                                                                                                                                                                                                                                                                                                                                                                                                                                                                                                                                                                                                                                                                                                                                                                                                                                                                                                                                                                                                                                                                                                                                                                                                                                                                                                                                                                                                                                                                                                                                                                                                                                                                                                                                                                                                                                                                                                                                                                                                                                                                              | -0.08  | 0.22    | 1.50    | 1.00             | 0.75           | 0.50                               | -0.17                           | 0.50                       | -0.28                       | 0.75               | 0.75    | 0.50        | -0.10             | 0.50                                                                 | 0.50               | -0.09   | -0.13   | -0.12   | -0.12   | -0.06    | -0.08    | 0.50     | 1.50     | 1.50                  | 1.50     |         |         |         |         |         |         |         |         |         |          |          |          |          |          |          |                        |      |      |      |      |      |       |      |       |      |      |      |       |      |      |      |      |      |      |      |      |      |      |       |      |      |                      |      |      |      |      |      |       |       |       |       |      |      |       |      |       |       |      |       |      |       |      |      |       |        |       |       |       |       |      |      |      |      |      |       |      |       |      |      |      |       |      |      |       |       |       |       |       |       |      |      |      |      |          |  |    |    |    |    |    |  |    |  |    |     |    |  |    |    |  |  |    |  |  |  |        |    |     |     |           |  |      |      |      |      |      |  |      |  |     |      |      |  |     |     |  |  |       |  |  |  |     |     |     |     |
| Ion-type                                                                                                                                                                                                                                                                                                                                                                                                                                                                                                                                                                                                                                                                                                                                                                                                                                                                                                                                                                                                                                                                                                                                                                                                                                                                                                                                                                                                                                                                                                                                                                                                                                                                                                                                                                                                                                                                                                                                                                                                                                                                                                                                                                                                                                                                                                                                                                                                                                                                           |        | LI      | Y1      | #1               | LA             | #2                                 |                                 | b2                         |                             | Pk                 | YLA     | b3          |                   | a4                                                                   | b4                 |         |         | b6      |         |          |          | y9-H2O   | y9       | y10                   | y11      |         |         |         |         |         |         |         |         |         |          |          |          |          |          |          |                        |      |      |      |      |      |       |      |       |      |      |      |       |      |      |      |      |      |      |      |      |      |      |       |      |      |                      |      |      |      |      |      |       |       |       |       |      |      |       |      |       |       |      |       |      |       |      |      |       |        |       |       |       |       |      |      |      |      |      |       |      |       |      |      |      |       |      |      |       |       |       |       |       |       |      |      |      |      |          |  |    |    |    |    |    |  |    |  |    |     |    |  |    |    |  |  |    |  |  |  |        |    |     |     |           |  |      |      |      |      |      |  |      |  |     |      |      |  |     |     |  |  |       |  |  |  |     |     |     |     |
| Delta ppm                                                                                                                                                                                                                                                                                                                                                                                                                                                                                                                                                                                                                                                                                                                                                                                                                                                                                                                                                                                                                                                                                                                                                                                                                                                                                                                                                                                                                                                                                                                                                                                                                                                                                                                                                                                                                                                                                                                                                                                                                                                                                                                                                                                                                                                                                                                                                                                                                                                                          |        | -2.6    | 31.4    | -7.3             | 10.0           | -6.4                               |                                 | -8.0                       |                             | 2.9                | -3.1    | -1.8        |                   | 2.1                                                                  | 3.9                |         |         | -36.4   |         |          |          | 5.4      | 3.0      | 6.7                   | 5.4      |         |         |         |         |         |         |         |         |         |          |          |          |          |          |          |                        |      |      |      |      |      |       |      |       |      |      |      |       |      |      |      |      |      |      |      |      |      |      |       |      |      |                      |      |      |      |      |      |       |       |       |       |      |      |       |      |       |       |      |       |      |       |      |      |       |        |       |       |       |       |      |      |      |      |      |       |      |       |      |      |      |       |      |      |       |       |       |       |       |       |      |      |      |      |          |  |    |    |    |    |    |  |    |  |    |     |    |  |    |    |  |  |    |  |  |  |        |    |     |     |           |  |      |      |      |      |      |  |      |  |     |      |      |  |     |     |  |  |       |  |  |  |     |     |     |     |

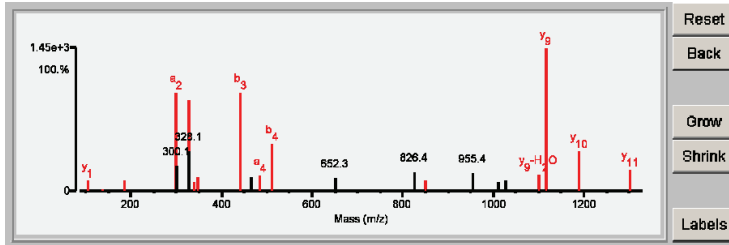



Result Summary

| Rank | Score | SPI (%) | BCS | # Unmatched Ions | Variable sites | Sequence          | MH <sup>+</sup> Calculated (Da) | MH <sup>+</sup> Error (Da) | MH <sup>+</sup> Error (ppm) | Protein MW/pI (Da) | Species | Accession # | Protein Name                                                               |
|------|-------|---------|-----|------------------|----------------|-------------------|---------------------------------|----------------------------|-----------------------------|--------------------|---------|-------------|----------------------------------------------------------------------------|
| 1    | 10.97 | 60.6    | 7   | 10/25            | K21k           | (R)GASNKYLVEFR(A) | 1283.6743                       | 114.0479                   | 3.5                         | 42153.5/4.96       | HUMAN   | Q16186      | Proteasomal ubiquitin receptor ADRM1 OS=Homo sapiens GN=ADRM1 PE=1 SV=2    |
| 2    | 6.85  | 51.5    | 4   | 12/25            | None           | (K)QRYRMIDFLR(F)  | 1397.7470                       | -0.0249                    | -17.8                       | 33301.0/11.29      | HUMAN   | Q5T653      | 39S ribosomal protein L2, mitochondrial OS=Homo sapiens GN=MRPL2 PE=1 SV=2 |

Detailed Results

| Rank                                                                                                                                                                                                                                                                                                                                                                                                                                                                                                                                                                                                                                                                                                                                                                                                                                                                                                                                                                                                                                                                                                                                                                                                                                                                                                                                                                                                                                                                                                                                                                                                                                                                                                                                                                                                                                                                                                                                                                                                                                                                                                                                                                                                                                                                                                                                                                                                                                                                                                                                                                                                                                                                                                                                                              | Score  | SPI (%) | BCS    | # Unmatched Ions | Variable sites | Sequence          | MH <sup>+</sup> Calculated (Da) | MH <sup>+</sup> Error (Da) | MH <sup>+</sup> Error (ppm) | Protein MW/pI (Da) | Species | Accession # | MS-Digest Index # | Protein Name                                                            |                    |         |                      |         |         |         |         |         |         |         |         |         |         |         |         |         |         |                      |         |         |         |         |         |         |         |         |                        |      |      |      |       |      |      |      |      |      |      |      |      |      |      |       |      |      |      |      |      |      |       |      |      |      |                      |       |      |      |       |      |       |       |      |       |      |       |       |       |       |       |       |       |       |       |       |       |        |       |       |       |       |       |      |      |       |      |      |       |      |      |      |      |      |       |       |      |       |       |       |       |      |       |      |      |      |      |          |    |   |  |  |    |    |   |  |    |   |        |    |  |    |  |  |  |  |  |    |    |    |    |    |    |           |  |     |      |  |      |       |  |      |  |       |      |       |      |  |       |  |  |  |  |     |      |      |     |      |      |  |  |  |  |  |  |  |  |  |  |     |  |  |  |  |  |  |  |  |  |  |  |  |  |  |  |
|-------------------------------------------------------------------------------------------------------------------------------------------------------------------------------------------------------------------------------------------------------------------------------------------------------------------------------------------------------------------------------------------------------------------------------------------------------------------------------------------------------------------------------------------------------------------------------------------------------------------------------------------------------------------------------------------------------------------------------------------------------------------------------------------------------------------------------------------------------------------------------------------------------------------------------------------------------------------------------------------------------------------------------------------------------------------------------------------------------------------------------------------------------------------------------------------------------------------------------------------------------------------------------------------------------------------------------------------------------------------------------------------------------------------------------------------------------------------------------------------------------------------------------------------------------------------------------------------------------------------------------------------------------------------------------------------------------------------------------------------------------------------------------------------------------------------------------------------------------------------------------------------------------------------------------------------------------------------------------------------------------------------------------------------------------------------------------------------------------------------------------------------------------------------------------------------------------------------------------------------------------------------------------------------------------------------------------------------------------------------------------------------------------------------------------------------------------------------------------------------------------------------------------------------------------------------------------------------------------------------------------------------------------------------------------------------------------------------------------------------------------------------|--------|---------|--------|------------------|----------------|-------------------|---------------------------------|----------------------------|-----------------------------|--------------------|---------|-------------|-------------------|-------------------------------------------------------------------------|--------------------|---------|----------------------|---------|---------|---------|---------|---------|---------|---------|---------|---------|---------|---------|---------|---------|---------|----------------------|---------|---------|---------|---------|---------|---------|---------|---------|------------------------|------|------|------|-------|------|------|------|------|------|------|------|------|------|------|-------|------|------|------|------|------|------|-------|------|------|------|----------------------|-------|------|------|-------|------|-------|-------|------|-------|------|-------|-------|-------|-------|-------|-------|-------|-------|-------|-------|-------|--------|-------|-------|-------|-------|-------|------|------|-------|------|------|-------|------|------|------|------|------|-------|-------|------|-------|-------|-------|-------|------|-------|------|------|------|------|----------|----|---|--|--|----|----|---|--|----|---|--------|----|--|----|--|--|--|--|--|----|----|----|----|----|----|-----------|--|-----|------|--|------|-------|--|------|--|-------|------|-------|------|--|-------|--|--|--|--|-----|------|------|-----|------|------|--|--|--|--|--|--|--|--|--|--|-----|--|--|--|--|--|--|--|--|--|--|--|--|--|--|--|
| 1                                                                                                                                                                                                                                                                                                                                                                                                                                                                                                                                                                                                                                                                                                                                                                                                                                                                                                                                                                                                                                                                                                                                                                                                                                                                                                                                                                                                                                                                                                                                                                                                                                                                                                                                                                                                                                                                                                                                                                                                                                                                                                                                                                                                                                                                                                                                                                                                                                                                                                                                                                                                                                                                                                                                                                 | 10.97  | 60.6    | 7      | 10/25            | K21k           | (R)GASNKYLVEFR(A) | 1283.6743                       | 114.0479                   | 3.5                         | 42153.5/4.96       | HUMAN   | Q16186      | 7886              | Proteasomal ubiquitin receptor ADRM1 OS=Homo sapiens GN=ADRM1 PE=1 SV=2 |                    |         |                      |         |         |         |         |         |         |         |         |         |         |         |         |         |         |                      |         |         |         |         |         |         |         |         |                        |      |      |      |       |      |      |      |      |      |      |      |      |      |      |       |      |      |      |      |      |      |       |      |      |      |                      |       |      |      |       |      |       |       |      |       |      |       |       |       |       |       |       |       |       |       |       |       |        |       |       |       |       |       |      |      |       |      |      |       |      |      |      |      |      |       |       |      |       |       |       |       |      |       |      |      |      |      |          |    |   |  |  |    |    |   |  |    |   |        |    |  |    |  |  |  |  |  |    |    |    |    |    |    |           |  |     |      |  |      |       |  |      |  |       |      |       |      |  |       |  |  |  |  |     |      |      |     |      |      |  |  |  |  |  |  |  |  |  |  |     |  |  |  |  |  |  |  |  |  |  |  |  |  |  |  |
| <table border="1"> <thead> <tr> <th>Fragment-ion (m/z)</th> <th>60.054</th> <th>70.066</th> <th>72.083</th> <th>84.080</th> <th>86.098</th> <th>101.069</th> <th>110.070</th> <th>120.083</th> <th>129.062</th> <th>136.075</th> <th>158.090</th> <th>175.118</th> <th>190.097</th> <th>222.141</th> <th>322.184</th> <th>337.642</th> <th>345.178<sup>+</sup></th> <th>352.175</th> <th>422.233</th> <th>451.231</th> <th>531.295</th> <th>550.297</th> <th>663.380</th> <th>735.348</th> <th>826.457</th> </tr> </thead> <tbody> <tr> <td>Frac. Inten.(% of TIC)</td> <td>2.07</td> <td>0.00</td> <td>0.11</td> <td>12.51</td> <td>0.46</td> <td>6.12</td> <td>6.67</td> <td>0.10</td> <td>2.95</td> <td>0.22</td> <td>3.09</td> <td>3.19</td> <td>3.50</td> <td>2.48</td> <td>11.62</td> <td>2.04</td> <td>2.22</td> <td>2.62</td> <td>3.19</td> <td>9.52</td> <td>2.15</td> <td>13.35</td> <td>5.66</td> <td>2.06</td> <td>2.11</td> </tr> <tr> <td>Rel. Inten.(% of BP)</td> <td>15.48</td> <td>0.02</td> <td>0.83</td> <td>93.73</td> <td>3.45</td> <td>45.81</td> <td>49.92</td> <td>0.78</td> <td>22.08</td> <td>1.61</td> <td>23.15</td> <td>23.91</td> <td>26.20</td> <td>18.59</td> <td>87.04</td> <td>15.28</td> <td>16.59</td> <td>19.60</td> <td>23.92</td> <td>71.27</td> <td>16.13</td> <td>100.00</td> <td>42.36</td> <td>15.41</td> <td>15.81</td> </tr> <tr> <td>Score</td> <td>-0.15</td> <td>0.20</td> <td>0.50</td> <td>-0.94</td> <td>0.22</td> <td>0.50</td> <td>-0.50</td> <td>1.00</td> <td>1.00</td> <td>1.00</td> <td>0.50</td> <td>1.50</td> <td>-0.26</td> <td>-0.19</td> <td>1.50</td> <td>-0.15</td> <td>-0.17</td> <td>-0.20</td> <td>-0.24</td> <td>1.50</td> <td>-0.16</td> <td>1.50</td> <td>0.50</td> <td>1.50</td> <td>1.50</td> </tr> <tr> <td>Ion-type</td> <td>PR</td> <td>V</td> <td></td> <td></td> <td>LI</td> <td>ac</td> <td>F</td> <td></td> <td>b2</td> <td>Y</td> <td>y1-NH3</td> <td>y1</td> <td></td> <td>y2</td> <td></td> <td></td> <td></td> <td></td> <td></td> <td>y3</td> <td>y4</td> <td>y5</td> <td>b6</td> <td>y6</td> <td>y6</td> </tr> <tr> <td>Delta ppm</td> <td></td> <td>6.8</td> <td>29.5</td> <td></td> <td>13.6</td> <td>-22.2</td> <td></td> <td>16.9</td> <td></td> <td>-29.1</td> <td>-4.3</td> <td>-17.1</td> <td>-4.9</td> <td></td> <td>-11.7</td> <td></td> <td></td> <td></td> <td></td> <td>2.1</td> <td>-2.7</td> <td>-3.5</td> <td>8.0</td> <td>13.4</td> <td>13.4</td> </tr> <tr> <td></td> <td>QKR</td> <td></td> </tr> </tbody> </table> |        |         |        |                  |                |                   |                                 |                            |                             |                    |         |             |                   |                                                                         | Fragment-ion (m/z) | 60.054  | 70.066               | 72.083  | 84.080  | 86.098  | 101.069 | 110.070 | 120.083 | 129.062 | 136.075 | 158.090 | 175.118 | 190.097 | 222.141 | 322.184 | 337.642 | 345.178 <sup>+</sup> | 352.175 | 422.233 | 451.231 | 531.295 | 550.297 | 663.380 | 735.348 | 826.457 | Frac. Inten.(% of TIC) | 2.07 | 0.00 | 0.11 | 12.51 | 0.46 | 6.12 | 6.67 | 0.10 | 2.95 | 0.22 | 3.09 | 3.19 | 3.50 | 2.48 | 11.62 | 2.04 | 2.22 | 2.62 | 3.19 | 9.52 | 2.15 | 13.35 | 5.66 | 2.06 | 2.11 | Rel. Inten.(% of BP) | 15.48 | 0.02 | 0.83 | 93.73 | 3.45 | 45.81 | 49.92 | 0.78 | 22.08 | 1.61 | 23.15 | 23.91 | 26.20 | 18.59 | 87.04 | 15.28 | 16.59 | 19.60 | 23.92 | 71.27 | 16.13 | 100.00 | 42.36 | 15.41 | 15.81 | Score | -0.15 | 0.20 | 0.50 | -0.94 | 0.22 | 0.50 | -0.50 | 1.00 | 1.00 | 1.00 | 0.50 | 1.50 | -0.26 | -0.19 | 1.50 | -0.15 | -0.17 | -0.20 | -0.24 | 1.50 | -0.16 | 1.50 | 0.50 | 1.50 | 1.50 | Ion-type | PR | V |  |  | LI | ac | F |  | b2 | Y | y1-NH3 | y1 |  | y2 |  |  |  |  |  | y3 | y4 | y5 | b6 | y6 | y6 | Delta ppm |  | 6.8 | 29.5 |  | 13.6 | -22.2 |  | 16.9 |  | -29.1 | -4.3 | -17.1 | -4.9 |  | -11.7 |  |  |  |  | 2.1 | -2.7 | -3.5 | 8.0 | 13.4 | 13.4 |  |  |  |  |  |  |  |  |  |  | QKR |  |  |  |  |  |  |  |  |  |  |  |  |  |  |  |
| Fragment-ion (m/z)                                                                                                                                                                                                                                                                                                                                                                                                                                                                                                                                                                                                                                                                                                                                                                                                                                                                                                                                                                                                                                                                                                                                                                                                                                                                                                                                                                                                                                                                                                                                                                                                                                                                                                                                                                                                                                                                                                                                                                                                                                                                                                                                                                                                                                                                                                                                                                                                                                                                                                                                                                                                                                                                                                                                                | 60.054 | 70.066  | 72.083 | 84.080           | 86.098         | 101.069           | 110.070                         | 120.083                    | 129.062                     | 136.075            | 158.090 | 175.118     | 190.097           | 222.141                                                                 | 322.184            | 337.642 | 345.178 <sup>+</sup> | 352.175 | 422.233 | 451.231 | 531.295 | 550.297 | 663.380 | 735.348 | 826.457 |         |         |         |         |         |         |                      |         |         |         |         |         |         |         |         |                        |      |      |      |       |      |      |      |      |      |      |      |      |      |      |       |      |      |      |      |      |      |       |      |      |      |                      |       |      |      |       |      |       |       |      |       |      |       |       |       |       |       |       |       |       |       |       |       |        |       |       |       |       |       |      |      |       |      |      |       |      |      |      |      |      |       |       |      |       |       |       |       |      |       |      |      |      |      |          |    |   |  |  |    |    |   |  |    |   |        |    |  |    |  |  |  |  |  |    |    |    |    |    |    |           |  |     |      |  |      |       |  |      |  |       |      |       |      |  |       |  |  |  |  |     |      |      |     |      |      |  |  |  |  |  |  |  |  |  |  |     |  |  |  |  |  |  |  |  |  |  |  |  |  |  |  |
| Frac. Inten.(% of TIC)                                                                                                                                                                                                                                                                                                                                                                                                                                                                                                                                                                                                                                                                                                                                                                                                                                                                                                                                                                                                                                                                                                                                                                                                                                                                                                                                                                                                                                                                                                                                                                                                                                                                                                                                                                                                                                                                                                                                                                                                                                                                                                                                                                                                                                                                                                                                                                                                                                                                                                                                                                                                                                                                                                                                            | 2.07   | 0.00    | 0.11   | 12.51            | 0.46           | 6.12              | 6.67                            | 0.10                       | 2.95                        | 0.22               | 3.09    | 3.19        | 3.50              | 2.48                                                                    | 11.62              | 2.04    | 2.22                 | 2.62    | 3.19    | 9.52    | 2.15    | 13.35   | 5.66    | 2.06    | 2.11    |         |         |         |         |         |         |                      |         |         |         |         |         |         |         |         |                        |      |      |      |       |      |      |      |      |      |      |      |      |      |      |       |      |      |      |      |      |      |       |      |      |      |                      |       |      |      |       |      |       |       |      |       |      |       |       |       |       |       |       |       |       |       |       |       |        |       |       |       |       |       |      |      |       |      |      |       |      |      |      |      |      |       |       |      |       |       |       |       |      |       |      |      |      |      |          |    |   |  |  |    |    |   |  |    |   |        |    |  |    |  |  |  |  |  |    |    |    |    |    |    |           |  |     |      |  |      |       |  |      |  |       |      |       |      |  |       |  |  |  |  |     |      |      |     |      |      |  |  |  |  |  |  |  |  |  |  |     |  |  |  |  |  |  |  |  |  |  |  |  |  |  |  |
| Rel. Inten.(% of BP)                                                                                                                                                                                                                                                                                                                                                                                                                                                                                                                                                                                                                                                                                                                                                                                                                                                                                                                                                                                                                                                                                                                                                                                                                                                                                                                                                                                                                                                                                                                                                                                                                                                                                                                                                                                                                                                                                                                                                                                                                                                                                                                                                                                                                                                                                                                                                                                                                                                                                                                                                                                                                                                                                                                                              | 15.48  | 0.02    | 0.83   | 93.73            | 3.45           | 45.81             | 49.92                           | 0.78                       | 22.08                       | 1.61               | 23.15   | 23.91       | 26.20             | 18.59                                                                   | 87.04              | 15.28   | 16.59                | 19.60   | 23.92   | 71.27   | 16.13   | 100.00  | 42.36   | 15.41   | 15.81   |         |         |         |         |         |         |                      |         |         |         |         |         |         |         |         |                        |      |      |      |       |      |      |      |      |      |      |      |      |      |      |       |      |      |      |      |      |      |       |      |      |      |                      |       |      |      |       |      |       |       |      |       |      |       |       |       |       |       |       |       |       |       |       |       |        |       |       |       |       |       |      |      |       |      |      |       |      |      |      |      |      |       |       |      |       |       |       |       |      |       |      |      |      |      |          |    |   |  |  |    |    |   |  |    |   |        |    |  |    |  |  |  |  |  |    |    |    |    |    |    |           |  |     |      |  |      |       |  |      |  |       |      |       |      |  |       |  |  |  |  |     |      |      |     |      |      |  |  |  |  |  |  |  |  |  |  |     |  |  |  |  |  |  |  |  |  |  |  |  |  |  |  |
| Score                                                                                                                                                                                                                                                                                                                                                                                                                                                                                                                                                                                                                                                                                                                                                                                                                                                                                                                                                                                                                                                                                                                                                                                                                                                                                                                                                                                                                                                                                                                                                                                                                                                                                                                                                                                                                                                                                                                                                                                                                                                                                                                                                                                                                                                                                                                                                                                                                                                                                                                                                                                                                                                                                                                                                             | -0.15  | 0.20    | 0.50   | -0.94            | 0.22           | 0.50              | -0.50                           | 1.00                       | 1.00                        | 1.00               | 0.50    | 1.50        | -0.26             | -0.19                                                                   | 1.50               | -0.15   | -0.17                | -0.20   | -0.24   | 1.50    | -0.16   | 1.50    | 0.50    | 1.50    | 1.50    |         |         |         |         |         |         |                      |         |         |         |         |         |         |         |         |                        |      |      |      |       |      |      |      |      |      |      |      |      |      |      |       |      |      |      |      |      |      |       |      |      |      |                      |       |      |      |       |      |       |       |      |       |      |       |       |       |       |       |       |       |       |       |       |       |        |       |       |       |       |       |      |      |       |      |      |       |      |      |      |      |      |       |       |      |       |       |       |       |      |       |      |      |      |      |          |    |   |  |  |    |    |   |  |    |   |        |    |  |    |  |  |  |  |  |    |    |    |    |    |    |           |  |     |      |  |      |       |  |      |  |       |      |       |      |  |       |  |  |  |  |     |      |      |     |      |      |  |  |  |  |  |  |  |  |  |  |     |  |  |  |  |  |  |  |  |  |  |  |  |  |  |  |
| Ion-type                                                                                                                                                                                                                                                                                                                                                                                                                                                                                                                                                                                                                                                                                                                                                                                                                                                                                                                                                                                                                                                                                                                                                                                                                                                                                                                                                                                                                                                                                                                                                                                                                                                                                                                                                                                                                                                                                                                                                                                                                                                                                                                                                                                                                                                                                                                                                                                                                                                                                                                                                                                                                                                                                                                                                          | PR     | V       |        |                  | LI             | ac                | F                               |                            | b2                          | Y                  | y1-NH3  | y1          |                   | y2                                                                      |                    |         |                      |         |         | y3      | y4      | y5      | b6      | y6      | y6      |         |         |         |         |         |         |                      |         |         |         |         |         |         |         |         |                        |      |      |      |       |      |      |      |      |      |      |      |      |      |      |       |      |      |      |      |      |      |       |      |      |      |                      |       |      |      |       |      |       |       |      |       |      |       |       |       |       |       |       |       |       |       |       |       |        |       |       |       |       |       |      |      |       |      |      |       |      |      |      |      |      |       |       |      |       |       |       |       |      |       |      |      |      |      |          |    |   |  |  |    |    |   |  |    |   |        |    |  |    |  |  |  |  |  |    |    |    |    |    |    |           |  |     |      |  |      |       |  |      |  |       |      |       |      |  |       |  |  |  |  |     |      |      |     |      |      |  |  |  |  |  |  |  |  |  |  |     |  |  |  |  |  |  |  |  |  |  |  |  |  |  |  |
| Delta ppm                                                                                                                                                                                                                                                                                                                                                                                                                                                                                                                                                                                                                                                                                                                                                                                                                                                                                                                                                                                                                                                                                                                                                                                                                                                                                                                                                                                                                                                                                                                                                                                                                                                                                                                                                                                                                                                                                                                                                                                                                                                                                                                                                                                                                                                                                                                                                                                                                                                                                                                                                                                                                                                                                                                                                         |        | 6.8     | 29.5   |                  | 13.6           | -22.2             |                                 | 16.9                       |                             | -29.1              | -4.3    | -17.1       | -4.9              |                                                                         | -11.7              |         |                      |         |         | 2.1     | -2.7    | -3.5    | 8.0     | 13.4    | 13.4    |         |         |         |         |         |         |                      |         |         |         |         |         |         |         |         |                        |      |      |      |       |      |      |      |      |      |      |      |      |      |      |       |      |      |      |      |      |      |       |      |      |      |                      |       |      |      |       |      |       |       |      |       |      |       |       |       |       |       |       |       |       |       |       |       |        |       |       |       |       |       |      |      |       |      |      |       |      |      |      |      |      |       |       |      |       |       |       |       |      |       |      |      |      |      |          |    |   |  |  |    |    |   |  |    |   |        |    |  |    |  |  |  |  |  |    |    |    |    |    |    |           |  |     |      |  |      |       |  |      |  |       |      |       |      |  |       |  |  |  |  |     |      |      |     |      |      |  |  |  |  |  |  |  |  |  |  |     |  |  |  |  |  |  |  |  |  |  |  |  |  |  |  |
|                                                                                                                                                                                                                                                                                                                                                                                                                                                                                                                                                                                                                                                                                                                                                                                                                                                                                                                                                                                                                                                                                                                                                                                                                                                                                                                                                                                                                                                                                                                                                                                                                                                                                                                                                                                                                                                                                                                                                                                                                                                                                                                                                                                                                                                                                                                                                                                                                                                                                                                                                                                                                                                                                                                                                                   |        |         |        |                  |                |                   |                                 |                            |                             | QKR                |         |             |                   |                                                                         |                    |         |                      |         |         |         |         |         |         |         |         |         |         |         |         |         |         |                      |         |         |         |         |         |         |         |         |                        |      |      |      |       |      |      |      |      |      |      |      |      |      |      |       |      |      |      |      |      |      |       |      |      |      |                      |       |      |      |       |      |       |       |      |       |      |       |       |       |       |       |       |       |       |       |       |       |        |       |       |       |       |       |      |      |       |      |      |       |      |      |      |      |      |       |       |      |       |       |       |       |      |       |      |      |      |      |          |    |   |  |  |    |    |   |  |    |   |        |    |  |    |  |  |  |  |  |    |    |    |    |    |    |           |  |     |      |  |      |       |  |      |  |       |      |       |      |  |       |  |  |  |  |     |      |      |     |      |      |  |  |  |  |  |  |  |  |  |  |     |  |  |  |  |  |  |  |  |  |  |  |  |  |  |  |

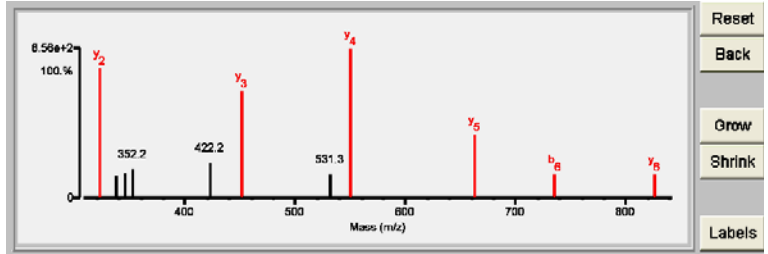

Result Summary

| Rank | Score | SPI (%) | BCS | # Unmatched Ions | # Variable sites | Sequence                   | MH <sup>+</sup> Calculated (Da) | MH <sup>+</sup> Error (Da) | MH <sup>+</sup> Error (ppm) | Protein MW/pi (Da) | Species | Accession #            | Protein Name                                                            |
|------|-------|---------|-----|------------------|------------------|----------------------------|---------------------------------|----------------------------|-----------------------------|--------------------|---------|------------------------|-------------------------------------------------------------------------|
| 1    | 16.38 | 79.9    | 7   | 6/24             | K34k             | (K)MSLK <b>GTTV</b> PDK(R) | 1277.6770                       | 114.0530                   | 7.2                         | 42438.8/4.96       | HUMAN   | <a href="#">Q16186</a> | Proteasomal ubiquitin receptor ADRM1 OS=Homo sapiens GN=ADRM1 PE=1 SV=2 |
| 2    | 5.39  | 55.8    | 3   | 12/24            | K42k             | (K)MSLK <b>GTTV</b> PDK(R) | 1277.6770                       | 114.0530                   | 7.2                         | 42438.8/4.96       | HUMAN   | <a href="#">Q16186</a> | Proteasomal ubiquitin receptor ADRM1 OS=Homo sapiens GN=ADRM1 PE=1 SV=2 |

Detailed Results

| Rank                    | Score  | SPI (%)          | BCS    | # Unmatched Ions | # Variable sites | Sequence                                        | MH <sup>+</sup> Calculated (Da) | MH <sup>+</sup> Error (Da) | MH <sup>+</sup> Error (ppm) | Protein MW/pi (Da) | Species        | Accession #            | MS-Digest Index #    | Protein Name                                                            |         |         |                       |                       |                              |                |                               |                                                 |                |                |
|-------------------------|--------|------------------|--------|------------------|------------------|-------------------------------------------------|---------------------------------|----------------------------|-----------------------------|--------------------|----------------|------------------------|----------------------|-------------------------------------------------------------------------|---------|---------|-----------------------|-----------------------|------------------------------|----------------|-------------------------------|-------------------------------------------------|----------------|----------------|
| 1                       | 16.38  | 79.9             | 7      | 6/24             | K34k             | (K)MS <b>L</b> IL/K/G <b>T</b> /T/V T/P D/K (R) | 1277.6770                       | 114.0530                   | 7.2                         | 42438.8/4.96       | HUMAN          | <a href="#">Q16186</a> | <a href="#">7886</a> | Proteasomal ubiquitin receptor ADRM1 OS=Homo sapiens GN=ADRM1 PE=1 SV=2 |         |         |                       |                       |                              |                |                               |                                                 |                |                |
| Fragment-Ion (m/z)      | 72.080 | 74.058           | 84.080 | 86.095           | 104.052          | 129.101                                         | 130.084                         | 147.113                    | 173.126                     | 180.095            | 191.084        | 219.073                | 322.185              | 359.191                                                                 | 406.224 | 414.235 | 443.260 <sup>+2</sup> | 444.265 <sup>+2</sup> | 530.791 <sup>+2</sup>        | 559.304        | 587.316 <sup>+2</sup>         | 621.852 <sup>+2</sup>                           | 660.354        | 818.431        |
| Frac. Inten. (% of TIC) | 0.17   | 5.79             | 0.35   | 0.14             | 19.38            | 0.07                                            | 2.49                            | 3.08                       | 7.62                        | 3.02               | 3.51           | 2.83                   | 2.28                 | 16.60                                                                   | 2.23    | 2.22    | 3.32                  | 2.48                  | 3.13                         | 5.06           | 2.41                          | 2.63                                            | 4.58           | 4.61           |
| Rel. Inten. (% of BP)   | 0.89   | 29.89            | 1.78   | 0.72             | 100.00           | 0.38                                            | 12.84                           | 15.88                      | 39.32                       | 15.56              | 18.12          | 14.61                  | 11.75                | 85.64                                                                   | 11.49   | 11.45   | 17.12                 | 12.78                 | 16.13                        | 26.13          | 12.44                         | 13.58                                           | 23.63          | 23.80          |
| Score                   | 0.50   | 1.50             | 0.50   | 0.22             | 0.50             | 0.20                                            | 0.50                            | 1.50                       | -0.39                       | 1.50               | 0.50           | 0.50                   | -0.12                | 1.50                                                                    | -0.11   | -0.11   | -0.17                 | -0.13                 | 1.50                         | 1.50           | 1.50                          | 1.50                                            | 1.50           | 1.50           |
| Ion-type                | V      | y <sup>++1</sup> | KQ     | LI               | a <sub>1</sub>   | RKQ                                             | y <sub>1</sub> -NH <sub>3</sub> | y <sub>1</sub>             |                             | y <sup>++3</sup>   | a <sub>2</sub> | b <sub>2</sub>         |                      | y <sub>3</sub>                                                          |         |         |                       |                       | y <sub>9</sub> <sup>+2</sup> | y <sub>5</sub> | y <sub>10</sub> <sup>+2</sup> | y <sub>11</sub> -H <sub>2</sub> O <sup>+2</sup> | y <sub>6</sub> | y <sub>8</sub> |
| Delta ppm               | -6.6   | -22.1            | -9.2   | -21.2            | -11.0            | -11.1                                           | -15.8                           | -2.1                       |                             | -27.7              | -6.7           | -30.5                  |                      |                                                                         |         |         |                       |                       | 10.0                         | -8.6           | -20.0                         | 23.1                                            | -3.2           | 6.4            |

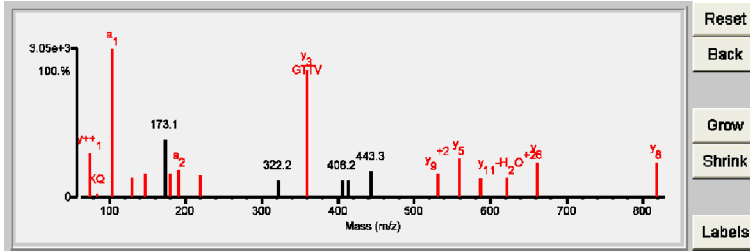

Result Summary

| Rank | Score | SPI (%) | BCS | # Unmatched Ions | # Variable sites | Sequence          | MH <sup>+</sup> Calculated (Da) | MH <sup>+</sup> Error (Da) | MH <sup>+</sup> Error (ppm) | Protein MW/pi (Da) | Species | Accession # | Protein Name                                                                                              |
|------|-------|---------|-----|------------------|------------------|-------------------|---------------------------------|----------------------------|-----------------------------|--------------------|---------|-------------|-----------------------------------------------------------------------------------------------------------|
| 1    | 13.17 | 83.6    | 6   | 6/25             | K239k            | (K)EELEEVIK(-)    | 1216.6307                       | 114.0540                   | 8.3                         | 26582.3/4.74       | HUMAN   | P28066      | Proteasome subunit alpha type-5 OS=Homo sapiens GN=PSMA5 PE=1 SV=3                                        |
| 2    | 7.13  | 65.9    | 2   | 10/25            | K2030k           | (R)LDEKLEEVNK(F)  | 1216.6420                       | 114.0428                   | -0.1                        | 295591.4/7.89      | HUMAN   | Q986JK0     | REVERSE ATP-binding cassette sub-family A member 12 OS=Homo sapiens GN=ABCA12 PE=1 SV=2                   |
| 3    | 5.57  | 54.6    | 2   | 11/25            | None             | (K)RQVSIEEGERK(A) | 1330.7074                       | -0.0226                    | -17.0                       | 23707.0/5.42       | HUMAN   | P20340      | Ras-related protein Rab-6A OS=Homo sapiens GN=RAB6A PE=1 SV=3                                             |
| 4    | 5.56  | 62.2    | 4   | 12/25            | K51k             | (K)LEDIEEDK(A)    | 1216.6307                       | 114.0540                   | 8.3                         | 27677.0/8.25       | HUMAN   | RP19404     | REVERSE NADH dehydrogenase [ubiquinone] flavoprotein 2, mitochondrial OS=Homo sapiens GN=NDUFV2 PE=1 SV=2 |
| 5    | 4.54  | 59.8    | 3   | 12/25            | None             | (K)LSFHQTQVSQR(L) | 1330.6862                       | -0.0015                    | -1.1                        | 71194.8/6.98       | HUMAN   | Q989Z0      | Protein TBRG4 OS=Homo sapiens GN=TBRG4 PE=1 SV=1                                                          |

Detailed Results

| Rank | Score | SPI (%) | BCS | # Unmatched Ions | # Variable sites | Sequence                 | MH <sup>+</sup> Calculated (Da) | MH <sup>+</sup> Error (Da) | MH <sup>+</sup> Error (ppm) | Protein MW/pi (Da) | Species | Accession # | MS-Digest Index # | Protein Name                                                       |
|------|-------|---------|-----|------------------|------------------|--------------------------|---------------------------------|----------------------------|-----------------------------|--------------------|---------|-------------|-------------------|--------------------------------------------------------------------|
| 1    | 13.17 | 83.6    | 6   | 6/25             | K239k            | (K)EELVLEEVVLEIK/D/I (-) | 1216.6307                       | 114.0540                   | 8.3                         | 26582.3/4.74       | HUMAN   | P28066      | 521763            | Proteasome subunit alpha type-5 OS=Homo sapiens GN=PSMA5 PE=1 SV=3 |

  

| Fragment-ion (m/z)      | 72.080 | 84.079 | 86.096 | 102.055 | 132.106 | 187.098 | 201.124 | 243.131 | 247.130 | 259.092             | 354.162 | 358.171 | 372.175 | 489.262             | 501.199 | 584.349             | 602.338             | 612.250 | 711.306             | 729.338 | 812.413             | 814.930 | 824.420             | 842.416 | 1181.540 |
|-------------------------|--------|--------|--------|---------|---------|---------|---------|---------|---------|---------------------|---------|---------|---------|---------------------|---------|---------------------|---------------------|---------|---------------------|---------|---------------------|---------|---------------------|---------|----------|
| Frac. Inten. (% of TIC) | 0.10   | 5.28   | 0.36   | 0.08    | 2.42    | 2.24    | 2.24    | 2.91    | 9.54    | 4.98                | 5.65    | 3.76    | 9.49    | 12.66               | 2.14    | 3.78                | 5.46                | 3.90    | 6.80                | 2.19    | 2.22                | 2.30    | 4.40                | 2.80    | 2.33     |
| Rel. Inten. (% of BP)   | 0.81   | 41.75  | 2.83   | 0.60    | 19.09   | 17.71   | 17.72   | 22.96   | 75.41   | 39.34               | 44.64   | 29.68   | 74.96   | 100.00              | 16.92   | 29.87               | 43.12               | 30.80   | 53.73               | 17.28   | 17.57               | 18.14   | 34.78               | 22.13   | 18.37    |
| Score                   | 0.50   | -0.42  | 0.22   | 1.00    | 1.50    | -0.18   | -0.18   | 0.75    | 1.50    | 0.75                | 0.50    | 0.75    | 0.75    | 1.50                | -0.17   | 0.75                | 1.50                | 0.25    | 0.25                | 0.50    | -0.18               | -0.18   | 0.25                | 0.50    | 0.25     |
| Ion-type                | V      | LI     | LI     | a1      | y1      | E       | LE      | y2      | b2      | b3-H <sub>2</sub> O | kD      | b3      | y3      | y4-H <sub>2</sub> O | y4      | b5-H <sub>2</sub> O | b6-H <sub>2</sub> O | b6      | b7-H <sub>2</sub> O | b7      | b9-H <sub>2</sub> O | b7      | b9-H <sub>2</sub> O | b9      |          |
| Delta ppm               | -5.2   |        | -9.6   |         | -1.5    |         |         | -12.9   | 5.1     | -2.2                | -10.1   | -4.4    | -4.4    | -9.9                |         | -21.1               | -2.2                | -19.2   | 11.5                |         |                     | 19.4    | 4.9                 | -24.3   |          |

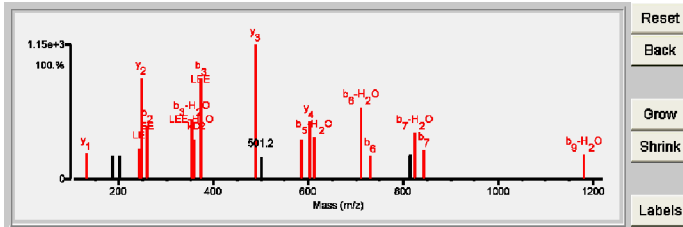

Result Summary

| Rank | Score | SPI (%) | BCS | # Unmatched Ions | Variable sites | Sequence                           | MH <sup>+</sup> Calculated (Da) | MH <sup>+</sup> Error (Da) | MH <sup>+</sup> Error (ppm) | Protein MW/pI (Da) | Species | Accession # | Protein Name                                                                               |
|------|-------|---------|-----|------------------|----------------|------------------------------------|---------------------------------|----------------------------|-----------------------------|--------------------|---------|-------------|--------------------------------------------------------------------------------------------|
| 1    | 18.83 | 85.9    | 9   | 5/25             | K201k          | (R)EVLEKQPVL <sup>SQ</sup> TEAR(D) | 1726.9334                       | 114.0610                   | 9.8                         | 29204.4/5.72       | HUMAN   | P28070      | Proteasome subunit beta type-4 OS=Homo sapiens GN=PSMB4 PE=1 SV=4                          |
| 2    | 7.76  | 51.7    | 4   | 12/25            | None           | (K)MRSQKIGEVIQEMQR(L)              | 1840.9611                       | 0.0332                     | 18.0                        | 73198.0/8.23       | HUMAN   | RQ567U6     | REVERSE Coiled-coil domain-containing protein 93 OS=Homo sapiens GN=CDC33 PE=1 SV=2        |
| 3    | 3.71  | 56.1    | 2   | 13/25            | M37m K28k      | (R)LDVRkPSSAPVpmSK(L)              | 1710.9571                       | 130.0372                   | -0.3                        | 57652.9/9.26       | HUMAN   | RPQC6C1     | REVERSE Ankyrin repeat domain-containing protein 34C OS=Homo sapiens GN=ANKRD34C PE=2 SV=1 |

Detailed Results

| Rank                                                                                                                                                                                                                                                                                                                                                                                                                                                                                                                                                                                                                                                                                                                                                                                                                                                                                                                                                                                                                                                                                                                                                                                                                                                                                                                                                                                                                                                                                                                                                                                                                                                                                                                                                                                                                                                                                                                                                                                                                                                                                                                                                                                                                                                                                                                                                                                                                                                                                                                                                                               | Score  | SPI (%) | BCS    | # Unmatched Ions | Variable sites | Sequence                                           | MH <sup>+</sup> Calculated (Da) | MH <sup>+</sup> Error (Da) | MH <sup>+</sup> Error (ppm) | Protein MW/pI (Da) | Species | Accession # | MS-Digest Index # | Protein Name                                                      |                    |         |                  |                       |         |         |                                  |         |                               |         |          |         |         |         |         |         |         |         |                       |         |         |         |         |                       |         |          |                         |      |      |      |      |      |      |      |      |      |      |      |      |      |      |      |      |      |      |      |       |      |       |      |      |      |                       |      |      |      |      |      |      |       |       |       |       |       |       |       |       |       |       |       |       |       |       |       |        |       |       |       |       |      |      |      |      |      |  |       |       |      |      |      |      |       |      |      |      |      |       |      |      |      |      |      |       |      |          |    |   |   |    |    |    |  |  |    |    |    |    |  |    |                  |    |                  |  |    |    |                                  |    |                               |  |    |           |     |       |       |       |       |  |  |  |       |     |     |      |  |      |     |       |      |  |      |      |      |     |      |  |     |
|------------------------------------------------------------------------------------------------------------------------------------------------------------------------------------------------------------------------------------------------------------------------------------------------------------------------------------------------------------------------------------------------------------------------------------------------------------------------------------------------------------------------------------------------------------------------------------------------------------------------------------------------------------------------------------------------------------------------------------------------------------------------------------------------------------------------------------------------------------------------------------------------------------------------------------------------------------------------------------------------------------------------------------------------------------------------------------------------------------------------------------------------------------------------------------------------------------------------------------------------------------------------------------------------------------------------------------------------------------------------------------------------------------------------------------------------------------------------------------------------------------------------------------------------------------------------------------------------------------------------------------------------------------------------------------------------------------------------------------------------------------------------------------------------------------------------------------------------------------------------------------------------------------------------------------------------------------------------------------------------------------------------------------------------------------------------------------------------------------------------------------------------------------------------------------------------------------------------------------------------------------------------------------------------------------------------------------------------------------------------------------------------------------------------------------------------------------------------------------------------------------------------------------------------------------------------------------|--------|---------|--------|------------------|----------------|----------------------------------------------------|---------------------------------|----------------------------|-----------------------------|--------------------|---------|-------------|-------------------|-------------------------------------------------------------------|--------------------|---------|------------------|-----------------------|---------|---------|----------------------------------|---------|-------------------------------|---------|----------|---------|---------|---------|---------|---------|---------|---------|-----------------------|---------|---------|---------|---------|-----------------------|---------|----------|-------------------------|------|------|------|------|------|------|------|------|------|------|------|------|------|------|------|------|------|------|------|-------|------|-------|------|------|------|-----------------------|------|------|------|------|------|------|-------|-------|-------|-------|-------|-------|-------|-------|-------|-------|-------|-------|-------|-------|-------|--------|-------|-------|-------|-------|------|------|------|------|------|--|-------|-------|------|------|------|------|-------|------|------|------|------|-------|------|------|------|------|------|-------|------|----------|----|---|---|----|----|----|--|--|----|----|----|----|--|----|------------------|----|------------------|--|----|----|----------------------------------|----|-------------------------------|--|----|-----------|-----|-------|-------|-------|-------|--|--|--|-------|-----|-----|------|--|------|-----|-------|------|--|------|------|------|-----|------|--|-----|
| 1                                                                                                                                                                                                                                                                                                                                                                                                                                                                                                                                                                                                                                                                                                                                                                                                                                                                                                                                                                                                                                                                                                                                                                                                                                                                                                                                                                                                                                                                                                                                                                                                                                                                                                                                                                                                                                                                                                                                                                                                                                                                                                                                                                                                                                                                                                                                                                                                                                                                                                                                                                                  | 18.83  | 85.9    | 9      | 5/25             | K201k          | (R)E V L E k Q P / V / L / S / Q / T E / A / R (D) | 1726.9334                       | 114.0610                   | 9.8                         | 29204.4/5.72       | HUMAN   | P28070      | 524003            | Proteasome subunit beta type-4 OS=Homo sapiens GN=PSMB4 PE=1 SV=4 |                    |         |                  |                       |         |         |                                  |         |                               |         |          |         |         |         |         |         |         |         |                       |         |         |         |         |                       |         |          |                         |      |      |      |      |      |      |      |      |      |      |      |      |      |      |      |      |      |      |      |       |      |       |      |      |      |                       |      |      |      |      |      |      |       |       |       |       |       |       |       |       |       |       |       |       |       |       |       |        |       |       |       |       |      |      |      |      |      |  |       |       |      |      |      |      |       |      |      |      |      |       |      |      |      |      |      |       |      |          |    |   |   |    |    |    |  |  |    |    |    |    |  |    |                  |    |                  |  |    |    |                                  |    |                               |  |    |           |     |       |       |       |       |  |  |  |       |     |     |      |  |      |     |       |      |  |      |      |      |     |      |  |     |
| <table border="1"> <thead> <tr> <th>Fragment-ion (m/z)</th> <th>70.065</th> <th>72.079</th> <th>84.042</th> <th>84.080</th> <th>86.095</th> <th>101.067</th> <th>104.051</th> <th>169.132</th> <th>175.116</th> <th>201.125</th> <th>229.122</th> <th>246.159</th> <th>340.151</th> <th>371.204</th> <th>452.250</th> <th>476.238</th> <th>500.774</th> <th>696.312<sup>+3</sup></th> <th>604.317</th> <th>691.334</th> <th>695.369</th> <th>804.426</th> <th>806.934<sup>+2</sup></th> <th>840.364</th> <th>1000.543</th> </tr> </thead> <tbody> <tr> <td>Frac. Inten. (% of TIC)</td> <td>0.00</td> <td>0.14</td> <td>0.08</td> <td>0.29</td> <td>0.34</td> <td>0.09</td> <td>2.76</td> <td>3.27</td> <td>3.34</td> <td>5.86</td> <td>5.32</td> <td>5.15</td> <td>2.80</td> <td>8.12</td> <td>3.51</td> <td>3.15</td> <td>3.76</td> <td>2.52</td> <td>4.96</td> <td>10.36</td> <td>2.49</td> <td>16.71</td> <td>3.76</td> <td>2.80</td> <td>8.40</td> </tr> <tr> <td>Rel. Inten. (% of BP)</td> <td>0.00</td> <td>0.83</td> <td>0.46</td> <td>1.76</td> <td>2.06</td> <td>0.56</td> <td>16.52</td> <td>19.59</td> <td>19.98</td> <td>35.08</td> <td>31.84</td> <td>30.80</td> <td>16.73</td> <td>48.59</td> <td>21.00</td> <td>18.86</td> <td>22.52</td> <td>15.10</td> <td>29.67</td> <td>62.01</td> <td>14.92</td> <td>100.00</td> <td>22.52</td> <td>16.73</td> <td>50.25</td> </tr> <tr> <td>Score</td> <td>0.20</td> <td>0.50</td> <td>1.00</td> <td>0.50</td> <td>0.22</td> <td></td> <td>-0.17</td> <td>-0.20</td> <td>1.50</td> <td>0.75</td> <td>0.50</td> <td>1.50</td> <td>-0.17</td> <td>0.75</td> <td>1.50</td> <td>1.50</td> <td>1.50</td> <td>-0.15</td> <td>1.50</td> <td>1.50</td> <td>0.25</td> <td>1.50</td> <td>1.50</td> <td>-0.17</td> <td>1.50</td> </tr> <tr> <td>Ion-type</td> <td>PR</td> <td>V</td> <td>E</td> <td>KQ</td> <td>LI</td> <td>KQ</td> <td></td> <td></td> <td>y1</td> <td>a2</td> <td>b2</td> <td>y2</td> <td></td> <td>kQ</td> <td>y<sup>++8</sup></td> <td>y4</td> <td>y<sup>++9</sup></td> <td></td> <td>y5</td> <td>y6</td> <td>b<sub>5</sub>-H<sub>2</sub>O</td> <td>y7</td> <td>y1<sub>3</sub><sup>+2</sup></td> <td></td> <td>y9</td> </tr> <tr> <td>Delta ppm</td> <td>2.5</td> <td>-17.7</td> <td>-27.2</td> <td>-14.0</td> <td>-18.9</td> <td></td> <td></td> <td></td> <td>-16.9</td> <td>0.2</td> <td>9.2</td> <td>13.5</td> <td></td> <td>-2.5</td> <td>4.1</td> <td>-17.3</td> <td>-1.7</td> <td></td> <td>20.2</td> <td>-4.4</td> <td>-5.8</td> <td>6.2</td> <td>-2.7</td> <td></td> <td>0.5</td> </tr> </tbody> </table> |        |         |        |                  |                |                                                    |                                 |                            |                             |                    |         |             |                   |                                                                   | Fragment-ion (m/z) | 70.065  | 72.079           | 84.042                | 84.080  | 86.095  | 101.067                          | 104.051 | 169.132                       | 175.116 | 201.125  | 229.122 | 246.159 | 340.151 | 371.204 | 452.250 | 476.238 | 500.774 | 696.312 <sup>+3</sup> | 604.317 | 691.334 | 695.369 | 804.426 | 806.934 <sup>+2</sup> | 840.364 | 1000.543 | Frac. Inten. (% of TIC) | 0.00 | 0.14 | 0.08 | 0.29 | 0.34 | 0.09 | 2.76 | 3.27 | 3.34 | 5.86 | 5.32 | 5.15 | 2.80 | 8.12 | 3.51 | 3.15 | 3.76 | 2.52 | 4.96 | 10.36 | 2.49 | 16.71 | 3.76 | 2.80 | 8.40 | Rel. Inten. (% of BP) | 0.00 | 0.83 | 0.46 | 1.76 | 2.06 | 0.56 | 16.52 | 19.59 | 19.98 | 35.08 | 31.84 | 30.80 | 16.73 | 48.59 | 21.00 | 18.86 | 22.52 | 15.10 | 29.67 | 62.01 | 14.92 | 100.00 | 22.52 | 16.73 | 50.25 | Score | 0.20 | 0.50 | 1.00 | 0.50 | 0.22 |  | -0.17 | -0.20 | 1.50 | 0.75 | 0.50 | 1.50 | -0.17 | 0.75 | 1.50 | 1.50 | 1.50 | -0.15 | 1.50 | 1.50 | 0.25 | 1.50 | 1.50 | -0.17 | 1.50 | Ion-type | PR | V | E | KQ | LI | KQ |  |  | y1 | a2 | b2 | y2 |  | kQ | y <sup>++8</sup> | y4 | y <sup>++9</sup> |  | y5 | y6 | b <sub>5</sub> -H <sub>2</sub> O | y7 | y1 <sub>3</sub> <sup>+2</sup> |  | y9 | Delta ppm | 2.5 | -17.7 | -27.2 | -14.0 | -18.9 |  |  |  | -16.9 | 0.2 | 9.2 | 13.5 |  | -2.5 | 4.1 | -17.3 | -1.7 |  | 20.2 | -4.4 | -5.8 | 6.2 | -2.7 |  | 0.5 |
| Fragment-ion (m/z)                                                                                                                                                                                                                                                                                                                                                                                                                                                                                                                                                                                                                                                                                                                                                                                                                                                                                                                                                                                                                                                                                                                                                                                                                                                                                                                                                                                                                                                                                                                                                                                                                                                                                                                                                                                                                                                                                                                                                                                                                                                                                                                                                                                                                                                                                                                                                                                                                                                                                                                                                                 | 70.065 | 72.079  | 84.042 | 84.080           | 86.095         | 101.067                                            | 104.051                         | 169.132                    | 175.116                     | 201.125            | 229.122 | 246.159     | 340.151           | 371.204                                                           | 452.250            | 476.238 | 500.774          | 696.312 <sup>+3</sup> | 604.317 | 691.334 | 695.369                          | 804.426 | 806.934 <sup>+2</sup>         | 840.364 | 1000.543 |         |         |         |         |         |         |         |                       |         |         |         |         |                       |         |          |                         |      |      |      |      |      |      |      |      |      |      |      |      |      |      |      |      |      |      |      |       |      |       |      |      |      |                       |      |      |      |      |      |      |       |       |       |       |       |       |       |       |       |       |       |       |       |       |       |        |       |       |       |       |      |      |      |      |      |  |       |       |      |      |      |      |       |      |      |      |      |       |      |      |      |      |      |       |      |          |    |   |   |    |    |    |  |  |    |    |    |    |  |    |                  |    |                  |  |    |    |                                  |    |                               |  |    |           |     |       |       |       |       |  |  |  |       |     |     |      |  |      |     |       |      |  |      |      |      |     |      |  |     |
| Frac. Inten. (% of TIC)                                                                                                                                                                                                                                                                                                                                                                                                                                                                                                                                                                                                                                                                                                                                                                                                                                                                                                                                                                                                                                                                                                                                                                                                                                                                                                                                                                                                                                                                                                                                                                                                                                                                                                                                                                                                                                                                                                                                                                                                                                                                                                                                                                                                                                                                                                                                                                                                                                                                                                                                                            | 0.00   | 0.14    | 0.08   | 0.29             | 0.34           | 0.09                                               | 2.76                            | 3.27                       | 3.34                        | 5.86               | 5.32    | 5.15        | 2.80              | 8.12                                                              | 3.51               | 3.15    | 3.76             | 2.52                  | 4.96    | 10.36   | 2.49                             | 16.71   | 3.76                          | 2.80    | 8.40     |         |         |         |         |         |         |         |                       |         |         |         |         |                       |         |          |                         |      |      |      |      |      |      |      |      |      |      |      |      |      |      |      |      |      |      |      |       |      |       |      |      |      |                       |      |      |      |      |      |      |       |       |       |       |       |       |       |       |       |       |       |       |       |       |       |        |       |       |       |       |      |      |      |      |      |  |       |       |      |      |      |      |       |      |      |      |      |       |      |      |      |      |      |       |      |          |    |   |   |    |    |    |  |  |    |    |    |    |  |    |                  |    |                  |  |    |    |                                  |    |                               |  |    |           |     |       |       |       |       |  |  |  |       |     |     |      |  |      |     |       |      |  |      |      |      |     |      |  |     |
| Rel. Inten. (% of BP)                                                                                                                                                                                                                                                                                                                                                                                                                                                                                                                                                                                                                                                                                                                                                                                                                                                                                                                                                                                                                                                                                                                                                                                                                                                                                                                                                                                                                                                                                                                                                                                                                                                                                                                                                                                                                                                                                                                                                                                                                                                                                                                                                                                                                                                                                                                                                                                                                                                                                                                                                              | 0.00   | 0.83    | 0.46   | 1.76             | 2.06           | 0.56                                               | 16.52                           | 19.59                      | 19.98                       | 35.08              | 31.84   | 30.80       | 16.73             | 48.59                                                             | 21.00              | 18.86   | 22.52            | 15.10                 | 29.67   | 62.01   | 14.92                            | 100.00  | 22.52                         | 16.73   | 50.25    |         |         |         |         |         |         |         |                       |         |         |         |         |                       |         |          |                         |      |      |      |      |      |      |      |      |      |      |      |      |      |      |      |      |      |      |      |       |      |       |      |      |      |                       |      |      |      |      |      |      |       |       |       |       |       |       |       |       |       |       |       |       |       |       |       |        |       |       |       |       |      |      |      |      |      |  |       |       |      |      |      |      |       |      |      |      |      |       |      |      |      |      |      |       |      |          |    |   |   |    |    |    |  |  |    |    |    |    |  |    |                  |    |                  |  |    |    |                                  |    |                               |  |    |           |     |       |       |       |       |  |  |  |       |     |     |      |  |      |     |       |      |  |      |      |      |     |      |  |     |
| Score                                                                                                                                                                                                                                                                                                                                                                                                                                                                                                                                                                                                                                                                                                                                                                                                                                                                                                                                                                                                                                                                                                                                                                                                                                                                                                                                                                                                                                                                                                                                                                                                                                                                                                                                                                                                                                                                                                                                                                                                                                                                                                                                                                                                                                                                                                                                                                                                                                                                                                                                                                              | 0.20   | 0.50    | 1.00   | 0.50             | 0.22           |                                                    | -0.17                           | -0.20                      | 1.50                        | 0.75               | 0.50    | 1.50        | -0.17             | 0.75                                                              | 1.50               | 1.50    | 1.50             | -0.15                 | 1.50    | 1.50    | 0.25                             | 1.50    | 1.50                          | -0.17   | 1.50     |         |         |         |         |         |         |         |                       |         |         |         |         |                       |         |          |                         |      |      |      |      |      |      |      |      |      |      |      |      |      |      |      |      |      |      |      |       |      |       |      |      |      |                       |      |      |      |      |      |      |       |       |       |       |       |       |       |       |       |       |       |       |       |       |       |        |       |       |       |       |      |      |      |      |      |  |       |       |      |      |      |      |       |      |      |      |      |       |      |      |      |      |      |       |      |          |    |   |   |    |    |    |  |  |    |    |    |    |  |    |                  |    |                  |  |    |    |                                  |    |                               |  |    |           |     |       |       |       |       |  |  |  |       |     |     |      |  |      |     |       |      |  |      |      |      |     |      |  |     |
| Ion-type                                                                                                                                                                                                                                                                                                                                                                                                                                                                                                                                                                                                                                                                                                                                                                                                                                                                                                                                                                                                                                                                                                                                                                                                                                                                                                                                                                                                                                                                                                                                                                                                                                                                                                                                                                                                                                                                                                                                                                                                                                                                                                                                                                                                                                                                                                                                                                                                                                                                                                                                                                           | PR     | V       | E      | KQ               | LI             | KQ                                                 |                                 |                            | y1                          | a2                 | b2      | y2          |                   | kQ                                                                | y <sup>++8</sup>   | y4      | y <sup>++9</sup> |                       | y5      | y6      | b <sub>5</sub> -H <sub>2</sub> O | y7      | y1 <sub>3</sub> <sup>+2</sup> |         | y9       |         |         |         |         |         |         |         |                       |         |         |         |         |                       |         |          |                         |      |      |      |      |      |      |      |      |      |      |      |      |      |      |      |      |      |      |      |       |      |       |      |      |      |                       |      |      |      |      |      |      |       |       |       |       |       |       |       |       |       |       |       |       |       |       |       |        |       |       |       |       |      |      |      |      |      |  |       |       |      |      |      |      |       |      |      |      |      |       |      |      |      |      |      |       |      |          |    |   |   |    |    |    |  |  |    |    |    |    |  |    |                  |    |                  |  |    |    |                                  |    |                               |  |    |           |     |       |       |       |       |  |  |  |       |     |     |      |  |      |     |       |      |  |      |      |      |     |      |  |     |
| Delta ppm                                                                                                                                                                                                                                                                                                                                                                                                                                                                                                                                                                                                                                                                                                                                                                                                                                                                                                                                                                                                                                                                                                                                                                                                                                                                                                                                                                                                                                                                                                                                                                                                                                                                                                                                                                                                                                                                                                                                                                                                                                                                                                                                                                                                                                                                                                                                                                                                                                                                                                                                                                          | 2.5    | -17.7   | -27.2  | -14.0            | -18.9          |                                                    |                                 |                            | -16.9                       | 0.2                | 9.2     | 13.5        |                   | -2.5                                                              | 4.1                | -17.3   | -1.7             |                       | 20.2    | -4.4    | -5.8                             | 6.2     | -2.7                          |         | 0.5      |         |         |         |         |         |         |         |                       |         |         |         |         |                       |         |          |                         |      |      |      |      |      |      |      |      |      |      |      |      |      |      |      |      |      |      |      |       |      |       |      |      |      |                       |      |      |      |      |      |      |       |       |       |       |       |       |       |       |       |       |       |       |       |       |       |        |       |       |       |       |      |      |      |      |      |  |       |       |      |      |      |      |       |      |      |      |      |       |      |      |      |      |      |       |      |          |    |   |   |    |    |    |  |  |    |    |    |    |  |    |                  |    |                  |  |    |    |                                  |    |                               |  |    |           |     |       |       |       |       |  |  |  |       |     |     |      |  |      |     |       |      |  |      |      |      |     |      |  |     |

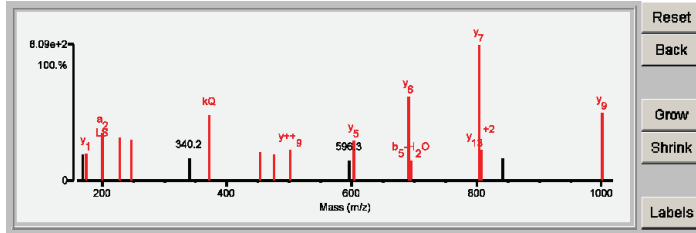

Result Summary

| Rank | Score | SPI (%) | BCS | # Unmatched Ions | Variable sites | Sequence                             | MH <sup>+</sup> Calculated (Da) | MH <sup>+</sup> Error (Da) | MH <sup>+</sup> Error (ppm) | Protein MW/pl (Da) | Species | Accession # | Protein Name                                                 |
|------|-------|---------|-----|------------------|----------------|--------------------------------------|---------------------------------|----------------------------|-----------------------------|--------------------|---------|-------------|--------------------------------------------------------------|
| 1    | 13.29 | 67.4    | 5   | 6/24             | K377k          | (R)WENHNKSLQLEAQT <sup>Y</sup> QR(I) | 2145.0472                       | 114.0850                   | 18.6                        | 57819.3/5.40       | HUMAN   | O95376      | Protein ariadne-2 homolog OS=Homo sapiens GN=ARIH2 PE=1 SV=1 |

Detailed Results

| Rank                    | Score  | SPI (%) | BCS    | # Unmatched Ions | Variable sites | Sequence                             | MH <sup>+</sup> Calculated (Da) | MH <sup>+</sup> Error (Da) | MH <sup>+</sup> Error (ppm) | Protein MW/pl (Da) | Species | Accession # | MS-Digest Index # | Protein Name                                                 |                       |         |         |         |         |         |         |         |         |         |
|-------------------------|--------|---------|--------|------------------|----------------|--------------------------------------|---------------------------------|----------------------------|-----------------------------|--------------------|---------|-------------|-------------------|--------------------------------------------------------------|-----------------------|---------|---------|---------|---------|---------|---------|---------|---------|---------|
| 1                       | 13.29  | 67.4    | 5      | 6/24             | K377k          | (R)WENHNKSLQLEAQT <sup>Y</sup> QR(I) | 2145.0472                       | 114.0850                   | 18.6                        | 57819.3/5.40       | HUMAN   | O95376      | 34041             | Protein ariadne-2 homolog OS=Homo sapiens GN=ARIH2 PE=1 SV=1 |                       |         |         |         |         |         |         |         |         |         |
| Fragment-ion (m/z)      | 70.065 | 74.060  | 84.044 | 84.080           | 86.097         | 101.071                              | 102.057                         | 110.073                    | 129.101                     | 132.083            | 136.076 | 159.090     | 175.121           | 303.178                                                      | 339.190 <sup>+2</sup> | 366.179 | 466.246 | 521.231 | 551.268 | 568.287 | 678.328 | 695.357 | 747.365 | 766.392 |
| Frac. Inten. (% of TIC) | 0.01   | 4.36    | 0.71   | 0.82             | 0.96           | 0.33                                 | 0.19                            | 0.12                       | 0.24                        | 6.55               | 0.36    | 0.40        | 5.95              | 5.43                                                         | 4.03                  | 5.35    | 10.99   | 3.84    | 5.78    | 6.53    | 11.85   | 6.36    | 6.21    | 12.63   |
| Rel. Inten. (% of BP)   | 0.08   | 34.52   | 5.66   | 6.50             | 7.57           | 2.59                                 | 1.54                            | 0.93                       | 1.89                        | 51.88              | 2.84    | 3.20        | 47.11             | 42.99                                                        | 31.90                 | 42.40   | 87.06   | 30.42   | 45.76   | 51.70   | 93.87   | 50.41   | 49.14   | 100.00  |
| Score                   | 0.20   | -0.35   | 1.00   | 0.50             | 0.22           |                                      |                                 | 1.00                       | 0.20                        | -0.52              | 1.00    | 2.00        | 1.50              | 1.50                                                         | -0.32                 | -0.42   | 1.50    | 0.75    | -0.46   | -0.52   | 0.50    | 1.50    | 0.50    | 1.50    |
| Ion-type                | PR     |         | E      | KQ               | LI             | KQ                                   | E                               | H                          | RKQ                         |                    | Y       | a1          | y1                | y2                                                           |                       |         | y3      | QTYQ    |         |         | y5-NH3  | y5      | b++11   | y6      |
| Delta ppm               | -7.5   |         | -1.1   | -5.7             | 2.0            |                                      |                                 | 13.9                       | -7.3                        |                    | 0.1     | -14.3       | 12.3              | 2.9                                                          |                       |         | 11.5    | -9.9    |         |         | 10.5    | 14.9    | 5.1     | 10.4    |

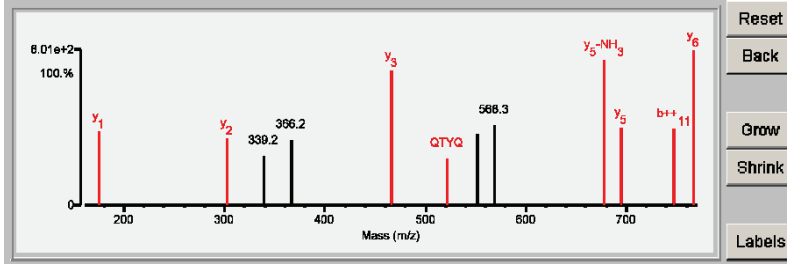

Result Summary

| Rank | Score | SPI (%) | BCS | # Unmatched Ions | Variable sites | Sequence                            | MH <sup>+</sup> Calculated (Da) | MH <sup>+</sup> Error (Da) | MH <sup>+</sup> Error (ppm) | Protein MW/pl (Da) | Species | Accession #            | Protein Name                                             |
|------|-------|---------|-----|------------------|----------------|-------------------------------------|---------------------------------|----------------------------|-----------------------------|--------------------|---------|------------------------|----------------------------------------------------------|
| 1    | 12.66 | 53.2    | 9   | 9/24             | K153k          | (R)DMLLANPHEL <del>S</del> LLKER(N) | 1879.0106                       | 114.0636                   | 10.4                        | 44522.8/4.95       | HUMAN   | <a href="#">Q5TDH0</a> | Protein DDI1 homolog 2 OS=Homo sapiens GN=DDI2 PE=1 SV=1 |

Detailed Results

| Rank                    | Score  | SPI (%) | BCS    | # Unmatched Ions | Variable sites | Sequence                                                 | MH <sup>+</sup> Calculated (Da) | MH <sup>+</sup> Error (Da) | MH <sup>+</sup> Error (ppm) | Protein MW/pl (Da) | Species | Accession #            | MS-Digest Index #      | Protein Name                                             |         |         |         |         |         |         |                       |                       |         |          |
|-------------------------|--------|---------|--------|------------------|----------------|----------------------------------------------------------|---------------------------------|----------------------------|-----------------------------|--------------------|---------|------------------------|------------------------|----------------------------------------------------------|---------|---------|---------|---------|---------|---------|-----------------------|-----------------------|---------|----------|
| 1                       | 12.66  | 53.2    | 9      | 9/24             | K153k          | (R)D M \ L L / A N / P H / E L / S L / L / K / E / R (N) | 1879.0106                       | 114.0636                   | 10.4                        | 44522.8/4.95       | HUMAN   | <a href="#">Q5TDH0</a> | <a href="#">152905</a> | Protein DDI1 homolog 2 OS=Homo sapiens GN=DDI2 PE=1 SV=1 |         |         |         |         |         |         |                       |                       |         |          |
| Fragment-ion (m/z)      | 70.064 | 72.079  | 84.080 | 86.096           | 87.097         | 110.069                                                  | 112.110                         | 120.080                    | 153.063                     | 171.075            | 175.119 | 199.178                | 219.079                | 235.116                                                  | 247.073 | 304.161 | 364.166 | 483.248 | 546.293 | 659.379 | 668.354 <sup>+2</sup> | 760.916 <sup>+2</sup> | 859.500 | 1101.613 |
| Frac. Inten. (% of TIC) | 0.00   | 2.85    | 8.13   | 1.12             | 2.74           | 0.09                                                     | 3.77                            | 3.53                       | 2.56                        | 14.35              | 3.44    | 6.09                   | 7.42                   | 6.04                                                     | 2.74    | 3.28    | 3.24    | 2.82    | 7.13    | 5.99    | 4.20                  | 2.89                  | 2.67    | 2.91     |
| Rel. Inten. (% of BP)   | 0.03   | 19.85   | 56.63  | 7.79             | 19.08          | 0.60                                                     | 26.28                           | 24.61                      | 17.83                       | 100.00             | 23.99   | 42.40                  | 51.73                  | 42.11                                                    | 19.07   | 22.89   | 22.55   | 19.63   | 49.68   | 41.71   | 29.26                 | 20.16                 | 18.60   | 20.24    |
| Score                   | 0.20   | -0.20   | -0.57  | 0.22             | -0.19          | 1.00                                                     | -0.26                           | -0.25                      | -0.18                       | -1.00              | 1.50    | -0.42                  | 0.50                   | 0.75                                                     | 0.50    | 1.50    | 0.75    | -0.20   | 1.50    | 1.50    | 1.50                  | 1.50                  | 1.50    | 1.50     |
| Ion-type                | PR     |         | LI     |                  |                | H                                                        |                                 |                            |                             |                    | y1      |                        | a2                     | PH                                                       | b2      | y2      | PHE     |         | y3      | y4      | y10 <sup>+2</sup>     | y12 <sup>+2</sup>     | y6      | y8       |
| Delta ppm               | -11.8  |         | -10.8  |                  |                | -23.4                                                    |                                 |                            |                             |                    | 3.1     |                        | -7.7                   | -15.5                                                    | -9.7    | -3.1    | 8.7     |         | -12.1   | -6.5    | -27.9                 | 4.0                   | 0.4     | -11.8    |

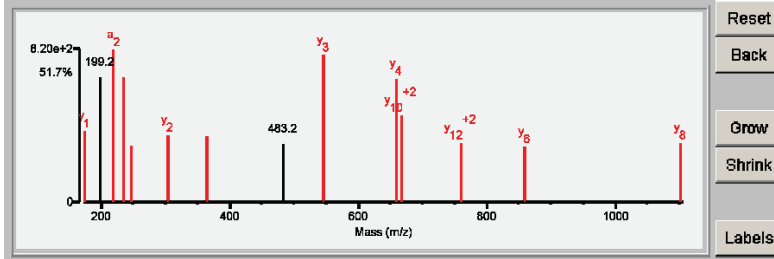

Result Summary

| Rank | Score | SPI (%) | BCS | # Unmatched Ions | Variable sites | Sequence                                                                                                                         | MH <sup>+</sup> Calculated (Da) | MH <sup>+</sup> Error (Da) | MH <sup>+</sup> Error (ppm) | Protein MW/pi (Da) | Species | Accession # | Protein Name                                                             |
|------|-------|---------|-----|------------------|----------------|----------------------------------------------------------------------------------------------------------------------------------|---------------------------------|----------------------------|-----------------------------|--------------------|---------|-------------|--------------------------------------------------------------------------|
| 1    | 21.92 | 83.3    | 10  | 4/25             | K170k          | (R)NPP <del>L</del> A <del>E</del> A <del>L</del> L <del>S</del> G <del>D</del> L <del>E</del> K <del>F</del> S <del>R</del> (V) | 1957.0389                       | 114.0731                   | 14.6                        | 44522.8/4.95       | HUMAN   | Q5TDH0      | Protein DDI1 homolog 2 OS=Homo sapiens GN=DDI2 PE=1 SV=1                 |
| 2    | 5.43  | 51.6    | 2   | 13/25            | None           | (K)NPVNNLIRK <del>D</del> Y <del>L</del> E <del>E</del> P <del>E</del> K(T)                                                      | 2071.0818                       | 0.0302                     | 14.6                        | 61002.8/5.80       | HUMAN   | Q9NQS3      | Poliovirus receptor-related protein 3 OS=Homo sapiens GN=PVRL3 PE=1 SV=1 |

Detailed Results

| Rank                                                                                                                                                                                                                                                                                                                                                                                                                                                                                                                                                                                                                                                                                                                                                                                                                                                                                                                                                                                                                                                                                                                                                                                                                                                                                                                                                                                                                                                                                                                                                                                                                                                                                                                                                                                                                                                                                                                                                                                                                                                                                                                                                                                                                                                                                                                                                                                                                                                                                              | Score  | SPI (%) | BCS    | # Unmatched Ions | Variable sites | Sequence                                                                                                                         | MH <sup>+</sup> Calculated (Da) | MH <sup>+</sup> Error (Da) | MH <sup>+</sup> Error (ppm) | Protein MW/pi (Da) | Species | Accession #           | MS-Digest Index # | Protein Name                                             |                       |         |                       |         |         |                       |         |                       |          |          |          |         |                       |         |                       |                       |         |                       |         |         |                       |         |                       |          |          |          |                         |      |      |      |      |      |      |      |      |      |      |      |      |      |      |      |      |       |      |      |      |      |       |      |      |      |                       |      |       |      |       |      |      |       |       |       |       |       |       |       |       |       |       |       |       |       |       |       |        |       |       |       |       |      |       |  |  |       |      |      |      |      |       |      |      |      |      |      |      |      |      |      |      |       |      |      |      |      |          |    |  |  |   |  |    |   |    |    |    |    |                  |       |                   |                   |    |                   |    |    |                   |  |                   |    |    |     |           |      |  |  |  |      |      |     |      |     |  |      |      |      |     |       |     |      |      |      |      |  |      |      |      |     |
|---------------------------------------------------------------------------------------------------------------------------------------------------------------------------------------------------------------------------------------------------------------------------------------------------------------------------------------------------------------------------------------------------------------------------------------------------------------------------------------------------------------------------------------------------------------------------------------------------------------------------------------------------------------------------------------------------------------------------------------------------------------------------------------------------------------------------------------------------------------------------------------------------------------------------------------------------------------------------------------------------------------------------------------------------------------------------------------------------------------------------------------------------------------------------------------------------------------------------------------------------------------------------------------------------------------------------------------------------------------------------------------------------------------------------------------------------------------------------------------------------------------------------------------------------------------------------------------------------------------------------------------------------------------------------------------------------------------------------------------------------------------------------------------------------------------------------------------------------------------------------------------------------------------------------------------------------------------------------------------------------------------------------------------------------------------------------------------------------------------------------------------------------------------------------------------------------------------------------------------------------------------------------------------------------------------------------------------------------------------------------------------------------------------------------------------------------------------------------------------------------|--------|---------|--------|------------------|----------------|----------------------------------------------------------------------------------------------------------------------------------|---------------------------------|----------------------------|-----------------------------|--------------------|---------|-----------------------|-------------------|----------------------------------------------------------|-----------------------|---------|-----------------------|---------|---------|-----------------------|---------|-----------------------|----------|----------|----------|---------|-----------------------|---------|-----------------------|-----------------------|---------|-----------------------|---------|---------|-----------------------|---------|-----------------------|----------|----------|----------|-------------------------|------|------|------|------|------|------|------|------|------|------|------|------|------|------|------|------|-------|------|------|------|------|-------|------|------|------|-----------------------|------|-------|------|-------|------|------|-------|-------|-------|-------|-------|-------|-------|-------|-------|-------|-------|-------|-------|-------|-------|--------|-------|-------|-------|-------|------|-------|--|--|-------|------|------|------|------|-------|------|------|------|------|------|------|------|------|------|------|-------|------|------|------|------|----------|----|--|--|---|--|----|---|----|----|----|----|------------------|-------|-------------------|-------------------|----|-------------------|----|----|-------------------|--|-------------------|----|----|-----|-----------|------|--|--|--|------|------|-----|------|-----|--|------|------|------|-----|-------|-----|------|------|------|------|--|------|------|------|-----|
| 1                                                                                                                                                                                                                                                                                                                                                                                                                                                                                                                                                                                                                                                                                                                                                                                                                                                                                                                                                                                                                                                                                                                                                                                                                                                                                                                                                                                                                                                                                                                                                                                                                                                                                                                                                                                                                                                                                                                                                                                                                                                                                                                                                                                                                                                                                                                                                                                                                                                                                                 | 21.92  | 83.3    | 10     | 4/25             | K170k          | (R)NPP <del>L</del> A <del>E</del> A <del>L</del> L <del>S</del> G <del>D</del> L <del>E</del> K <del>F</del> S <del>R</del> (V) | 1957.0389                       | 114.0731                   | 14.6                        | 44522.8/4.95       | HUMAN   | Q5TDH0                | 152905            | Protein DDI1 homolog 2 OS=Homo sapiens GN=DDI2 PE=1 SV=1 |                       |         |                       |         |         |                       |         |                       |          |          |          |         |                       |         |                       |                       |         |                       |         |         |                       |         |                       |          |          |          |                         |      |      |      |      |      |      |      |      |      |      |      |      |      |      |      |      |       |      |      |      |      |       |      |      |      |                       |      |       |      |       |      |      |       |       |       |       |       |       |       |       |       |       |       |       |       |       |       |        |       |       |       |       |      |       |  |  |       |      |      |      |      |       |      |      |      |      |      |      |      |      |      |      |       |      |      |      |      |          |    |  |  |   |  |    |   |    |    |    |    |                  |       |                   |                   |    |                   |    |    |                   |  |                   |    |    |     |           |      |  |  |  |      |      |     |      |     |  |      |      |      |     |       |     |      |      |      |      |  |      |      |      |     |
| <table border="1"> <thead> <tr> <th>Fragment-ion (m/z)</th> <th>70.065</th><th>72.081</th><th>84.044</th><th>84.080</th><th>86.096</th><th>102.055</th><th>175.120</th><th>184.109</th><th>212.106</th><th>260.099</th><th>409.218</th><th>576.784<sup>+2</sup></th><th>595.345</th><th>620.671<sup>+3</sup></th><th>633.321<sup>+2</sup></th><th>651.363</th><th>653.031<sup>+3</sup></th><th>780.409</th><th>806.464</th><th>825.443<sup>+2</sup></th><th>892.501</th><th>930.506<sup>+2</sup></th><th>1065.545</th><th>1152.579</th><th>1265.660</th> </tr> </thead> <tbody> <tr> <td>Frac. Inten. (% of TIC)</td> <td>0.01</td><td>4.62</td><td>0.09</td><td>6.63</td><td>0.73</td><td>0.13</td><td>2.30</td><td>6.32</td><td>2.83</td><td>2.26</td><td>3.44</td><td>3.38</td><td>3.00</td><td>5.46</td><td>2.43</td><td>4.42</td><td>12.33</td><td>5.07</td><td>2.91</td><td>3.27</td><td>3.17</td><td>13.30</td><td>3.93</td><td>4.76</td><td>3.23</td> </tr> <tr> <td>Rel. Inten. (% of BP)</td> <td>0.11</td><td>34.72</td><td>0.67</td><td>49.87</td><td>5.45</td><td>0.96</td><td>17.27</td><td>47.50</td><td>21.25</td><td>17.03</td><td>25.89</td><td>25.44</td><td>22.58</td><td>41.07</td><td>18.25</td><td>33.23</td><td>92.75</td><td>38.11</td><td>21.88</td><td>24.57</td><td>23.86</td><td>100.00</td><td>29.54</td><td>35.82</td><td>24.30</td> </tr> <tr> <td>Score</td> <td>0.20</td><td>-0.35</td><td></td><td></td><td>-0.50</td><td>0.22</td><td>1.00</td><td>1.50</td><td>0.50</td><td>-0.17</td><td>1.50</td><td>1.50</td><td>0.75</td><td>1.50</td><td>1.50</td><td>1.50</td><td>1.50</td><td>1.50</td><td>0.50</td><td>1.50</td><td>-0.24</td><td>1.50</td><td>1.50</td><td>1.50</td><td>1.50</td> </tr> <tr> <td>Ion-type</td> <td>PR</td><td></td><td></td><td>E</td><td></td><td>LI</td><td>E</td><td>y1</td><td>a2</td><td>b2</td><td>y3</td><td>y3<sup>+2</sup></td><td>PLAEL</td><td>y16<sup>+3</sup></td><td>y10<sup>+2</sup></td><td>y4</td><td>y17<sup>+3</sup></td><td>y5</td><td>b8</td><td>y14<sup>+2</sup></td><td></td><td>y16<sup>+2</sup></td><td>y8</td><td>y9</td><td>y10</td> </tr> <tr> <td>Delta ppm</td> <td>-4.6</td><td></td><td></td><td></td><td>-0.3</td><td>-2.5</td><td>4.8</td><td>-3.0</td><td>9.1</td><td></td><td>-2.4</td><td>-2.8</td><td>-2.2</td><td>6.1</td><td>-10.5</td><td>9.2</td><td>20.0</td><td>11.4</td><td>27.4</td><td>17.7</td><td></td><td>10.0</td><td>12.1</td><td>12.6</td><td>9.1</td> </tr> </tbody> </table> |        |         |        |                  |                |                                                                                                                                  |                                 |                            |                             |                    |         |                       |                   |                                                          | Fragment-ion (m/z)    | 70.065  | 72.081                | 84.044  | 84.080  | 86.096                | 102.055 | 175.120               | 184.109  | 212.106  | 260.099  | 409.218 | 576.784 <sup>+2</sup> | 595.345 | 620.671 <sup>+3</sup> | 633.321 <sup>+2</sup> | 651.363 | 653.031 <sup>+3</sup> | 780.409 | 806.464 | 825.443 <sup>+2</sup> | 892.501 | 930.506 <sup>+2</sup> | 1065.545 | 1152.579 | 1265.660 | Frac. Inten. (% of TIC) | 0.01 | 4.62 | 0.09 | 6.63 | 0.73 | 0.13 | 2.30 | 6.32 | 2.83 | 2.26 | 3.44 | 3.38 | 3.00 | 5.46 | 2.43 | 4.42 | 12.33 | 5.07 | 2.91 | 3.27 | 3.17 | 13.30 | 3.93 | 4.76 | 3.23 | Rel. Inten. (% of BP) | 0.11 | 34.72 | 0.67 | 49.87 | 5.45 | 0.96 | 17.27 | 47.50 | 21.25 | 17.03 | 25.89 | 25.44 | 22.58 | 41.07 | 18.25 | 33.23 | 92.75 | 38.11 | 21.88 | 24.57 | 23.86 | 100.00 | 29.54 | 35.82 | 24.30 | Score | 0.20 | -0.35 |  |  | -0.50 | 0.22 | 1.00 | 1.50 | 0.50 | -0.17 | 1.50 | 1.50 | 0.75 | 1.50 | 1.50 | 1.50 | 1.50 | 1.50 | 0.50 | 1.50 | -0.24 | 1.50 | 1.50 | 1.50 | 1.50 | Ion-type | PR |  |  | E |  | LI | E | y1 | a2 | b2 | y3 | y3 <sup>+2</sup> | PLAEL | y16 <sup>+3</sup> | y10 <sup>+2</sup> | y4 | y17 <sup>+3</sup> | y5 | b8 | y14 <sup>+2</sup> |  | y16 <sup>+2</sup> | y8 | y9 | y10 | Delta ppm | -4.6 |  |  |  | -0.3 | -2.5 | 4.8 | -3.0 | 9.1 |  | -2.4 | -2.8 | -2.2 | 6.1 | -10.5 | 9.2 | 20.0 | 11.4 | 27.4 | 17.7 |  | 10.0 | 12.1 | 12.6 | 9.1 |
| Fragment-ion (m/z)                                                                                                                                                                                                                                                                                                                                                                                                                                                                                                                                                                                                                                                                                                                                                                                                                                                                                                                                                                                                                                                                                                                                                                                                                                                                                                                                                                                                                                                                                                                                                                                                                                                                                                                                                                                                                                                                                                                                                                                                                                                                                                                                                                                                                                                                                                                                                                                                                                                                                | 70.065 | 72.081  | 84.044 | 84.080           | 86.096         | 102.055                                                                                                                          | 175.120                         | 184.109                    | 212.106                     | 260.099            | 409.218 | 576.784 <sup>+2</sup> | 595.345           | 620.671 <sup>+3</sup>                                    | 633.321 <sup>+2</sup> | 651.363 | 653.031 <sup>+3</sup> | 780.409 | 806.464 | 825.443 <sup>+2</sup> | 892.501 | 930.506 <sup>+2</sup> | 1065.545 | 1152.579 | 1265.660 |         |                       |         |                       |                       |         |                       |         |         |                       |         |                       |          |          |          |                         |      |      |      |      |      |      |      |      |      |      |      |      |      |      |      |      |       |      |      |      |      |       |      |      |      |                       |      |       |      |       |      |      |       |       |       |       |       |       |       |       |       |       |       |       |       |       |       |        |       |       |       |       |      |       |  |  |       |      |      |      |      |       |      |      |      |      |      |      |      |      |      |      |       |      |      |      |      |          |    |  |  |   |  |    |   |    |    |    |    |                  |       |                   |                   |    |                   |    |    |                   |  |                   |    |    |     |           |      |  |  |  |      |      |     |      |     |  |      |      |      |     |       |     |      |      |      |      |  |      |      |      |     |
| Frac. Inten. (% of TIC)                                                                                                                                                                                                                                                                                                                                                                                                                                                                                                                                                                                                                                                                                                                                                                                                                                                                                                                                                                                                                                                                                                                                                                                                                                                                                                                                                                                                                                                                                                                                                                                                                                                                                                                                                                                                                                                                                                                                                                                                                                                                                                                                                                                                                                                                                                                                                                                                                                                                           | 0.01   | 4.62    | 0.09   | 6.63             | 0.73           | 0.13                                                                                                                             | 2.30                            | 6.32                       | 2.83                        | 2.26               | 3.44    | 3.38                  | 3.00              | 5.46                                                     | 2.43                  | 4.42    | 12.33                 | 5.07    | 2.91    | 3.27                  | 3.17    | 13.30                 | 3.93     | 4.76     | 3.23     |         |                       |         |                       |                       |         |                       |         |         |                       |         |                       |          |          |          |                         |      |      |      |      |      |      |      |      |      |      |      |      |      |      |      |      |       |      |      |      |      |       |      |      |      |                       |      |       |      |       |      |      |       |       |       |       |       |       |       |       |       |       |       |       |       |       |       |        |       |       |       |       |      |       |  |  |       |      |      |      |      |       |      |      |      |      |      |      |      |      |      |      |       |      |      |      |      |          |    |  |  |   |  |    |   |    |    |    |    |                  |       |                   |                   |    |                   |    |    |                   |  |                   |    |    |     |           |      |  |  |  |      |      |     |      |     |  |      |      |      |     |       |     |      |      |      |      |  |      |      |      |     |
| Rel. Inten. (% of BP)                                                                                                                                                                                                                                                                                                                                                                                                                                                                                                                                                                                                                                                                                                                                                                                                                                                                                                                                                                                                                                                                                                                                                                                                                                                                                                                                                                                                                                                                                                                                                                                                                                                                                                                                                                                                                                                                                                                                                                                                                                                                                                                                                                                                                                                                                                                                                                                                                                                                             | 0.11   | 34.72   | 0.67   | 49.87            | 5.45           | 0.96                                                                                                                             | 17.27                           | 47.50                      | 21.25                       | 17.03              | 25.89   | 25.44                 | 22.58             | 41.07                                                    | 18.25                 | 33.23   | 92.75                 | 38.11   | 21.88   | 24.57                 | 23.86   | 100.00                | 29.54    | 35.82    | 24.30    |         |                       |         |                       |                       |         |                       |         |         |                       |         |                       |          |          |          |                         |      |      |      |      |      |      |      |      |      |      |      |      |      |      |      |      |       |      |      |      |      |       |      |      |      |                       |      |       |      |       |      |      |       |       |       |       |       |       |       |       |       |       |       |       |       |       |       |        |       |       |       |       |      |       |  |  |       |      |      |      |      |       |      |      |      |      |      |      |      |      |      |      |       |      |      |      |      |          |    |  |  |   |  |    |   |    |    |    |    |                  |       |                   |                   |    |                   |    |    |                   |  |                   |    |    |     |           |      |  |  |  |      |      |     |      |     |  |      |      |      |     |       |     |      |      |      |      |  |      |      |      |     |
| Score                                                                                                                                                                                                                                                                                                                                                                                                                                                                                                                                                                                                                                                                                                                                                                                                                                                                                                                                                                                                                                                                                                                                                                                                                                                                                                                                                                                                                                                                                                                                                                                                                                                                                                                                                                                                                                                                                                                                                                                                                                                                                                                                                                                                                                                                                                                                                                                                                                                                                             | 0.20   | -0.35   |        |                  | -0.50          | 0.22                                                                                                                             | 1.00                            | 1.50                       | 0.50                        | -0.17              | 1.50    | 1.50                  | 0.75              | 1.50                                                     | 1.50                  | 1.50    | 1.50                  | 1.50    | 0.50    | 1.50                  | -0.24   | 1.50                  | 1.50     | 1.50     | 1.50     |         |                       |         |                       |                       |         |                       |         |         |                       |         |                       |          |          |          |                         |      |      |      |      |      |      |      |      |      |      |      |      |      |      |      |      |       |      |      |      |      |       |      |      |      |                       |      |       |      |       |      |      |       |       |       |       |       |       |       |       |       |       |       |       |       |       |       |        |       |       |       |       |      |       |  |  |       |      |      |      |      |       |      |      |      |      |      |      |      |      |      |      |       |      |      |      |      |          |    |  |  |   |  |    |   |    |    |    |    |                  |       |                   |                   |    |                   |    |    |                   |  |                   |    |    |     |           |      |  |  |  |      |      |     |      |     |  |      |      |      |     |       |     |      |      |      |      |  |      |      |      |     |
| Ion-type                                                                                                                                                                                                                                                                                                                                                                                                                                                                                                                                                                                                                                                                                                                                                                                                                                                                                                                                                                                                                                                                                                                                                                                                                                                                                                                                                                                                                                                                                                                                                                                                                                                                                                                                                                                                                                                                                                                                                                                                                                                                                                                                                                                                                                                                                                                                                                                                                                                                                          | PR     |         |        | E                |                | LI                                                                                                                               | E                               | y1                         | a2                          | b2                 | y3      | y3 <sup>+2</sup>      | PLAEL             | y16 <sup>+3</sup>                                        | y10 <sup>+2</sup>     | y4      | y17 <sup>+3</sup>     | y5      | b8      | y14 <sup>+2</sup>     |         | y16 <sup>+2</sup>     | y8       | y9       | y10      |         |                       |         |                       |                       |         |                       |         |         |                       |         |                       |          |          |          |                         |      |      |      |      |      |      |      |      |      |      |      |      |      |      |      |      |       |      |      |      |      |       |      |      |      |                       |      |       |      |       |      |      |       |       |       |       |       |       |       |       |       |       |       |       |       |       |       |        |       |       |       |       |      |       |  |  |       |      |      |      |      |       |      |      |      |      |      |      |      |      |      |      |       |      |      |      |      |          |    |  |  |   |  |    |   |    |    |    |    |                  |       |                   |                   |    |                   |    |    |                   |  |                   |    |    |     |           |      |  |  |  |      |      |     |      |     |  |      |      |      |     |       |     |      |      |      |      |  |      |      |      |     |
| Delta ppm                                                                                                                                                                                                                                                                                                                                                                                                                                                                                                                                                                                                                                                                                                                                                                                                                                                                                                                                                                                                                                                                                                                                                                                                                                                                                                                                                                                                                                                                                                                                                                                                                                                                                                                                                                                                                                                                                                                                                                                                                                                                                                                                                                                                                                                                                                                                                                                                                                                                                         | -4.6   |         |        |                  | -0.3           | -2.5                                                                                                                             | 4.8                             | -3.0                       | 9.1                         |                    | -2.4    | -2.8                  | -2.2              | 6.1                                                      | -10.5                 | 9.2     | 20.0                  | 11.4    | 27.4    | 17.7                  |         | 10.0                  | 12.1     | 12.6     | 9.1      |         |                       |         |                       |                       |         |                       |         |         |                       |         |                       |          |          |          |                         |      |      |      |      |      |      |      |      |      |      |      |      |      |      |      |      |       |      |      |      |      |       |      |      |      |                       |      |       |      |       |      |      |       |       |       |       |       |       |       |       |       |       |       |       |       |       |       |        |       |       |       |       |      |       |  |  |       |      |      |      |      |       |      |      |      |      |      |      |      |      |      |      |       |      |      |      |      |          |    |  |  |   |  |    |   |    |    |    |    |                  |       |                   |                   |    |                   |    |    |                   |  |                   |    |    |     |           |      |  |  |  |      |      |     |      |     |  |      |      |      |     |       |     |      |      |      |      |  |      |      |      |     |

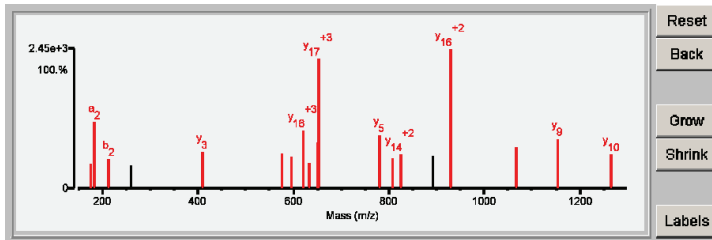

Result Summary

| Rank | Score | SPI (%) | BCS | # Unmatched Ions | Variable sites | Sequence                 | MH <sup>+</sup> Calculated (Da) | MH <sup>+</sup> Error (Da) | MH <sup>+</sup> Error (ppm) | Protein MW/pl (Da) | Species | Accession # | Protein Name                                       |
|------|-------|---------|-----|------------------|----------------|--------------------------|---------------------------------|----------------------------|-----------------------------|--------------------|---------|-------------|----------------------------------------------------|
| 1    | 10.29 | 66.3    | 5   | 8/25             | K325k          | (R)GGRPNEIEPPPEMPWQkR(Q) | 2312.1604                       | 114.0737                   | 12.7                        | 55401.0/9.15       | HUMAN   | Q8NCAS      | Protein FAM98A OS=Homo sapiens GN=FAM98A PE=1 SV=1 |

Detailed Results

| Rank                   | Score  | SPI (%) | BCS    | # Unmatched Ions | Variable sites | Sequence                 | MH <sup>+</sup> Calculated (Da) | MH <sup>+</sup> Error (Da) | MH <sup>+</sup> Error (ppm) | Protein MW/pl (Da) | Species | Accession #           | MS-Digest Index # | Protein Name                                       |                       |         |                |         |                               |                |         |                               |                |                |                |
|------------------------|--------|---------|--------|------------------|----------------|--------------------------|---------------------------------|----------------------------|-----------------------------|--------------------|---------|-----------------------|-------------------|----------------------------------------------------|-----------------------|---------|----------------|---------|-------------------------------|----------------|---------|-------------------------------|----------------|----------------|----------------|
| 1                      | 10.29  | 66.3    | 5      | 8/25             | K325k          | (R)GGRPNEIEPPPEMPWQkR(Q) | 2312.1604                       | 114.0737                   | 12.7                        | 55401.0/9.15       | HUMAN   | Q8NCAS                | 205169            | Protein FAM98A OS=Homo sapiens GN=FAM98A PE=1 SV=1 |                       |         |                |         |                               |                |         |                               |                |                |                |
| Fragment-ion (m/z)     | 70.066 | 72.082  | 84.044 | 86.096           | 87.053         | 102.051                  | 104.054                         | 159.102                    | 227.104                     | 324.150            | 355.161 | 357.199 <sup>+2</sup> | 419.234           | 427.200                                            | 463.257 <sup>+2</sup> | 479.230 | 583.293        | 648.277 | 690.361 <sup>+2</sup>         | 724.359        | 739.389 | 787.409 <sup>+2</sup>         | 828.448        | 853.438        | 925.504        |
| Frac. Inten.(% of TIC) | 0.00   | 9.26    | 0.10   | 0.53             | 3.35           | 0.14                     | 3.21                            | 3.20                       | 5.10                        | 3.10               | 3.29    | 4.11                  | 3.56              | 2.96                                               | 6.82                  | 3.03    | 4.64           | 3.99    | 6.75                          | 3.63           | 4.86    | 8.20                          | 3.67           | 5.85           | 6.66           |
| Rel. Inten.(% of BP)   | 0.01   | 100.00  | 1.07   | 5.69             | 36.17          | 1.55                     | 34.70                           | 34.62                      | 55.11                       | 33.45              | 35.60   | 44.38                 | 38.51             | 31.93                                              | 73.70                 | 32.72   | 50.14          | 43.07   | 72.91                         | 39.27          | 52.50   | 88.64                         | 39.62          | 63.15          | 71.90          |
| Score                  | 0.20   | -1.00   |        | 0.22             | 0.50           | 1.00                     | -0.35                           | -0.35                      | 0.75                        | 0.75               | -0.36   | -0.44                 | -0.39             | 0.50                                               | 1.50                  | -0.33   | 0.75           | 0.75    | 1.50                          | 0.50           | 0.75    | 1.50                          | 1.50           | 0.50           | 1.50           |
| Ion-type               | PR     |         | E      | LJ               | 82             | E                        |                                 |                            | PE                          | PPE                |         |                       |                   | b <sup>+</sup> a <sup>+</sup>                      | a <sup>+</sup>        |         | a <sup>+</sup> |         | y <sub>10</sub> <sup>+2</sup> | b <sup>+</sup> | RPNEIE  | y <sub>12</sub> <sup>+2</sup> | y <sub>5</sub> | b <sup>+</sup> | y <sub>6</sub> |
| Delta ppm              | 13.9   |         |        | -3.8             | -36.6          | -39.7                    |                                 |                            | 2.9                         | -21.3              |         |                       |                   | -29.5                                              | 6.6                   |         |                |         | 19.5                          | -21.2          | 19.6    | 10.8                          | 0.2            | 24.7           | 3.5            |

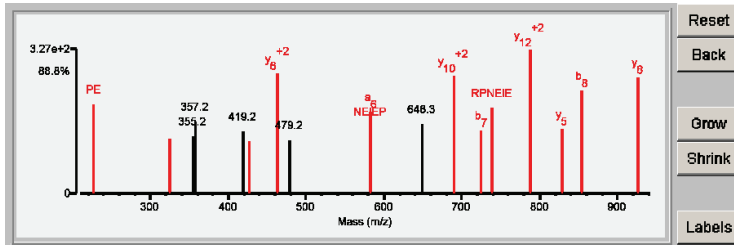



Result Summary

| Rank | Score | SPI (%) | BCS | # Unmatched Ions | Variable sites | Sequence                                                      | MH <sup>+</sup> Calculated (Da) | MH <sup>+</sup> Error (Da) | MH <sup>+</sup> Error (ppm) | Protein MW/pI (Da) | Species | Accession #            | Protein Name                                   |
|------|-------|---------|-----|------------------|----------------|---------------------------------------------------------------|---------------------------------|----------------------------|-----------------------------|--------------------|---------|------------------------|------------------------------------------------|
| 1    | 12.54 | 60.0    | 8   | 9/25             | K377k          | (R) <u>L</u> V <u>K</u> L <u>F</u> D <u>F</u> P <u>G</u> R(G) | 1191.6885                       | 114.0528                   | 7.6                         | 56084.8/9.02       | HUMAN   | <a href="#">Q9P258</a> | Protein RCC2 OS=Homo sapiens GN=RCC2 PE=1 SV=2 |

Detailed Results

| Rank | Score | SPI (%) | BCS | # Unmatched Ions | Variable sites | Sequence                                                      | MH <sup>+</sup> Calculated (Da) | MH <sup>+</sup> Error (Da) | MH <sup>+</sup> Error (ppm) | Protein MW/pI (Da) | Species | Accession #            | MS-Digest Index #      | Protein Name                                   |
|------|-------|---------|-----|------------------|----------------|---------------------------------------------------------------|---------------------------------|----------------------------|-----------------------------|--------------------|---------|------------------------|------------------------|------------------------------------------------|
| 1    | 12.54 | 60.0    | 8   | 9/25             | K377k          | (R) <u>L</u> V <u>K</u> L <u>F</u> D <u>F</u> P <u>G</u> R(G) | 1191.6885                       | 114.0528                   | 7.6                         | 56084.8/9.02       | HUMAN   | <a href="#">Q9P258</a> | <a href="#">562483</a> | Protein RCC2 OS=Homo sapiens GN=RCC2 PE=1 SV=2 |

  

| Fragment-ion (m/z)      | 70.065 | 72.081 | 84.079 | 86.095 | 120.080 | 129.099 | 130.079 | 158.089 | 175.118 | 185.165 | 199.646 | 213.158 | 232.134 | 312.164 <sup>+2</sup> | 315.724 <sup>+2</sup> | 329.192 | 340.180 | 356.219 | 359.132 | 370.207 | 455.305 | 476.259 | 504.259 | 591.283 | 738.354 |
|-------------------------|--------|--------|--------|--------|---------|---------|---------|---------|---------|---------|---------|---------|---------|-----------------------|-----------------------|---------|---------|---------|---------|---------|---------|---------|---------|---------|---------|
| Frac. Inten. (% of TIC) | 0.01   | 0.08   | 21.46  | 16.89  | 0.46    | 0.06    | 3.38    | 2.41    | 7.41    | 2.18    | 2.41    | 2.34    | 2.36    | 2.70                  | 2.15                  | 7.75    | 2.06    | 2.80    | 1.97    | 1.93    | 2.08    | 8.13    | 1.91    | 2.38    | 2.67    |
| Rel. Inten. (% of BP)   | 0.05   | 0.39   | 100.00 | 78.70  | 2.16    | 0.29    | 15.75   | 11.22   | 34.51   | 10.14   | 11.22   | 10.88   | 11.01   | 12.60                 | 10.03                 | 36.12   | 9.61    | 13.04   | 9.18    | 8.98    | 9.71    | 37.90   | 8.92    | 11.11   | 12.45   |
| Score                   | 0.20   | 0.50   | -1.00  | 0.50   | 1.00    | 0.20    | -0.16   | 0.50    | 1.50    | 0.50    | -0.11   | 0.50    | 1.50    | -0.13                 | -0.10                 | 1.50    | -0.10   | 0.75    | -0.09   | -0.09   | 0.75    | 1.50    | -0.09   | 1.50    | 1.50    |
| Ion-type                | PR     | V      |        | a1     | F       | RKQ     |         | y1-NH3  | y1      | a2      |         | b2      | y2      |                       |                       | y3      |         | kL      |         |         | b3      | y4      | y5      | y6      |         |
| Delta ppm               | 2.5    | 7.3    |        | -29.3  | -7.3    | -29.0   |         | -22.8   | -7.1    | -6.7    |         | -12.9   | -25.9   |                       |                       | -3.0    |         | -32.4   |         |         | 12.9    | -4.6    | -10.2   | -4.3    |         |

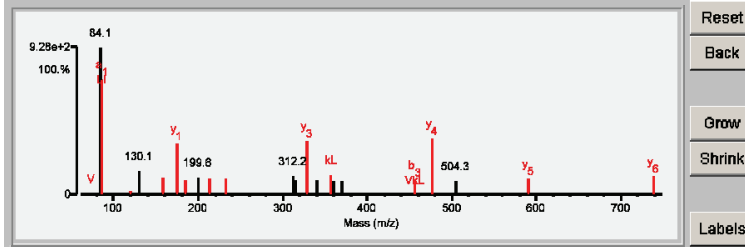

Reset

Back

Grow

Shrink

Labels

Result Summary

| Rank | Score | SP1 (%) | BCS | Unmatched Ions | # Variable sites | Sequence                    | MH <sup>+</sup> Calculated (Da) | MH <sup>+</sup> Error (Da) | MH <sup>+</sup> Error (ppm) | Protein MW/pl (Da) | Species | Accession # | Protein Name                                                         |
|------|-------|---------|-----|----------------|------------------|-----------------------------|---------------------------------|----------------------------|-----------------------------|--------------------|---------|-------------|----------------------------------------------------------------------|
| 1    | 23.86 | 94.7    | 10  | 2/25           | K37k             | (R)VLMEKEFPGFLENQKDLAVDK(I) | 2547.3163                       | 114.0670                   | 9.1                         | 11203.2/6.82       | HUMAN   | P60903      | Protein S100-A10 OS=Homo sapiens GN=S100A10 PE=1 SV=2                |
| 2    | 11.95 | 75.2    | 6   | 10/25          | K47k             | (R)VLMEKEFPGFLENQKDLAVDK(I) | 2547.3163                       | 114.0670                   | 9.1                         | 11203.2/6.82       | HUMAN   | P60903      | Protein S100-A10 OS=Homo sapiens GN=S100A10 PE=1 SV=2                |
| 3    | 6.08  | 64.7    | 2   | 13/25          | K54k             | (R)VLMEKEFPGFLENQKDLAVDK(I) | 2547.3163                       | 114.0670                   | 9.1                         | 11203.2/6.82       | HUMAN   | P60903      | Protein S100-A10 OS=Homo sapiens GN=S100A10 PE=1 SV=2                |
| 4    | 5.81  | 68.8    | 3   | 15/25          | K3601k K3604k    | (K)VLHPDMAKVPASPATKMMQR(S)  | 2433.2927                       | 228.0906                   | 1.8                         | 566659.8/6.12      | HUMAN   | Q9Y6V0      | Protein piccolo OS=Homo sapiens GN=PLO PE=1 SV=3                     |
| 5    | 5.54  | 55.7    | 1   | 14/25          | M383m            | (R)TNMQRTSRKSPNIVHCEAFK(E)  | 2645.3763                       | 16.0071                    | 4.6                         | 64118.2/4.96       | HUMAN   | RQ9Y4X5     | REVERSE Protein ariadne-1 homolog OS=Homo sapiens GN=ARIH1 PE=1 SV=2 |

Detailed Results

| Rank                                                                                                                                                                                                                                                                                                                                                                                                                                                                                                                                                                                                                                                                                                                                                                                                                                                                                                                                                                                                                                                                                                                                                                                                                                                                                                                                                                                                                                                                                                                                                                                                                                                                                                                                                                                                                                                                                                                                                                                                                                                                                                                                                                                                                                                                                                                                                                                                                                                                                                                                                                                                                                                                                                                                           | Score  | SP1 (%) | BCS    | Unmatched Ions | # Variable sites | Sequence                    | MH <sup>+</sup> Calculated (Da) | MH <sup>+</sup> Error (Da) | MH <sup>+</sup> Error (ppm) | Protein MW/pl (Da) | Species | Accession #   | MS-Digest Index # | Protein Name                                          |                       |                       |         |                       |                       |                       |                       |                       |                       |                       |         |         |         |         |         |                       |                       |         |                       |                       |                       |                       |                       |                       |                       |         |                         |      |      |      |      |      |       |      |      |      |      |      |      |      |      |       |      |      |      |      |      |      |       |      |      |      |                       |      |      |      |      |      |       |       |       |       |       |       |       |       |       |       |       |       |       |       |       |       |        |       |       |       |       |      |      |      |      |      |      |      |      |      |      |      |      |      |      |      |      |      |      |      |      |      |      |      |      |      |          |    |    |    |    |   |    |    |    |    |     |    |    |     |     |                   |                   |    |                   |  |                   |                   |                   |                   |                   |    |           |     |       |      |      |      |      |      |     |     |      |     |     |      |         |     |      |      |      |  |      |      |     |      |     |       |
|------------------------------------------------------------------------------------------------------------------------------------------------------------------------------------------------------------------------------------------------------------------------------------------------------------------------------------------------------------------------------------------------------------------------------------------------------------------------------------------------------------------------------------------------------------------------------------------------------------------------------------------------------------------------------------------------------------------------------------------------------------------------------------------------------------------------------------------------------------------------------------------------------------------------------------------------------------------------------------------------------------------------------------------------------------------------------------------------------------------------------------------------------------------------------------------------------------------------------------------------------------------------------------------------------------------------------------------------------------------------------------------------------------------------------------------------------------------------------------------------------------------------------------------------------------------------------------------------------------------------------------------------------------------------------------------------------------------------------------------------------------------------------------------------------------------------------------------------------------------------------------------------------------------------------------------------------------------------------------------------------------------------------------------------------------------------------------------------------------------------------------------------------------------------------------------------------------------------------------------------------------------------------------------------------------------------------------------------------------------------------------------------------------------------------------------------------------------------------------------------------------------------------------------------------------------------------------------------------------------------------------------------------------------------------------------------------------------------------------------------|--------|---------|--------|----------------|------------------|-----------------------------|---------------------------------|----------------------------|-----------------------------|--------------------|---------|---------------|-------------------|-------------------------------------------------------|-----------------------|-----------------------|---------|-----------------------|-----------------------|-----------------------|-----------------------|-----------------------|-----------------------|-----------------------|---------|---------|---------|---------|---------|-----------------------|-----------------------|---------|-----------------------|-----------------------|-----------------------|-----------------------|-----------------------|-----------------------|-----------------------|---------|-------------------------|------|------|------|------|------|-------|------|------|------|------|------|------|------|------|-------|------|------|------|------|------|------|-------|------|------|------|-----------------------|------|------|------|------|------|-------|-------|-------|-------|-------|-------|-------|-------|-------|-------|-------|-------|-------|-------|-------|-------|--------|-------|-------|-------|-------|------|------|------|------|------|------|------|------|------|------|------|------|------|------|------|------|------|------|------|------|------|------|------|------|------|----------|----|----|----|----|---|----|----|----|----|-----|----|----|-----|-----|-------------------|-------------------|----|-------------------|--|-------------------|-------------------|-------------------|-------------------|-------------------|----|-----------|-----|-------|------|------|------|------|------|-----|-----|------|-----|-----|------|---------|-----|------|------|------|--|------|------|-----|------|-----|-------|
| 1                                                                                                                                                                                                                                                                                                                                                                                                                                                                                                                                                                                                                                                                                                                                                                                                                                                                                                                                                                                                                                                                                                                                                                                                                                                                                                                                                                                                                                                                                                                                                                                                                                                                                                                                                                                                                                                                                                                                                                                                                                                                                                                                                                                                                                                                                                                                                                                                                                                                                                                                                                                                                                                                                                                                              | 23.86  | 94.7    | 10     | 2/25           | K37k             | (R)VLMEKEFPGFLENQKDLAVDK(I) | 2547.3163                       | 114.0670                   | 9.1                         | 11203.2/6.82       | HUMAN   | P60903 704043 |                   | Protein S100-A10 OS=Homo sapiens GN=S100A10 PE=1 SV=2 |                       |                       |         |                       |                       |                       |                       |                       |                       |                       |         |         |         |         |         |                       |                       |         |                       |                       |                       |                       |                       |                       |                       |         |                         |      |      |      |      |      |       |      |      |      |      |      |      |      |      |       |      |      |      |      |      |      |       |      |      |      |                       |      |      |      |      |      |       |       |       |       |       |       |       |       |       |       |       |       |       |       |       |       |        |       |       |       |       |      |      |      |      |      |      |      |      |      |      |      |      |      |      |      |      |      |      |      |      |      |      |      |      |      |          |    |    |    |    |   |    |    |    |    |     |    |    |     |     |                   |                   |    |                   |  |                   |                   |                   |                   |                   |    |           |     |       |      |      |      |      |      |     |     |      |     |     |      |         |     |      |      |      |  |      |      |     |      |     |       |
| <table border="1"> <thead> <tr> <th>Fragment-ion (m/z)</th> <th>70.066</th> <th>72.080</th> <th>84.081</th> <th>86.096</th> <th>120.080</th> <th>185.165</th> <th>213.158</th> <th>262.142</th> <th>361.209</th> <th>372.195</th> <th>396.204</th> <th>432.249</th> <th>501.244</th> <th>519.258</th> <th>557.633<sup>+3</sup></th> <th>606.663<sup>+3</sup></th> <th>642.382</th> <th>730.399<sup>+3</sup></th> <th>758.410<sup>+2</sup></th> <th>787.424<sup>+2</sup></th> <th>817.090<sup>+3</sup></th> <th>835.948<sup>+2</sup></th> <th>909.485<sup>+2</sup></th> <th>974.002<sup>+2</sup></th> <th>991.477</th> </tr> </thead> <tbody> <tr> <td>Frac. Inten. (% of TIC)</td> <td>0.00</td> <td>0.32</td> <td>0.24</td> <td>0.31</td> <td>0.24</td> <td>10.58</td> <td>4.99</td> <td>4.07</td> <td>2.36</td> <td>2.34</td> <td>2.96</td> <td>2.23</td> <td>3.35</td> <td>2.30</td> <td>12.92</td> <td>2.64</td> <td>5.29</td> <td>2.51</td> <td>2.89</td> <td>3.19</td> <td>7.98</td> <td>18.60</td> <td>2.67</td> <td>2.81</td> <td>2.21</td> </tr> <tr> <td>Rel. Inten. (% of BP)</td> <td>0.02</td> <td>1.72</td> <td>1.29</td> <td>1.64</td> <td>1.29</td> <td>56.87</td> <td>26.82</td> <td>21.90</td> <td>12.68</td> <td>12.59</td> <td>15.94</td> <td>11.99</td> <td>17.99</td> <td>12.36</td> <td>69.49</td> <td>14.22</td> <td>28.46</td> <td>13.52</td> <td>15.52</td> <td>17.17</td> <td>42.92</td> <td>100.00</td> <td>14.36</td> <td>15.11</td> <td>11.87</td> </tr> <tr> <td>Score</td> <td>0.20</td> <td>0.50</td> <td>0.50</td> <td>0.22</td> <td>1.00</td> <td>0.50</td> <td>1.50</td> <td>1.50</td> <td>0.75</td> <td>0.75</td> <td>1.50</td> <td>0.75</td> <td>0.75</td> <td>0.75</td> <td>1.50</td> <td>0.50</td> </tr> <tr> <td>Ion-type</td> <td>PR</td> <td>a1</td> <td>KQ</td> <td>LI</td> <td>F</td> <td>a2</td> <td>b2</td> <td>y2</td> <td>y3</td> <td>QKD</td> <td>y4</td> <td>y4</td> <td>KEF</td> <td>KEF</td> <td>y15<sup>+3</sup></td> <td>y16<sup>+3</sup></td> <td>y6</td> <td>y18<sup>+3</sup></td> <td></td> <td>y14<sup>+2</sup></td> <td>y20<sup>+3</sup></td> <td>y15<sup>+2</sup></td> <td>y16<sup>+2</sup></td> <td>y17<sup>+2</sup></td> <td>b7</td> </tr> <tr> <td>Delta ppm</td> <td>6.8</td> <td>-12.1</td> <td>-3.3</td> <td>-2.6</td> <td>-8.1</td> <td>-0.2</td> <td>-6.4</td> <td>9.7</td> <td>1.5</td> <td>19.5</td> <td>9.5</td> <td>9.5</td> <td>27.0</td> <td>KEF-H2O</td> <td>5.2</td> <td>17.5</td> <td>-0.3</td> <td>27.4</td> <td></td> <td>11.5</td> <td>19.7</td> <td>7.6</td> <td>10.8</td> <td>5.2</td> <td>-14.4</td> </tr> </tbody> </table> |        |         |        |                |                  |                             |                                 |                            |                             |                    |         |               |                   |                                                       | Fragment-ion (m/z)    | 70.066                | 72.080  | 84.081                | 86.096                | 120.080               | 185.165               | 213.158               | 262.142               | 361.209               | 372.195 | 396.204 | 432.249 | 501.244 | 519.258 | 557.633 <sup>+3</sup> | 606.663 <sup>+3</sup> | 642.382 | 730.399 <sup>+3</sup> | 758.410 <sup>+2</sup> | 787.424 <sup>+2</sup> | 817.090 <sup>+3</sup> | 835.948 <sup>+2</sup> | 909.485 <sup>+2</sup> | 974.002 <sup>+2</sup> | 991.477 | Frac. Inten. (% of TIC) | 0.00 | 0.32 | 0.24 | 0.31 | 0.24 | 10.58 | 4.99 | 4.07 | 2.36 | 2.34 | 2.96 | 2.23 | 3.35 | 2.30 | 12.92 | 2.64 | 5.29 | 2.51 | 2.89 | 3.19 | 7.98 | 18.60 | 2.67 | 2.81 | 2.21 | Rel. Inten. (% of BP) | 0.02 | 1.72 | 1.29 | 1.64 | 1.29 | 56.87 | 26.82 | 21.90 | 12.68 | 12.59 | 15.94 | 11.99 | 17.99 | 12.36 | 69.49 | 14.22 | 28.46 | 13.52 | 15.52 | 17.17 | 42.92 | 100.00 | 14.36 | 15.11 | 11.87 | Score | 0.20 | 0.50 | 0.50 | 0.22 | 1.00 | 0.50 | 1.50 | 1.50 | 0.75 | 0.75 | 1.50 | 0.75 | 0.75 | 0.75 | 1.50 | 1.50 | 1.50 | 1.50 | 1.50 | 1.50 | 1.50 | 1.50 | 1.50 | 1.50 | 0.50 | Ion-type | PR | a1 | KQ | LI | F | a2 | b2 | y2 | y3 | QKD | y4 | y4 | KEF | KEF | y15 <sup>+3</sup> | y16 <sup>+3</sup> | y6 | y18 <sup>+3</sup> |  | y14 <sup>+2</sup> | y20 <sup>+3</sup> | y15 <sup>+2</sup> | y16 <sup>+2</sup> | y17 <sup>+2</sup> | b7 | Delta ppm | 6.8 | -12.1 | -3.3 | -2.6 | -8.1 | -0.2 | -6.4 | 9.7 | 1.5 | 19.5 | 9.5 | 9.5 | 27.0 | KEF-H2O | 5.2 | 17.5 | -0.3 | 27.4 |  | 11.5 | 19.7 | 7.6 | 10.8 | 5.2 | -14.4 |
| Fragment-ion (m/z)                                                                                                                                                                                                                                                                                                                                                                                                                                                                                                                                                                                                                                                                                                                                                                                                                                                                                                                                                                                                                                                                                                                                                                                                                                                                                                                                                                                                                                                                                                                                                                                                                                                                                                                                                                                                                                                                                                                                                                                                                                                                                                                                                                                                                                                                                                                                                                                                                                                                                                                                                                                                                                                                                                                             | 70.066 | 72.080  | 84.081 | 86.096         | 120.080          | 185.165                     | 213.158                         | 262.142                    | 361.209                     | 372.195            | 396.204 | 432.249       | 501.244           | 519.258                                               | 557.633 <sup>+3</sup> | 606.663 <sup>+3</sup> | 642.382 | 730.399 <sup>+3</sup> | 758.410 <sup>+2</sup> | 787.424 <sup>+2</sup> | 817.090 <sup>+3</sup> | 835.948 <sup>+2</sup> | 909.485 <sup>+2</sup> | 974.002 <sup>+2</sup> | 991.477 |         |         |         |         |                       |                       |         |                       |                       |                       |                       |                       |                       |                       |         |                         |      |      |      |      |      |       |      |      |      |      |      |      |      |      |       |      |      |      |      |      |      |       |      |      |      |                       |      |      |      |      |      |       |       |       |       |       |       |       |       |       |       |       |       |       |       |       |       |        |       |       |       |       |      |      |      |      |      |      |      |      |      |      |      |      |      |      |      |      |      |      |      |      |      |      |      |      |      |          |    |    |    |    |   |    |    |    |    |     |    |    |     |     |                   |                   |    |                   |  |                   |                   |                   |                   |                   |    |           |     |       |      |      |      |      |      |     |     |      |     |     |      |         |     |      |      |      |  |      |      |     |      |     |       |
| Frac. Inten. (% of TIC)                                                                                                                                                                                                                                                                                                                                                                                                                                                                                                                                                                                                                                                                                                                                                                                                                                                                                                                                                                                                                                                                                                                                                                                                                                                                                                                                                                                                                                                                                                                                                                                                                                                                                                                                                                                                                                                                                                                                                                                                                                                                                                                                                                                                                                                                                                                                                                                                                                                                                                                                                                                                                                                                                                                        | 0.00   | 0.32    | 0.24   | 0.31           | 0.24             | 10.58                       | 4.99                            | 4.07                       | 2.36                        | 2.34               | 2.96    | 2.23          | 3.35              | 2.30                                                  | 12.92                 | 2.64                  | 5.29    | 2.51                  | 2.89                  | 3.19                  | 7.98                  | 18.60                 | 2.67                  | 2.81                  | 2.21    |         |         |         |         |                       |                       |         |                       |                       |                       |                       |                       |                       |                       |         |                         |      |      |      |      |      |       |      |      |      |      |      |      |      |      |       |      |      |      |      |      |      |       |      |      |      |                       |      |      |      |      |      |       |       |       |       |       |       |       |       |       |       |       |       |       |       |       |       |        |       |       |       |       |      |      |      |      |      |      |      |      |      |      |      |      |      |      |      |      |      |      |      |      |      |      |      |      |      |          |    |    |    |    |   |    |    |    |    |     |    |    |     |     |                   |                   |    |                   |  |                   |                   |                   |                   |                   |    |           |     |       |      |      |      |      |      |     |     |      |     |     |      |         |     |      |      |      |  |      |      |     |      |     |       |
| Rel. Inten. (% of BP)                                                                                                                                                                                                                                                                                                                                                                                                                                                                                                                                                                                                                                                                                                                                                                                                                                                                                                                                                                                                                                                                                                                                                                                                                                                                                                                                                                                                                                                                                                                                                                                                                                                                                                                                                                                                                                                                                                                                                                                                                                                                                                                                                                                                                                                                                                                                                                                                                                                                                                                                                                                                                                                                                                                          | 0.02   | 1.72    | 1.29   | 1.64           | 1.29             | 56.87                       | 26.82                           | 21.90                      | 12.68                       | 12.59              | 15.94   | 11.99         | 17.99             | 12.36                                                 | 69.49                 | 14.22                 | 28.46   | 13.52                 | 15.52                 | 17.17                 | 42.92                 | 100.00                | 14.36                 | 15.11                 | 11.87   |         |         |         |         |                       |                       |         |                       |                       |                       |                       |                       |                       |                       |         |                         |      |      |      |      |      |       |      |      |      |      |      |      |      |      |       |      |      |      |      |      |      |       |      |      |      |                       |      |      |      |      |      |       |       |       |       |       |       |       |       |       |       |       |       |       |       |       |       |        |       |       |       |       |      |      |      |      |      |      |      |      |      |      |      |      |      |      |      |      |      |      |      |      |      |      |      |      |      |          |    |    |    |    |   |    |    |    |    |     |    |    |     |     |                   |                   |    |                   |  |                   |                   |                   |                   |                   |    |           |     |       |      |      |      |      |      |     |     |      |     |     |      |         |     |      |      |      |  |      |      |     |      |     |       |
| Score                                                                                                                                                                                                                                                                                                                                                                                                                                                                                                                                                                                                                                                                                                                                                                                                                                                                                                                                                                                                                                                                                                                                                                                                                                                                                                                                                                                                                                                                                                                                                                                                                                                                                                                                                                                                                                                                                                                                                                                                                                                                                                                                                                                                                                                                                                                                                                                                                                                                                                                                                                                                                                                                                                                                          | 0.20   | 0.50    | 0.50   | 0.22           | 1.00             | 0.50                        | 1.50                            | 1.50                       | 0.75                        | 0.75               | 1.50    | 0.75          | 0.75              | 0.75                                                  | 1.50                  | 1.50                  | 1.50    | 1.50                  | 1.50                  | 1.50                  | 1.50                  | 1.50                  | 1.50                  | 1.50                  | 0.50    |         |         |         |         |                       |                       |         |                       |                       |                       |                       |                       |                       |                       |         |                         |      |      |      |      |      |       |      |      |      |      |      |      |      |      |       |      |      |      |      |      |      |       |      |      |      |                       |      |      |      |      |      |       |       |       |       |       |       |       |       |       |       |       |       |       |       |       |       |        |       |       |       |       |      |      |      |      |      |      |      |      |      |      |      |      |      |      |      |      |      |      |      |      |      |      |      |      |      |          |    |    |    |    |   |    |    |    |    |     |    |    |     |     |                   |                   |    |                   |  |                   |                   |                   |                   |                   |    |           |     |       |      |      |      |      |      |     |     |      |     |     |      |         |     |      |      |      |  |      |      |     |      |     |       |
| Ion-type                                                                                                                                                                                                                                                                                                                                                                                                                                                                                                                                                                                                                                                                                                                                                                                                                                                                                                                                                                                                                                                                                                                                                                                                                                                                                                                                                                                                                                                                                                                                                                                                                                                                                                                                                                                                                                                                                                                                                                                                                                                                                                                                                                                                                                                                                                                                                                                                                                                                                                                                                                                                                                                                                                                                       | PR     | a1      | KQ     | LI             | F                | a2                          | b2                              | y2                         | y3                          | QKD                | y4      | y4            | KEF               | KEF                                                   | y15 <sup>+3</sup>     | y16 <sup>+3</sup>     | y6      | y18 <sup>+3</sup>     |                       | y14 <sup>+2</sup>     | y20 <sup>+3</sup>     | y15 <sup>+2</sup>     | y16 <sup>+2</sup>     | y17 <sup>+2</sup>     | b7      |         |         |         |         |                       |                       |         |                       |                       |                       |                       |                       |                       |                       |         |                         |      |      |      |      |      |       |      |      |      |      |      |      |      |      |       |      |      |      |      |      |      |       |      |      |      |                       |      |      |      |      |      |       |       |       |       |       |       |       |       |       |       |       |       |       |       |       |       |        |       |       |       |       |      |      |      |      |      |      |      |      |      |      |      |      |      |      |      |      |      |      |      |      |      |      |      |      |      |          |    |    |    |    |   |    |    |    |    |     |    |    |     |     |                   |                   |    |                   |  |                   |                   |                   |                   |                   |    |           |     |       |      |      |      |      |      |     |     |      |     |     |      |         |     |      |      |      |  |      |      |     |      |     |       |
| Delta ppm                                                                                                                                                                                                                                                                                                                                                                                                                                                                                                                                                                                                                                                                                                                                                                                                                                                                                                                                                                                                                                                                                                                                                                                                                                                                                                                                                                                                                                                                                                                                                                                                                                                                                                                                                                                                                                                                                                                                                                                                                                                                                                                                                                                                                                                                                                                                                                                                                                                                                                                                                                                                                                                                                                                                      | 6.8    | -12.1   | -3.3   | -2.6           | -8.1             | -0.2                        | -6.4                            | 9.7                        | 1.5                         | 19.5               | 9.5     | 9.5           | 27.0              | KEF-H2O                                               | 5.2                   | 17.5                  | -0.3    | 27.4                  |                       | 11.5                  | 19.7                  | 7.6                   | 10.8                  | 5.2                   | -14.4   |         |         |         |         |                       |                       |         |                       |                       |                       |                       |                       |                       |                       |         |                         |      |      |      |      |      |       |      |      |      |      |      |      |      |      |       |      |      |      |      |      |      |       |      |      |      |                       |      |      |      |      |      |       |       |       |       |       |       |       |       |       |       |       |       |       |       |       |       |        |       |       |       |       |      |      |      |      |      |      |      |      |      |      |      |      |      |      |      |      |      |      |      |      |      |      |      |      |      |          |    |    |    |    |   |    |    |    |    |     |    |    |     |     |                   |                   |    |                   |  |                   |                   |                   |                   |                   |    |           |     |       |      |      |      |      |      |     |     |      |     |     |      |         |     |      |      |      |  |      |      |     |      |     |       |

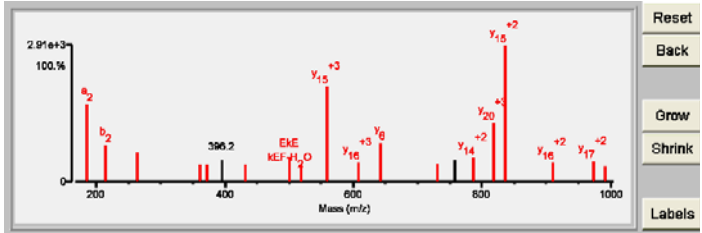

Result Summary

| Rank | Score | SPI (%) | BCS | # Unmatched Ions | Variable sites | Sequence                              | MH <sup>+</sup> Calculated (Da) | MH <sup>+</sup> Error (Da) | MH <sup>+</sup> Error (ppm) | Protein MW/PI (Da) | Species | Accession #             | Protein Name                                                         |
|------|-------|---------|-----|------------------|----------------|---------------------------------------|---------------------------------|----------------------------|-----------------------------|--------------------|---------|-------------------------|----------------------------------------------------------------------|
| 1    | 19.39 | 87.1    | 10  | 5/25             | K37k K47k      | (R) <b>VLMEKEFPGLFNQKDP</b> LAVDK(I)  | 2547.3163                       | 228.1078                   | 7.9                         | 11203.2/6.82       | HUMAN   | <a href="#">P60903</a>  | Protein S100-A10 OS=Homo sapiens GN=S100A10 PE=1 SV=2                |
| 2    | 8.48  | 63.2    | 4   | 11/25            | K37k K54k      | (R) <b>VLMEKEFPGLFNQKDP</b> LAVDK(I)  | 2547.3163                       | 228.1078                   | 7.9                         | 11203.2/6.82       | HUMAN   | <a href="#">P60903</a>  | Protein S100-A10 OS=Homo sapiens GN=S100A10 PE=1 SV=2                |
| 3    | 5.33  | 51.9    | 2   | 14/25            | M383m K390k    | (R) <b>INMQRTRSKKS</b> PNIVHCEAFK(E)  | 2645.3763                       | 130.0479                   | 3.6                         | 64118.2/4.96       | HUMAN   | <a href="#">RQ9Y4XS</a> | REVERSE Protein ariadne-1 homolog OS=Homo sapiens GN=AR1H1 PE=1 SV=2 |
| 3    | 5.33  | 51.9    | 2   | 14/25            | M383m K389k    | (R) <b>INMQRTRSKKS</b> PNIVHCEAFK(E)  | 2645.3763                       | 130.0479                   | 3.6                         | 64118.2/4.96       | HUMAN   | <a href="#">RQ9Y4XS</a> | REVERSE Protein ariadne-1 homolog OS=Homo sapiens GN=AR1H1 PE=1 SV=2 |
| 4    | 5.32  | 55.1    | 3   | 12/25            | K740k          | (K) <b>EKDFLVGANAL</b> TDEHNRLPHEK(S) | 2661.3380                       | 114.0862                   | 15.6                        | 141417.9/6.88      | HUMAN   | <a href="#">RO15090</a> | REVERSE Zinc finger protein 536 OS=Homo sapiens GN=ZNF536 PE=1 SV=3  |

Detailed Results

| Rank | Score | SPI (%) | BCS | # Unmatched Ions | Variable sites | Sequence                        | MH <sup>+</sup> Calculated (Da) | MH <sup>+</sup> Error (Da) | MH <sup>+</sup> Error (ppm) | Protein MW/PI (Da) | Species | Accession #            | MS-Digest Index #      | Protein Name                                          |
|------|-------|---------|-----|------------------|----------------|---------------------------------|---------------------------------|----------------------------|-----------------------------|--------------------|---------|------------------------|------------------------|-------------------------------------------------------|
| 1    | 19.39 | 87.1    | 10  | 5/25             | K37k K47k      | (R)VLMEKEFPGLFNQKDP/LA/V/D/K(I) | 2547.3163                       | 228.1078                   | 7.9                         | 11203.2/6.82       | HUMAN   | <a href="#">P60903</a> | <a href="#">704043</a> | Protein S100-A10 OS=Homo sapiens GN=S100A10 PE=1 SV=2 |

| Fragment-ion (m/z)     | 70.067 | 72.083 | 84.079 | 86.095 | 120.079 | 147.111 | 165.165 | 167.143 | 213.159 | 262.139 | 301.161 | 361.211 | 372.188 | 432.247 | 519.258 | 595.643 <sup>+3</sup> | 642.382 | 757.411 | 757.509 | 835.951 <sup>+2</sup> | 844.426           | 855.094 <sup>+3</sup> | 883.446 | 892.447 <sup>+3</sup> | 892.970 <sup>+2</sup> |      |
|------------------------|--------|--------|--------|--------|---------|---------|---------|---------|---------|---------|---------|---------|---------|---------|---------|-----------------------|---------|---------|---------|-----------------------|-------------------|-----------------------|---------|-----------------------|-----------------------|------|
| Frac. Inten.(% of TIC) | 0.00   | 0.43   | 0.25   | 0.46   | 0.13    | 4.00    | 11.04   | 3.33    | 8.35    | 5.35    | 3.01    | 2.58    | 3.16    | 4.79    | 3.15    | 5.77                  | 8.11    | 2.43    | 2.51    | 2.78                  | 4.96              | 4.22                  | 2.79    | 3.00                  | 13.39                 |      |
| Rel. Inten.(% of BP)   | 0.02   | 3.19   | 1.84   | 3.41   | 1.01    | 29.84   | 82.46   | 24.89   | 62.32   | 39.92   | 22.46   | 19.29   | 23.58   | 35.77   | 23.52   | 43.11                 | 60.53   | 18.18   | 18.73   | 20.75                 | 37.06             | 31.54                 | 20.82   | 22.41                 | 100.00                |      |
| Score                  | 0.20   | 0.50   | 0.50   | 0.22   | 1.00    | 1.50    | 0.50    | -0.23   | 0.50    | 1.50    | -0.21   | 1.50    | 0.75    | 1.50    | 0.75    | 1.50                  | 1.50    | 1.50    | -0.18   | 0.50                  | 1.50              | 1.50                  | 1.50    | -0.20                 | -0.21                 | 1.50 |
| Ion-type               | PR     | a1     | KQ     | LI     | F       | y1      | e2      | b2      | y2      | y3      | KE      | y4      | KE      | y4      | KEF     | y15 <sup>+3</sup>     | y6      | y7      |         | y14-NH3 <sup>+2</sup> | b6                | y20 <sup>+3</sup>     |         |                       | y15 <sup>+2</sup>     |      |
| Delta ppm              | 23.9   | 11.5   | -18.7  | -11.9  | -13.1   | -11.6   | -2.9    | -11.0   | -4.0    | 8.4     | -1.2    | 4.0     | 2.0     |         |         | -2.2                  | 0.3     | 2.3     |         | 33.8                  | 1.4               | 6.9                   |         |                       | 7.8                   |      |
|                        |        |        |        |        |         |         |         |         |         |         |         |         |         |         |         |                       |         |         |         |                       | y <sup>++14</sup> |                       |         |                       |                       |      |
|                        |        |        |        |        |         |         |         |         |         |         |         |         |         |         |         |                       |         |         |         |                       |                   |                       |         |                       |                       |      |

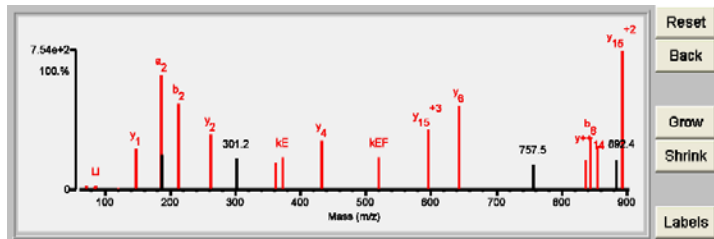

Result Summary

| Rank | Score | SPI (%) | BCS | # Unmatched Ions | Variable sites       | Sequence                             | MH <sup>+</sup> Calculated (Da) | MH <sup>+</sup> Error (Da) | MH <sup>+</sup> Error (ppm) | Protein MW/pI (Da) | Species | Accession # | Protein Name                                                        |
|------|-------|---------|-----|------------------|----------------------|--------------------------------------|---------------------------------|----------------------------|-----------------------------|--------------------|---------|-------------|---------------------------------------------------------------------|
| 1    | 13.11 | 77.1    | 5   | 9/25             | K47k                 | (K)EFPGFLENQKDP <del>L</del> AVDK(I) | 1946.9858                       | 114.0579                   | 7.3                         | 11203.2/6.82       | HUMAN   | P60903      | Protein S100-A10 OS=Homo sapiens GN=S100A10 PE=1 SV=2               |
| 2    | 7.02  | 58.1    | 2   | 13/25            | K54k                 | (K)EFPGFLENQKDP <del>L</del> AVDK(I) | 1946.9858                       | 114.0579                   | 7.3                         | 11203.2/6.82       | HUMAN   | P60903      | Protein S100-A10 OS=Homo sapiens GN=S100A10 PE=1 SV=2               |
| 3    | 6.42  | 56.2    | 2   | 14/25            | None                 | (R)EFTGLEPIVSDVIRGICR(D)             | 2061.0797                       | -0.0360                    | -17.5                       | 69483.3/8.17       | HUMAN   | Q43405      | Cochlin OS=Homo sapiens GN=COCH PE=1 SV=1                           |
| 4    | 6.15  | 51.6    | 3   | 15/25            | K643k                | (K)EFNEYQAHAGPITK <del>V</del> SR(A) | 1946.9719                       | 114.0718                   | 14.0                        | 78164.8/6.48       | HUMAN   | Q96MR6      | WD repeat-containing protein 65 OS=Homo sapiens GN=WDR65 PE=2 SV=2  |
| 5    | 4.94  | 52.7    | 2   | 16/25            | M2149m K2143k K2145k | (K)EFGILAKTKYFQ <del>M</del> LK(M)   | 1817.0030                       | 244.0408                   | -19.4                       | 250750.0/5.67      | HUMAN   | P50748      | Kinetochore-associated protein 1 OS=Homo sapiens GN=KNTC1 PE=1 SV=1 |

Detailed Results

| Rank | Score | SPI (%) | BCS | # Unmatched Ions | Variable sites | Sequence                             | MH <sup>+</sup> Calculated (Da) | MH <sup>+</sup> Error (Da) | MH <sup>+</sup> Error (ppm) | Protein MW/pI (Da) | Species | Accession # | MS-Digest Index # | Protein Name                                          |
|------|-------|---------|-----|------------------|----------------|--------------------------------------|---------------------------------|----------------------------|-----------------------------|--------------------|---------|-------------|-------------------|-------------------------------------------------------|
| 1    | 13.11 | 77.1    | 5   | 9/25             | K47k           | (K)EFPGFLENQKDP <del>L</del> AVDK(I) | 1946.9858                       | 114.0579                   | 7.3                         | 11203.2/6.82       | HUMAN   | P60903      | 704043            | Protein S100-A10 OS=Homo sapiens GN=S100A10 PE=1 SV=2 |

  

| Fragment-ion (m/z)      | 70.066 | 72.081 | 84.041 | 86.096 | 120.079 | 130.084 | 186.088 | 231.108 | 249.120 | 302.139 | 361.226 | 432.244 | 544.269 | 555.232 <sup>+2</sup> | 557.624 <sup>+3</sup> | 561.244 | 589.647 <sup>+3</sup> | 595.642 <sup>+3</sup> | 642.393 | 727.356 <sup>+2</sup> | 742.382 <sup>+2</sup> | 757.404 | 795.893 | 844.928 | 892.969 <sup>+2</sup> |
|-------------------------|--------|--------|--------|--------|---------|---------|---------|---------|---------|---------|---------|---------|---------|-----------------------|-----------------------|---------|-----------------------|-----------------------|---------|-----------------------|-----------------------|---------|---------|---------|-----------------------|
| Frac. Inten. (% of TIC) | 0.01   | 0.07   | 2.14   | 0.15   | 0.10    | 2.09    | 3.64    | 2.86    | 11.99   | 2.59    | 2.12    | 3.88    | 3.58    | 2.50                  | 3.54                  | 2.19    | 6.18                  | 17.46                 | 8.12    | 2.22                  | 2.51                  | 4.86    | 2.38    | 2.84    | 9.96                  |
| Rel. Inten. (% of BP)   | 0.04   | 0.41   | 12.24  | 0.88   | 0.60    | 12.00   | 20.83   | 16.39   | 68.71   | 14.81   | 12.16   | 22.24   | 20.52   | 14.35                 | 20.25                 | 12.57   | 35.41                 | 100.00                | 46.49   | 12.73                 | 14.36                 | 27.87   | 13.63   | 16.29   | 57.07                 |
| Score                   | 0.20   | 0.50   | -0.12  | 0.22   | 1.00    | 0.50    | -0.21   | -0.16   | 0.50    | 0.75    | -0.12   | 1.50    | 0.75    | -0.14                 | 0.50                  | -0.13   | 0.50                  | 1.50                  | 1.50    | -0.13                 | 1.50                  | 1.50    | -0.14   | -0.16   | 1.50                  |
| Ion-type                | PR     | V      |        | LI     | F       | y1-NH3  |         |         | b2      | PGF     |         | y4      | PGFLE   |                       | y14-NH3 <sup>+3</sup> |         | y15-H2O <sup>+3</sup> |                       | y6      |                       | y12 <sup>+2</sup>     | y7      |         |         | y15 <sup>+2</sup>     |
| Delta ppm               | 18.2   | -2.4   |        | -2.6   | -14.8   | -17.3   |         |         | -17.9   | -40.4   |         | -2.3    | -15.0   |                       | 11.6                  |         | 10.2                  |                       | 16.5    |                       | -12.1                 | -7.2    |         |         | 7.3                   |

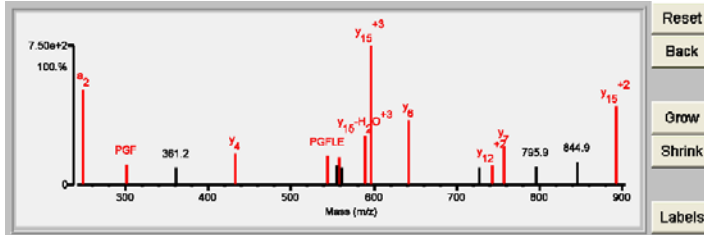

Result Summary

| Rank | Score | SPI (%) | BCS | # Unmatched Ions | Variable sites | Sequence                                      | MH <sup>+</sup> Calculated (Da) | MH <sup>+</sup> Error (Da) | MH <sup>+</sup> Error (ppm) | Protein MW/pi (Da) | Species | Accession # | Protein Name                                          |
|------|-------|---------|-----|------------------|----------------|-----------------------------------------------|---------------------------------|----------------------------|-----------------------------|--------------------|---------|-------------|-------------------------------------------------------|
| 1    | 19.55 | 84.9    | 10  | 4/25             | K27k           | (K)YAGKDGYN <del>Y</del> TL <del>S</del> K(T) | 1479.7114                       | 114.0466                   | 2.3                         | 11740.5/6.56       | HUMAN   | P31949      | Protein S100-A11 OS=Homo sapiens GN=S100A11 PE=1 SV=2 |

Detailed Results

| Rank                   | Score  | SPI (%) | BCS    | # Unmatched Ions | Variable sites | Sequence                                      | MH <sup>+</sup> Calculated (Da) | MH <sup>+</sup> Error (Da) | MH <sup>+</sup> Error (ppm) | Protein MW/pi (Da) | Species | Accession # | MS-Digest Index # | Protein Name                                          |         |         |         |         |         |         |                       |                       |                       |                   |          |
|------------------------|--------|---------|--------|------------------|----------------|-----------------------------------------------|---------------------------------|----------------------------|-----------------------------|--------------------|---------|-------------|-------------------|-------------------------------------------------------|---------|---------|---------|---------|---------|---------|-----------------------|-----------------------|-----------------------|-------------------|----------|
| 1                      | 19.55  | 84.9    | 10     | 4/25             | K27k           | (K)YAGKDGYN <del>Y</del> TL <del>S</del> K(T) | 1479.7114                       | 114.0466                   | 2.3                         | 11740.5/6.56       | HUMAN   | P31949      | 704059            | Protein S100-A11 OS=Homo sapiens GN=S100A11 PE=1 SV=2 |         |         |         |         |         |         |                       |                       |                       |                   |          |
| Fragment-ion (m/z)     | 84.081 | 86.096  | 87.053 | 91.054           | 119.050        | 129.102                                       | 130.091                         | 136.075                    | 137.078                     | 147.112            | 207.112 | 216.131     | 234.143           | 235.108                                               | 300.165 | 347.227 | 361.176 | 371.204 | 448.280 | 611.342 | 680.340 <sup>+2</sup> | 706.313               | 715.842 <sup>+2</sup> | 725.384           | 1060.495 |
| Frac. Inten.(% of TIC) | 0.61   | 0.11    | 0.10   | 3.54             | 3.30           | 0.23                                          | 2.71                            | 1.82                       | 5.84                        | 5.68               | 15.79   | 2.50        | 8.20              | 5.46                                                  | 2.72    | 2.92    | 2.41    | 2.60    | 7.44    | 4.94    | 5.07                  | 2.51                  | 2.64                  | 5.21              | 5.65     |
| Rel. Inten.(% of BP)   | 3.86   | 0.68    | 0.65   | 22.43            | 20.93          | 1.47                                          | 17.16                           | 11.53                      | 37.02                       | 35.98              | 100.00  | 15.81       | 51.95             | 34.55                                                 | 17.21   | 18.48   | 15.25   | 16.46   | 47.10   | 31.30   | 32.08                 | 15.89                 | 16.75                 | 33.02             | 35.79    |
| Score                  | 0.50   | 0.22    | 0.33   | -0.22            | -0.21          | 0.20                                          | 0.50                            | 1.00                       | -0.37                       | 1.50               | 0.50    | 0.50        | 1.50              | 0.50                                                  | 0.75    | 1.50    | -0.15   | 0.75    | 1.50    | 1.50    | 1.50                  | 0.75                  | 1.50                  | 1.50              | 1.50     |
| Ion-type               | KQ     | LI      | NR     |                  |                | RKQ                                           | y1-NH3                          | a1                         |                             | y1                 | a2      | y2-H2O      | y2                | b2                                                    | Gk      | y3      |         | AGk     | y4      | y5      |                       | b6                    | b12-NH3 <sup>+2</sup> | y6                | y9       |
| Delta ppm              | 0.3    | -1.5    | -30.9  |                  |                | -5.0                                          | 34.9                            | -16.1                      | 1.00                        | -7.5               | -7.2    | -14.2       | -8.7              | -3.0                                                  | -10.1   | -5.7    |         | -2.3    | 7.4     | 4.1     |                       | -4.8                  | 37.6                  | 1.9               | -0.1     |
|                        |        |         |        |                  |                |                                               |                                 | Y                          | -8.0                        |                    |         |             |                   |                                                       |         |         |         |         |         |         | 13.8                  | AGKDG <sup>-4.8</sup> | Y12 <sup>+2</sup>     | Y12 <sup>+2</sup> |          |

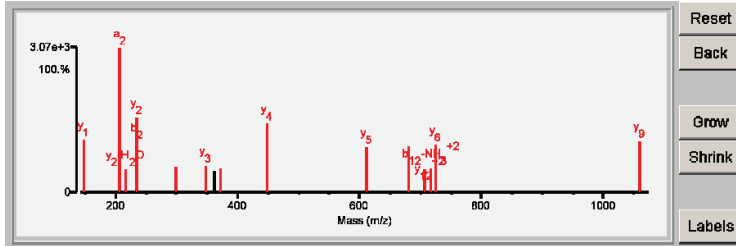

Result Summary

| Rank | Score | SPI (%) | BCS | # Unmatched Ions | Variable sites | Sequence              | MH <sup>+</sup> Calculated (Da) | MH <sup>+</sup> Error (Da) | MH <sup>+</sup> Error (ppm) | Protein MW/pI (Da) | Species | Accession # | Protein Name                                                                         |
|------|-------|---------|-----|------------------|----------------|-----------------------|---------------------------------|----------------------------|-----------------------------|--------------------|---------|-------------|--------------------------------------------------------------------------------------|
| 1    | 14.12 | 74.4    | 11  | 7/25             | K150k          | (K)KAEAGAGSATEFQFR(G) | 1569.7656                       | 114.0561                   | 7.8                         | 20120.4/10.13      | HUMAN   | Q9NQ39      | Putative 40S ribosomal protein S10-like protein OS=Homo sapiens GN=RPS10P5 PE=5 SV=1 |
| 1    | 14.12 | 74.4    | 11  | 7/25             | K139k          | (K)KAEAGAGSATEFQFR(G) | 1569.7656                       | 114.0561                   | 7.8                         | 18897.9/10.15      | HUMAN   | P46783      | 40S ribosomal protein S10 OS=Homo sapiens GN=RPS10 PE=1 SV=1                         |

Detailed Results

| Rank | Score | SPI (%) | BCS | # Unmatched Ions | Variable sites | Sequence                                 | MH <sup>+</sup> Calculated (Da) | MH <sup>+</sup> Error (Da) | MH <sup>+</sup> Error (ppm) | Protein MW/pI (Da) | Species | Accession # | MS-Digest Index # | Protein Name                                                                         |
|------|-------|---------|-----|------------------|----------------|------------------------------------------|---------------------------------|----------------------------|-----------------------------|--------------------|---------|-------------|-------------------|--------------------------------------------------------------------------------------|
| 1    | 14.12 | 74.4    | 11  | 7/25             | K150k          | (K)K A E A G A G A G S A T E F Q F R (G) | 1569.7656                       | 114.0561                   | 7.8                         | 20120.4/10.13      | HUMAN   | Q9NQ39      | 663053            | Putative 40S ribosomal protein S10-like protein OS=Homo sapiens GN=RPS10P5 PE=5 SV=1 |
| 1    | 14.12 | 74.4    | 11  | 7/25             | K139k          | (K)K A E A G A G A G S A T E F Q F R (G) | 1569.7656                       | 114.0561                   | 7.8                         | 18897.9/10.15      | HUMAN   | P46783      | 663631            | 40S ribosomal protein S10 OS=Homo sapiens GN=RPS10 PE=1 SV=1                         |

| Fragment-ion (m/z)      | 60.044 | 74.061 | 84.080 | 102.053 | 120.081 | 158.088                         | 175.118        | 213.084 | 276.128 | 309.129        | 322.192 | 406.210        | 426.213        | 443.228        | 450.236        | 470.743 <sup>+2</sup>                           | 514.271        | 529.222 | 571.271        | 597.318        | 642.310        | 699.333        | 726.362        | 768.361                          | 827.408        |
|-------------------------|--------|--------|--------|---------|---------|---------------------------------|----------------|---------|---------|----------------|---------|----------------|----------------|----------------|----------------|-------------------------------------------------|----------------|---------|----------------|----------------|----------------|----------------|----------------|----------------------------------|----------------|
| Frac. Inten. (% of TIC) | 5.94   | 3.91   | 0.41   | 0.08    | 0.12    | 3.47                            | 4.44           | 2.85    | 3.41    | 2.52           | 3.72    | 4.61           | 2.63           | 3.70           | 3.17           | 2.79                                            | 2.60           | 3.11    | 4.67           | 15.72          | 2.80           | 3.45           | 8.75           | 5.15                             | 6.00           |
| Rel. Inten. (% of BP)   | 37.80  | 24.90  | 2.59   | 0.48    | 0.74    | 22.06                           | 28.22          | 18.13   | 21.72   | 16.02          | 23.63   | 29.32          | 16.70          | 23.55          | 20.18          | 17.75                                           | 16.51          | 19.80   | 29.72          | 100.00         | 17.80          | 21.93          | 55.67          | 32.75                            | 38.14          |
| Score                   | -0.38  | -0.25  | 0.50   | 1.00    | 1.00    | 0.50                            | 1.50           | -0.18   | 0.75    | -0.16          | 1.50    | -0.29          | -0.17          | 0.50           | 1.50           | 0.25                                            | 0.50           | -0.20   | 0.50           | 1.50           | 0.50           | 1.50           | 1.50           | 0.25                             | 1.50           |
| Ion-type                |        |        | KQ     | E       | F       | y <sub>1</sub> -NH <sub>3</sub> | y <sub>1</sub> |         | QF      | y <sub>2</sub> |         | b <sub>3</sub> | y <sub>3</sub> | b <sub>3</sub> | y <sub>3</sub> | b <sub>10</sub> -H <sub>2</sub> O <sup>+2</sup> | b <sub>4</sub> |         | b <sub>5</sub> | y <sub>4</sub> | b <sub>6</sub> | b <sub>7</sub> | y <sub>5</sub> | b <sub>8</sub> -H <sub>2</sub> O | y <sub>6</sub> |
| Delta ppm               |        |        |        | -5.7    | -21.1   | -1.5                            | -27.2          | -6.0    | -28.5   |                | 13.8    |                |                | 4.8            | -21.2          | 30.1                                            | 14.6           |         | -23.7          | 5.8            | -18.0          | -13.8          | 7.5            | -4.3                             | 3.6            |

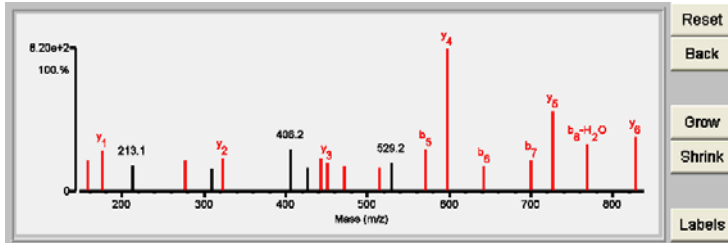

Result Summary

| Rank | Score | SPI (%) | BCS | # Unmatched Ions | Variable sites | Sequence             | MH <sup>+</sup> Calculated (Da) | MH <sup>+</sup> Error (Da) | MH <sup>+</sup> Error (ppm) | Protein MW/pi (Da) | Species | Accession # | Protein Name                                                                                               |
|------|-------|---------|-----|------------------|----------------|----------------------|---------------------------------|----------------------------|-----------------------------|--------------------|---------|-------------|------------------------------------------------------------------------------------------------------------|
| 1    | 11.40 | 68.8    | 7   | 11/25            | K12K           | (K)VQKVMVQPINLIFR(Y) | 1684.9931                       | 114.0478                   | 2.7                         | 10678.477.86       | HUMAN   | Q5VYJ4      | Putative small nuclear ribonucleoprotein polypeptide E-like protein 1 OS=Homo sapiens GN=SNRPEL1 PE=5 SV=1 |
| 1    | 11.40 | 68.8    | 7   | 11/25            | K12K           | (K)VQKVMVQPINLIFR(Y) | 1684.9931                       | 114.0478                   | 2.7                         | 10803.779.46       | HUMAN   | P62304      | Small nuclear ribonucleoprotein E OS=Homo sapiens GN=SNRPE PE=1 SV=1                                       |

Detailed Results

| Rank | Score | SPI (%) | BCS | # Unmatched Ions | Variable sites | Sequence             | MH <sup>+</sup> Calculated (Da) | MH <sup>+</sup> Error (Da) | MH <sup>+</sup> Error (ppm) | Protein MW/pi (Da) | Species | Accession # | MS-Digest Index # | Protein Name                                                                                               |
|------|-------|---------|-----|------------------|----------------|----------------------|---------------------------------|----------------------------|-----------------------------|--------------------|---------|-------------|-------------------|------------------------------------------------------------------------------------------------------------|
| 1    | 11.40 | 68.8    | 7   | 11/25            | K12K           | (K)VQKVMVQPINLIFR(Y) | 1684.9931                       | 114.0478                   | 2.7                         | 10678.477.86       | HUMAN   | Q5VYJ4      | 698231            | Putative small nuclear ribonucleoprotein polypeptide E-like protein 1 OS=Homo sapiens GN=SNRPEL1 PE=5 SV=1 |
| 1    | 11.40 | 68.8    | 7   | 11/25            | K12K           | (K)VQKVMVQPINLIFR(Y) | 1684.9931                       | 114.0478                   | 2.7                         | 10803.779.46       | HUMAN   | P62304      | 703613            | Small nuclear ribonucleoprotein E OS=Homo sapiens GN=SNRPE PE=1 SV=1                                       |

| Fragment-Ion (m/z)      | 70.063 | 72.081 | 84.080 | 101.070 | 106.047 | 133.078 | 134.086 | 175.117 | 313.182 | 397.252 | 400.222 <sup>+2</sup> | 434.745 <sup>+2</sup> | 436.783 | 470.284 | 480.109 | 522.804 | 548.343 | 608.351 | 662.397 | 775.467 | 785.379 | 799.967 <sup>+2</sup> | 872.526 | 910.507 | 1000.604 |
|-------------------------|--------|--------|--------|---------|---------|---------|---------|---------|---------|---------|-----------------------|-----------------------|---------|---------|---------|---------|---------|---------|---------|---------|---------|-----------------------|---------|---------|----------|
| Frac. Inten. (% of TIC) | 0.01   | 0.63   | 0.18   | 0.19    | 2.69    | 3.91    | 3.38    | 5.28    | 3.42    | 5.05    | 7.69                  | 2.70                  | 2.70    | 3.51    | 2.92    | 3.16    | 4.60    | 3.69    | 10.24   | 6.68    | 3.66    | 2.95                  | 14.82   | 2.77    | 3.17     |
| Rel. Inten. (% of BP)   | 0.05   | 4.22   | 1.18   | 1.27    | 18.16   | 26.41   | 22.78   | 35.61   | 23.10   | 34.07   | 51.91                 | 18.24                 | 18.24   | 23.69   | 19.70   | 21.32   | 31.07   | 24.91   | 69.09   | 45.05   | 24.71   | 19.90                 | 100.00  | 18.67   | 21.40    |
| Score                   | 0.20   | 0.50   | 0.11   | 0.50    | 1.27    | 1.81    | 1.50    | 2.11    | 1.50    | 2.11    | 3.11                  | 1.00                  | 1.00    | 1.25    | 1.00    | 1.00    | 1.25    | 1.00    | 3.00    | 1.88    | 1.00    | 1.00                  | 1.50    | 1.50    | 1.50     |
| PR                      |        | 0.1    |        | 0.1     | 0.1     | 0.1     | 0.1     | 0.1     | 0.1     | 0.1     | 0.1                   | 0.1                   | 0.1     | 0.1     | 0.1     | 0.1     | 0.1     | 0.1     | 0.1     | 0.1     | 0.1     | 0.1                   | 0.1     | 0.1     | 0.1      |
| Ion-type                |        | 0.1    |        | 0.1     | 0.1     | 0.1     | 0.1     | 0.1     | 0.1     | 0.1     | 0.1                   | 0.1                   | 0.1     | 0.1     | 0.1     | 0.1     | 0.1     | 0.1     | 0.1     | 0.1     | 0.1     | 0.1                   | 0.1     | 0.1     | 0.1      |
| Delta ppm               | -34.6  | -14.9  | 0.50   | -13.3   |         |         |         | -10.0   |         |         | -17.8                 |                       |         | 26.6    |         |         | -23.3   |         | -2.7    | -20.1   |         |                       | -11.1   | 26.6    | 10.6     |

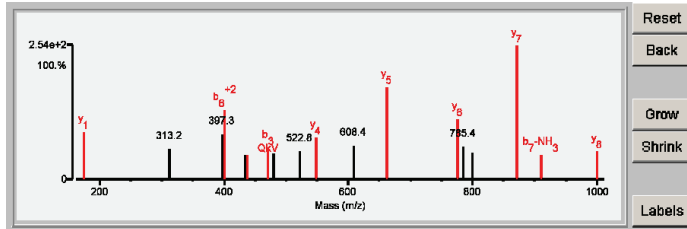

Result Summary

| Rank | Score | SPI (%) | BCS | # Unmatched Ions | Variable sites | Sequence                 | MH <sup>+</sup> Calculated (Da) | MH <sup>+</sup> Error (Da) | MH <sup>+</sup> Error (ppm) | Protein MW/pi (Da) | Species | Accession # | Protein Name                                                     |
|------|-------|---------|-----|------------------|----------------|--------------------------|---------------------------------|----------------------------|-----------------------------|--------------------|---------|-------------|------------------------------------------------------------------|
| 1    | 13.63 | 71.8    | 5   | 8/25             | K305k          | (R)GDLGIEIPAEK/VFLAQK(M) | 1828.0215                       | 114.0642                   | 10.9                        | 57937.27.95        | HUMAN   | P14618      | Pyruvate kinase isozymes M1/M2 OS=Homo sapiens GN=PKM2 PE=1 SV=4 |
| 1    | 13.63 | 71.8    | 5   | 8/25             | K348k          | (R)GDLGIEIPAEK/VFLAQK(M) | 1828.0215                       | 114.0642                   | 10.9                        | 61830.57.65        | HUMAN   | P30613      | Pyruvate kinase isozymes R/L OS=Homo sapiens GN=PKLR PE=1 SV=2   |
| 2    | 10.62 | 66.4    | 3   | 10/25            | K311k          | (R)GDLGIEIPAEK/VFLAQK(M) | 1828.0215                       | 114.0642                   | 10.9                        | 57937.27.95        | HUMAN   | P14618      | Pyruvate kinase isozymes M1/M2 OS=Homo sapiens GN=PKM2 PE=1 SV=4 |
| 2    | 10.62 | 66.4    | 3   | 10/25            | K354k          | (R)GDLGIEIPAEK/VFLAQK(M) | 1828.0215                       | 114.0642                   | 10.9                        | 61830.57.65        | HUMAN   | P30613      | Pyruvate kinase isozymes R/L OS=Homo sapiens GN=PKLR PE=1 SV=2   |

Detailed Results

| Rank | Score | SPI (%) | BCS | # Unmatched Ions | Variable sites | Sequence                 | MH <sup>+</sup> Calculated (Da) | MH <sup>+</sup> Error (Da) | MH <sup>+</sup> Error (ppm) | Protein MW/pi (Da) | Species | Accession # | MS-Digest Index # | Protein Name                                                     |
|------|-------|---------|-----|------------------|----------------|--------------------------|---------------------------------|----------------------------|-----------------------------|--------------------|---------|-------------|-------------------|------------------------------------------------------------------|
| 1    | 13.63 | 71.8    | 5   | 8/25             | K305k          | (R)GDLGIEIPAEK/VFLAQK(M) | 1828.0215                       | 114.0642                   | 10.9                        | 57937.27.95        | HUMAN   | P14618      | 344051            | Pyruvate kinase isozymes M1/M2 OS=Homo sapiens GN=PKM2 PE=1 SV=4 |
| 1    | 13.63 | 71.8    | 5   | 8/25             | K348k          | (R)GDLGIEIPAEK/VFLAQK(M) | 1828.0215                       | 114.0642                   | 10.9                        | 61830.57.65        | HUMAN   | P30613      | 344063            | Pyruvate kinase isozymes R/L OS=Homo sapiens GN=PKLR PE=1 SV=2   |

  

| Fragment-ion (m/z)      | 84.043 | 84.081 | 86.095 | 120.081 | 143.115 | 147.108 | 169.094 | 171.113 | 177.108 | 243.135 | 258.139 | 300.150 | 311.160 | 343.156 | 353.129 | 357.165 | 413.238 <sup>+2</sup> | 438.215 | 543.283 | 622.852 | 623.351 | 705.412 | 733.400 <sup>+2</sup> | 828.961 <sup>+2</sup> | 1244.690 |
|-------------------------|--------|--------|--------|---------|---------|---------|---------|---------|---------|---------|---------|---------|---------|---------|---------|---------|-----------------------|---------|---------|---------|---------|---------|-----------------------|-----------------------|----------|
| Frac. Inten. (% of TIC) | 0.09   | 0.29   | 0.96   | 0.13    | 3.73    | 2.57    | 2.81    | 4.20    | 2.63    | 3.17    | 3.07    | 4.83    | 2.57    | 3.19    | 3.64    | 2.57    | 3.49                  | 3.02    | 2.51    | 21.00   | 7.74    | 2.83    | 8.64                  | 5.70                  | 4.63     |
| Rel. Inten. (% of BP)   | 0.42   | 1.40   | 4.57   | 0.61    | 17.74   | 12.25   | 13.38   | 20.02   | 12.51   | 15.10   | 14.64   | 22.98   | 12.24   | 15.19   | 17.31   | 12.23   | 16.61                 | 14.37   | 11.94   | 100.00  | 36.86   | 13.50   | 41.13                 | 27.15                 | 22.04    |
| Score                   | 1.00   | 0.50   | 0.22   | 1.00    | 0.50    | 1.50    | 0.75    | 0.75    | -0.13   | 0.75    | 0.50    | 0.75    | -0.12   | 0.50    | -0.17   | -0.12   | 16.61                 | -0.14   | -0.12   | 1.50    | 1.50    | 1.50    | 0.25                  | 1.50                  |          |
| Ion-type                | E      | KQ     | LI     | F       | GI-28   | Y1      | PA      | GI      | EI      | a3      | GI      | b4      | Y10     | Y10     | Y10     | Y10     | Y10                   | Y10     | Y10     | Y10     | Y10     | Y10     | Y10                   | Y10                   | Y10      |
| Delta ppm               | -21.3  | -3.3   | -13.1  | 4.4     | -18.6   | -32.0   | -18.7   | 3.5     | -24.1   | -24.1   | -17.3   | -15.8   | -15.8   | -15.8   | -15.8   | -15.8   | -15.8                 | -15.8   | -15.8   | -15.8   | -15.8   | -15.8   | -15.8                 | -15.8                 |          |

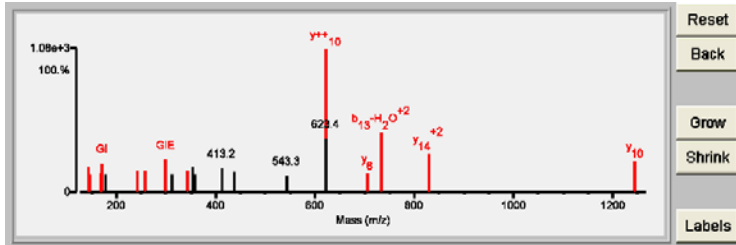



Result Summary

| Rank | Score | SPI (%) | BCS | # Unmatched Ions | Variable sites | Sequence              | MH <sup>+</sup> Calculated (Da) | MH <sup>+</sup> Error (Da) | MH <sup>+</sup> Error (ppm) | Protein MW/pi (Da) | Species | Accession # | Protein Name                             |
|------|-------|---------|-----|------------------|----------------|-----------------------|---------------------------------|----------------------------|-----------------------------|--------------------|---------|-------------|------------------------------------------|
| 1    | 21.58 | 87.1    | 11  | 3/25             | K209k          | (K)AQLDEMYGVNYFEIK(K) | 2175.0791                       | 114.0574                   | 6.3                         | 68564.2/6.03       | HUMAN   | P35241      | Radixin OS=Homo sapiens GN=RDX PE=1 SV=1 |
| 1    | 21.58 | 87.1    | 11  | 3/25             | K211k          | (K)AQLDEMYGVNYFEIK(K) | 2175.0791                       | 114.0574                   | 6.3                         | 68564.2/6.03       | HUMAN   | P35241      | Radixin OS=Homo sapiens GN=RDX PE=1 SV=1 |

Detailed Results

| Rank                   | Score | SPI (%) | BCS    | # Unmatched Ions | Variable sites | Sequence                                                      | MH <sup>+</sup> Calculated (Da) | MH <sup>+</sup> Error (Da) | MH <sup>+</sup> Error (ppm) | Protein MW/pi (Da) | Species | Accession # | MS-Digest Index # | Protein Name                             |         |                   |         |         |                   |                   |                       |                       |                       |                        |          |          |
|------------------------|-------|---------|--------|------------------|----------------|---------------------------------------------------------------|---------------------------------|----------------------------|-----------------------------|--------------------|---------|-------------|-------------------|------------------------------------------|---------|-------------------|---------|---------|-------------------|-------------------|-----------------------|-----------------------|-----------------------|------------------------|----------|----------|
| 1                      | 21.58 | 87.1    | 11     | 3/25             | K209k          | (K) I A Q D L E / M Y / G V / N / Y / F / E / L / K / N K (K) | 2175.0791                       | 114.0574                   | 6.3                         | 68564.2/6.03       | HUMAN   | P35241      | 278256            | Radixin OS=Homo sapiens GN=RDX PE=1 SV=1 |         |                   |         |         |                   |                   |                       |                       |                       |                        |          |          |
| Fragment-ion (m/z)     |       | 72.080  | 84.080 | 86.097           | 87.100         | 120.080                                                       | 129.102                         | 136.074                    | 157.133                     | 185.130            | 261.159 | 315.126     | 357.183           | 469.217                                  | 503.291 | 513.283           | 616.376 | 663.329 | 728.386           | 745.407           | 810.376 <sup>+2</sup> | 874.911 <sup>+2</sup> | 892.482               | 1043.969 <sup>+2</sup> | 1055.541 | 1169.601 |
| Frac. Inten.(% of TIC) |       | 0.11    | 0.14   | 20.99            | 4.49           | 0.11                                                          | 0.13                            | 0.38                       | 5.20                        | 3.32               | 2.82    | 3.53        | 3.26              | 5.92                                     | 4.16    | 2.53              | 5.70    | 2.94    | 3.51              | 4.00              | 2.91                  | 3.68                  | 8.42                  | 3.36                   | 5.28     | 3.09     |
| Rel. Inten.(% of BP)   |       | 0.53    | 0.69   | 100.00           | 21.40          | 0.51                                                          | 0.63                            | 1.82                       | 24.76                       | 15.79              | 13.45   | 16.80       | 15.51             | 28.21                                    | 19.84   | 12.07             | 27.16   | 14.02   | 16.72             | 19.07             | 13.87                 | 17.53                 | 40.10                 | 16.01                  | 25.13    | 14.70    |
| Score                  |       | 0.50    | 0.50   | 0.50             | -0.21          | 1.00                                                          | 0.20                            | 1.00                       | 0.50                        | 1.50               | 0.75    | 0.75        | 0.75              | -0.28                                    | 1.50    | -0.12             | 1.50    | 1.50    | 0.50              | 1.50              | 1.50                  | 1.50                  | 1.50                  | 0.50                   | 1.50     | 1.50     |
| Ion-type               |       | V       | KQ     | a1               |                | F                                                             | RKQ                             | Y                          | a2                          | b2                 | y2      | AQD         | kN                | y3                                       | y4      | y <sup>++10</sup> | y5-NH3  | y5      | y12 <sup>+2</sup> | y13 <sup>+2</sup> | y13                   | y6                    | y16-H2O <sup>+2</sup> | y7                     | y8       |          |
| Delta ppm              |       | -16.3   | -14.0  | -7.2             | -4.0           | -2.6                                                          | -12.4                           | -10.4                      | 3.0                         | 14.0               | -15.9   | -18.5       |                   | -5.8                                     |         |                   |         |         | -26.5             | -9.1              | -7.8                  |                       | -28.8                 | -10.8                  | 5.3      |          |

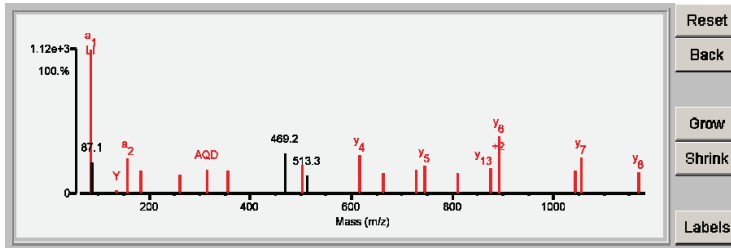

Result Summary

| Rank | Score | SPI (%) | BCS | # Unmatched Ions | Variable sites | Sequence             | MH <sup>+</sup> Calculated (Da) | MH <sup>+</sup> Error (Da) | MH <sup>+</sup> Error (ppm) | Protein MW/pi (Da) | Species | Accession # | Protein Name                              |
|------|-------|---------|-----|------------------|----------------|----------------------|---------------------------------|----------------------------|-----------------------------|--------------------|---------|-------------|-------------------------------------------|
| 1    | 10.38 | 67.2    | 9   | 10/25            | K526k          | (K)kQLQALSSELAQAR(D) | 1542.8598                       | 114.0512                   | 5.0                         | 68564.2/6.03       | HUMAN   | P35241      | Radixin OS=Homo sapiens GN=RDXP PE=1 SV=1 |

Detailed Results

| Rank | Score | SPI (%) | BCS | # Unmatched Ions | Variable sites | Sequence             | MH <sup>+</sup> Calculated (Da) | MH <sup>+</sup> Error (Da) | MH <sup>+</sup> Error (ppm) | Protein MW/pi (Da) | Species | Accession # | MS-Digest Index # | Protein Name                              |
|------|-------|---------|-----|------------------|----------------|----------------------|---------------------------------|----------------------------|-----------------------------|--------------------|---------|-------------|-------------------|-------------------------------------------|
| 1    | 10.38 | 67.2    | 9   | 10/25            | K526k          | (K)kQLQALSSELAQAR(D) | 1542.8598                       | 114.0512                   | 5.0                         | 68564.2/6.03       | HUMAN   | P35241      | 556511            | Radixin OS=Homo sapiens GN=RDXP PE=1 SV=1 |

  

| Fragment-ion (m/z)      | 70.061 | 72.079 | 84.080 | 86.095 | 175.114 | 246.154 | 250.197 | 354.189 | 371.202 | 441.301 | 445.252 | 447.772 <sup>+2</sup> | 556.323 | 558.327 | 604.384 | 611.282 | 618.788 <sup>+2</sup> | 666.361 | 683.386 | 687.377 | 717.328 | 774.392 | 843.443 | 861.458 | 1099.559 |
|-------------------------|--------|--------|--------|--------|---------|---------|---------|---------|---------|---------|---------|-----------------------|---------|---------|---------|---------|-----------------------|---------|---------|---------|---------|---------|---------|---------|----------|
| Frac. Inten. (% of TIC) | 2.83   | 5.79   | 0.31   | 0.58   | 3.91    | 4.95    | 2.67    | 6.13    | 6.26    | 3.42    | 9.82    | 3.01                  | 2.89    | 6.13    | 2.73    | 2.92    | 3.74                  | 2.80    | 5.94    | 3.52    | 2.83    | 5.04    | 3.70    | 3.56    | 4.51     |
| Rel. Inten. (% of BP)   | 28.82  | 58.93  | 3.17   | 5.91   | 39.83   | 50.38   | 27.22   | 62.44   | 63.76   | 34.80   | 100.00  | 30.68                 | 29.40   | 62.38   | 27.77   | 29.78   | 38.13                 | 28.53   | 60.46   | 35.86   | 28.85   | 51.31   | 37.68   | 36.24   | 45.91    |
| Score                   | -0.29  | -0.59  |        | 0.50   | 1.50    | 1.50    | -0.27   | 0.25    | 0.50    | 1.50    |         | -0.31                 | -0.29   | 1.50    | -0.28   | -0.30   | -0.38                 | 0.25    | 0.50    | 1.50    | -0.29   | 1.50    | 0.50    | 1.50    | 0.50     |
| Ion-type                |        |        | KQ     | LI     | y1      | y2      |         | b2-NH3  | b2      |         | y4      |                       |         | y5      |         |         |                       | b5-NH3  | b5      | y6      |         | y7      | y8-H2O  | y8      | b9       |
| Delta ppm               |        |        |        | -5.7   | -15.4   | -30.0   | -7.2    |         | 29.1    | -8.7    |         | 0.3                   |         |         |         |         |                       | 4.9     | 2.3     | -2.1    |         | -23.8   | 12.7    | 17.7    | -15.0    |

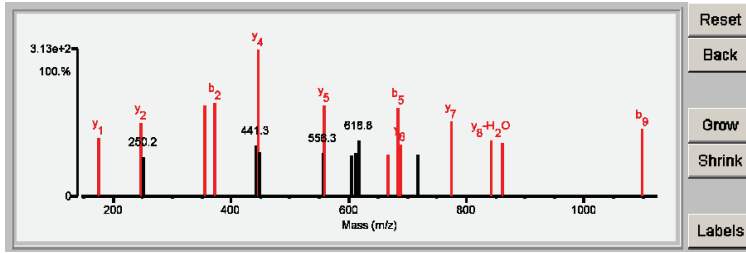

Result Summary

| Rank | Score | SPI (%) | BCS | # Unmatched Ions | Variable sites | Sequence                                                         | MH <sup>+</sup> Calculated (Da) | MH <sup>+</sup> Error (Da) | MH <sup>+</sup> Error (ppm) | Protein MW(pI) (Da) | Species | Accession # | Protein Name                                                                  |
|------|-------|---------|-----|------------------|----------------|------------------------------------------------------------------|---------------------------------|----------------------------|-----------------------------|---------------------|---------|-------------|-------------------------------------------------------------------------------|
| 1    | 11.57 | 62.8    | 9   | 10/25            | K556k          | (R)I L A I G L I N E A L D E G D A Q K T L Q A L Q I P A A K (L) | 3017.6881                       | 114.0592                   | 5.2                         | 189252.9/6.08       | HUMAN   | P46940      | Ras GTPase-activating-like protein IQGAP1 OS=Homo sapiens GN=IQGAP1 PE=1 SV=1 |

Detailed Results

| Rank                   | Score | SPI (%) | BCS | # Unmatched Ions | Variable sites | Sequence                                                                | MH <sup>+</sup> Calculated (Da) | MH <sup>+</sup> Error (Da) | MH <sup>+</sup> Error (ppm) | Protein MW(pI) (Da) | Species        | Accession #    | MS-Digest Index # | Protein Name                                                                  |         |         |                |                              |                |                |         |                |         |                |                |                |                |         |                       |         |          |       |
|------------------------|-------|---------|-----|------------------|----------------|-------------------------------------------------------------------------|---------------------------------|----------------------------|-----------------------------|---------------------|----------------|----------------|-------------------|-------------------------------------------------------------------------------|---------|---------|----------------|------------------------------|----------------|----------------|---------|----------------|---------|----------------|----------------|----------------|----------------|---------|-----------------------|---------|----------|-------|
| 1                      | 11.57 | 62.8    | 9   | 10/25            | K556k          | (R) I L A I G L I N E A L D E G D A Q K T L Q / A / L Q / I P A A K (L) | 3017.6881                       | 114.0592                   | 5.2                         | 189252.9/6.08       | HUMAN          | P46940         | 321931            | Ras GTPase-activating-like protein IQGAP1 OS=Homo sapiens GN=IQGAP1 PE=1 SV=1 |         |         |                |                              |                |                |         |                |         |                |                |                |                |         |                       |         |          |       |
| Fragment-Ion (m/z)     |       |         |     |                  |                |                                                                         | 70.062                          | 84.081                     | 86.093                      | 129.094             | 170.089        | 199.181        | 218.146           | 227.176                                                                       | 244.093 | 313.177 | 343.161        | 355.239                      | 386.241        | 470.286        | 499.321 | 539.232        | 581.379 | 627.373        | 661.302        | 694.465        | 740.471        | 811.499 | 923.806 <sup>+3</sup> | 927.474 | 1031.560 |       |
| Frac. Inten.(% of TIC) |       |         |     |                  |                |                                                                         | 3.75                            | 0.14                       | 0.61                        | 2.77                | 5.20           | 7.90           | 2.88              | 5.29                                                                          | 3.44    | 3.48    | 3.37           | 3.60                         | 10.18          | 2.63           | 4.66    | 2.94           | 3.69    | 6.00           | 3.01           | 3.14           | 4.54           | 4.35    | 6.57                  | 3.03    | 2.83     |       |
| Rel. Inten.(% of BP)   |       |         |     |                  |                |                                                                         | 36.81                           | 1.35                       | 5.97                        | 27.21               | 51.06          | 77.61          | 28.28             | 52.01                                                                         | 33.84   | 34.23   | 33.10          | 35.41                        | 100.00         | 25.84          | 45.78   | 28.90          | 36.22   | 58.99          | 29.62          | 30.90          | 44.57          | 42.70   | 64.66                 | 29.79   | 27.80    |       |
| Score                  |       |         |     |                  |                |                                                                         | -0.37                           | 0.50                       | 0.22                        | -0.27               | -0.51          | 0.50           | 1.50              | 0.75                                                                          | 0.75    | 0.75    | -0.33          | 0.75                         | 1.50           | 1.50           | 1.50    | -0.29          | -0.36   | 1.50           | 1.50           | -0.30          | 0.50           | 1.50    | 1.50                  | 64.66   | 29.79    | 27.80 |
| Ion-type               |       |         |     |                  |                |                                                                         | KQ                              | LI                         |                             |                     | a <sub>2</sub> | y <sub>2</sub> | b <sub>2</sub>    | GDA                                                                           | ALQ     | LQI     | y <sub>4</sub> | y <sup>++</sup> <sub>9</sub> | y <sub>5</sub> | y <sub>5</sub> |         | y <sub>6</sub> |         | y <sub>6</sub> | b <sub>7</sub> | y <sub>7</sub> | y <sub>6</sub> |         |                       |         |          |       |
| Delta ppm              |       |         |     |                  |                |                                                                         | 7.4                             | -36.3                      |                             |                     |                | -4.5           | -17.5             | -3.5                                                                          | -2.0    | -35.5   | 11.3           | 4.2                          | 3.3            | -4.9           |         |                | -15.0   |                |                | -32.8          | 5.9            | -6.3    |                       |         |          |       |

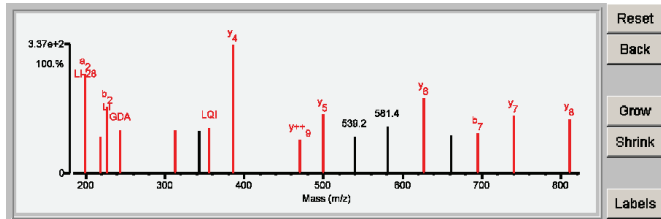

Result Summary

| Rank | Score | SPI (%) | BCS | # Unmatched ions | Variable sites | Sequence                     | MH <sup>+</sup> Calculated (Da) | MH <sup>+</sup> Error (Da) | MH <sup>+</sup> Error (ppm) | Protein MW/pI (Da) | Species | Accession # | Protein Name                                                                                  |
|------|-------|---------|-----|------------------|----------------|------------------------------|---------------------------------|----------------------------|-----------------------------|--------------------|---------|-------------|-----------------------------------------------------------------------------------------------|
| 1    | 24.24 | 94.3    | 11  | 3/25             | K147k          | (K)LTPTIYPQGLAMAKEIGAVK(Y)   | 2101.1726                       | 114.0643                   | 9.6                         | 21450.2/8.77       | HUMAN   | P63000      | Ras-related C3 botulinum toxin substrate 1 OS=Homo sapiens GN=RAC1 PE=1 SV=1                  |
| 2    | 19.57 | 89.9    | 8   | 6/25             | K153k          | (K)LTPTIYPQGLAMAKEIGAVK(Y)   | 2101.1726                       | 114.0643                   | 9.6                         | 21450.2/8.77       | HUMAN   | P63000      | Ras-related C3 botulinum toxin substrate 1 OS=Homo sapiens GN=RAC1 PE=1 SV=1                  |
| 3    | 9.55  | 63.0    | 3   | 11/25            | M1630m         | (R)ITRLPIWVTGVmTDWLQK(N)     | 2199.2358                       | 16.0010                    | 2.7                         | 192999.0/5.21      | HUMAN   | RC9UPW8     | REVERSE Protein unc-13 homolog A OS=Homo sapiens GN=UNC13A PE=2 SV=3                          |
| 4    | 8.24  | 53.6    | 4   | 19/25            | K28k           | (K)LTVAAGMLGQVLAEGTSKVVQK(A) | 2101.1686                       | 114.0683                   | 11.5                        | 35509.2/5.61       | HUMAN   | RQ75208     | REVERSE Ubiquinone biosynthesis protein COQ9, mitochondrial OS=Homo sapiens GN=COQ9 PE=1 SV=1 |
| 5    | 7.15  | 57.9    | 2   | 13/25            | None           | (R)ITPGLNLVRSQDIVSGSRFR(T)   | 2215.2306                       | 0.0063                     | 2.8                         | 69761.4/5.05       | HUMAN   | RP07911     | REVERSE Uromodulin OS=Homo sapiens GN=UMOD PE=1 SV=1                                          |

Detailed Results

| Rank                                                                                                                                                                                                                                                                                                                                                                                                                                                                                                                                                                                                                                                                                                                                                                                                                                                                                                                                                                                                                                                                                                                                                                                                                                                                                                                                                                                                                                                                                                                                                                                                                                                                                                                                                                                                                                                                                                                                                                                                                                                                                                                                                                                                                                                                                                                                                                                                                                                                                                                                                                  | Score  | SPI (%) | BCS    | # Unmatched ions | Variable sites | Sequence                                      | MH <sup>+</sup> Calculated (Da) | MH <sup>+</sup> Error (Da) | MH <sup>+</sup> Error (ppm) | Protein MW/pI (Da) | Species | Accession # | MS-Digest Index #     | Protein Name                                                                 |                       |                       |                       |                       |                       |         |                       |         |                   |                        |          |         |         |                       |         |                       |                       |                       |                       |                       |         |                       |         |         |                        |          |                         |      |      |      |      |      |      |      |      |      |      |      |      |      |      |      |      |       |       |      |      |      |      |      |      |      |                       |      |      |       |      |      |       |       |      |       |      |      |      |      |      |       |      |        |       |       |      |       |      |      |       |      |       |      |      |      |       |      |      |      |      |      |      |      |       |      |      |       |      |      |      |      |      |      |      |      |      |      |          |    |    |    |  |    |       |    |    |    |    |    |  |                  |    |  |                       |                   |                   |                   |    |                   |    |                   |                   |    |           |      |       |       |  |      |      |       |      |       |      |      |  |       |     |  |      |     |      |      |      |     |     |     |     |     |
|-----------------------------------------------------------------------------------------------------------------------------------------------------------------------------------------------------------------------------------------------------------------------------------------------------------------------------------------------------------------------------------------------------------------------------------------------------------------------------------------------------------------------------------------------------------------------------------------------------------------------------------------------------------------------------------------------------------------------------------------------------------------------------------------------------------------------------------------------------------------------------------------------------------------------------------------------------------------------------------------------------------------------------------------------------------------------------------------------------------------------------------------------------------------------------------------------------------------------------------------------------------------------------------------------------------------------------------------------------------------------------------------------------------------------------------------------------------------------------------------------------------------------------------------------------------------------------------------------------------------------------------------------------------------------------------------------------------------------------------------------------------------------------------------------------------------------------------------------------------------------------------------------------------------------------------------------------------------------------------------------------------------------------------------------------------------------------------------------------------------------------------------------------------------------------------------------------------------------------------------------------------------------------------------------------------------------------------------------------------------------------------------------------------------------------------------------------------------------------------------------------------------------------------------------------------------------|--------|---------|--------|------------------|----------------|-----------------------------------------------|---------------------------------|----------------------------|-----------------------------|--------------------|---------|-------------|-----------------------|------------------------------------------------------------------------------|-----------------------|-----------------------|-----------------------|-----------------------|-----------------------|---------|-----------------------|---------|-------------------|------------------------|----------|---------|---------|-----------------------|---------|-----------------------|-----------------------|-----------------------|-----------------------|-----------------------|---------|-----------------------|---------|---------|------------------------|----------|-------------------------|------|------|------|------|------|------|------|------|------|------|------|------|------|------|------|------|-------|-------|------|------|------|------|------|------|------|-----------------------|------|------|-------|------|------|-------|-------|------|-------|------|------|------|------|------|-------|------|--------|-------|-------|------|-------|------|------|-------|------|-------|------|------|------|-------|------|------|------|------|------|------|------|-------|------|------|-------|------|------|------|------|------|------|------|------|------|------|----------|----|----|----|--|----|-------|----|----|----|----|----|--|------------------|----|--|-----------------------|-------------------|-------------------|-------------------|----|-------------------|----|-------------------|-------------------|----|-----------|------|-------|-------|--|------|------|-------|------|-------|------|------|--|-------|-----|--|------|-----|------|------|------|-----|-----|-----|-----|-----|
| 1                                                                                                                                                                                                                                                                                                                                                                                                                                                                                                                                                                                                                                                                                                                                                                                                                                                                                                                                                                                                                                                                                                                                                                                                                                                                                                                                                                                                                                                                                                                                                                                                                                                                                                                                                                                                                                                                                                                                                                                                                                                                                                                                                                                                                                                                                                                                                                                                                                                                                                                                                                     | 24.24  | 94.3    | 11     | 3/25             | K147k          | (K) L T P I Y P Q G L A M A K E I G A V K (Y) | 2101.1726                       | 114.0643                   | 9.6                         | 21450.2/8.77       | HUMAN   | P63000      | 555171                | Ras-related C3 botulinum toxin substrate 1 OS=Homo sapiens GN=RAC1 PE=1 SV=1 |                       |                       |                       |                       |                       |         |                       |         |                   |                        |          |         |         |                       |         |                       |                       |                       |                       |                       |         |                       |         |         |                        |          |                         |      |      |      |      |      |      |      |      |      |      |      |      |      |      |      |      |       |       |      |      |      |      |      |      |      |                       |      |      |       |      |      |       |       |      |       |      |      |      |      |      |       |      |        |       |       |      |       |      |      |       |      |       |      |      |      |       |      |      |      |      |      |      |      |       |      |      |       |      |      |      |      |      |      |      |      |      |      |          |    |    |    |  |    |       |    |    |    |    |    |  |                  |    |  |                       |                   |                   |                   |    |                   |    |                   |                   |    |           |      |       |       |  |      |      |       |      |       |      |      |  |       |     |  |      |     |      |      |      |     |     |     |     |     |
| <table border="1"> <thead> <tr> <th>Fragment-Ion (m/z)</th> <th>70.065</th><th>84.079</th><th>86.096</th><th>142.120</th><th>147.112</th><th>183.149</th><th>187.143</th><th>211.145</th><th>215.136</th><th>312.190</th><th>374.237</th><th>457.247</th><th>530.788<sup>+2</sup></th><th>616.372</th><th>634.876<sup>+2</sup></th><th>661.690<sup>+3</sup></th><th>667.703<sup>+3</sup></th><th>763.919<sup>+2</sup></th><th>845.445<sup>+2</sup></th><th>858.496</th><th>895.981<sup>+2</sup></th><th>929.544</th><th>952.519</th><th>1001.046<sup>+2</sup></th><th>1060.586</th> </tr> </thead> <tbody> <tr> <td>Frac. Inten. (% of TIC)</td> <td>0.00</td><td>0.06</td><td>4.53</td><td>1.54</td><td>1.34</td><td>4.83</td><td>3.16</td><td>2.26</td><td>3.15</td><td>2.13</td><td>1.89</td><td>1.33</td><td>2.44</td><td>1.19</td><td>2.80</td><td>2.40</td><td>26.43</td><td>12.61</td><td>3.51</td><td>1.20</td><td>6.95</td><td>1.74</td><td>1.34</td><td>9.50</td><td>1.67</td> </tr> <tr> <td>Rel. Inten. (% of BP)</td> <td>0.02</td><td>0.24</td><td>17.15</td><td>5.81</td><td>5.09</td><td>18.28</td><td>11.95</td><td>8.56</td><td>11.91</td><td>8.05</td><td>7.16</td><td>5.05</td><td>9.22</td><td>4.50</td><td>10.58</td><td>9.09</td><td>100.00</td><td>47.73</td><td>13.29</td><td>4.54</td><td>26.30</td><td>6.57</td><td>5.06</td><td>35.95</td><td>6.31</td> </tr> <tr> <td>Score</td> <td>0.20</td><td>0.50</td><td>0.50</td><td>-0.06</td><td>1.50</td><td>0.50</td><td>0.50</td><td>0.75</td><td>0.75</td><td>0.75</td><td>1.50</td><td>-0.05</td><td>1.50</td><td>1.50</td><td>-0.11</td><td>0.50</td><td>1.50</td><td>1.50</td><td>1.50</td><td>1.50</td><td>1.50</td><td>1.50</td><td>1.50</td><td>1.50</td><td>1.50</td> </tr> <tr> <td>Ion-type</td> <td>PR</td><td>KQ</td><td>a1</td><td></td><td>y1</td><td>PI-28</td><td>a2</td><td>PI</td><td>b2</td><td>b3</td><td>y4</td><td></td><td>y9<sup>+2</sup></td><td>y6</td><td></td><td>Y18-H2O<sup>+3</sup></td><td>Y18<sup>+3</sup></td><td>Y14<sup>+2</sup></td><td>Y15<sup>+2</sup></td><td>Y7</td><td>Y16<sup>+2</sup></td><td>Y8</td><td>Y<sup>++17</sup></td><td>Y16<sup>+2</sup></td><td>Y9</td> </tr> <tr> <td>Delta ppm</td> <td>-6.1</td><td>-15.2</td><td>-17.7</td><td></td><td>-8.2</td><td>-4.3</td><td>-14.4</td><td>-1.0</td><td>-18.7</td><td>-9.5</td><td>-8.5</td><td></td><td>-13.4</td><td>8.4</td><td></td><td>-8.8</td><td>5.2</td><td>-3.8</td><td>-9.3</td><td>-9.5</td><td>4.5</td><td>3.0</td><td>0.3</td><td>0.6</td><td>4.0</td> </tr> </tbody> </table> |        |         |        |                  |                |                                               |                                 |                            |                             |                    |         |             |                       |                                                                              | Fragment-Ion (m/z)    | 70.065                | 84.079                | 86.096                | 142.120               | 147.112 | 183.149               | 187.143 | 211.145           | 215.136                | 312.190  | 374.237 | 457.247 | 530.788 <sup>+2</sup> | 616.372 | 634.876 <sup>+2</sup> | 661.690 <sup>+3</sup> | 667.703 <sup>+3</sup> | 763.919 <sup>+2</sup> | 845.445 <sup>+2</sup> | 858.496 | 895.981 <sup>+2</sup> | 929.544 | 952.519 | 1001.046 <sup>+2</sup> | 1060.586 | Frac. Inten. (% of TIC) | 0.00 | 0.06 | 4.53 | 1.54 | 1.34 | 4.83 | 3.16 | 2.26 | 3.15 | 2.13 | 1.89 | 1.33 | 2.44 | 1.19 | 2.80 | 2.40 | 26.43 | 12.61 | 3.51 | 1.20 | 6.95 | 1.74 | 1.34 | 9.50 | 1.67 | Rel. Inten. (% of BP) | 0.02 | 0.24 | 17.15 | 5.81 | 5.09 | 18.28 | 11.95 | 8.56 | 11.91 | 8.05 | 7.16 | 5.05 | 9.22 | 4.50 | 10.58 | 9.09 | 100.00 | 47.73 | 13.29 | 4.54 | 26.30 | 6.57 | 5.06 | 35.95 | 6.31 | Score | 0.20 | 0.50 | 0.50 | -0.06 | 1.50 | 0.50 | 0.50 | 0.75 | 0.75 | 0.75 | 1.50 | -0.05 | 1.50 | 1.50 | -0.11 | 0.50 | 1.50 | 1.50 | 1.50 | 1.50 | 1.50 | 1.50 | 1.50 | 1.50 | 1.50 | Ion-type | PR | KQ | a1 |  | y1 | PI-28 | a2 | PI | b2 | b3 | y4 |  | y9 <sup>+2</sup> | y6 |  | Y18-H2O <sup>+3</sup> | Y18 <sup>+3</sup> | Y14 <sup>+2</sup> | Y15 <sup>+2</sup> | Y7 | Y16 <sup>+2</sup> | Y8 | Y <sup>++17</sup> | Y16 <sup>+2</sup> | Y9 | Delta ppm | -6.1 | -15.2 | -17.7 |  | -8.2 | -4.3 | -14.4 | -1.0 | -18.7 | -9.5 | -8.5 |  | -13.4 | 8.4 |  | -8.8 | 5.2 | -3.8 | -9.3 | -9.5 | 4.5 | 3.0 | 0.3 | 0.6 | 4.0 |
| Fragment-Ion (m/z)                                                                                                                                                                                                                                                                                                                                                                                                                                                                                                                                                                                                                                                                                                                                                                                                                                                                                                                                                                                                                                                                                                                                                                                                                                                                                                                                                                                                                                                                                                                                                                                                                                                                                                                                                                                                                                                                                                                                                                                                                                                                                                                                                                                                                                                                                                                                                                                                                                                                                                                                                    | 70.065 | 84.079  | 86.096 | 142.120          | 147.112        | 183.149                                       | 187.143                         | 211.145                    | 215.136                     | 312.190            | 374.237 | 457.247     | 530.788 <sup>+2</sup> | 616.372                                                                      | 634.876 <sup>+2</sup> | 661.690 <sup>+3</sup> | 667.703 <sup>+3</sup> | 763.919 <sup>+2</sup> | 845.445 <sup>+2</sup> | 858.496 | 895.981 <sup>+2</sup> | 929.544 | 952.519           | 1001.046 <sup>+2</sup> | 1060.586 |         |         |                       |         |                       |                       |                       |                       |                       |         |                       |         |         |                        |          |                         |      |      |      |      |      |      |      |      |      |      |      |      |      |      |      |      |       |       |      |      |      |      |      |      |      |                       |      |      |       |      |      |       |       |      |       |      |      |      |      |      |       |      |        |       |       |      |       |      |      |       |      |       |      |      |      |       |      |      |      |      |      |      |      |       |      |      |       |      |      |      |      |      |      |      |      |      |      |          |    |    |    |  |    |       |    |    |    |    |    |  |                  |    |  |                       |                   |                   |                   |    |                   |    |                   |                   |    |           |      |       |       |  |      |      |       |      |       |      |      |  |       |     |  |      |     |      |      |      |     |     |     |     |     |
| Frac. Inten. (% of TIC)                                                                                                                                                                                                                                                                                                                                                                                                                                                                                                                                                                                                                                                                                                                                                                                                                                                                                                                                                                                                                                                                                                                                                                                                                                                                                                                                                                                                                                                                                                                                                                                                                                                                                                                                                                                                                                                                                                                                                                                                                                                                                                                                                                                                                                                                                                                                                                                                                                                                                                                                               | 0.00   | 0.06    | 4.53   | 1.54             | 1.34           | 4.83                                          | 3.16                            | 2.26                       | 3.15                        | 2.13               | 1.89    | 1.33        | 2.44                  | 1.19                                                                         | 2.80                  | 2.40                  | 26.43                 | 12.61                 | 3.51                  | 1.20    | 6.95                  | 1.74    | 1.34              | 9.50                   | 1.67     |         |         |                       |         |                       |                       |                       |                       |                       |         |                       |         |         |                        |          |                         |      |      |      |      |      |      |      |      |      |      |      |      |      |      |      |      |       |       |      |      |      |      |      |      |      |                       |      |      |       |      |      |       |       |      |       |      |      |      |      |      |       |      |        |       |       |      |       |      |      |       |      |       |      |      |      |       |      |      |      |      |      |      |      |       |      |      |       |      |      |      |      |      |      |      |      |      |      |          |    |    |    |  |    |       |    |    |    |    |    |  |                  |    |  |                       |                   |                   |                   |    |                   |    |                   |                   |    |           |      |       |       |  |      |      |       |      |       |      |      |  |       |     |  |      |     |      |      |      |     |     |     |     |     |
| Rel. Inten. (% of BP)                                                                                                                                                                                                                                                                                                                                                                                                                                                                                                                                                                                                                                                                                                                                                                                                                                                                                                                                                                                                                                                                                                                                                                                                                                                                                                                                                                                                                                                                                                                                                                                                                                                                                                                                                                                                                                                                                                                                                                                                                                                                                                                                                                                                                                                                                                                                                                                                                                                                                                                                                 | 0.02   | 0.24    | 17.15  | 5.81             | 5.09           | 18.28                                         | 11.95                           | 8.56                       | 11.91                       | 8.05               | 7.16    | 5.05        | 9.22                  | 4.50                                                                         | 10.58                 | 9.09                  | 100.00                | 47.73                 | 13.29                 | 4.54    | 26.30                 | 6.57    | 5.06              | 35.95                  | 6.31     |         |         |                       |         |                       |                       |                       |                       |                       |         |                       |         |         |                        |          |                         |      |      |      |      |      |      |      |      |      |      |      |      |      |      |      |      |       |       |      |      |      |      |      |      |      |                       |      |      |       |      |      |       |       |      |       |      |      |      |      |      |       |      |        |       |       |      |       |      |      |       |      |       |      |      |      |       |      |      |      |      |      |      |      |       |      |      |       |      |      |      |      |      |      |      |      |      |      |          |    |    |    |  |    |       |    |    |    |    |    |  |                  |    |  |                       |                   |                   |                   |    |                   |    |                   |                   |    |           |      |       |       |  |      |      |       |      |       |      |      |  |       |     |  |      |     |      |      |      |     |     |     |     |     |
| Score                                                                                                                                                                                                                                                                                                                                                                                                                                                                                                                                                                                                                                                                                                                                                                                                                                                                                                                                                                                                                                                                                                                                                                                                                                                                                                                                                                                                                                                                                                                                                                                                                                                                                                                                                                                                                                                                                                                                                                                                                                                                                                                                                                                                                                                                                                                                                                                                                                                                                                                                                                 | 0.20   | 0.50    | 0.50   | -0.06            | 1.50           | 0.50                                          | 0.50                            | 0.75                       | 0.75                        | 0.75               | 1.50    | -0.05       | 1.50                  | 1.50                                                                         | -0.11                 | 0.50                  | 1.50                  | 1.50                  | 1.50                  | 1.50    | 1.50                  | 1.50    | 1.50              | 1.50                   | 1.50     |         |         |                       |         |                       |                       |                       |                       |                       |         |                       |         |         |                        |          |                         |      |      |      |      |      |      |      |      |      |      |      |      |      |      |      |      |       |       |      |      |      |      |      |      |      |                       |      |      |       |      |      |       |       |      |       |      |      |      |      |      |       |      |        |       |       |      |       |      |      |       |      |       |      |      |      |       |      |      |      |      |      |      |      |       |      |      |       |      |      |      |      |      |      |      |      |      |      |          |    |    |    |  |    |       |    |    |    |    |    |  |                  |    |  |                       |                   |                   |                   |    |                   |    |                   |                   |    |           |      |       |       |  |      |      |       |      |       |      |      |  |       |     |  |      |     |      |      |      |     |     |     |     |     |
| Ion-type                                                                                                                                                                                                                                                                                                                                                                                                                                                                                                                                                                                                                                                                                                                                                                                                                                                                                                                                                                                                                                                                                                                                                                                                                                                                                                                                                                                                                                                                                                                                                                                                                                                                                                                                                                                                                                                                                                                                                                                                                                                                                                                                                                                                                                                                                                                                                                                                                                                                                                                                                              | PR     | KQ      | a1     |                  | y1             | PI-28                                         | a2                              | PI                         | b2                          | b3                 | y4      |             | y9 <sup>+2</sup>      | y6                                                                           |                       | Y18-H2O <sup>+3</sup> | Y18 <sup>+3</sup>     | Y14 <sup>+2</sup>     | Y15 <sup>+2</sup>     | Y7      | Y16 <sup>+2</sup>     | Y8      | Y <sup>++17</sup> | Y16 <sup>+2</sup>      | Y9       |         |         |                       |         |                       |                       |                       |                       |                       |         |                       |         |         |                        |          |                         |      |      |      |      |      |      |      |      |      |      |      |      |      |      |      |      |       |       |      |      |      |      |      |      |      |                       |      |      |       |      |      |       |       |      |       |      |      |      |      |      |       |      |        |       |       |      |       |      |      |       |      |       |      |      |      |       |      |      |      |      |      |      |      |       |      |      |       |      |      |      |      |      |      |      |      |      |      |          |    |    |    |  |    |       |    |    |    |    |    |  |                  |    |  |                       |                   |                   |                   |    |                   |    |                   |                   |    |           |      |       |       |  |      |      |       |      |       |      |      |  |       |     |  |      |     |      |      |      |     |     |     |     |     |
| Delta ppm                                                                                                                                                                                                                                                                                                                                                                                                                                                                                                                                                                                                                                                                                                                                                                                                                                                                                                                                                                                                                                                                                                                                                                                                                                                                                                                                                                                                                                                                                                                                                                                                                                                                                                                                                                                                                                                                                                                                                                                                                                                                                                                                                                                                                                                                                                                                                                                                                                                                                                                                                             | -6.1   | -15.2   | -17.7  |                  | -8.2           | -4.3                                          | -14.4                           | -1.0                       | -18.7                       | -9.5               | -8.5    |             | -13.4                 | 8.4                                                                          |                       | -8.8                  | 5.2                   | -3.8                  | -9.3                  | -9.5    | 4.5                   | 3.0     | 0.3               | 0.6                    | 4.0      |         |         |                       |         |                       |                       |                       |                       |                       |         |                       |         |         |                        |          |                         |      |      |      |      |      |      |      |      |      |      |      |      |      |      |      |      |       |       |      |      |      |      |      |      |      |                       |      |      |       |      |      |       |       |      |       |      |      |      |      |      |       |      |        |       |       |      |       |      |      |       |      |       |      |      |      |       |      |      |      |      |      |      |      |       |      |      |       |      |      |      |      |      |      |      |      |      |      |          |    |    |    |  |    |       |    |    |    |    |    |  |                  |    |  |                       |                   |                   |                   |    |                   |    |                   |                   |    |           |      |       |       |  |      |      |       |      |       |      |      |  |       |     |  |      |     |      |      |      |     |     |     |     |     |

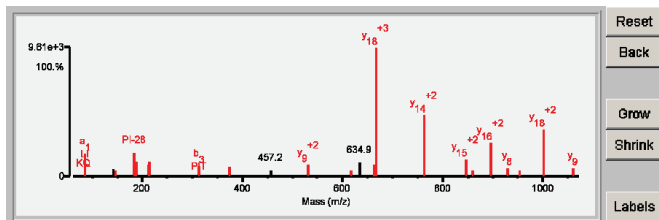

Result Summary

| Rank | Score | SPI (%) | BCS | # Unmatched Ions | Variable sites | Sequence                  | MH <sup>+</sup> Calculated (Da) | MH <sup>+</sup> Error (Da) | MH <sup>+</sup> Error (ppm) | Protein MW/pI (Da) | Species | Accession # | Protein Name                                                          |
|------|-------|---------|-----|------------------|----------------|---------------------------|---------------------------------|----------------------------|-----------------------------|--------------------|---------|-------------|-----------------------------------------------------------------------|
| 1    | 15.80 | 80.8    | 8   | 6/24             | K165k          | (K)TASNVEEAFINTAKEIYEK(I) | 2157.0710                       | 114.0630                   | 8.9                         | 23545.7/6.08       | HUMAN   | P61019      | Ras-related protein Rab-2A OS=Homo sapiens GN=RAB2A PE=1 SV=1         |
| 2    | 12.98 | 76.4    | 6   | 7/24             | K170k          | (K)TASNVEEAFINTAKEIYEK(I) | 2157.0710                       | 114.0630                   | 8.9                         | 23545.7/6.08       | HUMAN   | P61019      | Ras-related protein Rab-2A OS=Homo sapiens GN=RAB2A PE=1 SV=1         |
| 3    | 4.82  | 50.5    | 2   | 13/24            | K62k           | (K)EYIEKATNIFAEVNSATK(A)  | 2157.0710                       | 114.0630                   | 8.9                         | 23545.7/6.10       | HUMAN   | RP61019     | REVERSE Ras-related protein Rab-2A OS=Homo sapiens GN=RAB2A PE=1 SV=1 |

Detailed Results

| Rank | Score | SPI (%) | BCS | # Unmatched Ions | Variable sites | Sequence                  | MH <sup>+</sup> Calculated (Da) | MH <sup>+</sup> Error (Da) | MH <sup>+</sup> Error (ppm) | Protein MW/pI (Da) | Species | Accession # | MS-Digest Index # | Protein Name                                                  |
|------|-------|---------|-----|------------------|----------------|---------------------------|---------------------------------|----------------------------|-----------------------------|--------------------|---------|-------------|-------------------|---------------------------------------------------------------|
| 1    | 15.80 | 80.8    | 8   | 6/24             | K165k          | (K)TASNVEEAFINTAKEIYEK(I) | 2157.0710                       | 114.0630                   | 8.9                         | 23545.7/6.08       | HUMAN   | P61019      | 554681            | Ras-related protein Rab-2A OS=Homo sapiens GN=RAB2A PE=1 SV=1 |

  

| Fragment-ion (m/z)     | 58.063 | 74.062 | 84.081 | 86.094 | 145.095 | 173.092 | 202.082 | 329.176 | 374.168 | 407.197             | 439.223 | 455.236 | 473.238 | 605.314*2 | 635.396 | 771.418*2              | 835.426*2 | 842.894*2 | 890.927*2 | 899.947*2 | 923.483 | 1050.003*2 | 1063.577 | 1209.563 |
|------------------------|--------|--------|--------|--------|---------|---------|---------|---------|---------|---------------------|---------|---------|---------|-----------|---------|------------------------|-----------|-----------|-----------|-----------|---------|------------|----------|----------|
| Frac. Inten.(% of TIC) | 3.08   | 3.19   | 0.21   | 0.15   | 9.28    | 13.56   | 3.93    | 3.14    | 3.47    | 3.18                | 4.37    | 5.53    | 3.03    | 4.72      | 3.17    | 3.75                   | 3.99      | 3.04      | 3.86      | 3.58      | 4.19    | 7.11       | 3.00     | 3.46     |
| Rel. Inten.(% of BP)   | 22.69  | 23.53  | 1.58   | 1.07   | 68.45   | 100.00  | 28.99   | 23.13   | 25.62   | 23.47               | 32.25   | 40.79   | 22.31   | 34.81     | 23.39   | 27.69                  | 29.40     | 22.40     | 28.50     | 26.38     | 30.91   | 52.44      | 22.11    | 25.54    |
| Score                  | -0.23  | 1.50   | 0.50   | 0.22   | 0.50    | 0.75    | 0.75    | 0.75    | 0.50    | -0.23               | 1.50    | 0.25    | 0.50    | 1.50      | -0.23   | -0.28                  | 1.50      | -0.22     | 0.50      | 1.50      | 1.50    | 1.50       | -0.22    | 1.50     |
| Ion-type               | a1     | KQ     | LI     | a2     | b2      | SN      | INT     | b4      | y3      | b5-H <sub>2</sub> O | b5      | y9      | y9+2    | y13       | y13+2   | y14-H <sub>2</sub> O+2 | y14       | y14+2     | y14+2     | y14+2     | y17     | y17+2      | y9       | y9       |
| Delta ppm              | 11.6   | 1.5    | -32.8  | -21.0  | -6.7    | -6.6    | -22.3   | -0.1    | 10.6    | 20.9                | 3.9     | 8.5     | 1.3     |           |         |                        |           |           |           |           |         |            |          |          |

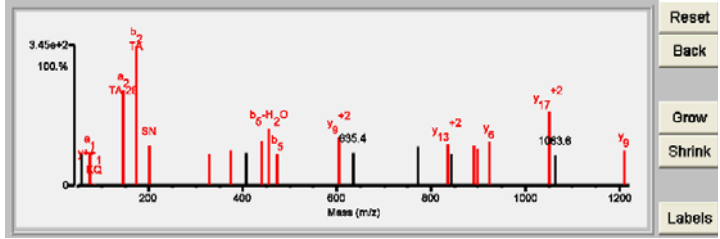

Result Summary

| Rank | Score | SPI (%) | BCS | Unmatched Ions | # Variable sites | Sequence                   | MH <sup>+</sup> Calculated (Da) | MH <sup>+</sup> Error (Da) | MH <sup>+</sup> Error (ppm) | Protein MW/pI (Da) | Species | Accession # | Protein Name                                                                       |
|------|-------|---------|-----|----------------|------------------|----------------------------|---------------------------------|----------------------------|-----------------------------|--------------------|---------|-------------|------------------------------------------------------------------------------------|
| 1    | 19.33 | 88.6    | 7   | 5/25           | K410k            | (R)SLVLSSTIANPDIPEAYKLR(G) | 2474.3501                       | 114.0580                   | 5.8                         | 68138.6/6.91       | HUMAN   | P27694      | Replication protein A 70 kDa DNA-binding subunit OS=Homo sapiens GN=RPA1 PE=1 SV=2 |

Detailed Results

| Rank                    | Score  | SPI (%) | BCS    | Unmatched Ions | # Variable sites | Sequence                                                       | MH <sup>+</sup> Calculated (Da) | MH <sup>+</sup> Error (Da) | MH <sup>+</sup> Error (ppm) | Protein MW/pI (Da) | Species          | Accession #      | MS-Digest Index # | Protein Name                                                                       |                       |                       |         |                       |                   |                        |                   |                        |          |          |          |
|-------------------------|--------|---------|--------|----------------|------------------|----------------------------------------------------------------|---------------------------------|----------------------------|-----------------------------|--------------------|------------------|------------------|-------------------|------------------------------------------------------------------------------------|-----------------------|-----------------------|---------|-----------------------|-------------------|------------------------|-------------------|------------------------|----------|----------|----------|
| 1                       | 19.33  | 88.6    | 7      | 5/25           | K410k            | (R)S L I S V L / S S S T I I A / N / P D I / P E A Y K L R (G) | 2474.3501                       | 114.0580                   | 5.8                         | 68138.6/6.91       | HUMAN            | P27694           | 286352            | Replication protein A 70 kDa DNA-binding subunit OS=Homo sapiens GN=RPA1 PE=1 SV=2 |                       |                       |         |                       |                   |                        |                   |                        |          |          |          |
| Fragment-ion (m/z)      | 70.065 | 86.093  | 87.054 | 173.126        | 201.123          | 213.085                                                        | 270.148                         | 288.190                    | 369.211                     | 387.221            | 438.250          | 440.208          | 458.219           | 495.765 <sup>+2</sup>                                                              | 658.347 <sup>+2</sup> | 715.377 <sup>+2</sup> | 773.430 | 940.520 <sup>+2</sup> | 990.534           | 1045.055 <sup>+2</sup> | 1101.592          | 1194.629 <sup>+2</sup> | 1315.689 | 1429.744 | 1500.778 |
| Frac. Inten. (% of TIC) | 0.00   | 0.23    | 0.08   | 8.00           | 4.97             | 4.21                                                           | 3.69                            | 2.40                       | 7.59                        | 3.69               | 4.95             | 2.80             | 2.24              | 6.86                                                                               | 5.78                  | 2.01                  | 2.80    | 2.00                  | 16.92             | 5.47                   | 4.45              | 2.03                   | 4.23     | 2.28     | 3.31     |
| Rel. Inten. (% of BP)   | 0.01   | 1.35    | 0.49   | 47.30          | 29.37            | 24.91                                                          | 21.79                           | 14.20                      | 44.87                       | 21.82              | 11.50            | 16.54            | 13.23             | 40.55                                                                              | 34.13                 | 11.86                 | 16.53   | 11.85                 | 100.00            | 32.31                  | 26.31             | 12.01                  | 24.97    | 13.50    | 19.55    |
| Score                   | 0.20   | 0.22    | 0.33   | 0.50           | 0.75             | 0.75                                                           | 0.75                            | -0.14                      | 0.50                        | 0.75               | -0.11            | 0.75             | -0.13             | 1.50                                                                               | 1.50                  | 1.50                  | -0.17   | -0.12                 | 1.50              | 1.50                   | 1.50              | 1.50                   | 1.50     | 1.50     | 1.50     |
| Ion-type                | PR     | LI      | NR     | a2             | b2               | PD                                                             | b3-H2O                          | b4-H2O                     | b4                          | NPDI               | y7 <sup>+2</sup> | y7 <sup>+2</sup> | y10 <sup>+2</sup> | y11 <sup>+2</sup>                                                                  | y18 <sup>+2</sup>     | y18 <sup>+2</sup>     | y7      | y7                    | y18 <sup>+2</sup> | y18 <sup>+2</sup>      | y18 <sup>+2</sup> | y21 <sup>+2</sup>      | y10      | y10      | y12      |
| Delta ppm               | 2.5    | -39.8   | -11.4  | LS-28          | LS               | LS                                                             | LS                              | LS                         | LS                          | LS                 | LS               | LS               | LS                | LS                                                                                 | LS                    | LS                    | LS      | LS                    | LS                | LS                     | LS                | LS                     | LS       | LS       | LS       |

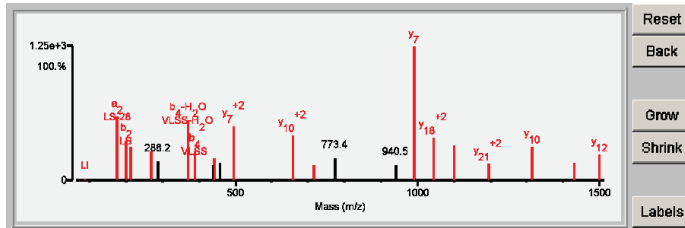

Reset

Back

Grow

Shrink

Labels

Result Summary

| Rank | Score | SPI (%) | BCS | # Unmatched Ions | Variable sites | Sequence             | MH <sup>+</sup> Calculated (Da) | MH <sup>+</sup> Error (Da) | MH <sup>+</sup> Error (ppm) | Protein MW/pi (Da) | Species | Accession # | Protein Name                                                          |
|------|-------|---------|-----|------------------|----------------|----------------------|---------------------------------|----------------------------|-----------------------------|--------------------|---------|-------------|-----------------------------------------------------------------------|
| 1    | 13.12 | 69.0    | 7   | 9/24             | K141k          | (K)IDKTDYMGVSGYGR(A) | 1601.7628                       | 114.0508                   | 4.6                         | 23207.2/5.02       | HUMAN   | P52565      | Rho GDP-dissociation inhibitor 1 OS=Homo sapiens GN=ARHGDI1 PE=1 SV=3 |

Detailed Results

| Rank                    | Score  | SPI (%) | BCS    | # Unmatched Ions | Variable sites | Sequence                                       | MH <sup>+</sup> Calculated (Da) | MH <sup>+</sup> Error (Da) | MH <sup>+</sup> Error (ppm) | Protein MW/pi (Da) | Species | Accession # | MS-Digest Index # | Protein Name                                                          |         |         |         |         |         |         |         |         |         |         |
|-------------------------|--------|---------|--------|------------------|----------------|------------------------------------------------|---------------------------------|----------------------------|-----------------------------|--------------------|---------|-------------|-------------------|-----------------------------------------------------------------------|---------|---------|---------|---------|---------|---------|---------|---------|---------|---------|
| 1                       | 13.12  | 69.0    | 7      | 9/24             | K141k          | (K)I D k T D Y I M I V G / S / Y / G P / R (A) | 1601.7628                       | 114.0508                   | 4.6                         | 23207.2/5.02       | HUMAN   | P52565      | 242757            | Rho GDP-dissociation inhibitor 1 OS=Homo sapiens GN=ARHGDI1 PE=1 SV=3 |         |         |         |         |         |         |         |         |         |         |
| Fragment-Ion (m/z)      | 70.064 | 72.081  | 84.081 | 86.096           | 104.053        | 119.045                                        | 136.073                         | 175.118                    | 183.118                     | 191.122            | 312.164 | 329.190     | 339.169           | 416.203 <sup>22</sup>                                                 | 430.717 | 492.259 | 509.279 | 579.282 | 618.293 | 636.309 | 735.386 | 850.391 | 866.407 | 981.440 |
| Frac. Inten. (% of TIC) | 0.00   | 0.43    | 8.84   | 7.88             | 7.49           | 2.78                                           | 0.14                            | 1.81                       | 1.90                        | 2.07               | 3.30    | 3.32        | 1.93              | 2.06                                                                  | 2.05    | 3.47    | 1.90    | 3.65    | 5.13    | 19.68   | 9.97    | 3.30    | 2.12    | 4.76    |
| Rel. Inten. (% of BP)   | 0.02   | 2.20    | 44.91  | 40.04            | 38.08          | 14.14                                          | 0.70                            | 9.20                       | 9.66                        | 10.51              | 16.74   | 16.87       | 9.81              | 10.48                                                                 | 10.40   | 17.64   | 9.67    | 18.53   | 26.07   | 100.00  | 50.67   | 16.74   | 10.77   | 24.20   |
| Score                   | 0.20   | 0.50    | -0.45  | 0.50             | -0.38          | -0.14                                          | 1.00                            | 1.50                       | -0.10                       | -0.11              | 0.50    | 1.50        | -0.10             | -0.10                                                                 | -0.10   | 1.50    | -0.10   | 1.50    | 0.50    | 1.50    | 1.50    | 0.50    | 1.50    | 0.50    |
| Ion-type                | PR     | V       | a1     |                  |                | Y                                              | Y1                              |                            |                             |                    | y3-NH3  | y3          |                   |                                                                       |         | y4      |         | y5      | y6-H2O  | y6      | y7      | b6      | y8      | b7      |
| Delta ppm               | -18.9  | -1.0    |        | -21.2            |                |                                                | -19.8                           | -7.7                       |                             |                    | -7.5    | -8.1        |                   |                                                                       |         | 5.1     |         | -11.8   | -10.1   | -0.9    | 9.9     | -5.2    | -13.3   | 4.1     |

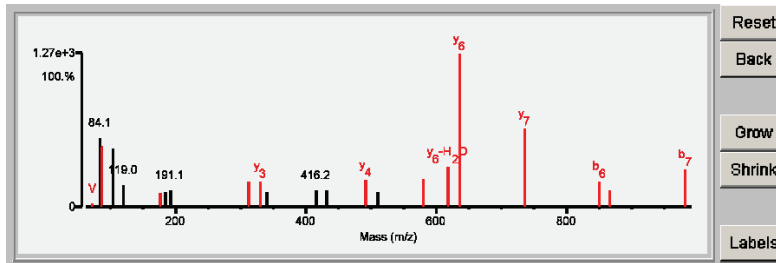

Result Summary

| Rank | Score | SPI (%) | BCS | # Unmatched Ions | Variable sites | Sequence                   | MH <sup>+</sup> Calculated (Da) | MH <sup>+</sup> Error (Da) | MH <sup>+</sup> Error (ppm) | Protein MW/pl (Da) | Species | Accession # | Protein Name                                       |
|------|-------|---------|-----|------------------|----------------|----------------------------|---------------------------------|----------------------------|-----------------------------|--------------------|---------|-------------|----------------------------------------------------|
| 1    | 15.83 | 78.7    | 10  | 5/25             | K157k          | (K)CSVCPDYDLCSVCEGKGLHR(G) | 2412.0199                       | 114.0638                   | 8.3                         | 47687.5/5.10       | HUMAN   | Q13501      | Sequestosome-1 OS=Homo sapiens GN=SQSTM1 PE=1 SV=1 |

Detailed Results

| Rank                   | Score  | SPI (%) | BCS    | # Unmatched Ions | Variable sites | Sequence                                       | MH <sup>+</sup> Calculated (Da) | MH <sup>+</sup> Error (Da) | MH <sup>+</sup> Error (ppm) | Protein MW/pl (Da)               | Species               | Accession # | MS-Digest Index # | Protein Name                                       |                   |                   |                   |                   |                   |                       |                       |                   |                   |                   |          |
|------------------------|--------|---------|--------|------------------|----------------|------------------------------------------------|---------------------------------|----------------------------|-----------------------------|----------------------------------|-----------------------|-------------|-------------------|----------------------------------------------------|-------------------|-------------------|-------------------|-------------------|-------------------|-----------------------|-----------------------|-------------------|-------------------|-------------------|----------|
| 1                      | 15.83  | 78.7    | 10     | 5/25             | K157k          | (K)C S V C P D Y D L C S V C E G K G L H R (G) | 2412.0199                       | 114.0638                   | 8.3                         | 47687.5/5.10                     | HUMAN                 | Q13501      | 731137            | Sequestosome-1 OS=Homo sapiens GN=SQSTM1 PE=1 SV=1 |                   |                   |                   |                   |                   |                       |                       |                   |                   |                   |          |
| Fragment-ion (m/z)     | 70.065 | 72.081  | 84.079 | 86.096           | 133.042        | 136.076                                        | 175.118                         | 213.087                    | 248.067                     | 279.094                          | 312.170 <sup>+2</sup> | 329.123     | 347.142           | 364.159                                            | 373.125           | 491.174           | 507.157           | 536.255           | 585.290           | 708.831 <sup>+2</sup> | 766.859 <sup>+2</sup> | 781.425           | 822.872           | 997.341           | 1070.514 |
| Frac. Inten.(% of TIC) | 0.01   | 0.17    | 6.61   | 0.38             | 7.27           | 0.30                                           | 4.50                            | 3.02                       | 3.35                        | 3.29                             | 2.81                  | 6.69        | 5.91              | 3.25                                               | 3.58              | 5.21              | 6.02              | 4.32              | 3.80              | 11.52                 | 4.27                  | 3.58              | 2.76              | 2.93              | 4.44     |
| Rel. Inten.(% of BP)   | 0.05   | 1.52    | 57.40  | 3.32             | 63.11          | 2.56                                           | 39.09                           | 26.24                      | 28.58                       | 24.36                            | 58.05                 | 51.32       | 28.25             | 31.04                                              | 45.27             | 52.23             | 37.54             | 32.95             | 100.00            | 37.06                 | 31.11                 | 23.92             | 25.41             | 38.54             |          |
| Score                  | 0.20   | 0.50    | -0.57  | 0.22             | 0.50           | 1.00                                           | 1.50                            | 0.75                       | 0.75                        | 0.75                             | -0.24                 | 0.50        | 0.75              | -0.28                                              | 0.75              | 0.75              | 0.75              | 1.50              | 1.50              | 1.50                  | 1.50                  | 1.50              | 0.50              | 1.50              |          |
| Ion-type               | PR     | V       | LI     | a <sub>1</sub>   | Y              | Y <sub>1</sub>                                 | PD                              | b <sub>2</sub>             | YD                          | b <sub>3</sub> -H <sub>2</sub> O | b <sub>3</sub>        | CPD         | PDYD              | b <sub>4</sub>                                     | y <sup>++</sup> 3 | y <sup>++</sup> 3 | y <sup>++</sup> 3 | y <sup>++</sup> 3 | y <sup>++</sup> 3 | y <sup>++</sup> 3     | y <sup>++</sup> 3     | y <sup>++</sup> 3 | y <sup>++</sup> 3 | y <sup>++</sup> 3 |          |
| Delta ppm              | 1.1    | 0.3     |        | -3.8             | -12.1          | -1.4                                           | -3.7                            | -5.5                       | -17.9                       | -16.6                            |                       |             |                   |                                                    |                   |                   |                   |                   |                   |                       |                       |                   |                   |                   |          |
|                        |        |         |        |                  |                |                                                |                                 |                            | CS                          | SVC                              | SVC                   |             |                   |                                                    |                   |                   |                   |                   |                   |                       |                       |                   |                   |                   |          |
|                        |        |         |        |                  |                |                                                |                                 |                            | -17.9                       |                                  |                       |             |                   |                                                    |                   |                   |                   |                   |                   |                       |                       |                   |                   |                   |          |

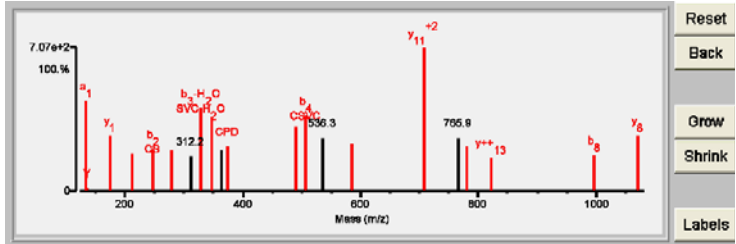



Result Summary

| Rank | Score | SPI (%) | BCS | # Unmatched Ions | Variable sites | Sequence                   | MH <sup>+</sup> Calculated (Da) | MH <sup>+</sup> Error (Da) | MH <sup>+</sup> Error (ppm) | Protein MW/PI (Da) | Species | Accession # | Protein Name                                       |
|------|-------|---------|-----|------------------|----------------|----------------------------|---------------------------------|----------------------------|-----------------------------|--------------------|---------|-------------|----------------------------------------------------|
| 1    | 22.12 | 91.7    | 12  | 4/25             | K435k          | (K)NYDIGAALDTIQYskHPPPL(-) | 2213.1237                       | 114.0680                   | 10.8                        | 47687.5/5.10       | HUMAN   | Q13501      | Sequestosome-1 OS=Homo sapiens GN=SQSTM1 PE=1 SV=1 |

Detailed Results

| Rank                    | Score  | SPI (%) | BCS    | # Unmatched Ions | Variable sites | Sequence                                         | MH <sup>+</sup> Calculated (Da) | MH <sup>+</sup> Error (Da) | MH <sup>+</sup> Error (ppm) | Protein MW/PI (Da) | Species | Accession # | MS-Digest Index # | Protein Name                                       |                       |                       |                       |                   |                       |                       |                        |                        |                   |                        |          |       |
|-------------------------|--------|---------|--------|------------------|----------------|--------------------------------------------------|---------------------------------|----------------------------|-----------------------------|--------------------|---------|-------------|-------------------|----------------------------------------------------|-----------------------|-----------------------|-----------------------|-------------------|-----------------------|-----------------------|------------------------|------------------------|-------------------|------------------------|----------|-------|
| 1                       | 22.12  | 91.7    | 12     | 4/25             | K435k          | (K)N Y I D I G A A L D T I Q Y S K H P P P L (-) | 2213.1237                       | 114.0680                   | 10.8                        | 47687.5/5.10       | HUMAN   | Q13501      | 731137            | Sequestosome-1 OS=Homo sapiens GN=SQSTM1 PE=1 SV=1 |                       |                       |                       |                   |                       |                       |                        |                        |                   |                        |          |       |
| Fragment-ion (m/z)      | 86.095 | 87.055  | 88.038 | 136.075          | 250.118        | 251.121                                          | 261.088                         | 278.114                    | 279.112                     | 326.206            | 393.145 | 423.259     | 428.215           | 560.319                                            | 811.926 <sup>+2</sup> | 847.454 <sup>+2</sup> | 882.986 <sup>+2</sup> | 889.507           | 911.476 <sup>+2</sup> | 968.040 <sup>+2</sup> | 1016.499 <sup>+2</sup> | 1025.553 <sup>+2</sup> | 1052.549          | 1112.055 <sup>+2</sup> | 1180.615 |       |
| Frac. Inten. (% of TIC) | 0.11   | 1.28    | 2.96   | 0.16             | 11.41          | 1.63                                             | 3.41                            | 7.62                       | 2.13                        | 2.76               | 7.20    | 8.22        | 1.99              | 1.69                                               | 12.28                 | 13.16                 | 25.79                 | 20.94             | 18.29                 | 100.00                | 34.84                  | 16.41                  | 70.51             | 15.53                  | 11.72    | 17.06 |
| Rel. Inten. (% of BP)   | 0.83   | 9.30    | 21.45  | 1.18             | 82.79          | 11.86                                            | 24.74                           | 55.32                      | 15.47                       | 20.00              | 52.22   | 59.69       | 14.41             | 12.28                                              | 13.16                 | 25.79                 | 20.94                 | 18.29             | 100.00                | 34.84                 | 16.41                  | 70.51                  | 15.53             | 11.72                  | 17.06    |       |
| Score                   | 0.22   | 0.50    | -0.21  | 1.00             | 0.50           | -0.12                                            | 0.25                            | 0.50                       | -0.15                       | 1.50               | 0.50    | 1.50        | 0.75              | 1.50                                               | 1.50                  | 1.50                  | 1.50                  | 1.50              | 1.50                  | 1.50                  | 1.50                   | 0.50                   | 1.50              | 1.50                   | -0.12    | 1.50  |
| Ion-type                | LI     | a1      | Y      | a2               | b2             | b2-NH3                                           | b2                              | y3                         | b3                          | y4                 | GAALD   | y5          | y13 <sup>+2</sup> | y14 <sup>+2</sup>                                  | y15 <sup>+2</sup>     | y7                    | y16 <sup>+2</sup>     | y17 <sup>+2</sup> | y18-H2O <sup>+2</sup> | y18 <sup>+2</sup>     | y8                     | y9                     | y18 <sup>+2</sup> | y8                     | y9       |       |
| Delta ppm               | -11.9  | -12.5   | 0.50   | -5.8             | -5.7           |                                                  | 0.1                             | -2.3                       |                             | -5.0               | 9.5     | -3.8        | -0.4              | -0.7                                               | -2.6                  | 6.3                   | 20.6                  | 20.1              | -0.1                  | 20.4                  | -29.6                  | 18.5                   | -2.8              |                        |          | 3.4   |

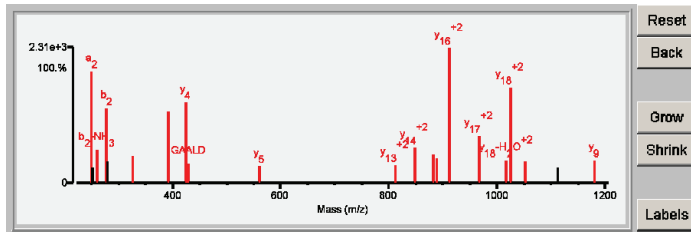

Result Summary

| Rank | Score | SPI (%) | BCS | # Unmatched Ions | Variable sites | Sequence             | MH <sup>+</sup> Calculated (Da) | MH <sup>+</sup> Error (Da) | MH <sup>+</sup> Error (ppm) | Protein MW/pl (Da) | Species | Accession # | Protein Name                                                                  |
|------|-------|---------|-----|------------------|----------------|----------------------|---------------------------------|----------------------------|-----------------------------|--------------------|---------|-------------|-------------------------------------------------------------------------------|
| 1    | 16.54 | 83.3    | 8   | 6/25             | K456k          | (R)LAGDkYQAAVQALR(E) | 1503.8278                       | 114.0517                   | 5.4                         | 53082.9/7.61       | HUMAN   | P34896      | Serine hydroxymethyltransferase, cytosolic OS=Homo sapiens GN=SHMT1 PE=1 SV=1 |

Detailed Results

| Rank                    | Score  | SPI (%) | BCS    | # Unmatched Ions | Variable sites | Sequence             | MH <sup>+</sup> Calculated (Da) | MH <sup>+</sup> Error (Da) | MH <sup>+</sup> Error (ppm) | Protein MW/pl (Da) | Species | Accession # | MS-Digest Index # | Protein Name                                                                  |                      |         |         |         |                       |         |         |                       |                   |         |         |       |
|-------------------------|--------|---------|--------|------------------|----------------|----------------------|---------------------------------|----------------------------|-----------------------------|--------------------|---------|-------------|-------------------|-------------------------------------------------------------------------------|----------------------|---------|---------|---------|-----------------------|---------|---------|-----------------------|-------------------|---------|---------|-------|
| 1                       | 16.54  | 83.3    | 8      | 6/25             | K456k          | (R)LAGDkYQAAVQALR(E) | 1503.8278                       | 114.0517                   | 5.4                         | 53082.9/7.61       | HUMAN   | P34896      | 256085            | Serine hydroxymethyltransferase, cytosolic OS=Homo sapiens GN=SHMT1 PE=1 SV=1 |                      |         |         |         |                       |         |         |                       |                   |         |         |       |
| Fragment-Ion (m/z)      | 70.064 | 72.079  | 84.079 | 86.095           | 101.070        | 136.075              | 157.133                         | 159.084                    | 175.115                     | 185.127            | 200.101 | 311.181     | 353.183           | 358.180                                                                       | 397.179              | 415.183 | 477.205 | 487.301 | 499.222 <sup>+2</sup> | 517.275 | 586.372 | 631.331 <sup>+2</sup> | 657.407           | 728.448 | 856.495 |       |
| Frac. Inten. (% of TIC) | 0.00   | 0.13    | 0.42   | 25.10            | 0.16           | 0.13                 | 5.73                            | 2.39                       | 4.67                        | 3.54               | 2.24    | 3.69        | 2.49              | 4.70                                                                          | 2.15                 | 2.51    | 2.23    | 5.08    |                       | 3.14    | 2.72    | 6.05                  | 2.31              | 8.49    | 5.07    | 4.84  |
| Rel. Inten. (% of BP)   | 0.01   | 0.51    | 1.67   | 100.00           | 0.63           | 0.53                 | 22.82                           | 9.54                       | 18.62                       | 14.12              | 8.94    | 14.71       | 9.93              | 18.74                                                                         | 8.57                 | 9.99    | 8.90    | 20.25   |                       | 12.49   | 10.85   | 24.09                 | 9.22              | 33.82   | 20.19   | 19.27 |
| Score                   | 0.20   | 0.50    | 0.50   | 0.50             |                | 1.00                 | 0.50                            | -0.10                      | 1.50                        | 0.75               | 0.75    | -0.15       | -0.10             | 0.75                                                                          | 0.50                 | 0.75    | -0.09   | 1.50    |                       | -0.12   | -0.11   | 1.50                  | 1.50              | 1.50    | 1.50    | 1.50  |
| Ion-type                | PR     | V       | KQ     | a1               | KQ             | Y                    | a2                              |                            | y1                          | b2                 | QA      |             |                   | Dk                                                                            | GDK-H <sub>2</sub> O | GDK     |         | y4      |                       |         |         | y5                    | y10 <sup>+2</sup> | y6      | y7      | y8    |
| Delta ppm               | -18.9  | -17.7   | -15.2  | -30.5            |                | -2.1                 | -8.5                            |                            | -20.9                       | -14.3              | -17.8   |             |                   | 18.4                                                                          | -12.4                | -27.4   |         | 4.1     |                       |         |         | 8.7                   | -36.6             | 3.7     | 9.4     | -5.8  |

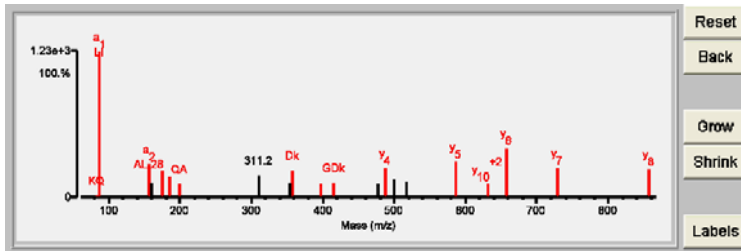

Result Summary

| Rank | Score | SPI (%) | BCS | # Unmatched Ions | Variable sites | Sequence             | MH <sup>+</sup> Calculated (Da) | MH <sup>+</sup> Error (Da) | MH <sup>+</sup> Error (ppm) | Protein MW/pl (Da) | Species | Accession # | Protein Name                                                            |
|------|-------|---------|-----|------------------|----------------|----------------------|---------------------------------|----------------------------|-----------------------------|--------------------|---------|-------------|-------------------------------------------------------------------------|
| 1    | 10.48 | 69.2    | 4   | 11/25            | K237k          | (R)IQTKELPLTLPLGR(S) | 1562.9265                       | 114.0351                   | -4.7                        | 48841.1/10.07      | HUMAN   | O43464      | Serine protease HTRA2, mitochondrial OS=Homo sapiens GN=HTRA2 PE=1 SV=2 |

Detailed Results

| Rank | Score | SPI (%) | BCS | # Unmatched Ions | Variable sites | Sequence             | MH <sup>+</sup> Calculated (Da) | MH <sup>+</sup> Error (Da) | MH <sup>+</sup> Error (ppm) | Protein MW/pl (Da) | Species | Accession # | MS-Digest Index # | Protein Name                                                            |
|------|-------|---------|-----|------------------|----------------|----------------------|---------------------------------|----------------------------|-----------------------------|--------------------|---------|-------------|-------------------|-------------------------------------------------------------------------|
| 1    | 10.48 | 69.2    | 4   | 11/25            | K237k          | (R)IQTKELPLTLPLGR(S) | 1562.9265                       | 114.0351                   | -4.7                        | 48841.1/10.07      | HUMAN   | O43464      | 302643            | Serine protease HTRA2, mitochondrial OS=Homo sapiens GN=HTRA2 PE=1 SV=2 |

  

| Fragment-ion (m/z)     | 70.063 | 84.078 | 84.105 | 86.096 | 87.097 | 115.082 | 129.096 | 199.102 | 225.120 | 232.134 | 324.159 | 340.183         | 377.227 <sup>+2</sup> | 392.217 <sup>+2</sup> | 423.218 | 439.743 <sup>+2</sup> | 442.272 | 448.756 <sup>+2</sup> | 452.200 | 467.241 | 473.233 | 656.399 | 664.358 | 709.443 | 753.447 |
|------------------------|--------|--------|--------|--------|--------|---------|---------|---------|---------|---------|---------|-----------------|-----------------------|-----------------------|---------|-----------------------|---------|-----------------------|---------|---------|---------|---------|---------|---------|---------|
| Frac. Inten.(% of TIC) | 0.01   | 0.25   | 2.51   | 17.91  | 3.45   | 2.08    | 3.16    | 4.48    | 2.28    | 1.64    | 2.19    | 2.78            | 6.18                  | 1.90                  | 2.68    | 3.49                  | 9.09    | 1.86                  | 3.23    | 4.26    | 2.67    | 3.09    | 2.09    | 1.65    | 15.06   |
| Rel. Inten.(% of BP)   | 0.08   | 1.38   | 14.03  | 100.00 | 19.27  | 11.64   | 17.66   | 25.03   | 12.75   | 9.16    | 12.23   | 15.50           | 34.52                 | 10.59                 | 14.95   | 19.51                 | 50.79   | 10.41                 | 18.06   | 23.80   | 14.91   | 17.25   | 11.65   | 9.21    | 84.14   |
| Score                  | 0.20   | 0.50   | -0.14  | 0.50   | -0.19  | -0.12   | -0.18   | 0.75    | 0.25    | 1.50    | -0.12   | 0.75            | 1.50                  | 0.50                  | -0.15   | -0.20                 | 1.50    | 0.50                  | 0.50    | -0.18   | -0.24   | 0.75    | 1.50    | -0.12   | -0.09   |
| Ion-type               | PR     | KQ     |        | a1     |        |         |         | PT      | b2-NH3  | y2      | EPL     | y <sup>+2</sup> | a6 <sup>+2</sup>      |                       |         |                       | y4      | a7 <sup>+2</sup>      |         |         | TKE     | y6      |         |         | y7      |
| Delta ppm              | -33.2  | -31.8  |        | -20.0  |        |         |         | -32.2   | -19.0   | -28.5   | -13.2   | -19.9           | -13.4                 |                       |         |                       | -12.3   | -18.3                 |         |         | -6.6    | -15.1   |         |         | -19.4   |

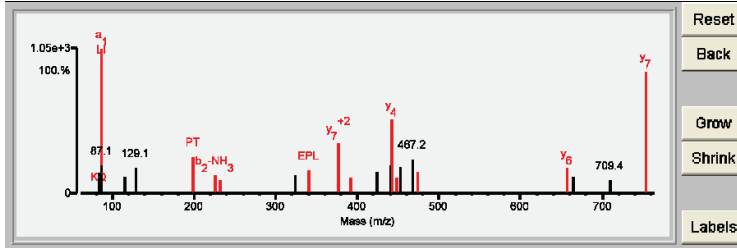

Result Summary

| Rank | Score | SPI (%) | BCS | # Unmatched Ions | Variable sites | Sequence                  | MH <sup>+</sup> Calculated (Da) | MH <sup>+</sup> Error (Da) | MH <sup>+</sup> Error (ppm) | Protein MW/PI (Da) | Species | Accession # | Protein Name                                                                                                         |
|------|-------|---------|-----|------------------|----------------|---------------------------|---------------------------------|----------------------------|-----------------------------|--------------------|---------|-------------|----------------------------------------------------------------------------------------------------------------------|
| 1    | 20.59 | 89.6    | 10  | 4/25             | K306k          | (K)FPASVPTGAQDLISK(LR)(H) | 1913.0855                       | 114.0418                   | -0.6                        | 39280.79.36        | HUMAN   | Q96GD4      | Serine/threonine-protein kinase 12 OS=Homo sapiens GN=AURKB PE=1 SV=2                                                |
| 2    | 5.66  | 55.0    | 3   | 16/25            | None           | (K)KLDVVSAGRELQKVL(R)(L)  | 2027.1608                       | -0.0335                    | -16.5                       | 80760.8/8.88       | HUMAN   | RQ14123     | REVERSE Calcium/calmodulin-dependent 3',5'-cyclic nucleotide phosphodiesterase 1C OS=Homo sapiens GN=PDE1C PE=2 SV=1 |
| 3    | 4.42  | 50.7    | 3   | 15/25            | None           | (K)FYEKMLPYVAVALDVR(D)    | 2027.1034                       | 0.0238                     | 11.7                        | 96820.3/5.45       | HUMAN   | RQ9UBB9     | REVERSE Tufelin-interacting protein 11 OS=Homo sapiens GN=TFP11 PE=1 SV=1                                            |

Detailed Results

| Rank | Score | SPI (%) | BCS | # Unmatched Ions | Variable sites | Sequence                                           | MH <sup>+</sup> Calculated (Da) | MH <sup>+</sup> Error (Da) | MH <sup>+</sup> Error (ppm) | Protein MW/PI (Da) | Species | Accession # | MS-Digest Index # | Protein Name                                                          |
|------|-------|---------|-----|------------------|----------------|----------------------------------------------------|---------------------------------|----------------------------|-----------------------------|--------------------|---------|-------------|-------------------|-----------------------------------------------------------------------|
| 1    | 20.59 | 89.6    | 10  | 4/25             | K306k          | (K)P/P I A S V P T G A Q D L I S / k / L L / R (H) | 1913.0855                       | 114.0418                   | -0.6                        | 39280.79.36        | HUMAN   | Q96GD4      | 62693             | Serine/threonine-protein kinase 12 OS=Homo sapiens GN=AURKB PE=1 SV=2 |

  

| Fragment-ion (m/z)      | 70.065 | 86.098 | 175.118 | 245.132 | 401.287 | 413.217 | 422.273 <sup>+2</sup> | 484.259 | 502.267 | 556.330 | 570.257 | 591.351 <sup>+2</sup> | 601.444 | 627.361 <sup>+3</sup> | 638.712 <sup>+3</sup> | 643.426 | 730.454 | 754.941 <sup>+2</sup> | 763.437 <sup>+2</sup> | 827.465 | 843.533 | 891.993 <sup>+2</sup> | 956.626 | 1071.527 | 1071.653 |
|-------------------------|--------|--------|---------|---------|---------|---------|-----------------------|---------|---------|---------|---------|-----------------------|---------|-----------------------|-----------------------|---------|---------|-----------------------|-----------------------|---------|---------|-----------------------|---------|----------|----------|
| Frac. Inten. (% of TIC) | 0.00   | 0.52   | 3.73    | 2.13    | 2.16    | 3.03    | 5.07                  | 2.64    | 2.60    | 2.05    | 5.03    | 3.91                  | 3.09    | 3.68                  | 2.11                  | 2.18    | 15.43   | 2.01                  | 17.91                 | 2.17    | 8.22    | 2.42                  | 2.01    | 2.27     | 3.64     |
| Rel. Inten. (% of BP)   | 0.02   | 2.88   | 20.81   | 11.89   | 12.07   | 16.90   | 28.31                 | 14.75   | 14.54   | 11.43   | 28.09   | 21.82                 | 17.27   | 20.56                 | 11.77                 | 12.16   | 86.18   | 11.24                 | 100.00                | 12.11   | 45.89   | 13.53                 | 11.21   | 12.70    | 20.32    |
| Score                   | 0.20   | 0.22   | 1.50    | 0.50    | 1.50    | -0.17   | 1.50                  | 0.25    | 0.50    | 0.75    | 0.75    | 0.50                  | -0.17   | 1.50                  | -0.12                 | 1.50    | 1.50    | 0.50                  | 1.50                  | -0.12   | 1.50    | 13.53                 | 1.50    | 0.50     | 1.50     |
| Ion-type                | PR     | L1     | y1      | b2      | y3      |         | y6 <sup>+2</sup>      | b5+H2O  | b5      | SKLL    | PTGAQD  | y9-H2O <sup>+2</sup>  |         | y17 <sup>+3</sup>     |                       | y4      | y5      | y13-NH3 <sup>+2</sup> | y13 <sup>+2</sup>     |         | y6      | y16 <sup>+2</sup>     | y7      | b11      | y6       |
| Delta ppm               | 2.5    | 16.0   | -7.7    | 9.2     | -0.2    |         | -3.2                  | 4.9     | 0.4     | -29.5   | 7.3     | -4.9                  |         | 5.0                   |                       | 1.3     | -4.5    | 21.2                  | -2.5                  |         | -9.4    | -16.1                 | 0.5     | 14.0     | 1.1      |

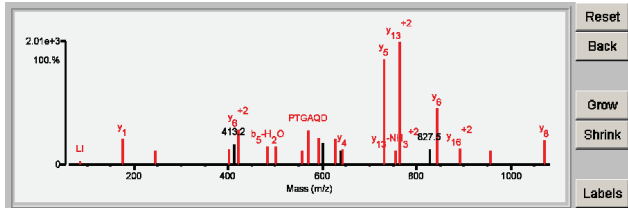

Result Summary

| Rank | Score | SPI (%) | BCS | # Unmatched Ions | Variable sites | Sequence           | MH <sup>+</sup> Calculated (Da) | MH <sup>+</sup> Error (Da) | MH <sup>+</sup> Error (ppm) | Protein MW/pl (Da) | Species | Accession # | Protein Name                                                            |
|------|-------|---------|-----|------------------|----------------|--------------------|---------------------------------|----------------------------|-----------------------------|--------------------|---------|-------------|-------------------------------------------------------------------------|
| 1    | 11.47 | 65.3    | 3   | 11/25            | K533k          | (K)LLFLRYHKEK(E)   | 1346.7943                       | 114.0240                   | -13.0                       | 410263.6/6.05      | HUMAN   | Q96Q15      | Serine/threonine-protein kinase SMG1 OS=Homo sapiens GN=SMG1 PE=1 SV=2  |
| 2    | 10.67 | 64.4    | 3   | 12/25            | K535k          | (K)LLFLRYHKEK(E)   | 1346.7943                       | 114.0240                   | -13.0                       | 410263.6/6.05      | HUMAN   | Q96Q15      | Serine/threonine-protein kinase SMG1 OS=Homo sapiens GN=SMG1 PE=1 SV=2  |
| 3    | 8.45  | 55.9    | 3   | 14/25            | K1886k         | (R)LGGILFSDNAVK(K) | 1346.7678                       | 114.0505                   | 5.2                         | 229892.3/7.65      | HUMAN   | RP53804     | REVERSE Tetrapeptide repeat protein 3 OS=Homo sapiens GN=TTG3 PE=2 SV=1 |
| 4    | 7.88  | 59.9    | 2   | 14/25            | M1462m K1467k  | (K)IImEEVVKLEK(D)  | 1330.7651                       | 130.0533                   | 10.6                        | 231619.2/6.56      | HUMAN   | Q92817      | Envoplakin OS=Homo sapiens GN=EVPL PE=1 SV=2                            |
| 5    | 7.63  | 59.9    | 2   | 14/25            | M1462m K1470k  | (K)IImEEVVKLEK(D)  | 1330.7651                       | 130.0533                   | 10.6                        | 231619.2/6.56      | HUMAN   | Q92817      | Envoplakin OS=Homo sapiens GN=EVPL PE=1 SV=2                            |

Detailed Results

| Rank                                                                                                                                                                                                                                                                                                                                                                                                                                                                                                                                                                                                                                                                                                                                                                                                                                                                                                                                                                                                                                                                                                                                                                                                                                                                                                                                                                                                                                                                                                                                                                                                                                                                                                                                                                                                                                                                                                                                                                                                                                                                                                                                                                                                                                                                                                                                                                                                                                                                                                                                                                                                                                                                                                                                                                                                                                                                                                                                                                                                                                                                                                                                                                                                                                                                                                                                                                                                                                                                                                               | Score  | SPI (%) | BCS     | # Unmatched Ions | Variable sites | Sequence                    | MH <sup>+</sup> Calculated (Da) | MH <sup>+</sup> Error (Da) | MH <sup>+</sup> Error (ppm) | Protein MW/pl (Da) | Species | Accession #           | MS-Digest Index # | Protein Name                                                           |                       |         |                       |                       |                       |         |         |         |          |          |          |         |                       |         |                       |                       |         |                       |                       |                       |         |         |         |          |          |          |                         |      |      |      |      |      |      |      |      |      |      |      |      |      |      |      |      |      |       |      |      |      |      |      |      |      |                             |      |       |      |       |      |       |       |       |       |      |       |       |      |       |      |       |      |        |       |      |       |      |       |       |       |          |      |      |      |      |       |      |       |       |      |       |       |       |      |      |       |       |      |      |       |      |      |       |       |      |      |           |      |      |      |     |  |      |  |  |  |  |  |  |  |       |       |  |  |  |  |  |  |  |  |  |  |  |          |    |    |   |    |  |    |  |    |  |  |  |    |  |                  |  |  |  |                      |  |  |  |  |  |  |  |  |           |      |      |      |     |  |      |  |      |  |  |  |  |  |       |       |  |  |       |  |  |  |  |  |  |  |  |          |    |  |  |  |  |  |  |     |  |  |  |  |  |  |  |  |  |  |  |  |  |  |  |  |  |  |           |     |  |  |  |  |  |  |      |  |  |  |  |  |  |  |  |  |  |  |  |  |  |  |  |  |  |
|--------------------------------------------------------------------------------------------------------------------------------------------------------------------------------------------------------------------------------------------------------------------------------------------------------------------------------------------------------------------------------------------------------------------------------------------------------------------------------------------------------------------------------------------------------------------------------------------------------------------------------------------------------------------------------------------------------------------------------------------------------------------------------------------------------------------------------------------------------------------------------------------------------------------------------------------------------------------------------------------------------------------------------------------------------------------------------------------------------------------------------------------------------------------------------------------------------------------------------------------------------------------------------------------------------------------------------------------------------------------------------------------------------------------------------------------------------------------------------------------------------------------------------------------------------------------------------------------------------------------------------------------------------------------------------------------------------------------------------------------------------------------------------------------------------------------------------------------------------------------------------------------------------------------------------------------------------------------------------------------------------------------------------------------------------------------------------------------------------------------------------------------------------------------------------------------------------------------------------------------------------------------------------------------------------------------------------------------------------------------------------------------------------------------------------------------------------------------------------------------------------------------------------------------------------------------------------------------------------------------------------------------------------------------------------------------------------------------------------------------------------------------------------------------------------------------------------------------------------------------------------------------------------------------------------------------------------------------------------------------------------------------------------------------------------------------------------------------------------------------------------------------------------------------------------------------------------------------------------------------------------------------------------------------------------------------------------------------------------------------------------------------------------------------------------------------------------------------------------------------------------------------|--------|---------|---------|------------------|----------------|-----------------------------|---------------------------------|----------------------------|-----------------------------|--------------------|---------|-----------------------|-------------------|------------------------------------------------------------------------|-----------------------|---------|-----------------------|-----------------------|-----------------------|---------|---------|---------|----------|----------|----------|---------|-----------------------|---------|-----------------------|-----------------------|---------|-----------------------|-----------------------|-----------------------|---------|---------|---------|----------|----------|----------|-------------------------|------|------|------|------|------|------|------|------|------|------|------|------|------|------|------|------|------|-------|------|------|------|------|------|------|------|-----------------------------|------|-------|------|-------|------|-------|-------|-------|-------|------|-------|-------|------|-------|------|-------|------|--------|-------|------|-------|------|-------|-------|-------|----------|------|------|------|------|-------|------|-------|-------|------|-------|-------|-------|------|------|-------|-------|------|------|-------|------|------|-------|-------|------|------|-----------|------|------|------|-----|--|------|--|--|--|--|--|--|--|-------|-------|--|--|--|--|--|--|--|--|--|--|--|----------|----|----|---|----|--|----|--|----|--|--|--|----|--|------------------|--|--|--|----------------------|--|--|--|--|--|--|--|--|-----------|------|------|------|-----|--|------|--|------|--|--|--|--|--|-------|-------|--|--|-------|--|--|--|--|--|--|--|--|----------|----|--|--|--|--|--|--|-----|--|--|--|--|--|--|--|--|--|--|--|--|--|--|--|--|--|--|-----------|-----|--|--|--|--|--|--|------|--|--|--|--|--|--|--|--|--|--|--|--|--|--|--|--|--|--|
| 1                                                                                                                                                                                                                                                                                                                                                                                                                                                                                                                                                                                                                                                                                                                                                                                                                                                                                                                                                                                                                                                                                                                                                                                                                                                                                                                                                                                                                                                                                                                                                                                                                                                                                                                                                                                                                                                                                                                                                                                                                                                                                                                                                                                                                                                                                                                                                                                                                                                                                                                                                                                                                                                                                                                                                                                                                                                                                                                                                                                                                                                                                                                                                                                                                                                                                                                                                                                                                                                                                                                  | 11.47  | 65.3    | 3       | 11/25            | K533k          | (K) L L F L R Y H K E K (E) | 1346.7943                       | 114.0240                   | -13.0                       | 410263.6/6.05      | HUMAN   | Q96Q15                | 722689            | Serine/threonine-protein kinase SMG1 OS=Homo sapiens GN=SMG1 PE=1 SV=2 |                       |         |                       |                       |                       |         |         |         |          |          |          |         |                       |         |                       |                       |         |                       |                       |                       |         |         |         |          |          |          |                         |      |      |      |      |      |      |      |      |      |      |      |      |      |      |      |      |      |       |      |      |      |      |      |      |      |                             |      |       |      |       |      |       |       |       |       |      |       |       |      |       |      |       |      |        |       |      |       |      |       |       |       |          |      |      |      |      |       |      |       |       |      |       |       |       |      |      |       |       |      |      |       |      |      |       |       |      |      |           |      |      |      |     |  |      |  |  |  |  |  |  |  |       |       |  |  |  |  |  |  |  |  |  |  |  |          |    |    |   |    |  |    |  |    |  |  |  |    |  |                  |  |  |  |                      |  |  |  |  |  |  |  |  |           |      |      |      |     |  |      |  |      |  |  |  |  |  |       |       |  |  |       |  |  |  |  |  |  |  |  |          |    |  |  |  |  |  |  |     |  |  |  |  |  |  |  |  |  |  |  |  |  |  |  |  |  |  |           |     |  |  |  |  |  |  |      |  |  |  |  |  |  |  |  |  |  |  |  |  |  |  |  |  |  |
| <table border="1"> <thead> <tr> <th>Fragment-ion (m/z)</th> <th>84.082</th> <th>86.097</th> <th>120.082</th> <th>199.183</th> <th>200.186</th> <th>227.179</th> <th>232.144</th> <th>347.173</th> <th>374.249</th> <th>445.290</th> <th>476.217</th> <th>508.770<sup>+2</sup></th> <th>518.278</th> <th>544.289<sup>+2</sup></th> <th>560.801<sup>+2</sup></th> <th>589.307</th> <th>608.815<sup>+2</sup></th> <th>617.824<sup>+2</sup></th> <th>673.889<sup>+2</sup></th> <th>699.352</th> <th>717.363</th> <th>959.507</th> <th>1016.530</th> <th>1087.565</th> <th>1234.633</th> </tr> </thead> <tbody> <tr> <td>Frac. Inten. (% of TIC)</td> <td>0.06</td> <td>8.03</td> <td>0.08</td> <td>8.06</td> <td>1.26</td> <td>6.78</td> <td>6.17</td> <td>3.54</td> <td>2.89</td> <td>1.19</td> <td>2.96</td> <td>2.34</td> <td>0.92</td> <td>3.49</td> <td>1.12</td> <td>3.16</td> <td>1.07</td> <td>19.47</td> <td>4.48</td> <td>0.90</td> <td>3.45</td> <td>1.59</td> <td>6.89</td> <td>4.76</td> <td>5.36</td> </tr> <tr> <td>Rel. Inten. (% of BP) Score</td> <td>0.28</td> <td>41.26</td> <td>0.42</td> <td>41.43</td> <td>6.50</td> <td>34.81</td> <td>31.68</td> <td>18.16</td> <td>14.86</td> <td>6.10</td> <td>15.21</td> <td>12.03</td> <td>4.72</td> <td>17.91</td> <td>5.74</td> <td>16.24</td> <td>5.48</td> <td>100.00</td> <td>23.01</td> <td>4.63</td> <td>17.73</td> <td>8.15</td> <td>35.37</td> <td>24.45</td> <td>27.54</td> </tr> <tr> <td>Ion-type</td> <td>0.50</td> <td>0.50</td> <td>1.00</td> <td>0.50</td> <td>-0.06</td> <td>0.50</td> <td>-0.32</td> <td>-0.18</td> <td>0.75</td> <td>-0.06</td> <td>-0.15</td> <td>-0.12</td> <td>1.50</td> <td>1.50</td> <td>-0.06</td> <td>-0.16</td> <td>0.50</td> <td>1.50</td> <td>-0.23</td> <td>0.75</td> <td>0.75</td> <td>-0.08</td> <td>-0.35</td> <td>1.50</td> <td>1.50</td> </tr> <tr> <td>Delta ppm</td> <td>19.3</td> <td>-3.8</td> <td>10.2</td> <td>9.1</td> <td></td> <td>11.4</td> <td></td> <td></td> <td></td> <td></td> <td></td> <td></td> <td></td> <td>-29.5</td> <td>-28.1</td> <td></td> </tr> <tr> <td>Ion-type</td> <td>KQ</td> <td>a1</td> <td>F</td> <td>a2</td> <td></td> <td>b2</td> <td></td> <td>b3</td> <td></td> <td></td> <td></td> <td>y3</td> <td></td> <td>y7<sup>+2</sup></td> <td></td> <td></td> <td></td> <td>y8-H2O<sup>+2</sup></td> <td></td> <td></td> <td></td> <td></td> <td></td> <td></td> <td></td> <td></td> </tr> <tr> <td>Delta ppm</td> <td>19.3</td> <td>-3.8</td> <td>10.2</td> <td>9.1</td> <td></td> <td>11.4</td> <td></td> <td>10.6</td> <td></td> <td></td> <td></td> <td></td> <td></td> <td>-29.5</td> <td>-28.1</td> <td></td> <td></td> <td>-29.0</td> <td></td> <td></td> <td></td> <td></td> <td></td> <td></td> <td></td> <td></td> </tr> <tr> <td>Ion-type</td> <td>L1</td> <td></td> <td></td> <td></td> <td></td> <td></td> <td></td> <td>LFL</td> <td></td> </tr> <tr> <td>Delta ppm</td> <td>9.0</td> <td></td> <td></td> <td></td> <td></td> <td></td> <td></td> <td>10.6</td> <td></td> </tr> </tbody> </table> |        |         |         |                  |                |                             |                                 |                            |                             |                    |         |                       |                   |                                                                        | Fragment-ion (m/z)    | 84.082  | 86.097                | 120.082               | 199.183               | 200.186 | 227.179 | 232.144 | 347.173  | 374.249  | 445.290  | 476.217 | 508.770 <sup>+2</sup> | 518.278 | 544.289 <sup>+2</sup> | 560.801 <sup>+2</sup> | 589.307 | 608.815 <sup>+2</sup> | 617.824 <sup>+2</sup> | 673.889 <sup>+2</sup> | 699.352 | 717.363 | 959.507 | 1016.530 | 1087.565 | 1234.633 | Frac. Inten. (% of TIC) | 0.06 | 8.03 | 0.08 | 8.06 | 1.26 | 6.78 | 6.17 | 3.54 | 2.89 | 1.19 | 2.96 | 2.34 | 0.92 | 3.49 | 1.12 | 3.16 | 1.07 | 19.47 | 4.48 | 0.90 | 3.45 | 1.59 | 6.89 | 4.76 | 5.36 | Rel. Inten. (% of BP) Score | 0.28 | 41.26 | 0.42 | 41.43 | 6.50 | 34.81 | 31.68 | 18.16 | 14.86 | 6.10 | 15.21 | 12.03 | 4.72 | 17.91 | 5.74 | 16.24 | 5.48 | 100.00 | 23.01 | 4.63 | 17.73 | 8.15 | 35.37 | 24.45 | 27.54 | Ion-type | 0.50 | 0.50 | 1.00 | 0.50 | -0.06 | 0.50 | -0.32 | -0.18 | 0.75 | -0.06 | -0.15 | -0.12 | 1.50 | 1.50 | -0.06 | -0.16 | 0.50 | 1.50 | -0.23 | 0.75 | 0.75 | -0.08 | -0.35 | 1.50 | 1.50 | Delta ppm | 19.3 | -3.8 | 10.2 | 9.1 |  | 11.4 |  |  |  |  |  |  |  | -29.5 | -28.1 |  |  |  |  |  |  |  |  |  |  |  | Ion-type | KQ | a1 | F | a2 |  | b2 |  | b3 |  |  |  | y3 |  | y7 <sup>+2</sup> |  |  |  | y8-H2O <sup>+2</sup> |  |  |  |  |  |  |  |  | Delta ppm | 19.3 | -3.8 | 10.2 | 9.1 |  | 11.4 |  | 10.6 |  |  |  |  |  | -29.5 | -28.1 |  |  | -29.0 |  |  |  |  |  |  |  |  | Ion-type | L1 |  |  |  |  |  |  | LFL |  |  |  |  |  |  |  |  |  |  |  |  |  |  |  |  |  |  | Delta ppm | 9.0 |  |  |  |  |  |  | 10.6 |  |  |  |  |  |  |  |  |  |  |  |  |  |  |  |  |  |  |
| Fragment-ion (m/z)                                                                                                                                                                                                                                                                                                                                                                                                                                                                                                                                                                                                                                                                                                                                                                                                                                                                                                                                                                                                                                                                                                                                                                                                                                                                                                                                                                                                                                                                                                                                                                                                                                                                                                                                                                                                                                                                                                                                                                                                                                                                                                                                                                                                                                                                                                                                                                                                                                                                                                                                                                                                                                                                                                                                                                                                                                                                                                                                                                                                                                                                                                                                                                                                                                                                                                                                                                                                                                                                                                 | 84.082 | 86.097  | 120.082 | 199.183          | 200.186        | 227.179                     | 232.144                         | 347.173                    | 374.249                     | 445.290            | 476.217 | 508.770 <sup>+2</sup> | 518.278           | 544.289 <sup>+2</sup>                                                  | 560.801 <sup>+2</sup> | 589.307 | 608.815 <sup>+2</sup> | 617.824 <sup>+2</sup> | 673.889 <sup>+2</sup> | 699.352 | 717.363 | 959.507 | 1016.530 | 1087.565 | 1234.633 |         |                       |         |                       |                       |         |                       |                       |                       |         |         |         |          |          |          |                         |      |      |      |      |      |      |      |      |      |      |      |      |      |      |      |      |      |       |      |      |      |      |      |      |      |                             |      |       |      |       |      |       |       |       |       |      |       |       |      |       |      |       |      |        |       |      |       |      |       |       |       |          |      |      |      |      |       |      |       |       |      |       |       |       |      |      |       |       |      |      |       |      |      |       |       |      |      |           |      |      |      |     |  |      |  |  |  |  |  |  |  |       |       |  |  |  |  |  |  |  |  |  |  |  |          |    |    |   |    |  |    |  |    |  |  |  |    |  |                  |  |  |  |                      |  |  |  |  |  |  |  |  |           |      |      |      |     |  |      |  |      |  |  |  |  |  |       |       |  |  |       |  |  |  |  |  |  |  |  |          |    |  |  |  |  |  |  |     |  |  |  |  |  |  |  |  |  |  |  |  |  |  |  |  |  |  |           |     |  |  |  |  |  |  |      |  |  |  |  |  |  |  |  |  |  |  |  |  |  |  |  |  |  |
| Frac. Inten. (% of TIC)                                                                                                                                                                                                                                                                                                                                                                                                                                                                                                                                                                                                                                                                                                                                                                                                                                                                                                                                                                                                                                                                                                                                                                                                                                                                                                                                                                                                                                                                                                                                                                                                                                                                                                                                                                                                                                                                                                                                                                                                                                                                                                                                                                                                                                                                                                                                                                                                                                                                                                                                                                                                                                                                                                                                                                                                                                                                                                                                                                                                                                                                                                                                                                                                                                                                                                                                                                                                                                                                                            | 0.06   | 8.03    | 0.08    | 8.06             | 1.26           | 6.78                        | 6.17                            | 3.54                       | 2.89                        | 1.19               | 2.96    | 2.34                  | 0.92              | 3.49                                                                   | 1.12                  | 3.16    | 1.07                  | 19.47                 | 4.48                  | 0.90    | 3.45    | 1.59    | 6.89     | 4.76     | 5.36     |         |                       |         |                       |                       |         |                       |                       |                       |         |         |         |          |          |          |                         |      |      |      |      |      |      |      |      |      |      |      |      |      |      |      |      |      |       |      |      |      |      |      |      |      |                             |      |       |      |       |      |       |       |       |       |      |       |       |      |       |      |       |      |        |       |      |       |      |       |       |       |          |      |      |      |      |       |      |       |       |      |       |       |       |      |      |       |       |      |      |       |      |      |       |       |      |      |           |      |      |      |     |  |      |  |  |  |  |  |  |  |       |       |  |  |  |  |  |  |  |  |  |  |  |          |    |    |   |    |  |    |  |    |  |  |  |    |  |                  |  |  |  |                      |  |  |  |  |  |  |  |  |           |      |      |      |     |  |      |  |      |  |  |  |  |  |       |       |  |  |       |  |  |  |  |  |  |  |  |          |    |  |  |  |  |  |  |     |  |  |  |  |  |  |  |  |  |  |  |  |  |  |  |  |  |  |           |     |  |  |  |  |  |  |      |  |  |  |  |  |  |  |  |  |  |  |  |  |  |  |  |  |  |
| Rel. Inten. (% of BP) Score                                                                                                                                                                                                                                                                                                                                                                                                                                                                                                                                                                                                                                                                                                                                                                                                                                                                                                                                                                                                                                                                                                                                                                                                                                                                                                                                                                                                                                                                                                                                                                                                                                                                                                                                                                                                                                                                                                                                                                                                                                                                                                                                                                                                                                                                                                                                                                                                                                                                                                                                                                                                                                                                                                                                                                                                                                                                                                                                                                                                                                                                                                                                                                                                                                                                                                                                                                                                                                                                                        | 0.28   | 41.26   | 0.42    | 41.43            | 6.50           | 34.81                       | 31.68                           | 18.16                      | 14.86                       | 6.10               | 15.21   | 12.03                 | 4.72              | 17.91                                                                  | 5.74                  | 16.24   | 5.48                  | 100.00                | 23.01                 | 4.63    | 17.73   | 8.15    | 35.37    | 24.45    | 27.54    |         |                       |         |                       |                       |         |                       |                       |                       |         |         |         |          |          |          |                         |      |      |      |      |      |      |      |      |      |      |      |      |      |      |      |      |      |       |      |      |      |      |      |      |      |                             |      |       |      |       |      |       |       |       |       |      |       |       |      |       |      |       |      |        |       |      |       |      |       |       |       |          |      |      |      |      |       |      |       |       |      |       |       |       |      |      |       |       |      |      |       |      |      |       |       |      |      |           |      |      |      |     |  |      |  |  |  |  |  |  |  |       |       |  |  |  |  |  |  |  |  |  |  |  |          |    |    |   |    |  |    |  |    |  |  |  |    |  |                  |  |  |  |                      |  |  |  |  |  |  |  |  |           |      |      |      |     |  |      |  |      |  |  |  |  |  |       |       |  |  |       |  |  |  |  |  |  |  |  |          |    |  |  |  |  |  |  |     |  |  |  |  |  |  |  |  |  |  |  |  |  |  |  |  |  |  |           |     |  |  |  |  |  |  |      |  |  |  |  |  |  |  |  |  |  |  |  |  |  |  |  |  |  |
| Ion-type                                                                                                                                                                                                                                                                                                                                                                                                                                                                                                                                                                                                                                                                                                                                                                                                                                                                                                                                                                                                                                                                                                                                                                                                                                                                                                                                                                                                                                                                                                                                                                                                                                                                                                                                                                                                                                                                                                                                                                                                                                                                                                                                                                                                                                                                                                                                                                                                                                                                                                                                                                                                                                                                                                                                                                                                                                                                                                                                                                                                                                                                                                                                                                                                                                                                                                                                                                                                                                                                                                           | 0.50   | 0.50    | 1.00    | 0.50             | -0.06          | 0.50                        | -0.32                           | -0.18                      | 0.75                        | -0.06              | -0.15   | -0.12                 | 1.50              | 1.50                                                                   | -0.06                 | -0.16   | 0.50                  | 1.50                  | -0.23                 | 0.75    | 0.75    | -0.08   | -0.35    | 1.50     | 1.50     |         |                       |         |                       |                       |         |                       |                       |                       |         |         |         |          |          |          |                         |      |      |      |      |      |      |      |      |      |      |      |      |      |      |      |      |      |       |      |      |      |      |      |      |      |                             |      |       |      |       |      |       |       |       |       |      |       |       |      |       |      |       |      |        |       |      |       |      |       |       |       |          |      |      |      |      |       |      |       |       |      |       |       |       |      |      |       |       |      |      |       |      |      |       |       |      |      |           |      |      |      |     |  |      |  |  |  |  |  |  |  |       |       |  |  |  |  |  |  |  |  |  |  |  |          |    |    |   |    |  |    |  |    |  |  |  |    |  |                  |  |  |  |                      |  |  |  |  |  |  |  |  |           |      |      |      |     |  |      |  |      |  |  |  |  |  |       |       |  |  |       |  |  |  |  |  |  |  |  |          |    |  |  |  |  |  |  |     |  |  |  |  |  |  |  |  |  |  |  |  |  |  |  |  |  |  |           |     |  |  |  |  |  |  |      |  |  |  |  |  |  |  |  |  |  |  |  |  |  |  |  |  |  |
| Delta ppm                                                                                                                                                                                                                                                                                                                                                                                                                                                                                                                                                                                                                                                                                                                                                                                                                                                                                                                                                                                                                                                                                                                                                                                                                                                                                                                                                                                                                                                                                                                                                                                                                                                                                                                                                                                                                                                                                                                                                                                                                                                                                                                                                                                                                                                                                                                                                                                                                                                                                                                                                                                                                                                                                                                                                                                                                                                                                                                                                                                                                                                                                                                                                                                                                                                                                                                                                                                                                                                                                                          | 19.3   | -3.8    | 10.2    | 9.1              |                | 11.4                        |                                 |                            |                             |                    |         |                       |                   | -29.5                                                                  | -28.1                 |         |                       |                       |                       |         |         |         |          |          |          |         |                       |         |                       |                       |         |                       |                       |                       |         |         |         |          |          |          |                         |      |      |      |      |      |      |      |      |      |      |      |      |      |      |      |      |      |       |      |      |      |      |      |      |      |                             |      |       |      |       |      |       |       |       |       |      |       |       |      |       |      |       |      |        |       |      |       |      |       |       |       |          |      |      |      |      |       |      |       |       |      |       |       |       |      |      |       |       |      |      |       |      |      |       |       |      |      |           |      |      |      |     |  |      |  |  |  |  |  |  |  |       |       |  |  |  |  |  |  |  |  |  |  |  |          |    |    |   |    |  |    |  |    |  |  |  |    |  |                  |  |  |  |                      |  |  |  |  |  |  |  |  |           |      |      |      |     |  |      |  |      |  |  |  |  |  |       |       |  |  |       |  |  |  |  |  |  |  |  |          |    |  |  |  |  |  |  |     |  |  |  |  |  |  |  |  |  |  |  |  |  |  |  |  |  |  |           |     |  |  |  |  |  |  |      |  |  |  |  |  |  |  |  |  |  |  |  |  |  |  |  |  |  |
| Ion-type                                                                                                                                                                                                                                                                                                                                                                                                                                                                                                                                                                                                                                                                                                                                                                                                                                                                                                                                                                                                                                                                                                                                                                                                                                                                                                                                                                                                                                                                                                                                                                                                                                                                                                                                                                                                                                                                                                                                                                                                                                                                                                                                                                                                                                                                                                                                                                                                                                                                                                                                                                                                                                                                                                                                                                                                                                                                                                                                                                                                                                                                                                                                                                                                                                                                                                                                                                                                                                                                                                           | KQ     | a1      | F       | a2               |                | b2                          |                                 | b3                         |                             |                    |         | y3                    |                   | y7 <sup>+2</sup>                                                       |                       |         |                       | y8-H2O <sup>+2</sup>  |                       |         |         |         |          |          |          |         |                       |         |                       |                       |         |                       |                       |                       |         |         |         |          |          |          |                         |      |      |      |      |      |      |      |      |      |      |      |      |      |      |      |      |      |       |      |      |      |      |      |      |      |                             |      |       |      |       |      |       |       |       |       |      |       |       |      |       |      |       |      |        |       |      |       |      |       |       |       |          |      |      |      |      |       |      |       |       |      |       |       |       |      |      |       |       |      |      |       |      |      |       |       |      |      |           |      |      |      |     |  |      |  |  |  |  |  |  |  |       |       |  |  |  |  |  |  |  |  |  |  |  |          |    |    |   |    |  |    |  |    |  |  |  |    |  |                  |  |  |  |                      |  |  |  |  |  |  |  |  |           |      |      |      |     |  |      |  |      |  |  |  |  |  |       |       |  |  |       |  |  |  |  |  |  |  |  |          |    |  |  |  |  |  |  |     |  |  |  |  |  |  |  |  |  |  |  |  |  |  |  |  |  |  |           |     |  |  |  |  |  |  |      |  |  |  |  |  |  |  |  |  |  |  |  |  |  |  |  |  |  |
| Delta ppm                                                                                                                                                                                                                                                                                                                                                                                                                                                                                                                                                                                                                                                                                                                                                                                                                                                                                                                                                                                                                                                                                                                                                                                                                                                                                                                                                                                                                                                                                                                                                                                                                                                                                                                                                                                                                                                                                                                                                                                                                                                                                                                                                                                                                                                                                                                                                                                                                                                                                                                                                                                                                                                                                                                                                                                                                                                                                                                                                                                                                                                                                                                                                                                                                                                                                                                                                                                                                                                                                                          | 19.3   | -3.8    | 10.2    | 9.1              |                | 11.4                        |                                 | 10.6                       |                             |                    |         |                       |                   | -29.5                                                                  | -28.1                 |         |                       | -29.0                 |                       |         |         |         |          |          |          |         |                       |         |                       |                       |         |                       |                       |                       |         |         |         |          |          |          |                         |      |      |      |      |      |      |      |      |      |      |      |      |      |      |      |      |      |       |      |      |      |      |      |      |      |                             |      |       |      |       |      |       |       |       |       |      |       |       |      |       |      |       |      |        |       |      |       |      |       |       |       |          |      |      |      |      |       |      |       |       |      |       |       |       |      |      |       |       |      |      |       |      |      |       |       |      |      |           |      |      |      |     |  |      |  |  |  |  |  |  |  |       |       |  |  |  |  |  |  |  |  |  |  |  |          |    |    |   |    |  |    |  |    |  |  |  |    |  |                  |  |  |  |                      |  |  |  |  |  |  |  |  |           |      |      |      |     |  |      |  |      |  |  |  |  |  |       |       |  |  |       |  |  |  |  |  |  |  |  |          |    |  |  |  |  |  |  |     |  |  |  |  |  |  |  |  |  |  |  |  |  |  |  |  |  |  |           |     |  |  |  |  |  |  |      |  |  |  |  |  |  |  |  |  |  |  |  |  |  |  |  |  |  |
| Ion-type                                                                                                                                                                                                                                                                                                                                                                                                                                                                                                                                                                                                                                                                                                                                                                                                                                                                                                                                                                                                                                                                                                                                                                                                                                                                                                                                                                                                                                                                                                                                                                                                                                                                                                                                                                                                                                                                                                                                                                                                                                                                                                                                                                                                                                                                                                                                                                                                                                                                                                                                                                                                                                                                                                                                                                                                                                                                                                                                                                                                                                                                                                                                                                                                                                                                                                                                                                                                                                                                                                           | L1     |         |         |                  |                |                             |                                 | LFL                        |                             |                    |         |                       |                   |                                                                        |                       |         |                       |                       |                       |         |         |         |          |          |          |         |                       |         |                       |                       |         |                       |                       |                       |         |         |         |          |          |          |                         |      |      |      |      |      |      |      |      |      |      |      |      |      |      |      |      |      |       |      |      |      |      |      |      |      |                             |      |       |      |       |      |       |       |       |       |      |       |       |      |       |      |       |      |        |       |      |       |      |       |       |       |          |      |      |      |      |       |      |       |       |      |       |       |       |      |      |       |       |      |      |       |      |      |       |       |      |      |           |      |      |      |     |  |      |  |  |  |  |  |  |  |       |       |  |  |  |  |  |  |  |  |  |  |  |          |    |    |   |    |  |    |  |    |  |  |  |    |  |                  |  |  |  |                      |  |  |  |  |  |  |  |  |           |      |      |      |     |  |      |  |      |  |  |  |  |  |       |       |  |  |       |  |  |  |  |  |  |  |  |          |    |  |  |  |  |  |  |     |  |  |  |  |  |  |  |  |  |  |  |  |  |  |  |  |  |  |           |     |  |  |  |  |  |  |      |  |  |  |  |  |  |  |  |  |  |  |  |  |  |  |  |  |  |
| Delta ppm                                                                                                                                                                                                                                                                                                                                                                                                                                                                                                                                                                                                                                                                                                                                                                                                                                                                                                                                                                                                                                                                                                                                                                                                                                                                                                                                                                                                                                                                                                                                                                                                                                                                                                                                                                                                                                                                                                                                                                                                                                                                                                                                                                                                                                                                                                                                                                                                                                                                                                                                                                                                                                                                                                                                                                                                                                                                                                                                                                                                                                                                                                                                                                                                                                                                                                                                                                                                                                                                                                          | 9.0    |         |         |                  |                |                             |                                 | 10.6                       |                             |                    |         |                       |                   |                                                                        |                       |         |                       |                       |                       |         |         |         |          |          |          |         |                       |         |                       |                       |         |                       |                       |                       |         |         |         |          |          |          |                         |      |      |      |      |      |      |      |      |      |      |      |      |      |      |      |      |      |       |      |      |      |      |      |      |      |                             |      |       |      |       |      |       |       |       |       |      |       |       |      |       |      |       |      |        |       |      |       |      |       |       |       |          |      |      |      |      |       |      |       |       |      |       |       |       |      |      |       |       |      |      |       |      |      |       |       |      |      |           |      |      |      |     |  |      |  |  |  |  |  |  |  |       |       |  |  |  |  |  |  |  |  |  |  |  |          |    |    |   |    |  |    |  |    |  |  |  |    |  |                  |  |  |  |                      |  |  |  |  |  |  |  |  |           |      |      |      |     |  |      |  |      |  |  |  |  |  |       |       |  |  |       |  |  |  |  |  |  |  |  |          |    |  |  |  |  |  |  |     |  |  |  |  |  |  |  |  |  |  |  |  |  |  |  |  |  |  |           |     |  |  |  |  |  |  |      |  |  |  |  |  |  |  |  |  |  |  |  |  |  |  |  |  |  |

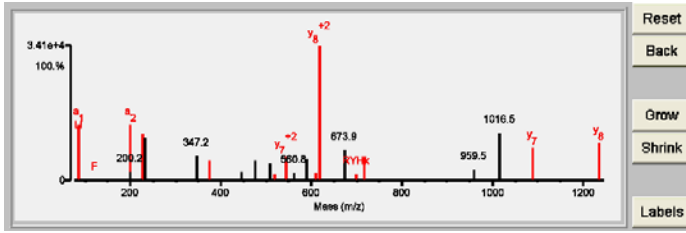

Result Summary

| Rank | Score | SPI (%) | BCS | # Unmatched Ions | # Variable sites | Sequence                      | MH <sup>+</sup> Calculated (Da) | MH <sup>+</sup> Error (Da) | MH <sup>+</sup> Error (ppm) | Protein MW(pI) (Da) | Species | Accession # | Protein Name                                                                                                           |
|------|-------|---------|-----|------------------|------------------|-------------------------------|---------------------------------|----------------------------|-----------------------------|---------------------|---------|-------------|------------------------------------------------------------------------------------------------------------------------|
| 1    | 16.07 | 80.6    | 11  | 6/25             | K374k            | (K)DNTIEHLLPLFLAQLKDECEVRR(L) | 2750.4182                       | 114.0632                   | 7.1                         | 65309.0/5.00        | HUMAN   | P30153      | Serine/threonine-protein phosphatase 2A 65 kDa regulatory subunit A alpha isoform OS=Homo sapiens GN=PPP2R1A PE=1 SV=4 |

Detailed Results

| Rank                   | Score | SPI (%) | BCS | # Unmatched Ions | # Variable sites | Sequence                      | MH <sup>+</sup> Calculated (Da) | MH <sup>+</sup> Error (Da) | MH <sup>+</sup> Error (ppm) | Protein MW(pI) (Da)   | Species               | Accession #           | MS-Digest Index #     | Protein Name                                                                                                           |                       |                       |                   |                       |                   |         |                       |          |       |                   |       |       |       |       |       |        |       |      |      |
|------------------------|-------|---------|-----|------------------|------------------|-------------------------------|---------------------------------|----------------------------|-----------------------------|-----------------------|-----------------------|-----------------------|-----------------------|------------------------------------------------------------------------------------------------------------------------|-----------------------|-----------------------|-------------------|-----------------------|-------------------|---------|-----------------------|----------|-------|-------------------|-------|-------|-------|-------|-------|--------|-------|------|------|
| 1                      | 16.07 | 80.6    | 11  | 6/25             | K374k            | (K)DNTIEHLLPLFLAQLKDECEVRR(L) | 2750.4182                       | 114.0632                   | 7.1                         | 65309.0/5.00          | HUMAN                 | P30153                | 479                   | Serine/threonine-protein phosphatase 2A 65 kDa regulatory subunit A alpha isoform OS=Homo sapiens GN=PPP2R1A PE=1 SV=4 |                       |                       |                   |                       |                   |         |                       |          |       |                   |       |       |       |       |       |        |       |      |      |
|                        |       |         |     |                  |                  |                               | 460.733                         | 500.280                    | 514.326                     | 573.760 <sup>+2</sup> | 666.852 <sup>+2</sup> | 685.816 <sup>+2</sup> | 729.845 <sup>+2</sup> | 770.418                                                                                                                | 786.381 <sup>+2</sup> | 803.427               | 823.377           | 859.936 <sup>+2</sup> | 904.387           | 936.484 | 964.980 <sup>+2</sup> | 1146.534 |       |                   |       |       |       |       |       |        |       |      |      |
| Frac. Inten.(% of TIC) |       |         |     |                  |                  |                               | 0.01                            | 0.16                       | 0.34                        | 0.24                  | 5.47                  | 3.90                  | 3.30                  | 2.67                                                                                                                   | 5.00                  | 3.39                  | 5.58              | 2.99                  | 5.32              | 3.75    | 7.16                  | 7.37     | 2.69  | 4.54              | 3.47  | 3.48  | 4.43  | 5.85  | 7.42  | 8.25   | 3.24  |      |      |
| Rel. Inten.(% of BP)   |       |         |     |                  |                  |                               | 0.09                            | 1.90                       | 4.08                        | 2.96                  | 66.32                 | 47.19                 | 39.93                 | 32.34                                                                                                                  | 60.63                 | 41.04                 | 67.56             | 36.17                 | 64.42             | 45.45   | 86.72                 | 89.24    | 32.64 | 55.00             | 42.02 | 42.22 | 53.63 | 70.86 | 89.86 | 100.00 | 39.21 |      |      |
| Score                  |       |         |     |                  |                  |                               | 0.20                            | 0.50                       | 0.22                        | 1.00                  | 1.50                  | 0.50                  | -0.47                 | 0.50                                                                                                                   | -0.41                 | 1.50                  | -0.36             | 1.50                  | -0.45             | 0.50    | 1.50                  | -0.33    | 1.50  | 1.50              | -0.33 | 1.50  | 0.50  | 0.50  | 1.50  | 1.50   | 0.50  | 1.50 | 1.50 |
| Ion-type               |       |         |     |                  |                  |                               | PR                              | KQ                         | LI                          | F                     | y1                    | bz                    | az <sup>+2</sup>      | ya                                                                                                                     | ye <sup>+2</sup>      | y10-NH3 <sup>+2</sup> | y11 <sup>+2</sup> | y12 <sup>+2</sup>     | b <sup>++14</sup> | b7      | y13 <sup>+2</sup>     | y7       | b6    | y15 <sup>+2</sup> | y8    |       |       |       |       |        |       |      |      |
| Delta ppm              |       |         |     |                  |                  |                               | 18.2                            | -2.1                       | 9.0                         | -14.8                 | -12.9                 | -18.4                 | -11.6                 | -4.6                                                                                                                   | -6.3                  | -5.8                  | -11.9             | -18.8                 | -10.6             | -22.0   | 6.2                   | 5.0      | 4.9   | -19.8             | 11.8  |       |       |       |       |        |       |      |      |

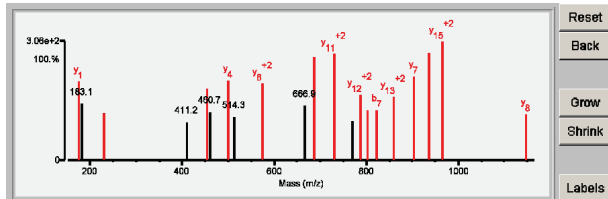

Result Summary

| Rank | Score | SPI (%) | BCS | # Unmatched Ions | Variable sites | Sequence                                            | MH <sup>+</sup> Calculated (Da) | MH <sup>+</sup> Error (Da) | MH <sup>+</sup> Error (ppm) | Protein MW (Da) | Species | Accession # | Protein Name                                                                                                           |
|------|-------|---------|-----|------------------|----------------|-----------------------------------------------------|---------------------------------|----------------------------|-----------------------------|-----------------|---------|-------------|------------------------------------------------------------------------------------------------------------------------|
| 1    | 20.01 | 89.8    | 12  | 4/25             | K546k          | (K)S LQ I G P I L D N S T L Q S E V K P I L E K (L) | 2650.5026                       | 114.0708                   | 10.1                        | 65309.0/5.00    | HUMAN   | P30153      | Serine/threonine-protein phosphatase 2A 65 kDa regulatory subunit A alpha isoform OS=Homo sapiens GN=PPP2R1A PE=1 SV=4 |
| 2    | 5.51  | 51.3    | 5   | 12/25            | K561k          | (K)S LQ I G P I L D N S T L Q S E V K P I L E K (L) | 2650.5026                       | 114.0708                   | 10.1                        | 65309.0/5.00    | HUMAN   | P30153      | Serine/threonine-protein phosphatase 2A 65 kDa regulatory subunit A alpha isoform OS=Homo sapiens GN=PPP2R1A PE=1 SV=4 |
| 3    | 4.51  | 51.3    | 4   | 12/25            | K566k          | (K)S LQ I G P I L D N S T L Q S E V K P I L E K (L) | 2650.5026                       | 114.0708                   | 10.1                        | 65309.0/5.00    | HUMAN   | P30153      | Serine/threonine-protein phosphatase 2A 65 kDa regulatory subunit A alpha isoform OS=Homo sapiens GN=PPP2R1A PE=1 SV=4 |

Detailed Results

| Rank                                                                                                                                                                                                                                                                                                                                                                                                                                                                                                                                                                                                                                                                                                                                                                                                                                                                                                                                                                                                                                                                                                                                                                                                                                                                                                                                                                                                                                                                                                                                                                                                                                                                                                                                                                                                                                                                                                                                                                                                                                                                                                                                                                                                                                                                                                                                                                                                                                                                                                                                                                                                                                                                                                                                                                                | Score  | SPI (%) | BCS    | # Unmatched Ions | Variable sites | Sequence                                             | MH <sup>+</sup> Calculated (Da) | MH <sup>+</sup> Error (Da) | MH <sup>+</sup> Error (ppm) | Protein MW (Da) | Species | Accession # | NS-Digest Index #     | Protein Name                                                                                                           |                    |         |                       |                       |                       |                       |                       |                       |                       |                        |          |         |         |                       |                       |         |         |                       |                       |                       |                       |                       |                       |                       |                        |          |                         |      |      |      |      |      |       |      |      |      |      |      |      |      |      |      |      |      |      |      |      |      |       |      |      |      |                       |      |      |      |      |       |        |       |       |       |       |       |       |       |       |       |       |       |       |       |       |       |       |       |       |       |       |      |      |      |      |      |      |       |      |      |       |       |      |      |      |      |      |      |      |      |      |      |      |      |      |      |          |    |    |    |    |    |    |    |    |    |    |    |    |                  |                   |    |    |                   |                   |                  |                       |                       |                   |                   |                   |    |           |       |      |       |  |       |       |  |  |       |  |  |  |      |     |       |      |      |     |     |      |      |     |     |      |      |
|-------------------------------------------------------------------------------------------------------------------------------------------------------------------------------------------------------------------------------------------------------------------------------------------------------------------------------------------------------------------------------------------------------------------------------------------------------------------------------------------------------------------------------------------------------------------------------------------------------------------------------------------------------------------------------------------------------------------------------------------------------------------------------------------------------------------------------------------------------------------------------------------------------------------------------------------------------------------------------------------------------------------------------------------------------------------------------------------------------------------------------------------------------------------------------------------------------------------------------------------------------------------------------------------------------------------------------------------------------------------------------------------------------------------------------------------------------------------------------------------------------------------------------------------------------------------------------------------------------------------------------------------------------------------------------------------------------------------------------------------------------------------------------------------------------------------------------------------------------------------------------------------------------------------------------------------------------------------------------------------------------------------------------------------------------------------------------------------------------------------------------------------------------------------------------------------------------------------------------------------------------------------------------------------------------------------------------------------------------------------------------------------------------------------------------------------------------------------------------------------------------------------------------------------------------------------------------------------------------------------------------------------------------------------------------------------------------------------------------------------------------------------------------------|--------|---------|--------|------------------|----------------|------------------------------------------------------|---------------------------------|----------------------------|-----------------------------|-----------------|---------|-------------|-----------------------|------------------------------------------------------------------------------------------------------------------------|--------------------|---------|-----------------------|-----------------------|-----------------------|-----------------------|-----------------------|-----------------------|-----------------------|------------------------|----------|---------|---------|-----------------------|-----------------------|---------|---------|-----------------------|-----------------------|-----------------------|-----------------------|-----------------------|-----------------------|-----------------------|------------------------|----------|-------------------------|------|------|------|------|------|-------|------|------|------|------|------|------|------|------|------|------|------|------|------|------|------|-------|------|------|------|-----------------------|------|------|------|------|-------|--------|-------|-------|-------|-------|-------|-------|-------|-------|-------|-------|-------|-------|-------|-------|-------|-------|-------|-------|-------|-------|------|------|------|------|------|------|-------|------|------|-------|-------|------|------|------|------|------|------|------|------|------|------|------|------|------|------|----------|----|----|----|----|----|----|----|----|----|----|----|----|------------------|-------------------|----|----|-------------------|-------------------|------------------|-----------------------|-----------------------|-------------------|-------------------|-------------------|----|-----------|-------|------|-------|--|-------|-------|--|--|-------|--|--|--|------|-----|-------|------|------|-----|-----|------|------|-----|-----|------|------|
| 1                                                                                                                                                                                                                                                                                                                                                                                                                                                                                                                                                                                                                                                                                                                                                                                                                                                                                                                                                                                                                                                                                                                                                                                                                                                                                                                                                                                                                                                                                                                                                                                                                                                                                                                                                                                                                                                                                                                                                                                                                                                                                                                                                                                                                                                                                                                                                                                                                                                                                                                                                                                                                                                                                                                                                                                   | 20.01  | 89.8    | 12     | 4/25             | K546k          | (K)S L Q I G P I L D N S T L Q S E V K P I L E K (L) | 2650.5026                       | 114.0708                   | 10.1                        | 65309.0/5.00    | HUMAN   | P30153      | 957                   | Serine/threonine-protein phosphatase 2A 65 kDa regulatory subunit A alpha isoform OS=Homo sapiens GN=PPP2R1A PE=1 SV=4 |                    |         |                       |                       |                       |                       |                       |                       |                       |                        |          |         |         |                       |                       |         |         |                       |                       |                       |                       |                       |                       |                       |                        |          |                         |      |      |      |      |      |       |      |      |      |      |      |      |      |      |      |      |      |      |      |      |      |       |      |      |      |                       |      |      |      |      |       |        |       |       |       |       |       |       |       |       |       |       |       |       |       |       |       |       |       |       |       |       |      |      |      |      |      |      |       |      |      |       |       |      |      |      |      |      |      |      |      |      |      |      |      |      |      |          |    |    |    |    |    |    |    |    |    |    |    |    |                  |                   |    |    |                   |                   |                  |                       |                       |                   |                   |                   |    |           |       |      |       |  |       |       |  |  |       |  |  |  |      |     |       |      |      |     |     |      |      |     |     |      |      |
| <table border="1"> <thead> <tr> <th>Fragment-ion (m/z)</th> <th>70.064</th> <th>84.080</th> <th>86.096</th> <th>101.070</th> <th>155.081</th> <th>173.127</th> <th>183.148</th> <th>201.121</th> <th>353.245</th> <th>467.257</th> <th>511.294</th> <th>599.371</th> <th>642.389<sup>+2</sup></th> <th>676.381<sup>+3</sup></th> <th>684.397</th> <th>727.466</th> <th>736.434<sup>+2</sup></th> <th>793.451<sup>+2</sup></th> <th>812.797<sup>+3</sup></th> <th>842.443<sup>+2</sup></th> <th>849.495<sup>+3</sup></th> <th>850.963<sup>+2</sup></th> <th>907.501<sup>+2</sup></th> <th>1041.093<sup>+2</sup></th> <th>1042.613</th> </tr> </thead> <tbody> <tr> <td>Frac. Inten. (% of TIC)</td> <td>0.00</td> <td>0.16</td> <td>0.40</td> <td>0.15</td> <td>3.43</td> <td>15.41</td> <td>2.67</td> <td>3.95</td> <td>3.28</td> <td>2.17</td> <td>2.07</td> <td>4.81</td> <td>2.61</td> <td>5.04</td> <td>2.51</td> <td>2.11</td> <td>3.80</td> <td>5.14</td> <td>3.17</td> <td>3.55</td> <td>6.52</td> <td>12.53</td> <td>8.99</td> <td>2.25</td> <td>2.63</td> </tr> <tr> <td>Rel. Inten. (% of BP)</td> <td>0.03</td> <td>1.07</td> <td>2.59</td> <td>0.99</td> <td>22.27</td> <td>100.00</td> <td>17.32</td> <td>25.66</td> <td>21.31</td> <td>14.11</td> <td>13.46</td> <td>31.22</td> <td>16.91</td> <td>36.61</td> <td>16.32</td> <td>13.67</td> <td>24.69</td> <td>33.37</td> <td>20.59</td> <td>23.03</td> <td>42.34</td> <td>81.33</td> <td>58.35</td> <td>14.61</td> <td>17.09</td> </tr> <tr> <td>Score</td> <td>0.20</td> <td>0.50</td> <td>0.22</td> <td>0.75</td> <td>0.50</td> <td>0.50</td> <td>-0.17</td> <td>0.50</td> <td>0.50</td> <td>-0.21</td> <td>-0.14</td> <td>1.50</td> </tr> <tr> <td>Ion-type</td> <td>PR</td> <td>KQ</td> <td>LI</td> <td>KQ</td> <td>GP</td> <td>a2</td> <td>b2</td> <td>b2</td> <td>b2</td> <td>b2</td> <td>b2</td> <td>y5</td> <td>y1<sup>+2</sup></td> <td>y18<sup>+3</sup></td> <td>b5</td> <td>y6</td> <td>y13<sup>+2</sup></td> <td>y14<sup>+2</sup></td> <td>y2<sup>+3</sup></td> <td>y15-NH3<sup>+2</sup></td> <td>y22-H2O<sup>+3</sup></td> <td>y15<sup>+2</sup></td> <td>y16<sup>+2</sup></td> <td>y19<sup>+2</sup></td> <td>y9</td> </tr> <tr> <td>Delta ppm</td> <td>-14.6</td> <td>-6.8</td> <td>-10.8</td> <td></td> <td>-12.3</td> <td>-13.0</td> <td></td> <td></td> <td>-18.2</td> <td></td> <td></td> <td></td> <td>10.3</td> <td>0.7</td> <td>-11.7</td> <td>-7.4</td> <td>16.4</td> <td>9.4</td> <td>2.4</td> <td>-0.5</td> <td>20.5</td> <td>6.8</td> <td>1.8</td> <td>14.8</td> <td>-1.2</td> </tr> </tbody> </table> |        |         |        |                  |                |                                                      |                                 |                            |                             |                 |         |             |                       |                                                                                                                        | Fragment-ion (m/z) | 70.064  | 84.080                | 86.096                | 101.070               | 155.081               | 173.127               | 183.148               | 201.121               | 353.245                | 467.257  | 511.294 | 599.371 | 642.389 <sup>+2</sup> | 676.381 <sup>+3</sup> | 684.397 | 727.466 | 736.434 <sup>+2</sup> | 793.451 <sup>+2</sup> | 812.797 <sup>+3</sup> | 842.443 <sup>+2</sup> | 849.495 <sup>+3</sup> | 850.963 <sup>+2</sup> | 907.501 <sup>+2</sup> | 1041.093 <sup>+2</sup> | 1042.613 | Frac. Inten. (% of TIC) | 0.00 | 0.16 | 0.40 | 0.15 | 3.43 | 15.41 | 2.67 | 3.95 | 3.28 | 2.17 | 2.07 | 4.81 | 2.61 | 5.04 | 2.51 | 2.11 | 3.80 | 5.14 | 3.17 | 3.55 | 6.52 | 12.53 | 8.99 | 2.25 | 2.63 | Rel. Inten. (% of BP) | 0.03 | 1.07 | 2.59 | 0.99 | 22.27 | 100.00 | 17.32 | 25.66 | 21.31 | 14.11 | 13.46 | 31.22 | 16.91 | 36.61 | 16.32 | 13.67 | 24.69 | 33.37 | 20.59 | 23.03 | 42.34 | 81.33 | 58.35 | 14.61 | 17.09 | Score | 0.20 | 0.50 | 0.22 | 0.75 | 0.50 | 0.50 | -0.17 | 0.50 | 0.50 | -0.21 | -0.14 | 1.50 | 1.50 | 1.50 | 1.50 | 1.50 | 1.50 | 1.50 | 1.50 | 1.50 | 1.50 | 1.50 | 1.50 | 1.50 | 1.50 | Ion-type | PR | KQ | LI | KQ | GP | a2 | b2 | b2 | b2 | b2 | b2 | y5 | y1 <sup>+2</sup> | y18 <sup>+3</sup> | b5 | y6 | y13 <sup>+2</sup> | y14 <sup>+2</sup> | y2 <sup>+3</sup> | y15-NH3 <sup>+2</sup> | y22-H2O <sup>+3</sup> | y15 <sup>+2</sup> | y16 <sup>+2</sup> | y19 <sup>+2</sup> | y9 | Delta ppm | -14.6 | -6.8 | -10.8 |  | -12.3 | -13.0 |  |  | -18.2 |  |  |  | 10.3 | 0.7 | -11.7 | -7.4 | 16.4 | 9.4 | 2.4 | -0.5 | 20.5 | 6.8 | 1.8 | 14.8 | -1.2 |
| Fragment-ion (m/z)                                                                                                                                                                                                                                                                                                                                                                                                                                                                                                                                                                                                                                                                                                                                                                                                                                                                                                                                                                                                                                                                                                                                                                                                                                                                                                                                                                                                                                                                                                                                                                                                                                                                                                                                                                                                                                                                                                                                                                                                                                                                                                                                                                                                                                                                                                                                                                                                                                                                                                                                                                                                                                                                                                                                                                  | 70.064 | 84.080  | 86.096 | 101.070          | 155.081        | 173.127                                              | 183.148                         | 201.121                    | 353.245                     | 467.257         | 511.294 | 599.371     | 642.389 <sup>+2</sup> | 676.381 <sup>+3</sup>                                                                                                  | 684.397            | 727.466 | 736.434 <sup>+2</sup> | 793.451 <sup>+2</sup> | 812.797 <sup>+3</sup> | 842.443 <sup>+2</sup> | 849.495 <sup>+3</sup> | 850.963 <sup>+2</sup> | 907.501 <sup>+2</sup> | 1041.093 <sup>+2</sup> | 1042.613 |         |         |                       |                       |         |         |                       |                       |                       |                       |                       |                       |                       |                        |          |                         |      |      |      |      |      |       |      |      |      |      |      |      |      |      |      |      |      |      |      |      |      |       |      |      |      |                       |      |      |      |      |       |        |       |       |       |       |       |       |       |       |       |       |       |       |       |       |       |       |       |       |       |       |      |      |      |      |      |      |       |      |      |       |       |      |      |      |      |      |      |      |      |      |      |      |      |      |      |          |    |    |    |    |    |    |    |    |    |    |    |    |                  |                   |    |    |                   |                   |                  |                       |                       |                   |                   |                   |    |           |       |      |       |  |       |       |  |  |       |  |  |  |      |     |       |      |      |     |     |      |      |     |     |      |      |
| Frac. Inten. (% of TIC)                                                                                                                                                                                                                                                                                                                                                                                                                                                                                                                                                                                                                                                                                                                                                                                                                                                                                                                                                                                                                                                                                                                                                                                                                                                                                                                                                                                                                                                                                                                                                                                                                                                                                                                                                                                                                                                                                                                                                                                                                                                                                                                                                                                                                                                                                                                                                                                                                                                                                                                                                                                                                                                                                                                                                             | 0.00   | 0.16    | 0.40   | 0.15             | 3.43           | 15.41                                                | 2.67                            | 3.95                       | 3.28                        | 2.17            | 2.07    | 4.81        | 2.61                  | 5.04                                                                                                                   | 2.51               | 2.11    | 3.80                  | 5.14                  | 3.17                  | 3.55                  | 6.52                  | 12.53                 | 8.99                  | 2.25                   | 2.63     |         |         |                       |                       |         |         |                       |                       |                       |                       |                       |                       |                       |                        |          |                         |      |      |      |      |      |       |      |      |      |      |      |      |      |      |      |      |      |      |      |      |      |       |      |      |      |                       |      |      |      |      |       |        |       |       |       |       |       |       |       |       |       |       |       |       |       |       |       |       |       |       |       |       |      |      |      |      |      |      |       |      |      |       |       |      |      |      |      |      |      |      |      |      |      |      |      |      |      |          |    |    |    |    |    |    |    |    |    |    |    |    |                  |                   |    |    |                   |                   |                  |                       |                       |                   |                   |                   |    |           |       |      |       |  |       |       |  |  |       |  |  |  |      |     |       |      |      |     |     |      |      |     |     |      |      |
| Rel. Inten. (% of BP)                                                                                                                                                                                                                                                                                                                                                                                                                                                                                                                                                                                                                                                                                                                                                                                                                                                                                                                                                                                                                                                                                                                                                                                                                                                                                                                                                                                                                                                                                                                                                                                                                                                                                                                                                                                                                                                                                                                                                                                                                                                                                                                                                                                                                                                                                                                                                                                                                                                                                                                                                                                                                                                                                                                                                               | 0.03   | 1.07    | 2.59   | 0.99             | 22.27          | 100.00                                               | 17.32                           | 25.66                      | 21.31                       | 14.11           | 13.46   | 31.22       | 16.91                 | 36.61                                                                                                                  | 16.32              | 13.67   | 24.69                 | 33.37                 | 20.59                 | 23.03                 | 42.34                 | 81.33                 | 58.35                 | 14.61                  | 17.09    |         |         |                       |                       |         |         |                       |                       |                       |                       |                       |                       |                       |                        |          |                         |      |      |      |      |      |       |      |      |      |      |      |      |      |      |      |      |      |      |      |      |      |       |      |      |      |                       |      |      |      |      |       |        |       |       |       |       |       |       |       |       |       |       |       |       |       |       |       |       |       |       |       |       |      |      |      |      |      |      |       |      |      |       |       |      |      |      |      |      |      |      |      |      |      |      |      |      |      |          |    |    |    |    |    |    |    |    |    |    |    |    |                  |                   |    |    |                   |                   |                  |                       |                       |                   |                   |                   |    |           |       |      |       |  |       |       |  |  |       |  |  |  |      |     |       |      |      |     |     |      |      |     |     |      |      |
| Score                                                                                                                                                                                                                                                                                                                                                                                                                                                                                                                                                                                                                                                                                                                                                                                                                                                                                                                                                                                                                                                                                                                                                                                                                                                                                                                                                                                                                                                                                                                                                                                                                                                                                                                                                                                                                                                                                                                                                                                                                                                                                                                                                                                                                                                                                                                                                                                                                                                                                                                                                                                                                                                                                                                                                                               | 0.20   | 0.50    | 0.22   | 0.75             | 0.50           | 0.50                                                 | -0.17                           | 0.50                       | 0.50                        | -0.21           | -0.14   | 1.50        | 1.50                  | 1.50                                                                                                                   | 1.50               | 1.50    | 1.50                  | 1.50                  | 1.50                  | 1.50                  | 1.50                  | 1.50                  | 1.50                  | 1.50                   | 1.50     |         |         |                       |                       |         |         |                       |                       |                       |                       |                       |                       |                       |                        |          |                         |      |      |      |      |      |       |      |      |      |      |      |      |      |      |      |      |      |      |      |      |      |       |      |      |      |                       |      |      |      |      |       |        |       |       |       |       |       |       |       |       |       |       |       |       |       |       |       |       |       |       |       |       |      |      |      |      |      |      |       |      |      |       |       |      |      |      |      |      |      |      |      |      |      |      |      |      |      |          |    |    |    |    |    |    |    |    |    |    |    |    |                  |                   |    |    |                   |                   |                  |                       |                       |                   |                   |                   |    |           |       |      |       |  |       |       |  |  |       |  |  |  |      |     |       |      |      |     |     |      |      |     |     |      |      |
| Ion-type                                                                                                                                                                                                                                                                                                                                                                                                                                                                                                                                                                                                                                                                                                                                                                                                                                                                                                                                                                                                                                                                                                                                                                                                                                                                                                                                                                                                                                                                                                                                                                                                                                                                                                                                                                                                                                                                                                                                                                                                                                                                                                                                                                                                                                                                                                                                                                                                                                                                                                                                                                                                                                                                                                                                                                            | PR     | KQ      | LI     | KQ               | GP             | a2                                                   | b2                              | b2                         | b2                          | b2              | b2      | y5          | y1 <sup>+2</sup>      | y18 <sup>+3</sup>                                                                                                      | b5                 | y6      | y13 <sup>+2</sup>     | y14 <sup>+2</sup>     | y2 <sup>+3</sup>      | y15-NH3 <sup>+2</sup> | y22-H2O <sup>+3</sup> | y15 <sup>+2</sup>     | y16 <sup>+2</sup>     | y19 <sup>+2</sup>      | y9       |         |         |                       |                       |         |         |                       |                       |                       |                       |                       |                       |                       |                        |          |                         |      |      |      |      |      |       |      |      |      |      |      |      |      |      |      |      |      |      |      |      |      |       |      |      |      |                       |      |      |      |      |       |        |       |       |       |       |       |       |       |       |       |       |       |       |       |       |       |       |       |       |       |       |      |      |      |      |      |      |       |      |      |       |       |      |      |      |      |      |      |      |      |      |      |      |      |      |      |          |    |    |    |    |    |    |    |    |    |    |    |    |                  |                   |    |    |                   |                   |                  |                       |                       |                   |                   |                   |    |           |       |      |       |  |       |       |  |  |       |  |  |  |      |     |       |      |      |     |     |      |      |     |     |      |      |
| Delta ppm                                                                                                                                                                                                                                                                                                                                                                                                                                                                                                                                                                                                                                                                                                                                                                                                                                                                                                                                                                                                                                                                                                                                                                                                                                                                                                                                                                                                                                                                                                                                                                                                                                                                                                                                                                                                                                                                                                                                                                                                                                                                                                                                                                                                                                                                                                                                                                                                                                                                                                                                                                                                                                                                                                                                                                           | -14.6  | -6.8    | -10.8  |                  | -12.3          | -13.0                                                |                                 |                            | -18.2                       |                 |         |             | 10.3                  | 0.7                                                                                                                    | -11.7              | -7.4    | 16.4                  | 9.4                   | 2.4                   | -0.5                  | 20.5                  | 6.8                   | 1.8                   | 14.8                   | -1.2     |         |         |                       |                       |         |         |                       |                       |                       |                       |                       |                       |                       |                        |          |                         |      |      |      |      |      |       |      |      |      |      |      |      |      |      |      |      |      |      |      |      |      |       |      |      |      |                       |      |      |      |      |       |        |       |       |       |       |       |       |       |       |       |       |       |       |       |       |       |       |       |       |       |       |      |      |      |      |      |      |       |      |      |       |       |      |      |      |      |      |      |      |      |      |      |      |      |      |      |          |    |    |    |    |    |    |    |    |    |    |    |    |                  |                   |    |    |                   |                   |                  |                       |                       |                   |                   |                   |    |           |       |      |       |  |       |       |  |  |       |  |  |  |      |     |       |      |      |     |     |      |      |     |     |      |      |

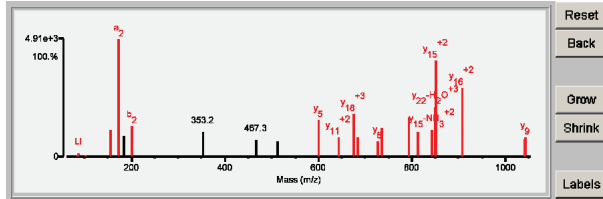

Result Summary

| Rank | Score | SPI (%) | BCS | # Unmatched Ions | Variable sites | Sequence              | MH <sup>+</sup> Calculated (Da) | MH <sup>+</sup> Error (Da) | MH <sup>+</sup> Error (ppm) | Protein MW/pI (Da) | Species | Accession # | Protein Name                                                                                                |
|------|-------|---------|-----|------------------|----------------|-----------------------|---------------------------------|----------------------------|-----------------------------|--------------------|---------|-------------|-------------------------------------------------------------------------------------------------------------|
| 1    | 18.58 | 84.8    | 10  | 5/25             | K41k           | (K)EILTKESNVQEV(R)(C) | 1544.8279                       | 114.0506                   | 4.6                         | 35594.4/5.30       | HUMAN   | P67775      | Serine/threonine-protein phosphatase 2A catalytic subunit alpha isoform OS=Homo sapiens GN=PPP2CA PE=1 SV=1 |
| 1    | 18.58 | 84.8    | 10  | 5/25             | K41k           | (K)EILTKESNVQEV(R)(C) | 1544.8279                       | 114.0506                   | 4.6                         | 35575.3/5.21       | HUMAN   | P62714      | Serine/threonine-protein phosphatase 2A catalytic subunit beta isoform OS=Homo sapiens GN=PPP2CB PE=1 SV=1  |

Detailed Results

| Rank | Score | SPI (%) | BCS | # Unmatched Ions | Variable sites | Sequence              | MH <sup>+</sup> Calculated (Da) | MH <sup>+</sup> Error (Da) | MH <sup>+</sup> Error (ppm) | Protein MW/pI (Da) | Species | Accession # | MS-Digest Index # | Protein Name                                                                                                |
|------|-------|---------|-----|------------------|----------------|-----------------------|---------------------------------|----------------------------|-----------------------------|--------------------|---------|-------------|-------------------|-------------------------------------------------------------------------------------------------------------|
| 1    | 18.58 | 84.8    | 10  | 5/25             | K41k           | (K)EILTKESNVQEV(R)(C) | 1544.8279                       | 114.0506                   | 4.6                         | 35594.4/5.30       | HUMAN   | P67775      | 255402            | Serine/threonine-protein phosphatase 2A catalytic subunit alpha isoform OS=Homo sapiens GN=PPP2CA PE=1 SV=1 |
| 1    | 18.58 | 84.8    | 10  | 5/25             | K41k           | (K)EILTKESNVQEV(R)(C) | 1544.8279                       | 114.0506                   | 4.6                         | 35575.3/5.21       | HUMAN   | P62714      | 255409            | Serine/threonine-protein phosphatase 2A catalytic subunit beta isoform OS=Homo sapiens GN=PPP2CB PE=1 SV=1  |

| Fragment-ion (m/z)      | 60.054 | 72.082 | 84.044 | 84.079 | 86.096 | 87.054 | 129.065 | 175.117             | 197.128 | 215.137 | 274.183 | 403.234            | 472.228 | 514.264 | 531.296 | 532.309 <sup>+2</sup> | 573.278 <sup>+2</sup> | 601.805 <sup>+2</sup> | 630.354 | 635.308 | 643.311 <sup>+2</sup>              | 652.333 <sup>+2</sup> | 744.385           | 831.422 | 960.459 |       |    |       |    |       |
|-------------------------|--------|--------|--------|--------|--------|--------|---------|---------------------|---------|---------|---------|--------------------|---------|---------|---------|-----------------------|-----------------------|-----------------------|---------|---------|------------------------------------|-----------------------|-------------------|---------|---------|-------|----|-------|----|-------|
| Frac. Inten. (% of TIC) | 2.55   | 0.30   | 0.22   | 0.31   | 0.40   | 0.09   | 0.12    | 5.11                | 10.42   | 10.67   | 5.14    | 4.27               | 3.26    | 3.31    | 9.32    | 3.76                  | 2.89                  | 7.49                  | 2.97    | 2.70    | 5.57                               | 4.72                  | 4.40              | 4.68    | 5.34    |       |    |       |    |       |
| Rel. Inten. (% of BP)   | 23.95  | 2.78   | 2.08   | 2.95   | 3.74   | 0.84   | 1.13    | 47.89               | 97.74   | 100.00  | 48.19   | 40.03              | 30.54   | 30.99   | 87.38   | 35.22                 | 27.05                 | 70.21                 | 27.84   | 25.33   | 52.26                              | 44.28                 | 41.25             | 43.85   | 50.04   |       |    |       |    |       |
| Score                   | -0.24  | 0.50   | 1.00   | 0.50   | 0.22   | 0.33   | 0.20    | 1.50                | 0.50    | 0.75    | 1.50    | 1.50               | -0.31   | 0.50    | 1.50    | -0.35                 | -0.27                 | 1.50                  | 1.50    | -0.25   | 0.50                               | 1.50                  | 1.50              | 1.50    | 1.50    |       |    |       |    |       |
| Ion-type                | V      | E      | KQ     | LI     | NR     | QKR    | Y1      | LT-H <sub>2</sub> O | Q2      | Y2      | Y3      | Y4-NH <sub>2</sub> | Y4      | Y4      | Y4      | Y4                    | Y4                    | Y4                    | Y4      | Y4      | Y4                                 | Y4                    | Y4                | Y4      | Y4      |       |    |       |    |       |
| Delta ppm               | 11.4   | -9.4   | -15.2  | -9.6   | -17.1  | -10.5  | -10.0   | -10.4               | -14.0   | LT      | -14.8   | 9.0                |         | 3.3     | 14.4    |                       |                       | Y9                    | -7.7    | -4.4    | Y10-H <sub>2</sub> O <sup>+2</sup> | -26.9                 | Y10 <sup>+2</sup> | -0.3    | Y6      | -20.1 | Y7 | -12.0 | Y8 | -15.9 |

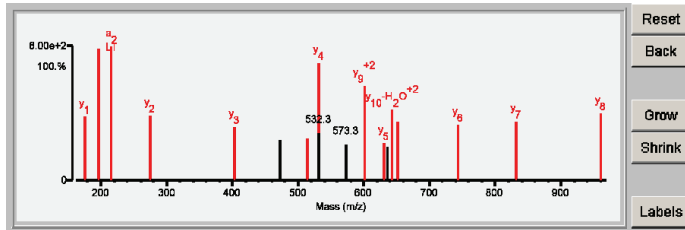



Result Summary

| Rank | Score | SPI (%) | BCS | # Unmatched Ions | # Variable sites | Sequence             | MH <sup>+</sup> Calculated (Da) | MH <sup>+</sup> Error (Da) | MH <sup>+</sup> Error (ppm) | Protein MW/pl (Da) | Species | Accession # | Protein Name                                                                  |
|------|-------|---------|-----|------------------|------------------|----------------------|---------------------------------|----------------------------|-----------------------------|--------------------|---------|-------------|-------------------------------------------------------------------------------|
| 1    | 19.65 | 83.4    | 12  | 6/25             | K391k            | (K)ISQGNISKACLILR(S) | 1572.8890                       | 114.0490                   | 3.6                         | 74606.6/9.31       | HUMAN   | O76094      | Signal recognition particle 72 kDa protein OS=Homo sapiens GN=SRP72 PE=1 SV=3 |

Detailed Results

| Rank                                                                                                                                                                                                                                                                                                                                                                                                                                                                                                                                                                                                                                                                                                                                                                                                                                                                                                                                                                                                                                                                                                                                                                                                                                                                                                                                                                                                                                                                                                                                                                                                                                                                                                                                                                                                                                                                                                                                                                                                                                                                                                                                                                                                                                                                                                                                                                                                                                                                                                                                                                                                                                                                                                                                                                                                                                      | Score  | SPI (%) | BCS    | # Unmatched Ions | # Variable sites | Sequence                           | MH <sup>+</sup> Calculated (Da) | MH <sup>+</sup> Error (Da) | MH <sup>+</sup> Error (ppm) | Protein MW/pl (Da) | Species | Accession # | MS-Digest Index # | Protein Name                                                                  |                    |         |                       |         |         |                       |         |         |                       |         |          |         |         |         |         |         |         |                       |         |         |                       |         |         |                       |         |          |                        |      |      |      |      |       |      |      |      |      |      |      |      |      |      |      |      |      |      |      |      |      |      |      |      |      |                      |      |      |      |      |        |      |       |       |       |       |      |      |       |      |      |      |      |      |       |       |       |       |       |      |       |       |       |      |       |      |      |    |       |      |      |      |       |      |      |       |      |      |      |      |      |      |       |      |      |      |      |          |  |    |  |    |  |  |    |    |    |    |  |    |    |  |  |    |                  |    |    |                   |  |    |                   |    |    |           |  |       |  |       |  |  |  |       |     |       |  |       |      |      |  |      |     |       |       |      |  |      |      |       |      |  |  |  |  |  |  |  |  |       |  |    |  |  |  |  |       |  |  |  |  |  |  |  |  |  |  |
|-------------------------------------------------------------------------------------------------------------------------------------------------------------------------------------------------------------------------------------------------------------------------------------------------------------------------------------------------------------------------------------------------------------------------------------------------------------------------------------------------------------------------------------------------------------------------------------------------------------------------------------------------------------------------------------------------------------------------------------------------------------------------------------------------------------------------------------------------------------------------------------------------------------------------------------------------------------------------------------------------------------------------------------------------------------------------------------------------------------------------------------------------------------------------------------------------------------------------------------------------------------------------------------------------------------------------------------------------------------------------------------------------------------------------------------------------------------------------------------------------------------------------------------------------------------------------------------------------------------------------------------------------------------------------------------------------------------------------------------------------------------------------------------------------------------------------------------------------------------------------------------------------------------------------------------------------------------------------------------------------------------------------------------------------------------------------------------------------------------------------------------------------------------------------------------------------------------------------------------------------------------------------------------------------------------------------------------------------------------------------------------------------------------------------------------------------------------------------------------------------------------------------------------------------------------------------------------------------------------------------------------------------------------------------------------------------------------------------------------------------------------------------------------------------------------------------------------------|--------|---------|--------|------------------|------------------|------------------------------------|---------------------------------|----------------------------|-----------------------------|--------------------|---------|-------------|-------------------|-------------------------------------------------------------------------------|--------------------|---------|-----------------------|---------|---------|-----------------------|---------|---------|-----------------------|---------|----------|---------|---------|---------|---------|---------|---------|-----------------------|---------|---------|-----------------------|---------|---------|-----------------------|---------|----------|------------------------|------|------|------|------|-------|------|------|------|------|------|------|------|------|------|------|------|------|------|------|------|------|------|------|------|------|----------------------|------|------|------|------|--------|------|-------|-------|-------|-------|------|------|-------|------|------|------|------|------|-------|-------|-------|-------|-------|------|-------|-------|-------|------|-------|------|------|----|-------|------|------|------|-------|------|------|-------|------|------|------|------|------|------|-------|------|------|------|------|----------|--|----|--|----|--|--|----|----|----|----|--|----|----|--|--|----|------------------|----|----|-------------------|--|----|-------------------|----|----|-----------|--|-------|--|-------|--|--|--|-------|-----|-------|--|-------|------|------|--|------|-----|-------|-------|------|--|------|------|-------|------|--|--|--|--|--|--|--|--|-------|--|----|--|--|--|--|-------|--|--|--|--|--|--|--|--|--|--|
| 1                                                                                                                                                                                                                                                                                                                                                                                                                                                                                                                                                                                                                                                                                                                                                                                                                                                                                                                                                                                                                                                                                                                                                                                                                                                                                                                                                                                                                                                                                                                                                                                                                                                                                                                                                                                                                                                                                                                                                                                                                                                                                                                                                                                                                                                                                                                                                                                                                                                                                                                                                                                                                                                                                                                                                                                                                                         | 19.65  | 83.4    | 12     | 6/25             | K391k            | (K)I/S/Q/G N\I/S/K/A/C/L/I/L/R (S) | 1572.8890                       | 114.0490                   | 3.6                         | 74606.6/9.31       | HUMAN   | O76094      | 732129            | Signal recognition particle 72 kDa protein OS=Homo sapiens GN=SRP72 PE=1 SV=3 |                    |         |                       |         |         |                       |         |         |                       |         |          |         |         |         |         |         |         |                       |         |         |                       |         |         |                       |         |          |                        |      |      |      |      |       |      |      |      |      |      |      |      |      |      |      |      |      |      |      |      |      |      |      |      |      |                      |      |      |      |      |        |      |       |       |       |       |      |      |       |      |      |      |      |      |       |       |       |       |       |      |       |       |       |      |       |      |      |    |       |      |      |      |       |      |      |       |      |      |      |      |      |      |       |      |      |      |      |          |  |    |  |    |  |  |    |    |    |    |  |    |    |  |  |    |                  |    |    |                   |  |    |                   |    |    |           |  |       |  |       |  |  |  |       |     |       |  |       |      |      |  |      |     |       |       |      |  |      |      |       |      |  |  |  |  |  |  |  |  |       |  |    |  |  |  |  |       |  |  |  |  |  |  |  |  |  |  |
| <table border="1"> <thead> <tr> <th>Fragment-ion (m/z)</th> <th>60.050</th> <th>70.064</th> <th>84.044</th> <th>84.079</th> <th>86.095</th> <th>101.069</th> <th>105.064</th> <th>173.127</th> <th>175.119</th> <th>201.122</th> <th>283.101</th> <th>288.201</th> <th>401.283</th> <th>466.194</th> <th>500.260</th> <th>514.374</th> <th>537.809<sup>+2</sup></th> <th>613.311</th> <th>674.394</th> <th>679.877<sup>+2</sup></th> <th>735.387</th> <th>745.436</th> <th>787.421<sup>+2</sup></th> <th>987.566</th> <th>1074.604</th> </tr> </thead> <tbody> <tr> <td>Frac. Inten.(% of TIC)</td> <td>2.01</td> <td>0.00</td> <td>2.91</td> <td>0.24</td> <td>30.00</td> <td>0.07</td> <td>3.60</td> <td>3.76</td> <td>3.69</td> <td>3.04</td> <td>1.64</td> <td>2.24</td> <td>3.00</td> <td>1.88</td> <td>1.74</td> <td>2.27</td> <td>2.62</td> <td>2.73</td> <td>5.41</td> <td>3.17</td> <td>4.51</td> <td>7.97</td> <td>4.36</td> <td>2.27</td> <td>4.84</td> </tr> <tr> <td>Rel. Inten.(% of BP)</td> <td>6.72</td> <td>0.01</td> <td>9.70</td> <td>0.80</td> <td>100.00</td> <td>0.23</td> <td>12.00</td> <td>12.54</td> <td>12.30</td> <td>10.15</td> <td>5.48</td> <td>7.47</td> <td>10.01</td> <td>6.28</td> <td>5.80</td> <td>7.57</td> <td>8.74</td> <td>9.10</td> <td>18.04</td> <td>10.55</td> <td>15.02</td> <td>26.58</td> <td>14.53</td> <td>7.56</td> <td>16.15</td> </tr> <tr> <td>Score</td> <td>-0.07</td> <td>0.20</td> <td>-0.10</td> <td>0.50</td> <td>0.50</td> <td>a1</td> <td>-0.12</td> <td>0.50</td> <td>1.50</td> <td>0.75</td> <td>-0.05</td> <td>1.50</td> <td>1.50</td> <td>-0.06</td> <td>0.75</td> <td>1.50</td> <td>1.50</td> <td>0.50</td> <td>1.50</td> <td>1.50</td> <td>-0.15</td> <td>1.50</td> <td>1.50</td> <td>1.50</td> <td>1.50</td> </tr> <tr> <td>Ion-type</td> <td></td> <td>PR</td> <td></td> <td>KQ</td> <td></td> <td></td> <td>KQ</td> <td>a2</td> <td>y1</td> <td>b2</td> <td></td> <td>y2</td> <td>y3</td> <td></td> <td></td> <td>y4</td> <td>y8<sup>+2</sup></td> <td>b6</td> <td>y5</td> <td>y11<sup>+2</sup></td> <td></td> <td>y6</td> <td>y13<sup>+2</sup></td> <td>y7</td> <td>y8</td> </tr> <tr> <td>Delta ppm</td> <td></td> <td>-20.3</td> <td></td> <td>-18.7</td> <td></td> <td></td> <td></td> <td>-29.3</td> <td>2.6</td> <td>-13.0</td> <td></td> <td>-13.3</td> <td>-6.6</td> <td>-9.2</td> <td></td> <td>25.3</td> <td>1.4</td> <td>-33.4</td> <td>-11.9</td> <td>-8.1</td> <td></td> <td>-3.8</td> <td>-8.9</td> <td>-11.0</td> <td>-4.8</td> </tr> <tr> <td></td> <td></td> <td></td> <td></td> <td></td> <td></td> <td></td> <td></td> <td>IS-28</td> <td></td> <td>IS</td> <td></td> <td></td> <td></td> <td></td> <td>QGNIS</td> <td></td> </tr> </tbody> </table> |        |         |        |                  |                  |                                    |                                 |                            |                             |                    |         |             |                   |                                                                               | Fragment-ion (m/z) | 60.050  | 70.064                | 84.044  | 84.079  | 86.095                | 101.069 | 105.064 | 173.127               | 175.119 | 201.122  | 283.101 | 288.201 | 401.283 | 466.194 | 500.260 | 514.374 | 537.809 <sup>+2</sup> | 613.311 | 674.394 | 679.877 <sup>+2</sup> | 735.387 | 745.436 | 787.421 <sup>+2</sup> | 987.566 | 1074.604 | Frac. Inten.(% of TIC) | 2.01 | 0.00 | 2.91 | 0.24 | 30.00 | 0.07 | 3.60 | 3.76 | 3.69 | 3.04 | 1.64 | 2.24 | 3.00 | 1.88 | 1.74 | 2.27 | 2.62 | 2.73 | 5.41 | 3.17 | 4.51 | 7.97 | 4.36 | 2.27 | 4.84 | Rel. Inten.(% of BP) | 6.72 | 0.01 | 9.70 | 0.80 | 100.00 | 0.23 | 12.00 | 12.54 | 12.30 | 10.15 | 5.48 | 7.47 | 10.01 | 6.28 | 5.80 | 7.57 | 8.74 | 9.10 | 18.04 | 10.55 | 15.02 | 26.58 | 14.53 | 7.56 | 16.15 | Score | -0.07 | 0.20 | -0.10 | 0.50 | 0.50 | a1 | -0.12 | 0.50 | 1.50 | 0.75 | -0.05 | 1.50 | 1.50 | -0.06 | 0.75 | 1.50 | 1.50 | 0.50 | 1.50 | 1.50 | -0.15 | 1.50 | 1.50 | 1.50 | 1.50 | Ion-type |  | PR |  | KQ |  |  | KQ | a2 | y1 | b2 |  | y2 | y3 |  |  | y4 | y8 <sup>+2</sup> | b6 | y5 | y11 <sup>+2</sup> |  | y6 | y13 <sup>+2</sup> | y7 | y8 | Delta ppm |  | -20.3 |  | -18.7 |  |  |  | -29.3 | 2.6 | -13.0 |  | -13.3 | -6.6 | -9.2 |  | 25.3 | 1.4 | -33.4 | -11.9 | -8.1 |  | -3.8 | -8.9 | -11.0 | -4.8 |  |  |  |  |  |  |  |  | IS-28 |  | IS |  |  |  |  | QGNIS |  |  |  |  |  |  |  |  |  |  |
| Fragment-ion (m/z)                                                                                                                                                                                                                                                                                                                                                                                                                                                                                                                                                                                                                                                                                                                                                                                                                                                                                                                                                                                                                                                                                                                                                                                                                                                                                                                                                                                                                                                                                                                                                                                                                                                                                                                                                                                                                                                                                                                                                                                                                                                                                                                                                                                                                                                                                                                                                                                                                                                                                                                                                                                                                                                                                                                                                                                                                        | 60.050 | 70.064  | 84.044 | 84.079           | 86.095           | 101.069                            | 105.064                         | 173.127                    | 175.119                     | 201.122            | 283.101 | 288.201     | 401.283           | 466.194                                                                       | 500.260            | 514.374 | 537.809 <sup>+2</sup> | 613.311 | 674.394 | 679.877 <sup>+2</sup> | 735.387 | 745.436 | 787.421 <sup>+2</sup> | 987.566 | 1074.604 |         |         |         |         |         |         |                       |         |         |                       |         |         |                       |         |          |                        |      |      |      |      |       |      |      |      |      |      |      |      |      |      |      |      |      |      |      |      |      |      |      |      |      |                      |      |      |      |      |        |      |       |       |       |       |      |      |       |      |      |      |      |      |       |       |       |       |       |      |       |       |       |      |       |      |      |    |       |      |      |      |       |      |      |       |      |      |      |      |      |      |       |      |      |      |      |          |  |    |  |    |  |  |    |    |    |    |  |    |    |  |  |    |                  |    |    |                   |  |    |                   |    |    |           |  |       |  |       |  |  |  |       |     |       |  |       |      |      |  |      |     |       |       |      |  |      |      |       |      |  |  |  |  |  |  |  |  |       |  |    |  |  |  |  |       |  |  |  |  |  |  |  |  |  |  |
| Frac. Inten.(% of TIC)                                                                                                                                                                                                                                                                                                                                                                                                                                                                                                                                                                                                                                                                                                                                                                                                                                                                                                                                                                                                                                                                                                                                                                                                                                                                                                                                                                                                                                                                                                                                                                                                                                                                                                                                                                                                                                                                                                                                                                                                                                                                                                                                                                                                                                                                                                                                                                                                                                                                                                                                                                                                                                                                                                                                                                                                                    | 2.01   | 0.00    | 2.91   | 0.24             | 30.00            | 0.07                               | 3.60                            | 3.76                       | 3.69                        | 3.04               | 1.64    | 2.24        | 3.00              | 1.88                                                                          | 1.74               | 2.27    | 2.62                  | 2.73    | 5.41    | 3.17                  | 4.51    | 7.97    | 4.36                  | 2.27    | 4.84     |         |         |         |         |         |         |                       |         |         |                       |         |         |                       |         |          |                        |      |      |      |      |       |      |      |      |      |      |      |      |      |      |      |      |      |      |      |      |      |      |      |      |      |                      |      |      |      |      |        |      |       |       |       |       |      |      |       |      |      |      |      |      |       |       |       |       |       |      |       |       |       |      |       |      |      |    |       |      |      |      |       |      |      |       |      |      |      |      |      |      |       |      |      |      |      |          |  |    |  |    |  |  |    |    |    |    |  |    |    |  |  |    |                  |    |    |                   |  |    |                   |    |    |           |  |       |  |       |  |  |  |       |     |       |  |       |      |      |  |      |     |       |       |      |  |      |      |       |      |  |  |  |  |  |  |  |  |       |  |    |  |  |  |  |       |  |  |  |  |  |  |  |  |  |  |
| Rel. Inten.(% of BP)                                                                                                                                                                                                                                                                                                                                                                                                                                                                                                                                                                                                                                                                                                                                                                                                                                                                                                                                                                                                                                                                                                                                                                                                                                                                                                                                                                                                                                                                                                                                                                                                                                                                                                                                                                                                                                                                                                                                                                                                                                                                                                                                                                                                                                                                                                                                                                                                                                                                                                                                                                                                                                                                                                                                                                                                                      | 6.72   | 0.01    | 9.70   | 0.80             | 100.00           | 0.23                               | 12.00                           | 12.54                      | 12.30                       | 10.15              | 5.48    | 7.47        | 10.01             | 6.28                                                                          | 5.80               | 7.57    | 8.74                  | 9.10    | 18.04   | 10.55                 | 15.02   | 26.58   | 14.53                 | 7.56    | 16.15    |         |         |         |         |         |         |                       |         |         |                       |         |         |                       |         |          |                        |      |      |      |      |       |      |      |      |      |      |      |      |      |      |      |      |      |      |      |      |      |      |      |      |      |                      |      |      |      |      |        |      |       |       |       |       |      |      |       |      |      |      |      |      |       |       |       |       |       |      |       |       |       |      |       |      |      |    |       |      |      |      |       |      |      |       |      |      |      |      |      |      |       |      |      |      |      |          |  |    |  |    |  |  |    |    |    |    |  |    |    |  |  |    |                  |    |    |                   |  |    |                   |    |    |           |  |       |  |       |  |  |  |       |     |       |  |       |      |      |  |      |     |       |       |      |  |      |      |       |      |  |  |  |  |  |  |  |  |       |  |    |  |  |  |  |       |  |  |  |  |  |  |  |  |  |  |
| Score                                                                                                                                                                                                                                                                                                                                                                                                                                                                                                                                                                                                                                                                                                                                                                                                                                                                                                                                                                                                                                                                                                                                                                                                                                                                                                                                                                                                                                                                                                                                                                                                                                                                                                                                                                                                                                                                                                                                                                                                                                                                                                                                                                                                                                                                                                                                                                                                                                                                                                                                                                                                                                                                                                                                                                                                                                     | -0.07  | 0.20    | -0.10  | 0.50             | 0.50             | a1                                 | -0.12                           | 0.50                       | 1.50                        | 0.75               | -0.05   | 1.50        | 1.50              | -0.06                                                                         | 0.75               | 1.50    | 1.50                  | 0.50    | 1.50    | 1.50                  | -0.15   | 1.50    | 1.50                  | 1.50    | 1.50     |         |         |         |         |         |         |                       |         |         |                       |         |         |                       |         |          |                        |      |      |      |      |       |      |      |      |      |      |      |      |      |      |      |      |      |      |      |      |      |      |      |      |      |                      |      |      |      |      |        |      |       |       |       |       |      |      |       |      |      |      |      |      |       |       |       |       |       |      |       |       |       |      |       |      |      |    |       |      |      |      |       |      |      |       |      |      |      |      |      |      |       |      |      |      |      |          |  |    |  |    |  |  |    |    |    |    |  |    |    |  |  |    |                  |    |    |                   |  |    |                   |    |    |           |  |       |  |       |  |  |  |       |     |       |  |       |      |      |  |      |     |       |       |      |  |      |      |       |      |  |  |  |  |  |  |  |  |       |  |    |  |  |  |  |       |  |  |  |  |  |  |  |  |  |  |
| Ion-type                                                                                                                                                                                                                                                                                                                                                                                                                                                                                                                                                                                                                                                                                                                                                                                                                                                                                                                                                                                                                                                                                                                                                                                                                                                                                                                                                                                                                                                                                                                                                                                                                                                                                                                                                                                                                                                                                                                                                                                                                                                                                                                                                                                                                                                                                                                                                                                                                                                                                                                                                                                                                                                                                                                                                                                                                                  |        | PR      |        | KQ               |                  |                                    | KQ                              | a2                         | y1                          | b2                 |         | y2          | y3                |                                                                               |                    | y4      | y8 <sup>+2</sup>      | b6      | y5      | y11 <sup>+2</sup>     |         | y6      | y13 <sup>+2</sup>     | y7      | y8       |         |         |         |         |         |         |                       |         |         |                       |         |         |                       |         |          |                        |      |      |      |      |       |      |      |      |      |      |      |      |      |      |      |      |      |      |      |      |      |      |      |      |      |                      |      |      |      |      |        |      |       |       |       |       |      |      |       |      |      |      |      |      |       |       |       |       |       |      |       |       |       |      |       |      |      |    |       |      |      |      |       |      |      |       |      |      |      |      |      |      |       |      |      |      |      |          |  |    |  |    |  |  |    |    |    |    |  |    |    |  |  |    |                  |    |    |                   |  |    |                   |    |    |           |  |       |  |       |  |  |  |       |     |       |  |       |      |      |  |      |     |       |       |      |  |      |      |       |      |  |  |  |  |  |  |  |  |       |  |    |  |  |  |  |       |  |  |  |  |  |  |  |  |  |  |
| Delta ppm                                                                                                                                                                                                                                                                                                                                                                                                                                                                                                                                                                                                                                                                                                                                                                                                                                                                                                                                                                                                                                                                                                                                                                                                                                                                                                                                                                                                                                                                                                                                                                                                                                                                                                                                                                                                                                                                                                                                                                                                                                                                                                                                                                                                                                                                                                                                                                                                                                                                                                                                                                                                                                                                                                                                                                                                                                 |        | -20.3   |        | -18.7            |                  |                                    |                                 | -29.3                      | 2.6                         | -13.0              |         | -13.3       | -6.6              | -9.2                                                                          |                    | 25.3    | 1.4                   | -33.4   | -11.9   | -8.1                  |         | -3.8    | -8.9                  | -11.0   | -4.8     |         |         |         |         |         |         |                       |         |         |                       |         |         |                       |         |          |                        |      |      |      |      |       |      |      |      |      |      |      |      |      |      |      |      |      |      |      |      |      |      |      |      |      |                      |      |      |      |      |        |      |       |       |       |       |      |      |       |      |      |      |      |      |       |       |       |       |       |      |       |       |       |      |       |      |      |    |       |      |      |      |       |      |      |       |      |      |      |      |      |      |       |      |      |      |      |          |  |    |  |    |  |  |    |    |    |    |  |    |    |  |  |    |                  |    |    |                   |  |    |                   |    |    |           |  |       |  |       |  |  |  |       |     |       |  |       |      |      |  |      |     |       |       |      |  |      |      |       |      |  |  |  |  |  |  |  |  |       |  |    |  |  |  |  |       |  |  |  |  |  |  |  |  |  |  |
|                                                                                                                                                                                                                                                                                                                                                                                                                                                                                                                                                                                                                                                                                                                                                                                                                                                                                                                                                                                                                                                                                                                                                                                                                                                                                                                                                                                                                                                                                                                                                                                                                                                                                                                                                                                                                                                                                                                                                                                                                                                                                                                                                                                                                                                                                                                                                                                                                                                                                                                                                                                                                                                                                                                                                                                                                                           |        |         |        |                  |                  |                                    |                                 | IS-28                      |                             | IS                 |         |             |                   |                                                                               | QGNIS              |         |                       |         |         |                       |         |         |                       |         |          |         |         |         |         |         |         |                       |         |         |                       |         |         |                       |         |          |                        |      |      |      |      |       |      |      |      |      |      |      |      |      |      |      |      |      |      |      |      |      |      |      |      |      |                      |      |      |      |      |        |      |       |       |       |       |      |      |       |      |      |      |      |      |       |       |       |       |       |      |       |       |       |      |       |      |      |    |       |      |      |      |       |      |      |       |      |      |      |      |      |      |       |      |      |      |      |          |  |    |  |    |  |  |    |    |    |    |  |    |    |  |  |    |                  |    |    |                   |  |    |                   |    |    |           |  |       |  |       |  |  |  |       |     |       |  |       |      |      |  |      |     |       |       |      |  |      |      |       |      |  |  |  |  |  |  |  |  |       |  |    |  |  |  |  |       |  |  |  |  |  |  |  |  |  |  |

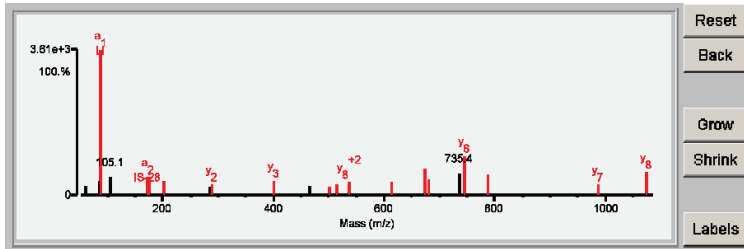

Result Summary

| Rank | Score | SPI (%) | BCS | # Unmatched Ions | Variable sites | Sequence               | MH <sup>+</sup> Calculated (Da) | MH <sup>+</sup> Error (Da) | MH <sup>+</sup> Error (ppm) | Protein MW/pi (Da) | Species | Accession #            | Protein Name                                                            |
|------|-------|---------|-----|------------------|----------------|------------------------|---------------------------------|----------------------------|-----------------------------|--------------------|---------|------------------------|-------------------------------------------------------------------------|
| 1    | 15.16 | 76.9    | 6   | 7/25             | K162k          | (K)ASPALVAKDPGTVANK(K) | 1538.8537                       | 114.0440                   | 0.6                         | 59179.9/4.70       | HUMAN   | <a href="#">Q92783</a> | Signal transducing adapter molecule 1 OS=Homo sapiens GN=STAM PE=1 SV=3 |
| 2    | 6.49  | 55.7    | 2   | 13/25            | K450k K454k    | (K)LAPPKAGSKNLNKN(K)   | 1424.8220                       | 228.0757                   | -6.2                        | 255619.3/8.92      | HUMAN   | <a href="#">Q81VL0</a> | Neuron navigator 3 OS=Homo sapiens GN=NAV3 PE=1 SV=2                    |

Detailed Results

| Rank                                                                                                                                                                                                                                                                                                                                                                                                                                                                                                                                                                                                                                                                                                                                                                                                                                                                                                                                                                                                                                                                                                                                                                                                                                                                                                                                                                                                                                                                                                                                                                                                                                                                                                                                                                                                                                                                                                                                                                                                                                                                                                                                                                                                                                                                                                                                                                                                                                                                                                                                                                                               | Score  | SPI (%) | BCS    | # Unmatched Ions | Variable sites | Sequence                               | MH <sup>+</sup> Calculated (Da) | MH <sup>+</sup> Error (Da) | MH <sup>+</sup> Error (ppm) | Protein MW/pi (Da) | Species | Accession #            | MS-Digest Index #      | Protein Name                                                            |                       |         |         |         |                       |                       |         |                   |         |         |         |         |         |                       |         |                       |         |         |         |                       |                       |         |         |         |         |         |                         |      |      |      |      |      |      |      |      |       |      |      |      |      |      |      |      |      |      |      |      |      |      |      |       |      |                       |      |      |      |      |      |       |       |       |       |       |       |       |       |       |       |       |       |       |       |       |       |       |       |        |       |       |      |      |      |      |      |      |      |      |      |       |      |      |      |       |       |       |       |       |      |      |      |      |      |      |       |          |    |   |    |    |     |        |    |       |    |  |    |     |                  |  |  |  |  |  |                   |                   |    |                   |        |    |  |           |      |     |       |     |       |      |       |      |     |  |       |     |  |  |  |  |  |  |       |      |       |       |      |      |  |
|----------------------------------------------------------------------------------------------------------------------------------------------------------------------------------------------------------------------------------------------------------------------------------------------------------------------------------------------------------------------------------------------------------------------------------------------------------------------------------------------------------------------------------------------------------------------------------------------------------------------------------------------------------------------------------------------------------------------------------------------------------------------------------------------------------------------------------------------------------------------------------------------------------------------------------------------------------------------------------------------------------------------------------------------------------------------------------------------------------------------------------------------------------------------------------------------------------------------------------------------------------------------------------------------------------------------------------------------------------------------------------------------------------------------------------------------------------------------------------------------------------------------------------------------------------------------------------------------------------------------------------------------------------------------------------------------------------------------------------------------------------------------------------------------------------------------------------------------------------------------------------------------------------------------------------------------------------------------------------------------------------------------------------------------------------------------------------------------------------------------------------------------------------------------------------------------------------------------------------------------------------------------------------------------------------------------------------------------------------------------------------------------------------------------------------------------------------------------------------------------------------------------------------------------------------------------------------------------------|--------|---------|--------|------------------|----------------|----------------------------------------|---------------------------------|----------------------------|-----------------------------|--------------------|---------|------------------------|------------------------|-------------------------------------------------------------------------|-----------------------|---------|---------|---------|-----------------------|-----------------------|---------|-------------------|---------|---------|---------|---------|---------|-----------------------|---------|-----------------------|---------|---------|---------|-----------------------|-----------------------|---------|---------|---------|---------|---------|-------------------------|------|------|------|------|------|------|------|------|-------|------|------|------|------|------|------|------|------|------|------|------|------|------|------|-------|------|-----------------------|------|------|------|------|------|-------|-------|-------|-------|-------|-------|-------|-------|-------|-------|-------|-------|-------|-------|-------|-------|-------|-------|--------|-------|-------|------|------|------|------|------|------|------|------|------|-------|------|------|------|-------|-------|-------|-------|-------|------|------|------|------|------|------|-------|----------|----|---|----|----|-----|--------|----|-------|----|--|----|-----|------------------|--|--|--|--|--|-------------------|-------------------|----|-------------------|--------|----|--|-----------|------|-----|-------|-----|-------|------|-------|------|-----|--|-------|-----|--|--|--|--|--|--|-------|------|-------|-------|------|------|--|
| 1                                                                                                                                                                                                                                                                                                                                                                                                                                                                                                                                                                                                                                                                                                                                                                                                                                                                                                                                                                                                                                                                                                                                                                                                                                                                                                                                                                                                                                                                                                                                                                                                                                                                                                                                                                                                                                                                                                                                                                                                                                                                                                                                                                                                                                                                                                                                                                                                                                                                                                                                                                                                  | 15.16  | 76.9    | 6      | 7/25             | K162k          | (K)A S/P A/L V/A K D/P/G T V A/N K (K) | 1538.8537                       | 114.0440                   | 0.6                         | 59179.9/4.70       | HUMAN   | <a href="#">Q92783</a> | <a href="#">736311</a> | Signal transducing adapter molecule 1 OS=Homo sapiens GN=STAM PE=1 SV=3 |                       |         |         |         |                       |                       |         |                   |         |         |         |         |         |                       |         |                       |         |         |         |                       |                       |         |         |         |         |         |                         |      |      |      |      |      |      |      |      |       |      |      |      |      |      |      |      |      |      |      |      |      |      |      |       |      |                       |      |      |      |      |      |       |       |       |       |       |       |       |       |       |       |       |       |       |       |       |       |       |       |        |       |       |      |      |      |      |      |      |      |      |      |       |      |      |      |       |       |       |       |       |      |      |      |      |      |      |       |          |    |   |    |    |     |        |    |       |    |  |    |     |                  |  |  |  |  |  |                   |                   |    |                   |        |    |  |           |      |     |       |     |       |      |       |      |     |  |       |     |  |  |  |  |  |  |       |      |       |       |      |      |  |
| <table border="1"> <thead> <tr> <th>Fragment-ion (m/z)</th> <th>70.065</th> <th>72.081</th> <th>84.080</th> <th>86.097</th> <th>129.098</th> <th>130.086</th> <th>131.079</th> <th>141.103</th> <th>169.099</th> <th>170.098</th> <th>261.147</th> <th>282.184</th> <th>343.692<sup>+2</sup></th> <th>353.131</th> <th>377.214<sup>+2</sup></th> <th>424.231</th> <th>451.242</th> <th>469.326</th> <th>498.928<sup>+3</sup></th> <th>557.796<sup>+2</sup></th> <th>589.321</th> <th>663.851</th> <th>668.373</th> <th>686.379</th> <th>809.462</th> </tr> </thead> <tbody> <tr> <td>Frac. Inten. (% of TIC)</td> <td>0.02</td> <td>0.20</td> <td>0.32</td> <td>0.19</td> <td>0.09</td> <td>4.80</td> <td>2.91</td> <td>6.06</td> <td>11.26</td> <td>3.14</td> <td>4.19</td> <td>4.31</td> <td>6.57</td> <td>3.14</td> <td>3.32</td> <td>4.17</td> <td>2.69</td> <td>2.85</td> <td>6.51</td> <td>4.79</td> <td>2.95</td> <td>3.19</td> <td>2.72</td> <td>15.80</td> <td>3.80</td> </tr> <tr> <td>Rel. Inten. (% of BP)</td> <td>0.10</td> <td>1.25</td> <td>2.04</td> <td>1.23</td> <td>0.59</td> <td>30.38</td> <td>18.43</td> <td>38.33</td> <td>71.27</td> <td>19.89</td> <td>26.50</td> <td>27.30</td> <td>41.57</td> <td>19.89</td> <td>21.02</td> <td>26.41</td> <td>17.05</td> <td>18.03</td> <td>41.22</td> <td>30.29</td> <td>18.67</td> <td>20.17</td> <td>17.23</td> <td>100.00</td> <td>24.06</td> </tr> <tr> <td>Score</td> <td>0.20</td> <td>0.50</td> <td>0.50</td> <td>0.22</td> <td>0.20</td> <td>0.50</td> <td>1.50</td> <td>0.50</td> <td>0.75</td> <td>-0.20</td> <td>1.50</td> <td>0.75</td> <td>1.50</td> <td>-0.20</td> <td>-0.21</td> <td>-0.26</td> <td>-0.17</td> <td>-0.18</td> <td>1.50</td> <td>1.50</td> <td>1.50</td> <td>1.50</td> <td>0.50</td> <td>1.50</td> <td>-0.24</td> </tr> <tr> <td>Ion-type</td> <td>PR</td> <td>V</td> <td>KQ</td> <td>LI</td> <td>RKQ</td> <td>y1-NH3</td> <td>a2</td> <td>PA-28</td> <td>PA</td> <td></td> <td>y2</td> <td>PAL</td> <td>y7<sup>+2</sup></td> <td></td> <td></td> <td></td> <td></td> <td></td> <td>y14<sup>+3</sup></td> <td>y10<sup>+2</sup></td> <td>y6</td> <td>y<sup>++12</sup></td> <td>y7-H2O</td> <td>y7</td> <td></td> </tr> <tr> <td>Delta ppm</td> <td>-4.6</td> <td>0.3</td> <td>-12.8</td> <td>3.2</td> <td>-35.9</td> <td>-4.3</td> <td>-29.0</td> <td>-1.7</td> <td>1.5</td> <td></td> <td>-34.2</td> <td>6.3</td> <td></td> <td></td> <td></td> <td></td> <td></td> <td></td> <td>-38.4</td> <td>-0.9</td> <td>-15.8</td> <td>-31.7</td> <td>-0.0</td> <td>-6.2</td> <td></td> </tr> </tbody> </table> |        |         |        |                  |                |                                        |                                 |                            |                             |                    |         |                        |                        |                                                                         | Fragment-ion (m/z)    | 70.065  | 72.081  | 84.080  | 86.097                | 129.098               | 130.086 | 131.079           | 141.103 | 169.099 | 170.098 | 261.147 | 282.184 | 343.692 <sup>+2</sup> | 353.131 | 377.214 <sup>+2</sup> | 424.231 | 451.242 | 469.326 | 498.928 <sup>+3</sup> | 557.796 <sup>+2</sup> | 589.321 | 663.851 | 668.373 | 686.379 | 809.462 | Frac. Inten. (% of TIC) | 0.02 | 0.20 | 0.32 | 0.19 | 0.09 | 4.80 | 2.91 | 6.06 | 11.26 | 3.14 | 4.19 | 4.31 | 6.57 | 3.14 | 3.32 | 4.17 | 2.69 | 2.85 | 6.51 | 4.79 | 2.95 | 3.19 | 2.72 | 15.80 | 3.80 | Rel. Inten. (% of BP) | 0.10 | 1.25 | 2.04 | 1.23 | 0.59 | 30.38 | 18.43 | 38.33 | 71.27 | 19.89 | 26.50 | 27.30 | 41.57 | 19.89 | 21.02 | 26.41 | 17.05 | 18.03 | 41.22 | 30.29 | 18.67 | 20.17 | 17.23 | 100.00 | 24.06 | Score | 0.20 | 0.50 | 0.50 | 0.22 | 0.20 | 0.50 | 1.50 | 0.50 | 0.75 | -0.20 | 1.50 | 0.75 | 1.50 | -0.20 | -0.21 | -0.26 | -0.17 | -0.18 | 1.50 | 1.50 | 1.50 | 1.50 | 0.50 | 1.50 | -0.24 | Ion-type | PR | V | KQ | LI | RKQ | y1-NH3 | a2 | PA-28 | PA |  | y2 | PAL | y7 <sup>+2</sup> |  |  |  |  |  | y14 <sup>+3</sup> | y10 <sup>+2</sup> | y6 | y <sup>++12</sup> | y7-H2O | y7 |  | Delta ppm | -4.6 | 0.3 | -12.8 | 3.2 | -35.9 | -4.3 | -29.0 | -1.7 | 1.5 |  | -34.2 | 6.3 |  |  |  |  |  |  | -38.4 | -0.9 | -15.8 | -31.7 | -0.0 | -6.2 |  |
| Fragment-ion (m/z)                                                                                                                                                                                                                                                                                                                                                                                                                                                                                                                                                                                                                                                                                                                                                                                                                                                                                                                                                                                                                                                                                                                                                                                                                                                                                                                                                                                                                                                                                                                                                                                                                                                                                                                                                                                                                                                                                                                                                                                                                                                                                                                                                                                                                                                                                                                                                                                                                                                                                                                                                                                 | 70.065 | 72.081  | 84.080 | 86.097           | 129.098        | 130.086                                | 131.079                         | 141.103                    | 169.099                     | 170.098            | 261.147 | 282.184                | 343.692 <sup>+2</sup>  | 353.131                                                                 | 377.214 <sup>+2</sup> | 424.231 | 451.242 | 469.326 | 498.928 <sup>+3</sup> | 557.796 <sup>+2</sup> | 589.321 | 663.851           | 668.373 | 686.379 | 809.462 |         |         |                       |         |                       |         |         |         |                       |                       |         |         |         |         |         |                         |      |      |      |      |      |      |      |      |       |      |      |      |      |      |      |      |      |      |      |      |      |      |      |       |      |                       |      |      |      |      |      |       |       |       |       |       |       |       |       |       |       |       |       |       |       |       |       |       |       |        |       |       |      |      |      |      |      |      |      |      |      |       |      |      |      |       |       |       |       |       |      |      |      |      |      |      |       |          |    |   |    |    |     |        |    |       |    |  |    |     |                  |  |  |  |  |  |                   |                   |    |                   |        |    |  |           |      |     |       |     |       |      |       |      |     |  |       |     |  |  |  |  |  |  |       |      |       |       |      |      |  |
| Frac. Inten. (% of TIC)                                                                                                                                                                                                                                                                                                                                                                                                                                                                                                                                                                                                                                                                                                                                                                                                                                                                                                                                                                                                                                                                                                                                                                                                                                                                                                                                                                                                                                                                                                                                                                                                                                                                                                                                                                                                                                                                                                                                                                                                                                                                                                                                                                                                                                                                                                                                                                                                                                                                                                                                                                            | 0.02   | 0.20    | 0.32   | 0.19             | 0.09           | 4.80                                   | 2.91                            | 6.06                       | 11.26                       | 3.14               | 4.19    | 4.31                   | 6.57                   | 3.14                                                                    | 3.32                  | 4.17    | 2.69    | 2.85    | 6.51                  | 4.79                  | 2.95    | 3.19              | 2.72    | 15.80   | 3.80    |         |         |                       |         |                       |         |         |         |                       |                       |         |         |         |         |         |                         |      |      |      |      |      |      |      |      |       |      |      |      |      |      |      |      |      |      |      |      |      |      |      |       |      |                       |      |      |      |      |      |       |       |       |       |       |       |       |       |       |       |       |       |       |       |       |       |       |       |        |       |       |      |      |      |      |      |      |      |      |      |       |      |      |      |       |       |       |       |       |      |      |      |      |      |      |       |          |    |   |    |    |     |        |    |       |    |  |    |     |                  |  |  |  |  |  |                   |                   |    |                   |        |    |  |           |      |     |       |     |       |      |       |      |     |  |       |     |  |  |  |  |  |  |       |      |       |       |      |      |  |
| Rel. Inten. (% of BP)                                                                                                                                                                                                                                                                                                                                                                                                                                                                                                                                                                                                                                                                                                                                                                                                                                                                                                                                                                                                                                                                                                                                                                                                                                                                                                                                                                                                                                                                                                                                                                                                                                                                                                                                                                                                                                                                                                                                                                                                                                                                                                                                                                                                                                                                                                                                                                                                                                                                                                                                                                              | 0.10   | 1.25    | 2.04   | 1.23             | 0.59           | 30.38                                  | 18.43                           | 38.33                      | 71.27                       | 19.89              | 26.50   | 27.30                  | 41.57                  | 19.89                                                                   | 21.02                 | 26.41   | 17.05   | 18.03   | 41.22                 | 30.29                 | 18.67   | 20.17             | 17.23   | 100.00  | 24.06   |         |         |                       |         |                       |         |         |         |                       |                       |         |         |         |         |         |                         |      |      |      |      |      |      |      |      |       |      |      |      |      |      |      |      |      |      |      |      |      |      |      |       |      |                       |      |      |      |      |      |       |       |       |       |       |       |       |       |       |       |       |       |       |       |       |       |       |       |        |       |       |      |      |      |      |      |      |      |      |      |       |      |      |      |       |       |       |       |       |      |      |      |      |      |      |       |          |    |   |    |    |     |        |    |       |    |  |    |     |                  |  |  |  |  |  |                   |                   |    |                   |        |    |  |           |      |     |       |     |       |      |       |      |     |  |       |     |  |  |  |  |  |  |       |      |       |       |      |      |  |
| Score                                                                                                                                                                                                                                                                                                                                                                                                                                                                                                                                                                                                                                                                                                                                                                                                                                                                                                                                                                                                                                                                                                                                                                                                                                                                                                                                                                                                                                                                                                                                                                                                                                                                                                                                                                                                                                                                                                                                                                                                                                                                                                                                                                                                                                                                                                                                                                                                                                                                                                                                                                                              | 0.20   | 0.50    | 0.50   | 0.22             | 0.20           | 0.50                                   | 1.50                            | 0.50                       | 0.75                        | -0.20              | 1.50    | 0.75                   | 1.50                   | -0.20                                                                   | -0.21                 | -0.26   | -0.17   | -0.18   | 1.50                  | 1.50                  | 1.50    | 1.50              | 0.50    | 1.50    | -0.24   |         |         |                       |         |                       |         |         |         |                       |                       |         |         |         |         |         |                         |      |      |      |      |      |      |      |      |       |      |      |      |      |      |      |      |      |      |      |      |      |      |      |       |      |                       |      |      |      |      |      |       |       |       |       |       |       |       |       |       |       |       |       |       |       |       |       |       |       |        |       |       |      |      |      |      |      |      |      |      |      |       |      |      |      |       |       |       |       |       |      |      |      |      |      |      |       |          |    |   |    |    |     |        |    |       |    |  |    |     |                  |  |  |  |  |  |                   |                   |    |                   |        |    |  |           |      |     |       |     |       |      |       |      |     |  |       |     |  |  |  |  |  |  |       |      |       |       |      |      |  |
| Ion-type                                                                                                                                                                                                                                                                                                                                                                                                                                                                                                                                                                                                                                                                                                                                                                                                                                                                                                                                                                                                                                                                                                                                                                                                                                                                                                                                                                                                                                                                                                                                                                                                                                                                                                                                                                                                                                                                                                                                                                                                                                                                                                                                                                                                                                                                                                                                                                                                                                                                                                                                                                                           | PR     | V       | KQ     | LI               | RKQ            | y1-NH3                                 | a2                              | PA-28                      | PA                          |                    | y2      | PAL                    | y7 <sup>+2</sup>       |                                                                         |                       |         |         |         | y14 <sup>+3</sup>     | y10 <sup>+2</sup>     | y6      | y <sup>++12</sup> | y7-H2O  | y7      |         |         |         |                       |         |                       |         |         |         |                       |                       |         |         |         |         |         |                         |      |      |      |      |      |      |      |      |       |      |      |      |      |      |      |      |      |      |      |      |      |      |      |       |      |                       |      |      |      |      |      |       |       |       |       |       |       |       |       |       |       |       |       |       |       |       |       |       |       |        |       |       |      |      |      |      |      |      |      |      |      |       |      |      |      |       |       |       |       |       |      |      |      |      |      |      |       |          |    |   |    |    |     |        |    |       |    |  |    |     |                  |  |  |  |  |  |                   |                   |    |                   |        |    |  |           |      |     |       |     |       |      |       |      |     |  |       |     |  |  |  |  |  |  |       |      |       |       |      |      |  |
| Delta ppm                                                                                                                                                                                                                                                                                                                                                                                                                                                                                                                                                                                                                                                                                                                                                                                                                                                                                                                                                                                                                                                                                                                                                                                                                                                                                                                                                                                                                                                                                                                                                                                                                                                                                                                                                                                                                                                                                                                                                                                                                                                                                                                                                                                                                                                                                                                                                                                                                                                                                                                                                                                          | -4.6   | 0.3     | -12.8  | 3.2              | -35.9          | -4.3                                   | -29.0                           | -1.7                       | 1.5                         |                    | -34.2   | 6.3                    |                        |                                                                         |                       |         |         |         | -38.4                 | -0.9                  | -15.8   | -31.7             | -0.0    | -6.2    |         |         |         |                       |         |                       |         |         |         |                       |                       |         |         |         |         |         |                         |      |      |      |      |      |      |      |      |       |      |      |      |      |      |      |      |      |      |      |      |      |      |      |       |      |                       |      |      |      |      |      |       |       |       |       |       |       |       |       |       |       |       |       |       |       |       |       |       |       |        |       |       |      |      |      |      |      |      |      |      |      |       |      |      |      |       |       |       |       |       |      |      |      |      |      |      |       |          |    |   |    |    |     |        |    |       |    |  |    |     |                  |  |  |  |  |  |                   |                   |    |                   |        |    |  |           |      |     |       |     |       |      |       |      |     |  |       |     |  |  |  |  |  |  |       |      |       |       |      |      |  |

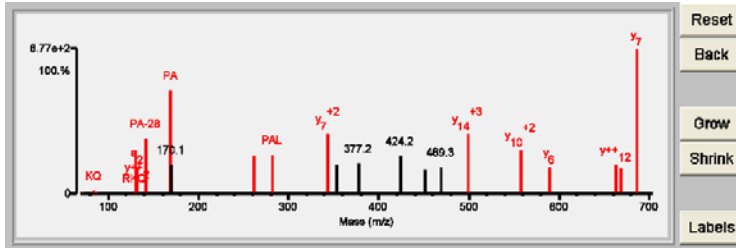

Result Summary

| Rank | Score | SPI (%) | BCS | # Unmatched Ions | Variable sites | Sequence                   | MH <sup>+</sup> Calculated (Da) | MH <sup>+</sup> Error (Da) | MH <sup>+</sup> Error (ppm) | Protein MW/pI (Da) | Species | Accession # | Protein Name                                                                          |
|------|-------|---------|-----|------------------|----------------|----------------------------|---------------------------------|----------------------------|-----------------------------|--------------------|---------|-------------|---------------------------------------------------------------------------------------|
| 1    | 19.59 | 87.7    | 11  | 3/25             | K81k           | (R)SGDSEVYQLGDVQSQTTHRR(I) | 2293.0844                       | 114.0630                   | 8.3                         | 17259.8/9.59       | HUMAN   | Q04837      | Single-stranded DNA-binding protein, mitochondrial OS=Homo sapiens GN=SSBP1 PE=1 SV=1 |

Detailed Results

| Rank                                                                                                                                                                                                                                                                                                                                                                                                                                                                                                                                                                                                                                                                                                                                                                                                                                                                                                                                                                                                                                                                                                                                                                                                                                                                                                                                                                                                                                                                                                                                                                                                                                                                                                                                                                                                                                                                                                                                                                                                                                                                                                                                                                                                                                                                                                                                                                                                                                                                                                                                                                                                                                                         | Score  | SPI (%) | BCS    | # Unmatched Ions | Variable sites | Sequence                   | MH <sup>+</sup> Calculated (Da) | MH <sup>+</sup> Error (Da) | MH <sup>+</sup> Error (ppm) | Protein MW/pI (Da) | Species | Accession # | MS-Digest Index #     | Protein Name                                                                          |                    |         |         |                       |                       |         |                       |                       |                       |                       |         |         |         |                       |         |         |         |         |                       |                       |         |                       |                       |                       |                       |         |                         |      |      |      |      |      |      |      |      |      |      |      |      |      |      |      |      |      |      |      |      |       |      |      |      |      |                       |       |      |      |      |      |      |       |      |       |       |       |       |       |       |       |       |       |       |       |       |        |       |       |       |       |       |      |      |      |      |      |      |      |      |      |      |      |      |      |      |      |      |      |      |      |      |      |      |      |      |      |          |    |   |   |    |    |    |    |    |    |   |   |    |    |    |    |        |    |                  |                  |    |                   |                   |                   |    |    |           |      |      |     |      |       |       |      |  |       |      |       |  |      |      |      |      |     |       |     |     |      |  |  |      |      |
|--------------------------------------------------------------------------------------------------------------------------------------------------------------------------------------------------------------------------------------------------------------------------------------------------------------------------------------------------------------------------------------------------------------------------------------------------------------------------------------------------------------------------------------------------------------------------------------------------------------------------------------------------------------------------------------------------------------------------------------------------------------------------------------------------------------------------------------------------------------------------------------------------------------------------------------------------------------------------------------------------------------------------------------------------------------------------------------------------------------------------------------------------------------------------------------------------------------------------------------------------------------------------------------------------------------------------------------------------------------------------------------------------------------------------------------------------------------------------------------------------------------------------------------------------------------------------------------------------------------------------------------------------------------------------------------------------------------------------------------------------------------------------------------------------------------------------------------------------------------------------------------------------------------------------------------------------------------------------------------------------------------------------------------------------------------------------------------------------------------------------------------------------------------------------------------------------------------------------------------------------------------------------------------------------------------------------------------------------------------------------------------------------------------------------------------------------------------------------------------------------------------------------------------------------------------------------------------------------------------------------------------------------------------|--------|---------|--------|------------------|----------------|----------------------------|---------------------------------|----------------------------|-----------------------------|--------------------|---------|-------------|-----------------------|---------------------------------------------------------------------------------------|--------------------|---------|---------|-----------------------|-----------------------|---------|-----------------------|-----------------------|-----------------------|-----------------------|---------|---------|---------|-----------------------|---------|---------|---------|---------|-----------------------|-----------------------|---------|-----------------------|-----------------------|-----------------------|-----------------------|---------|-------------------------|------|------|------|------|------|------|------|------|------|------|------|------|------|------|------|------|------|------|------|------|-------|------|------|------|------|-----------------------|-------|------|------|------|------|------|-------|------|-------|-------|-------|-------|-------|-------|-------|-------|-------|-------|-------|-------|--------|-------|-------|-------|-------|-------|------|------|------|------|------|------|------|------|------|------|------|------|------|------|------|------|------|------|------|------|------|------|------|------|------|----------|----|---|---|----|----|----|----|----|----|---|---|----|----|----|----|--------|----|------------------|------------------|----|-------------------|-------------------|-------------------|----|----|-----------|------|------|-----|------|-------|-------|------|--|-------|------|-------|--|------|------|------|------|-----|-------|-----|-----|------|--|--|------|------|
| 1                                                                                                                                                                                                                                                                                                                                                                                                                                                                                                                                                                                                                                                                                                                                                                                                                                                                                                                                                                                                                                                                                                                                                                                                                                                                                                                                                                                                                                                                                                                                                                                                                                                                                                                                                                                                                                                                                                                                                                                                                                                                                                                                                                                                                                                                                                                                                                                                                                                                                                                                                                                                                                                            | 19.59  | 87.7    | 11     | 3/25             | K81k           | (R)SGDSEVYQLGDVQSQTTHRR(I) | 2293.0844                       | 114.0630                   | 8.3                         | 17259.8/9.59       | HUMAN   | Q04837      | 732779                | Single-stranded DNA-binding protein, mitochondrial OS=Homo sapiens GN=SSBP1 PE=1 SV=1 |                    |         |         |                       |                       |         |                       |                       |                       |                       |         |         |         |                       |         |         |         |         |                       |                       |         |                       |                       |                       |                       |         |                         |      |      |      |      |      |      |      |      |      |      |      |      |      |      |      |      |      |      |      |      |       |      |      |      |      |                       |       |      |      |      |      |      |       |      |       |       |       |       |       |       |       |       |       |       |       |       |        |       |       |       |       |       |      |      |      |      |      |      |      |      |      |      |      |      |      |      |      |      |      |      |      |      |      |      |      |      |      |          |    |   |   |    |    |    |    |    |    |   |   |    |    |    |    |        |    |                  |                  |    |                   |                   |                   |    |    |           |      |      |     |      |       |       |      |  |       |      |       |  |      |      |      |      |     |       |     |     |      |  |  |      |      |
| <table border="1"> <thead> <tr> <th>Fragment-ion (m/z)</th> <th>60.045</th> <th>72.081</th> <th>84.045</th> <th>84.079</th> <th>86.096</th> <th>101.068</th> <th>117.063</th> <th>136.075</th> <th>175.111</th> <th>217.080</th> <th>312.176</th> <th>324.138</th> <th>467.234<sup>+2</sup></th> <th>476.160</th> <th>498.255</th> <th>557.218</th> <th>575.238</th> <th>579.298<sup>+2</sup></th> <th>628.819<sup>+2</sup></th> <th>700.356</th> <th>714.856<sup>+2</sup></th> <th>771.423<sup>+2</sup></th> <th>827.398<sup>+2</sup></th> <th>835.422<sup>+2</sup></th> <th>942.490</th> </tr> </thead> <tbody> <tr> <td>Frac. Inten. (% of TIC)</td> <td>6.27</td> <td>0.47</td> <td>0.09</td> <td>0.12</td> <td>0.46</td> <td>0.16</td> <td>2.85</td> <td>0.40</td> <td>5.07</td> <td>3.23</td> <td>5.23</td> <td>2.88</td> <td>2.93</td> <td>3.39</td> <td>3.28</td> <td>4.27</td> <td>4.24</td> <td>7.60</td> <td>5.28</td> <td>6.43</td> <td>13.93</td> <td>9.46</td> <td>4.26</td> <td>4.62</td> <td>3.09</td> </tr> <tr> <td>Rel. Inten. (% of BP)</td> <td>45.03</td> <td>3.39</td> <td>0.64</td> <td>0.83</td> <td>3.34</td> <td>1.13</td> <td>20.47</td> <td>2.90</td> <td>36.39</td> <td>23.17</td> <td>37.53</td> <td>20.65</td> <td>21.03</td> <td>24.36</td> <td>23.59</td> <td>30.64</td> <td>30.46</td> <td>54.58</td> <td>37.90</td> <td>46.14</td> <td>100.00</td> <td>67.94</td> <td>30.60</td> <td>33.18</td> <td>22.22</td> </tr> <tr> <td>Score</td> <td>0.50</td> <td>0.50</td> <td>1.00</td> <td>0.22</td> <td>0.50</td> <td>0.50</td> <td>1.00</td> <td>1.00</td> <td>0.75</td> <td>1.50</td> <td>0.75</td> <td>1.50</td> <td>0.50</td> <td>1.50</td> <td>1.50</td> <td>0.25</td> <td>0.50</td> <td>1.50</td> <td>1.50</td> <td>1.50</td> <td>1.50</td> <td>1.50</td> <td>1.50</td> <td>1.50</td> <td>1.50</td> </tr> <tr> <td>Ion-type</td> <td>a1</td> <td>V</td> <td>E</td> <td>QK</td> <td>LI</td> <td>QK</td> <td>QK</td> <td>QK</td> <td>SE</td> <td>Y</td> <td>Y</td> <td>WH</td> <td>WH</td> <td>b5</td> <td>y3</td> <td>b6-H2O</td> <td>b6</td> <td>y8<sup>+2</sup></td> <td>y9<sup>+2</sup></td> <td>y5</td> <td>y11<sup>+2</sup></td> <td>y12<sup>+2</sup></td> <td>y13<sup>+2</sup></td> <td>y6</td> <td>y6</td> </tr> <tr> <td>Delta ppm</td> <td>-8.1</td> <td>-1.0</td> <td>4.9</td> <td>-1.5</td> <td>-25.1</td> <td>-30.3</td> <td>-2.1</td> <td></td> <td>-15.2</td> <td>-5.7</td> <td>-26.2</td> <td></td> <td>-6.6</td> <td>-4.0</td> <td>-6.1</td> <td>10.4</td> <td>7.5</td> <td>-15.1</td> <td>5.4</td> <td>5.2</td> <td>36.6</td> <td></td> <td></td> <td>-1.8</td> <td>-0.9</td> </tr> </tbody> </table> |        |         |        |                  |                |                            |                                 |                            |                             |                    |         |             |                       |                                                                                       | Fragment-ion (m/z) | 60.045  | 72.081  | 84.045                | 84.079                | 86.096  | 101.068               | 117.063               | 136.075               | 175.111               | 217.080 | 312.176 | 324.138 | 467.234 <sup>+2</sup> | 476.160 | 498.255 | 557.218 | 575.238 | 579.298 <sup>+2</sup> | 628.819 <sup>+2</sup> | 700.356 | 714.856 <sup>+2</sup> | 771.423 <sup>+2</sup> | 827.398 <sup>+2</sup> | 835.422 <sup>+2</sup> | 942.490 | Frac. Inten. (% of TIC) | 6.27 | 0.47 | 0.09 | 0.12 | 0.46 | 0.16 | 2.85 | 0.40 | 5.07 | 3.23 | 5.23 | 2.88 | 2.93 | 3.39 | 3.28 | 4.27 | 4.24 | 7.60 | 5.28 | 6.43 | 13.93 | 9.46 | 4.26 | 4.62 | 3.09 | Rel. Inten. (% of BP) | 45.03 | 3.39 | 0.64 | 0.83 | 3.34 | 1.13 | 20.47 | 2.90 | 36.39 | 23.17 | 37.53 | 20.65 | 21.03 | 24.36 | 23.59 | 30.64 | 30.46 | 54.58 | 37.90 | 46.14 | 100.00 | 67.94 | 30.60 | 33.18 | 22.22 | Score | 0.50 | 0.50 | 1.00 | 0.22 | 0.50 | 0.50 | 1.00 | 1.00 | 0.75 | 1.50 | 0.75 | 1.50 | 0.50 | 1.50 | 1.50 | 0.25 | 0.50 | 1.50 | 1.50 | 1.50 | 1.50 | 1.50 | 1.50 | 1.50 | 1.50 | Ion-type | a1 | V | E | QK | LI | QK | QK | QK | SE | Y | Y | WH | WH | b5 | y3 | b6-H2O | b6 | y8 <sup>+2</sup> | y9 <sup>+2</sup> | y5 | y11 <sup>+2</sup> | y12 <sup>+2</sup> | y13 <sup>+2</sup> | y6 | y6 | Delta ppm | -8.1 | -1.0 | 4.9 | -1.5 | -25.1 | -30.3 | -2.1 |  | -15.2 | -5.7 | -26.2 |  | -6.6 | -4.0 | -6.1 | 10.4 | 7.5 | -15.1 | 5.4 | 5.2 | 36.6 |  |  | -1.8 | -0.9 |
| Fragment-ion (m/z)                                                                                                                                                                                                                                                                                                                                                                                                                                                                                                                                                                                                                                                                                                                                                                                                                                                                                                                                                                                                                                                                                                                                                                                                                                                                                                                                                                                                                                                                                                                                                                                                                                                                                                                                                                                                                                                                                                                                                                                                                                                                                                                                                                                                                                                                                                                                                                                                                                                                                                                                                                                                                                           | 60.045 | 72.081  | 84.045 | 84.079           | 86.096         | 101.068                    | 117.063                         | 136.075                    | 175.111                     | 217.080            | 312.176 | 324.138     | 467.234 <sup>+2</sup> | 476.160                                                                               | 498.255            | 557.218 | 575.238 | 579.298 <sup>+2</sup> | 628.819 <sup>+2</sup> | 700.356 | 714.856 <sup>+2</sup> | 771.423 <sup>+2</sup> | 827.398 <sup>+2</sup> | 835.422 <sup>+2</sup> | 942.490 |         |         |                       |         |         |         |         |                       |                       |         |                       |                       |                       |                       |         |                         |      |      |      |      |      |      |      |      |      |      |      |      |      |      |      |      |      |      |      |      |       |      |      |      |      |                       |       |      |      |      |      |      |       |      |       |       |       |       |       |       |       |       |       |       |       |       |        |       |       |       |       |       |      |      |      |      |      |      |      |      |      |      |      |      |      |      |      |      |      |      |      |      |      |      |      |      |      |          |    |   |   |    |    |    |    |    |    |   |   |    |    |    |    |        |    |                  |                  |    |                   |                   |                   |    |    |           |      |      |     |      |       |       |      |  |       |      |       |  |      |      |      |      |     |       |     |     |      |  |  |      |      |
| Frac. Inten. (% of TIC)                                                                                                                                                                                                                                                                                                                                                                                                                                                                                                                                                                                                                                                                                                                                                                                                                                                                                                                                                                                                                                                                                                                                                                                                                                                                                                                                                                                                                                                                                                                                                                                                                                                                                                                                                                                                                                                                                                                                                                                                                                                                                                                                                                                                                                                                                                                                                                                                                                                                                                                                                                                                                                      | 6.27   | 0.47    | 0.09   | 0.12             | 0.46           | 0.16                       | 2.85                            | 0.40                       | 5.07                        | 3.23               | 5.23    | 2.88        | 2.93                  | 3.39                                                                                  | 3.28               | 4.27    | 4.24    | 7.60                  | 5.28                  | 6.43    | 13.93                 | 9.46                  | 4.26                  | 4.62                  | 3.09    |         |         |                       |         |         |         |         |                       |                       |         |                       |                       |                       |                       |         |                         |      |      |      |      |      |      |      |      |      |      |      |      |      |      |      |      |      |      |      |      |       |      |      |      |      |                       |       |      |      |      |      |      |       |      |       |       |       |       |       |       |       |       |       |       |       |       |        |       |       |       |       |       |      |      |      |      |      |      |      |      |      |      |      |      |      |      |      |      |      |      |      |      |      |      |      |      |      |          |    |   |   |    |    |    |    |    |    |   |   |    |    |    |    |        |    |                  |                  |    |                   |                   |                   |    |    |           |      |      |     |      |       |       |      |  |       |      |       |  |      |      |      |      |     |       |     |     |      |  |  |      |      |
| Rel. Inten. (% of BP)                                                                                                                                                                                                                                                                                                                                                                                                                                                                                                                                                                                                                                                                                                                                                                                                                                                                                                                                                                                                                                                                                                                                                                                                                                                                                                                                                                                                                                                                                                                                                                                                                                                                                                                                                                                                                                                                                                                                                                                                                                                                                                                                                                                                                                                                                                                                                                                                                                                                                                                                                                                                                                        | 45.03  | 3.39    | 0.64   | 0.83             | 3.34           | 1.13                       | 20.47                           | 2.90                       | 36.39                       | 23.17              | 37.53   | 20.65       | 21.03                 | 24.36                                                                                 | 23.59              | 30.64   | 30.46   | 54.58                 | 37.90                 | 46.14   | 100.00                | 67.94                 | 30.60                 | 33.18                 | 22.22   |         |         |                       |         |         |         |         |                       |                       |         |                       |                       |                       |                       |         |                         |      |      |      |      |      |      |      |      |      |      |      |      |      |      |      |      |      |      |      |      |       |      |      |      |      |                       |       |      |      |      |      |      |       |      |       |       |       |       |       |       |       |       |       |       |       |       |        |       |       |       |       |       |      |      |      |      |      |      |      |      |      |      |      |      |      |      |      |      |      |      |      |      |      |      |      |      |      |          |    |   |   |    |    |    |    |    |    |   |   |    |    |    |    |        |    |                  |                  |    |                   |                   |                   |    |    |           |      |      |     |      |       |       |      |  |       |      |       |  |      |      |      |      |     |       |     |     |      |  |  |      |      |
| Score                                                                                                                                                                                                                                                                                                                                                                                                                                                                                                                                                                                                                                                                                                                                                                                                                                                                                                                                                                                                                                                                                                                                                                                                                                                                                                                                                                                                                                                                                                                                                                                                                                                                                                                                                                                                                                                                                                                                                                                                                                                                                                                                                                                                                                                                                                                                                                                                                                                                                                                                                                                                                                                        | 0.50   | 0.50    | 1.00   | 0.22             | 0.50           | 0.50                       | 1.00                            | 1.00                       | 0.75                        | 1.50               | 0.75    | 1.50        | 0.50                  | 1.50                                                                                  | 1.50               | 0.25    | 0.50    | 1.50                  | 1.50                  | 1.50    | 1.50                  | 1.50                  | 1.50                  | 1.50                  | 1.50    |         |         |                       |         |         |         |         |                       |                       |         |                       |                       |                       |                       |         |                         |      |      |      |      |      |      |      |      |      |      |      |      |      |      |      |      |      |      |      |      |       |      |      |      |      |                       |       |      |      |      |      |      |       |      |       |       |       |       |       |       |       |       |       |       |       |       |        |       |       |       |       |       |      |      |      |      |      |      |      |      |      |      |      |      |      |      |      |      |      |      |      |      |      |      |      |      |      |          |    |   |   |    |    |    |    |    |    |   |   |    |    |    |    |        |    |                  |                  |    |                   |                   |                   |    |    |           |      |      |     |      |       |       |      |  |       |      |       |  |      |      |      |      |     |       |     |     |      |  |  |      |      |
| Ion-type                                                                                                                                                                                                                                                                                                                                                                                                                                                                                                                                                                                                                                                                                                                                                                                                                                                                                                                                                                                                                                                                                                                                                                                                                                                                                                                                                                                                                                                                                                                                                                                                                                                                                                                                                                                                                                                                                                                                                                                                                                                                                                                                                                                                                                                                                                                                                                                                                                                                                                                                                                                                                                                     | a1     | V       | E      | QK               | LI             | QK                         | QK                              | QK                         | SE                          | Y                  | Y       | WH          | WH                    | b5                                                                                    | y3                 | b6-H2O  | b6      | y8 <sup>+2</sup>      | y9 <sup>+2</sup>      | y5      | y11 <sup>+2</sup>     | y12 <sup>+2</sup>     | y13 <sup>+2</sup>     | y6                    | y6      |         |         |                       |         |         |         |         |                       |                       |         |                       |                       |                       |                       |         |                         |      |      |      |      |      |      |      |      |      |      |      |      |      |      |      |      |      |      |      |      |       |      |      |      |      |                       |       |      |      |      |      |      |       |      |       |       |       |       |       |       |       |       |       |       |       |       |        |       |       |       |       |       |      |      |      |      |      |      |      |      |      |      |      |      |      |      |      |      |      |      |      |      |      |      |      |      |      |          |    |   |   |    |    |    |    |    |    |   |   |    |    |    |    |        |    |                  |                  |    |                   |                   |                   |    |    |           |      |      |     |      |       |       |      |  |       |      |       |  |      |      |      |      |     |       |     |     |      |  |  |      |      |
| Delta ppm                                                                                                                                                                                                                                                                                                                                                                                                                                                                                                                                                                                                                                                                                                                                                                                                                                                                                                                                                                                                                                                                                                                                                                                                                                                                                                                                                                                                                                                                                                                                                                                                                                                                                                                                                                                                                                                                                                                                                                                                                                                                                                                                                                                                                                                                                                                                                                                                                                                                                                                                                                                                                                                    | -8.1   | -1.0    | 4.9    | -1.5             | -25.1          | -30.3                      | -2.1                            |                            | -15.2                       | -5.7               | -26.2   |             | -6.6                  | -4.0                                                                                  | -6.1               | 10.4    | 7.5     | -15.1                 | 5.4                   | 5.2     | 36.6                  |                       |                       | -1.8                  | -0.9    |         |         |                       |         |         |         |         |                       |                       |         |                       |                       |                       |                       |         |                         |      |      |      |      |      |      |      |      |      |      |      |      |      |      |      |      |      |      |      |      |       |      |      |      |      |                       |       |      |      |      |      |      |       |      |       |       |       |       |       |       |       |       |       |       |       |       |        |       |       |       |       |       |      |      |      |      |      |      |      |      |      |      |      |      |      |      |      |      |      |      |      |      |      |      |      |      |      |          |    |   |   |    |    |    |    |    |    |   |   |    |    |    |    |        |    |                  |                  |    |                   |                   |                   |    |    |           |      |      |     |      |       |       |      |  |       |      |       |  |      |      |      |      |     |       |     |     |      |  |  |      |      |

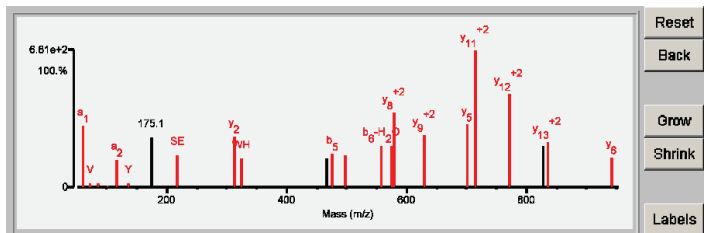

Result Summary

| Rank | Score | SPI (%) | BCS | # Unmatched Ions | Variable sites | Sequence                  | MH <sup>+</sup> Calculated (Da) | MH <sup>+</sup> Error (Da) | MH <sup>+</sup> Error (ppm) | Protein MW/pI (Da) | Species | Accession #            | Protein Name                                                                                             |
|------|-------|---------|-----|------------------|----------------|---------------------------|---------------------------------|----------------------------|-----------------------------|--------------------|---------|------------------------|----------------------------------------------------------------------------------------------------------|
| 1    | 17.50 | 80.9    | 9   | 7/25             | K137k          | (R)AAAYskLGNyAGAVQDCER(A) | 2043.9553                       | 114.0491                   | 2.9                         | 34063.3/4.81       | HUMAN   | <a href="#">Q43765</a> | Small glutamine-rich tetratricopeptide repeat-containing protein alpha OS=Homo sapiens GN=SGTA PE=1 SV=1 |

Detailed Results

| Rank | Score | SPI (%) | BCS | # Unmatched Ions | Variable sites | Sequence                                                 | MH <sup>+</sup> Calculated (Da) | MH <sup>+</sup> Error (Da) | MH <sup>+</sup> Error (ppm) | Protein MW/pI (Da) | Species | Accession #            | MS-Digest Index #      | Protein Name                                                                                             |
|------|-------|---------|-----|------------------|----------------|----------------------------------------------------------|---------------------------------|----------------------------|-----------------------------|--------------------|---------|------------------------|------------------------|----------------------------------------------------------------------------------------------------------|
| 1    | 17.50 | 80.9    | 9   | 7/25             | K137k          | (R)A A A I Y S K L G N Y A / G A / V Q / D / C E / R (A) | 2043.9553                       | 114.0491                   | 2.9                         | 34063.3/4.81       | HUMAN   | <a href="#">Q43765</a> | <a href="#">718827</a> | Small glutamine-rich tetratricopeptide repeat-containing protein alpha OS=Homo sapiens GN=SGTA PE=1 SV=1 |

  

| Fragment-ion (m/z)      | 84.081 | 86.095 | 115.085 | 136.074 | 143.078 | 175.117 | 200.121 | 214.118 | 228.135 | 330.091 | 345.123 <sup>+2</sup> | 349.176 | 464.192 | 579.217 | 608.809 <sup>+2</sup> | 668.326 | 689.285             | 699.348 | 730.889 | 806.344 | 891.415 <sup>+2</sup> | 934.411 | 972.962 <sup>+2</sup> | 1005.442 | 1008.472 <sup>+2</sup> |
|-------------------------|--------|--------|---------|---------|---------|---------|---------|---------|---------|---------|-----------------------|---------|---------|---------|-----------------------|---------|---------------------|---------|---------|---------|-----------------------|---------|-----------------------|----------|------------------------|
| Frac. Inten. (% of TIC) | 0.08   | 0.09   | 8.83    | 0.20    | 5.41    | 2.46    | 2.14    | 6.09    | 2.22    | 2.69    | 2.23                  | 4.53    | 2.43    | 5.00    | 3.95                  | 2.66    | 2.97                | 2.80    | 2.59    | 7.64    | 4.87                  | 15.63   | 3.83                  | 5.11     | 3.54                   |
| Rel. Inten. (% of BP)   | 0.49   | 0.58   | 56.52   | 1.29    | 34.63   | 15.73   | 13.69   | 38.94   | 14.22   | 17.23   | 14.24                 | 29.01   | 15.57   | 32.01   | 25.28                 | 17.00   | 19.01               | 17.91   | 16.57   | 48.92   | 31.20                 | 100.00  | 24.50                 | 32.73    | 22.67                  |
| Score                   | 0.50   | 0.22   | 0.50    | 1.00    | 0.75    | 1.50    | -0.14   | 0.50    | 0.75    | -0.17   | -0.14                 | 0.50    | 1.50    | 1.50    | -0.25                 | -0.17   | 0.50                | -0.18   | -0.17   | 1.50    | 1.50                  | 1.50    | 1.50                  | 1.50     | 1.50                   |
| Ion-type                | KQ     | LI     | az      | Y       | b2      | y1      |         | b3      | VQ      |         |                       | a4      | y5      | y4      |                       |         | y5-H <sub>2</sub> O | y6      |         |         |                       |         |                       |          |                        |
| Delta ppm               | -2.1   | -13.1  |         |         | -9.5    | -30.1   | -14.0   |         | -8.0    | -2.5    |                       | -34.2   | -0.2    | -3.9    |                       |         |                     |         |         |         | -2.1                  |         |                       |          |                        |
|                         |        |        | AA-28   |         | AA      |         |         |         |         |         |                       |         |         |         |                       |         |                     |         |         |         | Y15 <sup>+2</sup>     |         | Y16 <sup>+2</sup>     |          | Y17 <sup>+2</sup>      |
|                         |        |        | -27.7   |         | -30.1   |         |         |         |         |         |                       |         |         |         |                       |         |                     |         |         |         |                       |         | 15.7                  |          | 6.1                    |

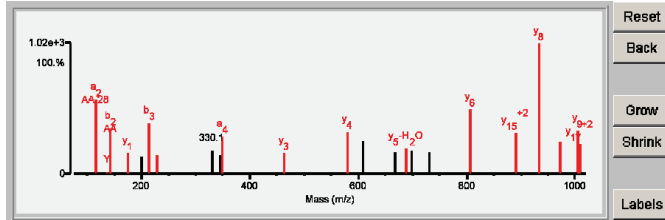

Result Summary

| Rank | Score | SP1 (%) | BCS | # Unmatched Ions | Variable sites | Sequence              | MH <sup>+</sup> Calculated (Da) | MH <sup>+</sup> Error (Da) | MH <sup>+</sup> Error (ppm) | Protein MW/pI (Da) | Species | Accession #            | Protein Name                                                                                          |
|------|-------|---------|-----|------------------|----------------|-----------------------|---------------------------------|----------------------------|-----------------------------|--------------------|---------|------------------------|-------------------------------------------------------------------------------------------------------|
| 1    | 14.16 | 68.9    | 6   | 8/25             | K160k          | (R)AICIDPAYS KAYGR(M) | 1584.7839                       | 114.0483                   | 3.1                         | 34063.3/4.81       | HUMAN   | <a href="#">O43765</a> | Small glutamine-rich tetratricopeptide repeat-containing protein alpha OS=Homo sapiens GN=SGTAP1 SV=1 |

Detailed Results

| Rank                                                                                                                                                                                                                                                                                                                                                                                                                                                                                                                                                                                                                                                                                                                                                                                                                                                                                                                                                                                                                                                                                                                                                                                                                                                                                                                                                                                                                                                                                                                                                                                                                                                                                                                                                                                                                                                                                                                                                                                                                                                                                                                                                                                                                                                                                                                                                                                                                                                                                                                                                              | Score  | SP1 (%) | BCS    | # Unmatched Ions | Variable sites | Sequence              | MH <sup>+</sup> Calculated (Da) | MH <sup>+</sup> Error (Da) | MH <sup>+</sup> Error (ppm) | Protein MW/pI (Da) | Species | Accession #            | MS-Digest Index #      | Protein Name                                                                                          |                    |         |         |                       |                       |         |                       |         |         |         |          |         |         |         |         |         |         |         |                       |                       |         |                       |         |         |         |          |                         |      |      |      |      |      |      |       |      |      |      |      |      |      |      |      |      |      |      |      |      |      |      |      |      |      |                       |       |       |      |       |      |       |        |       |       |       |       |       |       |       |       |       |       |       |       |       |       |       |       |       |       |       |       |       |      |       |      |      |      |      |      |      |      |       |      |       |      |      |      |      |      |       |       |      |       |      |      |          |  |  |    |  |   |       |    |    |    |    |       |  |    |     |      |    |  |                  |                      |  |  |    |    |    |  |           |  |  |      |  |       |       |      |       |       |       |     |  |       |  |     |       |     |       |       |  |  |     |      |      |      |
|-------------------------------------------------------------------------------------------------------------------------------------------------------------------------------------------------------------------------------------------------------------------------------------------------------------------------------------------------------------------------------------------------------------------------------------------------------------------------------------------------------------------------------------------------------------------------------------------------------------------------------------------------------------------------------------------------------------------------------------------------------------------------------------------------------------------------------------------------------------------------------------------------------------------------------------------------------------------------------------------------------------------------------------------------------------------------------------------------------------------------------------------------------------------------------------------------------------------------------------------------------------------------------------------------------------------------------------------------------------------------------------------------------------------------------------------------------------------------------------------------------------------------------------------------------------------------------------------------------------------------------------------------------------------------------------------------------------------------------------------------------------------------------------------------------------------------------------------------------------------------------------------------------------------------------------------------------------------------------------------------------------------------------------------------------------------------------------------------------------------------------------------------------------------------------------------------------------------------------------------------------------------------------------------------------------------------------------------------------------------------------------------------------------------------------------------------------------------------------------------------------------------------------------------------------------------|--------|---------|--------|------------------|----------------|-----------------------|---------------------------------|----------------------------|-----------------------------|--------------------|---------|------------------------|------------------------|-------------------------------------------------------------------------------------------------------|--------------------|---------|---------|-----------------------|-----------------------|---------|-----------------------|---------|---------|---------|----------|---------|---------|---------|---------|---------|---------|---------|-----------------------|-----------------------|---------|-----------------------|---------|---------|---------|----------|-------------------------|------|------|------|------|------|------|-------|------|------|------|------|------|------|------|------|------|------|------|------|------|------|------|------|------|------|-----------------------|-------|-------|------|-------|------|-------|--------|-------|-------|-------|-------|-------|-------|-------|-------|-------|-------|-------|-------|-------|-------|-------|-------|-------|-------|-------|-------|-------|------|-------|------|------|------|------|------|------|------|-------|------|-------|------|------|------|------|------|-------|-------|------|-------|------|------|----------|--|--|----|--|---|-------|----|----|----|----|-------|--|----|-----|------|----|--|------------------|----------------------|--|--|----|----|----|--|-----------|--|--|------|--|-------|-------|------|-------|-------|-------|-----|--|-------|--|-----|-------|-----|-------|-------|--|--|-----|------|------|------|
| 1                                                                                                                                                                                                                                                                                                                                                                                                                                                                                                                                                                                                                                                                                                                                                                                                                                                                                                                                                                                                                                                                                                                                                                                                                                                                                                                                                                                                                                                                                                                                                                                                                                                                                                                                                                                                                                                                                                                                                                                                                                                                                                                                                                                                                                                                                                                                                                                                                                                                                                                                                                 | 14.16  | 68.9    | 6      | 8/25             | K160k          | (R)AICIDPAYS KAYGR(M) | 1584.7839                       | 114.0483                   | 3.1                         | 34063.3/4.81       | HUMAN   | <a href="#">O43765</a> | <a href="#">718827</a> | Small glutamine-rich tetratricopeptide repeat-containing protein alpha OS=Homo sapiens GN=SGTAP1 SV=1 |                    |         |         |                       |                       |         |                       |         |         |         |          |         |         |         |         |         |         |         |                       |                       |         |                       |         |         |         |          |                         |      |      |      |      |      |      |       |      |      |      |      |      |      |      |      |      |      |      |      |      |      |      |      |      |      |                       |       |       |      |       |      |       |        |       |       |       |       |       |       |       |       |       |       |       |       |       |       |       |       |       |       |       |       |       |      |       |      |      |      |      |      |      |      |       |      |       |      |      |      |      |      |       |       |      |       |      |      |          |  |  |    |  |   |       |    |    |    |    |       |  |    |     |      |    |  |                  |                      |  |  |    |    |    |  |           |  |  |      |  |       |       |      |       |       |       |     |  |       |  |     |       |     |       |       |  |  |     |      |      |      |
| <table border="1"> <thead> <tr> <th>Fragment-ion (m/z)</th> <th>70.062</th> <th>84.079</th> <th>86.096</th> <th>133.041</th> <th>136.073</th> <th>141.097</th> <th>157.133</th> <th>169.094</th> <th>175.114</th> <th>185.125</th> <th>246.129</th> <th>248.126</th> <th>274.116</th> <th>288.115</th> <th>389.151</th> <th>398.199</th> <th>466.245</th> <th>479.734<sup>+2</sup></th> <th>506.237<sup>+2</sup></th> <th>720.265</th> <th>758.356<sup>+2</sup></th> <th>795.416</th> <th>901.429</th> <th>958.490</th> <th>1126.554</th> </tr> </thead> <tbody> <tr> <td>Frac. Inten. (% of TIC)</td> <td>5.20</td> <td>5.81</td> <td>0.32</td> <td>8.09</td> <td>0.08</td> <td>2.05</td> <td>13.43</td> <td>3.06</td> <td>2.51</td> <td>2.69</td> <td>9.36</td> <td>2.31</td> <td>2.14</td> <td>2.39</td> <td>5.21</td> <td>2.03</td> <td>2.87</td> <td>2.42</td> <td>4.83</td> <td>2.73</td> <td>2.35</td> <td>4.67</td> <td>2.22</td> <td>3.95</td> <td>7.27</td> </tr> <tr> <td>Rel. Inten. (% of BP)</td> <td>38.74</td> <td>43.26</td> <td>2.36</td> <td>60.23</td> <td>0.62</td> <td>15.30</td> <td>100.00</td> <td>22.80</td> <td>18.66</td> <td>20.06</td> <td>69.70</td> <td>17.20</td> <td>15.94</td> <td>17.76</td> <td>38.78</td> <td>15.10</td> <td>21.40</td> <td>18.05</td> <td>35.99</td> <td>20.36</td> <td>17.48</td> <td>34.79</td> <td>16.54</td> <td>29.45</td> <td>54.15</td> </tr> <tr> <td>Score</td> <td>-0.39</td> <td>-0.43</td> <td>0.22</td> <td>-0.60</td> <td>1.00</td> <td>0.50</td> <td>0.50</td> <td>0.75</td> <td>1.50</td> <td>0.50</td> <td>0.50</td> <td>-0.17</td> <td>0.75</td> <td>-0.18</td> <td>0.75</td> <td>1.50</td> <td>1.50</td> <td>1.50</td> <td>0.50</td> <td>-0.20</td> <td>-0.17</td> <td>1.50</td> <td>-0.17</td> <td>1.50</td> <td>1.50</td> </tr> <tr> <td>Ion-type</td> <td></td> <td></td> <td>LI</td> <td></td> <td>Y</td> <td>PA-28</td> <td>42</td> <td>PA</td> <td>y1</td> <td>b2</td> <td>CI-28</td> <td></td> <td>CI</td> <td>CID</td> <td>y++6</td> <td>y4</td> <td></td> <td>y7<sup>+2</sup></td> <td>y8-H2O<sup>+2</sup></td> <td></td> <td></td> <td>y6</td> <td>y7</td> <td>y9</td> <td></td> </tr> <tr> <td>Delta ppm</td> <td></td> <td></td> <td>-3.8</td> <td></td> <td>-19.0</td> <td>-34.3</td> <td>-3.4</td> <td>-20.4</td> <td>-30.0</td> <td>-21.4</td> <td>6.6</td> <td></td> <td>-20.4</td> <td></td> <td>5.6</td> <td>-26.4</td> <td>9.1</td> <td>-13.5</td> <td>-34.1</td> <td></td> <td></td> <td>7.1</td> <td>16.4</td> <td>16.4</td> <td>-9.3</td> </tr> </tbody> </table> |        |         |        |                  |                |                       |                                 |                            |                             |                    |         |                        |                        |                                                                                                       | Fragment-ion (m/z) | 70.062  | 84.079  | 86.096                | 133.041               | 136.073 | 141.097               | 157.133 | 169.094 | 175.114 | 185.125  | 246.129 | 248.126 | 274.116 | 288.115 | 389.151 | 398.199 | 466.245 | 479.734 <sup>+2</sup> | 506.237 <sup>+2</sup> | 720.265 | 758.356 <sup>+2</sup> | 795.416 | 901.429 | 958.490 | 1126.554 | Frac. Inten. (% of TIC) | 5.20 | 5.81 | 0.32 | 8.09 | 0.08 | 2.05 | 13.43 | 3.06 | 2.51 | 2.69 | 9.36 | 2.31 | 2.14 | 2.39 | 5.21 | 2.03 | 2.87 | 2.42 | 4.83 | 2.73 | 2.35 | 4.67 | 2.22 | 3.95 | 7.27 | Rel. Inten. (% of BP) | 38.74 | 43.26 | 2.36 | 60.23 | 0.62 | 15.30 | 100.00 | 22.80 | 18.66 | 20.06 | 69.70 | 17.20 | 15.94 | 17.76 | 38.78 | 15.10 | 21.40 | 18.05 | 35.99 | 20.36 | 17.48 | 34.79 | 16.54 | 29.45 | 54.15 | Score | -0.39 | -0.43 | 0.22 | -0.60 | 1.00 | 0.50 | 0.50 | 0.75 | 1.50 | 0.50 | 0.50 | -0.17 | 0.75 | -0.18 | 0.75 | 1.50 | 1.50 | 1.50 | 0.50 | -0.20 | -0.17 | 1.50 | -0.17 | 1.50 | 1.50 | Ion-type |  |  | LI |  | Y | PA-28 | 42 | PA | y1 | b2 | CI-28 |  | CI | CID | y++6 | y4 |  | y7 <sup>+2</sup> | y8-H2O <sup>+2</sup> |  |  | y6 | y7 | y9 |  | Delta ppm |  |  | -3.8 |  | -19.0 | -34.3 | -3.4 | -20.4 | -30.0 | -21.4 | 6.6 |  | -20.4 |  | 5.6 | -26.4 | 9.1 | -13.5 | -34.1 |  |  | 7.1 | 16.4 | 16.4 | -9.3 |
| Fragment-ion (m/z)                                                                                                                                                                                                                                                                                                                                                                                                                                                                                                                                                                                                                                                                                                                                                                                                                                                                                                                                                                                                                                                                                                                                                                                                                                                                                                                                                                                                                                                                                                                                                                                                                                                                                                                                                                                                                                                                                                                                                                                                                                                                                                                                                                                                                                                                                                                                                                                                                                                                                                                                                | 70.062 | 84.079  | 86.096 | 133.041          | 136.073        | 141.097               | 157.133                         | 169.094                    | 175.114                     | 185.125            | 246.129 | 248.126                | 274.116                | 288.115                                                                                               | 389.151            | 398.199 | 466.245 | 479.734 <sup>+2</sup> | 506.237 <sup>+2</sup> | 720.265 | 758.356 <sup>+2</sup> | 795.416 | 901.429 | 958.490 | 1126.554 |         |         |         |         |         |         |         |                       |                       |         |                       |         |         |         |          |                         |      |      |      |      |      |      |       |      |      |      |      |      |      |      |      |      |      |      |      |      |      |      |      |      |      |                       |       |       |      |       |      |       |        |       |       |       |       |       |       |       |       |       |       |       |       |       |       |       |       |       |       |       |       |       |      |       |      |      |      |      |      |      |      |       |      |       |      |      |      |      |      |       |       |      |       |      |      |          |  |  |    |  |   |       |    |    |    |    |       |  |    |     |      |    |  |                  |                      |  |  |    |    |    |  |           |  |  |      |  |       |       |      |       |       |       |     |  |       |  |     |       |     |       |       |  |  |     |      |      |      |
| Frac. Inten. (% of TIC)                                                                                                                                                                                                                                                                                                                                                                                                                                                                                                                                                                                                                                                                                                                                                                                                                                                                                                                                                                                                                                                                                                                                                                                                                                                                                                                                                                                                                                                                                                                                                                                                                                                                                                                                                                                                                                                                                                                                                                                                                                                                                                                                                                                                                                                                                                                                                                                                                                                                                                                                           | 5.20   | 5.81    | 0.32   | 8.09             | 0.08           | 2.05                  | 13.43                           | 3.06                       | 2.51                        | 2.69               | 9.36    | 2.31                   | 2.14                   | 2.39                                                                                                  | 5.21               | 2.03    | 2.87    | 2.42                  | 4.83                  | 2.73    | 2.35                  | 4.67    | 2.22    | 3.95    | 7.27     |         |         |         |         |         |         |         |                       |                       |         |                       |         |         |         |          |                         |      |      |      |      |      |      |       |      |      |      |      |      |      |      |      |      |      |      |      |      |      |      |      |      |      |                       |       |       |      |       |      |       |        |       |       |       |       |       |       |       |       |       |       |       |       |       |       |       |       |       |       |       |       |       |      |       |      |      |      |      |      |      |      |       |      |       |      |      |      |      |      |       |       |      |       |      |      |          |  |  |    |  |   |       |    |    |    |    |       |  |    |     |      |    |  |                  |                      |  |  |    |    |    |  |           |  |  |      |  |       |       |      |       |       |       |     |  |       |  |     |       |     |       |       |  |  |     |      |      |      |
| Rel. Inten. (% of BP)                                                                                                                                                                                                                                                                                                                                                                                                                                                                                                                                                                                                                                                                                                                                                                                                                                                                                                                                                                                                                                                                                                                                                                                                                                                                                                                                                                                                                                                                                                                                                                                                                                                                                                                                                                                                                                                                                                                                                                                                                                                                                                                                                                                                                                                                                                                                                                                                                                                                                                                                             | 38.74  | 43.26   | 2.36   | 60.23            | 0.62           | 15.30                 | 100.00                          | 22.80                      | 18.66                       | 20.06              | 69.70   | 17.20                  | 15.94                  | 17.76                                                                                                 | 38.78              | 15.10   | 21.40   | 18.05                 | 35.99                 | 20.36   | 17.48                 | 34.79   | 16.54   | 29.45   | 54.15    |         |         |         |         |         |         |         |                       |                       |         |                       |         |         |         |          |                         |      |      |      |      |      |      |       |      |      |      |      |      |      |      |      |      |      |      |      |      |      |      |      |      |      |                       |       |       |      |       |      |       |        |       |       |       |       |       |       |       |       |       |       |       |       |       |       |       |       |       |       |       |       |       |      |       |      |      |      |      |      |      |      |       |      |       |      |      |      |      |      |       |       |      |       |      |      |          |  |  |    |  |   |       |    |    |    |    |       |  |    |     |      |    |  |                  |                      |  |  |    |    |    |  |           |  |  |      |  |       |       |      |       |       |       |     |  |       |  |     |       |     |       |       |  |  |     |      |      |      |
| Score                                                                                                                                                                                                                                                                                                                                                                                                                                                                                                                                                                                                                                                                                                                                                                                                                                                                                                                                                                                                                                                                                                                                                                                                                                                                                                                                                                                                                                                                                                                                                                                                                                                                                                                                                                                                                                                                                                                                                                                                                                                                                                                                                                                                                                                                                                                                                                                                                                                                                                                                                             | -0.39  | -0.43   | 0.22   | -0.60            | 1.00           | 0.50                  | 0.50                            | 0.75                       | 1.50                        | 0.50               | 0.50    | -0.17                  | 0.75                   | -0.18                                                                                                 | 0.75               | 1.50    | 1.50    | 1.50                  | 0.50                  | -0.20   | -0.17                 | 1.50    | -0.17   | 1.50    | 1.50     |         |         |         |         |         |         |         |                       |                       |         |                       |         |         |         |          |                         |      |      |      |      |      |      |       |      |      |      |      |      |      |      |      |      |      |      |      |      |      |      |      |      |      |                       |       |       |      |       |      |       |        |       |       |       |       |       |       |       |       |       |       |       |       |       |       |       |       |       |       |       |       |       |      |       |      |      |      |      |      |      |      |       |      |       |      |      |      |      |      |       |       |      |       |      |      |          |  |  |    |  |   |       |    |    |    |    |       |  |    |     |      |    |  |                  |                      |  |  |    |    |    |  |           |  |  |      |  |       |       |      |       |       |       |     |  |       |  |     |       |     |       |       |  |  |     |      |      |      |
| Ion-type                                                                                                                                                                                                                                                                                                                                                                                                                                                                                                                                                                                                                                                                                                                                                                                                                                                                                                                                                                                                                                                                                                                                                                                                                                                                                                                                                                                                                                                                                                                                                                                                                                                                                                                                                                                                                                                                                                                                                                                                                                                                                                                                                                                                                                                                                                                                                                                                                                                                                                                                                          |        |         | LI     |                  | Y              | PA-28                 | 42                              | PA                         | y1                          | b2                 | CI-28   |                        | CI                     | CID                                                                                                   | y++6               | y4      |         | y7 <sup>+2</sup>      | y8-H2O <sup>+2</sup>  |         |                       | y6      | y7      | y9      |          |         |         |         |         |         |         |         |                       |                       |         |                       |         |         |         |          |                         |      |      |      |      |      |      |       |      |      |      |      |      |      |      |      |      |      |      |      |      |      |      |      |      |      |                       |       |       |      |       |      |       |        |       |       |       |       |       |       |       |       |       |       |       |       |       |       |       |       |       |       |       |       |       |      |       |      |      |      |      |      |      |      |       |      |       |      |      |      |      |      |       |       |      |       |      |      |          |  |  |    |  |   |       |    |    |    |    |       |  |    |     |      |    |  |                  |                      |  |  |    |    |    |  |           |  |  |      |  |       |       |      |       |       |       |     |  |       |  |     |       |     |       |       |  |  |     |      |      |      |
| Delta ppm                                                                                                                                                                                                                                                                                                                                                                                                                                                                                                                                                                                                                                                                                                                                                                                                                                                                                                                                                                                                                                                                                                                                                                                                                                                                                                                                                                                                                                                                                                                                                                                                                                                                                                                                                                                                                                                                                                                                                                                                                                                                                                                                                                                                                                                                                                                                                                                                                                                                                                                                                         |        |         | -3.8   |                  | -19.0          | -34.3                 | -3.4                            | -20.4                      | -30.0                       | -21.4              | 6.6     |                        | -20.4                  |                                                                                                       | 5.6                | -26.4   | 9.1     | -13.5                 | -34.1                 |         |                       | 7.1     | 16.4    | 16.4    | -9.3     |         |         |         |         |         |         |         |                       |                       |         |                       |         |         |         |          |                         |      |      |      |      |      |      |       |      |      |      |      |      |      |      |      |      |      |      |      |      |      |      |      |      |      |                       |       |       |      |       |      |       |        |       |       |       |       |       |       |       |       |       |       |       |       |       |       |       |       |       |       |       |       |       |      |       |      |      |      |      |      |      |      |       |      |       |      |      |      |      |      |       |       |      |       |      |      |          |  |  |    |  |   |       |    |    |    |    |       |  |    |     |      |    |  |                  |                      |  |  |    |    |    |  |           |  |  |      |  |       |       |      |       |       |       |     |  |       |  |     |       |     |       |       |  |  |     |      |      |      |

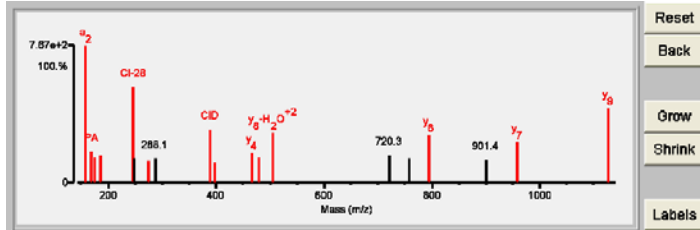

Result Summary

| Rank | Score | SPI (%) | BCS | # Unmatched Ions | Variable sites | Sequence                           | MH <sup>+</sup> Calculated (Da) | MH <sup>+</sup> Error (Da) | MH <sup>+</sup> Error (ppm) | Protein MW/pI (Da) | Species | Accession # | Protein Name                                                   |
|------|-------|---------|-----|------------------|----------------|------------------------------------|---------------------------------|----------------------------|-----------------------------|--------------------|---------|-------------|----------------------------------------------------------------|
| 1    | 15.55 | 81.3    | 8   | 5/25             | K419k          | (K)ASKPLPPAPAPDEYLVSPITGEKIPASK(M) | 2873.5659                       | 114.0587                   | 5.3                         | 88886.6/5.15       | HUMAN   | Q15459      | Splicing factor 3 subunit 1 OS=Homo sapiens GN=SF3A1 PE=1 SV=1 |
| 2    | 13.05 | 69.7    | 7   | 6/25             | K424k          | (K)ASKPLPPAPAPDEYLVSPITGEKIPASK(M) | 2873.5659                       | 114.0587                   | 5.3                         | 88886.6/5.15       | HUMAN   | Q15459      | Splicing factor 3 subunit 1 OS=Homo sapiens GN=SF3A1 PE=1 SV=1 |

Detailed Results

| Rank                                                                                                                                                                                                                                                                                                                                                                                                                                                                                                                                                                                                                                                                                                                                                                                                                                                                                                                                                                                                                                                                                                                                                                                                                                                                                                                                                                                                                                                                                                                                                                                                                                                                                                                                                                                                                                                                                                                                                                                                                                                                                                                                                                                                                                                                                                                                                                                                                                                                                                                                                                                                                                                                                                                                                                                                    | Score  | SPI (%) | BCS    | # Unmatched Ions | Variable sites | Sequence                                                        | MH <sup>+</sup> Calculated (Da) | MH <sup>+</sup> Error (Da) | MH <sup>+</sup> Error (ppm) | Protein MW/pI (Da) | Species | Accession # | MS-Digest Index #             | Protein Name                                                   |                               |                               |                       |                |                   |                 |         |                               |                |                               |                 |         |         |                       |         |                       |                       |                       |         |         |         |         |                        |          |                        |          |                         |      |      |      |      |      |      |      |      |      |      |      |       |      |      |      |      |      |      |      |      |      |      |      |      |      |                       |      |       |      |      |       |       |       |       |       |       |       |        |       |       |       |       |       |       |       |       |       |       |       |       |       |       |      |       |      |      |      |      |       |      |      |      |       |      |      |      |      |      |       |      |      |      |       |      |      |      |      |          |    |    |    |    |       |    |  |    |    |                  |  |    |                               |                    |                               |                               |  |                |                   |                 |  |                               |                |                               |                 |           |      |  |       |      |      |       |  |       |       |     |  |     |       |       |     |      |  |      |       |     |  |      |       |      |      |
|---------------------------------------------------------------------------------------------------------------------------------------------------------------------------------------------------------------------------------------------------------------------------------------------------------------------------------------------------------------------------------------------------------------------------------------------------------------------------------------------------------------------------------------------------------------------------------------------------------------------------------------------------------------------------------------------------------------------------------------------------------------------------------------------------------------------------------------------------------------------------------------------------------------------------------------------------------------------------------------------------------------------------------------------------------------------------------------------------------------------------------------------------------------------------------------------------------------------------------------------------------------------------------------------------------------------------------------------------------------------------------------------------------------------------------------------------------------------------------------------------------------------------------------------------------------------------------------------------------------------------------------------------------------------------------------------------------------------------------------------------------------------------------------------------------------------------------------------------------------------------------------------------------------------------------------------------------------------------------------------------------------------------------------------------------------------------------------------------------------------------------------------------------------------------------------------------------------------------------------------------------------------------------------------------------------------------------------------------------------------------------------------------------------------------------------------------------------------------------------------------------------------------------------------------------------------------------------------------------------------------------------------------------------------------------------------------------------------------------------------------------------------------------------------------------|--------|---------|--------|------------------|----------------|-----------------------------------------------------------------|---------------------------------|----------------------------|-----------------------------|--------------------|---------|-------------|-------------------------------|----------------------------------------------------------------|-------------------------------|-------------------------------|-----------------------|----------------|-------------------|-----------------|---------|-------------------------------|----------------|-------------------------------|-----------------|---------|---------|-----------------------|---------|-----------------------|-----------------------|-----------------------|---------|---------|---------|---------|------------------------|----------|------------------------|----------|-------------------------|------|------|------|------|------|------|------|------|------|------|------|-------|------|------|------|------|------|------|------|------|------|------|------|------|------|-----------------------|------|-------|------|------|-------|-------|-------|-------|-------|-------|-------|--------|-------|-------|-------|-------|-------|-------|-------|-------|-------|-------|-------|-------|-------|-------|------|-------|------|------|------|------|-------|------|------|------|-------|------|------|------|------|------|-------|------|------|------|-------|------|------|------|------|----------|----|----|----|----|-------|----|--|----|----|------------------|--|----|-------------------------------|--------------------|-------------------------------|-------------------------------|--|----------------|-------------------|-----------------|--|-------------------------------|----------------|-------------------------------|-----------------|-----------|------|--|-------|------|------|-------|--|-------|-------|-----|--|-----|-------|-------|-----|------|--|------|-------|-----|--|------|-------|------|------|
| 1                                                                                                                                                                                                                                                                                                                                                                                                                                                                                                                                                                                                                                                                                                                                                                                                                                                                                                                                                                                                                                                                                                                                                                                                                                                                                                                                                                                                                                                                                                                                                                                                                                                                                                                                                                                                                                                                                                                                                                                                                                                                                                                                                                                                                                                                                                                                                                                                                                                                                                                                                                                                                                                                                                                                                                                                       | 15.55  | 81.3    | 8      | 5/25             | K419k          | (K) A S K P L P P A P A P D E Y L V S P I T G E K I P A S K (M) | 2873.5659                       | 114.0587                   | 5.3                         | 88886.6/5.15       | HUMAN   | Q15459      | 717209                        | Splicing factor 3 subunit 1 OS=Homo sapiens GN=SF3A1 PE=1 SV=1 |                               |                               |                       |                |                   |                 |         |                               |                |                               |                 |         |         |                       |         |                       |                       |                       |         |         |         |         |                        |          |                        |          |                         |      |      |      |      |      |      |      |      |      |      |      |       |      |      |      |      |      |      |      |      |      |      |      |      |      |                       |      |       |      |      |       |       |       |       |       |       |       |        |       |       |       |       |       |       |       |       |       |       |       |       |       |       |      |       |      |      |      |      |       |      |      |      |       |      |      |      |      |      |       |      |      |      |       |      |      |      |      |          |    |    |    |    |       |    |  |    |    |                  |  |    |                               |                    |                               |                               |  |                |                   |                 |  |                               |                |                               |                 |           |      |  |       |      |      |       |  |       |       |     |  |     |       |       |     |      |  |      |       |     |  |      |       |      |      |
| <table border="1"> <thead> <tr> <th>Fragment-ion (m/z)</th> <th>70.067</th> <th>71.068</th> <th>84.078</th> <th>86.096</th> <th>141.103</th> <th>169.094</th> <th>187.145</th> <th>211.140</th> <th>213.082</th> <th>297.685</th> <th>344.141</th> <th>402.235</th> <th>465.761<sup>+2</sup></th> <th>514.286</th> <th>627.858<sup>+2</sup></th> <th>686.706<sup>+3</sup></th> <th>705.421<sup>+2</sup></th> <th>762.460</th> <th>774.391</th> <th>930.548</th> <th>938.447</th> <th>1029.533<sup>+2</sup></th> <th>1044.551</th> <th>1113.607<sup>+2</sup></th> <th>1254.703</th> </tr> </thead> <tbody> <tr> <td>Frac. Inten. (% of TIC)</td> <td>0.01</td> <td>4.74</td> <td>0.09</td> <td>0.14</td> <td>3.07</td> <td>4.47</td> <td>2.87</td> <td>4.19</td> <td>2.84</td> <td>3.21</td> <td>3.77</td> <td>11.56</td> <td>3.36</td> <td>2.95</td> <td>6.72</td> <td>3.63</td> <td>4.38</td> <td>6.54</td> <td>2.93</td> <td>7.23</td> <td>2.98</td> <td>4.69</td> <td>3.10</td> <td>7.25</td> <td>3.27</td> </tr> <tr> <td>Rel. Inten. (% of BP)</td> <td>0.11</td> <td>40.99</td> <td>0.82</td> <td>1.21</td> <td>26.54</td> <td>38.65</td> <td>24.83</td> <td>36.20</td> <td>24.54</td> <td>27.80</td> <td>32.62</td> <td>100.00</td> <td>29.10</td> <td>25.52</td> <td>58.09</td> <td>31.40</td> <td>37.87</td> <td>56.55</td> <td>25.35</td> <td>62.54</td> <td>25.74</td> <td>40.58</td> <td>26.80</td> <td>62.74</td> <td>28.30</td> </tr> <tr> <td>Score</td> <td>0.20</td> <td>-0.41</td> <td>0.50</td> <td>0.22</td> <td>0.50</td> <td>0.75</td> <td>-0.25</td> <td>0.75</td> <td>0.75</td> <td>0.50</td> <td>-0.33</td> <td>1.50</td> <td>0.50</td> <td>0.50</td> <td>1.50</td> <td>1.50</td> <td>-0.38</td> <td>0.50</td> <td>0.50</td> <td>0.50</td> <td>-0.26</td> <td>1.50</td> <td>1.50</td> <td>1.50</td> <td>1.50</td> </tr> <tr> <td>Ion-type</td> <td>PR</td> <td>PR</td> <td>KQ</td> <td>LI</td> <td>PA-28</td> <td>PA</td> <td></td> <td>IP</td> <td>PD</td> <td>b<sup>++6</sup></td> <td></td> <td>Y4</td> <td>b<sup>10</sup><sup>+2</sup></td> <td>b<sup>+++11</sup></td> <td>y<sup>11</sup><sup>+2</sup></td> <td>y<sup>18</sup><sup>+3</sup></td> <td></td> <td>b<sup>8</sup></td> <td>b<sup>++15</sup></td> <td>b<sup>10</sup></td> <td></td> <td>y<sup>18</sup><sup>+2</sup></td> <td>y<sup>9</sup></td> <td>y<sup>20</sup><sup>+2</sup></td> <td>y<sup>11</sup></td> </tr> <tr> <td>Delta ppm</td> <td>19.6</td> <td></td> <td>-39.0</td> <td>-7.3</td> <td>-5.2</td> <td>-26.9</td> <td></td> <td>-22.7</td> <td>-27.6</td> <td>0.4</td> <td></td> <td>0.5</td> <td>-29.8</td> <td>-28.6</td> <td>3.3</td> <td>13.8</td> <td></td> <td>10.2</td> <td>-23.4</td> <td>7.1</td> <td></td> <td>-8.4</td> <td>-16.8</td> <td>18.4</td> <td>-1.7</td> </tr> </tbody> </table> |        |         |        |                  |                |                                                                 |                                 |                            |                             |                    |         |             |                               |                                                                | Fragment-ion (m/z)            | 70.067                        | 71.068                | 84.078         | 86.096            | 141.103         | 169.094 | 187.145                       | 211.140        | 213.082                       | 297.685         | 344.141 | 402.235 | 465.761 <sup>+2</sup> | 514.286 | 627.858 <sup>+2</sup> | 686.706 <sup>+3</sup> | 705.421 <sup>+2</sup> | 762.460 | 774.391 | 930.548 | 938.447 | 1029.533 <sup>+2</sup> | 1044.551 | 1113.607 <sup>+2</sup> | 1254.703 | Frac. Inten. (% of TIC) | 0.01 | 4.74 | 0.09 | 0.14 | 3.07 | 4.47 | 2.87 | 4.19 | 2.84 | 3.21 | 3.77 | 11.56 | 3.36 | 2.95 | 6.72 | 3.63 | 4.38 | 6.54 | 2.93 | 7.23 | 2.98 | 4.69 | 3.10 | 7.25 | 3.27 | Rel. Inten. (% of BP) | 0.11 | 40.99 | 0.82 | 1.21 | 26.54 | 38.65 | 24.83 | 36.20 | 24.54 | 27.80 | 32.62 | 100.00 | 29.10 | 25.52 | 58.09 | 31.40 | 37.87 | 56.55 | 25.35 | 62.54 | 25.74 | 40.58 | 26.80 | 62.74 | 28.30 | Score | 0.20 | -0.41 | 0.50 | 0.22 | 0.50 | 0.75 | -0.25 | 0.75 | 0.75 | 0.50 | -0.33 | 1.50 | 0.50 | 0.50 | 1.50 | 1.50 | -0.38 | 0.50 | 0.50 | 0.50 | -0.26 | 1.50 | 1.50 | 1.50 | 1.50 | Ion-type | PR | PR | KQ | LI | PA-28 | PA |  | IP | PD | b <sup>++6</sup> |  | Y4 | b <sup>10</sup> <sup>+2</sup> | b <sup>+++11</sup> | y <sup>11</sup> <sup>+2</sup> | y <sup>18</sup> <sup>+3</sup> |  | b <sup>8</sup> | b <sup>++15</sup> | b <sup>10</sup> |  | y <sup>18</sup> <sup>+2</sup> | y <sup>9</sup> | y <sup>20</sup> <sup>+2</sup> | y <sup>11</sup> | Delta ppm | 19.6 |  | -39.0 | -7.3 | -5.2 | -26.9 |  | -22.7 | -27.6 | 0.4 |  | 0.5 | -29.8 | -28.6 | 3.3 | 13.8 |  | 10.2 | -23.4 | 7.1 |  | -8.4 | -16.8 | 18.4 | -1.7 |
| Fragment-ion (m/z)                                                                                                                                                                                                                                                                                                                                                                                                                                                                                                                                                                                                                                                                                                                                                                                                                                                                                                                                                                                                                                                                                                                                                                                                                                                                                                                                                                                                                                                                                                                                                                                                                                                                                                                                                                                                                                                                                                                                                                                                                                                                                                                                                                                                                                                                                                                                                                                                                                                                                                                                                                                                                                                                                                                                                                                      | 70.067 | 71.068  | 84.078 | 86.096           | 141.103        | 169.094                                                         | 187.145                         | 211.140                    | 213.082                     | 297.685            | 344.141 | 402.235     | 465.761 <sup>+2</sup>         | 514.286                                                        | 627.858 <sup>+2</sup>         | 686.706 <sup>+3</sup>         | 705.421 <sup>+2</sup> | 762.460        | 774.391           | 930.548         | 938.447 | 1029.533 <sup>+2</sup>        | 1044.551       | 1113.607 <sup>+2</sup>        | 1254.703        |         |         |                       |         |                       |                       |                       |         |         |         |         |                        |          |                        |          |                         |      |      |      |      |      |      |      |      |      |      |      |       |      |      |      |      |      |      |      |      |      |      |      |      |      |                       |      |       |      |      |       |       |       |       |       |       |       |        |       |       |       |       |       |       |       |       |       |       |       |       |       |       |      |       |      |      |      |      |       |      |      |      |       |      |      |      |      |      |       |      |      |      |       |      |      |      |      |          |    |    |    |    |       |    |  |    |    |                  |  |    |                               |                    |                               |                               |  |                |                   |                 |  |                               |                |                               |                 |           |      |  |       |      |      |       |  |       |       |     |  |     |       |       |     |      |  |      |       |     |  |      |       |      |      |
| Frac. Inten. (% of TIC)                                                                                                                                                                                                                                                                                                                                                                                                                                                                                                                                                                                                                                                                                                                                                                                                                                                                                                                                                                                                                                                                                                                                                                                                                                                                                                                                                                                                                                                                                                                                                                                                                                                                                                                                                                                                                                                                                                                                                                                                                                                                                                                                                                                                                                                                                                                                                                                                                                                                                                                                                                                                                                                                                                                                                                                 | 0.01   | 4.74    | 0.09   | 0.14             | 3.07           | 4.47                                                            | 2.87                            | 4.19                       | 2.84                        | 3.21               | 3.77    | 11.56       | 3.36                          | 2.95                                                           | 6.72                          | 3.63                          | 4.38                  | 6.54           | 2.93              | 7.23            | 2.98    | 4.69                          | 3.10           | 7.25                          | 3.27            |         |         |                       |         |                       |                       |                       |         |         |         |         |                        |          |                        |          |                         |      |      |      |      |      |      |      |      |      |      |      |       |      |      |      |      |      |      |      |      |      |      |      |      |      |                       |      |       |      |      |       |       |       |       |       |       |       |        |       |       |       |       |       |       |       |       |       |       |       |       |       |       |      |       |      |      |      |      |       |      |      |      |       |      |      |      |      |      |       |      |      |      |       |      |      |      |      |          |    |    |    |    |       |    |  |    |    |                  |  |    |                               |                    |                               |                               |  |                |                   |                 |  |                               |                |                               |                 |           |      |  |       |      |      |       |  |       |       |     |  |     |       |       |     |      |  |      |       |     |  |      |       |      |      |
| Rel. Inten. (% of BP)                                                                                                                                                                                                                                                                                                                                                                                                                                                                                                                                                                                                                                                                                                                                                                                                                                                                                                                                                                                                                                                                                                                                                                                                                                                                                                                                                                                                                                                                                                                                                                                                                                                                                                                                                                                                                                                                                                                                                                                                                                                                                                                                                                                                                                                                                                                                                                                                                                                                                                                                                                                                                                                                                                                                                                                   | 0.11   | 40.99   | 0.82   | 1.21             | 26.54          | 38.65                                                           | 24.83                           | 36.20                      | 24.54                       | 27.80              | 32.62   | 100.00      | 29.10                         | 25.52                                                          | 58.09                         | 31.40                         | 37.87                 | 56.55          | 25.35             | 62.54           | 25.74   | 40.58                         | 26.80          | 62.74                         | 28.30           |         |         |                       |         |                       |                       |                       |         |         |         |         |                        |          |                        |          |                         |      |      |      |      |      |      |      |      |      |      |      |       |      |      |      |      |      |      |      |      |      |      |      |      |      |                       |      |       |      |      |       |       |       |       |       |       |       |        |       |       |       |       |       |       |       |       |       |       |       |       |       |       |      |       |      |      |      |      |       |      |      |      |       |      |      |      |      |      |       |      |      |      |       |      |      |      |      |          |    |    |    |    |       |    |  |    |    |                  |  |    |                               |                    |                               |                               |  |                |                   |                 |  |                               |                |                               |                 |           |      |  |       |      |      |       |  |       |       |     |  |     |       |       |     |      |  |      |       |     |  |      |       |      |      |
| Score                                                                                                                                                                                                                                                                                                                                                                                                                                                                                                                                                                                                                                                                                                                                                                                                                                                                                                                                                                                                                                                                                                                                                                                                                                                                                                                                                                                                                                                                                                                                                                                                                                                                                                                                                                                                                                                                                                                                                                                                                                                                                                                                                                                                                                                                                                                                                                                                                                                                                                                                                                                                                                                                                                                                                                                                   | 0.20   | -0.41   | 0.50   | 0.22             | 0.50           | 0.75                                                            | -0.25                           | 0.75                       | 0.75                        | 0.50               | -0.33   | 1.50        | 0.50                          | 0.50                                                           | 1.50                          | 1.50                          | -0.38                 | 0.50           | 0.50              | 0.50            | -0.26   | 1.50                          | 1.50           | 1.50                          | 1.50            |         |         |                       |         |                       |                       |                       |         |         |         |         |                        |          |                        |          |                         |      |      |      |      |      |      |      |      |      |      |      |       |      |      |      |      |      |      |      |      |      |      |      |      |      |                       |      |       |      |      |       |       |       |       |       |       |       |        |       |       |       |       |       |       |       |       |       |       |       |       |       |       |      |       |      |      |      |      |       |      |      |      |       |      |      |      |      |      |       |      |      |      |       |      |      |      |      |          |    |    |    |    |       |    |  |    |    |                  |  |    |                               |                    |                               |                               |  |                |                   |                 |  |                               |                |                               |                 |           |      |  |       |      |      |       |  |       |       |     |  |     |       |       |     |      |  |      |       |     |  |      |       |      |      |
| Ion-type                                                                                                                                                                                                                                                                                                                                                                                                                                                                                                                                                                                                                                                                                                                                                                                                                                                                                                                                                                                                                                                                                                                                                                                                                                                                                                                                                                                                                                                                                                                                                                                                                                                                                                                                                                                                                                                                                                                                                                                                                                                                                                                                                                                                                                                                                                                                                                                                                                                                                                                                                                                                                                                                                                                                                                                                | PR     | PR      | KQ     | LI               | PA-28          | PA                                                              |                                 | IP                         | PD                          | b <sup>++6</sup>   |         | Y4          | b <sup>10</sup> <sup>+2</sup> | b <sup>+++11</sup>                                             | y <sup>11</sup> <sup>+2</sup> | y <sup>18</sup> <sup>+3</sup> |                       | b <sup>8</sup> | b <sup>++15</sup> | b <sup>10</sup> |         | y <sup>18</sup> <sup>+2</sup> | y <sup>9</sup> | y <sup>20</sup> <sup>+2</sup> | y <sup>11</sup> |         |         |                       |         |                       |                       |                       |         |         |         |         |                        |          |                        |          |                         |      |      |      |      |      |      |      |      |      |      |      |       |      |      |      |      |      |      |      |      |      |      |      |      |      |                       |      |       |      |      |       |       |       |       |       |       |       |        |       |       |       |       |       |       |       |       |       |       |       |       |       |       |      |       |      |      |      |      |       |      |      |      |       |      |      |      |      |      |       |      |      |      |       |      |      |      |      |          |    |    |    |    |       |    |  |    |    |                  |  |    |                               |                    |                               |                               |  |                |                   |                 |  |                               |                |                               |                 |           |      |  |       |      |      |       |  |       |       |     |  |     |       |       |     |      |  |      |       |     |  |      |       |      |      |
| Delta ppm                                                                                                                                                                                                                                                                                                                                                                                                                                                                                                                                                                                                                                                                                                                                                                                                                                                                                                                                                                                                                                                                                                                                                                                                                                                                                                                                                                                                                                                                                                                                                                                                                                                                                                                                                                                                                                                                                                                                                                                                                                                                                                                                                                                                                                                                                                                                                                                                                                                                                                                                                                                                                                                                                                                                                                                               | 19.6   |         | -39.0  | -7.3             | -5.2           | -26.9                                                           |                                 | -22.7                      | -27.6                       | 0.4                |         | 0.5         | -29.8                         | -28.6                                                          | 3.3                           | 13.8                          |                       | 10.2           | -23.4             | 7.1             |         | -8.4                          | -16.8          | 18.4                          | -1.7            |         |         |                       |         |                       |                       |                       |         |         |         |         |                        |          |                        |          |                         |      |      |      |      |      |      |      |      |      |      |      |       |      |      |      |      |      |      |      |      |      |      |      |      |      |                       |      |       |      |      |       |       |       |       |       |       |       |        |       |       |       |       |       |       |       |       |       |       |       |       |       |       |      |       |      |      |      |      |       |      |      |      |       |      |      |      |      |      |       |      |      |      |       |      |      |      |      |          |    |    |    |    |       |    |  |    |    |                  |  |    |                               |                    |                               |                               |  |                |                   |                 |  |                               |                |                               |                 |           |      |  |       |      |      |       |  |       |       |     |  |     |       |       |     |      |  |      |       |     |  |      |       |      |      |

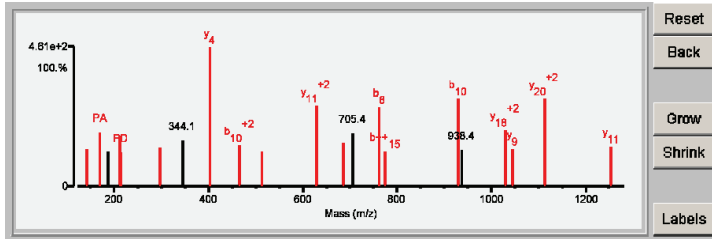

Result Summary

| Rank | Score | SPI (%) | BCS | # Unmatched Ions | Variable sites | Sequence              | MH <sup>+</sup> Calculated (Da) | MH <sup>+</sup> Error (Da) | MH <sup>+</sup> Error (ppm) | Protein MW/pI (Da) | Species | Accession # | Protein Name                                                               |
|------|-------|---------|-----|------------------|----------------|-----------------------|---------------------------------|----------------------------|-----------------------------|--------------------|---------|-------------|----------------------------------------------------------------------------|
| 1    | 19.56 | 82.5    | 8   | 5/25             | K38k           | (K)DIEDVFKYGAIK(D)    | 1588.8006                       | 114.0552                   | 7.2                         | 27744.7/10.37      | HUMAN   | Q07955      | Splicing factor, arginine/serine-rich 1 OS=Homo sapiens GN=SFRS1 PE=1 SV=2 |
| 2    | 7.83  | 51.1    | 4   | 13/25            | None           | (R)EVDIMLDDEVENQLR(Q) | 1702.8316                       | 0.0241                     | 14.2                        | 223146.6/5.58      | HUMAN   | RP12882     | REVERSE Myosin-1 OS=Homo sapiens GN=MYH1 PE=1 SV=3                         |
| 2    | 7.83  | 51.1    | 4   | 13/25            | None           | (R)EVDIMLDDEVENQLR(Q) | 1702.8316                       | 0.0241                     | 14.2                        | 223072.6/5.65      | HUMAN   | RQ9Y623     | REVERSE Myosin-4 OS=Homo sapiens GN=MYH4 PE=1 SV=2                         |
| 2    | 7.83  | 51.1    | 4   | 13/25            | None           | (R)EVDIMLDDEVENQLR(Q) | 1702.8316                       | 0.0241                     | 14.2                        | 223045.6/5.64      | HUMAN   | RQ9UKX2     | REVERSE Myosin-2 OS=Homo sapiens GN=MYH2 PE=1 SV=1                         |
| 2    | 7.83  | 51.1    | 4   | 13/25            | None           | (R)EVDIMLDDEVENQLR(Q) | 1702.8316                       | 0.0241                     | 14.2                        | 222763.6/5.58      | HUMAN   | RP13535     | REVERSE Myosin-8 OS=Homo sapiens GN=MYH8 PE=1 SV=3                         |

Detailed Results

| Rank | Score | SPI (%) | BCS | # Unmatched Ions | Variable sites | Sequence           | MH <sup>+</sup> Calculated (Da) | MH <sup>+</sup> Error (Da) | MH <sup>+</sup> Error (ppm) | Protein MW/pI (Da) | Species | Accession # | MS-Digest Index # | Protein Name                                                               |
|------|-------|---------|-----|------------------|----------------|--------------------|---------------------------------|----------------------------|-----------------------------|--------------------|---------|-------------|-------------------|----------------------------------------------------------------------------|
| 1    | 19.56 | 82.5    | 8   | 5/25             | K38k           | (K)DIEDVFKYGAIK(D) | 1588.8006                       | 114.0552                   | 7.2                         | 27744.7/10.37      | HUMAN   | Q07955      | 717611            | Splicing factor, arginine/serine-rich 1 OS=Homo sapiens GN=SFRS1 PE=1 SV=2 |

  

| Fragment-ion (m/z)     | 72.080 | 84.080 | 86.096 | 88.038 | 120.080 | 136.075 | 141.102 | 156.102 | 175.118 | 183.113 | 201.122 | 202.127 | 229.118 | 245.075 | 344.146 | 411.234*2        | 416.262 | 473.197 | 492.768*2        | 579.324 | 728.884*2             | 737.870*2         | 821.468 | 984.534 | 1131.594 |
|------------------------|--------|--------|--------|--------|---------|---------|---------|---------|---------|---------|---------|---------|---------|---------|---------|------------------|---------|---------|------------------|---------|-----------------------|-------------------|---------|---------|----------|
| Frac. Inten.(% of TIC) | 0.14   | 6.82   | 0.21   | 1.48   | 0.18    | 0.12    | 2.98    | 3.19    | 3.04    | 1.54    | 26.62   | 2.97    | 1.74    | 4.48    | 2.28    | 2.47             | 7.78    | 1.68    | 2.57             | 10.88   | 1.69                  | 2.77              | 3.61    | 5.46    | 3.31     |
| Rel. Inten.(% of BP)   | 0.51   | 25.63  | 0.79   | 5.55   | 0.68    | 0.44    | 11.20   | 11.97   | 11.43   | 5.80    | 100.00  | 11.17   | 6.52    | 16.82   | 8.56    | 9.26             | 29.21   | 6.30    | 9.64             | 40.87   | 6.33                  | 10.39             | 13.58   | 20.52   | 12.44    |
| Score                  | 0.50   | -0.26  | 0.22   | 0.50   | 1.00    | 1.00    | -0.11   | -0.12   | 1.50    | -0.06   | 0.50    | -0.11   | 0.50    | 0.75    | 0.75    | 1.50             | 1.50    | 0.50    | 1.50             | 1.50    | 0.50                  | 1.50              | 1.50    | 1.50    | 1.50     |
| Ion-type               | V      |        | LI     | a1     | F       | Y       |         |         | y1      |         |         |         | b2      | ED      | EDV     | y6 <sup>+2</sup> | y4      | b4      | y7 <sup>+2</sup> | y5      | y11-H2O <sup>+2</sup> | y11 <sup>+2</sup> | y6      | y7      | y8       |
| Delta ppm              | -5.2   |        | -10.8  | -22.7  | -10.6   | -6.5    |         |         | -7.7    |         |         |         | -14.3   |         |         | -3.3             | 1.9     | 16.7    | 2.4              | -1.8    | 26.6                  | -0.1              | 5.9     | 8.4     | -0.1     |

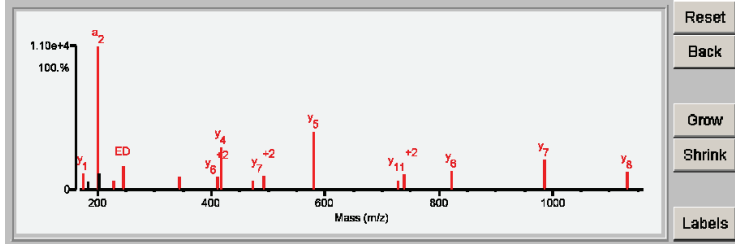

Reset

Back

Grow

Shrink

Labels

Result Summary

| Rank | Score | SPI (%) | BCS | # Unmatched Ions | Variable sites | Sequence                                       | MH <sup>+</sup> Calculated (Da) | MH <sup>+</sup> Error (Da) | MH <sup>+</sup> Error (ppm) | Protein MW/pl (Da) | Species | Accession # | Protein Name                                                                   |
|------|-------|---------|-----|------------------|----------------|------------------------------------------------|---------------------------------|----------------------------|-----------------------------|--------------------|---------|-------------|--------------------------------------------------------------------------------|
| 1    | 15.16 | 83.5    | 7   | 5/25             | K330k          | (K)YGE <b>P</b> GEV <b>F</b> IN <b>K</b> GK(G) | 1437.7373                       | 114.0568                   | 8.9                         | 76149.8/9.45       | HUMAN   | P23246      | Splicing factor, proline- and glutamine-rich OS=Homo sapiens GN=SFPQ PE=1 SV=2 |
| 2    | 14.11 | 80.2    | 7   | 6/25             | K332k          | (K)YGE <b>P</b> GEV <b>F</b> IN <b>K</b> GK(G) | 1437.7373                       | 114.0568                   | 8.9                         | 76149.8/9.45       | HUMAN   | P23246      | Splicing factor, proline- and glutamine-rich OS=Homo sapiens GN=SFPQ PE=1 SV=2 |

Detailed Results

| Rank | Score | SPI (%) | BCS | # Unmatched Ions | Variable sites | Sequence                                       | MH <sup>+</sup> Calculated (Da) | MH <sup>+</sup> Error (Da) | MH <sup>+</sup> Error (ppm) | Protein MW/pl (Da) | Species | Accession # | MS-Digest Index # | Protein Name                                                                   |
|------|-------|---------|-----|------------------|----------------|------------------------------------------------|---------------------------------|----------------------------|-----------------------------|--------------------|---------|-------------|-------------------|--------------------------------------------------------------------------------|
| 1    | 15.16 | 83.5    | 7   | 5/25             | K330k          | (K)Y G \ E / P G E \ V / F / I / N / k G K (G) | 1437.7373                       | 114.0568                   | 8.9                         | 76149.8/9.45       | HUMAN   | P23246      | 717515            | Splicing factor, proline- and glutamine-rich OS=Homo sapiens GN=SFPQ PE=1 SV=2 |

  

| Fragment-ion (m/z)      | 70.065 | 72.081 | 84.080 | 86.097 | 120.080 | 129.101 | 136.075 | 155.082 | 221.094 | 233.164 | 284.124 | 339.183 | 357.188 | 383.193 | 401.181 | 446.272 | 502.249 | 543.283 | 560.319 | 601.819*2 | 633.255 | 673.401 | 683.362 | 732.327 | 820.467 |
|-------------------------|--------|--------|--------|--------|---------|---------|---------|---------|---------|---------|---------|---------|---------|---------|---------|---------|---------|---------|---------|-----------|---------|---------|---------|---------|---------|
| Frac. Inten. (% of TIC) | 0.00   | 0.36   | 0.53   | 0.51   | 0.87    | 0.17    | 0.48    | 4.80    | 5.00    | 3.45    | 10.25   | 2.89    | 3.38    | 6.89    | 4.22    | 6.14    | 2.86    | 4.72    | 11.23   | 4.61      | 4.10    | 9.08    | 3.04    | 2.98    | 7.44    |
| Rel. Inten. (% of BP)   | 0.00   | 3.21   | 4.67   | 4.57   | 7.75    | 1.49    | 4.24    | 42.76   | 44.54   | 30.67   | 91.24   | 25.76   | 30.12   | 61.31   | 37.53   | 54.61   | 25.42   | 42.02   | 100.00  | 41.06     | 36.47   | 80.87   | 27.10   | 26.54   | 66.23   |
| Score                   | 0.20   | 0.50   | 0.50   | 0.22   | 1.00    | 0.20    | 1.00    | 0.75    | 0.50    | -0.31   | 0.75    | -0.26   | 0.75    | 0.75    | -0.38   | 1.50    | -0.25   | 0.50    | 1.50    | 0.50      | 1.50    | 1.50    | -0.27   | 0.50    | 1.50    |
| Ion-type                | PR     | V      | KQ     | LI     | F       | RKQ     | a1      | PG      | b2      | PGE     | Nk      | PGEV    | y3      | y4-NH3  | y4      | y10+2   | y4      | y4      | y4      | y10+2     | b6      | y5      | b7      | y6      | y6      |
| Delta ppm               | 2.5    | -2.4   | -11.6  | 2.0    | -4.8    | -6.5    | -10.9   | -5.2    | 2.9     | -5.6    | -4.5    | -2.4    | 0.1     | -10.0   | 6.8     | -17.7   | 3.5     | 3.3     | 7.5     | -0.7      |         |         |         |         |         |

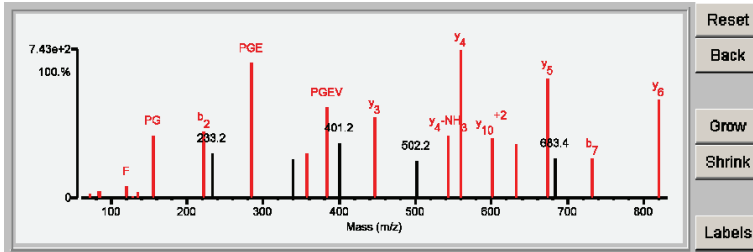



Result Summary

| Rank | Score | SPI (%) | BCS | # Unmatched Ions | Variable sites | Sequence               | MH <sup>+</sup> Calculated (Da) | MH <sup>+</sup> Error (Da) | MH <sup>+</sup> Error (ppm) | Protein MW/pt (Da) | Species | Accession # | Protein Name                                                       |
|------|-------|---------|-----|------------------|----------------|------------------------|---------------------------------|----------------------------|-----------------------------|--------------------|---------|-------------|--------------------------------------------------------------------|
| 1    | 17.06 | 60.4    | 10  | 6/25             | K154k          | (R)EALLSSAVDHGSDEVK(Q) | 1959.9770                       | 114.0659                   | 11.1                        | 57488.5/6.01       | HUMAN   | P78371      | T-complex protein 1 subunit beta OS=Homo sapiens GN=CCT2 PE=1 SV=4 |

Detailed Results

| Rank                    | Score  | SPI (%) | BCS    | # Unmatched Ions | Variable sites | Sequence               | MH <sup>+</sup> Calculated (Da) | MH <sup>+</sup> Error (Da) | MH <sup>+</sup> Error (ppm) | Protein MW/pt (Da) | Species | Accession # | MS-Digest Index # | Protein Name                                                       |         |         |                       |                       |                       |         |                   |                       |         |                       |          |
|-------------------------|--------|---------|--------|------------------|----------------|------------------------|---------------------------------|----------------------------|-----------------------------|--------------------|---------|-------------|-------------------|--------------------------------------------------------------------|---------|---------|-----------------------|-----------------------|-----------------------|---------|-------------------|-----------------------|---------|-----------------------|----------|
| 1                       | 17.06  | 60.4    | 10     | 6/25             | K154k          | (R)EALLSSAVDHGSDEVK(Q) | 1959.9770                       | 114.0659                   | 11.1                        | 57488.5/6.01       | HUMAN   | P78371      | 772107            | T-complex protein 1 subunit beta OS=Homo sapiens GN=CCT2 PE=1 SV=4 |         |         |                       |                       |                       |         |                   |                       |         |                       |          |
| Fragment-ion (m/z)      | 70.065 | 72.081  | 84.043 | 84.080           | 86.095         | 87.055                 | 102.054                         | 110.071                    | 120.082                     | 157.129            | 175.115 | 199.179     | 201.088           | 296.160                                                            | 322.190 | 564.323 | 565.326 <sup>+2</sup> | 594.801 <sup>+2</sup> | 652.805 <sup>+2</sup> | 663.394 | 701.843           | 737.366 <sup>+2</sup> | 781.398 | 824.393 <sup>+2</sup> | 1051.521 |
| Frac. Inten. (% of TIC) | 0.00   | 0.46    | 0.28   | 20.31            | 1.93           | 0.16                   | 0.19                            | 0.32                       | 0.12                        | 5.03               | 5.34    | 3.31        | 4.60              | 3.31                                                               | 8.45    | 7.86    | 4.40                  | 5.42                  | 3.26                  | 3.65    | 3.48              | 6.22                  | 3.29    | 4.48                  | 4.14     |
| Rel. Inten. (% of BP)   | 0.02   | 2.26    | 1.36   | 100.00           | 9.52           | 0.80                   | 0.93                            | 1.55                       | 0.58                        | 24.75              | 26.29   | 16.27       | 22.66             | 16.29                                                              | 41.60   | 38.67   | 21.66                 | 26.70                 | 16.07                 | 17.96   | 17.13             | 30.60                 | 16.18   | 22.07                 | 20.38    |
| Score                   | 0.20   | 0.50    | 1.00   | -1.00            | 0.22           | 0.33                   | 1.00                            | 1.00                       | 1.00                        | -0.25              | 1.50    | -0.16       | 0.50              | 0.25                                                               | 1.50    | 1.50    | -0.22                 | 1.50                  | -0.16                 | 1.50    | 1.50              | 1.50                  | -0.16   | 1.50                  | 1.50     |
| Ion-type                | PR     | V       | E      |                  | LI             | NR                     | a1                              | H                          | F                           |                    | y1      |             | b2                | b3-H <sub>2</sub> O                                                | y2      | y3      |                       | y9 <sup>+2</sup>      |                       | y4      | y <sup>++11</sup> | y12 <sup>+2</sup>     |         | y14 <sup>+2</sup>     | y8       |
| Delta ppm               | -1.8   | -2.4    | -11.8  |                  | -13.1          | -3.3                   | -16.2                           | -2.5                       | 11.9                        |                    | -24.9   |             | -1.9              | -6.0                                                               | 8.8     | -3.8    |                       | 16.6                  |                       | 0.8     | 6.0               | 13.9                  |         | 3.8                   | 3.6      |

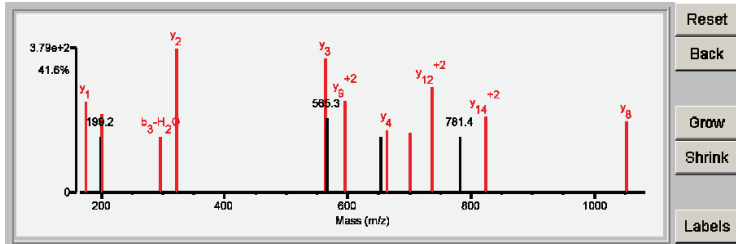

Result Summary

| Rank | Score | SPI (%) | BCS | # Unmatched Ions | Variable sites | Sequence                               | MH <sup>+</sup> Calculated (Da) | MH <sup>+</sup> Error (Da) | MH <sup>+</sup> Error (ppm) | Protein MW/pI (Da) | Species | Accession #            | Protein Name                                                                |
|------|-------|---------|-----|------------------|----------------|----------------------------------------|---------------------------------|----------------------------|-----------------------------|--------------------|---------|------------------------|-----------------------------------------------------------------------------|
| 1    | 15.58 | 78.2    | 7   | 7/25             | K275k          | (K) <u>L</u> DVTSVEDY <u>k</u> ALQK(Y) | 1608.8479                       | 114.0664                   | 13.6                        | 59671.4/5.45       | HUMAN   | <a href="#">P48643</a> | T-complex protein 1 subunit epsilon OS=Homo sapiens GN=CCT5 PE=1 SV=1       |
| 2    | 12.23 | 71.2    | 5   | 9/25             | K279k          | (K) <u>L</u> DVTSVEDY <u>k</u> ALQK(Y) | 1608.8479                       | 114.0664                   | 13.6                        | 59671.4/5.45       | HUMAN   | <a href="#">P48643</a> | T-complex protein 1 subunit epsilon OS=Homo sapiens GN=CCT5 PE=1 SV=1       |
| 3    | 3.28  | 52.4    | 1   | 11/25            | K797k          | (R) <u>k</u> FIVDGVESVTTSK(I)          | 1608.8843                       | 114.0300                   | -7.5                        | 142695.6/5.09      | HUMAN   | <a href="#">Q9H2G2</a> | STE20-like serine/threonine-protein kinase OS=Homo sapiens GN=SLK PE=1 SV=1 |

Detailed Results

| Rank                                                                                                                                                                                                                                                                                                                                                                                                                                                                                                                                                                                                                                                                                                                                                                                                                                                                                                                                                                                                                                                                                                                                                                                                                                                                                                                                                                                                                                                                                                                                                                                                                                                                                                                                                                                                                                                                                                                                                                                                                                                                                                                                                                                                                                                                                                                                                                                                                                                                                                                                                                                       | Score  | SPI (%) | BCS    | # Unmatched Ions | Variable sites | Sequence                              | MH <sup>+</sup> Calculated (Da) | MH <sup>+</sup> Error (Da) | MH <sup>+</sup> Error (ppm) | Protein MW/pI (Da)  | Species | Accession #            | MS-Digest Index #      | Protein Name                                                          |                    |         |                       |         |         |                       |         |                       |                       |                   |          |         |         |         |         |         |         |                       |         |         |                       |         |                       |                       |         |          |                         |      |      |       |      |      |      |      |      |      |      |      |      |      |      |      |      |      |      |      |      |      |      |      |      |      |                       |      |      |        |       |       |      |       |       |       |       |       |       |       |       |       |       |       |       |       |       |       |       |       |       |       |       |      |      |      |       |       |      |      |      |      |      |      |      |       |      |      |       |       |       |      |       |      |      |      |      |      |          |   |    |    |  |  |     |    |       |       |                     |    |    |  |    |    |  |  |  |    |  |  |    |                   |                   |    |           |      |     |      |      |     |     |       |      |     |      |       |       |       |     |     |    |  |  |      |  |     |      |     |      |     |
|--------------------------------------------------------------------------------------------------------------------------------------------------------------------------------------------------------------------------------------------------------------------------------------------------------------------------------------------------------------------------------------------------------------------------------------------------------------------------------------------------------------------------------------------------------------------------------------------------------------------------------------------------------------------------------------------------------------------------------------------------------------------------------------------------------------------------------------------------------------------------------------------------------------------------------------------------------------------------------------------------------------------------------------------------------------------------------------------------------------------------------------------------------------------------------------------------------------------------------------------------------------------------------------------------------------------------------------------------------------------------------------------------------------------------------------------------------------------------------------------------------------------------------------------------------------------------------------------------------------------------------------------------------------------------------------------------------------------------------------------------------------------------------------------------------------------------------------------------------------------------------------------------------------------------------------------------------------------------------------------------------------------------------------------------------------------------------------------------------------------------------------------------------------------------------------------------------------------------------------------------------------------------------------------------------------------------------------------------------------------------------------------------------------------------------------------------------------------------------------------------------------------------------------------------------------------------------------------|--------|---------|--------|------------------|----------------|---------------------------------------|---------------------------------|----------------------------|-----------------------------|---------------------|---------|------------------------|------------------------|-----------------------------------------------------------------------|--------------------|---------|-----------------------|---------|---------|-----------------------|---------|-----------------------|-----------------------|-------------------|----------|---------|---------|---------|---------|---------|---------|-----------------------|---------|---------|-----------------------|---------|-----------------------|-----------------------|---------|----------|-------------------------|------|------|-------|------|------|------|------|------|------|------|------|------|------|------|------|------|------|------|------|------|------|------|------|------|------|-----------------------|------|------|--------|-------|-------|------|-------|-------|-------|-------|-------|-------|-------|-------|-------|-------|-------|-------|-------|-------|-------|-------|-------|-------|-------|-------|------|------|------|-------|-------|------|------|------|------|------|------|------|-------|------|------|-------|-------|-------|------|-------|------|------|------|------|------|----------|---|----|----|--|--|-----|----|-------|-------|---------------------|----|----|--|----|----|--|--|--|----|--|--|----|-------------------|-------------------|----|-----------|------|-----|------|------|-----|-----|-------|------|-----|------|-------|-------|-------|-----|-----|----|--|--|------|--|-----|------|-----|------|-----|
| 1                                                                                                                                                                                                                                                                                                                                                                                                                                                                                                                                                                                                                                                                                                                                                                                                                                                                                                                                                                                                                                                                                                                                                                                                                                                                                                                                                                                                                                                                                                                                                                                                                                                                                                                                                                                                                                                                                                                                                                                                                                                                                                                                                                                                                                                                                                                                                                                                                                                                                                                                                                                          | 15.58  | 78.2    | 7      | 7/25             | K275k          | (K) L/D I/V T S V/E/D Y/K/A L Q/K (Y) | 1608.8479                       | 114.0664                   | 13.6                        | 59671.4/5.45        | HUMAN   | <a href="#">P48643</a> | <a href="#">772167</a> | T-complex protein 1 subunit epsilon OS=Homo sapiens GN=CCT5 PE=1 SV=1 |                    |         |                       |         |         |                       |         |                       |                       |                   |          |         |         |         |         |         |         |                       |         |         |                       |         |                       |                       |         |          |                         |      |      |       |      |      |      |      |      |      |      |      |      |      |      |      |      |      |      |      |      |      |      |      |      |      |                       |      |      |        |       |       |      |       |       |       |       |       |       |       |       |       |       |       |       |       |       |       |       |       |       |       |       |      |      |      |       |       |      |      |      |      |      |      |      |       |      |      |       |       |       |      |       |      |      |      |      |      |          |   |    |    |  |  |     |    |       |       |                     |    |    |  |    |    |  |  |  |    |  |  |    |                   |                   |    |           |      |     |      |      |     |     |       |      |     |      |       |       |       |     |     |    |  |  |      |  |     |      |     |      |     |
| <table border="1"> <thead> <tr> <th>Fragment-ion (m/z)</th> <th>72.081</th> <th>84.081</th> <th>86.097</th> <th>87.099</th> <th>120.083</th> <th>129.103</th> <th>147.108</th> <th>159.113</th> <th>173.130</th> <th>183.114</th> <th>187.104</th> <th>201.121</th> <th>202.123</th> <th>215.105</th> <th>229.119</th> <th>270.146</th> <th>367.168<sup>+2</sup></th> <th>384.233</th> <th>459.301</th> <th>492.771<sup>+2</sup></th> <th>701.437</th> <th>747.919<sup>+2</sup></th> <th>805.410<sup>+2</sup></th> <th>979.519</th> <th>1108.565</th> </tr> </thead> <tbody> <tr> <td>Frac. Inten. (% of TIC)</td> <td>0.85</td> <td>0.20</td> <td>19.51</td> <td>2.77</td> <td>3.62</td> <td>0.08</td> <td>2.82</td> <td>5.83</td> <td>2.52</td> <td>4.70</td> <td>3.30</td> <td>6.84</td> <td>3.00</td> <td>4.41</td> <td>5.09</td> <td>3.15</td> <td>2.58</td> <td>3.32</td> <td>4.15</td> <td>3.34</td> <td>3.70</td> <td>3.06</td> <td>4.79</td> <td>3.52</td> <td>2.85</td> </tr> <tr> <td>Rel. Inten. (% of BP)</td> <td>4.34</td> <td>1.03</td> <td>100.00</td> <td>14.22</td> <td>18.58</td> <td>0.41</td> <td>14.47</td> <td>29.91</td> <td>12.93</td> <td>24.08</td> <td>16.93</td> <td>35.04</td> <td>15.37</td> <td>22.62</td> <td>26.09</td> <td>16.13</td> <td>13.23</td> <td>17.02</td> <td>21.29</td> <td>17.11</td> <td>18.97</td> <td>15.66</td> <td>24.56</td> <td>18.03</td> <td>14.60</td> </tr> <tr> <td>Score</td> <td>0.50</td> <td>0.50</td> <td>0.50</td> <td>-0.14</td> <td>-0.19</td> <td>0.20</td> <td>1.50</td> <td>0.50</td> <td>0.50</td> <td>0.50</td> <td>0.75</td> <td>0.75</td> <td>-0.15</td> <td>0.75</td> <td>0.75</td> <td>-0.16</td> <td>-0.13</td> <td>-0.17</td> <td>1.50</td> <td>-0.17</td> <td>1.50</td> <td>1.50</td> <td>1.50</td> <td>1.50</td> <td>1.50</td> </tr> <tr> <td>Ion-type</td> <td>V</td> <td>KQ</td> <td>a1</td> <td></td> <td></td> <td>RKQ</td> <td>y1</td> <td>SV-28</td> <td>VT-28</td> <td>VT-H<sub>2</sub>O</td> <td>SV</td> <td>a2</td> <td></td> <td>DV</td> <td>b2</td> <td></td> <td></td> <td></td> <td>y4</td> <td></td> <td></td> <td>y5</td> <td>y12<sup>+2</sup></td> <td>y13<sup>+2</sup></td> <td>y7</td> </tr> <tr> <td>Delta ppm</td> <td>-1.0</td> <td>5.0</td> <td>-9.6</td> <td>0.50</td> <td>3.2</td> <td>5.1</td> <td>-30.6</td> <td>-4.4</td> <td>4.9</td> <td>-0.6</td> <td>-26.3</td> <td>-19.2</td> <td>-26.3</td> <td>5.4</td> <td>0.5</td> <td>VE</td> <td></td> <td></td> <td>18.2</td> <td></td> <td>9.5</td> <td>34.3</td> <td>4.3</td> <td>-1.5</td> <td>2.0</td> </tr> </tbody> </table> |        |         |        |                  |                |                                       |                                 |                            |                             |                     |         |                        |                        |                                                                       | Fragment-ion (m/z) | 72.081  | 84.081                | 86.097  | 87.099  | 120.083               | 129.103 | 147.108               | 159.113               | 173.130           | 183.114  | 187.104 | 201.121 | 202.123 | 215.105 | 229.119 | 270.146 | 367.168 <sup>+2</sup> | 384.233 | 459.301 | 492.771 <sup>+2</sup> | 701.437 | 747.919 <sup>+2</sup> | 805.410 <sup>+2</sup> | 979.519 | 1108.565 | Frac. Inten. (% of TIC) | 0.85 | 0.20 | 19.51 | 2.77 | 3.62 | 0.08 | 2.82 | 5.83 | 2.52 | 4.70 | 3.30 | 6.84 | 3.00 | 4.41 | 5.09 | 3.15 | 2.58 | 3.32 | 4.15 | 3.34 | 3.70 | 3.06 | 4.79 | 3.52 | 2.85 | Rel. Inten. (% of BP) | 4.34 | 1.03 | 100.00 | 14.22 | 18.58 | 0.41 | 14.47 | 29.91 | 12.93 | 24.08 | 16.93 | 35.04 | 15.37 | 22.62 | 26.09 | 16.13 | 13.23 | 17.02 | 21.29 | 17.11 | 18.97 | 15.66 | 24.56 | 18.03 | 14.60 | Score | 0.50 | 0.50 | 0.50 | -0.14 | -0.19 | 0.20 | 1.50 | 0.50 | 0.50 | 0.50 | 0.75 | 0.75 | -0.15 | 0.75 | 0.75 | -0.16 | -0.13 | -0.17 | 1.50 | -0.17 | 1.50 | 1.50 | 1.50 | 1.50 | 1.50 | Ion-type | V | KQ | a1 |  |  | RKQ | y1 | SV-28 | VT-28 | VT-H <sub>2</sub> O | SV | a2 |  | DV | b2 |  |  |  | y4 |  |  | y5 | y12 <sup>+2</sup> | y13 <sup>+2</sup> | y7 | Delta ppm | -1.0 | 5.0 | -9.6 | 0.50 | 3.2 | 5.1 | -30.6 | -4.4 | 4.9 | -0.6 | -26.3 | -19.2 | -26.3 | 5.4 | 0.5 | VE |  |  | 18.2 |  | 9.5 | 34.3 | 4.3 | -1.5 | 2.0 |
| Fragment-ion (m/z)                                                                                                                                                                                                                                                                                                                                                                                                                                                                                                                                                                                                                                                                                                                                                                                                                                                                                                                                                                                                                                                                                                                                                                                                                                                                                                                                                                                                                                                                                                                                                                                                                                                                                                                                                                                                                                                                                                                                                                                                                                                                                                                                                                                                                                                                                                                                                                                                                                                                                                                                                                         | 72.081 | 84.081  | 86.097 | 87.099           | 120.083        | 129.103                               | 147.108                         | 159.113                    | 173.130                     | 183.114             | 187.104 | 201.121                | 202.123                | 215.105                                                               | 229.119            | 270.146 | 367.168 <sup>+2</sup> | 384.233 | 459.301 | 492.771 <sup>+2</sup> | 701.437 | 747.919 <sup>+2</sup> | 805.410 <sup>+2</sup> | 979.519           | 1108.565 |         |         |         |         |         |         |                       |         |         |                       |         |                       |                       |         |          |                         |      |      |       |      |      |      |      |      |      |      |      |      |      |      |      |      |      |      |      |      |      |      |      |      |      |                       |      |      |        |       |       |      |       |       |       |       |       |       |       |       |       |       |       |       |       |       |       |       |       |       |       |       |      |      |      |       |       |      |      |      |      |      |      |      |       |      |      |       |       |       |      |       |      |      |      |      |      |          |   |    |    |  |  |     |    |       |       |                     |    |    |  |    |    |  |  |  |    |  |  |    |                   |                   |    |           |      |     |      |      |     |     |       |      |     |      |       |       |       |     |     |    |  |  |      |  |     |      |     |      |     |
| Frac. Inten. (% of TIC)                                                                                                                                                                                                                                                                                                                                                                                                                                                                                                                                                                                                                                                                                                                                                                                                                                                                                                                                                                                                                                                                                                                                                                                                                                                                                                                                                                                                                                                                                                                                                                                                                                                                                                                                                                                                                                                                                                                                                                                                                                                                                                                                                                                                                                                                                                                                                                                                                                                                                                                                                                    | 0.85   | 0.20    | 19.51  | 2.77             | 3.62           | 0.08                                  | 2.82                            | 5.83                       | 2.52                        | 4.70                | 3.30    | 6.84                   | 3.00                   | 4.41                                                                  | 5.09               | 3.15    | 2.58                  | 3.32    | 4.15    | 3.34                  | 3.70    | 3.06                  | 4.79                  | 3.52              | 2.85     |         |         |         |         |         |         |                       |         |         |                       |         |                       |                       |         |          |                         |      |      |       |      |      |      |      |      |      |      |      |      |      |      |      |      |      |      |      |      |      |      |      |      |      |                       |      |      |        |       |       |      |       |       |       |       |       |       |       |       |       |       |       |       |       |       |       |       |       |       |       |       |      |      |      |       |       |      |      |      |      |      |      |      |       |      |      |       |       |       |      |       |      |      |      |      |      |          |   |    |    |  |  |     |    |       |       |                     |    |    |  |    |    |  |  |  |    |  |  |    |                   |                   |    |           |      |     |      |      |     |     |       |      |     |      |       |       |       |     |     |    |  |  |      |  |     |      |     |      |     |
| Rel. Inten. (% of BP)                                                                                                                                                                                                                                                                                                                                                                                                                                                                                                                                                                                                                                                                                                                                                                                                                                                                                                                                                                                                                                                                                                                                                                                                                                                                                                                                                                                                                                                                                                                                                                                                                                                                                                                                                                                                                                                                                                                                                                                                                                                                                                                                                                                                                                                                                                                                                                                                                                                                                                                                                                      | 4.34   | 1.03    | 100.00 | 14.22            | 18.58          | 0.41                                  | 14.47                           | 29.91                      | 12.93                       | 24.08               | 16.93   | 35.04                  | 15.37                  | 22.62                                                                 | 26.09              | 16.13   | 13.23                 | 17.02   | 21.29   | 17.11                 | 18.97   | 15.66                 | 24.56                 | 18.03             | 14.60    |         |         |         |         |         |         |                       |         |         |                       |         |                       |                       |         |          |                         |      |      |       |      |      |      |      |      |      |      |      |      |      |      |      |      |      |      |      |      |      |      |      |      |      |                       |      |      |        |       |       |      |       |       |       |       |       |       |       |       |       |       |       |       |       |       |       |       |       |       |       |       |      |      |      |       |       |      |      |      |      |      |      |      |       |      |      |       |       |       |      |       |      |      |      |      |      |          |   |    |    |  |  |     |    |       |       |                     |    |    |  |    |    |  |  |  |    |  |  |    |                   |                   |    |           |      |     |      |      |     |     |       |      |     |      |       |       |       |     |     |    |  |  |      |  |     |      |     |      |     |
| Score                                                                                                                                                                                                                                                                                                                                                                                                                                                                                                                                                                                                                                                                                                                                                                                                                                                                                                                                                                                                                                                                                                                                                                                                                                                                                                                                                                                                                                                                                                                                                                                                                                                                                                                                                                                                                                                                                                                                                                                                                                                                                                                                                                                                                                                                                                                                                                                                                                                                                                                                                                                      | 0.50   | 0.50    | 0.50   | -0.14            | -0.19          | 0.20                                  | 1.50                            | 0.50                       | 0.50                        | 0.50                | 0.75    | 0.75                   | -0.15                  | 0.75                                                                  | 0.75               | -0.16   | -0.13                 | -0.17   | 1.50    | -0.17                 | 1.50    | 1.50                  | 1.50                  | 1.50              | 1.50     |         |         |         |         |         |         |                       |         |         |                       |         |                       |                       |         |          |                         |      |      |       |      |      |      |      |      |      |      |      |      |      |      |      |      |      |      |      |      |      |      |      |      |      |                       |      |      |        |       |       |      |       |       |       |       |       |       |       |       |       |       |       |       |       |       |       |       |       |       |       |       |      |      |      |       |       |      |      |      |      |      |      |      |       |      |      |       |       |       |      |       |      |      |      |      |      |          |   |    |    |  |  |     |    |       |       |                     |    |    |  |    |    |  |  |  |    |  |  |    |                   |                   |    |           |      |     |      |      |     |     |       |      |     |      |       |       |       |     |     |    |  |  |      |  |     |      |     |      |     |
| Ion-type                                                                                                                                                                                                                                                                                                                                                                                                                                                                                                                                                                                                                                                                                                                                                                                                                                                                                                                                                                                                                                                                                                                                                                                                                                                                                                                                                                                                                                                                                                                                                                                                                                                                                                                                                                                                                                                                                                                                                                                                                                                                                                                                                                                                                                                                                                                                                                                                                                                                                                                                                                                   | V      | KQ      | a1     |                  |                | RKQ                                   | y1                              | SV-28                      | VT-28                       | VT-H <sub>2</sub> O | SV      | a2                     |                        | DV                                                                    | b2                 |         |                       |         | y4      |                       |         | y5                    | y12 <sup>+2</sup>     | y13 <sup>+2</sup> | y7       |         |         |         |         |         |         |                       |         |         |                       |         |                       |                       |         |          |                         |      |      |       |      |      |      |      |      |      |      |      |      |      |      |      |      |      |      |      |      |      |      |      |      |      |                       |      |      |        |       |       |      |       |       |       |       |       |       |       |       |       |       |       |       |       |       |       |       |       |       |       |       |      |      |      |       |       |      |      |      |      |      |      |      |       |      |      |       |       |       |      |       |      |      |      |      |      |          |   |    |    |  |  |     |    |       |       |                     |    |    |  |    |    |  |  |  |    |  |  |    |                   |                   |    |           |      |     |      |      |     |     |       |      |     |      |       |       |       |     |     |    |  |  |      |  |     |      |     |      |     |
| Delta ppm                                                                                                                                                                                                                                                                                                                                                                                                                                                                                                                                                                                                                                                                                                                                                                                                                                                                                                                                                                                                                                                                                                                                                                                                                                                                                                                                                                                                                                                                                                                                                                                                                                                                                                                                                                                                                                                                                                                                                                                                                                                                                                                                                                                                                                                                                                                                                                                                                                                                                                                                                                                  | -1.0   | 5.0     | -9.6   | 0.50             | 3.2            | 5.1                                   | -30.6                           | -4.4                       | 4.9                         | -0.6                | -26.3   | -19.2                  | -26.3                  | 5.4                                                                   | 0.5                | VE      |                       |         | 18.2    |                       | 9.5     | 34.3                  | 4.3                   | -1.5              | 2.0      |         |         |         |         |         |         |                       |         |         |                       |         |                       |                       |         |          |                         |      |      |       |      |      |      |      |      |      |      |      |      |      |      |      |      |      |      |      |      |      |      |      |      |      |                       |      |      |        |       |       |      |       |       |       |       |       |       |       |       |       |       |       |       |       |       |       |       |       |       |       |       |      |      |      |       |       |      |      |      |      |      |      |      |       |      |      |       |       |       |      |       |      |      |      |      |      |          |   |    |    |  |  |     |    |       |       |                     |    |    |  |    |    |  |  |  |    |  |  |    |                   |                   |    |           |      |     |      |      |     |     |       |      |     |      |       |       |       |     |     |    |  |  |      |  |     |      |     |      |     |

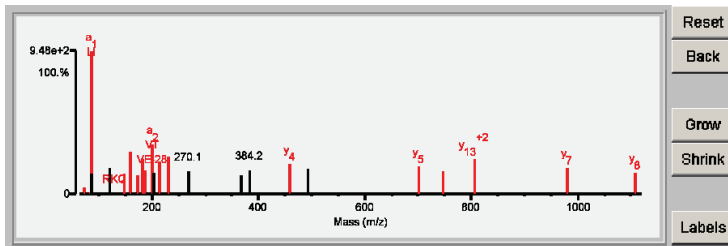

Result Summary

| Rank | Score | SPI (%) | BCS | # Unmatched Ions | Variable sites | Sequence           | MH <sup>+</sup> Calculated (Da) | MH <sup>+</sup> Error (Da) | MH <sup>+</sup> Error (ppm) | Protein MW/PI (Da) | Species | Accession # | Protein Name                                                        |
|------|-------|---------|-----|------------------|----------------|--------------------|---------------------------------|----------------------------|-----------------------------|--------------------|---------|-------------|---------------------------------------------------------------------|
| 1    | 12.32 | 72.9    | 6   | 11/25            | K249k          | (R)IVLLDSSLEYKk(G) | 1407.8094                       | 114.0573                   | 9.4                         | 60534.3/6.10       | HUMAN   | P49368      | T-complex protein 1 subunit gamma OS=Homo sapiens GN=CCT3 PE=1 SV=4 |
| 2    | 10.77 | 70.8    | 5   | 12/25            | K248k          | (R)IVLLDSSLEYKk(G) | 1407.8094                       | 114.0573                   | 9.4                         | 60534.3/6.10       | HUMAN   | P49368      | T-complex protein 1 subunit gamma OS=Homo sapiens GN=CCT3 PE=1 SV=4 |

Detailed Results

| Rank                    | Score  | SPI (%) | BCS    | # Unmatched Ions | Variable sites | Sequence             | MH <sup>+</sup> Calculated (Da) | MH <sup>+</sup> Error (Da) | MH <sup>+</sup> Error (ppm) | Protein MW/PI (Da) | Species | Accession # | MS-Digest Index # | Protein Name                                                        |         |         |         |                |         |         |                |                               |                |                |          |
|-------------------------|--------|---------|--------|------------------|----------------|----------------------|---------------------------------|----------------------------|-----------------------------|--------------------|---------|-------------|-------------------|---------------------------------------------------------------------|---------|---------|---------|----------------|---------|---------|----------------|-------------------------------|----------------|----------------|----------|
| 1                       | 12.32  | 72.9    | 6      | 11/25            | K249k          | (R)IVLLDSSLE/Y/Kk(G) | 1407.8094                       | 114.0573                   | 9.4                         | 60534.3/6.10       | HUMAN   | P49368      | 386098            | T-complex protein 1 subunit gamma OS=Homo sapiens GN=CCT3 PE=1 SV=4 |         |         |         |                |         |         |                |                               |                |                |          |
| Fragment-ion (m/z)      | 70.065 | 72.081  | 84.080 | 86.096           | 101.068        | 120.081              | 129.101                         | 136.076                    | 185.161                     | 199.180            | 213.158 | 261.153     | 270.146           | 271.134                                                             | 314.212 | 316.131 | 326.225 | 370.166        | 389.252 | 435.271 | 552.326        | 655.355 <sup>+2</sup>         | 681.363        | 1083.548       | 1560.702 |
| Frac. Inten. (% of TIC) | 0.14   | 0.20    | 0.34   | 43.13            | 0.08           | 3.28                 | 0.10                            | 0.06                       | 8.44                        | 2.67               | 5.15    | 2.14        | 2.43              | 3.83                                                                | 2.01    | 3.36    | 2.40    | 2.95           | 3.10    | 1.91    | 2.22           | 2.74                          | 3.02           | 2.17           | 2.13     |
| Rel. Inten. (% of BP)   | 0.32   | 0.46    | 0.79   | 100.00           | 0.19           | 7.59                 | 0.23                            | 0.14                       | 19.66                       | 6.19               | 11.93   | 4.96        | 5.64              | 8.87                                                                | 4.66    | 7.80    | 5.57    | 6.84           | 7.19    | 4.42    | 5.15           | 6.36                          | 6.99           | 5.04           | 4.95     |
| Score                   | -0.00  | 0.50    | 0.50   | 0.50             | -0.08          | 0.20                 | 1.00                            | 0.50                       | -0.06                       | 0.75               | 1.50    | -0.06       | -0.09             | -0.05                                                               | -0.08   | -0.06   | -0.07   | -0.07          | 1.50    | -0.04   | 1.50           | 1.50                          | 1.50           | 1.50           | -0.05    |
| Ion-type                |        | V       | KQ     | a <sub>1</sub>   | KQ             | RKQ                  | Y                               | a <sub>2</sub>             | b <sub>2</sub>              | y <sub>1</sub>     |         |             |                   |                                                                     |         |         |         | y <sub>2</sub> |         |         | y <sub>3</sub> | y <sub>10</sub> <sup>+2</sup> | y <sub>4</sub> | y <sub>8</sub> |          |
| Delta ppm               |        | 3.1     | -8.0   | -4.9             | 0.50           |                      | 2.3                             | -19.7                      | VL-28                       | -9.6               | -11.6   |             |                   |                                                                     |         |         |         | 3.6            |         |         | 21.3           | 1.9                           | 8.8            | 14.8           |          |

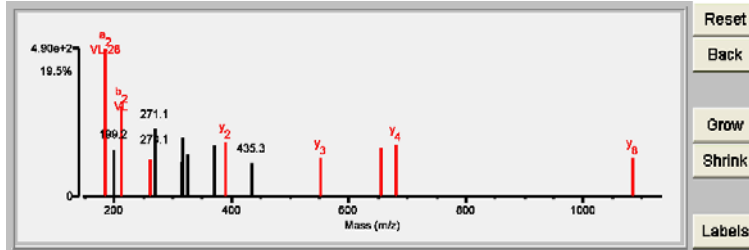

Reset  
 Back  
 Grow  
 Shrink  
 Labels

Result Summary

| Rank | Score | SPI (%) | BCS | # Unmatched Ions | Variable sites | Sequence                                                  | MH <sup>+</sup> Calculated (Da) | MH <sup>+</sup> Error (Da) | MH <sup>+</sup> Error (ppm) | Protein MW/pl (Da) | Species | Accession # | Protein Name                                                        |
|------|-------|---------|-----|------------------|----------------|-----------------------------------------------------------|---------------------------------|----------------------------|-----------------------------|--------------------|---------|-------------|---------------------------------------------------------------------|
| 1    | 19.07 | 82.0    | 12  | 6/25             | K507k          | (K) L Q I T Y K / T A / V / E / T / A / V / L / L / R (I) | 1819.0688                       | 114.0526                   | 5.0                         | 60534.3/6.10       | HUMAN   | P49368      | T-complex protein 1 subunit gamma OS=Homo sapiens GN=CCT3 PE=1 SV=4 |

Detailed Results

| Rank | Score | SPI (%) | BCS | # Unmatched Ions | Variable sites | Sequence                                                  | MH <sup>+</sup> Calculated (Da) | MH <sup>+</sup> Error (Da) | MH <sup>+</sup> Error (ppm) | Protein MW/pl (Da) | Species | Accession # | MS-Digest Index # | Protein Name                                                        |
|------|-------|---------|-----|------------------|----------------|-----------------------------------------------------------|---------------------------------|----------------------------|-----------------------------|--------------------|---------|-------------|-------------------|---------------------------------------------------------------------|
| 1    | 19.07 | 82.0    | 12  | 6/25             | K507k          | (K) L Q I T Y K / T A / V / E / T / A / V / L / L / R (I) | 1819.0688                       | 114.0526                   | 5.0                         | 60534.3/6.10       | HUMAN   | P49368      | 772195            | T-complex protein 1 subunit gamma OS=Homo sapiens GN=CCT3 PE=1 SV=4 |

  

| Fragment-ion (m/z)      | 72.080 | 84.078 | 86.094 | 131.113 | 171.106 | 175.113 | 185.161 | 225.128 | 226.182 | 242.147 | 288.197 | 325.177 | 343.201 | 401.294 | 496.301 | 507.273 | 514.370 | 613.438 | 638.397 | 684.468 | 785.512 | 846.522 <sup>+2</sup> | 914.559 | 1013.642 | 1185.686 |
|-------------------------|--------|--------|--------|---------|---------|---------|---------|---------|---------|---------|---------|---------|---------|---------|---------|---------|---------|---------|---------|---------|---------|-----------------------|---------|----------|----------|
| Frac. Inten. (% of TIC) | 0.21   | 0.17   | 15.33  | 4.03    | 2.77    | 3.22    | 3.17    | 2.48    | 3.30    | 2.63    | 2.86    | 2.71    | 2.17    | 2.23    | 2.50    | 3.67    | 7.25    | 10.58   | 2.26    | 5.53    | 5.69    | 3.62                  | 7.27    | 2.21     | 2.13     |
| Rel. Inten. (% of BP)   | 1.36   | 1.13   | 100.00 | 26.27   | 18.08   | 21.00   | 20.68   | 16.16   | 21.51   | 17.15   | 18.67   | 17.68   | 14.19   | 14.54   | 16.30   | 23.96   | 47.33   | 69.03   | 14.77   | 36.06   | 37.13   | 23.63                 | 47.47   | 14.44    | 13.93    |
| Score                   | 0.50   | 0.50   | 0.50   | -0.26   | -0.18   | 1.50    | -0.21   | 0.25    | -0.22   | 0.50    | 1.50    | 0.25    | 0.50    | 1.50    | -0.16   | 0.75    | 1.50    | 1.50    | -0.15   | 1.50    | 1.50    | 1.50                  | 1.50    | 1.50     | 1.50     |
| Ion-type                | V      | KQ     | a1     |         |         | y1      |         | b2-NH3  |         | b2      | y2      | b3-H2O  | b3      | y3      |         | YkT     | y4      | y5      |         | y6      | y7      | y14 <sup>+2</sup>     | y8      | y9       | y11      |
| Delta ppm               | -5.2   | -35.4  | -43.2  |         |         | -32.8   |         | 16.1    |         | -18.6   | -22.6   | -34.2   | 7.0     | 17.5    |         | 30.6    | -2.6    | -2.1    |         | -13.1   | -16.2   | 39.8                  | -8.4    | 6.4      | -29.0    |

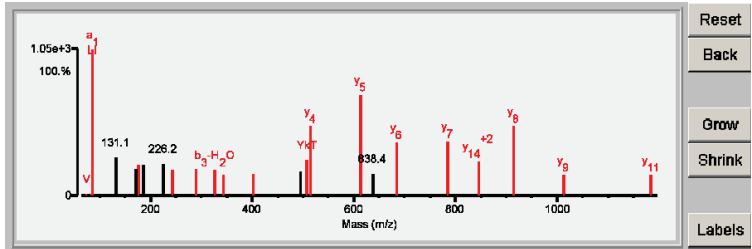

Result Summary

| Rank | Score | SPI (%) | BCS | # Unmatched Variable sites | Sequence                                                      | MH <sup>+</sup> Calculated (Da) | MH <sup>+</sup> Error (Da) | MH <sup>+</sup> Error (ppm) | Protein MW/pl (Da) | Species | Accession # | Protein Name                                                                  |
|------|-------|---------|-----|----------------------------|---------------------------------------------------------------|---------------------------------|----------------------------|-----------------------------|--------------------|---------|-------------|-------------------------------------------------------------------------------|
| 1    | 21.34 | 94.7    | 10  | 2/25                       | K260k (K)GTVLIKTAEELMNF <sup>+</sup> SK(G)                    | 1780.9513                       | 114.0592                   | 8.6                         | 59620.9/5.42       | HUMAN   | P50990      | T-complex protein 1 subunit theta OS=Homo sapiens GN=CCT8 PE=1 SV=4           |
| 2    | 9.96  | 69.0    | 4   | 9/25                       | K270k (K)GTVLIKTAEELMNF <sup>+</sup> SK(G)                    | 1780.9513                       | 114.0592                   | 8.6                         | 59620.9/5.42       | HUMAN   | P50990      | T-complex protein 1 subunit theta OS=Homo sapiens GN=CCT8 PE=1 SV=4           |
| 3    | 6.79  | 57.4    | 4   | 12/25                      | M779m K787k (R)TGVIIImL <sup>+</sup> CVFHF <sup>+</sup> Sk(V) | 1764.9539                       | 130.0566                   | 9.9                         | 91890.3/6.83       | HUMAN   | RQ9Y2C9     | REVERSE Toll-like receptor 6 OS=Homo sapiens GN=TLR6 PE=2 SV=1                |
| 4    | 5.57  | 56.7    | 3   | 13/25                      | None (K)KELLVGSEDFDIRV <sup>+</sup> FK(E)                     | 1895.0273                       | -0.0167                    | -8.8                        | 79871.0/5.74       | HUMAN   | Q9BXC9      | Bardet-Biedl syndrome 2 protein OS=Homo sapiens GN=BBS2 PE=1 SV=1             |
| 5    | 4.38  | 51.0    | 3   | 14/25                      | None (K)IKERQEAASGGGNIH <sup>+</sup> L <sup>+</sup> SK(K)     | 1895.0093                       | 0.0012                     | 0.6                         | 112135.9/6.52      | HUMAN   | RO94804     | REVERSE Serine/threonine-protein kinase 10 OS=Homo sapiens GN=STK10 PE=1 SV=1 |

Detailed Results

| Rank | Score | SPI (%) | BCS | # Unmatched Variable sites | Sequence                                     | MH <sup>+</sup> Calculated (Da) | MH <sup>+</sup> Error (Da) | MH <sup>+</sup> Error (ppm) | Protein MW/pl (Da) | Species | Accession #   | MS-Digest Index #                                                   | Protein Name |
|------|-------|---------|-----|----------------------------|----------------------------------------------|---------------------------------|----------------------------|-----------------------------|--------------------|---------|---------------|---------------------------------------------------------------------|--------------|
| 1    | 21.34 | 94.7    | 10  | 2/25                       | K260k (K)G T V L I K T A E E L M N F S K (G) | 1780.9513                       | 114.0592                   | 8.6                         | 59620.9/5.42       | HUMAN   | P50990 772267 | T-complex protein 1 subunit theta OS=Homo sapiens GN=CCT8 PE=1 SV=4 |              |

  

| Fragment-ion (m/z)     | 72.081 | 84.080 | 86.060 | 86.095 | 131.078        | 173.089 | 213.166 | 234.139        | 240.133                          | 258.141        | 325.232        | 343.227        | 371.226 | 469.310                         | 478.225        | 495.260        | 626.288                                         | 697.338 <sup>+2</sup>         | 706.357 <sup>+2</sup> | 739.387        | 762.889 <sup>+2</sup>         | 819.432 <sup>+2</sup>         | 868.425        | 997.476        | 1169.547        |
|------------------------|--------|--------|--------|--------|----------------|---------|---------|----------------|----------------------------------|----------------|----------------|----------------|---------|---------------------------------|----------------|----------------|-------------------------------------------------|-------------------------------|-----------------------|----------------|-------------------------------|-------------------------------|----------------|----------------|-----------------|
| Frac. Inten.(% of TIC) | 0.61   | 0.33   | 2.46   | 0.29   | 2.89           | 2.34    | 2.40    | 3.52           | 13.72                            | 4.37           | 2.84           | 2.36           | 6.13    | 2.45                            | 2.96           | 4.18           | 3.31                                            | 2.86                          | 9.37                  | 4.43           | 10.16                         | 4.12                          | 4.04           | 3.70           | 4.17            |
| Rel. Inten.(% of BP)   | 4.43   | 2.39   | 17.92  | 2.09   | 21.07          | 17.08   | 17.49   | 25.67          | 100.00                           | 31.89          | 20.69          | 17.19          | 44.72   | 17.83                           | 21.56          | 30.48          | 24.13                                           | 20.86                         | 68.32                 | 32.25          | 74.03                         | 30.00                         | 29.41          | 26.99          | 30.40           |
| Score                  | 0.50   | 0.50   | -0.18  | 0.22   | 0.50           | 0.75    | 0.75    | 1.50           | 0.25                             | 0.50           | -0.21          | 0.50           | 0.50    | 0.75                            | 0.50           | 1.50           | 1.50                                            | 0.50                          | 1.50                  | 1.50           | 1.50                          | 1.50                          | 1.50           | 1.50           | 1.50            |
| Ion-type               | V      | KQ     |        | LI     | a <sub>2</sub> | TA      | VL      | y <sub>2</sub> | b <sub>3</sub> -H <sub>2</sub> O | b <sub>3</sub> | a <sub>4</sub> | b <sub>4</sub> | Lk      | y <sub>4</sub> -NH <sub>3</sub> | y <sub>4</sub> | y <sub>5</sub> | y <sub>11</sub> -H <sub>2</sub> O <sup>+2</sup> | y <sub>11</sub> <sup>+2</sup> | y <sub>6</sub>        | y <sub>6</sub> | y <sub>12</sub> <sup>+2</sup> | y <sub>13</sub> <sup>+2</sup> | y <sub>7</sub> | y <sub>8</sub> | y <sub>10</sub> |
| Delta ppm              | -3.8   | -8.0   |        | -21.2  | -36.6          | -22.9   | -23.7   | -23.2          | -9.4                             | -17.5          |                | -23.8          | -11.8   | -10.2                           | -9.3           | 6.9            | -13.5                                           | -7.2                          | 13.3                  | 7.9            | -1.3                          | 0.0                           | 1.6            | 10.5           | -2.7            |

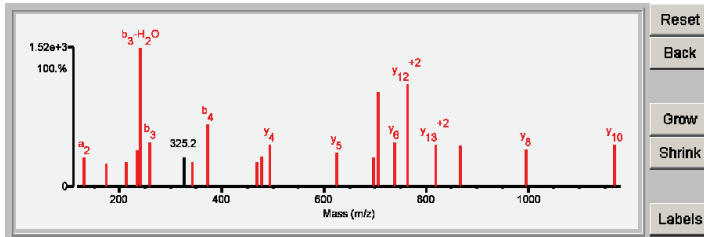

Result Summary

| Rank | Score | SPI (%) | BCS | # Unmatched Ions | Variable sites | Sequence            | MH <sup>+</sup> Calculated (Da) | MH <sup>+</sup> Error (Da) | MH <sup>+</sup> Error (ppm) | Protein MW/pi (Da) | Species | Accession # | Protein Name                                                                |
|------|-------|---------|-----|------------------|----------------|---------------------|---------------------------------|----------------------------|-----------------------------|--------------------|---------|-------------|-----------------------------------------------------------------------------|
| 1    | 13.15 | 68.2    | 8   | 10/25            | K341k          | (R)SLDLLGLEKDCGR(F) | 1588.8363                       | 114.0668                   | 14.0                        | 40929.8/5.02       | HUMAN   | O95551      | TRAF and TNF receptor-associated protein OS=Homo sapiens GN=TTRAP PE=1 SV=1 |

Detailed Results

| Rank | Score | SPI (%) | BCS | # Unmatched Ions | Variable sites | Sequence            | MH <sup>+</sup> Calculated (Da) | MH <sup>+</sup> Error (Da) | MH <sup>+</sup> Error (ppm) | Protein MW/pi (Da) | Species | Accession # | MS-Digest Index # | Protein Name                                                                |
|------|-------|---------|-----|------------------|----------------|---------------------|---------------------------------|----------------------------|-----------------------------|--------------------|---------|-------------|-------------------|-----------------------------------------------------------------------------|
| 1    | 13.15 | 68.2    | 8   | 10/25            | K341k          | (R)SLDLLGLEKDCGR(F) | 1588.8363                       | 114.0668                   | 14.0                        | 40929.8/5.02       | HUMAN   | O95551      | 806781            | TRAF and TNF receptor-associated protein OS=Homo sapiens GN=TTRAP PE=1 SV=1 |

  

| Fragment-ion (m/z)      | 70.064 | 84.077 | 86.097 | 102.054 | 143.116        | 159.036        | 173.127 | 191.104        | 201.122 | 229.115        | 316.148 | 354.167 | 358.177 | 373.190 | 392.171        | 398.241 | 456.254 | 507.190        | 581.302          | 609.297 | 620.288        | 637.813 <sup>+2</sup>         | 655.373 | 862.412        | 1161.576       |
|-------------------------|--------|--------|--------|---------|----------------|----------------|---------|----------------|---------|----------------|---------|---------|---------|---------|----------------|---------|---------|----------------|------------------|---------|----------------|-------------------------------|---------|----------------|----------------|
| Frac. Inten. (% of TIC) | 0.00   | 3.75   | 0.69   | 0.11    | 2.87           | 2.71           | 17.90   | 3.77           | 8.98    | 3.76           | 7.26    | 4.25    | 3.27    | 2.94    | 4.45           | 2.80    | 2.73    | 3.14           | 2.70             | 2.67    | 3.59           | 5.60                          | 2.86    | 4.11           | 3.07           |
| Rel. Inten. (% of BP)   | 0.03   | 20.98  | 3.83   | 0.64    | 16.02          | 15.14          | 100.00  | 21.04          | 50.21   | 21.00          | 40.59   | 23.72   | 18.28   | 16.45   | 24.88          | 15.67   | 15.28   | 17.53          | 15.10            | 14.91   | 20.08          | 31.30                         | 15.98   | 22.96          | 17.16          |
| Score                   | 0.20   | -0.21  | 0.22   | 1.00    | -0.16          | -0.15          | 0.50    | -0.21          | 0.50    | 0.75           | 0.50    | -0.24   | -0.18   | -0.16   | 1.50           | -0.16   | -0.15   | 1.50           | 1.50             | -0.15   | 1.50           | 1.50                          | 0.75    | 1.50           | 1.50           |
| Ion-type                | PR     |        | LI     | E       | a <sub>2</sub> | b <sub>2</sub> | LD      | b <sub>3</sub> | LD      | b <sub>3</sub> |         |         |         |         | y <sub>3</sub> |         |         | y <sub>4</sub> | y <sup>++g</sup> |         | y <sub>5</sub> | y <sub>10</sub> <sup>+2</sup> | GLEKL   | y <sub>6</sub> | y <sub>9</sub> |
| Delta ppm               | -11.8  |        | 4.3    | -8.4    |                |                | -15.9   |                | -12.3   | -19.6          | -10.5   |         |         |         | 0.3            |         |         | -16.6          | 24.6             |         | 9.9            | -25.8                         | -8.6    | -9.6           | 7.0            |

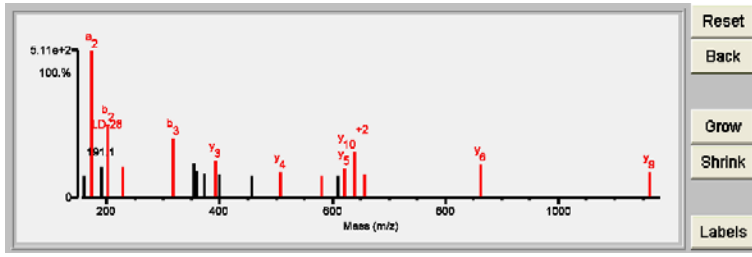

Result Summary

| Rank | Score | SPI (%) | BCS | # Unmatched Ions | Variable sites | Sequence                            | MH <sup>+</sup> Calculated (Da) | MH <sup>+</sup> Error (Da) | MH <sup>+</sup> Error (ppm) | Protein MW/pI (Da) | Species | Accession # | Protein Name                                                                       |
|------|-------|---------|-----|------------------|----------------|-------------------------------------|---------------------------------|----------------------------|-----------------------------|--------------------|---------|-------------|------------------------------------------------------------------------------------|
| 1    | 19.36 | 90.5    | 17  | 3/25             | K43k           | (R)EHALTSGTIKAMLSGPGQFAENETNEVNR(E) | 3248.5641                       | 114.0845                   | 12.4                        | 12473.2/4.74       | HUMAN   | Q15369      | Transcription elongation factor B polypeptide 1 OS=Homo sapiens GN=TCEB1 PE=1 SV=1 |

Detailed Results

| Rank                    | Score | SPI (%) | BCS | # Unmatched Ions | Variable sites | Sequence                            | MH <sup>+</sup> Calculated (Da) | MH <sup>+</sup> Error (Da) | MH <sup>+</sup> Error (ppm) | Protein MW/pI (Da) | Species | Accession # | MS-Digest Index # | Protein Name                                                                       |         |         |                       |         |                       |                       |                   |                   |                   |         |         |         |         |                       |                   |                        |          |      |  |  |  |
|-------------------------|-------|---------|-----|------------------|----------------|-------------------------------------|---------------------------------|----------------------------|-----------------------------|--------------------|---------|-------------|-------------------|------------------------------------------------------------------------------------|---------|---------|-----------------------|---------|-----------------------|-----------------------|-------------------|-------------------|-------------------|---------|---------|---------|---------|-----------------------|-------------------|------------------------|----------|------|--|--|--|
| 1                       | 19.36 | 90.5    | 17  | 3/25             | K43k           | (R)EHALTSGTIKAMLSGPGQFAENETNEVNR(E) | 3248.5641                       | 114.0845                   | 12.4                        | 12473.2/4.74       | HUMAN   | Q15369      | 189451            | Transcription elongation factor B polypeptide 1 OS=Homo sapiens GN=TCEB1 PE=1 SV=1 |         |         |                       |         |                       |                       |                   |                   |                   |         |         |         |         |                       |                   |                        |          |      |  |  |  |
| Fragment-Ion (m/z)      |       |         |     |                  |                |                                     | 84.082                          | 86.096                     | 120.061                     | 175.117            | 267.108 | 314.179     | 322.191           | 338.147                                                                            | 436.232 | 535.300 | 576.816 <sup>+2</sup> | 664.336 | 677.840 <sup>+2</sup> | 734.383 <sup>+2</sup> | 777.910           | 778.387           | 879.440           | 892.464 | 910.468 | 937.447 | 938.970 | 947.476 <sup>+2</sup> | 1008.478          | 1022.022 <sup>+2</sup> | 1122.524 |      |  |  |  |
| Frac. Inten. (% of TIC) |       |         |     |                  |                |                                     | 0.13                            | 0.17                       | 0.20                        | 3.83               | 3.05    | 2.88        | 4.95              | 5.87                                                                               | 6.25    | 8.80    | 2.82                  | 3.10    | 2.93                  | 4.66                  | 2.92              | 7.57              | 10.98             | 3.36    | 2.91    | 3.74    | 3.06    | 7.46                  | 2.70              | 2.68                   | 2.98     |      |  |  |  |
| Rel. Inten. (% of BP)   |       |         |     |                  |                |                                     | 1.22                            | 1.56                       | 1.80                        | 34.88              | 27.52   | 28.19       | 45.12             | 53.49                                                                              | 56.89   | 80.18   | 25.68                 | 28.20   | 26.67                 | 42.41                 | 26.61             | 68.98             | 100.00            | 30.65   | 26.47   | 34.03   | 27.90   | 67.99                 | 24.61             | 24.39                  | 27.15    |      |  |  |  |
| Score                   |       |         |     |                  |                |                                     | 0.50                            | 0.22                       | 1.00                        | 1.50               | 0.50    | 0.75        | 1.50              | 0.50                                                                               | 1.50    | 0.50    | 1.50                  | 0.50    | 1.50                  | 0.50                  | 1.50              | 0.50              | 1.50              | 0.25    | 0.50    | 0.50    | -0.34   | -0.28                 | 0.50              | 1.50                   | -0.24    | 1.50 |  |  |  |
| Ion-type                |       |         |     |                  |                |                                     | KQ                              | LI                         | F                           | Y1                 | b2      | kA          | y2                | b3                                                                                 | y3      | y4      | b10 <sup>+2</sup>     | y5      | b12 <sup>+2</sup>     | b13 <sup>+2</sup>     | b13 <sup>+2</sup> | b13 <sup>+2</sup> | b13 <sup>+2</sup> | y6      | y7      | b9-H2O  | b9      | b9                    | b18 <sup>+2</sup> | y8                     | y9       |      |  |  |  |
| Delta ppm               |       |         |     |                  |                |                                     | 8.6                             | -8.4                       | -1.5                        | -13.4              | -8.5    | -12.7       | 11.3              | HAL 7.9                                                                            | -0.6    | 4.8     | 3.0                   |         |                       |                       |                   |                   |                   |         |         |         |         |                       |                   |                        |          |      |  |  |  |

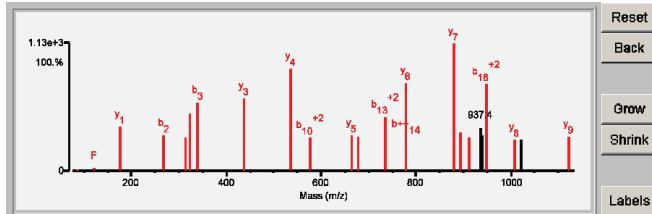

Result Summary

| Rank | Score | SPI (%) | BCS | # Unmatched Ions | Variable sites | Sequence                  | MH <sup>+</sup> Calculated (Da) | MH <sup>+</sup> Error (Da) | MH <sup>+</sup> Error (ppm) | Protein MW/pl (Da) | Species | Accession # | Protein Name                                                               |
|------|-------|---------|-----|------------------|----------------|---------------------------|---------------------------------|----------------------------|-----------------------------|--------------------|---------|-------------|----------------------------------------------------------------------------|
| 1    | 17.25 | 92.4    | 6   | 3/25             | K109k          | (R)LDVVISIQPCPDVKYGK(R)   | 1888.9837                       | 114.0466                   | 1.9                         | 89322.3/5.14       | HUMAN   | P55072      | Transitional endoplasmic reticulum ATPase OS=Homo sapiens GN=VCP PE=1 SV=4 |
| 2    | 15.37 | 90.2    | 5   | 4/25             | K112k          | (R)LDVVISIQPCPDVKYGK(R)   | 1888.9837                       | 114.0466                   | 1.9                         | 89322.3/5.14       | HUMAN   | P55072      | Transitional endoplasmic reticulum ATPase OS=Homo sapiens GN=VCP PE=1 SV=4 |
| 3    | 5.30  | 61.1    | 2   | 10/25            | None           | (K)TPSAL EPLSSTLQDSLEK(V) | 2003.0179                       | 0.0124                     | 6.2                         | 162423.8/10.71     | HUMAN   | Q5SNV9      | Uncharacterized protein C1orf167 OS=Homo sapiens GN=C1orf167 PE=2 SV=2     |

Detailed Results

| Rank | Score | SPI (%) | BCS | # Unmatched Ions | Variable sites | Sequence                | MH <sup>+</sup> Calculated (Da) | MH <sup>+</sup> Error (Da) | MH <sup>+</sup> Error (ppm) | Protein MW/pl (Da) | Species | Accession # | MS-Digest Index # | Protein Name                                                               |
|------|-------|---------|-----|------------------|----------------|-------------------------|---------------------------------|----------------------------|-----------------------------|--------------------|---------|-------------|-------------------|----------------------------------------------------------------------------|
| 1    | 17.25 | 92.4    | 6   | 3/25             | K109k          | (R)LDVVISIQPCPDVKYGK(R) | 1888.9837                       | 114.0466                   | 1.9                         | 89322.3/5.14       | HUMAN   | P55072      | 773751            | Transitional endoplasmic reticulum ATPase OS=Homo sapiens GN=VCP PE=1 SV=4 |

  

| Fragment-ion (m/z)     | 70.066 | 72.082 | 84.046 | 84.078 | 86.096 | 101.070 | 173.127 | 201.120 | 230.098 | 258.094 | 272.124 | 286.141 | 329.181 | 357.213  | 367.199 | 385.210 | 454.233 | 468.240 | 554.293 | 589.284 <sup>+2</sup> | 644.308 <sup>+2</sup> | 653.312 <sup>+2</sup> | 809.928 <sup>+2</sup> | 920.480 | 1177.568 |
|------------------------|--------|--------|--------|--------|--------|---------|---------|---------|---------|---------|---------|---------|---------|----------|---------|---------|---------|---------|---------|-----------------------|-----------------------|-----------------------|-----------------------|---------|----------|
| Frac. Inten.(% of TIC) | 0.00   | 0.09   | 2.99   | 0.09   | 16.82  | 0.13    | 4.28    | 2.22    | 2.55    | 2.96    | 2.44    | 7.87    | 3.59    | 4.71     | 2.54    | 4.02    | 2.39    | 2.26    | 2.12    | 9.65                  | 3.99                  | 2.07                  | 2.95                  | 7.91    | 9.36     |
| Rel. Inten.(% of BP)   | 0.01   | 0.54   | 17.80  | 0.52   | 100.00 | 0.77    | 25.46   | 13.20   | 15.18   | 17.58   | 14.52   | 46.79   | 21.33   | 27.99    | 15.08   | 23.90   | 14.21   | 13.41   | 12.58   | 57.39                 | 23.70                 | 12.33                 | 17.55                 | 47.02   | 55.65    |
| Score                  | 0.20   | 0.50   | -0.18  |        | 0.50   | 0.50    | 0.75    | 0.50    | 0.75    | 0.50    | 0.75    | 0.50    | 0.75    | 0.50     | 1.50    | 0.75    | -0.14   | -0.13   | 0.75    | 1.50                  | 0.50                  | 1.50                  | 1.50                  | 1.50    | 1.50     |
| Ion-type               | PR     | V      |        | QK     | a1     | QK      | SI-28   | SI      | CP-28   | CP      | GDV     | b3      | SIQ     | a4       | b4-H2O  | b4      |         |         | PDVk    | y9 <sup>+2</sup>      | y10-H2O <sup>+2</sup> | y10 <sup>+2</sup>     | b14-H2O <sup>+2</sup> | y7      | y9       |
| Delta ppm              | 18.2   | 19.8   |        |        | -13.0  | -8.3    | -12.4   | -23.2   | 6.6     | 8.6     | -5.5    | 0.2     | -6.8    | -2.9     | -13.0   | 2.2     | 2.2     |         | -2.7    | -4.7                  | -4.7                  | -6.2                  | 13.5                  | -3.6    | 0.5      |
|                        |        |        |        |        | LI     |         |         |         |         |         |         |         |         | GDVI-28  | y3      | GDVI    |         |         |         |                       |                       |                       | y13 <sup>+2</sup>     |         |          |
|                        |        |        |        |        | -0.3   |         |         |         |         |         |         |         |         | -2.9     | 3.6     | 2.2     |         |         |         |                       |                       |                       | 14.2                  |         |          |
|                        |        |        |        |        |        |         |         |         |         |         |         |         |         | GDVI-H2O | 0.6     |         |         |         |         |                       |                       |                       |                       |         |          |

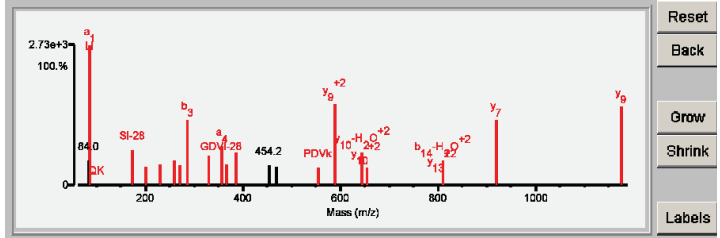

Reset

Back

Grow

Shrink

Labels



Result Summary

| Rank | Score | SPI (%) | BCS | # Unmatched Ions | Variable sites | Sequence             | MH <sup>+</sup> Calculated (Da) | MH <sup>+</sup> Error (Da) | MH <sup>+</sup> Error (ppm) | Protein MW/pI (Da) | Species | Accession # | Protein Name                                                               |
|------|-------|---------|-----|------------------|----------------|----------------------|---------------------------------|----------------------------|-----------------------------|--------------------|---------|-------------|----------------------------------------------------------------------------|
| 1    | 11.61 | 72.4    | 5   | 8/24             | K217k          | (K)QLAQIKEMVELPLR(H) | 1667.9513                       | 114.0568                   | 7.8                         | 89322.3/5.14       | HUMAN   | P55072      | Transitional endoplasmic reticulum ATPase OS=Homo sapiens GN=VCP PE=1 SV=4 |

Detailed Results

| Rank | Score | SPI (%) | BCS | # Unmatched Ions | Variable sites | Sequence             | MH <sup>+</sup> Calculated (Da) | MH <sup>+</sup> Error (Da) | MH <sup>+</sup> Error (ppm) | Protein MW/pI (Da) | Species | Accession # | MS-Digest Index # | Protein Name                                                               |
|------|-------|---------|-----|------------------|----------------|----------------------|---------------------------------|----------------------------|-----------------------------|--------------------|---------|-------------|-------------------|----------------------------------------------------------------------------|
| 1    | 11.61 | 72.4    | 5   | 8/24             | K217k          | (K)QLAQIKEMVELPLR(H) | 1667.9513                       | 114.0568                   | 7.8                         | 89322.3/5.14       | HUMAN   | P55072      | 773751            | Transitional endoplasmic reticulum ATPase OS=Homo sapiens GN=VCP PE=1 SV=4 |

| Fragment-ion (m/z)      | 72.081 | 84.081 | 86.096 | 101.069 | 102.051 | 155.116 | 193.127          | 197.130 | 198.122 | 214.150 | 296.170                         | 368.240                         | 372.188 | 385.261        | 423.237 | 424.210 <sup>+2</sup> | 498.351        | 503.240 <sup>+2</sup> | 536.327 | 578.308          | 627.384        | 726.453        | 857.517        | 986.577 |
|-------------------------|--------|--------|--------|---------|---------|---------|------------------|---------|---------|---------|---------------------------------|---------------------------------|---------|----------------|---------|-----------------------|----------------|-----------------------|---------|------------------|----------------|----------------|----------------|---------|
| Frac. Inten. (% of TIC) | 0.13   | 0.16   | 0.13   | 0.10    | 0.10    | 2.92    | 3.95             | 2.87    | 3.47    | 6.84    | 2.87                            | 5.98                            | 3.56    | 10.80          | 4.36    | 3.52                  | 10.38          | 3.29                  | 4.79    | 2.95             | 10.89          | 7.98           | 4.72           | 3.23    |
| Rel. Inten. (% of BP)   | 1.22   | 1.44   | 1.18   | 0.90    | 0.91    | 26.80   | 36.31            | 26.36   | 31.91   | 62.79   | 26.36                           | 54.95                           | 32.70   | 99.21          | 40.05   | 32.37                 | 95.36          | 30.24                 | 43.97   | 27.13            | 100.00         | 73.31          | 43.38          | 29.71   |
| Score                   | 0.50   | 0.50   | 0.22   | 0.50    | 1.00    | -0.27   | 1.50             | -0.26   | -0.32   | 0.50    | 0.25                            | 0.50                            | 0.75    | 1.50           | -0.40   | -0.32                 | 1.50           | -0.30                 | -0.44   | 0.50             | 1.50           | 1.50           | 1.50           | -0.30   |
| Ion-type                | V      | KQ     | KQ     | LI      | a1      | E       | y <sup>++3</sup> |         |         | a2      | b <sub>3</sub> -NH <sub>3</sub> | y <sub>3</sub> -NH <sub>3</sub> | KE      | y <sub>3</sub> |         |                       | y <sub>4</sub> |                       |         | b <sup>++9</sup> | y <sub>5</sub> | y <sub>6</sub> | y <sub>7</sub> |         |
| Delta ppm               | 4.5    | 5.0    | -2.6   | -31.0   | -39.7   |         | -25.0            |         |         | -26.2   | 29.1                            | 28.7                            | -2.6    | 13.8           |         |                       | 23.4           |                       |         | -9.7             | 1.7            | 2.4            | 29.9           |         |

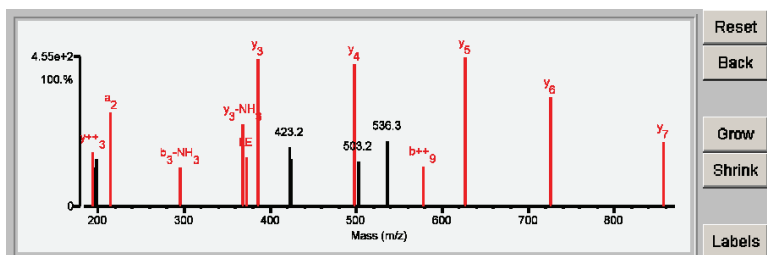

Result Summary

| Rank | Score | SPI (%) | BCS | # Unmatched Ions | Variable sites | Sequence                | MH <sup>+</sup> Calculated (Da) | MH <sup>+</sup> Error (Da) | MH <sup>+</sup> Error (ppm) | Protein MW/pI (Da) | Species | Accession # | Protein Name                                                               |
|------|-------|---------|-----|------------------|----------------|-------------------------|---------------------------------|----------------------------|-----------------------------|--------------------|---------|-------------|----------------------------------------------------------------------------|
| 1    | 12.42 | 71.2    | 8   | 9/25             | K251k          | (R)GILLYGPPGTGKTLIAR(A) | 1727.0214                       | 114.0500                   | 3.9                         | 89322.3/5.14       | HUMAN   | P55072      | Transitional endoplasmic reticulum ATPase OS=Homo sapiens GN=VCP PE=1 SV=4 |

Detailed Results

| Rank                   | Score | SPI (%) | BCS    | # Unmatched Ions | Variable sites | Sequence                                   | MH <sup>+</sup> Calculated (Da) | MH <sup>+</sup> Error (Da) | MH <sup>+</sup> Error (ppm) | Protein MW/pI (Da) | Species | Accession # | MS-Digest Index # | Protein Name                                                               |         |         |         |         |                       |         |         |                       |                       |                       |         |          |
|------------------------|-------|---------|--------|------------------|----------------|--------------------------------------------|---------------------------------|----------------------------|-----------------------------|--------------------|---------|-------------|-------------------|----------------------------------------------------------------------------|---------|---------|---------|---------|-----------------------|---------|---------|-----------------------|-----------------------|-----------------------|---------|----------|
| 1                      | 12.42 | 71.2    | 8      | 9/25             | K251k          | (R)G I L L V Y G P P G T G K T L I A R (A) | 1727.0214                       | 114.0500                   | 3.9                         | 89322.3/5.14       | HUMAN   | P55072      | 773751            | Transitional endoplasmic reticulum ATPase OS=Homo sapiens GN=VCP PE=1 SV=4 |         |         |         |         |                       |         |         |                       |                       |                       |         |          |
| Fragment-ion (m/z)     |       | 70.066  | 86.097 | 87.100           | 127.087        | 136.079                                    | 143.119                         | 155.081                    | 171.110                     | 199.173            | 240.177 | 284.197     | 334.175           | 359.236                                                                    | 365.219 | 368.182 | 401.255 | 560.285 | 564.320 <sup>+2</sup> | 573.377 | 603.866 | 641.376 <sup>+2</sup> | 722.899 <sup>+2</sup> | 779.928 <sup>+2</sup> | 872.528 | 1127.646 |
| Frac. Inten.(% of TIC) |       | 0.01    | 0.65   | 4.94             | 5.83           | 0.08                                       | 3.89                            | 4.99                       | 4.31                        | 3.25               | 2.12    | 8.14        | 2.22              | 2.65                                                                       | 3.35    | 3.13    | 2.49    | 2.25    | 7.77                  | 2.82    | 3.99    | 9.59                  | 7.91                  | 3.32                  | 2.56    | 7.74     |
| Rel. Inten.(% of BP)   |       | 0.07    | 6.75   | 51.48            | 60.82          | 0.68                                       | 40.58                           | 52.08                      | 44.93                       | 33.92              | 22.07   | 84.92       | 23.17             | 27.62                                                                      | 34.90   | 32.67   | 25.96   | 23.44   | 80.97                 | 29.43   | 41.56   | 100.00                | 82.45                 | 34.63                 | 26.73   | 80.70    |
| Score                  |       | 0.20    | 0.22   | -0.51            | 0.50           | 1.00                                       | 0.50                            | 0.75                       | 0.50                        | -0.34              | -0.22   | 0.50        | 0.75              | 1.50                                                                       | -0.35   | -0.33   | -0.26   | -0.23   | 1.50                  | 1.50    | 1.50    | 1.50                  | 1.50                  | 1.50                  | 1.50    | 1.50     |
| Ion-type               |       | PR      | LI     |                  | PG-28          | Y                                          | a2                              | PG                         | b2                          |                    |         | b3          | LYG               | y3                                                                         |         |         |         |         | Y10 <sup>+2</sup>     | Y5      |         | Y12 <sup>+2</sup>     | Y13 <sup>+2</sup>     | Y7                    | Y10     |          |
| Delta ppm              |       | 13.9    | 11.3   |                  | -9.3           | 24.3                                       | 0.1                             | -10.3                      | -25.1                       |                    |         | -4.5        | -7.3              | -10.9                                                                      |         |         |         |         | -18.6                 | 9.6     |         | 14.0                  | 0.6                   | -3.4                  | -6.2    |          |

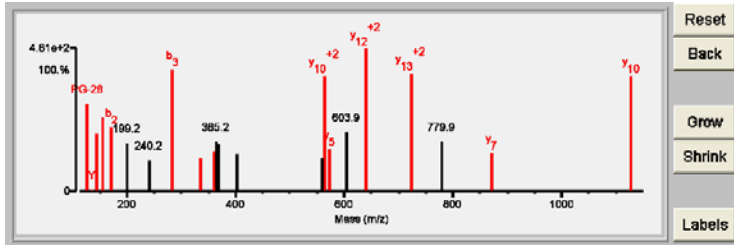

Result Summary

| Rank | Score | SPI (%) | BCS | # Unmatched Ions | Variable sites | Sequence                | MH <sup>+</sup> Calculated (Da) | MH <sup>+</sup> Error (Da) | MH <sup>+</sup> Error (ppm) | Protein MW/pI (Da) | Species | Accession # | Protein Name                                                                        |
|------|-------|---------|-----|------------------|----------------|-------------------------|---------------------------------|----------------------------|-----------------------------|--------------------|---------|-------------|-------------------------------------------------------------------------------------|
| 1    | 14.16 | 69.8    | 8   | 11/25            | K312k          | (K)NAPAIIFIDLDIAAPKR(E) | 1967.0960                       | 114.0525                   | 4.6                         | 89322.3/5.14       | HUMAN   | P55072      | Transitional endoplasmic reticulum ATPase OS=Homo sapiens GN=VCP PE=1 SV=4          |
| 2    | 4.26  | 51.9    | 4   | 16/25            | K181k          | (K)GKQYLEGLTLLYVSKR(F)  | 1967.1324                       | 114.0161                   | -12.9                       | 122491.7/5.10      | HUMAN   | RQ96RU2     | REVERSE Ubiquitin carboxyl-terminal hydrolase 28 OS=Homo sapiens GN=USP28 PE=1 SV=1 |

Detailed Results

| Rank | Score | SPI (%) | BCS | # Unmatched Ions | Variable sites | Sequence                | MH <sup>+</sup> Calculated (Da) | MH <sup>+</sup> Error (Da) | MH <sup>+</sup> Error (ppm) | Protein MW/pI (Da) | Species | Accession # | MS-Digest Index # | Protein Name                                                               |
|------|-------|---------|-----|------------------|----------------|-------------------------|---------------------------------|----------------------------|-----------------------------|--------------------|---------|-------------|-------------------|----------------------------------------------------------------------------|
| 1    | 14.16 | 69.8    | 8   | 11/25            | K312k          | (K)NAPAIIFIDLDIAAPKR(E) | 1967.0960                       | 114.0525                   | 4.6                         | 89322.3/5.14       | HUMAN   | P55072      | 773751            | Transitional endoplasmic reticulum ATPase OS=Homo sapiens GN=VCP PE=1 SV=4 |

  

| Fragment-ion (m/z)     | 70.060 | 86.097 | 88.042 | 113.072 | 116.072 | 120.079 | 141.065 | 158.092 | 169.095 | 175.115 | 185.114 | 282.183 | 462.223 | 514.305 | 542.333 | 585.350 | 590.322 | 632.694 | 655.445 | 698.452 | 769.444 | 808.438 | 884.499 | 948.523 | 1126.666 |
|------------------------|--------|--------|--------|---------|---------|---------|---------|---------|---------|---------|---------|---------|---------|---------|---------|---------|---------|---------|---------|---------|---------|---------|---------|---------|----------|
| Frac. Inten.(% of TIC) | 1.99   | 0.17   | 2.65   | 3.17    | 2.12    | 0.08    | 4.78    | 9.07    | 2.59    | 3.15    | 2.70    | 2.57    | 2.28    | 16.66   | 4.65    | 11.55   | 2.26    | 4.17    | 1.99    | 2.61    | 5.52    | 2.14    | 4.88    | 2.95    | 3.33     |
| Rel. Inten.(% of BP)   | 11.93  | 1.00   | 15.88  | 19.04   | 12.70   | 0.50    | 28.72   | 54.43   | 15.52   | 18.90   | 16.24   | 15.42   | 13.66   | 100.00  | 27.92   | 69.30   | 13.56   | 25.03   | 11.97   | 15.67   | 33.11   | 12.82   | 29.28   | 17.71   | 19.98    |
| Score                  | -0.12  | 0.22   | -0.16  | -0.19   | -0.13   | 1.00    | -0.29   | 0.50    | 0.75    | 1.50    | 0.75    | -0.16   | -0.14   | 1.50    | 0.75    | 1.50    | -0.14   | -0.25   | -0.12   | 1.50    | 1.50    | -0.13   | 1.50    | 1.50    | 1.50     |
| Ion-type               |        | LI     |        |         |         | F       |         | a2      | AP      | y1      | IAP     |         |         | y3      | PAIF    | y4      |         |         |         | y5      | y6      |         | y7      | y**16   | y9       |
| Delta ppm              |        | 3.2    |        |         |         | -13.1   |         | -1.9    | -13.9   | -22.0   | 4.5     |         |         | -8.4    | -1.3    | 5.9     |         |         |         | 29.9    | -30.9   |         | 5.2     | -11.0   | 39.1     |

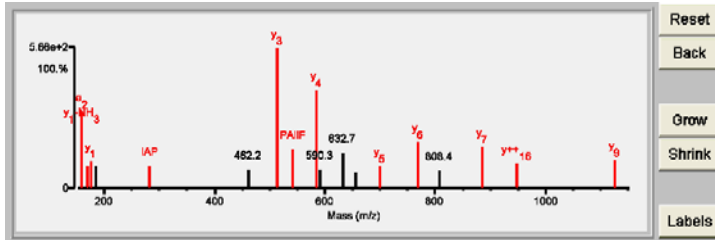

Result Summary

| Rank | Score | SPI (%) | BCS | # Unmatched Ions | Variable sites | Sequence                          | MH <sup>+</sup> Calculated (Da) | MH <sup>+</sup> Error (Da) | MH <sup>+</sup> Error (ppm) | Protein MW/pl (Da) | Species | Accession # | Protein Name                                                                                             |
|------|-------|---------|-----|------------------|----------------|-----------------------------------|---------------------------------|----------------------------|-----------------------------|--------------------|---------|-------------|----------------------------------------------------------------------------------------------------------|
| 1    | 19.33 | 84.7    | 11  | 6/24             | K336k          | (R)IVS <del>QL</del> TLMDGLKQR(A) | 1714.9884                       | 114.0644                   | 11.8                        | 89322.3/5.14       | HUMAN   | P55072      | Transitional endoplasmic reticulum ATPase OS=Homo sapiens GN=VCP PE=1 SV=4                               |
| 2    | 8.46  | 64.8    | 3   | 12/24            | K5439k         | (K)LIITINVITASGLKSER(E)           | 1715.0062                       | 114.0467                   | 2.1                         | 692677.1/4.53      | HUMAN   | RQ8WXG9     | REVERSE G-protein coupled receptor 98 OS=Homo sapiens GN=GPR98 PE=1 SV=1                                 |
| 3    | 6.14  | 52.4    | 3   | 13/24            | None           | (R)DPLVTPHLQLQLLVR(Q)             | 1829.0643                       | -0.0115                    | -6.3                        | 84082.7/8.38       | HUMAN   | RQ9BRB3     | REVERSE Phosphatidylinositol N-acetylglucosaminyltransferase subunit Q OS=Homo sapiens GN=PIGQ PE=1 SV=3 |

Detailed Results

| Rank | Score | SPI (%) | BCS | # Unmatched Ions | Variable sites | Sequence                                    | MH <sup>+</sup> Calculated (Da) | MH <sup>+</sup> Error (Da) | MH <sup>+</sup> Error (ppm) | Protein MW/pl (Da) | Species | Accession # | MS-Digest Index # | Protein Name                                                               |
|------|-------|---------|-----|------------------|----------------|---------------------------------------------|---------------------------------|----------------------------|-----------------------------|--------------------|---------|-------------|-------------------|----------------------------------------------------------------------------|
| 1    | 19.33 | 84.7    | 11  | 6/24             | K336k          | (R) I V I S Q I I L L T L M D G L K Q R (A) | 1714.9884                       | 114.0644                   | 11.8                        | 89322.3/5.14       | HUMAN   | P55072      | 773751            | Transitional endoplasmic reticulum ATPase OS=Homo sapiens GN=VCP PE=1 SV=4 |

  

| Fragment-ion (m/z)      | 72.081 | 86.096 | 87.100 | 104.053 | 175.117 | 185.165 | 186.168 | 187.143 | 213.160 | 216.099 | 303.180 | 310.214 | 329.186 | 428.253 | 541.343 | 545.321 | 701.404 <sup>+2</sup> | 715.429 | 808.948          | 809.457 | 830.455 | 961.499 | 1074.583 | 1175.622 |
|-------------------------|--------|--------|--------|---------|---------|---------|---------|---------|---------|---------|---------|---------|---------|---------|---------|---------|-----------------------|---------|------------------|---------|---------|---------|----------|----------|
| Frac. Inten. (% of TIC) | 0.14   | 22.90  | 2.03   | 3.81    | 1.55    | 11.13   | 1.36    | 2.05    | 3.21    | 6.14    | 2.27    | 2.53    | 4.44    | 1.52    | 1.88    | 2.29    | 1.42                  | 6.78    | 2.11             | 3.57    | 4.73    | 5.35    | 2.78     | 4.01     |
| Rel. Inten. (% of BP)   | 0.60   | 100.00 | 8.87   | 16.64   | 6.78    | 48.59   | 5.96    | 8.93    | 14.00   | 26.82   | 9.90    | 11.03   | 19.40   | 6.66    | 8.22    | 10.00   | 6.20                  | 29.62   | 9.21             | 15.58   | 20.63   | 23.38   | 12.12    | 17.50    |
| Score                   | 0.50   | 0.50   | 0.50   | -0.09   | 1.50    | 0.50    | -0.06   | -0.09   | 0.50    | 0.75    | 1.50    | -0.11   | 0.75    | 0.75    | 0.75    | 1.50    | 1.50                  | 1.50    | 1.50             | 1.50    | 1.50    | 1.50    | 1.50     | 1.50     |
| Ion-type                | V      | a1     | a1     |         | y1      | a2      |         | b2      | SQ      | y2      |         |         | SQ      | b4      | b5      | y3      | y11 <sup>+2</sup>     | y5      | y <sup>+13</sup> |         | y6      | y7      | y8       | y9       |
| Delta ppm               | 3.1    | -13.0  | 0.50   |         | -10.6   | -7.8    |         | -2.6    | 0.1     | 6.5     |         |         | 9.6     | -4.5    | 14.4    | 10.6    | 9.5                   | 11.0    | 5.9              |         | 8.3     | 10.7    | 9.6      | 1.9      |
|                         |        | LI     |        |         |         |         |         |         |         |         |         |         | VSQ     | VSQ     | VSQ     | VSQ     | VSQ                   |         |                  |         |         |         |          |          |

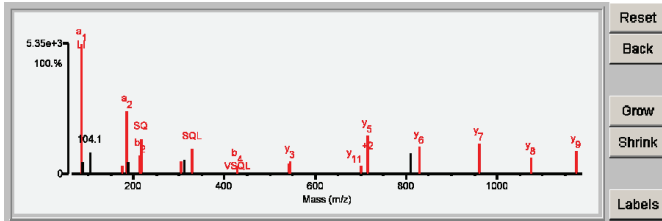

Result Summary

| Rank | Score | SPI (%) | BCS | # Unmatched Ions | Variable sites | Sequence                       | MH <sup>+</sup> Calculated (Da) | MH <sup>+</sup> Error (Da) | MH <sup>+</sup> Error (ppm) | Protein MW/pI (Da) | Species | Accession # | Protein Name                                                               |
|------|-------|---------|-----|------------------|----------------|--------------------------------|---------------------------------|----------------------------|-----------------------------|--------------------|---------|-------------|----------------------------------------------------------------------------|
| 1    | 11.42 | 67.9    | 5   | 11/25            | K486k          | (R)ETVVEVPQVTWEDIGGLEDRV(R)(E) | 2498.2773                       | 114.0674                   | 9.4                         | 89322.3/5.14       | HUMAN   | P55072      | Transitional endoplasmic reticulum ATPase OS=Homo sapiens GN=VCP PE=1 SV=4 |

Detailed Results

| Rank                   | Score | SPI (%) | BCS    | # Unmatched Ions | Variable sites      | Sequence                                             | MH <sup>+</sup> Calculated (Da) | MH <sup>+</sup> Error (Da) | MH <sup>+</sup> Error (ppm) | Protein MW/pI (Da) | Species             | Accession #         | MS-Digest Index # | Protein Name                                                               |         |         |         |         |                     |                       |                   |         |                        |                   |                    |          |
|------------------------|-------|---------|--------|------------------|---------------------|------------------------------------------------------|---------------------------------|----------------------------|-----------------------------|--------------------|---------------------|---------------------|-------------------|----------------------------------------------------------------------------|---------|---------|---------|---------|---------------------|-----------------------|-------------------|---------|------------------------|-------------------|--------------------|----------|
| 1                      | 11.42 | 67.9    | 5      | 11/25            | K486k               | (R)E T V V E I V P Q V T W E D I G G L E D V K R (E) | 2498.2773                       | 114.0674                   | 9.4                         | 89322.3/5.14       | HUMAN               | P55072              | 773751            | Transitional endoplasmic reticulum ATPase OS=Homo sapiens GN=VCP PE=1 SV=4 |         |         |         |         |                     |                       |                   |         |                        |                   |                    |          |
| Fragment-ion (m/z)     |       | 70.064  | 72.079 | 159.090          | 171.148             | 312.148                                              | 328.181 <sup>+3</sup>           | 411.227                    | 423.195                     | 454.220            | 509.238             | 540.270             | 558.285           | 566.288                                                                    | 638.234 | 670.314 | 794.744 | 930.269 | 969.478             | 978.493 <sup>+2</sup> | 978.607           | 987.524 | 1028.031 <sup>+2</sup> | 1092.534          | 1113.071           | 1215.640 |
| Frac. Inten.(% of TIC) |       | 0.00    | 0.12   | 0.12             | 3.74                | 8.04                                                 | 3.80                            | 2.64                       | 2.41                        | 2.98               | 2.43                | 4.44                | 3.95              | 2.74                                                                       | 3.88    | 2.91    | 2.31    | 2.87    | 2.94                | 25.08                 | 2.48              | 2.28    | 9.34                   | 3.42              | 2.55               | 2.52     |
| Rel. Inten.(% of BP)   |       | 0.01    | 0.49   | 0.48             | 14.91               | 32.07                                                | 15.15                           | 10.53                      | 9.60                        | 11.90              | 9.71                | 17.71               | 15.76             | 10.90                                                                      | 15.45   | 11.59   | 9.20    | 11.42   | 11.73               | 100.00                | 9.90              | 9.08    | 37.24                  | 13.65             | 10.15              | 10.03    |
| Score                  |       | 0.20    | 0.50   | 2.00             | -0.15               | 0.25                                                 | -0.15                           | 0.25                       | -0.10                       | 0.75               | -0.10               | 0.25                | 0.50              | -0.11                                                                      | -0.15   | -0.12   | -0.09   | -0.11   | 0.50                | 1.50                  | -0.10             | 1.50    | 1.50                   | 1.50              | -0.10              | 1.50     |
| Ion-type               |       | PR      | V      | W                | b3-H <sub>2</sub> O | b3-H <sub>2</sub> O                                  | b4-H <sub>2</sub> O             | b4-H <sub>2</sub> O        | EVPQ                        | EVPQ               | b5-H <sub>2</sub> O | b5-H <sub>2</sub> O | b5                | b5                                                                         |         |         |         |         | y8-H <sub>2</sub> O | y16 <sup>+2</sup>     | y16 <sup>+2</sup> | y8      | y17 <sup>+2</sup>      | y17 <sup>+2</sup> | y <sup>++</sup> 18 | y10      |
| Delta ppm              |       | -10.4   | -20.5  | -12.4            |                     | -26.9                                                |                                 | 4.8                        |                             | -23.2              |                     | 4.8                 | 13.1              |                                                                            |         |         |         |         | -34.7               | -1.6                  | -1.6              | 2.8     | 1.7                    | 1.7               | -15.2              | 5.8      |

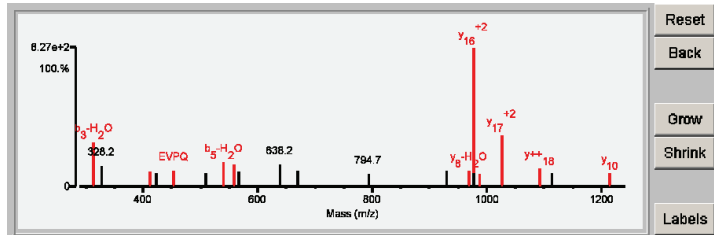

Reset

Back

Grow

Shrink

Labels

Result Summary

| Rank | Score | SPI (%) | BCS | # Unmatched Ions | Variable sites | Sequence                   | MH <sup>+</sup> Calculated (Da) | MH <sup>+</sup> Error (Da) | MH <sup>+</sup> Error (ppm) | Protein MW/pI (Da) | Species | Accession # | Protein Name                                                               |
|------|-------|---------|-----|------------------|----------------|----------------------------|---------------------------------|----------------------------|-----------------------------|--------------------|---------|-------------|----------------------------------------------------------------------------|
| 1    | 15.02 | 80.2    | 7   | 5/25             | K502k          | (R)ELQELVQYPVEHPDKFLK(F)   | 2212.1648                       | 114.0581                   | 6.5                         | 89322.3/5.14       | HUMAN   | P55072      | Transitional endoplasmic reticulum ATPase OS=Homo sapiens GN=VCP PE=1 SV=4 |
| 2    | 13.23 | 75.1    | 6   | 6/25             | K505k          | (R)ELQELVQYPVEHPDKFLK(F)   | 2212.1648                       | 114.0581                   | 6.5                         | 89322.3/5.14       | HUMAN   | P55072      | Transitional endoplasmic reticulum ATPase OS=Homo sapiens GN=VCP PE=1 SV=4 |
| 3    | 7.05  | 52.6    | 2   | 11/25            | M829m          | (R)LSQELDLGmEVPHEVKKAMR(I) | 2310.1944                       | 16.0285                    | 14.4                        | 102837.1/7.88      | HUMAN   | RQ7Z7L1     | REVERSE Schlafen family member 11 OS=Homo sapiens GN=SLFN11 PE=1 SV=1      |

Detailed Results

| Rank | Score | SPI (%) | BCS | # Unmatched Ions | Variable sites | Sequence                                   | MH <sup>+</sup> Calculated (Da) | MH <sup>+</sup> Error (Da) | MH <sup>+</sup> Error (ppm) | Protein MW/pI (Da) | Species | Accession # | MS-Digest Index # | Protein Name                                                               |
|------|-------|---------|-----|------------------|----------------|--------------------------------------------|---------------------------------|----------------------------|-----------------------------|--------------------|---------|-------------|-------------------|----------------------------------------------------------------------------|
| 1    | 15.02 | 80.2    | 7   | 5/25             | K502k          | (R)E L Q E L V Q Y P V E H P D K F L K (F) | 2212.1648                       | 114.0581                   | 6.5                         | 89322.3/5.14       | HUMAN   | P55072      | 773751            | Transitional endoplasmic reticulum ATPase OS=Homo sapiens GN=VCP PE=1 SV=4 |

  

| Fragment-Ion (m/z)     | 70.063 | 72.080 | 84.079 | 86.095 | 101.069 | 110.067 | 129.095 | 136.074 | 147.109 | 173.128 | 197.126 | 241.076 | 243.135 | 353.180 | 371.192 | 435.254 | 441.921 <sup>+3</sup> | 482.221 | 595.294 | 613.322 <sup>+2</sup> | 649.395 | 662.354 <sup>+2</sup> | 743.890 <sup>+2</sup> | 799.416 <sup>+2</sup> | 861.484 |     |
|------------------------|--------|--------|--------|--------|---------|---------|---------|---------|---------|---------|---------|---------|---------|---------|---------|---------|-----------------------|---------|---------|-----------------------|---------|-----------------------|-----------------------|-----------------------|---------|-----|
| Frac. Inten.(% of TIC) | 0.01   | 0.33   | 0.58   | 0.41   | 0.19    | 0.18    | 5.37    | 0.55    | 5.03    | 3.33    | 6.28    | 3.20    | 3.89    | 4.34    | 5.26    | 3.66    | 4.56                  | 5.33    | 3.45    | 4.26                  | 3.32    | 17.19                 | 5.04                  | 5.25                  | 8.99    |     |
| Rel. Inten.(% of BP)   | 0.03   | 1.93   | 3.36   | 2.41   | 1.09    | 1.06    | 31.24   | 3.19    | 29.28   | 19.36   | 36.52   | 18.63   | 22.66   | 25.28   | 30.60   | 21.32   | 26.51                 | 31.03   | 20.05   | 24.81                 | 19.34   | 100.00                | 29.32                 | 30.54                 | 52.30   |     |
| Score                  | 0.20   | 0.50   | 0.50   | 0.22   | 1.00    | 1.00    | -0.31   | 1.00    | 1.50    | -0.19   | 0.75    | 0.75    | 0.75    | 0.50    | 0.75    | -0.21   | 1.50                  | 0.25    | 0.25    | 1.50                  | 1.50    | 1.50                  | 1.50                  | 0.50                  | 1.50    |     |
| Ion-type               | PR     | V      | KQ     | LI     | KQ      | H       |         | Y       | y1      |         | PV      |         | b2      | b3-H2O  | b3      |         | y10 <sup>+3</sup>     | b4-H2O  | b5-H2O  |                       | y4      | y10 <sup>+2</sup>     | y11 <sup>+2</sup>     | y12-NH3 <sup>+2</sup> | y6      |     |
| Delta ppm              | -33.2  | -5.2   | -15.2  | -11.9  |         | -36.1   |         | -13.2   | -25.2   |         | -15.5   |         |         | -0.1    | EL      | QEL     |                       |         |         |                       |         | -12.0                 |                       |                       |         | 1.1 |

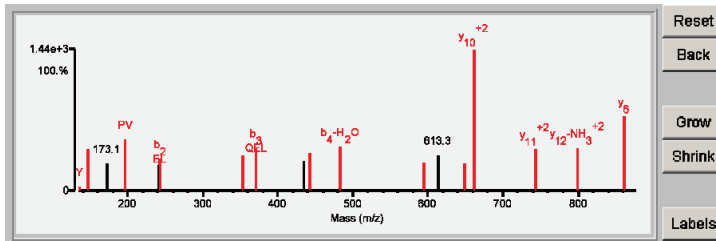

Reset

Back

Grow

Shrink

Labels

Result Summary

| Rank | Score | SPI (%) | BCS | # Unmatched Ions | Variable sites | Sequence                                           | MH <sup>+</sup> Calculated (Da) | MH <sup>+</sup> Error (Da) | MH <sup>+</sup> Error (ppm) | Protein MW/pl (Da) | Species | Accession # | Protein Name                                                               |
|------|-------|---------|-----|------------------|----------------|----------------------------------------------------|---------------------------------|----------------------------|-----------------------------|--------------------|---------|-------------|----------------------------------------------------------------------------|
| 1    | 11.09 | 60.8    | 6   | 10/25            | K524k          | (K)GVLFYGP <del>P</del> PGCGKTL <del>L</del> AK(A) | 1777.9669                       | 114.0565                   | 7.2                         | 89322.3/5.14       | HUMAN   | P55072      | Transitional endoplasmic reticulum ATPase OS=Homo sapiens GN=VCP PE=1 SV=4 |
| 2    | 9.39  | 57.5    | 5   | 11/25            | K529k          | (K)GVLFYGP <del>P</del> PGCGKTL <del>L</del> AK(A) | 1777.9669                       | 114.0565                   | 7.2                         | 89322.3/5.14       | HUMAN   | P55072      | Transitional endoplasmic reticulum ATPase OS=Homo sapiens GN=VCP PE=1 SV=4 |

Detailed Results

| Rank                                                                                                                                                                                                                                                                                                                                                                                                                                                                                                                                                                                                                                                                                                                                                                                                                                                                                                                                                                                                                                                                                                                                                                                                                                                                                                                                                                                                                                                                                                                                                                                                                                                                                                                                                                                                                                                                                                                                                                                                                                                                                                                                                                                                                                                                                                                                                                                                                                                                                                                                                                                                            | Score  | SPI (%) | BCS    | # Unmatched Ions | Variable sites | Sequence                                   | MH <sup>+</sup> Calculated (Da) | MH <sup>+</sup> Error (Da) | MH <sup>+</sup> Error (ppm) | Protein MW/pl (Da) | Species        | Accession #   | MS-Digest Index # | Protein Name                                                               |                       |         |         |         |                               |                  |         |                               |         |                       |          |         |         |         |         |                       |         |         |         |                       |         |         |                       |         |                       |          |                         |      |      |      |      |      |      |      |      |      |      |      |      |      |      |      |      |      |      |      |      |      |       |      |      |      |                       |       |      |      |      |       |       |      |       |       |       |       |       |       |       |       |       |       |       |       |       |       |        |       |       |       |       |       |      |      |      |      |      |      |      |      |       |      |       |      |       |      |       |      |       |      |      |       |      |       |       |      |          |  |   |    |   |       |                |   |    |                |                |                |  |  |  |  |  |  |  |                               |                  |  |                               |  |                 |           |  |     |     |      |       |       |      |      |       |       |     |  |  |  |  |  |  |  |     |       |  |      |  |     |
|-----------------------------------------------------------------------------------------------------------------------------------------------------------------------------------------------------------------------------------------------------------------------------------------------------------------------------------------------------------------------------------------------------------------------------------------------------------------------------------------------------------------------------------------------------------------------------------------------------------------------------------------------------------------------------------------------------------------------------------------------------------------------------------------------------------------------------------------------------------------------------------------------------------------------------------------------------------------------------------------------------------------------------------------------------------------------------------------------------------------------------------------------------------------------------------------------------------------------------------------------------------------------------------------------------------------------------------------------------------------------------------------------------------------------------------------------------------------------------------------------------------------------------------------------------------------------------------------------------------------------------------------------------------------------------------------------------------------------------------------------------------------------------------------------------------------------------------------------------------------------------------------------------------------------------------------------------------------------------------------------------------------------------------------------------------------------------------------------------------------------------------------------------------------------------------------------------------------------------------------------------------------------------------------------------------------------------------------------------------------------------------------------------------------------------------------------------------------------------------------------------------------------------------------------------------------------------------------------------------------|--------|---------|--------|------------------|----------------|--------------------------------------------|---------------------------------|----------------------------|-----------------------------|--------------------|----------------|---------------|-------------------|----------------------------------------------------------------------------|-----------------------|---------|---------|---------|-------------------------------|------------------|---------|-------------------------------|---------|-----------------------|----------|---------|---------|---------|---------|-----------------------|---------|---------|---------|-----------------------|---------|---------|-----------------------|---------|-----------------------|----------|-------------------------|------|------|------|------|------|------|------|------|------|------|------|------|------|------|------|------|------|------|------|------|------|-------|------|------|------|-----------------------|-------|------|------|------|-------|-------|------|-------|-------|-------|-------|-------|-------|-------|-------|-------|-------|-------|-------|-------|-------|--------|-------|-------|-------|-------|-------|------|------|------|------|------|------|------|------|-------|------|-------|------|-------|------|-------|------|-------|------|------|-------|------|-------|-------|------|----------|--|---|----|---|-------|----------------|---|----|----------------|----------------|----------------|--|--|--|--|--|--|--|-------------------------------|------------------|--|-------------------------------|--|-----------------|-----------|--|-----|-----|------|-------|-------|------|------|-------|-------|-----|--|--|--|--|--|--|--|-----|-------|--|------|--|-----|
| 1                                                                                                                                                                                                                                                                                                                                                                                                                                                                                                                                                                                                                                                                                                                                                                                                                                                                                                                                                                                                                                                                                                                                                                                                                                                                                                                                                                                                                                                                                                                                                                                                                                                                                                                                                                                                                                                                                                                                                                                                                                                                                                                                                                                                                                                                                                                                                                                                                                                                                                                                                                                                               | 11.09  | 60.8    | 6      | 10/25            | K524k          | (K)G V L V F Y G P P G C G K T L L A K (A) | 1777.9669                       | 114.0565                   | 7.2                         | 89322.3/5.14       | HUMAN          | P55072 773751 |                   | Transitional endoplasmic reticulum ATPase OS=Homo sapiens GN=VCP PE=1 SV=4 |                       |         |         |         |                               |                  |         |                               |         |                       |          |         |         |         |         |                       |         |         |         |                       |         |         |                       |         |                       |          |                         |      |      |      |      |      |      |      |      |      |      |      |      |      |      |      |      |      |      |      |      |      |       |      |      |      |                       |       |      |      |      |       |       |      |       |       |       |       |       |       |       |       |       |       |       |       |       |       |        |       |       |       |       |       |      |      |      |      |      |      |      |      |       |      |       |      |       |      |       |      |       |      |      |       |      |       |       |      |          |  |   |    |   |       |                |   |    |                |                |                |  |  |  |  |  |  |  |                               |                  |  |                               |  |                 |           |  |     |     |      |       |       |      |      |       |       |     |  |  |  |  |  |  |  |     |       |  |      |  |     |
| <table border="1"> <thead> <tr> <th>Fragment-ion (m/z)</th> <th>70.060</th> <th>72.081</th> <th>86.097</th> <th>120.081</th> <th>127.083</th> <th>129.100</th> <th>136.076</th> <th>155.084</th> <th>157.094</th> <th>173.130</th> <th>218.146</th> <th>233.172</th> <th>270.183</th> <th>372.224</th> <th>401.145<sup>+2</sup></th> <th>417.250</th> <th>486.188</th> <th>576.328</th> <th>579.821<sup>+2</sup></th> <th>656.849</th> <th>657.367</th> <th>738.396<sup>+2</sup></th> <th>811.363</th> <th>812.436<sup>+2</sup></th> <th>1158.638</th> </tr> </thead> <tbody> <tr> <td>Frac. Inten. (% of TIC)</td> <td>2.75</td> <td>0.17</td> <td>0.63</td> <td>0.20</td> <td>3.92</td> <td>7.29</td> <td>0.08</td> <td>3.55</td> <td>4.34</td> <td>2.48</td> <td>3.33</td> <td>3.59</td> <td>4.65</td> <td>4.45</td> <td>4.46</td> <td>2.90</td> <td>2.82</td> <td>3.18</td> <td>3.38</td> <td>5.15</td> <td>6.18</td> <td>16.46</td> <td>2.60</td> <td>6.71</td> <td>4.74</td> </tr> <tr> <td>Rel. Inten. (% of BP)</td> <td>16.68</td> <td>1.01</td> <td>3.86</td> <td>1.19</td> <td>23.84</td> <td>44.29</td> <td>0.47</td> <td>21.54</td> <td>26.38</td> <td>15.06</td> <td>20.22</td> <td>21.84</td> <td>28.24</td> <td>27.04</td> <td>27.06</td> <td>17.61</td> <td>17.13</td> <td>19.31</td> <td>20.52</td> <td>31.27</td> <td>37.54</td> <td>100.00</td> <td>15.77</td> <td>40.74</td> <td>28.81</td> </tr> <tr> <td>Score</td> <td>-0.17</td> <td>0.50</td> <td>0.22</td> <td>1.00</td> <td>0.50</td> <td>0.50</td> <td>1.00</td> <td>0.75</td> <td>0.50</td> <td>-0.15</td> <td>1.50</td> <td>-0.22</td> <td>0.50</td> <td>-0.27</td> <td>0.50</td> <td>-0.27</td> <td>0.50</td> <td>-0.19</td> <td>1.50</td> <td>1.50</td> <td>-0.38</td> <td>1.50</td> <td>-0.16</td> <td>-0.41</td> <td>1.50</td> </tr> <tr> <td>Ion-type</td> <td></td> <td>V</td> <td>LI</td> <td>F</td> <td>PG-28</td> <td>b<sub>2</sub></td> <td>Y</td> <td>PG</td> <td>b<sub>2</sub></td> <td>y<sub>2</sub></td> <td>b<sub>3</sub></td> <td></td> <td></td> <td></td> <td></td> <td></td> <td></td> <td></td> <td>y<sub>10</sub><sup>+2</sup></td> <td>y<sup>+12</sup></td> <td></td> <td>y<sub>13</sub><sup>+2</sup></td> <td></td> <td>y<sub>10</sub></td> </tr> <tr> <td>Delta ppm</td> <td></td> <td>4.5</td> <td>0.9</td> <td>-1.5</td> <td>-34.5</td> <td>-25.1</td> <td>-0.7</td> <td>10.3</td> <td>-25.2</td> <td>-16.6</td> <td>1.1</td> <td></td> <td></td> <td></td> <td></td> <td></td> <td></td> <td></td> <td>3.6</td> <td>-10.5</td> <td></td> <td>11.3</td> <td></td> <td>6.7</td> </tr> </tbody> </table> |        |         |        |                  |                |                                            |                                 |                            |                             |                    |                |               |                   |                                                                            | Fragment-ion (m/z)    | 70.060  | 72.081  | 86.097  | 120.081                       | 127.083          | 129.100 | 136.076                       | 155.084 | 157.094               | 173.130  | 218.146 | 233.172 | 270.183 | 372.224 | 401.145 <sup>+2</sup> | 417.250 | 486.188 | 576.328 | 579.821 <sup>+2</sup> | 656.849 | 657.367 | 738.396 <sup>+2</sup> | 811.363 | 812.436 <sup>+2</sup> | 1158.638 | Frac. Inten. (% of TIC) | 2.75 | 0.17 | 0.63 | 0.20 | 3.92 | 7.29 | 0.08 | 3.55 | 4.34 | 2.48 | 3.33 | 3.59 | 4.65 | 4.45 | 4.46 | 2.90 | 2.82 | 3.18 | 3.38 | 5.15 | 6.18 | 16.46 | 2.60 | 6.71 | 4.74 | Rel. Inten. (% of BP) | 16.68 | 1.01 | 3.86 | 1.19 | 23.84 | 44.29 | 0.47 | 21.54 | 26.38 | 15.06 | 20.22 | 21.84 | 28.24 | 27.04 | 27.06 | 17.61 | 17.13 | 19.31 | 20.52 | 31.27 | 37.54 | 100.00 | 15.77 | 40.74 | 28.81 | Score | -0.17 | 0.50 | 0.22 | 1.00 | 0.50 | 0.50 | 1.00 | 0.75 | 0.50 | -0.15 | 1.50 | -0.22 | 0.50 | -0.27 | 0.50 | -0.27 | 0.50 | -0.19 | 1.50 | 1.50 | -0.38 | 1.50 | -0.16 | -0.41 | 1.50 | Ion-type |  | V | LI | F | PG-28 | b <sub>2</sub> | Y | PG | b <sub>2</sub> | y <sub>2</sub> | b <sub>3</sub> |  |  |  |  |  |  |  | y <sub>10</sub> <sup>+2</sup> | y <sup>+12</sup> |  | y <sub>13</sub> <sup>+2</sup> |  | y <sub>10</sub> | Delta ppm |  | 4.5 | 0.9 | -1.5 | -34.5 | -25.1 | -0.7 | 10.3 | -25.2 | -16.6 | 1.1 |  |  |  |  |  |  |  | 3.6 | -10.5 |  | 11.3 |  | 6.7 |
| Fragment-ion (m/z)                                                                                                                                                                                                                                                                                                                                                                                                                                                                                                                                                                                                                                                                                                                                                                                                                                                                                                                                                                                                                                                                                                                                                                                                                                                                                                                                                                                                                                                                                                                                                                                                                                                                                                                                                                                                                                                                                                                                                                                                                                                                                                                                                                                                                                                                                                                                                                                                                                                                                                                                                                                              | 70.060 | 72.081  | 86.097 | 120.081          | 127.083        | 129.100                                    | 136.076                         | 155.084                    | 157.094                     | 173.130            | 218.146        | 233.172       | 270.183           | 372.224                                                                    | 401.145 <sup>+2</sup> | 417.250 | 486.188 | 576.328 | 579.821 <sup>+2</sup>         | 656.849          | 657.367 | 738.396 <sup>+2</sup>         | 811.363 | 812.436 <sup>+2</sup> | 1158.638 |         |         |         |         |                       |         |         |         |                       |         |         |                       |         |                       |          |                         |      |      |      |      |      |      |      |      |      |      |      |      |      |      |      |      |      |      |      |      |      |       |      |      |      |                       |       |      |      |      |       |       |      |       |       |       |       |       |       |       |       |       |       |       |       |       |       |        |       |       |       |       |       |      |      |      |      |      |      |      |      |       |      |       |      |       |      |       |      |       |      |      |       |      |       |       |      |          |  |   |    |   |       |                |   |    |                |                |                |  |  |  |  |  |  |  |                               |                  |  |                               |  |                 |           |  |     |     |      |       |       |      |      |       |       |     |  |  |  |  |  |  |  |     |       |  |      |  |     |
| Frac. Inten. (% of TIC)                                                                                                                                                                                                                                                                                                                                                                                                                                                                                                                                                                                                                                                                                                                                                                                                                                                                                                                                                                                                                                                                                                                                                                                                                                                                                                                                                                                                                                                                                                                                                                                                                                                                                                                                                                                                                                                                                                                                                                                                                                                                                                                                                                                                                                                                                                                                                                                                                                                                                                                                                                                         | 2.75   | 0.17    | 0.63   | 0.20             | 3.92           | 7.29                                       | 0.08                            | 3.55                       | 4.34                        | 2.48               | 3.33           | 3.59          | 4.65              | 4.45                                                                       | 4.46                  | 2.90    | 2.82    | 3.18    | 3.38                          | 5.15             | 6.18    | 16.46                         | 2.60    | 6.71                  | 4.74     |         |         |         |         |                       |         |         |         |                       |         |         |                       |         |                       |          |                         |      |      |      |      |      |      |      |      |      |      |      |      |      |      |      |      |      |      |      |      |      |       |      |      |      |                       |       |      |      |      |       |       |      |       |       |       |       |       |       |       |       |       |       |       |       |       |       |        |       |       |       |       |       |      |      |      |      |      |      |      |      |       |      |       |      |       |      |       |      |       |      |      |       |      |       |       |      |          |  |   |    |   |       |                |   |    |                |                |                |  |  |  |  |  |  |  |                               |                  |  |                               |  |                 |           |  |     |     |      |       |       |      |      |       |       |     |  |  |  |  |  |  |  |     |       |  |      |  |     |
| Rel. Inten. (% of BP)                                                                                                                                                                                                                                                                                                                                                                                                                                                                                                                                                                                                                                                                                                                                                                                                                                                                                                                                                                                                                                                                                                                                                                                                                                                                                                                                                                                                                                                                                                                                                                                                                                                                                                                                                                                                                                                                                                                                                                                                                                                                                                                                                                                                                                                                                                                                                                                                                                                                                                                                                                                           | 16.68  | 1.01    | 3.86   | 1.19             | 23.84          | 44.29                                      | 0.47                            | 21.54                      | 26.38                       | 15.06              | 20.22          | 21.84         | 28.24             | 27.04                                                                      | 27.06                 | 17.61   | 17.13   | 19.31   | 20.52                         | 31.27            | 37.54   | 100.00                        | 15.77   | 40.74                 | 28.81    |         |         |         |         |                       |         |         |         |                       |         |         |                       |         |                       |          |                         |      |      |      |      |      |      |      |      |      |      |      |      |      |      |      |      |      |      |      |      |      |       |      |      |      |                       |       |      |      |      |       |       |      |       |       |       |       |       |       |       |       |       |       |       |       |       |       |        |       |       |       |       |       |      |      |      |      |      |      |      |      |       |      |       |      |       |      |       |      |       |      |      |       |      |       |       |      |          |  |   |    |   |       |                |   |    |                |                |                |  |  |  |  |  |  |  |                               |                  |  |                               |  |                 |           |  |     |     |      |       |       |      |      |       |       |     |  |  |  |  |  |  |  |     |       |  |      |  |     |
| Score                                                                                                                                                                                                                                                                                                                                                                                                                                                                                                                                                                                                                                                                                                                                                                                                                                                                                                                                                                                                                                                                                                                                                                                                                                                                                                                                                                                                                                                                                                                                                                                                                                                                                                                                                                                                                                                                                                                                                                                                                                                                                                                                                                                                                                                                                                                                                                                                                                                                                                                                                                                                           | -0.17  | 0.50    | 0.22   | 1.00             | 0.50           | 0.50                                       | 1.00                            | 0.75                       | 0.50                        | -0.15              | 1.50           | -0.22         | 0.50              | -0.27                                                                      | 0.50                  | -0.27   | 0.50    | -0.19   | 1.50                          | 1.50             | -0.38   | 1.50                          | -0.16   | -0.41                 | 1.50     |         |         |         |         |                       |         |         |         |                       |         |         |                       |         |                       |          |                         |      |      |      |      |      |      |      |      |      |      |      |      |      |      |      |      |      |      |      |      |      |       |      |      |      |                       |       |      |      |      |       |       |      |       |       |       |       |       |       |       |       |       |       |       |       |       |       |        |       |       |       |       |       |      |      |      |      |      |      |      |      |       |      |       |      |       |      |       |      |       |      |      |       |      |       |       |      |          |  |   |    |   |       |                |   |    |                |                |                |  |  |  |  |  |  |  |                               |                  |  |                               |  |                 |           |  |     |     |      |       |       |      |      |       |       |     |  |  |  |  |  |  |  |     |       |  |      |  |     |
| Ion-type                                                                                                                                                                                                                                                                                                                                                                                                                                                                                                                                                                                                                                                                                                                                                                                                                                                                                                                                                                                                                                                                                                                                                                                                                                                                                                                                                                                                                                                                                                                                                                                                                                                                                                                                                                                                                                                                                                                                                                                                                                                                                                                                                                                                                                                                                                                                                                                                                                                                                                                                                                                                        |        | V       | LI     | F                | PG-28          | b <sub>2</sub>                             | Y                               | PG                         | b <sub>2</sub>              | y <sub>2</sub>     | b <sub>3</sub> |               |                   |                                                                            |                       |         |         |         | y <sub>10</sub> <sup>+2</sup> | y <sup>+12</sup> |         | y <sub>13</sub> <sup>+2</sup> |         | y <sub>10</sub>       |          |         |         |         |         |                       |         |         |         |                       |         |         |                       |         |                       |          |                         |      |      |      |      |      |      |      |      |      |      |      |      |      |      |      |      |      |      |      |      |      |       |      |      |      |                       |       |      |      |      |       |       |      |       |       |       |       |       |       |       |       |       |       |       |       |       |       |        |       |       |       |       |       |      |      |      |      |      |      |      |      |       |      |       |      |       |      |       |      |       |      |      |       |      |       |       |      |          |  |   |    |   |       |                |   |    |                |                |                |  |  |  |  |  |  |  |                               |                  |  |                               |  |                 |           |  |     |     |      |       |       |      |      |       |       |     |  |  |  |  |  |  |  |     |       |  |      |  |     |
| Delta ppm                                                                                                                                                                                                                                                                                                                                                                                                                                                                                                                                                                                                                                                                                                                                                                                                                                                                                                                                                                                                                                                                                                                                                                                                                                                                                                                                                                                                                                                                                                                                                                                                                                                                                                                                                                                                                                                                                                                                                                                                                                                                                                                                                                                                                                                                                                                                                                                                                                                                                                                                                                                                       |        | 4.5     | 0.9    | -1.5             | -34.5          | -25.1                                      | -0.7                            | 10.3                       | -25.2                       | -16.6              | 1.1            |               |                   |                                                                            |                       |         |         |         | 3.6                           | -10.5            |         | 11.3                          |         | 6.7                   |          |         |         |         |         |                       |         |         |         |                       |         |         |                       |         |                       |          |                         |      |      |      |      |      |      |      |      |      |      |      |      |      |      |      |      |      |      |      |      |      |       |      |      |      |                       |       |      |      |      |       |       |      |       |       |       |       |       |       |       |       |       |       |       |       |       |       |        |       |       |       |       |       |      |      |      |      |      |      |      |      |       |      |       |      |       |      |       |      |       |      |      |       |      |       |       |      |          |  |   |    |   |       |                |   |    |                |                |                |  |  |  |  |  |  |  |                               |                  |  |                               |  |                 |           |  |     |     |      |       |       |      |      |       |       |     |  |  |  |  |  |  |  |     |       |  |      |  |     |

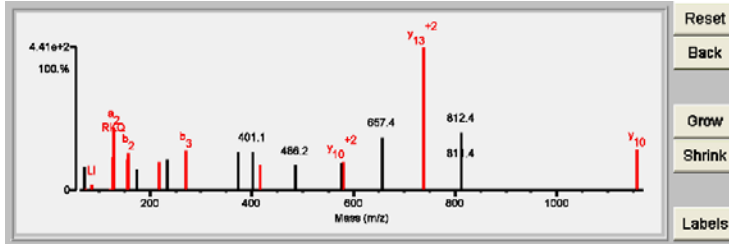

Result Summary

| Rank | Score | SPI (%) | BCS | # Unmatched ions | # Variable sites | Sequence             | MH <sup>+</sup> Calculated (Da) | MH <sup>+</sup> Error (Da) | MH <sup>+</sup> Error (ppm) | Protein MW/pI (Da) | Species | Accession # | Protein Name                                                               |
|------|-------|---------|-----|------------------|------------------|----------------------|---------------------------------|----------------------------|-----------------------------|--------------------|---------|-------------|----------------------------------------------------------------------------|
| 1    | 12.14 | 71.5    | 8   | 9/25             | K651k            | (R)LDQLIYIPLPEKSR(V) | 1799.9902                       | 114.0470                   | 2.1                         | 89322.3/5.14       | HUMAN   | P55072      | Transitional endoplasmic reticulum ATPase OS=Homo sapiens GN=VCP PE=1 SV=4 |

Detailed Results

| Rank                    | Score  | SPI (%) | BCS    | # Unmatched ions | # Variable sites | Sequence             | MH <sup>+</sup> Calculated (Da) | MH <sup>+</sup> Error (Da) | MH <sup>+</sup> Error (ppm) | Protein MW/pI (Da) | Species        | Accession # | MS-Digest Index # | Protein Name                                                               |                  |                |                              |         |                |                       |         |                |                |                |                |
|-------------------------|--------|---------|--------|------------------|------------------|----------------------|---------------------------------|----------------------------|-----------------------------|--------------------|----------------|-------------|-------------------|----------------------------------------------------------------------------|------------------|----------------|------------------------------|---------|----------------|-----------------------|---------|----------------|----------------|----------------|----------------|
| 1                       | 12.14  | 71.5    | 8      | 9/25             | K651k            | (R)LDQLIYIPLPEKSR(V) | 1799.9902                       | 114.0470                   | 2.1                         | 89322.3/5.14       | HUMAN          | P55072      | 773751            | Transitional endoplasmic reticulum ATPase OS=Homo sapiens GN=VCP PE=1 SV=4 |                  |                |                              |         |                |                       |         |                |                |                |                |
| Fragment-ion (m/z)      | 70.066 | 72.080  | 84.079 | 86.097           | 110.067          | 120.078              | 136.079                         | 157.131                    | 175.121                     | 228.138            | 229.112        | 276.137     | 357.178           | 423.211 <sup>+2</sup>                                                      | 430.251          | 470.266        | 528.290                      | 528.769 | 583.340        | 606.948 <sup>+3</sup> | 742.887 | 746.400        | 845.412        | 859.520        | 1055.549       |
| Frac. Inten. (% of TIC) | 0.01   | 2.79    | 0.26   | 15.78            | 4.51             | 5.36                 | 0.12                            | 2.21                       | 2.20                        | 3.30               | 2.50           | 2.34        | 4.55              | 7.89                                                                       | 2.37             | 2.78           | 2.93                         | 2.29    | 2.68           | 3.45                  | 2.26    | 6.31           | 12.46          | 3.32           | 5.34           |
| Rel. Inten. (% of BP)   | 0.05   | 17.69   | 1.68   | 100.00           | 28.59            | 34.00                | 0.78                            | 14.01                      | 13.92                       | 20.89              | 15.87          | 14.82       | 28.81             | 50.02                                                                      | 15.04            | 17.60          | 18.57                        | 14.50   | 16.99          | 21.85                 | 14.32   | 40.00          | 78.94          | 21.05          | 33.84          |
| Score                   | 0.20   | -0.18   | 0.50   | 0.50             | -0.29            | -0.34                | 1.00                            | -0.14                      | 1.50                        | -0.21              | 0.50           | -0.15       | 0.75              | 1.50                                                                       | 0.50             | 0.75           | 1.50                         | -0.15   | 0.50           | -0.22                 | -0.14   | 0.75           | 1.50           | 0.50           | 1.50           |
| Ion-type                | PR     |         | KQ     | a <sub>1</sub>   |                  |                      | Y                               |                            | y <sub>1</sub>              |                    | b <sub>2</sub> |             | b <sub>3</sub>    | y <sub>6</sub> <sup>+2</sup>                                               | b <sub>3</sub> + | b <sub>4</sub> | y <sub>6</sub> <sup>+8</sup> |         | b <sub>5</sub> |                       |         | b <sub>6</sub> | y <sub>6</sub> | b <sub>7</sub> | y <sub>8</sub> |
| Delta ppm               | 15.3   |         | -23.5  | -10.7            | 0.50             |                      | 23.6                            |                            | 13.4                        |                    | -32.7          |             | -0.7              | 4.0                                                                        | 2.4              |                | 23.4                         |         | -10.9          |                       |         | DQLI           | 1.5            | 30.4           | 0.9            |
|                         |        |         |        | LI               | 2.0              |                      |                                 |                            |                             |                    |                |             | DQL               | -0.7                                                                       |                  | DQLI           | 9.1                          |         |                |                       |         | DQLI           | -12.2          |                |                |

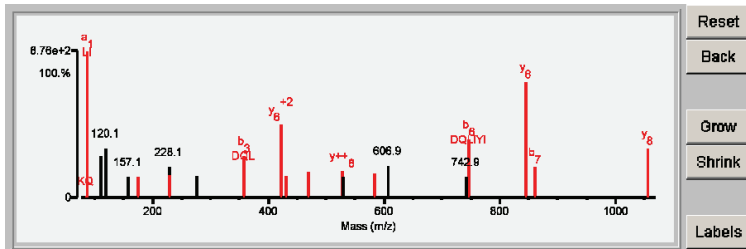



Result Summary

| Rank | Score | SPI (%) | BCS | # Unmatched Ions | # Variable sites | Sequence        | MH <sup>+</sup> Calculated (Da) | MH <sup>+</sup> Error (Da) | MH <sup>+</sup> Error (ppm) | Protein MW/pl (Da) | Species | Accession # | Protein Name                                                               |
|------|-------|---------|-----|------------------|------------------|-----------------|---------------------------------|----------------------------|-----------------------------|--------------------|---------|-------------|----------------------------------------------------------------------------|
| 1    | 11.60 | 61.0    | 7   | 10/24            | K658K            | (R)VAILKANLR(K) | 997.6517                        | 114.0457                   | 2.5                         | 89322.3/5.14       | HUMAN   | P55072      | Transitional endoplasmic reticulum ATPase OS=Homo sapiens GN=VCP PE=1 SV=4 |

Detailed Results

| Rank                                                                                                                                                                                                                                                                                                                                                                                                                                                                                                                                                                                                                                                                                                                                                                                                                                                                                                                                                                                                                                                                                                                                                                                                                                                                                                                                                                                                                                                                                                                                                                                                                                                                                                                                                                                                                                                                                                                                                                                                                                                                                                                                                                                                                                                                                                                                                                                                                                                                                                                                | Score  | SPI (%)        | BCS    | # Unmatched Ions | # Variable sites | Sequence                                | MH <sup>+</sup> Calculated (Da) | MH <sup>+</sup> Error (Da) | MH <sup>+</sup> Error (ppm) | Protein MW/pl (Da) | Species | Accession #    | MS-Digest Index # | Protein Name                                                               |                    |                |                       |                       |                |                              |                |                |                |         |         |         |         |         |         |         |         |                       |                       |         |                       |         |         |         |         |                         |      |      |       |      |      |      |      |      |      |      |      |      |      |      |      |      |      |      |      |      |       |      |      |      |                       |      |      |        |      |      |       |       |      |       |       |       |      |       |      |       |       |      |       |       |       |       |       |      |       |       |      |      |       |      |      |       |       |      |       |      |       |      |      |       |       |      |       |       |      |      |      |      |       |      |          |    |                |  |    |    |  |  |     |  |                |  |                |                |  |  |                |  |  |                |                              |                |                |                |  |           |     |       |      |      |      |  |  |     |  |       |  |       |     |  |  |     |  |  |     |     |     |      |  |     |
|-------------------------------------------------------------------------------------------------------------------------------------------------------------------------------------------------------------------------------------------------------------------------------------------------------------------------------------------------------------------------------------------------------------------------------------------------------------------------------------------------------------------------------------------------------------------------------------------------------------------------------------------------------------------------------------------------------------------------------------------------------------------------------------------------------------------------------------------------------------------------------------------------------------------------------------------------------------------------------------------------------------------------------------------------------------------------------------------------------------------------------------------------------------------------------------------------------------------------------------------------------------------------------------------------------------------------------------------------------------------------------------------------------------------------------------------------------------------------------------------------------------------------------------------------------------------------------------------------------------------------------------------------------------------------------------------------------------------------------------------------------------------------------------------------------------------------------------------------------------------------------------------------------------------------------------------------------------------------------------------------------------------------------------------------------------------------------------------------------------------------------------------------------------------------------------------------------------------------------------------------------------------------------------------------------------------------------------------------------------------------------------------------------------------------------------------------------------------------------------------------------------------------------------|--------|----------------|--------|------------------|------------------|-----------------------------------------|---------------------------------|----------------------------|-----------------------------|--------------------|---------|----------------|-------------------|----------------------------------------------------------------------------|--------------------|----------------|-----------------------|-----------------------|----------------|------------------------------|----------------|----------------|----------------|---------|---------|---------|---------|---------|---------|---------|---------|-----------------------|-----------------------|---------|-----------------------|---------|---------|---------|---------|-------------------------|------|------|-------|------|------|------|------|------|------|------|------|------|------|------|------|------|------|------|------|------|-------|------|------|------|-----------------------|------|------|--------|------|------|-------|-------|------|-------|-------|-------|------|-------|------|-------|-------|------|-------|-------|-------|-------|-------|------|-------|-------|------|------|-------|------|------|-------|-------|------|-------|------|-------|------|------|-------|-------|------|-------|-------|------|------|------|------|-------|------|----------|----|----------------|--|----|----|--|--|-----|--|----------------|--|----------------|----------------|--|--|----------------|--|--|----------------|------------------------------|----------------|----------------|----------------|--|-----------|-----|-------|------|------|------|--|--|-----|--|-------|--|-------|-----|--|--|-----|--|--|-----|-----|-----|------|--|-----|
| 1                                                                                                                                                                                                                                                                                                                                                                                                                                                                                                                                                                                                                                                                                                                                                                                                                                                                                                                                                                                                                                                                                                                                                                                                                                                                                                                                                                                                                                                                                                                                                                                                                                                                                                                                                                                                                                                                                                                                                                                                                                                                                                                                                                                                                                                                                                                                                                                                                                                                                                                                   | 11.60  | 61.0           | 7      | 10/24            | K658K            | (R) V A \ I / L / K / A / N / L / R (K) | 997.6517                        | 114.0457                   | 2.5                         | 89322.3/5.14       | HUMAN   | P55072         | 386876            | Transitional endoplasmic reticulum ATPase OS=Homo sapiens GN=VCP PE=1 SV=4 |                    |                |                       |                       |                |                              |                |                |                |         |         |         |         |         |         |         |         |                       |                       |         |                       |         |         |         |         |                         |      |      |       |      |      |      |      |      |      |      |      |      |      |      |      |      |      |      |      |      |       |      |      |      |                       |      |      |        |      |      |       |       |      |       |       |       |      |       |      |       |       |      |       |       |       |       |       |      |       |       |      |      |       |      |      |       |       |      |       |      |       |      |      |       |       |      |       |       |      |      |      |      |       |      |          |    |                |  |    |    |  |  |     |  |                |  |                |                |  |  |                |  |  |                |                              |                |                |                |  |           |     |       |      |      |      |  |  |     |  |       |  |       |     |  |  |     |  |  |     |     |     |      |  |     |
| <table border="1"> <thead> <tr> <th>Fragment-ion (m/z)</th> <th>70.066</th> <th>72.081</th> <th>84.081</th> <th>86.096</th> <th>87.058</th> <th>87.097</th> <th>120.081</th> <th>129.102</th> <th>141.102</th> <th>143.117</th> <th>157.133</th> <th>171.112</th> <th>175.119</th> <th>186.102</th> <th>199.178</th> <th>288.205</th> <th>329.700<sup>+2</sup></th> <th>386.242<sup>+2</sup></th> <th>402.246</th> <th>414.760<sup>+2</sup></th> <th>473.283</th> <th>715.428</th> <th>771.482</th> <th>828.511</th> </tr> </thead> <tbody> <tr> <td>Frac. Inten. (% of TIC)</td> <td>0.00</td> <td>1.20</td> <td>21.04</td> <td>1.04</td> <td>0.06</td> <td>2.15</td> <td>8.68</td> <td>0.13</td> <td>2.92</td> <td>4.91</td> <td>7.29</td> <td>1.79</td> <td>5.17</td> <td>1.90</td> <td>3.92</td> <td>2.72</td> <td>1.79</td> <td>2.30</td> <td>3.18</td> <td>4.37</td> <td>11.95</td> <td>5.30</td> <td>2.09</td> <td>4.11</td> </tr> <tr> <td>Rel. Inten. (% of BP)</td> <td>0.02</td> <td>5.69</td> <td>100.00</td> <td>4.93</td> <td>0.31</td> <td>10.21</td> <td>41.27</td> <td>0.63</td> <td>13.89</td> <td>23.34</td> <td>34.64</td> <td>8.49</td> <td>24.56</td> <td>9.01</td> <td>18.63</td> <td>12.95</td> <td>8.48</td> <td>10.92</td> <td>15.10</td> <td>20.77</td> <td>56.82</td> <td>25.19</td> <td>9.94</td> <td>19.51</td> </tr> <tr> <td>Score</td> <td>0.20</td> <td>0.50</td> <td>-0.53</td> <td>0.22</td> <td>0.33</td> <td>-0.05</td> <td>-0.22</td> <td>0.20</td> <td>-0.07</td> <td>0.50</td> <td>-0.18</td> <td>0.50</td> <td>1.50</td> <td>-0.05</td> <td>-0.10</td> <td>1.50</td> <td>-0.04</td> <td>-0.06</td> <td>1.50</td> <td>1.50</td> <td>1.50</td> <td>1.50</td> <td>-0.05</td> <td>1.50</td> </tr> <tr> <td>Ion-type</td> <td>PR</td> <td>a<sub>1</sub></td> <td></td> <td>LI</td> <td>NR</td> <td></td> <td></td> <td>RKQ</td> <td></td> <td>a<sub>2</sub></td> <td></td> <td>b<sub>2</sub></td> <td>y<sub>1</sub></td> <td></td> <td></td> <td>y<sub>2</sub></td> <td></td> <td></td> <td>y<sub>3</sub></td> <td>y<sub>6</sub><sup>+2</sup></td> <td>y<sub>4</sub></td> <td>y<sub>5</sub></td> <td>y<sub>6</sub></td> <td></td> </tr> <tr> <td>Delta ppm</td> <td>8.2</td> <td>-16.3</td> <td>0.50</td> <td>-2.6</td> <td>26.5</td> <td></td> <td></td> <td>2.0</td> <td></td> <td>-11.1</td> <td></td> <td>-12.9</td> <td>3.1</td> <td></td> <td></td> <td>8.6</td> <td></td> <td></td> <td>0.4</td> <td>8.1</td> <td>0.7</td> <td>10.6</td> <td></td> <td>7.2</td> </tr> </tbody> </table> |        |                |        |                  |                  |                                         |                                 |                            |                             |                    |         |                |                   |                                                                            | Fragment-ion (m/z) | 70.066         | 72.081                | 84.081                | 86.096         | 87.058                       | 87.097         | 120.081        | 129.102        | 141.102 | 143.117 | 157.133 | 171.112 | 175.119 | 186.102 | 199.178 | 288.205 | 329.700 <sup>+2</sup> | 386.242 <sup>+2</sup> | 402.246 | 414.760 <sup>+2</sup> | 473.283 | 715.428 | 771.482 | 828.511 | Frac. Inten. (% of TIC) | 0.00 | 1.20 | 21.04 | 1.04 | 0.06 | 2.15 | 8.68 | 0.13 | 2.92 | 4.91 | 7.29 | 1.79 | 5.17 | 1.90 | 3.92 | 2.72 | 1.79 | 2.30 | 3.18 | 4.37 | 11.95 | 5.30 | 2.09 | 4.11 | Rel. Inten. (% of BP) | 0.02 | 5.69 | 100.00 | 4.93 | 0.31 | 10.21 | 41.27 | 0.63 | 13.89 | 23.34 | 34.64 | 8.49 | 24.56 | 9.01 | 18.63 | 12.95 | 8.48 | 10.92 | 15.10 | 20.77 | 56.82 | 25.19 | 9.94 | 19.51 | Score | 0.20 | 0.50 | -0.53 | 0.22 | 0.33 | -0.05 | -0.22 | 0.20 | -0.07 | 0.50 | -0.18 | 0.50 | 1.50 | -0.05 | -0.10 | 1.50 | -0.04 | -0.06 | 1.50 | 1.50 | 1.50 | 1.50 | -0.05 | 1.50 | Ion-type | PR | a <sub>1</sub> |  | LI | NR |  |  | RKQ |  | a <sub>2</sub> |  | b <sub>2</sub> | y <sub>1</sub> |  |  | y <sub>2</sub> |  |  | y <sub>3</sub> | y <sub>6</sub> <sup>+2</sup> | y <sub>4</sub> | y <sub>5</sub> | y <sub>6</sub> |  | Delta ppm | 8.2 | -16.3 | 0.50 | -2.6 | 26.5 |  |  | 2.0 |  | -11.1 |  | -12.9 | 3.1 |  |  | 8.6 |  |  | 0.4 | 8.1 | 0.7 | 10.6 |  | 7.2 |
| Fragment-ion (m/z)                                                                                                                                                                                                                                                                                                                                                                                                                                                                                                                                                                                                                                                                                                                                                                                                                                                                                                                                                                                                                                                                                                                                                                                                                                                                                                                                                                                                                                                                                                                                                                                                                                                                                                                                                                                                                                                                                                                                                                                                                                                                                                                                                                                                                                                                                                                                                                                                                                                                                                                  | 70.066 | 72.081         | 84.081 | 86.096           | 87.058           | 87.097                                  | 120.081                         | 129.102                    | 141.102                     | 143.117            | 157.133 | 171.112        | 175.119           | 186.102                                                                    | 199.178            | 288.205        | 329.700 <sup>+2</sup> | 386.242 <sup>+2</sup> | 402.246        | 414.760 <sup>+2</sup>        | 473.283        | 715.428        | 771.482        | 828.511 |         |         |         |         |         |         |         |                       |                       |         |                       |         |         |         |         |                         |      |      |       |      |      |      |      |      |      |      |      |      |      |      |      |      |      |      |      |      |       |      |      |      |                       |      |      |        |      |      |       |       |      |       |       |       |      |       |      |       |       |      |       |       |       |       |       |      |       |       |      |      |       |      |      |       |       |      |       |      |       |      |      |       |       |      |       |       |      |      |      |      |       |      |          |    |                |  |    |    |  |  |     |  |                |  |                |                |  |  |                |  |  |                |                              |                |                |                |  |           |     |       |      |      |      |  |  |     |  |       |  |       |     |  |  |     |  |  |     |     |     |      |  |     |
| Frac. Inten. (% of TIC)                                                                                                                                                                                                                                                                                                                                                                                                                                                                                                                                                                                                                                                                                                                                                                                                                                                                                                                                                                                                                                                                                                                                                                                                                                                                                                                                                                                                                                                                                                                                                                                                                                                                                                                                                                                                                                                                                                                                                                                                                                                                                                                                                                                                                                                                                                                                                                                                                                                                                                             | 0.00   | 1.20           | 21.04  | 1.04             | 0.06             | 2.15                                    | 8.68                            | 0.13                       | 2.92                        | 4.91               | 7.29    | 1.79           | 5.17              | 1.90                                                                       | 3.92               | 2.72           | 1.79                  | 2.30                  | 3.18           | 4.37                         | 11.95          | 5.30           | 2.09           | 4.11    |         |         |         |         |         |         |         |                       |                       |         |                       |         |         |         |         |                         |      |      |       |      |      |      |      |      |      |      |      |      |      |      |      |      |      |      |      |      |       |      |      |      |                       |      |      |        |      |      |       |       |      |       |       |       |      |       |      |       |       |      |       |       |       |       |       |      |       |       |      |      |       |      |      |       |       |      |       |      |       |      |      |       |       |      |       |       |      |      |      |      |       |      |          |    |                |  |    |    |  |  |     |  |                |  |                |                |  |  |                |  |  |                |                              |                |                |                |  |           |     |       |      |      |      |  |  |     |  |       |  |       |     |  |  |     |  |  |     |     |     |      |  |     |
| Rel. Inten. (% of BP)                                                                                                                                                                                                                                                                                                                                                                                                                                                                                                                                                                                                                                                                                                                                                                                                                                                                                                                                                                                                                                                                                                                                                                                                                                                                                                                                                                                                                                                                                                                                                                                                                                                                                                                                                                                                                                                                                                                                                                                                                                                                                                                                                                                                                                                                                                                                                                                                                                                                                                               | 0.02   | 5.69           | 100.00 | 4.93             | 0.31             | 10.21                                   | 41.27                           | 0.63                       | 13.89                       | 23.34              | 34.64   | 8.49           | 24.56             | 9.01                                                                       | 18.63              | 12.95          | 8.48                  | 10.92                 | 15.10          | 20.77                        | 56.82          | 25.19          | 9.94           | 19.51   |         |         |         |         |         |         |         |                       |                       |         |                       |         |         |         |         |                         |      |      |       |      |      |      |      |      |      |      |      |      |      |      |      |      |      |      |      |      |       |      |      |      |                       |      |      |        |      |      |       |       |      |       |       |       |      |       |      |       |       |      |       |       |       |       |       |      |       |       |      |      |       |      |      |       |       |      |       |      |       |      |      |       |       |      |       |       |      |      |      |      |       |      |          |    |                |  |    |    |  |  |     |  |                |  |                |                |  |  |                |  |  |                |                              |                |                |                |  |           |     |       |      |      |      |  |  |     |  |       |  |       |     |  |  |     |  |  |     |     |     |      |  |     |
| Score                                                                                                                                                                                                                                                                                                                                                                                                                                                                                                                                                                                                                                                                                                                                                                                                                                                                                                                                                                                                                                                                                                                                                                                                                                                                                                                                                                                                                                                                                                                                                                                                                                                                                                                                                                                                                                                                                                                                                                                                                                                                                                                                                                                                                                                                                                                                                                                                                                                                                                                               | 0.20   | 0.50           | -0.53  | 0.22             | 0.33             | -0.05                                   | -0.22                           | 0.20                       | -0.07                       | 0.50               | -0.18   | 0.50           | 1.50              | -0.05                                                                      | -0.10              | 1.50           | -0.04                 | -0.06                 | 1.50           | 1.50                         | 1.50           | 1.50           | -0.05          | 1.50    |         |         |         |         |         |         |         |                       |                       |         |                       |         |         |         |         |                         |      |      |       |      |      |      |      |      |      |      |      |      |      |      |      |      |      |      |      |      |       |      |      |      |                       |      |      |        |      |      |       |       |      |       |       |       |      |       |      |       |       |      |       |       |       |       |       |      |       |       |      |      |       |      |      |       |       |      |       |      |       |      |      |       |       |      |       |       |      |      |      |      |       |      |          |    |                |  |    |    |  |  |     |  |                |  |                |                |  |  |                |  |  |                |                              |                |                |                |  |           |     |       |      |      |      |  |  |     |  |       |  |       |     |  |  |     |  |  |     |     |     |      |  |     |
| Ion-type                                                                                                                                                                                                                                                                                                                                                                                                                                                                                                                                                                                                                                                                                                                                                                                                                                                                                                                                                                                                                                                                                                                                                                                                                                                                                                                                                                                                                                                                                                                                                                                                                                                                                                                                                                                                                                                                                                                                                                                                                                                                                                                                                                                                                                                                                                                                                                                                                                                                                                                            | PR     | a <sub>1</sub> |        | LI               | NR               |                                         |                                 | RKQ                        |                             | a <sub>2</sub>     |         | b <sub>2</sub> | y <sub>1</sub>    |                                                                            |                    | y <sub>2</sub> |                       |                       | y <sub>3</sub> | y <sub>6</sub> <sup>+2</sup> | y <sub>4</sub> | y <sub>5</sub> | y <sub>6</sub> |         |         |         |         |         |         |         |         |                       |                       |         |                       |         |         |         |         |                         |      |      |       |      |      |      |      |      |      |      |      |      |      |      |      |      |      |      |      |      |       |      |      |      |                       |      |      |        |      |      |       |       |      |       |       |       |      |       |      |       |       |      |       |       |       |       |       |      |       |       |      |      |       |      |      |       |       |      |       |      |       |      |      |       |       |      |       |       |      |      |      |      |       |      |          |    |                |  |    |    |  |  |     |  |                |  |                |                |  |  |                |  |  |                |                              |                |                |                |  |           |     |       |      |      |      |  |  |     |  |       |  |       |     |  |  |     |  |  |     |     |     |      |  |     |
| Delta ppm                                                                                                                                                                                                                                                                                                                                                                                                                                                                                                                                                                                                                                                                                                                                                                                                                                                                                                                                                                                                                                                                                                                                                                                                                                                                                                                                                                                                                                                                                                                                                                                                                                                                                                                                                                                                                                                                                                                                                                                                                                                                                                                                                                                                                                                                                                                                                                                                                                                                                                                           | 8.2    | -16.3          | 0.50   | -2.6             | 26.5             |                                         |                                 | 2.0                        |                             | -11.1              |         | -12.9          | 3.1               |                                                                            |                    | 8.6            |                       |                       | 0.4            | 8.1                          | 0.7            | 10.6           |                | 7.2     |         |         |         |         |         |         |         |                       |                       |         |                       |         |         |         |         |                         |      |      |       |      |      |      |      |      |      |      |      |      |      |      |      |      |      |      |      |      |       |      |      |      |                       |      |      |        |      |      |       |       |      |       |       |       |      |       |      |       |       |      |       |       |       |       |       |      |       |       |      |      |       |      |      |       |       |      |       |      |       |      |      |       |       |      |       |       |      |      |      |      |       |      |          |    |                |  |    |    |  |  |     |  |                |  |                |                |  |  |                |  |  |                |                              |                |                |                |  |           |     |       |      |      |      |  |  |     |  |       |  |       |     |  |  |     |  |  |     |     |     |      |  |     |

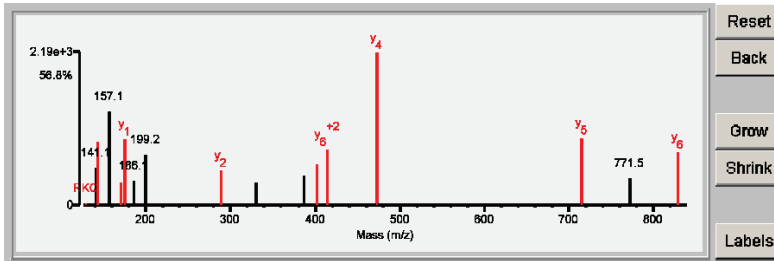

Result Summary

| Rank | Score | SPI (%) | BCS | # Unmatched ions | Variable sites | Sequence                          | MH <sup>+</sup> Calculated (Da) | MH <sup>+</sup> Error (Da) | MH <sup>+</sup> Error (ppm) | Protein MW/PI (Da) | Species | Accession # | Protein Name                                                               |
|------|-------|---------|-----|------------------|----------------|-----------------------------------|---------------------------------|----------------------------|-----------------------------|--------------------|---------|-------------|----------------------------------------------------------------------------|
| 1    | 14.08 | 80.3    | 8   | 5/25             | K668k          | (K)SPVAKD <del>V</del> DLEFLAK(M) | 1531.8366                       | 114.0563                   | 8.1                         | 89322.3/5.14       | HUMAN   | P55072      | Transitional endoplasmic reticulum ATPase OS=Homo sapiens GN=VCP PE=1 SV=4 |

Detailed Results

| Rank | Score | SPI (%) | BCS | # Unmatched ions | Variable sites | Sequence                                   | MH <sup>+</sup> Calculated (Da) | MH <sup>+</sup> Error (Da) | MH <sup>+</sup> Error (ppm) | Protein MW/PI (Da) | Species | Accession # | MS-Digest Index # | Protein Name                                                               |
|------|-------|---------|-----|------------------|----------------|--------------------------------------------|---------------------------------|----------------------------|-----------------------------|--------------------|---------|-------------|-------------------|----------------------------------------------------------------------------|
| 1    | 14.08 | 80.3    | 8   | 5/25             | K668k          | (K)S P\ V A\ k D V\ D\ L\ E\ F L\ A\ K (M) | 1531.8366                       | 114.0563                   | 8.1                         | 89322.3/5.14       | HUMAN   | P55072      | 386876            | Transitional endoplasmic reticulum ATPase OS=Homo sapiens GN=VCP PE=1 SV=4 |

  

| Fragment-ion (m/z)      | 60.044 | 70.065 | 72.081 | 84.081 | 86.095 | 120.081 | 129.100 | 130.087 | 147.112 | 157.096 | 169.133 | 185.092 | 201.122 | 218.148 | 355.203 | 371.203 | 383.225 | 478.296 | 500.284 | 510.286 | 607.345 | 681.895 <sup>+2</sup> | 684.377 | 720.429 | 835.459 |
|-------------------------|--------|--------|--------|--------|--------|---------|---------|---------|---------|---------|---------|---------|---------|---------|---------|---------|---------|---------|---------|---------|---------|-----------------------|---------|---------|---------|
| Frac. Inten. (% of TIC) | 3.55   | 0.02   | 0.63   | 0.63   | 0.58   | 0.25    | 0.23    | 4.65    | 5.63    | 10.98   | 4.81    | 3.47    | 6.53    | 5.81    | 3.68    | 3.96    | 3.49    | 5.61    | 3.97    | 6.07    | 7.30    | 3.42                  | 3.49    | 5.15    | 6.09    |
| Rel. Inten. (% of BP)   | 32.30  | 0.16   | 5.75   | 5.74   | 5.28   | 2.30    | 2.08    | 42.32   | 51.26   | 100.00  | 43.82   | 31.56   | 59.45   | 52.93   | 33.52   | 36.05   | 31.73   | 51.05   | 36.16   | 55.27   | 66.43   | 31.14                 | 31.81   | 46.89   | 55.43   |
| Score                   | 0.50   | 0.20   | 0.50   | 0.50   | 0.22   | 1.00    | 0.20    | 0.50    | 1.50    | 0.50    | -0.44   | 0.50    | 0.50    | 1.50    | 0.50    | -0.36   | -0.32   | 1.50    | -0.36   | 0.75    | 1.50    | -0.31                 | 0.50    | 1.50    | 1.50    |
| Ion-type                | a1     | PR     | V      | KQ     | LI     | F       | RKQ     | y1-NH3  | y1      | a2      |         | b2      | y2-NH3  | y2      | b4      |         |         | y4      |         | PVAK    | y5      |                       | a6      | y6      | y7      |
| Delta ppm               | -24.8  | -7.5   | -2.4   | -2.1   | -11.9  | 3.5     | -18.9   | 8.8     | -2.7    | -15.0   |         | -5.8    | -6.8    | -10.6   | 11.0    |         |         | -13.6   |         | -36.2   | 0.7     |                       | 12.5    | 0.3     | 3.5     |

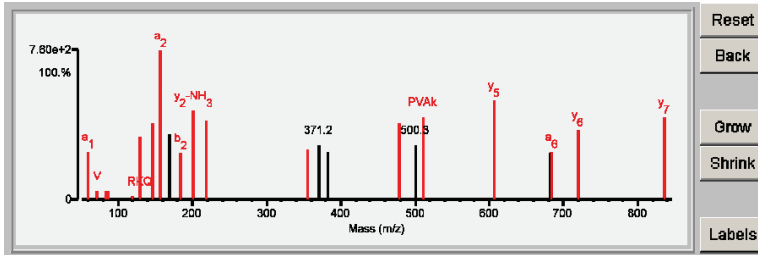

Result Summary

| Rank | Score | SPI (%) | BCS | # Unmatched Ions | Variable sites | Sequence                 | MH <sup>+</sup> Calculated (Da) | MH <sup>+</sup> Error (Da) | MH <sup>+</sup> Error (ppm) | Protein MW/pI (Da) | Species | Accession # | Protein Name                                                                  |
|------|-------|---------|-----|------------------|----------------|--------------------------|---------------------------------|----------------------------|-----------------------------|--------------------|---------|-------------|-------------------------------------------------------------------------------|
| 1    | 19.18 | 83.3    | 10  | 6/25             | K73k           | (R)VQNMLYADVGGKQFPVTR(G) | 2094.0801                       | 114.0603                   | 7.9                         | 18998.7/5.76       | HUMAN   | P51571      | Translocon-associated protein subunit delta OS=Homo sapiens GN=SSR4 PE=1 SV=1 |

Detailed Results

| Rank                    | Score | SPI (%) | BCS | # Unmatched Ions | Variable sites | Sequence                                        | MH <sup>+</sup> Calculated (Da) | MH <sup>+</sup> Error (Da) | MH <sup>+</sup> Error (ppm) | Protein MW/pI (Da) | Species                         | Accession #    | MS-Digest Index # | Protein Name                                                                  |                |         |                |                |                   |                                                 |                       |                |                               |                       |                               |                               |                               |                       |                |                 |          |
|-------------------------|-------|---------|-----|------------------|----------------|-------------------------------------------------|---------------------------------|----------------------------|-----------------------------|--------------------|---------------------------------|----------------|-------------------|-------------------------------------------------------------------------------|----------------|---------|----------------|----------------|-------------------|-------------------------------------------------|-----------------------|----------------|-------------------------------|-----------------------|-------------------------------|-------------------------------|-------------------------------|-----------------------|----------------|-----------------|----------|
| 1                       | 19.18 | 83.3    | 10  | 6/25             | K73k           | (R) V Q N M L A L Y A D V G G K Q F P V T R (G) | 2094.0801                       | 114.0603                   | 7.9                         | 18998.7/5.76       | HUMAN                           | P51571         | 366921            | Translocon-associated protein subunit delta OS=Homo sapiens GN=SSR4 PE=1 SV=1 |                |         |                |                |                   |                                                 |                       |                |                               |                       |                               |                               |                               |                       |                |                 |          |
|                         |       |         |     |                  |                |                                                 | 72.080                          | 101.071                    | 117.102                     | 136.076            | 211.112                         | 228.134        | 246.100           | 317.123                                                                       | 342.179        | 365.203 | 428.159        | 472.292        | 619.351           | 694.873                                         | 697.687 <sup>+3</sup> | 709.396        | 747.428                       | 776.395 <sup>+2</sup> | 833.427 <sup>+2</sup>         | 868.472 <sup>+2</sup>         | 934.007 <sup>+2</sup>         | 991.007 <sup>+2</sup> | 1046.527       | 1103.596        | 1202.681 |
| Frac. Inten. (% of TIC) |       |         |     |                  |                |                                                 | 0.55                            | 0.06                       | 4.15                        | 0.08               | 2.00                            | 7.73           | 2.64              | 4.03                                                                          | 2.60           | 2.00    | 3.06           | 6.03           | 2.06              | 1.94                                            | 4.72                  | 3.26           | 2.92                          | 7.79                  | 3.02                          | 5.32                          | 3.46                          | 15.77                 | 4.22           | 8.72            | 1.87     |
| Rel. Inten. (% of BP)   |       |         |     |                  |                |                                                 | 3.49                            | 0.37                       | 26.31                       | 0.51               | 12.69                           | 48.99          | 16.75             | 25.53                                                                         | 16.51          | 12.70   | 19.38          | 38.24          | 13.03             | 12.32                                           | 29.92                 | 20.65          | 18.54                         | 49.36                 | 19.14                         | 33.72                         | 21.92                         | 100.00                | 26.78          | 55.32           | 11.87    |
| Score                   |       |         |     |                  |                |                                                 | 0.50                            | 0.50                       | -0.23                       | 1.00               | 0.25                            | 0.50           | 0.75              | 0.75                                                                          | 0.50           | -0.11   | -0.17          | 1.50           | 1.50              | 1.50                                            | 0.50                  | -0.18          | 1.50                          | 1.50                  | 1.50                          | -0.16                         | 1.50                          | 1.50                  | -0.23          | 1.50            | 1.50     |
| Ion-type                |       |         |     |                  |                |                                                 | b <sub>1</sub>                  | QK                         |                             | Y                  | b <sub>2</sub> -NH <sub>3</sub> | b <sub>2</sub> | NM                | NMA                                                                           | b <sub>3</sub> |         | y <sub>4</sub> | y <sub>5</sub> | y <sup>++12</sup> | y <sub>18</sub> -H <sub>2</sub> O <sup>+3</sup> |                       | y <sub>6</sub> | y <sub>13</sub> <sup>+2</sup> |                       | y <sub>15</sub> <sup>+2</sup> | y <sub>16</sub> <sup>+2</sup> | y <sub>17</sub> <sup>+2</sup> |                       | y <sub>9</sub> | y <sub>10</sub> |          |
| Delta ppm               |       |         |     |                  |                |                                                 | -28.8                           | 0.50                       | -0.4                        | 0.1                | 14.1                            | -6.0           | 34.6              | -16.3                                                                         | 2.1            | 9.7     | -8.1           | 7.9            | 1.0               |                                                 | 17.4                  |                | -5.2                          |                       | 14.0                          | 28.5                          | 5.6                           |                       | 0.3            | 13.9            |          |
| V                       |       |         |     |                  |                |                                                 | -13.5                           |                            |                             |                    |                                 |                |                   |                                                                               |                |         |                |                |                   |                                                 |                       |                |                               |                       |                               |                               |                               |                       |                |                 |          |

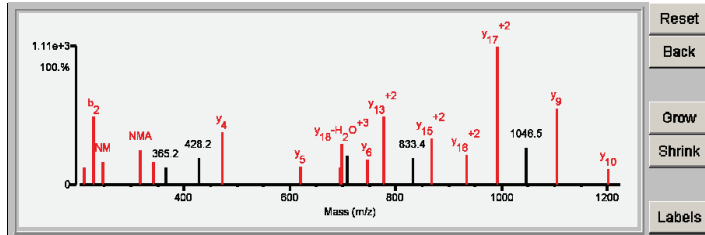

Result Summary

| Rank | Score | SPI (%) | BCS | # Unmatched ions | Variable sites | Sequence                  | MH <sup>+</sup> Calculated (Da) | MH <sup>+</sup> Error (Da) | MH <sup>+</sup> Error (ppm) | Protein MW/pI (Da) | Species | Accession # | Protein Name                                                                                 |
|------|-------|---------|-----|------------------|----------------|---------------------------|---------------------------------|----------------------------|-----------------------------|--------------------|---------|-------------|----------------------------------------------------------------------------------------------|
| 1    | 17.24 | 81.5    | 5   | 4/25             | K116k          | (R)VVAkLPFTPLSYIQGLSHR(N) | 2126.2121                       | 114.0665                   | 10.5                        | 21175.19.77        | HUMAN   | Q9UM00      | Transmembrane and coiled-coil domain-containing protein 1 OS=Homo sapiens GN=TMCO1 PE=1 SV=1 |

Detailed Results

| Rank | Score | SPI (%) | BCS | # Unmatched ions | Variable sites | Sequence                  | MH <sup>+</sup> Calculated (Da) | MH <sup>+</sup> Error (Da) | MH <sup>+</sup> Error (ppm) | Protein MW/pI (Da) | Species | Accession # | MS-Digest Index # | Protein Name                                                                                 |
|------|-------|---------|-----|------------------|----------------|---------------------------|---------------------------------|----------------------------|-----------------------------|--------------------|---------|-------------|-------------------|----------------------------------------------------------------------------------------------|
| 1    | 17.24 | 81.5    | 5   | 4/25             | K116k          | (R)VVAkLPFTPLSYIQGLSHR(N) | 2126.2121                       | 114.0665                   | 10.5                        | 21175.19.77        | HUMAN   | Q9UM00      | 786101            | Transmembrane and coiled-coil domain-containing protein 1 OS=Homo sapiens GN=TMCO1 PE=1 SV=1 |

  

| Fragment-ion (m/z)     | 70.065 | 72.079         | 84.078 | 86.094 | 120.082 | 129.098 | 136.076 | 171.147        | 175.117        | 183.148 | 199.102 | 245.125 | 298.182 | 346.173 | 356.227        | 399.206        | 412.284 | 461.239          | 526.315          | 569.305 <sup>+2</sup> | 635.861 <sup>+2</sup>         | 677.264        | 697.379        | 1060.564        | 1270.674 |
|------------------------|--------|----------------|--------|--------|---------|---------|---------|----------------|----------------|---------|---------|---------|---------|---------|----------------|----------------|---------|------------------|------------------|-----------------------|-------------------------------|----------------|----------------|-----------------|----------|
| Frac. Inten.(% of TIC) | 0.01   | 0.58           | 0.22   | 0.39   | 0.12    | 0.10    | 0.13    | 17.69          | 6.95           | 5.08    | 3.73    | 4.73    | 3.18    | 3.29    | 4.67           | 4.92           | 6.30    | 4.33             | 3.54             | 7.12                  | 7.31                          | 3.50           | 4.70           | 3.85            | 3.56     |
| Rel. Inten.(% of BP)   | 0.07   | 3.29           | 1.22   | 2.20   | 0.66    | 0.59    | 0.76    | 100.00         | 39.27          | 28.70   | 21.09   | 26.74   | 18.00   | 18.59   | 26.40          | 27.80          | 35.59   | 24.47            | 19.99            | 40.25                 | 41.31                         | 19.80          | 26.59          | 21.78           | 20.11    |
| Score                  | 0.20   | 0.50           | 0.50   | 0.22   | 1.00    | 0.20    | 1.00    | 0.50           | 1.50           | -0.26   | 0.75    | 0.75    | 0.75    | 0.75    | 0.75           | 1.50           | -0.32   | 0.75             | 0.75             | -0.37                 | 1.50                          | -0.18          | 1.50           | 1.50            | 1.50     |
| Ion-type               | PR     | a <sub>1</sub> | KQ     | LI     | F       | RKQ     | Y       | a <sub>2</sub> | y <sub>1</sub> | TP      | PF      | PLS     | FTP     | KL      | y <sub>3</sub> | y <sub>3</sub> | PLSY    | VaK <sub>L</sub> | VaK <sub>L</sub> |                       | y <sub>11</sub> <sup>+2</sup> | y <sub>6</sub> | y <sub>9</sub> | y <sub>11</sub> |          |
| Delta ppm              | -1.8   | -45.4          | -36.6  | -23.5  | 13.5    | -32.1   | 3.7     | -20.4          | -14.0          | -32.2   | -20.2   | 14.7    | -10.8   | -9.3    | -10.3          |                |         | -4.0             | -39.2            |                       | 18.8                          | 7.5            | 10.0           | -12.7           |          |

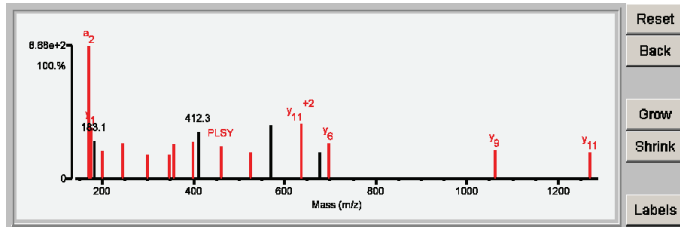

Reset  
Back  
Grow  
Shrink  
Labels

Result Summary

| Rank | Score | SPI (%) | BCS | # Unmatched ions | Variable sites | Sequence                 | MH <sup>+</sup> Calculated (Da) | MH <sup>+</sup> Error (Da) | MH <sup>+</sup> Error (ppm) | Protein MW/pl (Da) | Species | Accession # | Protein Name                                                                                    |
|------|-------|---------|-----|------------------|----------------|--------------------------|---------------------------------|----------------------------|-----------------------------|--------------------|---------|-------------|-------------------------------------------------------------------------------------------------|
| 1    | 14.18 | 78.1    | 6   | 7/25             | K68k           | (R)LIQVPkGPVGEYEEFLR(T)  | 2346.1976                       | 114.0591                   | 6.6                         | 14199.5/5.21       | HUMAN   | Q9UI30      | TRM112-like protein OS=Homo sapiens GN=AD-001 PE=1 SV=1                                         |
| 2    | 5.87  | 61.5    | 2   | 14/25            | None           | (K)QIVFDSPYDSSPNRPIIR(W) | 2460.2518                       | 0.0050                     | 2.0                         | 117749.2/8.91      | HUMAN   | RQ14703     | REVERSE Membrane-bound transcription factor site-1 protease OS=Homo sapiens GN=MBTPS1 PE=1 SV=1 |

Detailed Results

| Rank                                                                                                                                                                                                                                                                                                                                                                                                                                                                                                                                                                                                                                                                                                                                                                                                                                                                                                                                                                                                                                                                                                                                                                                                                                                                                                                                                                                                                                                                                                                                                                                                                                                                                                                                                                                                                                                                                                                                                                                                                                                                                                                                                                                                                                                                                                                                                                                                                                                                                                                                                                                                                                                                      | Score  | SPI (%) | BCS    | # Unmatched ions | Variable sites | Sequence                | MH <sup>+</sup> Calculated (Da) | MH <sup>+</sup> Error (Da) | MH <sup>+</sup> Error (ppm) | Protein MW/pl (Da) | Species        | Accession # | MS-Digest Index # | Protein Name                                            |                    |         |         |                               |                               |                               |                        |                  |                 |                 |          |         |         |         |         |         |         |         |         |                       |                        |                        |          |          |          |          |                        |      |      |      |      |      |      |      |      |      |      |      |      |      |      |      |      |      |      |      |       |       |      |      |      |      |                      |      |      |      |      |      |       |      |       |       |       |       |       |      |      |       |      |      |      |      |        |       |       |      |      |      |       |      |      |      |      |      |       |      |       |       |      |      |       |       |      |      |       |       |      |      |      |       |      |      |      |          |    |    |    |    |   |                |                |  |    |                |                |       |                |  |                 |  |  |                               |                               |                               |  |                  |                 |                 |           |       |  |       |     |      |       |  |      |  |       |     |     |  |       |  |      |  |  |     |      |     |  |     |     |       |
|---------------------------------------------------------------------------------------------------------------------------------------------------------------------------------------------------------------------------------------------------------------------------------------------------------------------------------------------------------------------------------------------------------------------------------------------------------------------------------------------------------------------------------------------------------------------------------------------------------------------------------------------------------------------------------------------------------------------------------------------------------------------------------------------------------------------------------------------------------------------------------------------------------------------------------------------------------------------------------------------------------------------------------------------------------------------------------------------------------------------------------------------------------------------------------------------------------------------------------------------------------------------------------------------------------------------------------------------------------------------------------------------------------------------------------------------------------------------------------------------------------------------------------------------------------------------------------------------------------------------------------------------------------------------------------------------------------------------------------------------------------------------------------------------------------------------------------------------------------------------------------------------------------------------------------------------------------------------------------------------------------------------------------------------------------------------------------------------------------------------------------------------------------------------------------------------------------------------------------------------------------------------------------------------------------------------------------------------------------------------------------------------------------------------------------------------------------------------------------------------------------------------------------------------------------------------------------------------------------------------------------------------------------------------------|--------|---------|--------|------------------|----------------|-------------------------|---------------------------------|----------------------------|-----------------------------|--------------------|----------------|-------------|-------------------|---------------------------------------------------------|--------------------|---------|---------|-------------------------------|-------------------------------|-------------------------------|------------------------|------------------|-----------------|-----------------|----------|---------|---------|---------|---------|---------|---------|---------|---------|-----------------------|------------------------|------------------------|----------|----------|----------|----------|------------------------|------|------|------|------|------|------|------|------|------|------|------|------|------|------|------|------|------|------|------|-------|-------|------|------|------|------|----------------------|------|------|------|------|------|-------|------|-------|-------|-------|-------|-------|------|------|-------|------|------|------|------|--------|-------|-------|------|------|------|-------|------|------|------|------|------|-------|------|-------|-------|------|------|-------|-------|------|------|-------|-------|------|------|------|-------|------|------|------|----------|----|----|----|----|---|----------------|----------------|--|----|----------------|----------------|-------|----------------|--|-----------------|--|--|-------------------------------|-------------------------------|-------------------------------|--|------------------|-----------------|-----------------|-----------|-------|--|-------|-----|------|-------|--|------|--|-------|-----|-----|--|-------|--|------|--|--|-----|------|-----|--|-----|-----|-------|
| 1                                                                                                                                                                                                                                                                                                                                                                                                                                                                                                                                                                                                                                                                                                                                                                                                                                                                                                                                                                                                                                                                                                                                                                                                                                                                                                                                                                                                                                                                                                                                                                                                                                                                                                                                                                                                                                                                                                                                                                                                                                                                                                                                                                                                                                                                                                                                                                                                                                                                                                                                                                                                                                                                         | 14.18  | 78.1    | 6      | 7/25             | K68k           | (R)LIQVPkGPVGEYEEFLR(T) | 2346.1976                       | 114.0591                   | 6.6                         | 14199.5/5.21       | HUMAN          | Q9UI30      | 791999            | TRM112-like protein OS=Homo sapiens GN=AD-001 PE=1 SV=1 |                    |         |         |                               |                               |                               |                        |                  |                 |                 |          |         |         |         |         |         |         |         |         |                       |                        |                        |          |          |          |          |                        |      |      |      |      |      |      |      |      |      |      |      |      |      |      |      |      |      |      |      |       |       |      |      |      |      |                      |      |      |      |      |      |       |      |       |       |       |       |       |      |      |       |      |      |      |      |        |       |       |      |      |      |       |      |      |      |      |      |       |      |       |       |      |      |       |       |      |      |       |       |      |      |      |       |      |      |      |          |    |    |    |    |   |                |                |  |    |                |                |       |                |  |                 |  |  |                               |                               |                               |  |                  |                 |                 |           |       |  |       |     |      |       |  |      |  |       |     |     |  |       |  |      |  |  |     |      |     |  |     |     |       |
| <table border="1"> <thead> <tr> <th>Fragment-Ion (m/z)</th> <th>70.064</th> <th>84.082</th> <th>86.093</th> <th>101.071</th> <th>102.054</th> <th>199.178</th> <th>200.134</th> <th>227.176</th> <th>228.147</th> <th>340.194</th> <th>355.235</th> <th>454.304</th> <th>471.278</th> <th>593.329</th> <th>617.191</th> <th>693.379</th> <th>749.908</th> <th>938.486</th> <th>998.496<sup>+2</sup></th> <th>1003.971<sup>+2</sup></th> <th>1053.515<sup>+2</sup></th> <th>1109.550</th> <th>1117.548</th> <th>1285.579</th> <th>1667.722</th> </tr> </thead> <tbody> <tr> <td>Frac. Inten.(% of TIC)</td> <td>0.00</td> <td>0.07</td> <td>0.16</td> <td>0.08</td> <td>0.07</td> <td>9.54</td> <td>1.75</td> <td>3.38</td> <td>4.66</td> <td>4.39</td> <td>5.35</td> <td>3.24</td> <td>2.50</td> <td>2.33</td> <td>3.00</td> <td>1.90</td> <td>1.77</td> <td>2.44</td> <td>1.99</td> <td>29.63</td> <td>10.03</td> <td>5.80</td> <td>1.85</td> <td>2.29</td> <td>1.80</td> </tr> <tr> <td>Rel. Inten.(% of BP)</td> <td>0.01</td> <td>0.22</td> <td>0.53</td> <td>0.27</td> <td>0.24</td> <td>32.18</td> <td>5.92</td> <td>11.40</td> <td>15.72</td> <td>14.80</td> <td>18.07</td> <td>10.92</td> <td>8.42</td> <td>7.87</td> <td>10.12</td> <td>6.41</td> <td>5.98</td> <td>8.24</td> <td>6.73</td> <td>100.00</td> <td>33.85</td> <td>19.57</td> <td>6.24</td> <td>7.72</td> <td>6.08</td> </tr> <tr> <td>Score</td> <td>0.20</td> <td>0.22</td> <td>0.50</td> <td>1.00</td> <td>0.50</td> <td>-0.06</td> <td>0.50</td> <td>-0.16</td> <td>-0.75</td> <td>0.50</td> <td>0.50</td> <td>-0.08</td> <td>-0.08</td> <td>0.75</td> <td>1.50</td> <td>-0.06</td> <td>-0.06</td> <td>0.50</td> <td>1.50</td> <td>1.50</td> <td>-0.20</td> <td>1.50</td> <td>1.50</td> <td>1.50</td> </tr> <tr> <td>Ion-type</td> <td>PR</td> <td>QK</td> <td>LI</td> <td>QK</td> <td>E</td> <td>a<sub>2</sub></td> <td>b<sub>2</sub></td> <td></td> <td>Pk</td> <td>b<sub>3</sub></td> <td>b<sub>4</sub></td> <td>PkGPV</td> <td>Y<sub>5</sub></td> <td></td> <td>Y<sub>10</sub></td> <td></td> <td></td> <td>a<sub>17</sub><sup>+2</sup></td> <td>y<sub>16</sub><sup>+2</sup></td> <td>y<sub>17</sub><sup>+2</sup></td> <td></td> <td>Y<sup>+18</sup></td> <td>Y<sub>10</sub></td> <td>Y<sub>14</sub></td> </tr> <tr> <td>Delta ppm</td> <td>-16.1</td> <td></td> <td>-35.1</td> <td>2.6</td> <td>-7.4</td> <td>-16.0</td> <td></td> <td>-2.6</td> <td></td> <td>-15.4</td> <td>0.1</td> <td>0.2</td> <td></td> <td>-20.7</td> <td></td> <td>32.6</td> <td></td> <td></td> <td>1.5</td> <td>-5.1</td> <td>4.0</td> <td></td> <td>7.3</td> <td>7.1</td> <td>-19.5</td> </tr> </tbody> </table> |        |         |        |                  |                |                         |                                 |                            |                             |                    |                |             |                   |                                                         | Fragment-Ion (m/z) | 70.064  | 84.082  | 86.093                        | 101.071                       | 102.054                       | 199.178                | 200.134          | 227.176         | 228.147         | 340.194  | 355.235 | 454.304 | 471.278 | 593.329 | 617.191 | 693.379 | 749.908 | 938.486 | 998.496 <sup>+2</sup> | 1003.971 <sup>+2</sup> | 1053.515 <sup>+2</sup> | 1109.550 | 1117.548 | 1285.579 | 1667.722 | Frac. Inten.(% of TIC) | 0.00 | 0.07 | 0.16 | 0.08 | 0.07 | 9.54 | 1.75 | 3.38 | 4.66 | 4.39 | 5.35 | 3.24 | 2.50 | 2.33 | 3.00 | 1.90 | 1.77 | 2.44 | 1.99 | 29.63 | 10.03 | 5.80 | 1.85 | 2.29 | 1.80 | Rel. Inten.(% of BP) | 0.01 | 0.22 | 0.53 | 0.27 | 0.24 | 32.18 | 5.92 | 11.40 | 15.72 | 14.80 | 18.07 | 10.92 | 8.42 | 7.87 | 10.12 | 6.41 | 5.98 | 8.24 | 6.73 | 100.00 | 33.85 | 19.57 | 6.24 | 7.72 | 6.08 | Score | 0.20 | 0.22 | 0.50 | 1.00 | 0.50 | -0.06 | 0.50 | -0.16 | -0.75 | 0.50 | 0.50 | -0.08 | -0.08 | 0.75 | 1.50 | -0.06 | -0.06 | 0.50 | 1.50 | 1.50 | -0.20 | 1.50 | 1.50 | 1.50 | Ion-type | PR | QK | LI | QK | E | a <sub>2</sub> | b <sub>2</sub> |  | Pk | b <sub>3</sub> | b <sub>4</sub> | PkGPV | Y <sub>5</sub> |  | Y <sub>10</sub> |  |  | a <sub>17</sub> <sup>+2</sup> | y <sub>16</sub> <sup>+2</sup> | y <sub>17</sub> <sup>+2</sup> |  | Y <sup>+18</sup> | Y <sub>10</sub> | Y <sub>14</sub> | Delta ppm | -16.1 |  | -35.1 | 2.6 | -7.4 | -16.0 |  | -2.6 |  | -15.4 | 0.1 | 0.2 |  | -20.7 |  | 32.6 |  |  | 1.5 | -5.1 | 4.0 |  | 7.3 | 7.1 | -19.5 |
| Fragment-Ion (m/z)                                                                                                                                                                                                                                                                                                                                                                                                                                                                                                                                                                                                                                                                                                                                                                                                                                                                                                                                                                                                                                                                                                                                                                                                                                                                                                                                                                                                                                                                                                                                                                                                                                                                                                                                                                                                                                                                                                                                                                                                                                                                                                                                                                                                                                                                                                                                                                                                                                                                                                                                                                                                                                                        | 70.064 | 84.082  | 86.093 | 101.071          | 102.054        | 199.178                 | 200.134                         | 227.176                    | 228.147                     | 340.194            | 355.235        | 454.304     | 471.278           | 593.329                                                 | 617.191            | 693.379 | 749.908 | 938.486                       | 998.496 <sup>+2</sup>         | 1003.971 <sup>+2</sup>        | 1053.515 <sup>+2</sup> | 1109.550         | 1117.548        | 1285.579        | 1667.722 |         |         |         |         |         |         |         |         |                       |                        |                        |          |          |          |          |                        |      |      |      |      |      |      |      |      |      |      |      |      |      |      |      |      |      |      |      |       |       |      |      |      |      |                      |      |      |      |      |      |       |      |       |       |       |       |       |      |      |       |      |      |      |      |        |       |       |      |      |      |       |      |      |      |      |      |       |      |       |       |      |      |       |       |      |      |       |       |      |      |      |       |      |      |      |          |    |    |    |    |   |                |                |  |    |                |                |       |                |  |                 |  |  |                               |                               |                               |  |                  |                 |                 |           |       |  |       |     |      |       |  |      |  |       |     |     |  |       |  |      |  |  |     |      |     |  |     |     |       |
| Frac. Inten.(% of TIC)                                                                                                                                                                                                                                                                                                                                                                                                                                                                                                                                                                                                                                                                                                                                                                                                                                                                                                                                                                                                                                                                                                                                                                                                                                                                                                                                                                                                                                                                                                                                                                                                                                                                                                                                                                                                                                                                                                                                                                                                                                                                                                                                                                                                                                                                                                                                                                                                                                                                                                                                                                                                                                                    | 0.00   | 0.07    | 0.16   | 0.08             | 0.07           | 9.54                    | 1.75                            | 3.38                       | 4.66                        | 4.39               | 5.35           | 3.24        | 2.50              | 2.33                                                    | 3.00               | 1.90    | 1.77    | 2.44                          | 1.99                          | 29.63                         | 10.03                  | 5.80             | 1.85            | 2.29            | 1.80     |         |         |         |         |         |         |         |         |                       |                        |                        |          |          |          |          |                        |      |      |      |      |      |      |      |      |      |      |      |      |      |      |      |      |      |      |      |       |       |      |      |      |      |                      |      |      |      |      |      |       |      |       |       |       |       |       |      |      |       |      |      |      |      |        |       |       |      |      |      |       |      |      |      |      |      |       |      |       |       |      |      |       |       |      |      |       |       |      |      |      |       |      |      |      |          |    |    |    |    |   |                |                |  |    |                |                |       |                |  |                 |  |  |                               |                               |                               |  |                  |                 |                 |           |       |  |       |     |      |       |  |      |  |       |     |     |  |       |  |      |  |  |     |      |     |  |     |     |       |
| Rel. Inten.(% of BP)                                                                                                                                                                                                                                                                                                                                                                                                                                                                                                                                                                                                                                                                                                                                                                                                                                                                                                                                                                                                                                                                                                                                                                                                                                                                                                                                                                                                                                                                                                                                                                                                                                                                                                                                                                                                                                                                                                                                                                                                                                                                                                                                                                                                                                                                                                                                                                                                                                                                                                                                                                                                                                                      | 0.01   | 0.22    | 0.53   | 0.27             | 0.24           | 32.18                   | 5.92                            | 11.40                      | 15.72                       | 14.80              | 18.07          | 10.92       | 8.42              | 7.87                                                    | 10.12              | 6.41    | 5.98    | 8.24                          | 6.73                          | 100.00                        | 33.85                  | 19.57            | 6.24            | 7.72            | 6.08     |         |         |         |         |         |         |         |         |                       |                        |                        |          |          |          |          |                        |      |      |      |      |      |      |      |      |      |      |      |      |      |      |      |      |      |      |      |       |       |      |      |      |      |                      |      |      |      |      |      |       |      |       |       |       |       |       |      |      |       |      |      |      |      |        |       |       |      |      |      |       |      |      |      |      |      |       |      |       |       |      |      |       |       |      |      |       |       |      |      |      |       |      |      |      |          |    |    |    |    |   |                |                |  |    |                |                |       |                |  |                 |  |  |                               |                               |                               |  |                  |                 |                 |           |       |  |       |     |      |       |  |      |  |       |     |     |  |       |  |      |  |  |     |      |     |  |     |     |       |
| Score                                                                                                                                                                                                                                                                                                                                                                                                                                                                                                                                                                                                                                                                                                                                                                                                                                                                                                                                                                                                                                                                                                                                                                                                                                                                                                                                                                                                                                                                                                                                                                                                                                                                                                                                                                                                                                                                                                                                                                                                                                                                                                                                                                                                                                                                                                                                                                                                                                                                                                                                                                                                                                                                     | 0.20   | 0.22    | 0.50   | 1.00             | 0.50           | -0.06                   | 0.50                            | -0.16                      | -0.75                       | 0.50               | 0.50           | -0.08       | -0.08             | 0.75                                                    | 1.50               | -0.06   | -0.06   | 0.50                          | 1.50                          | 1.50                          | -0.20                  | 1.50             | 1.50            | 1.50            |          |         |         |         |         |         |         |         |         |                       |                        |                        |          |          |          |          |                        |      |      |      |      |      |      |      |      |      |      |      |      |      |      |      |      |      |      |      |       |       |      |      |      |      |                      |      |      |      |      |      |       |      |       |       |       |       |       |      |      |       |      |      |      |      |        |       |       |      |      |      |       |      |      |      |      |      |       |      |       |       |      |      |       |       |      |      |       |       |      |      |      |       |      |      |      |          |    |    |    |    |   |                |                |  |    |                |                |       |                |  |                 |  |  |                               |                               |                               |  |                  |                 |                 |           |       |  |       |     |      |       |  |      |  |       |     |     |  |       |  |      |  |  |     |      |     |  |     |     |       |
| Ion-type                                                                                                                                                                                                                                                                                                                                                                                                                                                                                                                                                                                                                                                                                                                                                                                                                                                                                                                                                                                                                                                                                                                                                                                                                                                                                                                                                                                                                                                                                                                                                                                                                                                                                                                                                                                                                                                                                                                                                                                                                                                                                                                                                                                                                                                                                                                                                                                                                                                                                                                                                                                                                                                                  | PR     | QK      | LI     | QK               | E              | a <sub>2</sub>          | b <sub>2</sub>                  |                            | Pk                          | b <sub>3</sub>     | b <sub>4</sub> | PkGPV       | Y <sub>5</sub>    |                                                         | Y <sub>10</sub>    |         |         | a <sub>17</sub> <sup>+2</sup> | y <sub>16</sub> <sup>+2</sup> | y <sub>17</sub> <sup>+2</sup> |                        | Y <sup>+18</sup> | Y <sub>10</sub> | Y <sub>14</sub> |          |         |         |         |         |         |         |         |         |                       |                        |                        |          |          |          |          |                        |      |      |      |      |      |      |      |      |      |      |      |      |      |      |      |      |      |      |      |       |       |      |      |      |      |                      |      |      |      |      |      |       |      |       |       |       |       |       |      |      |       |      |      |      |      |        |       |       |      |      |      |       |      |      |      |      |      |       |      |       |       |      |      |       |       |      |      |       |       |      |      |      |       |      |      |      |          |    |    |    |    |   |                |                |  |    |                |                |       |                |  |                 |  |  |                               |                               |                               |  |                  |                 |                 |           |       |  |       |     |      |       |  |      |  |       |     |     |  |       |  |      |  |  |     |      |     |  |     |     |       |
| Delta ppm                                                                                                                                                                                                                                                                                                                                                                                                                                                                                                                                                                                                                                                                                                                                                                                                                                                                                                                                                                                                                                                                                                                                                                                                                                                                                                                                                                                                                                                                                                                                                                                                                                                                                                                                                                                                                                                                                                                                                                                                                                                                                                                                                                                                                                                                                                                                                                                                                                                                                                                                                                                                                                                                 | -16.1  |         | -35.1  | 2.6              | -7.4           | -16.0                   |                                 | -2.6                       |                             | -15.4              | 0.1            | 0.2         |                   | -20.7                                                   |                    | 32.6    |         |                               | 1.5                           | -5.1                          | 4.0                    |                  | 7.3             | 7.1             | -19.5    |         |         |         |         |         |         |         |         |                       |                        |                        |          |          |          |          |                        |      |      |      |      |      |      |      |      |      |      |      |      |      |      |      |      |      |      |      |       |       |      |      |      |      |                      |      |      |      |      |      |       |      |       |       |       |       |       |      |      |       |      |      |      |      |        |       |       |      |      |      |       |      |      |      |      |      |       |      |       |       |      |      |       |       |      |      |       |       |      |      |      |       |      |      |      |          |    |    |    |    |   |                |                |  |    |                |                |       |                |  |                 |  |  |                               |                               |                               |  |                  |                 |                 |           |       |  |       |     |      |       |  |      |  |       |     |     |  |       |  |      |  |  |     |      |     |  |     |     |       |

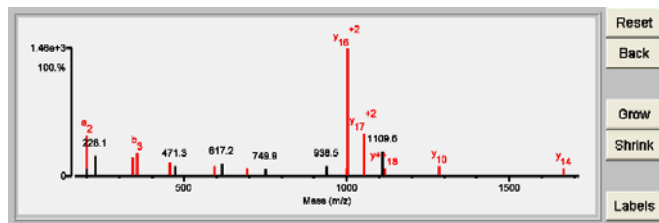

Result Summary

| Rank | Score | SPI (%) | BCS | # Unmatched Ions | Variable sites | Sequence                          | MH <sup>+</sup> Calculated (Da) | MH <sup>+</sup> Error (Da) | MH <sup>+</sup> Error (ppm) | Protein MW/pl (Da) | Species | Accession # | Protein Name                                               |
|------|-------|---------|-----|------------------|----------------|-----------------------------------|---------------------------------|----------------------------|-----------------------------|--------------------|---------|-------------|------------------------------------------------------------|
| 1    | 17.40 | 83.0    | 12  | 5/25             | K112k          | (R)GHYTGK <del>E</del> IDLVLDR(I) | 1842.0120                       | 114.0156                   | -14.0                       | 50135.9/4.94       | HUMAN   | Q71U36      | Tubulin alpha-1A chain OS=Homo sapiens GN=TUBA1A PE=1 SV=1 |
| 1    | 17.40 | 83.0    | 12  | 5/25             | K112k          | (R)GHYTGK <del>E</del> IDLVLDR(I) | 1842.0120                       | 114.0156                   | -14.0                       | 50151.9/4.94       | HUMAN   | P68363      | Tubulin alpha-1B chain OS=Homo sapiens GN=TUBA1B PE=1 SV=1 |
| 1    | 17.40 | 83.0    | 12  | 5/25             | K112k          | (R)GHYTGK <del>E</del> IDLVLDR(I) | 1842.0120                       | 114.0156                   | -14.0                       | 49895.6/4.96       | HUMAN   | Q9BQE3      | Tubulin alpha-1C chain OS=Homo sapiens GN=TUBA1C PE=1 SV=1 |

Detailed Results

| Rank | Score | SPI (%) | BCS | # Unmatched Ions | Variable sites | Sequence                           | MH <sup>+</sup> Calculated (Da) | MH <sup>+</sup> Error (Da) | MH <sup>+</sup> Error (ppm) | Protein MW/pl (Da) | Species | Accession # | MS-Digest Index # | Protein Name                                               |
|------|-------|---------|-----|------------------|----------------|------------------------------------|---------------------------------|----------------------------|-----------------------------|--------------------|---------|-------------|-------------------|------------------------------------------------------------|
| 1    | 17.40 | 83.0    | 12  | 5/25             | K112k          | (R)G H Y T G K E I D L V L D R (I) | 1842.0120                       | 114.0156                   | -14.0                       | 50135.9/4.94       | HUMAN   | Q71U36      | 770033            | Tubulin alpha-1A chain OS=Homo sapiens GN=TUBA1A PE=1 SV=1 |
| 1    | 17.40 | 83.0    | 12  | 5/25             | K112k          | (R)G H Y T G K E I D L V L D R (I) | 1842.0120                       | 114.0156                   | -14.0                       | 50151.9/4.94       | HUMAN   | P68363      | 770047            | Tubulin alpha-1B chain OS=Homo sapiens GN=TUBA1B PE=1 SV=1 |
| 1    | 17.40 | 83.0    | 12  | 5/25             | K112k          | (R)G H Y T G K E I D L V L D R (I) | 1842.0120                       | 114.0156                   | -14.0                       | 49895.6/4.96       | HUMAN   | Q9BQE3      | 770065            | Tubulin alpha-1C chain OS=Homo sapiens GN=TUBA1C PE=1 SV=1 |

  

| Fragment-ion (m/z)     | 84.078 | 86.094 | 167.086 | 175.113 | 178.057 | 195.083 | 358.144 | 403.224 | 441.176 | 459.193 | 500.734*2 | 502.293 | 543.285 | 554.261   | 557.279*2 | 572.266 | 613.815 | 615.369 | 628.317 | 730.399 | 843.475 | 881.476*2 | 956.555 | 1000.463 | 1085.590 |    |
|------------------------|--------|--------|---------|---------|---------|---------|---------|---------|---------|---------|-----------|---------|---------|-----------|-----------|---------|---------|---------|---------|---------|---------|-----------|---------|----------|----------|----|
| Frac. Inten.(% of TIC) | 7.00   | 0.31   | 1.94    | 5.18    | 2.32    | 9.05    | 3.59    | 4.39    | 1.52    | 2.30    | 2.77      | 4.44    | 4.20    | 2.82      | 2.79      | 2.14    | 1.58    | 6.95    | 1.56    | 12.90   | 9.83    | 2.25      | 3.79    | 1.64     | 2.73     |    |
| Rel. Inten.(% of BP)   | 54.30  | 2.39   | 15.03   | 40.19   | 17.96   | 70.15   | 27.84   | 34.02   | 11.81   | 17.86   | 21.47     | 34.43   | 32.57   | 21.86     | 21.65     | 16.58   | 12.25   | 53.89   | 12.09   | 100.00  | 76.22   | 17.46     | 29.37   | 12.69    | 21.13    |    |
| Score                  | -0.54  | 0.22   | -0.15   | 1.50    | -0.18   | 0.50    | 0.50    | 1.50    | 0.25    | 0.50    | 0.50      | 1.50    | -0.33   | 0.50      | 0.75      | 0.50    | 0.50    | 1.50    | -0.12   | 1.50    | 1.50    | 1.50      | 0.50    | 0.50     | 1.50     |    |
| Ion-type               | L1     | L1     | L1      | Y1      | Y1      | b2      | b3      | Y3      | b4-H2O  | b4      | b6*2      | Y4      |         | b5-H2O    | b9*2      | b5      | b+++10  | Y5      | Y6      | Y6      | Y7      | Y14*2     | Y6      | b8       | a9       |    |
| Delta ppm              |        | -31.7  |         | -36.3   |         | -32.0   | -22.0   | -13.5   | -29.2   | -13.8   | -25.6     | -11.7   |         | -21.8     | -17.5     | -31.8   | -25.7   | -21.8   |         | -14.5   | 31.8    | -17.4     | -23.9   | -23.1    | 13.9     |    |
|                        |        |        |         |         |         |         |         |         |         |         |           |         |         | HYTIG-H2O |           | HYTIG   |         |         |         |         |         |           |         |          |          | Y9 |
|                        |        |        |         |         |         |         |         |         |         |         |           |         |         | -21.8     |           | -31.8   |         |         |         |         | -21.7   |           |         |          | -27.7    |    |

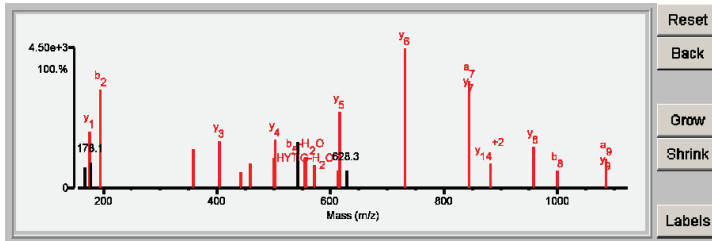

Result Summary

| Rank | Score | SPI (%) | BCS | # Unmatched Ions | Variable sites | Sequence               | MH <sup>+</sup> Calculated (Da) | MH <sup>+</sup> Error (Da) | MH <sup>+</sup> Error (ppm) | Protein MW(pI) (Da) | Species | Accession #            | Protein Name                                                 |
|------|-------|---------|-----|------------------|----------------|------------------------|---------------------------------|----------------------------|-----------------------------|---------------------|---------|------------------------|--------------------------------------------------------------|
| 1    | 17.78 | 84.6    | 9   | 5/25             | K326k          | (R)GDVVPkDVNAAIATIK(T) | 1610.9112                       | 114.0506                   | 4.5                         | 50135.9/4.94        | HUMAN   | <a href="#">Q71U36</a> | Tubulin alpha-1A chain OS=Homo sapiens GN=TUBA1A PE=1 SV=1   |
| 1    | 17.78 | 84.6    | 9   | 5/25             | K326k          | (R)GDVVPkDVNAAIATIK(T) | 1610.9112                       | 114.0506                   | 4.5                         | 50151.9/4.94        | HUMAN   | <a href="#">P68363</a> | Tubulin alpha-1B chain OS=Homo sapiens GN=TUBA1B PE=1 SV=1   |
| 1    | 17.78 | 84.6    | 9   | 5/25             | K326k          | (R)GDVVPkDVNAAIATIK(T) | 1610.9112                       | 114.0506                   | 4.5                         | 49895.6/4.96        | HUMAN   | <a href="#">Q9BQE3</a> | Tubulin alpha-1C chain OS=Homo sapiens GN=TUBA1C PE=1 SV=1   |
| 1    | 17.78 | 84.6    | 9   | 5/25             | K326k          | (R)GDVVPkDVNAAIATIK(T) | 1610.9112                       | 114.0506                   | 4.5                         | 49959.8/4.97        | HUMAN   | <a href="#">Q13748</a> | Tubulin alpha-3C/D chain OS=Homo sapiens GN=TUBA3C PE=1 SV=3 |
| 1    | 17.78 | 84.6    | 9   | 5/25             | K326k          | (R)GDVVPkDVNAAIATIK(T) | 1610.9112                       | 114.0506                   | 4.5                         | 49858.8/5.00        | HUMAN   | <a href="#">Q6PEY2</a> | Tubulin alpha-3E chain OS=Homo sapiens GN=TUBA3E PE=1 SV=2   |
| 2    | 7.35  | 67.9    | 4   | 13/25            | K336k          | (R)GDVVPkDVNAAIATIK(T) | 1610.9112                       | 114.0506                   | 4.5                         | 50135.9/4.94        | HUMAN   | <a href="#">Q71U36</a> | Tubulin alpha-1A chain OS=Homo sapiens GN=TUBA1A PE=1 SV=1   |

Detailed Results

| Rank | Score | SPI (%) | BCS | # Unmatched Ions | Variable sites | Sequence                   | MH <sup>+</sup> Calculated (Da) | MH <sup>+</sup> Error (Da) | MH <sup>+</sup> Error (ppm) | Protein MW(pI) (Da) | Species | Accession #            | MS-Digest Index #      | Protein Name                                                 |
|------|-------|---------|-----|------------------|----------------|----------------------------|---------------------------------|----------------------------|-----------------------------|---------------------|---------|------------------------|------------------------|--------------------------------------------------------------|
| 1    | 17.78 | 84.6    | 9   | 5/25             | K326k          | (R)GDVIVP/Pk/DVNAAIATIK(T) | 1610.9112                       | 114.0506                   | 4.5                         | 50135.9/4.94        | HUMAN   | <a href="#">Q71U36</a> | <a href="#">770033</a> | Tubulin alpha-1A chain OS=Homo sapiens GN=TUBA1A PE=1 SV=1   |
| 1    | 17.78 | 84.6    | 9   | 5/25             | K326k          | (R)GDVIVP/Pk/DVNAAIATIK(T) | 1610.9112                       | 114.0506                   | 4.5                         | 50151.9/4.94        | HUMAN   | <a href="#">P68363</a> | <a href="#">770047</a> | Tubulin alpha-1B chain OS=Homo sapiens GN=TUBA1B PE=1 SV=1   |
| 1    | 17.78 | 84.6    | 9   | 5/25             | K326k          | (R)GDVIVP/Pk/DVNAAIATIK(T) | 1610.9112                       | 114.0506                   | 4.5                         | 49895.6/4.96        | HUMAN   | <a href="#">Q9BQE3</a> | <a href="#">770065</a> | Tubulin alpha-1C chain OS=Homo sapiens GN=TUBA1C PE=1 SV=1   |
| 1    | 17.78 | 84.6    | 9   | 5/25             | K326k          | (R)GDVIVP/Pk/DVNAAIATIK(T) | 1610.9112                       | 114.0506                   | 4.5                         | 49959.8/4.97        | HUMAN   | <a href="#">Q13748</a> | <a href="#">770157</a> | Tubulin alpha-3C/D chain OS=Homo sapiens GN=TUBA3C PE=1 SV=3 |
| 1    | 17.78 | 84.6    | 9   | 5/25             | K326k          | (R)GDVIVP/Pk/DVNAAIATIK(T) | 1610.9112                       | 114.0506                   | 4.5                         | 49858.8/5.00        | HUMAN   | <a href="#">Q6PEY2</a> | <a href="#">770159</a> | Tubulin alpha-3E chain OS=Homo sapiens GN=TUBA3E PE=1 SV=2   |

  

| Fragment-ion (m/z)      | 70.065 | 72.082 | 84.080 | 86.096 | 127.051 | 130.089                         | 147.112        | 171.149 | 173.054        | 244.131        | 272.125        | 340.199 | 343.190        | 361.241        | 370.189 | 432.277        | 545.374        | 554.300 | 616.400        | 668.340*2 | 677.889*2                     | 727.408*2                     | 739.377 | 810.409         | 1015.583 |
|-------------------------|--------|--------|--------|--------|---------|---------------------------------|----------------|---------|----------------|----------------|----------------|---------|----------------|----------------|---------|----------------|----------------|---------|----------------|-----------|-------------------------------|-------------------------------|---------|-----------------|----------|
| Frac. Inten. (% of TIC) | 0.00   | 0.90   | 0.14   | 0.34   | 2.02    | 1.81                            | 3.16           | 2.03    | 1.96           | 1.85           | 12.53          | 2.52    | 1.87           | 2.02           | 3.22    | 2.67           | 2.06           | 2.29    | 1.89           | 4.66      | 38.94                         | 3.55                          | 2.29    | 3.51            | 1.76     |
| Rel. Inten. (% of BP)   | 0.01   | 2.32   | 0.37   | 0.89   | 5.19    | 4.65                            | 8.11           | 5.20    | 5.04           | 4.76           | 32.17          | 6.47    | 4.80           | 5.18           | 8.28    | 6.85           | 5.28           | 5.89    | 4.84           | 11.98     | 100.00                        | 9.10                          | 5.87    | 9.01            | 4.53     |
| Score                   | 0.20   | 0.50   | 0.50   | 0.22   | -0.05   | 0.50                            | 1.50           | -0.05   | 0.50           | 0.50           | 0.75           | 0.50    | 1.50           | 1.50           | -0.08   | 1.50           | 1.50           | 0.75    | 1.50           | 1.50      | 1.50                          | 1.50                          | 0.75    | 1.50            | 1.50     |
| Ion-type                | PR     | V      | KQ     | LI     |         | y <sub>1</sub> -NH <sub>3</sub> | y <sub>1</sub> |         | b <sub>2</sub> | a <sub>3</sub> | b <sub>3</sub> | PK      | a <sub>4</sub> | y <sub>3</sub> |         | y <sub>4</sub> | y <sub>5</sub> | PKDV    | y <sub>6</sub> |           | y <sub>12</sub> <sup>+2</sup> | y <sub>13</sub> <sup>+2</sup> | PKDVNA  | y <sub>10</sub> |          |
| Delta ppm               | -0.4   | 10.0   | -9.2   | -2.6   |         | 20.3                            | -4.8           |         | -14.9          | 2.9            | 0.0            | 1.1     | -25.3          | -9.5           |         | -11.2          | 15.5           | 9.6     | -4.4           |           | 1.4                           | -19.8                         | 3.9     | 4.3             |          |

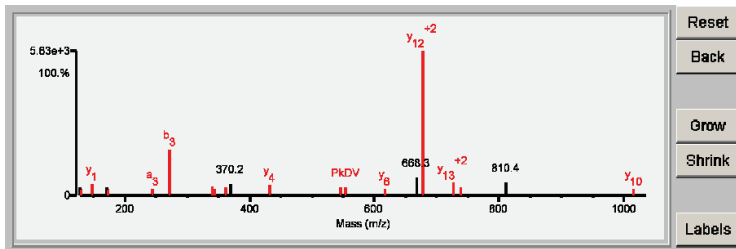

Result Summary

| Rank | Score | SPI (%) | BCS | # Unmatched Ions | Variable sites                        | Sequence  | MH <sup>+</sup> Calculated (Da) | MH <sup>+</sup> Error (Da) | MH <sup>+</sup> Error (ppm) | Protein MW/PI (Da) | Species                | Accession #                                                  | Protein Name |
|------|-------|---------|-----|------------------|---------------------------------------|-----------|---------------------------------|----------------------------|-----------------------------|--------------------|------------------------|--------------------------------------------------------------|--------------|
| 1    | 10.52 | 64.6    | 8   | 10/25            | K326k K336k (R)GDVVPKDVNAAAIATIKTK(R) | 1840.0538 | 228.1071                        | 10.3                       | 50135.9/4.94                | HUMAN              | <a href="#">Q71U36</a> | Tubulin alpha-1A chain OS=Homo sapiens GN=TUBA1A PE=1 SV=1   |              |
| 1    | 10.52 | 64.6    | 8   | 10/25            | K326k K336k (R)GDVVPKDVNAAAIATIKTK(R) | 1840.0538 | 228.1071                        | 10.3                       | 50151.9/4.94                | HUMAN              | <a href="#">P68363</a> | Tubulin alpha-1B chain OS=Homo sapiens GN=TUBA1B PE=1 SV=1   |              |
| 1    | 10.52 | 64.6    | 8   | 10/25            | K326k K336k (R)GDVVPKDVNAAAIATIKTK(R) | 1840.0538 | 228.1071                        | 10.3                       | 49895.6/4.96                | HUMAN              | <a href="#">Q9BQE3</a> | Tubulin alpha-1C chain OS=Homo sapiens GN=TUBA1C PE=1 SV=1   |              |
| 1    | 10.52 | 64.6    | 8   | 10/25            | K326k K336k (R)GDVVPKDVNAAAIATIKTK(R) | 1840.0538 | 228.1071                        | 10.3                       | 49959.8/4.97                | HUMAN              | <a href="#">Q13748</a> | Tubulin alpha-3C/D chain OS=Homo sapiens GN=TUBA3C PE=1 SV=3 |              |
| 1    | 10.52 | 64.6    | 8   | 10/25            | K326k K336k (R)GDVVPKDVNAAAIATIKTK(R) | 1840.0538 | 228.1071                        | 10.3                       | 49858.8/5.00                | HUMAN              | <a href="#">Q6PEY2</a> | Tubulin alpha-3E chain OS=Homo sapiens GN=TUBA3E PE=1 SV=2   |              |
| 2    | 6.93  | 58.6    | 6   | 12/25            | K326k K338k (R)GDVVPKDVNAAAIATIKTK(R) | 1840.0538 | 228.1071                        | 10.3                       | 50135.9/4.94                | HUMAN              | <a href="#">Q71U36</a> | Tubulin alpha-1A chain OS=Homo sapiens GN=TUBA1A PE=1 SV=1   |              |

Detailed Results

| Rank | Score | SPI (%) | BCS | # Unmatched Ions | Variable sites                                          | Sequence  | MH <sup>+</sup> Calculated (Da) | MH <sup>+</sup> Error (Da) | MH <sup>+</sup> Error (ppm) | Protein MW/PI (Da) | Species                | Accession #            | MS-Digest Index #                                            | Protein Name |
|------|-------|---------|-----|------------------|---------------------------------------------------------|-----------|---------------------------------|----------------------------|-----------------------------|--------------------|------------------------|------------------------|--------------------------------------------------------------|--------------|
| 1    | 10.52 | 64.6    | 8   | 10/25            | K326k K336k (R)G D\VVV P K D V N A A I /A/T/I/k/T/K (R) | 1840.0538 | 228.1071                        | 10.3                       | 50135.9/4.94                | HUMAN              | <a href="#">Q71U36</a> | <a href="#">770033</a> | Tubulin alpha-1A chain OS=Homo sapiens GN=TUBA1A PE=1 SV=1   |              |
| 1    | 10.52 | 64.6    | 8   | 10/25            | K326k K336k (R)G D\VVV P K D V N A A I /A/T/I/k/T/K (R) | 1840.0538 | 228.1071                        | 10.3                       | 50151.9/4.94                | HUMAN              | <a href="#">P68363</a> | <a href="#">770047</a> | Tubulin alpha-1B chain OS=Homo sapiens GN=TUBA1B PE=1 SV=1   |              |
| 1    | 10.52 | 64.6    | 8   | 10/25            | K326k K336k (R)G D\VVV P K D V N A A I /A/T/I/k/T/K (R) | 1840.0538 | 228.1071                        | 10.3                       | 49895.6/4.96                | HUMAN              | <a href="#">Q9BQE3</a> | <a href="#">770065</a> | Tubulin alpha-1C chain OS=Homo sapiens GN=TUBA1C PE=1 SV=1   |              |
| 1    | 10.52 | 64.6    | 8   | 10/25            | K326k K336k (R)G D\VVV P K D V N A A I /A/T/I/k/T/K (R) | 1840.0538 | 228.1071                        | 10.3                       | 49959.8/4.97                | HUMAN              | <a href="#">Q13748</a> | <a href="#">770157</a> | Tubulin alpha-3C/D chain OS=Homo sapiens GN=TUBA3C PE=1 SV=3 |              |
| 1    | 10.52 | 64.6    | 8   | 10/25            | K326k K336k (R)G D\VVV P K D V N A A I /A/T/I/k/T/K (R) | 1840.0538 | 228.1071                        | 10.3                       | 49858.8/5.00                | HUMAN              | <a href="#">Q6PEY2</a> | <a href="#">770159</a> | Tubulin alpha-3E chain OS=Homo sapiens GN=TUBA3E PE=1 SV=2   |              |

| Fragment-ion (m/z)      | 72.081 | 74.060 | 84.081 | 86.096 | 110.064 | 127.048 | 173.058 | 187.132 | 248.167 | 272.123 | 339.171 | 397.198 | 433.276 | 455.240*2 | 490.301 | 525.271 | 554.291 | 603.383 | 668.332 | 704.434 | 739.367 | 757.467 | 775.463 | 810.406 | 887.513 |
|-------------------------|--------|--------|--------|--------|---------|---------|---------|---------|---------|---------|---------|---------|---------|-----------|---------|---------|---------|---------|---------|---------|---------|---------|---------|---------|---------|
| Frac. Inten. (% of TIC) | 1.23   | 2.57   | 0.45   | 0.76   | 2.75    | 4.04    | 3.53    | 3.38    | 3.43    | 8.59    | 3.33    | 3.46    | 2.53    | 3.63      | 10.26   | 3.05    | 3.40    | 4.63    | 2.84    | 6.82    | 6.03    | 2.56    | 7.47    | 6.46    | 2.79    |
| Rel. Inten. (% of BP)   | 12.02  | 25.06  | 4.40   | 7.36   | 26.83   | 39.40   | 34.46   | 32.98   | 33.46   | 83.72   | 32.46   | 33.77   | 24.72   | 35.38     | 100.00  | 29.77   | 33.12   | 45.16   | 27.74   | 66.46   | 58.80   | 24.99   | 72.89   | 62.96   | 27.23   |
| Score                   | 0.50   | 1.50   | 0.50   | 0.22   | -0.27   | -0.39   | 0.50    | -0.33   | 1.50    | 0.50    | -0.32   | -0.34   | -0.25   | -0.35     | 1.50    | -0.30   | 0.75    | 1.50    | 0.75    | 1.50    | 0.75    | 0.50    | 1.50    | -0.63   | -0.27   |
| Ion-type                | V      | y++1   | KQ     | LI     |         |         | b2      |         | y2      | b3      |         |         |         |           | y3      |         | PKDV    | y4      | PKDVN   | y5      | PKDVNA  | y6-H2O  | y6      |         |         |
| Delta ppm               | -2.4   | 3.5    | 0.3    | -2.6   |         |         | 4.7     |         | 28.3    | -7.0    |         |         |         |           | 4.3     |         | -5.7    | 0.8     | -8.5    | 5.5     | -10.5   | 13.1    | -5.7    |         |         |

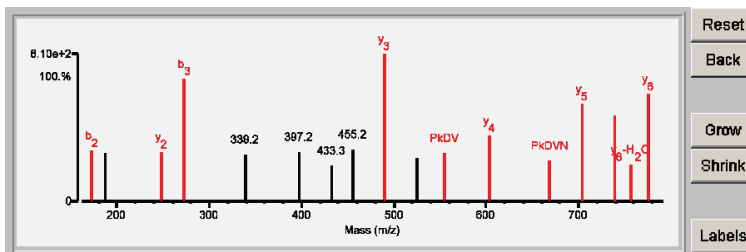

Reset

Back

Grow

Shrink

Labels



Result Summary

| Rank | Score | SPI (%) | BCS | # Unmatched Ions | Variable sites | Sequence          | MH <sup>+</sup> Calculated (Da) | MH <sup>+</sup> Error (Da) | MH <sup>+</sup> Error (ppm) | Protein MW/pl (Da) | Species | Accession #            | Protein Name                                                 |
|------|-------|---------|-----|------------------|----------------|-------------------|---------------------------------|----------------------------|-----------------------------|--------------------|---------|------------------------|--------------------------------------------------------------|
| 1    | 14.34 | 84.5    | 9   | 5/25             | K336k          | (K)DVNAAIATIKK(R) | 1244.7209                       | 114.0517                   | 6.4                         | 50135.9/4.94       | HUMAN   | <a href="#">Q71U36</a> | Tubulin alpha-1A chain OS=Homo sapiens GN=TUBA1A PE=1 SV=1   |
| 1    | 14.34 | 84.5    | 9   | 5/25             | K336k          | (K)DVNAAIATIKK(R) | 1244.7209                       | 114.0517                   | 6.4                         | 50151.9/4.94       | HUMAN   | <a href="#">P68363</a> | Tubulin alpha-1B chain OS=Homo sapiens GN=TUBA1B PE=1 SV=1   |
| 1    | 14.34 | 84.5    | 9   | 5/25             | K336k          | (K)DVNAAIATIKK(R) | 1244.7209                       | 114.0517                   | 6.4                         | 49895.6/4.96       | HUMAN   | <a href="#">Q9BQE3</a> | Tubulin alpha-1C chain OS=Homo sapiens GN=TUBA1C PE=1 SV=1   |
| 1    | 14.34 | 84.5    | 9   | 5/25             | K336k          | (K)DVNAAIATIKK(R) | 1244.7209                       | 114.0517                   | 6.4                         | 49959.8/4.97       | HUMAN   | <a href="#">Q13748</a> | Tubulin alpha-3C/D chain OS=Homo sapiens GN=TUBA3C PE=1 SV=3 |
| 1    | 14.34 | 84.5    | 9   | 5/25             | K336k          | (K)DVNAAIATIKK(R) | 1244.7209                       | 114.0517                   | 6.4                         | 49858.8/5.00       | HUMAN   | <a href="#">Q6PEY2</a> | Tubulin alpha-3E chain OS=Homo sapiens GN=TUBA3E PE=1 SV=2   |
| 2    | 12.66 | 80.2    | 8   | 6/25             | K338k          | (K)DVNAAIATIKK(R) | 1244.7209                       | 114.0517                   | 6.4                         | 50135.9/4.94       | HUMAN   | <a href="#">Q71U36</a> | Tubulin alpha-1A chain OS=Homo sapiens GN=TUBA1A PE=1 SV=1   |

Detailed Results

| Rank | Score | SPI (%) | BCS | # Unmatched Ions | Variable sites | Sequence                     | MH <sup>+</sup> Calculated (Da) | MH <sup>+</sup> Error (Da) | MH <sup>+</sup> Error (ppm) | Protein MW/pl (Da) | Species | Accession #            | MS-Digest Index #      | Protein Name                                                 |
|------|-------|---------|-----|------------------|----------------|------------------------------|---------------------------------|----------------------------|-----------------------------|--------------------|---------|------------------------|------------------------|--------------------------------------------------------------|
| 1    | 14.34 | 84.5    | 9   | 5/25             | K336k          | (K)D V N A A I A T I K K (R) | 1244.7209                       | 114.0517                   | 6.4                         | 50135.9/4.94       | HUMAN   | <a href="#">Q71U36</a> | <a href="#">770033</a> | Tubulin alpha-1A chain OS=Homo sapiens GN=TUBA1A PE=1 SV=1   |
| 1    | 14.34 | 84.5    | 9   | 5/25             | K336k          | (K)D V N A A I A T I K K (R) | 1244.7209                       | 114.0517                   | 6.4                         | 50151.9/4.94       | HUMAN   | <a href="#">P68363</a> | <a href="#">770047</a> | Tubulin alpha-1B chain OS=Homo sapiens GN=TUBA1B PE=1 SV=1   |
| 1    | 14.34 | 84.5    | 9   | 5/25             | K336k          | (K)D V N A A I A T I K K (R) | 1244.7209                       | 114.0517                   | 6.4                         | 49895.6/4.96       | HUMAN   | <a href="#">Q9BQE3</a> | <a href="#">770065</a> | Tubulin alpha-1C chain OS=Homo sapiens GN=TUBA1C PE=1 SV=1   |
| 1    | 14.34 | 84.5    | 9   | 5/25             | K336k          | (K)D V N A A I A T I K K (R) | 1244.7209                       | 114.0517                   | 6.4                         | 49959.8/4.97       | HUMAN   | <a href="#">Q13748</a> | <a href="#">770157</a> | Tubulin alpha-3C/D chain OS=Homo sapiens GN=TUBA3C PE=1 SV=3 |
| 1    | 14.34 | 84.5    | 9   | 5/25             | K336k          | (K)D V N A A I A T I K K (R) | 1244.7209                       | 114.0517                   | 6.4                         | 49858.8/5.00       | HUMAN   | <a href="#">Q6PEY2</a> | <a href="#">770159</a> | Tubulin alpha-3E chain OS=Homo sapiens GN=TUBA3E PE=1 SV=2   |

| Fragment-ion (m/z)      | 72.080 | 74.061 | 84.080 | 86.096 | 87.056 | 88.040 | 115.054 | 127.086 | 129.102 | 142.085 | 157.132 | 158.091 | 169.067 | 186.085 | 187.107 | 215.101 | 257.125 | 329.147 | 370.205 | 400.181 | 471.219 | 490.300 | 603.384 | 704.428 | 775.475 |
|-------------------------|--------|--------|--------|--------|--------|--------|---------|---------|---------|---------|---------|---------|---------|---------|---------|---------|---------|---------|---------|---------|---------|---------|---------|---------|---------|
| Frac. inten. (% of TIC) | 0.33   | 4.22   | 0.63   | 0.76   | 0.10   | 2.23   | 2.48    | 3.90    | 0.11    | 3.70    | 2.50    | 4.67    | 2.97    | 6.48    | 23.35   | 3.40    | 4.23    | 4.32    | 3.17    | 2.28    | 4.00    | 8.73    | 3.37    | 2.98    | 5.11    |
| Rel. inten. (% of BP)   | 1.40   | 18.09  | 2.69   | 3.26   | 0.42   | 9.57   | 10.63   | 16.70   | 0.49    | 15.83   | 10.72   | 20.00   | 12.71   | 27.75   | 100.00  | 14.55   | 18.13   | 18.51   | 13.56   | 9.76    | 17.12   | 37.39   | 14.42   | 12.77   | 21.87   |
| Score                   | 0.50   | 1.50   | 0.50   | 0.22   | 0.33   | 0.50   | -0.11   | -0.17   | 0.20    | -0.16   | -0.11   | 0.50    | -0.13   | 0.75    | 0.50    | 0.75    | 0.50    | 0.75    | 0.50    | 0.50    | 1.50    | 1.50    | 1.50    | 1.50    | 1.50    |
| Ion-type                | V      | y++1   | KQ     | LI     | NR     | a1     |         |         | RKQ     |         |         | NA-28   |         | NA      | a2      | b2      | NAA     | b3      | NAAI    | b4      | b5      | y3      | y4      | y5      | y6      |
| Delta ppm               | -13.5  | 15.7   | -5.7   | -6.1   | 8.2    | -10.2  |         |         | -0.3    |         |         | -15.2   |         | -17.3   | -8.1    | -12.7   | -2.4    | 0.4     | -13.5   | -5.9    | -4.6    | 3.3     | 2.6     | -3.4    | 10.1    |

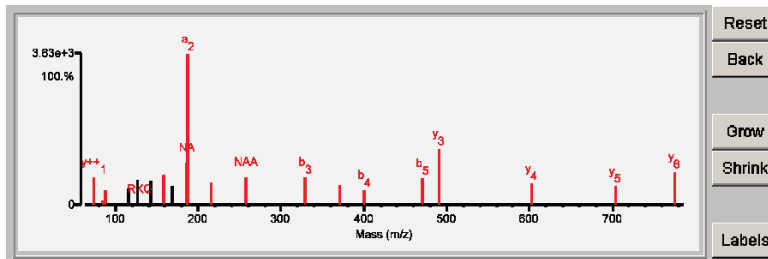

Result Summary

| Rank | Score | SPI (%) | BCS | # Unmatched Ions | Variable sites | Sequence                   | MH <sup>+</sup> Calculated (Da) | MH <sup>+</sup> Error (Da) | MH <sup>+</sup> Error (ppm) | Protein MW/pi (Da) | Species | Accession #             | Protein Name                                                                |
|------|-------|---------|-----|------------------|----------------|----------------------------|---------------------------------|----------------------------|-----------------------------|--------------------|---------|-------------------------|-----------------------------------------------------------------------------|
| 1    | 20.07 | 97.3    | 10  | 2/25             | K370k          | (K)VGINYQPPTVPGGDLAKVQR(A) | 2208.2135                       | 114.0585                   | 6.7                         | 50135.9/4.94       | HUMAN   | <a href="#">Q71U36</a>  | Tubulin alpha-1A chain OS=Homo sapiens GN=TUBA1A PE=1 SV=1                  |
| 1    | 20.07 | 97.3    | 10  | 2/25             | K370k          | (K)VGINYQPPTVPGGDLAKVQR(A) | 2208.2135                       | 114.0585                   | 6.7                         | 50151.9/4.94       | HUMAN   | <a href="#">P68363</a>  | Tubulin alpha-1B chain OS=Homo sapiens GN=TUBA1B PE=1 SV=1                  |
| 1    | 20.07 | 97.3    | 10  | 2/25             | K370k          | (K)VGINYQPPTVPGGDLAKVQR(A) | 2208.2135                       | 114.0585                   | 6.7                         | 49895.6/4.96       | HUMAN   | <a href="#">Q9BQE3</a>  | Tubulin alpha-1C chain OS=Homo sapiens GN=TUBA1C PE=1 SV=1                  |
| 1    | 20.07 | 97.3    | 10  | 2/25             | K370k          | (K)VGINYQPPTVPGGDLAKVQR(A) | 2208.2135                       | 114.0585                   | 6.7                         | 49959.8/4.97       | HUMAN   | <a href="#">Q13748</a>  | Tubulin alpha-3C/D chain OS=Homo sapiens GN=TUBA3C PE=1 SV=3                |
| 1    | 20.07 | 97.3    | 10  | 2/25             | K370k          | (K)VGINYQPPTVPGGDLAKVQR(A) | 2208.2135                       | 114.0585                   | 6.7                         | 49858.8/5.00       | HUMAN   | <a href="#">Q6PEY2</a>  | Tubulin alpha-3E chain OS=Homo sapiens GN=TUBA3E PE=1 SV=2                  |
| 1    | 20.07 | 97.3    | 10  | 2/25             | K370k          | (K)VGINYQPPTVPGGDLAKVQR(A) | 2208.2135                       | 114.0585                   | 6.7                         | 49924.7/4.95       | HUMAN   | <a href="#">P68366</a>  | Tubulin alpha-4A chain OS=Homo sapiens GN=TUBA4A PE=1 SV=1                  |
| 1    | 20.07 | 97.3    | 10  | 2/25             | K370k          | (K)VGINYQPPTVPGGDLAKVQR(A) | 2208.2135                       | 114.0585                   | 6.7                         | 50093.8/4.94       | HUMAN   | <a href="#">Q9NY65</a>  | Tubulin alpha-8 chain OS=Homo sapiens GN=TUBA8 PE=1 SV=1                    |
| 2    | 3.32  | 69.0    | 1   | 17/25            | K775k          | (K)SLPGRSLVLDLPVNVVDTK(A)  | 2208.2598                       | 114.0122                   | -13.2                       | 193754.0/8.22      | HUMAN   | <a href="#">RQ460N5</a> | REVERSE Poly [ADP-ribose] polymerase 14 OS=Homo sapiens GN=PARP14 PE=2 SV=2 |

Detailed Results

| Rank | Score | SPI (%) | BCS | # Unmatched Ions | Variable sites | Sequence                                                          | MH <sup>+</sup> Calculated (Da) | MH <sup>+</sup> Error (Da) | MH <sup>+</sup> Error (ppm) | Protein MW/pi (Da) | Species | Accession #            | MS-Digest Index #      | Protein Name                                                 |
|------|-------|---------|-----|------------------|----------------|-------------------------------------------------------------------|---------------------------------|----------------------------|-----------------------------|--------------------|---------|------------------------|------------------------|--------------------------------------------------------------|
| 1    | 20.07 | 97.3    | 10  | 2/25             | K370k          | (K) V G I N Y Q I P P T V I V I P / G G D / L / A / k / V Q R (A) | 2208.2135                       | 114.0585                   | 6.7                         | 50135.9/4.94       | HUMAN   | <a href="#">Q71U36</a> | <a href="#">770033</a> | Tubulin alpha-1A chain OS=Homo sapiens GN=TUBA1A PE=1 SV=1   |
| 1    | 20.07 | 97.3    | 10  | 2/25             | K370k          | (K) V G I N Y Q I P P T V I V I P / G G D / L / A / k / V Q R (A) | 2208.2135                       | 114.0585                   | 6.7                         | 50151.9/4.94       | HUMAN   | <a href="#">P68363</a> | <a href="#">770047</a> | Tubulin alpha-1B chain OS=Homo sapiens GN=TUBA1B PE=1 SV=1   |
| 1    | 20.07 | 97.3    | 10  | 2/25             | K370k          | (K) V G I N Y Q I P P T V I V I P / G G D / L / A / k / V Q R (A) | 2208.2135                       | 114.0585                   | 6.7                         | 49895.6/4.96       | HUMAN   | <a href="#">Q9BQE3</a> | <a href="#">770065</a> | Tubulin alpha-1C chain OS=Homo sapiens GN=TUBA1C PE=1 SV=1   |
| 1    | 20.07 | 97.3    | 10  | 2/25             | K370k          | (K) V G I N Y Q I P P T V I V I P / G G D / L / A / k / V Q R (A) | 2208.2135                       | 114.0585                   | 6.7                         | 49959.8/4.97       | HUMAN   | <a href="#">Q13748</a> | <a href="#">770157</a> | Tubulin alpha-3C/D chain OS=Homo sapiens GN=TUBA3C PE=1 SV=3 |
| 1    | 20.07 | 97.3    | 10  | 2/25             | K370k          | (K) V G I N Y Q I P P T V I V I P / G G D / L / A / k / V Q R (A) | 2208.2135                       | 114.0585                   | 6.7                         | 49858.8/5.00       | HUMAN   | <a href="#">Q6PEY2</a> | <a href="#">770159</a> | Tubulin alpha-3E chain OS=Homo sapiens GN=TUBA3E PE=1 SV=2   |
| 1    | 20.07 | 97.3    | 10  | 2/25             | K370k          | (K) V G I N Y Q I P P T V I V I P / G G D / L / A / k / V Q R (A) | 2208.2135                       | 114.0585                   | 6.7                         | 49924.7/4.95       | HUMAN   | <a href="#">P68366</a> | <a href="#">770185</a> | Tubulin alpha-4A chain OS=Homo sapiens GN=TUBA4A PE=1 SV=1   |
| 1    | 20.07 | 97.3    | 10  | 2/25             | K370k          | (K) V G I N Y Q I P P T V I V I P / G G D / L / A / k / V Q R (A) | 2208.2135                       | 114.0585                   | 6.7                         | 50093.8/4.94       | HUMAN   | <a href="#">Q9NY65</a> | <a href="#">770219</a> | Tubulin alpha-8 chain OS=Homo sapiens GN=TUBA8 PE=1 SV=1     |

  

| Fragment-ion (m/z)      | 70.064 | 72.080 | 86.097 | 327.128 | 395.230 | 402.242 | 419.141 | 494.296 | 526.286 <sup>+2</sup>                           | 547.285        | 577.819 <sup>+2</sup>         | 627.364 <sup>+2</sup>         | 644.389        | 658.321                         | 675.345        | 715.427        | 824.464 <sup>+2</sup>         | 828.510        | 879.458 <sup>+2</sup>                           | 953.474 <sup>+2</sup> | 970.510        | 1057.584        | 1069.573        | 1154.630        | 1168.638 |
|-------------------------|--------|--------|--------|---------|---------|---------|---------|---------|-------------------------------------------------|----------------|-------------------------------|-------------------------------|----------------|---------------------------------|----------------|----------------|-------------------------------|----------------|-------------------------------------------------|-----------------------|----------------|-----------------|-----------------|-----------------|----------|
| Frac. Inten. (% of TIC) | 0.00   | 0.17   | 0.07   | 2.26    | 1.66    | 1.12    | 1.12    | 3.16    | 2.43                                            | 1.43           | 24.23                         | 1.83                          | 1.40           | 2.15                            | 3.79           | 1.81           | 28.02                         | 1.17           | 2.30                                            | 6.07                  | 1.70           | 1.51            | 2.04            | 11.23           | 2.37     |
| Rel. Inten. (% of BP)   | 0.01   | 0.60   | 0.26   | 8.07    | 5.92    | 4.01    | 4.01    | 11.29   | 8.66                                            | 5.09           | 86.48                         | 6.52                          | 4.99           | 7.66                            | 13.53          | 6.46           | 100.00                        | 4.17           | 8.19                                            | 6.07                  | 3.68           | 5.40            | 7.29            | 40.08           | 8.44     |
| Score                   | 0.20   | 0.50   | 0.22   | 0.75    | 0.75    | 1.50    | -0.04   | 0.75    | 0.25                                            | 0.50           | 1.50                          | 1.50                          | 1.50           | 0.25                            | 0.50           | 1.50           | 1.50                          | 1.50           | 0.50                                            | -0.06                 | 0.50           | 1.50            | 0.50            | 1.50            | 0.50     |
| Ion-type                | PR     | a1     | L1     | PGGD    | PPTV    | ys      | ys      | PTWVP   | b <sub>10</sub> -H <sub>2</sub> O <sup>+2</sup> | b <sub>5</sub> | y <sub>10</sub> <sup>+2</sup> | y <sub>11</sub> <sup>+2</sup> | y <sub>4</sub> | b <sub>6</sub> -NH <sub>3</sub> | b <sub>6</sub> | y <sub>5</sub> | y <sub>15</sub> <sup>+2</sup> | y <sub>6</sub> | y <sub>16</sub> -H <sub>2</sub> O <sup>+2</sup> | b <sub>9</sub>        | y <sub>9</sub> | b <sub>10</sub> | y <sub>10</sub> | b <sub>11</sub> |          |
| Delta ppm               | -11.8  | -21.8  | 2.0    | -8.6    | -1.0    | -10.3   |         | -4.9    | 5.4                                             | -6.5           | 3.0                           | 19.5                          | 8.0            | 0.0                             | -3.8           | 8.2            | 2.2                           | 6.1            | -32.1                                           |                       | 10.2           | 8.5             | 3.6             | 1.9             | 0.4      |
|                         |        | V      |        |         |         |         |         |         |                                                 |                |                               |                               |                |                                 |                |                |                               |                |                                                 |                       |                |                 |                 |                 |          |
|                         |        | -6.6   |        |         |         |         |         |         |                                                 |                |                               |                               |                |                                 |                |                |                               |                |                                                 |                       |                |                 |                 |                 |          |

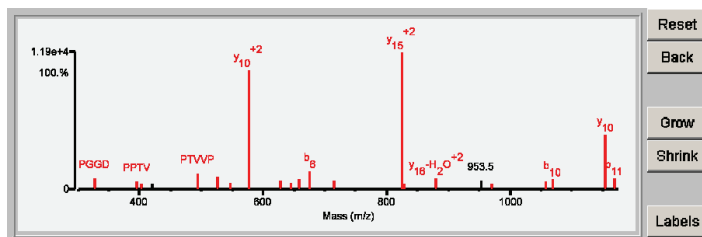

Result Summary

| Rank | Score | SPI (%) | BCS | # Unmatched Ions | Variable sites | Sequence                       | MH <sup>+</sup> Calculated (Da) | MH <sup>+</sup> Error (Da) | MH <sup>+</sup> Error (ppm) | Protein MW/pl (Da) | Species | Accession #             | Protein Name                                                      |
|------|-------|---------|-----|------------------|----------------|--------------------------------|---------------------------------|----------------------------|-----------------------------|--------------------|---------|-------------------------|-------------------------------------------------------------------|
| 1    | 24.96 | 94.5    | 15  | 3/25             | K60k           | (K)TIGGGDDSFNTFFSETGAGkHVPR(A) | 2497.1742                       | 114.0391                   | -1.5                        | 50135.9/4.94       | HUMAN   | <a href="#">Q71U36</a>  | Tubulin alpha-1A chain OS=Homo sapiens GN=TUBA1A PE=1 SV=1        |
| 1    | 24.96 | 94.5    | 15  | 3/25             | K60k           | (K)TIGGGDDSFNTFFSETGAGkHVPR(A) | 2497.1742                       | 114.0391                   | -1.5                        | 50151.9/4.94       | HUMAN   | <a href="#">P68363</a>  | Tubulin alpha-1B chain OS=Homo sapiens GN=TUBA1B PE=1 SV=1        |
| 1    | 24.96 | 94.5    | 15  | 3/25             | K60k           | (K)TIGGGDDSFNTFFSETGAGkHVPR(A) | 2497.1742                       | 114.0391                   | -1.5                        | 49895.6/4.96       | HUMAN   | <a href="#">Q9BQE3</a>  | Tubulin alpha-1C chain OS=Homo sapiens GN=TUBA1C PE=1 SV=1        |
| 1    | 24.96 | 94.5    | 15  | 3/25             | K60k           | (K)TIGGGDDSFNTFFSETGAGkHVPR(A) | 2497.1742                       | 114.0391                   | -1.5                        | 49959.8/4.97       | HUMAN   | <a href="#">Q13748</a>  | Tubulin alpha-3C/D chain OS=Homo sapiens GN=TUBA3C PE=1 SV=3      |
| 1    | 24.96 | 94.5    | 15  | 3/25             | K60k           | (K)TIGGGDDSFNTFFSETGAGkHVPR(A) | 2497.1742                       | 114.0391                   | -1.5                        | 49858.8/5.00       | HUMAN   | <a href="#">Q6PEY2</a>  | Tubulin alpha-3E chain OS=Homo sapiens GN=TUBA3E PE=1 SV=2        |
| 2    | 5.61  | 54.1    | 1   | 13/25            | M52m K53k      | (K)DMKSFIKDVRQEPTLGDENmk(M)    | 2481.2112                       | 130.0021                   | -13.7                       | 22142.5/5.01       | HUMAN   | <a href="#">RP62760</a> | REVERSE Visinin-like protein 1 OS=Homo sapiens GN=VSNL1 PE=1 SV=2 |

Detailed Results

| Rank | Score | SPI (%) | BCS | # Unmatched Ions | Variable sites | Sequence                       | MH <sup>+</sup> Calculated (Da) | MH <sup>+</sup> Error (Da) | MH <sup>+</sup> Error (ppm) | Protein MW/pl (Da) | Species | Accession #            | MS-Digest Index #      | Protein Name                                                 |
|------|-------|---------|-----|------------------|----------------|--------------------------------|---------------------------------|----------------------------|-----------------------------|--------------------|---------|------------------------|------------------------|--------------------------------------------------------------|
| 1    | 24.96 | 94.5    | 15  | 3/25             | K60k           | (K)TIGGGDDSFNTFFSETGAGkHVPR(A) | 2497.1742                       | 114.0391                   | -1.5                        | 50135.9/4.94       | HUMAN   | <a href="#">Q71U36</a> | <a href="#">770033</a> | Tubulin alpha-1A chain OS=Homo sapiens GN=TUBA1A PE=1 SV=1   |
| 1    | 24.96 | 94.5    | 15  | 3/25             | K60k           | (K)TIGGGDDSFNTFFSETGAGkHVPR(A) | 2497.1742                       | 114.0391                   | -1.5                        | 50151.9/4.94       | HUMAN   | <a href="#">P68363</a> | <a href="#">770047</a> | Tubulin alpha-1B chain OS=Homo sapiens GN=TUBA1B PE=1 SV=1   |
| 1    | 24.96 | 94.5    | 15  | 3/25             | K60k           | (K)TIGGGDDSFNTFFSETGAGkHVPR(A) | 2497.1742                       | 114.0391                   | -1.5                        | 49895.6/4.96       | HUMAN   | <a href="#">Q9BQE3</a> | <a href="#">770065</a> | Tubulin alpha-1C chain OS=Homo sapiens GN=TUBA1C PE=1 SV=1   |
| 1    | 24.96 | 94.5    | 15  | 3/25             | K60k           | (K)TIGGGDDSFNTFFSETGAGkHVPR(A) | 2497.1742                       | 114.0391                   | -1.5                        | 49959.8/4.97       | HUMAN   | <a href="#">Q13748</a> | <a href="#">770157</a> | Tubulin alpha-3C/D chain OS=Homo sapiens GN=TUBA3C PE=1 SV=3 |
| 1    | 24.96 | 94.5    | 15  | 3/25             | K60k           | (K)TIGGGDDSFNTFFSETGAGkHVPR(A) | 2497.1742                       | 114.0391                   | -1.5                        | 49858.8/5.00       | HUMAN   | <a href="#">Q6PEY2</a> | <a href="#">770159</a> | Tubulin alpha-3E chain OS=Homo sapiens GN=TUBA3E PE=1 SV=2   |

| Fragment-ion (m/z)      | 74.059         | 86.094         | 101.068 | 120.079 | 121.081 | 175.117        | 187.142        | 215.136        | 272.170        | 345.153 | 371.239        | 508.289        | 518.791 <sup>+2</sup>        | 583.302 <sup>+2</sup>         | 626.815 <sup>+2</sup>         | 700.356 <sup>+2</sup>         | 773.891 <sup>+2</sup>         | 793.685 <sup>+3</sup>                           | 807.460        | 824.415 <sup>+2</sup>         | 872.922 <sup>+2</sup>                          | 881.429 <sup>+2</sup>         | 935.511        | 945.960 <sup>+2</sup> | 1036.564 |
|-------------------------|----------------|----------------|---------|---------|---------|----------------|----------------|----------------|----------------|---------|----------------|----------------|------------------------------|-------------------------------|-------------------------------|-------------------------------|-------------------------------|-------------------------------------------------|----------------|-------------------------------|------------------------------------------------|-------------------------------|----------------|-----------------------|----------|
| Frac. Inten. (% of TIC) | 3.54           | 0.09           | 1.94    | 0.60    | 1.63    | 1.80           | 21.35          | 3.21           | 7.26           | 1.97    | 2.56           | 2.14           | 3.47                         | 1.63                          | 7.46                          | 11.87                         | 6.13                          | 2.82                                            | 1.76           | 3.72                          | 2.30                                           | 2.91                          | 2.54           | 3.32                  | 1.97     |
| Rel. Inten. (% of BP)   | 16.59          | 0.44           | 9.09    | 2.79    | 7.65    | 8.44           | 100.00         | 15.03          | 34.02          | 9.21    | 11.97          | 10.02          | 16.23                        | 7.65                          | 34.93                         | 55.57                         | 28.71                         | 13.20                                           | 8.26           | 17.44                         | 10.75                                          | 13.65                         | 11.90          | 15.53                 | 9.23     |
| Score                   | 0.50           | 0.22           | -0.09   | 1.00    | -0.08   | 1.50           | 0.50           | 1.50           | 1.50           | -0.09   | 1.50           | 1.50           | 1.50                         | 1.50                          | 1.50                          | 1.50                          | 1.50                          | 0.50                                            | 1.50           | 1.50                          | 0.50                                           | 1.50                          | 1.50           | 0.50                  | 1.50     |
| Ion-type                | a <sub>1</sub> | L <sub>1</sub> |         | F       |         | y <sub>1</sub> | a <sub>2</sub> | b <sub>2</sub> | b <sub>3</sub> |         | y <sub>3</sub> | y <sub>4</sub> | y <sub>9</sub> <sup>+2</sup> | y <sub>10</sub> <sup>+2</sup> | y <sub>11</sub> <sup>+2</sup> | y <sub>12</sub> <sup>+2</sup> | y <sub>13</sub> <sup>+2</sup> | y <sub>22</sub> -H <sub>2</sub> O <sup>+3</sup> | y <sub>6</sub> | y <sub>14</sub> <sup>+2</sup> | y <sub>15</sub> -NH <sub>3</sub> <sup>+2</sup> | y <sub>15</sub> <sup>+2</sup> | y <sub>8</sub> | y <sub>9</sub>        |          |
| Delta ppm               | -30.2          | -24.7          |         | -14.8   |         | -8.9           | -18.2          | -17.7          |                |         | -3.3           | -19.6          | 10.3                         | -8.9                          | -12.9                         | -2.4                          | -1.4                          | -14.3                                           | 2.5            | -1.1                          | -1.9                                           | -9.5                          | -6.8           | -6.3                  | -0.9     |

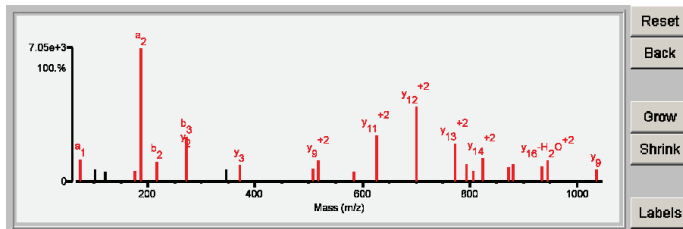

Result Summary

| Rank | Score | SPI (%) | BCS | # Unmatched Ions | Variable sites | Sequence                    | MH <sup>+</sup> Calculated (Da) | MH <sup>+</sup> Error (Da) | MH <sup>+</sup> Error (ppm) | Protein MW/pl (Da) | Species | Accession # | Protein Name                                                 |
|------|-------|---------|-----|------------------|----------------|-----------------------------|---------------------------------|----------------------------|-----------------------------|--------------------|---------|-------------|--------------------------------------------------------------|
| 1    | 19.93 | 93.1    | 10  | 2/25             | K96k           | (R)QLFHPEQLITGKEDAANNYAR(G) | 2415.2051                       | 114.0590                   | 6.4                         | 50135.9/4.94       | HUMAN   | Q71U36      | Tubulin alpha-1A chain OS=Homo sapiens GN=TUBA1A PE=1 SV=1   |
| 1    | 19.93 | 93.1    | 10  | 2/25             | K96k           | (R)QLFHPEQLITGKEDAANNYAR(G) | 2415.2051                       | 114.0590                   | 6.4                         | 50151.9/4.94       | HUMAN   | P68363      | Tubulin alpha-1B chain OS=Homo sapiens GN=TUBA1B PE=1 SV=1   |
| 1    | 19.93 | 93.1    | 10  | 2/25             | K96k           | (R)QLFHPEQLITGKEDAANNYAR(G) | 2415.2051                       | 114.0590                   | 6.4                         | 49895.6/4.96       | HUMAN   | Q9BQE3      | Tubulin alpha-1C chain OS=Homo sapiens GN=TUBA1C PE=1 SV=1   |
| 1    | 19.93 | 93.1    | 10  | 2/25             | K96k           | (R)QLFHPEQLITGKEDAANNYAR(G) | 2415.2051                       | 114.0590                   | 6.4                         | 49959.8/4.97       | HUMAN   | Q13748      | Tubulin alpha-3C/D chain OS=Homo sapiens GN=TUBA3C PE=1 SV=3 |
| 1    | 19.93 | 93.1    | 10  | 2/25             | K96k           | (R)QLFHPEQLITGKEDAANNYAR(G) | 2415.2051                       | 114.0590                   | 6.4                         | 49924.7/4.95       | HUMAN   | P68366      | Tubulin alpha-4A chain OS=Homo sapiens GN=TUBA4A PE=1 SV=1   |
| 1    | 19.93 | 93.1    | 10  | 2/25             | K96k           | (R)QLFHPEQLITGKEDAANNYAR(G) | 2415.2051                       | 114.0590                   | 6.4                         | 50093.8/4.94       | HUMAN   | Q9NY65      | Tubulin alpha-8 chain OS=Homo sapiens GN=TUBA8 PE=1 SV=1     |

Detailed Results

| Rank | Score | SPI (%) | BCS | # Unmatched Ions | Variable sites | Sequence                    | MH <sup>+</sup> Calculated (Da) | MH <sup>+</sup> Error (Da) | MH <sup>+</sup> Error (ppm) | Protein MW/pl (Da) | Species | Accession # | MS-Digest Index # | Protein Name                                                 |
|------|-------|---------|-----|------------------|----------------|-----------------------------|---------------------------------|----------------------------|-----------------------------|--------------------|---------|-------------|-------------------|--------------------------------------------------------------|
| 1    | 19.93 | 93.1    | 10  | 2/25             | K96k           | (R)QLFHPEQLITGKEDAANNYAR(G) | 2415.2051                       | 114.0590                   | 6.4                         | 50135.9/4.94       | HUMAN   | Q71U36      | 770033            | Tubulin alpha-1A chain OS=Homo sapiens GN=TUBA1A PE=1 SV=1   |
| 1    | 19.93 | 93.1    | 10  | 2/25             | K96k           | (R)QLFHPEQLITGKEDAANNYAR(G) | 2415.2051                       | 114.0590                   | 6.4                         | 50151.9/4.94       | HUMAN   | P68363      | 770047            | Tubulin alpha-1B chain OS=Homo sapiens GN=TUBA1B PE=1 SV=1   |
| 1    | 19.93 | 93.1    | 10  | 2/25             | K96k           | (R)QLFHPEQLITGKEDAANNYAR(G) | 2415.2051                       | 114.0590                   | 6.4                         | 49895.6/4.96       | HUMAN   | Q9BQE3      | 770065            | Tubulin alpha-1C chain OS=Homo sapiens GN=TUBA1C PE=1 SV=1   |
| 1    | 19.93 | 93.1    | 10  | 2/25             | K96k           | (R)QLFHPEQLITGKEDAANNYAR(G) | 2415.2051                       | 114.0590                   | 6.4                         | 49959.8/4.97       | HUMAN   | Q13748      | 770157            | Tubulin alpha-3C/D chain OS=Homo sapiens GN=TUBA3C PE=1 SV=3 |
| 1    | 19.93 | 93.1    | 10  | 2/25             | K96k           | (R)QLFHPEQLITGKEDAANNYAR(G) | 2415.2051                       | 114.0590                   | 6.4                         | 49924.7/4.95       | HUMAN   | P68366      | 770185            | Tubulin alpha-4A chain OS=Homo sapiens GN=TUBA4A PE=1 SV=1   |
| 1    | 19.93 | 93.1    | 10  | 2/25             | K96k           | (R)QLFHPEQLITGKEDAANNYAR(G) | 2415.2051                       | 114.0590                   | 6.4                         | 50093.8/4.94       | HUMAN   | Q9NY65      | 770219            | Tubulin alpha-8 chain OS=Homo sapiens GN=TUBA8 PE=1 SV=1     |

  

| Fragment-ion (m/z)     | 84.044 | 84.081 | 86.096 | 110.070 | 120.080 | 175.115 | 196.144 | 355.158 | 371.197 | 409.231              | 431.716 <sup>+2</sup> | 440.711 <sup>+2</sup> | 488.255 <sup>+2</sup> | 509.253 | 523.264 | 530.797 <sup>+2</sup> | 637.313           | 661.804 <sup>+2</sup> | 712.330 <sup>+2</sup> | 779.387 | 862.410 | 880.414 | 894.418 | 976.493 | 1023.460 |
|------------------------|--------|--------|--------|---------|---------|---------|---------|---------|---------|----------------------|-----------------------|-----------------------|-----------------------|---------|---------|-----------------------|-------------------|-----------------------|-----------------------|---------|---------|---------|---------|---------|----------|
| Frac. Inten.(% of TIC) | 0.10   | 0.36   | 0.96   | 0.21    | 0.12    | 6.16    | 3.62    | 4.44    | 3.93    | 3.20                 | 4.74                  | 4.29                  | 4.71                  | 6.13    | 5.23    | 3.33                  | 5.67              | 6.32                  | 5.43                  | 4.38    | 6.04    | 3.16    | 6.13    | 4.69    | 6.65     |
| Rel. Inten.(% of BP)   | 1.51   | 5.41   | 14.44  | 3.13    | 1.83    | 92.75   | 54.41   | 66.82   | 59.14   | 48.13                | 71.33                 | 64.58                 | 70.90                 | 92.25   | 78.67   | 50.13                 | 85.29             | 95.09                 | 81.75                 | 65.84   | 90.80   | 47.51   | 92.25   | 70.59   | 100.00   |
| Score                  | 1.00   | 0.50   | 0.22   | 1.00    | 1.00    | 1.50    | -0.54   | 0.75    | 0.75    | 1.50                 | 0.25                  | 0.50                  | 0.25                  | 0.25    | 1.50    | -0.50                 | 1.50              | 1.50                  | 1.50                  | 1.50    | 0.25    | 0.50    | 1.50    | 0.25    | 1.50     |
| Ion-type               | E      | KQ     | LI     | H       | F       | y1      | PEQ     | EQL     | y3      | b7-H2O <sup>+2</sup> | b7 <sup>+2</sup>      | b8-H2O <sup>+2</sup>  | b4-NH3                | y4      | y5      | y11 <sup>+2</sup>     | y12 <sup>+2</sup> | y7                    | b7-H2O                | b7      | y8      | b8-NH3  | y9      |         |          |
| Delta ppm              | -5.8   | -0.9   | -4.9   | -15.2   | -8.1    | -22.0   | -11.0   | 9.1     | 27.9    | 3.5                  | -20.2                 | -3.5                  | 1.8                   | 3.6     | 12.6    | -5.6                  | -2.2              | 9.1                   | -13.6                 | -20.5   | 13.4    | 3.6     |         |         |          |

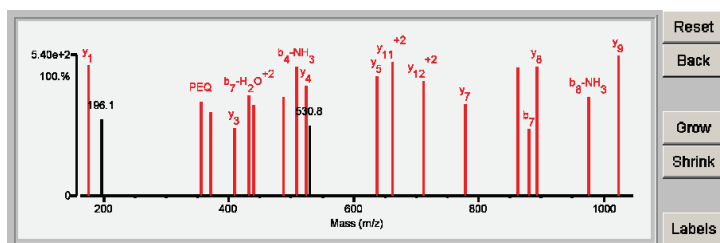

Reset

Back

Grow

Shrink

Labels

Result Summary

| Rank | Score | SPI (%) | BCS | # Unmatched Ions | Variable sites | Sequence                                    | MH <sup>+</sup> Calculated (Da) | MH <sup>+</sup> Error (Da) | MH <sup>+</sup> Error (ppm) | Protein MW (Da) | Species | Accession # | Protein Name                                                                                              |
|------|-------|---------|-----|------------------|----------------|---------------------------------------------|---------------------------------|----------------------------|-----------------------------|-----------------|---------|-------------|-----------------------------------------------------------------------------------------------------------|
| 1    | 17.30 | 88.0    | 7   | 7/25             | K297k          | (R)ALTVP <del>ELT</del> QQVFD&NMMMAACDPR(H) | 2706.3048                       | 114.0680                   | 8.9                         | 49671.1/4.78    | HUMAN   | P07437      | Tubulin beta chain OS=Homo sapiens GN=TUBB PE=1 SV=2                                                      |
| 2    | 8.35  | 69.0    | 3   | 14/25            | None           | (R)EREALAWAQREGQGPAVTEGSPGIPR(C)            | 2820.4023                       | -0.0295                    | -10.5                       | 127495.3/6.67   | HUMAN   | O43593      | Protein hairless OS=Homo sapiens GN=HR PE=1 SV=5                                                          |
| 3    | 5.61  | 69.3    | 2   | 16/25            | None           | (R)SCKVQESVDWLWVSGDEYEGALLLPR(S)            | 2820.4237                       | -0.0508                    | -18.0                       | 35618.2/8.29    | HUMAN   | RQ8BYB4     | REVERSE Guanine nucleotide-binding protein subunit beta-like protein 1 OS=Homo sapiens GN=GNB1L PE=1 SV=2 |
| 4    | 5.31  | 61.3    | 2   | 16/25            | M286m M292m    | (K)GRQAENEHIHmDNLAQmPMISIPR(V)              | 2788.3440                       | 32.0289                    | 13.8                        | 35427.6/6.58    | HUMAN   | Q322L2      | Lipid phosphate phosphatase-related protein type 5 OS=Homo sapiens GN=LPPR5 PE=2 SV=2                     |
| 5    | 4.76  | 59.9    | 2   | 17/25            | M286m M294m    | (K)GRQAENEHIHmDNLAQmPMISIPR(V)              | 2788.3440                       | 32.0289                    | 13.8                        | 35427.6/6.58    | HUMAN   | Q322L2      | Lipid phosphate phosphatase-related protein type 5 OS=Homo sapiens GN=LPPR5 PE=2 SV=2                     |

Detailed Results

| Rank | Score | SPI (%) | BCS | # Unmatched Ions | Variable sites | Sequence                                                 | MH <sup>+</sup> Calculated (Da) | MH <sup>+</sup> Error (Da) | MH <sup>+</sup> Error (ppm) | Protein MW (Da) | Species | Accession # | MS-Digest Index # | Protein Name                                         |
|------|-------|---------|-----|------------------|----------------|----------------------------------------------------------|---------------------------------|----------------------------|-----------------------------|-----------------|---------|-------------|-------------------|------------------------------------------------------|
| 1    | 17.30 | 88.0    | 7   | 7/25             | K297k          | (R)A.L.I.T.V.P.E.L.T.Q.Q.V.F.D.A.K.N.M.M.A.A.C.D.P.R.(H) | 2706.3048                       | 114.0680                   | 8.9                         | 49671.1/4.78    | HUMAN   | P07437      | 770563            | Tubulin beta chain OS=Homo sapiens GN=TUBB PE=1 SV=2 |

  

| Fragment-ion (m/z)      | 167.135 | 173.130 | 185.127 | 227.105 | 268.165 | 272.173 | 273.179 | 286.176 | 339.240 | 357.241 | 367.233 | 385.249 | 618.259 | 689.292 | 690.326 <sup>+2</sup> | 796.438 | 812.731 <sup>+3</sup> | 820.323 | 845.749 <sup>+3</sup> | 847.992 | 1048.477 <sup>+2</sup> | 1210.036 <sup>+2</sup> | 1218.564 <sup>+2</sup> | 1268.102 <sup>+2</sup> | 1318.622 <sup>+2</sup> |
|-------------------------|---------|---------|---------|---------|---------|---------|---------|---------|---------|---------|---------|---------|---------|---------|-----------------------|---------|-----------------------|---------|-----------------------|---------|------------------------|------------------------|------------------------|------------------------|------------------------|
| Frac. Inten. (% of TIC) | 3.11    | 1.32    | 3.32    | 1.03    | 7.51    | 14.65   | 1.08    | 4.61    | 3.62    | 1.21    | 6.87    | 1.61    | 1.26    | 2.73    | 1.61                  | 1.38    | 5.76                  | 1.65    | 1.05                  | 1.39    | 1.61                   | 1.74                   | 26.97                  | 1.62                   | 1.29                   |
| Rel. Inten. (% of BP)   | 11.53   | 4.89    | 12.32   | 3.82    | 27.85   | 54.33   | 4.01    | 17.09   | 13.43   | 4.47    | 25.49   | 5.99    | 4.66    | 10.12   | 5.97                  | 5.13    | 21.35                 | 6.12    | 3.89                  | 5.15    | 5.97                   | 6.46                   | 100.00                 | 6.00                   | 4.78                   |
| Score                   | 0.50    | -0.05   | 0.50    | 0.75    | 0.25    | 1.50    | -0.04   | 0.50    | -0.13   | 0.50    | 0.25    | 0.50    | 1.50    | 1.50    | 1.50                  | -0.06   | 1.50                  | 1.50    | 1.50                  | -0.05   | -0.06                  | 0.50                   | 1.50                   | 1.50                   | 1.50                   |
| Ion-type                | b2      | b2      | PE      | b3      | b3+H2O  | y2      | b3      | b3      | a4      | b4-H2O  | b4      | y5      | y6      | y6      | y6                    | y6      | y20 <sup>+3</sup>     | y7      | y7                    | y7      | y20-NH <sup>+2</sup>   | y20-NH <sup>+2</sup>   | y20-NH <sup>+2</sup>   | y20-NH <sup>+2</sup>   | y22 <sup>+2</sup>      |
| Delta ppm               | 4.9     |         | -12.7   | 4.3     | -4.7    | 4.4     |         | -3.3    |         | -25.8   | -4.3    | 8.5     | -12.3   | -16.4   |                       |         | 27.3                  | -25.9   | 20.7                  |         |                        | -8.3                   | 4.4                    | 6.8                    | 4.1                    |

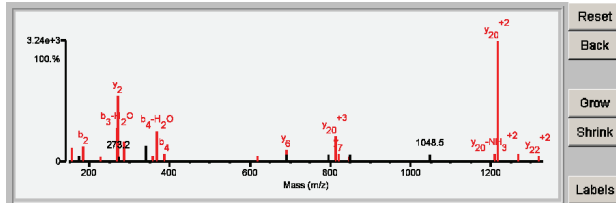

Reset

Back

Grow

Shrink

Labels

Result Summary

| Rank | Score | SPI (%) | BCS | # Unmatched Ions | Variable sites | Sequence                              | MH <sup>+</sup> Calculated (Da) | MH <sup>+</sup> Error (Da) | MH <sup>+</sup> Error (ppm) | Protein MW/pl (Da) | Species | Accession # | Protein Name                                         |
|------|-------|---------|-----|------------------|----------------|---------------------------------------|---------------------------------|----------------------------|-----------------------------|--------------------|---------|-------------|------------------------------------------------------|
| 1    | 24.42 | 93.1    | 12  | 3/25             | K58k           | (R)I/S V Y X N E A T G G K Y V P R(A) | 1816.9228                       | 114.0502                   | 3.8                         | 49671.1/4.78       | HUMAN   | P07437      | Tubulin beta chain OS=Homo sapiens GN=TUBB PE=1 SV=2 |

Detailed Results

| Rank                                                                                                                                                                                                                                                                                                                                                                                                                                                                                                                                                                                                                                                                                                                                                                                                                                                                                                                                                                                                                                                                                                                                                                                                                                                                                                                                                                                                                                                                                                                                                                                                                                                                                                                                                                                                                                                                                                                                                                                                                                                                                                                                                                                                                                                                                                                                                                                                                                                                                                                                                                                                                                                                                                                                                                                                                                                                                                                                                                                                                                                                                                                                                                                                                                            | Score  | SPI (%) | BCS     | # Unmatched Ions | Variable sites | Sequence                              | MH <sup>+</sup> Calculated (Da) | MH <sup>+</sup> Error (Da) | MH <sup>+</sup> Error (ppm) | Protein MW/pl (Da) | Species | Accession # | MS-Digest Index # | Protein Name                                         |                       |                       |                       |                       |         |                       |         |                       |         |          |          |         |         |         |         |                       |                       |                       |                       |         |                       |         |                       |         |          |          |                        |      |       |      |      |      |      |      |      |      |      |      |      |      |      |      |      |      |      |      |      |      |      |      |      |      |                      |      |        |      |       |       |       |      |       |      |       |       |      |       |       |       |      |       |       |       |       |       |       |       |       |       |       |      |      |      |       |      |      |       |      |      |      |       |      |      |      |      |      |      |      |      |      |      |      |      |      |      |          |   |    |   |  |    |    |  |    |    |        |     |    |    |    |                   |                       |                   |                   |    |                   |    |                   |    |    |     |           |      |       |       |  |       |      |  |      |      |       |      |      |      |  |     |     |     |       |     |      |     |      |     |      |      |  |  |    |  |  |  |  |  |  |  |  |  |  |  |  |  |  |  |  |  |  |  |  |  |  |  |  |  |      |  |  |  |  |  |  |  |  |  |  |  |  |  |  |  |  |  |  |  |  |  |  |  |
|-------------------------------------------------------------------------------------------------------------------------------------------------------------------------------------------------------------------------------------------------------------------------------------------------------------------------------------------------------------------------------------------------------------------------------------------------------------------------------------------------------------------------------------------------------------------------------------------------------------------------------------------------------------------------------------------------------------------------------------------------------------------------------------------------------------------------------------------------------------------------------------------------------------------------------------------------------------------------------------------------------------------------------------------------------------------------------------------------------------------------------------------------------------------------------------------------------------------------------------------------------------------------------------------------------------------------------------------------------------------------------------------------------------------------------------------------------------------------------------------------------------------------------------------------------------------------------------------------------------------------------------------------------------------------------------------------------------------------------------------------------------------------------------------------------------------------------------------------------------------------------------------------------------------------------------------------------------------------------------------------------------------------------------------------------------------------------------------------------------------------------------------------------------------------------------------------------------------------------------------------------------------------------------------------------------------------------------------------------------------------------------------------------------------------------------------------------------------------------------------------------------------------------------------------------------------------------------------------------------------------------------------------------------------------------------------------------------------------------------------------------------------------------------------------------------------------------------------------------------------------------------------------------------------------------------------------------------------------------------------------------------------------------------------------------------------------------------------------------------------------------------------------------------------------------------------------------------------------------------------------|--------|---------|---------|------------------|----------------|---------------------------------------|---------------------------------|----------------------------|-----------------------------|--------------------|---------|-------------|-------------------|------------------------------------------------------|-----------------------|-----------------------|-----------------------|-----------------------|---------|-----------------------|---------|-----------------------|---------|----------|----------|---------|---------|---------|---------|-----------------------|-----------------------|-----------------------|-----------------------|---------|-----------------------|---------|-----------------------|---------|----------|----------|------------------------|------|-------|------|------|------|------|------|------|------|------|------|------|------|------|------|------|------|------|------|------|------|------|------|------|------|----------------------|------|--------|------|-------|-------|-------|------|-------|------|-------|-------|------|-------|-------|-------|------|-------|-------|-------|-------|-------|-------|-------|-------|-------|-------|------|------|------|-------|------|------|-------|------|------|------|-------|------|------|------|------|------|------|------|------|------|------|------|------|------|------|----------|---|----|---|--|----|----|--|----|----|--------|-----|----|----|----|-------------------|-----------------------|-------------------|-------------------|----|-------------------|----|-------------------|----|----|-----|-----------|------|-------|-------|--|-------|------|--|------|------|-------|------|------|------|--|-----|-----|-----|-------|-----|------|-----|------|-----|------|------|--|--|----|--|--|--|--|--|--|--|--|--|--|--|--|--|--|--|--|--|--|--|--|--|--|--|--|--|------|--|--|--|--|--|--|--|--|--|--|--|--|--|--|--|--|--|--|--|--|--|--|--|
| 1                                                                                                                                                                                                                                                                                                                                                                                                                                                                                                                                                                                                                                                                                                                                                                                                                                                                                                                                                                                                                                                                                                                                                                                                                                                                                                                                                                                                                                                                                                                                                                                                                                                                                                                                                                                                                                                                                                                                                                                                                                                                                                                                                                                                                                                                                                                                                                                                                                                                                                                                                                                                                                                                                                                                                                                                                                                                                                                                                                                                                                                                                                                                                                                                                                               | 24.42  | 93.1    | 12      | 3/25             | K58k           | (R)I/S V Y X N E A T G G K Y V P R(A) | 1816.9228                       | 114.0502                   | 3.8                         | 49671.1/4.78       | HUMAN   | P07437      | 770563            | Tubulin beta chain OS=Homo sapiens GN=TUBB PE=1 SV=2 |                       |                       |                       |                       |         |                       |         |                       |         |          |          |         |         |         |         |                       |                       |                       |                       |         |                       |         |                       |         |          |          |                        |      |       |      |      |      |      |      |      |      |      |      |      |      |      |      |      |      |      |      |      |      |      |      |      |      |                      |      |        |      |       |       |       |      |       |      |       |       |      |       |       |       |      |       |       |       |       |       |       |       |       |       |       |      |      |      |       |      |      |       |      |      |      |       |      |      |      |      |      |      |      |      |      |      |      |      |      |      |          |   |    |   |  |    |    |  |    |    |        |     |    |    |    |                   |                       |                   |                   |    |                   |    |                   |    |    |     |           |      |       |       |  |       |      |  |      |      |       |      |      |      |  |     |     |     |       |     |      |     |      |     |      |      |  |  |    |  |  |  |  |  |  |  |  |  |  |  |  |  |  |  |  |  |  |  |  |  |  |  |  |  |      |  |  |  |  |  |  |  |  |  |  |  |  |  |  |  |  |  |  |  |  |  |  |  |
| <table border="1"> <thead> <tr> <th>Fragment-ion (m/z)</th> <th>72.081</th> <th>86.096</th> <th>136.074</th> <th>159.111</th> <th>173.127</th> <th>201.123</th> <th>235.147</th> <th>272.170</th> <th>278.112</th> <th>282.179</th> <th>299.139</th> <th>350.172</th> <th>371.238</th> <th>534.303</th> <th>653.336<sup>+2</sup></th> <th>725.864<sup>+2</sup></th> <th>734.864<sup>+2</sup></th> <th>816.391<sup>+2</sup></th> <th>833.465</th> <th>865.939<sup>+2</sup></th> <th>890.486</th> <th>909.456<sup>+2</sup></th> <th>991.533</th> <th>1062.568</th> <th>1305.654</th> </tr> </thead> <tbody> <tr> <td>Frac. Inten.(% of TIC)</td> <td>0.33</td> <td>20.58</td> <td>0.31</td> <td>2.26</td> <td>3.86</td> <td>4.45</td> <td>1.98</td> <td>8.53</td> <td>1.73</td> <td>4.23</td> <td>2.61</td> <td>1.60</td> <td>2.19</td> <td>2.93</td> <td>3.55</td> <td>1.57</td> <td>5.14</td> <td>5.93</td> <td>2.16</td> <td>3.35</td> <td>5.72</td> <td>3.33</td> <td>5.60</td> <td>3.94</td> <td>2.11</td> </tr> <tr> <td>Rel. Inten.(% of BP)</td> <td>1.60</td> <td>100.00</td> <td>1.52</td> <td>10.96</td> <td>18.78</td> <td>21.64</td> <td>9.64</td> <td>41.44</td> <td>8.38</td> <td>20.53</td> <td>12.69</td> <td>7.78</td> <td>10.66</td> <td>14.24</td> <td>17.25</td> <td>7.61</td> <td>25.00</td> <td>28.83</td> <td>10.47</td> <td>16.26</td> <td>27.78</td> <td>16.18</td> <td>27.22</td> <td>19.16</td> <td>10.24</td> </tr> <tr> <td>Score</td> <td>0.50</td> <td>0.50</td> <td>1.00</td> <td>-0.11</td> <td>0.50</td> <td>0.50</td> <td>-0.10</td> <td>1.50</td> <td>0.75</td> <td>0.25</td> <td>-0.13</td> <td>0.75</td> <td>1.50</td> <td>1.50</td> <td>1.50</td> <td>0.50</td> <td>1.50</td> <td>1.50</td> <td>1.50</td> <td>1.50</td> <td>1.50</td> <td>1.50</td> <td>1.50</td> <td>1.50</td> <td>1.50</td> </tr> <tr> <td>Ion-type</td> <td>V</td> <td>a1</td> <td>Y</td> <td></td> <td>a2</td> <td>b2</td> <td></td> <td>y2</td> <td>YN</td> <td>b3-H2O</td> <td>SVY</td> <td>y3</td> <td>y4</td> <td>y4</td> <td>y11<sup>+2</sup></td> <td>y12-H2O<sup>+2</sup></td> <td>y12<sup>+2</sup></td> <td>a14<sup>+2</sup></td> <td>y6</td> <td>y14<sup>+2</sup></td> <td>y7</td> <td>y15<sup>+2</sup></td> <td>y8</td> <td>y9</td> <td>y11</td> </tr> <tr> <td>Delta ppm</td> <td>-1.0</td> <td>-21.2</td> <td>-13.9</td> <td></td> <td>-14.2</td> <td>-7.3</td> <td></td> <td>-5.6</td> <td>-9.5</td> <td>-12.1</td> <td>-0.4</td> <td>-5.2</td> <td>-1.4</td> <td></td> <td>7.6</td> <td>9.2</td> <td>1.8</td> <td>-20.1</td> <td>3.1</td> <td>11.8</td> <td>2.5</td> <td>12.8</td> <td>1.5</td> <td>-1.3</td> <td>-0.8</td> </tr> <tr> <td></td> <td></td> <td>LI</td> <td></td> </tr> <tr> <td></td> <td></td> <td>-8.4</td> <td></td> </tr> </tbody> </table> |        |         |         |                  |                |                                       |                                 |                            |                             |                    |         |             |                   |                                                      | Fragment-ion (m/z)    | 72.081                | 86.096                | 136.074               | 159.111 | 173.127               | 201.123 | 235.147               | 272.170 | 278.112  | 282.179  | 299.139 | 350.172 | 371.238 | 534.303 | 653.336 <sup>+2</sup> | 725.864 <sup>+2</sup> | 734.864 <sup>+2</sup> | 816.391 <sup>+2</sup> | 833.465 | 865.939 <sup>+2</sup> | 890.486 | 909.456 <sup>+2</sup> | 991.533 | 1062.568 | 1305.654 | Frac. Inten.(% of TIC) | 0.33 | 20.58 | 0.31 | 2.26 | 3.86 | 4.45 | 1.98 | 8.53 | 1.73 | 4.23 | 2.61 | 1.60 | 2.19 | 2.93 | 3.55 | 1.57 | 5.14 | 5.93 | 2.16 | 3.35 | 5.72 | 3.33 | 5.60 | 3.94 | 2.11 | Rel. Inten.(% of BP) | 1.60 | 100.00 | 1.52 | 10.96 | 18.78 | 21.64 | 9.64 | 41.44 | 8.38 | 20.53 | 12.69 | 7.78 | 10.66 | 14.24 | 17.25 | 7.61 | 25.00 | 28.83 | 10.47 | 16.26 | 27.78 | 16.18 | 27.22 | 19.16 | 10.24 | Score | 0.50 | 0.50 | 1.00 | -0.11 | 0.50 | 0.50 | -0.10 | 1.50 | 0.75 | 0.25 | -0.13 | 0.75 | 1.50 | 1.50 | 1.50 | 0.50 | 1.50 | 1.50 | 1.50 | 1.50 | 1.50 | 1.50 | 1.50 | 1.50 | 1.50 | Ion-type | V | a1 | Y |  | a2 | b2 |  | y2 | YN | b3-H2O | SVY | y3 | y4 | y4 | y11 <sup>+2</sup> | y12-H2O <sup>+2</sup> | y12 <sup>+2</sup> | a14 <sup>+2</sup> | y6 | y14 <sup>+2</sup> | y7 | y15 <sup>+2</sup> | y8 | y9 | y11 | Delta ppm | -1.0 | -21.2 | -13.9 |  | -14.2 | -7.3 |  | -5.6 | -9.5 | -12.1 | -0.4 | -5.2 | -1.4 |  | 7.6 | 9.2 | 1.8 | -20.1 | 3.1 | 11.8 | 2.5 | 12.8 | 1.5 | -1.3 | -0.8 |  |  | LI |  |  |  |  |  |  |  |  |  |  |  |  |  |  |  |  |  |  |  |  |  |  |  |  |  | -8.4 |  |  |  |  |  |  |  |  |  |  |  |  |  |  |  |  |  |  |  |  |  |  |  |
| Fragment-ion (m/z)                                                                                                                                                                                                                                                                                                                                                                                                                                                                                                                                                                                                                                                                                                                                                                                                                                                                                                                                                                                                                                                                                                                                                                                                                                                                                                                                                                                                                                                                                                                                                                                                                                                                                                                                                                                                                                                                                                                                                                                                                                                                                                                                                                                                                                                                                                                                                                                                                                                                                                                                                                                                                                                                                                                                                                                                                                                                                                                                                                                                                                                                                                                                                                                                                              | 72.081 | 86.096  | 136.074 | 159.111          | 173.127        | 201.123                               | 235.147                         | 272.170                    | 278.112                     | 282.179            | 299.139 | 350.172     | 371.238           | 534.303                                              | 653.336 <sup>+2</sup> | 725.864 <sup>+2</sup> | 734.864 <sup>+2</sup> | 816.391 <sup>+2</sup> | 833.465 | 865.939 <sup>+2</sup> | 890.486 | 909.456 <sup>+2</sup> | 991.533 | 1062.568 | 1305.654 |         |         |         |         |                       |                       |                       |                       |         |                       |         |                       |         |          |          |                        |      |       |      |      |      |      |      |      |      |      |      |      |      |      |      |      |      |      |      |      |      |      |      |      |      |                      |      |        |      |       |       |       |      |       |      |       |       |      |       |       |       |      |       |       |       |       |       |       |       |       |       |       |      |      |      |       |      |      |       |      |      |      |       |      |      |      |      |      |      |      |      |      |      |      |      |      |      |          |   |    |   |  |    |    |  |    |    |        |     |    |    |    |                   |                       |                   |                   |    |                   |    |                   |    |    |     |           |      |       |       |  |       |      |  |      |      |       |      |      |      |  |     |     |     |       |     |      |     |      |     |      |      |  |  |    |  |  |  |  |  |  |  |  |  |  |  |  |  |  |  |  |  |  |  |  |  |  |  |  |  |      |  |  |  |  |  |  |  |  |  |  |  |  |  |  |  |  |  |  |  |  |  |  |  |
| Frac. Inten.(% of TIC)                                                                                                                                                                                                                                                                                                                                                                                                                                                                                                                                                                                                                                                                                                                                                                                                                                                                                                                                                                                                                                                                                                                                                                                                                                                                                                                                                                                                                                                                                                                                                                                                                                                                                                                                                                                                                                                                                                                                                                                                                                                                                                                                                                                                                                                                                                                                                                                                                                                                                                                                                                                                                                                                                                                                                                                                                                                                                                                                                                                                                                                                                                                                                                                                                          | 0.33   | 20.58   | 0.31    | 2.26             | 3.86           | 4.45                                  | 1.98                            | 8.53                       | 1.73                        | 4.23               | 2.61    | 1.60        | 2.19              | 2.93                                                 | 3.55                  | 1.57                  | 5.14                  | 5.93                  | 2.16    | 3.35                  | 5.72    | 3.33                  | 5.60    | 3.94     | 2.11     |         |         |         |         |                       |                       |                       |                       |         |                       |         |                       |         |          |          |                        |      |       |      |      |      |      |      |      |      |      |      |      |      |      |      |      |      |      |      |      |      |      |      |      |      |                      |      |        |      |       |       |       |      |       |      |       |       |      |       |       |       |      |       |       |       |       |       |       |       |       |       |       |      |      |      |       |      |      |       |      |      |      |       |      |      |      |      |      |      |      |      |      |      |      |      |      |      |          |   |    |   |  |    |    |  |    |    |        |     |    |    |    |                   |                       |                   |                   |    |                   |    |                   |    |    |     |           |      |       |       |  |       |      |  |      |      |       |      |      |      |  |     |     |     |       |     |      |     |      |     |      |      |  |  |    |  |  |  |  |  |  |  |  |  |  |  |  |  |  |  |  |  |  |  |  |  |  |  |  |  |      |  |  |  |  |  |  |  |  |  |  |  |  |  |  |  |  |  |  |  |  |  |  |  |
| Rel. Inten.(% of BP)                                                                                                                                                                                                                                                                                                                                                                                                                                                                                                                                                                                                                                                                                                                                                                                                                                                                                                                                                                                                                                                                                                                                                                                                                                                                                                                                                                                                                                                                                                                                                                                                                                                                                                                                                                                                                                                                                                                                                                                                                                                                                                                                                                                                                                                                                                                                                                                                                                                                                                                                                                                                                                                                                                                                                                                                                                                                                                                                                                                                                                                                                                                                                                                                                            | 1.60   | 100.00  | 1.52    | 10.96            | 18.78          | 21.64                                 | 9.64                            | 41.44                      | 8.38                        | 20.53              | 12.69   | 7.78        | 10.66             | 14.24                                                | 17.25                 | 7.61                  | 25.00                 | 28.83                 | 10.47   | 16.26                 | 27.78   | 16.18                 | 27.22   | 19.16    | 10.24    |         |         |         |         |                       |                       |                       |                       |         |                       |         |                       |         |          |          |                        |      |       |      |      |      |      |      |      |      |      |      |      |      |      |      |      |      |      |      |      |      |      |      |      |      |                      |      |        |      |       |       |       |      |       |      |       |       |      |       |       |       |      |       |       |       |       |       |       |       |       |       |       |      |      |      |       |      |      |       |      |      |      |       |      |      |      |      |      |      |      |      |      |      |      |      |      |      |          |   |    |   |  |    |    |  |    |    |        |     |    |    |    |                   |                       |                   |                   |    |                   |    |                   |    |    |     |           |      |       |       |  |       |      |  |      |      |       |      |      |      |  |     |     |     |       |     |      |     |      |     |      |      |  |  |    |  |  |  |  |  |  |  |  |  |  |  |  |  |  |  |  |  |  |  |  |  |  |  |  |  |      |  |  |  |  |  |  |  |  |  |  |  |  |  |  |  |  |  |  |  |  |  |  |  |
| Score                                                                                                                                                                                                                                                                                                                                                                                                                                                                                                                                                                                                                                                                                                                                                                                                                                                                                                                                                                                                                                                                                                                                                                                                                                                                                                                                                                                                                                                                                                                                                                                                                                                                                                                                                                                                                                                                                                                                                                                                                                                                                                                                                                                                                                                                                                                                                                                                                                                                                                                                                                                                                                                                                                                                                                                                                                                                                                                                                                                                                                                                                                                                                                                                                                           | 0.50   | 0.50    | 1.00    | -0.11            | 0.50           | 0.50                                  | -0.10                           | 1.50                       | 0.75                        | 0.25               | -0.13   | 0.75        | 1.50              | 1.50                                                 | 1.50                  | 0.50                  | 1.50                  | 1.50                  | 1.50    | 1.50                  | 1.50    | 1.50                  | 1.50    | 1.50     | 1.50     |         |         |         |         |                       |                       |                       |                       |         |                       |         |                       |         |          |          |                        |      |       |      |      |      |      |      |      |      |      |      |      |      |      |      |      |      |      |      |      |      |      |      |      |      |                      |      |        |      |       |       |       |      |       |      |       |       |      |       |       |       |      |       |       |       |       |       |       |       |       |       |       |      |      |      |       |      |      |       |      |      |      |       |      |      |      |      |      |      |      |      |      |      |      |      |      |      |          |   |    |   |  |    |    |  |    |    |        |     |    |    |    |                   |                       |                   |                   |    |                   |    |                   |    |    |     |           |      |       |       |  |       |      |  |      |      |       |      |      |      |  |     |     |     |       |     |      |     |      |     |      |      |  |  |    |  |  |  |  |  |  |  |  |  |  |  |  |  |  |  |  |  |  |  |  |  |  |  |  |  |      |  |  |  |  |  |  |  |  |  |  |  |  |  |  |  |  |  |  |  |  |  |  |  |
| Ion-type                                                                                                                                                                                                                                                                                                                                                                                                                                                                                                                                                                                                                                                                                                                                                                                                                                                                                                                                                                                                                                                                                                                                                                                                                                                                                                                                                                                                                                                                                                                                                                                                                                                                                                                                                                                                                                                                                                                                                                                                                                                                                                                                                                                                                                                                                                                                                                                                                                                                                                                                                                                                                                                                                                                                                                                                                                                                                                                                                                                                                                                                                                                                                                                                                                        | V      | a1      | Y       |                  | a2             | b2                                    |                                 | y2                         | YN                          | b3-H2O             | SVY     | y3          | y4                | y4                                                   | y11 <sup>+2</sup>     | y12-H2O <sup>+2</sup> | y12 <sup>+2</sup>     | a14 <sup>+2</sup>     | y6      | y14 <sup>+2</sup>     | y7      | y15 <sup>+2</sup>     | y8      | y9       | y11      |         |         |         |         |                       |                       |                       |                       |         |                       |         |                       |         |          |          |                        |      |       |      |      |      |      |      |      |      |      |      |      |      |      |      |      |      |      |      |      |      |      |      |      |      |                      |      |        |      |       |       |       |      |       |      |       |       |      |       |       |       |      |       |       |       |       |       |       |       |       |       |       |      |      |      |       |      |      |       |      |      |      |       |      |      |      |      |      |      |      |      |      |      |      |      |      |      |          |   |    |   |  |    |    |  |    |    |        |     |    |    |    |                   |                       |                   |                   |    |                   |    |                   |    |    |     |           |      |       |       |  |       |      |  |      |      |       |      |      |      |  |     |     |     |       |     |      |     |      |     |      |      |  |  |    |  |  |  |  |  |  |  |  |  |  |  |  |  |  |  |  |  |  |  |  |  |  |  |  |  |      |  |  |  |  |  |  |  |  |  |  |  |  |  |  |  |  |  |  |  |  |  |  |  |
| Delta ppm                                                                                                                                                                                                                                                                                                                                                                                                                                                                                                                                                                                                                                                                                                                                                                                                                                                                                                                                                                                                                                                                                                                                                                                                                                                                                                                                                                                                                                                                                                                                                                                                                                                                                                                                                                                                                                                                                                                                                                                                                                                                                                                                                                                                                                                                                                                                                                                                                                                                                                                                                                                                                                                                                                                                                                                                                                                                                                                                                                                                                                                                                                                                                                                                                                       | -1.0   | -21.2   | -13.9   |                  | -14.2          | -7.3                                  |                                 | -5.6                       | -9.5                        | -12.1              | -0.4    | -5.2        | -1.4              |                                                      | 7.6                   | 9.2                   | 1.8                   | -20.1                 | 3.1     | 11.8                  | 2.5     | 12.8                  | 1.5     | -1.3     | -0.8     |         |         |         |         |                       |                       |                       |                       |         |                       |         |                       |         |          |          |                        |      |       |      |      |      |      |      |      |      |      |      |      |      |      |      |      |      |      |      |      |      |      |      |      |      |                      |      |        |      |       |       |       |      |       |      |       |       |      |       |       |       |      |       |       |       |       |       |       |       |       |       |       |      |      |      |       |      |      |       |      |      |      |       |      |      |      |      |      |      |      |      |      |      |      |      |      |      |          |   |    |   |  |    |    |  |    |    |        |     |    |    |    |                   |                       |                   |                   |    |                   |    |                   |    |    |     |           |      |       |       |  |       |      |  |      |      |       |      |      |      |  |     |     |     |       |     |      |     |      |     |      |      |  |  |    |  |  |  |  |  |  |  |  |  |  |  |  |  |  |  |  |  |  |  |  |  |  |  |  |  |      |  |  |  |  |  |  |  |  |  |  |  |  |  |  |  |  |  |  |  |  |  |  |  |
|                                                                                                                                                                                                                                                                                                                                                                                                                                                                                                                                                                                                                                                                                                                                                                                                                                                                                                                                                                                                                                                                                                                                                                                                                                                                                                                                                                                                                                                                                                                                                                                                                                                                                                                                                                                                                                                                                                                                                                                                                                                                                                                                                                                                                                                                                                                                                                                                                                                                                                                                                                                                                                                                                                                                                                                                                                                                                                                                                                                                                                                                                                                                                                                                                                                 |        | LI      |         |                  |                |                                       |                                 |                            |                             |                    |         |             |                   |                                                      |                       |                       |                       |                       |         |                       |         |                       |         |          |          |         |         |         |         |                       |                       |                       |                       |         |                       |         |                       |         |          |          |                        |      |       |      |      |      |      |      |      |      |      |      |      |      |      |      |      |      |      |      |      |      |      |      |      |      |                      |      |        |      |       |       |       |      |       |      |       |       |      |       |       |       |      |       |       |       |       |       |       |       |       |       |       |      |      |      |       |      |      |       |      |      |      |       |      |      |      |      |      |      |      |      |      |      |      |      |      |      |          |   |    |   |  |    |    |  |    |    |        |     |    |    |    |                   |                       |                   |                   |    |                   |    |                   |    |    |     |           |      |       |       |  |       |      |  |      |      |       |      |      |      |  |     |     |     |       |     |      |     |      |     |      |      |  |  |    |  |  |  |  |  |  |  |  |  |  |  |  |  |  |  |  |  |  |  |  |  |  |  |  |  |      |  |  |  |  |  |  |  |  |  |  |  |  |  |  |  |  |  |  |  |  |  |  |  |
|                                                                                                                                                                                                                                                                                                                                                                                                                                                                                                                                                                                                                                                                                                                                                                                                                                                                                                                                                                                                                                                                                                                                                                                                                                                                                                                                                                                                                                                                                                                                                                                                                                                                                                                                                                                                                                                                                                                                                                                                                                                                                                                                                                                                                                                                                                                                                                                                                                                                                                                                                                                                                                                                                                                                                                                                                                                                                                                                                                                                                                                                                                                                                                                                                                                 |        | -8.4    |         |                  |                |                                       |                                 |                            |                             |                    |         |             |                   |                                                      |                       |                       |                       |                       |         |                       |         |                       |         |          |          |         |         |         |         |                       |                       |                       |                       |         |                       |         |                       |         |          |          |                        |      |       |      |      |      |      |      |      |      |      |      |      |      |      |      |      |      |      |      |      |      |      |      |      |      |                      |      |        |      |       |       |       |      |       |      |       |       |      |       |       |       |      |       |       |       |       |       |       |       |       |       |       |      |      |      |       |      |      |       |      |      |      |       |      |      |      |      |      |      |      |      |      |      |      |      |      |      |          |   |    |   |  |    |    |  |    |    |        |     |    |    |    |                   |                       |                   |                   |    |                   |    |                   |    |    |     |           |      |       |       |  |       |      |  |      |      |       |      |      |      |  |     |     |     |       |     |      |     |      |     |      |      |  |  |    |  |  |  |  |  |  |  |  |  |  |  |  |  |  |  |  |  |  |  |  |  |  |  |  |  |      |  |  |  |  |  |  |  |  |  |  |  |  |  |  |  |  |  |  |  |  |  |  |  |

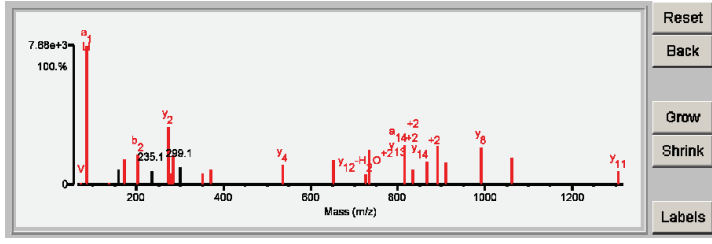

Result Summary

| Rank | Score | SPI (%) | BCS | # Unmatched Ions | Variable sites | Sequence          | MH <sup>+</sup> Calculated (Da) | MH <sup>+</sup> Error (Da) | MH <sup>+</sup> Error (ppm) | Protein MW/pl (Da) | Species | Accession # | Protein Name                                                                       |
|------|-------|---------|-----|------------------|----------------|-------------------|---------------------------------|----------------------------|-----------------------------|--------------------|---------|-------------|------------------------------------------------------------------------------------|
| 1    | 9.61  | 60.6    | 6   | 9/23             | K252k          | (R)kLAVNMVFPFR(L) | 1271.7293                       | 114.0511                   | 5.9                         | 50327.2/5.06       | HUMAN   | Q9H4B7      | Tubulin beta-1 chain OS=Homo sapiens GN=TUBB1 PE=1 SV=1                            |
| 1    | 9.61  | 60.6    | 6   | 9/23             | K252k          | (R)kLAVNMVFPFR(L) | 1271.7293                       | 114.0511                   | 5.9                         | 49907.3/4.78       | HUMAN   | Q13885      | Tubulin beta-2A chain OS=Homo sapiens GN=TUBB2A PE=1 SV=1                          |
| 1    | 9.61  | 60.6    | 6   | 9/23             | K252k          | (R)kLAVNMVFPFR(L) | 1271.7293                       | 114.0511                   | 5.9                         | 49953.4/4.78       | HUMAN   | Q9BVA1      | Tubulin beta-2B chain OS=Homo sapiens GN=TUBB2B PE=1 SV=1                          |
| 1    | 9.61  | 60.6    | 6   | 9/23             | K252k          | (R)kLAVNMVFPFR(L) | 1271.7293                       | 114.0511                   | 5.9                         | 49831.3/4.79       | HUMAN   | P68371      | Tubulin beta-2C chain OS=Homo sapiens GN=TUBB2C PE=1 SV=1                          |
| 1    | 9.61  | 60.6    | 6   | 9/23             | K252k          | (R)kLAVNMVFPFR(L) | 1271.7293                       | 114.0511                   | 5.9                         | 50433.0/4.83       | HUMAN   | Q13509      | Tubulin beta-3 chain OS=Homo sapiens GN=TUBB3 PE=1 SV=2                            |
| 1    | 9.61  | 60.6    | 6   | 9/23             | K252k          | (R)kLAVNMVFPFR(L) | 1271.7293                       | 114.0511                   | 5.9                         | 48434.8/5.11       | HUMAN   | Q99867      | Putative tubulin beta-4q chain OS=Homo sapiens GN=TUBB4Q PE=5 SV=1                 |
| 1    | 9.61  | 60.6    | 6   | 9/23             | K252k          | (R)kLAVNMVFPFR(L) | 1271.7293                       | 114.0511                   | 5.9                         | 49586.1/4.78       | HUMAN   | P04350      | Tubulin beta-4 chain OS=Homo sapiens GN=TUBB4 PE=1 SV=2                            |
| 1    | 9.61  | 60.6    | 6   | 9/23             | K252k          | (R)kLAVNMVFPFR(L) | 1271.7293                       | 114.0511                   | 5.9                         | 49671.1/4.78       | HUMAN   | P07437      | Tubulin beta chain OS=Homo sapiens GN=TUBB PE=1 SV=2                               |
| 1    | 9.61  | 60.6    | 6   | 9/23             | K252k          | (R)kLAVNMVFPFR(L) | 1271.7293                       | 114.0511                   | 5.9                         | 49857.4/4.77       | HUMAN   | Q9BUF5      | Tubulin beta-6 chain OS=Homo sapiens GN=TUBB6 PE=1 SV=1                            |
| 1    | 9.61  | 60.6    | 6   | 9/23             | K252k          | (R)kLAVNMVFPFR(L) | 1271.7293                       | 114.0511                   | 5.9                         | 49572.9/4.75       | HUMAN   | A6NNZ2      | Tubulin beta-8 chain B OS=Homo sapiens PE=3 SV=1                                   |
| 1    | 9.61  | 60.6    | 6   | 9/23             | K252k          | (R)kLAVNMVFPFR(L) | 1271.7293                       | 114.0511                   | 5.9                         | 49776.3/4.79       | HUMAN   | Q3ZCM7      | Tubulin beta-8 chain OS=Homo sapiens GN=TUBB8 PE=1 SV=2                            |
| 1    | 9.61  | 60.6    | 6   | 9/23             | K180k          | (R)kLAVNMVFPFR(L) | 1271.7293                       | 114.0511                   | 5.9                         | 41775.3/4.77       | HUMAN   | A6NKZ8      | Putative tubulin beta chain-like protein ENSP00000290377 OS=Homo sapiens PE=5 SV=2 |

Detailed Results

| Rank | Score | SPI (%) | BCS | # Unmatched Ions | Variable sites | Sequence                      | MH <sup>+</sup> Calculated (Da) | MH <sup>+</sup> Error (Da) | MH <sup>+</sup> Error (ppm) | Protein MW/pl (Da) | Species | Accession # | MS-Digest Index # | Protein Name                                                                       |
|------|-------|---------|-----|------------------|----------------|-------------------------------|---------------------------------|----------------------------|-----------------------------|--------------------|---------|-------------|-------------------|------------------------------------------------------------------------------------|
| 1    | 9.61  | 60.6    | 6   | 9/23             | K252k          | (R) k L A V N M V P F P R (L) | 1271.7293                       | 114.0511                   | 5.9                         | 50327.2/5.06       | HUMAN   | Q9H4B7      | 770371            | Tubulin beta-1 chain OS=Homo sapiens GN=TUBB1 PE=1 SV=1                            |
| 1    | 9.61  | 60.6    | 6   | 9/23             | K252k          | (R) k L A V N M V P F P R (L) | 1271.7293                       | 114.0511                   | 5.9                         | 49907.3/4.78       | HUMAN   | Q13885      | 770405            | Tubulin beta-2A chain OS=Homo sapiens GN=TUBB2A PE=1 SV=1                          |
| 1    | 9.61  | 60.6    | 6   | 9/23             | K252k          | (R) k L A V N M V P F P R (L) | 1271.7293                       | 114.0511                   | 5.9                         | 49953.4/4.78       | HUMAN   | Q9BVA1      | 770415            | Tubulin beta-2B chain OS=Homo sapiens GN=TUBB2B PE=1 SV=1                          |
| 1    | 9.61  | 60.6    | 6   | 9/23             | K252k          | (R) k L A V N M V P F P R (L) | 1271.7293                       | 114.0511                   | 5.9                         | 49831.3/4.79       | HUMAN   | P68371      | 770423            | Tubulin beta-2C chain OS=Homo sapiens GN=TUBB2C PE=1 SV=1                          |
| 1    | 9.61  | 60.6    | 6   | 9/23             | K252k          | (R) k L A V N M V P F P R (L) | 1271.7293                       | 114.0511                   | 5.9                         | 50433.0/4.83       | HUMAN   | Q13509      | 770503            | Tubulin beta-3 chain OS=Homo sapiens GN=TUBB3 PE=1 SV=2                            |
| 1    | 9.61  | 60.6    | 6   | 9/23             | K252k          | (R) k L A V N M V P F P R (L) | 1271.7293                       | 114.0511                   | 5.9                         | 48434.8/5.11       | HUMAN   | Q99867      | 770523            | Putative tubulin beta-4q chain OS=Homo sapiens GN=TUBB4Q PE=5 SV=1                 |
| 1    | 9.61  | 60.6    | 6   | 9/23             | K252k          | (R) k L A V N M V P F P R (L) | 1271.7293                       | 114.0511                   | 5.9                         | 49586.1/4.78       | HUMAN   | P04350      | 770535            | Tubulin beta-4 chain OS=Homo sapiens GN=TUBB4 PE=1 SV=2                            |
| 1    | 9.61  | 60.6    | 6   | 9/23             | K252k          | (R) k L A V N M V P F P R (L) | 1271.7293                       | 114.0511                   | 5.9                         | 49671.1/4.78       | HUMAN   | P07437      | 770563            | Tubulin beta chain OS=Homo sapiens GN=TUBB PE=1 SV=2                               |
| 1    | 9.61  | 60.6    | 6   | 9/23             | K252k          | (R) k L A V N M V P F P R (L) | 1271.7293                       | 114.0511                   | 5.9                         | 49857.4/4.77       | HUMAN   | Q9BUF5      | 770597            | Tubulin beta-6 chain OS=Homo sapiens GN=TUBB6 PE=1 SV=1                            |
| 1    | 9.61  | 60.6    | 6   | 9/23             | K252k          | (R) k L A V N M V P F P R (L) | 1271.7293                       | 114.0511                   | 5.9                         | 49572.9/4.75       | HUMAN   | A6NNZ2      | 770615            | Tubulin beta-8 chain B OS=Homo sapiens PE=3 SV=1                                   |
| 1    | 9.61  | 60.6    | 6   | 9/23             | K252k          | (R) k L A V N M V P F P R (L) | 1271.7293                       | 114.0511                   | 5.9                         | 49776.3/4.79       | HUMAN   | Q3ZCM7      | 770619            | Tubulin beta-8 chain OS=Homo sapiens GN=TUBB8 PE=1 SV=2                            |
| 1    | 9.61  | 60.6    | 6   | 9/23             | K180k          | (R) k L A V N M V P F P R (L) | 1271.7293                       | 114.0511                   | 5.9                         | 41775.3/4.77       | HUMAN   | A6NKZ8      | 913329            | Putative tubulin beta chain-like protein ENSP00000290377 OS=Homo sapiens PE=5 SV=2 |

| Fragment-Ion (m/z)      | 70.066 | 72.082 | 84.081 | 86.091 | 104.051 | 112.088 | 115.098 | 120.082 | 175.119 | 217.133 | 255.140 | 258.650 | 272.168 | 274.119 | 381.223 | 402.221 | 419.238 <sup>+3</sup> | 516.295 | 526.337 | 544.238 | 612.372 | 640.378 | 771.427 |
|-------------------------|--------|--------|--------|--------|---------|---------|---------|---------|---------|---------|---------|---------|---------|---------|---------|---------|-----------------------|---------|---------|---------|---------|---------|---------|
| Frac. Inten. (% of TIC) | 0.00   | 0.92   | 12.70  | 2.41   | 7.33    | 0.07    | 2.18    | 0.16    | 4.51    | 4.32    | 5.54    | 3.06    | 2.17    | 2.35    | 2.92    | 2.23    | 2.53                  | 27.79   | 3.07    | 2.67    | 2.21    | 5.36    | 3.50    |
| Rel. Inten. (% of BP)   | 0.01   | 3.30   | 45.70  | 8.69   | 26.36   | 0.23    | 7.84    | 0.59    | 16.22   | 15.54   | 19.95   | 11.00   | 7.79    | 8.47    | 10.52   | 8.03    | 9.12                  | 100.00  | 11.04   | 9.61    | 7.94    | 19.28   | 12.60   |
| Score                   | 0.20   | 0.50   | -0.46  | -0.09  | -0.26   | 0.33    | -0.08   | 1.00    | 1.50    | -0.16   | 0.50    | 1.50    | 1.50    | -0.08   | -0.11   | 0.50    | -0.09                 | 1.50    | 0.50    | 0.50    | 0.50    | 0.50    | 0.50    |
| Ion-type                | PR     | V      |        |        | R       |         | F       | Y1      | Y2-NH3  | Y++4    | Y2      | Y3-NH3  | Y4      | b4      | a5      | b5      |                       |         |         |         |         |         |         |
| Delta ppm               | 18.2   | 12.8   |        |        | 8.7     |         | 8.5     | -2.0    |         |         | -21.4   | -0.3    | -15.1   |         |         | 19.4    |                       | 4.9     | 2.6     |         | -18.6   | -1.5    | 9.9     |

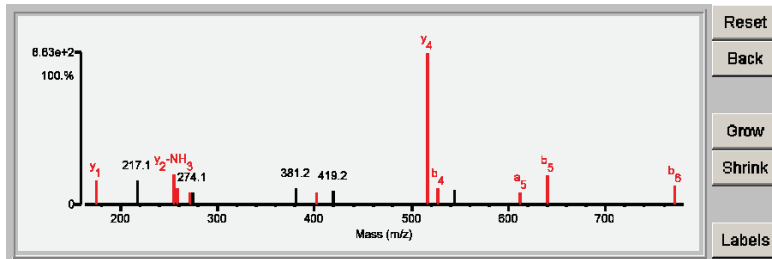

Result Summary

| Rank | Score | SPI (%) | BCS | # Unmatched Ions | Variable sites | Sequence               | MH <sup>+</sup> Calculated (Da) | MH <sup>+</sup> Error (Da) | MH <sup>+</sup> Error (ppm) | Protein MW/Pl (Da) | Species | Accession #            | Protein Name                                              |
|------|-------|---------|-----|------------------|----------------|------------------------|---------------------------------|----------------------------|-----------------------------|--------------------|---------|------------------------|-----------------------------------------------------------|
| 1    | 17.30 | 92.2    | 9   | 3/24             | K324k          | (R)MSMKEVDEQMLNVQNK(N) | 1923.8973                       | 114.0669                   | 11.7                        | 49907.3/4.78       | HUMAN   | <a href="#">Q13885</a> | Tubulin beta-2A chain OS=Homo sapiens GN=TUBB2A PE=1 SV=1 |
| 1    | 17.30 | 92.2    | 9   | 3/24             | K324k          | (R)MSMKEVDEQMLNVQNK(N) | 1923.8973                       | 114.0669                   | 11.7                        | 49953.4/4.78       | HUMAN   | <a href="#">Q9BVA1</a> | Tubulin beta-2B chain OS=Homo sapiens GN=TUBB2B PE=1 SV=1 |
| 1    | 17.30 | 92.2    | 9   | 3/24             | K324k          | (R)MSMKEVDEQMLNVQNK(N) | 1923.8973                       | 114.0669                   | 11.7                        | 49831.3/4.79       | HUMAN   | <a href="#">P68371</a> | Tubulin beta-2C chain OS=Homo sapiens GN=TUBB2C PE=1 SV=1 |
| 1    | 17.30 | 92.2    | 9   | 3/24             | K324k          | (R)MSMKEVDEQMLNVQNK(N) | 1923.8973                       | 114.0669                   | 11.7                        | 49671.1/4.78       | HUMAN   | <a href="#">P07437</a> | Tubulin beta chain OS=Homo sapiens GN=TUBB PE=1 SV=2      |
| 2    | 7.62  | 57.0    | 4   | 10/24            | K336k          | (R)MSMKEVDEQMLNVQNK(N) | 1923.8973                       | 114.0669                   | 11.7                        | 49907.3/4.78       | HUMAN   | <a href="#">Q13885</a> | Tubulin beta-2A chain OS=Homo sapiens GN=TUBB2A PE=1 SV=1 |

Detailed Results

| Rank | Score | SPI (%) | BCS | # Unmatched Ions | Variable sites | Sequence                                       | MH <sup>+</sup> Calculated (Da) | MH <sup>+</sup> Error (Da) | MH <sup>+</sup> Error (ppm) | Protein MW/Pl (Da) | Species | Accession #            | MS-Digest Index #      | Protein Name                                              |
|------|-------|---------|-----|------------------|----------------|------------------------------------------------|---------------------------------|----------------------------|-----------------------------|--------------------|---------|------------------------|------------------------|-----------------------------------------------------------|
| 1    | 17.30 | 92.2    | 9   | 3/24             | K324k          | (R)M/S/M k E V D \ E Q M L N / V / Q / N K (N) | 1923.8973                       | 114.0669                   | 11.7                        | 49907.3/4.78       | HUMAN   | <a href="#">Q13885</a> | <a href="#">770405</a> | Tubulin beta-2A chain OS=Homo sapiens GN=TUBB2A PE=1 SV=1 |
| 1    | 17.30 | 92.2    | 9   | 3/24             | K324k          | (R)M/S/M k E V D \ E Q M L N / V / Q / N K (N) | 1923.8973                       | 114.0669                   | 11.7                        | 49953.4/4.78       | HUMAN   | <a href="#">Q9BVA1</a> | <a href="#">770415</a> | Tubulin beta-2B chain OS=Homo sapiens GN=TUBB2B PE=1 SV=1 |
| 1    | 17.30 | 92.2    | 9   | 3/24             | K324k          | (R)M/S/M k E V D \ E Q M L N / V / Q / N K (N) | 1923.8973                       | 114.0669                   | 11.7                        | 49831.3/4.79       | HUMAN   | <a href="#">P68371</a> | <a href="#">770423</a> | Tubulin beta-2C chain OS=Homo sapiens GN=TUBB2C PE=1 SV=1 |
| 1    | 17.30 | 92.2    | 9   | 3/24             | K324k          | (R)M/S/M k E V D \ E Q M L N / V / Q / N K (N) | 1923.8973                       | 114.0669                   | 11.7                        | 49671.1/4.78       | HUMAN   | <a href="#">P07437</a> | <a href="#">770563</a> | Tubulin beta chain OS=Homo sapiens GN=TUBB PE=1 SV=2      |

| Fragment-Ion (m/z)      | 61.011 | 72.081 | 84.044 | 84.080 | 86.096 | 101.069 | 104.052 | 129.101 | 191.086 | 219.082 | 245.075 | 261.159 | 370.176 | 372.196 | 389.216 | 478.750 <sup>+2</sup> | 488.282 | 596.753 <sup>+2</sup> | 602.331 | 662.295 <sup>+2</sup> | 715.411 | 846.464 | 935.396 | 953.954 <sup>+2</sup> |
|-------------------------|--------|--------|--------|--------|--------|---------|---------|---------|---------|---------|---------|---------|---------|---------|---------|-----------------------|---------|-----------------------|---------|-----------------------|---------|---------|---------|-----------------------|
| Frac. Inten. (% of TIC) | 2.48   | 0.15   | 0.15   | 0.22   | 0.17   | 0.12    | 20.96   | 0.13    | 2.79    | 3.63    | 2.95    | 4.21    | 2.38    | 6.39    | 4.06    | 2.91                  | 4.65    | 3.87                  | 14.53   | 2.67                  | 8.64    | 6.17    | 2.68    | 3.08                  |
| Rel. Inten. (% of BP)   | 11.82  | 0.71   | 0.74   | 1.07   | 0.80   | 0.60    | 100.00  | 0.60    | 13.30   | 17.34   | 14.09   | 20.10   | 11.36   | 30.47   | 19.39   | 13.88                 | 22.18   | 18.46                 | 69.31   | 12.74                 | 41.24   | 29.45   | 12.81   | 14.72                 |
| Score                   | -0.12  | 0.50   | 1.00   | 0.50   | 0.22   |         | 0.50    | 0.20    | 0.50    | 0.75    | 0.75    | 1.50    | -0.11   | 0.75    | 1.50    | -0.14                 | 1.50    | 0.50                  | 1.50    | 0.50                  | 1.50    | 0.50    | 0.50    | 1.50                  |
| Ion-type                |        | V      | E      | KQ     | LI     | KQ      | a1      | RKQ     | a2      | b2      | DE      | y2      |         | y3-NH3  | y3      |                       | y4      | b9 <sup>+2</sup>      | y5      | b10 <sup>+2</sup>     | y6      | y7      | b7      | y15 <sup>+2</sup>     |
| Delta ppm               |        | 8.7    | -4.6   | -12.8  | -4.9   |         | -13.9   | -10.4   | -1.4    | 4.6     | -10.2   | 11.4    |         | 22.7    | 4.6     |                       | -0.9    | -0.4                  | 9.5     | 33.4                  | 1.2     | 15.9    | -1.1    | 0.4                   |

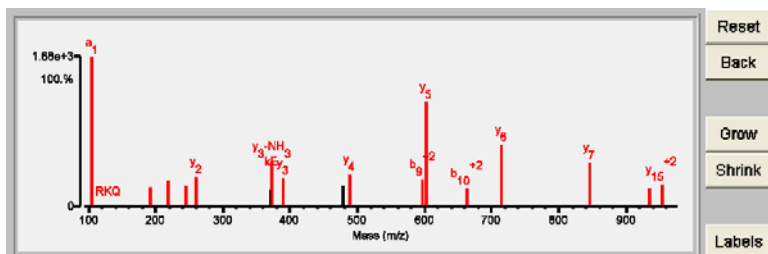

Reset

Back

Grow

Shrink

Labels



Result Summary

| Rank | Score | SPI (%) | BCS | # Unmatched Ions | Variable sites | Sequence               | MH <sup>+</sup> Calculated (Da) | MH <sup>+</sup> Error (Da) | MH <sup>+</sup> Error (ppm) | Protein MW/pl (Da) | Species | Accession # | Protein Name                                              |
|------|-------|---------|-----|------------------|----------------|------------------------|---------------------------------|----------------------------|-----------------------------|--------------------|---------|-------------|-----------------------------------------------------------|
| 1    | 17.09 | 72.6    | 10  | 8/25             | K58k           | (R)INVVYNEATGGKYVPR(A) | 1843.9337                       | 114.0537                   | 5.5                         | 49831.3/4.79       | HUMAN   | P68371      | Tubulin beta-2C chain OS=Homo sapiens GN=TUBB2C PE=1 SV=1 |

Detailed Results

| Rank                                                                                                                                                                                                                                                                                                                                                                                                                                                                                                                                                                                                                                                                                                                                                                                                                                                                                                                                                                                                                                                                                                                                                                                                                                                                                                                                                                                                                                                                                                                                                                                                                                                                                                                                                                                                                                                                                                                                                                                                                                                                                                                                                                                                                                                                                                                                                                                                                                                                                                                                                                                                                                                                                                                | Score  | SPI (%) | BCS            | # Unmatched Ions | Variable sites | Sequence               | MH <sup>+</sup> Calculated (Da) | MH <sup>+</sup> Error (Da) | MH <sup>+</sup> Error (ppm) | Protein MW/pl (Da) | Species | Accession # | MS-Digest Index # | Protein Name                                              |                              |                       |                               |                |                       |                |                       |                |                |                |          |         |         |         |         |         |                       |                       |         |                       |         |                       |         |         |         |          |                         |      |      |       |      |      |      |      |      |      |      |      |      |      |      |      |      |      |      |      |      |      |      |      |      |      |                       |      |       |        |      |      |       |       |       |       |       |       |       |       |       |       |       |       |       |       |       |       |       |       |       |       |       |      |       |      |      |      |      |      |       |      |      |      |       |       |       |      |       |      |      |      |      |       |      |       |      |      |          |   |   |                |    |   |                |                |    |                |                |      |  |  |  |                              |                |                               |                |                |                |                |                |                |                |           |       |  |      |      |       |       |      |  |       |      |      |  |  |  |      |     |      |      |      |  |      |      |  |      |
|---------------------------------------------------------------------------------------------------------------------------------------------------------------------------------------------------------------------------------------------------------------------------------------------------------------------------------------------------------------------------------------------------------------------------------------------------------------------------------------------------------------------------------------------------------------------------------------------------------------------------------------------------------------------------------------------------------------------------------------------------------------------------------------------------------------------------------------------------------------------------------------------------------------------------------------------------------------------------------------------------------------------------------------------------------------------------------------------------------------------------------------------------------------------------------------------------------------------------------------------------------------------------------------------------------------------------------------------------------------------------------------------------------------------------------------------------------------------------------------------------------------------------------------------------------------------------------------------------------------------------------------------------------------------------------------------------------------------------------------------------------------------------------------------------------------------------------------------------------------------------------------------------------------------------------------------------------------------------------------------------------------------------------------------------------------------------------------------------------------------------------------------------------------------------------------------------------------------------------------------------------------------------------------------------------------------------------------------------------------------------------------------------------------------------------------------------------------------------------------------------------------------------------------------------------------------------------------------------------------------------------------------------------------------------------------------------------------------|--------|---------|----------------|------------------|----------------|------------------------|---------------------------------|----------------------------|-----------------------------|--------------------|---------|-------------|-------------------|-----------------------------------------------------------|------------------------------|-----------------------|-------------------------------|----------------|-----------------------|----------------|-----------------------|----------------|----------------|----------------|----------|---------|---------|---------|---------|---------|-----------------------|-----------------------|---------|-----------------------|---------|-----------------------|---------|---------|---------|----------|-------------------------|------|------|-------|------|------|------|------|------|------|------|------|------|------|------|------|------|------|------|------|------|------|------|------|------|------|-----------------------|------|-------|--------|------|------|-------|-------|-------|-------|-------|-------|-------|-------|-------|-------|-------|-------|-------|-------|-------|-------|-------|-------|-------|-------|-------|------|-------|------|------|------|------|------|-------|------|------|------|-------|-------|-------|------|-------|------|------|------|------|-------|------|-------|------|------|----------|---|---|----------------|----|---|----------------|----------------|----|----------------|----------------|------|--|--|--|------------------------------|----------------|-------------------------------|----------------|----------------|----------------|----------------|----------------|----------------|----------------|-----------|-------|--|------|------|-------|-------|------|--|-------|------|------|--|--|--|------|-----|------|------|------|--|------|------|--|------|
| 1                                                                                                                                                                                                                                                                                                                                                                                                                                                                                                                                                                                                                                                                                                                                                                                                                                                                                                                                                                                                                                                                                                                                                                                                                                                                                                                                                                                                                                                                                                                                                                                                                                                                                                                                                                                                                                                                                                                                                                                                                                                                                                                                                                                                                                                                                                                                                                                                                                                                                                                                                                                                                                                                                                                   | 17.09  | 72.6    | 10             | 8/25             | K58k           | (R)INVVYNEATGGKYVPR(A) | 1843.9337                       | 114.0537                   | 5.5                         | 49831.3/4.79       | HUMAN   | P68371      | 770423            | Tubulin beta-2C chain OS=Homo sapiens GN=TUBB2C PE=1 SV=1 |                              |                       |                               |                |                       |                |                       |                |                |                |          |         |         |         |         |         |                       |                       |         |                       |         |                       |         |         |         |          |                         |      |      |       |      |      |      |      |      |      |      |      |      |      |      |      |      |      |      |      |      |      |      |      |      |      |                       |      |       |        |      |      |       |       |       |       |       |       |       |       |       |       |       |       |       |       |       |       |       |       |       |       |       |      |       |      |      |      |      |      |       |      |      |      |       |       |       |      |       |      |      |      |      |       |      |       |      |      |          |   |   |                |    |   |                |                |    |                |                |      |  |  |  |                              |                |                               |                |                |                |                |                |                |                |           |       |  |      |      |       |       |      |  |       |      |      |  |  |  |      |     |      |      |      |  |      |      |  |      |
| <table border="1"> <thead> <tr> <th>Fragment-ion (m/z)</th> <th>72.080</th> <th>84.082</th> <th>86.097</th> <th>87.055</th> <th>136.074</th> <th>228.133</th> <th>272.171</th> <th>273.176</th> <th>278.109</th> <th>327.201</th> <th>371.239</th> <th>400.223</th> <th>439.250</th> <th>445.240</th> <th>478.201</th> <th>524.732<sup>+2</sup></th> <th>531.790<sup>+2</sup></th> <th>534.303</th> <th>734.858<sup>+2</sup></th> <th>833.460</th> <th>865.963<sup>+2</sup></th> <th>890.502</th> <th>923.452</th> <th>991.526</th> <th>1062.590</th> </tr> </thead> <tbody> <tr> <td>Frac. Inten. (% of TIC)</td> <td>0.20</td> <td>3.80</td> <td>21.97</td> <td>0.10</td> <td>0.29</td> <td>7.00</td> <td>2.95</td> <td>2.67</td> <td>2.70</td> <td>2.43</td> <td>6.56</td> <td>3.45</td> <td>3.76</td> <td>4.47</td> <td>2.55</td> <td>3.71</td> <td>2.73</td> <td>4.27</td> <td>4.30</td> <td>3.58</td> <td>2.88</td> <td>3.64</td> <td>2.65</td> <td>4.30</td> <td>3.04</td> </tr> <tr> <td>Rel. Inten. (% of BP)</td> <td>0.90</td> <td>17.31</td> <td>100.00</td> <td>0.45</td> <td>1.31</td> <td>31.84</td> <td>13.44</td> <td>12.16</td> <td>12.28</td> <td>11.08</td> <td>29.87</td> <td>15.71</td> <td>17.14</td> <td>20.33</td> <td>11.59</td> <td>16.89</td> <td>12.45</td> <td>19.46</td> <td>19.58</td> <td>16.29</td> <td>13.10</td> <td>16.55</td> <td>12.06</td> <td>19.56</td> <td>13.84</td> </tr> <tr> <td>Score</td> <td>0.50</td> <td>-0.17</td> <td>0.50</td> <td>0.33</td> <td>1.00</td> <td>0.50</td> <td>1.50</td> <td>-0.12</td> <td>0.75</td> <td>0.50</td> <td>1.50</td> <td>-0.16</td> <td>-0.17</td> <td>-0.20</td> <td>0.75</td> <td>-0.17</td> <td>1.50</td> <td>1.50</td> <td>1.50</td> <td>1.50</td> <td>-0.13</td> <td>1.50</td> <td>-0.12</td> <td>1.50</td> <td>1.50</td> </tr> <tr> <td>Ion-type</td> <td>V</td> <td>V</td> <td>b<sub>1</sub></td> <td>NR</td> <td>Y</td> <td>b<sub>2</sub></td> <td>y<sub>2</sub></td> <td>YN</td> <td>b<sub>3</sub></td> <td>y<sub>3</sub></td> <td>YNEA</td> <td></td> <td></td> <td></td> <td>y<sub>6</sub><sup>+2</sup></td> <td>y<sub>4</sub></td> <td>y<sub>12</sub><sup>+2</sup></td> <td>y<sub>4</sub></td> <td>y<sub>6</sub></td> <td>y<sub>7</sub></td> <td>y<sub>7</sub></td> <td>y<sub>6</sub></td> <td>y<sub>6</sub></td> <td>y<sub>9</sub></td> </tr> <tr> <td>Delta ppm</td> <td>-13.5</td> <td></td> <td>-6.1</td> <td>-5.6</td> <td>-13.2</td> <td>-10.4</td> <td>-1.5</td> <td></td> <td>-20.2</td> <td>-8.2</td> <td>-2.5</td> <td></td> <td></td> <td></td> <td>13.1</td> <td>2.9</td> <td>-1.6</td> <td>-6.1</td> <td>-3.4</td> <td></td> <td>19.9</td> <td>-5.6</td> <td></td> <td>19.8</td> </tr> </tbody> </table> |        |         |                |                  |                |                        |                                 |                            |                             |                    |         |             |                   |                                                           | Fragment-ion (m/z)           | 72.080                | 84.082                        | 86.097         | 87.055                | 136.074        | 228.133               | 272.171        | 273.176        | 278.109        | 327.201  | 371.239 | 400.223 | 439.250 | 445.240 | 478.201 | 524.732 <sup>+2</sup> | 531.790 <sup>+2</sup> | 534.303 | 734.858 <sup>+2</sup> | 833.460 | 865.963 <sup>+2</sup> | 890.502 | 923.452 | 991.526 | 1062.590 | Frac. Inten. (% of TIC) | 0.20 | 3.80 | 21.97 | 0.10 | 0.29 | 7.00 | 2.95 | 2.67 | 2.70 | 2.43 | 6.56 | 3.45 | 3.76 | 4.47 | 2.55 | 3.71 | 2.73 | 4.27 | 4.30 | 3.58 | 2.88 | 3.64 | 2.65 | 4.30 | 3.04 | Rel. Inten. (% of BP) | 0.90 | 17.31 | 100.00 | 0.45 | 1.31 | 31.84 | 13.44 | 12.16 | 12.28 | 11.08 | 29.87 | 15.71 | 17.14 | 20.33 | 11.59 | 16.89 | 12.45 | 19.46 | 19.58 | 16.29 | 13.10 | 16.55 | 12.06 | 19.56 | 13.84 | Score | 0.50 | -0.17 | 0.50 | 0.33 | 1.00 | 0.50 | 1.50 | -0.12 | 0.75 | 0.50 | 1.50 | -0.16 | -0.17 | -0.20 | 0.75 | -0.17 | 1.50 | 1.50 | 1.50 | 1.50 | -0.13 | 1.50 | -0.12 | 1.50 | 1.50 | Ion-type | V | V | b <sub>1</sub> | NR | Y | b <sub>2</sub> | y <sub>2</sub> | YN | b <sub>3</sub> | y <sub>3</sub> | YNEA |  |  |  | y <sub>6</sub> <sup>+2</sup> | y <sub>4</sub> | y <sub>12</sub> <sup>+2</sup> | y <sub>4</sub> | y <sub>6</sub> | y <sub>7</sub> | y <sub>7</sub> | y <sub>6</sub> | y <sub>6</sub> | y <sub>9</sub> | Delta ppm | -13.5 |  | -6.1 | -5.6 | -13.2 | -10.4 | -1.5 |  | -20.2 | -8.2 | -2.5 |  |  |  | 13.1 | 2.9 | -1.6 | -6.1 | -3.4 |  | 19.9 | -5.6 |  | 19.8 |
| Fragment-ion (m/z)                                                                                                                                                                                                                                                                                                                                                                                                                                                                                                                                                                                                                                                                                                                                                                                                                                                                                                                                                                                                                                                                                                                                                                                                                                                                                                                                                                                                                                                                                                                                                                                                                                                                                                                                                                                                                                                                                                                                                                                                                                                                                                                                                                                                                                                                                                                                                                                                                                                                                                                                                                                                                                                                                                  | 72.080 | 84.082  | 86.097         | 87.055           | 136.074        | 228.133                | 272.171                         | 273.176                    | 278.109                     | 327.201            | 371.239 | 400.223     | 439.250           | 445.240                                                   | 478.201                      | 524.732 <sup>+2</sup> | 531.790 <sup>+2</sup>         | 534.303        | 734.858 <sup>+2</sup> | 833.460        | 865.963 <sup>+2</sup> | 890.502        | 923.452        | 991.526        | 1062.590 |         |         |         |         |         |                       |                       |         |                       |         |                       |         |         |         |          |                         |      |      |       |      |      |      |      |      |      |      |      |      |      |      |      |      |      |      |      |      |      |      |      |      |      |                       |      |       |        |      |      |       |       |       |       |       |       |       |       |       |       |       |       |       |       |       |       |       |       |       |       |       |      |       |      |      |      |      |      |       |      |      |      |       |       |       |      |       |      |      |      |      |       |      |       |      |      |          |   |   |                |    |   |                |                |    |                |                |      |  |  |  |                              |                |                               |                |                |                |                |                |                |                |           |       |  |      |      |       |       |      |  |       |      |      |  |  |  |      |     |      |      |      |  |      |      |  |      |
| Frac. Inten. (% of TIC)                                                                                                                                                                                                                                                                                                                                                                                                                                                                                                                                                                                                                                                                                                                                                                                                                                                                                                                                                                                                                                                                                                                                                                                                                                                                                                                                                                                                                                                                                                                                                                                                                                                                                                                                                                                                                                                                                                                                                                                                                                                                                                                                                                                                                                                                                                                                                                                                                                                                                                                                                                                                                                                                                             | 0.20   | 3.80    | 21.97          | 0.10             | 0.29           | 7.00                   | 2.95                            | 2.67                       | 2.70                        | 2.43               | 6.56    | 3.45        | 3.76              | 4.47                                                      | 2.55                         | 3.71                  | 2.73                          | 4.27           | 4.30                  | 3.58           | 2.88                  | 3.64           | 2.65           | 4.30           | 3.04     |         |         |         |         |         |                       |                       |         |                       |         |                       |         |         |         |          |                         |      |      |       |      |      |      |      |      |      |      |      |      |      |      |      |      |      |      |      |      |      |      |      |      |      |                       |      |       |        |      |      |       |       |       |       |       |       |       |       |       |       |       |       |       |       |       |       |       |       |       |       |       |      |       |      |      |      |      |      |       |      |      |      |       |       |       |      |       |      |      |      |      |       |      |       |      |      |          |   |   |                |    |   |                |                |    |                |                |      |  |  |  |                              |                |                               |                |                |                |                |                |                |                |           |       |  |      |      |       |       |      |  |       |      |      |  |  |  |      |     |      |      |      |  |      |      |  |      |
| Rel. Inten. (% of BP)                                                                                                                                                                                                                                                                                                                                                                                                                                                                                                                                                                                                                                                                                                                                                                                                                                                                                                                                                                                                                                                                                                                                                                                                                                                                                                                                                                                                                                                                                                                                                                                                                                                                                                                                                                                                                                                                                                                                                                                                                                                                                                                                                                                                                                                                                                                                                                                                                                                                                                                                                                                                                                                                                               | 0.90   | 17.31   | 100.00         | 0.45             | 1.31           | 31.84                  | 13.44                           | 12.16                      | 12.28                       | 11.08              | 29.87   | 15.71       | 17.14             | 20.33                                                     | 11.59                        | 16.89                 | 12.45                         | 19.46          | 19.58                 | 16.29          | 13.10                 | 16.55          | 12.06          | 19.56          | 13.84    |         |         |         |         |         |                       |                       |         |                       |         |                       |         |         |         |          |                         |      |      |       |      |      |      |      |      |      |      |      |      |      |      |      |      |      |      |      |      |      |      |      |      |      |                       |      |       |        |      |      |       |       |       |       |       |       |       |       |       |       |       |       |       |       |       |       |       |       |       |       |       |      |       |      |      |      |      |      |       |      |      |      |       |       |       |      |       |      |      |      |      |       |      |       |      |      |          |   |   |                |    |   |                |                |    |                |                |      |  |  |  |                              |                |                               |                |                |                |                |                |                |                |           |       |  |      |      |       |       |      |  |       |      |      |  |  |  |      |     |      |      |      |  |      |      |  |      |
| Score                                                                                                                                                                                                                                                                                                                                                                                                                                                                                                                                                                                                                                                                                                                                                                                                                                                                                                                                                                                                                                                                                                                                                                                                                                                                                                                                                                                                                                                                                                                                                                                                                                                                                                                                                                                                                                                                                                                                                                                                                                                                                                                                                                                                                                                                                                                                                                                                                                                                                                                                                                                                                                                                                                               | 0.50   | -0.17   | 0.50           | 0.33             | 1.00           | 0.50                   | 1.50                            | -0.12                      | 0.75                        | 0.50               | 1.50    | -0.16       | -0.17             | -0.20                                                     | 0.75                         | -0.17                 | 1.50                          | 1.50           | 1.50                  | 1.50           | -0.13                 | 1.50           | -0.12          | 1.50           | 1.50     |         |         |         |         |         |                       |                       |         |                       |         |                       |         |         |         |          |                         |      |      |       |      |      |      |      |      |      |      |      |      |      |      |      |      |      |      |      |      |      |      |      |      |      |                       |      |       |        |      |      |       |       |       |       |       |       |       |       |       |       |       |       |       |       |       |       |       |       |       |       |       |      |       |      |      |      |      |      |       |      |      |      |       |       |       |      |       |      |      |      |      |       |      |       |      |      |          |   |   |                |    |   |                |                |    |                |                |      |  |  |  |                              |                |                               |                |                |                |                |                |                |                |           |       |  |      |      |       |       |      |  |       |      |      |  |  |  |      |     |      |      |      |  |      |      |  |      |
| Ion-type                                                                                                                                                                                                                                                                                                                                                                                                                                                                                                                                                                                                                                                                                                                                                                                                                                                                                                                                                                                                                                                                                                                                                                                                                                                                                                                                                                                                                                                                                                                                                                                                                                                                                                                                                                                                                                                                                                                                                                                                                                                                                                                                                                                                                                                                                                                                                                                                                                                                                                                                                                                                                                                                                                            | V      | V       | b <sub>1</sub> | NR               | Y              | b <sub>2</sub>         | y <sub>2</sub>                  | YN                         | b <sub>3</sub>              | y <sub>3</sub>     | YNEA    |             |                   |                                                           | y <sub>6</sub> <sup>+2</sup> | y <sub>4</sub>        | y <sub>12</sub> <sup>+2</sup> | y <sub>4</sub> | y <sub>6</sub>        | y <sub>7</sub> | y <sub>7</sub>        | y <sub>6</sub> | y <sub>6</sub> | y <sub>9</sub> |          |         |         |         |         |         |                       |                       |         |                       |         |                       |         |         |         |          |                         |      |      |       |      |      |      |      |      |      |      |      |      |      |      |      |      |      |      |      |      |      |      |      |      |      |                       |      |       |        |      |      |       |       |       |       |       |       |       |       |       |       |       |       |       |       |       |       |       |       |       |       |       |      |       |      |      |      |      |      |       |      |      |      |       |       |       |      |       |      |      |      |      |       |      |       |      |      |          |   |   |                |    |   |                |                |    |                |                |      |  |  |  |                              |                |                               |                |                |                |                |                |                |                |           |       |  |      |      |       |       |      |  |       |      |      |  |  |  |      |     |      |      |      |  |      |      |  |      |
| Delta ppm                                                                                                                                                                                                                                                                                                                                                                                                                                                                                                                                                                                                                                                                                                                                                                                                                                                                                                                                                                                                                                                                                                                                                                                                                                                                                                                                                                                                                                                                                                                                                                                                                                                                                                                                                                                                                                                                                                                                                                                                                                                                                                                                                                                                                                                                                                                                                                                                                                                                                                                                                                                                                                                                                                           | -13.5  |         | -6.1           | -5.6             | -13.2          | -10.4                  | -1.5                            |                            | -20.2                       | -8.2               | -2.5    |             |                   |                                                           | 13.1                         | 2.9                   | -1.6                          | -6.1           | -3.4                  |                | 19.9                  | -5.6           |                | 19.8           |          |         |         |         |         |         |                       |                       |         |                       |         |                       |         |         |         |          |                         |      |      |       |      |      |      |      |      |      |      |      |      |      |      |      |      |      |      |      |      |      |      |      |      |      |                       |      |       |        |      |      |       |       |       |       |       |       |       |       |       |       |       |       |       |       |       |       |       |       |       |       |       |      |       |      |      |      |      |      |       |      |      |      |       |       |       |      |       |      |      |      |      |       |      |       |      |      |          |   |   |                |    |   |                |                |    |                |                |      |  |  |  |                              |                |                               |                |                |                |                |                |                |                |           |       |  |      |      |       |       |      |  |       |      |      |  |  |  |      |     |      |      |      |  |      |      |  |      |

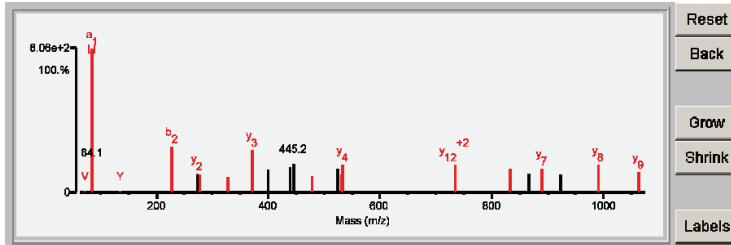

Result Summary

| Rank | Score | SPI (%) | BCS | # Unmatched Ions | Variable sites | Sequence                  | MH <sup>+</sup> Calculated (Da) | MH <sup>+</sup> Error (Da) | MH <sup>+</sup> Error (ppm) | Protein MW/pl (Da) | Species | Accession # | Protein Name                                                                            |
|------|-------|---------|-----|------------------|----------------|---------------------------|---------------------------------|----------------------------|-----------------------------|--------------------|---------|-------------|-----------------------------------------------------------------------------------------|
| 1    | 15.81 | 82.2    | 7   | 8/25             | K412k          | (R)TVVSGLVQFVPEKEELQDR(L) | 2044.1073                       | 114.0542                   | 5.2                         | 59143.8/6.61       | HUMAN   | P54577      | Tyrosyl-tRNA synthetase, cytoplasmic OS=Homo sapiens GN=YARS PE=1 SV=4                  |
| 2    | 5.12  | 52.3    | 2   | 14/25            | K56k K70k      | (K)WIKGLVSNPLKSTVMEK(K)   | 1930.0830                       | 228.0785                   | -3.4                        | 61175.5/6.34       | HUMAN   | RQ9H223     | REVERSE EH domain-containing protein 4 OS=Homo sapiens GN=EHD4 PE=1 SV=1                |
| 3    | 4.87  | 52.3    | 2   | 14/25            | K56k K64k      | (K)WIKGLVSNPLKSTVMEK(K)   | 1930.0830                       | 228.0785                   | -3.4                        | 61175.5/6.34       | HUMAN   | RQ9H223     | REVERSE EH domain-containing protein 4 OS=Homo sapiens GN=EHD4 PE=1 SV=1                |
| 4    | 4.50  | 55.9    | 2   | 15/25            | None           | (K)LSLDDVQKLIKDRDKSR(S)   | 2158.1826                       | -0.0211                    | -9.8                        | 316052.8/8.09      | HUMAN   | Q6KC79      | Nipped-B-like protein OS=Homo sapiens GN=NPBL PE=1 SV=2                                 |
| 5    | 4.11  | 59.9    | 2   | 14/25            | K179k          | (K)DTVALNYKHVKIEEK(S)     | 2044.1073                       | 114.0542                   | 5.2                         | 27562.4/7.17       | HUMAN   | RQ86WH2     | REVERSE Ras association domain-containing protein 3 OS=Homo sapiens GN=RASSF3 PE=2 SV=1 |

Detailed Results

| Rank                   | Score | SPI (%) | BCS    | # Unmatched Ions | Variable sites | Sequence                                        | MH <sup>+</sup> Calculated (Da) | MH <sup>+</sup> Error (Da) | MH <sup>+</sup> Error (ppm) | Protein MW/pl (Da)  | Species | Accession #                  | MS-Digest Index # | Protein Name                                                           |                              |                              |                              |         |         |         |                               |                               |                               |                               |                       |          |
|------------------------|-------|---------|--------|------------------|----------------|-------------------------------------------------|---------------------------------|----------------------------|-----------------------------|---------------------|---------|------------------------------|-------------------|------------------------------------------------------------------------|------------------------------|------------------------------|------------------------------|---------|---------|---------|-------------------------------|-------------------------------|-------------------------------|-------------------------------|-----------------------|----------|
| 1                      | 15.81 | 82.2    | 7      | 8/25             | K412k          | (R) T V V S / G L V Q F V P K E E L Q D R ( L ) | 2044.1073                       | 114.0542                   | 5.2                         | 59143.8/6.61        | HUMAN   | P54577                       | 764461            | Tyrosyl-tRNA synthetase, cytoplasmic OS=Homo sapiens GN=YARS PE=1 SV=4 |                              |                              |                              |         |         |         |                               |                               |                               |                               |                       |          |
| Fragment-ion (m/z)     |       | 72.079  | 84.079 | 86.096           | 173.127        | 174.130                                         | 175.122                         | 201.123                    | 202.123                     | 329.209             | 357.211 | 370.725 <sup>+2</sup>        | 497.232           | 531.295                                                                | 564.788 <sup>+2</sup>        | 584.317                      | 614.328                      | 632.335 | 701.449 | 731.430 | 752.394 <sup>+2</sup>         | 886.455 <sup>+2</sup>         | 929.980 <sup>+2</sup>         | 936.510                       | 979.525 <sup>+2</sup> | 1128.550 |
| Frac. Inten.(% of TIC) |       | 0.19    | 0.10   | 0.14             | 14.11          | 2.90                                            | 2.04                            | 8.90                       | 2.57                        | 1.75                | 3.26    | 1.72                         | 1.84              | 3.05                                                                   | 15.38                        | 1.72                         | 3.84                         | 2.50    | 1.99    | 2.43    | 2.60                          | 2.54                          | 4.26                          | 2.51                          | 8.00                  | 9.66     |
| Rel. Inten.(% of BP)   |       | 1.26    | 0.67   | 0.91             | 91.75          | 18.86                                           | 13.27                           | 57.89                      | 16.71                       | 11.39               | 21.21   | 11.19                        | 11.94             | 19.81                                                                  | 100.00                       | 11.72                        | 25.00                        | 16.24   | 12.92   | 15.83   | 16.91                         | 16.54                         | 27.69                         | 16.31                         | 52.03                 | 62.80    |
| Score                  |       | 0.50    | 0.50   | 0.22             | 0.50           | -0.19                                           | 1.50                            | 0.50                       | -0.17                       | 0.50                | 0.75    | -0.11                        | -0.12             | 1.50                                                                   | 1.50                         | -0.11                        | 1.50                         | 0.75    | -0.13   | 0.75    | 12.8                          | 1.50                          | 1.50                          | -0.16                         | 1.50                  | 1.50     |
| Ion-type               |       | V       | KQ     | LI               | a <sub>2</sub> | y <sub>1</sub>                                  | b <sub>2</sub>                  | y <sub>1</sub>             | b <sub>2</sub>              | SGLV <sup>+28</sup> | SGLV    | y <sub>8</sub> <sup>+2</sup> | y <sub>4</sub>    | y <sub>8</sub> <sup>+2</sup>                                           | y <sub>6</sub> <sup>+2</sup> | y <sub>8</sub> <sup>+2</sup> | y <sub>8</sub> <sup>+2</sup> | SGLVQF  | SGLVQF  | SGLVQFV | y <sub>14</sub> <sup>+2</sup> | y <sub>15</sub> <sup>+2</sup> | y <sub>16</sub> <sup>+2</sup> | y <sub>16</sub> <sup>+2</sup> | y <sub>8</sub>        |          |
| Delta ppm              |       | -20.5   | -16.4  | -3.8             | -15.3          |                                                 | 19.7                            | -8.8                       |                             | -30.8               | -9.6    |                              |                   | 12.9                                                                   | 12.9                         | 3.1                          |                              | -10.8   |         | 28.2    | -17.7                         | -7.5                          | -7.5                          | 4.1                           | -12.5                 |          |
|                        |       |         |        |                  |                |                                                 |                                 |                            |                             |                     |         |                              |                   |                                                                        |                              |                              |                              |         |         |         |                               |                               |                               |                               |                       |          |

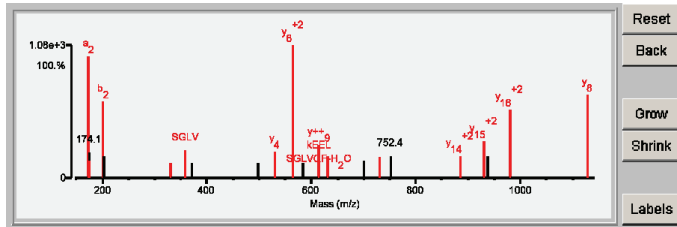

Result Summary

| Rank | Score | SPI (%) | BCS | # Unmatched Ions | Variable sites | Sequence             | MH <sup>+</sup> Calculated (Da) | MH <sup>+</sup> Error (Da) | MH <sup>+</sup> Error (ppm) | Protein MW/pi (Da) | Species | Accession # | Protein Name                                                           |
|------|-------|---------|-----|------------------|----------------|----------------------|---------------------------------|----------------------------|-----------------------------|--------------------|---------|-------------|------------------------------------------------------------------------|
| 1    | 12.10 | 72.3    | 7   | 9/25             | K513k          | (K)QTNFMTKLGSISCK(S) | 1614.7978                       | 114.0481                   | 3.0                         | 59143.8/6.61       | HUMAN   | P54577      | Tyrosyl-tRNA synthetase, cytoplasmic OS=Homo sapiens GN=YARS PE=1 SV=4 |

Detailed Results

| Rank | Score | SPI (%) | BCS | # Unmatched Ions | Variable sites | Sequence                                       | MH <sup>+</sup> Calculated (Da) | MH <sup>+</sup> Error (Da) | MH <sup>+</sup> Error (ppm) | Protein MW/pi (Da) | Species | Accession # | MS-Digest Index # | Protein Name                                                           |
|------|-------|---------|-----|------------------|----------------|------------------------------------------------|---------------------------------|----------------------------|-----------------------------|--------------------|---------|-------------|-------------------|------------------------------------------------------------------------|
| 1    | 12.10 | 72.3    | 7   | 9/25             | K513k          | (K)Q T N F M T K L / G / S / I / S / C / K (S) | 1614.7978                       | 114.0481                   | 3.0                         | 59143.8/6.61       | HUMAN   | P54577      | 764461            | Tyrosyl-tRNA synthetase, cytoplasmic OS=Homo sapiens GN=YARS PE=1 SV=4 |

  

| Fragment-ion (m/z)      | 70.066 | 84.045 | 84.081 | 86.096 | 87.056 | 120.081 | 129.099 | 140.071 | 141.102 | 147.112 | 213.088 | 307.144 | 327.131 | 344.176 | 394.175 | 445.225 | 474.201 | 507.249 | 553.802*2 | 594.293 | 604.266 | 651.317 | 687.284 | 704.317 | 764.396 |
|-------------------------|--------|--------|--------|--------|--------|---------|---------|---------|---------|---------|---------|---------|---------|---------|---------|---------|---------|---------|-----------|---------|---------|---------|---------|---------|---------|
| Frac. Inten. (% of TIC) | 0.13   | 5.26   | 0.66   | 0.37   | 0.07   | 0.12    | 0.09    | 2.49    | 2.47    | 3.16    | 2.54    | 9.40    | 4.42    | 2.49    | 8.08    | 4.36    | 7.69    | 2.39    | 2.77      | 5.08    | 2.33    | 16.75   | 3.01    | 4.77    | 9.11    |
| Rel. Inten. (% of BP)   | 0.76   | 31.39  | 3.93   | 2.21   | 0.41   | 0.73    | 0.55    | 14.88   | 14.72   | 18.86   | 15.17   | 56.08   | 26.36   | 14.84   | 48.24   | 26.02   | 45.93   | 14.24   | 16.55     | 30.31   | 13.89   | 100.00  | 17.96   | 28.45   | 54.38   |
| Score                   | -0.01  | -0.31  | 0.50   | 0.22   | 0.33   | 1.00    | 0.20    | -0.15   | -0.15   | 1.50    | 0.25    | 1.50    | 0.25    | -0.15   | 1.50    | -0.26   | 0.25    | 1.50    | -0.17     | 1.50    | 0.25    | 1.50    | -0.18   | -0.28   | 1.50    |
| Ion-type                |        |        | KQ     | LI     | NR     | F       | RKQ     |         | y1      | b2-NH3  |         | y2      | b3-NH3  |         | y3      |         | b4-NH3  | y4      |           | a5      | b5-H2O  | y6      |         | y7      |         |
| Delta ppm               |        |        | 1.5    | -2.6   | 11.6   | 3.5     | -28.2   |         | -4.8    | 1.0     | 1.1     | 1.2     |         | -0.5    |         | 2.7     | -20.6   |         | 36.4      | 16.1    | 5.6     |         |         | -1.8    |         |

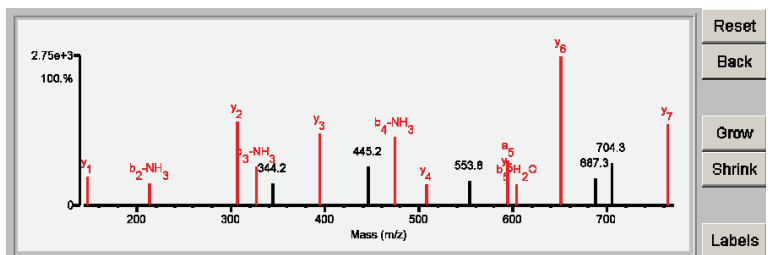

Result Summary

| Rank | Score | SPI (%) | BCS | # Unmatched Ions | Variable sites | Sequence                | MH <sup>+</sup> Calculated (Da) | MH <sup>+</sup> Error (Da) | MH <sup>+</sup> Error (ppm) | Protein MW (kDa) | Species | Accession # | Protein Name                                                                                                         |
|------|-------|---------|-----|------------------|----------------|-------------------------|---------------------------------|----------------------------|-----------------------------|------------------|---------|-------------|----------------------------------------------------------------------------------------------------------------------|
| 1    | 17.08 | 72.9    | 9   | 8/25             | K329k          | (K)VLVYDMLAGKLPVHQVR(G) | 2214.2467                       | 114.0642                   | 9.1                         | 62003.9/8.93     | HUMAN   | Q9YSJ1      | U3 small nucleolar RNA-associated protein 18 homolog OS=Homo sapiens GN=UTP18 PE=1 SV=3                              |
| 2    | 3.91  | 50.7    | 2   | 15/25            | None           | (R)QQVLPDLSYKTLFDWKR(S) | 2328.3074                       | 0.0035                     | 1.5                         | 226374.8/6.95    | HUMAN   | A6NHR9      | Structural maintenance of chromosomes flexible hinge domain-containing protein 1 OS=Homo sapiens GN=SMCHD1 PE=1 SV=2 |

Detailed Results

| Rank                    | Score | SPI (%) | BCS | # Unmatched Ions | Variable sites | Sequence                                 | MH <sup>+</sup> Calculated (Da) | MH <sup>+</sup> Error (Da) | MH <sup>+</sup> Error (ppm) | Protein MW (kDa) | Species | Accession # | MS-Digest Index # | Protein Name                                                                            |         |         |         |         |         |         |         |         |         |         |                       |         |                       |         |         |                       |         |      |      |      |  |  |
|-------------------------|-------|---------|-----|------------------|----------------|------------------------------------------|---------------------------------|----------------------------|-----------------------------|------------------|---------|-------------|-------------------|-----------------------------------------------------------------------------------------|---------|---------|---------|---------|---------|---------|---------|---------|---------|---------|-----------------------|---------|-----------------------|---------|---------|-----------------------|---------|------|------|------|--|--|
| 1                       | 17.08 | 72.9    | 9   | 8/25             | K329k          | (K)V L V Y D M L A G K L P V H Q V R (G) | 2214.2467                       | 114.0642                   | 9.1                         | 62003.9/8.93     | HUMAN   | Q9YSJ1      | 826587            | U3 small nucleolar RNA-associated protein 18 homolog OS=Homo sapiens GN=UTP18 PE=1 SV=3 |         |         |         |         |         |         |         |         |         |         |                       |         |                       |         |         |                       |         |      |      |      |  |  |
| Fragment-ion (m/z)      |       |         |     |                  |                |                                          | 72.079                          | 84.080                     | 86.096                      | 104.050          | 110.067 | 136.075     | 137.074           | 141.098                                                                                 | 175.117 | 185.163 | 213.161 | 235.144 | 270.164 | 368.219 | 376.235 | 485.297 | 539.300 | 608.391 | 630.914 <sup>+2</sup> | 666.390 | 673.347 <sup>+3</sup> | 735.421 | 848.511 | 927.493 <sup>+2</sup> | 961.596 |      |      |      |  |  |
| Frac. Inten. (% of TIC) |       |         |     |                  |                |                                          | 0.72                            | 0.19                       | 0.44                        | 2.37             | 0.12    | 0.54        | 3.77              | 2.46                                                                                    | 2.46    | 12.66   | 2.93    | 12.69   | 3.12    | 3.33    | 19.88   | 15.18   | 15.98   | 3.62    | 2.32                  | 3.99    | 3.23                  | 3.21    | 16.72   | 5.59                  | 5.40    | 2.92 |      |      |  |  |
| Rel. Inten. (% of BP)   |       |         |     |                  |                |                                          | 4.31                            | 1.15                       | 2.62                        | 14.18            | 0.70    | 3.21        | 22.51             | 14.69                                                                                   | 14.69   | 75.73   | 17.51   | 75.86   | 18.66   | 19.88   | 15.18   | 15.98   | 21.66   | 13.88   | 23.88                 | 19.30   | 19.18                 | 100.00  | 33.43   | 32.31                 | 17.45   |      |      |      |  |  |
| Score                   |       |         |     |                  |                |                                          | 0.50                            | 0.50                       | 0.22                        | -0.10            | 1.00    | 1.00        | -0.16             | -0.10                                                                                   | 1.50    | 0.50    | 0.50    | -0.53   | 1.50    | 1.50    | 0.75    | -0.11   | 1.50    | 0.75    | -0.11                 | 1.50    | -0.10                 | -0.17   | 1.50    | -0.13                 | 1.50    | 1.50 | 1.50 | 1.50 |  |  |
| Ion-type                |       |         |     |                  |                |                                          | a1                              | KQ                         | LI                          | H                | Y       | Y           | Y                 | Y1                                                                                      | a2      | b2      | y**4    | y**6    | b2      | y6      |         |         |         |         |                       |         |                       |         |         |                       |         |      |      |      |  |  |
| Delta ppm               |       |         |     |                  |                |                                          | -34.3                           | -4.5                       | -9.6                        |                  |         | -37.9       | -7.3              |                                                                                         |         | -12.9   | -17.5   | 1.6     |         |         | 30.5    | 6.4     |         | 29.6    |                       |         |                       |         |         |                       |         |      |      |      |  |  |
|                         |       |         |     |                  |                |                                          | 0.50                            |                            |                             |                  |         |             |                   |                                                                                         |         |         |         |         |         |         |         |         |         |         |                       |         |                       |         |         |                       |         |      |      |      |  |  |
|                         |       |         |     |                  |                |                                          | V                               |                            |                             |                  |         |             |                   |                                                                                         |         |         |         |         |         |         |         |         |         |         |                       |         |                       |         |         |                       |         |      |      |      |  |  |
|                         |       |         |     |                  |                |                                          | -19.1                           |                            |                             |                  |         |             |                   |                                                                                         |         |         |         |         |         |         |         |         |         |         |                       |         |                       |         |         |                       |         |      |      |      |  |  |

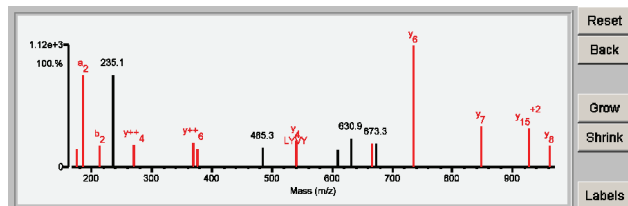

Result Summary

| Rank | Score | SPI (%) | BCS | # Unmatched ions | Variable sites | Sequence                    | MH <sup>+</sup> Calculated (Da) | MH <sup>+</sup> Error (Da) | MH <sup>+</sup> Error (ppm) | Protein MW/pl (Da) | Species | Accession # | Protein Name                                  |
|------|-------|---------|-----|------------------|----------------|-----------------------------|---------------------------------|----------------------------|-----------------------------|--------------------|---------|-------------|-----------------------------------------------|
| 1    | 25.09 | 97.6    | 14  | 1/25             | K11k           | (K) TLTGKTITLVEPSDTIENVK(A) | 2288.2231                       | 114.0612                   | 7.6                         | 8564.9/6.56        | HUMAN   | P62988      | Ubiquitin OS=Homo sapiens GN=RPS27A PE=1 SV=1 |

Detailed Results

| Rank                    | Score  | SPI (%) | BCS     | # Unmatched ions | Variable sites | Sequence                                                | MH <sup>+</sup> Calculated (Da) | MH <sup>+</sup> Error (Da) | MH <sup>+</sup> Error (ppm) | Protein MW/pl (Da) | Species  | Accession #       | MS-Digest Index #      | Protein Name                                  |          |          |          |          |          |          |          |          |          |          |          |
|-------------------------|--------|---------|---------|------------------|----------------|---------------------------------------------------------|---------------------------------|----------------------------|-----------------------------|--------------------|----------|-------------------|------------------------|-----------------------------------------------|----------|----------|----------|----------|----------|----------|----------|----------|----------|----------|----------|
| 1                       | 25.09  | 97.6    | 14      | 1/25             | K11k           | (K) T L / 7 / G K I T I T L V E I P S D T I E N V K (A) | 2288.2231                       | 114.0612                   | 7.6                         | 8564.9/6.56        | HUMAN    | P62988            | 814891                 | Ubiquitin OS=Homo sapiens GN=RPS27A PE=1 SV=1 |          |          |          |          |          |          |          |          |          |          |          |
| Fragment-ion (m/z)      | 84.080 | 187.144 | 360.229 | 489.264          | 615.347        | 703.396                                                 | 716.397                         | 811.486                    | 829.490                     | 1002.505           | 1043.601 | 1044.059          | 1094.569 <sup>+2</sup> | 1128.586 <sup>+2</sup>                        | 1131.544 | 1172.655 | 1204.404 | 1230.608 | 1271.688 | 1359.666 | 1400.763 | 1472.747 | 1573.810 | 1686.872 | 1787.916 |
| Frac. Inten. (% of TIC) | 0.13   | 2.24    | 2.42    | 2.30             | 3.17           | 3.08                                                    | 2.94                            | 2.36                       | 4.41                        | 14.96              | 6.88     | 2.26              | 3.29                   | 3.82                                          | 6.71     | 2.71     | 2.41     | 5.12     | 4.23     | 5.78     | 5.50     | 3.32     | 4.86     | 2.38     | 2.72     |
| Rel. Inten. (% of BP)   | 0.85   | 14.97   | 16.18   | 15.35            | 21.21          | 20.62                                                   | 19.67                           | 15.77                      | 29.47                       | 100.00             | 46.01    | 15.12             | 22.01                  | 25.53                                         | 44.88    | 18.15    | 16.13    | 34.25    | 28.29    | 38.65    | 36.80    | 22.17    | 32.48    | 15.91    | 18.16    |
| Score                   | 0.50   | 0.50    | 1.50    | 1.50             | 0.75           | 1.50                                                    | 0.75                            | 0.25                       | 0.50                        | 1.50               | 0.50     | 1.50              | 1.50                   | 0.50                                          | 1.50     | 0.50     | -0.16    | 1.50     | 0.50     | 1.50     | 1.50     | 1.50     | 1.50     | 1.50     | 1.50     |
| Ion-type                | KQ     | a2      | y3      | y4               | b5             | y6                                                      | b6                              | b7+H2O                     | b7                          | y9                 | b9       | y <sup>+</sup> 18 | y19 <sup>+2</sup>      | b20 <sup>+2</sup>                             | y10      | b10      |          | y11      | b11      | y12      | b12      | y13      | y14      | y15      | y16      |
| Delta ppm               | -14.0  | -7.0    | 14.3    | -4.8             | -0.6           | -2.8                                                    | 2.5                             | 21.9                       | 13.6                        | -4.9               | -9.6     | 11.6              | -1.9                   | 1.7                                           | -7.6     | 1.8      |          | -10.9    | -26.3    | 1.5      | -1.0     | -0.9     | 9.0      | -4.4     | -6.5     |

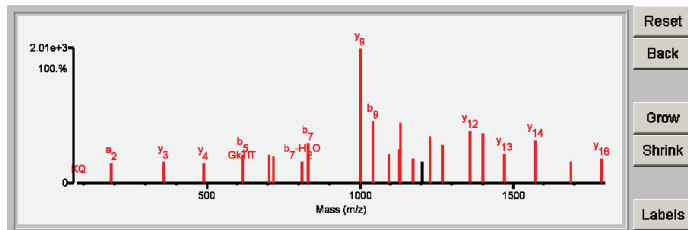

Reset

Back

Grow

Shrink

Labels

Result Summary

| Rank | Score | SPI (%) | BCS | # Unmatched Ions | Variable sites | Sequence                      | MH <sup>+</sup> Calculated (Da) | MH <sup>+</sup> Error (Da) | MH <sup>+</sup> Error (ppm) | Protein MW/pI (Da) | Species | Accession # | Protein Name                                                               |
|------|-------|---------|-----|------------------|----------------|-------------------------------|---------------------------------|----------------------------|-----------------------------|--------------------|---------|-------------|----------------------------------------------------------------------------|
| 1    | 13.45 | 68.3    | 7   | 8/25             | K11k K27k      | (K)TLTGKTTILEVPSDTIENVK(I)    | 2487.3552                       | 228.1077                   | 8.1                         | 8564.9/6.56        | HUMAN   | P62988      | Ubiquitin OS=Homo sapiens GN=RPS27A PE=1 SV=1                              |
| 2    | 10.11 | 63.5    | 5   | 10/25            | K11k K29k      | (K)TLTGKTTILEVPSDTIENVK(I)    | 2487.3552                       | 228.1077                   | 8.1                         | 8564.9/6.56        | HUMAN   | P62988      | Ubiquitin OS=Homo sapiens GN=RPS27A PE=1 SV=1                              |
| 3    | 4.18  | 57.3    | 2   | 13/25            | K170k K183k    | (R)KQETISMLDVKAKSETQARP(K)(S) | 2487.3599                       | 228.1030                   | 6.3                         | 139988.7/6.05      | HUMAN   | RP78312     | REVERSE Uncharacterized protein C4orf8 OS=Homo sapiens GN=C4orf8 PE=1 SV=2 |
| 4    | 3.93  | 57.3    | 2   | 13/25            | K170k K181k    | (R)KQETISMLDVKAKSETQARP(K)(S) | 2487.3599                       | 228.1030                   | 6.3                         | 139988.7/6.05      | HUMAN   | RP78312     | REVERSE Uncharacterized protein C4orf8 OS=Homo sapiens GN=C4orf8 PE=1 SV=2 |

Detailed Results

| Rank | Score | SPI (%) | BCS | # Unmatched Ions | Variable sites | Sequence                       | MH <sup>+</sup> Calculated (Da) | MH <sup>+</sup> Error (Da) | MH <sup>+</sup> Error (ppm) | Protein MW/pI (Da) | Species | Accession # | MS-Digest Index # | Protein Name                                  |
|------|-------|---------|-----|------------------|----------------|--------------------------------|---------------------------------|----------------------------|-----------------------------|--------------------|---------|-------------|-------------------|-----------------------------------------------|
| 1    | 13.45 | 68.3    | 7   | 8/25             | K11k K27k      | (K)TLTGKTTILEVPSDTIENVK/A/K(I) | 2487.3552                       | 228.1077                   | 8.1                         | 8564.9/6.56        | HUMAN   | P62988      | 814891            | Ubiquitin OS=Homo sapiens GN=RPS27A PE=1 SV=1 |

| Fragment-ion (m/z)      | 70.066 | 72.079 | 74.058 | 84.083 | 86.094 | 102.051 | 187.142 | 201.118 | 215.135 | 218.149 | 326.172 | 341.152 | 392.243 <sup>+2</sup> | 401.208 | 460.286 | 568.251 <sup>+2</sup> | 658.356            | 658.850 | 713.865 <sup>+2</sup> | 722.842 <sup>+2</sup> | 772.393 <sup>+2</sup> | 785.428 <sup>+2</sup> | 801.438 | 914.449 | 1315.694 |
|-------------------------|--------|--------|--------|--------|--------|---------|---------|---------|---------|---------|---------|---------|-----------------------|---------|---------|-----------------------|--------------------|---------|-----------------------|-----------------------|-----------------------|-----------------------|---------|---------|----------|
| Frac. Inten. (% of TIC) | 0.00   | 0.22   | 7.79   | 0.20   | 0.21   | 3.43    | 14.15   | 2.71    | 5.75    | 2.05    | 2.19    | 4.21    | 3.83                  | 2.41    | 2.38    | 2.13                  | 14.26              | 4.75    | 2.86                  | 4.91                  | 2.06                  | 3.81                  | 7.21    | 2.38    | 4.11     |
| Rel. Inten. (% of BP)   | 0.03   | 1.55   | 54.66  | 1.38   | 1.50   | 24.09   | 99.23   | 18.98   | 40.31   | 14.40   | 15.35   | 29.53   | 26.83                 | 16.93   | 16.72   | 14.91                 | 100.00             | 33.31   | 20.05                 | 34.42                 | 14.46                 | 26.71                 | 50.57   | 16.66   | 28.85    |
| Score                   | 0.20   | 0.50   | 1.50   | 0.50   | 0.22   | -0.24   | 0.50    | 0.50    | 0.75    | 1.50    | 0.75    | -0.30   | -0.27                 | 0.75    | 1.50    | -0.15                 | 1.50               | -0.33   | 0.50                  | 1.50                  | 1.50                  | -0.27                 | -0.51   | -0.17   | 1.50     |
| Ion-type                | PR     | V      | a1     | KQ     | LI     |         | a2      | y2-NH3  | b2      | y2      | VEP     | GKT     | y3                    |         |         |                       | y <sup>++</sup> 11 |         | y12-H2O <sup>+2</sup> | y12 <sup>+2</sup>     | y13 <sup>+2</sup>     |                       |         |         | y11      |
| Delta ppm               | 6.8    | -26.0  | -43.7  | 22.9   | -30.5  |         | -15.5   | -28.2   | -25.2   | -3.7    | -0.8    |         |                       | -19.5   | -3.9    |                       | 15.0               |         | 3.6                   | -35.2                 | -11.5                 |                       |         |         | 6.9      |

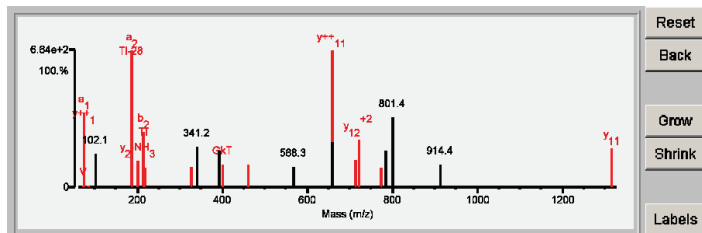

Result Summary

| Rank | Score | SPI (%) | BCS | # Unmatched Ions | Variable sites | Sequence                   | MH <sup>+</sup> Calculated (Da) | MH <sup>+</sup> Error (Da) | MH <sup>+</sup> Error (ppm) | Protein MW/pi (Da) | Species | Accession # | Protein Name                                                         |
|------|-------|---------|-----|------------------|----------------|----------------------------|---------------------------------|----------------------------|-----------------------------|--------------------|---------|-------------|----------------------------------------------------------------------|
| 1    | 23.06 | 96.9    | 11  | 1/25             | K27k           | (K)TITLVEPESDTIENVKAK(I)   | 1987.0594                       | 114.0494                   | 3.1                         | 8564.9/6.56        | HUMAN   | P62988      | Ubiquitin OS=Homo sapiens GN=RPS27A PE=1 SV=1                        |
| 2    | 20.49 | 94.8    | 9   | 2/25             | K29k           | (K)TITLVEPESDTIENVKAK(I)   | 1987.0594                       | 114.0494                   | 3.1                         | 8564.9/6.56        | HUMAN   | P62988      | Ubiquitin OS=Homo sapiens GN=RPS27A PE=1 SV=1                        |
| 3    | 11.89 | 70.6    | 5   | 11/25            | None           | (K)GPVLCMKGGQTLNELVENAK(S) | 2101.0780                       | 0.0307                     | 14.6                        | 128881.4/6.74      | HUMAN   | RQZ7392     | REVERSE UPF0636 protein C4orf41 OS=Homo sapiens GN=C4orf41 PE=1 SV=2 |
| 4    | 9.24  | 59.7    | 5   | 13/25            | None           | (R)LTIEDELQVLEAKLEEK(E)    | 2101.1275                       | -0.0187                    | -8.9                        | 22449.2/5.45       | HUMAN   | RQ16890     | REVERSE Tumor protein D53 OS=Homo sapiens GN=TPD52L1 PE=1 SV=1       |
| 5    | 8.69  | 72.0    | 1   | 9/25             | K50k           | (K)AKVNEITDSPEVELTITK(G)   | 1987.0594                       | 114.0494                   | 3.1                         | 8564.9/6.80        | HUMAN   | RP62988     | REVERSE Ubiquitin OS=Homo sapiens GN=RPS27A PE=1 SV=1                |

Detailed Results

| Rank                                                                                                                                                                                                                                                                                                                                                                                                                                                                                                                                                                                                                                                                                                                                                                                                                                                                                                                                                                                                                                                                                                                                                                                                                                                                                                                                                                                                                                                                                                                                                                                                                                                                                                                                                                                                                                                                                                                                                                                                                                                                                                                                                                                                                                                                                                                                                                                                                                                                                                                                                                                                                                                                                                                                                                                                                                                                | Score  | SPI (%) | BCS            | # Unmatched Ions | Variable sites | Sequence                 | MH <sup>+</sup> Calculated (Da) | MH <sup>+</sup> Error (Da) | MH <sup>+</sup> Error (ppm) | Protein MW/pi (Da) | Species                          | Accession # | MS-Digest Index #     | Protein Name                                  |                    |         |                               |                |                                                 |                               |                |                   |                |                               |                 |         |         |         |         |         |         |                       |         |                       |                       |         |         |         |                       |          |                        |      |      |      |      |      |       |      |      |      |      |      |      |      |      |      |      |       |      |      |      |      |      |      |      |      |                      |      |      |      |      |      |        |       |       |      |      |      |      |       |      |      |       |       |      |      |      |       |      |      |       |       |       |      |      |      |      |      |      |       |      |      |      |      |      |      |      |      |      |      |      |      |      |      |      |      |      |      |          |    |   |                |    |    |                |  |                |                |    |                                  |     |                       |                                 |                |  |                               |                |                                                 |                               |                |                   |                |                               |                 |           |       |       |       |       |      |       |  |       |       |      |       |      |      |      |       |      |      |      |      |       |     |      |       |      |      |
|---------------------------------------------------------------------------------------------------------------------------------------------------------------------------------------------------------------------------------------------------------------------------------------------------------------------------------------------------------------------------------------------------------------------------------------------------------------------------------------------------------------------------------------------------------------------------------------------------------------------------------------------------------------------------------------------------------------------------------------------------------------------------------------------------------------------------------------------------------------------------------------------------------------------------------------------------------------------------------------------------------------------------------------------------------------------------------------------------------------------------------------------------------------------------------------------------------------------------------------------------------------------------------------------------------------------------------------------------------------------------------------------------------------------------------------------------------------------------------------------------------------------------------------------------------------------------------------------------------------------------------------------------------------------------------------------------------------------------------------------------------------------------------------------------------------------------------------------------------------------------------------------------------------------------------------------------------------------------------------------------------------------------------------------------------------------------------------------------------------------------------------------------------------------------------------------------------------------------------------------------------------------------------------------------------------------------------------------------------------------------------------------------------------------------------------------------------------------------------------------------------------------------------------------------------------------------------------------------------------------------------------------------------------------------------------------------------------------------------------------------------------------------------------------------------------------------------------------------------------------|--------|---------|----------------|------------------|----------------|--------------------------|---------------------------------|----------------------------|-----------------------------|--------------------|----------------------------------|-------------|-----------------------|-----------------------------------------------|--------------------|---------|-------------------------------|----------------|-------------------------------------------------|-------------------------------|----------------|-------------------|----------------|-------------------------------|-----------------|---------|---------|---------|---------|---------|---------|-----------------------|---------|-----------------------|-----------------------|---------|---------|---------|-----------------------|----------|------------------------|------|------|------|------|------|-------|------|------|------|------|------|------|------|------|------|------|-------|------|------|------|------|------|------|------|------|----------------------|------|------|------|------|------|--------|-------|-------|------|------|------|------|-------|------|------|-------|-------|------|------|------|-------|------|------|-------|-------|-------|------|------|------|------|------|------|-------|------|------|------|------|------|------|------|------|------|------|------|------|------|------|------|------|------|------|----------|----|---|----------------|----|----|----------------|--|----------------|----------------|----|----------------------------------|-----|-----------------------|---------------------------------|----------------|--|-------------------------------|----------------|-------------------------------------------------|-------------------------------|----------------|-------------------|----------------|-------------------------------|-----------------|-----------|-------|-------|-------|-------|------|-------|--|-------|-------|------|-------|------|------|------|-------|------|------|------|------|-------|-----|------|-------|------|------|
| 1                                                                                                                                                                                                                                                                                                                                                                                                                                                                                                                                                                                                                                                                                                                                                                                                                                                                                                                                                                                                                                                                                                                                                                                                                                                                                                                                                                                                                                                                                                                                                                                                                                                                                                                                                                                                                                                                                                                                                                                                                                                                                                                                                                                                                                                                                                                                                                                                                                                                                                                                                                                                                                                                                                                                                                                                                                                                   | 23.06  | 96.9    | 11             | 1/25             | K27k           | (K)TITLVEPESDTIENVKAK(I) | 1987.0594                       | 114.0494                   | 3.1                         | 8564.9/6.56        | HUMAN                            | P62988      | 814891                | Ubiquitin OS=Homo sapiens GN=RPS27A PE=1 SV=1 |                    |         |                               |                |                                                 |                               |                |                   |                |                               |                 |         |         |         |         |         |         |                       |         |                       |                       |         |         |         |                       |          |                        |      |      |      |      |      |       |      |      |      |      |      |      |      |      |      |      |       |      |      |      |      |      |      |      |      |                      |      |      |      |      |      |        |       |       |      |      |      |      |       |      |      |       |       |      |      |      |       |      |      |       |       |       |      |      |      |      |      |      |       |      |      |      |      |      |      |      |      |      |      |      |      |      |      |      |      |      |      |          |    |   |                |    |    |                |  |                |                |    |                                  |     |                       |                                 |                |  |                               |                |                                                 |                               |                |                   |                |                               |                 |           |       |       |       |       |      |       |  |       |       |      |       |      |      |      |       |      |      |      |      |       |     |      |       |      |      |
| <table border="1"> <thead> <tr> <th>Fragment-ion (m/z)</th> <th>70.064</th> <th>72.079</th> <th>74.060</th> <th>84.078</th> <th>86.096</th> <th>187.142</th> <th>188.145</th> <th>215.136</th> <th>218.146</th> <th>229.118</th> <th>298.173</th> <th>316.186</th> <th>344.182</th> <th>425.238</th> <th>443.249</th> <th>460.287</th> <th>658.346<sup>+2</sup></th> <th>673.398</th> <th>713.857<sup>+2</sup></th> <th>772.390<sup>+2</sup></th> <th>802.442</th> <th>836.917</th> <th>915.517</th> <th>943.987<sup>+2</sup></th> <th>1315.682</th> </tr> </thead> <tbody> <tr> <td>Frac. Inten.(% of TIC)</td> <td>0.00</td> <td>0.06</td> <td>2.58</td> <td>0.16</td> <td>0.22</td> <td>28.57</td> <td>3.13</td> <td>8.48</td> <td>2.06</td> <td>1.76</td> <td>1.78</td> <td>2.52</td> <td>3.77</td> <td>1.68</td> <td>2.42</td> <td>3.64</td> <td>10.44</td> <td>2.30</td> <td>2.62</td> <td>1.73</td> <td>5.42</td> <td>1.65</td> <td>1.60</td> <td>5.45</td> <td>5.96</td> </tr> <tr> <td>Rel. Inten.(% of BP)</td> <td>0.01</td> <td>0.23</td> <td>9.02</td> <td>0.57</td> <td>0.76</td> <td>100.00</td> <td>10.94</td> <td>29.69</td> <td>7.23</td> <td>6.17</td> <td>6.22</td> <td>8.80</td> <td>13.19</td> <td>5.87</td> <td>8.47</td> <td>12.73</td> <td>36.53</td> <td>8.04</td> <td>9.16</td> <td>6.04</td> <td>18.98</td> <td>5.77</td> <td>5.59</td> <td>19.08</td> <td>20.85</td> </tr> <tr> <td>Score</td> <td>0.20</td> <td>0.50</td> <td>1.50</td> <td>0.50</td> <td>0.22</td> <td>0.50</td> <td>-0.11</td> <td>0.75</td> <td>1.50</td> <td>0.75</td> <td>0.25</td> <td>0.50</td> <td>0.75</td> <td>0.50</td> <td>0.75</td> <td>1.50</td> </tr> <tr> <td>Ion-type</td> <td>PR</td> <td>V</td> <td>a<sub>1</sub></td> <td>KQ</td> <td>LI</td> <td>a<sub>2</sub></td> <td></td> <td>b<sub>2</sub></td> <td>y<sub>2</sub></td> <td>VE</td> <td>b<sub>3</sub>-H<sub>2</sub>O</td> <td>TIE</td> <td>TLEV-H<sub>2</sub>O</td> <td>y<sub>3</sub>-NH<sub>3</sub></td> <td>y<sub>3</sub></td> <td></td> <td>y<sub>11</sub><sup>+2</sup></td> <td>y<sub>5</sub></td> <td>y<sub>12</sub>-H<sub>2</sub>O<sup>+2</sup></td> <td>y<sub>13</sub><sup>+2</sup></td> <td>y<sub>6</sub></td> <td>y<sup>++14</sup></td> <td>y<sub>7</sub></td> <td>y<sub>16</sub><sup>+2</sup></td> <td>y<sub>11</sub></td> </tr> <tr> <td>Delta ppm</td> <td>-20.3</td> <td>-21.9</td> <td>-20.8</td> <td>-29.4</td> <td>-9.6</td> <td>-15.0</td> <td></td> <td>-18.7</td> <td>-18.4</td> <td>-5.2</td> <td>-15.9</td> <td>-5.0</td> <td>-2.9</td> <td>-5.3</td> <td>-28.6</td> <td>-1.1</td> <td>-1.0</td> <td>-1.6</td> <td>-7.5</td> <td>-15.9</td> <td>0.8</td> <td>-7.5</td> <td>-10.1</td> <td>-1.8</td> <td>-2.1</td> </tr> </tbody> </table> |        |         |                |                  |                |                          |                                 |                            |                             |                    |                                  |             |                       |                                               | Fragment-ion (m/z) | 70.064  | 72.079                        | 74.060         | 84.078                                          | 86.096                        | 187.142        | 188.145           | 215.136        | 218.146                       | 229.118         | 298.173 | 316.186 | 344.182 | 425.238 | 443.249 | 460.287 | 658.346 <sup>+2</sup> | 673.398 | 713.857 <sup>+2</sup> | 772.390 <sup>+2</sup> | 802.442 | 836.917 | 915.517 | 943.987 <sup>+2</sup> | 1315.682 | Frac. Inten.(% of TIC) | 0.00 | 0.06 | 2.58 | 0.16 | 0.22 | 28.57 | 3.13 | 8.48 | 2.06 | 1.76 | 1.78 | 2.52 | 3.77 | 1.68 | 2.42 | 3.64 | 10.44 | 2.30 | 2.62 | 1.73 | 5.42 | 1.65 | 1.60 | 5.45 | 5.96 | Rel. Inten.(% of BP) | 0.01 | 0.23 | 9.02 | 0.57 | 0.76 | 100.00 | 10.94 | 29.69 | 7.23 | 6.17 | 6.22 | 8.80 | 13.19 | 5.87 | 8.47 | 12.73 | 36.53 | 8.04 | 9.16 | 6.04 | 18.98 | 5.77 | 5.59 | 19.08 | 20.85 | Score | 0.20 | 0.50 | 1.50 | 0.50 | 0.22 | 0.50 | -0.11 | 0.75 | 1.50 | 0.75 | 0.25 | 0.50 | 0.75 | 0.50 | 0.75 | 1.50 | 1.50 | 1.50 | 1.50 | 1.50 | 1.50 | 1.50 | 1.50 | 1.50 | 1.50 | Ion-type | PR | V | a <sub>1</sub> | KQ | LI | a <sub>2</sub> |  | b <sub>2</sub> | y <sub>2</sub> | VE | b <sub>3</sub> -H <sub>2</sub> O | TIE | TLEV-H <sub>2</sub> O | y <sub>3</sub> -NH <sub>3</sub> | y <sub>3</sub> |  | y <sub>11</sub> <sup>+2</sup> | y <sub>5</sub> | y <sub>12</sub> -H <sub>2</sub> O <sup>+2</sup> | y <sub>13</sub> <sup>+2</sup> | y <sub>6</sub> | y <sup>++14</sup> | y <sub>7</sub> | y <sub>16</sub> <sup>+2</sup> | y <sub>11</sub> | Delta ppm | -20.3 | -21.9 | -20.8 | -29.4 | -9.6 | -15.0 |  | -18.7 | -18.4 | -5.2 | -15.9 | -5.0 | -2.9 | -5.3 | -28.6 | -1.1 | -1.0 | -1.6 | -7.5 | -15.9 | 0.8 | -7.5 | -10.1 | -1.8 | -2.1 |
| Fragment-ion (m/z)                                                                                                                                                                                                                                                                                                                                                                                                                                                                                                                                                                                                                                                                                                                                                                                                                                                                                                                                                                                                                                                                                                                                                                                                                                                                                                                                                                                                                                                                                                                                                                                                                                                                                                                                                                                                                                                                                                                                                                                                                                                                                                                                                                                                                                                                                                                                                                                                                                                                                                                                                                                                                                                                                                                                                                                                                                                  | 70.064 | 72.079  | 74.060         | 84.078           | 86.096         | 187.142                  | 188.145                         | 215.136                    | 218.146                     | 229.118            | 298.173                          | 316.186     | 344.182               | 425.238                                       | 443.249            | 460.287 | 658.346 <sup>+2</sup>         | 673.398        | 713.857 <sup>+2</sup>                           | 772.390 <sup>+2</sup>         | 802.442        | 836.917           | 915.517        | 943.987 <sup>+2</sup>         | 1315.682        |         |         |         |         |         |         |                       |         |                       |                       |         |         |         |                       |          |                        |      |      |      |      |      |       |      |      |      |      |      |      |      |      |      |      |       |      |      |      |      |      |      |      |      |                      |      |      |      |      |      |        |       |       |      |      |      |      |       |      |      |       |       |      |      |      |       |      |      |       |       |       |      |      |      |      |      |      |       |      |      |      |      |      |      |      |      |      |      |      |      |      |      |      |      |      |      |          |    |   |                |    |    |                |  |                |                |    |                                  |     |                       |                                 |                |  |                               |                |                                                 |                               |                |                   |                |                               |                 |           |       |       |       |       |      |       |  |       |       |      |       |      |      |      |       |      |      |      |      |       |     |      |       |      |      |
| Frac. Inten.(% of TIC)                                                                                                                                                                                                                                                                                                                                                                                                                                                                                                                                                                                                                                                                                                                                                                                                                                                                                                                                                                                                                                                                                                                                                                                                                                                                                                                                                                                                                                                                                                                                                                                                                                                                                                                                                                                                                                                                                                                                                                                                                                                                                                                                                                                                                                                                                                                                                                                                                                                                                                                                                                                                                                                                                                                                                                                                                                              | 0.00   | 0.06    | 2.58           | 0.16             | 0.22           | 28.57                    | 3.13                            | 8.48                       | 2.06                        | 1.76               | 1.78                             | 2.52        | 3.77                  | 1.68                                          | 2.42               | 3.64    | 10.44                         | 2.30           | 2.62                                            | 1.73                          | 5.42           | 1.65              | 1.60           | 5.45                          | 5.96            |         |         |         |         |         |         |                       |         |                       |                       |         |         |         |                       |          |                        |      |      |      |      |      |       |      |      |      |      |      |      |      |      |      |      |       |      |      |      |      |      |      |      |      |                      |      |      |      |      |      |        |       |       |      |      |      |      |       |      |      |       |       |      |      |      |       |      |      |       |       |       |      |      |      |      |      |      |       |      |      |      |      |      |      |      |      |      |      |      |      |      |      |      |      |      |      |          |    |   |                |    |    |                |  |                |                |    |                                  |     |                       |                                 |                |  |                               |                |                                                 |                               |                |                   |                |                               |                 |           |       |       |       |       |      |       |  |       |       |      |       |      |      |      |       |      |      |      |      |       |     |      |       |      |      |
| Rel. Inten.(% of BP)                                                                                                                                                                                                                                                                                                                                                                                                                                                                                                                                                                                                                                                                                                                                                                                                                                                                                                                                                                                                                                                                                                                                                                                                                                                                                                                                                                                                                                                                                                                                                                                                                                                                                                                                                                                                                                                                                                                                                                                                                                                                                                                                                                                                                                                                                                                                                                                                                                                                                                                                                                                                                                                                                                                                                                                                                                                | 0.01   | 0.23    | 9.02           | 0.57             | 0.76           | 100.00                   | 10.94                           | 29.69                      | 7.23                        | 6.17               | 6.22                             | 8.80        | 13.19                 | 5.87                                          | 8.47               | 12.73   | 36.53                         | 8.04           | 9.16                                            | 6.04                          | 18.98          | 5.77              | 5.59           | 19.08                         | 20.85           |         |         |         |         |         |         |                       |         |                       |                       |         |         |         |                       |          |                        |      |      |      |      |      |       |      |      |      |      |      |      |      |      |      |      |       |      |      |      |      |      |      |      |      |                      |      |      |      |      |      |        |       |       |      |      |      |      |       |      |      |       |       |      |      |      |       |      |      |       |       |       |      |      |      |      |      |      |       |      |      |      |      |      |      |      |      |      |      |      |      |      |      |      |      |      |      |          |    |   |                |    |    |                |  |                |                |    |                                  |     |                       |                                 |                |  |                               |                |                                                 |                               |                |                   |                |                               |                 |           |       |       |       |       |      |       |  |       |       |      |       |      |      |      |       |      |      |      |      |       |     |      |       |      |      |
| Score                                                                                                                                                                                                                                                                                                                                                                                                                                                                                                                                                                                                                                                                                                                                                                                                                                                                                                                                                                                                                                                                                                                                                                                                                                                                                                                                                                                                                                                                                                                                                                                                                                                                                                                                                                                                                                                                                                                                                                                                                                                                                                                                                                                                                                                                                                                                                                                                                                                                                                                                                                                                                                                                                                                                                                                                                                                               | 0.20   | 0.50    | 1.50           | 0.50             | 0.22           | 0.50                     | -0.11                           | 0.75                       | 1.50                        | 0.75               | 0.25                             | 0.50        | 0.75                  | 0.50                                          | 0.75               | 1.50    | 1.50                          | 1.50           | 1.50                                            | 1.50                          | 1.50           | 1.50              | 1.50           | 1.50                          | 1.50            |         |         |         |         |         |         |                       |         |                       |                       |         |         |         |                       |          |                        |      |      |      |      |      |       |      |      |      |      |      |      |      |      |      |      |       |      |      |      |      |      |      |      |      |                      |      |      |      |      |      |        |       |       |      |      |      |      |       |      |      |       |       |      |      |      |       |      |      |       |       |       |      |      |      |      |      |      |       |      |      |      |      |      |      |      |      |      |      |      |      |      |      |      |      |      |      |          |    |   |                |    |    |                |  |                |                |    |                                  |     |                       |                                 |                |  |                               |                |                                                 |                               |                |                   |                |                               |                 |           |       |       |       |       |      |       |  |       |       |      |       |      |      |      |       |      |      |      |      |       |     |      |       |      |      |
| Ion-type                                                                                                                                                                                                                                                                                                                                                                                                                                                                                                                                                                                                                                                                                                                                                                                                                                                                                                                                                                                                                                                                                                                                                                                                                                                                                                                                                                                                                                                                                                                                                                                                                                                                                                                                                                                                                                                                                                                                                                                                                                                                                                                                                                                                                                                                                                                                                                                                                                                                                                                                                                                                                                                                                                                                                                                                                                                            | PR     | V       | a <sub>1</sub> | KQ               | LI             | a <sub>2</sub>           |                                 | b <sub>2</sub>             | y <sub>2</sub>              | VE                 | b <sub>3</sub> -H <sub>2</sub> O | TIE         | TLEV-H <sub>2</sub> O | y <sub>3</sub> -NH <sub>3</sub>               | y <sub>3</sub>     |         | y <sub>11</sub> <sup>+2</sup> | y <sub>5</sub> | y <sub>12</sub> -H <sub>2</sub> O <sup>+2</sup> | y <sub>13</sub> <sup>+2</sup> | y <sub>6</sub> | y <sup>++14</sup> | y <sub>7</sub> | y <sub>16</sub> <sup>+2</sup> | y <sub>11</sub> |         |         |         |         |         |         |                       |         |                       |                       |         |         |         |                       |          |                        |      |      |      |      |      |       |      |      |      |      |      |      |      |      |      |      |       |      |      |      |      |      |      |      |      |                      |      |      |      |      |      |        |       |       |      |      |      |      |       |      |      |       |       |      |      |      |       |      |      |       |       |       |      |      |      |      |      |      |       |      |      |      |      |      |      |      |      |      |      |      |      |      |      |      |      |      |      |          |    |   |                |    |    |                |  |                |                |    |                                  |     |                       |                                 |                |  |                               |                |                                                 |                               |                |                   |                |                               |                 |           |       |       |       |       |      |       |  |       |       |      |       |      |      |      |       |      |      |      |      |       |     |      |       |      |      |
| Delta ppm                                                                                                                                                                                                                                                                                                                                                                                                                                                                                                                                                                                                                                                                                                                                                                                                                                                                                                                                                                                                                                                                                                                                                                                                                                                                                                                                                                                                                                                                                                                                                                                                                                                                                                                                                                                                                                                                                                                                                                                                                                                                                                                                                                                                                                                                                                                                                                                                                                                                                                                                                                                                                                                                                                                                                                                                                                                           | -20.3  | -21.9   | -20.8          | -29.4            | -9.6           | -15.0                    |                                 | -18.7                      | -18.4                       | -5.2               | -15.9                            | -5.0        | -2.9                  | -5.3                                          | -28.6              | -1.1    | -1.0                          | -1.6           | -7.5                                            | -15.9                         | 0.8            | -7.5              | -10.1          | -1.8                          | -2.1            |         |         |         |         |         |         |                       |         |                       |                       |         |         |         |                       |          |                        |      |      |      |      |      |       |      |      |      |      |      |      |      |      |      |      |       |      |      |      |      |      |      |      |      |                      |      |      |      |      |      |        |       |       |      |      |      |      |       |      |      |       |       |      |      |      |       |      |      |       |       |       |      |      |      |      |      |      |       |      |      |      |      |      |      |      |      |      |      |      |      |      |      |      |      |      |      |          |    |   |                |    |    |                |  |                |                |    |                                  |     |                       |                                 |                |  |                               |                |                                                 |                               |                |                   |                |                               |                 |           |       |       |       |       |      |       |  |       |       |      |       |      |      |      |       |      |      |      |      |       |     |      |       |      |      |

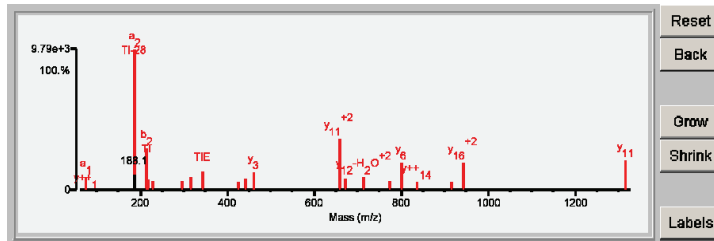

Result Summary

| Rank | Score | SPI (%) | BCS | # Unmatched Ions | Variable sites | Sequence                     | MH <sup>+</sup> Calculated (Da) | MH <sup>+</sup> Error (Da) | MH <sup>+</sup> Error (ppm) | Protein MWpl (Da) | Species | Accession # | Protein Name                                                                          |
|------|-------|---------|-----|------------------|----------------|------------------------------|---------------------------------|----------------------------|-----------------------------|-------------------|---------|-------------|---------------------------------------------------------------------------------------|
| 1    | 17.15 | 91.6    | 6   | 3/24             | K27k K33k      | (K)TITLVEPSDTIENVKAKIQDK(E)  | 2471.3239                       | 228.1114                   | 9.5                         | 8564.9/6.56       | HUMAN   | P62988      | Ubiquitin OS=Homo sapiens GN=RPS27A PE=1 SV=1                                         |
| 1    | 17.15 | 91.6    | 6   | 3/24             | K27k K29k      | (K)TITLVEPSDTIENVKAKIQDK(E)  | 2471.3239                       | 228.1114                   | 9.5                         | 8564.9/6.56       | HUMAN   | P62988      | Ubiquitin OS=Homo sapiens GN=RPS27A PE=1 SV=1                                         |
| 2    | 15.55 | 88.6    | 5   | 4/24             | K29k K33k      | (K)TITLVEPSDTIENVKAKIQDK(E)  | 2471.3239                       | 228.1114                   | 9.5                         | 8564.9/6.56       | HUMAN   | P62988      | Ubiquitin OS=Homo sapiens GN=RPS27A PE=1 SV=1                                         |
| 3    | 7.32  | 68.1    | 2   | 11/24            | K751k          | (K)ERMAKARTELANAKELLTLNGK(T) | 2585.4443                       | 113.9910                   | -19.2                       | 133100.3/4.87     | HUMAN   | RQ9JUL68    | REVERSE Myelin transcription factor 1-like protein OS=Homo sapiens GN=MYT1L PE=2 SV=2 |
| 4    | 7.21  | 55.6    | 2   | 10/24            | M485m K497k    | (R)MQLQRAELVGNKAGEVLDINK(R)  | 2569.4130                       | 130.0223                   | -5.7                        | 80152.2/8.93      | HUMAN   | RQ9IWA5     | REVERSE Choline transporter-like protein 2 OS=Homo sapiens GN=SLC4A2 PE=1 SV=2        |

Detailed Results

| Rank | Score | SPI (%) | BCS | # Unmatched Ions | Variable sites | Sequence                    | MH <sup>+</sup> Calculated (Da) | MH <sup>+</sup> Error (Da) | MH <sup>+</sup> Error (ppm) | Protein MWpl (Da) | Species | Accession # | MS-Digest Index # | Protein Name                                  |
|------|-------|---------|-----|------------------|----------------|-----------------------------|---------------------------------|----------------------------|-----------------------------|-------------------|---------|-------------|-------------------|-----------------------------------------------|
| 1    | 17.15 | 91.6    | 6   | 3/24             | K27k K33k      | (K)TITLVEPSDTIENVKAKIQDK(E) | 2471.3239                       | 228.1114                   | 9.5                         | 8564.9/6.56       | HUMAN   | P62988      | 814891            | Ubiquitin OS=Homo sapiens GN=RPS27A PE=1 SV=1 |

  

| Fragment-Ion (m/z)      | 70.064 | 72.080 | 84.043                           | 84.080 | 86.095 | 102.053        | 183.110 | 187.143        | 188.147 | 215.141        | 243.135 | 344.180 | 529.811 <sup>+2</sup>        | 540.307                          | 556.333 | 638.668 <sup>+3</sup>         | 639.353                          | 655.330 | 807.946 <sup>+2</sup>         | 816.449        | 864.495 | 957.503 <sup>+2</sup>         | 1013.515 <sup>+2</sup>                         | 1058.597       |
|-------------------------|--------|--------|----------------------------------|--------|--------|----------------|---------|----------------|---------|----------------|---------|---------|------------------------------|----------------------------------|---------|-------------------------------|----------------------------------|---------|-------------------------------|----------------|---------|-------------------------------|------------------------------------------------|----------------|
| Frac. Inten. (% of TIC) | 0.01   | 0.16   | 0.11                             | 0.19   | 0.44   | 0.15           | 2.03    | 30.46          | 3.74    | 7.04           | 2.20    | 2.89    | 1.86                         | 4.40                             | 2.90    | 5.80                          | 4.17                             | 2.40    | 2.26                          | 3.05           | 2.61    | 16.78                         | 2.54                                           | 1.82           |
| Rel. Inten. (% of BP)   | 0.02   | 0.52   | 0.37                             | 0.62   | 1.43   | 0.50           | 6.66    | 100.00         | 12.28   | 23.12          | 7.22    | 9.49    | 6.11                         | 14.44                            | 9.52    | 19.03                         | 13.69                            | 7.88    | 7.43                          | 10.02          | 8.56    | 55.09                         | 8.33                                           | 5.96           |
| Score                   | 0.20   | 0.50   | 1.00                             | 0.50   | 0.22   | 1.00           | -0.07   | 0.50           | -0.12   | 0.75           | 0.75    | 0.75    | 1.50                         | 0.25                             | 0.75    | 1.50                          | 0.25                             | 0.75    | 1.50                          | 1.50           | -0.09   | 1.50                          | 0.50                                           | 1.50           |
| Ion-type                | PR     | V      | b <sub>1</sub> -H <sub>2</sub> O | KQ     | LI     | b <sub>1</sub> |         | a <sub>2</sub> |         | b <sub>2</sub> | IE      | TIE     | y <sub>7</sub> <sup>+2</sup> | b <sub>5</sub> -H <sub>2</sub> O | ITLEV   | y <sub>15</sub> <sup>+3</sup> | b <sub>6</sub> -H <sub>2</sub> O | LEVEPS  | y <sub>12</sub> <sup>+2</sup> | y <sub>6</sub> |         | y <sub>15</sub> <sup>+2</sup> | y <sub>16</sub> -NH <sub>3</sub> <sup>+2</sup> | y <sub>7</sub> |
| Delta ppm               | -8.9   | -12.1  | -28.4                            | -5.7   | -11.9  | -27.0          |         | -13.9          |         | 2.2            | 0.3     | -7.0    | 17.4                         | 5.0                              | -3.8    | -2.5                          | -30.2                            | -1.1    | 2.6                           | -10.0          |         | 3.6                           | 7.2                                            | 1.4            |

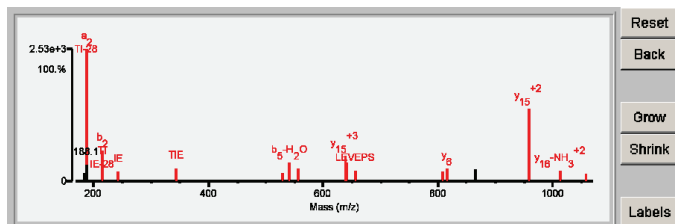

| Rank | Score | SPI (%) | BCS | # Unmatched Ions | Variable sites | Sequence                    | MH <sup>+</sup> Calculated (Da) | MH <sup>+</sup> Error (Da) | MH <sup>+</sup> Error (ppm) | Protein MWpl (Da) | Species | Accession # | MS-Digest Index # | Protein Name                                  |
|------|-------|---------|-----|------------------|----------------|-----------------------------|---------------------------------|----------------------------|-----------------------------|-------------------|---------|-------------|-------------------|-----------------------------------------------|
| 1    | 17.15 | 91.6    | 6   | 3/24             | K27k K29k      | (K)TITLVEPSDTIENVKAKIQDK(E) | 2471.3239                       | 228.1114                   | 9.5                         | 8564.9/6.56       | HUMAN   | P62988      | 814891            | Ubiquitin OS=Homo sapiens GN=RPS27A PE=1 SV=1 |

  

| Fragment-Ion (m/z)      | 70.064 | 72.080 | 84.043                           | 84.080 | 86.095 | 102.053        | 183.110 | 187.143        | 188.147 | 215.141        | 243.135 | 344.180 | 529.811 <sup>+2</sup>        | 540.307                          | 556.333 | 638.668 <sup>+3</sup>         | 639.353                          | 655.330 | 807.946 <sup>+2</sup>         | 816.449        | 864.495 | 957.503 <sup>+2</sup>         | 1013.515 <sup>+2</sup>                         | 1058.597       |
|-------------------------|--------|--------|----------------------------------|--------|--------|----------------|---------|----------------|---------|----------------|---------|---------|------------------------------|----------------------------------|---------|-------------------------------|----------------------------------|---------|-------------------------------|----------------|---------|-------------------------------|------------------------------------------------|----------------|
| Frac. Inten. (% of TIC) | 0.01   | 0.16   | 0.11                             | 0.19   | 0.44   | 0.15           | 2.03    | 30.46          | 3.74    | 7.04           | 2.20    | 2.89    | 1.86                         | 4.40                             | 2.90    | 5.80                          | 4.17                             | 2.40    | 2.26                          | 3.05           | 2.61    | 16.78                         | 2.54                                           | 1.82           |
| Rel. Inten. (% of BP)   | 0.02   | 0.52   | 0.37                             | 0.62   | 1.43   | 0.50           | 6.66    | 100.00         | 12.28   | 23.12          | 7.22    | 9.49    | 6.11                         | 14.44                            | 9.52    | 19.03                         | 13.69                            | 7.88    | 7.43                          | 10.02          | 8.56    | 55.09                         | 8.33                                           | 5.96           |
| Score                   | 0.20   | 0.50   | 1.00                             | 0.50   | 0.22   | 1.00           | -0.07   | 0.50           | -0.12   | 0.75           | 0.75    | 0.75    | 1.50                         | 0.25                             | 0.75    | 1.50                          | 0.25                             | 0.75    | 1.50                          | 1.50           | -0.09   | 1.50                          | 0.50                                           | 1.50           |
| Ion-type                | PR     | V      | b <sub>1</sub> -H <sub>2</sub> O | KQ     | LI     | b <sub>1</sub> |         | a <sub>2</sub> |         | b <sub>2</sub> | IE      | TIE     | y <sub>7</sub> <sup>+2</sup> | b <sub>5</sub> -H <sub>2</sub> O | kak     | y <sub>15</sub> <sup>+3</sup> | b <sub>6</sub> -H <sub>2</sub> O | LEVEPS  | y <sub>12</sub> <sup>+2</sup> | y <sub>6</sub> |         | y <sub>15</sub> <sup>+2</sup> | y <sub>16</sub> -NH <sub>3</sub> <sup>+2</sup> | y <sub>7</sub> |
| Delta ppm               | -8.9   | -12.1  | -28.4                            | -5.7   | -11.9  | -27.0          |         | -13.9          |         | 2.2            | 0.3     | -7.0    | 17.4                         | 5.0                              | 21.3    | -2.5                          | -30.2                            | -1.1    | 2.6                           | -10.0          |         | 3.6                           | 7.2                                            | 1.4            |

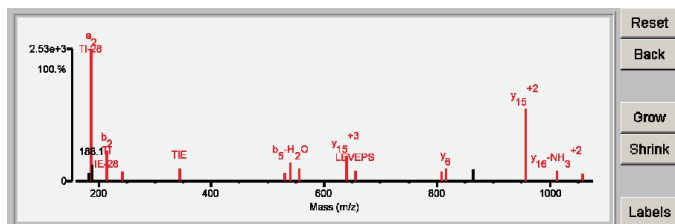



Result Summary

| Rank | Score | SPI (%) | BCS | # Unmatched Ions | Variable sites | Sequence                 | MH <sup>+</sup> Calculated (Da) | MH <sup>+</sup> Error (Da) | MH <sup>+</sup> Error (ppm) | Protein MW/pl (Da) | Species | Accession # | Protein Name                                                                 |
|------|-------|---------|-----|------------------|----------------|--------------------------|---------------------------------|----------------------------|-----------------------------|--------------------|---------|-------------|------------------------------------------------------------------------------|
| 1    | 14.69 | 84.2    | 6   | 9/25             | K29k           | (K)AKIQDKEGIPPDQQR(L)    | 1722.9133                       | 114.0232                   | -10.7                       | 8564.9/6.56        | HUMAN   | P62988      | Ubiquitin OS=Homo sapiens GN=RPS27A PE=1 SV=1                                |
| 2    | 13.14 | 82.4    | 5   | 10/25            | K33k           | (K)AKIQDKEGIPPDQQR(L)    | 1722.9133                       | 114.0232                   | -10.7                       | 8564.9/6.56        | HUMAN   | P62988      | Ubiquitin OS=Homo sapiens GN=RPS27A PE=1 SV=1                                |
| 3    | 8.11  | 74.2    | 2   | 15/25            | M324m K332k    | (R)HHLVGAAAGmAGGHPSTk(G) | 1706.8635                       | 130.0731                   | 4382.0                      | 87928.2/9.72       | HUMAN   | RQ6ZVC0     | REVERSE Uncharacterized protein C7orf51 OS=Homo sapiens GN=C7orf51 PE=1 SV=1 |
| 4    | 5.60  | 73.0    | 1   | 16/25            | None           | (R)GRGSDPTGVTLSNKYR(K)   | 1836.9199                       | 0.0167                     | 9.1                         | 45501.6/9.29       | HUMAN   | RO43581     | REVERSE Synaptotagmin-7 OS=Homo sapiens GN=SYT7 PE=1 SV=3                    |
| 5    | 5.45  | 59.6    | 2   | 17/25            | M98m K94k      | (K)QlkFYRmRHHYK(S)       | 1706.9060                       | 130.0305                   | -4.0                        | 28192.8/6.49       | HUMAN   | Q8WWD3      | E3 ubiquitin-protein ligase RNF138 OS=Homo sapiens GN=RNF138 PE=1 SV=1       |

Detailed Results

| Rank | Score | SPI (%) | BCS | # Unmatched Ions | Variable sites | Sequence                              | MH <sup>+</sup> Calculated (Da) | MH <sup>+</sup> Error (Da) | MH <sup>+</sup> Error (ppm) | Protein MW/pl (Da) | Species | Accession # | MS-Digest Index # | Protein Name                                  |
|------|-------|---------|-----|------------------|----------------|---------------------------------------|---------------------------------|----------------------------|-----------------------------|--------------------|---------|-------------|-------------------|-----------------------------------------------|
| 1    | 14.69 | 84.2    | 6   | 9/25             | K29k           | (K) A K I Q D K E G I P P D Q Q R (L) | 1722.9133                       | 114.0232                   | -10.7                       | 8564.9/6.56        | HUMAN   | P62988      | 814891            | Ubiquitin OS=Homo sapiens GN=RPS27A PE=1 SV=1 |

  

| Fragment-ion (m/z)     | 70.064 | 84.078 | 86.096 | 143.116 | 187.071 | 243.142 | 271.140 | 310.140 | 322.161*2         | 357.173 | 357.233 | 369.678*2 | 370.687*2 | 409.233*2 | 431.231        | 455.166*2 | 492.751*2         | 546.256        | 584.300                         | 626.298                         | 643.304                         | 723.353                         | 740.367                         | 909.421                         | 984.466 |
|------------------------|--------|--------|--------|---------|---------|---------|---------|---------|-------------------|---------|---------|-----------|-----------|-----------|----------------|-----------|-------------------|----------------|---------------------------------|---------------------------------|---------------------------------|---------------------------------|---------------------------------|---------------------------------|---------|
| Frac. Inten.(% of TIC) | 0.00   | 0.11   | 0.40   | 2.46    | 1.98    | 1.77    | 1.70    | 1.35    | 7.18              | 1.34    | 1.69    | 1.18      | 33.00     | 2.32      | 2.43           | 1.62      | 1.31              | 2.34           | 1.77                            | 1.60                            | 7.55                            | 1.28                            | 20.58                           | 1.20                            | 1.86    |
| Rel. Inten.(% of BP)   | 0.00   | 0.34   | 1.21   | 7.45    | 5.99    | 5.36    | 5.15    | 4.09    | 21.76             | 4.06    | 5.12    | 3.57      | 100.00    | 7.03      | 7.36           | 4.90      | 3.97              | 7.08           | 5.37                            | 4.83                            | 22.89                           | 3.89                            | 62.35                           | 3.63                            | 5.64    |
| Score                  | 0.20   | 0.50   | 0.22   | -0.07   | 0.75    | -0.05   | -0.05   | 0.75    | 1.50              | 0.75    | -0.05   | -0.04     | 1.50      | -0.07     | 1.50           | -0.05     | 0.50              | 1.50           | 1.50                            | 0.50                            | 1.50                            | 0.50                            | 1.50                            | -0.04                           | -0.06   |
| Ion-type               | PR     | KQ     | L1     |         | EG      |         |         | PPD     | y <sup>5</sup> -2 |         |         |           |           |           | y <sup>3</sup> |           | b <sup>8</sup> -2 | y <sup>4</sup> | y <sup>5</sup> -NH <sub>2</sub> | y <sup>5</sup> -NH <sub>2</sub> | y <sup>5</sup> -NH <sub>2</sub> | y <sup>6</sup> -NH <sub>2</sub> | y <sup>6</sup> -NH <sub>2</sub> | y <sup>6</sup> -NH <sub>2</sub> |         |
| Delta ppm              | -21.8  | -36.6  | -10.8  |         | -8.2    |         |         | -4.0    | -2.6              |         |         |           |           |           | -13.0          |           | -17.3             | -13.1          | -15.5                           | 13.5                            | -18.8                           | 15.0                            | -1.9                            |                                 |         |

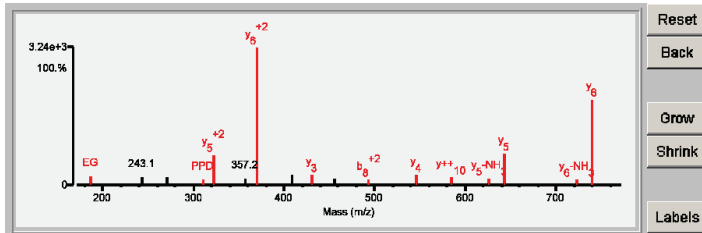

Result Summary

| Rank | Score | SPI (%) | BCS | # Unmatched ions | Variable sites | Sequence              | MH <sup>+</sup> Calculated (Da) | MH <sup>+</sup> Error (Da) | MH <sup>+</sup> Error (ppm) | Protein MW (Da) | Species | Accession # | Protein Name                                                                   |
|------|-------|---------|-----|------------------|----------------|-----------------------|---------------------------------|----------------------------|-----------------------------|-----------------|---------|-------------|--------------------------------------------------------------------------------|
| 1    | 10.01 | 62.4    | 5   | 13/25            | K29k K33k      | (K)AHIQDKEGIPDPQQR(L) | 1722.9133                       | 228.0820                   | -2.0                        | 8564.916.56     | HUMAN   | P62988      | Ubiquitin OS=Homo sapiens GN=RPS27A PE=1 SV=1                                  |
| 2    | 4.82  | 50.8    | 1   | 15/25            | K15k           | (R)CDIAKPTPMQARRHR(L) | 1836.9432                       | 114.0522                   | 4.7                         | 163847.716.88   | HUMAN   | RO75064     | REVERSE DENN domain-containing protein 4B OS=Homo sapiens GN=DENND4B PE=1 SV=4 |
| 2    | 4.82  | 50.8    | 1   | 15/25            | K1482k         | (R)HRRRAQMPTKADCR(K)  | 1836.9432                       | 114.0522                   | 4.7                         | 163847.716.86   | HUMAN   | O75064      | DENN domain-containing protein 4B OS=Homo sapiens GN=DENND4B PE=1 SV=4         |

Detailed Results

| Rank                    | Score | SPI (%) | BCS | # Unmatched ions | Variable sites | Sequence                                 | MH <sup>+</sup> Calculated (Da) | MH <sup>+</sup> Error (Da) | MH <sup>+</sup> Error (ppm) | Protein MW (Da) | Species | Accession # | MS-Digest Index # | Protein Name                                  |                             |                                               |                             |                             |                             |                       |         |         |         |         |         |                             |                             |         |                       |         |         |      |       |
|-------------------------|-------|---------|-----|------------------|----------------|------------------------------------------|---------------------------------|----------------------------|-----------------------------|-----------------|---------|-------------|-------------------|-----------------------------------------------|-----------------------------|-----------------------------------------------|-----------------------------|-----------------------------|-----------------------------|-----------------------|---------|---------|---------|---------|---------|-----------------------------|-----------------------------|---------|-----------------------|---------|---------|------|-------|
| 1                       | 10.01 | 62.4    | 5   | 13/25            | K29k K33k      | (K)A k k I Q D k E G I P P P D Q Q R (L) | 1722.9133                       | 228.0820                   | -2.0                        | 8564.916.56     | HUMAN   | P62988      | 814891            | Ubiquitin OS=Homo sapiens GN=RPS27A PE=1 SV=1 |                             |                                               |                             |                             |                             |                       |         |         |         |         |         |                             |                             |         |                       |         |         |      |       |
| Fragment-Ion (m/z)      |       |         |     |                  |                |                                          | 70.066                          | 71.080                     | 84.082                      | 86.096          | 140.007 | 175.116     | 186.090           | 271.142                                       | 314.189                     | 322.169* <sup>2</sup>                         | 361.673* <sup>2</sup>       | 370.688* <sup>2</sup>       | 371.698                     | 385.224* <sup>3</sup> | 413.232 | 431.226 | 605.268 | 557.759 | 598.339 | 606.338* <sup>2</sup>       | 626.305* <sup>3</sup>       | 643.323 | 644.316* <sup>2</sup> | 740.367 | 768.381 |      |       |
| Frac. Inten. (% of TIC) |       |         |     |                  |                |                                          | 0.01                            | 2.63                       | 0.31                        | 0.14            | 3.32    | 2.36        | 2.38              | 3.43                                          | 3.16                        | 2.62                                          | 4.18                        | 26.56                       | 3.89                        | 2.46                  | 2.56    | 3.52    | 2.41    | 2.46    | 2.72    | 2.46                        | 2.72                        | 8.03    | 3.19                  | 6.32    | 3.83    | 5.17 | 2.34  |
| Rel. Inten. (% of BP)   |       |         |     |                  |                |                                          | 0.05                            | 9.91                       | 1.18                        | 0.53            | 12.49   | 8.87        | 8.98              | 12.90                                         | 11.89                       | 15.73                                         | 100.00                      | 14.65                       | 9.28                        | 9.64                  | 13.26   | 9.09    | 9.24    | 10.24   | 10.24   | 30.23                       | 12.02                       | 23.80   | 14.40                 | 19.47   | 8.81    |      |       |
| Score                   |       |         |     |                  |                |                                          | 0.20                            | -0.10                      | 0.50                        | 0.22            | -0.12   | 1.50        | -0.09             | -0.13                                         | 0.50                        | 1.50                                          | 0.50                        | 1.50                        | -0.15                       | -0.09                 | -0.10   | 1.50    | -0.09   | -0.09   | -0.10   | -0.09                       | -0.10                       | 0.50    | -0.12                 | 1.50    | -0.14   | 1.50 | -0.09 |
| Ion-type                |       |         |     |                  |                |                                          | PR                              | KQ                         | KQ                          | LI              | Y1      | Y1          | b <sub>1</sub>    | b <sub>2</sub>                                | y <sub>5</sub> <sup>+</sup> | y <sub>6</sub> -H <sub>2</sub> O <sup>+</sup> | y <sub>6</sub> <sup>+</sup> | y <sub>6</sub> <sup>+</sup> | y <sub>6</sub> <sup>+</sup> | Y3                    | Y3      | Y3      | Y3      | Y3      | Y3      | b <sub>3</sub> <sup>+</sup> | b <sub>3</sub> <sup>+</sup> | Y5      | Y5                    | Y6      | Y6      |      |       |
| Delta ppm               |       |         |     |                  |                |                                          | 8.2                             | 12.2                       | -9.6                        |                 | -16.9   |             |                   |                                               | 18.8                        | 22.9                                          | 22.9                        | -27.5                       | 0.7                         |                       |         |         |         |         |         |                             |                             | 24.9    |                       | 10.5    |         | -2.1 |       |

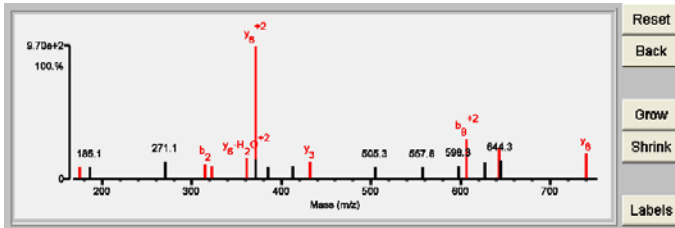

Reset

Back

Grow

Shrink

Labels

Result Summary

| Rank | Score | SPI (%) | BCS | # Unmatched Ions | Variable sites | Sequence               | MH <sup>+</sup> Calculated (Da) | MH <sup>+</sup> Error (Da) | MH <sup>+</sup> Error (ppm) | Protein MW pI (Da) | Species | Accession # | Protein Name                                                                                                      |
|------|-------|---------|-----|------------------|----------------|------------------------|---------------------------------|----------------------------|-----------------------------|--------------------|---------|-------------|-------------------------------------------------------------------------------------------------------------------|
| 1    | 12.50 | 83.3    | 5   | 11/25            | K33k           | (K)IQDkEGIPDQQR(L)     | 1523.7812                       | 114.0441                   | 0.7                         | 8564.9 6.56        | HUMAN   | P62988      | Ubiquitin OS=Homo sapiens GN=RPS27A PE=1 SV=1                                                                     |
| 2    | 4.62  | 59.6    | 2   | 18/25            | M1770m M1775m  | (R)LPGGNEVGMVAFK(mR(F) | 1605.8240                       | 32.0014                    | 7.0                         | 276556.5 6.06      | HUMAN   | Q00763      | Acetyl-CoA carboxylase 2 OS=Homo sapiens GN=ACACB PE=1 SV=2                                                       |
| 3    | 4.06  | 53.8    | 2   | 20/25            | M186m M189m    | (R)SALYLLmAEmAQHK(K)   | 1605.8127                       | 32.0126                    | 13.9                        | 162192.4 5.86      | HUMAN   | RQ96P48     | REVERSE Arf-GAP, Rho-GAP domain, ANK repeat and PH domain-containing protein 1 OS=Homo sapiens GN=ARAP1 PE=1 SV=3 |
| 4    | 4.05  | 55.1    | 1   | 18/25            | K1511k         | (R)ASESSLSSGQLRSSK(T)  | 1523.7660                       | 114.0594                   | 10.0                        | 311647.5 7.93      | HUMAN   | RP25054     | REVERSE Adenomatous polyposis coli protein OS=Homo sapiens GN=APC PE=1 SV=2                                       |
| 5    | 3.88  | 58.2    | 2   | 18/25            | None           | (R)YYWKNMLLHDK(K)      | 1637.8257                       | -0.0003                    | -0.2                        | 172424.5 7.48      | HUMAN   | RQ9P2R6     | REVERSE Arginine-glutamic acid dipeptide repeats protein OS=Homo sapiens GN=RERE PE=1 SV=2                        |

Detailed Results

| Rank | Score | SPI (%) | BCS | # Unmatched Ions | Variable sites | Sequence           | MH <sup>+</sup> Calculated (Da) | MH <sup>+</sup> Error (Da) | MH <sup>+</sup> Error (ppm) | Protein MW pI (Da) | Species | Accession # | MS-Digest Index # | Protein Name                                  |
|------|-------|---------|-----|------------------|----------------|--------------------|---------------------------------|----------------------------|-----------------------------|--------------------|---------|-------------|-------------------|-----------------------------------------------|
| 1    | 12.50 | 83.3    | 5   | 11/25            | K33k           | (K)IQDkEGIPDQQR(L) | 1523.7812                       | 114.0441                   | 0.7                         | 8564.9 6.56        | HUMAN   | P62988      | 814891            | Ubiquitin OS=Homo sapiens GN=RPS27A PE=1 SV=1 |

| Fragment-Ion (m/z)      | 70.066 | 84.080 | 86.096 | 87.063 | 99.048 | 228.110 | 242.146 | 322.160 | 367.824 | 370.690*2 | 370.857*2 | 393.193 | 427.221 | 431.243 | 435.738*2 | 449.990 | 554.750*2 | 643.327 | 644.708*2 | 657.321 | 740.363 | 762.374*2 | 786.347 | 898.463 | 898.565 |
|-------------------------|--------|--------|--------|--------|--------|---------|---------|---------|---------|-----------|-----------|---------|---------|---------|-----------|---------|-----------|---------|-----------|---------|---------|-----------|---------|---------|---------|
| Frac. Inten. (% of TIC) | 0.00   | 0.06   | 6.81   | 1.55   | 1.42   | 1.23    | 1.48    | 2.74    | 1.34    | 37.27     | 1.53      | 2.87    | 1.10    | 3.03    | 4.16      | 1.13    | 1.11      | 6.64    | 1.20      | 1.42    | 11.31   | 1.66      | 1.50    | 4.43    | 3.02    |
| Rel. Inten. (% of BP)   | 0.01   | 0.16   | 18.28  | 4.16   | 3.80   | 3.29    | 3.97    | 7.36    | 3.59    | 100.00    | 4.10      | 7.71    | 2.95    | 8.13    | 11.15     | 3.04    | 2.97      | 17.81   | 3.22      | 3.82    | 30.36   | 4.47      | 4.01    | 11.87   | 8.09    |
| Score                   | 0.20   | 0.50   | 0.50   | -0.04  | -0.04  | -0.03   | 0.50    | 1.50    | -0.04   | 1.50      | -0.04     | 0.50    | 1.50    | 1.50    | 0.50      | -0.03   | -0.03     | 16.6    | -0.03     | 0.75    | 1.50    | -0.04     | -0.04   | 0.50    | -0.98   |
| Ion-type                | PR     | KQ     | a1     |        |        |         | b2      | y++5    |         | y6*2      |           | b++6    | y++7    | y3      | a7*2      |         |           | y5      |           | DKEGI   | y6      |           |         | b7      |         |
| Delta ppm               | 5.3    | -5.7   | -4.9   |        |        |         | -15.4   | -4.2    |         | 4.8       |           | -1.1    | -19.8   | 16.0    |           |         |           | 16.6    |           | 0.4     | -7.5    |           |         | -0.2    |         |

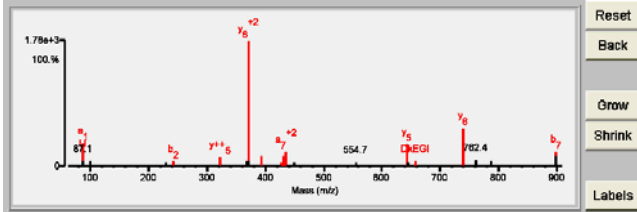

Result Summary

| Rank | Score | SPI (%) | BCS | # Unmatched Ions | Variable sites | Sequence                                                                            | MH <sup>+</sup> Calculated (Da) | MH <sup>+</sup> Error (Da) | MH <sup>+</sup> Error (ppm) | Protein MW/pt (Da) | Species | Accession #             | Protein Name                                                                         |
|------|-------|---------|-----|------------------|----------------|-------------------------------------------------------------------------------------|---------------------------------|----------------------------|-----------------------------|--------------------|---------|-------------------------|--------------------------------------------------------------------------------------|
| 1    | 24.82 | 96.6    | 10  | 2/25             | K48k           | (R) <u>L</u> I <u>F</u> A <u>G</u> K <u>L</u> E <u>D</u> G <u>R</u> (T)             | 1346.7427                       | 114.0498                   | 4.7                         | 8564.9/6.56        | HUMAN   | <a href="#">P62988</a>  | Ubiquitin OS=Homo sapiens GN=RPS27A PE=1 SV=1                                        |
| 2    | 14.98 | 71.2    | 5   | 9/25             | None           | (R) <u>I</u> L <u>F</u> A <u>G</u> T <u>A</u> N <u>G</u> E <u>A</u> Q <u>L</u> R(R) | 1460.7856                       | 0.0069                     | 4.7                         | 51834.5/6.55       | HUMAN   | <a href="#">RQ13882</a> | REVERSE Tyrosine-protein kinase 6 OS=Homo sapiens GN=PTK6 PE=1 SV=1                  |
| 3    | 11.83 | 73.8    | 6   | 9/25             | K70k           | (R) <u>I</u> L <u>M</u> C <u>A</u> Q <u>K</u> Q <u>V</u> G <u>A</u> K(Q)            | 1346.7283                       | 114.0642                   | 14.6                        | 54142.2/5.83       | HUMAN   | <a href="#">RQ6NXE6</a> | REVERSE Armadillo repeat-containing protein 6 OS=Homo sapiens GN=ARMC6 PE=1 SV=2     |
| 4    | 10.81 | 68.0    | 3   | 11/25            | S83s K88k      | (K) <u>L</u> I <u>F</u> D <u>s</u> <u>F</u> I <u>K</u> R <u>k</u> (V)               | 1266.7569                       | 194.0357                   | 18.1                        | 34222.3/8.74       | HUMAN   | <a href="#">Q8NH49</a>  | Olfactory receptor 4X1 OS=Homo sapiens GN=OR4X1 PE=2 SV=1                            |
| 5    | 10.74 | 63.9    | 5   | 12/25            | T305f K311k    | (K) <u>I</u> L <u>P</u> V <u>D</u> L <u>A</u> A <u>k</u> (Q)                        | 1266.8032                       | 193.9894                   | -13.6                       | 65331.6/6.24       | HUMAN   | <a href="#">A6NK59</a>  | Ankyrin repeat and SOCS box-containing protein 14 OS=Homo sapiens GN=ASB14 PE=2 SV=2 |

Detailed Results

| Rank | Score | SPI (%) | BCS | # Unmatched Ions | Variable sites | Sequence                          | MH <sup>+</sup> Calculated (Da) | MH <sup>+</sup> Error (Da) | MH <sup>+</sup> Error (ppm) | Protein MW/pt (Da) | Species | Accession #            | MS-Digest Index #      | Protein Name                                  |
|------|-------|---------|-----|------------------|----------------|-----------------------------------|---------------------------------|----------------------------|-----------------------------|--------------------|---------|------------------------|------------------------|-----------------------------------------------|
| 1    | 24.82 | 96.6    | 10  | 2/25             | K48k           | (R) L/I/F/A/G/K/I/Q/L/E/D/G R (T) | 1346.7427                       | 114.0498                   | 4.7                         | 8564.9/6.56        | HUMAN   | <a href="#">P62988</a> | <a href="#">814891</a> | Ubiquitin OS=Homo sapiens GN=RPS27A PE=1 SV=1 |

  

| Fragment-ion (m/z)     | 84.082 | 86.096 | 120.080 | 199.181 | 200.187 | 227.176 | 232.140 | 347.173 | 374.240 | 445.286 | 476.207          | 508.771 <sup>+2</sup> | 544.278 <sup>+2</sup> | 589.285          | 609.300 <sup>+2</sup> | 617.807 <sup>+2</sup> | 674.368 <sup>+2</sup> | 699.320 | 702.414 <sup>+2</sup> | 717.344 | 744.444 | 959.463 | 1016.516 | 1087.555 | 1234.605 |
|------------------------|--------|--------|---------|---------|---------|---------|---------|---------|---------|---------|------------------|-----------------------|-----------------------|------------------|-----------------------|-----------------------|-----------------------|---------|-----------------------|---------|---------|---------|----------|----------|----------|
| Frac. Inten.(% of TIC) | 0.08   | 5.66   | 0.09    | 7.99    | 2.28    | 6.93    | 6.86    | 2.43    | 2.60    | 1.16    | 4.58             | 1.63                  | 2.33                  | 4.90             | 2.65                  | 18.96                 | 2.21                  | 1.55    | 1.15                  | 3.88    | 1.17    | 2.08    | 6.83     | 5.32     | 4.69     |
| Rel. Inten.(% of BP)   | 0.42   | 29.87  | 0.49    | 42.11   | 12.02   | 36.52   | 36.17   | 12.83   | 13.71   | 6.13    | 24.13            | 8.59                  | 12.29                 | 25.81            | 13.98                 | 100.00                | 11.63                 | 8.18    | 6.08                  | 20.44   | 6.15    | 10.98   | 36.00    | 28.07    | 24.73    |
| Score                  | 0.50   | 0.50   | 1.00    | 0.50    | -0.12   | 0.50    | 1.50    | 1.50    | 0.50    | 1.50    | 1.50             | 1.50                  | 1.50                  | 1.50             | 1.50                  | 0.50                  | 1.50                  | 1.50    | 0.50                  | -0.06   | 1.50    | 0.50    | 1.50     | 1.50     | 1.50     |
| Ion-type               | KQ     | a1     | F       | a2      | b2      | y2      | y3      | b3      | b4      | y4      | y8 <sup>+2</sup> | y9 <sup>+2</sup>      | y5 <sup>+2</sup>      | y6 <sup>+2</sup> | y10-NH3 <sup>+2</sup> | y10 <sup>+2</sup>     | y11 <sup>+2</sup>     | y6-H2O  |                       | y6      | b6      | y7      | y6       | y9       | y10      |
| Delta ppm              | 18.1   | -20.0  | -8.1    | -5.0    | -3.5    | -3.9    | 16.8    | -12.3   | 8.0     | -7.2    | 22.0             | -0.1                  | -14.8                 | 1.5              | -8.4                  | 20.6                  | -30.9                 |         |                       | -11.4   | 3.6     | -29.1   | 3.8      | 5.4      | -10.4    |

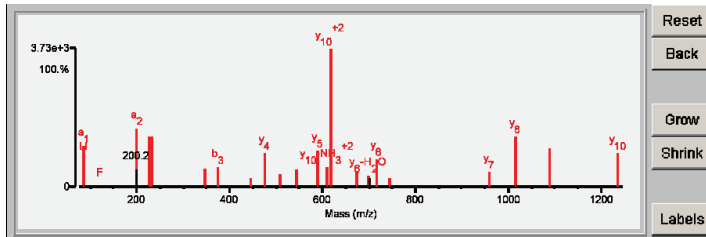

Result Summary

| Rank | Score | SPI (%) | BCS | # Unmatched Ions | Variable sites | Sequence                   | MH <sup>+</sup> Calculated (Da) | MH <sup>+</sup> Error (Da) | MH <sup>+</sup> Error (ppm) | Protein MW (Da) | Species | Accession # | Protein Name                                                                      |
|------|-------|---------|-----|------------------|----------------|----------------------------|---------------------------------|----------------------------|-----------------------------|-----------------|---------|-------------|-----------------------------------------------------------------------------------|
| 1    | 28.38 | 97.9    | 14  | 1/25             | K63k           | (R)TLSDYNIQKESTLHLVLR(L)   | 2130.1553                       | 114.0609                   | 8.0                         | 8564.9/6.56     | HUMAN   | P62988      | Ubiquitin OS=Homo sapiens GN=RPS27A PE=1 SV=1                                     |
| 2    | 8.39  | 69.0    | 2   | 13/25            | None           | (K)LTLEYHGPILDRIILKRLTR(M) | 2244.2611                       | -0.0449                    | -20.0                       | 162192.8/9.31   | HUMAN   | RQ9P227     | REVERSE Rho GTPase-activating protein 23 OS=Homo sapiens GN=ARHGAP23 PE=1 SV=2    |
| 3    | 8.19  | 64.0    | 3   | 14/25            | M188m          | (K)TIVmQKEAPLYQFPFLFR(W)   | 2228.1936                       | 16.0226                    | 12.3                        | 209292.0/5.93   | HUMAN   | RQ2WGJ9     | REVERSE Fer-1-like protein 6 OS=Homo sapiens GN=FER1L6 PE=2 SV=1                  |
| 4    | 8.19  | 64.0    | 3   | 14/25            | M270m K267k    | (R)TLIYYLDEIPPKFSmKR(L)    | 2114.1355                       | 130.0808                   | 19.1                        | 35709.6/9.14    | HUMAN   | P09758      | Tumor-associated calcium signal transducer 2 OS=Homo sapiens GN=TACSTD2 PE=1 SV=3 |
| 4    | 8.19  | 64.0    | 3   | 14/25            | M270m K271k    | (R)TLIYYLDEIPPKFSmKR(L)    | 2114.1355                       | 130.0808                   | 19.1                        | 35709.6/9.14    | HUMAN   | P09758      | Tumor-associated calcium signal transducer 2 OS=Homo sapiens GN=TACSTD2 PE=1 SV=3 |

Detailed Results

| Rank                                                                                                                                                                                                                                                                                                                                                                                                                                                                                                                                                                                                                                                                                                                                                                                                                                                                                                                                                                                                                                                                                                                                                                                                                                                                                                                                                                                                                                                                                                                                                                                                                                                                                                                                                                                                                                                                                                                                                                                                                                                                                                                                                                                                                                                                                                                                                                                                                                                                                                                                                                                                                                                                                                                                                                                                                                                                     | Score  | SPI (%) | BCS     | # Unmatched Ions | Variable sites | Sequence                                  | MH <sup>+</sup> Calculated (Da) | MH <sup>+</sup> Error (Da) | MH <sup>+</sup> Error (ppm) | Protein MW (Da)       | Species | Accession #           | MS-Digest Index #     | Protein Name                                  |                       |                       |         |                       |                       |                       |         |                       |                        |                        |                       |         |                       |                       |                       |                       |                       |         |                       |                       |                       |         |                       |                        |                        |          |                        |      |      |      |      |       |      |      |      |      |      |      |      |      |      |      |      |      |      |      |      |      |      |      |       |      |                      |      |      |      |      |       |      |       |      |      |      |       |      |      |       |       |      |      |       |       |       |      |       |       |        |      |       |      |      |      |      |      |       |      |      |      |      |      |      |      |      |      |      |      |      |      |      |      |      |      |      |      |          |    |    |   |    |    |    |    |    |    |                   |    |                   |                       |                   |                       |                   |        |                   |                   |                   |    |                   |                       |                   |    |           |      |      |       |       |       |       |      |     |      |      |      |                   |     |      |     |      |     |      |      |     |      |      |      |      |     |
|--------------------------------------------------------------------------------------------------------------------------------------------------------------------------------------------------------------------------------------------------------------------------------------------------------------------------------------------------------------------------------------------------------------------------------------------------------------------------------------------------------------------------------------------------------------------------------------------------------------------------------------------------------------------------------------------------------------------------------------------------------------------------------------------------------------------------------------------------------------------------------------------------------------------------------------------------------------------------------------------------------------------------------------------------------------------------------------------------------------------------------------------------------------------------------------------------------------------------------------------------------------------------------------------------------------------------------------------------------------------------------------------------------------------------------------------------------------------------------------------------------------------------------------------------------------------------------------------------------------------------------------------------------------------------------------------------------------------------------------------------------------------------------------------------------------------------------------------------------------------------------------------------------------------------------------------------------------------------------------------------------------------------------------------------------------------------------------------------------------------------------------------------------------------------------------------------------------------------------------------------------------------------------------------------------------------------------------------------------------------------------------------------------------------------------------------------------------------------------------------------------------------------------------------------------------------------------------------------------------------------------------------------------------------------------------------------------------------------------------------------------------------------------------------------------------------------------------------------------------------------|--------|---------|---------|------------------|----------------|-------------------------------------------|---------------------------------|----------------------------|-----------------------------|-----------------------|---------|-----------------------|-----------------------|-----------------------------------------------|-----------------------|-----------------------|---------|-----------------------|-----------------------|-----------------------|---------|-----------------------|------------------------|------------------------|-----------------------|---------|-----------------------|-----------------------|-----------------------|-----------------------|-----------------------|---------|-----------------------|-----------------------|-----------------------|---------|-----------------------|------------------------|------------------------|----------|------------------------|------|------|------|------|-------|------|------|------|------|------|------|------|------|------|------|------|------|------|------|------|------|------|------|-------|------|----------------------|------|------|------|------|-------|------|-------|------|------|------|-------|------|------|-------|-------|------|------|-------|-------|-------|------|-------|-------|--------|------|-------|------|------|------|------|------|-------|------|------|------|------|------|------|------|------|------|------|------|------|------|------|------|------|------|------|------|----------|----|----|---|----|----|----|----|----|----|-------------------|----|-------------------|-----------------------|-------------------|-----------------------|-------------------|--------|-------------------|-------------------|-------------------|----|-------------------|-----------------------|-------------------|----|-----------|------|------|-------|-------|-------|-------|------|-----|------|------|------|-------------------|-----|------|-----|------|-----|------|------|-----|------|------|------|------|-----|
| 1                                                                                                                                                                                                                                                                                                                                                                                                                                                                                                                                                                                                                                                                                                                                                                                                                                                                                                                                                                                                                                                                                                                                                                                                                                                                                                                                                                                                                                                                                                                                                                                                                                                                                                                                                                                                                                                                                                                                                                                                                                                                                                                                                                                                                                                                                                                                                                                                                                                                                                                                                                                                                                                                                                                                                                                                                                                                        | 28.38  | 97.9    | 14      | 1/25             | K63k           | (R)T/L/S/D/Y/N/I/Q/K/E/S/T/L/H/L/V/L/R(L) | 2130.1553                       | 114.0609                   | 8.0                         | 8564.9/6.56           | HUMAN   | P62988                | 914891                | Ubiquitin OS=Homo sapiens GN=RPS27A PE=1 SV=1 |                       |                       |         |                       |                       |                       |         |                       |                        |                        |                       |         |                       |                       |                       |                       |                       |         |                       |                       |                       |         |                       |                        |                        |          |                        |      |      |      |      |       |      |      |      |      |      |      |      |      |      |      |      |      |      |      |      |      |      |      |       |      |                      |      |      |      |      |       |      |       |      |      |      |       |      |      |       |       |      |      |       |       |       |      |       |       |        |      |       |      |      |      |      |      |       |      |      |      |      |      |      |      |      |      |      |      |      |      |      |      |      |      |      |      |          |    |    |   |    |    |    |    |    |    |                   |    |                   |                       |                   |                       |                   |        |                   |                   |                   |    |                   |                       |                   |    |           |      |      |       |       |       |       |      |     |      |      |      |                   |     |      |     |      |     |      |      |     |      |      |      |      |     |
| <table border="1"> <thead> <tr> <th>Fragment-ion (m/z)</th> <th>86.096</th> <th>101.071</th> <th>136.074</th> <th>175.117</th> <th>187.143</th> <th>188.145</th> <th>215.138</th> <th>387.274</th> <th>500.352</th> <th>610.014<sup>+3</sup></th> <th>637.411</th> <th>655.383<sup>+2</sup></th> <th>671.366<sup>+3</sup></th> <th>677.362<sup>+3</sup></th> <th>710.407<sup>+2</sup></th> <th>715.056<sup>+3</sup></th> <th>719.410</th> <th>775.967<sup>+2</sup></th> <th>832.978<sup>+2</sup></th> <th>914.507<sup>+2</sup></th> <th>938.577</th> <th>972.016<sup>+2</sup></th> <th>1007.042<sup>+2</sup></th> <th>1015.539<sup>+2</sup></th> <th>1067.623</th> </tr> </thead> <tbody> <tr> <td>Frac. Inten.(% of TIC)</td> <td>0.10</td> <td>0.06</td> <td>0.08</td> <td>1.32</td> <td>20.75</td> <td>2.11</td> <td>5.66</td> <td>1.38</td> <td>1.45</td> <td>1.26</td> <td>2.66</td> <td>2.25</td> <td>1.91</td> <td>6.50</td> <td>4.04</td> <td>1.77</td> <td>2.32</td> <td>3.03</td> <td>4.05</td> <td>4.57</td> <td>1.88</td> <td>3.45</td> <td>2.35</td> <td>23.45</td> <td>1.61</td> </tr> <tr> <td>Rel. Inten.(% of BP)</td> <td>0.41</td> <td>0.24</td> <td>0.35</td> <td>5.64</td> <td>88.46</td> <td>9.98</td> <td>24.13</td> <td>5.88</td> <td>6.17</td> <td>5.38</td> <td>11.32</td> <td>9.59</td> <td>8.15</td> <td>27.74</td> <td>17.23</td> <td>7.56</td> <td>9.90</td> <td>12.92</td> <td>17.27</td> <td>19.47</td> <td>8.02</td> <td>14.70</td> <td>10.02</td> <td>100.00</td> <td>6.89</td> </tr> <tr> <td>Score</td> <td>0.22</td> <td>0.50</td> <td>1.00</td> <td>1.50</td> <td>0.50</td> <td>-0.09</td> <td>0.75</td> <td>1.50</td> <td>1.50</td> <td>1.50</td> <td>1.50</td> <td>1.50</td> <td>0.50</td> <td>1.50</td> <td>0.50</td> <td>1.50</td> <td>1.50</td> <td>1.50</td> <td>1.50</td> <td>1.50</td> <td>1.50</td> <td>1.50</td> <td>0.50</td> <td>1.50</td> <td>1.50</td> </tr> <tr> <td>Ion-type</td> <td>LI</td> <td>QK</td> <td>Y</td> <td>y1</td> <td>a2</td> <td>b2</td> <td>y3</td> <td>y4</td> <td>y4</td> <td>y14<sup>+3</sup></td> <td>y5</td> <td>y10<sup>+2</sup></td> <td>y16-H2O<sup>+3</sup></td> <td>y16<sup>+3</sup></td> <td>y11+H2O<sup>+2</sup></td> <td>y17<sup>+3</sup></td> <td>y**+11</td> <td>y12<sup>+2</sup></td> <td>y13<sup>+2</sup></td> <td>y14<sup>+2</sup></td> <td>y6</td> <td>y15<sup>+2</sup></td> <td>y16-NH3<sup>+2</sup></td> <td>y16<sup>+2</sup></td> <td>y6</td> </tr> <tr> <td>Delta ppm</td> <td>-4.9</td> <td>-0.4</td> <td>-10.2</td> <td>-12.9</td> <td>-13.4</td> <td>TL-28</td> <td>-8.4</td> <td>6.1</td> <td>-6.8</td> <td>10.6</td> <td>-5.2</td> <td>y10<sup>+2</sup></td> <td>0.4</td> <td>14.3</td> <td>2.6</td> <td>-0.7</td> <td>0.9</td> <td>-2.4</td> <td>15.7</td> <td>2.7</td> <td>-0.0</td> <td>-1.3</td> <td>-5.4</td> <td>18.1</td> <td>1.7</td> </tr> </tbody> </table> |        |         |         |                  |                |                                           |                                 |                            |                             |                       |         |                       |                       |                                               | Fragment-ion (m/z)    | 86.096                | 101.071 | 136.074               | 175.117               | 187.143               | 188.145 | 215.138               | 387.274                | 500.352                | 610.014 <sup>+3</sup> | 637.411 | 655.383 <sup>+2</sup> | 671.366 <sup>+3</sup> | 677.362 <sup>+3</sup> | 710.407 <sup>+2</sup> | 715.056 <sup>+3</sup> | 719.410 | 775.967 <sup>+2</sup> | 832.978 <sup>+2</sup> | 914.507 <sup>+2</sup> | 938.577 | 972.016 <sup>+2</sup> | 1007.042 <sup>+2</sup> | 1015.539 <sup>+2</sup> | 1067.623 | Frac. Inten.(% of TIC) | 0.10 | 0.06 | 0.08 | 1.32 | 20.75 | 2.11 | 5.66 | 1.38 | 1.45 | 1.26 | 2.66 | 2.25 | 1.91 | 6.50 | 4.04 | 1.77 | 2.32 | 3.03 | 4.05 | 4.57 | 1.88 | 3.45 | 2.35 | 23.45 | 1.61 | Rel. Inten.(% of BP) | 0.41 | 0.24 | 0.35 | 5.64 | 88.46 | 9.98 | 24.13 | 5.88 | 6.17 | 5.38 | 11.32 | 9.59 | 8.15 | 27.74 | 17.23 | 7.56 | 9.90 | 12.92 | 17.27 | 19.47 | 8.02 | 14.70 | 10.02 | 100.00 | 6.89 | Score | 0.22 | 0.50 | 1.00 | 1.50 | 0.50 | -0.09 | 0.75 | 1.50 | 1.50 | 1.50 | 1.50 | 1.50 | 0.50 | 1.50 | 0.50 | 1.50 | 1.50 | 1.50 | 1.50 | 1.50 | 1.50 | 1.50 | 0.50 | 1.50 | 1.50 | Ion-type | LI | QK | Y | y1 | a2 | b2 | y3 | y4 | y4 | y14 <sup>+3</sup> | y5 | y10 <sup>+2</sup> | y16-H2O <sup>+3</sup> | y16 <sup>+3</sup> | y11+H2O <sup>+2</sup> | y17 <sup>+3</sup> | y**+11 | y12 <sup>+2</sup> | y13 <sup>+2</sup> | y14 <sup>+2</sup> | y6 | y15 <sup>+2</sup> | y16-NH3 <sup>+2</sup> | y16 <sup>+2</sup> | y6 | Delta ppm | -4.9 | -0.4 | -10.2 | -12.9 | -13.4 | TL-28 | -8.4 | 6.1 | -6.8 | 10.6 | -5.2 | y10 <sup>+2</sup> | 0.4 | 14.3 | 2.6 | -0.7 | 0.9 | -2.4 | 15.7 | 2.7 | -0.0 | -1.3 | -5.4 | 18.1 | 1.7 |
| Fragment-ion (m/z)                                                                                                                                                                                                                                                                                                                                                                                                                                                                                                                                                                                                                                                                                                                                                                                                                                                                                                                                                                                                                                                                                                                                                                                                                                                                                                                                                                                                                                                                                                                                                                                                                                                                                                                                                                                                                                                                                                                                                                                                                                                                                                                                                                                                                                                                                                                                                                                                                                                                                                                                                                                                                                                                                                                                                                                                                                                       | 86.096 | 101.071 | 136.074 | 175.117          | 187.143        | 188.145                                   | 215.138                         | 387.274                    | 500.352                     | 610.014 <sup>+3</sup> | 637.411 | 655.383 <sup>+2</sup> | 671.366 <sup>+3</sup> | 677.362 <sup>+3</sup>                         | 710.407 <sup>+2</sup> | 715.056 <sup>+3</sup> | 719.410 | 775.967 <sup>+2</sup> | 832.978 <sup>+2</sup> | 914.507 <sup>+2</sup> | 938.577 | 972.016 <sup>+2</sup> | 1007.042 <sup>+2</sup> | 1015.539 <sup>+2</sup> | 1067.623              |         |                       |                       |                       |                       |                       |         |                       |                       |                       |         |                       |                        |                        |          |                        |      |      |      |      |       |      |      |      |      |      |      |      |      |      |      |      |      |      |      |      |      |      |      |       |      |                      |      |      |      |      |       |      |       |      |      |      |       |      |      |       |       |      |      |       |       |       |      |       |       |        |      |       |      |      |      |      |      |       |      |      |      |      |      |      |      |      |      |      |      |      |      |      |      |      |      |      |      |          |    |    |   |    |    |    |    |    |    |                   |    |                   |                       |                   |                       |                   |        |                   |                   |                   |    |                   |                       |                   |    |           |      |      |       |       |       |       |      |     |      |      |      |                   |     |      |     |      |     |      |      |     |      |      |      |      |     |
| Frac. Inten.(% of TIC)                                                                                                                                                                                                                                                                                                                                                                                                                                                                                                                                                                                                                                                                                                                                                                                                                                                                                                                                                                                                                                                                                                                                                                                                                                                                                                                                                                                                                                                                                                                                                                                                                                                                                                                                                                                                                                                                                                                                                                                                                                                                                                                                                                                                                                                                                                                                                                                                                                                                                                                                                                                                                                                                                                                                                                                                                                                   | 0.10   | 0.06    | 0.08    | 1.32             | 20.75          | 2.11                                      | 5.66                            | 1.38                       | 1.45                        | 1.26                  | 2.66    | 2.25                  | 1.91                  | 6.50                                          | 4.04                  | 1.77                  | 2.32    | 3.03                  | 4.05                  | 4.57                  | 1.88    | 3.45                  | 2.35                   | 23.45                  | 1.61                  |         |                       |                       |                       |                       |                       |         |                       |                       |                       |         |                       |                        |                        |          |                        |      |      |      |      |       |      |      |      |      |      |      |      |      |      |      |      |      |      |      |      |      |      |      |       |      |                      |      |      |      |      |       |      |       |      |      |      |       |      |      |       |       |      |      |       |       |       |      |       |       |        |      |       |      |      |      |      |      |       |      |      |      |      |      |      |      |      |      |      |      |      |      |      |      |      |      |      |      |          |    |    |   |    |    |    |    |    |    |                   |    |                   |                       |                   |                       |                   |        |                   |                   |                   |    |                   |                       |                   |    |           |      |      |       |       |       |       |      |     |      |      |      |                   |     |      |     |      |     |      |      |     |      |      |      |      |     |
| Rel. Inten.(% of BP)                                                                                                                                                                                                                                                                                                                                                                                                                                                                                                                                                                                                                                                                                                                                                                                                                                                                                                                                                                                                                                                                                                                                                                                                                                                                                                                                                                                                                                                                                                                                                                                                                                                                                                                                                                                                                                                                                                                                                                                                                                                                                                                                                                                                                                                                                                                                                                                                                                                                                                                                                                                                                                                                                                                                                                                                                                                     | 0.41   | 0.24    | 0.35    | 5.64             | 88.46          | 9.98                                      | 24.13                           | 5.88                       | 6.17                        | 5.38                  | 11.32   | 9.59                  | 8.15                  | 27.74                                         | 17.23                 | 7.56                  | 9.90    | 12.92                 | 17.27                 | 19.47                 | 8.02    | 14.70                 | 10.02                  | 100.00                 | 6.89                  |         |                       |                       |                       |                       |                       |         |                       |                       |                       |         |                       |                        |                        |          |                        |      |      |      |      |       |      |      |      |      |      |      |      |      |      |      |      |      |      |      |      |      |      |      |       |      |                      |      |      |      |      |       |      |       |      |      |      |       |      |      |       |       |      |      |       |       |       |      |       |       |        |      |       |      |      |      |      |      |       |      |      |      |      |      |      |      |      |      |      |      |      |      |      |      |      |      |      |      |          |    |    |   |    |    |    |    |    |    |                   |    |                   |                       |                   |                       |                   |        |                   |                   |                   |    |                   |                       |                   |    |           |      |      |       |       |       |       |      |     |      |      |      |                   |     |      |     |      |     |      |      |     |      |      |      |      |     |
| Score                                                                                                                                                                                                                                                                                                                                                                                                                                                                                                                                                                                                                                                                                                                                                                                                                                                                                                                                                                                                                                                                                                                                                                                                                                                                                                                                                                                                                                                                                                                                                                                                                                                                                                                                                                                                                                                                                                                                                                                                                                                                                                                                                                                                                                                                                                                                                                                                                                                                                                                                                                                                                                                                                                                                                                                                                                                                    | 0.22   | 0.50    | 1.00    | 1.50             | 0.50           | -0.09                                     | 0.75                            | 1.50                       | 1.50                        | 1.50                  | 1.50    | 1.50                  | 0.50                  | 1.50                                          | 0.50                  | 1.50                  | 1.50    | 1.50                  | 1.50                  | 1.50                  | 1.50    | 1.50                  | 0.50                   | 1.50                   | 1.50                  |         |                       |                       |                       |                       |                       |         |                       |                       |                       |         |                       |                        |                        |          |                        |      |      |      |      |       |      |      |      |      |      |      |      |      |      |      |      |      |      |      |      |      |      |      |       |      |                      |      |      |      |      |       |      |       |      |      |      |       |      |      |       |       |      |      |       |       |       |      |       |       |        |      |       |      |      |      |      |      |       |      |      |      |      |      |      |      |      |      |      |      |      |      |      |      |      |      |      |      |          |    |    |   |    |    |    |    |    |    |                   |    |                   |                       |                   |                       |                   |        |                   |                   |                   |    |                   |                       |                   |    |           |      |      |       |       |       |       |      |     |      |      |      |                   |     |      |     |      |     |      |      |     |      |      |      |      |     |
| Ion-type                                                                                                                                                                                                                                                                                                                                                                                                                                                                                                                                                                                                                                                                                                                                                                                                                                                                                                                                                                                                                                                                                                                                                                                                                                                                                                                                                                                                                                                                                                                                                                                                                                                                                                                                                                                                                                                                                                                                                                                                                                                                                                                                                                                                                                                                                                                                                                                                                                                                                                                                                                                                                                                                                                                                                                                                                                                                 | LI     | QK      | Y       | y1               | a2             | b2                                        | y3                              | y4                         | y4                          | y14 <sup>+3</sup>     | y5      | y10 <sup>+2</sup>     | y16-H2O <sup>+3</sup> | y16 <sup>+3</sup>                             | y11+H2O <sup>+2</sup> | y17 <sup>+3</sup>     | y**+11  | y12 <sup>+2</sup>     | y13 <sup>+2</sup>     | y14 <sup>+2</sup>     | y6      | y15 <sup>+2</sup>     | y16-NH3 <sup>+2</sup>  | y16 <sup>+2</sup>      | y6                    |         |                       |                       |                       |                       |                       |         |                       |                       |                       |         |                       |                        |                        |          |                        |      |      |      |      |       |      |      |      |      |      |      |      |      |      |      |      |      |      |      |      |      |      |      |       |      |                      |      |      |      |      |       |      |       |      |      |      |       |      |      |       |       |      |      |       |       |       |      |       |       |        |      |       |      |      |      |      |      |       |      |      |      |      |      |      |      |      |      |      |      |      |      |      |      |      |      |      |      |          |    |    |   |    |    |    |    |    |    |                   |    |                   |                       |                   |                       |                   |        |                   |                   |                   |    |                   |                       |                   |    |           |      |      |       |       |       |       |      |     |      |      |      |                   |     |      |     |      |     |      |      |     |      |      |      |      |     |
| Delta ppm                                                                                                                                                                                                                                                                                                                                                                                                                                                                                                                                                                                                                                                                                                                                                                                                                                                                                                                                                                                                                                                                                                                                                                                                                                                                                                                                                                                                                                                                                                                                                                                                                                                                                                                                                                                                                                                                                                                                                                                                                                                                                                                                                                                                                                                                                                                                                                                                                                                                                                                                                                                                                                                                                                                                                                                                                                                                | -4.9   | -0.4    | -10.2   | -12.9            | -13.4          | TL-28                                     | -8.4                            | 6.1                        | -6.8                        | 10.6                  | -5.2    | y10 <sup>+2</sup>     | 0.4                   | 14.3                                          | 2.6                   | -0.7                  | 0.9     | -2.4                  | 15.7                  | 2.7                   | -0.0    | -1.3                  | -5.4                   | 18.1                   | 1.7                   |         |                       |                       |                       |                       |                       |         |                       |                       |                       |         |                       |                        |                        |          |                        |      |      |      |      |       |      |      |      |      |      |      |      |      |      |      |      |      |      |      |      |      |      |      |       |      |                      |      |      |      |      |       |      |       |      |      |      |       |      |      |       |       |      |      |       |       |       |      |       |       |        |      |       |      |      |      |      |      |       |      |      |      |      |      |      |      |      |      |      |      |      |      |      |      |      |      |      |      |          |    |    |   |    |    |    |    |    |    |                   |    |                   |                       |                   |                       |                   |        |                   |                   |                   |    |                   |                       |                   |    |           |      |      |       |       |       |       |      |     |      |      |      |                   |     |      |     |      |     |      |      |     |      |      |      |      |     |

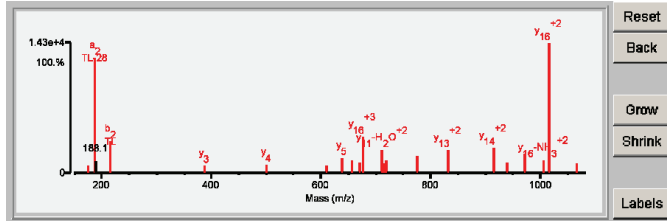

Reset  
Back  
Grow  
Shrink  
Labels

Result Summary

| Rank | Score | SPI (%) | BCS | # Unmatched ions | Variable sites | Sequence          | MH <sup>+</sup> Calculated (Da) | MH <sup>+</sup> Error (Da) | MH <sup>+</sup> Error (ppm) | Protein MW/pi (Da) | Species | Accession # | Protein Name                                  |
|------|-------|---------|-----|------------------|----------------|-------------------|---------------------------------|----------------------------|-----------------------------|--------------------|---------|-------------|-----------------------------------------------|
| 1    | 20.80 | 93.0    | 9   | 2/24             | K6k            | (-)MQIFVKTLTGK(T) | 1265.7286                       | 114.0424                   | -0.4                        | 8564.9/6.56        | HUMAN   | P62988      | Ubiquitin OS=Homo sapiens GN=RPS27A PE=1 SV=1 |
| 2    | 12.43 | 62.4    | 5   | 7/24             | K11k           | (-)MQIFVKTLTGK(T) | 1265.7286                       | 114.0424                   | -0.4                        | 8564.9/6.56        | HUMAN   | P62988      | Ubiquitin OS=Homo sapiens GN=RPS27A PE=1 SV=1 |

Detailed Results

| Rank                                                                                                                                                                                                                                                                                                                                                                                                                                                                                                                                                                                                                                                                                                                                                                                                                                                                                                                                                                                                                                                                                                                                                                                                                                                                                                                                                                                                                                                                                                                                                                                                                                                                                                                                                                                                                                                                                                                                                                                                                                                                                                                                                                                                                                                                                                                                                                                                                                                                                                                                                             | Score  | SPI (%) | BCS    | # Unmatched ions | Variable sites | Sequence                     | MH <sup>+</sup> Calculated (Da) | MH <sup>+</sup> Error (Da) | MH <sup>+</sup> Error (ppm) | Protein MW/pi (Da) | Species | Accession # | MS-Digest Index # | Protein Name                                  |                       |         |                       |                       |         |                       |                       |         |                       |         |         |         |         |         |         |                       |         |                       |                       |         |                       |                       |         |                       |         |                         |      |      |      |       |      |      |      |      |      |      |      |      |      |      |      |      |      |      |       |      |      |      |      |      |                       |      |      |      |        |      |      |       |       |       |       |       |       |       |       |       |       |       |       |       |       |       |       |       |       |       |      |      |      |      |      |      |      |       |      |      |      |      |      |      |      |      |      |      |      |      |      |      |       |      |          |   |    |    |    |   |     |    |  |    |       |    |    |    |    |                  |    |                  |                  |    |                  |                       |    |    |  |           |     |     |     |      |      |      |      |  |     |      |      |       |     |      |      |      |      |     |      |      |     |      |      |  |
|------------------------------------------------------------------------------------------------------------------------------------------------------------------------------------------------------------------------------------------------------------------------------------------------------------------------------------------------------------------------------------------------------------------------------------------------------------------------------------------------------------------------------------------------------------------------------------------------------------------------------------------------------------------------------------------------------------------------------------------------------------------------------------------------------------------------------------------------------------------------------------------------------------------------------------------------------------------------------------------------------------------------------------------------------------------------------------------------------------------------------------------------------------------------------------------------------------------------------------------------------------------------------------------------------------------------------------------------------------------------------------------------------------------------------------------------------------------------------------------------------------------------------------------------------------------------------------------------------------------------------------------------------------------------------------------------------------------------------------------------------------------------------------------------------------------------------------------------------------------------------------------------------------------------------------------------------------------------------------------------------------------------------------------------------------------------------------------------------------------------------------------------------------------------------------------------------------------------------------------------------------------------------------------------------------------------------------------------------------------------------------------------------------------------------------------------------------------------------------------------------------------------------------------------------------------|--------|---------|--------|------------------|----------------|------------------------------|---------------------------------|----------------------------|-----------------------------|--------------------|---------|-------------|-------------------|-----------------------------------------------|-----------------------|---------|-----------------------|-----------------------|---------|-----------------------|-----------------------|---------|-----------------------|---------|---------|---------|---------|---------|---------|-----------------------|---------|-----------------------|-----------------------|---------|-----------------------|-----------------------|---------|-----------------------|---------|-------------------------|------|------|------|-------|------|------|------|------|------|------|------|------|------|------|------|------|------|------|-------|------|------|------|------|------|-----------------------|------|------|------|--------|------|------|-------|-------|-------|-------|-------|-------|-------|-------|-------|-------|-------|-------|-------|-------|-------|-------|-------|-------|-------|------|------|------|------|------|------|------|-------|------|------|------|------|------|------|------|------|------|------|------|------|------|------|-------|------|----------|---|----|----|----|---|-----|----|--|----|-------|----|----|----|----|------------------|----|------------------|------------------|----|------------------|-----------------------|----|----|--|-----------|-----|-----|-----|------|------|------|------|--|-----|------|------|-------|-----|------|------|------|------|-----|------|------|-----|------|------|--|
| 1                                                                                                                                                                                                                                                                                                                                                                                                                                                                                                                                                                                                                                                                                                                                                                                                                                                                                                                                                                                                                                                                                                                                                                                                                                                                                                                                                                                                                                                                                                                                                                                                                                                                                                                                                                                                                                                                                                                                                                                                                                                                                                                                                                                                                                                                                                                                                                                                                                                                                                                                                                | 20.80  | 93.0    | 9      | 2/24             | K6k            | (-)M Q I F V K T L T G K (T) | 1265.7286                       | 114.0424                   | -0.4                        | 8564.9/6.56        | HUMAN   | P62988      | 814891            | Ubiquitin OS=Homo sapiens GN=RPS27A PE=1 SV=1 |                       |         |                       |                       |         |                       |                       |         |                       |         |         |         |         |         |         |                       |         |                       |                       |         |                       |                       |         |                       |         |                         |      |      |      |       |      |      |      |      |      |      |      |      |      |      |      |      |      |      |       |      |      |      |      |      |                       |      |      |      |        |      |      |       |       |       |       |       |       |       |       |       |       |       |       |       |       |       |       |       |       |       |      |      |      |      |      |      |      |       |      |      |      |      |      |      |      |      |      |      |      |      |      |      |       |      |          |   |    |    |    |   |     |    |  |    |       |    |    |    |    |                  |    |                  |                  |    |                  |                       |    |    |  |           |     |     |     |      |      |      |      |  |     |      |      |       |     |      |      |      |      |     |      |      |     |      |      |  |
| <table border="1"> <thead> <tr> <th>Fragment-ion (m/z)</th> <th>72.081</th> <th>84.082</th> <th>86.097</th> <th>104.053</th> <th>120.080</th> <th>129.102</th> <th>147.113</th> <th>149.074</th> <th>204.135</th> <th>233.166</th> <th>260.106</th> <th>261.153</th> <th>305.182</th> <th>373.191</th> <th>381.229<sup>+2</sup></th> <th>418.265</th> <th>430.761<sup>+2</sup></th> <th>504.301<sup>+2</sup></th> <th>519.313</th> <th>560.837<sup>+2</sup></th> <th>615.866<sup>+2</sup></th> <th>619.322</th> <th>633.365<sup>+2</sup></th> <th>761.450</th> </tr> </thead> <tbody> <tr> <td>Frac. Inten. (% of TIC)</td> <td>0.12</td> <td>0.39</td> <td>0.22</td> <td>18.89</td> <td>0.18</td> <td>0.13</td> <td>2.22</td> <td>4.83</td> <td>5.25</td> <td>2.71</td> <td>9.67</td> <td>2.81</td> <td>8.04</td> <td>4.97</td> <td>3.69</td> <td>4.71</td> <td>2.66</td> <td>2.91</td> <td>10.44</td> <td>3.22</td> <td>4.12</td> <td>2.12</td> <td>2.14</td> <td>3.54</td> </tr> <tr> <td>Rel. Inten. (% of BP)</td> <td>0.63</td> <td>2.09</td> <td>1.15</td> <td>100.00</td> <td>0.96</td> <td>0.68</td> <td>11.73</td> <td>25.59</td> <td>27.80</td> <td>14.34</td> <td>51.21</td> <td>14.89</td> <td>42.57</td> <td>26.33</td> <td>19.55</td> <td>24.94</td> <td>14.08</td> <td>15.41</td> <td>55.26</td> <td>17.03</td> <td>21.81</td> <td>11.23</td> <td>11.35</td> <td>18.73</td> </tr> <tr> <td>Score</td> <td>0.50</td> <td>0.50</td> <td>0.22</td> <td>0.50</td> <td>1.00</td> <td>0.20</td> <td>1.50</td> <td>-0.26</td> <td>1.50</td> <td>0.50</td> <td>0.50</td> <td>0.75</td> <td>1.50</td> <td>0.50</td> <td>1.50</td> <td>1.50</td> <td>1.50</td> <td>1.50</td> <td>1.50</td> <td>1.50</td> <td>0.50</td> <td>0.50</td> <td>-0.11</td> <td>1.50</td> </tr> <tr> <td>Ion-type</td> <td>V</td> <td>KQ</td> <td>LI</td> <td>a1</td> <td>F</td> <td>RKQ</td> <td>y1</td> <td></td> <td>y2</td> <td>IF-28</td> <td>b2</td> <td>IF</td> <td>y3</td> <td>b3</td> <td>y6<sup>+2</sup></td> <td>y4</td> <td>y7<sup>+2</sup></td> <td>y8<sup>+2</sup></td> <td>y5</td> <td>y9<sup>+2</sup></td> <td>y10+H2O<sup>+2</sup></td> <td>b5</td> <td>y6</td> <td></td> </tr> <tr> <td>Delta ppm</td> <td>8.7</td> <td>8.6</td> <td>7.8</td> <td>-8.1</td> <td>-3.1</td> <td>-2.6</td> <td>-0.7</td> <td></td> <td>3.6</td> <td>-1.0</td> <td>-4.0</td> <td>-30.4</td> <td>0.5</td> <td>-1.1</td> <td>-2.2</td> <td>-1.7</td> <td>-5.4</td> <td>5.7</td> <td>-1.1</td> <td>-5.5</td> <td>4.1</td> <td>-9.9</td> <td>-1.8</td> <td></td> </tr> </tbody> </table> |        |         |        |                  |                |                              |                                 |                            |                             |                    |         |             |                   |                                               | Fragment-ion (m/z)    | 72.081  | 84.082                | 86.097                | 104.053 | 120.080               | 129.102               | 147.113 | 149.074               | 204.135 | 233.166 | 260.106 | 261.153 | 305.182 | 373.191 | 381.229 <sup>+2</sup> | 418.265 | 430.761 <sup>+2</sup> | 504.301 <sup>+2</sup> | 519.313 | 560.837 <sup>+2</sup> | 615.866 <sup>+2</sup> | 619.322 | 633.365 <sup>+2</sup> | 761.450 | Frac. Inten. (% of TIC) | 0.12 | 0.39 | 0.22 | 18.89 | 0.18 | 0.13 | 2.22 | 4.83 | 5.25 | 2.71 | 9.67 | 2.81 | 8.04 | 4.97 | 3.69 | 4.71 | 2.66 | 2.91 | 10.44 | 3.22 | 4.12 | 2.12 | 2.14 | 3.54 | Rel. Inten. (% of BP) | 0.63 | 2.09 | 1.15 | 100.00 | 0.96 | 0.68 | 11.73 | 25.59 | 27.80 | 14.34 | 51.21 | 14.89 | 42.57 | 26.33 | 19.55 | 24.94 | 14.08 | 15.41 | 55.26 | 17.03 | 21.81 | 11.23 | 11.35 | 18.73 | Score | 0.50 | 0.50 | 0.22 | 0.50 | 1.00 | 0.20 | 1.50 | -0.26 | 1.50 | 0.50 | 0.50 | 0.75 | 1.50 | 0.50 | 1.50 | 1.50 | 1.50 | 1.50 | 1.50 | 1.50 | 0.50 | 0.50 | -0.11 | 1.50 | Ion-type | V | KQ | LI | a1 | F | RKQ | y1 |  | y2 | IF-28 | b2 | IF | y3 | b3 | y6 <sup>+2</sup> | y4 | y7 <sup>+2</sup> | y8 <sup>+2</sup> | y5 | y9 <sup>+2</sup> | y10+H2O <sup>+2</sup> | b5 | y6 |  | Delta ppm | 8.7 | 8.6 | 7.8 | -8.1 | -3.1 | -2.6 | -0.7 |  | 3.6 | -1.0 | -4.0 | -30.4 | 0.5 | -1.1 | -2.2 | -1.7 | -5.4 | 5.7 | -1.1 | -5.5 | 4.1 | -9.9 | -1.8 |  |
| Fragment-ion (m/z)                                                                                                                                                                                                                                                                                                                                                                                                                                                                                                                                                                                                                                                                                                                                                                                                                                                                                                                                                                                                                                                                                                                                                                                                                                                                                                                                                                                                                                                                                                                                                                                                                                                                                                                                                                                                                                                                                                                                                                                                                                                                                                                                                                                                                                                                                                                                                                                                                                                                                                                                               | 72.081 | 84.082  | 86.097 | 104.053          | 120.080        | 129.102                      | 147.113                         | 149.074                    | 204.135                     | 233.166            | 260.106 | 261.153     | 305.182           | 373.191                                       | 381.229 <sup>+2</sup> | 418.265 | 430.761 <sup>+2</sup> | 504.301 <sup>+2</sup> | 519.313 | 560.837 <sup>+2</sup> | 615.866 <sup>+2</sup> | 619.322 | 633.365 <sup>+2</sup> | 761.450 |         |         |         |         |         |                       |         |                       |                       |         |                       |                       |         |                       |         |                         |      |      |      |       |      |      |      |      |      |      |      |      |      |      |      |      |      |      |       |      |      |      |      |      |                       |      |      |      |        |      |      |       |       |       |       |       |       |       |       |       |       |       |       |       |       |       |       |       |       |       |      |      |      |      |      |      |      |       |      |      |      |      |      |      |      |      |      |      |      |      |      |      |       |      |          |   |    |    |    |   |     |    |  |    |       |    |    |    |    |                  |    |                  |                  |    |                  |                       |    |    |  |           |     |     |     |      |      |      |      |  |     |      |      |       |     |      |      |      |      |     |      |      |     |      |      |  |
| Frac. Inten. (% of TIC)                                                                                                                                                                                                                                                                                                                                                                                                                                                                                                                                                                                                                                                                                                                                                                                                                                                                                                                                                                                                                                                                                                                                                                                                                                                                                                                                                                                                                                                                                                                                                                                                                                                                                                                                                                                                                                                                                                                                                                                                                                                                                                                                                                                                                                                                                                                                                                                                                                                                                                                                          | 0.12   | 0.39    | 0.22   | 18.89            | 0.18           | 0.13                         | 2.22                            | 4.83                       | 5.25                        | 2.71               | 9.67    | 2.81        | 8.04              | 4.97                                          | 3.69                  | 4.71    | 2.66                  | 2.91                  | 10.44   | 3.22                  | 4.12                  | 2.12    | 2.14                  | 3.54    |         |         |         |         |         |                       |         |                       |                       |         |                       |                       |         |                       |         |                         |      |      |      |       |      |      |      |      |      |      |      |      |      |      |      |      |      |      |       |      |      |      |      |      |                       |      |      |      |        |      |      |       |       |       |       |       |       |       |       |       |       |       |       |       |       |       |       |       |       |       |      |      |      |      |      |      |      |       |      |      |      |      |      |      |      |      |      |      |      |      |      |      |       |      |          |   |    |    |    |   |     |    |  |    |       |    |    |    |    |                  |    |                  |                  |    |                  |                       |    |    |  |           |     |     |     |      |      |      |      |  |     |      |      |       |     |      |      |      |      |     |      |      |     |      |      |  |
| Rel. Inten. (% of BP)                                                                                                                                                                                                                                                                                                                                                                                                                                                                                                                                                                                                                                                                                                                                                                                                                                                                                                                                                                                                                                                                                                                                                                                                                                                                                                                                                                                                                                                                                                                                                                                                                                                                                                                                                                                                                                                                                                                                                                                                                                                                                                                                                                                                                                                                                                                                                                                                                                                                                                                                            | 0.63   | 2.09    | 1.15   | 100.00           | 0.96           | 0.68                         | 11.73                           | 25.59                      | 27.80                       | 14.34              | 51.21   | 14.89       | 42.57             | 26.33                                         | 19.55                 | 24.94   | 14.08                 | 15.41                 | 55.26   | 17.03                 | 21.81                 | 11.23   | 11.35                 | 18.73   |         |         |         |         |         |                       |         |                       |                       |         |                       |                       |         |                       |         |                         |      |      |      |       |      |      |      |      |      |      |      |      |      |      |      |      |      |      |       |      |      |      |      |      |                       |      |      |      |        |      |      |       |       |       |       |       |       |       |       |       |       |       |       |       |       |       |       |       |       |       |      |      |      |      |      |      |      |       |      |      |      |      |      |      |      |      |      |      |      |      |      |      |       |      |          |   |    |    |    |   |     |    |  |    |       |    |    |    |    |                  |    |                  |                  |    |                  |                       |    |    |  |           |     |     |     |      |      |      |      |  |     |      |      |       |     |      |      |      |      |     |      |      |     |      |      |  |
| Score                                                                                                                                                                                                                                                                                                                                                                                                                                                                                                                                                                                                                                                                                                                                                                                                                                                                                                                                                                                                                                                                                                                                                                                                                                                                                                                                                                                                                                                                                                                                                                                                                                                                                                                                                                                                                                                                                                                                                                                                                                                                                                                                                                                                                                                                                                                                                                                                                                                                                                                                                            | 0.50   | 0.50    | 0.22   | 0.50             | 1.00           | 0.20                         | 1.50                            | -0.26                      | 1.50                        | 0.50               | 0.50    | 0.75        | 1.50              | 0.50                                          | 1.50                  | 1.50    | 1.50                  | 1.50                  | 1.50    | 1.50                  | 0.50                  | 0.50    | -0.11                 | 1.50    |         |         |         |         |         |                       |         |                       |                       |         |                       |                       |         |                       |         |                         |      |      |      |       |      |      |      |      |      |      |      |      |      |      |      |      |      |      |       |      |      |      |      |      |                       |      |      |      |        |      |      |       |       |       |       |       |       |       |       |       |       |       |       |       |       |       |       |       |       |       |      |      |      |      |      |      |      |       |      |      |      |      |      |      |      |      |      |      |      |      |      |      |       |      |          |   |    |    |    |   |     |    |  |    |       |    |    |    |    |                  |    |                  |                  |    |                  |                       |    |    |  |           |     |     |     |      |      |      |      |  |     |      |      |       |     |      |      |      |      |     |      |      |     |      |      |  |
| Ion-type                                                                                                                                                                                                                                                                                                                                                                                                                                                                                                                                                                                                                                                                                                                                                                                                                                                                                                                                                                                                                                                                                                                                                                                                                                                                                                                                                                                                                                                                                                                                                                                                                                                                                                                                                                                                                                                                                                                                                                                                                                                                                                                                                                                                                                                                                                                                                                                                                                                                                                                                                         | V      | KQ      | LI     | a1               | F              | RKQ                          | y1                              |                            | y2                          | IF-28              | b2      | IF          | y3                | b3                                            | y6 <sup>+2</sup>      | y4      | y7 <sup>+2</sup>      | y8 <sup>+2</sup>      | y5      | y9 <sup>+2</sup>      | y10+H2O <sup>+2</sup> | b5      | y6                    |         |         |         |         |         |         |                       |         |                       |                       |         |                       |                       |         |                       |         |                         |      |      |      |       |      |      |      |      |      |      |      |      |      |      |      |      |      |      |       |      |      |      |      |      |                       |      |      |      |        |      |      |       |       |       |       |       |       |       |       |       |       |       |       |       |       |       |       |       |       |       |      |      |      |      |      |      |      |       |      |      |      |      |      |      |      |      |      |      |      |      |      |      |       |      |          |   |    |    |    |   |     |    |  |    |       |    |    |    |    |                  |    |                  |                  |    |                  |                       |    |    |  |           |     |     |     |      |      |      |      |  |     |      |      |       |     |      |      |      |      |     |      |      |     |      |      |  |
| Delta ppm                                                                                                                                                                                                                                                                                                                                                                                                                                                                                                                                                                                                                                                                                                                                                                                                                                                                                                                                                                                                                                                                                                                                                                                                                                                                                                                                                                                                                                                                                                                                                                                                                                                                                                                                                                                                                                                                                                                                                                                                                                                                                                                                                                                                                                                                                                                                                                                                                                                                                                                                                        | 8.7    | 8.6     | 7.8    | -8.1             | -3.1           | -2.6                         | -0.7                            |                            | 3.6                         | -1.0               | -4.0    | -30.4       | 0.5               | -1.1                                          | -2.2                  | -1.7    | -5.4                  | 5.7                   | -1.1    | -5.5                  | 4.1                   | -9.9    | -1.8                  |         |         |         |         |         |         |                       |         |                       |                       |         |                       |                       |         |                       |         |                         |      |      |      |       |      |      |      |      |      |      |      |      |      |      |      |      |      |      |       |      |      |      |      |      |                       |      |      |      |        |      |      |       |       |       |       |       |       |       |       |       |       |       |       |       |       |       |       |       |       |       |      |      |      |      |      |      |      |       |      |      |      |      |      |      |      |      |      |      |      |      |      |      |       |      |          |   |    |    |    |   |     |    |  |    |       |    |    |    |    |                  |    |                  |                  |    |                  |                       |    |    |  |           |     |     |     |      |      |      |      |  |     |      |      |       |     |      |      |      |      |     |      |      |     |      |      |  |

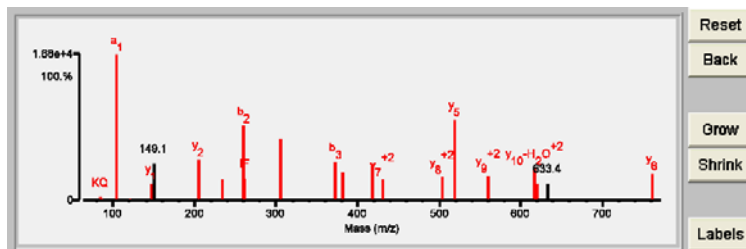

Result Summary

| Rank | Score | SPI (%) | BCS | # Unmatched Ions | Variable sites | Sequence                                                                                  | MH <sup>+</sup> Calculated (Da) | MH <sup>+</sup> Error (Da) | MH <sup>+</sup> Error (ppm) | Protein MW/pl (Da) | Species | Accession # | Protein Name                                                                                  |
|------|-------|---------|-----|------------------|----------------|-------------------------------------------------------------------------------------------|---------------------------------|----------------------------|-----------------------------|--------------------|---------|-------------|-----------------------------------------------------------------------------------------------|
| 1    | 9.89  | 68.3    | 6   | 11/25            | K6k K11k       | (-)MQIFV <sup>+</sup> TLTGK <sup>+</sup> ITILEVPSD <sup>+</sup> TIENVK <sup>+</sup> (A)   | 3034.6381                       | 228.1097                   | 7.3                         | 8564.9/6.56        | HUMAN   | P62988      | Ubiquitin OS=Homo sapiens GN=RPS27A PE=1 SV=1                                                 |
| 2    | 3.06  | 51.5    | 0   | 16/25            | K99k           | (R)AFSLEK <sup>+</sup> PRGGT <sup>+</sup> GKAEFLQLGRET <sup>+</sup> LVCR <sup>+</sup> (R) | 3148.7048                       | 114.0430                   | 0.0                         | 13891.2/9.72       | HUMAN   | RQ9Y5J5     | REVERSE Pleckstrin homology-like domain family A member 3 OS=Homo sapiens GN=PHLDA3 PE=1 SV=1 |

Detailed Results

| Rank                    | Score | SPI (%) | BCS | # Unmatched Ions | Variable sites | Sequence                                                   | MH <sup>+</sup> Calculated (Da) | MH <sup>+</sup> Error (Da) | MH <sup>+</sup> Error (ppm) | Protein MW/pl (Da) | Species | Accession # | MS-Digest Index # | Protein Name                                  |         |                  |         |         |                       |                       |         |         |         |         |         |         |                       |         |          |          |          |       |      |
|-------------------------|-------|---------|-----|------------------|----------------|------------------------------------------------------------|---------------------------------|----------------------------|-----------------------------|--------------------|---------|-------------|-------------------|-----------------------------------------------|---------|------------------|---------|---------|-----------------------|-----------------------|---------|---------|---------|---------|---------|---------|-----------------------|---------|----------|----------|----------|-------|------|
| 1                       | 9.89  | 68.3    | 6   | 11/25            | K6k K11k       | (-)M Q I F V K T L T G K T I T L E V P S D T I E N V K (A) | 3034.6381                       | 228.1097                   | 7.3                         | 8564.9/6.56        | HUMAN   | P62988      | 814891            | Ubiquitin OS=Homo sapiens GN=RPS27A PE=1 SV=1 |         |                  |         |         |                       |                       |         |         |         |         |         |         |                       |         |          |          |          |       |      |
| Fragment-ion (m/z)      |       |         |     |                  |                |                                                            | 60.045                          | 72.079                     | 84.081                      | 86.097             | 102.053 | 104.052     | 187.145           | 243.078                                       | 260.106 | 344.194          | 373.197 | 442.156 | 501.763 <sup>+2</sup> | 548.981 <sup>+4</sup> | 602.347 | 608.288 | 703.405 | 790.890 | 831.444 | 861.484 | 887.722 <sup>+3</sup> | 958.501 | 1002.507 | 1071.462 | 1131.602 |       |      |
| Frac. Inten. (% of TIC) |       |         |     |                  |                |                                                            | 2.48                            | 0.27                       | 0.11                        | 0.20               | 0.19    | 5.28        | 4.35              | 2.92                                          | 7.25    | 2.71             | 4.03    | 3.37    | 20.11                 | 2.66                  | 3.15    | 2.26    | 2.32    | 2.51    | 2.87    | 3.10    | 3.33                  | 3.29    | 16.62    | 2.29     | 2.29     |       |      |
| Rel. Inten. (% of BP)   |       |         |     |                  |                |                                                            | 12.34                           | 1.32                       | 0.56                        | 1.00               | 0.96    | 26.26       | 21.65             | 14.51                                         | 36.04   | 13.49            | 20.06   | 16.78   | 100.00                | 13.25                 | 15.67   | 11.26   | 11.54   | 12.50   | 14.27   | 15.40   | 16.54                 | 16.38   | 82.67    | 11.41    | 11.40    |       |      |
| Score                   |       |         |     |                  |                |                                                            | -0.12                           | 0.50                       | 0.50                        | 0.22               | 1.00    | 0.50        | -0.22             | 0.25                                          | 0.50    | 0.75             | 0.75    | -0.17   | 1.50                  | -0.13                 | 1.50    | -0.11   | 1.50    | -0.13   | -0.14   | 0.50    | -0.17                 | -0.16   | 16.38    | 82.67    | 11.41    | 11.40 |      |
| Ion-type                |       |         |     |                  |                |                                                            | V                               | KQ                         | LI                          | E                  | a1      | b2-NH3      | b2                | TIE                                           | b3      | y9 <sup>+2</sup> | y5      | y6      | y5                    | y6                    | y5      | y6      | y5      | y6      | bs      | bs      | bs                    | bs      | ys       | ys       | ys       | ys    |      |
| Delta ppm               |       |         |     |                  |                |                                                            | -27.4                           | -2.1                       | 6.7                         | -22.1              | -14.8   |             | -10.2             | -4.8                                          | 31.9    | 14.5             | TLTG    | -33.1   | 8.5                   | -6.0                  | -33.1   | -14.4   | -14.4   | 20.8    | 20.8    | 20.8    | 20.8                  | -2.8    | -2.8     | -2.8     | -2.8     | -2.8  | -2.8 |

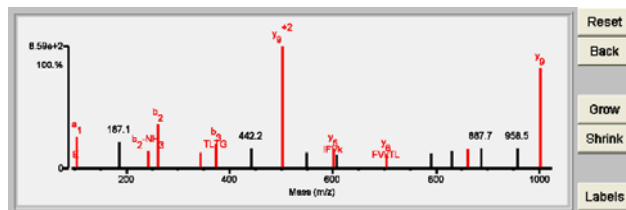

Result Summary

| Rank | Score | SPI (%) | BCS | # Unmatched Ions | Variable sites | Sequence                                        | MH <sup>+</sup> Calculated (Da) | MH <sup>+</sup> Error (Da) | MH <sup>+</sup> Error (ppm) | Protein MW/pi (Da) | Species | Accession # | Protein Name                                                                             |
|------|-------|---------|-----|------------------|----------------|-------------------------------------------------|---------------------------------|----------------------------|-----------------------------|--------------------|---------|-------------|------------------------------------------------------------------------------------------|
| 1    | 11.92 | 79.0    | 5   | 11/25            | K421k          | (K)LE <sup>+</sup> ED <sup>+</sup> STLSKSVK(N)  | 1319.7417                       | 114.0501                   | 5.0                         | 294366.9/5.79      | HUMAN   | Q9UPUS      | Ubiquitin carboxyl-terminal hydrolase 24 OS=Homo sapiens GN=USP24 PE=1 SV=3              |
| 2    | 8.17  | 69.2    | 3   | 14/25            | K424k          | (K)LE <sup>+</sup> ED <sup>+</sup> STLSKSVK(N)  | 1319.7417                       | 114.0501                   | 5.0                         | 294366.9/5.79      | HUMAN   | Q9UPUS      | Ubiquitin carboxyl-terminal hydrolase 24 OS=Homo sapiens GN=USP24 PE=1 SV=3              |
| 3    | 8.09  | 72.1    | 3   | 14/25            | None           | (K)LS <sup>+</sup> ENSKILISM <sup>+</sup> AK(E) | 1433.8032                       | -0.0115                    | -8.0                        | 141751.4/6.26      | HUMAN   | Q1MSJ5      | Centrosome and spindle pole-associated protein 1 OS=Homo sapiens GN=CSP1 PE=1 SV=2       |
| 4    | 7.93  | 69.6    | 2   | 13/25            | K118k          | (R)LL <sup>+</sup> CEK <sup>+</sup> VTTDK(D)    | 1319.7239                       | 114.0678                   | 17.4                        | 63445.4/7.02       | HUMAN   | Q96JPS      | Zinc finger protein 91 homolog OS=Homo sapiens GN=ZFP91 PE=1 SV=1                        |
| 5    | 7.39  | 68.9    | 4   | 14/25            | None           | (R)LD <sup>+</sup> SLVTACKVSK(V)                | 1433.8032                       | -0.0115                    | -8.0                        | 133471.2/7.04      | HUMAN   | RQ9HCJ5     | REVERSE Zinc finger SWIM domain-containing protein 6 OS=Homo sapiens GN=ZSWIM6 PE=2 SV=2 |

Detailed Results

| Rank | Score | SPI (%) | BCS | # Unmatched Ions | Variable sites | Sequence                                       | MH <sup>+</sup> Calculated (Da) | MH <sup>+</sup> Error (Da) | MH <sup>+</sup> Error (ppm) | Protein MW/pi (Da) | Species | Accession # | MS-Digest Index # | Protein Name                                                                |
|------|-------|---------|-----|------------------|----------------|------------------------------------------------|---------------------------------|----------------------------|-----------------------------|--------------------|---------|-------------|-------------------|-----------------------------------------------------------------------------|
| 1    | 11.92 | 79.0    | 5   | 11/25            | K421k          | (K)LE <sup>+</sup> ED <sup>+</sup> STLSKSVK(N) | 1319.7417                       | 114.0501                   | 5.0                         | 294366.9/5.79      | HUMAN   | Q9UPUS      | 815197            | Ubiquitin carboxyl-terminal hydrolase 24 OS=Homo sapiens GN=USP24 PE=1 SV=3 |

  

| Fragment-ion (m/z)     | 74.061            | 84.041 | 84.081 | 86.095         | 87.052 | 87.097 | 129.103 | 130.087                         | 141.096 | 143.082 | 199.180        | 227.065 | 227.172        | 268.089 | 286.102 | 296.089 | 333.217        | 342.209 | 397.137 | 417.209 | 557.259 | 595.309                             | 604.298            | 662.385        | 775.465        |
|------------------------|-------------------|--------|--------|----------------|--------|--------|---------|---------------------------------|---------|---------|----------------|---------|----------------|---------|---------|---------|----------------|---------|---------|---------|---------|-------------------------------------|--------------------|----------------|----------------|
| Frac. Inten.(% of TIC) | 3.14              | 0.07   | 0.27   | 39.48          | 1.98   | 1.67   | 0.16    | 4.05                            | 2.04    | 2.43    | 10.95          | 1.86    | 4.25           | 1.56    | 3.03    | 1.42    | 2.60           | 1.47    | 1.89    | 1.57    | 1.64    | 2.26                                | 1.95               | 5.92           | 2.33           |
| Rel. Inten.(% of BP)   | 7.96              | 0.19   | 0.68   | 100.00         | 5.02   | 4.23   | 0.39    | 10.27                           | 5.16    | 6.16    | 27.72          | 4.71    | 10.76          | 3.96    | 7.67    | 3.60    | 6.58           | 3.71    | 4.79    | 3.98    | 4.16    | 5.73                                | 4.93               | 15.00          | 5.90           |
| Score                  | 1.50              | 1.00   | 0.50   | 0.50           | -0.05  | -0.04  | 0.20    | 0.50                            | -0.05   | -0.06   | 0.50           | -0.05   | 0.50           | -0.04   | -0.08   | -0.04   | -0.04          | -0.04   | -0.05   | 0.75    | -0.04   | -0.04                               | 0.50               | 1.50           | 1.50           |
| Ion-type               | y <sup>+</sup> +1 | E      | KQ     | a <sub>1</sub> |        |        | RKQ     | y <sub>1</sub> -NH <sub>3</sub> |         |         | a <sub>2</sub> |         | b <sub>2</sub> |         |         |         | y <sub>3</sub> |         | SkS     |         |         | y <sup>+</sup> +10-H <sub>2</sub> O | y <sup>+</sup> +10 | y <sub>5</sub> | y <sub>6</sub> |
| Delta ppm              | 11.6              | -36.8  | -2.1   | -24.7          |        |        | 4.3     | 1.9                             |         |         | -6.5           |         | -21.6          |         |         |         | 11.3           |         | -4.4    |         |         | 4.7                                 | -22.3              | 3.1            | -2.4           |

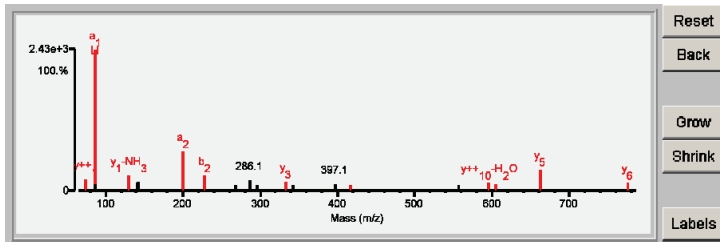



Result Summary

| Rank | Score | SPI (%) | BCS | # Unmatched Ions | Variable sites | Sequence                    | MH <sup>+</sup> Calculated (Da) | MH <sup>+</sup> Error (Da) | MH <sup>+</sup> Error (ppm) | Protein MW/pi (Da) | Species | Accession # | Protein Name                                                                     |
|------|-------|---------|-----|------------------|----------------|-----------------------------|---------------------------------|----------------------------|-----------------------------|--------------------|---------|-------------|----------------------------------------------------------------------------------|
| 1    | 20.66 | 92.2    | 11  | 3/25             | K360K          | (K)LEKIFQNAPDPTQDFSTQVAK(L) | 2478.2511                       | 114.0573                   | 5.5                         | 95786.8/4.91       | HUMAN   | P45974      | Ubiquitin carboxyl-terminal hydrolase 5 OS=Homo sapiens GN=USP5 PE=1 SV=2        |
| 2    | 5.54  | 52.9    | 3   | 14/25            | M1499m K1490k  | (K)kNRALPFVpmsYQLSQTYYR(I)  | 2462.2649                       | 130.0434                   | 2.2                         | 238876.1/7.01      | HUMAN   | Q12789      | General transcription factor 3C polypeptide 1 OS=Homo sapiens GN=GTFC1 PE=1 SV=4 |
| 3    | 5.32  | 57.1    | 2   | 13/25            | K5296k         | (R)LYWFrkGGPLTASAHIRMTDK(K) | 2478.2598                       | 114.0485                   | 2.2                         | 868488.4/5.69      | HUMAN   | Q5V579      | Obscurin OS=Homo sapiens GN=OBSCN PE=1 SV=3                                      |
| 4    | 4.38  | 51.4    | 2   | 15/25            | K16k           | (-)MWPQPRFPPHPAMSEKTQQGK(L) | 2478.2169                       | 114.0914                   | 18.7                        | 58854.6/4.80       | HUMAN   | A6NEF3      | Putative golgin subfamily A member 6-like protein 4 OS=Homo sapiens PE=5 SV=2    |
| 5    | 3.36  | 51.1    | 1   | 15/25            | K21k           | (-)MWPQPRFPPHPAMSEKTQQGK(L) | 2478.2169                       | 114.0914                   | 18.7                        | 58854.6/4.80       | HUMAN   | A6NEF3      | Putative golgin subfamily A member 6-like protein 4 OS=Homo sapiens PE=5 SV=2    |

Detailed Results

| Rank                                                                                                                                                                                                                                                                                                                                                                                                                                                                                                                                                                                                                                                                                                                                                                                                                                                                                                                                                                                                                                                                                                                                                                                                                                                                                                                                                                                                                                                                                                                                                                                                                                                                                                                                                                                                                                                                                                                                                                                                                                                                                                                                                                                                                                                                                                                                                                                                                                                                                                                                                                                                                                                                                                                                   | Score  | SPI (%) | BCS    | # Unmatched Ions | Variable sites | Sequence                                                                | MH <sup>+</sup> Calculated (Da) | MH <sup>+</sup> Error (Da) | MH <sup>+</sup> Error (ppm) | Protein MW/pi (Da) | Species               | Accession #           | MS-Digest Index # | Protein Name                                                              |                       |                       |         |                       |                  |          |          |                        |          |                       |          |                       |                       |         |                       |                       |                       |         |                       |         |          |          |                        |          |          |          |                         |      |      |      |      |      |      |      |      |      |      |      |       |      |      |       |      |      |      |      |      |      |      |      |      |      |                       |      |      |      |       |       |       |       |       |       |       |       |       |       |       |        |       |       |       |       |       |       |       |       |       |       |       |      |      |      |      |      |      |      |      |      |      |      |      |       |      |      |       |      |      |      |      |      |      |      |      |      |          |    |    |    |    |    |     |    |      |                  |    |                   |                   |  |                       |                   |  |    |                   |                  |    |    |                   |     |     |  |           |       |     |       |       |       |     |       |     |     |      |      |       |  |     |      |  |      |      |       |      |      |      |       |  |  |
|----------------------------------------------------------------------------------------------------------------------------------------------------------------------------------------------------------------------------------------------------------------------------------------------------------------------------------------------------------------------------------------------------------------------------------------------------------------------------------------------------------------------------------------------------------------------------------------------------------------------------------------------------------------------------------------------------------------------------------------------------------------------------------------------------------------------------------------------------------------------------------------------------------------------------------------------------------------------------------------------------------------------------------------------------------------------------------------------------------------------------------------------------------------------------------------------------------------------------------------------------------------------------------------------------------------------------------------------------------------------------------------------------------------------------------------------------------------------------------------------------------------------------------------------------------------------------------------------------------------------------------------------------------------------------------------------------------------------------------------------------------------------------------------------------------------------------------------------------------------------------------------------------------------------------------------------------------------------------------------------------------------------------------------------------------------------------------------------------------------------------------------------------------------------------------------------------------------------------------------------------------------------------------------------------------------------------------------------------------------------------------------------------------------------------------------------------------------------------------------------------------------------------------------------------------------------------------------------------------------------------------------------------------------------------------------------------------------------------------------|--------|---------|--------|------------------|----------------|-------------------------------------------------------------------------|---------------------------------|----------------------------|-----------------------------|--------------------|-----------------------|-----------------------|-------------------|---------------------------------------------------------------------------|-----------------------|-----------------------|---------|-----------------------|------------------|----------|----------|------------------------|----------|-----------------------|----------|-----------------------|-----------------------|---------|-----------------------|-----------------------|-----------------------|---------|-----------------------|---------|----------|----------|------------------------|----------|----------|----------|-------------------------|------|------|------|------|------|------|------|------|------|------|------|-------|------|------|-------|------|------|------|------|------|------|------|------|------|------|-----------------------|------|------|------|-------|-------|-------|-------|-------|-------|-------|-------|-------|-------|-------|--------|-------|-------|-------|-------|-------|-------|-------|-------|-------|-------|-------|------|------|------|------|------|------|------|------|------|------|------|------|-------|------|------|-------|------|------|------|------|------|------|------|------|------|----------|----|----|----|----|----|-----|----|------|------------------|----|-------------------|-------------------|--|-----------------------|-------------------|--|----|-------------------|------------------|----|----|-------------------|-----|-----|--|-----------|-------|-----|-------|-------|-------|-----|-------|-----|-----|------|------|-------|--|-----|------|--|------|------|-------|------|------|------|-------|--|--|
| 1                                                                                                                                                                                                                                                                                                                                                                                                                                                                                                                                                                                                                                                                                                                                                                                                                                                                                                                                                                                                                                                                                                                                                                                                                                                                                                                                                                                                                                                                                                                                                                                                                                                                                                                                                                                                                                                                                                                                                                                                                                                                                                                                                                                                                                                                                                                                                                                                                                                                                                                                                                                                                                                                                                                                      | 20.66  | 92.2    | 11     | 3/25             | K360K          | (K) L E / K I \ F Q / W / A / P T D / P T / Q D / F S T Q V / A / K (L) | 2478.2511                       | 114.0573                   | 5.5                         | 95786.8/4.91       | HUMAN                 | P45974                | 407680            | Ubiquitin carboxyl-terminal hydrolase 5 OS=Homo sapiens GN=USP5 PE=1 SV=2 |                       |                       |         |                       |                  |          |          |                        |          |                       |          |                       |                       |         |                       |                       |                       |         |                       |         |          |          |                        |          |          |          |                         |      |      |      |      |      |      |      |      |      |      |      |       |      |      |       |      |      |      |      |      |      |      |      |      |      |                       |      |      |      |       |       |       |       |       |       |       |       |       |       |       |        |       |       |       |       |       |       |       |       |       |       |       |      |      |      |      |      |      |      |      |      |      |      |      |       |      |      |       |      |      |      |      |      |      |      |      |      |          |    |    |    |    |    |     |    |      |                  |    |                   |                   |  |                       |                   |  |    |                   |                  |    |    |                   |     |     |  |           |       |     |       |       |       |     |       |     |     |      |      |       |  |     |      |  |      |      |       |      |      |      |       |  |  |
| <table border="1"> <thead> <tr> <th>Fragment-Ion (m/z)</th> <th>70.063</th> <th>84.082</th> <th>86.094</th> <th>147.108</th> <th>218.147</th> <th>314.136</th> <th>485.265</th> <th>503.267</th> <th>529.790<sup>+2</sup></th> <th>598.365</th> <th>602.314<sup>+2</sup></th> <th>611.301<sup>+2</sup></th> <th>716.354</th> <th>758.874<sup>+2</sup></th> <th>767.871<sup>+2</sup></th> <th>768.893<sup>+3</sup></th> <th>780.420</th> <th>803.414<sup>+2</sup></th> <th>873.464</th> <th>1023.501</th> <th>1058.559</th> <th>1175.578<sup>+2</sup></th> <th>1221.597</th> <th>1371.618</th> <th>1534.755</th> </tr> </thead> <tbody> <tr> <td>Frac. Inten. (% of TIC)</td> <td>0.00</td> <td>0.12</td> <td>0.09</td> <td>2.81</td> <td>3.39</td> <td>4.50</td> <td>3.58</td> <td>2.46</td> <td>3.29</td> <td>4.96</td> <td>2.95</td> <td>13.65</td> <td>2.16</td> <td>4.87</td> <td>15.02</td> <td>2.87</td> <td>2.62</td> <td>4.05</td> <td>3.09</td> <td>4.58</td> <td>4.49</td> <td>2.50</td> <td>5.10</td> <td>2.74</td> <td>4.13</td> </tr> <tr> <td>Rel. Inten. (% of BP)</td> <td>0.02</td> <td>0.77</td> <td>0.09</td> <td>18.71</td> <td>22.54</td> <td>29.92</td> <td>23.81</td> <td>16.38</td> <td>21.90</td> <td>33.00</td> <td>19.63</td> <td>90.85</td> <td>14.35</td> <td>32.40</td> <td>100.00</td> <td>19.09</td> <td>17.46</td> <td>26.94</td> <td>20.56</td> <td>30.49</td> <td>29.87</td> <td>16.63</td> <td>33.97</td> <td>18.27</td> <td>27.52</td> </tr> <tr> <td>Score</td> <td>0.20</td> <td>0.50</td> <td>0.22</td> <td>1.50</td> <td>1.50</td> <td>0.75</td> <td>0.75</td> <td>0.75</td> <td>0.50</td> <td>0.50</td> <td>0.50</td> <td>1.50</td> <td>-0.14</td> <td>0.50</td> <td>1.50</td> <td>-0.19</td> <td>1.50</td> <td>0.50</td> <td>0.50</td> <td>1.50</td> <td>0.50</td> <td>1.50</td> <td>1.50</td> <td>1.50</td> <td>10.5</td> </tr> <tr> <td>Ion-type</td> <td>PR</td> <td>KQ</td> <td>LI</td> <td>y1</td> <td>y2</td> <td>DPT</td> <td>b3</td> <td>IFGN</td> <td>bb<sup>+2</sup></td> <td>ba</td> <td>y11<sup>+2</sup></td> <td>y11<sup>+2</sup></td> <td></td> <td>y14-H2O<sup>+2</sup></td> <td>y14<sup>+2</sup></td> <td></td> <td>y7</td> <td>y15<sup>+2</sup></td> <td>bb<sup>+2</sup></td> <td>y9</td> <td>bb</td> <td>y20<sup>+2</sup></td> <td>y11</td> <td>y14</td> <td></td> </tr> <tr> <td>Delta ppm</td> <td>-24.6</td> <td>6.6</td> <td>-34.0</td> <td>-31.3</td> <td>-12.5</td> <td>0.1</td> <td>-16.7</td> <td>8.4</td> <td>7.8</td> <td>13.6</td> <td>17.5</td> <td>-13.8</td> <td></td> <td>7.9</td> <td>-2.4</td> <td></td> <td>-7.0</td> <td>27.9</td> <td>-22.5</td> <td>-9.8</td> <td>-4.7</td> <td>-7.8</td> <td>-11.5</td> <td></td> <td></td> </tr> </tbody> </table> |        |         |        |                  |                |                                                                         |                                 |                            |                             |                    |                       |                       |                   |                                                                           | Fragment-Ion (m/z)    | 70.063                | 84.082  | 86.094                | 147.108          | 218.147  | 314.136  | 485.265                | 503.267  | 529.790 <sup>+2</sup> | 598.365  | 602.314 <sup>+2</sup> | 611.301 <sup>+2</sup> | 716.354 | 758.874 <sup>+2</sup> | 767.871 <sup>+2</sup> | 768.893 <sup>+3</sup> | 780.420 | 803.414 <sup>+2</sup> | 873.464 | 1023.501 | 1058.559 | 1175.578 <sup>+2</sup> | 1221.597 | 1371.618 | 1534.755 | Frac. Inten. (% of TIC) | 0.00 | 0.12 | 0.09 | 2.81 | 3.39 | 4.50 | 3.58 | 2.46 | 3.29 | 4.96 | 2.95 | 13.65 | 2.16 | 4.87 | 15.02 | 2.87 | 2.62 | 4.05 | 3.09 | 4.58 | 4.49 | 2.50 | 5.10 | 2.74 | 4.13 | Rel. Inten. (% of BP) | 0.02 | 0.77 | 0.09 | 18.71 | 22.54 | 29.92 | 23.81 | 16.38 | 21.90 | 33.00 | 19.63 | 90.85 | 14.35 | 32.40 | 100.00 | 19.09 | 17.46 | 26.94 | 20.56 | 30.49 | 29.87 | 16.63 | 33.97 | 18.27 | 27.52 | Score | 0.20 | 0.50 | 0.22 | 1.50 | 1.50 | 0.75 | 0.75 | 0.75 | 0.50 | 0.50 | 0.50 | 1.50 | -0.14 | 0.50 | 1.50 | -0.19 | 1.50 | 0.50 | 0.50 | 1.50 | 0.50 | 1.50 | 1.50 | 1.50 | 10.5 | Ion-type | PR | KQ | LI | y1 | y2 | DPT | b3 | IFGN | bb <sup>+2</sup> | ba | y11 <sup>+2</sup> | y11 <sup>+2</sup> |  | y14-H2O <sup>+2</sup> | y14 <sup>+2</sup> |  | y7 | y15 <sup>+2</sup> | bb <sup>+2</sup> | y9 | bb | y20 <sup>+2</sup> | y11 | y14 |  | Delta ppm | -24.6 | 6.6 | -34.0 | -31.3 | -12.5 | 0.1 | -16.7 | 8.4 | 7.8 | 13.6 | 17.5 | -13.8 |  | 7.9 | -2.4 |  | -7.0 | 27.9 | -22.5 | -9.8 | -4.7 | -7.8 | -11.5 |  |  |
| Fragment-Ion (m/z)                                                                                                                                                                                                                                                                                                                                                                                                                                                                                                                                                                                                                                                                                                                                                                                                                                                                                                                                                                                                                                                                                                                                                                                                                                                                                                                                                                                                                                                                                                                                                                                                                                                                                                                                                                                                                                                                                                                                                                                                                                                                                                                                                                                                                                                                                                                                                                                                                                                                                                                                                                                                                                                                                                                     | 70.063 | 84.082  | 86.094 | 147.108          | 218.147        | 314.136                                                                 | 485.265                         | 503.267                    | 529.790 <sup>+2</sup>       | 598.365            | 602.314 <sup>+2</sup> | 611.301 <sup>+2</sup> | 716.354           | 758.874 <sup>+2</sup>                                                     | 767.871 <sup>+2</sup> | 768.893 <sup>+3</sup> | 780.420 | 803.414 <sup>+2</sup> | 873.464          | 1023.501 | 1058.559 | 1175.578 <sup>+2</sup> | 1221.597 | 1371.618              | 1534.755 |                       |                       |         |                       |                       |                       |         |                       |         |          |          |                        |          |          |          |                         |      |      |      |      |      |      |      |      |      |      |      |       |      |      |       |      |      |      |      |      |      |      |      |      |      |                       |      |      |      |       |       |       |       |       |       |       |       |       |       |       |        |       |       |       |       |       |       |       |       |       |       |       |      |      |      |      |      |      |      |      |      |      |      |      |       |      |      |       |      |      |      |      |      |      |      |      |      |          |    |    |    |    |    |     |    |      |                  |    |                   |                   |  |                       |                   |  |    |                   |                  |    |    |                   |     |     |  |           |       |     |       |       |       |     |       |     |     |      |      |       |  |     |      |  |      |      |       |      |      |      |       |  |  |
| Frac. Inten. (% of TIC)                                                                                                                                                                                                                                                                                                                                                                                                                                                                                                                                                                                                                                                                                                                                                                                                                                                                                                                                                                                                                                                                                                                                                                                                                                                                                                                                                                                                                                                                                                                                                                                                                                                                                                                                                                                                                                                                                                                                                                                                                                                                                                                                                                                                                                                                                                                                                                                                                                                                                                                                                                                                                                                                                                                | 0.00   | 0.12    | 0.09   | 2.81             | 3.39           | 4.50                                                                    | 3.58                            | 2.46                       | 3.29                        | 4.96               | 2.95                  | 13.65                 | 2.16              | 4.87                                                                      | 15.02                 | 2.87                  | 2.62    | 4.05                  | 3.09             | 4.58     | 4.49     | 2.50                   | 5.10     | 2.74                  | 4.13     |                       |                       |         |                       |                       |                       |         |                       |         |          |          |                        |          |          |          |                         |      |      |      |      |      |      |      |      |      |      |      |       |      |      |       |      |      |      |      |      |      |      |      |      |      |                       |      |      |      |       |       |       |       |       |       |       |       |       |       |       |        |       |       |       |       |       |       |       |       |       |       |       |      |      |      |      |      |      |      |      |      |      |      |      |       |      |      |       |      |      |      |      |      |      |      |      |      |          |    |    |    |    |    |     |    |      |                  |    |                   |                   |  |                       |                   |  |    |                   |                  |    |    |                   |     |     |  |           |       |     |       |       |       |     |       |     |     |      |      |       |  |     |      |  |      |      |       |      |      |      |       |  |  |
| Rel. Inten. (% of BP)                                                                                                                                                                                                                                                                                                                                                                                                                                                                                                                                                                                                                                                                                                                                                                                                                                                                                                                                                                                                                                                                                                                                                                                                                                                                                                                                                                                                                                                                                                                                                                                                                                                                                                                                                                                                                                                                                                                                                                                                                                                                                                                                                                                                                                                                                                                                                                                                                                                                                                                                                                                                                                                                                                                  | 0.02   | 0.77    | 0.09   | 18.71            | 22.54          | 29.92                                                                   | 23.81                           | 16.38                      | 21.90                       | 33.00              | 19.63                 | 90.85                 | 14.35             | 32.40                                                                     | 100.00                | 19.09                 | 17.46   | 26.94                 | 20.56            | 30.49    | 29.87    | 16.63                  | 33.97    | 18.27                 | 27.52    |                       |                       |         |                       |                       |                       |         |                       |         |          |          |                        |          |          |          |                         |      |      |      |      |      |      |      |      |      |      |      |       |      |      |       |      |      |      |      |      |      |      |      |      |      |                       |      |      |      |       |       |       |       |       |       |       |       |       |       |       |        |       |       |       |       |       |       |       |       |       |       |       |      |      |      |      |      |      |      |      |      |      |      |      |       |      |      |       |      |      |      |      |      |      |      |      |      |          |    |    |    |    |    |     |    |      |                  |    |                   |                   |  |                       |                   |  |    |                   |                  |    |    |                   |     |     |  |           |       |     |       |       |       |     |       |     |     |      |      |       |  |     |      |  |      |      |       |      |      |      |       |  |  |
| Score                                                                                                                                                                                                                                                                                                                                                                                                                                                                                                                                                                                                                                                                                                                                                                                                                                                                                                                                                                                                                                                                                                                                                                                                                                                                                                                                                                                                                                                                                                                                                                                                                                                                                                                                                                                                                                                                                                                                                                                                                                                                                                                                                                                                                                                                                                                                                                                                                                                                                                                                                                                                                                                                                                                                  | 0.20   | 0.50    | 0.22   | 1.50             | 1.50           | 0.75                                                                    | 0.75                            | 0.75                       | 0.50                        | 0.50               | 0.50                  | 1.50                  | -0.14             | 0.50                                                                      | 1.50                  | -0.19                 | 1.50    | 0.50                  | 0.50             | 1.50     | 0.50     | 1.50                   | 1.50     | 1.50                  | 10.5     |                       |                       |         |                       |                       |                       |         |                       |         |          |          |                        |          |          |          |                         |      |      |      |      |      |      |      |      |      |      |      |       |      |      |       |      |      |      |      |      |      |      |      |      |      |                       |      |      |      |       |       |       |       |       |       |       |       |       |       |       |        |       |       |       |       |       |       |       |       |       |       |       |      |      |      |      |      |      |      |      |      |      |      |      |       |      |      |       |      |      |      |      |      |      |      |      |      |          |    |    |    |    |    |     |    |      |                  |    |                   |                   |  |                       |                   |  |    |                   |                  |    |    |                   |     |     |  |           |       |     |       |       |       |     |       |     |     |      |      |       |  |     |      |  |      |      |       |      |      |      |       |  |  |
| Ion-type                                                                                                                                                                                                                                                                                                                                                                                                                                                                                                                                                                                                                                                                                                                                                                                                                                                                                                                                                                                                                                                                                                                                                                                                                                                                                                                                                                                                                                                                                                                                                                                                                                                                                                                                                                                                                                                                                                                                                                                                                                                                                                                                                                                                                                                                                                                                                                                                                                                                                                                                                                                                                                                                                                                               | PR     | KQ      | LI     | y1               | y2             | DPT                                                                     | b3                              | IFGN                       | bb <sup>+2</sup>            | ba                 | y11 <sup>+2</sup>     | y11 <sup>+2</sup>     |                   | y14-H2O <sup>+2</sup>                                                     | y14 <sup>+2</sup>     |                       | y7      | y15 <sup>+2</sup>     | bb <sup>+2</sup> | y9       | bb       | y20 <sup>+2</sup>      | y11      | y14                   |          |                       |                       |         |                       |                       |                       |         |                       |         |          |          |                        |          |          |          |                         |      |      |      |      |      |      |      |      |      |      |      |       |      |      |       |      |      |      |      |      |      |      |      |      |      |                       |      |      |      |       |       |       |       |       |       |       |       |       |       |       |        |       |       |       |       |       |       |       |       |       |       |       |      |      |      |      |      |      |      |      |      |      |      |      |       |      |      |       |      |      |      |      |      |      |      |      |      |          |    |    |    |    |    |     |    |      |                  |    |                   |                   |  |                       |                   |  |    |                   |                  |    |    |                   |     |     |  |           |       |     |       |       |       |     |       |     |     |      |      |       |  |     |      |  |      |      |       |      |      |      |       |  |  |
| Delta ppm                                                                                                                                                                                                                                                                                                                                                                                                                                                                                                                                                                                                                                                                                                                                                                                                                                                                                                                                                                                                                                                                                                                                                                                                                                                                                                                                                                                                                                                                                                                                                                                                                                                                                                                                                                                                                                                                                                                                                                                                                                                                                                                                                                                                                                                                                                                                                                                                                                                                                                                                                                                                                                                                                                                              | -24.6  | 6.6     | -34.0  | -31.3            | -12.5          | 0.1                                                                     | -16.7                           | 8.4                        | 7.8                         | 13.6               | 17.5                  | -13.8                 |                   | 7.9                                                                       | -2.4                  |                       | -7.0    | 27.9                  | -22.5            | -9.8     | -4.7     | -7.8                   | -11.5    |                       |          |                       |                       |         |                       |                       |                       |         |                       |         |          |          |                        |          |          |          |                         |      |      |      |      |      |      |      |      |      |      |      |       |      |      |       |      |      |      |      |      |      |      |      |      |      |                       |      |      |      |       |       |       |       |       |       |       |       |       |       |       |        |       |       |       |       |       |       |       |       |       |       |       |      |      |      |      |      |      |      |      |      |      |      |      |       |      |      |       |      |      |      |      |      |      |      |      |      |          |    |    |    |    |    |     |    |      |                  |    |                   |                   |  |                       |                   |  |    |                   |                  |    |    |                   |     |     |  |           |       |     |       |       |       |     |       |     |     |      |      |       |  |     |      |  |      |      |       |      |      |      |       |  |  |

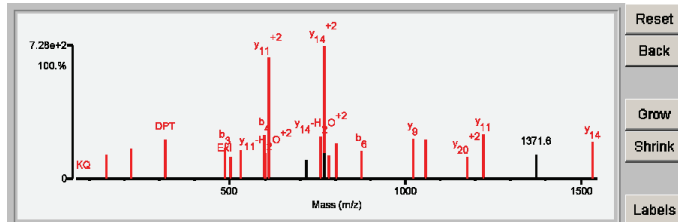

Result Summary

| Rank | Score | SPI (%) | BCS | # Unmatched Ions | Variable sites | Sequence                                 | MH <sup>+</sup> Calculated (Da) | MH <sup>+</sup> Error (Da) | MH <sup>+</sup> Error (ppm) | Protein MW/pl (Da) | Species | Accession # | Protein Name                                                                     |
|------|-------|---------|-----|------------------|----------------|------------------------------------------|---------------------------------|----------------------------|-----------------------------|--------------------|---------|-------------|----------------------------------------------------------------------------------|
| 1    | 16.07 | 81.0    | 7   | 7/25             | K793k          | (R)S A A D S I S E S V P V G P K V R (D) | 1698.9021                       | 114.0555                   | 6.9                         | 95786.8/4.91       | HUMAN   | P45974      | Ubiquitin carboxyl-terminal hydrolase 5 OS=Homo sapiens GN=USP5 PE=1 SV=2        |
| 2    | 3.43  | 52.1    | 1   | 18/25            | K2292k K2297k  | (K)K S G S A K C Y E K S L V K (N)       | 1584.8414                       | 228.1161                   | 16.7                        | 248073.6/8.45      | HUMAN   | RQ5D862     | REVERSE Filaggrin-2 OS=Homo sapiens GN=FLG2 PE=1 SV=1                            |
| 3    | 3.42  | 56.9    | 1   | 15/25            | K19k           | (K)L P S A R L Q Q L S I E E S K (E)     | 1698.9385                       | 114.0191                   | -13.2                       | 60459.2/8.63       | HUMAN   | RA6NK97     | REVERSE Solute carrier family 22 member 20 OS=Homo sapiens GN=SLC22A20 PE=2 SV=1 |

Detailed Results

| Rank                                                                                                                                                                                                                                                                                                                                                                                                                                                                                                                                                                                                                                                                                                                                                                                                                                                                                                                                                                                                                                                                                                                                                                                                                                                                                                                                                                                                                                                                                                                                                                                                                                                                                                                                                                                                                                                                                                                                                                                                                                                                                                                                                                                                                                                                                                                                                                                                                                                                                                                                                                                      | Score  | SPI (%) | BCS    | # Unmatched Ions | Variable sites | Sequence                                  | MH <sup>+</sup> Calculated (Da) | MH <sup>+</sup> Error (Da) | MH <sup>+</sup> Error (ppm) | Protein MW/pl (Da) | Species | Accession #      | MS-Digest Index # | Protein Name                                                              |                    |         |         |                       |                       |         |         |                   |                       |         |         |         |         |         |                       |         |         |         |                       |                       |         |         |         |                       |         |         |                        |      |      |      |      |      |      |      |      |      |      |      |      |      |      |      |      |      |      |       |      |      |      |      |      |       |                      |      |      |       |      |       |       |       |      |       |      |      |       |      |      |      |       |      |       |       |       |       |       |       |      |        |       |      |      |       |      |      |      |      |      |      |      |      |       |       |      |       |       |      |       |      |      |      |      |      |      |      |          |    |   |    |    |    |       |    |    |    |    |    |                  |    |                  |    |    |    |                   |    |    |    |                   |        |    |           |     |       |  |      |       |       |       |       |  |       |     |  |  |       |  |  |      |      |  |      |      |     |       |      |     |
|-------------------------------------------------------------------------------------------------------------------------------------------------------------------------------------------------------------------------------------------------------------------------------------------------------------------------------------------------------------------------------------------------------------------------------------------------------------------------------------------------------------------------------------------------------------------------------------------------------------------------------------------------------------------------------------------------------------------------------------------------------------------------------------------------------------------------------------------------------------------------------------------------------------------------------------------------------------------------------------------------------------------------------------------------------------------------------------------------------------------------------------------------------------------------------------------------------------------------------------------------------------------------------------------------------------------------------------------------------------------------------------------------------------------------------------------------------------------------------------------------------------------------------------------------------------------------------------------------------------------------------------------------------------------------------------------------------------------------------------------------------------------------------------------------------------------------------------------------------------------------------------------------------------------------------------------------------------------------------------------------------------------------------------------------------------------------------------------------------------------------------------------------------------------------------------------------------------------------------------------------------------------------------------------------------------------------------------------------------------------------------------------------------------------------------------------------------------------------------------------------------------------------------------------------------------------------------------------|--------|---------|--------|------------------|----------------|-------------------------------------------|---------------------------------|----------------------------|-----------------------------|--------------------|---------|------------------|-------------------|---------------------------------------------------------------------------|--------------------|---------|---------|-----------------------|-----------------------|---------|---------|-------------------|-----------------------|---------|---------|---------|---------|---------|-----------------------|---------|---------|---------|-----------------------|-----------------------|---------|---------|---------|-----------------------|---------|---------|------------------------|------|------|------|------|------|------|------|------|------|------|------|------|------|------|------|------|------|------|-------|------|------|------|------|------|-------|----------------------|------|------|-------|------|-------|-------|-------|------|-------|------|------|-------|------|------|------|-------|------|-------|-------|-------|-------|-------|-------|------|--------|-------|------|------|-------|------|------|------|------|------|------|------|------|-------|-------|------|-------|-------|------|-------|------|------|------|------|------|------|------|----------|----|---|----|----|----|-------|----|----|----|----|----|------------------|----|------------------|----|----|----|-------------------|----|----|----|-------------------|--------|----|-----------|-----|-------|--|------|-------|-------|-------|-------|--|-------|-----|--|--|-------|--|--|------|------|--|------|------|-----|-------|------|-----|
| 1                                                                                                                                                                                                                                                                                                                                                                                                                                                                                                                                                                                                                                                                                                                                                                                                                                                                                                                                                                                                                                                                                                                                                                                                                                                                                                                                                                                                                                                                                                                                                                                                                                                                                                                                                                                                                                                                                                                                                                                                                                                                                                                                                                                                                                                                                                                                                                                                                                                                                                                                                                                         | 16.07  | 81.0    | 7      | 7/25             | K793k          | (R) S A A D S I S E S V P V G P K V R (D) | 1698.9021                       | 114.0555                   | 6.9                         | 95786.8/4.91       | HUMAN   | P45974           | 815359            | Ubiquitin carboxyl-terminal hydrolase 5 OS=Homo sapiens GN=USP5 PE=1 SV=2 |                    |         |         |                       |                       |         |         |                   |                       |         |         |         |         |         |                       |         |         |         |                       |                       |         |         |         |                       |         |         |                        |      |      |      |      |      |      |      |      |      |      |      |      |      |      |      |      |      |      |       |      |      |      |      |      |       |                      |      |      |       |      |       |       |       |      |       |      |      |       |      |      |      |       |      |       |       |       |       |       |       |      |        |       |      |      |       |      |      |      |      |      |      |      |      |       |       |      |       |       |      |       |      |      |      |      |      |      |      |          |    |   |    |    |    |       |    |    |    |    |    |                  |    |                  |    |    |    |                   |    |    |    |                   |        |    |           |     |       |  |      |       |       |       |       |  |       |     |  |  |       |  |  |      |      |  |      |      |     |       |      |     |
| <table border="1"> <thead> <tr> <th>Fragment-ion (m/z)</th> <th>70.065</th> <th>72.079</th> <th>84.078</th> <th>86.096</th> <th>131.079</th> <th>159.076</th> <th>169.130</th> <th>175.112</th> <th>185.091</th> <th>197.124</th> <th>217.084</th> <th>286.099</th> <th>298.172</th> <th>307.185<sup>+2</sup></th> <th>324.149</th> <th>338.171</th> <th>345.141</th> <th>385.176<sup>+2</sup></th> <th>433.759<sup>+2</sup></th> <th>613.384</th> <th>670.411</th> <th>769.473</th> <th>827.932<sup>+2</sup></th> <th>830.370</th> <th>866.525</th> </tr> </thead> <tbody> <tr> <td>Frac. Inten.(% of TIC)</td> <td>0.01</td> <td>0.20</td> <td>4.93</td> <td>0.11</td> <td>9.59</td> <td>5.92</td> <td>2.45</td> <td>1.79</td> <td>3.07</td> <td>2.00</td> <td>2.15</td> <td>2.27</td> <td>1.65</td> <td>2.12</td> <td>2.20</td> <td>2.26</td> <td>2.23</td> <td>2.65</td> <td>11.38</td> <td>3.69</td> <td>5.94</td> <td>4.69</td> <td>2.46</td> <td>1.92</td> <td>22.33</td> </tr> <tr> <td>Rel. Inten.(% of BP)</td> <td>0.02</td> <td>0.91</td> <td>22.07</td> <td>0.51</td> <td>42.94</td> <td>26.50</td> <td>10.96</td> <td>8.00</td> <td>13.72</td> <td>8.96</td> <td>9.61</td> <td>10.17</td> <td>7.38</td> <td>9.50</td> <td>9.84</td> <td>10.13</td> <td>9.99</td> <td>11.85</td> <td>50.97</td> <td>16.52</td> <td>26.62</td> <td>20.99</td> <td>11.02</td> <td>8.58</td> <td>100.00</td> </tr> <tr> <td>Score</td> <td>0.20</td> <td>0.50</td> <td>-0.22</td> <td>0.22</td> <td>0.50</td> <td>0.50</td> <td>0.50</td> <td>1.50</td> <td>0.75</td> <td>0.75</td> <td>0.75</td> <td>-0.10</td> <td>-0.07</td> <td>1.50</td> <td>-0.10</td> <td>-0.10</td> <td>0.75</td> <td>-0.12</td> <td>1.50</td> <td>1.50</td> <td>1.50</td> <td>1.50</td> <td>1.50</td> <td>0.25</td> <td>1.50</td> </tr> <tr> <td>Ion-type</td> <td>PR</td> <td>V</td> <td>LI</td> <td>a2</td> <td>b2</td> <td>PV-28</td> <td>y1</td> <td>PV</td> <td>ES</td> <td>ES</td> <td>ES</td> <td>y4<sup>+2</sup></td> <td>b4</td> <td>y7<sup>+2</sup></td> <td>y4</td> <td>y5</td> <td>y6</td> <td>y15<sup>+2</sup></td> <td>y4</td> <td>y5</td> <td>y6</td> <td>y15<sup>+2</sup></td> <td>b9-H2O</td> <td>y7</td> </tr> <tr> <td>Delta ppm</td> <td>3.9</td> <td>-21.9</td> <td></td> <td>-1.5</td> <td>-29.0</td> <td>-11.4</td> <td>-28.0</td> <td>-38.0</td> <td></td> <td>-29.7</td> <td>3.7</td> <td></td> <td></td> <td>-23.6</td> <td></td> <td></td> <td>AADS</td> <td>-2.2</td> <td></td> <td>10.4</td> <td>17.8</td> <td>6.4</td> <td>-11.6</td> <td>19.0</td> <td>5.1</td> </tr> </tbody> </table> |        |         |        |                  |                |                                           |                                 |                            |                             |                    |         |                  |                   |                                                                           | Fragment-ion (m/z) | 70.065  | 72.079  | 84.078                | 86.096                | 131.079 | 159.076 | 169.130           | 175.112               | 185.091 | 197.124 | 217.084 | 286.099 | 298.172 | 307.185 <sup>+2</sup> | 324.149 | 338.171 | 345.141 | 385.176 <sup>+2</sup> | 433.759 <sup>+2</sup> | 613.384 | 670.411 | 769.473 | 827.932 <sup>+2</sup> | 830.370 | 866.525 | Frac. Inten.(% of TIC) | 0.01 | 0.20 | 4.93 | 0.11 | 9.59 | 5.92 | 2.45 | 1.79 | 3.07 | 2.00 | 2.15 | 2.27 | 1.65 | 2.12 | 2.20 | 2.26 | 2.23 | 2.65 | 11.38 | 3.69 | 5.94 | 4.69 | 2.46 | 1.92 | 22.33 | Rel. Inten.(% of BP) | 0.02 | 0.91 | 22.07 | 0.51 | 42.94 | 26.50 | 10.96 | 8.00 | 13.72 | 8.96 | 9.61 | 10.17 | 7.38 | 9.50 | 9.84 | 10.13 | 9.99 | 11.85 | 50.97 | 16.52 | 26.62 | 20.99 | 11.02 | 8.58 | 100.00 | Score | 0.20 | 0.50 | -0.22 | 0.22 | 0.50 | 0.50 | 0.50 | 1.50 | 0.75 | 0.75 | 0.75 | -0.10 | -0.07 | 1.50 | -0.10 | -0.10 | 0.75 | -0.12 | 1.50 | 1.50 | 1.50 | 1.50 | 1.50 | 0.25 | 1.50 | Ion-type | PR | V | LI | a2 | b2 | PV-28 | y1 | PV | ES | ES | ES | y4 <sup>+2</sup> | b4 | y7 <sup>+2</sup> | y4 | y5 | y6 | y15 <sup>+2</sup> | y4 | y5 | y6 | y15 <sup>+2</sup> | b9-H2O | y7 | Delta ppm | 3.9 | -21.9 |  | -1.5 | -29.0 | -11.4 | -28.0 | -38.0 |  | -29.7 | 3.7 |  |  | -23.6 |  |  | AADS | -2.2 |  | 10.4 | 17.8 | 6.4 | -11.6 | 19.0 | 5.1 |
| Fragment-ion (m/z)                                                                                                                                                                                                                                                                                                                                                                                                                                                                                                                                                                                                                                                                                                                                                                                                                                                                                                                                                                                                                                                                                                                                                                                                                                                                                                                                                                                                                                                                                                                                                                                                                                                                                                                                                                                                                                                                                                                                                                                                                                                                                                                                                                                                                                                                                                                                                                                                                                                                                                                                                                        | 70.065 | 72.079  | 84.078 | 86.096           | 131.079        | 159.076                                   | 169.130                         | 175.112                    | 185.091                     | 197.124            | 217.084 | 286.099          | 298.172           | 307.185 <sup>+2</sup>                                                     | 324.149            | 338.171 | 345.141 | 385.176 <sup>+2</sup> | 433.759 <sup>+2</sup> | 613.384 | 670.411 | 769.473           | 827.932 <sup>+2</sup> | 830.370 | 866.525 |         |         |         |                       |         |         |         |                       |                       |         |         |         |                       |         |         |                        |      |      |      |      |      |      |      |      |      |      |      |      |      |      |      |      |      |      |       |      |      |      |      |      |       |                      |      |      |       |      |       |       |       |      |       |      |      |       |      |      |      |       |      |       |       |       |       |       |       |      |        |       |      |      |       |      |      |      |      |      |      |      |      |       |       |      |       |       |      |       |      |      |      |      |      |      |      |          |    |   |    |    |    |       |    |    |    |    |    |                  |    |                  |    |    |    |                   |    |    |    |                   |        |    |           |     |       |  |      |       |       |       |       |  |       |     |  |  |       |  |  |      |      |  |      |      |     |       |      |     |
| Frac. Inten.(% of TIC)                                                                                                                                                                                                                                                                                                                                                                                                                                                                                                                                                                                                                                                                                                                                                                                                                                                                                                                                                                                                                                                                                                                                                                                                                                                                                                                                                                                                                                                                                                                                                                                                                                                                                                                                                                                                                                                                                                                                                                                                                                                                                                                                                                                                                                                                                                                                                                                                                                                                                                                                                                    | 0.01   | 0.20    | 4.93   | 0.11             | 9.59           | 5.92                                      | 2.45                            | 1.79                       | 3.07                        | 2.00               | 2.15    | 2.27             | 1.65              | 2.12                                                                      | 2.20               | 2.26    | 2.23    | 2.65                  | 11.38                 | 3.69    | 5.94    | 4.69              | 2.46                  | 1.92    | 22.33   |         |         |         |                       |         |         |         |                       |                       |         |         |         |                       |         |         |                        |      |      |      |      |      |      |      |      |      |      |      |      |      |      |      |      |      |      |       |      |      |      |      |      |       |                      |      |      |       |      |       |       |       |      |       |      |      |       |      |      |      |       |      |       |       |       |       |       |       |      |        |       |      |      |       |      |      |      |      |      |      |      |      |       |       |      |       |       |      |       |      |      |      |      |      |      |      |          |    |   |    |    |    |       |    |    |    |    |    |                  |    |                  |    |    |    |                   |    |    |    |                   |        |    |           |     |       |  |      |       |       |       |       |  |       |     |  |  |       |  |  |      |      |  |      |      |     |       |      |     |
| Rel. Inten.(% of BP)                                                                                                                                                                                                                                                                                                                                                                                                                                                                                                                                                                                                                                                                                                                                                                                                                                                                                                                                                                                                                                                                                                                                                                                                                                                                                                                                                                                                                                                                                                                                                                                                                                                                                                                                                                                                                                                                                                                                                                                                                                                                                                                                                                                                                                                                                                                                                                                                                                                                                                                                                                      | 0.02   | 0.91    | 22.07  | 0.51             | 42.94          | 26.50                                     | 10.96                           | 8.00                       | 13.72                       | 8.96               | 9.61    | 10.17            | 7.38              | 9.50                                                                      | 9.84               | 10.13   | 9.99    | 11.85                 | 50.97                 | 16.52   | 26.62   | 20.99             | 11.02                 | 8.58    | 100.00  |         |         |         |                       |         |         |         |                       |                       |         |         |         |                       |         |         |                        |      |      |      |      |      |      |      |      |      |      |      |      |      |      |      |      |      |      |       |      |      |      |      |      |       |                      |      |      |       |      |       |       |       |      |       |      |      |       |      |      |      |       |      |       |       |       |       |       |       |      |        |       |      |      |       |      |      |      |      |      |      |      |      |       |       |      |       |       |      |       |      |      |      |      |      |      |      |          |    |   |    |    |    |       |    |    |    |    |    |                  |    |                  |    |    |    |                   |    |    |    |                   |        |    |           |     |       |  |      |       |       |       |       |  |       |     |  |  |       |  |  |      |      |  |      |      |     |       |      |     |
| Score                                                                                                                                                                                                                                                                                                                                                                                                                                                                                                                                                                                                                                                                                                                                                                                                                                                                                                                                                                                                                                                                                                                                                                                                                                                                                                                                                                                                                                                                                                                                                                                                                                                                                                                                                                                                                                                                                                                                                                                                                                                                                                                                                                                                                                                                                                                                                                                                                                                                                                                                                                                     | 0.20   | 0.50    | -0.22  | 0.22             | 0.50           | 0.50                                      | 0.50                            | 1.50                       | 0.75                        | 0.75               | 0.75    | -0.10            | -0.07             | 1.50                                                                      | -0.10              | -0.10   | 0.75    | -0.12                 | 1.50                  | 1.50    | 1.50    | 1.50              | 1.50                  | 0.25    | 1.50    |         |         |         |                       |         |         |         |                       |                       |         |         |         |                       |         |         |                        |      |      |      |      |      |      |      |      |      |      |      |      |      |      |      |      |      |      |       |      |      |      |      |      |       |                      |      |      |       |      |       |       |       |      |       |      |      |       |      |      |      |       |      |       |       |       |       |       |       |      |        |       |      |      |       |      |      |      |      |      |      |      |      |       |       |      |       |       |      |       |      |      |      |      |      |      |      |          |    |   |    |    |    |       |    |    |    |    |    |                  |    |                  |    |    |    |                   |    |    |    |                   |        |    |           |     |       |  |      |       |       |       |       |  |       |     |  |  |       |  |  |      |      |  |      |      |     |       |      |     |
| Ion-type                                                                                                                                                                                                                                                                                                                                                                                                                                                                                                                                                                                                                                                                                                                                                                                                                                                                                                                                                                                                                                                                                                                                                                                                                                                                                                                                                                                                                                                                                                                                                                                                                                                                                                                                                                                                                                                                                                                                                                                                                                                                                                                                                                                                                                                                                                                                                                                                                                                                                                                                                                                  | PR     | V       | LI     | a2               | b2             | PV-28                                     | y1                              | PV                         | ES                          | ES                 | ES      | y4 <sup>+2</sup> | b4                | y7 <sup>+2</sup>                                                          | y4                 | y5      | y6      | y15 <sup>+2</sup>     | y4                    | y5      | y6      | y15 <sup>+2</sup> | b9-H2O                | y7      |         |         |         |         |                       |         |         |         |                       |                       |         |         |         |                       |         |         |                        |      |      |      |      |      |      |      |      |      |      |      |      |      |      |      |      |      |      |       |      |      |      |      |      |       |                      |      |      |       |      |       |       |       |      |       |      |      |       |      |      |      |       |      |       |       |       |       |       |       |      |        |       |      |      |       |      |      |      |      |      |      |      |      |       |       |      |       |       |      |       |      |      |      |      |      |      |      |          |    |   |    |    |    |       |    |    |    |    |    |                  |    |                  |    |    |    |                   |    |    |    |                   |        |    |           |     |       |  |      |       |       |       |       |  |       |     |  |  |       |  |  |      |      |  |      |      |     |       |      |     |
| Delta ppm                                                                                                                                                                                                                                                                                                                                                                                                                                                                                                                                                                                                                                                                                                                                                                                                                                                                                                                                                                                                                                                                                                                                                                                                                                                                                                                                                                                                                                                                                                                                                                                                                                                                                                                                                                                                                                                                                                                                                                                                                                                                                                                                                                                                                                                                                                                                                                                                                                                                                                                                                                                 | 3.9    | -21.9   |        | -1.5             | -29.0          | -11.4                                     | -28.0                           | -38.0                      |                             | -29.7              | 3.7     |                  |                   | -23.6                                                                     |                    |         | AADS    | -2.2                  |                       | 10.4    | 17.8    | 6.4               | -11.6                 | 19.0    | 5.1     |         |         |         |                       |         |         |         |                       |                       |         |         |         |                       |         |         |                        |      |      |      |      |      |      |      |      |      |      |      |      |      |      |      |      |      |      |       |      |      |      |      |      |       |                      |      |      |       |      |       |       |       |      |       |      |      |       |      |      |      |       |      |       |       |       |       |       |       |      |        |       |      |      |       |      |      |      |      |      |      |      |      |       |       |      |       |       |      |       |      |      |      |      |      |      |      |          |    |   |    |    |    |       |    |    |    |    |    |                  |    |                  |    |    |    |                   |    |    |    |                   |        |    |           |     |       |  |      |       |       |       |       |  |       |     |  |  |       |  |  |      |      |  |      |      |     |       |      |     |

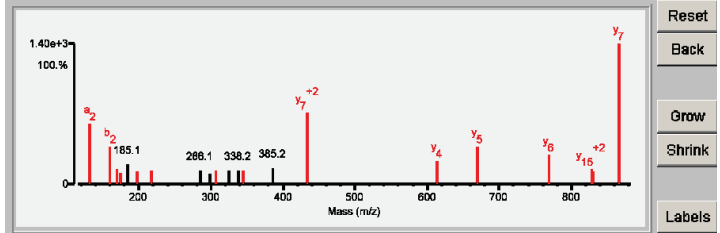

Result Summary

| Rank | Score | SPI (%) | BCS | # Unmatched Ions | Variable sites | Sequence                                  | MH <sup>+</sup> Calculated (Da) | MH <sup>+</sup> Error (Da) | MH <sup>+</sup> Error (ppm) | Protein MW/pi (Da) | Species | Accession # | Protein Name                                                                        |
|------|-------|---------|-----|------------------|----------------|-------------------------------------------|---------------------------------|----------------------------|-----------------------------|--------------------|---------|-------------|-------------------------------------------------------------------------------------|
| 1    | 12.68 | 66.6    | 8   | 9/25             | K115k          | (K)LGFDGSLV <b>K</b> QFL <b>S</b> ETEK(M) | 2027.0332                       | 114.0647                   | 10.2                        | 24824.5/5.33       | HUMAN   | P09936      | Ubiquitin carboxyl-terminal hydrolase isozyme L1 OS=Homo sapiens GN=UCHL1 PE=1 SV=2 |

Detailed Results

| Rank                                                                                                                                                                                                                                                                                                                                                                                                                                                                                                                                                                                                                                                                                                                                                                                                                                                                                                                                                                                                                                                                                                                                                                                                                                                                                                                                                                                                                                                                                                                                                                                                                                                                                                                                                                                                                                                                                                                                                                                                                                                                                                                                                                                                                                                                                                                                                                                                                                                                                                                                                                                                                                                                                                                                                                                                                                                                                                                       | Score  | SPI (%) | BCS     | # Unmatched Ions | Variable sites | Sequence                                                  | MH <sup>+</sup> Calculated (Da) | MH <sup>+</sup> Error (Da) | MH <sup>+</sup> Error (ppm) | Protein MW/pi (Da) | Species | Accession #      | MS-Digest Index #     | Protein Name                                                                        |                    |         |                       |                   |                       |                       |                       |         |                   |         |                        |         |         |                       |         |         |         |                       |         |                       |         |                       |         |         |         |                        |                        |      |      |      |      |      |      |      |      |      |      |      |      |      |      |      |      |      |      |      |      |      |      |      |      |      |                      |      |       |      |       |       |       |       |       |       |       |       |       |       |       |       |       |       |       |       |       |       |       |        |       |       |       |      |      |      |       |       |       |       |      |      |       |       |      |      |       |      |      |       |      |      |      |      |      |      |      |       |          |    |    |   |  |  |  |    |    |  |    |  |                  |                  |  |    |        |        |                   |    |                       |                      |    |                   |  |           |      |      |      |     |  |  |      |      |       |  |  |     |      |  |       |      |       |     |       |      |     |       |      |      |  |    |  |  |  |  |  |  |  |  |  |  |  |  |  |        |     |  |  |  |  |  |  |  |  |  |
|----------------------------------------------------------------------------------------------------------------------------------------------------------------------------------------------------------------------------------------------------------------------------------------------------------------------------------------------------------------------------------------------------------------------------------------------------------------------------------------------------------------------------------------------------------------------------------------------------------------------------------------------------------------------------------------------------------------------------------------------------------------------------------------------------------------------------------------------------------------------------------------------------------------------------------------------------------------------------------------------------------------------------------------------------------------------------------------------------------------------------------------------------------------------------------------------------------------------------------------------------------------------------------------------------------------------------------------------------------------------------------------------------------------------------------------------------------------------------------------------------------------------------------------------------------------------------------------------------------------------------------------------------------------------------------------------------------------------------------------------------------------------------------------------------------------------------------------------------------------------------------------------------------------------------------------------------------------------------------------------------------------------------------------------------------------------------------------------------------------------------------------------------------------------------------------------------------------------------------------------------------------------------------------------------------------------------------------------------------------------------------------------------------------------------------------------------------------------------------------------------------------------------------------------------------------------------------------------------------------------------------------------------------------------------------------------------------------------------------------------------------------------------------------------------------------------------------------------------------------------------------------------------------------------------|--------|---------|---------|------------------|----------------|-----------------------------------------------------------|---------------------------------|----------------------------|-----------------------------|--------------------|---------|------------------|-----------------------|-------------------------------------------------------------------------------------|--------------------|---------|-----------------------|-------------------|-----------------------|-----------------------|-----------------------|---------|-------------------|---------|------------------------|---------|---------|-----------------------|---------|---------|---------|-----------------------|---------|-----------------------|---------|-----------------------|---------|---------|---------|------------------------|------------------------|------|------|------|------|------|------|------|------|------|------|------|------|------|------|------|------|------|------|------|------|------|------|------|------|------|----------------------|------|-------|------|-------|-------|-------|-------|-------|-------|-------|-------|-------|-------|-------|-------|-------|-------|-------|-------|-------|-------|-------|--------|-------|-------|-------|------|------|------|-------|-------|-------|-------|------|------|-------|-------|------|------|-------|------|------|-------|------|------|------|------|------|------|------|-------|----------|----|----|---|--|--|--|----|----|--|----|--|------------------|------------------|--|----|--------|--------|-------------------|----|-----------------------|----------------------|----|-------------------|--|-----------|------|------|------|-----|--|--|------|------|-------|--|--|-----|------|--|-------|------|-------|-----|-------|------|-----|-------|------|------|--|----|--|--|--|--|--|--|--|--|--|--|--|--|--|--------|-----|--|--|--|--|--|--|--|--|--|
| 1                                                                                                                                                                                                                                                                                                                                                                                                                                                                                                                                                                                                                                                                                                                                                                                                                                                                                                                                                                                                                                                                                                                                                                                                                                                                                                                                                                                                                                                                                                                                                                                                                                                                                                                                                                                                                                                                                                                                                                                                                                                                                                                                                                                                                                                                                                                                                                                                                                                                                                                                                                                                                                                                                                                                                                                                                                                                                                                          | 12.68  | 66.6    | 8       | 9/25             | K115k          | (K) L G F E D / G S V L / K / Q / F / L / S E / T E K (M) | 2027.0332                       | 114.0647                   | 10.2                        | 24824.5/5.33       | HUMAN   | P09936           | 815711                | Ubiquitin carboxyl-terminal hydrolase isozyme L1 OS=Homo sapiens GN=UCHL1 PE=1 SV=2 |                    |         |                       |                   |                       |                       |                       |         |                   |         |                        |         |         |                       |         |         |         |                       |         |                       |         |                       |         |         |         |                        |                        |      |      |      |      |      |      |      |      |      |      |      |      |      |      |      |      |      |      |      |      |      |      |      |      |      |                      |      |       |      |       |       |       |       |       |       |       |       |       |       |       |       |       |       |       |       |       |       |       |        |       |       |       |      |      |      |       |       |       |       |      |      |       |       |      |      |       |      |      |       |      |      |      |      |      |      |      |       |          |    |    |   |  |  |  |    |    |  |    |  |                  |                  |  |    |        |        |                   |    |                       |                      |    |                   |  |           |      |      |      |     |  |  |      |      |       |  |  |     |      |  |       |      |       |     |       |      |     |       |      |      |  |    |  |  |  |  |  |  |  |  |  |  |  |  |  |        |     |  |  |  |  |  |  |  |  |  |
| <table border="1"> <thead> <tr> <th>Fragment-ion (m/z)</th> <th>84.083</th> <th>86.097</th> <th>120.081</th> <th>153.060</th> <th>171.104</th> <th>177.102</th> <th>353.139</th> <th>356.238</th> <th>377.193</th> <th>386.193</th> <th>458.230</th> <th>593.281</th> <th>612.324<sup>+2</sup></th> <th>631.396</th> <th>706.344</th> <th>727.407</th> <th>781.370<sup>+2</sup></th> <th>787.363</th> <th>790.404<sup>+2</sup></th> <th>853.427</th> <th>903.942<sup>+2</sup></th> <th>963.454</th> <th>981.486</th> <th>986.001</th> <th>1015.007<sup>+2</sup></th> </tr> </thead> <tbody> <tr> <td>Frac. Inten.(% of TIC)</td> <td>0.26</td> <td>4.08</td> <td>0.31</td> <td>3.83</td> <td>4.03</td> <td>3.28</td> <td>3.21</td> <td>2.77</td> <td>5.52</td> <td>2.78</td> <td>2.72</td> <td>7.38</td> <td>7.13</td> <td>3.44</td> <td>4.38</td> <td>2.67</td> <td>3.37</td> <td>3.50</td> <td>3.75</td> <td>6.36</td> <td>2.55</td> <td>4.53</td> <td>8.22</td> <td>3.19</td> <td>6.74</td> </tr> <tr> <td>Rel. Inten.(% of BP)</td> <td>3.13</td> <td>49.63</td> <td>3.77</td> <td>46.65</td> <td>49.03</td> <td>39.91</td> <td>39.05</td> <td>33.74</td> <td>67.21</td> <td>33.87</td> <td>33.13</td> <td>89.76</td> <td>86.70</td> <td>41.90</td> <td>53.30</td> <td>32.44</td> <td>40.95</td> <td>42.55</td> <td>45.62</td> <td>77.41</td> <td>30.97</td> <td>55.16</td> <td>100.00</td> <td>38.79</td> <td>82.03</td> </tr> <tr> <td>Score</td> <td>0.50</td> <td>0.50</td> <td>1.00</td> <td>-0.47</td> <td>-0.49</td> <td>-0.40</td> <td>-0.39</td> <td>0.75</td> <td>1.50</td> <td>-0.34</td> <td>-0.33</td> <td>1.50</td> <td>1.50</td> <td>-0.42</td> <td>1.50</td> <td>0.75</td> <td>-0.41</td> <td>0.25</td> <td>1.50</td> <td>1.50</td> <td>0.50</td> <td>0.50</td> <td>1.50</td> <td>1.50</td> <td>-0.82</td> </tr> <tr> <td>Ion-type</td> <td>KQ</td> <td>a1</td> <td>F</td> <td></td> <td></td> <td></td> <td>Lk</td> <td>y3</td> <td></td> <td>y3</td> <td></td> <td>y9<sup>+2</sup></td> <td>y9<sup>+2</sup></td> <td></td> <td>y6</td> <td>GSVLKQ</td> <td>b8-H2O</td> <td>y13<sup>+2</sup></td> <td>y7</td> <td>y15-NH3<sup>+2</sup></td> <td>y8-H2O<sup>+2</sup></td> <td>y8</td> <td>y<sup>++16</sup></td> <td></td> </tr> <tr> <td>Delta ppm</td> <td>22.9</td> <td>-2.6</td> <td>0.50</td> <td>1.0</td> <td></td> <td></td> <td>21.0</td> <td>21.0</td> <td>-26.2</td> <td></td> <td></td> <td>5.7</td> <td>11.8</td> <td></td> <td>-24.7</td> <td>-5.5</td> <td>-0.41</td> <td>0.1</td> <td>-20.8</td> <td>-3.6</td> <td>0.2</td> <td>-24.9</td> <td>-3.1</td> <td>12.3</td> </tr> <tr> <td></td> <td>LI</td> <td></td> <td>QFLSET</td> <td>3.6</td> <td></td> <td></td> <td></td> <td></td> <td></td> <td></td> <td></td> <td></td> <td></td> </tr> </tbody> </table> |        |         |         |                  |                |                                                           |                                 |                            |                             |                    |         |                  |                       |                                                                                     | Fragment-ion (m/z) | 84.083  | 86.097                | 120.081           | 153.060               | 171.104               | 177.102               | 353.139 | 356.238           | 377.193 | 386.193                | 458.230 | 593.281 | 612.324 <sup>+2</sup> | 631.396 | 706.344 | 727.407 | 781.370 <sup>+2</sup> | 787.363 | 790.404 <sup>+2</sup> | 853.427 | 903.942 <sup>+2</sup> | 963.454 | 981.486 | 986.001 | 1015.007 <sup>+2</sup> | Frac. Inten.(% of TIC) | 0.26 | 4.08 | 0.31 | 3.83 | 4.03 | 3.28 | 3.21 | 2.77 | 5.52 | 2.78 | 2.72 | 7.38 | 7.13 | 3.44 | 4.38 | 2.67 | 3.37 | 3.50 | 3.75 | 6.36 | 2.55 | 4.53 | 8.22 | 3.19 | 6.74 | Rel. Inten.(% of BP) | 3.13 | 49.63 | 3.77 | 46.65 | 49.03 | 39.91 | 39.05 | 33.74 | 67.21 | 33.87 | 33.13 | 89.76 | 86.70 | 41.90 | 53.30 | 32.44 | 40.95 | 42.55 | 45.62 | 77.41 | 30.97 | 55.16 | 100.00 | 38.79 | 82.03 | Score | 0.50 | 0.50 | 1.00 | -0.47 | -0.49 | -0.40 | -0.39 | 0.75 | 1.50 | -0.34 | -0.33 | 1.50 | 1.50 | -0.42 | 1.50 | 0.75 | -0.41 | 0.25 | 1.50 | 1.50 | 0.50 | 0.50 | 1.50 | 1.50 | -0.82 | Ion-type | KQ | a1 | F |  |  |  | Lk | y3 |  | y3 |  | y9 <sup>+2</sup> | y9 <sup>+2</sup> |  | y6 | GSVLKQ | b8-H2O | y13 <sup>+2</sup> | y7 | y15-NH3 <sup>+2</sup> | y8-H2O <sup>+2</sup> | y8 | y <sup>++16</sup> |  | Delta ppm | 22.9 | -2.6 | 0.50 | 1.0 |  |  | 21.0 | 21.0 | -26.2 |  |  | 5.7 | 11.8 |  | -24.7 | -5.5 | -0.41 | 0.1 | -20.8 | -3.6 | 0.2 | -24.9 | -3.1 | 12.3 |  | LI |  |  |  |  |  |  |  |  |  |  |  |  |  | QFLSET | 3.6 |  |  |  |  |  |  |  |  |  |
| Fragment-ion (m/z)                                                                                                                                                                                                                                                                                                                                                                                                                                                                                                                                                                                                                                                                                                                                                                                                                                                                                                                                                                                                                                                                                                                                                                                                                                                                                                                                                                                                                                                                                                                                                                                                                                                                                                                                                                                                                                                                                                                                                                                                                                                                                                                                                                                                                                                                                                                                                                                                                                                                                                                                                                                                                                                                                                                                                                                                                                                                                                         | 84.083 | 86.097  | 120.081 | 153.060          | 171.104        | 177.102                                                   | 353.139                         | 356.238                    | 377.193                     | 386.193            | 458.230 | 593.281          | 612.324 <sup>+2</sup> | 631.396                                                                             | 706.344            | 727.407 | 781.370 <sup>+2</sup> | 787.363           | 790.404 <sup>+2</sup> | 853.427               | 903.942 <sup>+2</sup> | 963.454 | 981.486           | 986.001 | 1015.007 <sup>+2</sup> |         |         |                       |         |         |         |                       |         |                       |         |                       |         |         |         |                        |                        |      |      |      |      |      |      |      |      |      |      |      |      |      |      |      |      |      |      |      |      |      |      |      |      |      |                      |      |       |      |       |       |       |       |       |       |       |       |       |       |       |       |       |       |       |       |       |       |       |        |       |       |       |      |      |      |       |       |       |       |      |      |       |       |      |      |       |      |      |       |      |      |      |      |      |      |      |       |          |    |    |   |  |  |  |    |    |  |    |  |                  |                  |  |    |        |        |                   |    |                       |                      |    |                   |  |           |      |      |      |     |  |  |      |      |       |  |  |     |      |  |       |      |       |     |       |      |     |       |      |      |  |    |  |  |  |  |  |  |  |  |  |  |  |  |  |        |     |  |  |  |  |  |  |  |  |  |
| Frac. Inten.(% of TIC)                                                                                                                                                                                                                                                                                                                                                                                                                                                                                                                                                                                                                                                                                                                                                                                                                                                                                                                                                                                                                                                                                                                                                                                                                                                                                                                                                                                                                                                                                                                                                                                                                                                                                                                                                                                                                                                                                                                                                                                                                                                                                                                                                                                                                                                                                                                                                                                                                                                                                                                                                                                                                                                                                                                                                                                                                                                                                                     | 0.26   | 4.08    | 0.31    | 3.83             | 4.03           | 3.28                                                      | 3.21                            | 2.77                       | 5.52                        | 2.78               | 2.72    | 7.38             | 7.13                  | 3.44                                                                                | 4.38               | 2.67    | 3.37                  | 3.50              | 3.75                  | 6.36                  | 2.55                  | 4.53    | 8.22              | 3.19    | 6.74                   |         |         |                       |         |         |         |                       |         |                       |         |                       |         |         |         |                        |                        |      |      |      |      |      |      |      |      |      |      |      |      |      |      |      |      |      |      |      |      |      |      |      |      |      |                      |      |       |      |       |       |       |       |       |       |       |       |       |       |       |       |       |       |       |       |       |       |       |        |       |       |       |      |      |      |       |       |       |       |      |      |       |       |      |      |       |      |      |       |      |      |      |      |      |      |      |       |          |    |    |   |  |  |  |    |    |  |    |  |                  |                  |  |    |        |        |                   |    |                       |                      |    |                   |  |           |      |      |      |     |  |  |      |      |       |  |  |     |      |  |       |      |       |     |       |      |     |       |      |      |  |    |  |  |  |  |  |  |  |  |  |  |  |  |  |        |     |  |  |  |  |  |  |  |  |  |
| Rel. Inten.(% of BP)                                                                                                                                                                                                                                                                                                                                                                                                                                                                                                                                                                                                                                                                                                                                                                                                                                                                                                                                                                                                                                                                                                                                                                                                                                                                                                                                                                                                                                                                                                                                                                                                                                                                                                                                                                                                                                                                                                                                                                                                                                                                                                                                                                                                                                                                                                                                                                                                                                                                                                                                                                                                                                                                                                                                                                                                                                                                                                       | 3.13   | 49.63   | 3.77    | 46.65            | 49.03          | 39.91                                                     | 39.05                           | 33.74                      | 67.21                       | 33.87              | 33.13   | 89.76            | 86.70                 | 41.90                                                                               | 53.30              | 32.44   | 40.95                 | 42.55             | 45.62                 | 77.41                 | 30.97                 | 55.16   | 100.00            | 38.79   | 82.03                  |         |         |                       |         |         |         |                       |         |                       |         |                       |         |         |         |                        |                        |      |      |      |      |      |      |      |      |      |      |      |      |      |      |      |      |      |      |      |      |      |      |      |      |      |                      |      |       |      |       |       |       |       |       |       |       |       |       |       |       |       |       |       |       |       |       |       |       |        |       |       |       |      |      |      |       |       |       |       |      |      |       |       |      |      |       |      |      |       |      |      |      |      |      |      |      |       |          |    |    |   |  |  |  |    |    |  |    |  |                  |                  |  |    |        |        |                   |    |                       |                      |    |                   |  |           |      |      |      |     |  |  |      |      |       |  |  |     |      |  |       |      |       |     |       |      |     |       |      |      |  |    |  |  |  |  |  |  |  |  |  |  |  |  |  |        |     |  |  |  |  |  |  |  |  |  |
| Score                                                                                                                                                                                                                                                                                                                                                                                                                                                                                                                                                                                                                                                                                                                                                                                                                                                                                                                                                                                                                                                                                                                                                                                                                                                                                                                                                                                                                                                                                                                                                                                                                                                                                                                                                                                                                                                                                                                                                                                                                                                                                                                                                                                                                                                                                                                                                                                                                                                                                                                                                                                                                                                                                                                                                                                                                                                                                                                      | 0.50   | 0.50    | 1.00    | -0.47            | -0.49          | -0.40                                                     | -0.39                           | 0.75                       | 1.50                        | -0.34              | -0.33   | 1.50             | 1.50                  | -0.42                                                                               | 1.50               | 0.75    | -0.41                 | 0.25              | 1.50                  | 1.50                  | 0.50                  | 0.50    | 1.50              | 1.50    | -0.82                  |         |         |                       |         |         |         |                       |         |                       |         |                       |         |         |         |                        |                        |      |      |      |      |      |      |      |      |      |      |      |      |      |      |      |      |      |      |      |      |      |      |      |      |      |                      |      |       |      |       |       |       |       |       |       |       |       |       |       |       |       |       |       |       |       |       |       |       |        |       |       |       |      |      |      |       |       |       |       |      |      |       |       |      |      |       |      |      |       |      |      |      |      |      |      |      |       |          |    |    |   |  |  |  |    |    |  |    |  |                  |                  |  |    |        |        |                   |    |                       |                      |    |                   |  |           |      |      |      |     |  |  |      |      |       |  |  |     |      |  |       |      |       |     |       |      |     |       |      |      |  |    |  |  |  |  |  |  |  |  |  |  |  |  |  |        |     |  |  |  |  |  |  |  |  |  |
| Ion-type                                                                                                                                                                                                                                                                                                                                                                                                                                                                                                                                                                                                                                                                                                                                                                                                                                                                                                                                                                                                                                                                                                                                                                                                                                                                                                                                                                                                                                                                                                                                                                                                                                                                                                                                                                                                                                                                                                                                                                                                                                                                                                                                                                                                                                                                                                                                                                                                                                                                                                                                                                                                                                                                                                                                                                                                                                                                                                                   | KQ     | a1      | F       |                  |                |                                                           | Lk                              | y3                         |                             | y3                 |         | y9 <sup>+2</sup> | y9 <sup>+2</sup>      |                                                                                     | y6                 | GSVLKQ  | b8-H2O                | y13 <sup>+2</sup> | y7                    | y15-NH3 <sup>+2</sup> | y8-H2O <sup>+2</sup>  | y8      | y <sup>++16</sup> |         |                        |         |         |                       |         |         |         |                       |         |                       |         |                       |         |         |         |                        |                        |      |      |      |      |      |      |      |      |      |      |      |      |      |      |      |      |      |      |      |      |      |      |      |      |      |                      |      |       |      |       |       |       |       |       |       |       |       |       |       |       |       |       |       |       |       |       |       |       |        |       |       |       |      |      |      |       |       |       |       |      |      |       |       |      |      |       |      |      |       |      |      |      |      |      |      |      |       |          |    |    |   |  |  |  |    |    |  |    |  |                  |                  |  |    |        |        |                   |    |                       |                      |    |                   |  |           |      |      |      |     |  |  |      |      |       |  |  |     |      |  |       |      |       |     |       |      |     |       |      |      |  |    |  |  |  |  |  |  |  |  |  |  |  |  |  |        |     |  |  |  |  |  |  |  |  |  |
| Delta ppm                                                                                                                                                                                                                                                                                                                                                                                                                                                                                                                                                                                                                                                                                                                                                                                                                                                                                                                                                                                                                                                                                                                                                                                                                                                                                                                                                                                                                                                                                                                                                                                                                                                                                                                                                                                                                                                                                                                                                                                                                                                                                                                                                                                                                                                                                                                                                                                                                                                                                                                                                                                                                                                                                                                                                                                                                                                                                                                  | 22.9   | -2.6    | 0.50    | 1.0              |                |                                                           | 21.0                            | 21.0                       | -26.2                       |                    |         | 5.7              | 11.8                  |                                                                                     | -24.7              | -5.5    | -0.41                 | 0.1               | -20.8                 | -3.6                  | 0.2                   | -24.9   | -3.1              | 12.3    |                        |         |         |                       |         |         |         |                       |         |                       |         |                       |         |         |         |                        |                        |      |      |      |      |      |      |      |      |      |      |      |      |      |      |      |      |      |      |      |      |      |      |      |      |      |                      |      |       |      |       |       |       |       |       |       |       |       |       |       |       |       |       |       |       |       |       |       |       |        |       |       |       |      |      |      |       |       |       |       |      |      |       |       |      |      |       |      |      |       |      |      |      |      |      |      |      |       |          |    |    |   |  |  |  |    |    |  |    |  |                  |                  |  |    |        |        |                   |    |                       |                      |    |                   |  |           |      |      |      |     |  |  |      |      |       |  |  |     |      |  |       |      |       |     |       |      |     |       |      |      |  |    |  |  |  |  |  |  |  |  |  |  |  |  |  |        |     |  |  |  |  |  |  |  |  |  |
|                                                                                                                                                                                                                                                                                                                                                                                                                                                                                                                                                                                                                                                                                                                                                                                                                                                                                                                                                                                                                                                                                                                                                                                                                                                                                                                                                                                                                                                                                                                                                                                                                                                                                                                                                                                                                                                                                                                                                                                                                                                                                                                                                                                                                                                                                                                                                                                                                                                                                                                                                                                                                                                                                                                                                                                                                                                                                                                            | LI     |         |         |                  |                |                                                           |                                 |                            |                             |                    |         |                  |                       |                                                                                     | QFLSET             | 3.6     |                       |                   |                       |                       |                       |         |                   |         |                        |         |         |                       |         |         |         |                       |         |                       |         |                       |         |         |         |                        |                        |      |      |      |      |      |      |      |      |      |      |      |      |      |      |      |      |      |      |      |      |      |      |      |      |      |                      |      |       |      |       |       |       |       |       |       |       |       |       |       |       |       |       |       |       |       |       |       |       |        |       |       |       |      |      |      |       |       |       |       |      |      |       |       |      |      |       |      |      |       |      |      |      |      |      |      |      |       |          |    |    |   |  |  |  |    |    |  |    |  |                  |                  |  |    |        |        |                   |    |                       |                      |    |                   |  |           |      |      |      |     |  |  |      |      |       |  |  |     |      |  |       |      |       |     |       |      |     |       |      |      |  |    |  |  |  |  |  |  |  |  |  |  |  |  |  |        |     |  |  |  |  |  |  |  |  |  |

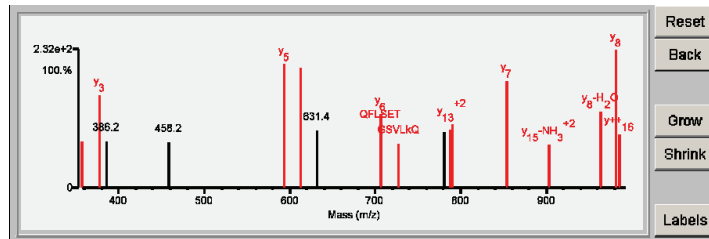

Result Summary

| Rank | Score | SPI (%) | BCS | # Unmatched Ions | Variable sites | Sequence                         | MH <sup>+</sup> Calculated (Da) | MH <sup>+</sup> Error (Da) | MH <sup>+</sup> Error (ppm) | Protein MW/pI (Da) | Species | Accession # | Protein Name                                                                        |
|------|-------|---------|-----|------------------|----------------|----------------------------------|---------------------------------|----------------------------|-----------------------------|--------------------|---------|-------------|-------------------------------------------------------------------------------------|
| 1    | 15.84 | 88.5    | 13  | 4/25             | K210k          | (R)KPFPPINHGETSDETLLEDAIEVCKK(F) | 2870.4241                       | 114.0553                   | 4.2                         | 26182.714.84       | HUMAN   | P15374      | Ubiquitin carboxyl-terminal hydrolase isozyme L3 OS=Homo sapiens GN=UCHL3 PE=1 SV=1 |
| 1    | 15.84 | 88.5    | 13  | 4/25             | K211k          | (R)KPFPPINHGETSDETLLEDAIEVCKK(F) | 2870.4241                       | 114.0553                   | 4.2                         | 26182.714.84       | HUMAN   | P15374      | Ubiquitin carboxyl-terminal hydrolase isozyme L3 OS=Homo sapiens GN=UCHL3 PE=1 SV=1 |

Detailed Results

| Rank | Score | SPI (%) | BCS | # Unmatched Ions | Variable sites | Sequence                               | MH <sup>+</sup> Calculated (Da) | MH <sup>+</sup> Error (Da) | MH <sup>+</sup> Error (ppm) | Protein MW/pI (Da) | Species | Accession # | MS-Digest Index # | Protein Name                                                                        |
|------|-------|---------|-----|------------------|----------------|----------------------------------------|---------------------------------|----------------------------|-----------------------------|--------------------|---------|-------------|-------------------|-------------------------------------------------------------------------------------|
| 1    | 15.84 | 88.5    | 13  | 4/25             | K210k          | (R)KLPFPPIHNGEYTSDEYVLLLEEDAIIEVCKK(F) | 2870.4241                       | 114.0553                   | 4.2                         | 26182.714.84       | HUMAN   | P15374      | 815725            | Ubiquitin carboxyl-terminal hydrolase isozyme L3 OS=Homo sapiens GN=UCHL3 PE=1 SV=1 |

  

| Fragment-ion (m/z)      | 72.081 | 84.080 | 86.095 | 102.053 | 129.101 | 215.137 | 291.194 | 358.157 | 389.244 | 445.744 <sup>+2</sup>            | 549.274 | 611.365 | 648.344 | 662.320 <sup>+2</sup>            | 726.836 <sup>+2</sup>            | 759.366 <sup>+2</sup>            | 768.354 <sup>+2</sup>            | 777.380            | 777.863                          | 824.910 <sup>+2</sup>            | 833.904 <sup>+2</sup>            | 890.461 <sup>+2</sup>            | 1012.484 <sup>+2</sup>           | 1048.006 <sup>+2</sup>           | 1076.518 |
|-------------------------|--------|--------|--------|---------|---------|---------|---------|---------|---------|----------------------------------|---------|---------|---------|----------------------------------|----------------------------------|----------------------------------|----------------------------------|--------------------|----------------------------------|----------------------------------|----------------------------------|----------------------------------|----------------------------------|----------------------------------|----------|
| Frac. Inten. (% of TIC) | 0.07   | 0.15   | 0.59   | 0.13    | 2.20    | 2.31    | 2.38    | 2.35    | 2.23    | 2.33                             | 2.70    | 2.63    | 5.38    | 3.69                             | 3.14                             | 2.51                             | 7.39                             | 12.74              | 3.93                             | 7.49                             | 13.05                            | 7.43                             | 3.56                             | 7.49                             | 2.12     |
| Rel. Inten. (% of BP)   | 0.55   | 1.16   | 4.56   | 0.98    | 16.86   | 17.67   | 18.23   | 18.01   | 17.12   | 17.83                            | 20.65   | 20.17   | 41.24   | 28.30                            | 24.06                            | 19.25                            | 56.61                            | 97.59              | 30.15                            | 57.36                            | 100.00                           | 56.95                            | 27.30                            | 57.42                            | 16.24    |
| Score                   | 0.50   | 0.50   | 0.22   | 1.00    | 0.50    | 0.75    | 0.75    | 0.75    | 1.50    | 1.50                             | 1.50    | -0.20   | 1.50    | 0.50                             | 0.50                             | -0.19                            | 0.25                             | 1.50               | -0.30                            | 0.25                             | 0.50                             | 0.50                             | 0.50                             | 0.50                             | 1.50     |
| Ion-type                | V      | KQ     | LI     | E       | b1      | TL      | TL      | LED     | y2      | b <sup>++</sup> 16 <sup>+2</sup> | y3      | y4      | y4      | b <sup>++</sup> 12 <sup>+2</sup> | b <sup>++</sup> 13 <sup>+2</sup> | b <sup>++</sup> 14 <sup>+2</sup> | b <sup>++</sup> 14 <sup>+2</sup> | b <sup>++</sup> 14 | b <sup>++</sup> 15 <sup>+2</sup> | b <sup>++</sup> 15 <sup>+2</sup> | b <sup>++</sup> 15 <sup>+2</sup> | b <sup>++</sup> 16 <sup>+2</sup> | b <sup>++</sup> 18 <sup>+2</sup> | b <sup>++</sup> 19 <sup>+2</sup> | y8       |
| Delta ppm               | -1.0   | -8.0   | -14.2  | -16.2   | -21.2   | -13.6   | -14.2   | -18.0   | -18.0   | 35.6                             | -13.9   | -9.0    | -9.0    | -1.3                             | -7.5                             | -8.3                             | -8.3                             | 18.2               | 9.7                              | -4.1                             | 12.2                             | -0.6                             | 2.6                              | -21.0                            |          |

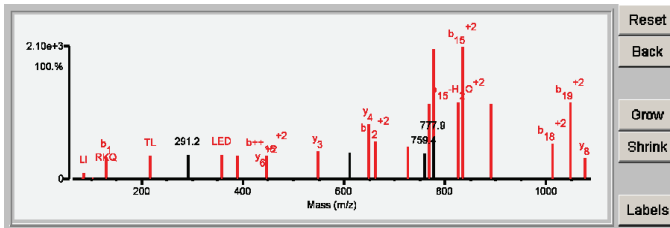

Result Summary

| Rank | Score | SPI (%) | BCS | # Unmatched Ions | Variable sites | Sequence                  | MH <sup>+</sup> Calculated (Da) | MH <sup>+</sup> Error (Da) | MH <sup>+</sup> Error (ppm) | Protein MW/pI (Da) | Species | Accession # | Protein Name                                                                 |
|------|-------|---------|-----|------------------|----------------|---------------------------|---------------------------------|----------------------------|-----------------------------|--------------------|---------|-------------|------------------------------------------------------------------------------|
| 1    | 16.90 | 85.1    | 8   | 5/25             | K529k          | (K)DTVLGK <b>WQYF</b> (-) | 1256.6310                       | 114.0525                   | 7.0                         | 57295.2/9.46       | HUMAN   | O14562      | Ubiquitin domain-containing protein UBFD1 OS=Homo sapiens GN=UBFD1 PE=1 SV=1 |

Detailed Results

| Rank | Score | SPI (%) | BCS | # Unmatched Ions | Variable sites | Sequence                          | MH <sup>+</sup> Calculated (Da) | MH <sup>+</sup> Error (Da) | MH <sup>+</sup> Error (ppm) | Protein MW/pI (Da) | Species | Accession # | MS-Digest Index # | Protein Name                                                                 |
|------|-------|---------|-----|------------------|----------------|-----------------------------------|---------------------------------|----------------------------|-----------------------------|--------------------|---------|-------------|-------------------|------------------------------------------------------------------------------|
| 1    | 16.90 | 85.1    | 8   | 5/25             | K529k          | (K)D T V L G K <b>W Q Y F</b> (-) | 1256.6310                       | 114.0525                   | 7.0                         | 57295.2/9.46       | HUMAN   | O14562      | 812689            | Ubiquitin domain-containing protein UBFD1 OS=Homo sapiens GN=UBFD1 PE=1 SV=1 |

  

| Fragment-ion (m/z)     | 72.080 | 120.080 | 136.074 | 166.082 | 185.165                          | 199.075        | 217.082                          | 270.146                          | 298.140 | 315.147 | 329.149 | 429.234        | 457.207 | 486.255        | 557.288 | 599.340 | 603.295 <sup>+2</sup>        | 643.290 | 661.326 | 727.388 | 777.366 | 873.477 | 942.446        | 1042.508 | 1055.531 |
|------------------------|--------|---------|---------|---------|----------------------------------|----------------|----------------------------------|----------------------------------|---------|---------|---------|----------------|---------|----------------|---------|---------|------------------------------|---------|---------|---------|---------|---------|----------------|----------|----------|
| Frac. Inten.(% of TIC) | 0.12   | 0.09    | 0.30    | 3.87    | 2.17                             | 3.71           | 2.19                             | 3.84                             | 13.53   | 7.87    | 9.76    | 4.61           | 3.38    | 2.17           | 2.27    | 2.83    | 2.52                         | 3.35    | 2.94    | 5.48    | 3.55    | 2.45    | 7.17           | 4.01     | 5.81     |
| Rel. Inten.(% of BP)   | 0.87   | 0.69    | 2.25    | 28.58   | 16.03                            | 27.42          | 16.19                            | 28.36                            | 100.00  | 58.19   | 72.17   | 34.10          | 24.99   | 16.05          | 16.76   | 20.95   | 18.63                        | 24.76   | 21.69   | 40.49   | 26.25   | 18.11   | 53.02          | 29.65    | 42.93    |
| Score                  | 0.50   | 1.00    | 1.00    | 1.50    | -0.16                            | 0.25           | 0.50                             | -0.28                            | 0.25    | 0.75    | 1.50    | 0.75           | 1.50    | 0.75           | 0.75    | 0.50    | 1.50                         | 1.50    | -0.22   | 0.75    | -0.26   | -0.18   | 1.50           | 0.50     | 1.50     |
| Ion-type               | V      | F       | Y       | Y1      | b <sub>2</sub> -H <sub>2</sub> O | b <sub>2</sub> | b <sub>2</sub> -H <sub>2</sub> O | b <sub>3</sub> -H <sub>2</sub> O | WQ      | WQ      | Y2      | b <sub>4</sub> | Y3      | b <sub>5</sub> | KWQ     | LGKW    | b <sub>9</sub> <sup>+2</sup> | Y4      | Y4      | LGKWQ   | Y4      | Y6      | b <sub>8</sub> | Y6       | Y7       |
| Delta ppm              | -10.8  | -3.1    | -15.4   | -23.8   |                                  | 18.4           | 0.5                              |                                  | 0.5     | 6.5     | -3.3    | -1.8           | -1.4    | -1.5           | 8.2     | 16.0    | -9.5                         | 4.7     |         | -0.9    |         | -0.7    | -22.3          | -0.2     |          |

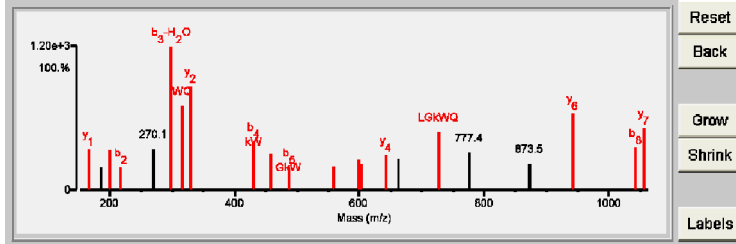

Result Summary

| Rank | Score | SPI (%) | BCS | # Unmatched Ions | Variable sites | Sequence                 | MH <sup>+</sup> Calculated (Da) | MH <sup>+</sup> Error (Da) | MH <sup>+</sup> Error (ppm) | Protein MW/pi (Da) | Species | Accession # | Protein Name                                                    |
|------|-------|---------|-----|------------------|----------------|--------------------------|---------------------------------|----------------------------|-----------------------------|--------------------|---------|-------------|-----------------------------------------------------------------|
| 1    | 18.93 | 83.2    | 8   | 5/25             | K109k          | (R)AFGFSHLEALDDSkELQR(F) | 2176.1033                       | 114.0681                   | 11.0                        | 31284.2/4.85       | HUMAN   | Q96FW1      | Ubiquitin thioesterase OTUB1 OS=Homo sapiens GN=OTUB1 PE=1 SV=2 |

Detailed Results

| Rank                    | Score  | SPI (%) | BCS    | # Unmatched Ions | Variable sites | Sequence                                               | MH <sup>+</sup> Calculated (Da) | MH <sup>+</sup> Error (Da) | MH <sup>+</sup> Error (ppm) | Protein MW/pi (Da) | Species | Accession # | MS-Digest Index # | Protein Name                                                    |         |                       |         |         |                       |                       |         |         |         |         |          |  |
|-------------------------|--------|---------|--------|------------------|----------------|--------------------------------------------------------|---------------------------------|----------------------------|-----------------------------|--------------------|---------|-------------|-------------------|-----------------------------------------------------------------|---------|-----------------------|---------|---------|-----------------------|-----------------------|---------|---------|---------|---------|----------|--|
| 1                       | 18.93  | 83.2    | 8      | 5/25             | K109k          | (R)A F G F S H L E A L L / D / S k / E / L / Q / R (F) | 2176.1033                       | 114.0681                   | 11.0                        | 31284.2/4.85       | HUMAN   | Q96FW1      | 474231            | Ubiquitin thioesterase OTUB1 OS=Homo sapiens GN=OTUB1 PE=1 SV=2 |         |                       |         |         |                       |                       |         |         |         |         |          |  |
| Fragment-ion (m/z)      | 70.066 | 84.080  | 86.096 | 110.072          | 120.081        | 121.083                                                | 129.102                         | 175.119                    | 177.102                     | 191.117            | 219.113 | 225.101     | 303.180           | 314.171                                                         | 416.263 | 437.740 <sup>+2</sup> | 513.258 | 545.310 | 653.343 <sup>+3</sup> | 691.361 <sup>+3</sup> | 742.348 | 855.438 | 874.480 | 989.517 | 1104.532 |  |
| Frac. Inten. (% of TIC) | 0.00   | 0.30    | 0.64   | 0.17             | 1.35           | 3.20                                                   | 0.07                            | 6.56                       | 2.56                        | 17.83              | 3.32    | 2.41        | 4.74              | 2.41                                                            | 5.20    | 4.25                  | 2.86    | 9.65    | 4.05                  | 9.78                  | 4.40    | 4.10    | 2.85    | 3.30    | 3.99     |  |
| Rel. Inten. (% of BP)   | 0.01   | 1.71    | 3.58   | 0.93             | 7.58           | 17.94                                                  | 0.40                            | 36.76                      | 14.33                       | 100.00             | 18.64   | 13.52       | 26.59             | 13.52                                                           | 29.17   | 23.85                 | 16.02   | 54.13   | 22.72                 | 54.82                 | 24.68   | 22.97   | 15.97   | 18.51   | 22.40    |  |
| Score                   | 0.20   | 0.50    | 0.22   | 1.00             | 1.00           | -0.18                                                  | 0.20                            | 1.50                       | -0.14                       | 0.50               | 0.50    | 0.75        | 1.50              | 0.75                                                            | 1.50    | 1.50                  | -0.16   | 1.50    | -0.23                 | 1.50                  | 0.75    | -0.23   | 1.50    | 1.50    | 1.50     |  |
| Ion-type                | PR     | KQ      | LI     | H                | F              | RKQ                                                    |                                 | y1                         |                             | a2                 | b2      | SH          | y2                | EAL                                                             | y3      | y6 <sup>+2</sup>      |         | y4      |                       | y17 <sup>+3</sup>     | b7-H2O  |         | y6      | y7      | y8       |  |
| Delta ppm               | 5.3    | -8.0    | -0.3   | 5.7              | -2.3           |                                                        | -3.4                            | -0.9                       |                             | -8.8               | -3.2    | 7.0         | 8.8               | -3.3                                                            | 3.4     | -0.9                  |         | 10.3    |                       | 13.7                  | -26.6   |         | 6.9     | 15.7    | 3.5      |  |
|                         |        |         |        |                  |                |                                                        |                                 |                            |                             |                    |         |             |                   |                                                                 |         |                       |         |         |                       |                       | GFSHLEA |         |         |         |          |  |
|                         |        |         |        |                  |                |                                                        |                                 |                            |                             |                    |         |             |                   |                                                                 |         |                       |         |         |                       |                       | -6.0    |         |         |         |          |  |

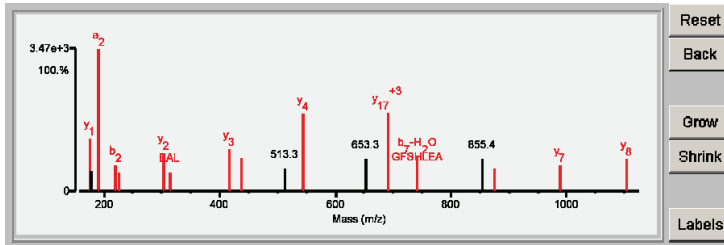

Result Summary

| Rank | Score | SPI (%) | BCS | # Unmatched Ions | Variable sites | Sequence            | MH <sup>+</sup> Calculated (Da) | MH <sup>+</sup> Error (Da) | MH <sup>+</sup> Error (ppm) | Protein MW/pi (Da) | Species | Accession #            | Protein Name                                                                        |
|------|-------|---------|-----|------------------|----------------|---------------------|---------------------------------|----------------------------|-----------------------------|--------------------|---------|------------------------|-------------------------------------------------------------------------------------|
| 1    | 11.77 | 76.9    | 6   | 8/24             | K178k          | (K)LLALNPDAVELFK(A) | 1570.9203                       | 114.0566                   | 8.1                         | 45338.7/4.82       | HUMAN   | <a href="#">Q9BSL1</a> | Ubiquitin-associated domain-containing protein 1 OS=Homo sapiens GN=UBAC1 PE=1 SV=1 |
| 1    | 11.77 | 76.9    | 6   | 8/24             | K179k          | (K)LLALNPDAVELFK(A) | 1570.9203                       | 114.0566                   | 8.1                         | 45338.7/4.82       | HUMAN   | <a href="#">Q9BSL1</a> | Ubiquitin-associated domain-containing protein 1 OS=Homo sapiens GN=UBAC1 PE=1 SV=1 |

Detailed Results

| Rank | Score | SPI (%) | BCS | # Unmatched Ions | Variable sites | Sequence                                 | MH <sup>+</sup> Calculated (Da) | MH <sup>+</sup> Error (Da) | MH <sup>+</sup> Error (ppm) | Protein MW/pi (Da) | Species | Accession #            | MS-Digest Index #      | Protein Name                                                                        |
|------|-------|---------|-----|------------------|----------------|------------------------------------------|---------------------------------|----------------------------|-----------------------------|--------------------|---------|------------------------|------------------------|-------------------------------------------------------------------------------------|
| 1    | 11.77 | 76.9    | 6   | 8/24             | K178k          | (K) L L \A L N P D A V / E / L F / K (A) | 1570.9203                       | 114.0566                   | 8.1                         | 45338.7/4.82       | HUMAN   | <a href="#">Q9BSL1</a> | <a href="#">812199</a> | Ubiquitin-associated domain-containing protein 1 OS=Homo sapiens GN=UBAC1 PE=1 SV=1 |

  

| Fragment-ion (m/z)      | 70.063 | 72.080 | 84.081 | 86.096 | 87.055 | 157.133 | 173.131 | 199.177 | 213.089 | 227.176 | 228.129 | 229.111 | 341.215 | 346.681*2 | 389.257 | 525.332 | 528.267 | 588.327 | 606.638 | 649.415 | 668.847 | 778.429 | 786.467*2 | 838.509*2 |
|-------------------------|--------|--------|--------|--------|--------|---------|---------|---------|---------|---------|---------|---------|---------|-----------|---------|---------|---------|---------|---------|---------|---------|---------|-----------|-----------|
| Frac. Inten. (% of TIC) | 0.00   | 0.19   | 0.25   | 30.23  | 0.07   | 3.66    | 2.99    | 10.56   | 3.37    | 5.43    | 2.86    | 2.74    | 3.02    | 2.66      | 3.68    | 3.26    | 2.68    | 2.49    | 2.50    | 5.33    | 3.16    | 3.38    | 2.86      | 2.63      |
| Rel. Inten. (% of BP)   | 0.01   | 0.62   | 0.81   | 100.00 | 0.24   | 12.11   | 9.91    | 34.94   | 11.16   | 17.95   | 9.45    | 9.05    | 9.99    | 8.79      | 12.19   | 10.77   | 8.88    | 8.24    | 8.26    | 17.64   | 10.46   | 11.19   | 9.47      | 8.69      |
| Score                   | 0.20   | 0.50   | 0.50   | 0.50   | 0.33   | -0.12   | -0.10   | 0.50    | 0.75    | 0.50    | 0.75    | 0.75    | -0.10   | -0.09     | 1.50    | 0.50    | 0.75    | -0.08   | -0.08   | 1.50    | -0.10   | 1.50    | 1.50      | -0.09     |
| Ion-type                | PR     | V      | KQ     | a1     | NR     |         |         | a2      | PD      | b2      | b2      | LN      | VE      |           | Y2      | b5      | DAVEL   |         |         | Y4      |         | Y5      | Y13       | Y13+2     |
| Delta ppm               | -31.8  | -6.6   | 6.2    | -17.7  | -1.0   |         |         | -21.0   | 6.2     | -1.3    | -27.0   | -38.3   |         |           | 16.7    | -17.1   | -1.1    |         |         | 17.6    |         | -21.8   | 30.1      |           |

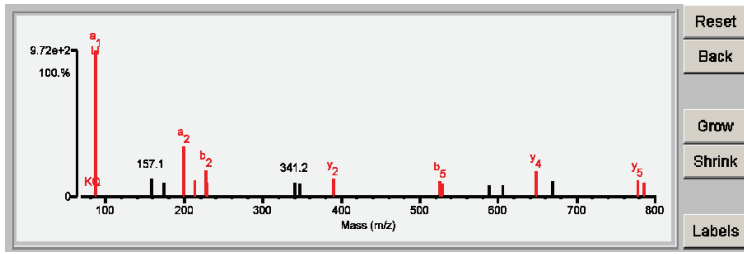

Result Summary

| Rank | Score | SPI (%) | BCS | # Unmatched Ions | Variable sites | Sequence                                      | MH <sup>+</sup> Calculated (Da) | MH <sup>+</sup> Error (Da) | MH <sup>+</sup> Error (ppm) | Protein MW/pI (Da) | Species | Accession #             | Protein Name                                                              |
|------|-------|---------|-----|------------------|----------------|-----------------------------------------------|---------------------------------|----------------------------|-----------------------------|--------------------|---------|-------------------------|---------------------------------------------------------------------------|
| 1    | 19.21 | 85.8    | 8   | 5/25             | K119k          | (K)FLTPCYHPNVDTQGNICLDILKEK(W)                | 2875.4117                       | 114.0597                   | 5.6                         | 19652.4/6.83       | HUMAN   | <a href="#">Q00762</a>  | Ubiquitin-conjugating enzyme E2 C OS=Homo sapiens GN=UBE2C PE=1 SV=1      |
| 2    | 18.54 | 83.4    | 8   | 6/25             | K121k          | (K)FLTPCYHPNVDTQGNICLDILKEK(W)                | 2875.4117                       | 114.0597                   | 5.6                         | 19652.4/6.83       | HUMAN   | <a href="#">Q00762</a>  | Ubiquitin-conjugating enzyme E2 C OS=Homo sapiens GN=UBE2C PE=1 SV=1      |
| 3    | 8.53  | 51.2    | 5   | 13/25            | M803m          | (R)SCNLRRAK <sup>m</sup> FTTWTDELLFRGGIDNK(C) | 2973.4710                       | 16.0004                    | 1.8                         | 120616.1/7.07      | HUMAN   | <a href="#">RQ13591</a> | REVERSE Semaphorin-5A OS=Homo sapiens GN=SEMA5A PE=1 SV=3                 |
| 4    | 7.27  | 58.3    | 2   | 11/25            | K321k K324k    | (K)GTRFALKELFDEANEWS <sup>d</sup> IKYTK(S)    | 2761.3832                       | 228.0882                   | 0.8                         | 83655.3/9.27       | HUMAN   | <a href="#">RQ13823</a> | REVERSE Nucleolar GTP-binding protein 2 OS=Homo sapiens GN=GNL2 PE=1 SV=1 |
| 5    | 5.29  | 51.3    | 1   | 12/25            | K411k K431k    | (K)TYKIDSWENAEDFLEKLA <sup>r</sup> FRTGk(L)   | 2761.3832                       | 228.0882                   | 0.8                         | 83655.3/9.27       | HUMAN   | <a href="#">Q13823</a>  | Nucleolar GTP-binding protein 2 OS=Homo sapiens GN=GNL2 PE=1 SV=1         |

Detailed Results

| Rank                                                                                                                                                                                                                                                                                                                                                                                                                                                                                                                                                                                                                                                                                                                                                                                                                                                                                                                                                                                                                                                                                                                                                                                                                                                                                                                                                                                                                                                                                                                                                                                                                                                                                                                                                                                                                                                                                                                                                                                                                                                                                                                                                                                                                                                                                                                                                                                                                                                                                                                                                                                                                                                                                                                                                                                                                                                              | Score  | SPI (%)          | BCS    | # Unmatched Ions | Variable sites | Sequence                                                           | MH <sup>+</sup> Calculated (Da) | MH <sup>+</sup> Error (Da) | MH <sup>+</sup> Error (ppm) | Protein MW/pI (Da) | Species | Accession #            | MS-Digest Index #            | Protein Name                                                         |                              |                |                |                       |                       |                                                 |                               |                               |                       |                |          |         |         |         |                       |         |         |         |                       |                       |         |                       |                       |                       |         |          |                         |      |      |      |      |      |      |       |      |      |      |      |      |      |      |      |      |      |      |      |      |      |      |      |      |      |                       |      |       |      |      |      |      |        |       |       |       |       |       |       |       |       |       |       |       |       |       |       |       |       |       |       |       |      |      |      |      |      |      |      |       |      |      |      |      |      |      |       |       |      |       |       |      |      |      |      |      |      |          |    |                  |    |    |   |                |                |                |    |                |     |                |                              |                              |                              |                |                |                |                |                                                 |                               |                               |                |                |           |      |       |      |      |      |       |      |       |      |     |     |     |     |  |  |  |  |  |  |     |      |     |      |     |     |
|-------------------------------------------------------------------------------------------------------------------------------------------------------------------------------------------------------------------------------------------------------------------------------------------------------------------------------------------------------------------------------------------------------------------------------------------------------------------------------------------------------------------------------------------------------------------------------------------------------------------------------------------------------------------------------------------------------------------------------------------------------------------------------------------------------------------------------------------------------------------------------------------------------------------------------------------------------------------------------------------------------------------------------------------------------------------------------------------------------------------------------------------------------------------------------------------------------------------------------------------------------------------------------------------------------------------------------------------------------------------------------------------------------------------------------------------------------------------------------------------------------------------------------------------------------------------------------------------------------------------------------------------------------------------------------------------------------------------------------------------------------------------------------------------------------------------------------------------------------------------------------------------------------------------------------------------------------------------------------------------------------------------------------------------------------------------------------------------------------------------------------------------------------------------------------------------------------------------------------------------------------------------------------------------------------------------------------------------------------------------------------------------------------------------------------------------------------------------------------------------------------------------------------------------------------------------------------------------------------------------------------------------------------------------------------------------------------------------------------------------------------------------------------------------------------------------------------------------------------------------|--------|------------------|--------|------------------|----------------|--------------------------------------------------------------------|---------------------------------|----------------------------|-----------------------------|--------------------|---------|------------------------|------------------------------|----------------------------------------------------------------------|------------------------------|----------------|----------------|-----------------------|-----------------------|-------------------------------------------------|-------------------------------|-------------------------------|-----------------------|----------------|----------|---------|---------|---------|-----------------------|---------|---------|---------|-----------------------|-----------------------|---------|-----------------------|-----------------------|-----------------------|---------|----------|-------------------------|------|------|------|------|------|------|-------|------|------|------|------|------|------|------|------|------|------|------|------|------|------|------|------|------|------|-----------------------|------|-------|------|------|------|------|--------|-------|-------|-------|-------|-------|-------|-------|-------|-------|-------|-------|-------|-------|-------|-------|-------|-------|-------|-------|------|------|------|------|------|------|------|-------|------|------|------|------|------|------|-------|-------|------|-------|-------|------|------|------|------|------|------|----------|----|------------------|----|----|---|----------------|----------------|----------------|----|----------------|-----|----------------|------------------------------|------------------------------|------------------------------|----------------|----------------|----------------|----------------|-------------------------------------------------|-------------------------------|-------------------------------|----------------|----------------|-----------|------|-------|------|------|------|-------|------|-------|------|-----|-----|-----|-----|--|--|--|--|--|--|-----|------|-----|------|-----|-----|
| 1                                                                                                                                                                                                                                                                                                                                                                                                                                                                                                                                                                                                                                                                                                                                                                                                                                                                                                                                                                                                                                                                                                                                                                                                                                                                                                                                                                                                                                                                                                                                                                                                                                                                                                                                                                                                                                                                                                                                                                                                                                                                                                                                                                                                                                                                                                                                                                                                                                                                                                                                                                                                                                                                                                                                                                                                                                                                 | 19.21  | 85.8             | 8      | 5/25             | K119k          | (K)F L I T P C Y H P N V D T Q G N I C / L / D I / L / k E / K (W) | 2875.4117                       | 114.0597                   | 5.6                         | 19652.4/6.83       | HUMAN   | <a href="#">Q00762</a> | <a href="#">812551</a>       | Ubiquitin-conjugating enzyme E2 C OS=Homo sapiens GN=UBE2C PE=1 SV=1 |                              |                |                |                       |                       |                                                 |                               |                               |                       |                |          |         |         |         |                       |         |         |         |                       |                       |         |                       |                       |                       |         |          |                         |      |      |      |      |      |      |       |      |      |      |      |      |      |      |      |      |      |      |      |      |      |      |      |      |      |                       |      |       |      |      |      |      |        |       |       |       |       |       |       |       |       |       |       |       |       |       |       |       |       |       |       |       |      |      |      |      |      |      |      |       |      |      |      |      |      |      |       |       |      |       |       |      |      |      |      |      |      |          |    |                  |    |    |   |                |                |                |    |                |     |                |                              |                              |                              |                |                |                |                |                                                 |                               |                               |                |                |           |      |       |      |      |      |       |      |       |      |     |     |     |     |  |  |  |  |  |  |     |      |     |      |     |     |
| <table border="1"> <thead> <tr> <th>Fragment-ion (m/z)</th> <th>70.065</th> <th>74.059</th> <th>84.080</th> <th>86.096</th> <th>110.071</th> <th>120.080</th> <th>233.165</th> <th>234.166</th> <th>261.158</th> <th>274.122</th> <th>362.209</th> <th>389.154</th> <th>518.296</th> <th>566.807<sup>+2</sup></th> <th>571.601</th> <th>576.264</th> <th>631.372</th> <th>692.289<sup>+2</sup></th> <th>799.348<sup>+2</sup></th> <th>859.490</th> <th>863.882<sup>+2</sup></th> <th>876.762<sup>+3</sup></th> <th>910.433<sup>+3</sup></th> <th>972.582</th> <th>1132.604</th> </tr> </thead> <tbody> <tr> <td>Frac. Inten. (% of TIC)</td> <td>0.00</td> <td>2.39</td> <td>0.07</td> <td>0.43</td> <td>0.07</td> <td>0.35</td> <td>14.71</td> <td>2.81</td> <td>9.02</td> <td>2.59</td> <td>4.13</td> <td>2.80</td> <td>6.30</td> <td>2.54</td> <td>2.53</td> <td>2.08</td> <td>5.28</td> <td>4.18</td> <td>2.59</td> <td>7.14</td> <td>3.45</td> <td>5.41</td> <td>6.42</td> <td>7.01</td> <td>5.70</td> </tr> <tr> <td>Rel. Inten. (% of BP)</td> <td>0.03</td> <td>16.25</td> <td>0.45</td> <td>2.92</td> <td>0.47</td> <td>2.35</td> <td>100.00</td> <td>19.13</td> <td>61.33</td> <td>17.58</td> <td>28.08</td> <td>19.06</td> <td>42.86</td> <td>17.28</td> <td>17.21</td> <td>14.13</td> <td>35.88</td> <td>28.45</td> <td>17.58</td> <td>48.55</td> <td>23.44</td> <td>36.77</td> <td>43.68</td> <td>47.63</td> <td>38.73</td> </tr> <tr> <td>Score</td> <td>0.20</td> <td>1.50</td> <td>0.50</td> <td>0.22</td> <td>1.00</td> <td>1.00</td> <td>0.50</td> <td>-0.19</td> <td>0.50</td> <td>0.75</td> <td>0.50</td> <td>0.75</td> <td>1.50</td> <td>1.50</td> <td>-0.17</td> <td>-0.14</td> <td>1.50</td> <td>-0.28</td> <td>-0.18</td> <td>1.50</td> <td>1.50</td> <td>1.50</td> <td>1.50</td> <td>1.50</td> <td>1.50</td> </tr> <tr> <td>Ion-type</td> <td>PR</td> <td>y<sup>++1</sup></td> <td>KQ</td> <td>LI</td> <td>H</td> <td>a<sub>1</sub></td> <td>b<sub>2</sub></td> <td>b<sub>2</sub></td> <td>CL</td> <td>b<sub>3</sub></td> <td>CLD</td> <td>y<sub>3</sub></td> <td>y<sub>6</sub><sup>+2</sup></td> <td>y<sub>6</sub><sup>+2</sup></td> <td>y<sub>6</sub><sup>+2</sup></td> <td>y<sub>4</sub></td> <td>y<sub>4</sub></td> <td>y<sub>4</sub></td> <td>y<sub>6</sub></td> <td>b<sub>15</sub>-H<sub>2</sub>O<sup>+2</sup></td> <td>y<sub>21</sub><sup>+3</sup></td> <td>y<sub>22</sub><sup>+3</sup></td> <td>y<sub>7</sub></td> <td>y<sub>8</sub></td> </tr> <tr> <td>Delta ppm</td> <td>-4.6</td> <td>-15.4</td> <td>-8.0</td> <td>-0.3</td> <td>-1.6</td> <td>-13.9</td> <td>-6.2</td> <td>-10.5</td> <td>-5.4</td> <td>0.5</td> <td>9.7</td> <td>5.8</td> <td>3.6</td> <td></td> <td></td> <td></td> <td></td> <td></td> <td></td> <td>2.1</td> <td>-4.9</td> <td>6.6</td> <td>-6.6</td> <td>9.6</td> <td>1.3</td> </tr> </tbody> </table> |        |                  |        |                  |                |                                                                    |                                 |                            |                             |                    |         |                        |                              |                                                                      | Fragment-ion (m/z)           | 70.065         | 74.059         | 84.080                | 86.096                | 110.071                                         | 120.080                       | 233.165                       | 234.166               | 261.158        | 274.122  | 362.209 | 389.154 | 518.296 | 566.807 <sup>+2</sup> | 571.601 | 576.264 | 631.372 | 692.289 <sup>+2</sup> | 799.348 <sup>+2</sup> | 859.490 | 863.882 <sup>+2</sup> | 876.762 <sup>+3</sup> | 910.433 <sup>+3</sup> | 972.582 | 1132.604 | Frac. Inten. (% of TIC) | 0.00 | 2.39 | 0.07 | 0.43 | 0.07 | 0.35 | 14.71 | 2.81 | 9.02 | 2.59 | 4.13 | 2.80 | 6.30 | 2.54 | 2.53 | 2.08 | 5.28 | 4.18 | 2.59 | 7.14 | 3.45 | 5.41 | 6.42 | 7.01 | 5.70 | Rel. Inten. (% of BP) | 0.03 | 16.25 | 0.45 | 2.92 | 0.47 | 2.35 | 100.00 | 19.13 | 61.33 | 17.58 | 28.08 | 19.06 | 42.86 | 17.28 | 17.21 | 14.13 | 35.88 | 28.45 | 17.58 | 48.55 | 23.44 | 36.77 | 43.68 | 47.63 | 38.73 | Score | 0.20 | 1.50 | 0.50 | 0.22 | 1.00 | 1.00 | 0.50 | -0.19 | 0.50 | 0.75 | 0.50 | 0.75 | 1.50 | 1.50 | -0.17 | -0.14 | 1.50 | -0.28 | -0.18 | 1.50 | 1.50 | 1.50 | 1.50 | 1.50 | 1.50 | Ion-type | PR | y <sup>++1</sup> | KQ | LI | H | a <sub>1</sub> | b <sub>2</sub> | b <sub>2</sub> | CL | b <sub>3</sub> | CLD | y <sub>3</sub> | y <sub>6</sub> <sup>+2</sup> | y <sub>6</sub> <sup>+2</sup> | y <sub>6</sub> <sup>+2</sup> | y <sub>4</sub> | y <sub>4</sub> | y <sub>4</sub> | y <sub>6</sub> | b <sub>15</sub> -H <sub>2</sub> O <sup>+2</sup> | y <sub>21</sub> <sup>+3</sup> | y <sub>22</sub> <sup>+3</sup> | y <sub>7</sub> | y <sub>8</sub> | Delta ppm | -4.6 | -15.4 | -8.0 | -0.3 | -1.6 | -13.9 | -6.2 | -10.5 | -5.4 | 0.5 | 9.7 | 5.8 | 3.6 |  |  |  |  |  |  | 2.1 | -4.9 | 6.6 | -6.6 | 9.6 | 1.3 |
| Fragment-ion (m/z)                                                                                                                                                                                                                                                                                                                                                                                                                                                                                                                                                                                                                                                                                                                                                                                                                                                                                                                                                                                                                                                                                                                                                                                                                                                                                                                                                                                                                                                                                                                                                                                                                                                                                                                                                                                                                                                                                                                                                                                                                                                                                                                                                                                                                                                                                                                                                                                                                                                                                                                                                                                                                                                                                                                                                                                                                                                | 70.065 | 74.059           | 84.080 | 86.096           | 110.071        | 120.080                                                            | 233.165                         | 234.166                    | 261.158                     | 274.122            | 362.209 | 389.154                | 518.296                      | 566.807 <sup>+2</sup>                                                | 571.601                      | 576.264        | 631.372        | 692.289 <sup>+2</sup> | 799.348 <sup>+2</sup> | 859.490                                         | 863.882 <sup>+2</sup>         | 876.762 <sup>+3</sup>         | 910.433 <sup>+3</sup> | 972.582        | 1132.604 |         |         |         |                       |         |         |         |                       |                       |         |                       |                       |                       |         |          |                         |      |      |      |      |      |      |       |      |      |      |      |      |      |      |      |      |      |      |      |      |      |      |      |      |      |                       |      |       |      |      |      |      |        |       |       |       |       |       |       |       |       |       |       |       |       |       |       |       |       |       |       |       |      |      |      |      |      |      |      |       |      |      |      |      |      |      |       |       |      |       |       |      |      |      |      |      |      |          |    |                  |    |    |   |                |                |                |    |                |     |                |                              |                              |                              |                |                |                |                |                                                 |                               |                               |                |                |           |      |       |      |      |      |       |      |       |      |     |     |     |     |  |  |  |  |  |  |     |      |     |      |     |     |
| Frac. Inten. (% of TIC)                                                                                                                                                                                                                                                                                                                                                                                                                                                                                                                                                                                                                                                                                                                                                                                                                                                                                                                                                                                                                                                                                                                                                                                                                                                                                                                                                                                                                                                                                                                                                                                                                                                                                                                                                                                                                                                                                                                                                                                                                                                                                                                                                                                                                                                                                                                                                                                                                                                                                                                                                                                                                                                                                                                                                                                                                                           | 0.00   | 2.39             | 0.07   | 0.43             | 0.07           | 0.35                                                               | 14.71                           | 2.81                       | 9.02                        | 2.59               | 4.13    | 2.80                   | 6.30                         | 2.54                                                                 | 2.53                         | 2.08           | 5.28           | 4.18                  | 2.59                  | 7.14                                            | 3.45                          | 5.41                          | 6.42                  | 7.01           | 5.70     |         |         |         |                       |         |         |         |                       |                       |         |                       |                       |                       |         |          |                         |      |      |      |      |      |      |       |      |      |      |      |      |      |      |      |      |      |      |      |      |      |      |      |      |      |                       |      |       |      |      |      |      |        |       |       |       |       |       |       |       |       |       |       |       |       |       |       |       |       |       |       |       |      |      |      |      |      |      |      |       |      |      |      |      |      |      |       |       |      |       |       |      |      |      |      |      |      |          |    |                  |    |    |   |                |                |                |    |                |     |                |                              |                              |                              |                |                |                |                |                                                 |                               |                               |                |                |           |      |       |      |      |      |       |      |       |      |     |     |     |     |  |  |  |  |  |  |     |      |     |      |     |     |
| Rel. Inten. (% of BP)                                                                                                                                                                                                                                                                                                                                                                                                                                                                                                                                                                                                                                                                                                                                                                                                                                                                                                                                                                                                                                                                                                                                                                                                                                                                                                                                                                                                                                                                                                                                                                                                                                                                                                                                                                                                                                                                                                                                                                                                                                                                                                                                                                                                                                                                                                                                                                                                                                                                                                                                                                                                                                                                                                                                                                                                                                             | 0.03   | 16.25            | 0.45   | 2.92             | 0.47           | 2.35                                                               | 100.00                          | 19.13                      | 61.33                       | 17.58              | 28.08   | 19.06                  | 42.86                        | 17.28                                                                | 17.21                        | 14.13          | 35.88          | 28.45                 | 17.58                 | 48.55                                           | 23.44                         | 36.77                         | 43.68                 | 47.63          | 38.73    |         |         |         |                       |         |         |         |                       |                       |         |                       |                       |                       |         |          |                         |      |      |      |      |      |      |       |      |      |      |      |      |      |      |      |      |      |      |      |      |      |      |      |      |      |                       |      |       |      |      |      |      |        |       |       |       |       |       |       |       |       |       |       |       |       |       |       |       |       |       |       |       |      |      |      |      |      |      |      |       |      |      |      |      |      |      |       |       |      |       |       |      |      |      |      |      |      |          |    |                  |    |    |   |                |                |                |    |                |     |                |                              |                              |                              |                |                |                |                |                                                 |                               |                               |                |                |           |      |       |      |      |      |       |      |       |      |     |     |     |     |  |  |  |  |  |  |     |      |     |      |     |     |
| Score                                                                                                                                                                                                                                                                                                                                                                                                                                                                                                                                                                                                                                                                                                                                                                                                                                                                                                                                                                                                                                                                                                                                                                                                                                                                                                                                                                                                                                                                                                                                                                                                                                                                                                                                                                                                                                                                                                                                                                                                                                                                                                                                                                                                                                                                                                                                                                                                                                                                                                                                                                                                                                                                                                                                                                                                                                                             | 0.20   | 1.50             | 0.50   | 0.22             | 1.00           | 1.00                                                               | 0.50                            | -0.19                      | 0.50                        | 0.75               | 0.50    | 0.75                   | 1.50                         | 1.50                                                                 | -0.17                        | -0.14          | 1.50           | -0.28                 | -0.18                 | 1.50                                            | 1.50                          | 1.50                          | 1.50                  | 1.50           | 1.50     |         |         |         |                       |         |         |         |                       |                       |         |                       |                       |                       |         |          |                         |      |      |      |      |      |      |       |      |      |      |      |      |      |      |      |      |      |      |      |      |      |      |      |      |      |                       |      |       |      |      |      |      |        |       |       |       |       |       |       |       |       |       |       |       |       |       |       |       |       |       |       |       |      |      |      |      |      |      |      |       |      |      |      |      |      |      |       |       |      |       |       |      |      |      |      |      |      |          |    |                  |    |    |   |                |                |                |    |                |     |                |                              |                              |                              |                |                |                |                |                                                 |                               |                               |                |                |           |      |       |      |      |      |       |      |       |      |     |     |     |     |  |  |  |  |  |  |     |      |     |      |     |     |
| Ion-type                                                                                                                                                                                                                                                                                                                                                                                                                                                                                                                                                                                                                                                                                                                                                                                                                                                                                                                                                                                                                                                                                                                                                                                                                                                                                                                                                                                                                                                                                                                                                                                                                                                                                                                                                                                                                                                                                                                                                                                                                                                                                                                                                                                                                                                                                                                                                                                                                                                                                                                                                                                                                                                                                                                                                                                                                                                          | PR     | y <sup>++1</sup> | KQ     | LI               | H              | a <sub>1</sub>                                                     | b <sub>2</sub>                  | b <sub>2</sub>             | CL                          | b <sub>3</sub>     | CLD     | y <sub>3</sub>         | y <sub>6</sub> <sup>+2</sup> | y <sub>6</sub> <sup>+2</sup>                                         | y <sub>6</sub> <sup>+2</sup> | y <sub>4</sub> | y <sub>4</sub> | y <sub>4</sub>        | y <sub>6</sub>        | b <sub>15</sub> -H <sub>2</sub> O <sup>+2</sup> | y <sub>21</sub> <sup>+3</sup> | y <sub>22</sub> <sup>+3</sup> | y <sub>7</sub>        | y <sub>8</sub> |          |         |         |         |                       |         |         |         |                       |                       |         |                       |                       |                       |         |          |                         |      |      |      |      |      |      |       |      |      |      |      |      |      |      |      |      |      |      |      |      |      |      |      |      |      |                       |      |       |      |      |      |      |        |       |       |       |       |       |       |       |       |       |       |       |       |       |       |       |       |       |       |       |      |      |      |      |      |      |      |       |      |      |      |      |      |      |       |       |      |       |       |      |      |      |      |      |      |          |    |                  |    |    |   |                |                |                |    |                |     |                |                              |                              |                              |                |                |                |                |                                                 |                               |                               |                |                |           |      |       |      |      |      |       |      |       |      |     |     |     |     |  |  |  |  |  |  |     |      |     |      |     |     |
| Delta ppm                                                                                                                                                                                                                                                                                                                                                                                                                                                                                                                                                                                                                                                                                                                                                                                                                                                                                                                                                                                                                                                                                                                                                                                                                                                                                                                                                                                                                                                                                                                                                                                                                                                                                                                                                                                                                                                                                                                                                                                                                                                                                                                                                                                                                                                                                                                                                                                                                                                                                                                                                                                                                                                                                                                                                                                                                                                         | -4.6   | -15.4            | -8.0   | -0.3             | -1.6           | -13.9                                                              | -6.2                            | -10.5                      | -5.4                        | 0.5                | 9.7     | 5.8                    | 3.6                          |                                                                      |                              |                |                |                       |                       | 2.1                                             | -4.9                          | 6.6                           | -6.6                  | 9.6            | 1.3      |         |         |         |                       |         |         |         |                       |                       |         |                       |                       |                       |         |          |                         |      |      |      |      |      |      |       |      |      |      |      |      |      |      |      |      |      |      |      |      |      |      |      |      |      |                       |      |       |      |      |      |      |        |       |       |       |       |       |       |       |       |       |       |       |       |       |       |       |       |       |       |       |      |      |      |      |      |      |      |       |      |      |      |      |      |      |       |       |      |       |       |      |      |      |      |      |      |          |    |                  |    |    |   |                |                |                |    |                |     |                |                              |                              |                              |                |                |                |                |                                                 |                               |                               |                |                |           |      |       |      |      |      |       |      |       |      |     |     |     |     |  |  |  |  |  |  |     |      |     |      |     |     |

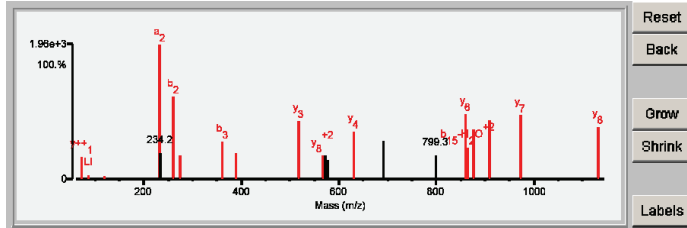



Result Summary

| Rank | Score | SPI (%) | BCS | # Unmatched ions | Variable sites | Sequence                        | MH <sup>+</sup> Calculated (Da) | MH <sup>+</sup> Error (Da) | MH <sup>+</sup> Error (ppm) | Protein MW/pl (Da) | Species | Accession #             | Protein Name                                                              |
|------|-------|---------|-----|------------------|----------------|---------------------------------|---------------------------------|----------------------------|-----------------------------|--------------------|---------|-------------------------|---------------------------------------------------------------------------|
| 1    | 18.97 | 84.3    | 9   | 6/25             | K121k          | (K)FLTPCYHPNVDTGQNICLDILKEK(W)  | 2875.4117                       | 114.0765                   | 11.2                        | 19652.4/6.83       | HUMAN   | <a href="#">O00762</a>  | Ubiquitin-conjugating enzyme E2 C OS=Homo sapiens GN=UBE2C PE=1 SV=1      |
| 2    | 17.97 | 84.3    | 8   | 6/25             | K119k          | (K)FLTPCYHPNVDTGQNICLDILKEK(W)  | 2875.4117                       | 114.0765                   | 11.2                        | 19652.4/6.83       | HUMAN   | <a href="#">O00762</a>  | Ubiquitin-conjugating enzyme E2 C OS=Homo sapiens GN=UBE2C PE=1 SV=1      |
| 3    | 6.36  | 57.9    | 2   | 12/25            | K321k K324k    | (K)GTRFALKELFDEANWSDIKYK(S)     | 2761.3832                       | 228.1050                   | 6.4                         | 83655.3/9.27       | HUMAN   | <a href="#">RQ13823</a> | REVERSE Nucleolar GTP-binding protein 2 OS=Homo sapiens GN=GNL2 PE=1 SV=1 |
| 4    | 5.92  | 54.7    | 4   | 12/25            | M265m K289k    | (R)mKLATKDAKELFPREPNEGSEIPMK(L) | 2859.4743                       | 130.0139                   | -8.0                        | 80685.0/8.90       | HUMAN   | <a href="#">RO60563</a> | REVERSE Cyclin-T1 OS=Homo sapiens GN=CCNT1 PE=1 SV=1                      |
| 5    | 5.32  | 57.1    | 2   | 12/25            | K770k          | (K)DKFELSRVNNYISLTFHDIYK(I)     | 2875.4447                       | 114.0434                   | 0.2                         | 470773.9/6.05      | HUMAN   | <a href="#">RQ8TD57</a> | REVERSE Dynein heavy chain 3, axonemal OS=Homo sapiens GN=DNAH3 PE=2 SV=1 |

Detailed Results

| Rank                                                                                                                                                                                                                                                                                                                                                                                                                                                                                                                                                                                                                                                                                                                                                                                                                                                                                                                                                                                                                                                                                                                                                                                                                                                                                                                                                                                                                                                                                                                                                                                                                                                                                                                                                                                                                                                                                                                                                                                                                                                                                                                                                                                                                                                                                                                                                                                                                                                                                                                                                                                                                                                                                                                          | Score  | SPI (%) | BCS    | # Unmatched ions | Variable sites | Sequence                                                           | MH <sup>+</sup> Calculated (Da) | MH <sup>+</sup> Error (Da) | MH <sup>+</sup> Error (ppm) | Protein MW/pl (Da) | Species | Accession #            | MS-Digest Index #      | Protein Name                                                         |                    |                       |                       |                       |         |                       |                       |                       |                       |         |          |         |         |                       |                       |         |                       |                       |                       |         |                       |                       |                       |                       |         |          |                         |      |      |      |      |      |       |      |      |      |      |      |      |      |      |      |      |      |      |      |      |      |      |      |      |      |                       |      |      |      |      |       |        |       |       |       |       |       |       |       |      |       |       |       |       |       |       |       |       |       |       |       |       |      |      |      |      |       |      |       |       |      |      |      |      |      |      |      |       |       |       |      |      |      |      |      |      |      |          |    |    |    |    |    |    |    |     |    |                  |    |                  |                  |                  |    |    |    |                       |    |                       |                   |                   |    |    |           |     |       |      |       |       |      |      |      |      |      |      |      |      |      |     |  |  |     |      |      |      |      |     |      |
|-------------------------------------------------------------------------------------------------------------------------------------------------------------------------------------------------------------------------------------------------------------------------------------------------------------------------------------------------------------------------------------------------------------------------------------------------------------------------------------------------------------------------------------------------------------------------------------------------------------------------------------------------------------------------------------------------------------------------------------------------------------------------------------------------------------------------------------------------------------------------------------------------------------------------------------------------------------------------------------------------------------------------------------------------------------------------------------------------------------------------------------------------------------------------------------------------------------------------------------------------------------------------------------------------------------------------------------------------------------------------------------------------------------------------------------------------------------------------------------------------------------------------------------------------------------------------------------------------------------------------------------------------------------------------------------------------------------------------------------------------------------------------------------------------------------------------------------------------------------------------------------------------------------------------------------------------------------------------------------------------------------------------------------------------------------------------------------------------------------------------------------------------------------------------------------------------------------------------------------------------------------------------------------------------------------------------------------------------------------------------------------------------------------------------------------------------------------------------------------------------------------------------------------------------------------------------------------------------------------------------------------------------------------------------------------------------------------------------------|--------|---------|--------|------------------|----------------|--------------------------------------------------------------------|---------------------------------|----------------------------|-----------------------------|--------------------|---------|------------------------|------------------------|----------------------------------------------------------------------|--------------------|-----------------------|-----------------------|-----------------------|---------|-----------------------|-----------------------|-----------------------|-----------------------|---------|----------|---------|---------|-----------------------|-----------------------|---------|-----------------------|-----------------------|-----------------------|---------|-----------------------|-----------------------|-----------------------|-----------------------|---------|----------|-------------------------|------|------|------|------|------|-------|------|------|------|------|------|------|------|------|------|------|------|------|------|------|------|------|------|------|------|-----------------------|------|------|------|------|-------|--------|-------|-------|-------|-------|-------|-------|-------|------|-------|-------|-------|-------|-------|-------|-------|-------|-------|-------|-------|-------|------|------|------|------|-------|------|-------|-------|------|------|------|------|------|------|------|-------|-------|-------|------|------|------|------|------|------|------|----------|----|----|----|----|----|----|----|-----|----|------------------|----|------------------|------------------|------------------|----|----|----|-----------------------|----|-----------------------|-------------------|-------------------|----|----|-----------|-----|-------|------|-------|-------|------|------|------|------|------|------|------|------|------|-----|--|--|-----|------|------|------|------|-----|------|
| 1                                                                                                                                                                                                                                                                                                                                                                                                                                                                                                                                                                                                                                                                                                                                                                                                                                                                                                                                                                                                                                                                                                                                                                                                                                                                                                                                                                                                                                                                                                                                                                                                                                                                                                                                                                                                                                                                                                                                                                                                                                                                                                                                                                                                                                                                                                                                                                                                                                                                                                                                                                                                                                                                                                                             | 18.97  | 84.3    | 9      | 6/25             | K121k          | (K)F L T P C Y H P N V D T Q G N / L / C / L / D L / L / K E K (W) | 2875.4117                       | 114.0765                   | 11.2                        | 19652.4/6.83       | HUMAN   | <a href="#">O00762</a> | <a href="#">812551</a> | Ubiquitin-conjugating enzyme E2 C OS=Homo sapiens GN=UBE2C PE=1 SV=1 |                    |                       |                       |                       |         |                       |                       |                       |                       |         |          |         |         |                       |                       |         |                       |                       |                       |         |                       |                       |                       |                       |         |          |                         |      |      |      |      |      |       |      |      |      |      |      |      |      |      |      |      |      |      |      |      |      |      |      |      |      |                       |      |      |      |      |       |        |       |       |       |       |       |       |       |      |       |       |       |       |       |       |       |       |       |       |       |       |      |      |      |      |       |      |       |       |      |      |      |      |      |      |      |       |       |       |      |      |      |      |      |      |      |          |    |    |    |    |    |    |    |     |    |                  |    |                  |                  |                  |    |    |    |                       |    |                       |                   |                   |    |    |           |     |       |      |       |       |      |      |      |      |      |      |      |      |      |     |  |  |     |      |      |      |      |     |      |
| <table border="1"> <thead> <tr> <th>Fragment-ion (m/z)</th> <th>70.065</th> <th>84.080</th> <th>86.096</th> <th>120.080</th> <th>133.042</th> <th>233.164</th> <th>234.169</th> <th>246.126</th> <th>261.160</th> <th>362.206</th> <th>389.147</th> <th>518.291</th> <th>566.811<sup>+2</sup></th> <th>623.346<sup>+2</sup></th> <th>631.379</th> <th>692.285<sup>+2</sup></th> <th>734.311<sup>+2</sup></th> <th>799.361<sup>+2</sup></th> <th>859.494</th> <th>863.896<sup>+2</sup></th> <th>871.079<sup>+3</sup></th> <th>876.766<sup>+3</sup></th> <th>910.454<sup>+3</sup></th> <th>972.574</th> <th>1132.602</th> </tr> </thead> <tbody> <tr> <td>Frac. Inten. (% of TIC)</td> <td>0.00</td> <td>0.14</td> <td>0.54</td> <td>0.43</td> <td>2.31</td> <td>16.48</td> <td>2.42</td> <td>2.11</td> <td>9.68</td> <td>4.94</td> <td>2.40</td> <td>4.30</td> <td>2.46</td> <td>1.64</td> <td>5.02</td> <td>3.88</td> <td>2.44</td> <td>2.51</td> <td>6.74</td> <td>3.77</td> <td>2.24</td> <td>6.62</td> <td>5.07</td> <td>4.21</td> <td>7.64</td> </tr> <tr> <td>Rel. Inten. (% of BP)</td> <td>0.01</td> <td>0.83</td> <td>3.27</td> <td>2.63</td> <td>14.05</td> <td>100.00</td> <td>14.70</td> <td>12.78</td> <td>58.73</td> <td>29.97</td> <td>14.55</td> <td>26.11</td> <td>14.92</td> <td>9.93</td> <td>30.49</td> <td>23.52</td> <td>14.83</td> <td>15.25</td> <td>40.92</td> <td>22.88</td> <td>13.60</td> <td>40.20</td> <td>30.78</td> <td>25.58</td> <td>46.39</td> </tr> <tr> <td>Score</td> <td>0.20</td> <td>0.50</td> <td>0.22</td> <td>1.00</td> <td>-0.14</td> <td>0.50</td> <td>-0.15</td> <td>-0.13</td> <td>1.50</td> <td>0.50</td> <td>0.75</td> <td>1.50</td> <td>1.50</td> <td>1.50</td> <td>1.50</td> <td>-0.24</td> <td>-0.15</td> <td>-0.15</td> <td>1.50</td> <td>0.25</td> <td>0.50</td> <td>1.50</td> <td>1.50</td> <td>1.50</td> <td>1.50</td> </tr> <tr> <td>Ion-type</td> <td>PR</td> <td>KQ</td> <td>LI</td> <td>a1</td> <td>a2</td> <td>b2</td> <td>b3</td> <td>CLD</td> <td>y3</td> <td>y6<sup>+2</sup></td> <td>y3</td> <td>y6<sup>+2</sup></td> <td>y6<sup>+2</sup></td> <td>y9<sup>+2</sup></td> <td>y4</td> <td>y6</td> <td>y6</td> <td>b15-H2O<sup>+2</sup></td> <td>y6</td> <td>y21-NH3<sup>+3</sup></td> <td>y21<sup>+3</sup></td> <td>b23<sup>+3</sup></td> <td>y7</td> <td>y8</td> </tr> <tr> <td>Delta ppm</td> <td>1.1</td> <td>-14.0</td> <td>-4.9</td> <td>-18.1</td> <td>-1.00</td> <td>-6.6</td> <td>-4.4</td> <td>-7.3</td> <td>-4.6</td> <td>-7.3</td> <td>-8.8</td> <td>-4.6</td> <td>10.3</td> <td>-1.3</td> <td>2.8</td> <td></td> <td></td> <td>6.9</td> <td>11.7</td> <td>-1.8</td> <td>11.1</td> <td>14.3</td> <td>1.4</td> <td>-1.2</td> </tr> </tbody> </table> |        |         |        |                  |                |                                                                    |                                 |                            |                             |                    |         |                        |                        |                                                                      | Fragment-ion (m/z) | 70.065                | 84.080                | 86.096                | 120.080 | 133.042               | 233.164               | 234.169               | 246.126               | 261.160 | 362.206  | 389.147 | 518.291 | 566.811 <sup>+2</sup> | 623.346 <sup>+2</sup> | 631.379 | 692.285 <sup>+2</sup> | 734.311 <sup>+2</sup> | 799.361 <sup>+2</sup> | 859.494 | 863.896 <sup>+2</sup> | 871.079 <sup>+3</sup> | 876.766 <sup>+3</sup> | 910.454 <sup>+3</sup> | 972.574 | 1132.602 | Frac. Inten. (% of TIC) | 0.00 | 0.14 | 0.54 | 0.43 | 2.31 | 16.48 | 2.42 | 2.11 | 9.68 | 4.94 | 2.40 | 4.30 | 2.46 | 1.64 | 5.02 | 3.88 | 2.44 | 2.51 | 6.74 | 3.77 | 2.24 | 6.62 | 5.07 | 4.21 | 7.64 | Rel. Inten. (% of BP) | 0.01 | 0.83 | 3.27 | 2.63 | 14.05 | 100.00 | 14.70 | 12.78 | 58.73 | 29.97 | 14.55 | 26.11 | 14.92 | 9.93 | 30.49 | 23.52 | 14.83 | 15.25 | 40.92 | 22.88 | 13.60 | 40.20 | 30.78 | 25.58 | 46.39 | Score | 0.20 | 0.50 | 0.22 | 1.00 | -0.14 | 0.50 | -0.15 | -0.13 | 1.50 | 0.50 | 0.75 | 1.50 | 1.50 | 1.50 | 1.50 | -0.24 | -0.15 | -0.15 | 1.50 | 0.25 | 0.50 | 1.50 | 1.50 | 1.50 | 1.50 | Ion-type | PR | KQ | LI | a1 | a2 | b2 | b3 | CLD | y3 | y6 <sup>+2</sup> | y3 | y6 <sup>+2</sup> | y6 <sup>+2</sup> | y9 <sup>+2</sup> | y4 | y6 | y6 | b15-H2O <sup>+2</sup> | y6 | y21-NH3 <sup>+3</sup> | y21 <sup>+3</sup> | b23 <sup>+3</sup> | y7 | y8 | Delta ppm | 1.1 | -14.0 | -4.9 | -18.1 | -1.00 | -6.6 | -4.4 | -7.3 | -4.6 | -7.3 | -8.8 | -4.6 | 10.3 | -1.3 | 2.8 |  |  | 6.9 | 11.7 | -1.8 | 11.1 | 14.3 | 1.4 | -1.2 |
| Fragment-ion (m/z)                                                                                                                                                                                                                                                                                                                                                                                                                                                                                                                                                                                                                                                                                                                                                                                                                                                                                                                                                                                                                                                                                                                                                                                                                                                                                                                                                                                                                                                                                                                                                                                                                                                                                                                                                                                                                                                                                                                                                                                                                                                                                                                                                                                                                                                                                                                                                                                                                                                                                                                                                                                                                                                                                                            | 70.065 | 84.080  | 86.096 | 120.080          | 133.042        | 233.164                                                            | 234.169                         | 246.126                    | 261.160                     | 362.206            | 389.147 | 518.291                | 566.811 <sup>+2</sup>  | 623.346 <sup>+2</sup>                                                | 631.379            | 692.285 <sup>+2</sup> | 734.311 <sup>+2</sup> | 799.361 <sup>+2</sup> | 859.494 | 863.896 <sup>+2</sup> | 871.079 <sup>+3</sup> | 876.766 <sup>+3</sup> | 910.454 <sup>+3</sup> | 972.574 | 1132.602 |         |         |                       |                       |         |                       |                       |                       |         |                       |                       |                       |                       |         |          |                         |      |      |      |      |      |       |      |      |      |      |      |      |      |      |      |      |      |      |      |      |      |      |      |      |      |                       |      |      |      |      |       |        |       |       |       |       |       |       |       |      |       |       |       |       |       |       |       |       |       |       |       |       |      |      |      |      |       |      |       |       |      |      |      |      |      |      |      |       |       |       |      |      |      |      |      |      |      |          |    |    |    |    |    |    |    |     |    |                  |    |                  |                  |                  |    |    |    |                       |    |                       |                   |                   |    |    |           |     |       |      |       |       |      |      |      |      |      |      |      |      |      |     |  |  |     |      |      |      |      |     |      |
| Frac. Inten. (% of TIC)                                                                                                                                                                                                                                                                                                                                                                                                                                                                                                                                                                                                                                                                                                                                                                                                                                                                                                                                                                                                                                                                                                                                                                                                                                                                                                                                                                                                                                                                                                                                                                                                                                                                                                                                                                                                                                                                                                                                                                                                                                                                                                                                                                                                                                                                                                                                                                                                                                                                                                                                                                                                                                                                                                       | 0.00   | 0.14    | 0.54   | 0.43             | 2.31           | 16.48                                                              | 2.42                            | 2.11                       | 9.68                        | 4.94               | 2.40    | 4.30                   | 2.46                   | 1.64                                                                 | 5.02               | 3.88                  | 2.44                  | 2.51                  | 6.74    | 3.77                  | 2.24                  | 6.62                  | 5.07                  | 4.21    | 7.64     |         |         |                       |                       |         |                       |                       |                       |         |                       |                       |                       |                       |         |          |                         |      |      |      |      |      |       |      |      |      |      |      |      |      |      |      |      |      |      |      |      |      |      |      |      |      |                       |      |      |      |      |       |        |       |       |       |       |       |       |       |      |       |       |       |       |       |       |       |       |       |       |       |       |      |      |      |      |       |      |       |       |      |      |      |      |      |      |      |       |       |       |      |      |      |      |      |      |      |          |    |    |    |    |    |    |    |     |    |                  |    |                  |                  |                  |    |    |    |                       |    |                       |                   |                   |    |    |           |     |       |      |       |       |      |      |      |      |      |      |      |      |      |     |  |  |     |      |      |      |      |     |      |
| Rel. Inten. (% of BP)                                                                                                                                                                                                                                                                                                                                                                                                                                                                                                                                                                                                                                                                                                                                                                                                                                                                                                                                                                                                                                                                                                                                                                                                                                                                                                                                                                                                                                                                                                                                                                                                                                                                                                                                                                                                                                                                                                                                                                                                                                                                                                                                                                                                                                                                                                                                                                                                                                                                                                                                                                                                                                                                                                         | 0.01   | 0.83    | 3.27   | 2.63             | 14.05          | 100.00                                                             | 14.70                           | 12.78                      | 58.73                       | 29.97              | 14.55   | 26.11                  | 14.92                  | 9.93                                                                 | 30.49              | 23.52                 | 14.83                 | 15.25                 | 40.92   | 22.88                 | 13.60                 | 40.20                 | 30.78                 | 25.58   | 46.39    |         |         |                       |                       |         |                       |                       |                       |         |                       |                       |                       |                       |         |          |                         |      |      |      |      |      |       |      |      |      |      |      |      |      |      |      |      |      |      |      |      |      |      |      |      |      |                       |      |      |      |      |       |        |       |       |       |       |       |       |       |      |       |       |       |       |       |       |       |       |       |       |       |       |      |      |      |      |       |      |       |       |      |      |      |      |      |      |      |       |       |       |      |      |      |      |      |      |      |          |    |    |    |    |    |    |    |     |    |                  |    |                  |                  |                  |    |    |    |                       |    |                       |                   |                   |    |    |           |     |       |      |       |       |      |      |      |      |      |      |      |      |      |     |  |  |     |      |      |      |      |     |      |
| Score                                                                                                                                                                                                                                                                                                                                                                                                                                                                                                                                                                                                                                                                                                                                                                                                                                                                                                                                                                                                                                                                                                                                                                                                                                                                                                                                                                                                                                                                                                                                                                                                                                                                                                                                                                                                                                                                                                                                                                                                                                                                                                                                                                                                                                                                                                                                                                                                                                                                                                                                                                                                                                                                                                                         | 0.20   | 0.50    | 0.22   | 1.00             | -0.14          | 0.50                                                               | -0.15                           | -0.13                      | 1.50                        | 0.50               | 0.75    | 1.50                   | 1.50                   | 1.50                                                                 | 1.50               | -0.24                 | -0.15                 | -0.15                 | 1.50    | 0.25                  | 0.50                  | 1.50                  | 1.50                  | 1.50    | 1.50     |         |         |                       |                       |         |                       |                       |                       |         |                       |                       |                       |                       |         |          |                         |      |      |      |      |      |       |      |      |      |      |      |      |      |      |      |      |      |      |      |      |      |      |      |      |      |                       |      |      |      |      |       |        |       |       |       |       |       |       |       |      |       |       |       |       |       |       |       |       |       |       |       |       |      |      |      |      |       |      |       |       |      |      |      |      |      |      |      |       |       |       |      |      |      |      |      |      |      |          |    |    |    |    |    |    |    |     |    |                  |    |                  |                  |                  |    |    |    |                       |    |                       |                   |                   |    |    |           |     |       |      |       |       |      |      |      |      |      |      |      |      |      |     |  |  |     |      |      |      |      |     |      |
| Ion-type                                                                                                                                                                                                                                                                                                                                                                                                                                                                                                                                                                                                                                                                                                                                                                                                                                                                                                                                                                                                                                                                                                                                                                                                                                                                                                                                                                                                                                                                                                                                                                                                                                                                                                                                                                                                                                                                                                                                                                                                                                                                                                                                                                                                                                                                                                                                                                                                                                                                                                                                                                                                                                                                                                                      | PR     | KQ      | LI     | a1               | a2             | b2                                                                 | b3                              | CLD                        | y3                          | y6 <sup>+2</sup>   | y3      | y6 <sup>+2</sup>       | y6 <sup>+2</sup>       | y9 <sup>+2</sup>                                                     | y4                 | y6                    | y6                    | b15-H2O <sup>+2</sup> | y6      | y21-NH3 <sup>+3</sup> | y21 <sup>+3</sup>     | b23 <sup>+3</sup>     | y7                    | y8      |          |         |         |                       |                       |         |                       |                       |                       |         |                       |                       |                       |                       |         |          |                         |      |      |      |      |      |       |      |      |      |      |      |      |      |      |      |      |      |      |      |      |      |      |      |      |      |                       |      |      |      |      |       |        |       |       |       |       |       |       |       |      |       |       |       |       |       |       |       |       |       |       |       |       |      |      |      |      |       |      |       |       |      |      |      |      |      |      |      |       |       |       |      |      |      |      |      |      |      |          |    |    |    |    |    |    |    |     |    |                  |    |                  |                  |                  |    |    |    |                       |    |                       |                   |                   |    |    |           |     |       |      |       |       |      |      |      |      |      |      |      |      |      |     |  |  |     |      |      |      |      |     |      |
| Delta ppm                                                                                                                                                                                                                                                                                                                                                                                                                                                                                                                                                                                                                                                                                                                                                                                                                                                                                                                                                                                                                                                                                                                                                                                                                                                                                                                                                                                                                                                                                                                                                                                                                                                                                                                                                                                                                                                                                                                                                                                                                                                                                                                                                                                                                                                                                                                                                                                                                                                                                                                                                                                                                                                                                                                     | 1.1    | -14.0   | -4.9   | -18.1            | -1.00          | -6.6                                                               | -4.4                            | -7.3                       | -4.6                        | -7.3               | -8.8    | -4.6                   | 10.3                   | -1.3                                                                 | 2.8                |                       |                       | 6.9                   | 11.7    | -1.8                  | 11.1                  | 14.3                  | 1.4                   | -1.2    |          |         |         |                       |                       |         |                       |                       |                       |         |                       |                       |                       |                       |         |          |                         |      |      |      |      |      |       |      |      |      |      |      |      |      |      |      |      |      |      |      |      |      |      |      |      |      |                       |      |      |      |      |       |        |       |       |       |       |       |       |       |      |       |       |       |       |       |       |       |       |       |       |       |       |      |      |      |      |       |      |       |       |      |      |      |      |      |      |      |       |       |       |      |      |      |      |      |      |      |          |    |    |    |    |    |    |    |     |    |                  |    |                  |                  |                  |    |    |    |                       |    |                       |                   |                   |    |    |           |     |       |      |       |       |      |      |      |      |      |      |      |      |      |     |  |  |     |      |      |      |      |     |      |

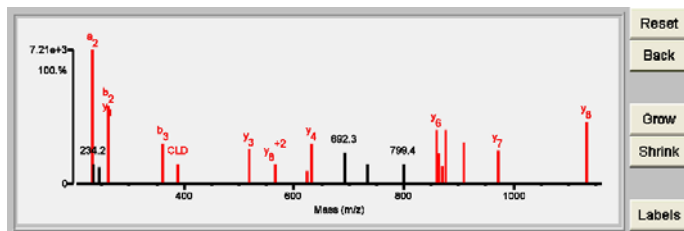

Result Summary

| Rank | Score | SPI (%) | BCS | # Unmatched Ions | Variable sites | Sequence                         | MH <sup>+</sup> Calculated (Da) | MH <sup>+</sup> Error (Da) | MH <sup>+</sup> Error (ppm) | Protein MW pI (Da) | Species | Accession # | Protein Name                                                           |
|------|-------|---------|-----|------------------|----------------|----------------------------------|---------------------------------|----------------------------|-----------------------------|--------------------|---------|-------------|------------------------------------------------------------------------|
| 1    | 23.83 | 95.5    | 14  | 1/25             | K136k          | (R)IYHCNINSGVCLDILKDNWSPALTIK(V) | 3372.7079                       | 114.0787                   | 10.3                        | 21404.3/8.77       | HUMAN   | P51965      | Ubiquitin-conjugating enzyme E2 E1 OS=Homo sapiens GN=UBE2E1 PE=1 SV=1 |
| 1    | 23.83 | 95.5    | 14  | 1/25             | K144k          | (R)IYHCNINSGVCLDILKDNWSPALTIK(V) | 3372.7079                       | 114.0787                   | 10.3                        | 22255.2/7.59       | HUMAN   | Q96LR5      | Ubiquitin-conjugating enzyme E2 E2 OS=Homo sapiens GN=UBE2E2 PE=1 SV=1 |
| 1    | 23.83 | 95.5    | 14  | 1/25             | K150k          | (R)IYHCNINSGVCLDILKDNWSPALTIK(V) | 3372.7079                       | 114.0787                   | 10.3                        | 22912.7/6.73       | HUMAN   | Q969T4      | Ubiquitin-conjugating enzyme E2 E3 OS=Homo sapiens GN=UBE2E3 PE=1 SV=1 |
| 2    | 11.92 | 64.6    | 9   | 7/25             | K147k          | (R)IYHCNINSGVCLDILKDNWSPALTIK(V) | 3372.7079                       | 114.0787                   | 10.3                        | 21404.3/8.77       | HUMAN   | P51965      | Ubiquitin-conjugating enzyme E2 E1 OS=Homo sapiens GN=UBE2E1 PE=1 SV=1 |
| 2    | 11.92 | 64.6    | 9   | 7/25             | K155k          | (R)IYHCNINSGVCLDILKDNWSPALTIK(V) | 3372.7079                       | 114.0787                   | 10.3                        | 22255.2/7.59       | HUMAN   | Q96LR5      | Ubiquitin-conjugating enzyme E2 E2 OS=Homo sapiens GN=UBE2E2 PE=1 SV=1 |

Detailed Results

| Rank | Score | SPI (%) | BCS | # Unmatched Ions | Variable sites | Sequence                         | MH <sup>+</sup> Calculated (Da) | MH <sup>+</sup> Error (Da) | MH <sup>+</sup> Error (ppm) | Protein MW pI (Da) | Species | Accession # | MS-Digest Index # | Protein Name                                                           |
|------|-------|---------|-----|------------------|----------------|----------------------------------|---------------------------------|----------------------------|-----------------------------|--------------------|---------|-------------|-------------------|------------------------------------------------------------------------|
| 1    | 23.83 | 95.5    | 14  | 1/25             | K136k          | (R)IYHCNINSGVCLDILKDNWSPALTIK(V) | 3372.7079                       | 114.0787                   | 10.3                        | 21404.3/8.77       | HUMAN   | P51965      | 811963            | Ubiquitin-conjugating enzyme E2 E1 OS=Homo sapiens GN=UBE2E1 PE=1 SV=1 |
| 1    | 23.83 | 95.5    | 14  | 1/25             | K144k          | (R)IYHCNINSGVCLDILKDNWSPALTIK(V) | 3372.7079                       | 114.0787                   | 10.3                        | 22255.2/7.59       | HUMAN   | Q96LR5      | 811967            | Ubiquitin-conjugating enzyme E2 E2 OS=Homo sapiens GN=UBE2E2 PE=1 SV=1 |
| 1    | 23.83 | 95.5    | 14  | 1/25             | K150k          | (R)IYHCNINSGVCLDILKDNWSPALTIK(V) | 3372.7079                       | 114.0787                   | 10.3                        | 22912.7/6.73       | HUMAN   | Q969T4      | 811973            | Ubiquitin-conjugating enzyme E2 E3 OS=Homo sapiens GN=UBE2E3 PE=1 SV=1 |

  

| Fragment-Ion (m/z)      | 72.080 | 86.096 | 234.145 | 274.125 | 366.228 <sup>+2</sup> | 389.148 | 448.281 | 501.231 <sup>+2</sup> | 594.271 <sup>+2</sup> | 629.806 <sup>+2</sup> | 634.781 <sup>+2</sup> | 643.787 <sup>+2</sup> | 729.446 | 737.390 <sup>+2</sup> | 801.378 | 816.484 | 907.993 <sup>+2</sup> | 915.403 | 964.510 <sup>+2</sup> | 1044.555 <sup>+2</sup> | 1101.086 <sup>+2</sup> | 1179.142 <sup>+2</sup> | 1187.551 | 1231.642 | 1286.596 |
|-------------------------|--------|--------|---------|---------|-----------------------|---------|---------|-----------------------|-----------------------|-----------------------|-----------------------|-----------------------|---------|-----------------------|---------|---------|-----------------------|---------|-----------------------|------------------------|------------------------|------------------------|----------|----------|----------|
| Frac. Inten. (% of TIC) | 0.11   | 10.26  | 4.18    | 2.59    | 4.29                  | 3.51    | 2.99    | 4.46                  | 4.25                  | 2.86                  | 2.43                  | 3.37                  | 10.63   | 2.79                  | 2.56    | 6.78    | 2.70                  | 3.41    | 2.71                  | 5.10                   | 6.90                   | 3.51                   | 2.84     | 2.07     | 2.71     |
| Rel. Inten. (% of BP)   | 1.00   | 96.51  | 39.31   | 24.37   | 40.37                 | 33.01   | 28.09   | 41.95                 | 39.92                 | 22.88                 | 31.73                 | 100.00                | 26.24   | 24.03                 | 63.74   | 25.35   | 32.03                 | 25.48   | 47.93                 | 64.89                  | 32.98                  | 26.72                  | 19.47    | 25.51    |          |
| Score                   | 0.50   | 0.50   | 1.50    | 0.75    | 1.50                  | 0.75    | 1.50    | -0.42                 | 0.50                  | 0.50                  | 0.25                  | 0.50                  | 1.50    | 0.50                  | 1.50    | 0.50    | 1.50                  | 0.50    | 1.50                  | 1.50                   | 1.50                   | 0.50                   | 1.50     | 0.50     |          |
| Ion-type                | V      | a1     | y2      | WS      | y <sup>+2</sup>       | CLD     | y4      |                       | b10 <sup>+2</sup>     | a11 <sup>+2</sup>     | b11-H2O <sup>+2</sup> | b11 <sup>+2</sup>     | y7      | y12 <sup>+2</sup>     | be      | y8      | y15 <sup>+2</sup>     | by      | y16 <sup>+2</sup>     | y17 <sup>+2</sup>      | y18 <sup>+2</sup>      | y20 <sup>+2</sup>      | b10      | y11      | b11      |
| Delta ppm               | -6.6   | -16.5  | 2.0     | 17.5    | -3.0                  | -4.4    | 9.6     |                       | 6.9                   | 2.5                   | -24.2                 | -21.9                 | -5.9    | 1.4                   | 6.7     | 2.1     | 8.1                   | -13.4   | -18.5                 | 11.1                   | 0.8                    | 9.5                    | 20.0     | 8.6      | -0.1     |

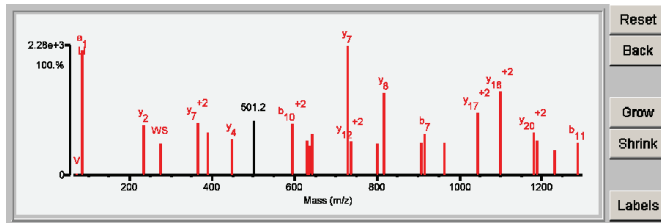

Result Summary

| Rank | Score | SPI (%) | BCS | # Unmatched Ions | # Variable sites | Sequence            | MH <sup>+</sup> Calculated (Da) | MH <sup>+</sup> Error (Da) | MH <sup>+</sup> Error (ppm) | Protein MW/pI (Da) | Species | Accession # | Protein Name                                                         |
|------|-------|---------|-----|------------------|------------------|---------------------|---------------------------------|----------------------------|-----------------------------|--------------------|---------|-------------|----------------------------------------------------------------------|
| 1    | 15.87 | 81.4    | 4   | 4/25             | K72k             | (K)IPETYPFNPPkVR(F) | 1557.8424                       | 114.0540                   | 6.6                         | 22406.8/5.33       | HUMAN   | P61086      | Ubiquitin-conjugating enzyme E2 K OS=Homo sapiens GN=UBE2K PE=1 SV=3 |

Detailed Results

| Rank                    | Score  | SPI (%) | BCS    | # Unmatched Ions | # Variable sites | Sequence                                 | MH <sup>+</sup> Calculated (Da) | MH <sup>+</sup> Error (Da) | MH <sup>+</sup> Error (ppm) | Protein MW/pI (Da) | Species          | Accession #          | MS-Digest Index # | Protein Name                                                         |                       |         |                       |         |         |         |                                  |                |                |                |                |     |
|-------------------------|--------|---------|--------|------------------|------------------|------------------------------------------|---------------------------------|----------------------------|-----------------------------|--------------------|------------------|----------------------|-------------------|----------------------------------------------------------------------|-----------------------|---------|-----------------------|---------|---------|---------|----------------------------------|----------------|----------------|----------------|----------------|-----|
| 1                       | 15.87  | 81.4    | 4      | 4/25             | K72k             | (K)I P E T Y \ P F \ N / P / P k V R (F) | 1557.8424                       | 114.0540                   | 6.6                         | 22406.8/5.33       | HUMAN            | P61086               | 812583            | Ubiquitin-conjugating enzyme E2 K OS=Homo sapiens GN=UBE2K PE=1 SV=3 |                       |         |                       |         |         |         |                                  |                |                |                |                |     |
| Fragment-ion (m/z)      | 70.065 | 72.081  | 84.046 | 84.080           | 86.095           | 87.054                                   | 110.071                         | 120.079                    | 136.077                     | 227.104            | 307.191          | 310.140              | 314.151           | 328.147                                                              | 355.719 <sup>+2</sup> | 439.271 | 473.208               | 491.216 | 514.930 | 576.312 | 586.299                          | 604.306        | 613.379        | 710.436        | 824.476        |     |
| Frac. Inten. (% of TIC) | 0.02   | 0.14    | 0.11   | 9.71             | 8.03             | 0.33                                     | 3.59                            | 0.32                       | 0.09                        | 2.98               | 3.44             | 4.22                 | 2.46              | 4.66                                                                 | 9.74                  | 3.17    | 2.50                  | 3.47    | 2.88    | 2.49    | 3.32                             | 4.38           | 10.87          | 13.15          | 3.93           |     |
| Rel. Inten. (% of BP)   | 0.18   | 1.09    | 0.83   | 73.84            | 61.03            | 2.51                                     | 27.31                           | 2.41                       | 0.71                        | 22.62              | 26.19            | 32.09                | 18.67             | 35.47                                                                | 74.05                 | 24.08   | 18.99                 | 26.34   | 21.89   | 18.91   | 25.26                            | 33.33          | 82.61          | 100.00         | 29.90          |     |
| Score                   | 0.20   | 0.50    | 1.00   | -0.74            | 0.50             | 0.33                                     | -0.27                           | 1.00                       | 1.00                        | 0.75               | 1.50             | 0.50                 | -0.19             | 0.75                                                                 | 1.50                  | 0.75    | 0.50                  | 0.75    | -0.22   | 0.50    | 0.25                             | 0.50           | 1.50           | 1.50           | 1.50           |     |
| Ion-type                | PR     | V       | E      |                  | a1               | NR                                       |                                 | F                          | Y                           | PE                 | y <sup>++4</sup> | PET-H <sub>2</sub> O |                   | PET                                                                  | y <sup>++2</sup>      | PKV     | ETYP-H <sub>2</sub> O |         | ETYP    |         | b <sub>s</sub> -H <sub>2</sub> O | b <sub>s</sub> | y <sub>4</sub> | y <sub>5</sub> | y <sub>6</sub> |     |
| Delta ppm               | -4.6   | 3.1     | 14.4   |                  | -31.6            | 0.50                                     |                                 | -15.6                      | 7.4                         | 1.2                | -6.0             | -1.8                 |                   | -15.0                                                                | -0.1                  | 8.1     | 8.9                   |         | 2.4     |         | 13.6                             | 18.9           | 12.6           | 1.3            | 7.3            | 2.7 |

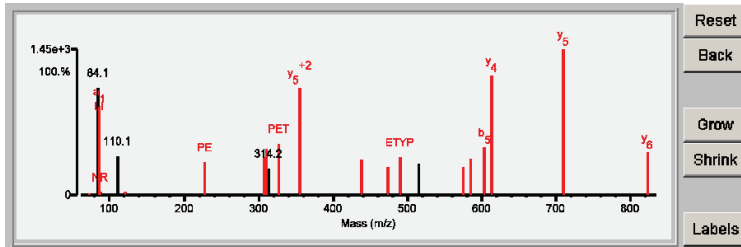

Reset  
Back  
Grow  
Shrink  
Labels

Result Summary

| Rank | Score | SPI (%) | BCS | # Unmatched Ions | Variable sites | Sequence                   | MH <sup>+</sup> Calculated (Da) | MH <sup>+</sup> Error (Da) | MH <sup>+</sup> Error (ppm) | Protein MW/PI (Da) | Species | Accession # | Protein Name                                                                       |
|------|-------|---------|-----|------------------|----------------|----------------------------|---------------------------------|----------------------------|-----------------------------|--------------------|---------|-------------|------------------------------------------------------------------------------------|
| 1    | 22.40 | 100.0   | 7   | 0/25             | K71k           | (R)EINFPAEYFPKPKITK(T)     | 2279.2475                       | 114.0463                   | 1.4                         | 17861.7/8.68       | HUMAN   | P68036      | Ubiquitin-conjugating enzyme E2 L3 OS=Homo sapiens GN=UBE2L3 PE=1 SV=1             |
| 1    | 22.40 | 100.0   | 7   | 0/25             | K67k           | (R)EINFPAEYFPKPKITFK(T)    | 2279.2475                       | 114.0463                   | 1.4                         | 17861.7/8.68       | HUMAN   | P68036      | Ubiquitin-conjugating enzyme E2 L3 OS=Homo sapiens GN=UBE2L3 PE=1 SV=1             |
| 2    | 16.09 | 75.2    | 6   | 4/25             | K64k           | (R)EINFPAEYFPKPKITFK(T)    | 2279.2475                       | 114.0463                   | 1.4                         | 17861.7/8.68       | HUMAN   | P68036      | Ubiquitin-conjugating enzyme E2 L3 OS=Homo sapiens GN=UBE2L3 PE=1 SV=1             |
| 3    | 10.62 | 65.7    | 2   | 9/25             | M2875m K2884k  | (K)EVMGKANAPYIKQIFPVTEK(E) | 2263.2155                       | 130.0783                   | 16.9                        | 470773.9/6.05      | HUMAN   | Q8TD57      | REVERSE Dynein heavy chain 3, axonemal OS=Homo sapiens GN=DNAH3 PE=2 SV=1          |
| 4    | 8.55  | 52.4    | 5   | 11/25            | M456m          | (R)TKnVCGDRIMKWLALNTR(S)   | 2377.2665                       | 16.0273                    | 13.5                        | 77401.1/9.11       | HUMAN   | R8BK979     | REVERSE Exonuclease domain-containing protein 1 OS=Homo sapiens GN=EXOD1 PE=2 SV=2 |

Detailed Results

| Rank                                                                                                                                                                                                                                                                                                                                                                                                                                                                                                                                                                                                                                                                                                                                                                                                                                                                                                                                                                                                                                                                                                                                                                                                                                                                                                                                                                                                                                                                                                                                                                                                                                                                                                                                                                                                                                                                                                                                                                                                                                                                                                                                                                                                                                                                                                                                                                                                                                                                                                                                                                                                                                                                                                                                                                                                                                                                                                                                                                                          | Score  | SPI (%) | BCS    | # Unmatched Ions | Variable sites | Sequence                | MH <sup>+</sup> Calculated (Da) | MH <sup>+</sup> Error (Da) | MH <sup>+</sup> Error (ppm) | Protein MW/PI (Da) | Species | Accession # | MS-Digest Index # | Protein Name                                                           |                    |         |                       |                       |         |                       |         |                       |                       |                       |         |         |         |         |         |         |         |                       |                       |         |                       |         |                       |                       |                       |         |                         |      |      |       |      |      |      |      |      |      |      |      |      |      |      |      |      |      |      |      |      |      |       |      |      |       |                       |      |      |       |      |      |      |      |       |       |       |       |       |       |       |       |       |       |       |       |       |       |       |       |       |        |       |      |      |      |      |      |      |      |      |      |      |      |      |      |      |      |      |      |      |      |      |      |      |      |      |      |          |    |    |    |   |   |     |   |       |    |    |       |    |    |    |    |     |                   |                  |      |                  |    |                   |                   |                   |    |           |       |      |       |      |       |       |       |       |       |       |       |       |       |       |       |       |       |      |      |      |      |      |      |       |       |  |  |  |    |  |  |  |  |  |  |    |  |  |  |    |  |  |  |  |  |  |  |  |  |  |  |
|-----------------------------------------------------------------------------------------------------------------------------------------------------------------------------------------------------------------------------------------------------------------------------------------------------------------------------------------------------------------------------------------------------------------------------------------------------------------------------------------------------------------------------------------------------------------------------------------------------------------------------------------------------------------------------------------------------------------------------------------------------------------------------------------------------------------------------------------------------------------------------------------------------------------------------------------------------------------------------------------------------------------------------------------------------------------------------------------------------------------------------------------------------------------------------------------------------------------------------------------------------------------------------------------------------------------------------------------------------------------------------------------------------------------------------------------------------------------------------------------------------------------------------------------------------------------------------------------------------------------------------------------------------------------------------------------------------------------------------------------------------------------------------------------------------------------------------------------------------------------------------------------------------------------------------------------------------------------------------------------------------------------------------------------------------------------------------------------------------------------------------------------------------------------------------------------------------------------------------------------------------------------------------------------------------------------------------------------------------------------------------------------------------------------------------------------------------------------------------------------------------------------------------------------------------------------------------------------------------------------------------------------------------------------------------------------------------------------------------------------------------------------------------------------------------------------------------------------------------------------------------------------------------------------------------------------------------------------------------------------------|--------|---------|--------|------------------|----------------|-------------------------|---------------------------------|----------------------------|-----------------------------|--------------------|---------|-------------|-------------------|------------------------------------------------------------------------|--------------------|---------|-----------------------|-----------------------|---------|-----------------------|---------|-----------------------|-----------------------|-----------------------|---------|---------|---------|---------|---------|---------|---------|-----------------------|-----------------------|---------|-----------------------|---------|-----------------------|-----------------------|-----------------------|---------|-------------------------|------|------|-------|------|------|------|------|------|------|------|------|------|------|------|------|------|------|------|------|------|------|-------|------|------|-------|-----------------------|------|------|-------|------|------|------|------|-------|-------|-------|-------|-------|-------|-------|-------|-------|-------|-------|-------|-------|-------|-------|-------|-------|--------|-------|------|------|------|------|------|------|------|------|------|------|------|------|------|------|------|------|------|------|------|------|------|------|------|------|------|----------|----|----|----|---|---|-----|---|-------|----|----|-------|----|----|----|----|-----|-------------------|------------------|------|------------------|----|-------------------|-------------------|-------------------|----|-----------|-------|------|-------|------|-------|-------|-------|-------|-------|-------|-------|-------|-------|-------|-------|-------|-------|------|------|------|------|------|------|-------|-------|--|--|--|----|--|--|--|--|--|--|----|--|--|--|----|--|--|--|--|--|--|--|--|--|--|--|
| 1                                                                                                                                                                                                                                                                                                                                                                                                                                                                                                                                                                                                                                                                                                                                                                                                                                                                                                                                                                                                                                                                                                                                                                                                                                                                                                                                                                                                                                                                                                                                                                                                                                                                                                                                                                                                                                                                                                                                                                                                                                                                                                                                                                                                                                                                                                                                                                                                                                                                                                                                                                                                                                                                                                                                                                                                                                                                                                                                                                                             | 22.40  | 100.0   | 7      | 0/25             | K71k           | (R)EINFPAEYFPKPKITFK(T) | 2279.2475                       | 114.0463                   | 1.4                         | 17861.7/8.68       | HUMAN   | P68036      | 812013            | Ubiquitin-conjugating enzyme E2 L3 OS=Homo sapiens GN=UBE2L3 PE=1 SV=1 |                    |         |                       |                       |         |                       |         |                       |                       |                       |         |         |         |         |         |         |         |                       |                       |         |                       |         |                       |                       |                       |         |                         |      |      |       |      |      |      |      |      |      |      |      |      |      |      |      |      |      |      |      |      |      |       |      |      |       |                       |      |      |       |      |      |      |      |       |       |       |       |       |       |       |       |       |       |       |       |       |       |       |       |       |        |       |      |      |      |      |      |      |      |      |      |      |      |      |      |      |      |      |      |      |      |      |      |      |      |      |      |          |    |    |    |   |   |     |   |       |    |    |       |    |    |    |    |     |                   |                  |      |                  |    |                   |                   |                   |    |           |       |      |       |      |       |       |       |       |       |       |       |       |       |       |       |       |       |      |      |      |      |      |      |       |       |  |  |  |    |  |  |  |  |  |  |    |  |  |  |    |  |  |  |  |  |  |  |  |  |  |  |
| <table border="1"> <thead> <tr> <th>Fragment-ion (m/z)</th> <th>70.064</th> <th>84.080</th> <th>86.095</th> <th>102.054</th> <th>120.079</th> <th>129.100</th> <th>136.073</th> <th>141.099</th> <th>169.095</th> <th>215.136</th> <th>217.130</th> <th>228.132</th> <th>243.132</th> <th>245.127</th> <th>276.168</th> <th>373.218</th> <th>439.595<sup>+3</sup></th> <th>472.780<sup>+2</sup></th> <th>504.246</th> <th>536.828<sup>+2</sup></th> <th>617.326</th> <th>658.886<sup>+2</sup></th> <th>740.412<sup>+2</sup></th> <th>804.933<sup>+2</sup></th> <th>944.546</th> </tr> </thead> <tbody> <tr> <td>Frac. Inten. (% of TIC)</td> <td>0.02</td> <td>0.17</td> <td>10.46</td> <td>0.11</td> <td>0.20</td> <td>0.37</td> <td>0.55</td> <td>3.16</td> <td>3.45</td> <td>3.44</td> <td>4.81</td> <td>2.77</td> <td>3.78</td> <td>3.38</td> <td>2.79</td> <td>3.57</td> <td>7.00</td> <td>4.76</td> <td>3.17</td> <td>3.82</td> <td>5.48</td> <td>12.54</td> <td>3.78</td> <td>2.74</td> <td>13.70</td> </tr> <tr> <td>Rel. Inten. (% of BP)</td> <td>0.17</td> <td>1.26</td> <td>76.36</td> <td>0.84</td> <td>1.46</td> <td>2.69</td> <td>3.99</td> <td>23.05</td> <td>25.17</td> <td>25.13</td> <td>35.09</td> <td>20.21</td> <td>27.56</td> <td>24.70</td> <td>20.35</td> <td>26.05</td> <td>51.12</td> <td>34.74</td> <td>23.13</td> <td>27.85</td> <td>39.99</td> <td>91.51</td> <td>27.59</td> <td>19.98</td> <td>100.00</td> </tr> <tr> <td>Score</td> <td>0.20</td> <td>0.50</td> <td>0.50</td> <td>1.00</td> <td>1.00</td> <td>0.20</td> <td>1.00</td> <td>0.50</td> <td>0.75</td> <td>0.75</td> <td>0.50</td> <td>0.75</td> <td>0.75</td> <td>0.75</td> <td>0.75</td> <td>0.75</td> <td>1.50</td> <td>1.50</td> <td>0.75</td> <td>1.50</td> <td>0.50</td> <td>1.50</td> <td>1.50</td> <td>1.50</td> <td>1.50</td> </tr> <tr> <td>Ion-type</td> <td>PR</td> <td>KQ</td> <td>a1</td> <td>E</td> <td>F</td> <td>RKQ</td> <td>Y</td> <td>PA-28</td> <td>PA</td> <td>a2</td> <td>PF-28</td> <td>IN</td> <td>b2</td> <td>PF</td> <td>FK</td> <td>FKP</td> <td>y10<sup>+3</sup></td> <td>y7<sup>+2</sup></td> <td>EINF</td> <td>y8<sup>+2</sup></td> <td>b5</td> <td>y10<sup>+2</sup></td> <td>y11<sup>+2</sup></td> <td>y12<sup>+2</sup></td> <td>y7</td> </tr> <tr> <td>Delta ppm</td> <td>-17.5</td> <td>-9.2</td> <td>-30.5</td> <td>0.50</td> <td>-11.3</td> <td>-15.6</td> <td>-14.2</td> <td>-17.6</td> <td>-27.9</td> <td>-21.6</td> <td>-19.6</td> <td>-20.9</td> <td>-12.6</td> <td>-12.5</td> <td>-11.2</td> <td>-13.2</td> <td>-17.5</td> <td>-0.9</td> <td>-3.7</td> <td>-1.3</td> <td>-3.0</td> <td>-7.0</td> <td>-6.4</td> <td>-12.8</td> <td>-10.9</td> </tr> <tr> <td></td> <td></td> <td></td> <td>LI</td> <td></td> <td></td> <td></td> <td></td> <td></td> <td></td> <td>IT</td> <td></td> <td></td> <td></td> <td>EI</td> <td></td> </tr> </tbody> </table> |        |         |        |                  |                |                         |                                 |                            |                             |                    |         |             |                   |                                                                        | Fragment-ion (m/z) | 70.064  | 84.080                | 86.095                | 102.054 | 120.079               | 129.100 | 136.073               | 141.099               | 169.095               | 215.136 | 217.130 | 228.132 | 243.132 | 245.127 | 276.168 | 373.218 | 439.595 <sup>+3</sup> | 472.780 <sup>+2</sup> | 504.246 | 536.828 <sup>+2</sup> | 617.326 | 658.886 <sup>+2</sup> | 740.412 <sup>+2</sup> | 804.933 <sup>+2</sup> | 944.546 | Frac. Inten. (% of TIC) | 0.02 | 0.17 | 10.46 | 0.11 | 0.20 | 0.37 | 0.55 | 3.16 | 3.45 | 3.44 | 4.81 | 2.77 | 3.78 | 3.38 | 2.79 | 3.57 | 7.00 | 4.76 | 3.17 | 3.82 | 5.48 | 12.54 | 3.78 | 2.74 | 13.70 | Rel. Inten. (% of BP) | 0.17 | 1.26 | 76.36 | 0.84 | 1.46 | 2.69 | 3.99 | 23.05 | 25.17 | 25.13 | 35.09 | 20.21 | 27.56 | 24.70 | 20.35 | 26.05 | 51.12 | 34.74 | 23.13 | 27.85 | 39.99 | 91.51 | 27.59 | 19.98 | 100.00 | Score | 0.20 | 0.50 | 0.50 | 1.00 | 1.00 | 0.20 | 1.00 | 0.50 | 0.75 | 0.75 | 0.50 | 0.75 | 0.75 | 0.75 | 0.75 | 0.75 | 1.50 | 1.50 | 0.75 | 1.50 | 0.50 | 1.50 | 1.50 | 1.50 | 1.50 | Ion-type | PR | KQ | a1 | E | F | RKQ | Y | PA-28 | PA | a2 | PF-28 | IN | b2 | PF | FK | FKP | y10 <sup>+3</sup> | y7 <sup>+2</sup> | EINF | y8 <sup>+2</sup> | b5 | y10 <sup>+2</sup> | y11 <sup>+2</sup> | y12 <sup>+2</sup> | y7 | Delta ppm | -17.5 | -9.2 | -30.5 | 0.50 | -11.3 | -15.6 | -14.2 | -17.6 | -27.9 | -21.6 | -19.6 | -20.9 | -12.6 | -12.5 | -11.2 | -13.2 | -17.5 | -0.9 | -3.7 | -1.3 | -3.0 | -7.0 | -6.4 | -12.8 | -10.9 |  |  |  | LI |  |  |  |  |  |  | IT |  |  |  | EI |  |  |  |  |  |  |  |  |  |  |  |
| Fragment-ion (m/z)                                                                                                                                                                                                                                                                                                                                                                                                                                                                                                                                                                                                                                                                                                                                                                                                                                                                                                                                                                                                                                                                                                                                                                                                                                                                                                                                                                                                                                                                                                                                                                                                                                                                                                                                                                                                                                                                                                                                                                                                                                                                                                                                                                                                                                                                                                                                                                                                                                                                                                                                                                                                                                                                                                                                                                                                                                                                                                                                                                            | 70.064 | 84.080  | 86.095 | 102.054          | 120.079        | 129.100                 | 136.073                         | 141.099                    | 169.095                     | 215.136            | 217.130 | 228.132     | 243.132           | 245.127                                                                | 276.168            | 373.218 | 439.595 <sup>+3</sup> | 472.780 <sup>+2</sup> | 504.246 | 536.828 <sup>+2</sup> | 617.326 | 658.886 <sup>+2</sup> | 740.412 <sup>+2</sup> | 804.933 <sup>+2</sup> | 944.546 |         |         |         |         |         |         |                       |                       |         |                       |         |                       |                       |                       |         |                         |      |      |       |      |      |      |      |      |      |      |      |      |      |      |      |      |      |      |      |      |      |       |      |      |       |                       |      |      |       |      |      |      |      |       |       |       |       |       |       |       |       |       |       |       |       |       |       |       |       |       |        |       |      |      |      |      |      |      |      |      |      |      |      |      |      |      |      |      |      |      |      |      |      |      |      |      |      |          |    |    |    |   |   |     |   |       |    |    |       |    |    |    |    |     |                   |                  |      |                  |    |                   |                   |                   |    |           |       |      |       |      |       |       |       |       |       |       |       |       |       |       |       |       |       |      |      |      |      |      |      |       |       |  |  |  |    |  |  |  |  |  |  |    |  |  |  |    |  |  |  |  |  |  |  |  |  |  |  |
| Frac. Inten. (% of TIC)                                                                                                                                                                                                                                                                                                                                                                                                                                                                                                                                                                                                                                                                                                                                                                                                                                                                                                                                                                                                                                                                                                                                                                                                                                                                                                                                                                                                                                                                                                                                                                                                                                                                                                                                                                                                                                                                                                                                                                                                                                                                                                                                                                                                                                                                                                                                                                                                                                                                                                                                                                                                                                                                                                                                                                                                                                                                                                                                                                       | 0.02   | 0.17    | 10.46  | 0.11             | 0.20           | 0.37                    | 0.55                            | 3.16                       | 3.45                        | 3.44               | 4.81    | 2.77        | 3.78              | 3.38                                                                   | 2.79               | 3.57    | 7.00                  | 4.76                  | 3.17    | 3.82                  | 5.48    | 12.54                 | 3.78                  | 2.74                  | 13.70   |         |         |         |         |         |         |                       |                       |         |                       |         |                       |                       |                       |         |                         |      |      |       |      |      |      |      |      |      |      |      |      |      |      |      |      |      |      |      |      |      |       |      |      |       |                       |      |      |       |      |      |      |      |       |       |       |       |       |       |       |       |       |       |       |       |       |       |       |       |       |        |       |      |      |      |      |      |      |      |      |      |      |      |      |      |      |      |      |      |      |      |      |      |      |      |      |      |          |    |    |    |   |   |     |   |       |    |    |       |    |    |    |    |     |                   |                  |      |                  |    |                   |                   |                   |    |           |       |      |       |      |       |       |       |       |       |       |       |       |       |       |       |       |       |      |      |      |      |      |      |       |       |  |  |  |    |  |  |  |  |  |  |    |  |  |  |    |  |  |  |  |  |  |  |  |  |  |  |
| Rel. Inten. (% of BP)                                                                                                                                                                                                                                                                                                                                                                                                                                                                                                                                                                                                                                                                                                                                                                                                                                                                                                                                                                                                                                                                                                                                                                                                                                                                                                                                                                                                                                                                                                                                                                                                                                                                                                                                                                                                                                                                                                                                                                                                                                                                                                                                                                                                                                                                                                                                                                                                                                                                                                                                                                                                                                                                                                                                                                                                                                                                                                                                                                         | 0.17   | 1.26    | 76.36  | 0.84             | 1.46           | 2.69                    | 3.99                            | 23.05                      | 25.17                       | 25.13              | 35.09   | 20.21       | 27.56             | 24.70                                                                  | 20.35              | 26.05   | 51.12                 | 34.74                 | 23.13   | 27.85                 | 39.99   | 91.51                 | 27.59                 | 19.98                 | 100.00  |         |         |         |         |         |         |                       |                       |         |                       |         |                       |                       |                       |         |                         |      |      |       |      |      |      |      |      |      |      |      |      |      |      |      |      |      |      |      |      |      |       |      |      |       |                       |      |      |       |      |      |      |      |       |       |       |       |       |       |       |       |       |       |       |       |       |       |       |       |       |        |       |      |      |      |      |      |      |      |      |      |      |      |      |      |      |      |      |      |      |      |      |      |      |      |      |      |          |    |    |    |   |   |     |   |       |    |    |       |    |    |    |    |     |                   |                  |      |                  |    |                   |                   |                   |    |           |       |      |       |      |       |       |       |       |       |       |       |       |       |       |       |       |       |      |      |      |      |      |      |       |       |  |  |  |    |  |  |  |  |  |  |    |  |  |  |    |  |  |  |  |  |  |  |  |  |  |  |
| Score                                                                                                                                                                                                                                                                                                                                                                                                                                                                                                                                                                                                                                                                                                                                                                                                                                                                                                                                                                                                                                                                                                                                                                                                                                                                                                                                                                                                                                                                                                                                                                                                                                                                                                                                                                                                                                                                                                                                                                                                                                                                                                                                                                                                                                                                                                                                                                                                                                                                                                                                                                                                                                                                                                                                                                                                                                                                                                                                                                                         | 0.20   | 0.50    | 0.50   | 1.00             | 1.00           | 0.20                    | 1.00                            | 0.50                       | 0.75                        | 0.75               | 0.50    | 0.75        | 0.75              | 0.75                                                                   | 0.75               | 0.75    | 1.50                  | 1.50                  | 0.75    | 1.50                  | 0.50    | 1.50                  | 1.50                  | 1.50                  | 1.50    |         |         |         |         |         |         |                       |                       |         |                       |         |                       |                       |                       |         |                         |      |      |       |      |      |      |      |      |      |      |      |      |      |      |      |      |      |      |      |      |      |       |      |      |       |                       |      |      |       |      |      |      |      |       |       |       |       |       |       |       |       |       |       |       |       |       |       |       |       |       |        |       |      |      |      |      |      |      |      |      |      |      |      |      |      |      |      |      |      |      |      |      |      |      |      |      |      |          |    |    |    |   |   |     |   |       |    |    |       |    |    |    |    |     |                   |                  |      |                  |    |                   |                   |                   |    |           |       |      |       |      |       |       |       |       |       |       |       |       |       |       |       |       |       |      |      |      |      |      |      |       |       |  |  |  |    |  |  |  |  |  |  |    |  |  |  |    |  |  |  |  |  |  |  |  |  |  |  |
| Ion-type                                                                                                                                                                                                                                                                                                                                                                                                                                                                                                                                                                                                                                                                                                                                                                                                                                                                                                                                                                                                                                                                                                                                                                                                                                                                                                                                                                                                                                                                                                                                                                                                                                                                                                                                                                                                                                                                                                                                                                                                                                                                                                                                                                                                                                                                                                                                                                                                                                                                                                                                                                                                                                                                                                                                                                                                                                                                                                                                                                                      | PR     | KQ      | a1     | E                | F              | RKQ                     | Y                               | PA-28                      | PA                          | a2                 | PF-28   | IN          | b2                | PF                                                                     | FK                 | FKP     | y10 <sup>+3</sup>     | y7 <sup>+2</sup>      | EINF    | y8 <sup>+2</sup>      | b5      | y10 <sup>+2</sup>     | y11 <sup>+2</sup>     | y12 <sup>+2</sup>     | y7      |         |         |         |         |         |         |                       |                       |         |                       |         |                       |                       |                       |         |                         |      |      |       |      |      |      |      |      |      |      |      |      |      |      |      |      |      |      |      |      |      |       |      |      |       |                       |      |      |       |      |      |      |      |       |       |       |       |       |       |       |       |       |       |       |       |       |       |       |       |       |        |       |      |      |      |      |      |      |      |      |      |      |      |      |      |      |      |      |      |      |      |      |      |      |      |      |      |          |    |    |    |   |   |     |   |       |    |    |       |    |    |    |    |     |                   |                  |      |                  |    |                   |                   |                   |    |           |       |      |       |      |       |       |       |       |       |       |       |       |       |       |       |       |       |      |      |      |      |      |      |       |       |  |  |  |    |  |  |  |  |  |  |    |  |  |  |    |  |  |  |  |  |  |  |  |  |  |  |
| Delta ppm                                                                                                                                                                                                                                                                                                                                                                                                                                                                                                                                                                                                                                                                                                                                                                                                                                                                                                                                                                                                                                                                                                                                                                                                                                                                                                                                                                                                                                                                                                                                                                                                                                                                                                                                                                                                                                                                                                                                                                                                                                                                                                                                                                                                                                                                                                                                                                                                                                                                                                                                                                                                                                                                                                                                                                                                                                                                                                                                                                                     | -17.5  | -9.2    | -30.5  | 0.50             | -11.3          | -15.6                   | -14.2                           | -17.6                      | -27.9                       | -21.6              | -19.6   | -20.9       | -12.6             | -12.5                                                                  | -11.2              | -13.2   | -17.5                 | -0.9                  | -3.7    | -1.3                  | -3.0    | -7.0                  | -6.4                  | -12.8                 | -10.9   |         |         |         |         |         |         |                       |                       |         |                       |         |                       |                       |                       |         |                         |      |      |       |      |      |      |      |      |      |      |      |      |      |      |      |      |      |      |      |      |      |       |      |      |       |                       |      |      |       |      |      |      |      |       |       |       |       |       |       |       |       |       |       |       |       |       |       |       |       |       |        |       |      |      |      |      |      |      |      |      |      |      |      |      |      |      |      |      |      |      |      |      |      |      |      |      |      |          |    |    |    |   |   |     |   |       |    |    |       |    |    |    |    |     |                   |                  |      |                  |    |                   |                   |                   |    |           |       |      |       |      |       |       |       |       |       |       |       |       |       |       |       |       |       |      |      |      |      |      |      |       |       |  |  |  |    |  |  |  |  |  |  |    |  |  |  |    |  |  |  |  |  |  |  |  |  |  |  |
|                                                                                                                                                                                                                                                                                                                                                                                                                                                                                                                                                                                                                                                                                                                                                                                                                                                                                                                                                                                                                                                                                                                                                                                                                                                                                                                                                                                                                                                                                                                                                                                                                                                                                                                                                                                                                                                                                                                                                                                                                                                                                                                                                                                                                                                                                                                                                                                                                                                                                                                                                                                                                                                                                                                                                                                                                                                                                                                                                                                               |        |         | LI     |                  |                |                         |                                 |                            |                             | IT                 |         |             |                   | EI                                                                     |                    |         |                       |                       |         |                       |         |                       |                       |                       |         |         |         |         |         |         |         |                       |                       |         |                       |         |                       |                       |                       |         |                         |      |      |       |      |      |      |      |      |      |      |      |      |      |      |      |      |      |      |      |      |      |       |      |      |       |                       |      |      |       |      |      |      |      |       |       |       |       |       |       |       |       |       |       |       |       |       |       |       |       |       |        |       |      |      |      |      |      |      |      |      |      |      |      |      |      |      |      |      |      |      |      |      |      |      |      |      |      |          |    |    |    |   |   |     |   |       |    |    |       |    |    |    |    |     |                   |                  |      |                  |    |                   |                   |                   |    |           |       |      |       |      |       |       |       |       |       |       |       |       |       |       |       |       |       |      |      |      |      |      |      |       |       |  |  |  |    |  |  |  |  |  |  |    |  |  |  |    |  |  |  |  |  |  |  |  |  |  |  |

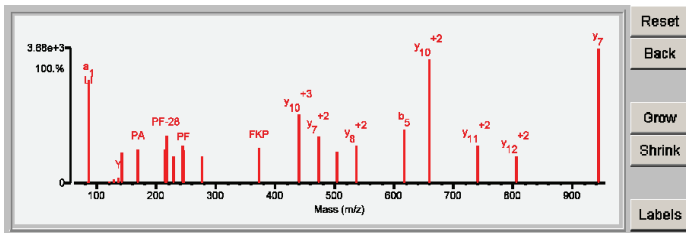

| Rank                                                                                                                                                                                                                                                                                                                                                                                                                                                                                                                                                                                                                                                                                                                                                                                                                                                                                                                                                                                                                                                                                                                                                                                                                                                                                                                                                                                                                                                                                                                                                                                                                                                                                                                                                                                                                                                                                                                                                                                                                                                                                                                                                                                                                                                                                                                                                                                                                                                                                                                                                                                                                                                                                                                                                                                                                                                                                                                                                                                          | Score  | SPI (%) | BCS    | # Unmatched Ions | Variable sites | Sequence                | MH <sup>+</sup> Calculated (Da) | MH <sup>+</sup> Error (Da) | MH <sup>+</sup> Error (ppm) | Protein MW/PI (Da) | Species | Accession # | MS-Digest Index # | Protein Name                                                           |                    |         |                       |                       |         |                       |         |                       |                       |                       |         |         |         |         |         |         |         |                       |                       |         |                       |         |                       |                       |                       |         |                         |      |      |       |      |      |      |      |      |      |      |      |      |      |      |      |      |      |      |      |      |      |       |      |      |       |                       |      |      |       |      |      |      |      |       |       |       |       |       |       |       |       |       |       |       |       |       |       |       |       |       |        |       |      |      |      |      |      |      |      |      |      |      |      |      |      |      |      |      |      |      |      |      |      |      |      |      |      |          |    |    |    |   |   |     |   |       |    |    |       |    |    |    |    |     |                   |                  |      |                  |    |                   |                   |                   |    |           |       |      |       |      |       |       |       |       |       |       |       |       |       |       |       |       |       |      |      |      |      |      |      |       |       |  |  |  |    |  |  |  |  |  |  |    |  |  |  |    |  |  |  |  |  |  |  |  |  |  |  |
|-----------------------------------------------------------------------------------------------------------------------------------------------------------------------------------------------------------------------------------------------------------------------------------------------------------------------------------------------------------------------------------------------------------------------------------------------------------------------------------------------------------------------------------------------------------------------------------------------------------------------------------------------------------------------------------------------------------------------------------------------------------------------------------------------------------------------------------------------------------------------------------------------------------------------------------------------------------------------------------------------------------------------------------------------------------------------------------------------------------------------------------------------------------------------------------------------------------------------------------------------------------------------------------------------------------------------------------------------------------------------------------------------------------------------------------------------------------------------------------------------------------------------------------------------------------------------------------------------------------------------------------------------------------------------------------------------------------------------------------------------------------------------------------------------------------------------------------------------------------------------------------------------------------------------------------------------------------------------------------------------------------------------------------------------------------------------------------------------------------------------------------------------------------------------------------------------------------------------------------------------------------------------------------------------------------------------------------------------------------------------------------------------------------------------------------------------------------------------------------------------------------------------------------------------------------------------------------------------------------------------------------------------------------------------------------------------------------------------------------------------------------------------------------------------------------------------------------------------------------------------------------------------------------------------------------------------------------------------------------------------|--------|---------|--------|------------------|----------------|-------------------------|---------------------------------|----------------------------|-----------------------------|--------------------|---------|-------------|-------------------|------------------------------------------------------------------------|--------------------|---------|-----------------------|-----------------------|---------|-----------------------|---------|-----------------------|-----------------------|-----------------------|---------|---------|---------|---------|---------|---------|---------|-----------------------|-----------------------|---------|-----------------------|---------|-----------------------|-----------------------|-----------------------|---------|-------------------------|------|------|-------|------|------|------|------|------|------|------|------|------|------|------|------|------|------|------|------|------|------|-------|------|------|-------|-----------------------|------|------|-------|------|------|------|------|-------|-------|-------|-------|-------|-------|-------|-------|-------|-------|-------|-------|-------|-------|-------|-------|-------|--------|-------|------|------|------|------|------|------|------|------|------|------|------|------|------|------|------|------|------|------|------|------|------|------|------|------|------|----------|----|----|----|---|---|-----|---|-------|----|----|-------|----|----|----|----|-----|-------------------|------------------|------|------------------|----|-------------------|-------------------|-------------------|----|-----------|-------|------|-------|------|-------|-------|-------|-------|-------|-------|-------|-------|-------|-------|-------|-------|-------|------|------|------|------|------|------|-------|-------|--|--|--|----|--|--|--|--|--|--|----|--|--|--|----|--|--|--|--|--|--|--|--|--|--|--|
| 1                                                                                                                                                                                                                                                                                                                                                                                                                                                                                                                                                                                                                                                                                                                                                                                                                                                                                                                                                                                                                                                                                                                                                                                                                                                                                                                                                                                                                                                                                                                                                                                                                                                                                                                                                                                                                                                                                                                                                                                                                                                                                                                                                                                                                                                                                                                                                                                                                                                                                                                                                                                                                                                                                                                                                                                                                                                                                                                                                                                             | 22.40  | 100.0   | 7      | 0/25             | K67k           | (R)EINFPAEYFPKPKITFK(T) | 2279.2475                       | 114.0463                   | 1.4                         | 17861.7/8.68       | HUMAN   | P68036      | 812013            | Ubiquitin-conjugating enzyme E2 L3 OS=Homo sapiens GN=UBE2L3 PE=1 SV=1 |                    |         |                       |                       |         |                       |         |                       |                       |                       |         |         |         |         |         |         |         |                       |                       |         |                       |         |                       |                       |                       |         |                         |      |      |       |      |      |      |      |      |      |      |      |      |      |      |      |      |      |      |      |      |      |       |      |      |       |                       |      |      |       |      |      |      |      |       |       |       |       |       |       |       |       |       |       |       |       |       |       |       |       |       |        |       |      |      |      |      |      |      |      |      |      |      |      |      |      |      |      |      |      |      |      |      |      |      |      |      |      |          |    |    |    |   |   |     |   |       |    |    |       |    |    |    |    |     |                   |                  |      |                  |    |                   |                   |                   |    |           |       |      |       |      |       |       |       |       |       |       |       |       |       |       |       |       |       |      |      |      |      |      |      |       |       |  |  |  |    |  |  |  |  |  |  |    |  |  |  |    |  |  |  |  |  |  |  |  |  |  |  |
| <table border="1"> <thead> <tr> <th>Fragment-ion (m/z)</th> <th>70.064</th> <th>84.080</th> <th>86.095</th> <th>102.054</th> <th>120.079</th> <th>129.100</th> <th>136.073</th> <th>141.099</th> <th>169.095</th> <th>215.136</th> <th>217.130</th> <th>228.132</th> <th>243.132</th> <th>245.127</th> <th>276.168</th> <th>373.218</th> <th>439.595<sup>+3</sup></th> <th>472.780<sup>+2</sup></th> <th>504.246</th> <th>536.828<sup>+2</sup></th> <th>617.326</th> <th>658.886<sup>+2</sup></th> <th>740.412<sup>+2</sup></th> <th>804.933<sup>+2</sup></th> <th>944.546</th> </tr> </thead> <tbody> <tr> <td>Frac. Inten. (% of TIC)</td> <td>0.02</td> <td>0.17</td> <td>10.46</td> <td>0.11</td> <td>0.20</td> <td>0.37</td> <td>0.55</td> <td>3.16</td> <td>3.45</td> <td>3.44</td> <td>4.81</td> <td>2.77</td> <td>3.78</td> <td>3.38</td> <td>2.79</td> <td>3.57</td> <td>7.00</td> <td>4.76</td> <td>3.17</td> <td>3.82</td> <td>5.48</td> <td>12.54</td> <td>3.78</td> <td>2.74</td> <td>13.70</td> </tr> <tr> <td>Rel. Inten. (% of BP)</td> <td>0.17</td> <td>1.26</td> <td>76.36</td> <td>0.84</td> <td>1.46</td> <td>2.69</td> <td>3.99</td> <td>23.05</td> <td>25.17</td> <td>25.13</td> <td>35.09</td> <td>20.21</td> <td>27.56</td> <td>24.70</td> <td>20.35</td> <td>26.05</td> <td>51.12</td> <td>34.74</td> <td>23.13</td> <td>27.85</td> <td>39.99</td> <td>91.51</td> <td>27.59</td> <td>19.98</td> <td>100.00</td> </tr> <tr> <td>Score</td> <td>0.20</td> <td>0.50</td> <td>0.50</td> <td>1.00</td> <td>1.00</td> <td>0.20</td> <td>1.00</td> <td>0.50</td> <td>0.75</td> <td>0.75</td> <td>0.50</td> <td>0.75</td> <td>0.75</td> <td>0.75</td> <td>0.75</td> <td>0.75</td> <td>1.50</td> <td>1.50</td> <td>0.75</td> <td>1.50</td> <td>0.50</td> <td>1.50</td> <td>1.50</td> <td>1.50</td> <td>1.50</td> </tr> <tr> <td>Ion-type</td> <td>PR</td> <td>KQ</td> <td>a1</td> <td>E</td> <td>F</td> <td>RKQ</td> <td>Y</td> <td>PA-28</td> <td>PA</td> <td>a2</td> <td>PF-28</td> <td>IN</td> <td>b2</td> <td>PF</td> <td>FK</td> <td>FKP</td> <td>y10<sup>+3</sup></td> <td>y7<sup>+2</sup></td> <td>EINF</td> <td>y8<sup>+2</sup></td> <td>b5</td> <td>y10<sup>+2</sup></td> <td>y11<sup>+2</sup></td> <td>y12<sup>+2</sup></td> <td>y7</td> </tr> <tr> <td>Delta ppm</td> <td>-17.5</td> <td>-9.2</td> <td>-30.5</td> <td>0.50</td> <td>-11.3</td> <td>-15.6</td> <td>-14.2</td> <td>-17.6</td> <td>-27.9</td> <td>-21.6</td> <td>-19.6</td> <td>-20.9</td> <td>-12.6</td> <td>-12.5</td> <td>-11.2</td> <td>-13.2</td> <td>-17.5</td> <td>-0.9</td> <td>-3.7</td> <td>-1.3</td> <td>-3.0</td> <td>-7.0</td> <td>-6.4</td> <td>-12.8</td> <td>-10.9</td> </tr> <tr> <td></td> <td></td> <td></td> <td>LI</td> <td></td> <td></td> <td></td> <td></td> <td></td> <td></td> <td>IT</td> <td></td> <td></td> <td></td> <td>EI</td> <td></td> </tr> </tbody> </table> |        |         |        |                  |                |                         |                                 |                            |                             |                    |         |             |                   |                                                                        | Fragment-ion (m/z) | 70.064  | 84.080                | 86.095                | 102.054 | 120.079               | 129.100 | 136.073               | 141.099               | 169.095               | 215.136 | 217.130 | 228.132 | 243.132 | 245.127 | 276.168 | 373.218 | 439.595 <sup>+3</sup> | 472.780 <sup>+2</sup> | 504.246 | 536.828 <sup>+2</sup> | 617.326 | 658.886 <sup>+2</sup> | 740.412 <sup>+2</sup> | 804.933 <sup>+2</sup> | 944.546 | Frac. Inten. (% of TIC) | 0.02 | 0.17 | 10.46 | 0.11 | 0.20 | 0.37 | 0.55 | 3.16 | 3.45 | 3.44 | 4.81 | 2.77 | 3.78 | 3.38 | 2.79 | 3.57 | 7.00 | 4.76 | 3.17 | 3.82 | 5.48 | 12.54 | 3.78 | 2.74 | 13.70 | Rel. Inten. (% of BP) | 0.17 | 1.26 | 76.36 | 0.84 | 1.46 | 2.69 | 3.99 | 23.05 | 25.17 | 25.13 | 35.09 | 20.21 | 27.56 | 24.70 | 20.35 | 26.05 | 51.12 | 34.74 | 23.13 | 27.85 | 39.99 | 91.51 | 27.59 | 19.98 | 100.00 | Score | 0.20 | 0.50 | 0.50 | 1.00 | 1.00 | 0.20 | 1.00 | 0.50 | 0.75 | 0.75 | 0.50 | 0.75 | 0.75 | 0.75 | 0.75 | 0.75 | 1.50 | 1.50 | 0.75 | 1.50 | 0.50 | 1.50 | 1.50 | 1.50 | 1.50 | Ion-type | PR | KQ | a1 | E | F | RKQ | Y | PA-28 | PA | a2 | PF-28 | IN | b2 | PF | FK | FKP | y10 <sup>+3</sup> | y7 <sup>+2</sup> | EINF | y8 <sup>+2</sup> | b5 | y10 <sup>+2</sup> | y11 <sup>+2</sup> | y12 <sup>+2</sup> | y7 | Delta ppm | -17.5 | -9.2 | -30.5 | 0.50 | -11.3 | -15.6 | -14.2 | -17.6 | -27.9 | -21.6 | -19.6 | -20.9 | -12.6 | -12.5 | -11.2 | -13.2 | -17.5 | -0.9 | -3.7 | -1.3 | -3.0 | -7.0 | -6.4 | -12.8 | -10.9 |  |  |  | LI |  |  |  |  |  |  | IT |  |  |  | EI |  |  |  |  |  |  |  |  |  |  |  |
| Fragment-ion (m/z)                                                                                                                                                                                                                                                                                                                                                                                                                                                                                                                                                                                                                                                                                                                                                                                                                                                                                                                                                                                                                                                                                                                                                                                                                                                                                                                                                                                                                                                                                                                                                                                                                                                                                                                                                                                                                                                                                                                                                                                                                                                                                                                                                                                                                                                                                                                                                                                                                                                                                                                                                                                                                                                                                                                                                                                                                                                                                                                                                                            | 70.064 | 84.080  | 86.095 | 102.054          | 120.079        | 129.100                 | 136.073                         | 141.099                    | 169.095                     | 215.136            | 217.130 | 228.132     | 243.132           | 245.127                                                                | 276.168            | 373.218 | 439.595 <sup>+3</sup> | 472.780 <sup>+2</sup> | 504.246 | 536.828 <sup>+2</sup> | 617.326 | 658.886 <sup>+2</sup> | 740.412 <sup>+2</sup> | 804.933 <sup>+2</sup> | 944.546 |         |         |         |         |         |         |                       |                       |         |                       |         |                       |                       |                       |         |                         |      |      |       |      |      |      |      |      |      |      |      |      |      |      |      |      |      |      |      |      |      |       |      |      |       |                       |      |      |       |      |      |      |      |       |       |       |       |       |       |       |       |       |       |       |       |       |       |       |       |       |        |       |      |      |      |      |      |      |      |      |      |      |      |      |      |      |      |      |      |      |      |      |      |      |      |      |      |          |    |    |    |   |   |     |   |       |    |    |       |    |    |    |    |     |                   |                  |      |                  |    |                   |                   |                   |    |           |       |      |       |      |       |       |       |       |       |       |       |       |       |       |       |       |       |      |      |      |      |      |      |       |       |  |  |  |    |  |  |  |  |  |  |    |  |  |  |    |  |  |  |  |  |  |  |  |  |  |  |
| Frac. Inten. (% of TIC)                                                                                                                                                                                                                                                                                                                                                                                                                                                                                                                                                                                                                                                                                                                                                                                                                                                                                                                                                                                                                                                                                                                                                                                                                                                                                                                                                                                                                                                                                                                                                                                                                                                                                                                                                                                                                                                                                                                                                                                                                                                                                                                                                                                                                                                                                                                                                                                                                                                                                                                                                                                                                                                                                                                                                                                                                                                                                                                                                                       | 0.02   | 0.17    | 10.46  | 0.11             | 0.20           | 0.37                    | 0.55                            | 3.16                       | 3.45                        | 3.44               | 4.81    | 2.77        | 3.78              | 3.38                                                                   | 2.79               | 3.57    | 7.00                  | 4.76                  | 3.17    | 3.82                  | 5.48    | 12.54                 | 3.78                  | 2.74                  | 13.70   |         |         |         |         |         |         |                       |                       |         |                       |         |                       |                       |                       |         |                         |      |      |       |      |      |      |      |      |      |      |      |      |      |      |      |      |      |      |      |      |      |       |      |      |       |                       |      |      |       |      |      |      |      |       |       |       |       |       |       |       |       |       |       |       |       |       |       |       |       |       |        |       |      |      |      |      |      |      |      |      |      |      |      |      |      |      |      |      |      |      |      |      |      |      |      |      |      |          |    |    |    |   |   |     |   |       |    |    |       |    |    |    |    |     |                   |                  |      |                  |    |                   |                   |                   |    |           |       |      |       |      |       |       |       |       |       |       |       |       |       |       |       |       |       |      |      |      |      |      |      |       |       |  |  |  |    |  |  |  |  |  |  |    |  |  |  |    |  |  |  |  |  |  |  |  |  |  |  |
| Rel. Inten. (% of BP)                                                                                                                                                                                                                                                                                                                                                                                                                                                                                                                                                                                                                                                                                                                                                                                                                                                                                                                                                                                                                                                                                                                                                                                                                                                                                                                                                                                                                                                                                                                                                                                                                                                                                                                                                                                                                                                                                                                                                                                                                                                                                                                                                                                                                                                                                                                                                                                                                                                                                                                                                                                                                                                                                                                                                                                                                                                                                                                                                                         | 0.17   | 1.26    | 76.36  | 0.84             | 1.46           | 2.69                    | 3.99                            | 23.05                      | 25.17                       | 25.13              | 35.09   | 20.21       | 27.56             | 24.70                                                                  | 20.35              | 26.05   | 51.12                 | 34.74                 | 23.13   | 27.85                 | 39.99   | 91.51                 | 27.59                 | 19.98                 | 100.00  |         |         |         |         |         |         |                       |                       |         |                       |         |                       |                       |                       |         |                         |      |      |       |      |      |      |      |      |      |      |      |      |      |      |      |      |      |      |      |      |      |       |      |      |       |                       |      |      |       |      |      |      |      |       |       |       |       |       |       |       |       |       |       |       |       |       |       |       |       |       |        |       |      |      |      |      |      |      |      |      |      |      |      |      |      |      |      |      |      |      |      |      |      |      |      |      |      |          |    |    |    |   |   |     |   |       |    |    |       |    |    |    |    |     |                   |                  |      |                  |    |                   |                   |                   |    |           |       |      |       |      |       |       |       |       |       |       |       |       |       |       |       |       |       |      |      |      |      |      |      |       |       |  |  |  |    |  |  |  |  |  |  |    |  |  |  |    |  |  |  |  |  |  |  |  |  |  |  |
| Score                                                                                                                                                                                                                                                                                                                                                                                                                                                                                                                                                                                                                                                                                                                                                                                                                                                                                                                                                                                                                                                                                                                                                                                                                                                                                                                                                                                                                                                                                                                                                                                                                                                                                                                                                                                                                                                                                                                                                                                                                                                                                                                                                                                                                                                                                                                                                                                                                                                                                                                                                                                                                                                                                                                                                                                                                                                                                                                                                                                         | 0.20   | 0.50    | 0.50   | 1.00             | 1.00           | 0.20                    | 1.00                            | 0.50                       | 0.75                        | 0.75               | 0.50    | 0.75        | 0.75              | 0.75                                                                   | 0.75               | 0.75    | 1.50                  | 1.50                  | 0.75    | 1.50                  | 0.50    | 1.50                  | 1.50                  | 1.50                  | 1.50    |         |         |         |         |         |         |                       |                       |         |                       |         |                       |                       |                       |         |                         |      |      |       |      |      |      |      |      |      |      |      |      |      |      |      |      |      |      |      |      |      |       |      |      |       |                       |      |      |       |      |      |      |      |       |       |       |       |       |       |       |       |       |       |       |       |       |       |       |       |       |        |       |      |      |      |      |      |      |      |      |      |      |      |      |      |      |      |      |      |      |      |      |      |      |      |      |      |          |    |    |    |   |   |     |   |       |    |    |       |    |    |    |    |     |                   |                  |      |                  |    |                   |                   |                   |    |           |       |      |       |      |       |       |       |       |       |       |       |       |       |       |       |       |       |      |      |      |      |      |      |       |       |  |  |  |    |  |  |  |  |  |  |    |  |  |  |    |  |  |  |  |  |  |  |  |  |  |  |
| Ion-type                                                                                                                                                                                                                                                                                                                                                                                                                                                                                                                                                                                                                                                                                                                                                                                                                                                                                                                                                                                                                                                                                                                                                                                                                                                                                                                                                                                                                                                                                                                                                                                                                                                                                                                                                                                                                                                                                                                                                                                                                                                                                                                                                                                                                                                                                                                                                                                                                                                                                                                                                                                                                                                                                                                                                                                                                                                                                                                                                                                      | PR     | KQ      | a1     | E                | F              | RKQ                     | Y                               | PA-28                      | PA                          | a2                 | PF-28   | IN          | b2                | PF                                                                     | FK                 | FKP     | y10 <sup>+3</sup>     | y7 <sup>+2</sup>      | EINF    | y8 <sup>+2</sup>      | b5      | y10 <sup>+2</sup>     | y11 <sup>+2</sup>     | y12 <sup>+2</sup>     | y7      |         |         |         |         |         |         |                       |                       |         |                       |         |                       |                       |                       |         |                         |      |      |       |      |      |      |      |      |      |      |      |      |      |      |      |      |      |      |      |      |      |       |      |      |       |                       |      |      |       |      |      |      |      |       |       |       |       |       |       |       |       |       |       |       |       |       |       |       |       |       |        |       |      |      |      |      |      |      |      |      |      |      |      |      |      |      |      |      |      |      |      |      |      |      |      |      |      |          |    |    |    |   |   |     |   |       |    |    |       |    |    |    |    |     |                   |                  |      |                  |    |                   |                   |                   |    |           |       |      |       |      |       |       |       |       |       |       |       |       |       |       |       |       |       |      |      |      |      |      |      |       |       |  |  |  |    |  |  |  |  |  |  |    |  |  |  |    |  |  |  |  |  |  |  |  |  |  |  |
| Delta ppm                                                                                                                                                                                                                                                                                                                                                                                                                                                                                                                                                                                                                                                                                                                                                                                                                                                                                                                                                                                                                                                                                                                                                                                                                                                                                                                                                                                                                                                                                                                                                                                                                                                                                                                                                                                                                                                                                                                                                                                                                                                                                                                                                                                                                                                                                                                                                                                                                                                                                                                                                                                                                                                                                                                                                                                                                                                                                                                                                                                     | -17.5  | -9.2    | -30.5  | 0.50             | -11.3          | -15.6                   | -14.2                           | -17.6                      | -27.9                       | -21.6              | -19.6   | -20.9       | -12.6             | -12.5                                                                  | -11.2              | -13.2   | -17.5                 | -0.9                  | -3.7    | -1.3                  | -3.0    | -7.0                  | -6.4                  | -12.8                 | -10.9   |         |         |         |         |         |         |                       |                       |         |                       |         |                       |                       |                       |         |                         |      |      |       |      |      |      |      |      |      |      |      |      |      |      |      |      |      |      |      |      |      |       |      |      |       |                       |      |      |       |      |      |      |      |       |       |       |       |       |       |       |       |       |       |       |       |       |       |       |       |       |        |       |      |      |      |      |      |      |      |      |      |      |      |      |      |      |      |      |      |      |      |      |      |      |      |      |      |          |    |    |    |   |   |     |   |       |    |    |       |    |    |    |    |     |                   |                  |      |                  |    |                   |                   |                   |    |           |       |      |       |      |       |       |       |       |       |       |       |       |       |       |       |       |       |      |      |      |      |      |      |       |       |  |  |  |    |  |  |  |  |  |  |    |  |  |  |    |  |  |  |  |  |  |  |  |  |  |  |
|                                                                                                                                                                                                                                                                                                                                                                                                                                                                                                                                                                                                                                                                                                                                                                                                                                                                                                                                                                                                                                                                                                                                                                                                                                                                                                                                                                                                                                                                                                                                                                                                                                                                                                                                                                                                                                                                                                                                                                                                                                                                                                                                                                                                                                                                                                                                                                                                                                                                                                                                                                                                                                                                                                                                                                                                                                                                                                                                                                                               |        |         | LI     |                  |                |                         |                                 |                            |                             | IT                 |         |             |                   | EI                                                                     |                    |         |                       |                       |         |                       |         |                       |                       |                       |         |         |         |         |         |         |         |                       |                       |         |                       |         |                       |                       |                       |         |                         |      |      |       |      |      |      |      |      |      |      |      |      |      |      |      |      |      |      |      |      |      |       |      |      |       |                       |      |      |       |      |      |      |      |       |       |       |       |       |       |       |       |       |       |       |       |       |       |       |       |       |        |       |      |      |      |      |      |      |      |      |      |      |      |      |      |      |      |      |      |      |      |      |      |      |      |      |      |          |    |    |    |   |   |     |   |       |    |    |       |    |    |    |    |     |                   |                  |      |                  |    |                   |                   |                   |    |           |       |      |       |      |       |       |       |       |       |       |       |       |       |       |       |       |       |      |      |      |      |      |      |       |       |  |  |  |    |  |  |  |  |  |  |    |  |  |  |    |  |  |  |  |  |  |  |  |  |  |  |

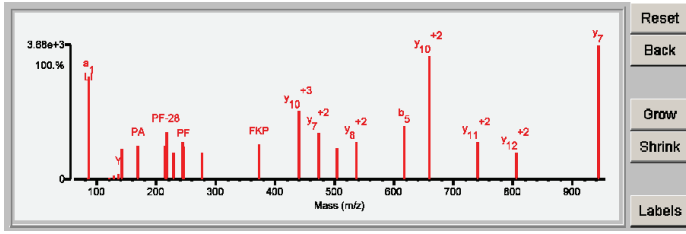

Result Summary

| Rank | Score | SPI (%) | BCS | # Unmatched ions | Variable sites | Sequence                   | MH <sup>+</sup> Calculated (Da) | MH <sup>+</sup> Error (Da) | MH <sup>+</sup> Error (ppm) | Protein MW/pl (Da) | Species | Accession # | Protein Name                                                                       |
|------|-------|---------|-----|------------------|----------------|----------------------------|---------------------------------|----------------------------|-----------------------------|--------------------|---------|-------------|------------------------------------------------------------------------------------|
| 1    | 22.40 | 100.0   | 7   | 0/25             | K71k           | (R)IEINFPAEYPPKPPKITFK(T)  | 2279.2475                       | 114.0463                   | 1.4                         | 17861.7/8.68       | HUMAN   | P68036      | Ubiquitin-conjugating enzyme E2 L3 OS=Homo sapiens GN=UBE2L3 PE=1 SV=1             |
| 1    | 22.40 | 100.0   | 7   | 0/25             | K67k           | (R)IEINFPAEYPPKPPKITFK(T)  | 2279.2475                       | 114.0463                   | 1.4                         | 17861.7/8.68       | HUMAN   | P68036      | Ubiquitin-conjugating enzyme E2 L3 OS=Homo sapiens GN=UBE2L3 PE=1 SV=1             |
| 2    | 16.09 | 75.2    | 6   | 4/25             | K64k           | (R)IEINFPAEYPPKPPKITFK(T)  | 2279.2475                       | 114.0463                   | 1.4                         | 17861.7/8.68       | HUMAN   | P68036      | Ubiquitin-conjugating enzyme E2 L3 OS=Homo sapiens GN=UBE2L3 PE=1 SV=1             |
| 3    | 10.62 | 65.7    | 2   | 9/25             | M2875m K2884k  | (K)EVMGKANAPYIKQIFPVTEK(E) | 2263.2155                       | 130.0783                   | 16.9                        | 470773.9/6.05      | HUMAN   | RQ8TD57     | REVERSE Dynein heavy chain 3, axonemal OS=Homo sapiens GN=DNAH3 PE=2 SV=1          |
| 4    | 8.55  | 52.4    | 5   | 11/25            | M456m          | (R)TIKmvCGDRIMKWWLATNR(S)  | 2377.2665                       | 16.0273                    | 13.5                        | 77401.1/9.11       | HUMAN   | R8K979      | REVERSE Exonuclease domain-containing protein 1 OS=Homo sapiens GN=EXOD1 PE=2 SV=1 |

Detailed Results

| Rank                                                                                                                                                                                                                                                                                                                                                                                                                                                                                                                                                                                                                                                                                                                                                                                                                                                                                                                                                                                                                                                                                                                                                                                                                                                                                                                                                                                                                                                                                                                                                                                                                                                                                                                                                                                                                                                                                                                                                                                                                                                                                                                                                                                                                                                                                                                                                                                                                                                                                                                                                                                                                                                                                                      | Score  | SPI (%) | BCS    | # Unmatched ions | Variable sites | Sequence                                          | MH <sup>+</sup> Calculated (Da) | MH <sup>+</sup> Error (Da) | MH <sup>+</sup> Error (ppm) | Protein MW/pl (Da) | Species | Accession # | MS-Digest Index # | Protein Name                                                           |         |                    |                       |                       |         |                       |         |                       |                       |                       |         |         |         |         |         |         |         |         |                       |                       |         |                       |         |                       |                       |                       |         |                         |      |      |       |      |      |      |      |      |      |      |      |      |      |      |      |      |      |      |      |      |      |       |      |      |       |                       |      |      |       |      |      |      |      |       |       |       |       |       |       |       |       |       |       |       |       |       |       |       |       |       |        |       |      |      |      |      |      |      |      |      |      |      |      |      |      |      |      |      |      |      |      |      |      |      |      |      |      |          |    |    |    |   |   |     |   |       |    |    |       |    |    |    |    |     |                   |                  |      |                  |    |                   |                   |                   |    |           |       |      |       |       |       |       |       |       |       |       |       |       |       |       |       |       |      |      |      |      |      |      |       |       |       |
|-----------------------------------------------------------------------------------------------------------------------------------------------------------------------------------------------------------------------------------------------------------------------------------------------------------------------------------------------------------------------------------------------------------------------------------------------------------------------------------------------------------------------------------------------------------------------------------------------------------------------------------------------------------------------------------------------------------------------------------------------------------------------------------------------------------------------------------------------------------------------------------------------------------------------------------------------------------------------------------------------------------------------------------------------------------------------------------------------------------------------------------------------------------------------------------------------------------------------------------------------------------------------------------------------------------------------------------------------------------------------------------------------------------------------------------------------------------------------------------------------------------------------------------------------------------------------------------------------------------------------------------------------------------------------------------------------------------------------------------------------------------------------------------------------------------------------------------------------------------------------------------------------------------------------------------------------------------------------------------------------------------------------------------------------------------------------------------------------------------------------------------------------------------------------------------------------------------------------------------------------------------------------------------------------------------------------------------------------------------------------------------------------------------------------------------------------------------------------------------------------------------------------------------------------------------------------------------------------------------------------------------------------------------------------------------------------------------|--------|---------|--------|------------------|----------------|---------------------------------------------------|---------------------------------|----------------------------|-----------------------------|--------------------|---------|-------------|-------------------|------------------------------------------------------------------------|---------|--------------------|-----------------------|-----------------------|---------|-----------------------|---------|-----------------------|-----------------------|-----------------------|---------|---------|---------|---------|---------|---------|---------|---------|-----------------------|-----------------------|---------|-----------------------|---------|-----------------------|-----------------------|-----------------------|---------|-------------------------|------|------|-------|------|------|------|------|------|------|------|------|------|------|------|------|------|------|------|------|------|------|-------|------|------|-------|-----------------------|------|------|-------|------|------|------|------|-------|-------|-------|-------|-------|-------|-------|-------|-------|-------|-------|-------|-------|-------|-------|-------|-------|--------|-------|------|------|------|------|------|------|------|------|------|------|------|------|------|------|------|------|------|------|------|------|------|------|------|------|------|----------|----|----|----|---|---|-----|---|-------|----|----|-------|----|----|----|----|-----|-------------------|------------------|------|------------------|----|-------------------|-------------------|-------------------|----|-----------|-------|------|-------|-------|-------|-------|-------|-------|-------|-------|-------|-------|-------|-------|-------|-------|------|------|------|------|------|------|-------|-------|-------|
| 1                                                                                                                                                                                                                                                                                                                                                                                                                                                                                                                                                                                                                                                                                                                                                                                                                                                                                                                                                                                                                                                                                                                                                                                                                                                                                                                                                                                                                                                                                                                                                                                                                                                                                                                                                                                                                                                                                                                                                                                                                                                                                                                                                                                                                                                                                                                                                                                                                                                                                                                                                                                                                                                                                                         | 22.40  | 100.0   | 7      | 0/25             | K71k           | (R) I E I N F P A E Y P P F K P P K I T F K ( T ) | 2279.2475                       | 114.0463                   | 1.4                         | 17861.7/8.68       | HUMAN   | P68036      | 812013            | Ubiquitin-conjugating enzyme E2 L3 OS=Homo sapiens GN=UBE2L3 PE=1 SV=1 |         |                    |                       |                       |         |                       |         |                       |                       |                       |         |         |         |         |         |         |         |         |                       |                       |         |                       |         |                       |                       |                       |         |                         |      |      |       |      |      |      |      |      |      |      |      |      |      |      |      |      |      |      |      |      |      |       |      |      |       |                       |      |      |       |      |      |      |      |       |       |       |       |       |       |       |       |       |       |       |       |       |       |       |       |       |        |       |      |      |      |      |      |      |      |      |      |      |      |      |      |      |      |      |      |      |      |      |      |      |      |      |      |          |    |    |    |   |   |     |   |       |    |    |       |    |    |    |    |     |                   |                  |      |                  |    |                   |                   |                   |    |           |       |      |       |       |       |       |       |       |       |       |       |       |       |       |       |       |      |      |      |      |      |      |       |       |       |
| <table border="1"> <thead> <tr> <th>Fragment-ion (m/z)</th> <th>70.064</th> <th>84.080</th> <th>86.095</th> <th>102.054</th> <th>120.079</th> <th>129.100</th> <th>136.073</th> <th>141.099</th> <th>169.095</th> <th>215.136</th> <th>217.130</th> <th>228.132</th> <th>243.132</th> <th>245.127</th> <th>276.168</th> <th>373.218</th> <th>439.596<sup>+3</sup></th> <th>472.780<sup>+2</sup></th> <th>504.246</th> <th>536.828<sup>+2</sup></th> <th>617.326</th> <th>658.886<sup>+2</sup></th> <th>740.412<sup>+2</sup></th> <th>804.933<sup>+2</sup></th> <th>944.546</th> </tr> </thead> <tbody> <tr> <td>Frac. Inten. (% of TIC)</td> <td>0.02</td> <td>0.17</td> <td>10.46</td> <td>0.11</td> <td>0.20</td> <td>0.37</td> <td>0.55</td> <td>3.16</td> <td>3.45</td> <td>3.44</td> <td>4.81</td> <td>2.77</td> <td>3.78</td> <td>3.38</td> <td>2.79</td> <td>3.57</td> <td>7.00</td> <td>4.76</td> <td>3.17</td> <td>3.82</td> <td>5.48</td> <td>12.54</td> <td>3.78</td> <td>2.74</td> <td>13.70</td> </tr> <tr> <td>Rel. Inten. (% of BP)</td> <td>0.17</td> <td>1.26</td> <td>76.36</td> <td>0.84</td> <td>1.46</td> <td>2.69</td> <td>3.99</td> <td>23.05</td> <td>25.17</td> <td>25.13</td> <td>35.09</td> <td>20.21</td> <td>27.56</td> <td>24.70</td> <td>20.35</td> <td>26.05</td> <td>51.12</td> <td>34.74</td> <td>23.13</td> <td>27.85</td> <td>39.99</td> <td>91.51</td> <td>27.59</td> <td>19.98</td> <td>100.00</td> </tr> <tr> <td>Score</td> <td>0.20</td> <td>0.50</td> <td>0.50</td> <td>1.00</td> <td>1.00</td> <td>0.20</td> <td>1.00</td> <td>0.50</td> <td>0.75</td> <td>0.75</td> <td>0.50</td> <td>0.75</td> <td>0.75</td> <td>0.75</td> <td>0.75</td> <td>0.75</td> <td>1.50</td> <td>1.50</td> <td>1.50</td> <td>1.50</td> <td>0.50</td> <td>1.50</td> <td>1.50</td> <td>1.50</td> <td>1.50</td> </tr> <tr> <td>Ion-type</td> <td>PR</td> <td>KQ</td> <td>a1</td> <td>E</td> <td>F</td> <td>RKQ</td> <td>Y</td> <td>PA-28</td> <td>PA</td> <td>a2</td> <td>PF-28</td> <td>IN</td> <td>b2</td> <td>PF</td> <td>FK</td> <td>FKP</td> <td>Y10<sup>+3</sup></td> <td>Y7<sup>+2</sup></td> <td>EINF</td> <td>Y6<sup>+2</sup></td> <td>b5</td> <td>Y10<sup>+2</sup></td> <td>Y11<sup>+2</sup></td> <td>Y12<sup>+2</sup></td> <td>Y7</td> </tr> <tr> <td>Delta ppm</td> <td>-17.5</td> <td>-9.2</td> <td>-30.5</td> <td>-11.3</td> <td>-15.6</td> <td>-14.2</td> <td>-17.6</td> <td>-27.9</td> <td>-21.6</td> <td>-19.6</td> <td>-20.9</td> <td>-12.6</td> <td>-12.5</td> <td>-11.2</td> <td>-13.2</td> <td>-17.5</td> <td>-0.9</td> <td>-3.7</td> <td>-1.3</td> <td>-3.0</td> <td>-7.0</td> <td>-6.4</td> <td>-12.8</td> <td>-12.8</td> <td>-10.9</td> </tr> </tbody> </table> |        |         |        |                  |                |                                                   |                                 |                            |                             |                    |         |             |                   |                                                                        |         | Fragment-ion (m/z) | 70.064                | 84.080                | 86.095  | 102.054               | 120.079 | 129.100               | 136.073               | 141.099               | 169.095 | 215.136 | 217.130 | 228.132 | 243.132 | 245.127 | 276.168 | 373.218 | 439.596 <sup>+3</sup> | 472.780 <sup>+2</sup> | 504.246 | 536.828 <sup>+2</sup> | 617.326 | 658.886 <sup>+2</sup> | 740.412 <sup>+2</sup> | 804.933 <sup>+2</sup> | 944.546 | Frac. Inten. (% of TIC) | 0.02 | 0.17 | 10.46 | 0.11 | 0.20 | 0.37 | 0.55 | 3.16 | 3.45 | 3.44 | 4.81 | 2.77 | 3.78 | 3.38 | 2.79 | 3.57 | 7.00 | 4.76 | 3.17 | 3.82 | 5.48 | 12.54 | 3.78 | 2.74 | 13.70 | Rel. Inten. (% of BP) | 0.17 | 1.26 | 76.36 | 0.84 | 1.46 | 2.69 | 3.99 | 23.05 | 25.17 | 25.13 | 35.09 | 20.21 | 27.56 | 24.70 | 20.35 | 26.05 | 51.12 | 34.74 | 23.13 | 27.85 | 39.99 | 91.51 | 27.59 | 19.98 | 100.00 | Score | 0.20 | 0.50 | 0.50 | 1.00 | 1.00 | 0.20 | 1.00 | 0.50 | 0.75 | 0.75 | 0.50 | 0.75 | 0.75 | 0.75 | 0.75 | 0.75 | 1.50 | 1.50 | 1.50 | 1.50 | 0.50 | 1.50 | 1.50 | 1.50 | 1.50 | Ion-type | PR | KQ | a1 | E | F | RKQ | Y | PA-28 | PA | a2 | PF-28 | IN | b2 | PF | FK | FKP | Y10 <sup>+3</sup> | Y7 <sup>+2</sup> | EINF | Y6 <sup>+2</sup> | b5 | Y10 <sup>+2</sup> | Y11 <sup>+2</sup> | Y12 <sup>+2</sup> | Y7 | Delta ppm | -17.5 | -9.2 | -30.5 | -11.3 | -15.6 | -14.2 | -17.6 | -27.9 | -21.6 | -19.6 | -20.9 | -12.6 | -12.5 | -11.2 | -13.2 | -17.5 | -0.9 | -3.7 | -1.3 | -3.0 | -7.0 | -6.4 | -12.8 | -12.8 | -10.9 |
| Fragment-ion (m/z)                                                                                                                                                                                                                                                                                                                                                                                                                                                                                                                                                                                                                                                                                                                                                                                                                                                                                                                                                                                                                                                                                                                                                                                                                                                                                                                                                                                                                                                                                                                                                                                                                                                                                                                                                                                                                                                                                                                                                                                                                                                                                                                                                                                                                                                                                                                                                                                                                                                                                                                                                                                                                                                                                        | 70.064 | 84.080  | 86.095 | 102.054          | 120.079        | 129.100                                           | 136.073                         | 141.099                    | 169.095                     | 215.136            | 217.130 | 228.132     | 243.132           | 245.127                                                                | 276.168 | 373.218            | 439.596 <sup>+3</sup> | 472.780 <sup>+2</sup> | 504.246 | 536.828 <sup>+2</sup> | 617.326 | 658.886 <sup>+2</sup> | 740.412 <sup>+2</sup> | 804.933 <sup>+2</sup> | 944.546 |         |         |         |         |         |         |         |                       |                       |         |                       |         |                       |                       |                       |         |                         |      |      |       |      |      |      |      |      |      |      |      |      |      |      |      |      |      |      |      |      |      |       |      |      |       |                       |      |      |       |      |      |      |      |       |       |       |       |       |       |       |       |       |       |       |       |       |       |       |       |       |        |       |      |      |      |      |      |      |      |      |      |      |      |      |      |      |      |      |      |      |      |      |      |      |      |      |      |          |    |    |    |   |   |     |   |       |    |    |       |    |    |    |    |     |                   |                  |      |                  |    |                   |                   |                   |    |           |       |      |       |       |       |       |       |       |       |       |       |       |       |       |       |       |      |      |      |      |      |      |       |       |       |
| Frac. Inten. (% of TIC)                                                                                                                                                                                                                                                                                                                                                                                                                                                                                                                                                                                                                                                                                                                                                                                                                                                                                                                                                                                                                                                                                                                                                                                                                                                                                                                                                                                                                                                                                                                                                                                                                                                                                                                                                                                                                                                                                                                                                                                                                                                                                                                                                                                                                                                                                                                                                                                                                                                                                                                                                                                                                                                                                   | 0.02   | 0.17    | 10.46  | 0.11             | 0.20           | 0.37                                              | 0.55                            | 3.16                       | 3.45                        | 3.44               | 4.81    | 2.77        | 3.78              | 3.38                                                                   | 2.79    | 3.57               | 7.00                  | 4.76                  | 3.17    | 3.82                  | 5.48    | 12.54                 | 3.78                  | 2.74                  | 13.70   |         |         |         |         |         |         |         |                       |                       |         |                       |         |                       |                       |                       |         |                         |      |      |       |      |      |      |      |      |      |      |      |      |      |      |      |      |      |      |      |      |      |       |      |      |       |                       |      |      |       |      |      |      |      |       |       |       |       |       |       |       |       |       |       |       |       |       |       |       |       |       |        |       |      |      |      |      |      |      |      |      |      |      |      |      |      |      |      |      |      |      |      |      |      |      |      |      |      |          |    |    |    |   |   |     |   |       |    |    |       |    |    |    |    |     |                   |                  |      |                  |    |                   |                   |                   |    |           |       |      |       |       |       |       |       |       |       |       |       |       |       |       |       |       |      |      |      |      |      |      |       |       |       |
| Rel. Inten. (% of BP)                                                                                                                                                                                                                                                                                                                                                                                                                                                                                                                                                                                                                                                                                                                                                                                                                                                                                                                                                                                                                                                                                                                                                                                                                                                                                                                                                                                                                                                                                                                                                                                                                                                                                                                                                                                                                                                                                                                                                                                                                                                                                                                                                                                                                                                                                                                                                                                                                                                                                                                                                                                                                                                                                     | 0.17   | 1.26    | 76.36  | 0.84             | 1.46           | 2.69                                              | 3.99                            | 23.05                      | 25.17                       | 25.13              | 35.09   | 20.21       | 27.56             | 24.70                                                                  | 20.35   | 26.05              | 51.12                 | 34.74                 | 23.13   | 27.85                 | 39.99   | 91.51                 | 27.59                 | 19.98                 | 100.00  |         |         |         |         |         |         |         |                       |                       |         |                       |         |                       |                       |                       |         |                         |      |      |       |      |      |      |      |      |      |      |      |      |      |      |      |      |      |      |      |      |      |       |      |      |       |                       |      |      |       |      |      |      |      |       |       |       |       |       |       |       |       |       |       |       |       |       |       |       |       |       |        |       |      |      |      |      |      |      |      |      |      |      |      |      |      |      |      |      |      |      |      |      |      |      |      |      |      |          |    |    |    |   |   |     |   |       |    |    |       |    |    |    |    |     |                   |                  |      |                  |    |                   |                   |                   |    |           |       |      |       |       |       |       |       |       |       |       |       |       |       |       |       |       |      |      |      |      |      |      |       |       |       |
| Score                                                                                                                                                                                                                                                                                                                                                                                                                                                                                                                                                                                                                                                                                                                                                                                                                                                                                                                                                                                                                                                                                                                                                                                                                                                                                                                                                                                                                                                                                                                                                                                                                                                                                                                                                                                                                                                                                                                                                                                                                                                                                                                                                                                                                                                                                                                                                                                                                                                                                                                                                                                                                                                                                                     | 0.20   | 0.50    | 0.50   | 1.00             | 1.00           | 0.20                                              | 1.00                            | 0.50                       | 0.75                        | 0.75               | 0.50    | 0.75        | 0.75              | 0.75                                                                   | 0.75    | 0.75               | 1.50                  | 1.50                  | 1.50    | 1.50                  | 0.50    | 1.50                  | 1.50                  | 1.50                  | 1.50    |         |         |         |         |         |         |         |                       |                       |         |                       |         |                       |                       |                       |         |                         |      |      |       |      |      |      |      |      |      |      |      |      |      |      |      |      |      |      |      |      |      |       |      |      |       |                       |      |      |       |      |      |      |      |       |       |       |       |       |       |       |       |       |       |       |       |       |       |       |       |       |        |       |      |      |      |      |      |      |      |      |      |      |      |      |      |      |      |      |      |      |      |      |      |      |      |      |      |          |    |    |    |   |   |     |   |       |    |    |       |    |    |    |    |     |                   |                  |      |                  |    |                   |                   |                   |    |           |       |      |       |       |       |       |       |       |       |       |       |       |       |       |       |       |      |      |      |      |      |      |       |       |       |
| Ion-type                                                                                                                                                                                                                                                                                                                                                                                                                                                                                                                                                                                                                                                                                                                                                                                                                                                                                                                                                                                                                                                                                                                                                                                                                                                                                                                                                                                                                                                                                                                                                                                                                                                                                                                                                                                                                                                                                                                                                                                                                                                                                                                                                                                                                                                                                                                                                                                                                                                                                                                                                                                                                                                                                                  | PR     | KQ      | a1     | E                | F              | RKQ                                               | Y                               | PA-28                      | PA                          | a2                 | PF-28   | IN          | b2                | PF                                                                     | FK      | FKP                | Y10 <sup>+3</sup>     | Y7 <sup>+2</sup>      | EINF    | Y6 <sup>+2</sup>      | b5      | Y10 <sup>+2</sup>     | Y11 <sup>+2</sup>     | Y12 <sup>+2</sup>     | Y7      |         |         |         |         |         |         |         |                       |                       |         |                       |         |                       |                       |                       |         |                         |      |      |       |      |      |      |      |      |      |      |      |      |      |      |      |      |      |      |      |      |      |       |      |      |       |                       |      |      |       |      |      |      |      |       |       |       |       |       |       |       |       |       |       |       |       |       |       |       |       |       |        |       |      |      |      |      |      |      |      |      |      |      |      |      |      |      |      |      |      |      |      |      |      |      |      |      |      |          |    |    |    |   |   |     |   |       |    |    |       |    |    |    |    |     |                   |                  |      |                  |    |                   |                   |                   |    |           |       |      |       |       |       |       |       |       |       |       |       |       |       |       |       |       |      |      |      |      |      |      |       |       |       |
| Delta ppm                                                                                                                                                                                                                                                                                                                                                                                                                                                                                                                                                                                                                                                                                                                                                                                                                                                                                                                                                                                                                                                                                                                                                                                                                                                                                                                                                                                                                                                                                                                                                                                                                                                                                                                                                                                                                                                                                                                                                                                                                                                                                                                                                                                                                                                                                                                                                                                                                                                                                                                                                                                                                                                                                                 | -17.5  | -9.2    | -30.5  | -11.3            | -15.6          | -14.2                                             | -17.6                           | -27.9                      | -21.6                       | -19.6              | -20.9   | -12.6       | -12.5             | -11.2                                                                  | -13.2   | -17.5              | -0.9                  | -3.7                  | -1.3    | -3.0                  | -7.0    | -6.4                  | -12.8                 | -12.8                 | -10.9   |         |         |         |         |         |         |         |                       |                       |         |                       |         |                       |                       |                       |         |                         |      |      |       |      |      |      |      |      |      |      |      |      |      |      |      |      |      |      |      |      |      |       |      |      |       |                       |      |      |       |      |      |      |      |       |       |       |       |       |       |       |       |       |       |       |       |       |       |       |       |       |        |       |      |      |      |      |      |      |      |      |      |      |      |      |      |      |      |      |      |      |      |      |      |      |      |      |      |          |    |    |    |   |   |     |   |       |    |    |       |    |    |    |    |     |                   |                  |      |                  |    |                   |                   |                   |    |           |       |      |       |       |       |       |       |       |       |       |       |       |       |       |       |       |      |      |      |      |      |      |       |       |       |

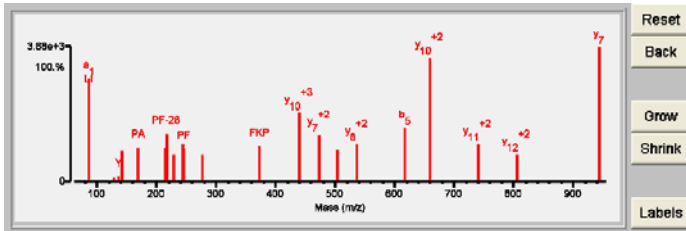

Result Summary

| Rank | Score | SPI (%) | BCS | # Unmatched Ions | Variable sites | Sequence        | MH <sup>+</sup> Calculated (Da) | MH <sup>+</sup> Error (Da) | MH <sup>+</sup> Error (ppm) | Protein MW/pI (Da) | Species | Accession # | Protein Name                                                         |
|------|-------|---------|-----|------------------|----------------|-----------------|---------------------------------|----------------------------|-----------------------------|--------------------|---------|-------------|----------------------------------------------------------------------|
| 1    | 16.81 | 84.5    | 6   | 7/25             | K92K           | (R)ICLDILKDK(W) | 1117.6286                       | 114.0490                   | 4.9                         | 17137.9/6.13       | HUMAN   | P61088      | Ubiquitin-conjugating enzyme E2 N OS=Homo sapiens GN=UBE2N PE=1 SV=1 |
| 2    | 14.18 | 81.7    | 5   | 9/25             | K94K           | (R)ICLDILKDK(W) | 1117.6286                       | 114.0490                   | 4.9                         | 17137.9/6.13       | HUMAN   | P61088      | Ubiquitin-conjugating enzyme E2 N OS=Homo sapiens GN=UBE2N PE=1 SV=1 |
| 3    | 7.30  | 62.0    | 3   | 14/25            | None           | (R)ICDELILIK(N) | 1231.6603                       | 0.0173                     | 14.0                        | 60343.9/5.80       | HUMAN   | P17987      | T-complex protein 1 subunit alpha OS=Homo sapiens GN=CCT1 PE=1 SV=1  |

Detailed Results

| Rank                                                                                                                                                                                                                                                                                                                                                                                                                                                                                                                                                                                                                                                                                                                                                                                                                                                                                                                                                                                                                                                                                                                                                                                                                                                                                                                                                                                                                                                                                                                                                                                                                                                                                                                                                                                                                                                                                                                                                                                                                                                                                                                                                                                                                                                                                                                                                                                                                                                                                                                                                                                                                                                                                                                                                                                                                                                                                            | Score  | SPI (%) | BCS    | # Unmatched Ions | Variable sites | Sequence        | MH <sup>+</sup> Calculated (Da) | MH <sup>+</sup> Error (Da) | MH <sup>+</sup> Error (ppm) | Protein MW/pI (Da) | Species | Accession # | MS-Digest Index # | Protein Name                                                         |                    |         |         |         |           |           |         |         |         |         |          |         |         |         |         |         |         |         |         |           |           |         |         |         |         |          |                         |      |       |      |      |      |      |      |      |      |      |      |      |      |      |      |      |      |      |      |      |      |      |      |       |      |                       |      |        |      |       |      |      |      |       |       |      |       |      |      |      |      |       |       |       |      |       |      |       |       |       |       |       |      |      |       |       |       |       |       |      |       |      |      |       |      |      |      |      |      |      |      |      |      |      |      |      |      |          |    |    |  |  |  |  |  |    |  |    |    |  |     |    |    |     |    |    |          |      |       |    |    |    |    |           |     |       |      |  |  |  |  |      |  |     |      |  |       |      |       |      |      |     |      |     |     |      |     |     |      |  |  |  |  |  |  |  |  |       |  |  |    |  |  |  |  |  |      |  |  |  |  |  |  |  |  |  |  |  |  |  |  |  |  |  |      |  |  |      |  |  |  |  |  |      |  |  |  |  |  |  |  |  |  |
|-------------------------------------------------------------------------------------------------------------------------------------------------------------------------------------------------------------------------------------------------------------------------------------------------------------------------------------------------------------------------------------------------------------------------------------------------------------------------------------------------------------------------------------------------------------------------------------------------------------------------------------------------------------------------------------------------------------------------------------------------------------------------------------------------------------------------------------------------------------------------------------------------------------------------------------------------------------------------------------------------------------------------------------------------------------------------------------------------------------------------------------------------------------------------------------------------------------------------------------------------------------------------------------------------------------------------------------------------------------------------------------------------------------------------------------------------------------------------------------------------------------------------------------------------------------------------------------------------------------------------------------------------------------------------------------------------------------------------------------------------------------------------------------------------------------------------------------------------------------------------------------------------------------------------------------------------------------------------------------------------------------------------------------------------------------------------------------------------------------------------------------------------------------------------------------------------------------------------------------------------------------------------------------------------------------------------------------------------------------------------------------------------------------------------------------------------------------------------------------------------------------------------------------------------------------------------------------------------------------------------------------------------------------------------------------------------------------------------------------------------------------------------------------------------------------------------------------------------------------------------------------------------|--------|---------|--------|------------------|----------------|-----------------|---------------------------------|----------------------------|-----------------------------|--------------------|---------|-------------|-------------------|----------------------------------------------------------------------|--------------------|---------|---------|---------|-----------|-----------|---------|---------|---------|---------|----------|---------|---------|---------|---------|---------|---------|---------|---------|-----------|-----------|---------|---------|---------|---------|----------|-------------------------|------|-------|------|------|------|------|------|------|------|------|------|------|------|------|------|------|------|------|------|------|------|------|------|-------|------|-----------------------|------|--------|------|-------|------|------|------|-------|-------|------|-------|------|------|------|------|-------|-------|-------|------|-------|------|-------|-------|-------|-------|-------|------|------|-------|-------|-------|-------|-------|------|-------|------|------|-------|------|------|------|------|------|------|------|------|------|------|------|------|------|----------|----|----|--|--|--|--|--|----|--|----|----|--|-----|----|----|-----|----|----|----------|------|-------|----|----|----|----|-----------|-----|-------|------|--|--|--|--|------|--|-----|------|--|-------|------|-------|------|------|-----|------|-----|-----|------|-----|-----|------|--|--|--|--|--|--|--|--|-------|--|--|----|--|--|--|--|--|------|--|--|--|--|--|--|--|--|--|--|--|--|--|--|--|--|--|------|--|--|------|--|--|--|--|--|------|--|--|--|--|--|--|--|--|--|
| 1                                                                                                                                                                                                                                                                                                                                                                                                                                                                                                                                                                                                                                                                                                                                                                                                                                                                                                                                                                                                                                                                                                                                                                                                                                                                                                                                                                                                                                                                                                                                                                                                                                                                                                                                                                                                                                                                                                                                                                                                                                                                                                                                                                                                                                                                                                                                                                                                                                                                                                                                                                                                                                                                                                                                                                                                                                                                                               | 16.81  | 84.5    | 6      | 7/25             | K92K           | (R)ICLDILKDK(W) | 1117.6286                       | 114.0490                   | 4.9                         | 17137.9/6.13       | HUMAN   | P61088      | 812593            | Ubiquitin-conjugating enzyme E2 N OS=Homo sapiens GN=UBE2N PE=1 SV=1 |                    |         |         |         |           |           |         |         |         |         |          |         |         |         |         |         |         |         |         |           |           |         |         |         |         |          |                         |      |       |      |      |      |      |      |      |      |      |      |      |      |      |      |      |      |      |      |      |      |      |      |       |      |                       |      |        |      |       |      |      |      |       |       |      |       |      |      |      |      |       |       |       |      |       |      |       |       |       |       |       |      |      |       |       |       |       |       |      |       |      |      |       |      |      |      |      |      |      |      |      |      |      |      |      |      |          |    |    |  |  |  |  |  |    |  |    |    |  |     |    |    |     |    |    |          |      |       |    |    |    |    |           |     |       |      |  |  |  |  |      |  |     |      |  |       |      |       |      |      |     |      |     |     |      |     |     |      |  |  |  |  |  |  |  |  |       |  |  |    |  |  |  |  |  |      |  |  |  |  |  |  |  |  |  |  |  |  |  |  |  |  |  |      |  |  |      |  |  |  |  |  |      |  |  |  |  |  |  |  |  |  |
| <table border="1"> <thead> <tr> <th>Fragment-ion (m/z)</th> <th>84.081</th><th>86.096</th><th>87.099</th><th>131.117</th><th>133.041</th><th>157.133</th><th>229.109</th><th>246.126</th><th>257.096</th><th>262.141</th><th>274.123</th><th>296.198</th><th>342.200</th><th>358.173</th><th>387.200</th><th>389.150</th><th>502.233</th><th>504.278</th><th>550.791*2</th><th>559.802*2</th><th>697.429</th><th>730.442</th><th>845.473</th><th>958.560</th><th>1118.585</th> </tr> </thead> <tbody> <tr> <td>Frac. Inten. (% of TIC)</td> <td>0.11</td><td>22.37</td><td>1.28</td><td>7.13</td><td>1.03</td><td>1.38</td><td>1.01</td><td>4.19</td><td>2.44</td><td>1.72</td><td>9.25</td><td>1.25</td><td>1.37</td><td>1.15</td><td>1.41</td><td>2.70</td><td>2.54</td><td>5.19</td><td>0.99</td><td>4.77</td><td>1.10</td><td>2.98</td><td>7.28</td><td>12.15</td><td>3.24</td> </tr> <tr> <td>Rel. Inten. (% of BP)</td> <td>0.48</td><td>100.00</td><td>5.70</td><td>31.86</td><td>4.61</td><td>6.16</td><td>4.50</td><td>18.72</td><td>10.90</td><td>7.68</td><td>41.37</td><td>5.58</td><td>6.13</td><td>5.14</td><td>6.29</td><td>12.06</td><td>11.36</td><td>23.20</td><td>4.43</td><td>21.30</td><td>4.91</td><td>13.30</td><td>32.53</td><td>54.31</td><td>14.50</td> </tr> <tr> <td>Score</td> <td>0.50</td><td>0.50</td><td>-0.06</td><td>-0.32</td><td>-0.05</td><td>-0.06</td><td>-0.04</td><td>0.50</td><td>-0.11</td><td>1.50</td><td>0.75</td><td>-0.06</td><td>0.75</td><td>0.75</td><td>0.50</td><td>0.75</td><td>0.75</td><td>1.50</td><td>0.50</td><td>1.50</td><td>0.75</td><td>1.50</td><td>1.50</td><td>1.50</td><td>1.50</td> </tr> <tr> <td>Ion-type</td> <td>KQ</td><td>a1</td><td></td><td></td><td></td><td></td><td></td><td>a2</td><td></td><td>y2</td><td>b2</td><td></td><td>DIL</td><td>kD</td><td>b3</td><td>CLD</td><td>b4</td><td>y3</td><td>y8+H2O+2</td><td>y8+2</td><td>LDILK</td><td>y5</td><td>y6</td><td>y7</td><td>y8</td> </tr> <tr> <td>Delta ppm</td> <td>0.3</td><td>-16.5</td><td>0.50</td><td></td><td></td><td></td><td></td><td>-8.4</td><td></td><td>3.3</td><td>-1.0</td><td></td><td>-11.2</td><td>-1.1</td><td>-18.7</td><td>-0.3</td><td>-3.2</td><td>0.5</td><td>-2.7</td><td>7.4</td><td>5.9</td><td>-5.3</td><td>0.6</td><td>3.5</td><td>-2.0</td> </tr> <tr> <td></td> <td></td><td></td><td></td><td></td><td></td><td></td><td></td><td>CL-28</td><td></td><td></td><td>CL</td><td></td><td></td><td></td><td></td><td></td><td>CLDI</td><td></td><td></td><td></td><td></td><td></td><td></td><td></td><td></td><td></td> </tr> <tr> <td></td> <td></td><td></td><td></td><td></td><td></td><td></td><td></td><td>-8.4</td><td></td><td></td><td>-1.0</td><td></td><td></td><td></td><td></td><td></td><td>-3.2</td><td></td><td></td><td></td><td></td><td></td><td></td><td></td><td></td><td></td> </tr> </tbody> </table> |        |         |        |                  |                |                 |                                 |                            |                             |                    |         |             |                   |                                                                      | Fragment-ion (m/z) | 84.081  | 86.096  | 87.099  | 131.117   | 133.041   | 157.133 | 229.109 | 246.126 | 257.096 | 262.141  | 274.123 | 296.198 | 342.200 | 358.173 | 387.200 | 389.150 | 502.233 | 504.278 | 550.791*2 | 559.802*2 | 697.429 | 730.442 | 845.473 | 958.560 | 1118.585 | Frac. Inten. (% of TIC) | 0.11 | 22.37 | 1.28 | 7.13 | 1.03 | 1.38 | 1.01 | 4.19 | 2.44 | 1.72 | 9.25 | 1.25 | 1.37 | 1.15 | 1.41 | 2.70 | 2.54 | 5.19 | 0.99 | 4.77 | 1.10 | 2.98 | 7.28 | 12.15 | 3.24 | Rel. Inten. (% of BP) | 0.48 | 100.00 | 5.70 | 31.86 | 4.61 | 6.16 | 4.50 | 18.72 | 10.90 | 7.68 | 41.37 | 5.58 | 6.13 | 5.14 | 6.29 | 12.06 | 11.36 | 23.20 | 4.43 | 21.30 | 4.91 | 13.30 | 32.53 | 54.31 | 14.50 | Score | 0.50 | 0.50 | -0.06 | -0.32 | -0.05 | -0.06 | -0.04 | 0.50 | -0.11 | 1.50 | 0.75 | -0.06 | 0.75 | 0.75 | 0.50 | 0.75 | 0.75 | 1.50 | 0.50 | 1.50 | 0.75 | 1.50 | 1.50 | 1.50 | 1.50 | Ion-type | KQ | a1 |  |  |  |  |  | a2 |  | y2 | b2 |  | DIL | kD | b3 | CLD | b4 | y3 | y8+H2O+2 | y8+2 | LDILK | y5 | y6 | y7 | y8 | Delta ppm | 0.3 | -16.5 | 0.50 |  |  |  |  | -8.4 |  | 3.3 | -1.0 |  | -11.2 | -1.1 | -18.7 | -0.3 | -3.2 | 0.5 | -2.7 | 7.4 | 5.9 | -5.3 | 0.6 | 3.5 | -2.0 |  |  |  |  |  |  |  |  | CL-28 |  |  | CL |  |  |  |  |  | CLDI |  |  |  |  |  |  |  |  |  |  |  |  |  |  |  |  |  | -8.4 |  |  | -1.0 |  |  |  |  |  | -3.2 |  |  |  |  |  |  |  |  |  |
| Fragment-ion (m/z)                                                                                                                                                                                                                                                                                                                                                                                                                                                                                                                                                                                                                                                                                                                                                                                                                                                                                                                                                                                                                                                                                                                                                                                                                                                                                                                                                                                                                                                                                                                                                                                                                                                                                                                                                                                                                                                                                                                                                                                                                                                                                                                                                                                                                                                                                                                                                                                                                                                                                                                                                                                                                                                                                                                                                                                                                                                                              | 84.081 | 86.096  | 87.099 | 131.117          | 133.041        | 157.133         | 229.109                         | 246.126                    | 257.096                     | 262.141            | 274.123 | 296.198     | 342.200           | 358.173                                                              | 387.200            | 389.150 | 502.233 | 504.278 | 550.791*2 | 559.802*2 | 697.429 | 730.442 | 845.473 | 958.560 | 1118.585 |         |         |         |         |         |         |         |         |           |           |         |         |         |         |          |                         |      |       |      |      |      |      |      |      |      |      |      |      |      |      |      |      |      |      |      |      |      |      |      |       |      |                       |      |        |      |       |      |      |      |       |       |      |       |      |      |      |      |       |       |       |      |       |      |       |       |       |       |       |      |      |       |       |       |       |       |      |       |      |      |       |      |      |      |      |      |      |      |      |      |      |      |      |      |          |    |    |  |  |  |  |  |    |  |    |    |  |     |    |    |     |    |    |          |      |       |    |    |    |    |           |     |       |      |  |  |  |  |      |  |     |      |  |       |      |       |      |      |     |      |     |     |      |     |     |      |  |  |  |  |  |  |  |  |       |  |  |    |  |  |  |  |  |      |  |  |  |  |  |  |  |  |  |  |  |  |  |  |  |  |  |      |  |  |      |  |  |  |  |  |      |  |  |  |  |  |  |  |  |  |
| Frac. Inten. (% of TIC)                                                                                                                                                                                                                                                                                                                                                                                                                                                                                                                                                                                                                                                                                                                                                                                                                                                                                                                                                                                                                                                                                                                                                                                                                                                                                                                                                                                                                                                                                                                                                                                                                                                                                                                                                                                                                                                                                                                                                                                                                                                                                                                                                                                                                                                                                                                                                                                                                                                                                                                                                                                                                                                                                                                                                                                                                                                                         | 0.11   | 22.37   | 1.28   | 7.13             | 1.03           | 1.38            | 1.01                            | 4.19                       | 2.44                        | 1.72               | 9.25    | 1.25        | 1.37              | 1.15                                                                 | 1.41               | 2.70    | 2.54    | 5.19    | 0.99      | 4.77      | 1.10    | 2.98    | 7.28    | 12.15   | 3.24     |         |         |         |         |         |         |         |         |           |           |         |         |         |         |          |                         |      |       |      |      |      |      |      |      |      |      |      |      |      |      |      |      |      |      |      |      |      |      |      |       |      |                       |      |        |      |       |      |      |      |       |       |      |       |      |      |      |      |       |       |       |      |       |      |       |       |       |       |       |      |      |       |       |       |       |       |      |       |      |      |       |      |      |      |      |      |      |      |      |      |      |      |      |      |          |    |    |  |  |  |  |  |    |  |    |    |  |     |    |    |     |    |    |          |      |       |    |    |    |    |           |     |       |      |  |  |  |  |      |  |     |      |  |       |      |       |      |      |     |      |     |     |      |     |     |      |  |  |  |  |  |  |  |  |       |  |  |    |  |  |  |  |  |      |  |  |  |  |  |  |  |  |  |  |  |  |  |  |  |  |  |      |  |  |      |  |  |  |  |  |      |  |  |  |  |  |  |  |  |  |
| Rel. Inten. (% of BP)                                                                                                                                                                                                                                                                                                                                                                                                                                                                                                                                                                                                                                                                                                                                                                                                                                                                                                                                                                                                                                                                                                                                                                                                                                                                                                                                                                                                                                                                                                                                                                                                                                                                                                                                                                                                                                                                                                                                                                                                                                                                                                                                                                                                                                                                                                                                                                                                                                                                                                                                                                                                                                                                                                                                                                                                                                                                           | 0.48   | 100.00  | 5.70   | 31.86            | 4.61           | 6.16            | 4.50                            | 18.72                      | 10.90                       | 7.68               | 41.37   | 5.58        | 6.13              | 5.14                                                                 | 6.29               | 12.06   | 11.36   | 23.20   | 4.43      | 21.30     | 4.91    | 13.30   | 32.53   | 54.31   | 14.50    |         |         |         |         |         |         |         |         |           |           |         |         |         |         |          |                         |      |       |      |      |      |      |      |      |      |      |      |      |      |      |      |      |      |      |      |      |      |      |      |       |      |                       |      |        |      |       |      |      |      |       |       |      |       |      |      |      |      |       |       |       |      |       |      |       |       |       |       |       |      |      |       |       |       |       |       |      |       |      |      |       |      |      |      |      |      |      |      |      |      |      |      |      |      |          |    |    |  |  |  |  |  |    |  |    |    |  |     |    |    |     |    |    |          |      |       |    |    |    |    |           |     |       |      |  |  |  |  |      |  |     |      |  |       |      |       |      |      |     |      |     |     |      |     |     |      |  |  |  |  |  |  |  |  |       |  |  |    |  |  |  |  |  |      |  |  |  |  |  |  |  |  |  |  |  |  |  |  |  |  |  |      |  |  |      |  |  |  |  |  |      |  |  |  |  |  |  |  |  |  |
| Score                                                                                                                                                                                                                                                                                                                                                                                                                                                                                                                                                                                                                                                                                                                                                                                                                                                                                                                                                                                                                                                                                                                                                                                                                                                                                                                                                                                                                                                                                                                                                                                                                                                                                                                                                                                                                                                                                                                                                                                                                                                                                                                                                                                                                                                                                                                                                                                                                                                                                                                                                                                                                                                                                                                                                                                                                                                                                           | 0.50   | 0.50    | -0.06  | -0.32            | -0.05          | -0.06           | -0.04                           | 0.50                       | -0.11                       | 1.50               | 0.75    | -0.06       | 0.75              | 0.75                                                                 | 0.50               | 0.75    | 0.75    | 1.50    | 0.50      | 1.50      | 0.75    | 1.50    | 1.50    | 1.50    | 1.50     |         |         |         |         |         |         |         |         |           |           |         |         |         |         |          |                         |      |       |      |      |      |      |      |      |      |      |      |      |      |      |      |      |      |      |      |      |      |      |      |       |      |                       |      |        |      |       |      |      |      |       |       |      |       |      |      |      |      |       |       |       |      |       |      |       |       |       |       |       |      |      |       |       |       |       |       |      |       |      |      |       |      |      |      |      |      |      |      |      |      |      |      |      |      |          |    |    |  |  |  |  |  |    |  |    |    |  |     |    |    |     |    |    |          |      |       |    |    |    |    |           |     |       |      |  |  |  |  |      |  |     |      |  |       |      |       |      |      |     |      |     |     |      |     |     |      |  |  |  |  |  |  |  |  |       |  |  |    |  |  |  |  |  |      |  |  |  |  |  |  |  |  |  |  |  |  |  |  |  |  |  |      |  |  |      |  |  |  |  |  |      |  |  |  |  |  |  |  |  |  |
| Ion-type                                                                                                                                                                                                                                                                                                                                                                                                                                                                                                                                                                                                                                                                                                                                                                                                                                                                                                                                                                                                                                                                                                                                                                                                                                                                                                                                                                                                                                                                                                                                                                                                                                                                                                                                                                                                                                                                                                                                                                                                                                                                                                                                                                                                                                                                                                                                                                                                                                                                                                                                                                                                                                                                                                                                                                                                                                                                                        | KQ     | a1      |        |                  |                |                 |                                 | a2                         |                             | y2                 | b2      |             | DIL               | kD                                                                   | b3                 | CLD     | b4      | y3      | y8+H2O+2  | y8+2      | LDILK   | y5      | y6      | y7      | y8       |         |         |         |         |         |         |         |         |           |           |         |         |         |         |          |                         |      |       |      |      |      |      |      |      |      |      |      |      |      |      |      |      |      |      |      |      |      |      |      |       |      |                       |      |        |      |       |      |      |      |       |       |      |       |      |      |      |      |       |       |       |      |       |      |       |       |       |       |       |      |      |       |       |       |       |       |      |       |      |      |       |      |      |      |      |      |      |      |      |      |      |      |      |      |          |    |    |  |  |  |  |  |    |  |    |    |  |     |    |    |     |    |    |          |      |       |    |    |    |    |           |     |       |      |  |  |  |  |      |  |     |      |  |       |      |       |      |      |     |      |     |     |      |     |     |      |  |  |  |  |  |  |  |  |       |  |  |    |  |  |  |  |  |      |  |  |  |  |  |  |  |  |  |  |  |  |  |  |  |  |  |      |  |  |      |  |  |  |  |  |      |  |  |  |  |  |  |  |  |  |
| Delta ppm                                                                                                                                                                                                                                                                                                                                                                                                                                                                                                                                                                                                                                                                                                                                                                                                                                                                                                                                                                                                                                                                                                                                                                                                                                                                                                                                                                                                                                                                                                                                                                                                                                                                                                                                                                                                                                                                                                                                                                                                                                                                                                                                                                                                                                                                                                                                                                                                                                                                                                                                                                                                                                                                                                                                                                                                                                                                                       | 0.3    | -16.5   | 0.50   |                  |                |                 |                                 | -8.4                       |                             | 3.3                | -1.0    |             | -11.2             | -1.1                                                                 | -18.7              | -0.3    | -3.2    | 0.5     | -2.7      | 7.4       | 5.9     | -5.3    | 0.6     | 3.5     | -2.0     |         |         |         |         |         |         |         |         |           |           |         |         |         |         |          |                         |      |       |      |      |      |      |      |      |      |      |      |      |      |      |      |      |      |      |      |      |      |      |      |       |      |                       |      |        |      |       |      |      |      |       |       |      |       |      |      |      |      |       |       |       |      |       |      |       |       |       |       |       |      |      |       |       |       |       |       |      |       |      |      |       |      |      |      |      |      |      |      |      |      |      |      |      |      |          |    |    |  |  |  |  |  |    |  |    |    |  |     |    |    |     |    |    |          |      |       |    |    |    |    |           |     |       |      |  |  |  |  |      |  |     |      |  |       |      |       |      |      |     |      |     |     |      |     |     |      |  |  |  |  |  |  |  |  |       |  |  |    |  |  |  |  |  |      |  |  |  |  |  |  |  |  |  |  |  |  |  |  |  |  |  |      |  |  |      |  |  |  |  |  |      |  |  |  |  |  |  |  |  |  |
|                                                                                                                                                                                                                                                                                                                                                                                                                                                                                                                                                                                                                                                                                                                                                                                                                                                                                                                                                                                                                                                                                                                                                                                                                                                                                                                                                                                                                                                                                                                                                                                                                                                                                                                                                                                                                                                                                                                                                                                                                                                                                                                                                                                                                                                                                                                                                                                                                                                                                                                                                                                                                                                                                                                                                                                                                                                                                                 |        |         |        |                  |                |                 |                                 | CL-28                      |                             |                    | CL      |             |                   |                                                                      |                    |         | CLDI    |         |           |           |         |         |         |         |          |         |         |         |         |         |         |         |         |           |           |         |         |         |         |          |                         |      |       |      |      |      |      |      |      |      |      |      |      |      |      |      |      |      |      |      |      |      |      |      |       |      |                       |      |        |      |       |      |      |      |       |       |      |       |      |      |      |      |       |       |       |      |       |      |       |       |       |       |       |      |      |       |       |       |       |       |      |       |      |      |       |      |      |      |      |      |      |      |      |      |      |      |      |      |          |    |    |  |  |  |  |  |    |  |    |    |  |     |    |    |     |    |    |          |      |       |    |    |    |    |           |     |       |      |  |  |  |  |      |  |     |      |  |       |      |       |      |      |     |      |     |     |      |     |     |      |  |  |  |  |  |  |  |  |       |  |  |    |  |  |  |  |  |      |  |  |  |  |  |  |  |  |  |  |  |  |  |  |  |  |  |      |  |  |      |  |  |  |  |  |      |  |  |  |  |  |  |  |  |  |
|                                                                                                                                                                                                                                                                                                                                                                                                                                                                                                                                                                                                                                                                                                                                                                                                                                                                                                                                                                                                                                                                                                                                                                                                                                                                                                                                                                                                                                                                                                                                                                                                                                                                                                                                                                                                                                                                                                                                                                                                                                                                                                                                                                                                                                                                                                                                                                                                                                                                                                                                                                                                                                                                                                                                                                                                                                                                                                 |        |         |        |                  |                |                 |                                 | -8.4                       |                             |                    | -1.0    |             |                   |                                                                      |                    |         | -3.2    |         |           |           |         |         |         |         |          |         |         |         |         |         |         |         |         |           |           |         |         |         |         |          |                         |      |       |      |      |      |      |      |      |      |      |      |      |      |      |      |      |      |      |      |      |      |      |      |       |      |                       |      |        |      |       |      |      |      |       |       |      |       |      |      |      |      |       |       |       |      |       |      |       |       |       |       |       |      |      |       |       |       |       |       |      |       |      |      |       |      |      |      |      |      |      |      |      |      |      |      |      |      |          |    |    |  |  |  |  |  |    |  |    |    |  |     |    |    |     |    |    |          |      |       |    |    |    |    |           |     |       |      |  |  |  |  |      |  |     |      |  |       |      |       |      |      |     |      |     |     |      |     |     |      |  |  |  |  |  |  |  |  |       |  |  |    |  |  |  |  |  |      |  |  |  |  |  |  |  |  |  |  |  |  |  |  |  |  |  |      |  |  |      |  |  |  |  |  |      |  |  |  |  |  |  |  |  |  |

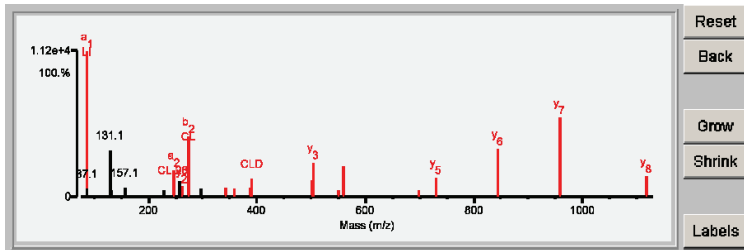

Result Summary

| Rank | Score | SPI (%) | BCS | # Unmatched Ions | Variable sites | Sequence           | MH <sup>+</sup> Calculated (Da) | MH <sup>+</sup> Error (Da) | MH <sup>+</sup> Error (ppm) | Protein MW/pl (Da) | Species | Accession # | Protein Name                                                         |
|------|-------|---------|-----|------------------|----------------|--------------------|---------------------------------|----------------------------|-----------------------------|--------------------|---------|-------------|----------------------------------------------------------------------|
| 1    | 13.22 | 70.6    | 5   | 7/25             | K132k          | (R)VQWYPEGVQHVX(E) | 1597.8485                       | 114.0528                   | 5.8                         | 141294.2/5.01      | HUMAN   | Q9C0C9      | Ubiquitin-conjugating enzyme E2 O OS=Homo sapiens GN=UBE2O PE=1 SV=3 |

Detailed Results

| Rank | Score | SPI (%) | BCS | # Unmatched Ions | Variable sites | Sequence           | MH <sup>+</sup> Calculated (Da) | MH <sup>+</sup> Error (Da) | MH <sup>+</sup> Error (ppm) | Protein MW/pl (Da) | Species | Accession # | MS-Digest Index # | Protein Name                                                         |
|------|-------|---------|-----|------------------|----------------|--------------------|---------------------------------|----------------------------|-----------------------------|--------------------|---------|-------------|-------------------|----------------------------------------------------------------------|
| 1    | 13.22 | 70.6    | 5   | 7/25             | K132k          | (R)VQWYPEGVQHVX(E) | 1597.8485                       | 114.0528                   | 5.8                         | 141294.2/5.01      | HUMAN   | Q9C0C9      | 812603            | Ubiquitin-conjugating enzyme E2 O OS=Homo sapiens GN=UBE2O PE=1 SV=3 |

  

| Fragment-ion (m/z)      | 70.064 | 71.068 | 72.081 | 84.046 | 84.081 | 86.095 | 102.053 | 110.072 | 117.102 | 129.101 | 130.082 | 136.075 | 147.110 | 159.091 | 199.108 | 227.101 | 228.134 | 248.108 | 249.100 | 305.128 | 322.160 | 383.245 | 414.220 | 455.266 <sup>+2</sup> | 511.292 <sup>+2</sup> |
|-------------------------|--------|--------|--------|--------|--------|--------|---------|---------|---------|---------|---------|---------|---------|---------|---------|---------|---------|---------|---------|---------|---------|---------|---------|-----------------------|-----------------------|
| Frac. Inten. (% of TIC) | 0.03   | 3.68   | 1.37   | 0.13   | 0.73   | 10.00  | 0.16    | 0.16    | 7.44    | 0.33    | 6.91    | 0.38    | 3.48    | 0.25    | 3.63    | 4.34    | 11.12   | 7.37    | 5.67    | 4.43    | 3.82    | 5.05    | 8.35    | 5.88                  | 5.28                  |
| Rel. Inten. (% of BP)   | 0.31   | 33.11  | 12.34  | 1.14   | 6.54   | 89.94  | 1.47    | 1.46    | 66.92   | 2.93    | 62.17   | 3.43    | 31.33   | 2.29    | 32.67   | 39.04   | 100.00  | 66.32   | 51.02   | 39.86   | 34.40   | 45.47   | 75.15   | 52.88                 | 47.48                 |
| Score                   | 0.20   | -0.08  | 0.50   |        | 0.50   | -0.22  | 1.00    | 1.00    | -0.16   | 0.20    | 0.50    | 1.00    | 1.50    | 2.00    | 0.50    | 0.75    | 0.50    | -0.16   | -0.12   | -0.10   | -0.08   | 1.50    | 0.50    | 1.50                  | 0.50                  |
| Ion-type                | PR     |        | a1     | E      | KQ     |        | E       | H       |         | RKQ     | y1-NH3  | Y       | y1      | W       | PE-28   | PE      | b2      |         |         |         |         | y3      | b3      | y7 <sup>+2</sup>      | y8-NH3 <sup>+2</sup>  |
| Delta ppm               | -8.9   |        | -14.9  |        | -0.9   |        | -15.2   | 10.2    |         | -8.8    | -30.4   | -5.1    | -20.4   | -1.7    | -5.1    | -12.5   | -7.3    |         |         |         |         | 13.0    | 12.4    | -2.6                  | 33.5                  |

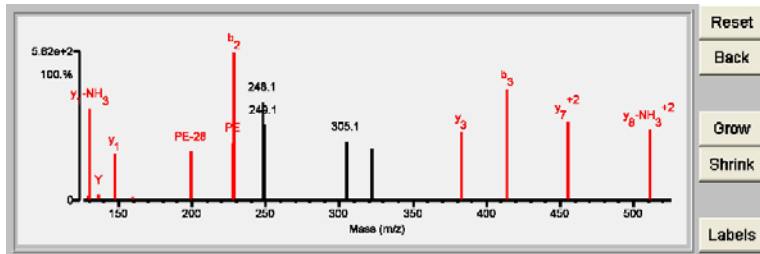

Reset

Back

Grow

Shrink

Labels

Result Summary

| Rank | Score | SPI (%) | BCS | # Unmatched Ions | Variable sites | Sequence                                                                       | MH <sup>+</sup> Calculated (Da) | MH <sup>+</sup> Error (Da) | MH <sup>+</sup> Error (ppm) | Protein MW/pI (Da) | Species | Accession # | Protein Name                                                         |
|------|-------|---------|-----|------------------|----------------|--------------------------------------------------------------------------------|---------------------------------|----------------------------|-----------------------------|--------------------|---------|-------------|----------------------------------------------------------------------|
| 1    | 20.86 | 87.6    | 13  | 5/25             | K825k          | (K)I L E S L K N M T V E Q L L T / G / S / P T S / P T V E / P E K / P T R (E) | 3295.7454                       | 114.0696                   | 7.8                         | 141294.2/5.01      | HUMAN   | Q9C0C9      | Ubiquitin-conjugating enzyme E2 O OS=Homo sapiens GN=UBE2O PE=1 SV=3 |

Detailed Results

| Rank | Score | SPI (%) | BCS | # Unmatched Ions | Variable sites | Sequence                                                                        | MH <sup>+</sup> Calculated (Da) | MH <sup>+</sup> Error (Da) | MH <sup>+</sup> Error (ppm) | Protein MW/pI (Da) | Species | Accession # | MS-Digest Index # | Protein Name                                                         |
|------|-------|---------|-----|------------------|----------------|---------------------------------------------------------------------------------|---------------------------------|----------------------------|-----------------------------|--------------------|---------|-------------|-------------------|----------------------------------------------------------------------|
| 1    | 20.86 | 87.6    | 13  | 5/25             | K825k          | (K) I L E S L K N M T V E Q L L T / G / S / P T S / P T V E / P E K / P T R (E) | 3295.7454                       | 114.0696                   | 7.8                         | 141294.2/5.01      | HUMAN   | Q9C0C9      | 812603            | Ubiquitin-conjugating enzyme E2 O OS=Homo sapiens GN=UBE2O PE=1 SV=3 |

  

| Fragment-ion (m/z)     | 70.064 | 86.096 | 199.177 | 227.171 | 243.147 | 319.136 | 355.193 | 371.185 | 373.224 | 443.253 | 719.886 <sup>+2</sup> | 727.406 | 750.894 <sup>+2</sup> | 763.399 <sup>+2</sup> | 791.904 <sup>+2</sup> | 807.412 <sup>+2</sup> | 808.023 | 820.399 | 842.438 | 889.993 | 898.968 <sup>+2</sup> | 955.518 <sup>+2</sup> | 1019.522 | 1153.609 | 1240.648 |
|------------------------|--------|--------|---------|---------|---------|---------|---------|---------|---------|---------|-----------------------|---------|-----------------------|-----------------------|-----------------------|-----------------------|---------|---------|---------|---------|-----------------------|-----------------------|----------|----------|----------|
| Frac. Inten.(% of TIC) | 0.00   | 4.60   | 3.61    | 2.35    | 2.28    | 1.86    | 2.79    | 2.26    | 3.70    | 1.93    | 9.34                  | 4.94    | 2.90                  | 5.26                  | 14.70                 | 3.10                  | 2.15    | 2.18    | 3.92    | 3.89    | 7.02                  | 5.09                  | 2.17     | 5.82     | 2.14     |
| Rel. Inten.(% of BP)   | 0.03   | 31.30  | 24.57   | 16.00   | 15.51   | 12.66   | 18.98   | 15.35   | 25.16   | 13.12   | 63.50                 | 33.61   | 19.70                 | 35.80                 | 100.00                | 21.09                 | 14.61   | 14.85   | 26.65   | 26.46   | 47.73                 | 34.62                 | 14.73    | 39.58    | 14.55    |
| Score                  | 0.20   | 0.50   | 0.50    | 0.75    | -0.16   | -0.13   | 0.75    | 0.75    | 1.50    | 0.75    | 1.50                  | 1.50    | 0.50                  | 1.50                  | 1.50                  | 0.50                  | -0.15   | -0.15   | 1.50    | -0.26   | 1.50                  | 1.50                  | 1.50     | 1.50     | 1.50     |
| Ion-type               | PR     | a1     | a2      | b2      |         |         | EKP     | EQL     | y3      | b4      | y13 <sup>+2</sup>     | y6      | b12 <sup>+2</sup>     | y14 <sup>+2</sup>     | y15 <sup>+2</sup>     | b13 <sup>+2</sup>     |         |         | y**16   |         | y17 <sup>+2</sup>     | y18 <sup>+2</sup>     | y**19    | y10      | y11      |
| Delta ppm              | -8.9   | -15.4  | -21.5   | -26.4   | -26.4   |         | -17.2   | -22.4   | 11.0    | 4.7     | 7.2                   | -4.7    | 4.0                   | 3.1                   | -4.4                  | -26.1                 |         |         | 8.7     |         | -16.4                 | -0.0                  | -22.0    | -10.2    | -4.3     |

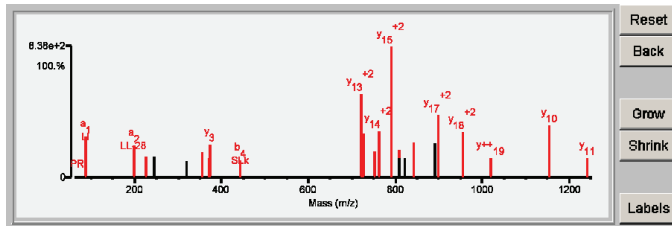



Result Summary

| Rank | Score | SPI (%) | BCS | # Unmatched ions | # Variable sites | Sequence               | MH <sup>+</sup> Calculated (Da) | MH <sup>+</sup> Error (Da) | MH <sup>+</sup> Error (ppm) | Protein MW/pI (Da) | Species | Accession # | Protein Name                                                          |
|------|-------|---------|-----|------------------|------------------|------------------------|---------------------------------|----------------------------|-----------------------------|--------------------|---------|-------------|-----------------------------------------------------------------------|
| 1    | 16.49 | 83.4    | 8   | 6/25             | K63k             | (R) LKFPIDYPYSPPAFR(F) | 1810.9527                       | 114.0486                   | 2.9                         | 26736.9/4.41       | HUMAN   | P49427      | Ubiquitin-conjugating enzyme E2 R1 OS=Homo sapiens GN=CDC34 PE=1 SV=2 |

Detailed Results

| Rank                    | Score  | SPI (%) | BCS    | # Unmatched ions | # Variable sites | Sequence               | MH <sup>+</sup> Calculated (Da) | MH <sup>+</sup> Error (Da) | MH <sup>+</sup> Error (ppm) | Protein MW/pI (Da) | Species | Accession # | MS-Digest Index #     | Protein Name                                                          |         |                       |         |                       |         |         |         |         |         |         |         |
|-------------------------|--------|---------|--------|------------------|------------------|------------------------|---------------------------------|----------------------------|-----------------------------|--------------------|---------|-------------|-----------------------|-----------------------------------------------------------------------|---------|-----------------------|---------|-----------------------|---------|---------|---------|---------|---------|---------|---------|
| 1                       | 16.49  | 83.4    | 8      | 6/25             | K63k             | (R) LKFPIDYPYSPPAFR(F) | 1810.9527                       | 114.0486                   | 2.9                         | 26736.9/4.41       | HUMAN   | P49427      | 812035                | Ubiquitin-conjugating enzyme E2 R1 OS=Homo sapiens GN=CDC34 PE=1 SV=2 |         |                       |         |                       |         |         |         |         |         |         |         |
| Fragment-ion (m/z)      | 70.066 | 72.082  | 84.044 | 86.096           | 115.085          | 120.081                | 136.074                         | 141.102                    | 175.120                     | 233.133            | 261.127 | 326.167     | 328.678 <sup>+2</sup> | 348.162                                                               | 356.225 | 405.181 <sup>+2</sup> | 467.742 | 473.243 <sup>+2</sup> | 490.273 | 587.329 | 674.361 | 828.468 | 837.433 | 934.468 | 991.525 |
| Frac. Inten. (% of TIC) | 0.02   | 3.94    | 2.99   | 10.11            | 2.68             | 0.16                   | 0.34                            | 2.46                       | 3.01                        | 2.23               | 2.89    | 2.22        | 3.29                  | 2.98                                                                  | 2.49    | 2.29                  | 5.60    | 2.26                  | 2.85    | 11.40   | 9.33    | 3.07    | 6.78    | 7.81    | 6.83    |
| Rel. Inten. (% of BP)   | 0.14   | 34.57   | 26.23  | 88.74            | 23.56            | 1.44                   | 2.96                            | 21.59                      | 26.38                       | 19.56              | 25.36   | 19.48       | 28.87                 | 26.14                                                                 | 21.83   | 20.08                 | 49.10   | 19.81                 | 24.97   | 100.00  | 81.84   | 26.98   | 59.46   | 68.52   | 59.92   |
| Score                   | 0.20   | -0.35   | -0.26  | 0.50             | -0.24            | 1.00                   | 1.00                            | -0.22                      | 1.50                        | 0.50               | 0.75    | 0.75        | 0.50                  | 0.75                                                                  | 0.50    | -0.20                 | 1.50    | -0.20                 | 1.50    | 1.50    | 1.50    | 0.50    | 1.50    | 1.50    | 0.50    |
| Ion-type                | PR     |         |        | a1               | F                | Y                      |                                 |                            | y1                          | PY-28              | PY      | PID         | y6-H2O <sup>+2</sup>  | YSP                                                                   | b2      |                       | y++8    |                       | y4      | y5      | y6      | b6      | y7      | y8      | b7      |
| Delta ppm               | 13.9   |         |        | -14.2            | 0.50             | -2.3                   | -10.2                           |                            | 8.3                         | 14.8               | 10.5    | -16.4       | -3.0                  | 15.5                                                                  | -15.0   |                       | -0.9    |                       | -9.3    | -2.1    | -1.5    | 7.0     | 9.5     | -10.3   | -0.7    |

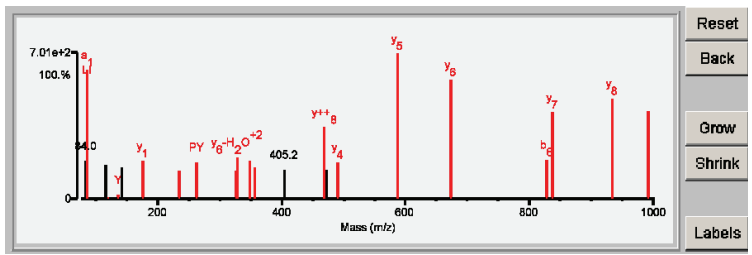

Reset  
Back  
Grow  
Shrink  
Labels

Result Summary

| Rank | Score | SPI (%) | BCS | # Unmatched Ions | # Variable sites | Sequence                            | MH <sup>+</sup> Calculated (Da) | MH <sup>+</sup> Error (Da) | MH <sup>+</sup> Error (ppm) | Protein MW (Da) | Species | Accession # | Protein Name                                                         |
|------|-------|---------|-----|------------------|------------------|-------------------------------------|---------------------------------|----------------------------|-----------------------------|-----------------|---------|-------------|----------------------------------------------------------------------|
| 1    | 22.21 | 81.5    | 12  | 4/25             | K197k            | (R)ALASGTEASSTDPGAPGGPGGAEQPMakK(H) | 2569.2199                       | 114.0743                   | 11.7                        | 23845.4/8.46    | HUMAN   | Q16763      | Ubiquitin-conjugating enzyme E2 S OS=Homo sapiens GN=UBE2S PE=1 SV=2 |
| 1    | 22.21 | 81.5    | 12  | 4/25             | K198k            | (R)ALASGTEASSTDPGAPGGPGGAEQPMakK(H) | 2569.2199                       | 114.0743                   | 11.7                        | 23845.4/8.46    | HUMAN   | Q16763      | Ubiquitin-conjugating enzyme E2 S OS=Homo sapiens GN=UBE2S PE=1 SV=2 |

Detailed Results

| Rank                    | Score | SPI (%) | BCS | # Unmatched Ions | # Variable sites | Sequence                                                                     | MH <sup>+</sup> Calculated (Da) | MH <sup>+</sup> Error (Da) | MH <sup>+</sup> Error (ppm) | Protein MW (Da) | Species | Accession # | MS-Digest Index # | Protein Name                                                         |                       |         |         |                   |                   |                       |                       |                       |                       |                        |                        |                        |                        |                        |                        |          |          |      |      |
|-------------------------|-------|---------|-----|------------------|------------------|------------------------------------------------------------------------------|---------------------------------|----------------------------|-----------------------------|-----------------|---------|-------------|-------------------|----------------------------------------------------------------------|-----------------------|---------|---------|-------------------|-------------------|-----------------------|-----------------------|-----------------------|-----------------------|------------------------|------------------------|------------------------|------------------------|------------------------|------------------------|----------|----------|------|------|
| 1                       | 22.21 | 81.5    | 12  | 4/25             | K197k            | (R)A L A I S I G T E A / S / S T D P G A P G G / P G G A E / G P M A K K (H) | 2569.2199                       | 114.0743                   | 11.7                        | 23845.4/8.46    | HUMAN   | Q16763      | 812611            | Ubiquitin-conjugating enzyme E2 S OS=Homo sapiens GN=UBE2S PE=1 SV=2 |                       |         |         |                   |                   |                       |                       |                       |                       |                        |                        |                        |                        |                        |                        |          |          |      |      |
| Fragment-Ion (m/z)      |       |         |     |                  |                  |                                                                              | 70.064                          | 86.096                     | 155.082                     | 157.133         | 185.128 | 256.166     | 343.200           | 678.793 <sup>+2</sup>                                                | 607.313 <sup>+2</sup> | 616.288 | 684.345 | 684.848           | 745.411           | 796.899 <sup>+2</sup> | 834.049 <sup>+3</sup> | 948.450 <sup>+2</sup> | 991.964 <sup>+2</sup> | 1027.504 <sup>+2</sup> | 1091.491 <sup>+2</sup> | 1142.525 <sup>+2</sup> | 1171.045 <sup>+2</sup> | 1214.549 <sup>+2</sup> | 1250.041 <sup>+2</sup> | 1316.601 | 1367.681 |      |      |
| Frac. Inten. (% of TIC) |       |         |     |                  |                  |                                                                              | 0.00                            | 0.05                       | 1.71                        | 5.43            | 6.87    | 2.19        | 1.42              | 3.88                                                                 | 1.32                  | 1.42    | 15.21   | 10.95             | 2.83              | 14.03                 | 2.56                  | 2.70                  | 3.74                  | 3.43                   | 3.54                   | 2.19                   | 3.24                   | 2.88                   | 2.30                   | 2.01     | 4.08     |      |      |
| Rel. Inten. (% of BP)   |       |         |     |                  |                  |                                                                              | 0.01                            | 0.34                       | 11.27                       | 35.69           | 45.14   | 14.42       | 9.34              | 25.48                                                                | 8.65                  | 9.36    | 100.00  | 71.98             | 18.62             | 92.23                 | 16.81                 | 17.72                 | 24.58                 | 22.57                  | 23.30                  | 14.40                  | 21.31                  | 18.91                  | 15.09                  | 13.24    | 26.84    |      |      |
| Score                   |       |         |     |                  |                  |                                                                              | 0.20                            | 0.22                       | 0.75                        | 0.50            | 0.75    | 0.50        | 0.50              | 1.50                                                                 | 1.50                  | -0.09   | 1.50    | 1.50              | -0.72             | 1.50                  | 1.50                  | 1.50                  | 1.50                  | 1.50                   | 1.50                   | 1.50                   | 1.50                   | 1.50                   | 1.50                   | 1.50     | 1.50     | 1.50 | 1.50 |
| Ion-type                |       |         |     |                  |                  |                                                                              | PR                              | LI                         | GP                          | 82              | b2      | b3          | b4                | y11 <sup>-2</sup>                                                    | y12 <sup>-2</sup>     | y**14   | y6      | y17 <sup>+2</sup> | y20 <sup>+2</sup> | y21 <sup>+2</sup>     | y22 <sup>+2</sup>     | y24 <sup>+2</sup>     | y25 <sup>+2</sup>     | y26 <sup>+2</sup>      | y27 <sup>+2</sup>      | b15                    | y14                    |                        |                        |          |          |      |      |
| Delta ppm               |       |         |     |                  |                  |                                                                              | -18.9                           | -2.6                       | -4.5                        | -12.3           | -7.8    | -1.8        | 2.3               | 0.7                                                                  | 16.8                  |         | 7.0     |                   | 11.6              |                       | 3.7                   |                       | 0.8                   | -1.7                   | 19.8                   |                        | 4.4                    |                        | -5.9                   | -27.2    | 2.9      | 5.4  |      |

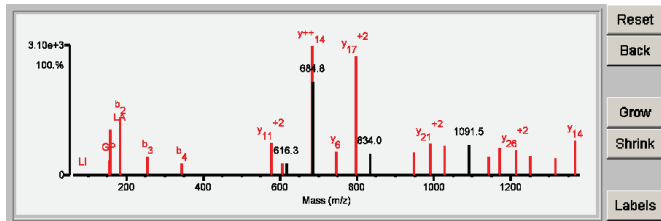

Result Summary

| Rank | Score | SPI (%) | BCS | # Unmatched Variable sites | Sequence                          | MH <sup>+</sup> Calculated (Da) | MH <sup>+</sup> Error (Da) | MH <sup>+</sup> Error (ppm) | Protein MW/pl (Da) | Species | Accession #             | Protein Name                                                                    |
|------|-------|---------|-----|----------------------------|-----------------------------------|---------------------------------|----------------------------|-----------------------------|--------------------|---------|-------------------------|---------------------------------------------------------------------------------|
| 1    | 20.22 | 93.3    | 9   | 3/25                       | K91k (R)I <b>CLDVLKLP</b> PK(G)   | 1295.7756                       | 114.0544                   | 8.1                         | 22521.07.78        | HUMAN   | <a href="#">Q9NPD8</a>  | Ubiquitin-conjugating enzyme E2 T OS=Homo sapiens GN=UBE2T PE=1 SV=1            |
| 2    | 4.68  | 52.5    | 2   | 16/25                      | K257k (R)Q <b>IVLCPGKPR</b> K(S)  | 1295.7616                       | 114.0683                   | 18.0                        | 36462.8/9.08       | HUMAN   | <a href="#">RQ5MJ70</a> | REVERSE Speedy protein A OS=Homo sapiens GN=SPDYA PE=1 SV=2                     |
| 3    | 4.57  | 56.3    | 2   | 17/25                      | None (R)C <b>LIRASLPVKPR</b> (A)  | 1409.8410                       | -0.0110                    | -7.8                        | 39945.6/5.50       | HUMAN   | <a href="#">Q02833</a>  | Ras association domain-containing protein 7 OS=Homo sapiens GN=RASSF7 PE=1 SV=1 |
| 4    | 3.57  | 56.3    | 1   | 17/25                      | None (-)M <b>AAALQVLPRLAR</b> (A) | 1409.8410                       | -0.0110                    | -7.8                        | 55252.9/6.25       | HUMAN   | <a href="#">Q8IVS8</a>  | Glycerate kinase OS=Homo sapiens GN=GLYCTK PE=2 SV=1                            |

Detailed Results

| Rank | Score | SPI (%) | BCS | # Unmatched Variable sites | Sequence                                                                      | MH <sup>+</sup> Calculated (Da) | MH <sup>+</sup> Error (Da) | MH <sup>+</sup> Error (ppm) | Protein MW/pl (Da) | Species | Accession #            | MS-Digest Index #      | Protein Name                                                         |
|------|-------|---------|-----|----------------------------|-------------------------------------------------------------------------------|---------------------------------|----------------------------|-----------------------------|--------------------|---------|------------------------|------------------------|----------------------------------------------------------------------|
| 1    | 20.22 | 93.3    | 9   | 3/25                       | K91k (R)I <b>C</b> I <b>L</b> D <b>V</b> L <b>K</b> L <b>P</b> P <b>K</b> (G) | 1295.7756                       | 114.0544                   | 8.1                         | 22521.07.78        | HUMAN   | <a href="#">Q9NPD8</a> | <a href="#">812617</a> | Ubiquitin-conjugating enzyme E2 T OS=Homo sapiens GN=UBE2T PE=1 SV=1 |

| Fragment-ion (m/z)     | 84.080 | 86.095 | 131.116 | 244.167 | 246.126 | 257.094 | 274.122 | 275.125 | 341.218 | 389.147 | 454.304 | 488.224 | 502.236 | 568.382 | 573.304  | 601.307 | 648.885 <sup>+2</sup> | 683.409 | 714.389 | 809.529 | 908.586 | 956.535 | 1023.621 | 1069.609 | 1136.701 |
|------------------------|--------|--------|---------|---------|---------|---------|---------|---------|---------|---------|---------|---------|---------|---------|----------|---------|-----------------------|---------|---------|---------|---------|---------|----------|----------|----------|
| Frac. Inten.(% of TIC) | 0.07   | 10.07  | 3.08    | 3.03    | 3.13    | 1.91    | 8.96    | 1.68    | 23.86   | 1.79    | 3.47    | 2.45    | 1.52    | 1.26    | 1.27     | 2.69    | 4.34                  | 1.27    | 1.36    | 3.46    | 2.08    | 1.95    | 4.29     | 4.34     | 6.68     |
| Rel. Inten.(% of BP)   | 0.31   | 42.19  | 12.89   | 12.69   | 13.13   | 8.02    | 37.55   | 7.04    | 100.00  | 7.50    | 14.52   | 10.26   | 6.37    | 5.28    | 5.31     | 11.27   | 18.20                 | 5.30    | 5.71    | 14.50   | 8.70    | 8.17    | 17.96    | 18.16    | 28.00    |
| Score                  | 0.50   | 0.50   | -0.13   | 1.50    | 0.50    | -0.08   | 0.75    | -0.07   | 1.50    | 0.75    | 1.50    | 0.50    | 0.75    | 0.50    | 0.75     | 0.50    | 0.75                  | 1.50    | 0.50    | 1.50    | 0.50    | 0.50    | 1.50     | 1.50     | 1.50     |
| Ion-type               | KQ     | a1     |         | y2      | a2      |         | b2      |         | y3      |         | y4      | CLDV    | b4      | VLKL    | a5       | b5      | y10 <sup>+2</sup>     | DVLKL   | b6      | y6      | y7      | b7      | y8       | b8       | y9       |
| Delta ppm              | -9.2   | -24.7  |         | 7.1     | -10.0   |         | -2.9    |         | 0.2     |         | -7.8    | 3.3     | 12.0    | 2.8     | -0.9     | -5.7    | 7.1                   | -1.1    | 3.3     | 6.2     | -8.0    | 10.6    | 1.7      | 0.2      | -2.3     |
|                        |        | LI     |         |         | CL-28   |         | CL      |         |         |         |         |         |         |         | CLDVL-28 | CLDVL   |                       |         |         |         |         |         |          |          |          |
|                        |        | -11.9  |         |         | -10.0   |         | -2.9    |         |         |         |         |         |         |         |          | 7.1     | 21.8                  |         |         |         |         |         |          |          |          |

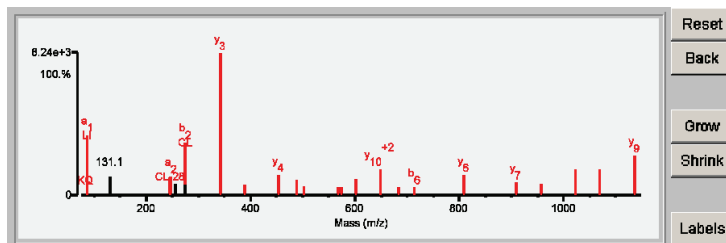

Result Summary

| Rank | Score | SPI (%) | BCS | # Unmatched Ions | Variable sites | Sequence                             | MH <sup>+</sup> Calculated (Da) | MH <sup>+</sup> Error (Da) | MH <sup>+</sup> Error (ppm) | Protein MW/pI (Da) | Species | Accession # | Protein Name                                                                  |
|------|-------|---------|-----|------------------|----------------|--------------------------------------|---------------------------------|----------------------------|-----------------------------|--------------------|---------|-------------|-------------------------------------------------------------------------------|
| 1    | 15.85 | 85.1    | 9   | 6/25             | K627k          | (K)GNVQVWVFLTESYSSSQDPPEKSIPICTLK(N) | 3433.7560                       | 114.0670                   | 6.8                         | 117849.6/5.49      | HUMAN   | P22314      | Ubiquitin-like modifier-activating enzyme 1 OS=Homo sapiens GN=UBA1 PE=1 SV=3 |
| 2    | 13.96 | 74.9    | 8   | 7/25             | K635k          | (K)GNVQVWVFLTESYSSSQDPPEKSIPICTLK(N) | 3433.7560                       | 114.0670                   | 6.8                         | 117849.6/5.49      | HUMAN   | P22314      | Ubiquitin-like modifier-activating enzyme 1 OS=Homo sapiens GN=UBA1 PE=1 SV=3 |

Detailed Results

| Rank                                                                                                                                                                                                                                                                                                                                                                                                                                                                                                                                                                                                                                                                                                                                                                                                                                                                                                                                                                                                                                                                                                                                                                                                                                                                                                                                                                                                                                                                                                                                                                                                                                                                                                                                                                                                                                                                                                                                                                                                                                                                                                                                                                                                                                                                                                                                                                                                                                                                                                                                                                                                                                                                                                                                                                                                                                                                                                                                                       | Score  | SPI (%) | BCS    | # Unmatched Ions | Variable sites                  | Sequence                             | MH <sup>+</sup> Calculated (Da) | MH <sup>+</sup> Error (Da)      | MH <sup>+</sup> Error (ppm) | Protein MW/pI (Da) | Species        | Accession #     | MS-Digest Index # | Protein Name                                                                  |                       |                 |                       |                                  |                       |                       |                 |                       |                        |                        |                        |         |         |         |         |                       |         |                       |                       |                       |                       |         |                       |                        |                        |                        |                         |      |      |      |      |      |      |      |      |      |      |      |      |      |       |       |      |      |      |      |      |      |      |      |      |      |      |                       |      |      |      |       |      |      |      |       |      |      |      |      |       |       |        |      |      |      |       |       |      |       |       |      |       |       |       |      |      |      |      |      |      |       |      |      |      |      |       |      |       |      |       |      |       |      |      |       |      |      |      |      |       |          |    |   |    |                |                                 |      |                |                                 |                |                |                |                 |                 |                 |                 |                 |                 |                                  |                 |                 |                 |                 |                 |                 |                 |           |       |       |      |       |     |       |  |      |     |      |      |  |      |      |  |  |       |  |      |      |  |      |     |  |       |
|------------------------------------------------------------------------------------------------------------------------------------------------------------------------------------------------------------------------------------------------------------------------------------------------------------------------------------------------------------------------------------------------------------------------------------------------------------------------------------------------------------------------------------------------------------------------------------------------------------------------------------------------------------------------------------------------------------------------------------------------------------------------------------------------------------------------------------------------------------------------------------------------------------------------------------------------------------------------------------------------------------------------------------------------------------------------------------------------------------------------------------------------------------------------------------------------------------------------------------------------------------------------------------------------------------------------------------------------------------------------------------------------------------------------------------------------------------------------------------------------------------------------------------------------------------------------------------------------------------------------------------------------------------------------------------------------------------------------------------------------------------------------------------------------------------------------------------------------------------------------------------------------------------------------------------------------------------------------------------------------------------------------------------------------------------------------------------------------------------------------------------------------------------------------------------------------------------------------------------------------------------------------------------------------------------------------------------------------------------------------------------------------------------------------------------------------------------------------------------------------------------------------------------------------------------------------------------------------------------------------------------------------------------------------------------------------------------------------------------------------------------------------------------------------------------------------------------------------------------------------------------------------------------------------------------------------------------|--------|---------|--------|------------------|---------------------------------|--------------------------------------|---------------------------------|---------------------------------|-----------------------------|--------------------|----------------|-----------------|-------------------|-------------------------------------------------------------------------------|-----------------------|-----------------|-----------------------|----------------------------------|-----------------------|-----------------------|-----------------|-----------------------|------------------------|------------------------|------------------------|---------|---------|---------|---------|-----------------------|---------|-----------------------|-----------------------|-----------------------|-----------------------|---------|-----------------------|------------------------|------------------------|------------------------|-------------------------|------|------|------|------|------|------|------|------|------|------|------|------|------|-------|-------|------|------|------|------|------|------|------|------|------|------|------|-----------------------|------|------|------|-------|------|------|------|-------|------|------|------|------|-------|-------|--------|------|------|------|-------|-------|------|-------|-------|------|-------|-------|-------|------|------|------|------|------|------|-------|------|------|------|------|-------|------|-------|------|-------|------|-------|------|------|-------|------|------|------|------|-------|----------|----|---|----|----------------|---------------------------------|------|----------------|---------------------------------|----------------|----------------|----------------|-----------------|-----------------|-----------------|-----------------|-----------------|-----------------|----------------------------------|-----------------|-----------------|-----------------|-----------------|-----------------|-----------------|-----------------|-----------|-------|-------|------|-------|-----|-------|--|------|-----|------|------|--|------|------|--|--|-------|--|------|------|--|------|-----|--|-------|
| 1                                                                                                                                                                                                                                                                                                                                                                                                                                                                                                                                                                                                                                                                                                                                                                                                                                                                                                                                                                                                                                                                                                                                                                                                                                                                                                                                                                                                                                                                                                                                                                                                                                                                                                                                                                                                                                                                                                                                                                                                                                                                                                                                                                                                                                                                                                                                                                                                                                                                                                                                                                                                                                                                                                                                                                                                                                                                                                                                                          | 15.85  | 85.1    | 9      | 6/25             | K627k                           | (K)GNVQVWVFLTESYSSSQDPPEKSIPICTLK(N) | 3433.7560                       | 114.0670                        | 6.8                         | 117849.6/5.49      | HUMAN          | P22314          | 406046            | Ubiquitin-like modifier-activating enzyme 1 OS=Homo sapiens GN=UBA1 PE=1 SV=3 |                       |                 |                       |                                  |                       |                       |                 |                       |                        |                        |                        |         |         |         |         |                       |         |                       |                       |                       |                       |         |                       |                        |                        |                        |                         |      |      |      |      |      |      |      |      |      |      |      |      |      |       |       |      |      |      |      |      |      |      |      |      |      |      |                       |      |      |      |       |      |      |      |       |      |      |      |      |       |       |        |      |      |      |       |       |      |       |       |      |       |       |       |      |      |      |      |      |      |       |      |      |      |      |       |      |       |      |       |      |       |      |      |       |      |      |      |      |       |          |    |   |    |                |                                 |      |                |                                 |                |                |                |                 |                 |                 |                 |                 |                 |                                  |                 |                 |                 |                 |                 |                 |                 |           |       |       |      |       |     |       |  |      |     |      |      |  |      |      |  |  |       |  |      |      |  |      |     |  |       |
| <table border="1"> <thead> <tr> <th>Fragment-Ion (m/z)</th> <th>70.064</th> <th>84.043</th> <th>86.096</th> <th>172.069</th> <th>382.174</th> <th>441.235</th> <th>454.203</th> <th>498.274</th> <th>580.310</th> <th>597.335</th> <th>675.332</th> <th>692.367</th> <th>710.415</th> <th>731.411</th> <th>748.907<sup>+2</sup></th> <th>896.955</th> <th>913.956<sup>+2</sup></th> <th>919.415<sup>+2</sup></th> <th>941.159<sup>+3</sup></th> <th>946.795<sup>+3</sup></th> <th>949.981</th> <th>984.490<sup>+3</sup></th> <th>1001.008<sup>+2</sup></th> <th>1082.520<sup>+2</sup></th> <th>1126.596<sup>+2</sup></th> </tr> </thead> <tbody> <tr> <td>Frac. Inten. (% of TIC)</td> <td>0.00</td> <td>0.06</td> <td>0.17</td> <td>6.69</td> <td>2.17</td> <td>1.98</td> <td>2.20</td> <td>2.96</td> <td>2.58</td> <td>1.97</td> <td>2.15</td> <td>2.44</td> <td>3.88</td> <td>10.26</td> <td>26.10</td> <td>1.79</td> <td>2.07</td> <td>2.12</td> <td>3.57</td> <td>8.25</td> <td>2.24</td> <td>2.98</td> <td>4.80</td> <td>4.80</td> <td>2.49</td> <td>4.08</td> </tr> <tr> <td>Rel. Inten. (% of BP)</td> <td>0.01</td> <td>0.25</td> <td>0.65</td> <td>25.64</td> <td>8.32</td> <td>7.57</td> <td>8.43</td> <td>11.33</td> <td>9.88</td> <td>7.54</td> <td>8.25</td> <td>9.34</td> <td>14.88</td> <td>39.31</td> <td>100.00</td> <td>6.87</td> <td>7.93</td> <td>8.13</td> <td>13.69</td> <td>31.63</td> <td>8.58</td> <td>11.40</td> <td>18.40</td> <td>9.53</td> <td>15.64</td> <td>15.64</td> </tr> <tr> <td>Score</td> <td>0.20</td> <td>1.00</td> <td>0.22</td> <td>0.50</td> <td>0.25</td> <td>0.75</td> <td>-0.08</td> <td>0.50</td> <td>0.25</td> <td>0.50</td> <td>0.75</td> <td>-0.09</td> <td>0.50</td> <td>-1.50</td> <td>1.50</td> <td>-0.07</td> <td>1.50</td> <td>-0.08</td> <td>0.50</td> <td>1.50</td> <td>-0.09</td> <td>1.50</td> <td>1.50</td> <td>1.50</td> <td>1.50</td> <td>-0.16</td> </tr> <tr> <td>Ion-type</td> <td>PR</td> <td>E</td> <td>LI</td> <td>b<sub>2</sub></td> <td>b<sub>4</sub>-NH<sub>3</sub></td> <td>NVQV</td> <td>b<sub>5</sub></td> <td>b<sub>6</sub>-NH<sub>3</sub></td> <td>b<sub>6</sub></td> <td>b<sub>7</sub></td> <td>Y<sub>6</sub></td> <td>Y<sub>12</sub></td> <td>Y<sub>17</sub></td> <td>Y<sub>24</sub></td> <td>Y<sub>18</sub></td> <td>Y<sub>15</sub></td> <td>Y<sub>15</sub></td> <td>Y<sub>24</sub>-NH<sub>3</sub></td> <td>Y<sub>24</sub></td> <td>Y<sub>25</sub></td> <td>Y<sub>25</sub></td> <td>Y<sub>25</sub></td> <td>Y<sub>17</sub></td> <td>Y<sub>18</sub></td> <td>Y<sub>18</sub></td> </tr> <tr> <td>Delta ppm</td> <td>-14.6</td> <td>-15.4</td> <td>-0.3</td> <td>-20.7</td> <td>2.3</td> <td>-25.9</td> <td></td> <td>12.1</td> <td>0.6</td> <td>-2.5</td> <td>-5.8</td> <td></td> <td>-8.5</td> <td>-1.7</td> <td></td> <td></td> <td>-14.5</td> <td></td> <td>36.3</td> <td>-6.0</td> <td></td> <td>-5.7</td> <td>6.7</td> <td></td> <td>-12.3</td> </tr> </tbody> </table> |        |         |        |                  |                                 |                                      |                                 |                                 |                             |                    |                |                 |                   |                                                                               | Fragment-Ion (m/z)    | 70.064          | 84.043                | 86.096                           | 172.069               | 382.174               | 441.235         | 454.203               | 498.274                | 580.310                | 597.335                | 675.332 | 692.367 | 710.415 | 731.411 | 748.907 <sup>+2</sup> | 896.955 | 913.956 <sup>+2</sup> | 919.415 <sup>+2</sup> | 941.159 <sup>+3</sup> | 946.795 <sup>+3</sup> | 949.981 | 984.490 <sup>+3</sup> | 1001.008 <sup>+2</sup> | 1082.520 <sup>+2</sup> | 1126.596 <sup>+2</sup> | Frac. Inten. (% of TIC) | 0.00 | 0.06 | 0.17 | 6.69 | 2.17 | 1.98 | 2.20 | 2.96 | 2.58 | 1.97 | 2.15 | 2.44 | 3.88 | 10.26 | 26.10 | 1.79 | 2.07 | 2.12 | 3.57 | 8.25 | 2.24 | 2.98 | 4.80 | 4.80 | 2.49 | 4.08 | Rel. Inten. (% of BP) | 0.01 | 0.25 | 0.65 | 25.64 | 8.32 | 7.57 | 8.43 | 11.33 | 9.88 | 7.54 | 8.25 | 9.34 | 14.88 | 39.31 | 100.00 | 6.87 | 7.93 | 8.13 | 13.69 | 31.63 | 8.58 | 11.40 | 18.40 | 9.53 | 15.64 | 15.64 | Score | 0.20 | 1.00 | 0.22 | 0.50 | 0.25 | 0.75 | -0.08 | 0.50 | 0.25 | 0.50 | 0.75 | -0.09 | 0.50 | -1.50 | 1.50 | -0.07 | 1.50 | -0.08 | 0.50 | 1.50 | -0.09 | 1.50 | 1.50 | 1.50 | 1.50 | -0.16 | Ion-type | PR | E | LI | b <sub>2</sub> | b <sub>4</sub> -NH <sub>3</sub> | NVQV | b <sub>5</sub> | b <sub>6</sub> -NH <sub>3</sub> | b <sub>6</sub> | b <sub>7</sub> | Y <sub>6</sub> | Y <sub>12</sub> | Y <sub>17</sub> | Y <sub>24</sub> | Y <sub>18</sub> | Y <sub>15</sub> | Y <sub>15</sub> | Y <sub>24</sub> -NH <sub>3</sub> | Y <sub>24</sub> | Y <sub>25</sub> | Y <sub>25</sub> | Y <sub>25</sub> | Y <sub>17</sub> | Y <sub>18</sub> | Y <sub>18</sub> | Delta ppm | -14.6 | -15.4 | -0.3 | -20.7 | 2.3 | -25.9 |  | 12.1 | 0.6 | -2.5 | -5.8 |  | -8.5 | -1.7 |  |  | -14.5 |  | 36.3 | -6.0 |  | -5.7 | 6.7 |  | -12.3 |
| Fragment-Ion (m/z)                                                                                                                                                                                                                                                                                                                                                                                                                                                                                                                                                                                                                                                                                                                                                                                                                                                                                                                                                                                                                                                                                                                                                                                                                                                                                                                                                                                                                                                                                                                                                                                                                                                                                                                                                                                                                                                                                                                                                                                                                                                                                                                                                                                                                                                                                                                                                                                                                                                                                                                                                                                                                                                                                                                                                                                                                                                                                                                                         | 70.064 | 84.043  | 86.096 | 172.069          | 382.174                         | 441.235                              | 454.203                         | 498.274                         | 580.310                     | 597.335            | 675.332        | 692.367         | 710.415           | 731.411                                                                       | 748.907 <sup>+2</sup> | 896.955         | 913.956 <sup>+2</sup> | 919.415 <sup>+2</sup>            | 941.159 <sup>+3</sup> | 946.795 <sup>+3</sup> | 949.981         | 984.490 <sup>+3</sup> | 1001.008 <sup>+2</sup> | 1082.520 <sup>+2</sup> | 1126.596 <sup>+2</sup> |         |         |         |         |                       |         |                       |                       |                       |                       |         |                       |                        |                        |                        |                         |      |      |      |      |      |      |      |      |      |      |      |      |      |       |       |      |      |      |      |      |      |      |      |      |      |      |                       |      |      |      |       |      |      |      |       |      |      |      |      |       |       |        |      |      |      |       |       |      |       |       |      |       |       |       |      |      |      |      |      |      |       |      |      |      |      |       |      |       |      |       |      |       |      |      |       |      |      |      |      |       |          |    |   |    |                |                                 |      |                |                                 |                |                |                |                 |                 |                 |                 |                 |                 |                                  |                 |                 |                 |                 |                 |                 |                 |           |       |       |      |       |     |       |  |      |     |      |      |  |      |      |  |  |       |  |      |      |  |      |     |  |       |
| Frac. Inten. (% of TIC)                                                                                                                                                                                                                                                                                                                                                                                                                                                                                                                                                                                                                                                                                                                                                                                                                                                                                                                                                                                                                                                                                                                                                                                                                                                                                                                                                                                                                                                                                                                                                                                                                                                                                                                                                                                                                                                                                                                                                                                                                                                                                                                                                                                                                                                                                                                                                                                                                                                                                                                                                                                                                                                                                                                                                                                                                                                                                                                                    | 0.00   | 0.06    | 0.17   | 6.69             | 2.17                            | 1.98                                 | 2.20                            | 2.96                            | 2.58                        | 1.97               | 2.15           | 2.44            | 3.88              | 10.26                                                                         | 26.10                 | 1.79            | 2.07                  | 2.12                             | 3.57                  | 8.25                  | 2.24            | 2.98                  | 4.80                   | 4.80                   | 2.49                   | 4.08    |         |         |         |                       |         |                       |                       |                       |                       |         |                       |                        |                        |                        |                         |      |      |      |      |      |      |      |      |      |      |      |      |      |       |       |      |      |      |      |      |      |      |      |      |      |      |                       |      |      |      |       |      |      |      |       |      |      |      |      |       |       |        |      |      |      |       |       |      |       |       |      |       |       |       |      |      |      |      |      |      |       |      |      |      |      |       |      |       |      |       |      |       |      |      |       |      |      |      |      |       |          |    |   |    |                |                                 |      |                |                                 |                |                |                |                 |                 |                 |                 |                 |                 |                                  |                 |                 |                 |                 |                 |                 |                 |           |       |       |      |       |     |       |  |      |     |      |      |  |      |      |  |  |       |  |      |      |  |      |     |  |       |
| Rel. Inten. (% of BP)                                                                                                                                                                                                                                                                                                                                                                                                                                                                                                                                                                                                                                                                                                                                                                                                                                                                                                                                                                                                                                                                                                                                                                                                                                                                                                                                                                                                                                                                                                                                                                                                                                                                                                                                                                                                                                                                                                                                                                                                                                                                                                                                                                                                                                                                                                                                                                                                                                                                                                                                                                                                                                                                                                                                                                                                                                                                                                                                      | 0.01   | 0.25    | 0.65   | 25.64            | 8.32                            | 7.57                                 | 8.43                            | 11.33                           | 9.88                        | 7.54               | 8.25           | 9.34            | 14.88             | 39.31                                                                         | 100.00                | 6.87            | 7.93                  | 8.13                             | 13.69                 | 31.63                 | 8.58            | 11.40                 | 18.40                  | 9.53                   | 15.64                  | 15.64   |         |         |         |                       |         |                       |                       |                       |                       |         |                       |                        |                        |                        |                         |      |      |      |      |      |      |      |      |      |      |      |      |      |       |       |      |      |      |      |      |      |      |      |      |      |      |                       |      |      |      |       |      |      |      |       |      |      |      |      |       |       |        |      |      |      |       |       |      |       |       |      |       |       |       |      |      |      |      |      |      |       |      |      |      |      |       |      |       |      |       |      |       |      |      |       |      |      |      |      |       |          |    |   |    |                |                                 |      |                |                                 |                |                |                |                 |                 |                 |                 |                 |                 |                                  |                 |                 |                 |                 |                 |                 |                 |           |       |       |      |       |     |       |  |      |     |      |      |  |      |      |  |  |       |  |      |      |  |      |     |  |       |
| Score                                                                                                                                                                                                                                                                                                                                                                                                                                                                                                                                                                                                                                                                                                                                                                                                                                                                                                                                                                                                                                                                                                                                                                                                                                                                                                                                                                                                                                                                                                                                                                                                                                                                                                                                                                                                                                                                                                                                                                                                                                                                                                                                                                                                                                                                                                                                                                                                                                                                                                                                                                                                                                                                                                                                                                                                                                                                                                                                                      | 0.20   | 1.00    | 0.22   | 0.50             | 0.25                            | 0.75                                 | -0.08                           | 0.50                            | 0.25                        | 0.50               | 0.75           | -0.09           | 0.50              | -1.50                                                                         | 1.50                  | -0.07           | 1.50                  | -0.08                            | 0.50                  | 1.50                  | -0.09           | 1.50                  | 1.50                   | 1.50                   | 1.50                   | -0.16   |         |         |         |                       |         |                       |                       |                       |                       |         |                       |                        |                        |                        |                         |      |      |      |      |      |      |      |      |      |      |      |      |      |       |       |      |      |      |      |      |      |      |      |      |      |      |                       |      |      |      |       |      |      |      |       |      |      |      |      |       |       |        |      |      |      |       |       |      |       |       |      |       |       |       |      |      |      |      |      |      |       |      |      |      |      |       |      |       |      |       |      |       |      |      |       |      |      |      |      |       |          |    |   |    |                |                                 |      |                |                                 |                |                |                |                 |                 |                 |                 |                 |                 |                                  |                 |                 |                 |                 |                 |                 |                 |           |       |       |      |       |     |       |  |      |     |      |      |  |      |      |  |  |       |  |      |      |  |      |     |  |       |
| Ion-type                                                                                                                                                                                                                                                                                                                                                                                                                                                                                                                                                                                                                                                                                                                                                                                                                                                                                                                                                                                                                                                                                                                                                                                                                                                                                                                                                                                                                                                                                                                                                                                                                                                                                                                                                                                                                                                                                                                                                                                                                                                                                                                                                                                                                                                                                                                                                                                                                                                                                                                                                                                                                                                                                                                                                                                                                                                                                                                                                   | PR     | E       | LI     | b <sub>2</sub>   | b <sub>4</sub> -NH <sub>3</sub> | NVQV                                 | b <sub>5</sub>                  | b <sub>6</sub> -NH <sub>3</sub> | b <sub>6</sub>              | b <sub>7</sub>     | Y <sub>6</sub> | Y <sub>12</sub> | Y <sub>17</sub>   | Y <sub>24</sub>                                                               | Y <sub>18</sub>       | Y <sub>15</sub> | Y <sub>15</sub>       | Y <sub>24</sub> -NH <sub>3</sub> | Y <sub>24</sub>       | Y <sub>25</sub>       | Y <sub>25</sub> | Y <sub>25</sub>       | Y <sub>17</sub>        | Y <sub>18</sub>        | Y <sub>18</sub>        |         |         |         |         |                       |         |                       |                       |                       |                       |         |                       |                        |                        |                        |                         |      |      |      |      |      |      |      |      |      |      |      |      |      |       |       |      |      |      |      |      |      |      |      |      |      |      |                       |      |      |      |       |      |      |      |       |      |      |      |      |       |       |        |      |      |      |       |       |      |       |       |      |       |       |       |      |      |      |      |      |      |       |      |      |      |      |       |      |       |      |       |      |       |      |      |       |      |      |      |      |       |          |    |   |    |                |                                 |      |                |                                 |                |                |                |                 |                 |                 |                 |                 |                 |                                  |                 |                 |                 |                 |                 |                 |                 |           |       |       |      |       |     |       |  |      |     |      |      |  |      |      |  |  |       |  |      |      |  |      |     |  |       |
| Delta ppm                                                                                                                                                                                                                                                                                                                                                                                                                                                                                                                                                                                                                                                                                                                                                                                                                                                                                                                                                                                                                                                                                                                                                                                                                                                                                                                                                                                                                                                                                                                                                                                                                                                                                                                                                                                                                                                                                                                                                                                                                                                                                                                                                                                                                                                                                                                                                                                                                                                                                                                                                                                                                                                                                                                                                                                                                                                                                                                                                  | -14.6  | -15.4   | -0.3   | -20.7            | 2.3                             | -25.9                                |                                 | 12.1                            | 0.6                         | -2.5               | -5.8           |                 | -8.5              | -1.7                                                                          |                       |                 | -14.5                 |                                  | 36.3                  | -6.0                  |                 | -5.7                  | 6.7                    |                        | -12.3                  |         |         |         |         |                       |         |                       |                       |                       |                       |         |                       |                        |                        |                        |                         |      |      |      |      |      |      |      |      |      |      |      |      |      |       |       |      |      |      |      |      |      |      |      |      |      |      |                       |      |      |      |       |      |      |      |       |      |      |      |      |       |       |        |      |      |      |       |       |      |       |       |      |       |       |       |      |      |      |      |      |      |       |      |      |      |      |       |      |       |      |       |      |       |      |      |       |      |      |      |      |       |          |    |   |    |                |                                 |      |                |                                 |                |                |                |                 |                 |                 |                 |                 |                 |                                  |                 |                 |                 |                 |                 |                 |                 |           |       |       |      |       |     |       |  |      |     |      |      |  |      |      |  |  |       |  |      |      |  |      |     |  |       |

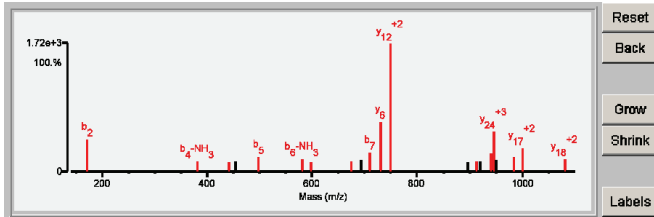

Result Summary

| Rank | Score | SPI (%) | BCS | # Unmatched Ions | Variable sites | Sequence                         | MH <sup>+</sup> Calculated (Da) | MH <sup>+</sup> Error (Da) | MH <sup>+</sup> Error (ppm) | Protein MW/PI (Da) | Species | Accession # | Protein Name                                                                    |
|------|-------|---------|-----|------------------|----------------|----------------------------------|---------------------------------|----------------------------|-----------------------------|--------------------|---------|-------------|---------------------------------------------------------------------------------|
| 1    | 26.90 | 98.9    | 11  | 1/25             | K635k          | (K)SIPICTLkNFNPNAIEHTLQWAR(D)    | 2609.3657                       | 114.0406                   | -0.9                        | 117849.6/5.49      | HUMAN   | P22314      | Ubiquitin-like modifier-activating enzyme 1 OS=Homo sapiens GN=UBA1 PE=1 SV=3   |
| 2    | 14.64 | 85.3    | 6   | 9/25             | K607k          | (K)AEPISISSINMELLELNHNHNSKAPK(K) | 2609.3239                       | 114.0823                   | 14.5                        | 207721.9/5.29      | HUMAN   | P38398      | Breast cancer type 1 susceptibility protein OS=Homo sapiens GN=BRC1A1 PE=1 SV=2 |
| 2    | 14.64 | 85.3    | 7   | 9/25             | K604k          | (K)AEPISISSINMELLELNHNHNSKAPK(K) | 2609.3239                       | 114.0823                   | 14.5                        | 207721.9/5.29      | HUMAN   | P38398      | Breast cancer type 1 susceptibility protein OS=Homo sapiens GN=BRC1A1 PE=1 SV=2 |
| 3    | 10.94 | 74.0    | 4   | 14/25            | K83k           | (K)LSNGKKFSDSHDRNEPFVSLGK(G)     | 2609.3107                       | 114.0956                   | 19.3                        | 51212.5/5.71       | HUMAN   | Q13451      | FK506-binding protein 5 OS=Homo sapiens GN=FKBP5 PE=1 SV=2                      |
| 4    | 9.44  | 73.9    | 3   | 15/25            | K123k          | (R)SVKTSASASLEATAMGTEKGAVMR(G)   | 2609.3637                       | 114.0425                   | -0.1                        | 22452.8/10.05      | HUMAN   | Q8TAG6      | Uncharacterized protein C8orf46 OS=Homo sapiens GN=C8orf46 PE=2 SV=1            |

Detailed Results

| Rank | Score | SPI (%) | BCS | # Unmatched Ions | Variable sites | Sequence                      | MH <sup>+</sup> Calculated (Da) | MH <sup>+</sup> Error (Da) | MH <sup>+</sup> Error (ppm) | Protein MW/PI (Da) | Species | Accession # | MS-Digest Index # | Protein Name                                                                  |
|------|-------|---------|-----|------------------|----------------|-------------------------------|---------------------------------|----------------------------|-----------------------------|--------------------|---------|-------------|-------------------|-------------------------------------------------------------------------------|
| 1    | 26.90 | 98.9    | 11  | 1/25             | K635k          | (K)SIPICTLkNFNPNAIEHTLQWAR(D) | 2609.3657                       | 114.0406                   | -0.9                        | 117849.6/5.49      | HUMAN   | P22314      | 812091            | Ubiquitin-like modifier-activating enzyme 1 OS=Homo sapiens GN=UBA1 PE=1 SV=3 |

| Fragment-Ion (m/z)     | 70.064 | 86.095 | 173.127 | 183.146 | 201.119 | 211.141 | 371.164 | 456.238 <sup>+2</sup> | 718.375 <sup>+2</sup> | 771.752 <sup>+3</sup> | 791.906 <sup>+2</sup> | 803.758 <sup>+3</sup> | 835.751 <sup>+3</sup> | 841.764 <sup>+3</sup> | 848.920 <sup>+2</sup> | 870.772 <sup>+3</sup> | 911.468           | 969.968 <sup>+2</sup> | 1026.540 <sup>+2</sup> | 1040.519        | 1077.049 <sup>+2</sup> | 1157.067 <sup>+2</sup> | 1213.597 <sup>+2</sup> | 1262.137 <sup>+2</sup> | 1435.703         |
|------------------------|--------|--------|---------|---------|---------|---------|---------|-----------------------|-----------------------|-----------------------|-----------------------|-----------------------|-----------------------|-----------------------|-----------------------|-----------------------|-------------------|-----------------------|------------------------|-----------------|------------------------|------------------------|------------------------|------------------------|------------------|
| Frac. Inten.(% of TIC) | 0.00   | 0.05   | 3.94    | 2.99    | 1.33    | 1.24    | 1.85    | 1.17                  | 2.21                  | 2.00                  | 1.72                  | 1.08                  | 4.27                  | 51.79                 | 1.82                  | 1.05                  | 1.50              | 1.77                  | 1.13                   | 1.45            | 2.03                   | 3.50                   | 1.25                   | 7.45                   | 1.39             |
| Rel. Inten.(% of BP)   | 0.00   | 0.09   | 7.60    | 5.78    | 2.56    | 2.40    | 3.57    | 2.25                  | 4.26                  | 3.87                  | 3.32                  | 2.09                  | 8.25                  | 100.00                | 3.52                  | 2.03                  | 2.91              | 3.42                  | 2.18                   | 2.80            | 3.93                   | 6.77                   | 2.42                   | 14.38                  | 2.69             |
| Score                  | 0.20   | 0.22   | 0.50    | 0.50    | 0.50    | 0.75    | 0.75    | 1.50                  | 1.50                  | 1.50                  | 1.50                  | 0.50                  | 0.50                  | 1.50                  | 1.50                  | -0.02                 | 1.50              | 1.50                  | 1.50                   | 1.50            | 1.50                   | 1.50                   | 1.50                   | 1.50                   | 1.50             |
| Ion-type               | PR     | LI     | ac      | PI-28   | b2      | PI      | PIC     | y <sup>+2</sup>       | y1 <sup>+2</sup>      | y18 <sup>+3</sup>     | y13 <sup>+2</sup>     | y19-NH3 <sup>+3</sup> | y20-H2O <sup>+3</sup> | y20 <sup>+3</sup>     | y14 <sup>+2</sup>     | y7 <sup>-</sup>       | y15 <sup>+2</sup> | y16 <sup>-</sup>      | y16 <sup>+2</sup>      | y8 <sup>-</sup> | y17 <sup>+2</sup>      | y18 <sup>+2</sup>      | y19 <sup>+2</sup>      | y20 <sup>+2</sup>      | y12 <sup>-</sup> |
| Delta ppm              | -18.9  | -20.0  | -15.9   | -22.9   | -25.2   | -18.5   | -33.0   | -16.8                 | -1.5                  | 37.2                  | -4.7                  | 18.7                  | -16.9                 | -6.0                  | -13.6                 | -18.2                 | -18.2             | -33.4                 | -2.2                   | -7.5            | -15.6                  | -12.2                  | -21.8                  | -10.0                  | -28.5            |

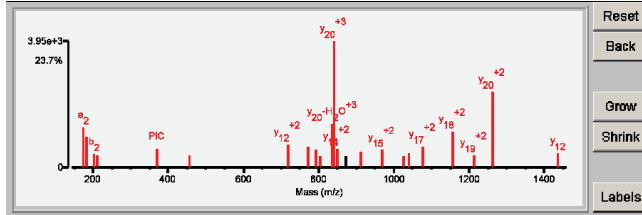



Result Summary

| Rank | Score | SPI (%) | BCS | # Unmatched ions | Variable sites | Sequence                             | MH <sup>+</sup> Calculated (Da) | MH <sup>+</sup> Error (Da) | MH <sup>+</sup> Error (ppm) | Protein MW/Pl (Da) | Species | Accession # | Protein Name                                                                  |
|------|-------|---------|-----|------------------|----------------|--------------------------------------|---------------------------------|----------------------------|-----------------------------|--------------------|---------|-------------|-------------------------------------------------------------------------------|
| 1    | 20.80 | 91.2    | 8   | 4/25             | K628k          | (R)DPPEEEIPFCTLKSFPAAIEHTIQWAR(D)    | 3182.5615                       | 114.1002                   | 17.4                        | 117970.6/5.76      | HUMAN   | A0AVT1      | Ubiquitin-like modifier-activating enzyme 6 OS=Homo sapiens GN=UBA6 PE=1 SV=1 |
| 2    | 4.89  | 64.4    | 2   | 14/25            | K233k          | (K)DPNMGAMLNTGKYAPTIDAEAYAGK(E)      | 3182.6224                       | 114.0393                   | -1.1                        | 201565.3/9.65      | HUMAN   | Q7Z8E9      | Retinoblastoma-binding protein 6 OS=Homo sapiens GN=RBBP6 PE=1 SV=1           |
| 2    | 4.89  | 64.4    | 2   | 14/25            | K232k          | (K)DPNMGAMLNTGKYAPTIDAEAYAGK(E)      | 3182.6224                       | 114.0393                   | -1.1                        | 201565.3/9.65      | HUMAN   | Q7Z8E9      | Retinoblastoma-binding protein 6 OS=Homo sapiens GN=RBBP6 PE=1 SV=1           |
| 3    | 4.02  | 63.0    | 1   | 14/25            | None           | (K)LVVVDIHKLDPHLVAEEDAQADLLSQFAAR(L) | 3296.7274                       | -0.0656                    | -19.9                       | 22151.2/6.63       | HUMAN   | Q9JUB1      | REVERSE COMM domain-containing protein 3 OS=Homo sapiens GN=COMM3 PE=1 SV=1   |
| 4    | 3.75  | 62.7    | 1   | 14/25            | M50m           | (K)LVEAERSPLIPPKQTRPEEVYLAGIEEK(R)   | 3280.7246                       | 15.9372                    | -17.5                       | 131655.0/6.87      | HUMAN   | RO60290     | REVERSE Zinc finger protein 862 OS=Homo sapiens GN=ZNF862 PE=2 SV=2           |

Detailed Results

| Rank | Score | SPI (%) | BCS | # Unmatched ions | Variable sites | Sequence                                                    | MH <sup>+</sup> Calculated (Da) | MH <sup>+</sup> Error (Da) | MH <sup>+</sup> Error (ppm) | Protein MW/Pl (Da) | Species | Accession # | MS-Digest Index # | Protein Name                                                                  |
|------|-------|---------|-----|------------------|----------------|-------------------------------------------------------------|---------------------------------|----------------------------|-----------------------------|--------------------|---------|-------------|-------------------|-------------------------------------------------------------------------------|
| 1    | 20.80 | 91.2    | 8   | 4/25             | K628k          | (R)D/P/P/E/E/E/I/P/F/C/T/L/k/S/F/P/A/A/I/E/H/T/I/Q/W/A/R(D) | 3182.5615                       | 114.1002                   | 17.4                        | 117970.6/5.76      | HUMAN   | A0AVT1      | 812189            | Ubiquitin-like modifier-activating enzyme 6 OS=Homo sapiens GN=UBA6 PE=1 SV=1 |

  

| Fragment-Ion (m/z)      | 70.065 | 84.079 | 86.097 | 185.092 | 196.060 | 213.088 | 291.196 | 438.277 | 441.286   | 485.188 | 570.280 | 598.276           | 623.666 <sup>+3</sup> | 696.880 <sup>+2</sup> | 767.394 <sup>+4</sup> | 770.412 <sup>+2</sup> | 771.892 <sup>+4</sup> | 796.163 <sup>+4</sup> | 810.363 | 829.766 <sup>+3</sup> | 867.455 <sup>+3</sup> | 935.013 <sup>+2</sup> | 953.509 <sup>+3</sup> | 1028.854 <sup>+3</sup> | 1244.146 <sup>+2</sup> |
|-------------------------|--------|--------|--------|---------|---------|---------|---------|---------|-----------|---------|---------|-------------------|-----------------------|-----------------------|-----------------------|-----------------------|-----------------------|-----------------------|---------|-----------------------|-----------------------|-----------------------|-----------------------|------------------------|------------------------|
| Frac. Inten. (% of TIC) | 0.01   | 0.08   | 0.05   | 9.15    | 1.57    | 4.25    | 2.91    | 1.52    | 2.76      | 2.33    | 1.52    | 3.27              | 1.86                  | 4.94                  | 2.06                  | 2.03                  | 8.37                  | 4.35                  | 2.42    | 13.72                 | 2.34                  | 3.97                  | 2.18                  | 14.04                  | 8.31                   |
| Rel. Inten. (% of BP)   | 0.05   | 0.59   | 0.38   | 65.20   | 11.16   | 30.31   | 20.73   | 10.86   | 19.67     | 16.58   | 10.84   | 23.27             | 13.24                 | 35.18                 | 14.66                 | 14.47                 | 59.65                 | 31.00                 | 17.24   | 97.75                 | 16.66                 | 28.26                 | 15.50                 | 100.00                 | 59.20                  |
| Score                   | 0.20   | 0.50   | 0.22   | 0.50    | -0.11   | 0.50    | -0.21   | -0.11   | -0.20     | 0.75    | 0.75    | 0.75              | 1.50                  | 1.50                  | 0.50                  | 1.50                  | 1.50                  | 1.50                  | 0.50    | 1.50                  | 1.50                  | 1.50                  | 1.50                  | 1.50                   | 1.50                   |
| Ion-type                | PR     | KQ     | LI     | a2      | b2      | b2      | b2      | PEEE    | EEEEIP-28 | EEEEIP  | EEEEIP  | y15 <sup>+3</sup> | y15 <sup>+3</sup>     | y12 <sup>+2</sup>     | y25-H2O <sup>+4</sup> | y15 <sup>+2</sup>     | y25 <sup>+4</sup>     | y26 <sup>+4</sup>     | b7      | y20 <sup>+3</sup>     | y21 <sup>+3</sup>     | y15 <sup>+2</sup>     | y23 <sup>+3</sup>     | y25 <sup>+3</sup>      | y20 <sup>+2</sup>      |
| Delta ppm               | -0.4   | -27.1  | 11.3   | -6.8    | -0.8    | -0.8    | -0.8    | -1.3    | -1.3      | 4.3     | 4.4     | 4.3               | 1.4                   | 10.2                  | 12.9                  | 6.8                   | 7.1                   | 16.4                  | 12.5    | 8.9                   | 2.3                   | 22.1                  | 28.8                  | 7.5                    | 9.8                    |

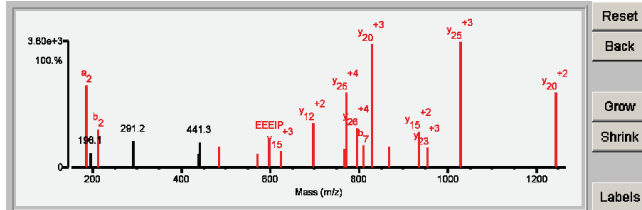

Result Summary

| Rank | Score | SPI (%) | BCS | # Unmatched Ions | Variable sites | Sequence                | MH <sup>+</sup> Calculated (Da) | MH <sup>+</sup> Error (Da) | MH <sup>+</sup> Error (ppm) | Protein MW/pI (Da) | Species | Accession # | Protein Name                                                                  |
|------|-------|---------|-----|------------------|----------------|-------------------------|---------------------------------|----------------------------|-----------------------------|--------------------|---------|-------------|-------------------------------------------------------------------------------|
| 1    | 12.83 | 67.2    | 7   | 6/25             | K739k          | (K)DGSLFWQSPkRPPSPiK(F) | 1940.0389                       | 114.0793                   | 17.7                        | 117970.6/5.76      | HUMAN   | A0AVT1      | Ubiquitin-like modifier-activating enzyme 6 OS=Homo sapiens GN=UBA6 PE=1 SV=1 |
| 2    | 10.88 | 62.3    | 6   | 7/25             | K746k          | (K)DGSLFWQSPkRPPSPiK(F) | 1940.0389                       | 114.0793                   | 17.7                        | 117970.6/5.76      | HUMAN   | A0AVT1      | Ubiquitin-like modifier-activating enzyme 6 OS=Homo sapiens GN=UBA6 PE=1 SV=1 |

Detailed Results

| Rank                                                                                                                                                                                                                                                                                                                                                                                                                                                                                                                                                                                                                                                                                                                                                                                                                                                                                                                                                                                                                                                                                                                                                                                                                                                                                                                                                                                                                                                                                                                                                                                                                                                                                                                                                                                                                                                                                                                                                                                                                                                                                                                                                                                                                                                                                                                                                                                                                                                                                                                                                                                                                                                                                                            | Score  | SPI (%) | BCS    | # Unmatched Ions | Variable sites | Sequence                                  | MH <sup>+</sup> Calculated (Da) | MH <sup>+</sup> Error (Da) | MH <sup>+</sup> Error (ppm) | Protein MW/pI (Da) | Species | Accession # | MS-Digest Index # | Protein Name                                                                  |                    |         |         |         |         |                              |                               |                                                |                               |                               |                               |         |         |         |         |         |         |         |         |         |                       |                       |                       |                       |                       |                       |                        |      |      |      |      |      |      |      |      |      |      |      |      |      |      |      |      |      |      |      |       |      |      |      |      |      |                      |      |       |      |      |       |      |       |      |       |      |      |       |       |       |      |       |       |       |       |        |       |       |       |       |       |       |      |       |      |      |      |  |      |      |      |      |  |      |      |      |      |      |       |       |       |  |      |      |      |      |      |          |    |  |    |    |    |    |  |   |                     |     |   |  |    |    |   |    |  |  |  |                              |                               |                                                |                               |                               |                               |           |      |  |     |      |      |  |  |     |      |      |  |  |     |      |      |      |  |  |  |      |     |      |      |      |      |
|-----------------------------------------------------------------------------------------------------------------------------------------------------------------------------------------------------------------------------------------------------------------------------------------------------------------------------------------------------------------------------------------------------------------------------------------------------------------------------------------------------------------------------------------------------------------------------------------------------------------------------------------------------------------------------------------------------------------------------------------------------------------------------------------------------------------------------------------------------------------------------------------------------------------------------------------------------------------------------------------------------------------------------------------------------------------------------------------------------------------------------------------------------------------------------------------------------------------------------------------------------------------------------------------------------------------------------------------------------------------------------------------------------------------------------------------------------------------------------------------------------------------------------------------------------------------------------------------------------------------------------------------------------------------------------------------------------------------------------------------------------------------------------------------------------------------------------------------------------------------------------------------------------------------------------------------------------------------------------------------------------------------------------------------------------------------------------------------------------------------------------------------------------------------------------------------------------------------------------------------------------------------------------------------------------------------------------------------------------------------------------------------------------------------------------------------------------------------------------------------------------------------------------------------------------------------------------------------------------------------------------------------------------------------------------------------------------------------|--------|---------|--------|------------------|----------------|-------------------------------------------|---------------------------------|----------------------------|-----------------------------|--------------------|---------|-------------|-------------------|-------------------------------------------------------------------------------|--------------------|---------|---------|---------|---------|------------------------------|-------------------------------|------------------------------------------------|-------------------------------|-------------------------------|-------------------------------|---------|---------|---------|---------|---------|---------|---------|---------|---------|-----------------------|-----------------------|-----------------------|-----------------------|-----------------------|-----------------------|------------------------|------|------|------|------|------|------|------|------|------|------|------|------|------|------|------|------|------|------|------|-------|------|------|------|------|------|----------------------|------|-------|------|------|-------|------|-------|------|-------|------|------|-------|-------|-------|------|-------|-------|-------|-------|--------|-------|-------|-------|-------|-------|-------|------|-------|------|------|------|--|------|------|------|------|--|------|------|------|------|------|-------|-------|-------|--|------|------|------|------|------|----------|----|--|----|----|----|----|--|---|---------------------|-----|---|--|----|----|---|----|--|--|--|------------------------------|-------------------------------|------------------------------------------------|-------------------------------|-------------------------------|-------------------------------|-----------|------|--|-----|------|------|--|--|-----|------|------|--|--|-----|------|------|------|--|--|--|------|-----|------|------|------|------|
| 1                                                                                                                                                                                                                                                                                                                                                                                                                                                                                                                                                                                                                                                                                                                                                                                                                                                                                                                                                                                                                                                                                                                                                                                                                                                                                                                                                                                                                                                                                                                                                                                                                                                                                                                                                                                                                                                                                                                                                                                                                                                                                                                                                                                                                                                                                                                                                                                                                                                                                                                                                                                                                                                                                                               | 12.83  | 67.2    | 7      | 6/25             | K739k          | (K) D G S L F W Q S P k R P P S P i K (F) | 1940.0389                       | 114.0793                   | 17.7                        | 117970.6/5.76      | HUMAN   | A0AVT1      | 812189            | Ubiquitin-like modifier-activating enzyme 6 OS=Homo sapiens GN=UBA6 PE=1 SV=1 |                    |         |         |         |         |                              |                               |                                                |                               |                               |                               |         |         |         |         |         |         |         |         |         |                       |                       |                       |                       |                       |                       |                        |      |      |      |      |      |      |      |      |      |      |      |      |      |      |      |      |      |      |      |       |      |      |      |      |      |                      |      |       |      |      |       |      |       |      |       |      |      |       |       |       |      |       |       |       |       |        |       |       |       |       |       |       |      |       |      |      |      |  |      |      |      |      |  |      |      |      |      |      |       |       |       |  |      |      |      |      |      |          |    |  |    |    |    |    |  |   |                     |     |   |  |    |    |   |    |  |  |  |                              |                               |                                                |                               |                               |                               |           |      |  |     |      |      |  |  |     |      |      |  |  |     |      |      |      |  |  |  |      |     |      |      |      |      |
| <table border="1"> <thead> <tr> <th>Fragment-ion (m/z)</th> <th>70.065</th> <th>84.045</th> <th>84.081</th> <th>86.096</th> <th>88.039</th> <th>101.070</th> <th>110.071</th> <th>120.081</th> <th>127.049</th> <th>129.102</th> <th>130.070</th> <th>136.075</th> <th>145.061</th> <th>147.113</th> <th>159.090</th> <th>173.054</th> <th>173.128</th> <th>175.088</th> <th>196.073</th> <th>567.351<sup>+2</sup></th> <th>610.861<sup>+2</sup></th> <th>666.382<sup>+2</sup></th> <th>674.895<sup>+2</sup></th> <th>767.946<sup>+2</sup></th> <th>841.462<sup>+2</sup></th> </tr> </thead> <tbody> <tr> <td>Frac. Inten.(% of TIC)</td> <td>0.01</td> <td>4.72</td> <td>0.30</td> <td>0.65</td> <td>6.97</td> <td>0.11</td> <td>3.80</td> <td>0.46</td> <td>3.96</td> <td>0.19</td> <td>0.14</td> <td>9.63</td> <td>6.19</td> <td>4.86</td> <td>0.34</td> <td>5.07</td> <td>4.00</td> <td>7.17</td> <td>3.47</td> <td>10.78</td> <td>7.91</td> <td>6.25</td> <td>3.65</td> <td>5.43</td> <td>3.93</td> </tr> <tr> <td>Rel. Inten.(% of BP)</td> <td>0.11</td> <td>43.82</td> <td>2.74</td> <td>6.06</td> <td>64.69</td> <td>0.99</td> <td>35.24</td> <td>4.24</td> <td>36.80</td> <td>1.78</td> <td>1.31</td> <td>69.34</td> <td>57.48</td> <td>45.14</td> <td>3.14</td> <td>47.07</td> <td>37.09</td> <td>66.54</td> <td>32.24</td> <td>100.00</td> <td>73.44</td> <td>58.02</td> <td>33.87</td> <td>50.41</td> <td>36.47</td> </tr> <tr> <td>Score</td> <td>0.20</td> <td>-0.44</td> <td>0.50</td> <td>0.22</td> <td>0.50</td> <td></td> <td>1.00</td> <td>1.00</td> <td>0.50</td> <td>0.20</td> <td></td> <td>0.75</td> <td>0.75</td> <td>1.50</td> <td>2.00</td> <td>0.50</td> <td>-0.37</td> <td>-0.67</td> <td>-0.32</td> <td></td> <td>1.50</td> <td>0.50</td> <td>1.50</td> <td>1.50</td> <td>1.50</td> </tr> <tr> <td>Ion-type</td> <td>PR</td> <td></td> <td>KQ</td> <td>LI</td> <td>a1</td> <td>KQ</td> <td></td> <td>F</td> <td>GS+H<sub>2</sub>O</td> <td>RKQ</td> <td>W</td> <td></td> <td>a2</td> <td>y1</td> <td>W</td> <td>b2</td> <td></td> <td></td> <td></td> <td>y<sub>9</sub><sup>+2</sup></td> <td>y<sub>10</sub><sup>+2</sup></td> <td>y<sub>11</sub>-NH<sub>3</sub><sup>+2</sup></td> <td>y<sub>11</sub><sup>+2</sup></td> <td>y<sub>12</sub><sup>+2</sup></td> <td>y<sub>13</sub><sup>+2</sup></td> </tr> <tr> <td>Delta ppm</td> <td>-0.4</td> <td></td> <td>0.3</td> <td>-0.3</td> <td>-1.2</td> <td></td> <td></td> <td>4.4</td> <td>-5.5</td> <td>-4.2</td> <td></td> <td></td> <td>2.3</td> <td>-0.0</td> <td>-7.4</td> <td>-7.4</td> <td></td> <td></td> <td></td> <td>13.4</td> <td>3.6</td> <td>10.6</td> <td>10.1</td> <td>23.5</td> <td>-0.5</td> </tr> </tbody> </table> |        |         |        |                  |                |                                           |                                 |                            |                             |                    |         |             |                   |                                                                               | Fragment-ion (m/z) | 70.065  | 84.045  | 84.081  | 86.096  | 88.039                       | 101.070                       | 110.071                                        | 120.081                       | 127.049                       | 129.102                       | 130.070 | 136.075 | 145.061 | 147.113 | 159.090 | 173.054 | 173.128 | 175.088 | 196.073 | 567.351 <sup>+2</sup> | 610.861 <sup>+2</sup> | 666.382 <sup>+2</sup> | 674.895 <sup>+2</sup> | 767.946 <sup>+2</sup> | 841.462 <sup>+2</sup> | Frac. Inten.(% of TIC) | 0.01 | 4.72 | 0.30 | 0.65 | 6.97 | 0.11 | 3.80 | 0.46 | 3.96 | 0.19 | 0.14 | 9.63 | 6.19 | 4.86 | 0.34 | 5.07 | 4.00 | 7.17 | 3.47 | 10.78 | 7.91 | 6.25 | 3.65 | 5.43 | 3.93 | Rel. Inten.(% of BP) | 0.11 | 43.82 | 2.74 | 6.06 | 64.69 | 0.99 | 35.24 | 4.24 | 36.80 | 1.78 | 1.31 | 69.34 | 57.48 | 45.14 | 3.14 | 47.07 | 37.09 | 66.54 | 32.24 | 100.00 | 73.44 | 58.02 | 33.87 | 50.41 | 36.47 | Score | 0.20 | -0.44 | 0.50 | 0.22 | 0.50 |  | 1.00 | 1.00 | 0.50 | 0.20 |  | 0.75 | 0.75 | 1.50 | 2.00 | 0.50 | -0.37 | -0.67 | -0.32 |  | 1.50 | 0.50 | 1.50 | 1.50 | 1.50 | Ion-type | PR |  | KQ | LI | a1 | KQ |  | F | GS+H <sub>2</sub> O | RKQ | W |  | a2 | y1 | W | b2 |  |  |  | y <sub>9</sub> <sup>+2</sup> | y <sub>10</sub> <sup>+2</sup> | y <sub>11</sub> -NH <sub>3</sub> <sup>+2</sup> | y <sub>11</sub> <sup>+2</sup> | y <sub>12</sub> <sup>+2</sup> | y <sub>13</sub> <sup>+2</sup> | Delta ppm | -0.4 |  | 0.3 | -0.3 | -1.2 |  |  | 4.4 | -5.5 | -4.2 |  |  | 2.3 | -0.0 | -7.4 | -7.4 |  |  |  | 13.4 | 3.6 | 10.6 | 10.1 | 23.5 | -0.5 |
| Fragment-ion (m/z)                                                                                                                                                                                                                                                                                                                                                                                                                                                                                                                                                                                                                                                                                                                                                                                                                                                                                                                                                                                                                                                                                                                                                                                                                                                                                                                                                                                                                                                                                                                                                                                                                                                                                                                                                                                                                                                                                                                                                                                                                                                                                                                                                                                                                                                                                                                                                                                                                                                                                                                                                                                                                                                                                              | 70.065 | 84.045  | 84.081 | 86.096           | 88.039         | 101.070                                   | 110.071                         | 120.081                    | 127.049                     | 129.102            | 130.070 | 136.075     | 145.061           | 147.113                                                                       | 159.090            | 173.054 | 173.128 | 175.088 | 196.073 | 567.351 <sup>+2</sup>        | 610.861 <sup>+2</sup>         | 666.382 <sup>+2</sup>                          | 674.895 <sup>+2</sup>         | 767.946 <sup>+2</sup>         | 841.462 <sup>+2</sup>         |         |         |         |         |         |         |         |         |         |                       |                       |                       |                       |                       |                       |                        |      |      |      |      |      |      |      |      |      |      |      |      |      |      |      |      |      |      |      |       |      |      |      |      |      |                      |      |       |      |      |       |      |       |      |       |      |      |       |       |       |      |       |       |       |       |        |       |       |       |       |       |       |      |       |      |      |      |  |      |      |      |      |  |      |      |      |      |      |       |       |       |  |      |      |      |      |      |          |    |  |    |    |    |    |  |   |                     |     |   |  |    |    |   |    |  |  |  |                              |                               |                                                |                               |                               |                               |           |      |  |     |      |      |  |  |     |      |      |  |  |     |      |      |      |  |  |  |      |     |      |      |      |      |
| Frac. Inten.(% of TIC)                                                                                                                                                                                                                                                                                                                                                                                                                                                                                                                                                                                                                                                                                                                                                                                                                                                                                                                                                                                                                                                                                                                                                                                                                                                                                                                                                                                                                                                                                                                                                                                                                                                                                                                                                                                                                                                                                                                                                                                                                                                                                                                                                                                                                                                                                                                                                                                                                                                                                                                                                                                                                                                                                          | 0.01   | 4.72    | 0.30   | 0.65             | 6.97           | 0.11                                      | 3.80                            | 0.46                       | 3.96                        | 0.19               | 0.14    | 9.63        | 6.19              | 4.86                                                                          | 0.34               | 5.07    | 4.00    | 7.17    | 3.47    | 10.78                        | 7.91                          | 6.25                                           | 3.65                          | 5.43                          | 3.93                          |         |         |         |         |         |         |         |         |         |                       |                       |                       |                       |                       |                       |                        |      |      |      |      |      |      |      |      |      |      |      |      |      |      |      |      |      |      |      |       |      |      |      |      |      |                      |      |       |      |      |       |      |       |      |       |      |      |       |       |       |      |       |       |       |       |        |       |       |       |       |       |       |      |       |      |      |      |  |      |      |      |      |  |      |      |      |      |      |       |       |       |  |      |      |      |      |      |          |    |  |    |    |    |    |  |   |                     |     |   |  |    |    |   |    |  |  |  |                              |                               |                                                |                               |                               |                               |           |      |  |     |      |      |  |  |     |      |      |  |  |     |      |      |      |  |  |  |      |     |      |      |      |      |
| Rel. Inten.(% of BP)                                                                                                                                                                                                                                                                                                                                                                                                                                                                                                                                                                                                                                                                                                                                                                                                                                                                                                                                                                                                                                                                                                                                                                                                                                                                                                                                                                                                                                                                                                                                                                                                                                                                                                                                                                                                                                                                                                                                                                                                                                                                                                                                                                                                                                                                                                                                                                                                                                                                                                                                                                                                                                                                                            | 0.11   | 43.82   | 2.74   | 6.06             | 64.69          | 0.99                                      | 35.24                           | 4.24                       | 36.80                       | 1.78               | 1.31    | 69.34       | 57.48             | 45.14                                                                         | 3.14               | 47.07   | 37.09   | 66.54   | 32.24   | 100.00                       | 73.44                         | 58.02                                          | 33.87                         | 50.41                         | 36.47                         |         |         |         |         |         |         |         |         |         |                       |                       |                       |                       |                       |                       |                        |      |      |      |      |      |      |      |      |      |      |      |      |      |      |      |      |      |      |      |       |      |      |      |      |      |                      |      |       |      |      |       |      |       |      |       |      |      |       |       |       |      |       |       |       |       |        |       |       |       |       |       |       |      |       |      |      |      |  |      |      |      |      |  |      |      |      |      |      |       |       |       |  |      |      |      |      |      |          |    |  |    |    |    |    |  |   |                     |     |   |  |    |    |   |    |  |  |  |                              |                               |                                                |                               |                               |                               |           |      |  |     |      |      |  |  |     |      |      |  |  |     |      |      |      |  |  |  |      |     |      |      |      |      |
| Score                                                                                                                                                                                                                                                                                                                                                                                                                                                                                                                                                                                                                                                                                                                                                                                                                                                                                                                                                                                                                                                                                                                                                                                                                                                                                                                                                                                                                                                                                                                                                                                                                                                                                                                                                                                                                                                                                                                                                                                                                                                                                                                                                                                                                                                                                                                                                                                                                                                                                                                                                                                                                                                                                                           | 0.20   | -0.44   | 0.50   | 0.22             | 0.50           |                                           | 1.00                            | 1.00                       | 0.50                        | 0.20               |         | 0.75        | 0.75              | 1.50                                                                          | 2.00               | 0.50    | -0.37   | -0.67   | -0.32   |                              | 1.50                          | 0.50                                           | 1.50                          | 1.50                          | 1.50                          |         |         |         |         |         |         |         |         |         |                       |                       |                       |                       |                       |                       |                        |      |      |      |      |      |      |      |      |      |      |      |      |      |      |      |      |      |      |      |       |      |      |      |      |      |                      |      |       |      |      |       |      |       |      |       |      |      |       |       |       |      |       |       |       |       |        |       |       |       |       |       |       |      |       |      |      |      |  |      |      |      |      |  |      |      |      |      |      |       |       |       |  |      |      |      |      |      |          |    |  |    |    |    |    |  |   |                     |     |   |  |    |    |   |    |  |  |  |                              |                               |                                                |                               |                               |                               |           |      |  |     |      |      |  |  |     |      |      |  |  |     |      |      |      |  |  |  |      |     |      |      |      |      |
| Ion-type                                                                                                                                                                                                                                                                                                                                                                                                                                                                                                                                                                                                                                                                                                                                                                                                                                                                                                                                                                                                                                                                                                                                                                                                                                                                                                                                                                                                                                                                                                                                                                                                                                                                                                                                                                                                                                                                                                                                                                                                                                                                                                                                                                                                                                                                                                                                                                                                                                                                                                                                                                                                                                                                                                        | PR     |         | KQ     | LI               | a1             | KQ                                        |                                 | F                          | GS+H <sub>2</sub> O         | RKQ                | W       |             | a2                | y1                                                                            | W                  | b2      |         |         |         | y <sub>9</sub> <sup>+2</sup> | y <sub>10</sub> <sup>+2</sup> | y <sub>11</sub> -NH <sub>3</sub> <sup>+2</sup> | y <sub>11</sub> <sup>+2</sup> | y <sub>12</sub> <sup>+2</sup> | y <sub>13</sub> <sup>+2</sup> |         |         |         |         |         |         |         |         |         |                       |                       |                       |                       |                       |                       |                        |      |      |      |      |      |      |      |      |      |      |      |      |      |      |      |      |      |      |      |       |      |      |      |      |      |                      |      |       |      |      |       |      |       |      |       |      |      |       |       |       |      |       |       |       |       |        |       |       |       |       |       |       |      |       |      |      |      |  |      |      |      |      |  |      |      |      |      |      |       |       |       |  |      |      |      |      |      |          |    |  |    |    |    |    |  |   |                     |     |   |  |    |    |   |    |  |  |  |                              |                               |                                                |                               |                               |                               |           |      |  |     |      |      |  |  |     |      |      |  |  |     |      |      |      |  |  |  |      |     |      |      |      |      |
| Delta ppm                                                                                                                                                                                                                                                                                                                                                                                                                                                                                                                                                                                                                                                                                                                                                                                                                                                                                                                                                                                                                                                                                                                                                                                                                                                                                                                                                                                                                                                                                                                                                                                                                                                                                                                                                                                                                                                                                                                                                                                                                                                                                                                                                                                                                                                                                                                                                                                                                                                                                                                                                                                                                                                                                                       | -0.4   |         | 0.3    | -0.3             | -1.2           |                                           |                                 | 4.4                        | -5.5                        | -4.2               |         |             | 2.3               | -0.0                                                                          | -7.4               | -7.4    |         |         |         | 13.4                         | 3.6                           | 10.6                                           | 10.1                          | 23.5                          | -0.5                          |         |         |         |         |         |         |         |         |         |                       |                       |                       |                       |                       |                       |                        |      |      |      |      |      |      |      |      |      |      |      |      |      |      |      |      |      |      |      |       |      |      |      |      |      |                      |      |       |      |      |       |      |       |      |       |      |      |       |       |       |      |       |       |       |       |        |       |       |       |       |       |       |      |       |      |      |      |  |      |      |      |      |  |      |      |      |      |      |       |       |       |  |      |      |      |      |      |          |    |  |    |    |    |    |  |   |                     |     |   |  |    |    |   |    |  |  |  |                              |                               |                                                |                               |                               |                               |           |      |  |     |      |      |  |  |     |      |      |  |  |     |      |      |      |  |  |  |      |     |      |      |      |      |

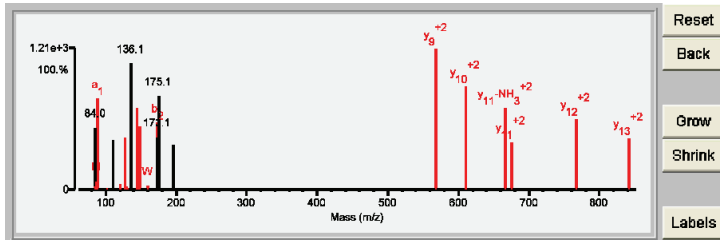



Result Summary

| Rank | Score | SPI (%) | BCS | # Unmatched ions | Variable sites | Sequence             | MH <sup>+</sup> Calculated (Da) | MH <sup>+</sup> Error (Da) | MH <sup>+</sup> Error (ppm) | Protein MW/pl (Da) | Species | Accession # | Protein Name                                                    |
|------|-------|---------|-----|------------------|----------------|----------------------|---------------------------------|----------------------------|-----------------------------|--------------------|---------|-------------|-----------------------------------------------------------------|
| 1    | 14.47 | 72.2    | 9   | 8/24             | K71k           | (R)MDNNAAIKALELYK(I) | 1664.8676                       | 114.0531                   | 5.7                         | 100688.2/5.12      | HUMAN   | Q05086      | Ubiquitin-protein ligase E3A OS=Homo sapiens GN=UBE3A PE=1 SV=4 |

Detailed Results

| Rank                                                                                                                                                                                                                                                                                                                                                                                                                                                                                                                                                                                                                                                                                                                                                                                                                                                                                                                                                                                                                                                                                                                                                                                                                                                                                                                                                                                                                                                                                                                                                                                                                                                                                                                                                                                                                                                                                                                                                                                                                                                                                                                                                                                                                                                                                                                                                                                                                                                                                                    | Score  | SPI (%) | BCS     | # Unmatched ions | Variable sites | Sequence             | MH <sup>+</sup> Calculated (Da) | MH <sup>+</sup> Error (Da) | MH <sup>+</sup> Error (ppm) | Protein MW/pl (Da) | Species | Accession #           | MS-Digest Index #     | Protein Name                                                    |                    |         |         |         |                       |         |         |                       |         |          |         |         |                       |                       |                       |         |         |         |         |                       |         |         |                       |         |          |                         |      |      |      |      |      |      |      |      |      |      |      |      |      |      |      |      |      |      |      |      |       |      |      |      |                       |      |      |       |       |       |      |      |       |       |       |       |       |       |       |       |       |       |       |       |       |        |       |       |       |       |      |      |      |       |       |      |      |      |       |       |      |       |      |       |      |       |      |      |      |       |      |      |      |      |          |    |    |    |  |  |     |   |    |  |  |    |  |                       |  |    |  |      |    |                  |  |    |                   |    |    |           |       |       |       |  |  |      |      |       |  |  |      |  |      |  |       |  |     |      |  |  |      |       |       |       |
|---------------------------------------------------------------------------------------------------------------------------------------------------------------------------------------------------------------------------------------------------------------------------------------------------------------------------------------------------------------------------------------------------------------------------------------------------------------------------------------------------------------------------------------------------------------------------------------------------------------------------------------------------------------------------------------------------------------------------------------------------------------------------------------------------------------------------------------------------------------------------------------------------------------------------------------------------------------------------------------------------------------------------------------------------------------------------------------------------------------------------------------------------------------------------------------------------------------------------------------------------------------------------------------------------------------------------------------------------------------------------------------------------------------------------------------------------------------------------------------------------------------------------------------------------------------------------------------------------------------------------------------------------------------------------------------------------------------------------------------------------------------------------------------------------------------------------------------------------------------------------------------------------------------------------------------------------------------------------------------------------------------------------------------------------------------------------------------------------------------------------------------------------------------------------------------------------------------------------------------------------------------------------------------------------------------------------------------------------------------------------------------------------------------------------------------------------------------------------------------------------------|--------|---------|---------|------------------|----------------|----------------------|---------------------------------|----------------------------|-----------------------------|--------------------|---------|-----------------------|-----------------------|-----------------------------------------------------------------|--------------------|---------|---------|---------|-----------------------|---------|---------|-----------------------|---------|----------|---------|---------|-----------------------|-----------------------|-----------------------|---------|---------|---------|---------|-----------------------|---------|---------|-----------------------|---------|----------|-------------------------|------|------|------|------|------|------|------|------|------|------|------|------|------|------|------|------|------|------|------|------|-------|------|------|------|-----------------------|------|------|-------|-------|-------|------|------|-------|-------|-------|-------|-------|-------|-------|-------|-------|-------|-------|-------|-------|--------|-------|-------|-------|-------|------|------|------|-------|-------|------|------|------|-------|-------|------|-------|------|-------|------|-------|------|------|------|-------|------|------|------|------|----------|----|----|----|--|--|-----|---|----|--|--|----|--|-----------------------|--|----|--|------|----|------------------|--|----|-------------------|----|----|-----------|-------|-------|-------|--|--|------|------|-------|--|--|------|--|------|--|-------|--|-----|------|--|--|------|-------|-------|-------|
| 1                                                                                                                                                                                                                                                                                                                                                                                                                                                                                                                                                                                                                                                                                                                                                                                                                                                                                                                                                                                                                                                                                                                                                                                                                                                                                                                                                                                                                                                                                                                                                                                                                                                                                                                                                                                                                                                                                                                                                                                                                                                                                                                                                                                                                                                                                                                                                                                                                                                                                                       | 14.47  | 72.2    | 9       | 8/24             | K71k           | (R)MDNNAAIKALELYK(I) | 1664.8676                       | 114.0531                   | 5.7                         | 100688.2/5.12      | HUMAN   | Q05086                | 812649                | Ubiquitin-protein ligase E3A OS=Homo sapiens GN=UBE3A PE=1 SV=4 |                    |         |         |         |                       |         |         |                       |         |          |         |         |                       |                       |                       |         |         |         |         |                       |         |         |                       |         |          |                         |      |      |      |      |      |      |      |      |      |      |      |      |      |      |      |      |      |      |      |      |       |      |      |      |                       |      |      |       |       |       |      |      |       |       |       |       |       |       |       |       |       |       |       |       |       |        |       |       |       |       |      |      |      |       |       |      |      |      |       |       |      |       |      |       |      |       |      |      |      |       |      |      |      |      |          |    |    |    |  |  |     |   |    |  |  |    |  |                       |  |    |  |      |    |                  |  |    |                   |    |    |           |       |       |       |  |  |      |      |       |  |  |      |  |      |  |       |  |     |      |  |  |      |       |       |       |
| <table border="1"> <thead> <tr> <th>Fragment-Ion (m/z)</th> <th>84.080</th> <th>86.095</th> <th>104.051</th> <th>120.082</th> <th>123.081</th> <th>129.102</th> <th>136.075</th> <th>147.111</th> <th>230.100</th> <th>291.190</th> <th>310.175</th> <th>356.165<sup>+2</sup></th> <th>405.905<sup>+3</sup></th> <th>414.711<sup>+2</sup></th> <th>423.250</th> <th>431.155</th> <th>489.785</th> <th>546.204</th> <th>546.330<sup>+2</sup></th> <th>729.876</th> <th>736.419</th> <th>766.917<sup>+2</sup></th> <th>978.552</th> <th>1162.654</th> </tr> </thead> <tbody> <tr> <td>Frac. Inten. (% of TIC)</td> <td>0.27</td> <td>0.29</td> <td>9.54</td> <td>3.25</td> <td>2.83</td> <td>0.19</td> <td>0.19</td> <td>5.62</td> <td>3.48</td> <td>3.19</td> <td>7.70</td> <td>4.10</td> <td>3.95</td> <td>3.62</td> <td>6.23</td> <td>4.15</td> <td>5.25</td> <td>3.85</td> <td>5.79</td> <td>3.19</td> <td>11.35</td> <td>3.02</td> <td>5.92</td> <td>3.03</td> </tr> <tr> <td>Rel. Inten. (% of BP)</td> <td>2.37</td> <td>2.55</td> <td>84.07</td> <td>28.63</td> <td>24.93</td> <td>1.72</td> <td>1.64</td> <td>49.51</td> <td>30.70</td> <td>28.08</td> <td>67.87</td> <td>36.09</td> <td>34.78</td> <td>31.85</td> <td>54.89</td> <td>36.59</td> <td>46.24</td> <td>33.95</td> <td>51.02</td> <td>28.08</td> <td>100.00</td> <td>26.58</td> <td>52.15</td> <td>26.70</td> </tr> <tr> <td>Score</td> <td>0.50</td> <td>0.22</td> <td>0.50</td> <td>-0.29</td> <td>-0.25</td> <td>0.20</td> <td>1.00</td> <td>1.50</td> <td>-0.31</td> <td>-0.28</td> <td>1.50</td> <td>-0.36</td> <td>0.50</td> <td>-0.32</td> <td>1.50</td> <td>-0.37</td> <td>1.50</td> <td>0.50</td> <td>1.50</td> <td>-0.28</td> <td>1.50</td> <td>1.50</td> <td>1.50</td> <td>1.50</td> </tr> <tr> <td>Ion-type</td> <td>KQ</td> <td>LI</td> <td>a1</td> <td></td> <td></td> <td>RKQ</td> <td>Y</td> <td>y1</td> <td></td> <td></td> <td>y2</td> <td></td> <td>y10-H2O<sup>+3</sup></td> <td></td> <td>y3</td> <td></td> <td>y++7</td> <td>b5</td> <td>y8<sup>+2</sup></td> <td></td> <td>y6</td> <td>y13<sup>+2</sup></td> <td>y7</td> <td>y9</td> </tr> <tr> <td>Delta ppm</td> <td>-10.4</td> <td>-15.4</td> <td>-29.3</td> <td></td> <td></td> <td>-5.0</td> <td>-2.1</td> <td>-14.3</td> <td></td> <td></td> <td>-3.3</td> <td></td> <td>-8.5</td> <td></td> <td>-24.1</td> <td></td> <td>0.3</td> <td>10.1</td> <td></td> <td></td> <td>-6.1</td> <td>-10.8</td> <td>-10.6</td> <td>-24.6</td> </tr> </tbody> </table> |        |         |         |                  |                |                      |                                 |                            |                             |                    |         |                       |                       |                                                                 | Fragment-Ion (m/z) | 84.080  | 86.095  | 104.051 | 120.082               | 123.081 | 129.102 | 136.075               | 147.111 | 230.100  | 291.190 | 310.175 | 356.165 <sup>+2</sup> | 405.905 <sup>+3</sup> | 414.711 <sup>+2</sup> | 423.250 | 431.155 | 489.785 | 546.204 | 546.330 <sup>+2</sup> | 729.876 | 736.419 | 766.917 <sup>+2</sup> | 978.552 | 1162.654 | Frac. Inten. (% of TIC) | 0.27 | 0.29 | 9.54 | 3.25 | 2.83 | 0.19 | 0.19 | 5.62 | 3.48 | 3.19 | 7.70 | 4.10 | 3.95 | 3.62 | 6.23 | 4.15 | 5.25 | 3.85 | 5.79 | 3.19 | 11.35 | 3.02 | 5.92 | 3.03 | Rel. Inten. (% of BP) | 2.37 | 2.55 | 84.07 | 28.63 | 24.93 | 1.72 | 1.64 | 49.51 | 30.70 | 28.08 | 67.87 | 36.09 | 34.78 | 31.85 | 54.89 | 36.59 | 46.24 | 33.95 | 51.02 | 28.08 | 100.00 | 26.58 | 52.15 | 26.70 | Score | 0.50 | 0.22 | 0.50 | -0.29 | -0.25 | 0.20 | 1.00 | 1.50 | -0.31 | -0.28 | 1.50 | -0.36 | 0.50 | -0.32 | 1.50 | -0.37 | 1.50 | 0.50 | 1.50 | -0.28 | 1.50 | 1.50 | 1.50 | 1.50 | Ion-type | KQ | LI | a1 |  |  | RKQ | Y | y1 |  |  | y2 |  | y10-H2O <sup>+3</sup> |  | y3 |  | y++7 | b5 | y8 <sup>+2</sup> |  | y6 | y13 <sup>+2</sup> | y7 | y9 | Delta ppm | -10.4 | -15.4 | -29.3 |  |  | -5.0 | -2.1 | -14.3 |  |  | -3.3 |  | -8.5 |  | -24.1 |  | 0.3 | 10.1 |  |  | -6.1 | -10.8 | -10.6 | -24.6 |
| Fragment-Ion (m/z)                                                                                                                                                                                                                                                                                                                                                                                                                                                                                                                                                                                                                                                                                                                                                                                                                                                                                                                                                                                                                                                                                                                                                                                                                                                                                                                                                                                                                                                                                                                                                                                                                                                                                                                                                                                                                                                                                                                                                                                                                                                                                                                                                                                                                                                                                                                                                                                                                                                                                      | 84.080 | 86.095  | 104.051 | 120.082          | 123.081        | 129.102              | 136.075                         | 147.111                    | 230.100                     | 291.190            | 310.175 | 356.165 <sup>+2</sup> | 405.905 <sup>+3</sup> | 414.711 <sup>+2</sup>                                           | 423.250            | 431.155 | 489.785 | 546.204 | 546.330 <sup>+2</sup> | 729.876 | 736.419 | 766.917 <sup>+2</sup> | 978.552 | 1162.654 |         |         |                       |                       |                       |         |         |         |         |                       |         |         |                       |         |          |                         |      |      |      |      |      |      |      |      |      |      |      |      |      |      |      |      |      |      |      |      |       |      |      |      |                       |      |      |       |       |       |      |      |       |       |       |       |       |       |       |       |       |       |       |       |       |        |       |       |       |       |      |      |      |       |       |      |      |      |       |       |      |       |      |       |      |       |      |      |      |       |      |      |      |      |          |    |    |    |  |  |     |   |    |  |  |    |  |                       |  |    |  |      |    |                  |  |    |                   |    |    |           |       |       |       |  |  |      |      |       |  |  |      |  |      |  |       |  |     |      |  |  |      |       |       |       |
| Frac. Inten. (% of TIC)                                                                                                                                                                                                                                                                                                                                                                                                                                                                                                                                                                                                                                                                                                                                                                                                                                                                                                                                                                                                                                                                                                                                                                                                                                                                                                                                                                                                                                                                                                                                                                                                                                                                                                                                                                                                                                                                                                                                                                                                                                                                                                                                                                                                                                                                                                                                                                                                                                                                                 | 0.27   | 0.29    | 9.54    | 3.25             | 2.83           | 0.19                 | 0.19                            | 5.62                       | 3.48                        | 3.19               | 7.70    | 4.10                  | 3.95                  | 3.62                                                            | 6.23               | 4.15    | 5.25    | 3.85    | 5.79                  | 3.19    | 11.35   | 3.02                  | 5.92    | 3.03     |         |         |                       |                       |                       |         |         |         |         |                       |         |         |                       |         |          |                         |      |      |      |      |      |      |      |      |      |      |      |      |      |      |      |      |      |      |      |      |       |      |      |      |                       |      |      |       |       |       |      |      |       |       |       |       |       |       |       |       |       |       |       |       |       |        |       |       |       |       |      |      |      |       |       |      |      |      |       |       |      |       |      |       |      |       |      |      |      |       |      |      |      |      |          |    |    |    |  |  |     |   |    |  |  |    |  |                       |  |    |  |      |    |                  |  |    |                   |    |    |           |       |       |       |  |  |      |      |       |  |  |      |  |      |  |       |  |     |      |  |  |      |       |       |       |
| Rel. Inten. (% of BP)                                                                                                                                                                                                                                                                                                                                                                                                                                                                                                                                                                                                                                                                                                                                                                                                                                                                                                                                                                                                                                                                                                                                                                                                                                                                                                                                                                                                                                                                                                                                                                                                                                                                                                                                                                                                                                                                                                                                                                                                                                                                                                                                                                                                                                                                                                                                                                                                                                                                                   | 2.37   | 2.55    | 84.07   | 28.63            | 24.93          | 1.72                 | 1.64                            | 49.51                      | 30.70                       | 28.08              | 67.87   | 36.09                 | 34.78                 | 31.85                                                           | 54.89              | 36.59   | 46.24   | 33.95   | 51.02                 | 28.08   | 100.00  | 26.58                 | 52.15   | 26.70    |         |         |                       |                       |                       |         |         |         |         |                       |         |         |                       |         |          |                         |      |      |      |      |      |      |      |      |      |      |      |      |      |      |      |      |      |      |      |      |       |      |      |      |                       |      |      |       |       |       |      |      |       |       |       |       |       |       |       |       |       |       |       |       |       |        |       |       |       |       |      |      |      |       |       |      |      |      |       |       |      |       |      |       |      |       |      |      |      |       |      |      |      |      |          |    |    |    |  |  |     |   |    |  |  |    |  |                       |  |    |  |      |    |                  |  |    |                   |    |    |           |       |       |       |  |  |      |      |       |  |  |      |  |      |  |       |  |     |      |  |  |      |       |       |       |
| Score                                                                                                                                                                                                                                                                                                                                                                                                                                                                                                                                                                                                                                                                                                                                                                                                                                                                                                                                                                                                                                                                                                                                                                                                                                                                                                                                                                                                                                                                                                                                                                                                                                                                                                                                                                                                                                                                                                                                                                                                                                                                                                                                                                                                                                                                                                                                                                                                                                                                                                   | 0.50   | 0.22    | 0.50    | -0.29            | -0.25          | 0.20                 | 1.00                            | 1.50                       | -0.31                       | -0.28              | 1.50    | -0.36                 | 0.50                  | -0.32                                                           | 1.50               | -0.37   | 1.50    | 0.50    | 1.50                  | -0.28   | 1.50    | 1.50                  | 1.50    | 1.50     |         |         |                       |                       |                       |         |         |         |         |                       |         |         |                       |         |          |                         |      |      |      |      |      |      |      |      |      |      |      |      |      |      |      |      |      |      |      |      |       |      |      |      |                       |      |      |       |       |       |      |      |       |       |       |       |       |       |       |       |       |       |       |       |       |        |       |       |       |       |      |      |      |       |       |      |      |      |       |       |      |       |      |       |      |       |      |      |      |       |      |      |      |      |          |    |    |    |  |  |     |   |    |  |  |    |  |                       |  |    |  |      |    |                  |  |    |                   |    |    |           |       |       |       |  |  |      |      |       |  |  |      |  |      |  |       |  |     |      |  |  |      |       |       |       |
| Ion-type                                                                                                                                                                                                                                                                                                                                                                                                                                                                                                                                                                                                                                                                                                                                                                                                                                                                                                                                                                                                                                                                                                                                                                                                                                                                                                                                                                                                                                                                                                                                                                                                                                                                                                                                                                                                                                                                                                                                                                                                                                                                                                                                                                                                                                                                                                                                                                                                                                                                                                | KQ     | LI      | a1      |                  |                | RKQ                  | Y                               | y1                         |                             |                    | y2      |                       | y10-H2O <sup>+3</sup> |                                                                 | y3                 |         | y++7    | b5      | y8 <sup>+2</sup>      |         | y6      | y13 <sup>+2</sup>     | y7      | y9       |         |         |                       |                       |                       |         |         |         |         |                       |         |         |                       |         |          |                         |      |      |      |      |      |      |      |      |      |      |      |      |      |      |      |      |      |      |      |      |       |      |      |      |                       |      |      |       |       |       |      |      |       |       |       |       |       |       |       |       |       |       |       |       |       |        |       |       |       |       |      |      |      |       |       |      |      |      |       |       |      |       |      |       |      |       |      |      |      |       |      |      |      |      |          |    |    |    |  |  |     |   |    |  |  |    |  |                       |  |    |  |      |    |                  |  |    |                   |    |    |           |       |       |       |  |  |      |      |       |  |  |      |  |      |  |       |  |     |      |  |  |      |       |       |       |
| Delta ppm                                                                                                                                                                                                                                                                                                                                                                                                                                                                                                                                                                                                                                                                                                                                                                                                                                                                                                                                                                                                                                                                                                                                                                                                                                                                                                                                                                                                                                                                                                                                                                                                                                                                                                                                                                                                                                                                                                                                                                                                                                                                                                                                                                                                                                                                                                                                                                                                                                                                                               | -10.4  | -15.4   | -29.3   |                  |                | -5.0                 | -2.1                            | -14.3                      |                             |                    | -3.3    |                       | -8.5                  |                                                                 | -24.1              |         | 0.3     | 10.1    |                       |         | -6.1    | -10.8                 | -10.6   | -24.6    |         |         |                       |                       |                       |         |         |         |         |                       |         |         |                       |         |          |                         |      |      |      |      |      |      |      |      |      |      |      |      |      |      |      |      |      |      |      |      |       |      |      |      |                       |      |      |       |       |       |      |      |       |       |       |       |       |       |       |       |       |       |       |       |       |        |       |       |       |       |      |      |      |       |       |      |      |      |       |       |      |       |      |       |      |       |      |      |      |       |      |      |      |      |          |    |    |    |  |  |     |   |    |  |  |    |  |                       |  |    |  |      |    |                  |  |    |                   |    |    |           |       |       |       |  |  |      |      |       |  |  |      |  |      |  |       |  |     |      |  |  |      |       |       |       |

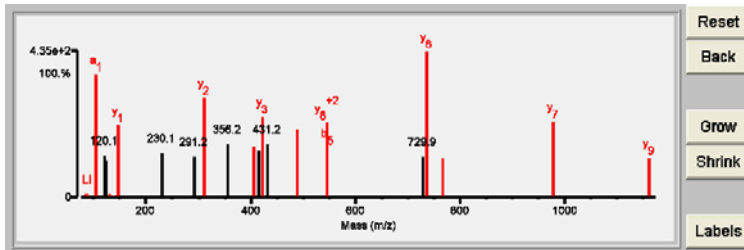

Result Summary

| Rank | Score | SPI (%) | BCS | # Unmatched Ions | Variable sites | Sequence                                                 | MH <sup>+</sup> Calculated (Da) | MH <sup>+</sup> Error (Da) | MH <sup>+</sup> Error (ppm) | Protein MW/pl (Da) | Species | Accession #            | Protein Name                                                                         |
|------|-------|---------|-----|------------------|----------------|----------------------------------------------------------|---------------------------------|----------------------------|-----------------------------|--------------------|---------|------------------------|--------------------------------------------------------------------------------------|
| 1    | 17.49 | 81.7    | 10  | 7/25             | K67k           | (R)GGGGVGF <del>P</del> AMkQIGNVAALPGV <del>H</del> R(S) | 2516.3918                       | 114.0511                   | 3.1                         | 55210.6/6.77       | HUMAN   | <a href="#">Q9Y310</a> | UPF0027 protein C22orf28 OS=Homo sapiens GN=C22orf28 PE=1 SV=1                       |
| 2    | 4.72  | 56.9    | 2   | 14/25            | K695k          | (R)DFLKRIFVEAKLRPSADELLR(H)                              | 2516.4348                       | 114.0082                   | -13.2                       | 69741.2/8.04       | HUMAN   | <a href="#">Q9Y2U5</a> | Mitogen-activated protein kinase kinase kinase 2 OS=Homo sapiens GN=MAP3K2 PE=1 SV=2 |

Detailed Results

| Rank                                                                                                                                                                                                                                                                                                                                                                                                                                                                                                                                                                                                                                                                                                                                                                                                                                                                                                                                                                                                                                                                                                                                                                                                                                                                                                                                                                                                                                                                                                                                                                                                                                                                                                                                                                                                                                                                                                                                                                                                                                                                                                                                                                                                                                                                                                                                                                                                                                                                                                                                                                         | Score  | SPI (%) | BCS     | # Unmatched Ions | Variable sites | Sequence                                                    | MH <sup>+</sup> Calculated (Da) | MH <sup>+</sup> Error (Da) | MH <sup>+</sup> Error (ppm) | Protein MW/pl (Da) | Species               | Accession #            | MS-Digest Index #      | Protein Name                                                   |                    |         |                       |         |         |         |                       |         |         |         |                       |                       |                       |         |         |         |         |                       |         |         |         |                       |         |         |         |                       |                         |      |      |      |      |      |      |      |      |      |      |      |      |      |      |      |      |      |      |      |       |      |      |      |      |      |                       |      |      |      |      |       |       |       |       |       |       |       |       |       |       |       |       |       |       |       |        |       |       |       |       |       |       |      |      |      |      |       |      |      |      |      |      |      |       |       |       |      |       |       |      |       |      |      |      |      |      |      |          |   |    |   |     |  |    |    |    |     |    |                  |  |  |  |    |  |  |    |  |    |                   |    |    |    |                   |           |      |     |      |      |  |  |     |    |  |  |       |  |  |  |       |  |  |       |  |     |      |       |      |       |      |
|------------------------------------------------------------------------------------------------------------------------------------------------------------------------------------------------------------------------------------------------------------------------------------------------------------------------------------------------------------------------------------------------------------------------------------------------------------------------------------------------------------------------------------------------------------------------------------------------------------------------------------------------------------------------------------------------------------------------------------------------------------------------------------------------------------------------------------------------------------------------------------------------------------------------------------------------------------------------------------------------------------------------------------------------------------------------------------------------------------------------------------------------------------------------------------------------------------------------------------------------------------------------------------------------------------------------------------------------------------------------------------------------------------------------------------------------------------------------------------------------------------------------------------------------------------------------------------------------------------------------------------------------------------------------------------------------------------------------------------------------------------------------------------------------------------------------------------------------------------------------------------------------------------------------------------------------------------------------------------------------------------------------------------------------------------------------------------------------------------------------------------------------------------------------------------------------------------------------------------------------------------------------------------------------------------------------------------------------------------------------------------------------------------------------------------------------------------------------------------------------------------------------------------------------------------------------------|--------|---------|---------|------------------|----------------|-------------------------------------------------------------|---------------------------------|----------------------------|-----------------------------|--------------------|-----------------------|------------------------|------------------------|----------------------------------------------------------------|--------------------|---------|-----------------------|---------|---------|---------|-----------------------|---------|---------|---------|-----------------------|-----------------------|-----------------------|---------|---------|---------|---------|-----------------------|---------|---------|---------|-----------------------|---------|---------|---------|-----------------------|-------------------------|------|------|------|------|------|------|------|------|------|------|------|------|------|------|------|------|------|------|------|-------|------|------|------|------|------|-----------------------|------|------|------|------|-------|-------|-------|-------|-------|-------|-------|-------|-------|-------|-------|-------|-------|-------|-------|--------|-------|-------|-------|-------|-------|-------|------|------|------|------|-------|------|------|------|------|------|------|-------|-------|-------|------|-------|-------|------|-------|------|------|------|------|------|------|----------|---|----|---|-----|--|----|----|----|-----|----|------------------|--|--|--|----|--|--|----|--|----|-------------------|----|----|----|-------------------|-----------|------|-----|------|------|--|--|-----|----|--|--|-------|--|--|--|-------|--|--|-------|--|-----|------|-------|------|-------|------|
| 1                                                                                                                                                                                                                                                                                                                                                                                                                                                                                                                                                                                                                                                                                                                                                                                                                                                                                                                                                                                                                                                                                                                                                                                                                                                                                                                                                                                                                                                                                                                                                                                                                                                                                                                                                                                                                                                                                                                                                                                                                                                                                                                                                                                                                                                                                                                                                                                                                                                                                                                                                                            | 17.49  | 81.7    | 10      | 7/25             | K67k           | (R)GGGVGGVGF <del>L</del> PAMkQIGNVAALPGV <del>H</del> R(S) | 2516.3918                       | 114.0511                   | 3.1                         | 55210.6/6.77       | HUMAN                 | <a href="#">Q9Y310</a> | <a href="#">132681</a> | UPF0027 protein C22orf28 OS=Homo sapiens GN=C22orf28 PE=1 SV=1 |                    |         |                       |         |         |         |                       |         |         |         |                       |                       |                       |         |         |         |         |                       |         |         |         |                       |         |         |         |                       |                         |      |      |      |      |      |      |      |      |      |      |      |      |      |      |      |      |      |      |      |       |      |      |      |      |      |                       |      |      |      |      |       |       |       |       |       |       |       |       |       |       |       |       |       |       |       |        |       |       |       |       |       |       |      |      |      |      |       |      |      |      |      |      |      |       |       |       |      |       |       |      |       |      |      |      |      |      |      |          |   |    |   |     |  |    |    |    |     |    |                  |  |  |  |    |  |  |    |  |    |                   |    |    |    |                   |           |      |     |      |      |  |  |     |    |  |  |       |  |  |  |       |  |  |       |  |     |      |       |      |       |      |
| <table border="1"> <thead> <tr> <th>Fragment-ion (m/z)</th> <th>72.081</th> <th>86.097</th> <th>120.080</th> <th>129.101</th> <th>143.111</th> <th>172.072</th> <th>175.122</th> <th>243.141</th> <th>262.116</th> <th>312.170</th> <th>339.698<sup>+2</sup></th> <th>378.211<sup>+2</sup></th> <th>487.288</th> <th>575.304</th> <th>581.345</th> <th>587.304</th> <th>619.336<sup>+2</sup></th> <th>645.321</th> <th>663.058</th> <th>678.407</th> <th>714.372<sup>+2</sup></th> <th>791.472</th> <th>862.540</th> <th>933.548</th> <th>993.556<sup>+2</sup></th> </tr> </thead> <tbody> <tr> <td>Frac. Inten. (% of TIC)</td> <td>0.33</td> <td>0.35</td> <td>0.25</td> <td>0.08</td> <td>3.15</td> <td>2.27</td> <td>3.83</td> <td>7.41</td> <td>4.02</td> <td>4.08</td> <td>6.05</td> <td>2.24</td> <td>2.69</td> <td>3.04</td> <td>6.78</td> <td>2.29</td> <td>2.27</td> <td>2.63</td> <td>2.64</td> <td>19.54</td> <td>2.94</td> <td>4.89</td> <td>4.08</td> <td>2.88</td> <td>9.28</td> </tr> <tr> <td>Rel. Inten. (% of BP)</td> <td>1.66</td> <td>1.78</td> <td>1.26</td> <td>0.41</td> <td>16.11</td> <td>11.63</td> <td>19.61</td> <td>37.91</td> <td>20.55</td> <td>20.89</td> <td>30.93</td> <td>11.45</td> <td>13.76</td> <td>15.53</td> <td>34.71</td> <td>11.70</td> <td>11.64</td> <td>13.48</td> <td>13.50</td> <td>100.00</td> <td>15.05</td> <td>25.03</td> <td>20.85</td> <td>14.73</td> <td>47.46</td> </tr> <tr> <td>Score</td> <td>0.50</td> <td>0.22</td> <td>1.00</td> <td>0.20</td> <td>-0.16</td> <td>0.75</td> <td>1.50</td> <td>0.50</td> <td>0.75</td> <td>1.50</td> <td>1.50</td> <td>-0.11</td> <td>-0.14</td> <td>-0.16</td> <td>1.50</td> <td>-0.12</td> <td>-0.12</td> <td>0.50</td> <td>-0.14</td> <td>1.50</td> <td>0.50</td> <td>1.50</td> <td>1.50</td> <td>1.50</td> <td>1.50</td> </tr> <tr> <td>Ion-type</td> <td>V</td> <td>LI</td> <td>F</td> <td>RKQ</td> <td></td> <td>b3</td> <td>y1</td> <td>a4</td> <td>GGF</td> <td>y2</td> <td>y6<sup>+2</sup></td> <td></td> <td></td> <td></td> <td>y5</td> <td></td> <td></td> <td>b8</td> <td></td> <td>y6</td> <td>b14<sup>+2</sup></td> <td>y7</td> <td>y8</td> <td>y9</td> <td>y18<sup>+2</sup></td> </tr> <tr> <td>Delta ppm</td> <td>-2.4</td> <td>5.5</td> <td>-9.0</td> <td>-8.8</td> <td></td> <td></td> <td>0.2</td> <td>GN</td> <td></td> <td></td> <td>-23.7</td> <td></td> <td></td> <td></td> <td>-11.5</td> <td></td> <td></td> <td>-22.6</td> <td></td> <td>3.4</td> <td>-6.9</td> <td>-20.8</td> <td>16.4</td> <td>-15.8</td> <td>-0.5</td> </tr> </tbody> </table> |        |         |         |                  |                |                                                             |                                 |                            |                             |                    |                       |                        |                        |                                                                | Fragment-ion (m/z) | 72.081  | 86.097                | 120.080 | 129.101 | 143.111 | 172.072               | 175.122 | 243.141 | 262.116 | 312.170               | 339.698 <sup>+2</sup> | 378.211 <sup>+2</sup> | 487.288 | 575.304 | 581.345 | 587.304 | 619.336 <sup>+2</sup> | 645.321 | 663.058 | 678.407 | 714.372 <sup>+2</sup> | 791.472 | 862.540 | 933.548 | 993.556 <sup>+2</sup> | Frac. Inten. (% of TIC) | 0.33 | 0.35 | 0.25 | 0.08 | 3.15 | 2.27 | 3.83 | 7.41 | 4.02 | 4.08 | 6.05 | 2.24 | 2.69 | 3.04 | 6.78 | 2.29 | 2.27 | 2.63 | 2.64 | 19.54 | 2.94 | 4.89 | 4.08 | 2.88 | 9.28 | Rel. Inten. (% of BP) | 1.66 | 1.78 | 1.26 | 0.41 | 16.11 | 11.63 | 19.61 | 37.91 | 20.55 | 20.89 | 30.93 | 11.45 | 13.76 | 15.53 | 34.71 | 11.70 | 11.64 | 13.48 | 13.50 | 100.00 | 15.05 | 25.03 | 20.85 | 14.73 | 47.46 | Score | 0.50 | 0.22 | 1.00 | 0.20 | -0.16 | 0.75 | 1.50 | 0.50 | 0.75 | 1.50 | 1.50 | -0.11 | -0.14 | -0.16 | 1.50 | -0.12 | -0.12 | 0.50 | -0.14 | 1.50 | 0.50 | 1.50 | 1.50 | 1.50 | 1.50 | Ion-type | V | LI | F | RKQ |  | b3 | y1 | a4 | GGF | y2 | y6 <sup>+2</sup> |  |  |  | y5 |  |  | b8 |  | y6 | b14 <sup>+2</sup> | y7 | y8 | y9 | y18 <sup>+2</sup> | Delta ppm | -2.4 | 5.5 | -9.0 | -8.8 |  |  | 0.2 | GN |  |  | -23.7 |  |  |  | -11.5 |  |  | -22.6 |  | 3.4 | -6.9 | -20.8 | 16.4 | -15.8 | -0.5 |
| Fragment-ion (m/z)                                                                                                                                                                                                                                                                                                                                                                                                                                                                                                                                                                                                                                                                                                                                                                                                                                                                                                                                                                                                                                                                                                                                                                                                                                                                                                                                                                                                                                                                                                                                                                                                                                                                                                                                                                                                                                                                                                                                                                                                                                                                                                                                                                                                                                                                                                                                                                                                                                                                                                                                                           | 72.081 | 86.097  | 120.080 | 129.101          | 143.111        | 172.072                                                     | 175.122                         | 243.141                    | 262.116                     | 312.170            | 339.698 <sup>+2</sup> | 378.211 <sup>+2</sup>  | 487.288                | 575.304                                                        | 581.345            | 587.304 | 619.336 <sup>+2</sup> | 645.321 | 663.058 | 678.407 | 714.372 <sup>+2</sup> | 791.472 | 862.540 | 933.548 | 993.556 <sup>+2</sup> |                       |                       |         |         |         |         |                       |         |         |         |                       |         |         |         |                       |                         |      |      |      |      |      |      |      |      |      |      |      |      |      |      |      |      |      |      |      |       |      |      |      |      |      |                       |      |      |      |      |       |       |       |       |       |       |       |       |       |       |       |       |       |       |       |        |       |       |       |       |       |       |      |      |      |      |       |      |      |      |      |      |      |       |       |       |      |       |       |      |       |      |      |      |      |      |      |          |   |    |   |     |  |    |    |    |     |    |                  |  |  |  |    |  |  |    |  |    |                   |    |    |    |                   |           |      |     |      |      |  |  |     |    |  |  |       |  |  |  |       |  |  |       |  |     |      |       |      |       |      |
| Frac. Inten. (% of TIC)                                                                                                                                                                                                                                                                                                                                                                                                                                                                                                                                                                                                                                                                                                                                                                                                                                                                                                                                                                                                                                                                                                                                                                                                                                                                                                                                                                                                                                                                                                                                                                                                                                                                                                                                                                                                                                                                                                                                                                                                                                                                                                                                                                                                                                                                                                                                                                                                                                                                                                                                                      | 0.33   | 0.35    | 0.25    | 0.08             | 3.15           | 2.27                                                        | 3.83                            | 7.41                       | 4.02                        | 4.08               | 6.05                  | 2.24                   | 2.69                   | 3.04                                                           | 6.78               | 2.29    | 2.27                  | 2.63    | 2.64    | 19.54   | 2.94                  | 4.89    | 4.08    | 2.88    | 9.28                  |                       |                       |         |         |         |         |                       |         |         |         |                       |         |         |         |                       |                         |      |      |      |      |      |      |      |      |      |      |      |      |      |      |      |      |      |      |      |       |      |      |      |      |      |                       |      |      |      |      |       |       |       |       |       |       |       |       |       |       |       |       |       |       |       |        |       |       |       |       |       |       |      |      |      |      |       |      |      |      |      |      |      |       |       |       |      |       |       |      |       |      |      |      |      |      |      |          |   |    |   |     |  |    |    |    |     |    |                  |  |  |  |    |  |  |    |  |    |                   |    |    |    |                   |           |      |     |      |      |  |  |     |    |  |  |       |  |  |  |       |  |  |       |  |     |      |       |      |       |      |
| Rel. Inten. (% of BP)                                                                                                                                                                                                                                                                                                                                                                                                                                                                                                                                                                                                                                                                                                                                                                                                                                                                                                                                                                                                                                                                                                                                                                                                                                                                                                                                                                                                                                                                                                                                                                                                                                                                                                                                                                                                                                                                                                                                                                                                                                                                                                                                                                                                                                                                                                                                                                                                                                                                                                                                                        | 1.66   | 1.78    | 1.26    | 0.41             | 16.11          | 11.63                                                       | 19.61                           | 37.91                      | 20.55                       | 20.89              | 30.93                 | 11.45                  | 13.76                  | 15.53                                                          | 34.71              | 11.70   | 11.64                 | 13.48   | 13.50   | 100.00  | 15.05                 | 25.03   | 20.85   | 14.73   | 47.46                 |                       |                       |         |         |         |         |                       |         |         |         |                       |         |         |         |                       |                         |      |      |      |      |      |      |      |      |      |      |      |      |      |      |      |      |      |      |      |       |      |      |      |      |      |                       |      |      |      |      |       |       |       |       |       |       |       |       |       |       |       |       |       |       |       |        |       |       |       |       |       |       |      |      |      |      |       |      |      |      |      |      |      |       |       |       |      |       |       |      |       |      |      |      |      |      |      |          |   |    |   |     |  |    |    |    |     |    |                  |  |  |  |    |  |  |    |  |    |                   |    |    |    |                   |           |      |     |      |      |  |  |     |    |  |  |       |  |  |  |       |  |  |       |  |     |      |       |      |       |      |
| Score                                                                                                                                                                                                                                                                                                                                                                                                                                                                                                                                                                                                                                                                                                                                                                                                                                                                                                                                                                                                                                                                                                                                                                                                                                                                                                                                                                                                                                                                                                                                                                                                                                                                                                                                                                                                                                                                                                                                                                                                                                                                                                                                                                                                                                                                                                                                                                                                                                                                                                                                                                        | 0.50   | 0.22    | 1.00    | 0.20             | -0.16          | 0.75                                                        | 1.50                            | 0.50                       | 0.75                        | 1.50               | 1.50                  | -0.11                  | -0.14                  | -0.16                                                          | 1.50               | -0.12   | -0.12                 | 0.50    | -0.14   | 1.50    | 0.50                  | 1.50    | 1.50    | 1.50    | 1.50                  |                       |                       |         |         |         |         |                       |         |         |         |                       |         |         |         |                       |                         |      |      |      |      |      |      |      |      |      |      |      |      |      |      |      |      |      |      |      |       |      |      |      |      |      |                       |      |      |      |      |       |       |       |       |       |       |       |       |       |       |       |       |       |       |       |        |       |       |       |       |       |       |      |      |      |      |       |      |      |      |      |      |      |       |       |       |      |       |       |      |       |      |      |      |      |      |      |          |   |    |   |     |  |    |    |    |     |    |                  |  |  |  |    |  |  |    |  |    |                   |    |    |    |                   |           |      |     |      |      |  |  |     |    |  |  |       |  |  |  |       |  |  |       |  |     |      |       |      |       |      |
| Ion-type                                                                                                                                                                                                                                                                                                                                                                                                                                                                                                                                                                                                                                                                                                                                                                                                                                                                                                                                                                                                                                                                                                                                                                                                                                                                                                                                                                                                                                                                                                                                                                                                                                                                                                                                                                                                                                                                                                                                                                                                                                                                                                                                                                                                                                                                                                                                                                                                                                                                                                                                                                     | V      | LI      | F       | RKQ              |                | b3                                                          | y1                              | a4                         | GGF                         | y2                 | y6 <sup>+2</sup>      |                        |                        |                                                                | y5                 |         |                       | b8      |         | y6      | b14 <sup>+2</sup>     | y7      | y8      | y9      | y18 <sup>+2</sup>     |                       |                       |         |         |         |         |                       |         |         |         |                       |         |         |         |                       |                         |      |      |      |      |      |      |      |      |      |      |      |      |      |      |      |      |      |      |      |       |      |      |      |      |      |                       |      |      |      |      |       |       |       |       |       |       |       |       |       |       |       |       |       |       |       |        |       |       |       |       |       |       |      |      |      |      |       |      |      |      |      |      |      |       |       |       |      |       |       |      |       |      |      |      |      |      |      |          |   |    |   |     |  |    |    |    |     |    |                  |  |  |  |    |  |  |    |  |    |                   |    |    |    |                   |           |      |     |      |      |  |  |     |    |  |  |       |  |  |  |       |  |  |       |  |     |      |       |      |       |      |
| Delta ppm                                                                                                                                                                                                                                                                                                                                                                                                                                                                                                                                                                                                                                                                                                                                                                                                                                                                                                                                                                                                                                                                                                                                                                                                                                                                                                                                                                                                                                                                                                                                                                                                                                                                                                                                                                                                                                                                                                                                                                                                                                                                                                                                                                                                                                                                                                                                                                                                                                                                                                                                                                    | -2.4   | 5.5     | -9.0    | -8.8             |                |                                                             | 0.2                             | GN                         |                             |                    | -23.7                 |                        |                        |                                                                | -11.5              |         |                       | -22.6   |         | 3.4     | -6.9                  | -20.8   | 16.4    | -15.8   | -0.5                  |                       |                       |         |         |         |         |                       |         |         |         |                       |         |         |         |                       |                         |      |      |      |      |      |      |      |      |      |      |      |      |      |      |      |      |      |      |      |       |      |      |      |      |      |                       |      |      |      |      |       |       |       |       |       |       |       |       |       |       |       |       |       |       |       |        |       |       |       |       |       |       |      |      |      |      |       |      |      |      |      |      |      |       |       |       |      |       |       |      |       |      |      |      |      |      |      |          |   |    |   |     |  |    |    |    |     |    |                  |  |  |  |    |  |  |    |  |    |                   |    |    |    |                   |           |      |     |      |      |  |  |     |    |  |  |       |  |  |  |       |  |  |       |  |     |      |       |      |       |      |

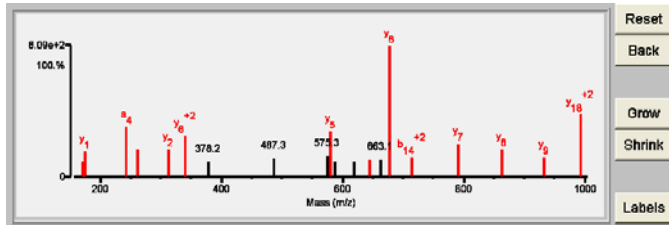

Result Summary

| Rank | Score | SPI (%) | BCS | # Unmatched ions | Variable sites | Sequence                               | MH <sup>+</sup> Calculated (Da) | MH <sup>+</sup> Error (Da) | MH <sup>+</sup> Error (ppm) | Protein MW/pI (Da) | Species | Accession # | Protein Name                                                   |
|------|-------|---------|-----|------------------|----------------|----------------------------------------|---------------------------------|----------------------------|-----------------------------|--------------------|---------|-------------|----------------------------------------------------------------|
| 1    | 18.73 | 81.4    | 10  | 6/25             | K65k           | (R)LCLEIQG IINPEAL/S/S V/I/K E L/R (K) | 2156.1380                       | 114.0520                   | 4.0                         | 8478.8/4.76        | HUMAN   | Q08AG7      | UPF0582 protein C13orf37 OS=Homo sapiens GN=C13orf37 PE=2 SV=2 |

Detailed Results

| Rank                    | Score  | SPI (%)        | BCS     | # Unmatched ions | Variable sites | Sequence                               | MH <sup>+</sup> Calculated (Da) | MH <sup>+</sup> Error (Da) | MH <sup>+</sup> Error (ppm) | Protein MW/pI (Da) | Species        | Accession #                                     | MS-Digest Index #     | Protein Name                                                   |                       |                |                               |         |                       |                               |                       |                               |                                                 |                               |                |
|-------------------------|--------|----------------|---------|------------------|----------------|----------------------------------------|---------------------------------|----------------------------|-----------------------------|--------------------|----------------|-------------------------------------------------|-----------------------|----------------------------------------------------------------|-----------------------|----------------|-------------------------------|---------|-----------------------|-------------------------------|-----------------------|-------------------------------|-------------------------------------------------|-------------------------------|----------------|
| 1                       | 18.73  | 81.4           | 10      | 6/25             | K65k           | (R)LCLEIQG IINPEAL/S/S V/I/K E L/R (K) | 2156.1380                       | 114.0520                   | 4.0                         | 8478.8/4.76        | HUMAN          | Q08AG7                                          | 108329                | UPF0582 protein C13orf37 OS=Homo sapiens GN=C13orf37 PE=2 SV=2 |                       |                |                               |         |                       |                               |                       |                               |                                                 |                               |                |
| Fragment-ion (m/z)      | 72.082 | 86.097         | 131.117 | 175.119          | 274.123        | 403.166                                | 479.792 <sup>+2</sup>           | 523.304                    | 659.396                     | 673.361            | 701.327        | 713.708 <sup>+3</sup>                           | 719.372 <sup>+3</sup> | 728.414 <sup>+2</sup>                                          | 750.071 <sup>+3</sup> | 772.469        | 785.436 <sup>+2</sup>         | 815.364 | 870.483 <sup>+2</sup> | 925.997                       | 934.501 <sup>+2</sup> | 958.572 <sup>+2</sup>         | 990.021 <sup>+2</sup>                           | 999.033 <sup>+2</sup>         | 1045.598       |
| Frac. Inten. (% of TIC) | 0.10   | 10.56          | 2.68    | 2.24             | 6.56           | 2.26                                   | 2.17                            | 2.91                       | 3.02                        | 1.90               | 3.17           | 2.08                                            | 5.91                  | 7.82                                                           | 1.96                  | 4.62           | 4.09                          | 2.65    | 6.35                  | 2.65                          | 2.85                  | 3.55                          | 3.28                                            | 9.57                          | 5.06           |
| Rel. Inten. (% of BP)   | 0.97   | 100.00         | 25.40   | 21.21            | 62.17          | 21.37                                  | 20.53                           | 27.56                      | 28.60                       | 17.96              | 30.00          | 19.66                                           | 55.98                 | 74.06                                                          | 18.55                 | 43.75          | 38.73                         | 25.12   | 60.19                 | 25.14                         | 27.02                 | 33.62                         | 31.09                                           | 90.67                         | 47.93          |
| Score                   | 0.50   | 0.50           | -0.25   | 1.50             | 0.50           | 0.50                                   | 1.50                            | 1.50                       | 1.50                        | -0.18              | 0.50           | 0.50                                            | -0.56                 | 1.50                                                           | -0.19                 | 1.50           | 1.50                          | 0.50    | 1.50                  | -0.25                         | 1.50                  | -0.34                         | 0.50                                            | 1.50                          | 1.50           |
| Ion-type                | V      | a <sub>1</sub> |         | y <sub>1</sub>   | b <sub>2</sub> | b <sub>3</sub>                         | y <sup>++2</sup>                | y <sup>++8</sup>           | y <sub>4</sub>              |                    | b <sub>6</sub> | y <sub>18</sub> -H <sub>2</sub> O <sup>+3</sup> |                       | y <sub>12</sub> <sup>+2</sup>                                  |                       | y <sub>5</sub> | y <sub>13</sub> <sup>+2</sup> |         | b <sub>7</sub>        | y <sub>15</sub> <sup>+2</sup> |                       | y <sub>16</sub> <sup>+2</sup> | y <sub>17</sub> -H <sub>2</sub> O <sup>+2</sup> | y <sub>17</sub> <sup>+2</sup> | y <sub>8</sub> |
| Delta ppm               | 14.2   | -7.2           | 0.50    | 2.0              | -1.8           | 0.3                                    | 8.7                             | 1.6                        | 18.5                        |                    | -4.0           | 10.6                                            |                       | 2.3                                                            |                       | 1.9            | 2.8                           | -10.8   |                       | -4.0                          |                       | -15.6                         | -10.6                                           | -3.8                          | -2.0           |

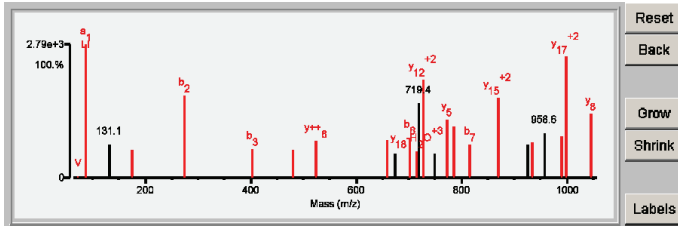

Result Summary

| Rank | Score | SPI (%) | BCS | # Unmatched Ions | Variable sites | Sequence              | MH <sup>+</sup> Calculated (Da) | MH <sup>+</sup> Error (Da) | MH <sup>+</sup> Error (ppm) | Protein MW/pl (Da) | Species | Accession # | Protein Name                                                                   |
|------|-------|---------|-----|------------------|----------------|-----------------------|---------------------------------|----------------------------|-----------------------------|--------------------|---------|-------------|--------------------------------------------------------------------------------|
| 1    | 23.43 | 92.3    | 11  | 3/25             | K53k           | (K)LIYAGKILSDDVPIR(D) | 1672.9632                       | 114.0554                   | 7.0                         | 39609.4/4.56       | HUMAN   | P54725      | UV excision repair protein RAD23 homolog A OS=Homo sapiens GN=RAD23A PE=1 SV=1 |
| 2    | 11.40 | 68.6    | 5   | 11/25            | K502k K506k    | (R)IGKHPAKETVPIR(S)   | 1558.9428                       | 228.0759                   | -5.6                        | 465750.9/5.71      | HUMAN   | RQ86W1      | REVERSE Fibrocytin-L OS=Homo sapiens GN=PKHD1L1 PE=2 SV=1                      |
| 3    | 8.19  | 62.0    | 3   | 13/25            | K193k          | (K)LLKMLGELQVMLEER(R) | 1672.9488                       | 114.0698                   | 15.0                        | 83901.5/6.44       | HUMAN   | RQ9Y4J8     | REVERSE Dystrobrevin alpha OS=Homo sapiens GN=DTNA PE=1 SV=2                   |
| 4    | 5.05  | 59.2    | 2   | 16/25            | M943m K940k    | (K)IikNPmDLSTIKKR(L)  | 1656.9829                       | 130.0357                   | -1.2                        | 116831.9/6.73      | HUMAN   | O15164      | Transcription intermediary factor 1-alpha OS=Homo sapiens GN=TRIM24 PE=1 SV=3  |
| 5    | 4.82  | 55.1    | 2   | 13/25            | K302k          | (R)YSDALLEKkKLMAR(E)  | 1672.9778                       | 114.0408                   | -1.2                        | 43568.3/8.96       | HUMAN   | P28222      | 5-hydroxytryptamine receptor 1B OS=Homo sapiens GN=HTR1B PE=1 SV=1             |

Detailed Results

| Rank                                                                                                                                                                                                                                                                                                                                                                                                                                                                                                                                                                                                                                                                                                                                                                                                                                                                                                                                                                                                                                                                                                                                                                                                                                                                                                                                                                                                                                                                                                                                                                                                                                                                                                                                                                                                                                                                                                                                                                                                                                                                                                                                                                                                                                                                                                                                                                                                                                                                                                                                                                                                                                                                                                                                                                                                                                                                                                                                                                                                                                                                                                                             | Score  | SPI (%) | BCS    | # Unmatched Ions | Variable sites | Sequence              | MH <sup>+</sup> Calculated (Da) | MH <sup>+</sup> Error (Da) | MH <sup>+</sup> Error (ppm) | Protein MW/pl (Da) | Species | Accession # | MS-Digest Index # | Protein Name                                                                   |                    |         |         |                       |                       |         |         |                       |         |         |          |         |         |         |         |         |         |         |                       |                       |         |         |                       |         |         |          |                        |      |      |       |      |      |      |       |      |      |      |      |      |      |      |      |      |      |      |      |      |      |      |      |      |      |                      |      |       |        |      |      |      |       |      |       |      |      |       |      |       |      |       |      |      |      |      |      |       |       |       |       |       |      |       |      |       |      |      |      |       |      |      |      |      |      |      |      |      |      |      |      |      |      |      |      |      |      |          |   |    |    |  |   |    |    |  |    |        |     |    |     |    |      |    |      |    |    |    |    |    |    |    |    |           |       |  |       |  |      |      |       |  |       |     |      |  |     |     |      |       |      |      |      |     |     |     |     |      |      |  |  |  |      |  |  |       |  |  |  |  |        |  |  |  |  |  |  |  |  |  |  |  |  |  |  |  |  |  |      |  |  |       |  |  |       |  |      |  |  |  |  |  |  |  |  |  |  |  |  |  |  |
|----------------------------------------------------------------------------------------------------------------------------------------------------------------------------------------------------------------------------------------------------------------------------------------------------------------------------------------------------------------------------------------------------------------------------------------------------------------------------------------------------------------------------------------------------------------------------------------------------------------------------------------------------------------------------------------------------------------------------------------------------------------------------------------------------------------------------------------------------------------------------------------------------------------------------------------------------------------------------------------------------------------------------------------------------------------------------------------------------------------------------------------------------------------------------------------------------------------------------------------------------------------------------------------------------------------------------------------------------------------------------------------------------------------------------------------------------------------------------------------------------------------------------------------------------------------------------------------------------------------------------------------------------------------------------------------------------------------------------------------------------------------------------------------------------------------------------------------------------------------------------------------------------------------------------------------------------------------------------------------------------------------------------------------------------------------------------------------------------------------------------------------------------------------------------------------------------------------------------------------------------------------------------------------------------------------------------------------------------------------------------------------------------------------------------------------------------------------------------------------------------------------------------------------------------------------------------------------------------------------------------------------------------------------------------------------------------------------------------------------------------------------------------------------------------------------------------------------------------------------------------------------------------------------------------------------------------------------------------------------------------------------------------------------------------------------------------------------------------------------------------------|--------|---------|--------|------------------|----------------|-----------------------|---------------------------------|----------------------------|-----------------------------|--------------------|---------|-------------|-------------------|--------------------------------------------------------------------------------|--------------------|---------|---------|-----------------------|-----------------------|---------|---------|-----------------------|---------|---------|----------|---------|---------|---------|---------|---------|---------|---------|-----------------------|-----------------------|---------|---------|-----------------------|---------|---------|----------|------------------------|------|------|-------|------|------|------|-------|------|------|------|------|------|------|------|------|------|------|------|------|------|------|------|------|------|------|----------------------|------|-------|--------|------|------|------|-------|------|-------|------|------|-------|------|-------|------|-------|------|------|------|------|------|-------|-------|-------|-------|-------|------|-------|------|-------|------|------|------|-------|------|------|------|------|------|------|------|------|------|------|------|------|------|------|------|------|------|----------|---|----|----|--|---|----|----|--|----|--------|-----|----|-----|----|------|----|------|----|----|----|----|----|----|----|----|-----------|-------|--|-------|--|------|------|-------|--|-------|-----|------|--|-----|-----|------|-------|------|------|------|-----|-----|-----|-----|------|------|--|--|--|------|--|--|-------|--|--|--|--|--------|--|--|--|--|--|--|--|--|--|--|--|--|--|--|--|--|--|------|--|--|-------|--|--|-------|--|------|--|--|--|--|--|--|--|--|--|--|--|--|--|--|
| 1                                                                                                                                                                                                                                                                                                                                                                                                                                                                                                                                                                                                                                                                                                                                                                                                                                                                                                                                                                                                                                                                                                                                                                                                                                                                                                                                                                                                                                                                                                                                                                                                                                                                                                                                                                                                                                                                                                                                                                                                                                                                                                                                                                                                                                                                                                                                                                                                                                                                                                                                                                                                                                                                                                                                                                                                                                                                                                                                                                                                                                                                                                                                | 23.43  | 92.3    | 11     | 3/25             | K53k           | (K)LIYAGKILSDDVPIR(D) | 1672.9632                       | 114.0554                   | 7.0                         | 39609.4/4.56       | HUMAN   | P54725      | 562945            | UV excision repair protein RAD23 homolog A OS=Homo sapiens GN=RAD23A PE=1 SV=1 |                    |         |         |                       |                       |         |         |                       |         |         |          |         |         |         |         |         |         |         |                       |                       |         |         |                       |         |         |          |                        |      |      |       |      |      |      |       |      |      |      |      |      |      |      |      |      |      |      |      |      |      |      |      |      |      |                      |      |       |        |      |      |      |       |      |       |      |      |       |      |       |      |       |      |      |      |      |      |       |       |       |       |       |      |       |      |       |      |      |      |       |      |      |      |      |      |      |      |      |      |      |      |      |      |      |      |      |      |          |   |    |    |  |   |    |    |  |    |        |     |    |     |    |      |    |      |    |    |    |    |    |    |    |    |           |       |  |       |  |      |      |       |  |       |     |      |  |     |     |      |       |      |      |      |     |     |     |     |      |      |  |  |  |      |  |  |       |  |  |  |  |        |  |  |  |  |  |  |  |  |  |  |  |  |  |  |  |  |  |      |  |  |       |  |  |       |  |      |  |  |  |  |  |  |  |  |  |  |  |  |  |  |
| <table border="1"> <thead> <tr> <th>Fragment-ion (m/z)</th> <th>72.079</th> <th>84.080</th> <th>86.096</th> <th>87.098</th> <th>136.075</th> <th>175.118</th> <th>199.178</th> <th>200.181</th> <th>227.173</th> <th>368.231</th> <th>371.204</th> <th>385.256</th> <th>413.252</th> <th>484.320</th> <th>534.262</th> <th>599.350</th> <th>647.351</th> <th>663.880<sup>+2</sup></th> <th>699.398<sup>+2</sup></th> <th>714.379</th> <th>760.437</th> <th>780.926<sup>+2</sup></th> <th>801.408</th> <th>914.493</th> <th>1027.579</th> </tr> </thead> <tbody> <tr> <td>Frac. Inten.(% of TIC)</td> <td>0.04</td> <td>4.79</td> <td>24.23</td> <td>1.17</td> <td>0.13</td> <td>1.90</td> <td>13.11</td> <td>1.79</td> <td>3.82</td> <td>1.84</td> <td>1.92</td> <td>6.02</td> <td>1.34</td> <td>4.43</td> <td>1.99</td> <td>2.57</td> <td>1.96</td> <td>1.62</td> <td>1.20</td> <td>1.55</td> <td>1.65</td> <td>5.58</td> <td>5.95</td> <td>5.87</td> <td>3.53</td> </tr> <tr> <td>Rel. Inten.(% of BP)</td> <td>0.18</td> <td>19.76</td> <td>100.00</td> <td>4.83</td> <td>0.53</td> <td>7.86</td> <td>54.11</td> <td>7.38</td> <td>15.77</td> <td>7.59</td> <td>7.94</td> <td>24.84</td> <td>5.53</td> <td>18.28</td> <td>8.20</td> <td>10.63</td> <td>8.10</td> <td>6.69</td> <td>4.94</td> <td>6.38</td> <td>6.80</td> <td>23.02</td> <td>24.54</td> <td>24.23</td> <td>14.58</td> </tr> <tr> <td>Score</td> <td>0.50</td> <td>-0.20</td> <td>1.00</td> <td>-0.05</td> <td>1.00</td> <td>1.50</td> <td>0.50</td> <td>-0.07</td> <td>0.75</td> <td>0.50</td> <td>0.75</td> <td>1.50</td> <td>0.75</td> <td>1.50</td> <td>0.75</td> <td>1.50</td> <td>0.75</td> <td>1.50</td> <td>1.50</td> <td>1.50</td> <td>0.50</td> <td>1.50</td> <td>1.50</td> <td>1.50</td> <td>1.50</td> </tr> <tr> <td>Ion-type</td> <td>V</td> <td>a1</td> <td>a1</td> <td></td> <td>Y</td> <td>y1</td> <td>a2</td> <td></td> <td>b2</td> <td>y3-NH3</td> <td>AGk</td> <td>y3</td> <td>Gk1</td> <td>y4</td> <td>YAGk</td> <td>y5</td> <td>YAGk</td> <td>+2</td> <td>+2</td> <td>y6</td> <td>b6</td> <td>+2</td> <td>y7</td> <td>y8</td> <td>y9</td> </tr> <tr> <td>Delta ppm</td> <td>-24.6</td> <td></td> <td>-20.0</td> <td></td> <td>-2.1</td> <td>-5.4</td> <td>-16.0</td> <td></td> <td>-13.2</td> <td>4.3</td> <td>-3.1</td> <td></td> <td>1.1</td> <td>1.5</td> <td>-7.8</td> <td>-11.2</td> <td>-2.4</td> <td>-1.8</td> <td>11.1</td> <td>9.9</td> <td>0.6</td> <td>1.3</td> <td>4.0</td> <td>-2.5</td> <td>-1.1</td> </tr> <tr> <td></td> <td></td> <td></td> <td>0.50</td> <td></td> <td></td> <td>IL-28</td> <td></td> <td></td> <td></td> <td></td> <td>Gk1-28</td> <td></td> </tr> <tr> <td></td> <td></td> <td></td> <td>-7.3</td> <td></td> <td></td> <td>-16.0</td> <td></td> <td></td> <td>-13.2</td> <td></td> <td>-1.8</td> <td></td> </tr> </tbody> </table> |        |         |        |                  |                |                       |                                 |                            |                             |                    |         |             |                   |                                                                                | Fragment-ion (m/z) | 72.079  | 84.080  | 86.096                | 87.098                | 136.075 | 175.118 | 199.178               | 200.181 | 227.173 | 368.231  | 371.204 | 385.256 | 413.252 | 484.320 | 534.262 | 599.350 | 647.351 | 663.880 <sup>+2</sup> | 699.398 <sup>+2</sup> | 714.379 | 760.437 | 780.926 <sup>+2</sup> | 801.408 | 914.493 | 1027.579 | Frac. Inten.(% of TIC) | 0.04 | 4.79 | 24.23 | 1.17 | 0.13 | 1.90 | 13.11 | 1.79 | 3.82 | 1.84 | 1.92 | 6.02 | 1.34 | 4.43 | 1.99 | 2.57 | 1.96 | 1.62 | 1.20 | 1.55 | 1.65 | 5.58 | 5.95 | 5.87 | 3.53 | Rel. Inten.(% of BP) | 0.18 | 19.76 | 100.00 | 4.83 | 0.53 | 7.86 | 54.11 | 7.38 | 15.77 | 7.59 | 7.94 | 24.84 | 5.53 | 18.28 | 8.20 | 10.63 | 8.10 | 6.69 | 4.94 | 6.38 | 6.80 | 23.02 | 24.54 | 24.23 | 14.58 | Score | 0.50 | -0.20 | 1.00 | -0.05 | 1.00 | 1.50 | 0.50 | -0.07 | 0.75 | 0.50 | 0.75 | 1.50 | 0.75 | 1.50 | 0.75 | 1.50 | 0.75 | 1.50 | 1.50 | 1.50 | 0.50 | 1.50 | 1.50 | 1.50 | 1.50 | Ion-type | V | a1 | a1 |  | Y | y1 | a2 |  | b2 | y3-NH3 | AGk | y3 | Gk1 | y4 | YAGk | y5 | YAGk | +2 | +2 | y6 | b6 | +2 | y7 | y8 | y9 | Delta ppm | -24.6 |  | -20.0 |  | -2.1 | -5.4 | -16.0 |  | -13.2 | 4.3 | -3.1 |  | 1.1 | 1.5 | -7.8 | -11.2 | -2.4 | -1.8 | 11.1 | 9.9 | 0.6 | 1.3 | 4.0 | -2.5 | -1.1 |  |  |  | 0.50 |  |  | IL-28 |  |  |  |  | Gk1-28 |  |  |  |  |  |  |  |  |  |  |  |  |  |  |  |  |  | -7.3 |  |  | -16.0 |  |  | -13.2 |  | -1.8 |  |  |  |  |  |  |  |  |  |  |  |  |  |  |
| Fragment-ion (m/z)                                                                                                                                                                                                                                                                                                                                                                                                                                                                                                                                                                                                                                                                                                                                                                                                                                                                                                                                                                                                                                                                                                                                                                                                                                                                                                                                                                                                                                                                                                                                                                                                                                                                                                                                                                                                                                                                                                                                                                                                                                                                                                                                                                                                                                                                                                                                                                                                                                                                                                                                                                                                                                                                                                                                                                                                                                                                                                                                                                                                                                                                                                               | 72.079 | 84.080  | 86.096 | 87.098           | 136.075        | 175.118               | 199.178                         | 200.181                    | 227.173                     | 368.231            | 371.204 | 385.256     | 413.252           | 484.320                                                                        | 534.262            | 599.350 | 647.351 | 663.880 <sup>+2</sup> | 699.398 <sup>+2</sup> | 714.379 | 760.437 | 780.926 <sup>+2</sup> | 801.408 | 914.493 | 1027.579 |         |         |         |         |         |         |         |                       |                       |         |         |                       |         |         |          |                        |      |      |       |      |      |      |       |      |      |      |      |      |      |      |      |      |      |      |      |      |      |      |      |      |      |                      |      |       |        |      |      |      |       |      |       |      |      |       |      |       |      |       |      |      |      |      |      |       |       |       |       |       |      |       |      |       |      |      |      |       |      |      |      |      |      |      |      |      |      |      |      |      |      |      |      |      |      |          |   |    |    |  |   |    |    |  |    |        |     |    |     |    |      |    |      |    |    |    |    |    |    |    |    |           |       |  |       |  |      |      |       |  |       |     |      |  |     |     |      |       |      |      |      |     |     |     |     |      |      |  |  |  |      |  |  |       |  |  |  |  |        |  |  |  |  |  |  |  |  |  |  |  |  |  |  |  |  |  |      |  |  |       |  |  |       |  |      |  |  |  |  |  |  |  |  |  |  |  |  |  |  |
| Frac. Inten.(% of TIC)                                                                                                                                                                                                                                                                                                                                                                                                                                                                                                                                                                                                                                                                                                                                                                                                                                                                                                                                                                                                                                                                                                                                                                                                                                                                                                                                                                                                                                                                                                                                                                                                                                                                                                                                                                                                                                                                                                                                                                                                                                                                                                                                                                                                                                                                                                                                                                                                                                                                                                                                                                                                                                                                                                                                                                                                                                                                                                                                                                                                                                                                                                           | 0.04   | 4.79    | 24.23  | 1.17             | 0.13           | 1.90                  | 13.11                           | 1.79                       | 3.82                        | 1.84               | 1.92    | 6.02        | 1.34              | 4.43                                                                           | 1.99               | 2.57    | 1.96    | 1.62                  | 1.20                  | 1.55    | 1.65    | 5.58                  | 5.95    | 5.87    | 3.53     |         |         |         |         |         |         |         |                       |                       |         |         |                       |         |         |          |                        |      |      |       |      |      |      |       |      |      |      |      |      |      |      |      |      |      |      |      |      |      |      |      |      |      |                      |      |       |        |      |      |      |       |      |       |      |      |       |      |       |      |       |      |      |      |      |      |       |       |       |       |       |      |       |      |       |      |      |      |       |      |      |      |      |      |      |      |      |      |      |      |      |      |      |      |      |      |          |   |    |    |  |   |    |    |  |    |        |     |    |     |    |      |    |      |    |    |    |    |    |    |    |    |           |       |  |       |  |      |      |       |  |       |     |      |  |     |     |      |       |      |      |      |     |     |     |     |      |      |  |  |  |      |  |  |       |  |  |  |  |        |  |  |  |  |  |  |  |  |  |  |  |  |  |  |  |  |  |      |  |  |       |  |  |       |  |      |  |  |  |  |  |  |  |  |  |  |  |  |  |  |
| Rel. Inten.(% of BP)                                                                                                                                                                                                                                                                                                                                                                                                                                                                                                                                                                                                                                                                                                                                                                                                                                                                                                                                                                                                                                                                                                                                                                                                                                                                                                                                                                                                                                                                                                                                                                                                                                                                                                                                                                                                                                                                                                                                                                                                                                                                                                                                                                                                                                                                                                                                                                                                                                                                                                                                                                                                                                                                                                                                                                                                                                                                                                                                                                                                                                                                                                             | 0.18   | 19.76   | 100.00 | 4.83             | 0.53           | 7.86                  | 54.11                           | 7.38                       | 15.77                       | 7.59               | 7.94    | 24.84       | 5.53              | 18.28                                                                          | 8.20               | 10.63   | 8.10    | 6.69                  | 4.94                  | 6.38    | 6.80    | 23.02                 | 24.54   | 24.23   | 14.58    |         |         |         |         |         |         |         |                       |                       |         |         |                       |         |         |          |                        |      |      |       |      |      |      |       |      |      |      |      |      |      |      |      |      |      |      |      |      |      |      |      |      |      |                      |      |       |        |      |      |      |       |      |       |      |      |       |      |       |      |       |      |      |      |      |      |       |       |       |       |       |      |       |      |       |      |      |      |       |      |      |      |      |      |      |      |      |      |      |      |      |      |      |      |      |      |          |   |    |    |  |   |    |    |  |    |        |     |    |     |    |      |    |      |    |    |    |    |    |    |    |    |           |       |  |       |  |      |      |       |  |       |     |      |  |     |     |      |       |      |      |      |     |     |     |     |      |      |  |  |  |      |  |  |       |  |  |  |  |        |  |  |  |  |  |  |  |  |  |  |  |  |  |  |  |  |  |      |  |  |       |  |  |       |  |      |  |  |  |  |  |  |  |  |  |  |  |  |  |  |
| Score                                                                                                                                                                                                                                                                                                                                                                                                                                                                                                                                                                                                                                                                                                                                                                                                                                                                                                                                                                                                                                                                                                                                                                                                                                                                                                                                                                                                                                                                                                                                                                                                                                                                                                                                                                                                                                                                                                                                                                                                                                                                                                                                                                                                                                                                                                                                                                                                                                                                                                                                                                                                                                                                                                                                                                                                                                                                                                                                                                                                                                                                                                                            | 0.50   | -0.20   | 1.00   | -0.05            | 1.00           | 1.50                  | 0.50                            | -0.07                      | 0.75                        | 0.50               | 0.75    | 1.50        | 0.75              | 1.50                                                                           | 0.75               | 1.50    | 0.75    | 1.50                  | 1.50                  | 1.50    | 0.50    | 1.50                  | 1.50    | 1.50    | 1.50     |         |         |         |         |         |         |         |                       |                       |         |         |                       |         |         |          |                        |      |      |       |      |      |      |       |      |      |      |      |      |      |      |      |      |      |      |      |      |      |      |      |      |      |                      |      |       |        |      |      |      |       |      |       |      |      |       |      |       |      |       |      |      |      |      |      |       |       |       |       |       |      |       |      |       |      |      |      |       |      |      |      |      |      |      |      |      |      |      |      |      |      |      |      |      |      |          |   |    |    |  |   |    |    |  |    |        |     |    |     |    |      |    |      |    |    |    |    |    |    |    |    |           |       |  |       |  |      |      |       |  |       |     |      |  |     |     |      |       |      |      |      |     |     |     |     |      |      |  |  |  |      |  |  |       |  |  |  |  |        |  |  |  |  |  |  |  |  |  |  |  |  |  |  |  |  |  |      |  |  |       |  |  |       |  |      |  |  |  |  |  |  |  |  |  |  |  |  |  |  |
| Ion-type                                                                                                                                                                                                                                                                                                                                                                                                                                                                                                                                                                                                                                                                                                                                                                                                                                                                                                                                                                                                                                                                                                                                                                                                                                                                                                                                                                                                                                                                                                                                                                                                                                                                                                                                                                                                                                                                                                                                                                                                                                                                                                                                                                                                                                                                                                                                                                                                                                                                                                                                                                                                                                                                                                                                                                                                                                                                                                                                                                                                                                                                                                                         | V      | a1      | a1     |                  | Y              | y1                    | a2                              |                            | b2                          | y3-NH3             | AGk     | y3          | Gk1               | y4                                                                             | YAGk               | y5      | YAGk    | +2                    | +2                    | y6      | b6      | +2                    | y7      | y8      | y9       |         |         |         |         |         |         |         |                       |                       |         |         |                       |         |         |          |                        |      |      |       |      |      |      |       |      |      |      |      |      |      |      |      |      |      |      |      |      |      |      |      |      |      |                      |      |       |        |      |      |      |       |      |       |      |      |       |      |       |      |       |      |      |      |      |      |       |       |       |       |       |      |       |      |       |      |      |      |       |      |      |      |      |      |      |      |      |      |      |      |      |      |      |      |      |      |          |   |    |    |  |   |    |    |  |    |        |     |    |     |    |      |    |      |    |    |    |    |    |    |    |    |           |       |  |       |  |      |      |       |  |       |     |      |  |     |     |      |       |      |      |      |     |     |     |     |      |      |  |  |  |      |  |  |       |  |  |  |  |        |  |  |  |  |  |  |  |  |  |  |  |  |  |  |  |  |  |      |  |  |       |  |  |       |  |      |  |  |  |  |  |  |  |  |  |  |  |  |  |  |
| Delta ppm                                                                                                                                                                                                                                                                                                                                                                                                                                                                                                                                                                                                                                                                                                                                                                                                                                                                                                                                                                                                                                                                                                                                                                                                                                                                                                                                                                                                                                                                                                                                                                                                                                                                                                                                                                                                                                                                                                                                                                                                                                                                                                                                                                                                                                                                                                                                                                                                                                                                                                                                                                                                                                                                                                                                                                                                                                                                                                                                                                                                                                                                                                                        | -24.6  |         | -20.0  |                  | -2.1           | -5.4                  | -16.0                           |                            | -13.2                       | 4.3                | -3.1    |             | 1.1               | 1.5                                                                            | -7.8               | -11.2   | -2.4    | -1.8                  | 11.1                  | 9.9     | 0.6     | 1.3                   | 4.0     | -2.5    | -1.1     |         |         |         |         |         |         |         |                       |                       |         |         |                       |         |         |          |                        |      |      |       |      |      |      |       |      |      |      |      |      |      |      |      |      |      |      |      |      |      |      |      |      |      |                      |      |       |        |      |      |      |       |      |       |      |      |       |      |       |      |       |      |      |      |      |      |       |       |       |       |       |      |       |      |       |      |      |      |       |      |      |      |      |      |      |      |      |      |      |      |      |      |      |      |      |      |          |   |    |    |  |   |    |    |  |    |        |     |    |     |    |      |    |      |    |    |    |    |    |    |    |    |           |       |  |       |  |      |      |       |  |       |     |      |  |     |     |      |       |      |      |      |     |     |     |     |      |      |  |  |  |      |  |  |       |  |  |  |  |        |  |  |  |  |  |  |  |  |  |  |  |  |  |  |  |  |  |      |  |  |       |  |  |       |  |      |  |  |  |  |  |  |  |  |  |  |  |  |  |  |
|                                                                                                                                                                                                                                                                                                                                                                                                                                                                                                                                                                                                                                                                                                                                                                                                                                                                                                                                                                                                                                                                                                                                                                                                                                                                                                                                                                                                                                                                                                                                                                                                                                                                                                                                                                                                                                                                                                                                                                                                                                                                                                                                                                                                                                                                                                                                                                                                                                                                                                                                                                                                                                                                                                                                                                                                                                                                                                                                                                                                                                                                                                                                  |        |         | 0.50   |                  |                | IL-28                 |                                 |                            |                             |                    | Gk1-28  |             |                   |                                                                                |                    |         |         |                       |                       |         |         |                       |         |         |          |         |         |         |         |         |         |         |                       |                       |         |         |                       |         |         |          |                        |      |      |       |      |      |      |       |      |      |      |      |      |      |      |      |      |      |      |      |      |      |      |      |      |      |                      |      |       |        |      |      |      |       |      |       |      |      |       |      |       |      |       |      |      |      |      |      |       |       |       |       |       |      |       |      |       |      |      |      |       |      |      |      |      |      |      |      |      |      |      |      |      |      |      |      |      |      |          |   |    |    |  |   |    |    |  |    |        |     |    |     |    |      |    |      |    |    |    |    |    |    |    |    |           |       |  |       |  |      |      |       |  |       |     |      |  |     |     |      |       |      |      |      |     |     |     |     |      |      |  |  |  |      |  |  |       |  |  |  |  |        |  |  |  |  |  |  |  |  |  |  |  |  |  |  |  |  |  |      |  |  |       |  |  |       |  |      |  |  |  |  |  |  |  |  |  |  |  |  |  |  |
|                                                                                                                                                                                                                                                                                                                                                                                                                                                                                                                                                                                                                                                                                                                                                                                                                                                                                                                                                                                                                                                                                                                                                                                                                                                                                                                                                                                                                                                                                                                                                                                                                                                                                                                                                                                                                                                                                                                                                                                                                                                                                                                                                                                                                                                                                                                                                                                                                                                                                                                                                                                                                                                                                                                                                                                                                                                                                                                                                                                                                                                                                                                                  |        |         | -7.3   |                  |                | -16.0                 |                                 |                            | -13.2                       |                    | -1.8    |             |                   |                                                                                |                    |         |         |                       |                       |         |         |                       |         |         |          |         |         |         |         |         |         |         |                       |                       |         |         |                       |         |         |          |                        |      |      |       |      |      |      |       |      |      |      |      |      |      |      |      |      |      |      |      |      |      |      |      |      |      |                      |      |       |        |      |      |      |       |      |       |      |      |       |      |       |      |       |      |      |      |      |      |       |       |       |       |       |      |       |      |       |      |      |      |       |      |      |      |      |      |      |      |      |      |      |      |      |      |      |      |      |      |          |   |    |    |  |   |    |    |  |    |        |     |    |     |    |      |    |      |    |    |    |    |    |    |    |    |           |       |  |       |  |      |      |       |  |       |     |      |  |     |     |      |       |      |      |      |     |     |     |     |      |      |  |  |  |      |  |  |       |  |  |  |  |        |  |  |  |  |  |  |  |  |  |  |  |  |  |  |  |  |  |      |  |  |       |  |  |       |  |      |  |  |  |  |  |  |  |  |  |  |  |  |  |  |

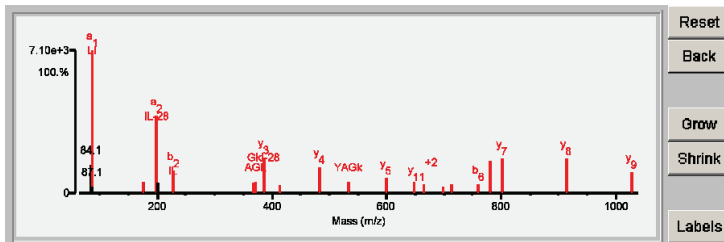

Result Summary

| Rank | Score | SPI (%) | BCS | # Unmatched Ions | Variable sites | Sequence            | MH <sup>+</sup> Calculated (Da) | MH <sup>+</sup> Error (Da) | MH <sup>+</sup> Error (ppm) | Protein MW/pi (Da) | Species | Accession # | Protein Name                                                                   |
|------|-------|---------|-----|------------------|----------------|---------------------|---------------------------------|----------------------------|-----------------------------|--------------------|---------|-------------|--------------------------------------------------------------------------------|
| 1    | 17.05 | 81.8    | 7   | 6/25             | K24k           | (K)IDIDPEETVKALK(E) | 1470.8050                       | 114.0502                   | 4.6                         | 43171.4/4.79       | HUMAN   | P54727      | UV excision repair protein RAD23 homolog B OS=Homo sapiens GN=RAD23B PE=1 SV=1 |
| 2    | 12.33 | 68.8    | 6   | 10/25            | K27k           | (K)IDIDPEETVKALK(E) | 1470.8050                       | 114.0502                   | 4.6                         | 43171.4/4.79       | HUMAN   | P54727      | UV excision repair protein RAD23 homolog B OS=Homo sapiens GN=RAD23B PE=1 SV=1 |

Detailed Results

| Rank                                                                                                                                                                                                                                                                                                                                                                                                                                                                                                                                                                                                                                                                                                                                                                                                                                                                                                                                                                                                                                                                                                                                                                                                                                                                                                                                                                                                                                                                                                                                                                                                                                                                                                                                                                                                                                                                                                                                                                                                                                                                                                                                                                                                                                                                                                                                                                                                                                                                                                                                                                                                                                                                | Score  | SPI (%) | BCS              | # Unmatched Ions | Variable sites | Sequence                                      | MH <sup>+</sup> Calculated (Da) | MH <sup>+</sup> Error (Da) | MH <sup>+</sup> Error (ppm) | Protein MW/pi (Da) | Species | Accession # | MS-Digest Index # | Protein Name                                                                   |                    |         |         |                |                       |                              |                |         |                |                |                |         |         |         |         |         |         |         |         |                       |                       |         |         |         |         |          |                         |      |      |      |      |       |      |      |      |      |      |      |      |      |      |      |      |      |      |      |      |      |      |      |      |      |                       |      |      |      |      |        |      |       |       |       |      |       |       |       |      |      |      |       |      |      |       |       |       |       |      |      |       |      |      |      |      |      |      |      |      |       |       |      |      |      |       |      |      |       |      |       |      |      |       |      |      |      |          |    |   |                  |    |                |   |                                 |                |  |  |       |    |                |  |     |     |  |                |  |                              |                |  |                |                |                |           |       |      |     |       |       |       |       |      |  |  |       |       |     |      |       |  |       |  |  |      |      |  |      |      |      |
|---------------------------------------------------------------------------------------------------------------------------------------------------------------------------------------------------------------------------------------------------------------------------------------------------------------------------------------------------------------------------------------------------------------------------------------------------------------------------------------------------------------------------------------------------------------------------------------------------------------------------------------------------------------------------------------------------------------------------------------------------------------------------------------------------------------------------------------------------------------------------------------------------------------------------------------------------------------------------------------------------------------------------------------------------------------------------------------------------------------------------------------------------------------------------------------------------------------------------------------------------------------------------------------------------------------------------------------------------------------------------------------------------------------------------------------------------------------------------------------------------------------------------------------------------------------------------------------------------------------------------------------------------------------------------------------------------------------------------------------------------------------------------------------------------------------------------------------------------------------------------------------------------------------------------------------------------------------------------------------------------------------------------------------------------------------------------------------------------------------------------------------------------------------------------------------------------------------------------------------------------------------------------------------------------------------------------------------------------------------------------------------------------------------------------------------------------------------------------------------------------------------------------------------------------------------------------------------------------------------------------------------------------------------------|--------|---------|------------------|------------------|----------------|-----------------------------------------------|---------------------------------|----------------------------|-----------------------------|--------------------|---------|-------------|-------------------|--------------------------------------------------------------------------------|--------------------|---------|---------|----------------|-----------------------|------------------------------|----------------|---------|----------------|----------------|----------------|---------|---------|---------|---------|---------|---------|---------|---------|-----------------------|-----------------------|---------|---------|---------|---------|----------|-------------------------|------|------|------|------|-------|------|------|------|------|------|------|------|------|------|------|------|------|------|------|------|------|------|------|------|------|-----------------------|------|------|------|------|--------|------|-------|-------|-------|------|-------|-------|-------|------|------|------|-------|------|------|-------|-------|-------|-------|------|------|-------|------|------|------|------|------|------|------|------|-------|-------|------|------|------|-------|------|------|-------|------|-------|------|------|-------|------|------|------|----------|----|---|------------------|----|----------------|---|---------------------------------|----------------|--|--|-------|----|----------------|--|-----|-----|--|----------------|--|------------------------------|----------------|--|----------------|----------------|----------------|-----------|-------|------|-----|-------|-------|-------|-------|------|--|--|-------|-------|-----|------|-------|--|-------|--|--|------|------|--|------|------|------|
| 1                                                                                                                                                                                                                                                                                                                                                                                                                                                                                                                                                                                                                                                                                                                                                                                                                                                                                                                                                                                                                                                                                                                                                                                                                                                                                                                                                                                                                                                                                                                                                                                                                                                                                                                                                                                                                                                                                                                                                                                                                                                                                                                                                                                                                                                                                                                                                                                                                                                                                                                                                                                                                                                                   | 17.05  | 81.8    | 7                | 6/25             | K24k           | (K) I D I D I P / E / E / T V / k A L / K (E) | 1470.8050                       | 114.0502                   | 4.6                         | 43171.4/4.79       | HUMAN   | P54727      | 562953            | UV excision repair protein RAD23 homolog B OS=Homo sapiens GN=RAD23B PE=1 SV=1 |                    |         |         |                |                       |                              |                |         |                |                |                |         |         |         |         |         |         |         |         |                       |                       |         |         |         |         |          |                         |      |      |      |      |       |      |      |      |      |      |      |      |      |      |      |      |      |      |      |      |      |      |      |      |      |                       |      |      |      |      |        |      |       |       |       |      |       |       |       |      |      |      |       |      |      |       |       |       |       |      |      |       |      |      |      |      |      |      |      |      |       |       |      |      |      |       |      |      |       |      |       |      |      |       |      |      |      |          |    |   |                  |    |                |   |                                 |                |  |  |       |    |                |  |     |     |  |                |  |                              |                |  |                |                |                |           |       |      |     |       |       |       |       |      |  |  |       |       |     |      |       |  |       |  |  |      |      |  |      |      |      |
| <table border="1"> <thead> <tr> <th>Fragment-ion (m/z)</th> <th>70.064</th> <th>72.082</th> <th>74.060</th> <th>84.079</th> <th>86.096</th> <th>102.053</th> <th>130.083</th> <th>147.114</th> <th>183.117</th> <th>185.084</th> <th>199.106</th> <th>227.100</th> <th>229.121</th> <th>230.113</th> <th>356.151</th> <th>427.260</th> <th>439.174</th> <th>457.216</th> <th>555.287<sup>+2</sup></th> <th>564.813<sup>+2</sup></th> <th>573.378</th> <th>672.473</th> <th>773.481</th> <th>902.557</th> <th>1031.609</th> </tr> </thead> <tbody> <tr> <td>Frac. Inten. (% of TIC)</td> <td>0.01</td> <td>0.10</td> <td>2.24</td> <td>0.37</td> <td>27.95</td> <td>0.09</td> <td>5.23</td> <td>3.13</td> <td>3.42</td> <td>2.22</td> <td>6.92</td> <td>3.59</td> <td>4.92</td> <td>2.60</td> <td>2.37</td> <td>2.40</td> <td>4.78</td> <td>2.58</td> <td>2.23</td> <td>8.12</td> <td>4.10</td> <td>2.96</td> <td>2.91</td> <td>2.48</td> <td>2.26</td> </tr> <tr> <td>Rel. Inten. (% of BP)</td> <td>0.03</td> <td>0.36</td> <td>8.00</td> <td>1.33</td> <td>100.00</td> <td>0.34</td> <td>18.71</td> <td>11.21</td> <td>12.24</td> <td>7.95</td> <td>24.76</td> <td>12.86</td> <td>17.61</td> <td>9.31</td> <td>8.48</td> <td>8.60</td> <td>17.10</td> <td>9.23</td> <td>7.98</td> <td>29.04</td> <td>14.68</td> <td>10.58</td> <td>10.40</td> <td>8.88</td> <td>8.07</td> </tr> <tr> <td>Score</td> <td>0.20</td> <td>0.50</td> <td>1.50</td> <td>0.50</td> <td>0.50</td> <td>1.00</td> <td>0.50</td> <td>1.50</td> <td>-0.12</td> <td>-0.08</td> <td>0.50</td> <td>0.75</td> <td>0.75</td> <td>-0.09</td> <td>0.75</td> <td>0.75</td> <td>-0.17</td> <td>0.50</td> <td>-0.08</td> <td>1.50</td> <td>1.50</td> <td>-0.11</td> <td>1.50</td> <td>1.50</td> <td>1.50</td> </tr> <tr> <td>Ion-type</td> <td>PR</td> <td>V</td> <td>Y<sup>++1</sup></td> <td>KQ</td> <td>a<sub>1</sub></td> <td>E</td> <td>Y<sub>1</sub>-NH<sub>3</sub></td> <td>Y<sub>1</sub></td> <td></td> <td></td> <td>PE-28</td> <td>PE</td> <td>b<sub>2</sub></td> <td></td> <td>PEE</td> <td>kAL</td> <td></td> <td>b<sub>4</sub></td> <td></td> <td>Y<sub>9</sub><sup>+2</sup></td> <td>Y<sub>4</sub></td> <td></td> <td>Y<sub>6</sub></td> <td>Y<sub>7</sub></td> <td>Y<sub>8</sub></td> </tr> <tr> <td>Delta ppm</td> <td>-21.8</td> <td>22.5</td> <td>3.5</td> <td>-17.5</td> <td>-21.2</td> <td>-16.2</td> <td>-26.6</td> <td>11.5</td> <td></td> <td></td> <td>-16.2</td> <td>-14.7</td> <td>5.8</td> <td>12.6</td> <td>-16.2</td> <td></td> <td>-31.7</td> <td></td> <td></td> <td>-5.5</td> <td>11.2</td> <td></td> <td>-9.1</td> <td>29.3</td> <td>34.7</td> </tr> </tbody> </table> |        |         |                  |                  |                |                                               |                                 |                            |                             |                    |         |             |                   |                                                                                | Fragment-ion (m/z) | 70.064  | 72.082  | 74.060         | 84.079                | 86.096                       | 102.053        | 130.083 | 147.114        | 183.117        | 185.084        | 199.106 | 227.100 | 229.121 | 230.113 | 356.151 | 427.260 | 439.174 | 457.216 | 555.287 <sup>+2</sup> | 564.813 <sup>+2</sup> | 573.378 | 672.473 | 773.481 | 902.557 | 1031.609 | Frac. Inten. (% of TIC) | 0.01 | 0.10 | 2.24 | 0.37 | 27.95 | 0.09 | 5.23 | 3.13 | 3.42 | 2.22 | 6.92 | 3.59 | 4.92 | 2.60 | 2.37 | 2.40 | 4.78 | 2.58 | 2.23 | 8.12 | 4.10 | 2.96 | 2.91 | 2.48 | 2.26 | Rel. Inten. (% of BP) | 0.03 | 0.36 | 8.00 | 1.33 | 100.00 | 0.34 | 18.71 | 11.21 | 12.24 | 7.95 | 24.76 | 12.86 | 17.61 | 9.31 | 8.48 | 8.60 | 17.10 | 9.23 | 7.98 | 29.04 | 14.68 | 10.58 | 10.40 | 8.88 | 8.07 | Score | 0.20 | 0.50 | 1.50 | 0.50 | 0.50 | 1.00 | 0.50 | 1.50 | -0.12 | -0.08 | 0.50 | 0.75 | 0.75 | -0.09 | 0.75 | 0.75 | -0.17 | 0.50 | -0.08 | 1.50 | 1.50 | -0.11 | 1.50 | 1.50 | 1.50 | Ion-type | PR | V | Y <sup>++1</sup> | KQ | a <sub>1</sub> | E | Y <sub>1</sub> -NH <sub>3</sub> | Y <sub>1</sub> |  |  | PE-28 | PE | b <sub>2</sub> |  | PEE | kAL |  | b <sub>4</sub> |  | Y <sub>9</sub> <sup>+2</sup> | Y <sub>4</sub> |  | Y <sub>6</sub> | Y <sub>7</sub> | Y <sub>8</sub> | Delta ppm | -21.8 | 22.5 | 3.5 | -17.5 | -21.2 | -16.2 | -26.6 | 11.5 |  |  | -16.2 | -14.7 | 5.8 | 12.6 | -16.2 |  | -31.7 |  |  | -5.5 | 11.2 |  | -9.1 | 29.3 | 34.7 |
| Fragment-ion (m/z)                                                                                                                                                                                                                                                                                                                                                                                                                                                                                                                                                                                                                                                                                                                                                                                                                                                                                                                                                                                                                                                                                                                                                                                                                                                                                                                                                                                                                                                                                                                                                                                                                                                                                                                                                                                                                                                                                                                                                                                                                                                                                                                                                                                                                                                                                                                                                                                                                                                                                                                                                                                                                                                  | 70.064 | 72.082  | 74.060           | 84.079           | 86.096         | 102.053                                       | 130.083                         | 147.114                    | 183.117                     | 185.084            | 199.106 | 227.100     | 229.121           | 230.113                                                                        | 356.151            | 427.260 | 439.174 | 457.216        | 555.287 <sup>+2</sup> | 564.813 <sup>+2</sup>        | 573.378        | 672.473 | 773.481        | 902.557        | 1031.609       |         |         |         |         |         |         |         |         |                       |                       |         |         |         |         |          |                         |      |      |      |      |       |      |      |      |      |      |      |      |      |      |      |      |      |      |      |      |      |      |      |      |      |                       |      |      |      |      |        |      |       |       |       |      |       |       |       |      |      |      |       |      |      |       |       |       |       |      |      |       |      |      |      |      |      |      |      |      |       |       |      |      |      |       |      |      |       |      |       |      |      |       |      |      |      |          |    |   |                  |    |                |   |                                 |                |  |  |       |    |                |  |     |     |  |                |  |                              |                |  |                |                |                |           |       |      |     |       |       |       |       |      |  |  |       |       |     |      |       |  |       |  |  |      |      |  |      |      |      |
| Frac. Inten. (% of TIC)                                                                                                                                                                                                                                                                                                                                                                                                                                                                                                                                                                                                                                                                                                                                                                                                                                                                                                                                                                                                                                                                                                                                                                                                                                                                                                                                                                                                                                                                                                                                                                                                                                                                                                                                                                                                                                                                                                                                                                                                                                                                                                                                                                                                                                                                                                                                                                                                                                                                                                                                                                                                                                             | 0.01   | 0.10    | 2.24             | 0.37             | 27.95          | 0.09                                          | 5.23                            | 3.13                       | 3.42                        | 2.22               | 6.92    | 3.59        | 4.92              | 2.60                                                                           | 2.37               | 2.40    | 4.78    | 2.58           | 2.23                  | 8.12                         | 4.10           | 2.96    | 2.91           | 2.48           | 2.26           |         |         |         |         |         |         |         |         |                       |                       |         |         |         |         |          |                         |      |      |      |      |       |      |      |      |      |      |      |      |      |      |      |      |      |      |      |      |      |      |      |      |      |                       |      |      |      |      |        |      |       |       |       |      |       |       |       |      |      |      |       |      |      |       |       |       |       |      |      |       |      |      |      |      |      |      |      |      |       |       |      |      |      |       |      |      |       |      |       |      |      |       |      |      |      |          |    |   |                  |    |                |   |                                 |                |  |  |       |    |                |  |     |     |  |                |  |                              |                |  |                |                |                |           |       |      |     |       |       |       |       |      |  |  |       |       |     |      |       |  |       |  |  |      |      |  |      |      |      |
| Rel. Inten. (% of BP)                                                                                                                                                                                                                                                                                                                                                                                                                                                                                                                                                                                                                                                                                                                                                                                                                                                                                                                                                                                                                                                                                                                                                                                                                                                                                                                                                                                                                                                                                                                                                                                                                                                                                                                                                                                                                                                                                                                                                                                                                                                                                                                                                                                                                                                                                                                                                                                                                                                                                                                                                                                                                                               | 0.03   | 0.36    | 8.00             | 1.33             | 100.00         | 0.34                                          | 18.71                           | 11.21                      | 12.24                       | 7.95               | 24.76   | 12.86       | 17.61             | 9.31                                                                           | 8.48               | 8.60    | 17.10   | 9.23           | 7.98                  | 29.04                        | 14.68          | 10.58   | 10.40          | 8.88           | 8.07           |         |         |         |         |         |         |         |         |                       |                       |         |         |         |         |          |                         |      |      |      |      |       |      |      |      |      |      |      |      |      |      |      |      |      |      |      |      |      |      |      |      |      |                       |      |      |      |      |        |      |       |       |       |      |       |       |       |      |      |      |       |      |      |       |       |       |       |      |      |       |      |      |      |      |      |      |      |      |       |       |      |      |      |       |      |      |       |      |       |      |      |       |      |      |      |          |    |   |                  |    |                |   |                                 |                |  |  |       |    |                |  |     |     |  |                |  |                              |                |  |                |                |                |           |       |      |     |       |       |       |       |      |  |  |       |       |     |      |       |  |       |  |  |      |      |  |      |      |      |
| Score                                                                                                                                                                                                                                                                                                                                                                                                                                                                                                                                                                                                                                                                                                                                                                                                                                                                                                                                                                                                                                                                                                                                                                                                                                                                                                                                                                                                                                                                                                                                                                                                                                                                                                                                                                                                                                                                                                                                                                                                                                                                                                                                                                                                                                                                                                                                                                                                                                                                                                                                                                                                                                                               | 0.20   | 0.50    | 1.50             | 0.50             | 0.50           | 1.00                                          | 0.50                            | 1.50                       | -0.12                       | -0.08              | 0.50    | 0.75        | 0.75              | -0.09                                                                          | 0.75               | 0.75    | -0.17   | 0.50           | -0.08                 | 1.50                         | 1.50           | -0.11   | 1.50           | 1.50           | 1.50           |         |         |         |         |         |         |         |         |                       |                       |         |         |         |         |          |                         |      |      |      |      |       |      |      |      |      |      |      |      |      |      |      |      |      |      |      |      |      |      |      |      |      |                       |      |      |      |      |        |      |       |       |       |      |       |       |       |      |      |      |       |      |      |       |       |       |       |      |      |       |      |      |      |      |      |      |      |      |       |       |      |      |      |       |      |      |       |      |       |      |      |       |      |      |      |          |    |   |                  |    |                |   |                                 |                |  |  |       |    |                |  |     |     |  |                |  |                              |                |  |                |                |                |           |       |      |     |       |       |       |       |      |  |  |       |       |     |      |       |  |       |  |  |      |      |  |      |      |      |
| Ion-type                                                                                                                                                                                                                                                                                                                                                                                                                                                                                                                                                                                                                                                                                                                                                                                                                                                                                                                                                                                                                                                                                                                                                                                                                                                                                                                                                                                                                                                                                                                                                                                                                                                                                                                                                                                                                                                                                                                                                                                                                                                                                                                                                                                                                                                                                                                                                                                                                                                                                                                                                                                                                                                            | PR     | V       | Y <sup>++1</sup> | KQ               | a <sub>1</sub> | E                                             | Y <sub>1</sub> -NH <sub>3</sub> | Y <sub>1</sub>             |                             |                    | PE-28   | PE          | b <sub>2</sub>    |                                                                                | PEE                | kAL     |         | b <sub>4</sub> |                       | Y <sub>9</sub> <sup>+2</sup> | Y <sub>4</sub> |         | Y <sub>6</sub> | Y <sub>7</sub> | Y <sub>8</sub> |         |         |         |         |         |         |         |         |                       |                       |         |         |         |         |          |                         |      |      |      |      |       |      |      |      |      |      |      |      |      |      |      |      |      |      |      |      |      |      |      |      |      |                       |      |      |      |      |        |      |       |       |       |      |       |       |       |      |      |      |       |      |      |       |       |       |       |      |      |       |      |      |      |      |      |      |      |      |       |       |      |      |      |       |      |      |       |      |       |      |      |       |      |      |      |          |    |   |                  |    |                |   |                                 |                |  |  |       |    |                |  |     |     |  |                |  |                              |                |  |                |                |                |           |       |      |     |       |       |       |       |      |  |  |       |       |     |      |       |  |       |  |  |      |      |  |      |      |      |
| Delta ppm                                                                                                                                                                                                                                                                                                                                                                                                                                                                                                                                                                                                                                                                                                                                                                                                                                                                                                                                                                                                                                                                                                                                                                                                                                                                                                                                                                                                                                                                                                                                                                                                                                                                                                                                                                                                                                                                                                                                                                                                                                                                                                                                                                                                                                                                                                                                                                                                                                                                                                                                                                                                                                                           | -21.8  | 22.5    | 3.5              | -17.5            | -21.2          | -16.2                                         | -26.6                           | 11.5                       |                             |                    | -16.2   | -14.7       | 5.8               | 12.6                                                                           | -16.2              |         | -31.7   |                |                       | -5.5                         | 11.2           |         | -9.1           | 29.3           | 34.7           |         |         |         |         |         |         |         |         |                       |                       |         |         |         |         |          |                         |      |      |      |      |       |      |      |      |      |      |      |      |      |      |      |      |      |      |      |      |      |      |      |      |      |                       |      |      |      |      |        |      |       |       |       |      |       |       |       |      |      |      |       |      |      |       |       |       |       |      |      |       |      |      |      |      |      |      |      |      |       |       |      |      |      |       |      |      |       |      |       |      |      |       |      |      |      |          |    |   |                  |    |                |   |                                 |                |  |  |       |    |                |  |     |     |  |                |  |                              |                |  |                |                |                |           |       |      |     |       |       |       |       |      |  |  |       |       |     |      |       |  |       |  |  |      |      |  |      |      |      |

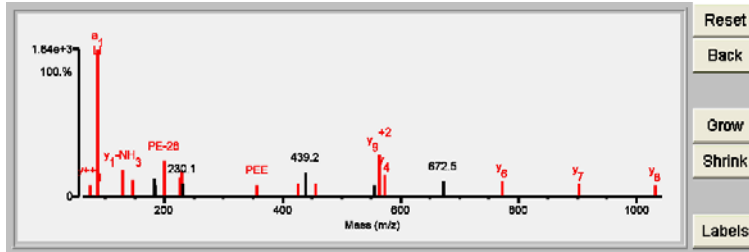

Reset

Back

Grow

Shrink

Labels

Result Summary

| Rank | Score | SPI (%) | BCS | # Unmatched Ions | Variable sites | Sequence              | MH <sup>+</sup> Calculated (Da) | MH <sup>+</sup> Error (Da) | MH <sup>+</sup> Error (ppm) | Protein MW/pl (Da) | Species | Accession # | Protein Name                                                                   |
|------|-------|---------|-----|------------------|----------------|-----------------------|---------------------------------|----------------------------|-----------------------------|--------------------|---------|-------------|--------------------------------------------------------------------------------|
| 1    | 25.30 | 94.4    | 13  | 3/25             | K51k           | (K)LIYAGKILNDDTALK(E) | 1647.9316                       | 114.0514                   | 4.8                         | 43171.414.79       | HUMAN   | P54727      | UV excision repair protein RAD23 homolog B OS=Homo sapiens GN=RAD23B PE=1 SV=1 |
| 2    | 11.10 | 68.1    | 6   | 14/25            | K60k           | (K)LIYAGKILNDDTALK(E) | 1647.9316                       | 114.0514                   | 4.8                         | 43171.414.79       | HUMAN   | P54727      | UV excision repair protein RAD23 homolog B OS=Homo sapiens GN=RAD23B PE=1 SV=1 |
| 3    | 8.82  | 68.8    | 4   | 14/25            | K136k          | (R)ILGKGSFGIMEATDK(E) | 1647.9316                       | 114.0514                   | 4.8                         | 57831.2/6.61       | HUMAN   | Q9BYT3      | Serine/threonine-protein kinase 33 OS=Homo sapiens GN=STK33 PE=1 SV=1          |
| 4    | 8.48  | 66.2    | 5   | 14/25            | K48k           | (K)ILVEFVDSQHKDK(L)   | 1647.9316                       | 114.0514                   | 4.8                         | 31293.6/5.10       | HUMAN   | Q95229      | ZW10 interactor OS=Homo sapiens GN=ZWINT PE=1 SV=2                             |
| 5    | 7.60  | 59.7    | 5   | 15/25            | K298k          | (R)ILNVDPHYSAIVEK(W)  | 1647.9064                       | 114.0766                   | 19.1                        | 104037.7/7.28      | HUMAN   | Q13003      | Glutamate receptor, ionotropic kainate 3 OS=Homo sapiens GN=GRIK3 PE=1 SV=3    |

Detailed Results

| Rank                                                                                                                                                                                                                                                                                                                                                                                                                                                                                                                                                                                                                                                                                                                                                                                                                                                                                                                                                                                                                                                                                                                                                                                                                                                                                                                                                                                                                                                                                                                                                                                                                                                                                                                                                                                                                                                                                                                                                                                                                                                                                                                                                                                                                                                                                                                                                                                                                                                                                                                                                                                                                    | Score  | SPI (%) | BCS    | # Unmatched Ions | Variable sites | Sequence                                                        | MH <sup>+</sup> Calculated (Da) | MH <sup>+</sup> Error (Da) | MH <sup>+</sup> Error (ppm) | Protein MW/pl (Da) | Species | Accession # | MS-Digest Index # | Protein Name                                                                   |                       |         |                       |                   |                       |                   |                       |                   |                       |         |          |         |         |         |         |                       |         |                       |         |                       |         |                       |         |                       |         |          |                        |      |       |      |      |      |       |      |      |      |      |      |      |      |      |      |      |      |      |      |      |      |      |      |      |      |                      |      |        |      |      |      |       |      |      |       |      |      |      |      |      |      |      |       |      |      |      |       |       |      |       |       |       |      |      |       |      |      |      |       |       |      |      |      |      |      |      |      |      |      |      |      |      |      |      |      |      |      |          |    |    |   |   |    |    |    |    |     |    |      |    |                   |       |                   |       |    |                   |    |                   |    |                   |    |    |           |      |       |      |      |      |      |      |      |     |      |      |      |     |      |      |      |      |      |      |     |      |      |      |     |
|-------------------------------------------------------------------------------------------------------------------------------------------------------------------------------------------------------------------------------------------------------------------------------------------------------------------------------------------------------------------------------------------------------------------------------------------------------------------------------------------------------------------------------------------------------------------------------------------------------------------------------------------------------------------------------------------------------------------------------------------------------------------------------------------------------------------------------------------------------------------------------------------------------------------------------------------------------------------------------------------------------------------------------------------------------------------------------------------------------------------------------------------------------------------------------------------------------------------------------------------------------------------------------------------------------------------------------------------------------------------------------------------------------------------------------------------------------------------------------------------------------------------------------------------------------------------------------------------------------------------------------------------------------------------------------------------------------------------------------------------------------------------------------------------------------------------------------------------------------------------------------------------------------------------------------------------------------------------------------------------------------------------------------------------------------------------------------------------------------------------------------------------------------------------------------------------------------------------------------------------------------------------------------------------------------------------------------------------------------------------------------------------------------------------------------------------------------------------------------------------------------------------------------------------------------------------------------------------------------------------------|--------|---------|--------|------------------|----------------|-----------------------------------------------------------------|---------------------------------|----------------------------|-----------------------------|--------------------|---------|-------------|-------------------|--------------------------------------------------------------------------------|-----------------------|---------|-----------------------|-------------------|-----------------------|-------------------|-----------------------|-------------------|-----------------------|---------|----------|---------|---------|---------|---------|-----------------------|---------|-----------------------|---------|-----------------------|---------|-----------------------|---------|-----------------------|---------|----------|------------------------|------|-------|------|------|------|-------|------|------|------|------|------|------|------|------|------|------|------|------|------|------|------|------|------|------|------|----------------------|------|--------|------|------|------|-------|------|------|-------|------|------|------|------|------|------|------|-------|------|------|------|-------|-------|------|-------|-------|-------|------|------|-------|------|------|------|-------|-------|------|------|------|------|------|------|------|------|------|------|------|------|------|------|------|------|------|----------|----|----|---|---|----|----|----|----|-----|----|------|----|-------------------|-------|-------------------|-------|----|-------------------|----|-------------------|----|-------------------|----|----|-----------|------|-------|------|------|------|------|------|------|-----|------|------|------|-----|------|------|------|------|------|------|-----|------|------|------|-----|
| 1                                                                                                                                                                                                                                                                                                                                                                                                                                                                                                                                                                                                                                                                                                                                                                                                                                                                                                                                                                                                                                                                                                                                                                                                                                                                                                                                                                                                                                                                                                                                                                                                                                                                                                                                                                                                                                                                                                                                                                                                                                                                                                                                                                                                                                                                                                                                                                                                                                                                                                                                                                                                                       | 25.30  | 94.4    | 13     | 3/25             | K51k           | (K) L I / T / Y / A / G / K I / L / N / D / D / T A / L / K (E) | 1647.9316                       | 114.0514                   | 4.8                         | 43171.414.79       | HUMAN   | P54727      | 562953            | UV excision repair protein RAD23 homolog B OS=Homo sapiens GN=RAD23B PE=1 SV=1 |                       |         |                       |                   |                       |                   |                       |                   |                       |         |          |         |         |         |         |                       |         |                       |         |                       |         |                       |         |                       |         |          |                        |      |       |      |      |      |       |      |      |      |      |      |      |      |      |      |      |      |      |      |      |      |      |      |      |      |                      |      |        |      |      |      |       |      |      |       |      |      |      |      |      |      |      |       |      |      |      |       |       |      |       |       |       |      |      |       |      |      |      |       |       |      |      |      |      |      |      |      |      |      |      |      |      |      |      |      |      |      |          |    |    |   |   |    |    |    |    |     |    |      |    |                   |       |                   |       |    |                   |    |                   |    |                   |    |    |           |      |       |      |      |      |      |      |      |     |      |      |      |     |      |      |      |      |      |      |     |      |      |      |     |
| <table border="1"> <thead> <tr> <th>Fragment-ion (m/z)</th> <th>84.081</th> <th>86.097</th> <th>87.100</th> <th>136.075</th> <th>147.113</th> <th>199.180</th> <th>200.182</th> <th>207.113</th> <th>227.176</th> <th>260.198</th> <th>371.203</th> <th>432.280</th> <th>534.266</th> <th>547.311</th> <th>622.842<sup>+2</sup></th> <th>647.349</th> <th>651.363<sup>+2</sup></th> <th>662.335</th> <th>686.874<sup>+2</sup></th> <th>760.430</th> <th>768.413<sup>+2</sup></th> <th>776.377</th> <th>824.962<sup>+2</sup></th> <th>889.461</th> <th>1002.548</th> </tr> </thead> <tbody> <tr> <td>Frac. Inten.(% of TIC)</td> <td>0.27</td> <td>27.69</td> <td>1.54</td> <td>0.14</td> <td>2.11</td> <td>15.45</td> <td>1.74</td> <td>2.29</td> <td>4.27</td> <td>1.29</td> <td>2.67</td> <td>1.92</td> <td>2.66</td> <td>1.93</td> <td>1.31</td> <td>1.27</td> <td>3.40</td> <td>1.57</td> <td>1.87</td> <td>1.33</td> <td>8.12</td> <td>4.35</td> <td>1.21</td> <td>5.40</td> <td>4.20</td> </tr> <tr> <td>Rel. Inten.(% of BP)</td> <td>0.99</td> <td>100.00</td> <td>5.54</td> <td>0.50</td> <td>7.60</td> <td>55.79</td> <td>6.30</td> <td>8.28</td> <td>15.42</td> <td>4.64</td> <td>9.66</td> <td>6.94</td> <td>9.61</td> <td>6.99</td> <td>4.73</td> <td>4.59</td> <td>12.26</td> <td>5.67</td> <td>6.74</td> <td>4.79</td> <td>29.34</td> <td>15.70</td> <td>4.39</td> <td>19.50</td> <td>15.15</td> </tr> <tr> <td>Score</td> <td>0.50</td> <td>0.50</td> <td>-0.06</td> <td>1.00</td> <td>1.50</td> <td>0.50</td> <td>-0.06</td> <td>-0.08</td> <td>0.75</td> <td>1.50</td> <td>0.75</td> <td>1.50</td> <td>0.75</td> <td>1.50</td> <td>1.50</td> <td>0.75</td> <td>1.50</td> <td>1.50</td> <td>1.50</td> <td>1.50</td> <td>1.50</td> <td>1.50</td> <td>1.50</td> <td>1.50</td> <td>1.50</td> </tr> <tr> <td>Ion-type</td> <td>KQ</td> <td>a1</td> <td>Y</td> <td>Y</td> <td>y1</td> <td>y2</td> <td>b2</td> <td>y2</td> <td>AGk</td> <td>y4</td> <td>YAGk</td> <td>y5</td> <td>y10<sup>+2</sup></td> <td>YAGki</td> <td>y11<sup>+2</sup></td> <td>YAGki</td> <td>y6</td> <td>y12<sup>+2</sup></td> <td>b6</td> <td>y13<sup>+2</sup></td> <td>y7</td> <td>y14<sup>+2</sup></td> <td>y6</td> <td>y9</td> </tr> <tr> <td>Delta ppm</td> <td>-2.1</td> <td>-11.9</td> <td>-5.8</td> <td>-2.1</td> <td>-8.5</td> <td>-8.5</td> <td>-4.0</td> <td>-4.0</td> <td>3.6</td> <td>-4.7</td> <td>-4.3</td> <td>-3.7</td> <td>5.1</td> <td>-5.4</td> <td>-5.0</td> <td>10.1</td> <td>-1.4</td> <td>-2.3</td> <td>-8.5</td> <td>7.5</td> <td>-1.8</td> <td>16.5</td> <td>-2.0</td> <td>1.0</td> </tr> </tbody> </table> |        |         |        |                  |                |                                                                 |                                 |                            |                             |                    |         |             |                   |                                                                                | Fragment-ion (m/z)    | 84.081  | 86.097                | 87.100            | 136.075               | 147.113           | 199.180               | 200.182           | 207.113               | 227.176 | 260.198  | 371.203 | 432.280 | 534.266 | 547.311 | 622.842 <sup>+2</sup> | 647.349 | 651.363 <sup>+2</sup> | 662.335 | 686.874 <sup>+2</sup> | 760.430 | 768.413 <sup>+2</sup> | 776.377 | 824.962 <sup>+2</sup> | 889.461 | 1002.548 | Frac. Inten.(% of TIC) | 0.27 | 27.69 | 1.54 | 0.14 | 2.11 | 15.45 | 1.74 | 2.29 | 4.27 | 1.29 | 2.67 | 1.92 | 2.66 | 1.93 | 1.31 | 1.27 | 3.40 | 1.57 | 1.87 | 1.33 | 8.12 | 4.35 | 1.21 | 5.40 | 4.20 | Rel. Inten.(% of BP) | 0.99 | 100.00 | 5.54 | 0.50 | 7.60 | 55.79 | 6.30 | 8.28 | 15.42 | 4.64 | 9.66 | 6.94 | 9.61 | 6.99 | 4.73 | 4.59 | 12.26 | 5.67 | 6.74 | 4.79 | 29.34 | 15.70 | 4.39 | 19.50 | 15.15 | Score | 0.50 | 0.50 | -0.06 | 1.00 | 1.50 | 0.50 | -0.06 | -0.08 | 0.75 | 1.50 | 0.75 | 1.50 | 0.75 | 1.50 | 1.50 | 0.75 | 1.50 | 1.50 | 1.50 | 1.50 | 1.50 | 1.50 | 1.50 | 1.50 | 1.50 | Ion-type | KQ | a1 | Y | Y | y1 | y2 | b2 | y2 | AGk | y4 | YAGk | y5 | y10 <sup>+2</sup> | YAGki | y11 <sup>+2</sup> | YAGki | y6 | y12 <sup>+2</sup> | b6 | y13 <sup>+2</sup> | y7 | y14 <sup>+2</sup> | y6 | y9 | Delta ppm | -2.1 | -11.9 | -5.8 | -2.1 | -8.5 | -8.5 | -4.0 | -4.0 | 3.6 | -4.7 | -4.3 | -3.7 | 5.1 | -5.4 | -5.0 | 10.1 | -1.4 | -2.3 | -8.5 | 7.5 | -1.8 | 16.5 | -2.0 | 1.0 |
| Fragment-ion (m/z)                                                                                                                                                                                                                                                                                                                                                                                                                                                                                                                                                                                                                                                                                                                                                                                                                                                                                                                                                                                                                                                                                                                                                                                                                                                                                                                                                                                                                                                                                                                                                                                                                                                                                                                                                                                                                                                                                                                                                                                                                                                                                                                                                                                                                                                                                                                                                                                                                                                                                                                                                                                                      | 84.081 | 86.097  | 87.100 | 136.075          | 147.113        | 199.180                                                         | 200.182                         | 207.113                    | 227.176                     | 260.198            | 371.203 | 432.280     | 534.266           | 547.311                                                                        | 622.842 <sup>+2</sup> | 647.349 | 651.363 <sup>+2</sup> | 662.335           | 686.874 <sup>+2</sup> | 760.430           | 768.413 <sup>+2</sup> | 776.377           | 824.962 <sup>+2</sup> | 889.461 | 1002.548 |         |         |         |         |                       |         |                       |         |                       |         |                       |         |                       |         |          |                        |      |       |      |      |      |       |      |      |      |      |      |      |      |      |      |      |      |      |      |      |      |      |      |      |      |                      |      |        |      |      |      |       |      |      |       |      |      |      |      |      |      |      |       |      |      |      |       |       |      |       |       |       |      |      |       |      |      |      |       |       |      |      |      |      |      |      |      |      |      |      |      |      |      |      |      |      |      |          |    |    |   |   |    |    |    |    |     |    |      |    |                   |       |                   |       |    |                   |    |                   |    |                   |    |    |           |      |       |      |      |      |      |      |      |     |      |      |      |     |      |      |      |      |      |      |     |      |      |      |     |
| Frac. Inten.(% of TIC)                                                                                                                                                                                                                                                                                                                                                                                                                                                                                                                                                                                                                                                                                                                                                                                                                                                                                                                                                                                                                                                                                                                                                                                                                                                                                                                                                                                                                                                                                                                                                                                                                                                                                                                                                                                                                                                                                                                                                                                                                                                                                                                                                                                                                                                                                                                                                                                                                                                                                                                                                                                                  | 0.27   | 27.69   | 1.54   | 0.14             | 2.11           | 15.45                                                           | 1.74                            | 2.29                       | 4.27                        | 1.29               | 2.67    | 1.92        | 2.66              | 1.93                                                                           | 1.31                  | 1.27    | 3.40                  | 1.57              | 1.87                  | 1.33              | 8.12                  | 4.35              | 1.21                  | 5.40    | 4.20     |         |         |         |         |                       |         |                       |         |                       |         |                       |         |                       |         |          |                        |      |       |      |      |      |       |      |      |      |      |      |      |      |      |      |      |      |      |      |      |      |      |      |      |      |                      |      |        |      |      |      |       |      |      |       |      |      |      |      |      |      |      |       |      |      |      |       |       |      |       |       |       |      |      |       |      |      |      |       |       |      |      |      |      |      |      |      |      |      |      |      |      |      |      |      |      |      |          |    |    |   |   |    |    |    |    |     |    |      |    |                   |       |                   |       |    |                   |    |                   |    |                   |    |    |           |      |       |      |      |      |      |      |      |     |      |      |      |     |      |      |      |      |      |      |     |      |      |      |     |
| Rel. Inten.(% of BP)                                                                                                                                                                                                                                                                                                                                                                                                                                                                                                                                                                                                                                                                                                                                                                                                                                                                                                                                                                                                                                                                                                                                                                                                                                                                                                                                                                                                                                                                                                                                                                                                                                                                                                                                                                                                                                                                                                                                                                                                                                                                                                                                                                                                                                                                                                                                                                                                                                                                                                                                                                                                    | 0.99   | 100.00  | 5.54   | 0.50             | 7.60           | 55.79                                                           | 6.30                            | 8.28                       | 15.42                       | 4.64               | 9.66    | 6.94        | 9.61              | 6.99                                                                           | 4.73                  | 4.59    | 12.26                 | 5.67              | 6.74                  | 4.79              | 29.34                 | 15.70             | 4.39                  | 19.50   | 15.15    |         |         |         |         |                       |         |                       |         |                       |         |                       |         |                       |         |          |                        |      |       |      |      |      |       |      |      |      |      |      |      |      |      |      |      |      |      |      |      |      |      |      |      |      |                      |      |        |      |      |      |       |      |      |       |      |      |      |      |      |      |      |       |      |      |      |       |       |      |       |       |       |      |      |       |      |      |      |       |       |      |      |      |      |      |      |      |      |      |      |      |      |      |      |      |      |      |          |    |    |   |   |    |    |    |    |     |    |      |    |                   |       |                   |       |    |                   |    |                   |    |                   |    |    |           |      |       |      |      |      |      |      |      |     |      |      |      |     |      |      |      |      |      |      |     |      |      |      |     |
| Score                                                                                                                                                                                                                                                                                                                                                                                                                                                                                                                                                                                                                                                                                                                                                                                                                                                                                                                                                                                                                                                                                                                                                                                                                                                                                                                                                                                                                                                                                                                                                                                                                                                                                                                                                                                                                                                                                                                                                                                                                                                                                                                                                                                                                                                                                                                                                                                                                                                                                                                                                                                                                   | 0.50   | 0.50    | -0.06  | 1.00             | 1.50           | 0.50                                                            | -0.06                           | -0.08                      | 0.75                        | 1.50               | 0.75    | 1.50        | 0.75              | 1.50                                                                           | 1.50                  | 0.75    | 1.50                  | 1.50              | 1.50                  | 1.50              | 1.50                  | 1.50              | 1.50                  | 1.50    | 1.50     |         |         |         |         |                       |         |                       |         |                       |         |                       |         |                       |         |          |                        |      |       |      |      |      |       |      |      |      |      |      |      |      |      |      |      |      |      |      |      |      |      |      |      |      |                      |      |        |      |      |      |       |      |      |       |      |      |      |      |      |      |      |       |      |      |      |       |       |      |       |       |       |      |      |       |      |      |      |       |       |      |      |      |      |      |      |      |      |      |      |      |      |      |      |      |      |      |          |    |    |   |   |    |    |    |    |     |    |      |    |                   |       |                   |       |    |                   |    |                   |    |                   |    |    |           |      |       |      |      |      |      |      |      |     |      |      |      |     |      |      |      |      |      |      |     |      |      |      |     |
| Ion-type                                                                                                                                                                                                                                                                                                                                                                                                                                                                                                                                                                                                                                                                                                                                                                                                                                                                                                                                                                                                                                                                                                                                                                                                                                                                                                                                                                                                                                                                                                                                                                                                                                                                                                                                                                                                                                                                                                                                                                                                                                                                                                                                                                                                                                                                                                                                                                                                                                                                                                                                                                                                                | KQ     | a1      | Y      | Y                | y1             | y2                                                              | b2                              | y2                         | AGk                         | y4                 | YAGk    | y5          | y10 <sup>+2</sup> | YAGki                                                                          | y11 <sup>+2</sup>     | YAGki   | y6                    | y12 <sup>+2</sup> | b6                    | y13 <sup>+2</sup> | y7                    | y14 <sup>+2</sup> | y6                    | y9      |          |         |         |         |         |                       |         |                       |         |                       |         |                       |         |                       |         |          |                        |      |       |      |      |      |       |      |      |      |      |      |      |      |      |      |      |      |      |      |      |      |      |      |      |      |                      |      |        |      |      |      |       |      |      |       |      |      |      |      |      |      |      |       |      |      |      |       |       |      |       |       |       |      |      |       |      |      |      |       |       |      |      |      |      |      |      |      |      |      |      |      |      |      |      |      |      |      |          |    |    |   |   |    |    |    |    |     |    |      |    |                   |       |                   |       |    |                   |    |                   |    |                   |    |    |           |      |       |      |      |      |      |      |      |     |      |      |      |     |      |      |      |      |      |      |     |      |      |      |     |
| Delta ppm                                                                                                                                                                                                                                                                                                                                                                                                                                                                                                                                                                                                                                                                                                                                                                                                                                                                                                                                                                                                                                                                                                                                                                                                                                                                                                                                                                                                                                                                                                                                                                                                                                                                                                                                                                                                                                                                                                                                                                                                                                                                                                                                                                                                                                                                                                                                                                                                                                                                                                                                                                                                               | -2.1   | -11.9   | -5.8   | -2.1             | -8.5           | -8.5                                                            | -4.0                            | -4.0                       | 3.6                         | -4.7               | -4.3    | -3.7        | 5.1               | -5.4                                                                           | -5.0                  | 10.1    | -1.4                  | -2.3              | -8.5                  | 7.5               | -1.8                  | 16.5              | -2.0                  | 1.0     |          |         |         |         |         |                       |         |                       |         |                       |         |                       |         |                       |         |          |                        |      |       |      |      |      |       |      |      |      |      |      |      |      |      |      |      |      |      |      |      |      |      |      |      |      |                      |      |        |      |      |      |       |      |      |       |      |      |      |      |      |      |      |       |      |      |      |       |       |      |       |       |       |      |      |       |      |      |      |       |       |      |      |      |      |      |      |      |      |      |      |      |      |      |      |      |      |      |          |    |    |   |   |    |    |    |    |     |    |      |    |                   |       |                   |       |    |                   |    |                   |    |                   |    |    |           |      |       |      |      |      |      |      |      |     |      |      |      |     |      |      |      |      |      |      |     |      |      |      |     |

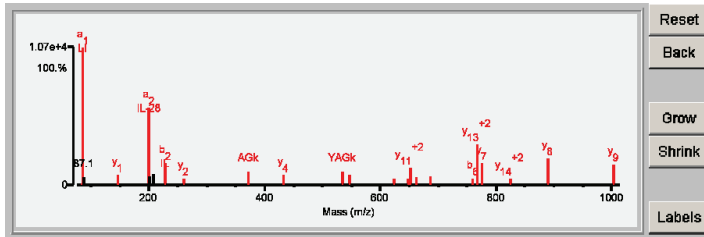

Result Summary

| Rank | Score | SPI (%) | BCS | # Unmatched Ions | Variable sites | Sequence         | MH <sup>+</sup> Calculated (Da) | MH <sup>+</sup> Error (Da) | MH <sup>+</sup> Error (ppm) | Protein MW/pI (Da) | Species | Accession # | Protein Name                                                                   |
|------|-------|---------|-----|------------------|----------------|------------------|---------------------------------|----------------------------|-----------------------------|--------------------|---------|-------------|--------------------------------------------------------------------------------|
| 1    | 10.04 | 71.3    | 6   | 8/23             | K76k           | (K)NFVVMVTkPK(A) | 1261.7337                       | 114.0453                   | 1.7                         | 43171.4/4.79       | HUMAN   | P54727      | UV excision repair protein RAD23 homolog B OS=Homo sapiens GN=RAD23B PE=1 SV=1 |

Detailed Results

| Rank | Score | SPI (%) | BCS | # Unmatched Ions | Variable sites | Sequence          | MH <sup>+</sup> Calculated (Da) | MH <sup>+</sup> Error (Da) | MH <sup>+</sup> Error (ppm) | Protein MW/pI (Da) | Species | Accession # | MS-Digest Index # | Protein Name                                                                   |
|------|-------|---------|-----|------------------|----------------|-------------------|---------------------------------|----------------------------|-----------------------------|--------------------|---------|-------------|-------------------|--------------------------------------------------------------------------------|
| 1    | 10.04 | 71.3    | 6   | 8/23             | K76k           | (K)N FVVMVTkPK(A) | 1261.7337                       | 114.0453                   | 1.7                         | 43171.4/4.79       | HUMAN   | P54727      | 562953            | UV excision repair protein RAD23 homolog B OS=Homo sapiens GN=RAD23B PE=1 SV=1 |

| Fragment-ion (m/z)      | 72.081 | 84.080 | 104.053 | 105.050 | 120.080 | 147.113 | 171.145 | 175.083 | 199.145 | 203.117 | 226.152 | 234.126 | 244.164 | 262.118 | 271.140 | 327.127 | 344.189 | 361.188 | 425.245              | 443.259 | 573.327 | 587.343 | 817.451 |
|-------------------------|--------|--------|---------|---------|---------|---------|---------|---------|---------|---------|---------|---------|---------|---------|---------|---------|---------|---------|----------------------|---------|---------|---------|---------|
| Frac. Inten. (% of TIC) | 0.66   | 0.41   | 4.04    | 2.98    | 0.22    | 4.18    | 6.09    | 2.97    | 3.64    | 4.06    | 2.97    | 4.52    | 9.87    | 4.68    | 3.46    | 5.52    | 9.80    | 10.57   | 3.90                 | 4.21    | 2.65    | 6.00    | 2.59    |
| Rel. Inten. (% of BP)   | 6.20   | 3.88   | 38.22   | 28.20   | 2.10    | 39.59   | 57.66   | 28.15   | 34.43   | 38.39   | 28.13   | 42.80   | 93.45   | 44.28   | 32.75   | 52.29   | 92.73   | 100.00  | 36.91                | 39.85   | 25.11   | 56.81   | 24.55   |
| Score                   | 0.50   | 0.50   | -0.38   | -0.28   | 1.00    | 1.50    | 0.50    | -0.28   | 0.75    | -0.38   | -0.28   | 0.50    | 1.50    | 0.50    | -0.33   | -0.52   | 0.75    | 0.50    | 0.50                 | 0.75    | -0.25   | 1.50    | 1.50    |
| Ion-type                | V      | KQ     |         |         | F       | y1      | VV-28   | VV      |         |         |         | a2      | y2      | b2      |         | Tk      | b3      |         | Vtk-H <sub>2</sub> O | Vtk     |         | y4      | y6      |
| Delta ppm               | 5.9    | -11.6  |         |         | -4.8    | 0.7     | -22.7   |         | 5.5     |         |         | 8.5     | -4.8    | -4.3    |         | -10.9   | 2.4     |         | -13.2                | -4.6    |         | -13.5   | -10.7   |

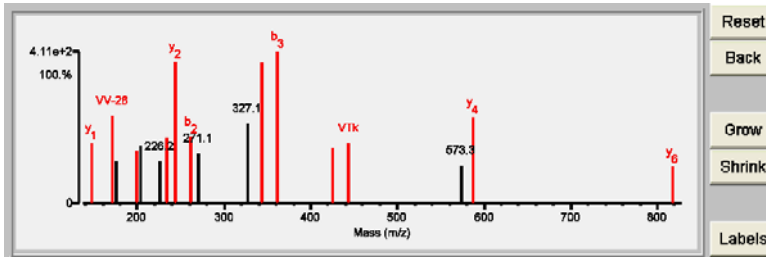

Result Summary

| Rank | Score | SPI (%) | BCS | # Unmatched Ions | Variable sites | Sequence                | MH <sup>+</sup> Calculated (Da) | MH <sup>+</sup> Error (Da) | MH <sup>+</sup> Error (ppm) | Protein MW/pI (Da) | Species | Accession # | Protein Name                              |
|------|-------|---------|-----|------------------|----------------|-------------------------|---------------------------------|----------------------------|-----------------------------|--------------------|---------|-------------|-------------------------------------------|
| 1    | 11.11 | 71.5    | 7   | 9/25             | K129k          | (R)FLEQQNKILLAELEQLK(G) | 2057.1641                       | 114.0615                   | 8.6                         | 53651.9/5.06       | HUMAN   | P08670      | Vimentin OS=Homo sapiens GN=VIM PE=1 SV=4 |

Detailed Results

| Rank                   | Score | SPI (%) | BCS    | # Unmatched Ions | Variable sites | Sequence                | MH <sup>+</sup> Calculated (Da) | MH <sup>+</sup> Error (Da) | MH <sup>+</sup> Error (ppm) | Protein MW/pI (Da) | Species | Accession #           | MS-Digest Index #     | Protein Name                              |                       |                       |                       |                       |         |         |         |         |         |          |          |          |
|------------------------|-------|---------|--------|------------------|----------------|-------------------------|---------------------------------|----------------------------|-----------------------------|--------------------|---------|-----------------------|-----------------------|-------------------------------------------|-----------------------|-----------------------|-----------------------|-----------------------|---------|---------|---------|---------|---------|----------|----------|----------|
| 1                      | 11.11 | 71.5    | 7      | 9/25             | K129k          | (R)FLEQQNKILLAELEQLK(G) | 2057.1641                       | 114.0615                   | 8.6                         | 53651.9/5.06       | HUMAN   | P08670                | 837031                | Vimentin OS=Homo sapiens GN=VIM PE=1 SV=4 |                       |                       |                       |                       |         |         |         |         |         |          |          |          |
| Fragment-ion (m/z)     |       | 84.080  | 96.096 | 101.072          | 120.076        | 157.134                 | 201.079                         | 215.135                    | 227.175                     | 233.162            | 261.159 | 371.225 <sup>+2</sup> | 453.214 <sup>+2</sup> | 486.303                                   | 493.219 <sup>+2</sup> | 535.759 <sup>+2</sup> | 549.786 <sup>+2</sup> | 692.323 <sup>+2</sup> | 630.375 | 691.349 | 759.430 | 830.472 | 943.522 | 1056.621 | 1115.569 | 1169.702 |
| Frac. Inten.(% of TIC) |       | 0.25    | 0.53   | 0.10             | 0.14           | 2.83                    | 2.80                            | 2.77                       | 3.63                        | 9.04               | 7.21    | 5.85                  | 3.20                  | 3.60                                      | 3.48                  | 4.02                  | 2.98                  | 3.08                  | 4.31    | 2.76    | 6.63    | 10.92   | 9.12    | 4.95     | 2.89     | 2.91     |
| Rel. Inten.(% of BP)   |       | 2.32    | 4.84   | 0.90             | 1.28           | 25.95                   | 25.62                           | 25.40                      | 33.20                       | 82.75              | 66.04   | 53.53                 | 29.29                 | 33.01                                     | 31.85                 | 36.80                 | 27.32                 | 28.25                 | 39.45   | 25.26   | 60.71   | 100.00  | 83.53   | 45.36    | 26.42    | 26.64    |
| Score                  |       | 0.50    | 0.22   |                  | 1.00           | -0.26                   | -0.26                           | -0.25                      | 0.75                        | 0.50               | 0.50    | 0.50                  | -0.29                 | -0.33                                     | 31.85                 | -0.37                 | 0.25                  | -0.28                 | 1.50    | -0.25   | 1.50    | 1.50    | 1.50    | 1.50     | 0.50     | 1.50     |
| Ion-type               |       | KQ      | LI     | KQ               | F              |                         |                                 | LL                         | a2                          | b2                 | b2      | y6+H2O <sup>+2</sup>  |                       |                                           |                       | bs-NH3 <sup>+2</sup>  |                       | y5                    |         | y6      | y7      | y8      | y9      | bs       | y10      |          |
| Delta ppm              |       | -5.7    | -9.6   |                  | -36.4          |                         |                                 | -8.4                       | -8.4                        | -18.6              | -5.6    | 37.5                  |                       |                                           |                       |                       | 6.0                   |                       | -10.5   |         | 6.6     | 12.6    | -25.1   | -8.9     | -14.4    | -10.2    |

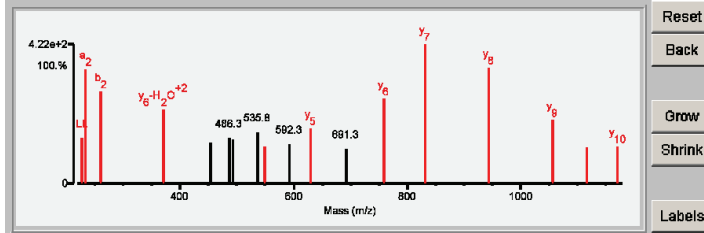

Reset

Back

Grow

Shrink

Labels



Result Summary

| Rank | Score | SPI (%) | BCS | # Unmatched ions | Variable sites | Sequence             | MH <sup>+</sup> Calculated (Da) | MH <sup>+</sup> Error (Da) | MH <sup>+</sup> Error (ppm) | Protein MW/pl (Da) | Species | Accession # | Protein Name                                                                                                          |
|------|-------|---------|-----|------------------|----------------|----------------------|---------------------------------|----------------------------|-----------------------------|--------------------|---------|-------------|-----------------------------------------------------------------------------------------------------------------------|
| 1    | 21.82 | 94.0    | 9   | 3/25             | K139k          | (K)LLAELEQLKGGQK(S)  | 1539.9105                       | 114.0585                   | 9.4                         | 53651.9/5.06       | HUMAN   | P08670      | Vimentin OS=Homo sapiens GN=VIM PE=1 SV=4                                                                             |
| 2    | 18.58 | 85.8    | 7   | 5/25             | K143k          | (K)LLAELEQLKGGQK(S)  | 1539.9105                       | 114.0585                   | 9.4                         | 53651.9/5.06       | HUMAN   | P08670      | Vimentin OS=Homo sapiens GN=VIM PE=1 SV=4                                                                             |
| 3    | 7.39  | 54.3    | 3   | 13/25            | K795k          | (K)KELLKALLNEIAGK(Q) | 1539.9469                       | 114.0221                   | -12.6                       | 122521.8/6.23      | HUMAN   | RQ9UPN9     | REVERSE E3 ubiquitin-protein ligase TRIM3 OS=Homo sapiens GN=TRIM3 PE=1 SV=2                                          |
| 3    | 7.39  | 54.3    | 3   | 13/25            | K799k          | (K)KELLKALLNEIAGK(Q) | 1539.9469                       | 114.0221                   | -12.6                       | 122521.8/6.23      | HUMAN   | RQ9UPN9     | REVERSE E3 ubiquitin-protein ligase TRIM3 OS=Homo sapiens GN=TRIM3 PE=1 SV=2                                          |
| 4    | 6.61  | 63.7    | 2   | 16/25            | K1015k K1023k  | (K)LLSKAVNEVVK(L)    | 1425.9039                       | 228.0650                   | -12.6                       | 182623.1/7.30      | HUMAN   | RQ70235     | REVERSE Phosphatidylinositol 3,4,5-trisphosphate-dependent Rac exchanger 2 protein OS=Homo sapiens GN=PREX2 PE=1 SV=1 |

Detailed Results

| Rank | Score | SPI (%) | BCS | # Unmatched ions | Variable sites | Sequence                       | MH <sup>+</sup> Calculated (Da) | MH <sup>+</sup> Error (Da) | MH <sup>+</sup> Error (ppm) | Protein MW/pl (Da) | Species | Accession # | MS-Digest Index # | Protein Name                              |
|------|-------|---------|-----|------------------|----------------|--------------------------------|---------------------------------|----------------------------|-----------------------------|--------------------|---------|-------------|-------------------|-------------------------------------------|
| 1    | 21.82 | 94.0    | 9   | 3/25             | K139k          | (K)ILLVAE/L/E/Q/L/K/G Q/G K(S) | 1539.9105                       | 114.0585                   | 9.4                         | 53651.9/5.06       | HUMAN   | P08670      | 837031            | Vimentin OS=Homo sapiens GN=VIM PE=1 SV=4 |

| Fragment-ion (m/z)     | 84.079 | 86.096 | 87.098 | 102.053 | 143.117 | 157.132 | 185.128 | 199.180 | 200.181 | 201.087 | 204.135 | 227.174 | 314.173 | 371.188 | 389.215 | 556.306 | 613.344 <sup>+2</sup> | 631.348 | 657.870 <sup>+2</sup> | 714.399 <sup>+2</sup> | 744.444 | 855.475 | 872.495 | 1001.534 | 1114.621 |
|------------------------|--------|--------|--------|---------|---------|---------|---------|---------|---------|---------|---------|---------|---------|---------|---------|---------|-----------------------|---------|-----------------------|-----------------------|---------|---------|---------|----------|----------|
| Frac. Inten.(% of TIC) | 0.18   | 33.71  | 1.73   | 0.04    | 2.80    | 1.93    | 3.34    | 10.88   | 1.43    | 1.54    | 3.45    | 4.47    | 4.33    | 1.79    | 4.80    | 1.41    | 1.38                  | 2.94    | 3.71                  | 5.00                  | 2.15    | 1.45    | 1.78    | 2.15     | 1.60     |
| Rel. Inten.(% of BP)   | 0.53   | 100.00 | 5.13   | 0.13    | 8.30    | 5.74    | 9.91    | 32.29   | 4.24    | 4.58    | 10.25   | 13.26   | 12.83   | 5.31    | 14.24   | 4.19    | 4.11                  | 8.71    | 10.99                 | 14.85                 | 6.38    | 4.30    | 5.28    | 6.37     | 4.75     |
| Score                  | 0.50   | 0.50   | -0.05  | 1.00    | -0.08   | 0.50    | 0.75    | 0.50    | -0.04   | 0.75    | 1.50    | 0.75    | 0.75    | 0.75    | 1.50    | 0.75    | 0.50                  | 1.50    | 1.50                  | 1.50                  | 1.50    | 0.50    | 1.50    | 1.50     | 1.50     |
| Ion-type               | KQ     | a1     |        | E       | LA-28   | LA      | a2      | AE      |         | AE      | y2      | b2      | AEL     | EQL     | y4      | LAELE   | y10-H2O <sup>+2</sup> | y5      | y11 <sup>+2</sup>     | y12 <sup>+2</sup>     | y6      | y7-NH3  | y7      | y8       | y9       |
| Delta ppm              | -22.3  | -7.3   |        | -19.2   |         | -8.5    | -0.3    |         |         | 0.6     | 1.6     |         | 7.8     | -11.3   | 2.0     | 15.1    | 22.8                  | -6.3    | 23.4                  | 3.1                   | 10.9    | 8.3     | 0.2     | -3.6     | -0.4     |
|                        |        |        |        |         | LI      |         | LL-28   |         |         |         |         |         |         |         |         |         |                       |         |                       |                       |         |         |         |          |          |

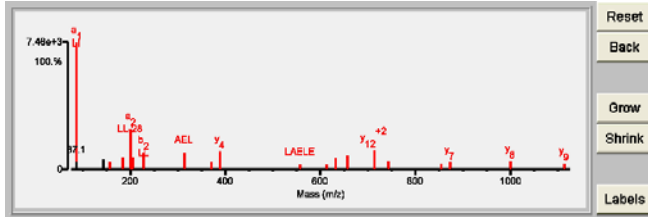

Result Summary

| Rank | Score | SPI (%) | BCS | Unmatched Ions | # Variable sites | Sequence                                       | MH <sup>+</sup> Calculated (Da) | MH <sup>+</sup> Error (Da) | MH <sup>+</sup> Error (ppm) | Protein MW/pI (Da) | Species | Accession # | Protein Name                                                        |
|------|-------|---------|-----|----------------|------------------|------------------------------------------------|---------------------------------|----------------------------|-----------------------------|--------------------|---------|-------------|---------------------------------------------------------------------|
| 1    | 24.97 | 94.9    | 15  | 2/25           | K396k            | (K)ILTKLLEVSDDPQVLVA <sup>AA</sup> HDVGEYVR(H) | 2950.5884                       | 114.0746                   | 10.3                        | 55883.4/6.07       | HUMAN   | Q9UI12      | V-type proton ATPase subunit H OS=Homo sapiens GN=ATP6V1H PE=1 SV=1 |

Detailed Results

| Rank                    | Score  | SPI (%) | BCS    | Unmatched Ions | # Variable sites | Sequence                                                        | MH <sup>+</sup> Calculated (Da) | MH <sup>+</sup> Error (Da) | MH <sup>+</sup> Error (ppm) | Protein MW/pI (Da) | Species               | Accession # | MS-Digest Index #     | Protein Name                                                        |         |                       |                       |         |         |                   |                       |                        |                        |          |          |
|-------------------------|--------|---------|--------|----------------|------------------|-----------------------------------------------------------------|---------------------------------|----------------------------|-----------------------------|--------------------|-----------------------|-------------|-----------------------|---------------------------------------------------------------------|---------|-----------------------|-----------------------|---------|---------|-------------------|-----------------------|------------------------|------------------------|----------|----------|
| 1                       | 24.97  | 94.9    | 15     | 2/25           | K396k            | (K) I L V T K L L E V S D D P Q V L V A A A H D V G E Y V R (H) | 2950.5884                       | 114.0746                   | 10.3                        | 55883.4/6.07       | HUMAN                 | Q9UI12      | 832021                | V-type proton ATPase subunit H OS=Homo sapiens GN=ATP6V1H PE=1 SV=1 |         |                       |                       |         |         |                   |                       |                        |                        |          |          |
| Fragment-ion (m/z)      | 72.081 | 84.080  | 86.095 | 199.179        | 226.113          | 227.177                                                         | 325.187                         | 570.365                    | 676.301 <sup>+3</sup>       | 670.320            | 700.378 <sup>+2</sup> | 722.369     | 749.904 <sup>+2</sup> | 796.533                                                             | 837.441 | 862.467 <sup>+2</sup> | 919.982 <sup>+2</sup> | 925.565 | 947.172 | 974.479           | 977.479 <sup>+2</sup> | 1021.015 <sup>+2</sup> | 1070.522 <sup>+2</sup> | 1116.553 | 1286.669 |
| Frac. Inten. (% of TIC) | 0.13   | 0.06    | 9.75   | 5.61           | 3.37             | 2.35                                                            | 2.66                            | 2.28                       | 9.66                        | 2.03               | 6.34                  | 3.03        | 3.88                  | 3.97                                                                | 3.42    | 8.73                  | 4.25                  | 3.15    | 3.12    | 2.19              | 4.14                  | 6.80                   | 4.53                   | 2.40     | 2.13     |
| Rel. Inten. (% of BP)   | 1.37   | 0.65    | 100.00 | 57.58          | 34.61            | 24.15                                                           | 27.28                           | 23.40                      | 99.06                       | 20.78              | 65.07                 | 31.04       | 39.83                 | 40.75                                                               | 35.07   | 89.59                 | 43.57                 | 32.32   | 31.96   | 22.45             | 42.42                 | 69.77                  | 46.49                  | 24.59    | 21.89    |
| Score                   | 0.50   | 0.50    | 0.50   | 0.50           | 0.75             | 0.75                                                            | 0.75                            | 0.75                       | 1.50                        | -0.21              | 1.50                  | 1.50        | 1.50                  | 1.50                                                                | 1.50    | 1.50                  | 1.50                  | 0.50    | -0.32   | 1.50              | 1.50                  | 1.50                   | 1.50                   | 1.50     | 1.50     |
| Ion-type                | V      | KQ      | a1     | a2             | PQ               | b2                                                              | PQV                             | b4                         | y16 <sup>+3</sup>           |                    | y13 <sup>+2</sup>     | y5          | y14 <sup>+2</sup>     | b6                                                                  | y7      | y16 <sup>+2</sup>     | y17 <sup>+2</sup>     | b7      | y8      | y18 <sup>+2</sup> | y19 <sup>+2</sup>     | y20 <sup>+2</sup>      | y10 <sup>+2</sup>      | y12      |          |
| Delta ppm               | 1.7    | -14.0   | -30.5  | -12.5          | -27.5            | -0.0                                                            | -5.0                            | 5.7                        | -13.3                       |                    | 10.8                  | -19.7       | -0.6                  | 3.6                                                                 | 36.4    | 8.8                   | 9.9                   | -8.5    |         | 10.2              | -8.3                  | 11.6                   | -14.4                  | 9.0      | 16.0     |

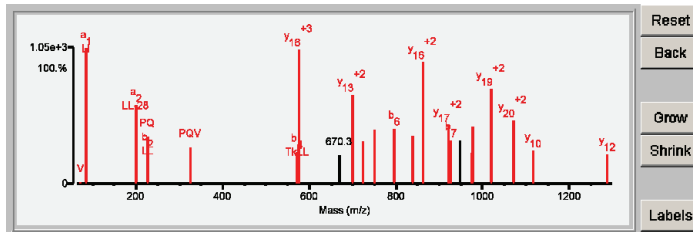

Result Summary

| Rank | Score | SPI (%) | BCS | # Unmatched Ions | Variable sites | Sequence              | MH <sup>+</sup> Calculated (Da) | MH <sup>+</sup> Error (Da) | MH <sup>+</sup> Error (ppm) | Protein MW/pl (Da) | Species | Accession # | Protein Name                                       |
|------|-------|---------|-----|------------------|----------------|-----------------------|---------------------------------|----------------------------|-----------------------------|--------------------|---------|-------------|----------------------------------------------------|
| 1    | 12.31 | 63.9    | 8   | 12/25            | K116k          | (K)IGLTkALTQMEEAQR(K) | 1688.9000                       | 114.0445                   | 0.9                         | 31293.6/5.10       | HUMAN   | O95229      | ZW10 interactor OS=Homo sapiens GN=ZWINT PE=1 SV=2 |

Detailed Results

| Rank | Score | SPI (%) | BCS | # Unmatched Ions | Variable sites | Sequence                                          | MH <sup>+</sup> Calculated (Da) | MH <sup>+</sup> Error (Da) | MH <sup>+</sup> Error (ppm) | Protein MW/pl (Da) | Species | Accession # | MS-Digest Index # | Protein Name                                       |
|------|-------|---------|-----|------------------|----------------|---------------------------------------------------|---------------------------------|----------------------------|-----------------------------|--------------------|---------|-------------|-------------------|----------------------------------------------------|
| 1    | 12.31 | 63.9    | 8   | 12/25            | K116k          | (K) I G L T k A L T / Q / M / E / E / A Q / R (K) | 1688.9000                       | 114.0445                   | 0.9                         | 31293.6/5.10       | HUMAN   | O95229      | 933375            | ZW10 interactor OS=Homo sapiens GN=ZWINT PE=1 SV=2 |

  

| Fragment-ion (m/z)      | 70.066 | 72.080 | 84.044 | 84.082 | 86.097 | 87.100 | 101.072 | 110.072 | 120.080 | 136.076 | 171.108 | 175.119 | 325.201 | 374.215 | 452.926 <sup>+3</sup> | 503.274 | 632.299 | 633.297 <sup>+2</sup> | 670.303 | 670.644 | 670.985 <sup>+2</sup> | 750.838 | 763.348 | 891.396 | 992.461 |
|-------------------------|--------|--------|--------|--------|--------|--------|---------|---------|---------|---------|---------|---------|---------|---------|-----------------------|---------|---------|-----------------------|---------|---------|-----------------------|---------|---------|---------|---------|
| Frac. Inten. (% of TIC) | 0.01   | 3.69   | 0.12   | 0.13   | 31.72  | 2.59   | 0.15    | 4.99    | 4.14    | 3.24    | 2.46    | 5.21    | 2.09    | 3.04    | 2.12                  | 4.63    | 5.25    | 2.38                  | 2.73    | 3.46    | 2.53                  | 2.09    | 5.74    | 2.63    | 2.85    |
| Rel. Inten. (% of BP)   | 0.04   | 11.64  | 0.39   | 0.42   | 100.00 | 8.18   | 0.47    | 15.73   | 13.07   | 10.21   | 7.75    | 16.41   | 6.59    | 9.59    | 6.67                  | 14.60   | 16.56   | 7.51                  | 8.59    | 10.91   | 7.97                  | 6.58    | 18.10   | 8.28    | 9.00    |
| Score                   | 0.20   | -0.12  | 1.00   |        | 0.50   | -0.08  | 0.50    | -0.16   | -0.13   | -0.10   | 0.75    | 1.50    | -0.07   | 1.50    | -0.07                 | 1.50    | 1.50    | -0.08                 | -0.09   | -0.11   | -0.08                 | -0.07   | 1.50    | 1.50    | 1.50    |
| Ion-type                | PR     |        | E      | QK     | a1     |        | QK      |         |         |         | b2      | y1      |         | y3      |                       | y4      | y5      |                       |         |         |                       |         | y6      | y7      | y8      |
| Delta ppm               | 5.3    |        | -1.1   |        | -10.7  |        | 5.5     |         |         |         | -31.6   | -2.0    |         | 1.0     |                       | 33.9    | -0.7    |                       |         |         |                       |         | 9.8     | -3.6    | 14.2    |

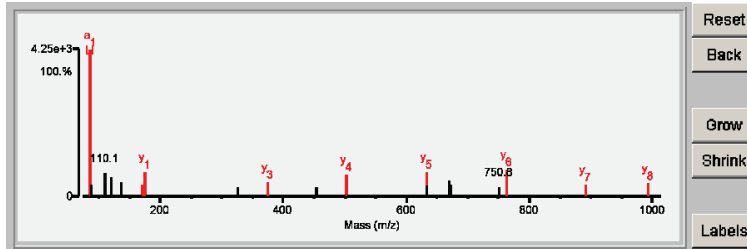

Reset  
Back  
Grow  
Shrink  
Labels

Supplementary Fig. 7

**a**

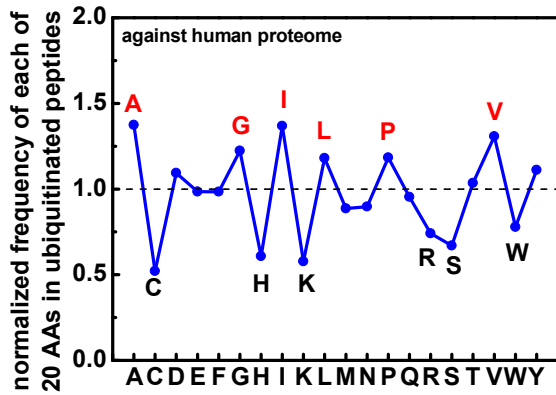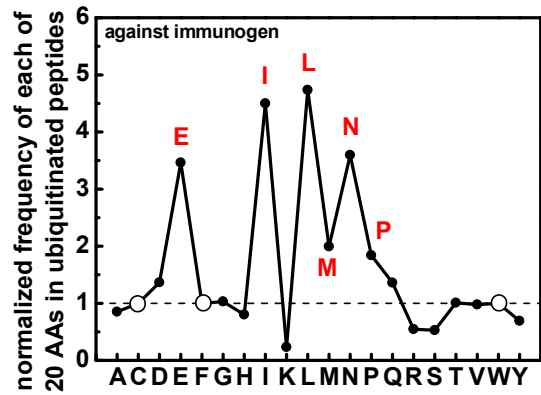

**b**

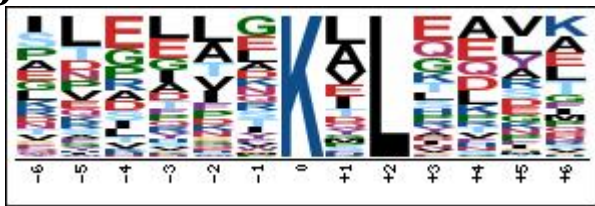

$p < 10^{-5}$  (68 matches, 1.8 fold increase)

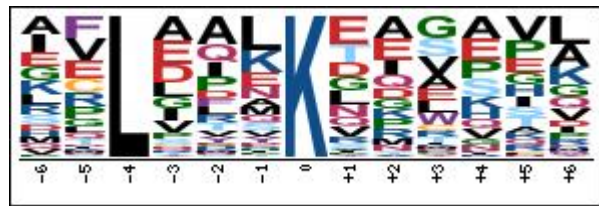

$p < 10^{-3}$  (42 matches, 1.8 fold increase)

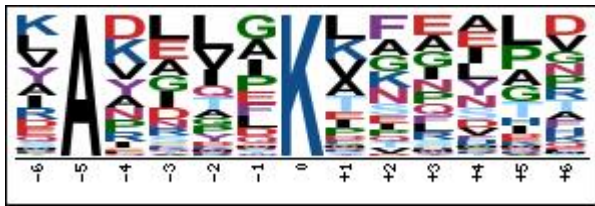

$p < 10^{-4}$  (38 matches, 2.1 fold increase)

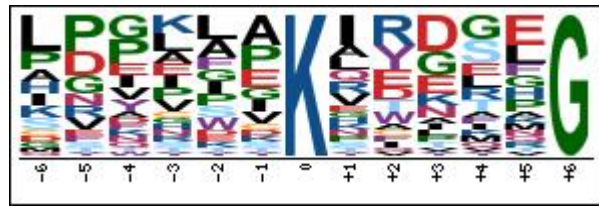

$p < 10^{-3}$  (24 matches, 2.1 fold increase)

**c**

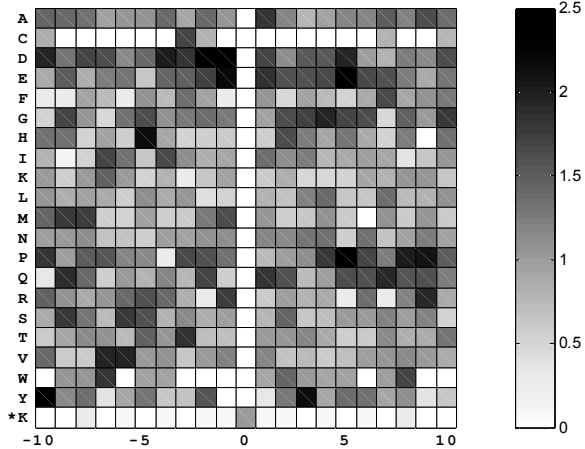

**d**

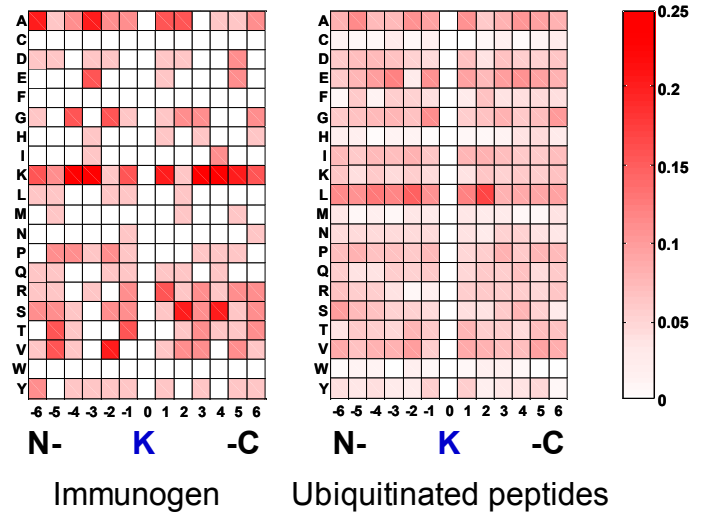

## Supplementary Fig. 7 Ubiquitinated peptides have little preference for backbone amino acid sequences.

(a) Normalized frequency of each of the 20 amino acids within a six amino acid span on either side of the ubiquitinated lysines. Normalization was carried out against the frequency calculated for each amino acid using all lysines in all human proteins in the Swiss-Prot database (v57.2, May 5, 2009) (left panel) or against the immunogen (bovine histone III-S) used for the antibody production (right panel). Note that (1) there are no Cys (C), Phe (F), and Trp (W) in the immunogen so that the normalized frequency for these amino acids is artificially set to 1.0 and plotted with open circles; and (2) the ubiquitinated lysines were not counted in this analysis. In the left panel showing residues adjacent to the modified lysine in ubiquitin remnant peptides, Ala, Gly, Ile, Leu, Pro, and Val, are slightly enriched (student's *t* test,  $p < 0.0001$ ) and Cys, His, Lys, Arg, Ser, and Trp are slightly depleted (student's *t* test,  $p < 0.0001$ ).

(b) Sequence logo representations of extracted motifs for the ubiquitinated peptides obtained using the Motif-x<sup>4</sup> search algorithm. The significance, number of matches, and the fold increase of the motif were shown below each logo. Sequence logos were automatically generated by Motif-x using Weblogo<sup>5,6</sup>. In sequence logos, the height of each residue is proportional to the frequency in the subset of peptides<sup>4</sup>.

(c) Backbone amino acid sequence analysis of ubiquitinated peptides detected in yeast. A density map was prepared as described in Fig. 3b except we used the proteins found to be ubiquitinated in yeast described in a previous proteomic study<sup>7</sup>. Unlike in mammalian proteins, Asp, Glu, His, and Pro are highly enriched (>2.3 times of the expected value in the yeast proteome) at some positions.

(d) The frequency of each of the 20 amino acids at the indicated positions of the N- or C-termini of the lysines in the immunogen or in the ubiquitinated peptides. The difference between these density maps from the one in Fig. 3b is that here the data are not normalized to the frequency of each of 20 amino acids at the same position using all lysines in the human Swiss-Prot database. As can be seen, the two density maps clearly show that amino acids that surround the modified lysines in the immunogen are not similar to the amino acids that surround the modified lysines in the ubiquitin remnant peptides. This confirms that there is no major bias or preference for amino acid context surrounding the diglycine-modified lysine in the peptides that are immunoprecipitated by the GX41 antibody.

Supplementary Fig. 8

**a**

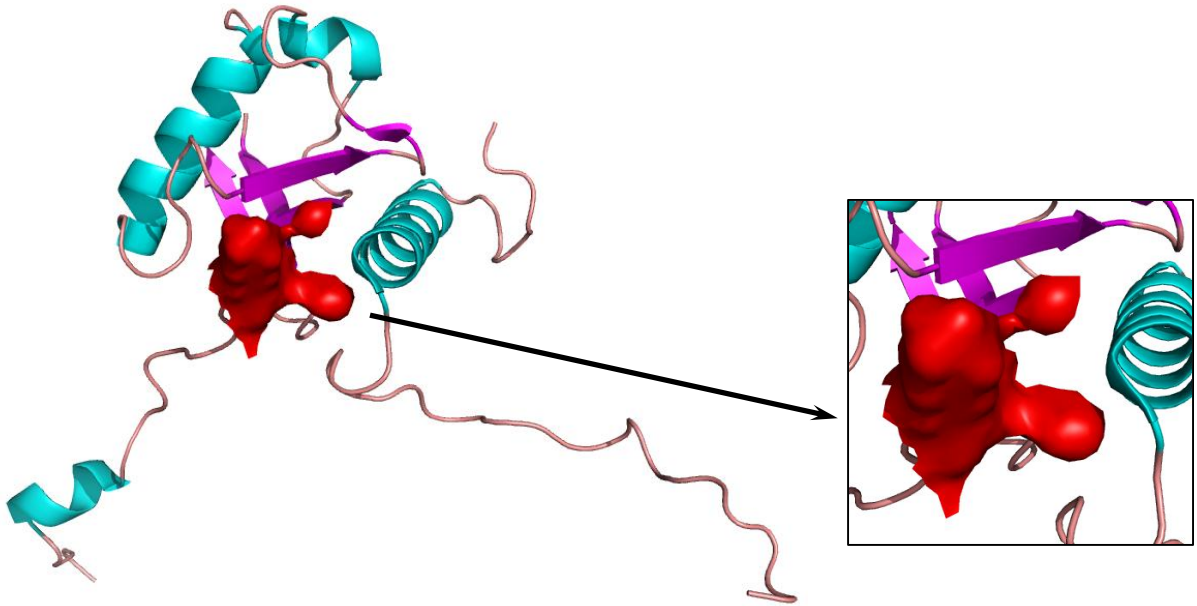

**b**

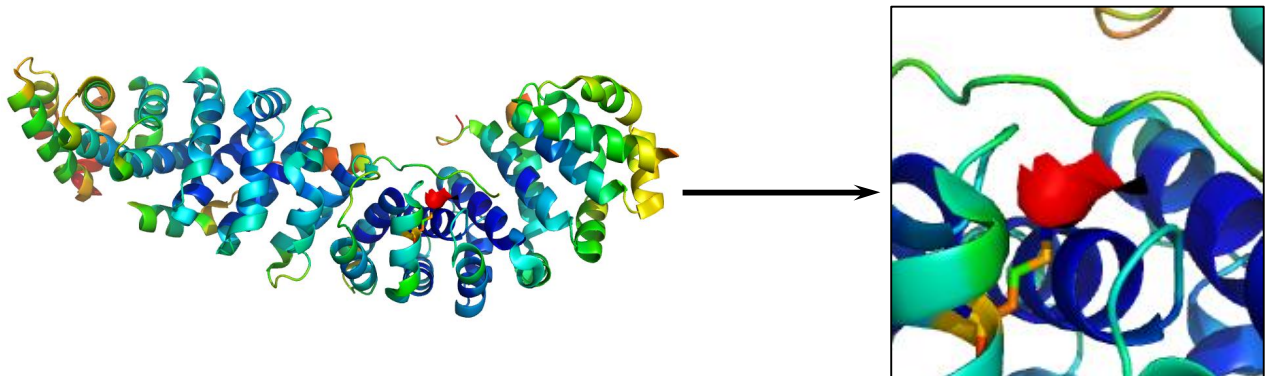

**Supplementary Fig. 8 Both solvent exposed and buried lysines can be ubiquitinated.**

**(a)** A solvent exposed ubiquitination site, lysine 76, from UV excision repair protein RAD23 homolog B (PDB:1UEL). The solvent-accessible area of lysines is shown in red.

**(b)** A solvent buried ubiquitination site, lysine 435, from  $\beta$ -catenin (PDB:1JDH). The snapshots were prepared using PyMOL<sup>8</sup>. Buried lysines are interesting since some mechanism must exist to increase their solvent exposure in order for them to be ubiquitinated.

Supplementary Fig. 9

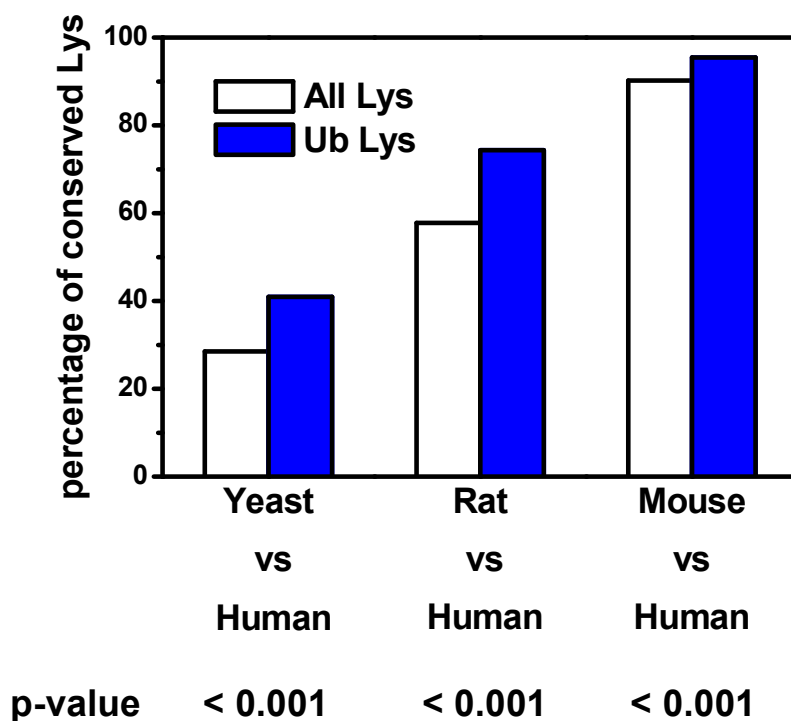

**Supplementary Fig. 9 Ubiquitinated lysines are highly conserved in different organisms.**

Lysine conservation in human, mouse, rat and yeast for all lysine residues (All Lys) and ubiquitinated lysine residues (Ub Lys) for the ubiquitinated proteins identified in our experiments. The sequence alignment of human proteins is performed by Basic Local Alignment Search Tool (BLAST) and the best hit for each human ubiquitinated protein in three organisms, mouse, rat and yeast, is used for the analysis of lysine conservation. Matches are found for all the ubiquitinated proteins in the mouse and the rat proteome, while matches were found for all but four proteins in the yeast proteome. This analysis showed that the ubiquitinated lysines are more conserved than lysines in general in three organisms.

Supplementary Fig. 10

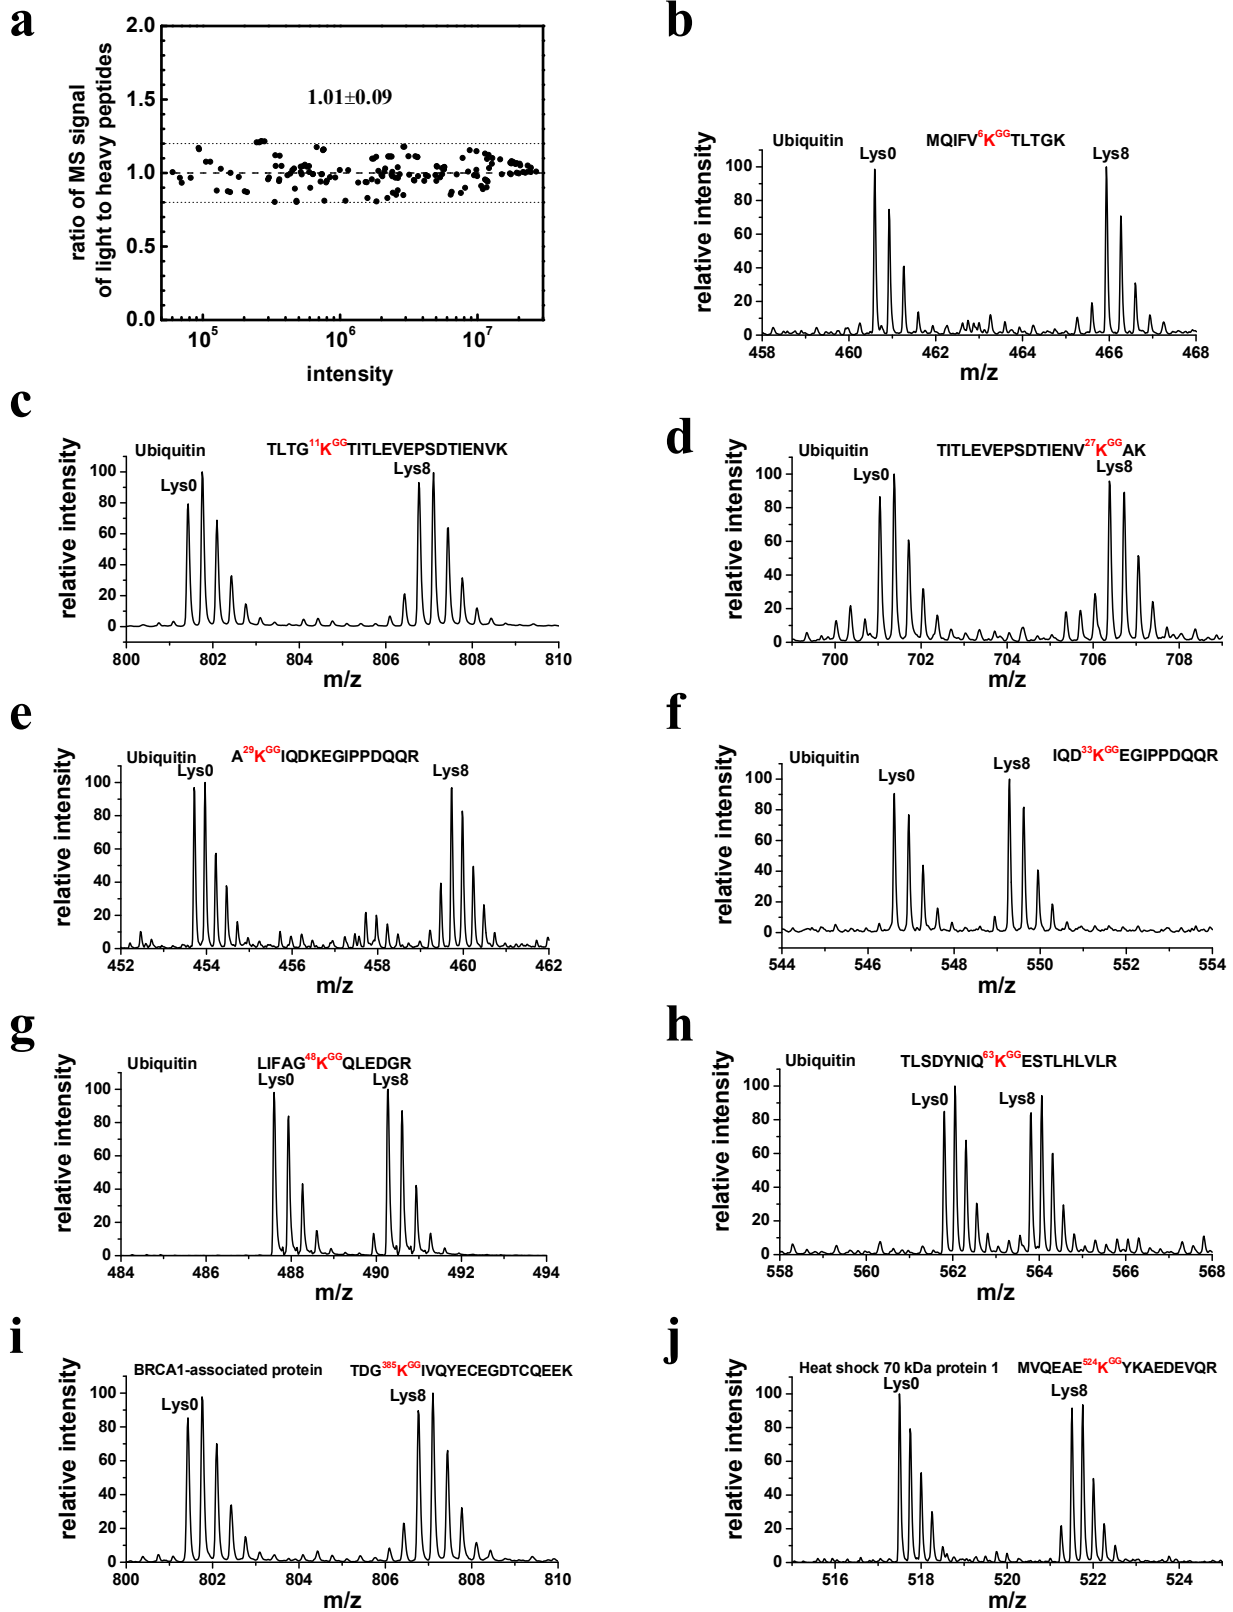



**Supplementary Fig. 10 The anti-diglycyl-lysine monoclonal antibody can quantitatively enrich for and quantitate ubiquitinated peptides in SILAC experiment.**

(a) The anti-diglycyl-lysine antibody immunoprecipitation can be used for the quantification of ubiquitinated peptides in connection with SILAC approach. Cells were metabolically labeled with light or heavy lysine and cells were mixed prior to Ni-NTA affinity purification, trypsin digestion and immunoaffinity purification. We selected peptides at a range of MS intensity to determine the ratio of light to heavy. An approximate 1:1 ratio was seen over the entire range of selected ion intensities. The average ratio (1.01) and 2X of its standard deviation (2X 0.09) are indicated with dotted lines in the figure.

HEK293 cells were labeled with either light or heavy lysines in SILAC medium and transfected with a plasmid expressing His<sub>6</sub>-tagged ubiquitin. An equal amount of cells from each of the labeled condition both treated with 25 μM LLnL for 16 hours, are mixed, lysed, and purified using Ni-NTA resin followed by trypsin digestion, anti-diglycyl-lysine antibody immunoprecipitation, and LC-MS/MS analysis.

(b-j) Examples of MS spectra of nine ubiquitinated peptides from ubiquitin, BRCA1 associated protein, and heat shock 70kD protein 1 obtained from the sample described above.

Almost all the ubiquitinated peptides have a ratio within 20% of the expected value, 1.0. The ratios of the representative ubiquitinated peptides in light and heavy forms are very close to 1.0. These results demonstrated that the monoclonal antibody can be used for peptide quantification in SILAC approach and also confirmed the labeled cells are equally mixed prior to affinity purification.

## Supplementary Fig. 11

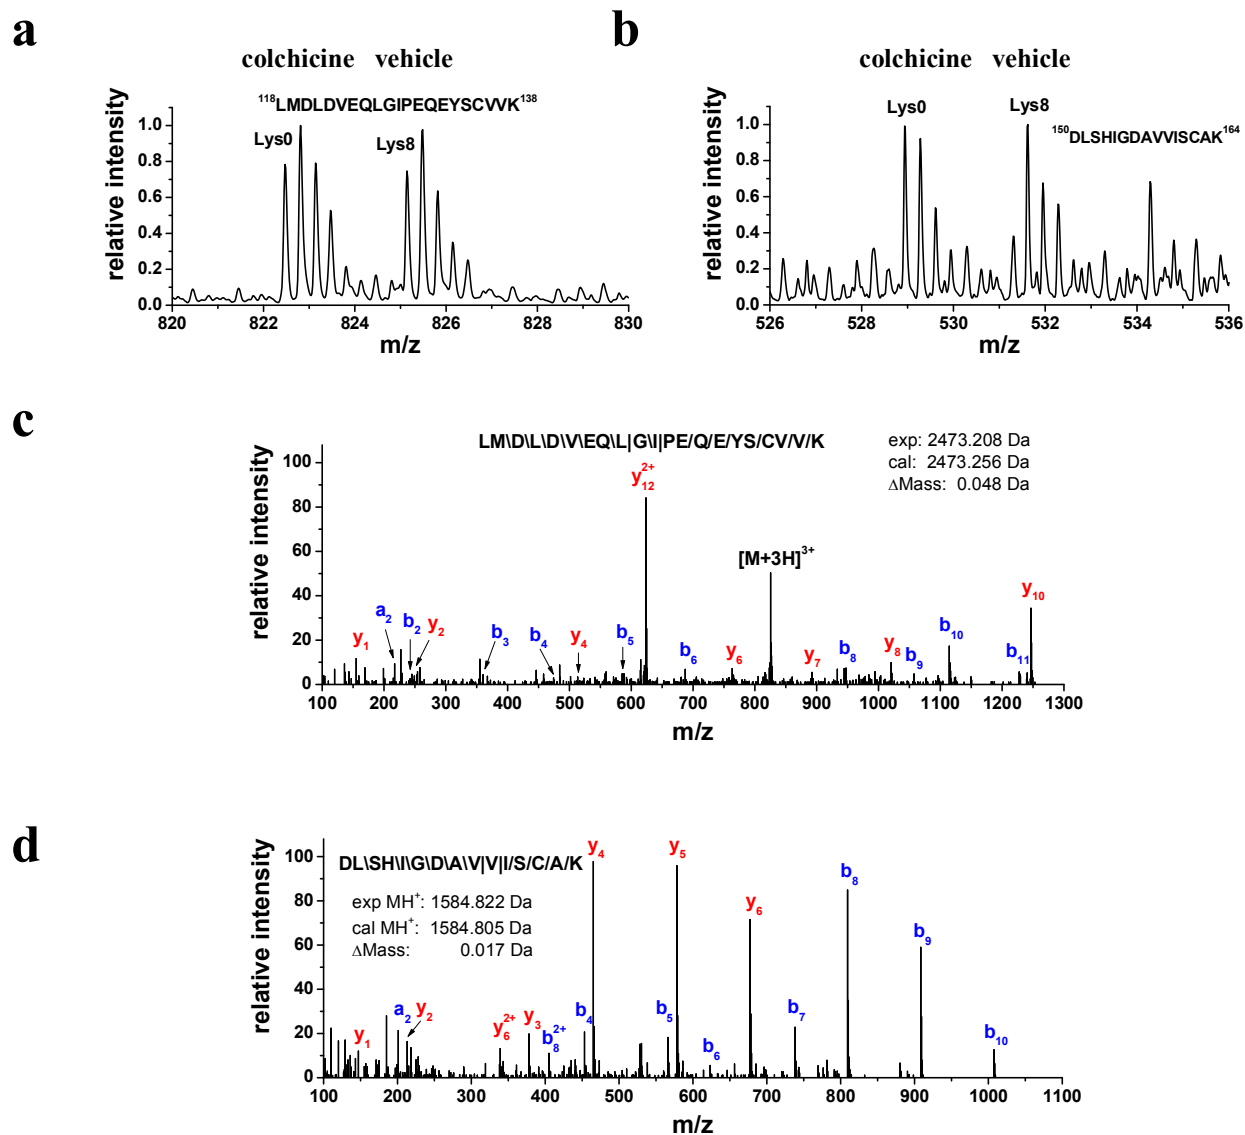

### Supplementary Fig. 11 MS and MS/MS of peptides from non-ubiquitinated PCNA used to normalize ubiquitinated PCNA peptides in SILAC quantification.

(a) and (b) The cell lysate from the mixture of light and heavy lysine-labeled cells, treated with colchicine and vehicle, respectively, contains an approximately equal amount of light and heavy lysine-labeled non-ubiquitinated PCNA peptides. Typical MS spectra of two non-ubiquitinated PCNA peptides from the initial cell lysate mixed with same amount of light and heavy lysine-labeled cells prior to the affinity purification by Ni-NTA resin. These data suggest that total PCNA levels do not change substantially as a result of colchicine treatment. The average ratio of these light and heavy lysine-labeled peptides was used for the normalization of ubiquitinated PCNA peptides from colchicine- and vehicle-treated samples.

(c) and (d) MS/MS spectra of non-ubiquitinated PCNA peptides used for normalization to confirm their identity in (a) and (b), respectively. Note that the peptide in (c) contains a heavy lysine (Lys8) at the C-termini.

HEK293 cells were grown in SILAC medium with either light (Lys0) or heavy lysines and transfected with His<sub>6</sub>-tagged ubiquitin. Light and heavy lysine-labeled HEK293 cells were treated with colchicine (10  $\mu\text{M}$ ) and vehicle, respectively, in the presence of proteasome inhibitor (LLnL, 25  $\mu\text{M}$ ), for 16 hours. An equal amount of differently labeled cells were mixed, lysed, digested by trypsin, and analyzed by LC-MS/MS.

Supplementary Fig. 12

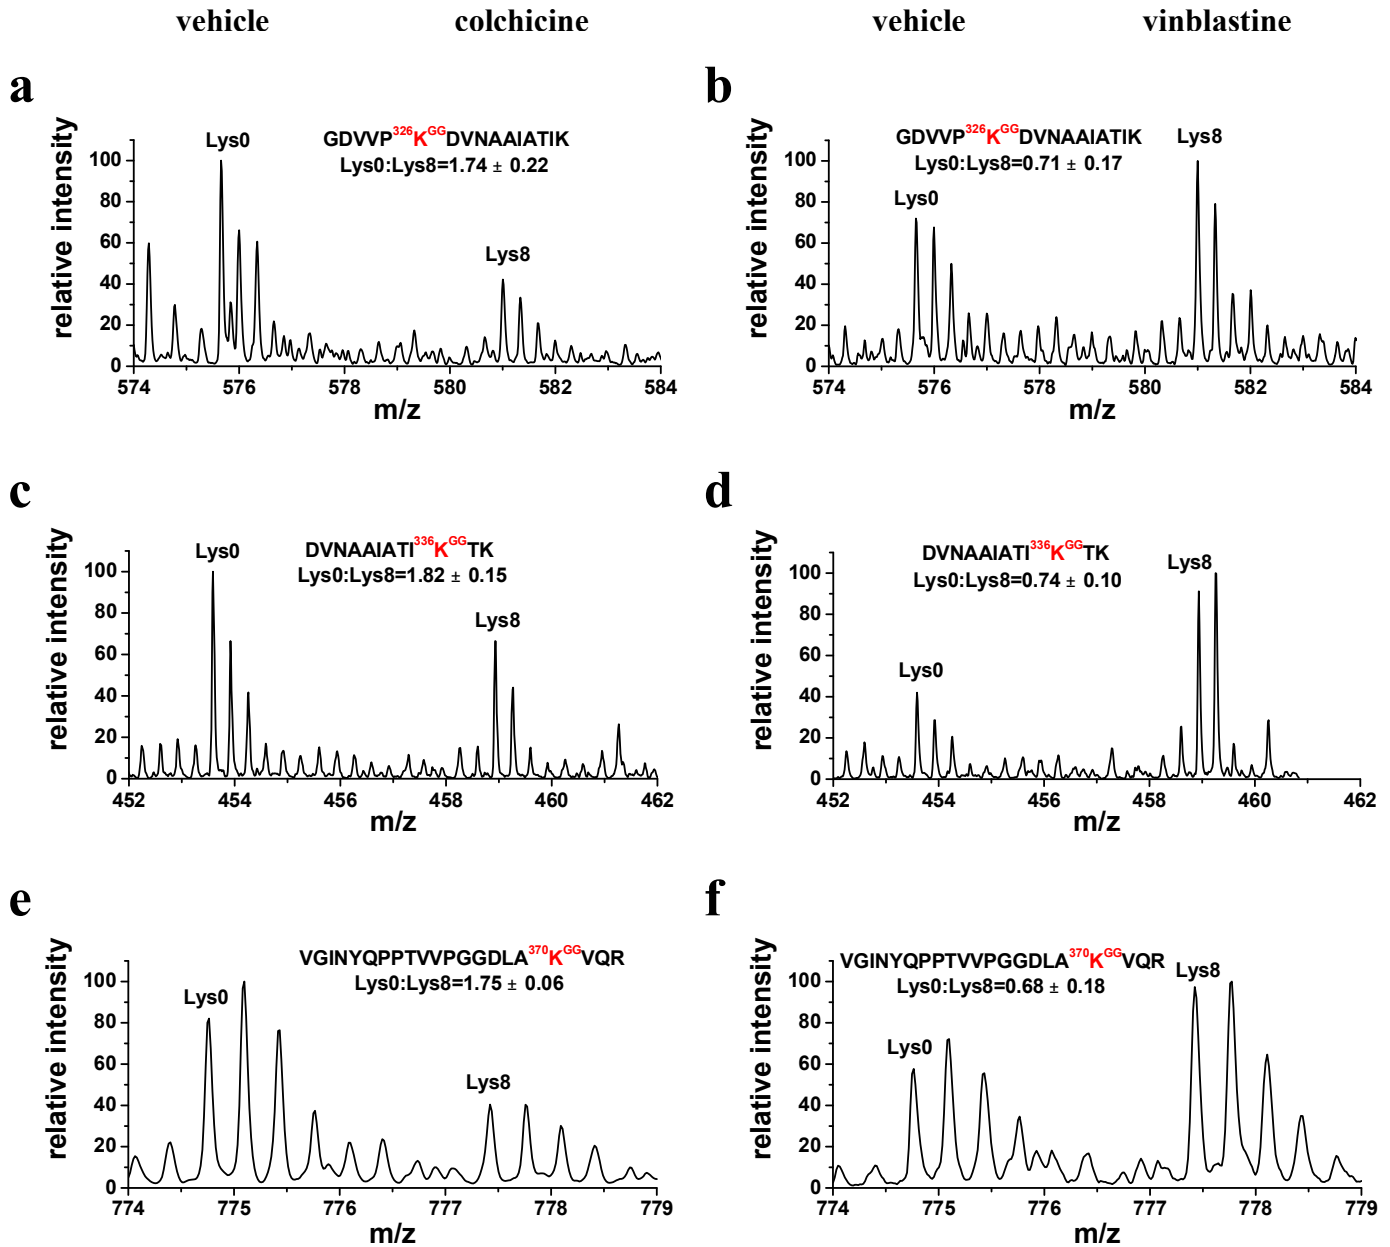

**Supplementary Fig. 12 Analysis of the change in tubulin  $\alpha$ -1A ubiquitination at three different lysines upon drug treatment.**

HEK293 cells were grown in SILAC media containing either light (Lys0) or heavy (Lys8) lysine, and transfected with His<sub>6</sub>-ubiquitin plasmid. Lys0-labeled cells were treated with 50  $\mu$ M LLnL (vehicle) while Lys8-labeled cells were treated with 50  $\mu$ M LLnL and 10  $\mu$ M colchicine (a, c, e) or 1  $\mu$ M vinblastine (b, d, f) for 30 min. The same amount of cells from vehicle and drug (colchicine or vinblastine) treated samples were mixed and ubiquitinated peptides were obtained as described in the text. The relative MS ratio between Lys0- and Lys8-labeled ubiquitinated peptides was used for the quantification of ubiquitination level in vehicle or drug treated sample. This ratio is normalized by the average ratio of two unmodified tubulin peptides (Supplementary Fig. 13) detected in the initial cell lysate. All the experiments were repeated three times.

Supplementary Fig. 13

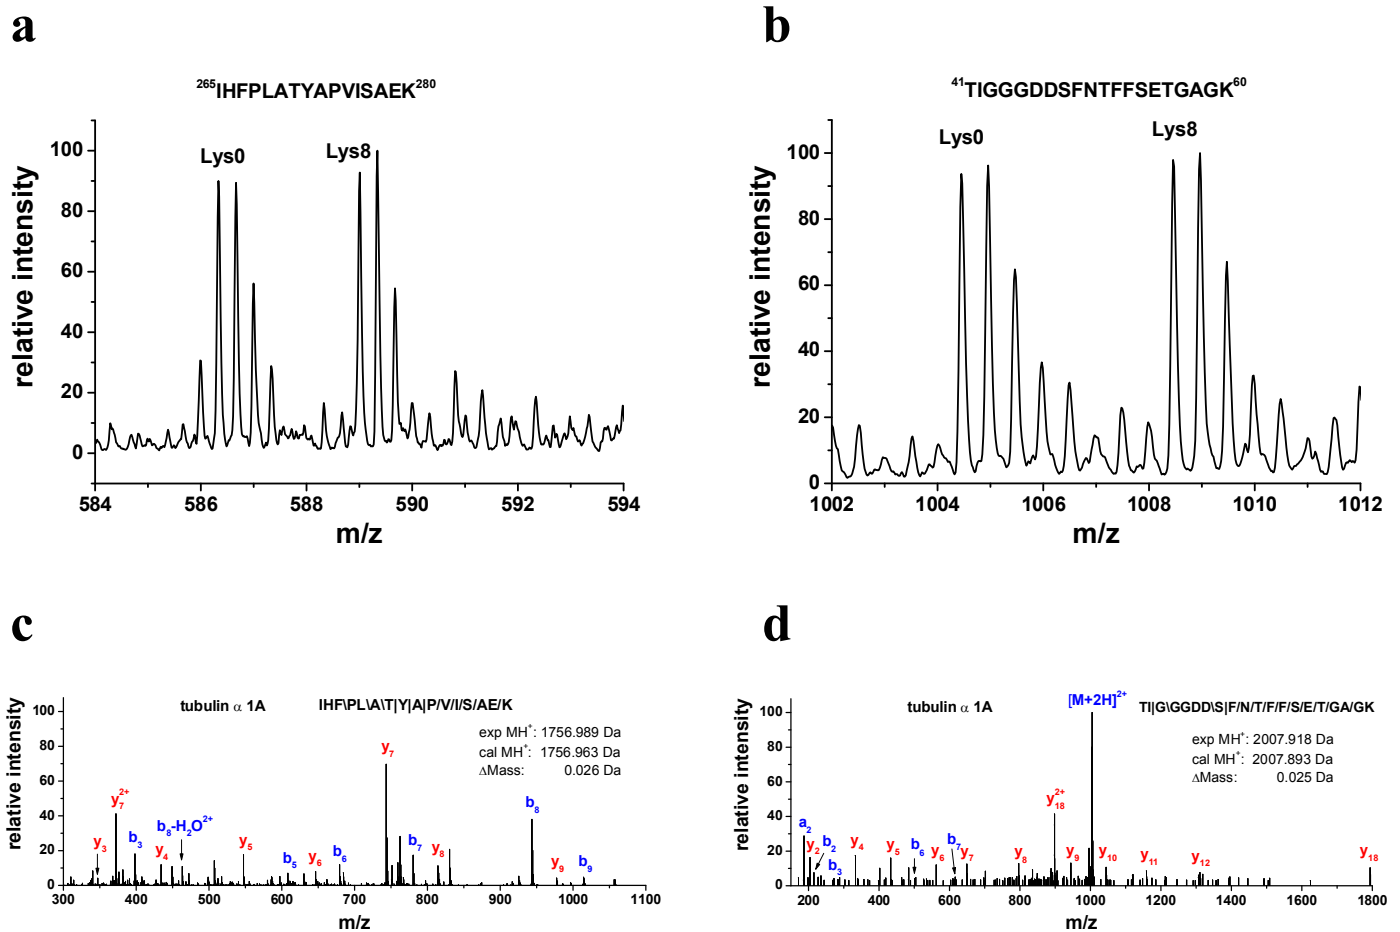

**Supplementary Fig. 13 MS and MS/MS of peptides from non-ubiquitinated tubulin  $\alpha$ -1A used for SILAC normalization of ubiquitinated tubulin peptides quantified in Supplementary Fig. 12.**

(a) and (b) Typical MS spectra of non-ubiquitinated tubulin peptides obtained from the initial cell lysate mixed with same amount of light and heavy lysine-labeled cells prior to affinity purification by Ni-NTA resin. These peptides were used for the normalization of the ratio of ubiquitinated tubulin peptides from vehicle or drug treated samples.

(c) and (d) MS/MS spectra, corresponding to the non-ubiquitinated peptides in (a) and (b) respectively, used to confirm their identity.

HEK293 cells were grown in SILAC medium with either light lysine (Lys0) or heavy lysine (Lys8) and transfected with His<sub>6</sub>-tagged ubiquitin. Light and heavy HEK293 cells were treated with vehicle and drugs (10  $\mu$ M colchicine or 1  $\mu$ M vinblastine), respectively, in the presence of the proteasome inhibitor (LLnL, 50  $\mu$ M) for 30 min. An equal amount of differently labeled cells were mixed, lysed, digested by trypsin, and analyzed by LC-MS/MS.

### Supplementary Fig. 14

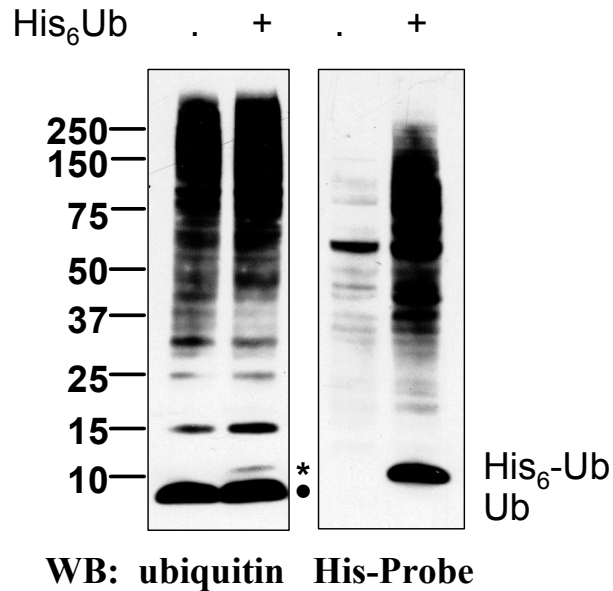

#### Supplementary Fig. 14 Features of His<sub>6</sub>-Ub expression in HEK293 cells.

In this experiment we assessed the degree of His<sub>6</sub>-Ub expression relative to endogenous ubiquitin. Non-transfected and His<sub>6</sub>-Ub-transfected HEK293 cells treated with LLnL were lysed and the lysates were separated by SDS-PAGE and blotted with anti-ubiquitin antibody (left panel). As can be seen, ubiquitin is readily apparent (solid circle), as well as higher molecular weight ubiquitin-conjugated proteins. Lysates from cells expressing His<sub>6</sub>-Ub show the heterologously expressed protein (indicated with an asterisk). Only a small amount of this protein is expressed relative to the endogenous amount of ubiquitin, reducing the likelihood that this protein might perturb endogenous ubiquitin pathways. In the right panel, cell lysates are blotted with His-Probe HRP (right panel) to detect His<sub>6</sub>-Ub and His<sub>6</sub>-Ub-conjugated proteins. Note that the His-Probe HRP can also detect endogenous histidine rich proteins.

Supplementary Fig. 15

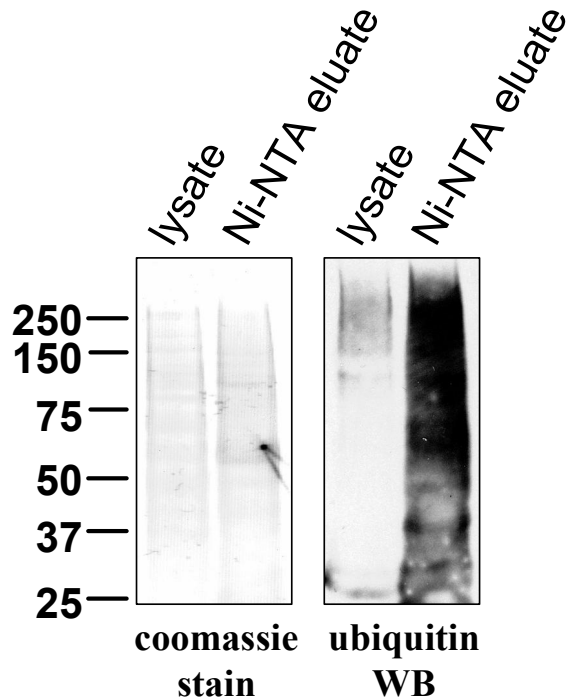

**Supplementary Fig. 15 Ubiquitinated proteins are significantly enriched after Ni-NTA resin purification.**

The use of His<sub>6</sub>-Ub expression allows for the enrichment of ubiquitinated proteins prior to trypsin digestion and ubiquitin remnant peptide immunopurification. In addition to reducing the likelihood that diglycine-modified peptides might derive from modifications other than ubiquitin, this approach can also enrich for otherwise low abundance proteins, thereby facilitating their detection. In the experiment above, the same amount of proteins from cell lysate and Ni-NTA eluate from His<sub>6</sub>-Ub expressing HEK293 cells were separated by SDS-PAGE and stained with Coomassie blue (left panel) or blotted with anti-ubiquitin antibody (right panel). Ubiquitinated proteins were significantly enriched in the sample after Ni-NTA resin purification.

Supplementary Figure 16

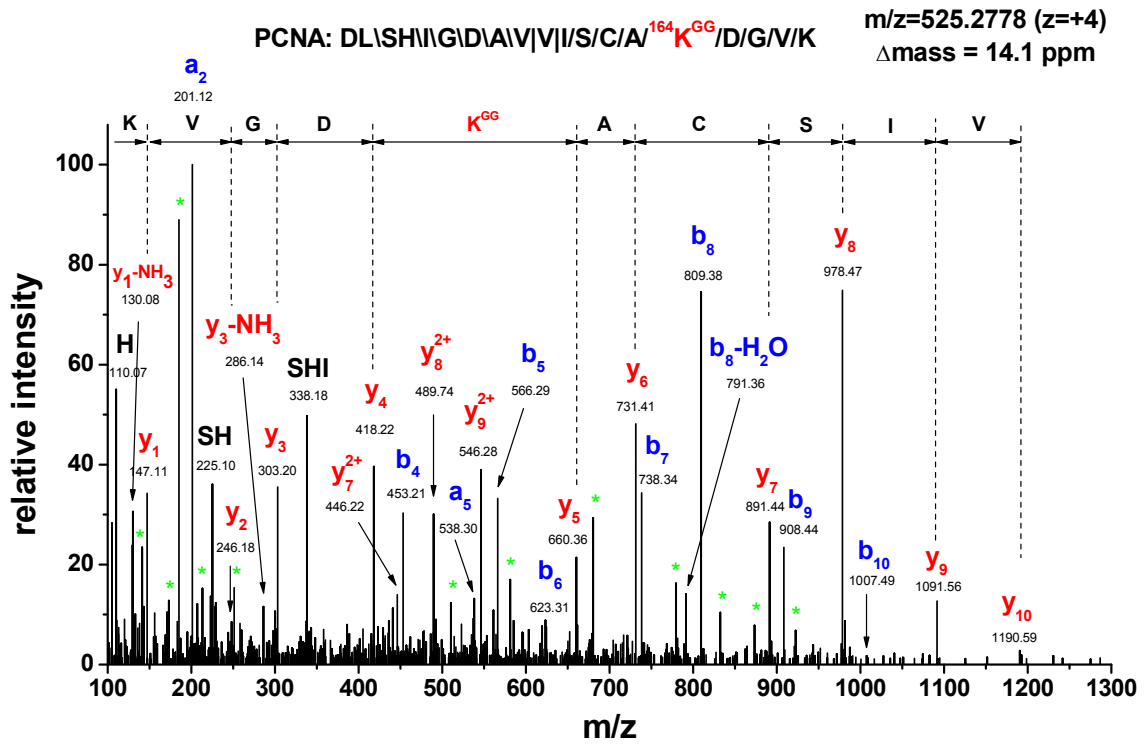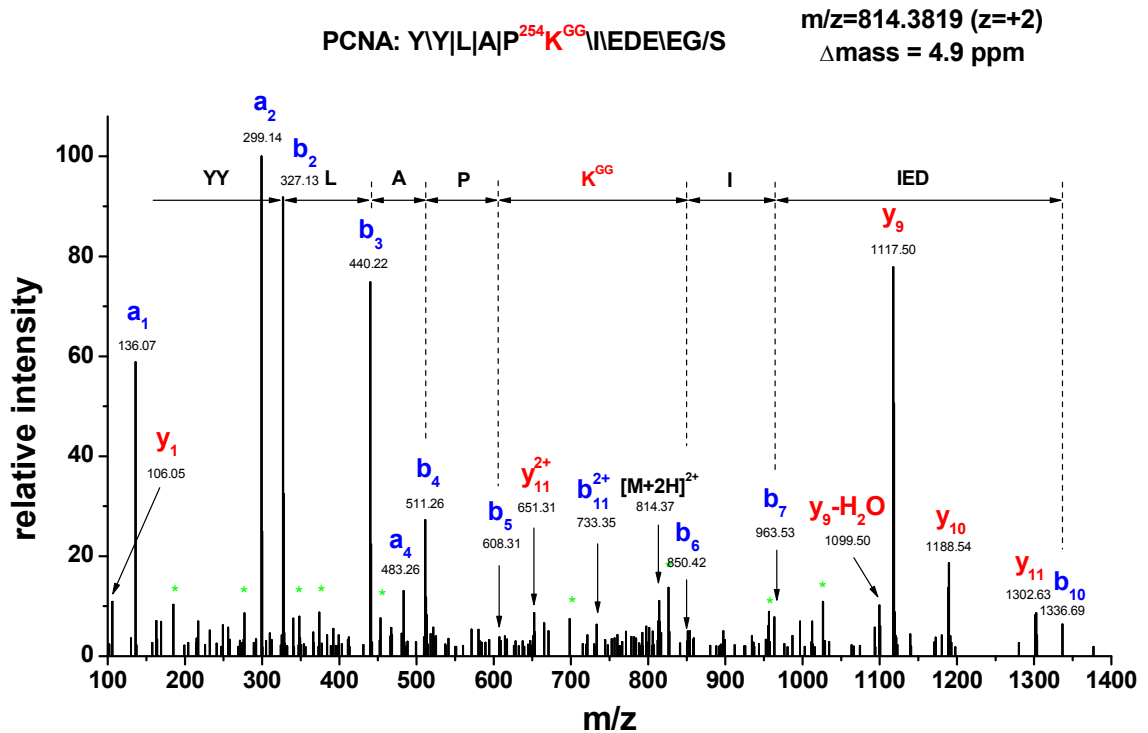

Tubulin  $\alpha$ 1A: GDV|V|P<sup>326</sup>K<sup>GG</sup>/D/V/N/A/A/I/A/T/I/K

$m/z=575.6588$  ( $z=+3$ )

$\Delta\text{mass} = 4.5$  ppm

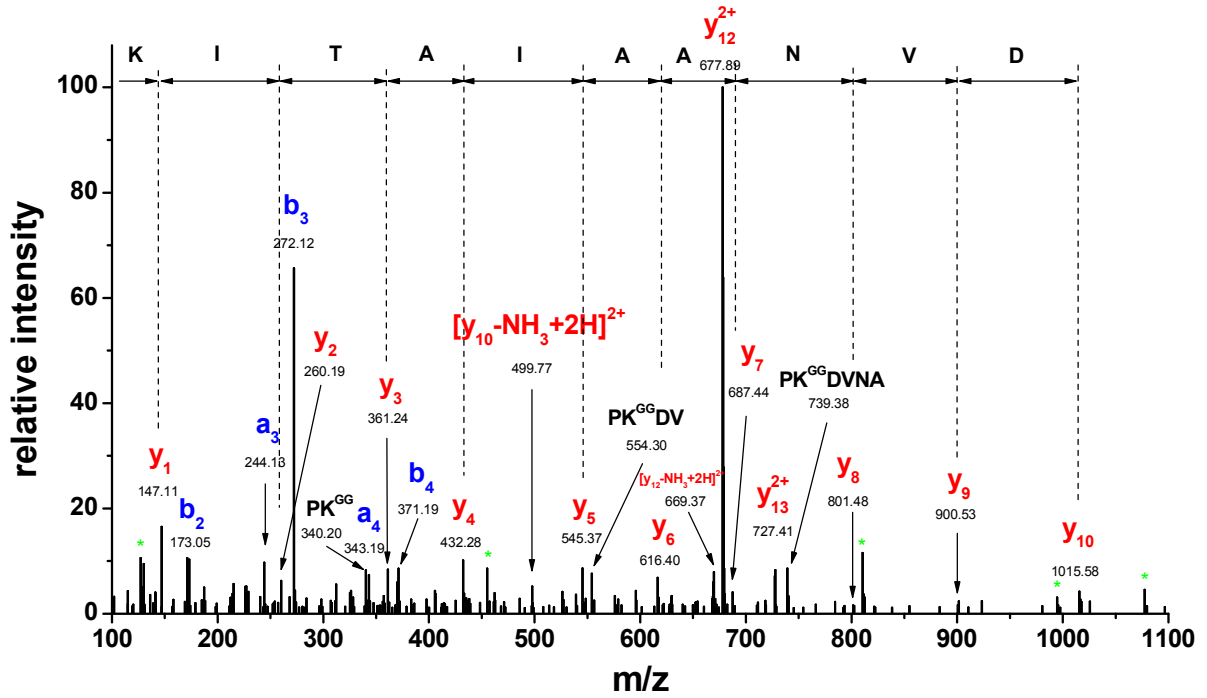

Tubulin  $\alpha$ 1A: D|V/N|A|A|I|A/T/I/<sup>336</sup>K<sup>GG</sup>/T/K

$m/z=453.5957$  ( $z=+3$ )

$\Delta\text{mass} = 6.4$  ppm

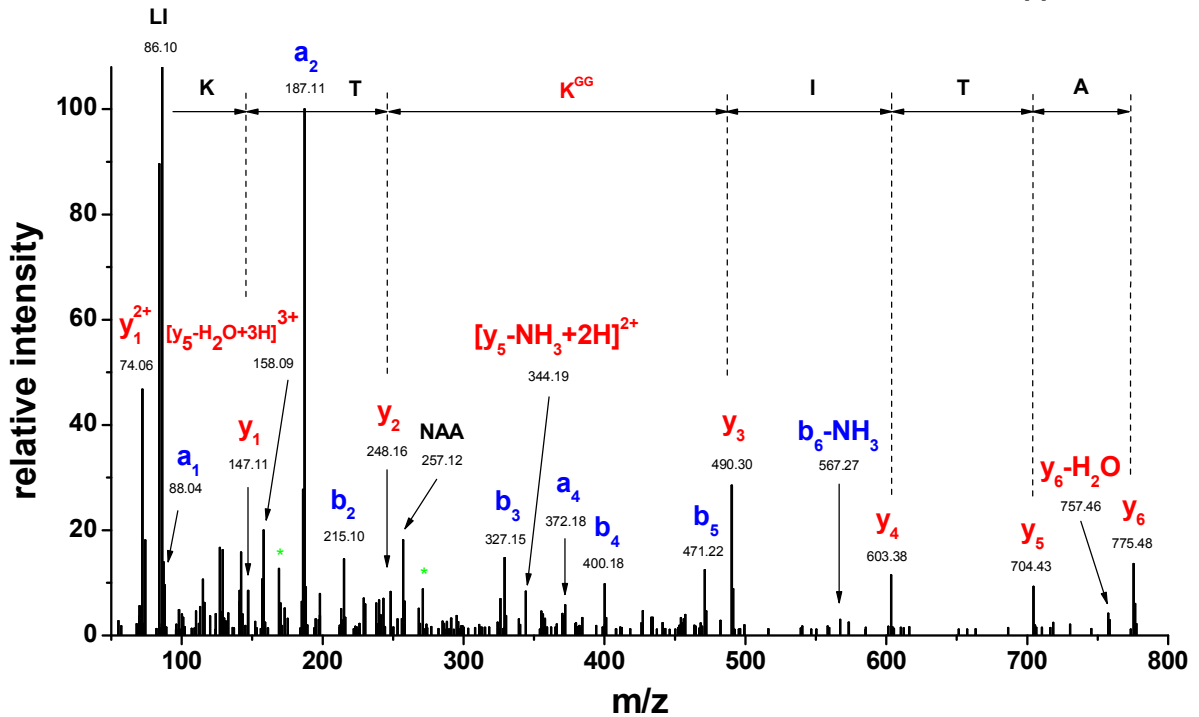



Tubulin  $\alpha$ 1A: VGINYQ|PP|TVV|P|G|G|D|L|A<sup>370</sup>K<sup>GG</sup>VQR

$m/z=774.7622$  ( $z=+3$ )

$\Delta\text{mass} = 6.7$  ppm

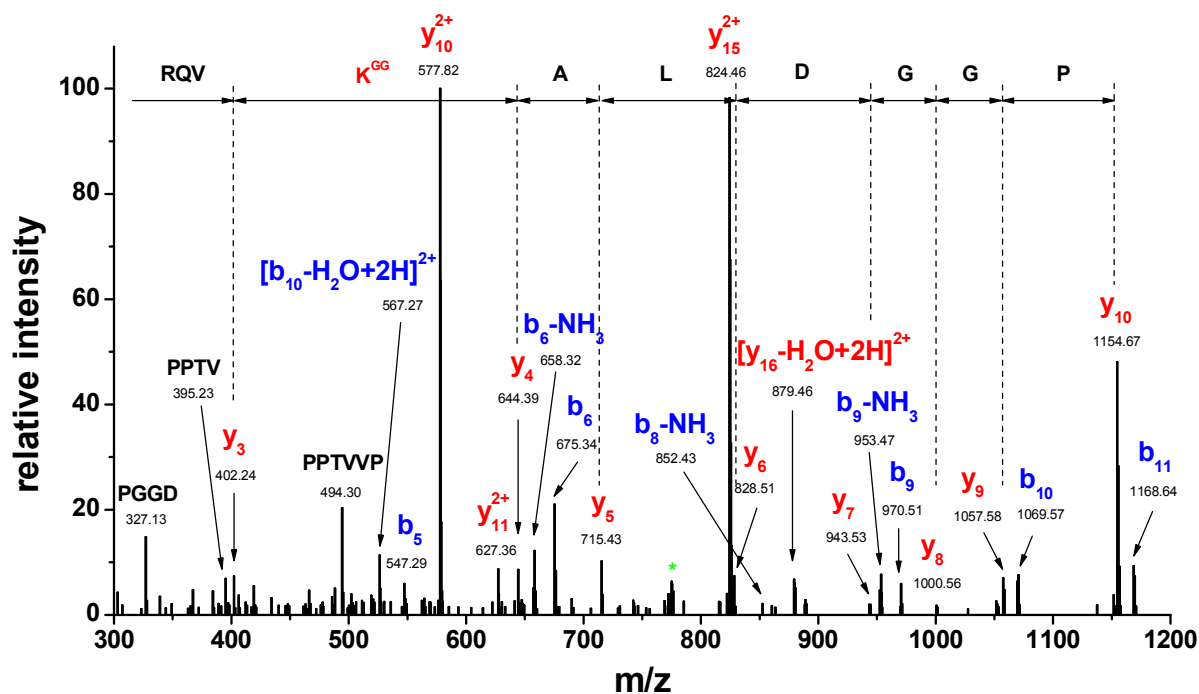

**Supplementary Fig. 16 Manually annotated MS/MS spectra of ubiquitinated peptides associated with microtubule inhibitor studies.**

In these spectra, the  $y$ -ions and  $b$ -ions are labeled in red and blue, respectively. The peaks associated with parental ions are labeled in black. The unmatched peaks are indicated by green asterisks (\*). The  $m/z$  values for  $y$ ,  $b$  ions and parental ions are provided for each matched peak. The  $m/z$ , charge state, the mass error of the precursor ions, and the fragmentation pattern of the peptides are shown in the spectra. As expected, all the major peaks are matched while only a few peaks with very low intensity are not matched.

## Supplementary Fig. 17

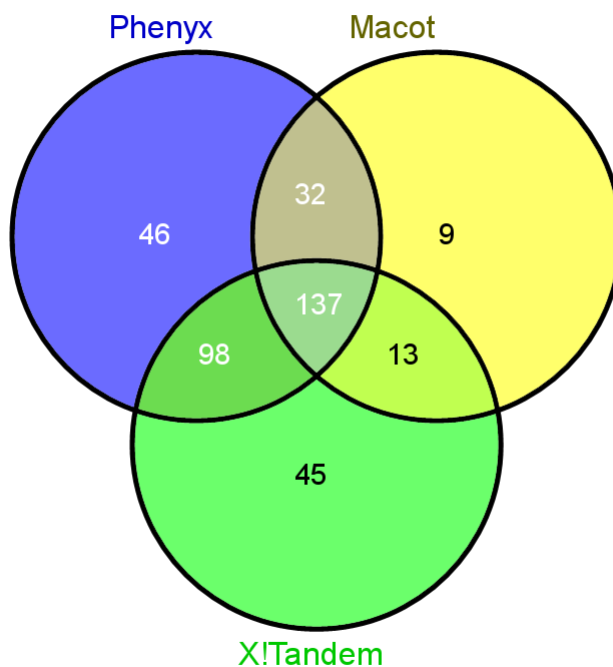

**Supplementary Fig. 17 A Venn diagram shows the overlap of the Spectrum Mill-identified ubiquitinated peptides (<1% false positive rate) based on their concurrent identification using other search programs: Mascot, X!Tandem, and Phenyx.**

The mgf file containing MS/MS fragments of all the ubiquitinated peptides identified by Spectrum Mill was submitted for online database searching by the three search programs listed above.

### **Websites for online search programs:**

Mascot: [http://www.matrixscience.com/search\\_form\\_select.html](http://www.matrixscience.com/search_form_select.html)

X!Tandem: <http://ppp.thegpm.org/tandem/ppp.html>

Phenyx: [http://www.genebio.com/products/phenyx/phenyx\\_online.html](http://www.genebio.com/products/phenyx/phenyx_online.html)

Supplementary Fig. 18

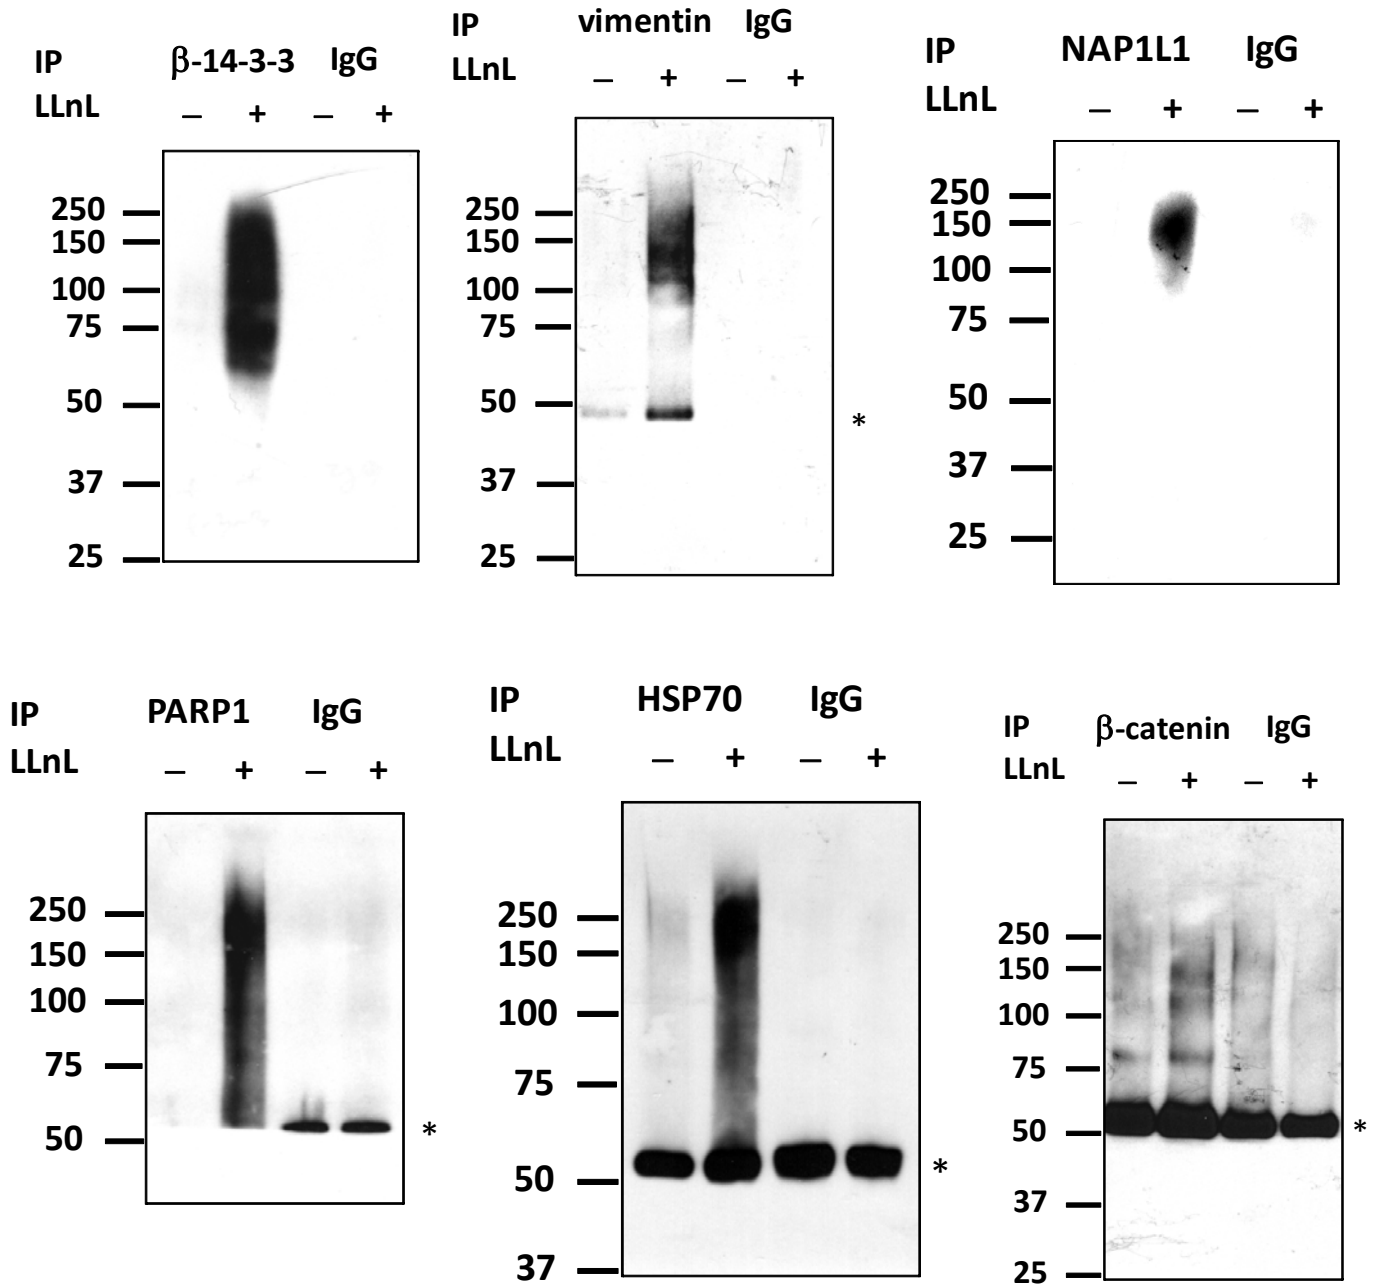

**Supplementary Fig. 18 Full-length blots for Fig. 2d.** The bands labeled with asterisks are likely IgG bands. Note: The original PVDF membrane for PARP1 blotting was cut at about 55 kDa after transferring the proteins to the membrane.

Supplementary Table 1. List of LC-MS/MS identified ubiquitin-remnant peptides with diglycine-modified lysines. The listed information includes charge state, score, Forward-Reverse score, the percentage of the scored peak intensity (SPI), modification sites, start amino acid number in the protein sequence, sequence map, measured mass, matched mass, mass shift, delta mass, molecular weight, uniprot accession #, protein name, Phenyx p-value, Mascot score and expectation value, XITandem log(e) value if available. The symbols, /, / and / represent b-ions, y-ions, and both b-ions and y-ions, respectively. Diglycine modified lysines are indicated as "K". In the treatment column, LLnL for LLnL treatment, and Both for both vehicle and LLnL treatment.

| #  | z | Score | Fwd-Rev Score | SPI (%) | Variable Sites | Start AA Position | Sequence Map                                  | m/z Measured (Da) | MH+ Matched (Da) | MH+ Mass Shift (Da) | MH+ Error (ppm) | Protein MW (Da) | Accession # | Protein Name                                           | Treatment | p value from Phenyx | Mascot Score | Mascot Expectation Value | XITandem log(e) value | Lysine Acetylation Site |
|----|---|-------|---------------|---------|----------------|-------------------|-----------------------------------------------|-------------------|------------------|---------------------|-----------------|-----------------|-------------|--------------------------------------------------------|-----------|---------------------|--------------|--------------------------|-----------------------|-------------------------|
| 1  | 3 | 19.31 | 11.91         | 80.4    | K51k           | 44                | (R)NLLLSVIA/VN/IV/GA/R(R)                     | 539.9755          | 1503.864         | 114.0478            | 3               | 28082.5         | P31946      | 14-3-3 protein beta/alpha                              | LLnL      | 5.17E-11            | 52           | 2.9E-04                  | -8.7                  | Y                       |
| 2  | 4 | 21.38 | 21.38         | 89.2    | K106k          | 95                | (K)LLCCDDIIVLDV/DH/IAA/N/TGE/SK(V)            | 703.1151          | 2695.379         | 114.0592            | 5.8             | 29174.1         | P62258      | 14-3-3 protein epsilon                                 | Both      | 1.40E-14            |              |                          | -4.8                  |                         |
| 3  | 3 | 23.12 | 23.12         | 93.4    | K196k          | 194               | (R)LAFAAADDVIA/A/EI/LD/TL/S/E/E/SYK(D)        | 838.751           | 2400.182         | 114.0568            | 5.5             | 29174.1         | P62258      | 14-3-3 protein epsilon                                 | Both      | 1.37E-42            | 69           | 7.0E-06                  | -16.6                 |                         |
| 4  | 3 | 12.54 | 12.54         | 62.0    | K60k           | 43                | (R)LLLSVIA/VN/IV/GA/R(R)                      | 544.6462          | 1517.88          | 114.0442            | 0.8             | 29174.1         | P62258      | 14-3-3 protein epsilon                                 | LLnL      | 4.67E-07            | 42           | 2.3E-03                  | -2.4                  | Y                       |
| 5  | 3 | 17.93 | 17.93         | 88.4    | K258k          | 250               | (R)VIGSELVQ/KV/LG/DGPK(L)                     | 806.3363          | 1702.937         | 114.0569            | 7.7             | 49184.8         | P62191      | 26S proteasome regulatory subunit 4                    | LLnL      | 1.17E-17            | 49           | 7.5E-04                  | -4                    | Y                       |
| 6  | 3 | 21.06 | 21.06         | 96.0    | K210k          | 201               | (R)FVNLIGIE/P/P/KGK/L/LG/P/P/GT/K(T)          | 784.442           | 2237.269         | 114.0422            | -0.3            | 48634.1         | P35998      | 26S proteasome regulatory subunit 7                    | LLnL      | 2.25E-14            | 44           | 1.3E-03                  | -7.5                  |                         |
| 7  | 3 | 10.94 | 10.94         | 62.0    | K222k          | 211               | (R)FVNLIGIE/P/P/KGK/L/LG/P/P/GT/K(LCA/R(A)    | 784.442           | 2237.269         | 114.0422            | -0.3            | 48634.1         | P35998      | 26S proteasome regulatory subunit 7                    | LLnL      | 1.04E-02            |              |                          | -1.3                  |                         |
| 8  | 3 | 13.24 | 8.16          | 76.0    | K222k          | 211               | (K)GVLVLF/G/P/P/GT/K(LCA/R(A)                 | 620.0099          | 1743.957         | 114.0577            | 8               | 48634.1         | P35998      | 26S proteasome regulatory subunit 7                    | LLnL      |                     |              |                          | -4.9                  |                         |
| 9  | 3 | 17.56 | 11.00         | 85.3    | K248k          | 240               | (R)VIGSELVQ/KV/YV/GG/GA/R(M)                  | 807.0052          | 1704.928         | 114.0731            | 16.6            | 48634.1         | P35998      | 26S proteasome regulatory subunit 7                    | LLnL      | 5.21E-09            | 31           | 3.3E-02                  | -4                    | Y                       |
| 10 | 3 | 12.49 | 12.49         | 69.4    | K310k          | 303               | (K)TSSAFV/Q/GT/PEASPE/P(K/D)                  | 616.311           | 1732.875         | 114.0432            | 0.2             | 105836.9        | Q99460      | 26S proteasome non-ATPase regulatory subunit 1         | LLnL      | 2.19E-05            |              |                          | -2.4                  | Y                       |
| 11 | 3 | 15.10 | 11.38         | 73.2    | K122k          | 109               | (R)HIIAIFV/GS/P/VEDNEK(LV/LK(L)               | 696.3765          | 1973.059         | 114.0566            | 6.2             | 40736.9         | P55036      | 26S proteasome non-ATPase regulatory subunit 4         | LLnL      |                     | 43           | 2.9E-03                  | -1.4                  |                         |
| 12 | 4 | 17.20 | 17.20         | 72.3    | K40k           | 6                 | (R)LQIAQQDVA/VN/IV/CH/SKTR(S)                 | 521.272           | 1968.008         | 114.0582            | 7.3             | 40736.9         | P55036      | 26S proteasome non-ATPase regulatory subunit 4         | LLnL      | 3.70E-10            |              |                          | -10.4                 |                         |
| 13 | 3 | 12.70 | 8.25          | 60.5    | K119k          | 107               | (R)IAIAYL/F/P/SGLFE/R(R(A)                    | 575.9879          | 1611.889         | 114.0598            | 9.8             | 48535.1         | P82933      | 28S ribosomal protein S9, mitochondrial                | LLnL      |                     |              |                          | -4.3                  |                         |
| 14 | 3 | 10.75 | 4.62          | 73.2    | K135k          | 128               | (K)LLIEGIL/PEKVL/S/LV/DD/PR(N)                | 669.7122          | 1893.069         | 114.0529            | 5               | 48117.7         | Q92821      | 39S ribosomal protein L37, mitochondrial               | LLnL      | 4.60E-06            |              |                          |                       |                         |
| 15 | 4 | 9.31  | 4.54          | 61.8    | K138k K139k    | 130               | (R)AVIPGGADKA/EAGASGAT/E/F/QFR(G)             | 655.8234          | 2392.189         | 228.026             | -1.2            | 18897.9         | P46783      | 40S ribosomal protein S10                              | LLnL      | 7.01E-07            |              |                          | -3.6                  |                         |
| 16 | 3 | 10.75 | 10.75         | 69.7    | K43k           | 43                | (K)KGLTSP/QI/GV/K(LR)                         | 499.3394          | 1381.853         | 114.0431            | 0.1             | 17722.4         | P62277      | 40S ribosomal protein S13                              | LLnL      | 6.84E-07            |              |                          | -3.2                  |                         |
| 17 | 3 | 14.88 | 14.88         | 74.3    | K43k           | 43                | (R)TAVNVAQV/LV/LG/K(E)                        | 499.3394          | 1381.853         | 114.0431            | 0.1             | 17722.4         | P62277      | 40S ribosomal protein S13                              | LLnL      | 1.08E-09            | 23           | 3.2E-02                  | -4.9                  |                         |
| 18 | 3 | 14.04 | 14.04         | 73.0    | K19k           | 15                | (R)VIIIEKY/YI/R(L)                            | 433.5779          | 1184.867         | 114.0518            | 6.8             | 15550.2         | P08708      | 40S ribosomal protein S17                              | LLnL      | 8.44E-16            | 32           | 2.3E-02                  | -2.6                  | Y                       |
| 19 | 3 | 14.47 | 9.31          | 64.0    | K18k           | 11                | (K)FVIADGFK/A/E/L/M/LTR(E)                    | 695.3736          | 1970.038         | 114.0681            | 12.1            | 26688.5         | P23396      | 40S ribosomal protein S3                               | LLnL      | 1.97E-05            |              |                          | -7.1                  |                         |
| 20 | 3 | 17.79 | 17.79         | 77.5    | K197k          | 188               | (K)MILP/PW/D/PTGK/GPK(K)                      | 556.3076          | 1562.586         | 114.0526            | 5.8             | 26688.5         | P23396      | 40S ribosomal protein S3                               | Both      | 9.70E-09            | 34           | 1.6E-02                  | -3.4                  |                         |
| 21 | 3 | 21.40 | 17.15         | 80.5    | K90k           | 77                | (R)F/GIF/PEGS/ELV/AEKV/ATR(G)                 | 705.3619          | 2000.012         | 114.0588            | 7.5             | 26688.5         | P23396      | 40S ribosomal protein S3                               | LLnL      | 1.16E-07            |              |                          | -3.1                  |                         |
| 22 | 4 | 10.37 | 10.37         | 60.6    | K142k          | 121               | (R)TLTVAHDVA/EDLV/F/P/SEV/GK(R(I)             | 660.1066          | 2523.382         | 114.0229            | -7.6            | 21217           | P62081      | 40S ribosomal protein S7                               | LLnL      | 9.43E-06            |              |                          | -1.5                  |                         |
| 23 | 3 | 16.64 | 16.64         | 76.5    | K49k           | 42                | (R)ELNII/AAK/E/IE/V/GGG/R(A)                  | 590.9872          | 1666.892         | 114.0555            | 7.1             | 21217           | P62081      | 40S ribosomal protein S7                               | LLnL      | 1.34E-06            | 35           | 2.2E-02                  | -4                    | Y                       |
| 24 | 3 | 18.77 | 4.31          | 93.2    | K128k          | 126               | (K)GAKL/TL/PE/E/IE/L/NK(K)                    | 562.3016          | 1570.832         | 114.0588            | 8.9             | 24205.3         | P62241      | 40S ribosomal protein S8                               | LLnL      | 6.09E-09            |              |                          | -3                    |                         |
| 25 | 2 | 11.43 | 11.43         | 71.9    | K344k K347k    | 339               | (R)LVGFKV/KAEIQGQV(K)                         | 851.4906          | 1473.879         | 228.0951            | 5.5             | 53802.2         | P49189      | 4-trimethylaminobutylaldehyde dehydrogenase            | LLnL      |                     |              |                          | -6.1                  |                         |
| 26 | 3 | 10.47 | 10.47         | 61.2    | K292k          | 291               | (R)LVVGS/QV/VV/AA/K(L)                        | 829.7442          | 1153.767         | 114.0419            | -0.8            | 61055           | P10809      | 60S kDa heat shock protein, mitochondrial              | LLnL      | 1.69E-05            | 28           | 1.4E-02                  | -1.2                  |                         |
| 27 | 3 | 18.01 | 18.01         | 96.3    | K193k          | 34                | (K)AAQVNI/ER/WR/IG/FI/A(K(A)                  | 400.9377          | 102.896          | 114.049             | 3               | 114             | P09386      | 60S acidic ribosomal protein P1                        | LLnL      | 1.72E-23            |              |                          | -9.6                  |                         |
| 28 | 3 | 20.91 | 20.91         | 82.6    | K21k           | 3                 | (R)YVIAISYL/VA/LK/GN/SS/PSA/K/DI(K(K)         | 770.4125          | 2225.181         | 114.0417            | -0.5            | 11665           | P05387      | 60S acidic ribosomal protein P2                        | Vehicle   |                     | 31           | 4.9E-02                  | -4.7                  | Y                       |
| 29 | 3 | 10.66 | 10.66         | 75.3    | K41k           | 39                | (R)LNKVI/SEL/NQ/K(N)                          | 443.589           | 1214.71          | 114.0421            | -0.6            | 11665           | P05387      | 60S acidic ribosomal protein P2                        | Both      | 4.12E-11            | 35           | 2.1E-02                  | -2                    |                         |
| 30 | 4 | 17.22 | 17.22         | 81.7    | K61k           | 50                | (K)NIEDVIAQIGK/LASV/PAGGAV/ASA/PA/PA/AAAEK(K) | 1032.2902         | 4012.099         | 114.0404            | -0.6            | 11665           | P05387      | 60S acidic ribosomal protein P2                        | LLnL      |                     |              |                          | -4.7                  |                         |
| 31 | 3 | 16.61 | 16.61         | 73.4    | K169k          | 165               | (R)WVFPQK/V/D/GI/LP/GK(-)                     | 602.9926          | 1692.911         | 114.0524            | 5.3             | 20252.5         | P62913      | 60S ribosomal protein L11                              | LLnL      |                     |              |                          | -2.5                  |                         |
| 32 | 3 | 11.91 | 11.91         | 73.8    | K38k           | 64                | (R)AAKIVL/QL/TGQ/T/PW/F/SK(A)                 | 644.3697          | 1817.017         | 114.0478            | 2.5             | 20252.5         | P62913      | 60S ribosomal protein L11                              | LLnL      | 4.21E-20            |              |                          | -4.5                  |                         |
| 33 | 4 | 15.00 | 15.00         | 70.7    | K140k          | 129               | (K)FFVEV/L/DL/P/F/HK/IA/R(R)                  | 490.529           | 1845.042         | 114.0522            | 4.6             | 24146.2         | P61313      | 60S ribosomal protein L15                              | Both      | 4.36E-10            |              |                          |                       |                         |
| 34 | 3 | 10.85 | 10.85         | 63.6    | K13k           | 4                 | (R)YSLD/P/EN/P/Tk/SCK(S)                      | 551.5956          | 1538.716         | 114.0567            | 8.3             | 21397.2         | P18621      | 60S ribosomal protein L17                              | LLnL      |                     |              |                          | -2                    |                         |
| 35 | 3 | 15.94 | 15.94         | 87.0    | K119k          | 116               | (R)AGKQ/LV/L/DQ/LA/LD/S/PK(G)                 | 630.0122          | 1773.975         | 114.0475            | 2.4             | 21634.6         | Q07020      | 60S ribosomal protein L18                              | Both      | 6.77E-22            | 41           | 4.5E-03                  | -6.9                  |                         |
| 36 | 2 | 15.72 | 8.52          | 79.4    | K152k          | 140               | (R)LDYADYAD/IDV/AN/KI/G(K)                    | 958.0189          | 1800.974         | 114.0563            | 7               | 17695.1         | P62750      | 60S ribosomal protein L23a                             | Both      | 4.74E-09            |              |                          | -4.6                  |                         |
| 37 | 3 | 13.93 | 12.54         | 83.3    | K193k          | 31                | (K)VLEI/SF/SYCY/LV/LG/R(R)                    | 424.933           | 1215.4           | 114.0478            | 10              | 17779.9         | P83713      | 60S ribosomal protein L24                              | LLnL      | 3.35E-09            |              |                          | -1.5                  |                         |
| 38 | 3 | 10.72 | 5.29          | 66.3    | K27k           | 24                | (R)TDGK/VF/Q/L/NA/K(K)                        | 494.5992          | 1367.732         | 114.0513            | 5.6             | 17779.1         | P83713      | 60S ribosomal protein L24                              | both      | 1.52E-09            |              |                          |                       |                         |
| 39 | 3 | 19.09 | 12.97         | 80.8    | K93k           | 81                | (R)AII/TGAS/LA/D/MI/AAK/R(N)                  | 511.2838          | 1417.783         | 114.0537            | 7               | 17779.1         | P83713      | 60S ribosomal protein L24                              | Both      |                     |              |                          | -1.8                  | Y                       |
| 40 | 4 | 13.95 | 8.06          | 81.5    | K134k          | 129               | (K)AKDQTD/AAQAA/PAISV/PIA/Q/PAK(R)            | 541.5496          | 2049.109         | 114.0678            | 11.5            | 17752.2         | P47914      | 60S ribosomal protein L29                              | Vehicle   |                     |              |                          | -1.7                  |                         |
| 41 | 3 | 16.01 | 16.01         | 76.3    | K149k          | 135               | (K)AQAA/IA/PA/SV/PA/Q/PAK(R)                  | 549.9682          | 1533.85          | 114.0404            | -1.5            | 17752.2         | P47914      | 60S ribosomal protein L29                              | LLnL      | 3.99E-17            |              |                          | -5.2                  |                         |
| 42 | 4 | 13.22 | 13.22         | 62.8    | K131k          | 126               | (K)GDV/P/IT/WR/PP/VL/R(A)                     | 362.9671          | 1334.79          | 114.0563            | 9.2             | 29995.8         | P62424      | 60S ribosomal protein L7a                              | LLnL      |                     |              |                          | -1.4                  |                         |
| 43 | 3 | 18.45 | 18.45         | 86.5    | K217k          | 213               | (K)GALIA/LK/VA/IR(T)                          | 418.9225          | 1140.71          | 114.043             | 0.1             | 29995.8         | P62424      | 60S ribosomal protein L7a                              | LLnL      | 1.15E-08            | 61           | 1.7E-05                  | -4                    | Y                       |
| 44 | 3 | 13.40 | 13.40         | 65.8    | K302k          | 296               | (R)WVIT/SQ/LK/ST/Q/A/EAL/R(L)                 | 682.7085          | 1932.055         | 114.056             | 6.4             | 59609.5         | P16875      | 6-phosphofructo-2-kinase/fructose-2,6-bisphosphatase 3 | LLnL      | 6.56E-05            |              |                          |                       |                         |
| 45 | 3 | 11.93 | 11.93         | 74.5    | K59k           | 52                | (K)VVIGV/SQ/LK/AMV/S(K(L)                     | 497.2807          | 1375.761         | 114.0662            | 15.6            | 53140.3         | P52209      | 6-phosphogluconate dehydrogenase, decarboxylating      | LLnL      | 6.33E-11            |              |                          | -3.9                  | Y                       |
| 46 | 5 | 16.48 | 16.48         | 65.3    | K98k           | 92                | (R)YFIEHIGIT/WT/D/MI/EK/WHHFTFYNE/LR(V)       | 715.1473          | 3457.642         | 114.0651            | 6.2             | 42019.2         | P68032      | Actin, alpha cardiac muscle 1                          | LLnL      | 9.62E-05            |              |                          |                       |                         |
| 47 | 3 | 16.27 | 8.07          | 79.8    | K193k          | 186               | (R)DLT/DY/LM/KIL/TER(R)                       | 576.6383          | 1610.846         | 114.0545            | 6.3             | 42019.2         | P62736      | Actin, aortic smooth muscle                            | LLnL      | 2.61E-11            |              |                          |                       |                         |
| 48 | 3 | 13.37 | 9.06          | 80.3    | K328k          | 318               | (K)EITLAL/P/ST/MK/I(K)                        | 506.2871          | 1402.797         | 114.0493            | 4.2             | 42009.2         | P62736      | Actin, aortic smooth muscle                            | Both      | 3.07E-10            |              |                          | -2.3                  | Y                       |
| 49 | 3 | 11.50 | 11.50         | 63.6    | K330k          | 329               | (K)KIIIA/PP/PE/R(K)                           | 384.2395          | 1036.651         | 114.0526            | 8.4             | 42009.2         | P62736      | Actin, aortic smooth muscle                            | LLnL      | 5.49E-05            | 35           | 2.7E-03                  | -3                    | Y                       |
| 50 | 4 | 13.67 | 6.40          | 78.9    | K113k          | 96                | (R)VAIPEEHVLL/TEA/PL/N/PKAN(R)                | 603.0837          | 2295.246         | 114.0674            | 10.2            | 41737           | P60709      | Actin, cytoplasmic 1                                   | LLnL      |                     |              |                          | -3.3                  |                         |
| 51 | 3 | 17.04 | 17.04         | 74.6    | K291k          | 291               | (R)KDLANTVIL/S/G/GT/T/M/V/PGI/AD/R(M)         | 819.7483          | 2343.165         | 114.0654            | 9.2             | 41737           | P60709      | Actin, cytoplasmic 1                                   | LLnL      | 8.25E-12            | 63           | 2.8E-04                  | -7.3                  |                         |
| 52 | 4 | 14.06 | 10.22         | 75.6    | K196k K209k    | 195               | (K)KEGSTLD/LS/D/EAEL/V/MF/Q/R(R)              | 660.0925          | 2409.233         | 228.1152            | 11.1            | 41522.9         | Q00767      | AcyL-CoA desaturase                                    | LLnL      |                     |              |                          | -4.4                  |                         |
| 53 | 3 | 19.65 | 19.65         | 80.6    | K209k          | 197               | (K)GSTL/D/LS/DEAE/K/LV/MF/Q/R(R)              | 756.0563          | 2152.095         | 114.0589            | 7               | 41522.9         | Q00767      | AcyL-CoA desaturase                                    | LLnL      | 5.12E-11            | 33           | 2.6E-02                  | -7.1                  |                         |
| 54 | 3 | 12.98 | 12.98         | 66.2    | K12k           | 5                 | (R)LLLLNDGAK/M/PL/GLGTWK(S)                   | 686.0626          | 1939.12          | 114.0535            | 5.1             | 35853.6         | F15121      | Acyl-CoA desaturase                                    | LLnL      | 5.39E-05            |              |                          |                       |                         |
| 55 | 4 | 16.24 | 16.24         | 85.8    | K153k          | 141               | (K)IAIHEQ/SSADY/V/GEES/NS/SANK(C)             | 669.8034          | 2562.138         | 114.0539            | 4.1             | 33232.9         | P54920      | Alpha-spectin NSF attachment protein                   | LLnL      | 2.09E-13            |              |                          | -2.9                  |                         |
| 56 | 3 | 17.23 | 11.41         | 85.4    | K239k          | 227               | (R)LTSP/VI/NT/ISD/V/IAE/FR(T)                 | 745.0643          | 2119.139         | 114.039             | -1.8            | 6719.4          | Q91207      | Annkyn repeat domain-containing protein 13A            | LLnL      | 2.45E-12            | 45           | 1.9E-03                  |                       |                         |
| 57 | 3 | 13.18 | 13.18         | 73.8    | K193k          | 186               | (K)EITLAL/P/ST/MK/I(R)                        | 506.2871          | 1402.797         | 114.0493            | 4.2             | 42009.2         | P62736      | Aspartic chromatin condensation inducer in the nucleus | LLnL      |                     |              |                          |                       |                         |

|     |   |       |       |       |             |      |                                           |          |          |          |       |          |        |                                                                     |         |          |    |         |  |       |
|-----|---|-------|-------|-------|-------------|------|-------------------------------------------|----------|----------|----------|-------|----------|--------|---------------------------------------------------------------------|---------|----------|----|---------|--|-------|
| 100 | 4 | 12.30 | 9.05  | 66.7  | K158k K174k | 157  | (K)YKLLPEV/P/IGVLSDVQ/E/EKGI(Y)           | 659.1031 | 2405.296 | 228.0943 | 3.2   | 21452.9  | P00374 | Dihydrofolate reductase                                             | LlNl    | 2.68E-06 |    |         |  |       |
| 101 | 3 | 14.32 | 14.32 | 64.8  | K1121k      | 1105 | (K)MQE/VV/ANLQ/D/IGD/GSMR(E)              | 719.0064 | 2040.948 | 114.0569 | 6.5   | 126968.6 | Q15531 | DNA damage-binding protein 1                                        | LlNl    | 2.20E-06 |    |         |  | -1.7  |
| 102 | 3 | 14.96 | 14.96 | 80.8  | K1131k      | 1123 | (R)EATADDL/K/VV/E/LTR(I)                  | 639.3408 | 1801.954 | 114.0537 | 5.6   | 126968.6 | Q15531 | DNA damage-binding protein 1                                        | LlNl    | 3.98E-17 |    |         |  | -3.2  |
| 103 | 4 | 21.81 | 21.81 | 87.6  | K600k       | 585  | (R)SVLHEVME/QQ/TL/S/AK/A/GIIC/Q/LNAR(T)   | 755.6606 | 2909.534 | 114.0877 | 14.6  | 96558.4  | P33991 | DNA replication licensing factor MCM4                               | LlNl    | 1.30E-16 | 52 | 2.7E-04 |  | -15.7 |
| 104 | 4 | 11.14 | 14.71 | 76.9  | K158k       | 133  | (R)FVFLWYQ/G/S/NW/R(V)                    | 483.5754 | 1825.394 | 114.0874 | 9.5   | 81308.4  | P33993 | DNA replication licensing factor MCM7                               | LlNl    | 5.61E-12 | 46 | 1.2E-03 |  | -4.6  |
| 105 | 4 | 12.84 | 12.84 | 67.0  | K175k       | 179  | (R)YKALFDADVAQ/VEI/LPQY(E)                | 704.3831 | 1897.074 | 114.0605 | 6.0   | 11455.05 | P1455E | DNA replication licensing factor MCM7                               | LlNl    | 1.45E-05 |    |         |  | -1.8  |
| 106 | 3 | 14.63 | 8.22  | 81.0  | K252k       | 249  | (K)LSIPKAEV/ATFF/AK(M)                    | 551.2996 | 1537.826 | 114.0582 | 9.2   | 90726.2  | P11387 | DNA topoisomerase 1                                                 | LlNl    | 7.98E-06 |    |         |  | -1.8  |
| 107 | 3 | 22.58 | 11.81 | 93.5  | K129k       | 117  | (R)LLIIP/SPSQ/V/SVQ/G/K/EL/LR(L)          | 675.2767 | 1911.111 | 114.0566 | 6.4   | 25370.7  | OXNS09 | DNA-damage-inducible transcript 4 protein                           | LlNl    |          | 41 | 1.8E-03 |  |       |
| 108 | 3 | 18.95 | 12.68 | 87.9  | K344k       | 339  | (K)LSL/SL/EL/LP/LP/R(K)                   | 475.6231 | 1310.804 | 114.0505 | 5.3   | 45610.1  | P31689 | DnaJ homolog subfamily A member 1                                   | Vehicle | 1.25E-10 | 41 | 1.1E-03 |  | -5.7  |
| 109 | 3 | 17.18 | 17.18 | 77.9  | K82k        | 75   | (R)QIJJIN/PQNK/A/DF/Q/G/S/PE/R(A)         | 723.7129 | 2055.062 | 114.0624 | 9     | 12496.8  | P61803 | Ubiquitin-diphosphoglucosyltransferase subunit DAD1                 | LlNl    | 1.24E-08 |    |         |  | -2.1  |
| 110 | 4 | 17.04 | 17.04 | 66.9  | K67k        | 59   | (R)FLAE/EGFV/G/HV/NW/DF/D(R)              | 584.5247 | 2221.014 | 114.0632 | 8.7   | 80530.1  | P49477 | Dolichyl-diphosphoglucosyltransferase subunit STT3A                 | LlNl    | 1.62E-07 |    |         |  |       |
| 111 | 3 | 15.97 | 15.97 | 69.9  | K255k       | 240  | (R)MAIA/G/GF/TV/S/G/P/SSA/C/G/PGR(S)      | 625.9685 | 1761.837 | 114.0539 | 5.8   | 289596.3 | Q4U978 | E3 ubiquitin-protein ligase HECTD1                                  | LlNl    | 1.80E-24 | 46 | 6.8E-04 |  | -4.9  |
| 112 | 4 | 21.48 | 21.48 | 92.2  | K3345k      | 3335 | (R)HVLDT/LUJ/Q/LK/AV/F/PSHF/TQQR(T)       | 618.6605 | 2478.362 | 114.0586 | 6.1   | 481893.3 | Q72627 | E3 ubiquitin-protein ligase HUWE1                                   | LlNl    | 9.53E-17 | 36 | 1.0E-02 |  | -12.6 |
| 113 | 3 | 15.92 | 15.92 | 76.2  | K448k       | 433  | (K)EFP/DLP/LFK/PLIP/PWGR(K)               | 677.9902 | 1737.896 | 114.0602 | 9.3   | 102803.3 | Q96302 | E3 ubiquitin-protein ligase Itchy homolog                           | LlNl    | 9.47E-06 |    |         |  |       |
| 114 | 3 | 16.40 | 16.40 | 63.8  | K298k       | 26   | (K)WVKG/DIG/EG/SH/V/VG/26                 | 624.8676 | 1533.772 | 114.0589 | 6.5   | 44013.8  | Q86176 | E3 ubiquitin-protein ligase MIB1                                    | LlNl    | 1.33E-12 |    |         |  | -1.9  |
| 115 | 3 | 17.30 | 10.70 | 89.5  | K128k       | 26   | (K)KLE/PT/EG/ST/SL/NLE/E/VK(R)            | 696.3302 | 1978.997 | 114.0606 | 8.4   | 110136.6 | Q96376 | E3 ubiquitin-protein ligase MIB1                                    | LlNl    | 1.33E-23 | 43 | 2.3E-03 |  |       |
| 116 | 3 | 13.52 | 13.52 | 80.5  | K197k       | 187  | (K)RAIIP/PPS/TS/TL/KQV/T/K(V)             | 425.9971 | 1668.928 | 114.0488 | 3.3   | 56194.9  | OXNS91 | E3 ubiquitin-protein ligase RAD18                                   | LlNl    | 1.24E-25 | 34 | 2.0E-02 |  |       |
| 117 | 3 | 23.47 | 13.51 | 100.0 | K305k       | 296  | (K)SAIA/II/IIQ/VE/IE/NI/EK/TR(M)          | 648.6796 | 1829.96  | 114.0639 | 10.8  | 56194.9  | OXNS91 | E3 ubiquitin-protein ligase RAD18                                   | Both    | 9.54E-33 | 65 | 2.3E-05 |  |       |
| 118 | 3 | 14.42 | 6.21  | 75.1  | K318k       | 314  | (R)LEIASK/LNE/S/V/M/V/F/T/K(D)            | 603.9905 | 1695.899 | 114.0584 | 8.5   | 56194.9  | OXNS91 | E3 ubiquitin-protein ligase RAD18                                   | LlNl    | 3.04E-10 |    |         |  |       |
| 119 | 4 | 18.78 | 12.87 | 86.4  | K334k       | 329  | (R)LG/E/TQK/AML/D/PP/K/PS/R(G)            | 471.2606 | 1767.942 | 114.0784 | 18.8  | 51219    | Q96BH1 | E3 ubiquitin-protein ligase RNF25                                   | Both    | 5.08E-09 | 32 | 3.0E-02 |  |       |
| 120 | 4 | 14.45 | 6.37  | 77.9  | K334k K341k | 399  | (R)LG/ETQ/AMLD/PP/K/PS/R(G)               | 499.766  | 1767.942 | 228.1    | 7.1   | 51219    | Q96BH1 | E3 ubiquitin-protein ligase RNF25                                   | Both    | 5.08E-09 | 30 | 5.1E-02 |  | -1.4  |
| 121 | 3 | 12.33 | 9.21  | 72.9  | K172k       | 167  | (R)YIEV/IE/KV/S/T/Y/K(K)                  | 572.3043 | 1600.847 | 114.0515 | 5     | 50141.1  | P68104 | Elongation factor 1-alpha 1                                         | LlNl    | 3.07E-10 |    |         |  | Y     |
| 122 | 4 | 15.43 | 15.43 | 74.4  | K244k       | 220  | (K)DGNASG/TLL/EA/LD/C/LP/P/PT/R/D/KPLR(L) | 784.6663 | 3021.567 | 114.0706 | 10.6  | 50141.1  | P68104 | Elongation factor 1-alpha 1                                         | LlNl    |          |    |         |  | -2    |
| 123 | 3 | 14.91 | 14.91 | 77.9  | K255k       | 248  | (R)TLR/QDQ/V/K/I/G/G/I/V/P/V/GR(V)        | 499.4021 | 1982.143 | 114.0484 | 2.6   | 50141.1  | P68104 | Elongation factor 1-alpha 1                                         | LlNl    | 1.53E-06 |    |         |  | -3.4  |
| 124 | 3 | 13.94 | 11.41 | 82.2  | K273k       | 267  | (R)YIEV/ELV/P/PM/VIT/FA/P/IN/VTV/TK(S)    | 877.7123 | 252.384  | 114.0586 | 6     | 50141.1  | P68104 | Elongation factor 1-alpha 1                                         | LlNl    | 2.05E-05 |    |         |  | -1.5  |
| 125 | 3 | 14.06 | 10.8  | 71.7  | K201k       | 197  | (R)ILG/L/DVY/AT/RT(R)                     | 497.3001 | 1275.874 | 114.0585 | 8.1   | 101119.1 | P44606 | Elongation factor 1-gamma                                           | LlNl    | 3.79E-06 |    |         |  | -2.1  |
| 126 | 3 | 15.38 | 15.38 | 73.7  | K235k       | 236  | (K)FAAK/EGG/Q/L/G/P/A/E/R(A)              | 515.6027 | 1430.739 | 114.0549 | 7.7   | 95338.7  | P13639 | Elongation factor 2                                                 | Vehicle |          |    |         |  | -1.1  |
| 127 | 3 | 17.65 | 17.65 | 77.4  | K42k        | 33   | (K)IST/IL/D/SL/V/K/A/G/IA/S/A/R(A)        | 659.6908 | 1863     | 114.0574 | 7.3   | 95338.7  | P13639 | Elongation factor 2                                                 | LlNl    | 6.99E-12 | 41 | 4.5E-03 |  | -4.7  |
| 128 | 3 | 14.58 | 14.58 | 71.4  | K845k       | 843  | (K)GLK/EG/PI/AL/D/N/F/L/D/K(L)            | 619.6801 | 1742.969 | 114.0577 | 7.6   | 95338.7  | P13639 | Elongation factor 2                                                 | Both    | 1.02E-11 | 35 | 1.8E-02 |  | -4.5  |
| 129 | 3 | 12.86 | 12.86 | 65.3  | K256k       | 253  | (R)DLE/PFL/L/PV/EAV/V/S/V/PGR(G)          | 748.4104 | 2129.164 | 114.0525 | 4.3   | 49541.8  | P49411 | Elongation factor 2, mitochondrial                                  | LlNl    | 2.70E-06 |    |         |  | -1.9  |
| 130 | 3 | 11.84 | 11.84 | 67.1  | K133k       | 124  | (R)S/AAL/E/IE/AD/M/LFR(T)                 | 565.2947 | 1579.815 | 114.0547 | 6.9   | 20875.7  | Q9Y6B2 | EP300-interacting inhibitor of differentiation 1                    | LlNl    | 1.17E-10 | 33 | 2.3E-02 |  |       |
| 131 | 3 | 20.25 | 20.25 | 83.8  | K107k       | 98   | (K)ENM/Y/AV/Q/TL/D/DF/Q/VV/D(R)           | 745.3607 | 2120.012 | 114.0558 | 5.8   | 57575.6  | Q9Y613 | Epsin-1                                                             | Both    | 2.56E-08 | 39 | 3.8E-03 |  |       |
| 132 | 4 | 18.52 | 18.52 | 81.4  | K146k       | 142  | (R)IAE/VQ/LQ/ME/APH/II/V/IG/TPGR(V)       | 572.8169 | 1714.175 | 114.0707 | 12.2  | 46154.2  | P68842 | Eukaryotic initiation factor 4A-1                                   | LlNl    | 8.61E-06 | 45 | 1.5E-03 |  | -4.9  |
| 133 | 3 | 14.08 | 14.08 | 65.9  | K177k       | 175  | (R)KAE/PM/VL/D/IE/AD/ML/SR(G)             | 692.0114 | 1959.955 | 114.0642 | 10.3  | 46154.2  | P68842 | Eukaryotic initiation factor 4A-1                                   | LlNl    | 1.09E-28 | 51 | 3.9E-04 |  | -6    |
| 134 | 3 | 15.33 | 10.53 | 69.6  | K193k       | 191  | (R)YFGR/QD/Y/IE/Q/K(L)                    | 533.2385 | 1501.769 | 114.0582 | 11.4  | 46154.2  | P68842 | Eukaryotic initiation factor 4A-1                                   | LlNl    | 9.56E-10 |    |         |  | -2.3  |
| 135 | 3 | 25.87 | 25.87 | 98.4  | K54k        | 46   | (R)G/Y/IA/V/EG/FP/IS/AIQOR(A)             | 64.9989  | 1827.938 | 114.0436 | 0.6   | 46154.2  | Q96324 | Eukaryotic initiation factor 4A-1                                   | LlNl    | 1.44E-24 | 51 | 3.9E-04 |  | -9.2  |
| 136 | 3 | 19.96 | 14.92 | 89.4  | K69k        | 83   | (K)RAIIP/CKY/DY/IA/Q/A/Q/S/IG/T(G)        | 768.7448 | 2190.159 | 114.0659 | 10    | 46420.5  | Q14240 | Eukaryotic initiation factor 4A-1L                                  | Both    | 1.32E-16 | 43 | 3.1E-03 |  | -3.9  |
| 137 | 4 | 18.38 | 12.01 | 78.3  | K68k        | 68   | (K)KY/ED/IC/PS/T/THNM/D/P/N/K(R)          | 569.5195 | 2611.005 | 114.0509 | 3.5   | 16832.4  | P63241 | Eukaryotic translation initiation factor 5A-1                       | LlNl    | 2.60E-12 |    |         |  | -8.1  |
| 138 | 4 | 12.40 | 12.40 | 64.6  | K85k        | 67   | (K)YED/ICP/ST/HNM/D/P/N/K(R)              | 576.521  | 2189.011 | 114.0508 | 3.4   | 16832.4  | P63241 | Eukaryotic translation initiation factor 5A-1                       | LlNl    | 6.93E-08 | 34 | 7.3E-03 |  | -5.2  |
| 139 | 2 | 11.09 | 2.32  | 82.0  | K224k       | 218  | (K)YLS/IFLEK/RQ(K)                        | 713.3881 | 1311.742 | 114.0227 | -11.2 | 58305.1  | Q8NP7  | Exonuclease 3'-5' domain-like-containing protein 1                  | LlNl    |          |    |         |  | -4.1  |
| 140 | 4 | 12.97 | 12.97 | 70.9  | K157k       | 147  | (K)T/GD/VED/ST/V/LK/SLH/LP(K)             | 489.0165 | 1838.986 | 114.0584 | 7.9   | 73954.5  | Q9UNN5 | FAS-associated factor 1                                             | LlNl    | 1.05E-07 |    |         |  | -3.6  |
| 141 | 3 | 13.98 | 10.00 | 79.2  | K457k       | 445  | (K)TDQ/FLP/LI/II/M/GK(S)                  | 598.3349 | 1678.935 | 114.0552 | 6.9   | 73954.5  | Q9UNN5 | FAS-associated factor 1                                             | LlNl    | 1.91E-18 | 29 | 4.8E-02 |  | -3    |
| 142 | 3 | 21.54 | 16.95 | 91.2  | K28k        | 23   | (R)IVIA/PGK/L/A/A/D/E/ST/GSI/AK(R)        | 671.3761 | 1898.059 | 114.0544 | 5.7   | 39420.2  | P04075 | Fructose-bisphosphate aldolase A                                    | LlNl    | 8.18E-11 | 41 | 3.4E-03 |  | -5.2  |
| 143 | 3 | 13.70 | 8.89  | 72.6  | K42k        | 29   | (K)GII/L/A/D/E/ST/GS/AK(R)                | 534.9567 | 1488.802 | 114.0539 | 6.8   | 39420.2  | P04075 | Fructose-bisphosphate aldolase A                                    | LlNl    | 3.98E-05 | 43 | 3.2E-03 |  | -3.4  |
| 144 | 3 | 11.39 | 11.39 | 69.3  | K193k       | 52   | (R)YFGR/VL/Q/TE/T/IG/V/V/PEQFM(K/S)       | 352.7833 | 242.274  | 114.0616 | 7.3   | 239.2    | Q96826 | Glucosamine 6-phosphate N-acetyltransferase                         | LlNl    | 7.13E-04 |    |         |  |       |
| 145 | 3 | 12.06 | 12.77 | 63.3  | K194k       | 18   | (K)T/D/IG/PS/K/W/R(D)                     | 1215.644 | 215.644  | 114.0505 | 5.1   | 26053.2  | P04406 | Glyceroldehyde-3-phosphate dehydrogenase                            | LlNl    | 8.38E-09 | 45 | 1.9E-03 |  | -1    |
| 146 | 3 | 17.41 | 12.97 | 87.2  | K215k       | 201  | (R)GAL/GI/IN/PAST/GA/AK/AV/GK(V)          | 627.6945 | 1767.012 | 114.0586 | 7.3   | 36053.4  | P04406 | Glyceroldehyde-3-phosphate dehydrogenase                            | LlNl    | 8.75E-12 | 45 | 7.9E-04 |  | -9.3  |
| 147 | 3 | 16.01 | 6.84  | 80.1  | K219k       | 211  | (R)GAL/GI/IN/PAST/GA/AK/AV/GK(V)          | 627.6939 | 1767.012 | 114.0584 | 6.3   | 36053.4  | P04406 | Glyceroldehyde-3-phosphate dehydrogenase                            | LlNl    | 1.93E-06 |    |         |  | -2    |
| 148 | 3 | 9.02  | 2.95  | 67.4  | K216k       | 214  | (K)TKA/IG/L/D/DY/SM/R(F)                  | 657.0086 | 1854.944 | 114.0666 | 11.7  | 32761.5  | Q9UH55 | GPN-loop GTPase 3                                                   | LlNl    | 1.01E-11 | 33 | 2.2E-02 |  |       |
| 149 | 4 | 16.26 | 16.26 | 78.5  | K18k K29k   | 216  | (R)MDK/V/ML/D/E/V/L/S/K/L/SQRT(D)         | 580.0538 | 2089.096 | 228.976  | 5.1   | 18335.9  | P24522 | Growth arrest and DNA-damage-inducible protein GADD45 alpha         | LlNl    |          | 38 | 1.0E-02 |  |       |
| 150 | 3 | 17.20 | 17.20 | 82.9  | K29k        | 19   | (K)W/G/D/AL/EEV/L/S/K/L/SQRT(T)           | 610.3338 | 1714.933 | 114.0535 | 5.8   | 18335.9  | P24522 | Growth arrest and DNA-damage-inducible protein GADD45 alpha         | LlNl    | 3.34E-13 | 38 | 1.1E-02 |  |       |
| 151 | 3 | 16.97 | 16.97 | 69.7  | K159k       | 153  | (K)SNY/FP/EG/PI/FL/W/LAR(K)               | 633.6607 | 1784.912 | 114.0557 | 6.7   | 24423.2  | P62826 | GTP-binding nuclear protein Ran                                     | LlNl    | 1.31E-06 |    |         |  | -5.5  |
| 152 | 3 | 12.23 | 6.86  | 76.4  | K829k       | 825  | (K)DVI/IKQADY/V/PS/D/QD/LLR(C)            | 734.7257 | 2088.997 | 114.0654 | 10.2  | 11025.1  | Q5JWF2 | Guanine nucleotide-binding protein G(s) subunit alpha isoforms XLas | LlNl    | 1.03E-12 |    |         |  | -3    |
| 153 | 3 | 16.33 | 16.33 | 76.0  | K917k       | 909  | (R)LQEA/LN/LFK/S/PM/WN/R(W)               | 654.0232 | 1845.997 | 114.0581 | 7.7   | 11025.1  | Q5JWF2 | Guanine nucleotide-binding protein G(s) subunit alpha isoforms XLas | LlNl    | 4.73E-13 | 32 | 3.5E-02 |  | -1.2  |
| 154 | 3 | 11.77 | 11.77 | 81.7  | K655k       | 633  | (K)SK/ED/Y/FP/FA/R(Y)                     | 533.2899 | 1501.769 | 114.0563 | 12.4  | 10253    | Q5JWF2 | Guanine nucleotide-binding protein G(s) subunit alpha isoforms XLas | LlNl    | 6.10E-05 |    |         |  |       |
| 155 | 3 | 15.37 | 10.44 | 80.5  | K139k       | 128  | (R)TILM/W/L/V/EG/CK(Y)                    | 516.2895 | 1432.798 | 114.0517 | 5.1   | 3441.9   | P63244 | Guanine nucleotide-binding protein subunit beta-2-like 1            | LlNl    | 2.83E-07 | 40 | 4.8E-03 |  | -1.3  |
| 156 | 3 | 23.03 | 13.91 | 93.9  | K172k       | 158  | (R)FSP/NSN/PII/VS/IC/GW/DL/K(V/K)         | 788.0759 | 2248.143 | 114.0701 | 11.5  | 35076.9  | P63244 | Guanine nucleotide-binding protein subunit beta-2-like 1            | LlNl    |          |    |         |  | -2.2  |
| 157 | 3 | 17.36 | 17.36 | 87.8  | K175k       | 173  | (K)LVK/VW/N/A/N/CK(L)                     | 486.9427 | 1344.746 |          |       |          |        |                                                                     |         |          |    |         |  |       |

|     |   |       |       |      |        |      |                                            |           |          |          |      |          |        |                                                               |         |          |    |         |  |       |
|-----|---|-------|-------|------|--------|------|--------------------------------------------|-----------|----------|----------|------|----------|--------|---------------------------------------------------------------|---------|----------|----|---------|--|-------|
| 206 | 3 | 13.79 | 13.79 | 66.8 | K300k  | 292  | (K)TGVV/POLVKL/GASEL/PIV/TPALR(A)          | 862.5227  | 2471.496 | 114.0576 | 5.7  | 57862.2  | P5292Z | Importin subunit alpha-2                                      | LlNl    | 1.10E-06 |    |         |  | -1.3  |
| 207 | 3 | 15.62 | 15.62 | 86.9 | K459k  | 454  | (K)LGTEKLS/IIIM/IE/E/C/GLD/K(I)            | 746.0351  | 2122.041 | 114.0501 | 3.2  | 57862.2  | P5292Z | Importin subunit alpha-2                                      | LlNl    | 1.36E-23 | 49 | 5.4E-04 |  | -1.1  |
| 208 | 3 | 11.43 | 11.43 | 62.5 | K537k  | 526  | (R)SSAYE/SLMEIVL/KNS/A(K/D)                | 624.3175  | 1756.879 | 114.0594 | 8.8  | 91710.8  | Q14974 | Importin subunit beta-1                                       | LlNl    | 5.57E-14 |    |         |  |       |
| 209 | 3 | 19.41 | 19.41 | 90.5 | K730k  | 730  | (K)RYLEV/LVNTL/Q/Q/AS/QA/Q/V/D(K/S)        | 797.1073  | 2275.729 | 114.0652 | 9.3  | 91710.8  | Q14974 | Importin subunit beta-1                                       | LlNl    | 7.62E-16 | 43 | 2.8E-03 |  | -9.8  |
| 210 | 3 | 22.96 | 22.96 | 93.3 | K243k  | 240  | (R)LLVPT/TVY/VA/SA/ME/VE/GAT(R/N)          | 793.4299  | 2222.232 | 114.0598 | 3.2  | 93822.9  | Q9N218 | Inulin-like growth factor 2 mRNA-binding protein 1            | LlNl    | 9.47E-05 | 45 | 6.4E-04 |  | -3.5  |
| 211 | 3 | 18.12 | 11.62 | 83.4 | K412k  | 440  | (K)KIAIP/ET/D/D/SK/V(R/M)                  | 477.5566  | 1309.771 | 114.0412 | 1.2  | 63456.8  | Q9N218 | Inulin-like growth factor 2 mRNA-binding protein 1            | LlNl    | 2.98E-08 | 43 | 2.0E-03 |  | -5.1  |
| 212 | 3 | 18.85 | 10.79 | 82.1 | K141k  | 128  | (K)ILP/TE/AV/AA/LGNK/IV/ESL(R/A)           | 796.4418  | 2093.233 | 114.0778 | 15.9 | 43290.6  | Q12905 | Interleukin enhancer-binding factor 2                         | LlNl    |          |    |         |  |       |
| 213 | 3 | 11.12 | 11.12 | 61.7 | K328k  | 369  | (R)KILGQ/EGDAS/YLASE/STW/DGVI/IT/P/SEK(A)  | 1026.8804 | 3093.563 | 114.0664 | 6.6  | 43062.4  | Q12905 | Interleukin enhancer-binding factor 2                         | LlNl    | 4.68E-07 | 43 | 2.9E-03 |  | -4.4  |
| 214 | 4 | 12.03 | 12.03 | 60.6 | K804k  | 798  | (R)HADLGGK/STY/H/L/L/R(A)                  | 457.7636  | 1713.965 | 114.0679 | 13.7 | 123743.8 | P42702 | Leukemia inhibitory factor receptor                           | LlNl    |          |    |         |  | -7.8  |
| 215 | 3 | 15.38 | 15.38 | 83.8 | K118k  | 113  | (R)NIN/IVF/II/P/IV/VV(K/Y)                 | 587.019   | 1644.984 | 114.0589 | 9.1  | 36688.9  | P00338 | L-lactate dehydrogenase A chain                               | Both    | 1.35E-11 | 28 | 2.3E-02 |  | 4.2   |
| 216 | 3 | 13.39 | 9.48  | 74.7 | K14k   | 6    | (K)DQI/LL/LL/LL/KEQ/TP/ONK(I)              | 730.0517  | 2074.081 | 114.0559 | 7.4  | 36688.9  | P00338 | L-lactate dehydrogenase A chain                               | LlNl    | 1.96E-15 | 32 | 3.6E-02 |  | 4.6   |
| 217 | 3 | 12.47 | 12.47 | 72.7 | K243k  | 233  | (K)QVESA/VE/IV/ML/K(G)                     | 540.6431  | 1505.857 | 114.0574 | 8.9  | 36688.9  | P00338 | L-lactate dehydrogenase A chain                               | LlNl    |          |    |         |  | -1.8  |
| 218 | 3 | 15.86 | 15.86 | 73.3 | K81k   | 77   | (K)VVSG/D/Y/NV/IT/AN/NS/L(K)               | 537.2795  | 1495.775 | 114.0488 | 3.7  | 36688.9  | P00338 | L-lactate dehydrogenase A chain                               | LlNl    | 5.42E-08 |    |         |  | Y     |
| 219 | 3 | 14.77 | 5.61  | 82.0 | K244k  | 234  | (K)MVVESA/VE/IV/ML/K(G)                    | 541.6362  | 1508.939 | 114.0548 | 3.7  | 36638.7  | P07195 | L-lactate dehydrogenase B chain                               | LlNl    | 1.59E-12 | 30 | 3.6E-02 |  | -3.4  |
| 220 | 3 | 19.36 | 14.87 | 84.8 | K108k  | 300  | (R)GLTIS/VN/VA/K/D/DE/VAQL/K(K)            | 793.4415  | 2099.171 | 114.0505 | 3.4  | 36638.7  | P07195 | L-lactate dehydrogenase B chain                               | LlNl    | 1.52E-09 | 31 | 3.9E-02 |  | -4.8  |
| 221 | 3 | 18.24 | 7.15  | 93.2 | K310k  | 300  | (R)GLTIS/VN/VA/K/D/DE/VAQL/K(K)            | 555.8608  | 2099.171 | 114.0505 | 3.5  | 36638.7  | P07195 | L-lactate dehydrogenase B chain                               | LlNl    |          |    |         |  | -3.3  |
| 222 | 3 | 10.58 | 10.58 | 72.0 | K152k  | 149  | (R)GVCKQ/GE/AF/ID/RL(R)                    | 517.2565  | 1435.7   | 114.0551 | 7.9  | 75023.5  | Q94776 | Metastasis-associated protein MTAF2                           | LlNl    | 7.60E-17 | 31 | 2.8E-02 |  | 4.7   |
| 223 | 3 | 15.34 | 9.81  | 75.5 | K241k  | 235  | (K)SFIE/APM/IV/FP/ODLLE/K(G)               | 696.7211  | 1974.095 | 114.0541 | 5.4  | 41488.6  | Q9CT99 | Minor histocompatibility antigen H13                          | LlNl    | 5.48E-05 |    |         |  | -2.5  |
| 224 | 3 | 23.78 | 23.78 | 90.7 | K27k   | 17   | (K)LD/PLG/LI/MEQV/K/Q/VA/VA/A/Q/E/L/Q/R(M) | 964.2062  | 2776.539 | 114.0651 | 7.7  | 10500.1  | Q9Y5L4 | Mitochondrial import inner membrane translocase subunit Tim13 | LlNl    | 9.90E-34 | 77 | 5.0E-07 |  | -16.1 |
| 225 | 4 | 13.70 | 13.70 | 63.3 | K312k  | 296  | (R)TVLH/EA/LEDD/PLA/AF/K/Q/R(Q)            | 583.3081  | 2216.135 | 114.0766 | 14.2 | 39646.4  | Q32C08 | Mitochondrial import inner membrane translocase subunit TIM50 | LlNl    | 1.25E-06 |    |         |  |       |
| 226 | 2 | 17.64 | 17.64 | 86.7 | K80k   | 74   | (R)FA/QV/IL/D/K/G/Q/L(C)                   | 595.3212  | 1075.59  | 114.0457 | 2.3  | 9343.6   | Q9Y5J9 | Mitochondrial import inner membrane translocase subunit TIM8  | Both    | 5.34E-11 | 46 | 1.3E-03 |  | -6    |
| 227 | 3 | 18.66 | 18.66 | 77.0 | K209k  | 194  | (K)IA/Q/D/LEM/Y/GV/NY/FS/IK/N(K/K)         | 749.7138  | 2133.068 | 114.0583 | 6.9  | 67820.4  | P26038 | Moesin                                                        | LlNl    | 5.05E-09 | 30 | 5.4E-02 |  | -3    |
| 228 | 3 | 12.43 | 12.43 | 69.9 | K109k  | 106  | (K)EIA/K/MAE/ML/LV/ELV(R/R)                | 582.6562  | 1631.886 | 114.0681 | 14.4 | 14649.7  | Q9Y605 | MORF4 family-associated protein 1                             | Both    | 4.74E-13 | 52 | 3.4E-04 |  | -3    |
| 229 | 3 | 11.70 | 6.22  | 81.0 | K107k  | 95   | (R)KLVIG/S/PT/NAE/IV/LK/V/GN/P(K/S)        | 693.0558  | 1963.097 | 114.0557 | 6.2  | 22764.1  | P14649 | Mysin light chain b6                                          | LlNl    | 5.42E-08 |    |         |  | Y     |
| 230 | 4 | 15.84 | 15.84 | 81.8 | K91k   | 78   | (R)KLVIG/S/PT/NAE/IV/LK/V/GN/P(K/S)        | 514.2813  | 1598.046 | 114.0578 | 7.2  | 19388.9  | Q9Y621 | N-acetyltransferase 13                                        | LlNl    | 1.07E-04 |    |         |  | -4.8  |
| 231 | 3 | 14.96 | 5.66  | 86.5 | K11k   | 64   | (R)TAL/EA/IA/IV/L/D/NN/IF/R(G)             | 793.4299  | 2222.232 | 114.0598 | 1.2  | 55811.9  | Q9N218 | Non-POU domain-containing octamer-binding protein             | LlNl    | 6.55E-07 | 31 | 4.0E-02 |  | -3.0  |
| 232 | 4 | 15.49 | 15.49 | 79.5 | K371k  | 438  | (R)RO/Q/GE/AF/G/TF/PD/A/R(E)               | 365.4748  | 1536.819 | 114.0583 | 8.8  | 54231.9  | Q15233 | Non-POU domain-containing octamer-binding protein             | LlNl    | 2.90E-13 | 46 | 1.3E-03 |  | -5.5  |
| 233 | 3 | 14.23 | 14.23 | 78.5 | K467k  | 457  | (R)AA/PA/EA/FA/IN/KN/R(K)                  | 448.2354  | 1228.643 | 114.0484 | 4.4  | 54231.9  | Q15233 | Non-POU domain-containing octamer-binding protein             | LlNl    |          |    |         |  |       |
| 234 | 3 | 13.04 | 13.04 | 82.0 | K1548k | 1535 | (R)TLT/Q/SL/T/PO/PLL/K/ALYYTESK(M)         | 873.4893  | 2504.401 | 114.0523 | 3.6  | 227921.8 | Q92621 | Nuclear pore complex protein Nup205                           | LlNl    | 3.13E-13 |    |         |  | -1.9  |
| 235 | 3 | 16.97 | 10.15 | 78.8 | K302k  | 293  | (K)AE/V/IL/DE/IA/A/K/LG/LR(K)              | 533.305   | 1483.848 | 114.0526 | 6    | 68120.6  | Q87AT6 | Nuclear pore localization protein 4 homolog                   | LlNl    | 5.17E-09 | 53 | 2.0E-04 |  | -2.9  |
| 236 | 3 | 16.36 | 16.36 | 86.2 | K55k   | 50   | (K)AAI/IV/EK/LS/PL/FP/Q(K/I)               | 548.9859  | 1530.889 | 114.0541 | 6.8  | 14478.6  | P61970 | Nuclear transport factor 2                                    | LlNl    | 9.21E-07 |    |         |  | -2.9  |
| 237 | 4 | 14.95 | 7.09  | 82.1 | K56k   | 50   | (K)EHYV/D/LK/D/RP/FA/G/LV/K(Y)             | 537.7859  | 2034.081 | 114.0441 | -0.9 | 17148.8  | P15531 | Nucleoside diphosphate kinase A                               | LlNl    | 3.10E-07 |    |         |  | -2.6  |
| 238 | 3 | 15.26 | 15.26 | 85.3 | K105k  | 105  | (R)RY/AV/IL/Q/PL/F/D/K(R)                  | 533.2644  | 1484.815 | 114.0499 | 4.3  | 45374.4  | P55209 | Nucleosome assembly protein 1-like 1                          | LlNl    | 1.17E-10 | 32 | 3.3E-02 |  | -3.1  |
| 239 | 3 | 9.96  | 9.96  | 62.9 | K24k   | 24   | (R)KLVIG/S/TS/TA/T/NS/TS/VS/SR(K)          | 628.323   | 1768.903 | 114.0509 | 4.2  | 11986.6  | Q15004 | PCNA-associated factor                                        | Vehicle | 4.96E-20 | 32 | 3.2E-02 |  |       |
| 240 | 2 | 13.33 | 13.33 | 76.8 | K201k  | 47   | (K)LLN/IL/VE/L/FP/CSST(I)                  | 790.4393  | 1726.831 | 114.0562 | 9.8  | 10166.9  | Q13794 | Phorbol-12-myristate-13-acetate-induced protein 1             | LlNl    | 1.07E-04 |    |         |  |       |
| 241 | 2 | 21.02 | 18.37 | 85.4 | K96k   | 74   | (R)MI/PAE/IG/SL/TV/SS/TK/VA/IPCYR(T)       | 683.0832  | 2639.255 | 114.0576 | 5.3  | 31540.2  | Q9Y617 | Phorbol-12-myristate transfer protein beta isoform            | LlNl    | 3.34E-27 | 33 | 2.3E-02 |  | -2.2  |
| 242 | 4 | 13.89 | 6.84  | 72.4 | K103k  | 87   | (K)GAI/AG/QL/TV/SS/SL/TK/PE/R(D)           | 545.577   | 2066.14  | 114.0689 | 11.9 | 62633.7  | Q9Y755 | Phosphatidylinositol-4-phosphate 5-kinase type-1 alpha        | Vehicle | 2.60E-06 |    |         |  |       |
| 243 | 4 | 10.72 | 10.72 | 69.7 | K27k   | 17   | (K)LP/H/S/L/VE/LQ/ELL/D/Y/K(G)             | 538.8097  | 2038.158 | 114.0587 | 7.3  | 40422.9  | Q9Y617 | Phosphoserine aminotransferase                                | LlNl    | 7.24E-08 |    |         |  |       |
| 244 | 3 | 22.94 | 12.97 | 97.4 | K323k  | 320  | (R)FL/D/K/AL/EL/NM/L/SL/K(G)               | 583.6673  | 1634.919 | 114.0688 | 14.8 | 40422.9  | Q9Y617 | Phosphoserine aminotransferase                                | Both    | 7.65E-13 | 55 | 9.9E-05 |  | -7.9  |
| 245 | 3 | 19.26 | 19.26 | 88.5 | K51k   | 46   | (R)S/S/D/FA/IK/IN/IV/ENL/V(R/E)            | 645.6729  | 1820.95  | 114.0554 | 5.7  | 40422.9  | Q9Y617 | Phosphoserine aminotransferase                                | LlNl    | 1.14E-28 | 60 | 5.5E-05 |  | -10.7 |
| 246 | 4 | 11.16 | 11.16 | 62.4 | K207k  | 205  | (K)KLP/HEL/IL/M/QLLE/E/T/PE/E(K/Q)         | 641.8327  | 2450.267 | 114.0442 | -0.4 | 25669.4  | P68402 | Platelet-activating factor acetylhydrolase IB subunit beta    | LlNl    |          |    |         |  | -3.1  |
| 247 | 3 | 13.81 | 13.81 | 55.3 | K165k  | 157  | (R)WY/HP/CFQ/V/K/N(R/E)                    | 526.5885  | 1463.7   | 114.0508 | 5    | 113084.4 | Q9P874 | Poly [ADP-ribose] polymerase 1                                | Vehicle | 8.78E-06 |    |         |  | -4    |
| 248 | 3 | 21.65 | 11.47 | 93.4 | K269k  | 263  | (K)ELL/IL/IN/Q/Q/V/PS/GE/SAL/D(R/V)        | 791.0942  | 2257.219 | 114.0494 | 2.7  | 113084.4 | Q9P874 | Poly [ADP-ribose] polymerase 1                                | Vehicle | 2.58E-11 |    |         |  | -4    |
| 249 | 3 | 15.68 | 8.04  | 78.9 | K278k  | 268  | (K)AL/N/AM/IG/SG/K/IF/E/PLV(R/D)           | 642.0245  | 1810.004 | 114.0546 | 6    | 273801.9 | Q9P209 | Pre-mRNA-processing-splicing factor 8                         | LlNl    | 1.97E-22 | 32 | 3.4E-02 |  | -1.8  |
| 250 | 3 | 15.85 | 7.41  | 74.2 | K272k  | 722  | (K)AN/IV/K/V/ML/PT/PI/EN/ML/IR(Y)          | 791.7795  | 2259.268 | 114.0569 | 6.9  | 273801.9 | Q9P209 | Pre-mRNA-processing-splicing factor 8                         | LlNl    | 3.34E-27 | 33 | 2.3E-02 |  | -2.2  |
| 251 | 3 | 19.06 | 10.98 | 58.8 | K207k  | 205  | (K)DAE/AE/AG/SL/TV/SS/TK/VA/PCYR(E)        | 784.262   | 2253.203 | 114.0715 | 12.4 | 30943.9  | Q9Y617 | Pre-mRNA transfer protein beta isoform                        | Both    |          |    |         |  | -1.5  |
| 252 | 3 | 14.92 | 14.92 | 75.6 | K456k  | 453  | (R)EL/IL/VE/EA/NQ/AN/IN/P(K/L)             | 641.8926  | 1809.012 | 114.0516 | 4.5  | 72371.8  | Q92841 | Probable ATP-dependent RNA helicase DDX17                     | LlNl    | 2.57E-12 |    |         |  |       |
| 253 | 3 | 16.76 | 16.76 | 81.1 | K470k  | 462  | (R)E/AN/QA/IN/P/K/L/QL/V/EDR(G)            | 689.0399  | 1951.061 | 114.0444 | 0.7  | 69148.5  | P17844 | Probable ATP-dependent RNA helicase DDX5                      | LlNl    | 8.49E-05 |    |         |  | -3.9  |
| 254 | 3 | 11.50 | 5.98  | 69.5 | K54k   | 39   | (K)TF/IVN/T/PAE/IV/GV/IL/G/DK(R/S)         | 607.0397  | 1915.065 | 114.0398 | -1.5 | 15054.3  | Q97737 | Profilin-1                                                    | Vehicle |          |    |         |  | -3.3  |
| 255 | 3 | 19.32 | 13.78 | 87.2 | K707k  | 703  | (R)DE/L/L/D/L/Q/Q/SA/IA(R/E)               | 548.3017  | 1528.833 | 114.0576 | 8.9  | 96023.6  | Q8W0M4 | Programmed cell death 6-interacting protein                   | LlNl    | 1.97E-22 | 32 | 3.4E-02 |  | -1.8  |
| 256 | 4 | 20.68 | 20.68 | 94.4 | K164k  | 150  | (R)DL/SH/G/D/VA/IV/SI/CA/D/GV/K(F)         | 525.2778  | 1984.017 | 114.0726 | 14.1 | 28769    | P12004 | Proliferating cell nuclear antigen                            | Both    | 1.53E-18 | 38 | 8.9E-03 |  | -3.5  |
| 257 | 2 | 12.36 | 12.36 | 79.8 | K254k  | 249  | (K)Y/IL/IA/P/KN/IE/DE/EG(S/L)              | 814.3819  | 1513.706 | 114.0508 | 4.9  | 28769    | P12004 | Proliferating cell nuclear antigen                            | LlNl    | 1.11E-18 |    |         |  | -2.7  |
| 258 | 3 | 10.97 | 10.97 | 60.6 | K21k   | 17   | (R)G/AS/NK/IV/ME/IV/R(A)                   | 466.5789  | 1283.674 | 114.0479 | 3.5  | 42153.5  | Q16186 | Proteasomal ubiquitin receptor ADRM1                          | LlNl    | 2.80E-13 |    |         |  | -2.5  |
| 259 | 3 | 16.38 | 11.61 | 79.9 | K34k   | 31   | (K)MS/L/K/G/T/IV/TF/PDK(R)                 | 464.5815  | 1277.677 | 114.0593 | 7.2  | 42438.6  | Q16186 | Proteasomal ubiquitin receptor ADRM1                          | LlNl    |          | 46 | 1.4E-03 |  | -3.9  |
| 260 | 2 | 13.17 | 5.79  | 83.8 | K239k  | 232  | (K)E/L/EL/VE/IK/D(I)                       | 695.944   | 1261.831 | 114.054  | 8.3  | 26582.8  | P28066 | Proteasome subunit alpha-type-5                               | LlNl    | 4.41E-10 | 31 | 4.7E-02 |  | -4    |
| 261 | 3 | 18.83 | 13.83 | 85   | K207k  | 197  | (R)E/VE/LQ/SL/IV/SI/OT/EA/R(D)             | 791.7795  | 2259.268 | 114.0569 | 6.9  | 273801.9 | Q9P209 | Proteasome subunit beta-type-4                                | LlNl    | 1.49E-11 |    |         |  | -1.2  |
| 262 | 4 | 13.29 | 13.29 | 67.4 | K377k  | 372  | (R)W/EN/HK/SL/D/LE/IA/OT/YO/R(I)           | 565.5385  | 2145.047 | 114.085  | 18.6 | 57819.3  | Q9Y755 | Protein araine-2 homolog 2                                    | LlNl    | 1.34E-11 |    |         |  |       |
| 263 | 4 | 12.66 | 12.66 | 53.2 | K153k  | 140  | (R)DM/LL/AN/PH/EL/SL/LK/R(N/R)             | 499.024   | 1879.011 | 114.0636 | 1    |          |        |                                                               |         |          |    |         |  |       |

|     |   |       |       |       |             |     |                                                                 |           |          |          |       |          |        |                                                           |         |          |      |         |  |  |      |       |
|-----|---|-------|-------|-------|-------------|-----|-----------------------------------------------------------------|-----------|----------|----------|-------|----------|--------|-----------------------------------------------------------|---------|----------|------|---------|--|--|------|-------|
| 312 | 3 | 11.09 | 11.09 | 60.8  | K524k       | 513 | (K)GVLLFY(GP)GGGKTL(A)K(A)                                      | 631.346   | 1777.967 | 114.0565 | 7.2   | 89322.3  | P55072 | Transitional endoplasmic reticulum ATPase                 | LtL     |          |      |         |  |  | -3   |       |
| 313 | 3 | 12.14 | 12.14 | 71.5  | K651k       | 639 | (R)LDLQILVILP(L)PDEKSR(V)                                       | 638.6839  | 1799.99  | 114.047  | 2.1   | 89322.3  | P55072 | Transitional endoplasmic reticulum ATPase                 | LtL     | 5.38E-15 | 35   | 1.8E-02 |  |  | -4.4 |       |
| 314 | 3 | 11.60 | 11.60 | 61.0  | K658k       | 654 | (R)VAII/LK/AN/LR(K)                                             | 371.2373  | 997.652  | 114.0457 | 2.5   | 89322.3  | P55072 | Transitional endoplasmic reticulum ATPase                 | LtL     | 7.77E-07 | 42   | 5.7E-04 |  |  | -1.8 |       |
| 315 | 3 | 14.08 | 14.08 | 80.3  | K668k       | 664 | (K)SPVAKD(DV)D(L)E/L(A)K(M)                                     | 549.3025  | 1531.837 | 114.0563 | 8.1   | 89322.3  | P55072 | Transitional endoplasmic reticulum ATPase                 | LtL     | 4.03E-10 | 36   | 1.4E-02 |  |  | -4.6 |       |
| 316 | 3 | 19.18 | 19.18 | 83.3  | K178k       | 61  | (R)GVNMLALVADV(G)SGQ(F)PVTR(G)                                  | 736.7183  | 2094.06  | 114.0603 | 7.0   | 18998.7  | P51571 | Translocin-associated protein subunit delta               | LtL     | 7.87E-10 | 31   | 4.9E-02 |  |  |      |       |
| 317 | 4 | 17.24 | 17.24 | 81.5  | K118k       | 13  | (R)VVAAK(P)TLRSYIQ(L)SHR(N)                                     | 560.8261  | 2126.213 | 114.0665 | 10.5  | 21175.1  | Q91004 | Transmembrane and coiled-coil domain-containing protein 1 | LtL     | 4.88E-06 | 37   | 4.8E-03 |  |  |      | -3    |
| 318 | 3 | 14.18 | 6.75  | 78.1  | K68k        | 83  | (R)LIQV(P)K(G)PVE(G)YEENE(E)FLR(T)                              | 802.7571  | 2346.198 | 114.0591 | 6.6   | 14199.5  | Q9U130 | TRM112-like protein                                       | LtL     | 3.84E-11 |      |         |  |  |      | -1.2  |
| 319 | 3 | 17.40 | 17.40 | 83.0  | K112k       | 106 | (R)GHYI(V)WKG(E)I(L)D(L)D(L)R(I)                                | 625.8707  | 1842.012 | 114.0156 | -14   | 50135.9  | Q7U036 | Tubulin alpha-1A chain                                    | LtL     | 4.85E-28 | 59   | 7.3E-05 |  |  |      | -1.3  |
| 320 | 3 | 17.78 | 11.20 | 84.6  | K326k       | 321 | (R)GDVIV(D)P(D)NVA(A)I(A)T(I)K(T)                               | 575.6588  | 1610.911 | 114.0506 | 4.5   | 50135.9  | Q7U036 | Tubulin alpha-1A chain                                    | Both    | 2.41E-13 | 42   | 2.5E-03 |  |  |      | -2.4  |
| 321 | 4 | 10.52 | 10.52 | 64.6  | K326k K336k | 321 | (R)GDVIV(P)D(N)VA(A)I(A)T(I)K(R)                                | 517.7957  | 1840.054 | 228.1071 | 10.3  | 50135.9  | Q7U036 | Tubulin alpha-1A chain                                    | Both    | 4.69E-05 |      |         |  |  |      | -1.1  |
| 322 | 3 | 14.34 | 14.34 | 84.5  | K336k       | 327 | (K)D(V)NVA(A)I(A)T(I)K(I)K(R)                                   | 455.5957  | 1244.721 | 114.0517 | 6.4   | 50135.9  | Q7U036 | Tubulin alpha-1A chain                                    | LtL     | 1.42E-12 | 34   | 2.0E-02 |  |  |      | -1.3  |
| 323 | 3 | 20.07 | 16.36 | 97.3  | K370k       | 353 | (K)GVN(Y)Q(P)PTTIV(I)P(G)D(L)A(K)VQR(A)                         | 774.7622  | 2208.213 | 114.0585 | 6.7   | 50135.9  | Q7U036 | Tubulin alpha-1A chain                                    | Both    | 4.16E-22 | 54   | 1.6E-04 |  |  |      | -9    |
| 324 | 4 | 24.96 | 24.96 | 94.5  | K60k        | 41  | (K)TI(G)GGD(S)F(N)T(F)S(E)T(G)A(G)K(H)V(P)R(A)                  | 653.5588  | 2497.174 | 114.0391 | -1.5  | 50135.9  | Q7U036 | Tubulin alpha-1A chain                                    | Both    | 3.88E-05 | 41   | 2.1E-03 |  |  |      | -9.7  |
| 325 | 4 | 19.93 | 19.93 | 93.1  | K96k        | 85  | (R)DLFHP(E)Q(L)T(G)R(E)DAANN(N)YA(R)G                           | 633.0715  | 2415.205 | 114.059  | 6.4   | 50135.9  | Q7U036 | Tubulin alpha-1A chain                                    | Both    | 2.30E-11 |      |         |  |  |      | -7.8  |
| 326 | 3 | 17.30 | 17.30 | 86.0  | K297k       | 283 | (R)AL(T)V(I)P(L)TQGV(D)AN(M)M(A)ACD(P)R(H)                      | 940.7958  | 2736.305 | 114.0568 | 8.9   | 43671.1  | P07437 | Tubulin beta chain                                        | LtL     | 1.60E-05 |      |         |  |  |      |       |
| 327 | 3 | 24.42 | 24.42 | 93.1  | K58k        | 47  | (R)S(V)N(Y)N(E)A(T)T(G)K(Y)N(P)R(A)                             | 844.3262  | 1816.923 | 114.0502 | 3.8   | 43671.1  | P07437 | Tubulin beta chain                                        | Both    | 1.24E-24 | 72   | 3.6E-06 |  |  |      | -10.5 |
| 328 | 3 | 9.61  | 5.17  | 60.6  | K252k       | 252 | (R)K(L)AVN(M)V(P)P(R)R(L)                                       | 462.5983  | 1271.729 | 114.0511 | 5.9   | 50327.2  | Q9H487 | Tubulin beta-1 chain                                      | Both    | 2.09E-10 |      |         |  |  |      | -3.9  |
| 329 | 3 | 17.30 | 17.30 | 92.2  | K324k       | 321 | (R)M(S)M(E)Y(D)E(Q)M(L)N(V)Q(N)K(N)                             | 679.9829  | 1923.897 | 114.0669 | 11.7  | 49907.3  | O13885 | Tubulin beta-2A chain                                     | LtL     | 3.77E-13 | 40   | 3.0E-03 |  |  |      | -2    |
| 330 | 3 | 17.09 | 17.09 | 72.6  | K58k        | 4   | (R)IN(V)I(Y)N(A)T(G)R(G)K(Y)P(R)A                               | 653.334   | 1843.934 | 114.0537 | 5.5   | 49831.3  | P68371 | Tubulin beta-2C chain                                     | Both    | 1.92E-05 | 30   | 5.1E-02 |  |  |      | -4.2  |
| 331 | 3 | 15.81 | 9.62  | 82.2  | K412k       | 401 | (R)T(V)I(S)G(L)Q(V)F(K)P(E)E(L)Q(D)R(L)                         | 720.0587  | 2044.107 | 114.0542 | 5.2   | 59143.8  | P54577 | Tyrosyl-tRNA synthetase, cytoplasmic                      | LtL     | 6.20E-07 |      |         |  |  |      | -3.7  |
| 332 | 3 | 12.10 | 12.10 | 72.3  | K513k       | 507 | (K)Q(T)N(F)M(L)K(G)I(S)C(K)S                                    | 576.9535  | 1614.798 | 114.0481 | 3     | 59143.8  | P54577 | Tyrosyl-tRNA synthetase, cytoplasmic                      | LtL     | 6.39E-16 | 47   | 7.2E-04 |  |  |      | -2.2  |
| 333 | 4 | 17.08 | 13.70 | 72.9  | K329k       | 319 | (K)V(L)Y(V)D(M)LAG(L)I(P)V(H)Q(V)R(G)                           | 582.8332  | 2214.247 | 114.0642 | 9.1   | 62003.9  | Q9Y5J1 | U3 small nucleolar RNA-associated protein 18 homolog      | Both    | 2.80E-02 | 28   | 4.8E-02 |  |  |      |       |
| 334 | 2 | 25.09 | 25.09 | 97.6  | K11k        | 7   | (K)T(L)T(G)K(I)T(I)T(L)E(I)P(S)D(T)E(N)N(V)K(A)                 | 1201.6458 | 2288.223 | 114.0612 | 7.6   | 8564.9   | P62988 | Ubiquitin                                                 | Both    | 4.88E-19 | 53   | 2.7E-04 |  |  |      | -11.5 |
| 335 | 4 | 13.45 | 9.13  | 68.3  | K11k K27k   | 7   | (K)T(L)T(G)K(I)T(L)E(V)E(P)S(D)T(I)E(N)K(A)K(I)                 | 679.6212  | 2487.355 | 228.1077 | 8.1   | 8564.9   | P62988 | Ubiquitin                                                 | LtL     |          |      |         |  |  |      | -1.6  |
| 336 | 3 | 23.06 | 11.27 | 96.9  | K27k        | 12  | (K)T(L)T(G)K(I)T(L)E(V)E(P)S(D)T(I)E(N)K(A)K(I)                 | 701.0411  | 2487.355 | 114.0494 | 3     | 8564.9   | P62988 | Ubiquitin                                                 | Both    | 7.40E-17 | 48   | 9.6E-04 |  |  |      | -1.9  |
| 337 | 4 | 17.40 | 8.26  | 91.6  | K27k K29k   | 12  | (K)T(L)T(G)K(I)T(L)E(V)E(P)S(D)T(I)E(N)K(A)K(I)Q(D)K(E)         | 676.6143  | 2271.324 | 228.1114 | 4.5   | 8564.9   | P62988 | Ubiquitin                                                 | LtL     | 1.49E-14 |      |         |  |  |      | -3.9  |
| 338 | 3 | 14.69 | 8.56  | 84.2  | K29k        | 28  | (K)AK(I)Q(D)K(E)G(I)P(D)Q(D)R(L)                                | 612.9837  | 1722.913 | 114.0232 | -10.7 | 8564.9   | P62988 | Ubiquitin                                                 | LtL     | 7.92E-11 |      |         |  |  |      | -1.1  |
| 339 | 4 | 10.01 | 2.43  | 62.4  | K29k K33k   | 28  | (K)AK(I)Q(D)K(E)G(I)P(D)Q(D)R(L)                                | 488.5043  | 1722.913 | 228.082  | -2    | 8564.9   | P62988 | Ubiquitin                                                 | LtL     | 9.83E-08 |      |         |  |  |      | -2.6  |
| 340 | 3 | 12.50 | 4.99  | 83.3  | K33k        | 30  | (K)I(Q)D(K)E(G)P(V)D(Q)Q(R)L                                    | 546.6133  | 1523.781 | 114.0441 | 0.7   | 8564.9   | P62988 | Ubiquitin                                                 | LtL     | 2.35E-06 |      |         |  |  |      | -1.5  |
| 341 | 2 | 24.82 | 15.45 | 96.6  | K48k        | 43  | (R)I(L)F(A)G(Q)I(L)D(E)G(R)T                                    | 730.8999  | 1346.743 | 114.0498 | 4.7   | 8564.9   | P62988 | Ubiquitin                                                 | Both    | 1.39E-09 | 55   | 1.7E-04 |  |  |      | -6.2  |
| 342 | 3 | 28.38 | 15.15 | 97.9  | K63k        | 55  | (R)T(L)S(D)Y(N)I(Q)K(E)S(T)H(L)V(L)R(L)                         | 748.7436  | 2130.155 | 114.0609 | 8     | 8564.9   | P62988 | Ubiquitin                                                 | Both    | 1.00E-21 | 59   | 6.1E-05 |  |  |      | -9.4  |
| 343 | 3 | 20.80 | 20.80 | 93.0  | K6k         | 11  | (M)Q(I)F(K)I(L)T(G)K(T)                                         | 460.5952  | 1265.729 | 114.0424 | -0.4  | 8564.9   | P62988 | Ubiquitin                                                 | Both    | 5.12E-10 | 54   | 1.2E-04 |  |  |      | -2.9  |
| 344 | 4 | 9.89  | 6.49  | 68.3  | K6k K11k    | 11  | (M)Q(I)F(K)I(L)T(G)K(T)E(V)E(P)S(D)T(I)E(N)K(A)                 | 816.4424  | 3034.638 | 228.1097 | 7.3   | 8564.9   | P62988 | Ubiquitin                                                 | LtL     |          |      |         |  |  |      | -2.5  |
| 345 | 3 | 11.92 | 8.21  | 79.0  | K421k       | 413 | (K)LIJ(E)S(T)L(S)K(S)K(N)                                       | 478.6921  | 1319.742 | 114.0501 | 5     | 294366.9 | Q9UP05 | Ubiquitin carboxyl-terminal hydrolase 24                  | LtL     | 2.22E-05 |      |         |  |  |      |       |
| 346 | 3 | 20.66 | 20.66 | 92.2  | K369k       | 358 | (K)E(L)N(F)Q(N)A(P)D(I)P(T)Q(D)F(S)T(Q)W(A)K(L)                 | 684.7743  | 2476.251 | 114.0573 | 5.5   | 95786.0  | P45974 | Ubiquitin carboxyl-terminal hydrolase 5                   | LtL     | 1.35E-12 | 31   | 4.8E-02 |  |  |      | -3.1  |
| 347 | 3 | 16.07 | 6.87  | 81.0  | K79k        | 30  | (R)S(A)D(S)S(E)S(P)W(P)K(V)R(D)                                 | 604.9507  | 1698.902 | 114.0556 | 6.9   | 95786.0  | P45974 | Ubiquitin carboxyl-terminal hydrolase 5                   | LtL     | 1.79E-05 |      |         |  |  |      | -2    |
| 348 | 3 | 12.68 | 12.68 | 66.6  | K115k       | 100 | (K)I(G)F(E)D(S)G(V)A(Q)F(L)S(E)T(E)K(M)                         | 714.3708  | 2027.033 | 114.0647 | 10.2  | 24824.5  | Q9P936 | Ubiquitin carboxyl-terminal hydrolase isozyme L1          | LtL     | 1.28E-11 |      |         |  |  |      | -1.5  |
| 349 | 4 | 15.84 | 15.84 | 88.5  | K210k       | 187 | (R)K(P)P(F)N(G)E(S)D(E)T(L)E(D)A(I)E(N)C(A)K(F)                 | 618.8753  | 2870.424 | 114.0553 | 4.2   | 26182.7  | P15374 | Ubiquitin carboxyl-terminal hydrolase isozyme L3          | LtL     | 7.36E-07 | 31   | 4.5E-02 |  |  |      | -3.7  |
| 350 | 2 | 16.90 | 16.90 | 85.1  | K629k       | 524 | (K)I(T)V(L)G(W)W(Q)Y(F)C(L)                                     | 685.8454  | 1256.631 | 114.0525 | 7     | 57295.2  | O14562 | Ubiquitin domain-containing protein UBFD1                 | Both    | 1.15E-17 | 28   | 5.2E-02 |  |  |      | -4.4  |
| 351 | 4 | 18.93 | 18.93 | 83.2  | K109k       | 95  | (R)A(F)G(S)H(L)E(L)D(D)S(E)L(L)Q(R)F                            | 573.2983  | 2176.103 | 114.0681 | 11    | 31284.2  | Q96FW1 | Ubiquitin thioesterase OTUB1                              | LtL     | 2.20E-07 | 42   | 3.9E-03 |  |  |      | -6.6  |
| 352 | 3 | 11.77 | 11.77 | 76.9  | K178k       | 166 | (K)I(L)A(L)N(P)DA(V)E(L)F(K)K(A)                                | 562.3305  | 1570.92  | 114.0566 | 8.1   | 45338.7  | Q985L1 | Ubiquitin-associated domain-containing protein 1          | LtL     | 5.77E-07 |      |         |  |  |      |       |
| 353 | 4 | 19.21 | 10.83 | 85.8  | K119k       | 98  | (K)F(L)T(P)C(Y)H(N)D(T)G(N)I(C)D(L)W(L)K(E)K(W)                 | 748.1233  | 2875.412 | 114.0597 | 5.6   | 19652.4  | O00762 | Ubiquitin-conjugating enzyme E2 C                         | LtL     |          | 41   | 4.2E-03 |  |  |      | -5.1  |
| 354 | 4 | 18.97 | 11.37 | 84.3  | K121k       | 98  | (K)F(L)T(P)C(Y)H(N)D(T)G(N)I(C)D(L)W(L)K(E)K(W)                 | 748.1275  | 2875.412 | 114.0765 | 11.2  | 19652.4  | O00762 | Ubiquitin-conjugating enzyme E2 C                         | LtL     |          | 39   | 6.0E-03 |  |  |      | -5.7  |
| 355 | 4 | 23.83 | 23.83 | 95.5  | K138k       | 119 | (R)Y(H)C(N)I(N)S(Q)G(V)I(C)D(L)K(D)W(S)P(A)T(I)S(K)V            | 872.4521  | 3372.708 | 114.0787 | 10.3  | 21404.3  | P51965 | Ubiquitin-conjugating enzyme E2 E1                        | LtL     | 3.81E-16 | 37   | 1.1E-02 |  |  |      | -8.3  |
| 356 | 3 | 15.87 | 15.87 | 81.4  | K72k        | 82  | (K)I(P)E(Y)P(F)N(P)R(V)R(E)                                     | 557.9703  | 1557.842 | 114.054  | 6.6   | 22406.9  | P61086 | Ubiquitin-conjugating enzyme E2 K                         | LtL     | 5.17E-09 |      |         |  |  |      |       |
| 357 | 4 | 22.40 | 15.01 | 100.0 | K67k        | 53  | (R)E(I)N(F)P(A)E(Y)P(F)K(P)K(I)T(F)T                            | 599.0789  | 2279.247 | 114.0463 | 1.4   | 17861.7  | P68036 | Ubiquitin-conjugating enzyme E2 L3                        | LtL     | 6.01E-06 |      |         |  |  |      |       |
| 358 | 4 | 22.40 | 15.01 | 100.0 | K71k        | 53  | (R)E(I)N(F)P(A)E(Y)P(F)K(P)K(I)T(F)T                            | 599.0789  | 2279.247 | 114.0463 | 1.4   | 17861.7  | P68036 | Ubiquitin-conjugating enzyme E2 L3                        | LtL     | 4.99E-06 |      |         |  |  |      |       |
| 359 | 2 | 16.81 | 8.84  | 84.5  | K92k        | 86  | (R)I(C)I(D)I(L)K(D)K(W)                                         | 618.3424  | 1117.629 | 114.0449 | 4.9   | 17137.9  | P61088 | Ubiquitin-conjugating enzyme E2 N                         | Both    | 2.11E-07 | 37   | 1.3E-02 |  |  |      | -4.6  |
| 360 | 4 | 13.22 | 13.22 | 70.6  | K132k       | 124 | (R)V(Q)W(Y)P(E)G(V)K(H)K(E)                                     | 428.7308  | 1597.849 | 114.0528 | 5.8   | 141294.2 | Q9OC09 | Ubiquitin-conjugating enzyme E2 O                         | LtL     | 9.26E-06 |      |         |  |  |      |       |
| 361 | 4 | 20.86 | 20.86 | 87.6  | K825k       | 820 | (K)I(L)E(S)L(K)M(T)V(E)Q(L)I(L)T(G)S(P)T(S)P(T)E(P)K(P)T(R)E    | 853.2092  | 3295.745 | 114.0696 | 7.8   | 141294.2 | Q9OC09 | Ubiquitin-conjugating enzyme E2 O                         | LtL     |          |      |         |  |  |      | -2    |
| 362 | 3 | 16.49 | 16.49 | 83.4  | K63k        | 62  | (R)K(L)F(P)D(I)P(Y)S(P)P(A)F(R)F                                | 642.3386  | 1810.953 | 114.0486 | 2.9   | 26736.9  | P49427 | Ubiquitin-conjugating enzyme E2 R1                        | LtL     | 8.51E-06 | 32   | 2.7E-02 |  |  |      | -4.4  |
| 363 | 3 | 22.21 | 22.21 | 81.5  | K197k       | 170 | (R)I(A)I(S)G(T)E(A)S(S)T(D)P(G)A(I)P(G)P(G)G(A)E(G)P(M)A(K)H    | 895.1209  | 2569.22  | 114.0743 | 11.7  | 23845.4  | I41673 | Ubiquitin-conjugating enzyme E2 S                         | Vehicle | 1.49E-15 | 34   | 1.6E-02 |  |  |      | -6.8  |
| 364 | 2 | 20.22 | 15.17 | 93.3  | K91k        | 85  | (R)I(C)I(D)I(V)I(L)K(L)P(P)K(G)                                 | 705.4186  | 1295.776 | 114.0544 | 8.1   | 22521    | Q9NFD8 | Ubiquitin-conjugating enzyme E2 T                         | Both    | 1.06E-15 | 70   | 1.6E-06 |  |  |      |       |
| 365 | 4 | 15.85 | 15.85 | 85.1  | K627k       | 605 | (K)I(G)N(V)Q(V)I(I)P(F)T(E)S(Y)S(S)Q(D)P(P)E(K)S(I)P(I)C(L)K(N) | 887.7112  | 3433.756 | 114.067  | 6.8   | 117849.6 | P22314 | Ubiquitin-like modifier-activating enzyme 1               | LtL     |          | 29</ |         |  |  |      |       |

**Supplementary Table 2** The PDB codes of the crystal structures used for the analysis of secondary structures and solvent-accessible areas for the ubiquitinated lysines and all lysines in the crystal structures.

|      |      |      |      |
|------|------|------|------|
| 1A31 | 1MH1 | 1Z0A | 2OB4 |
| 1A4P | 1NTG | 1Z7G | 2PBD |
| 1ALD | 1OGW | 1ZR3 | 2Q12 |
| 1B3U | 1OQY | 2AGA | 2RIQ |
| 1BJ4 | 1P4R | 2AXN | 2VYI |
| 1C4Z | 1Q02 | 2BR9 | 2ZFY |
| 1E5W | 1Q8G | 2C23 | 2ZKR |
| 1G73 | 1QGR | 2CS2 | 3BOR |
| 1GH2 | 1SYW | 2CV5 | 3BQC |
| 1GK7 | 1U7B | 2DGV | 3BYH |
| 1GY5 | 1U8F | 2DZM | 3BZH |
| 1I0Z | 1UCN | 2E8A | 3CPF |
| 1I10 | 1UEL | 2EC4 | 3E46 |
| 1I7K | 1US0 | 2ETL | 3E77 |
| 1INZ | 1UW5 | 2F3Y | 3EI3 |
| 1J7D | 1VYH | 2G9N | 3FEY |
| 1JDH | 1W7J | 2HDE | 3GJ0 |
| 1JEY | 1WH9 | 2HR0 | 3GR4 |
| 1JMC | 1WTB | 2IE4 | 3I33 |
| 1KMT | 1X4A | 2JKV | 3ULL |
| 1KMV | 1X4B | 2KG4 |      |
| 1LCY | 1XD3 | 2O28 |      |
| 1LM8 | 1YH2 | 2OB0 |      |



### Supplementary References:

1. Garcia-Saez, I., Parraga, A., Phillips, M.F., Mantle, T.J. & Coll, M. Molecular structure at 1.8 Å of mouse liver class pi glutathione S-transferase complexed with S-(p-nitrobenzyl)glutathione and other inhibitors. *J Mol Biol* **237**, 298-314 (1994).
2. Lorick, K.L. et al. RING fingers mediate ubiquitin-conjugating enzyme (E2)-dependent ubiquitination. *Proc Natl Acad Sci U S A* **96**, 11364-11369 (1999).
3. Denis, N.J., Vasilescu, J., Lambert, J.P., Smith, J.C. & Figeys, D. Tryptic digestion of ubiquitin standards reveals an improved strategy for identifying ubiquitinated proteins by mass spectrometry. *Proteomics* **7**, 868-874 (2007).
4. Schwartz, D. & Gygi, S.P. An iterative statistical approach to the identification of protein phosphorylation motifs from large-scale data sets. *Nat Biotechnol* **23**, 1391-1398 (2005).
5. Schneider, T.D. & Stephens, R.M. Sequence Logos - a New Way to Display Consensus Sequences. *Nucleic Acids Research* **18**, 6097-6100 (1990).
6. Crooks, G.E., Hon, G., Chandonia, J.M. & Brenner, S.E. WebLogo: A sequence logo generator. *Genome Research* **14**, 1188-1190 (2004).
7. Peng, J. et al. A proteomics approach to understanding protein ubiquitination. *Nat Biotechnol* **21**, 921-926 (2003).
8. DeLano, W.L. DeLano Scientific, Palo Alto, CA, USA. <http://www.pymol.org>, 2002).
